# Supplementary material for: A pore-size classification for peat bogs derived from unsaturated hydraulic properties
Source: Copernicus journal article supplement (doi:10.5194/hess-21-6185-2017), 2017-12-07
Supplement: Supplementary file 1 [file 2017.Table S1.DISCUSSION01.xlsx]

## Sheet: Model Parameters and AICc
Sample	Model	AICc	THR	THS	LOG10 (ALF1)	LOG10 (N1)-1	W1	LOG10 (ALF2)	LOG10 (N2)-1	W2	LOG10 (ALF2)	LOG10 (N2)-1	LOG10 (KS)	TAU	LOG10 (OMEGA)	AFILM	ha	LOG10 h0
		[ - ]	[ - ]	[ - ]	[ - ]	[ cm-1 ]	[ - ]	[ - ]	[ cm-1 ]	[ - ]	[ - ]	[ cm-1 ]	[ - ]	[ cm d-1 ]	[ - ]	[ cm d-1 ]	cm	(-)
A.1	VGM1	4436.27	0.063544	0.97	-0.996188	-0.197144	NA	NA	NA	NA	NA	NA	4	1.98666	NA	1.5	1/ALFmax	6.8
A.1	VGM2	3998.44	0.002084	0.97	-1.0603	0.136641	0.684838	-2.25399	0.336027	NA	NA	NA	4	1.09894	NA	1.5	1/ALFmax	6.8
A.1	VGM3	3416.62	0.073834	0.97	-1.01284	0.205322	0.625382	-1.68149	0.231916	0.173916	-2.28288	0.819157	4	-0.545535	NA	1.5	1/ALFmax	6.8
A.1	PDI1	4445.65	0.040071	0.97	-0.982942	-0.233933	NA	NA	NA	NA	NA	NA	4	2.15354	-7.02553	1.5	1/ALFmax	6.8
A.1	PDI2	2765.39	0.122897	0.97	-2.24419	0.753866	0.191565	-1.06125	0.084102	NA	NA	NA	4	1.6417	-5.16742	1.5	1/ALFmax	6.8
A.1	PDI3	2348.06	0.142785	0.97	-0.995937	0.288408	0.600542	-1.64229	0.330857	0.204386	-2.26242	0.820804	4	1.53477	-5.10758	1.5	1/ALFmax	6.8
A.2	VGM1	4404.55	0.07187	0.96	-0.996313	-0.170351	NA	NA	NA	NA	NA	NA	4	1.78976	NA	1.5	1/ALFmax	6.8
A.2	VGM2	3970.41	0.012789	0.96	-0.987645	0.361958	0.529589	-1.91509	-0.003177	NA	NA	NA	4	2.30698	NA	1.5	1/ALFmax	6.8
A.2	VGM3	3528.79	0.064663	0.96	-0.919616	0.661533	0.37003	-1.43457	0.056685	0.458919	-2.29002	0.876823	4	-0.214393	NA	1.5	1/ALFmax	6.8
A.2	PDI1	4406.59	0.095647	0.96	-0.99358	-0.168267	NA	NA	NA	NA	NA	NA	4	1.73806	-7.32061	1.5	1/ALFmax	6.8
A.2	PDI2	3584.38	0.07858	0.96	-2.12013	0.275443	0.315124	-0.996447	0.181423	NA	NA	NA	4	2.10666	-5.06758	1.5	1/ALFmax	6.8
A.2	PDI3	2734.21	0.156979	0.96	-0.886844	0.655228	0.39828	-1.4347	0.206654	0.42085	-2.24265	0.811434	4	1.09095	-5.20382	1.5	1/ALFmax	6.8
A.3	VGM1	5336.42	6.1e-05	0.96	-1.25051	-0.181364	NA	NA	NA	NA	NA	NA	4	2.06413	NA	1.5	1/ALFmax	6.8
A.3	VGM2	4746.29	0.000156	0.96	-0.965417	-0.215064	0.768635	-2.13658	0.14657	NA	NA	NA	4	2.52373	NA	1.5	1/ALFmax	6.8
A.3	VGM3	4066.56	0.030605	0.96	-1.09422	-0.10692	0.789289	-2.30217	0.848039	0.209374	-2.35813	0.117488	4	-0.286597	NA	1.5	1/ALFmax	6.8
A.3	PDI1	4549.89	0.001367	0.96	-1.16931	-0.26103	NA	NA	NA	NA	NA	NA	4	3.82791	-5.73598	1.5	1/ALFmax	6.8
A.3	PDI2	3081.29	0.114277	0.96	-1.06612	-0.07151	0.792924	-2.27359	0.700876	NA	NA	NA	4	2.77674	-5.40052	1.5	1/ALFmax	6.8
A.3	PDI3	2687.82	0.150444	0.96	-0.906643	0.067642	0.5313	-1.67545	0.201427	0.275233	-2.30618	0.800684	4	2.27485	-5.23103	1.5	1/ALFmax	6.8
A.4	VGM1	5336.21	0.000103	0.98	-0.139933	-0.368424	NA	NA	NA	NA	NA	NA	4	0.233608	NA	1.5	1/ALFmax	6.8
A.4	VGM2	4694.07	0.000167	0.98	-2.21176	0.752665	0.099675	-0.202751	-0.243311	NA	NA	NA	4	0.053837	NA	1.5	1/ALFmax	6.8
A.4	VGM3	3838.56	0.003932	0.98	0.085975	-0.255059	0.65539	-1.16684	0.425633	0.211746	-2.1883	0.955623	4	-1.4707	NA	1.5	1/ALFmax	6.8
A.4	PDI1	5981.77	0.120569	0.98	-0.301432	-0.216766	NA	NA	NA	NA	NA	NA	4	0.146966	-5.61287	1.5	1/ALFmax	6.8
A.4	PDI2	5043.83	0.000399	0.98	-0.067599	0.537289	0.328491	-0.825974	-0.236695	NA	NA	NA	4	0.580885	-7.30872	1.5	1/ALFmax	6.8
A.4	PDI3	3517.93	0.055918	0.98	-0.087426	0.072489	0.549307	-1.17485	0.380272	0.289036	-2.1601	0.705401	4	0.079602	-4.13403	1.5	1/ALFmax	6.8
A.5	VGM1	4481.76	0.009865	0.98	-0.332989	-0.270909	NA	NA	NA	NA	NA	NA	4	0.10617	NA	1.5	1/ALFmax	6.8
A.5	VGM2	4469.01	4e-05	0.98	-0.354306	-0.078495	0.644613	-0.647883	-0.428491	NA	NA	NA	4	0.366537	NA	1.5	1/ALFmax	6.8
A.5	VGM3	3483.29	0.030166	0.98	0.098713	-0.284148	0.662502	-1.08976	0.329207	0.266091	-2.20341	0.995338	4	-1.16293	NA	1.5	1/ALFmax	6.8
A.5	PDI1	4367.32	0.032231	0.98	-0.347353	-0.252331	NA	NA	NA	NA	NA	NA	4	0.416965	-4.68573	1.5	1/ALFmax	6.8
A.5	PDI2	4373.26	0.036855	0.98	-0.306692	-0.213555	0.79872	-0.660373	-0.301534	NA	NA	NA	4	0.423619	-4.61985	1.5	1/ALFmax	6.8
A.5	PDI3	3051.34	0.100581	0.98	-0.160236	-0.015954	0.611783	-1.10923	0.246686	0.317313	-2.22163	0.902084	4	0.2066	-4.2891	1.5	1/ALFmax	6.8
B.1	VGM1	4085.43	0.017259	0.96	-0.765753	-0.296996	NA	NA	NA	NA	NA	NA	4	1.52794	NA	1.5	1/ALFmax	6.8
B.1	VGM2	3097.39	0.035493	0.96	-2.25211	0.64258	0.219934	-0.846133	-0.014186	NA	NA	NA	4	-0.663366	NA	1.5	1/ALFmax	6.8
B.1	VGM3	2973.11	0.031951	0.96	-0.795497	0.162938	0.591203	-1.61545	-0.023576	0.245191	-2.29103	0.854798	4	-0.854696	NA	1.5	1/ALFmax	6.8
B.1	PDI1	4085.95	0.019418	0.96	-0.761855	-0.301362	NA	NA	NA	NA	NA	NA	4	1.53173	-6.45204	1.5	1/ALFmax	6.8
B.1	PDI2	2572.44	0.095679	0.96	-2.22997	0.597591	0.211992	-0.859972	0.038476	NA	NA	NA	4	1.52627	-4.97178	1.5	1/ALFmax	6.8
B.1	PDI3	1766.34	0.109363	0.96	-0.82363	0.179956	0.661016	-1.73683	0.095698	0.197314	-2.27163	0.741228	4	1.37525	-5.17289	1.5	1/ALFmax	6.8
B.2	VGM1	4390	0.00039	0.98	-0.794762	-0.420637	NA	NA	NA	NA	NA	NA	4	2.27106	NA	1.5	1/ALFmax	6.8
B.2	VGM2	3846.75	0.01941	0.98	-2.14844	0.137984	0.392372	-0.728176	-0.063576	NA	NA	NA	4	1.25313	NA	1.5	1/ALFmax	6.8
B.2	VGM3	3437.9	0.057888	0.98	-0.621166	0.106407	0.417265	-1.43447	-0.217633	0.432807	-2.26377	0.901036	4	0.950221	NA	1.5	1/ALFmax	6.8
B.2	PDI1	4386.55	0.001247	0.98	-0.795592	-0.423941	NA	NA	NA	NA	NA	NA	4	2.27926	-6.62764	1.5	1/ALFmax	6.8
B.2	PDI2	3110.69	0.060649	0.98	-2.18277	0.330582	0.264442	-0.671687	-0.227067	NA	NA	NA	4	1.4717	-4.58718	1.5	1/ALFmax	6.8
B.2	PDI3	2156.69	0.147964	0.98	-0.684602	0.017945	0.583772	-1.78335	0.073745	0.24433	-2.28359	0.768475	4	0.894369	-4.83724	1.5	1/ALFmax	6.8
B.3	VGM1	4403.16	8.3e-05	0.96	-0.790515	-0.413558	NA	NA	NA	NA	NA	NA	4	2.35018	NA	1.5	1/ALFmax	6.8
B.3	VGM2	4065.82	0.003657	0.96	-2.17207	0.19465	0.388333	-0.746335	-0.058446	NA	NA	NA	4	0.61813	NA	1.5	1/ALFmax	6.8
B.3	VGM3	3734.14	0.073642	0.96	-0.734451	0.038963	0.56065	-1.79106	0.093294	0.270893	-2.30996	0.850893	4	-0.365704	NA	1.5	1/ALFmax	6.8
B.3	PDI1	4393.02	0.003266	0.96	-0.807884	-0.408714	NA	NA	NA	NA	NA	NA	4	2.46615	-5.99848	1.5	1/ALFmax	6.8
B.3	PDI2	3013.58	0.13909	0.96	-2.15702	0.407671	0.312	-0.772624	-0.029922	NA	NA	NA	4	1.61161	-4.78677	1.5	1/ALFmax	6.8
B.3	PDI3	2600.43	0.164296	0.96	-0.673341	0.105581	0.538581	-1.63964	0.2207	0.232738	-2.26671	0.673092	4	1.22663	-4.74477	1.5	1/ALFmax	6.8
B.4	VGM1	4296.64	0.000745	0.96	-0.595268	-0.421568	NA	NA	NA	NA	NA	NA	4	1.50058	NA	1.5	1/ALFmax	6.8
B.4	VGM2	3764.32	0.000262	0.96	-2.22352	0.908835	0.135147	-0.54953	-0.335318	NA	NA	NA	4	0.440146	NA	1.5	1/ALFmax	6.8
B.4	VGM3	3510.8	0.036398	0.96	-0.286968	-0.128473	0.41678	-1.24383	0.048334	0.38173	-2.26623	0.800757	4	-1.01154	NA	1.5	1/ALFmax	6.8
B.4	PDI1	4295.07	0.005126	0.96	-0.575658	-0.426492	NA	NA	NA	NA	NA	NA	4	1.44575	-6.88213	1.5	1/ALFmax	6.8
B.4	PDI2	3377.26	0.069988	0.96	-0.544109	-0.200245	0.784785	-2.17916	0.619604	NA	NA	NA	4	0.807149	-4.48992	1.5	1/ALFmax	6.8
B.4	PDI3	2595.32	0.088077	0.96	-0.374437	-0.029106	0.495535	-1.41198	0.20831	0.288619	-2.25359	0.710187	4	0.624847	-4.26738	1.5	1/ALFmax	6.8
B.5	VGM1	5559.04	6.2e-05	0.98	-0.61674	-0.291754	NA	NA	NA	NA	NA	NA	4	1.31082	NA	1.5	1/ALFmax	6.8
B.5	VGM2	4346.92	0.005019	0.98	-0.672009	-0.096844	0.835939	-2.24133	1.14583	NA	NA	NA	4	-1.77965	NA	1.5	1/ALFmax	6.8
B.5	VGM3	3691.8	0.01325	0.98	-0.27539	-0.195124	0.431527	-1.16765	0.29549	0.380235	-2.23294	0.999616	4	-0.853335	NA	1.5	1/ALFmax	6.8
B.5	PDI1	5559.81	0.000729	0.98	-0.616358	-0.292583	NA	NA	NA	NA	NA	NA	4	1.31959	-6.97947	1.5	1/ALFmax	6.8
B.5	PDI2	5524.27	0.000833	0.98	-1.0832	-0.254182	0.482634	-0.458304	-0.163255	NA	NA	NA	4	1.34503	-5.93214	1.5	1/ALFmax	6.8
B.5	PDI3	4041.99	0.018964	0.98	-0.664132	-0.104224	0.846464	-2.12131	0.527395	0.011479	-2.25377	1.08766	4	1.3814	-4.84547	1.5	1/ALFmax	6.8
B.6	VGM1	6738.5	0.000754	0.98	-0.844704	-0.262894	NA	NA	NA	NA	NA	NA	3.75271	1.93774	NA	1.5	1/ALFmax	6.8
B.6	VGM2	6620.94	0.001037	0.98	-0.665549	-0.133752	0.498584	-1.3793	-0.134851	NA	NA	NA	3.75271	1.6134	NA	1.5	1/ALFmax	6.8
B.6	VGM3	4974.52	0.049638	0.98	-0.137819	-0.365303	0.355202	-1.25707	0.381455	0.474359	-2.20208	0.998635	3.75271	-0.139183	NA	1.5	1/ALFmax	6.8
B.6	PDI1	6738.42	0.001067	0.98	-0.847117	-0.26299	NA	NA	NA	NA	NA	NA	3.75271	1.93981	-8.17999	1.5	1/ALFmax	6.8
B.6	PDI2	5112.02	0.050705	0.98	-0.843415	-0.070611	0.843002	-2.23759	1.08318	NA	NA	NA	3.75271	1.11308	-4.93602	1.5	1/ALFmax	6.8
B.6	PDI3	3408.58	0.07624	0.98	-0.487329	-0.061898	0.356272	-1.28936	0.374111	0.431518	-2.22849	0.845664	3.75271	0.886195	-4.42452	1.5	1/ALFmax	6.8
C.1	VGM1	4039.37	0.002281	0.97	-0.779685	-0.347949	NA	NA	NA	NA	NA	NA	3.8194	1.4815	NA	1.5	1/ALFmax	6.8
C.1	VGM2	3151.43	0.06408	0.97	-2.11923	0.320669	0.371894	-0.834189	0.183669	NA	NA	NA	3.8194	-0.31747	NA	1.5	1/ALFmax	6.8
C.1	VGM3	2990.63	0.067534	0.97	-0.747122	0.415428	0.42497	-1.39748	-0.1297	0.413077	-2.24702	0.860298	3.8194	0.462439	NA	1.5	1/ALFmax	6.8
C.1	PDI1	4042.97	0.023203	0.97	-0.774016	-0.339524	NA	NA	NA	NA	NA	NA	3.8194	1.42378	-6.61283	1.5	1/ALFmax	6.8
C.1	PDI2	2498.3	0.134923	0.97	-2.13801	0.448475	0.326227	-0.840976	0.170741	NA	NA	NA	3.8194	0.566086	-4.76121	1.5	1/ALFmax	6.8
C.1	PDI3	1856.15	0.143784	0.97	-0.764664	0.467733	0.477176	-1.47754	0.058165	0.312506	-2.2394	0.704431	3.8194	0.586692	-4.6379	1.5	1/ALFmax	6.8
C.2	VGM1	6876.19	0.000725	0.98	-1.24706	-0.183119	NA	NA	NA	NA	NA	NA	3.39965	2.28027	NA	1.5	1/ALFmax	6.8
C.2	VGM2	6137.03	0.004275	0.98	-2.2813	0.769832	0.168607	-1.132	-0.129228	NA	NA	NA	3.39965	0.728537	NA	1.5	1/ALFmax	6.8
C.2	VGM3	6028.49	0.0067	0.98	-1.20131	0.064801	0.673333	-1.52822	-0.536817	0.13836	-2.29089	0.986502	3.39965	0.505596	NA	1.5	1/ALFmax	6.8
C.2	PDI1	6605.6	0.001863	0.98	-1.27859	-0.164407	NA	NA	NA	NA	NA	NA	3.39965	2.6462	-5.46505	1.5	1/ALFmax	6.8
C.2	PDI2	5561.92	0.070533	0.98	-2.24274	0.556424	0.203127	-1.13801	-0.04362	NA	NA	NA	3.39965	2.03568	-4.86162	1.5	1/ALFmax	6.8
C.2	PDI3	5588.67	0.068969	0.98	-1.20054	0.100078	0.712554	-2.19142	-0.43814	0.050463	-2.23203	0.527825	3.39965	2.37881	-4.93215	1.5	1/ALFmax	6.8
C.3	VGM1	6211.76	0.000221	0.98	-0.876929	-0.256287	NA	NA	NA	NA	NA	NA	3.64114	1.75012	NA	1.5	1/ALFmax	6.8
C.3	VGM2	5164.04	0.002452	0.98	-2.2604	1.11521	0.163399	-0.876121	-0.105601	NA	NA	NA	3.64114	-1.26449	NA	1.5	1/ALFmax	6.8
C.3	VGM3	4592.24	0.037043	0.98	-0.546938	-0.043487	0.327123	-1.24771	0.291968	0.443549	-2.24055	0.885787	3.64114	-0.796667	NA	1.5	1/ALFmax	6.8
C.3	PDI1	6212.72	0.000291	0.98	-0.876455	-0.256775	NA	NA	NA	NA	NA	NA	3.64114	1.75136	-8.10834	1.5	1/ALFmax	6.8
C.3	PDI2	4391.01	0.051794	0.98	-2.24467	1.06715	0.168922	-0.876818	-0.053436	NA	NA	NA	3.64114	1.05583	-4.84215	1.5	1/ALFmax	6.8
C.3	PDI3	3593.84	0.057851	0.98	-0.685155	-0.106402	0.515887	-1.27205	0.391118	0.283993	-2.23595	0.952562	3.64114	0.922346	-4.57956	1.5	1/ALFmax	6.8
D.1	VGM1	4291.98	0.000813	0.97	-1.0003	-0.242337	NA	NA	NA	NA	NA	NA	3.80239	1.91979	NA	1.5	1/ALFmax	6.8
D.1	VGM2	3809.23	0.028355	0.97	-2.24364	0.543313	0.281268	-1.06751	0.129466	NA	NA	NA	3.80239	-0.175962	NA	1.5	1/ALFmax	6.8
D.1	VGM3	3791.48	0.004177	0.97	-1.07385	0.154719	0.633427	-1.16257	-0.440695	0.140161	-2.2611	0.730828	3.80239	-0.772521	NA	1.5	1/ALFmax	6.8
D.1	PDI1	4201.18	0.005819	0.97	-1.09251	-0.185364	NA	NA	NA	NA	NA	NA	3.80239	2.05583	-5.6403	1.5	1/ALFmax	6.8
D.1	PDI2	2546.89	0.093692	0.97	-2.22341	0.639909	0.242457	-1.0678	0.134523	NA	NA	NA	3.80239	1.24356	-5.2122	1.5	1/ALFmax	6.8
D.1	PDI3	2362.07	0.087461	0.97	-1.01455	0.284612	0.535115	-1.46438	-0.027371	0.276109	-2.24104	0.806322	3.80239	1.36107	-5.13959	1.5	1/ALFmax	6.8
D.2	VGM1	7214.05	0.000705	0.98	-1.34957	-0.219868	NA	NA	NA	NA	NA	NA	3.15394	1.12457	NA	1.5	1/ALFmax	6.8
D.2	VGM2	6642.32	0.002775	0.98	-0.603717	-0.417827	0.495448	-1.68343	0.026752	NA	NA	NA	3.15394	0.28671	NA	1.5	1/ALFmax	6.8
D.2	VGM3	4935.82	3.4e-05	0.98	0.040931	-0.748096	0.350414	-1.43964	0.29623	0.458728	-2.29127	0.810203	3.15394	-1.1686	NA	1.5	1/ALFmax	6.8
D.2	PDI1	6972.04	0.010228	0.98	-1.31206	-0.250002	NA	NA	NA	NA	NA	NA	3.15394	2.28189	-5.29185	1.5	1/ALFmax	6.8
D.2	PDI2	5793.61	0.041081	0.98	-1.70564	0.000253	0.567966	-0.631228	-0.311498	NA	NA	NA	3.15394	1.34186	-3.69886	1.5	1/ALFmax	6.8
D.2	PDI3	3209.24	0.002828	0.98	-0.288612	-0.630905	0.373355	-1.43509	0.425914	0.362108	-2.23694	0.442994	3.15394	0.454104	-3.28274	1.5	1/ALFmax	6.8
D.3	VGM1	5775.83	0.001251	0.96	-1.2643	-0.253378	NA	NA	NA	NA	NA	NA	3.36417	1.34467	NA	1.5	1/ALFmax	6.8
D.3	VGM2	5514.22	0.024465	0.96	-1.05416	-0.229771	0.785105	-2.10285	0.249962	NA	NA	NA	3.36417	-1.06073	NA	1.5	1/ALFmax	6.8
D.3	VGM3	4587.38	0.002509	0.96	-0.33435	-0.684208	0.396914	-1.43282	0.312881	0.438156	-2.27913	0.768616	3.36417	-0.415158	NA	1.5	1/ALFmax	6.8
D.3	PDI1	5139.98	0.018378	0.96	-1.2696	-0.252709	NA	NA	NA	NA	NA	NA	3.36417	2.50891	-4.85252	1.5	1/ALFmax	6.8
D.3	PDI2	4514.79	0.056491	0.96	-1.60508	-0.054627	0.576633	-0.760587	-0.288947	NA	NA	NA	3.36417	1.79078	-3.90048	1.5	1/ALFmax	6.8
D.3	PDI3	1727.41	0.000332	0.96	-0.412588	-0.680192	0.375442	-1.40165	0.347429	0.399159	-2.23249	0.40729	3.36417	0.987534	-3.4382	1.5	1/ALFmax	6.8
E.1	VGM1	4635.4	0.000452	0.97	-1.48297	-0.171402	NA	NA	NA	NA	NA	NA	2.93791	1.48253	NA	1.5	1/ALFmax	6.8
E.1	VGM2	4470.08	0.042848	0.97	-1.28385	-0.044846	0.619674	-2.08705	0.078757	NA	NA	NA	2.93791	0.808074	NA	1.5	1/ALFmax	6.8
E.1	VGM3	2906.49	0.000167	0.97	-1.40967	0.145191	0.558176	-1.01038	-0.864122	0.238792	-2.30875	0.744891	2.93791	0.591006	NA	1.5	1/ALFmax	6.8
E.1	PDI1	4146.33	0.004483	0.97	-1.49693	-0.161029	NA	NA	NA	NA	NA	NA	2.93791	2.319	-4.67357	1.5	1/ALFmax	6.8
E.1	PDI2	3272.86	0.080214	0.97	-1.31014	-0.068296	0.704965	-2.16262	0.197697	NA	NA	NA	2.93791	1.64241	-4.41033	1.5	1/ALFmax	6.8
E.1	PDI3	1724.43	0.060444	0.97	-1.34962	0.051885	0.612446	-1.81182	-0.322956	0.218542	-2.31227	0.669823	2.93791	1.69276	-4.52062	1.5	1/ALFmax	6.8
E.2	VGM1	5444.35	0.001586	0.96	-1.41221	-0.16579	NA	NA	NA	NA	NA	NA	2.97996	2.24986	NA	1.5	1/ALFmax	6.8
E.2	VGM2	5419.66	0.000375	0.96	-1.68018	-0.270248	0.460648	-1.36953	0.041602	NA	NA	NA	2.97996	2.61519	NA	1.5	1/ALFmax	6.8
E.2	VGM3	5547.88	0.000138	0.96	-1.40939	0.159198	0.673368	-2.32808	0.611626	0.249258	-3.42625	0.373961	2.97996	0.991948	NA	1.5	1/ALFmax	6.8
E.2	PDI1	4487.4	0.026545	0.96	-1.46386	-0.112488	NA	NA	NA	NA	NA	NA	2.97996	2.70607	-5.15152	1.5	1/ALFmax	6.8
E.2	PDI2	3375.18	0.081031	0.96	-2.18436	0.187262	0.393533	-1.3669	0.241699	NA	NA	NA	2.97996	2.90872	-4.82716	1.5	1/ALFmax	6.8
E.2	PDI3	2418.48	0.116309	0.96	-1.39432	0.239304	0.671386	-2.19644	0.138848	0.148809	-2.27724	0.604797	2.97996	2.3183	-4.88815	1.5	1/ALFmax	6.8
E.3	VGM1	6134.33	0.003567	0.96	-1.21746	-0.317403	NA	NA	NA	NA	NA	NA	3.43026	1.42408	NA	1.5	1/ALFmax	6.8
E.3	VGM2	5276.12	5.7e-05	0.96	0.143929	-0.712463	0.246171	-1.40568	-0.155561	NA	NA	NA	3.43026	-0.518293	NA	1.5	1/ALFmax	6.8
E.3	VGM3	4830.03	4e-05	0.96	-0.345265	-0.668724	0.517743	-1.47402	0.339306	0.340302	-2.26304	0.736735	3.43026	-0.34783	NA	1.5	1/ALFmax	6.8
E.3	PDI1	5399.71	0.025161	0.96	-1.21695	-0.3236	NA	NA	NA	NA	NA	NA	3.43026	2.97322	-4.8989	1.5	1/ALFmax	6.8
E.3	PDI2	4338.72	0.033762	0.96	-1.53699	-0.107418	0.549395	-0.606949	-0.487007	NA	NA	NA	3.43026	1.87258	-3.81263	1.5	1/ALFmax	6.8
E.3	PDI3	2684.45	2.1e-05	0.96	-0.203536	-0.792504	0.422324	-1.38752	0.425374	0.317368	-2.12152	0.23253	3.43026	0.456774	-3.31321	1.5	1/ALFmax	6.8
G.1	VGM1	4627.91	0.005743	0.98	-1.50126	-0.077399	NA	NA	NA	NA	NA	NA	3.00986	0.660399	NA	1.5	1/ALFmax	6.8
G.1	VGM2	3941.88	0.075774	0.98	-2.17918	0.311219	0.401718	-1.42124	0.390798	NA	NA	NA	3.00986	0.048176	NA	1.5	1/ALFmax	6.8
G.1	VGM3	2924.74	0.072425	0.98	-1.44332	0.29598	0.620538	-1.57279	-0.248904	0.145232	-2.30289	0.723807	3.00986	0.113031	NA	1.5	1/ALFmax	6.8
G.1	PDI1	4496.05	0.019975	0.98	-1.50727	-0.062762	NA	NA	NA	NA	NA	NA	3.00986	1.27586	-4.90647	1.5	1/ALFmax	6.8
G.1	PDI2	3136.94	0.111051	0.98	-2.2328	0.41087	0.349834	-1.42659	0.348923	NA	NA	NA	3.00986	1.12858	-4.17748	1.5	1/ALFmax	6.8
G.1	PDI3	1966.4	0.096509	0.98	-1.42849	0.306547	0.645432	-2.04244	0.016218	0.176395	-2.30783	0.868312	3.00986	1.0747	-4.22399	1.5	1/ALFmax	6.8
G.2	VGM1	3878.62	0.016123	0.97	-1.46225	-0.113092	NA	NA	NA	NA	NA	NA	3.18606	1.01425	NA	1.5	1/ALFmax	6.8
G.2	VGM2	3168.45	0.045111	0.97	-2.10933	0.088192	0.479425	-1.38326	0.394226	NA	NA	NA	3.18606	-0.370375	NA	1.5	1/ALFmax	6.8
G.2	VGM3	2838.27	0.001981	0.97	-1.41933	0.294001	0.58346	-1.79387	-0.646758	0.203424	-2.27067	0.558507	3.18606	0.190677	NA	1.5	1/ALFmax	6.8
G.2	PDI1	3761.12	0.038881	0.97	-1.4688	-0.094347	NA	NA	NA	NA	NA	NA	3.18606	1.24314	-5.09166	1.5	1/ALFmax	6.8
G.2	PDI2	2533.99	0.09423	0.97	-2.14983	0.156675	0.428124	-1.38955	0.37258	NA	NA	NA	3.18606	1.48409	-4.76593	1.5	1/ALFmax	6.8
G.2	PDI3	2347.74	0.064598	0.97	-1.39752	0.343059	0.58455	-2.07808	-0.379749	0.136413	-2.20515	0.354531	3.18606	1.37766	-4.75465	1.5	1/ALFmax	6.8
G.3	VGM1	4805.73	0.000624	0.97	-1.44119	-0.124772	NA	NA	NA	NA	NA	NA	2.86765	1.17125	NA	1.5	1/ALFmax	6.8
G.3	VGM2	4623.75	0.0023	0.97	-1.44573	0.440178	0.547642	-2.20676	0.13885	NA	NA	NA	2.86765	0.390276	NA	1.5	1/ALFmax	6.8
G.3	VGM3	3689.92	2.2e-05	0.97	-1.50769	0.412676	0.555626	-0.856457	-0.774014	0.262203	-2.29451	0.829326	2.86765	0.290755	NA	1.5	1/ALFmax	6.8
G.3	PDI1	4193.8	0.028993	0.97	-1.47532	-0.081409	NA	NA	NA	NA	NA	NA	2.86765	1.85908	-4.66481	1.5	1/ALFmax	6.8
G.3	PDI2	2549.06	0.101206	0.97	-2.28263	0.366048	0.330337	-1.45862	0.364545	NA	NA	NA	2.86765	1.88498	-4.5319	1.5	1/ALFmax	6.8
G.3	PDI3	2102	0.054736	0.97	-1.46369	0.355896	0.602956	-1.8122	-0.298345	0.217134	-2.32343	0.704029	2.86765	1.8488	-4.67143	1.5	1/ALFmax	6.8
G.4	VGM1	3780.07	0.013306	0.96	-1.42188	-0.108061	NA	NA	NA	NA	NA	NA	2.87602	0.004173	NA	1.5	1/ALFmax	6.8
G.4	VGM2	3173.43	0.072503	0.99	-1.33183	0.415288	0.518507	-2.04078	0.141672	NA	NA	NA	2.87602	-0.424044	NA	1.5	1/ALFmax	6.8
G.4	VGM3	2166.27	1e-06	0.96	-1.37612	0.340603	0.547782	-1.66447	-0.594056	0.221049	-2.2263	0.582904	2.87602	-0.374921	NA	1.5	1/ALFmax	6.8
G.4	PDI1	3723.63	0.037566	0.99	-1.43239	-0.081742	NA	NA	NA	NA	NA	NA	2.87602	-0.757	-5.96775	1.5	1/ALFmax	6.8
G.4	PDI2	2544.31	0.132724	0.96	-1.36921	0.425732	0.60866	-2.16329	0.352348	NA	NA	NA	2.87602	-1.28026	-6.87163	1.5	1/ALFmax	6.8
G.4	PDI3	2259.93	0.107918	0.99	-1.37368	0.337854	0.627618	-2.02723	-0.096162	0.163506	-2.23891	0.697407	2.87602	-0.636527	-4.71565	1.5	1/ALFmax	6.8
H.1	VGM1	4303.2	9.8e-05	0.96	-1.44099	-0.120439	NA	NA	NA	NA	NA	NA	2.8956	1.00487	NA	1.5	1/ALFmax	6.8
H.1	VGM2	4116.66	0.016964	0.99	-1.30608	-0.119793	0.851288	-2.15579	0.345482	NA	NA	NA	2.8956	0.553809	NA	1.5	1/ALFmax	6.8
H.1	VGM3	3292.84	0.000516	0.96	-1.38124	0.213438	0.59721	-1.41457	-0.742602	0.199494	-2.27532	0.789218	2.8956	0.483586	NA	1.5	1/ALFmax	6.8
H.1	PDI1	4029.2	0.014994	0.99	-1.45372	-0.10321	NA	NA	NA	NA	NA	NA	2.8956	1.51278	-4.83755	1.5	1/ALFmax	6.8
H.1	PDI2	3488.02	0.063078	0.96	-1.29267	-0.036869	0.787547	-2.19461	0.34354	NA	NA	NA	2.8956	0.948174	-4.46956	1.5	1/ALFmax	6.8
H.1	PDI3	2639.94	0.068713	0.99	-1.34951	0.062448	0.752011	-2.10055	-0.426414	-2.64761	-2.28049	0.888147	2.8956	0.787288	-4.50171	1.5	1/ALFmax	6.8
H.2	VGM1	4259.5	0.013089		-1.48354	-0.068517	NA	NA	NA	NA	NA	NA	3.03021	-0.569912	NA	1.5	1/ALFmax	6.8
H.2	VGM2	4078.81	0.011341		-1.29153	0.203362	0.40683	-1.80425	-0.052622	NA	NA	NA	3.03021	0.376817	NA	1.5	1/ALFmax	6.8
H.2	VGM3	2632.11	0.029298		-1.39377	0.346688	0.557644	-1.88821	-0.22899	0.255727	-2.25299	0.741912	3.03021	-0.271092	NA	1.5	1/ALFmax	6.8
H.2	PDI1	4198.14	0.016574		-1.47482	-0.075749	NA	NA	NA	NA	NA	NA	3.03021	0.738194	-4.68616	1.5	1/ALFmax	6.8
H.2	PDI2	3134.15	0.12179		-2.1726	0.376777	0.381485	-1.38759	0.394685	NA	NA	NA	3.03021	0.000897	-4.91348	1.5	1/ALFmax	6.8
H.2	PDI3	2162.28	0.032019		-1.40512	0.311323	0.602477	-2.0093	-0.349667	0.192761	-2.24714	0.719789	3.03021	0.565456	-4.75071	1.5	1/ALFmax	6.8
H.3	VGM1	4611.68	0.002263		-1.49724	-0.053245	NA	NA	NA	NA	NA	NA	2.78233	0.6241	NA	1.5	1/ALFmax	6.8
H.3	VGM2	4218.3	0.056186		-2.13326	0.261992	0.440282	-1.39897	0.433081	NA	NA	NA	2.78233	0.156773	NA	1.5	1/ALFmax	6.8
H.3	VGM3	3147.62	0.048589		-1.45018	0.325308	0.615525	-1.05058	-0.560599	0.14538	-2.27529	0.798169	2.78233	0.024291	NA	1.5	1/ALFmax	6.8
H.3	PDI1	4394.06	0.014751		-1.50087	-0.042426	NA	NA	NA	NA	NA	NA	2.78233	1.25963	-4.54717	1.5	1/ALFmax	6.8
H.3	PDI2	3856.9	0.068947		-1.39454	0.421737	0.558981	-2.12141	0.220823	NA	NA	NA	2.78233	1.2644	-4.48308	1.5	1/ALFmax	6.8
H.3	PDI3	1724.15	0.01956		-1.42996	0.314974	0.593692	-1.73344	-0.425049	0.207443	-2.27586	0.830562	2.78233	1.12261	-4.44701	1.5	1/ALFmax	6.8
H.4	VGM1	5233.07	0.000175		-1.39098	-0.165688	NA	NA	NA	NA	NA	NA	3.07314	1.93135	NA	1.5	1/ALFmax	6.8
H.4	VGM2	5037.29	0.000958		-2.17772	0.153521	0.463014	-1.36663	0.379793	NA	NA	NA	3.07314	1.93351	NA	1.5	1/ALFmax	6.8
H.4	VGM3	4721.96	0.000547		-1.40564	0.288221	0.597178	-1.29339	-0.70648	0.146133	-2.30387	0.701532	3.07314	0.054748	NA	1.5	1/ALFmax	6.8
H.4	PDI1	4945.98	0.000552		-1.41404	-0.147923	NA	NA	NA	NA	NA	NA	3.07314	2.27368	-5.2533	1.5	1/ALFmax	6.8
H.4	PDI2	2601.09	0.102264		-2.28405	0.564233	0.311258	-1.39085	0.279224	NA	NA	NA	3.07314	1.7008	-4.6725	1.5	1/ALFmax	6.8
H.4	PDI3	2444.78	0.078871		-1.3868	0.27956	0.634332	-1.7727	-0.209385	0.133249	-2.29888	0.765106	3.07314	1.69273	-4.72117	1.5	1/ALFmax	6.8
