# Supplementary material for: A pore-size classification for peat bogs derived from unsaturated hydraulic properties
Source: Copernicus journal article supplement (doi:10.5194/hess-21-6185-2017), 2017-12-07
Supplement: Supplementary file 1 [file hess-21-6185-2017-supplement.zip]

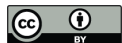

## *Supplement of*

# **A pore-size classification for peat bogs derived from unsaturated hydraulic properties**

**Tobias Karl David Weber et al.**

*Correspondence to:* Tobias Karl David Weber ([tobias.weber@uni-hohenheim.de](mailto:tobias.weber@uni-hohenheim.de))

- [hess-21-6185-2017-supplement-title-page.pdf](#)
- [Supplementary Information 1.zip](#)
- [Supplementary Information 2.zip](#)

The copyright of individual parts of the supplement might differ from the CC BY 3.0 License.
