# Supplementary material for: A pore-size classification for peat bogs derived from unsaturated hydraulic properties
Source: Copernicus journal article supplement (doi:10.5194/hess-21-6185-2017), 2017-12-07
Supplement: Supplementary file 2 [file B1_HYDRUS.xlsx]

## Sheet: Gewicht
Datum / Zeit	Brutto-Gewicht [g]	Netto-Gewicht [g]	Gewichtsänderung [g]	Zeit [d]	Theta [-]	Verdunstungsrate [cm/d]		Volumen	238
2012-10-28 16:27:28	815.52	240.62	0		-135.195			Höhe	5
2012-10-29 07:46:38	804.62	229.72	-10.9	0.63831	-135.241	0.358747		A	47.6
2012-10-29 17:50:03	797.51	222.61	-18.01	1.05735	-135.271	0.356458		Theta0	-135.195
2012-10-30 07:56:53	788.68	213.78	-26.84	1.64543	-135.308	0.315441		Trockengewicht	10.88
2012-10-30 20:36:48	781.53	206.63	-33.99	2.17315	-135.338	0.28464		Ks (as in Ksat)
2012-10-31 08:46:12	774.65	199.75	-40.87	2.67968	-135.367	0.28535		delta System [g]	574.9
2012-10-31 11:24:07	773.14	198.24	-42.38	2.78934	-135.373	0.289271
2012-11-01 08:01:59	761.31	186.41	-54.21	3.64897	-135.423	0.289112
2012-11-01 17:08:12	755.86	180.96	-59.66	4.02829	-135.446	0.301847
2012-11-02 10:54:55	744.34	169.44	-71.18	4.76906	-135.494	0.326707
2012-11-02 20:12:27	738.74	163.84	-76.78	5.15624	-135.517	0.303859
2012-11-03 10:26:04	729.49	154.59	-86.03	5.74903	-135.556	0.327819
2012-11-03 18:28:33	724.74	149.84	-90.78	6.08409	-135.576	0.297829
2012-11-04 11:21:13	714.72	139.82	-100.8	6.78733	-135.618	0.299334
2012-11-04 19:30:16	710.34	135.44	-105.18	7.12694	-135.637	0.270942
2012-11-05 11:09:56	701.91	127.01	-113.61	7.77949	-135.672	0.2714
2012-11-05 20:07:38	697.11	122.21	-118.41	8.15289	-135.692	0.270058
2012-11-06 11:28:12	689.38	114.48	-126.14	8.79218	-135.725	0.254027
2012-11-06 20:55:41	684.27	109.37	-131.25	9.18626	-135.746	0.27241
2012-11-07 10:02:08	677.82	102.92	-137.7	9.73241	-135.773	0.24811
2012-11-07 18:53:49	673.74	98.84	-141.78	10.1016	-135.791	0.232147
2012-11-08 10:04:52	666.16	91.26	-149.36	10.7343	-135.822	0.2517
2012-11-08 18:33:28	661.98	87.08	-153.54	11.0875	-135.84	0.248631
2012-11-09 08:30:46	654.89	79.99	-160.63	11.669	-135.87	0.256166
2012-11-10 22:11:09	637.79	62.89	-177.73	13.2387	-135.942	0.22886
2012-11-11 13:46:44	632.89	57.99	-182.63	13.8884	-135.962	0.158442
2012-11-11 18:29:25	631.4	56.5	-184.12	14.0847	-135.968	0.159456
2012-11-12 09:53:48	626.74	51.84	-188.78	14.7266	-135.988	0.152507
2012-11-12 15:31:11	624.97	50.07	-190.55	14.9609	-135.996	0.15871
2012-11-13 08:57:14	619.74	44.84	-195.78	15.6873	-136.017	0.151253
2012-11-13 16:25:38	617.67	42.77	-197.85	15.9987	-136.026	0.139656
2012-11-15 10:53:28	607.07	32.17	-208.45	17.7681	-136.071	0.125861
2012-11-16 03:19:39	602.967	28.0671		18.4529	-136.088	0.125861

## Sheet: Tensionen
Datum / Zeit	Tension unten [hPa]	Tension oben [hPa]		Zeit [d]	MP bot(2) [cm]	MP top(1) [cm]		WÄGUNG START
2012-10-26 17:39:39	1.19	3.85		-1.94987	-1.21305	-3.92457		41210.7	-4.93374
2012-10-26 17:40:39	1.55	4.84		-1.94918	-1.58002	-4.93374		2013-08-25 09:29:15
2012-10-26 17:41:39	1.27	3.93		-1.94848	-1.2946	-4.00612
2012-10-26 17:42:39	1.26	3.92		-1.94779	-1.2844	-3.99592
2012-10-26 17:43:39	1.25	3.92		-1.94709	-1.27421	-3.99592
2012-10-26 17:44:39	1.25	3.92		-1.9464	-1.27421	-3.99592
2012-10-26 17:45:39	1.25	3.91		-1.94571	-1.27421	-3.98573
2012-10-26 17:46:39	1.25	3.91		-1.94501	-1.27421	-3.98573
2012-10-26 17:47:39	1.24	3.91		-1.94432	-1.26402	-3.98573
2012-10-26 17:48:39	1.24	3.91		-1.94362	-1.26402	-3.98573
2012-10-26 17:49:39	1.25	3.91		-1.94293	-1.27421	-3.98573
2012-10-26 17:50:39	1.25	3.92		-1.94223	-1.27421	-3.99592
2012-10-26 17:51:39	1.24	3.9		-1.94154	-1.26402	-3.97554
2012-10-26 17:52:39	1.25	3.92		-1.94084	-1.27421	-3.99592
2012-10-26 17:53:39	1.22	3.9		-1.94015	-1.24363	-3.97554
2012-10-26 17:54:39	1.23	3.9		-1.93946	-1.25382	-3.97554
2012-10-26 17:55:39	1.23	3.91		-1.93876	-1.25382	-3.98573
2012-10-26 17:56:39	1.23	3.91		-1.93807	-1.25382	-3.98573
2012-10-26 17:57:39	1.24	3.91		-1.93737	-1.26402	-3.98573
2012-10-26 17:58:39	1.24	3.91		-1.93668	-1.26402	-3.98573
2012-10-26 17:59:39	1.25	3.93		-1.93598	-1.27421	-4.00612
2012-10-26 18:00:39	1.23	3.92		-1.93529	-1.25382	-3.99592
2012-10-26 18:01:39	1.23	3.91		-1.93459	-1.25382	-3.98573
2012-10-26 18:02:39	1.23	3.91		-1.9339	-1.25382	-3.98573
2012-10-26 18:03:39	1.24	3.92		-1.93321	-1.26402	-3.99592
2012-10-26 18:04:39	1.24	3.91		-1.93251	-1.26402	-3.98573
2012-10-26 18:05:39	1.23	3.91		-1.93182	-1.25382	-3.98573
2012-10-26 18:06:39	1.23	3.91		-1.93112	-1.25382	-3.98573
2012-10-26 18:07:39	1.24	3.91		-1.93043	-1.26402	-3.98573
2012-10-26 18:08:39	1.24	3.91		-1.92973	-1.26402	-3.98573
2012-10-26 18:09:39	1.24	3.92		-1.92904	-1.26402	-3.99592
2012-10-26 18:10:39	1.25	3.92		-1.92834	-1.27421	-3.99592
2012-10-26 18:11:39	1.25	3.92		-1.92765	-1.27421	-3.99592
2012-10-26 18:12:39	1.25	3.93		-1.92696	-1.27421	-4.00612
2012-10-26 18:13:39	1.25	3.92		-1.92626	-1.27421	-3.99592
2012-10-26 18:14:39	1.24	3.93		-1.92557	-1.26402	-4.00612
2012-10-26 18:15:39	1.24	3.93		-1.92487	-1.26402	-4.00612
2012-10-26 18:16:39	1.24	3.91		-1.92418	-1.26402	-3.98573
2012-10-26 18:17:39	1.24	3.93		-1.92348	-1.26402	-4.00612
2012-10-26 18:18:39	1.24	3.93		-1.92279	-1.26402	-4.00612
2012-10-26 18:19:39	1.24	3.92		-1.92209	-1.26402	-3.99592
2012-10-26 18:20:39	1.23	3.93		-1.9214	-1.25382	-4.00612
2012-10-26 18:21:39	1.24	3.9		-1.92071	-1.26402	-3.97554
2012-10-26 18:22:39	1.24	3.93		-1.92001	-1.26402	-4.00612
2012-10-26 18:23:39	1.24	3.93		-1.91932	-1.26402	-4.00612
2012-10-26 18:24:39	1.24	3.93		-1.91862	-1.26402	-4.00612
2012-10-26 18:25:39	1.26	3.94		-1.91793	-1.2844	-4.01631
2012-10-26 18:26:39	1.26	3.95		-1.91723	-1.2844	-4.0265
2012-10-26 18:27:39	1.26	3.95		-1.91654	-1.2844	-4.0265
2012-10-26 18:28:39	1.25	3.95		-1.91584	-1.27421	-4.0265
2012-10-26 18:29:39	1.26	3.95		-1.91515	-1.2844	-4.0265
2012-10-26 18:30:39	1.24	3.94		-1.91446	-1.26402	-4.01631
2012-10-26 18:31:39	1.25	3.94		-1.91376	-1.27421	-4.01631
2012-10-26 18:32:39	1.25	3.92		-1.91307	-1.27421	-3.99592
2012-10-26 18:33:39	1.26	3.95		-1.91237	-1.2844	-4.0265
2012-10-26 18:34:39	1.27	3.96		-1.91168	-1.2946	-4.0367
2012-10-26 18:35:39	1.27	3.97		-1.91098	-1.2946	-4.04689
2012-10-26 18:36:39	1.26	3.96		-1.91029	-1.2844	-4.0367
2012-10-26 18:37:39	1.27	3.94		-1.90959	-1.2946	-4.01631
2012-10-26 18:38:39	1.27	3.97		-1.9089	-1.2946	-4.04689
2012-10-26 18:39:39	1.27	3.95		-1.90821	-1.2946	-4.0265
2012-10-26 18:49:39	1.29	3.98		-1.90126	-1.31498	-4.05708
2012-10-26 18:59:39	1.31	4.02		-1.89432	-1.33537	-4.09786
2012-10-26 19:09:39	1.32	4.04		-1.88737	-1.34557	-4.11825
2012-10-26 19:19:39	1.35	4.06		-1.88043	-1.37615	-4.13863
2012-10-26 19:29:39	1.37	4.07		-1.87348	-1.39653	-4.14883
2012-10-26 19:39:39	1.39	4.12		-1.86654	-1.41692	-4.1998
2012-10-26 19:49:39	1.4	4.13		-1.85959	-1.42712	-4.20999
2012-10-26 19:59:39	1.43	4.14		-1.85265	-1.4577	-4.22018
2012-10-26 20:09:39	1.44	4.16		-1.84571	-1.46789	-4.24057
2012-10-26 20:19:39	1.46	4.17		-1.83876	-1.48828	-4.25076
2012-10-26 20:29:39	1.46	4.18		-1.83182	-1.48828	-4.26096
2012-10-26 20:39:39	1.48	4.2		-1.82487	-1.50866	-4.28135
2012-10-26 20:49:39	1.52	4.27		-1.81793	-1.54944	-4.3527
2012-10-26 20:59:39	1.51	4.23		-1.81098	-1.53925	-4.31193
2012-10-26 21:09:39	1.54	4.26		-1.80404	-1.56983	-4.34251
2012-10-26 21:19:39	1.58	4.3		-1.79709	-1.6106	-4.38328
2012-10-26 21:29:39	1.6	4.31		-1.79015	-1.63099	-4.39348
2012-10-26 21:39:39	1.62	4.36		-1.78321	-1.65138	-4.44444
2012-10-26 21:49:39	1.65	4.36		-1.77626	-1.68196	-4.44444
2012-10-26 21:59:39	1.65	4.39		-1.76932	-1.68196	-4.47503
2012-10-26 22:09:39	1.68	4.43		-1.76237	-1.71254	-4.5158
2012-10-26 22:19:39	1.71	4.45		-1.75543	-1.74312	-4.53619
2012-10-26 22:29:39	1.74	4.48		-1.74848	-1.7737	-4.56677
2012-10-26 22:39:39	1.76	4.5		-1.74154	-1.79409	-4.58716
2012-10-26 22:49:39	1.78	4.53		-1.73459	-1.81448	-4.61774
2012-10-26 22:59:39	1.81	4.56		-1.72765	-1.84506	-4.64832
2012-10-26 23:09:39	1.77	4.51		-1.72071	-1.80428	-4.59735
2012-10-26 23:19:39	1.79	4.55		-1.71376	-1.82467	-4.63812
2012-10-26 23:29:39	1.83	4.57		-1.70682	-1.86544	-4.65851
2012-10-26 23:39:39	1.84	4.6		-1.69987	-1.87564	-4.68909
2012-10-26 23:49:39	1.87	4.61		-1.69293	-1.90622	-4.69929
2012-10-26 23:59:39	1.88	4.64		-1.68598	-1.91641	-4.72987
2012-10-27 00:09:39	1.9	4.65		-1.67904	-1.9368	-4.74006
2012-10-27 00:19:39	1.92	4.68		-1.67209	-1.95719	-4.77064
2012-10-27 00:29:39	1.94	4.7		-1.66515	-1.97757	-4.79103
2012-10-27 00:39:39	1.95	4.72		-1.65821	-1.98777	-4.81142
2012-10-27 00:49:39	1.97	4.74		-1.65126	-2.00815	-4.8318
2012-10-27 00:59:39	1.97	4.74		-1.64432	-2.00815	-4.8318
2012-10-27 01:09:39	2	4.77		-1.63737	-2.03874	-4.86239
2012-10-27 01:19:39	2.01	4.79		-1.63043	-2.04893	-4.88277
2012-10-27 01:29:39	2.04	4.82		-1.62348	-2.07951	-4.91335
2012-10-27 01:39:39	2.06	4.83		-1.61654	-2.0999	-4.92355
2012-10-27 01:49:39	2.03	4.81		-1.60959	-2.06932	-4.90316
2012-10-27 01:59:39	2.09	4.86		-1.60265	-2.13048	-4.95413
2012-10-27 02:09:39	2.11	4.88		-1.59571	-2.15087	-4.97452
2012-10-27 02:19:39	2.02	4.8		-1.58876	-2.05912	-4.89297
2012-10-27 02:29:39	1.99	4.78		-1.58182	-2.02854	-4.87258
2012-10-27 02:39:39	2.06	4.84		-1.57487	-2.0999	-4.93374
2012-10-27 02:49:39	2.09	4.88		-1.56793	-2.13048	-4.97452
2012-10-27 02:59:39	2.13	4.91		-1.56098	-2.17125	-5.0051
2012-10-27 03:09:39	2.14	4.93		-1.55404	-2.18145	-5.02548
2012-10-27 03:19:39	2.17	4.95		-1.54709	-2.21203	-5.04587
2012-10-27 03:29:39	2.19	4.97		-1.54015	-2.23242	-5.06626
2012-10-27 03:39:39	2.21	5		-1.53321	-2.2528	-5.09684
2012-10-27 03:49:39	2.22	5		-1.52626	-2.263	-5.09684
2012-10-27 03:59:39	2.24	5.02		-1.51932	-2.28338	-5.11723
2012-10-27 04:09:39	2.25	5.04		-1.51237	-2.29358	-5.13761
2012-10-27 04:19:39	2.28	5.07		-1.50543	-2.32416	-5.1682
2012-10-27 04:29:39	2.3	5.09		-1.49848	-2.34455	-5.18858
2012-10-27 04:39:39	2.31	5.11		-1.49154	-2.35474	-5.20897
2012-10-27 04:49:39	2.34	5.13		-1.48459	-2.38532	-5.22936
2012-10-27 04:59:39	2.36	5.14		-1.47765	-2.40571	-5.23955
2012-10-27 05:09:39	2.36	5.16		-1.47071	-2.40571	-5.25994
2012-10-27 05:19:39	2.38	5.17		-1.46376	-2.4261	-5.27013
2012-10-27 05:29:39	2.41	5.2		-1.45682	-2.45668	-5.30071
2012-10-27 05:39:39	2.42	5.21		-1.44987	-2.46687	-5.31091
2012-10-27 05:49:39	2.44	5.24		-1.44293	-2.48726	-5.34149
2012-10-27 05:59:39	2.45	5.25		-1.43598	-2.49745	-5.35168
2012-10-27 06:09:39	2.47	5.27		-1.42904	-2.51784	-5.37207
2012-10-27 06:19:39	2.49	5.29		-1.42209	-2.53823	-5.39246
2012-10-27 06:29:39	2.5	5.3		-1.41515	-2.54842	-5.40265
2012-10-27 06:39:39	2.52	5.31		-1.40821	-2.56881	-5.41284
2012-10-27 06:49:39	2.55	5.34		-1.40126	-2.59939	-5.44343
2012-10-27 06:59:39	2.55	5.36		-1.39432	-2.59939	-5.46381
2012-10-27 07:09:39	2.53	5.33		-1.38737	-2.579	-5.43323
2012-10-27 07:19:39	2.58	5.37		-1.38043	-2.62997	-5.47401
2012-10-27 07:29:39	2.58	5.38		-1.37348	-2.62997	-5.4842
2012-10-27 07:39:39	2.6	5.4		-1.36654	-2.65036	-5.50459
2012-10-27 07:49:39	2.61	5.4		-1.35959	-2.66055	-5.50459
2012-10-27 07:59:39	2.63	5.43		-1.35265	-2.68094	-5.53517
2012-10-27 08:09:39	2.65	5.45		-1.34571	-2.70133	-5.55556
2012-10-27 08:19:39	2.68	5.48		-1.33876	-2.73191	-5.58614
2012-10-27 08:29:39	2.69	5.49		-1.33182	-2.7421	-5.59633
2012-10-27 08:39:39	2.7	5.5		-1.32487	-2.75229	-5.60652
2012-10-27 08:49:39	2.73	5.53		-1.31793	-2.78287	-5.6371
2012-10-27 08:59:39	2.72	5.52		-1.31098	-2.77268	-5.62691
2012-10-27 09:09:39	2.73	5.52		-1.30404	-2.78287	-5.62691
2012-10-27 09:19:39	2.76	5.56		-1.29709	-2.81346	-5.66769
2012-10-27 09:29:39	2.77	5.57		-1.29015	-2.82365	-5.67788
2012-10-27 09:39:39	2.7	5.5		-1.28321	-2.75229	-5.60652
2012-10-27 09:49:39	2.76	5.52		-1.27626	-2.81346	-5.62691
2012-10-27 09:59:39	2.77	5.58		-1.26932	-2.82365	-5.68807
2012-10-27 10:09:39	2.79	5.55		-1.26237	-2.84404	-5.65749
2012-10-27 10:19:39	2.79	5.58		-1.25543	-2.84404	-5.68807
2012-10-27 10:29:39	2.78	5.58		-1.24848	-2.83384	-5.68807
2012-10-27 10:39:39	2.74	5.54		-1.24154	-2.79307	-5.6473
2012-10-27 10:49:39	2.79	5.58		-1.23459	-2.84404	-5.68807
2012-10-27 10:59:39	2.79	5.59		-1.22765	-2.84404	-5.69827
2012-10-27 11:09:39	2.8	5.59		-1.22071	-2.85423	-5.69827
2012-10-27 11:19:39	2.83	5.58		-1.21376	-2.88481	-5.68807
2012-10-27 11:29:39	2.82	5.6		-1.20682	-2.87462	-5.70846
2012-10-27 11:39:39	2.85	5.61		-1.19987	-2.9052	-5.71865
2012-10-27 11:49:39	2.84	5.64		-1.19293	-2.89501	-5.74924
2012-10-27 11:59:39	2.87	5.62		-1.18598	-2.92559	-5.72885
2012-10-27 12:09:39	2.88	5.63		-1.17904	-2.93578	-5.73904
2012-10-27 12:19:39	2.9	5.64		-1.17209	-2.95617	-5.74924
2012-10-27 12:29:39	2.89	5.64		-1.16515	-2.94597	-5.74924
2012-10-27 12:39:39	2.9	5.65		-1.15821	-2.95617	-5.75943
2012-10-27 12:49:39	2.9	5.64		-1.15126	-2.95617	-5.74924
2012-10-27 12:59:39	2.93	5.66		-1.14432	-2.98675	-5.76962
2012-10-27 13:09:39	2.92	5.66		-1.13737	-2.97655	-5.76962
2012-10-27 13:19:39	2.93	5.67		-1.13043	-2.98675	-5.77982
2012-10-27 13:29:39	2.92	5.71		-1.12348	-2.97655	-5.82059
2012-10-27 13:39:39	2.94	5.71		-1.11654	-2.99694	-5.82059
2012-10-27 13:49:39	2.94	5.72		-1.10959	-2.99694	-5.83078
2012-10-27 13:59:39	2.99	5.72		-1.10265	-3.04791	-5.83078
2012-10-27 14:09:39	2.98	5.73		-1.09571	-3.03772	-5.84098
2012-10-27 14:19:39	2.97	5.75		-1.08876	-3.02752	-5.86137
2012-10-27 14:29:39	3	5.73		-1.08182	-3.0581	-5.84098
2012-10-27 14:39:39	2.99	5.75		-1.07487	-3.04791	-5.86137
2012-10-27 14:49:39	2.99	5.75		-1.06793	-3.04791	-5.86137
2012-10-27 14:59:39	3	5.75		-1.06098	-3.0581	-5.86137
2012-10-27 15:09:39	3.02	5.75		-1.05404	-3.07849	-5.86137
2012-10-27 15:19:39	3	5.76		-1.04709	-3.0581	-5.87156
2012-10-27 15:29:39	3.01	5.77		-1.04015	-3.0683	-5.88175
2012-10-27 15:39:39	3	5.74		-1.03321	-3.0581	-5.85117
2012-10-27 15:49:39	2.95	5.7		-1.02626	-3.00714	-5.8104
2012-10-27 15:59:39	2.91	5.66		-1.01932	-2.96636	-5.76962
2012-10-27 16:09:39	3.82	5.03		-1.01237	-3.89399	-5.12742
2012-10-27 16:19:39	2.55	5.25		-1.00543	-2.59939	-5.35168
2012-10-27 16:29:39	-0.55	2.18		-0.998484	0.560652	-2.22222
2012-10-27 16:39:39	-0.47	2.23		-0.991539	0.479103	-2.27319
2012-10-27 16:49:39	-0.39	2.33		-0.984595	0.397554	-2.37513
2012-10-27 16:59:39	-0.36	2.34		-0.97765	0.366972	-2.38532
2012-10-27 17:09:39	-0.3	2.43		-0.970706	0.30581	-2.47706
2012-10-27 17:19:39	-0.2	2.52		-0.963762	0.203874	-2.56881
2012-10-27 17:29:39	-0.23	2.5		-0.956817	0.234455	-2.54842
2012-10-27 17:39:39	-0.2	2.54		-0.949873	0.203874	-2.58919
2012-10-27 17:49:39	-0.17	2.57		-0.942928	0.173293	-2.61978
2012-10-27 17:59:39	-0.1	2.63		-0.935984	0.101937	-2.68094
2012-10-27 18:09:39	-0.12	2.62		-0.929039	0.122324	-2.67074
2012-10-27 18:19:39	-0.09	2.66		-0.922095	0.0917431	-2.71152
2012-10-27 18:29:39	-0.05	2.69		-0.91515	0.0509684	-2.7421
2012-10-27 18:39:39	-0.04	2.7		-0.908206	0.0407747	-2.75229
2012-10-27 18:49:39	0	2.73		-0.901262	0	-2.78287
2012-10-27 18:59:39	0.03	2.75		-0.894317	-0.030581	-2.80326
2012-10-27 19:09:39	0.05	2.77		-0.887373	-0.0509684	-2.82365
2012-10-27 19:19:39	0.07	2.79		-0.880428	-0.0713558	-2.84404
2012-10-27 19:29:39	0.1	2.82		-0.873484	-0.101937	-2.87462
2012-10-27 19:39:39	0.12	2.84		-0.866539	-0.122324	-2.89501
2012-10-27 19:49:39	0.15	2.86		-0.859595	-0.152905	-2.91539
2012-10-27 19:59:39	0.15	2.87		-0.85265	-0.152905	-2.92559
2012-10-27 20:09:39	0.17	2.88		-0.845706	-0.173293	-2.93578
2012-10-27 20:19:39	0.19	2.89		-0.838762	-0.19368	-2.94597
2012-10-27 20:29:39	0.2	2.91		-0.831817	-0.203874	-2.96636
2012-10-27 20:39:39	0.21	2.92		-0.824873	-0.214067	-2.97655
2012-10-27 20:49:39	0.23	2.94		-0.817928	-0.234455	-2.99694
2012-10-27 20:59:39	0.24	2.94		-0.810984	-0.244648	-2.99694
2012-10-27 21:09:39	0.24	2.94		-0.804039	-0.244648	-2.99694
2012-10-27 21:19:39	0.26	2.95		-0.797095	-0.265036	-3.00714
2012-10-27 21:29:39	0.27	2.96		-0.79015	-0.275229	-3.01733
2012-10-27 21:39:39	0.28	2.97		-0.783206	-0.285423	-3.02752
2012-10-27 21:49:39	0.28	2.97		-0.776262	-0.285423	-3.02752
2012-10-27 21:59:39	0.28	2.97		-0.769317	-0.285423	-3.02752
2012-10-27 22:09:39	0.29	2.98		-0.762373	-0.295617	-3.03772
2012-10-27 22:19:39	0.29	2.98		-0.755428	-0.295617	-3.03772
2012-10-27 22:29:39	0.32	2.96		-0.748484	-0.326198	-3.01733
2012-10-27 22:39:39	0.31	2.99		-0.741539	-0.316004	-3.04791
2012-10-27 22:49:39	0.31	3		-0.734595	-0.316004	-3.0581
2012-10-27 22:59:39	0.32	3		-0.72765	-0.326198	-3.0581
2012-10-27 23:09:39	0.33	2.99		-0.720706	-0.336391	-3.04791
2012-10-27 23:19:39	0.32	3.01		-0.713762	-0.326198	-3.0683
2012-10-27 23:29:39	0.32	3.01		-0.706817	-0.326198	-3.0683
2012-10-27 23:39:39	0.33	3.01		-0.699873	-0.336391	-3.0683
2012-10-27 23:49:39	0.34	3.02		-0.692928	-0.346585	-3.07849
2012-10-27 23:59:39	0.34	3.02		-0.685984	-0.346585	-3.07849
2012-10-28 00:09:39	0.34	3.01		-0.679039	-0.346585	-3.0683
2012-10-28 00:19:39	0.34	3.01		-0.672095	-0.346585	-3.0683
2012-10-28 00:29:39	0.36	2.99		-0.66515	-0.366972	-3.04791
2012-10-28 00:39:39	0.35	3.01		-0.658206	-0.356779	-3.0683
2012-10-28 00:49:39	0.36	3		-0.651262	-0.366972	-3.0581
2012-10-28 00:59:39	0.37	3		-0.644317	-0.377166	-3.0581
2012-10-28 01:09:39	0.35	3.01		-0.637373	-0.356779	-3.0683
2012-10-28 01:19:39	0.35	3.02		-0.630428	-0.356779	-3.07849
2012-10-28 01:29:39	0.37	3.01		-0.623484	-0.377166	-3.0683
2012-10-28 01:39:39	0.36	3.01		-0.616539	-0.366972	-3.0683
2012-10-28 01:49:39	0.36	3.02		-0.609595	-0.366972	-3.07849
2012-10-28 01:59:39	0.38	3.01		-0.60265	-0.38736	-3.0683
2012-10-28 02:09:39	0.37	3		-0.595706	-0.377166	-3.0581
2012-10-28 02:19:39	0.37	3.02		-0.588762	-0.377166	-3.07849
2012-10-28 02:29:39	0.36	3.01		-0.581817	-0.366972	-3.0683
2012-10-28 02:39:39	0.36	3.02		-0.574873	-0.366972	-3.07849
2012-10-28 02:49:39	0.38	3.01		-0.567928	-0.38736	-3.0683
2012-10-28 02:59:39	0.36	3.02		-0.560984	-0.366972	-3.07849
2012-10-28 03:09:39	0.38	3.03		-0.554039	-0.38736	-3.08869
2012-10-28 03:19:39	0.38	3.03		-0.547095	-0.38736	-3.08869
2012-10-28 03:29:39	0.4	3.03		-0.54015	-0.407747	-3.08869
2012-10-28 03:39:39	0.39	3.04		-0.533206	-0.397554	-3.09888
2012-10-28 03:49:39	0.39	3.04		-0.526262	-0.397554	-3.09888
2012-10-28 03:59:39	0.4	3.03		-0.519317	-0.407747	-3.08869
2012-10-28 04:09:39	0.4	3.04		-0.512373	-0.407747	-3.09888
2012-10-28 04:19:39	0.4	3.04		-0.505428	-0.407747	-3.09888
2012-10-28 04:29:39	0.4	3.04		-0.498484	-0.407747	-3.09888
2012-10-28 04:39:39	0.41	3.04		-0.491539	-0.417941	-3.09888
2012-10-28 04:49:39	0.41	3.04		-0.484595	-0.417941	-3.09888
2012-10-28 04:59:39	0.41	3.04		-0.47765	-0.417941	-3.09888
2012-10-28 05:09:39	0.42	3.04		-0.470706	-0.428135	-3.09888
2012-10-28 05:19:39	0.42	3.04		-0.463762	-0.428135	-3.09888
2012-10-28 05:29:39	0.41	3.05		-0.456817	-0.417941	-3.10907
2012-10-28 05:39:39	0.42	3.05		-0.449873	-0.428135	-3.10907
2012-10-28 05:49:39	0.42	3.05		-0.442928	-0.428135	-3.10907
2012-10-28 05:59:39	0.42	3.05		-0.435984	-0.428135	-3.10907
2012-10-28 06:09:39	0.43	3.05		-0.429039	-0.438328	-3.10907
2012-10-28 06:19:39	0.42	3.05		-0.422095	-0.428135	-3.10907
2012-10-28 06:29:39	0.42	3.05		-0.41515	-0.428135	-3.10907
2012-10-28 06:39:39	0.42	3.05		-0.408206	-0.428135	-3.10907
2012-10-28 06:49:39	0.43	3.06		-0.401262	-0.438328	-3.11927
2012-10-28 06:59:39	0.43	3.05		-0.394317	-0.438328	-3.10907
2012-10-28 07:09:39	0.43	3.05		-0.387373	-0.438328	-3.10907
2012-10-28 07:19:39	0.43	3.06		-0.380428	-0.438328	-3.11927
2012-10-28 07:29:39	0.44	3.06		-0.373484	-0.448522	-3.11927
2012-10-28 07:39:39	0.44	3.06		-0.366539	-0.448522	-3.11927
2012-10-28 07:49:39	0.43	3.06		-0.359595	-0.438328	-3.11927
2012-10-28 07:59:39	0.44	3.04		-0.35265	-0.448522	-3.09888
2012-10-28 08:09:39	0.44	3.05		-0.345706	-0.448522	-3.10907
2012-10-28 08:19:39	0.44	3.06		-0.338762	-0.448522	-3.11927
2012-10-28 08:29:39	0.44	3.06		-0.331817	-0.448522	-3.11927
2012-10-28 08:39:39	0.44	3.04		-0.324873	-0.448522	-3.09888
2012-10-28 08:49:39	0.44	3.04		-0.317928	-0.448522	-3.09888
2012-10-28 08:59:39	0.44	3.06		-0.310984	-0.448522	-3.11927
2012-10-28 09:09:39	0.44	3.04		-0.304039	-0.448522	-3.09888
2012-10-28 09:19:39	0.45	3.04		-0.297095	-0.458716	-3.09888
2012-10-28 09:29:39	0.44	3.04		-0.29015	-0.448522	-3.09888
2012-10-28 09:39:39	0.44	3.03		-0.283206	-0.448522	-3.08869
2012-10-28 09:49:39	0.44	3.05		-0.276262	-0.448522	-3.10907
2012-10-28 09:59:39	0.44	3.04		-0.269317	-0.448522	-3.09888
2012-10-28 10:09:39	0.44	3.05		-0.262373	-0.448522	-3.10907
2012-10-28 10:19:39	0.44	3.05		-0.255428	-0.448522	-3.10907
2012-10-28 10:29:39	0.44	3.04		-0.248484	-0.448522	-3.09888
2012-10-28 10:39:39	0.44	3.03		-0.241539	-0.448522	-3.08869
2012-10-28 10:49:39	0.43	3.03		-0.234595	-0.438328	-3.08869
2012-10-28 10:59:39	0.44	3.04		-0.22765	-0.448522	-3.09888
2012-10-28 11:09:39	0.43	3.05		-0.220706	-0.438328	-3.10907
2012-10-28 11:19:39	0.44	3.05		-0.213762	-0.448522	-3.10907
2012-10-28 11:29:39	0.45	3.05		-0.206817	-0.458716	-3.10907
2012-10-28 11:39:39	0.45	3.05		-0.199873	-0.458716	-3.10907
2012-10-28 11:49:39	0.45	3.05		-0.192928	-0.458716	-3.10907
2012-10-28 11:59:39	0.44	3.05		-0.185984	-0.448522	-3.10907
2012-10-28 12:09:39	0.46	3.04		-0.179039	-0.468909	-3.09888
2012-10-28 12:19:39	0.45	3.05		-0.172095	-0.458716	-3.10907
2012-10-28 12:29:39	0.45	3.05		-0.16515	-0.458716	-3.10907
2012-10-28 12:39:39	0.45	3.05		-0.158206	-0.458716	-3.10907
2012-10-28 12:49:39	0.45	3.06		-0.151262	-0.458716	-3.11927
2012-10-28 12:59:39	0.45	3.05		-0.144317	-0.458716	-3.10907
2012-10-28 13:09:39	0.46	3.05		-0.137373	-0.468909	-3.10907
2012-10-28 13:19:39	0.45	3.05		-0.130428	-0.458716	-3.10907
2012-10-28 13:29:39	0.44	3.04		-0.123484	-0.448522	-3.09888
2012-10-28 13:39:39	0.44	3.03		-0.116539	-0.448522	-3.08869
2012-10-28 13:49:39	0.43	3.03		-0.109595	-0.438328	-3.08869
2012-10-28 13:59:39	0.43	3.03		-0.10265	-0.438328	-3.08869
2012-10-28 14:09:39	0.43	3.03		-0.095706	-0.438328	-3.08869
2012-10-28 14:19:39	0.42	3.02		-0.0887616	-0.428135	-3.07849
2012-10-28 14:29:39	0.42	3.02		-0.0818171	-0.428135	-3.07849
2012-10-28 14:39:39	0.42	3.02		-0.0748727	-0.428135	-3.07849
2012-10-28 14:49:39	0.42	3.01		-0.0679282	-0.428135	-3.0683
2012-10-28 14:59:39	0.4	3.01		-0.0609838	-0.407747	-3.0683
2012-10-28 15:09:39	0.4	3		-0.0540394	-0.407747	-3.0581
2012-10-28 15:19:39	0.4	3		-0.0470949	-0.407747	-3.0581
2012-10-28 15:29:39	0.39	2.99		-0.0401505	-0.397554	-3.04791
2012-10-28 15:39:39	0.39	2.99		-0.033206	-0.397554	-3.04791
2012-10-28 15:49:39	0.39	2.98		-0.0262616	-0.397554	-3.03772
2012-10-28 15:59:39	0.38	2.98		-0.0193171	-0.38736	-3.03772
2012-10-28 16:09:39	0.53	3.14		-0.0123727	-0.540265	-3.20082
2012-10-28 16:19:39	0.58	3.17		-0.00542824	-0.591233	-3.2314
2012-10-28 16:29:39	0.65	3.22		0.0015162	-0.662589	-3.28236	2012-10-28 16:29:39
2012-10-28 16:39:39	0.71	3.26		0.00846065	-0.723751	-3.32314
2012-10-28 16:49:39	0.81	3.32		0.0154051	-0.825688	-3.3843
2012-10-28 16:59:39	0.88	3.42		0.0223495	-0.897044	-3.48624
2012-10-28 17:09:39	0.93	3.47		0.029294	-0.948012	-3.53721
2012-10-28 17:19:39	1.01	3.56		0.0362384	-1.02956	-3.62895
2012-10-28 17:29:39	1.1	3.61		0.0431829	-1.1213	-3.67992	2012-10-28 17:29:39
2012-10-28 17:39:39	1.16	3.69		0.0501273	-1.18247	-3.76147
2012-10-28 17:49:39	1.24	3.78		0.0570718	-1.26402	-3.85321
2012-10-28 17:59:39	1.32	3.86		0.0640162	-1.34557	-3.93476
2012-10-28 18:09:39	1.41	3.94		0.0709606	-1.43731	-4.01631
2012-10-28 18:19:39	1.5	4.03		0.0779051	-1.52905	-4.10805
2012-10-28 18:29:39	1.59	4.11		0.0848495	-1.6208	-4.1896	2012-10-28 18:29:39
2012-10-28 18:39:39	1.68	4.2		0.091794	-1.71254	-4.28135
2012-10-28 18:49:39	1.77	4.3		0.0987384	-1.80428	-4.38328
2012-10-28 18:59:39	1.84	4.37		0.105683	-1.87564	-4.45464
2012-10-28 19:09:39	1.91	4.45		0.112627	-1.94699	-4.53619
2012-10-28 19:19:39	2	4.53		0.119572	-2.03874	-4.61774
2012-10-28 19:29:39	2.08	4.62		0.126516	-2.12029	-4.70948	2012-10-28 19:29:39
2012-10-28 19:39:39	2.15	4.69		0.133461	-2.19164	-4.78084
2012-10-28 19:49:39	2.25	4.78		0.140405	-2.29358	-4.87258
2012-10-28 19:59:39	2.34	4.87		0.14735	-2.38532	-4.96432
2012-10-28 20:09:39	2.43	4.95		0.154294	-2.47706	-5.04587
2012-10-28 20:19:39	2.49	5.03		0.161238	-2.53823	-5.12742
2012-10-28 20:29:39	2.57	5.1		0.168183	-2.61978	-5.19878	2012-10-28 20:29:39
2012-10-28 20:39:39	2.64	5.17		0.175127	-2.69113	-5.27013
2012-10-28 20:49:39	2.72	5.25		0.182072	-2.77268	-5.35168
2012-10-28 20:59:39	2.79	5.31		0.189016	-2.84404	-5.41284
2012-10-28 21:09:39	2.86	5.39		0.195961	-2.91539	-5.49439
2012-10-28 21:19:39	2.89	5.43		0.202905	-2.94597	-5.53517
2012-10-28 21:29:39	3	5.53		0.20985	-3.0581	-5.6371	2012-10-28 21:29:39
2012-10-28 21:39:39	3.04	5.56		0.216794	-3.09888	-5.66769
2012-10-28 21:49:39	3.11	5.64		0.223738	-3.17023	-5.74924
2012-10-28 21:59:39	3.19	5.72		0.230683	-3.25178	-5.83078
2012-10-28 22:09:39	3.28	5.81		0.237627	-3.34353	-5.92253
2012-10-28 22:19:39	3.35	5.88		0.244572	-3.41488	-5.99388
2012-10-28 22:29:39	3.45	5.97		0.251516	-3.51682	-6.08563	2012-10-28 22:29:39
2012-10-28 22:39:39	3.22	5.74		0.258461	-3.28236	-5.85117
2012-10-28 22:49:39	3.37	5.89		0.265405	-3.43527	-6.00408
2012-10-28 22:59:39	3.48	6		0.27235	-3.5474	-6.11621
2012-10-28 23:09:39	3.57	6.09		0.279294	-3.63914	-6.20795
2012-10-28 23:19:39	3.61	6.13		0.286238	-3.67992	-6.24873
2012-10-28 23:29:39	3.7	6.21		0.293183	-3.77166	-6.33028	2012-10-28 23:29:39
2012-10-28 23:39:39	3.76	6.28		0.300127	-3.83282	-6.40163
2012-10-28 23:49:39	3.84	6.36		0.307072	-3.91437	-6.48318
2012-10-28 23:59:39	3.89	6.4		0.314016	-3.96534	-6.52396
2012-10-29 00:09:39	3.91	6.42		0.320961	-3.98573	-6.54434
2012-10-29 00:19:39	3.99	6.51		0.327905	-4.06728	-6.63609
2012-10-29 00:29:39	4.03	6.54		0.33485	-4.10805	-6.66667	2012-10-29 00:29:39
2012-10-29 00:39:39	4.04	6.55		0.341794	-4.11825	-6.67686
2012-10-29 00:49:39	4.14	6.66		0.348738	-4.22018	-6.78899
2012-10-29 00:59:39	4.2	6.7		0.355683	-4.28135	-6.82977
2012-10-29 01:09:39	4.25	6.76		0.362627	-4.33231	-6.89093
2012-10-29 01:19:39	4.3	6.81		0.369572	-4.38328	-6.9419
2012-10-29 01:29:39	4.33	6.84		0.376516	-4.41386	-6.97248	2012-10-29 01:29:39
2012-10-29 01:39:39	4.42	6.93		0.383461	-4.50561	-7.06422
2012-10-29 01:49:39	4.48	6.98		0.390405	-4.56677	-7.11519
2012-10-29 01:59:39	4.53	7.04		0.39735	-4.61774	-7.17635
2012-10-29 02:09:39	4.59	7.09		0.404294	-4.6789	-7.22732
2012-10-29 02:19:39	4.44	6.94		0.411238	-4.52599	-7.07441
2012-10-29 02:29:39	4.24	6.75		0.418183	-4.32212	-6.88073	2012-10-29 02:29:39
2012-10-29 02:39:39	4.31	6.82		0.425127	-4.39348	-6.95209
2012-10-29 02:49:39	4.42	6.93		0.432072	-4.50561	-7.06422
2012-10-29 02:59:39	4.5	7.01		0.439016	-4.58716	-7.14577
2012-10-29 03:09:39	4.4	6.9		0.445961	-4.48522	-7.03364
2012-10-29 03:19:39	4.45	6.95		0.452905	-4.53619	-7.08461
2012-10-29 03:29:39	4.51	7.01		0.45985	-4.59735	-7.14577	2012-10-29 03:29:39
2012-10-29 03:39:39	4.56	7.06		0.466794	-4.64832	-7.19674
2012-10-29 03:49:39	4.56	7.07		0.473738	-4.64832	-7.20693
2012-10-29 03:59:39	4.59	7.09		0.480683	-4.6789	-7.22732
2012-10-29 04:09:39	4.63	7.13		0.487627	-4.71967	-7.26809
2012-10-29 04:19:39	4.67	7.17		0.494572	-4.76045	-7.30887
2012-10-29 04:29:39	4.7	7.2		0.501516	-4.79103	-7.33945	2012-10-29 04:29:39
2012-10-29 04:39:39	4.72	7.19		0.508461	-4.81142	-7.32926
2012-10-29 04:49:39	4.72	7.22		0.515405	-4.81142	-7.35984
2012-10-29 04:59:39	4.7	7.17		0.52235	-4.79103	-7.30887
2012-10-29 05:09:39	4.77	7.22		0.529294	-4.86239	-7.35984
2012-10-29 05:19:39	4.78	7.25		0.536238	-4.87258	-7.39042
2012-10-29 05:29:39	4.79	7.24		0.543183	-4.88277	-7.38022	2012-10-29 05:29:39
2012-10-29 05:39:39	4.8	7.28		0.550127	-4.89297	-7.421
2012-10-29 05:49:39	4.81	7.26		0.557072	-4.90316	-7.40061
2012-10-29 05:59:39	4.86	7.35		0.564016	-4.95413	-7.49235
2012-10-29 06:09:39	4.9	7.38		0.570961	-4.9949	-7.52294
2012-10-29 06:19:39	4.96	7.44		0.577905	-5.05607	-7.5841
2012-10-29 06:29:39	5.03	7.48		0.58485	-5.12742	-7.62487	2012-10-29 06:29:39
2012-10-29 06:39:39	5.07	7.52		0.591794	-5.1682	-7.66565
2012-10-29 06:49:39	5.1	7.59		0.598738	-5.19878	-7.737
2012-10-29 06:59:39	5.11	7.59		0.605683	-5.20897	-7.737
2012-10-29 07:09:39	5.17	7.64		0.612627	-5.27013	-7.78797
2012-10-29 07:19:39	5.21	7.69		0.619572	-5.31091	-7.83894
2012-10-29 07:29:39	5.22	7.7		0.626516	-5.3211	-7.84913	2012-10-29 07:29:39
2012-10-29 07:39:39	5.26	7.73		0.633461	-5.36188	-7.87971
2012-10-29 07:49:39	5.04	7.53		0.640405	-5.13761	-7.67584
2012-10-29 07:59:39	5.15	7.63		0.64735	-5.24975	-7.77778
2012-10-29 08:09:39	5.24	7.73		0.654294	-5.34149	-7.87971
2012-10-29 08:19:39	5.32	7.81		0.661238	-5.42304	-7.96126
2012-10-29 08:29:39	5.34	7.83		0.668183	-5.44343	-7.98165	2012-10-29 08:29:39
2012-10-29 08:39:39	5.41	7.9		0.675127	-5.51478	-8.05301
2012-10-29 08:49:39	4.75	7.23		0.682072	-4.842	-7.37003
2012-10-29 08:59:39	4.81	7.29		0.689016	-4.90316	-7.43119
2012-10-29 09:09:39	4.86	7.34		0.695961	-4.95413	-7.48216
2012-10-29 09:19:39	4.9	7.38		0.702905	-4.9949	-7.52294
2012-10-29 09:29:39	4.93	7.41		0.70985	-5.02548	-7.55352	2012-10-29 09:29:39
2012-10-29 09:39:39	4.97	7.46		0.716794	-5.06626	-7.60449
2012-10-29 09:49:39	5.02	7.46		0.723738	-5.11723	-7.60449
2012-10-29 09:59:39	5.07	7.52		0.730683	-5.1682	-7.66565
2012-10-29 10:09:39	5.09	7.54		0.737627	-5.18858	-7.68603
2012-10-29 10:19:39	5.11	7.59		0.744572	-5.20897	-7.737
2012-10-29 10:29:39	5.17	7.63		0.751516	-5.27013	-7.77778	2012-10-29 10:29:39
2012-10-29 10:39:39	5.18	7.66		0.758461	-5.28033	-7.80836
2012-10-29 10:49:39	5.24	7.7		0.765405	-5.34149	-7.84913
2012-10-29 10:59:39	5.23	7.69		0.77235	-5.33129	-7.83894
2012-10-29 11:09:39	5.28	7.76		0.779294	-5.38226	-7.9103
2012-10-29 11:19:39	5.28	7.76		0.786238	-5.38226	-7.9103
2012-10-29 11:29:39	5.25	7.73		0.793183	-5.35168	-7.87971	2012-10-29 11:29:39
2012-10-29 11:39:39	5.31	7.79		0.800127	-5.41284	-7.94088
2012-10-29 11:49:39	5.34	7.81		0.807072	-5.44343	-7.96126
2012-10-29 11:59:39	5.3	7.77		0.814016	-5.40265	-7.92049
2012-10-29 12:09:39	5.34	7.82		0.820961	-5.44343	-7.97146
2012-10-29 12:19:39	5.38	7.83		0.827905	-5.4842	-7.98165
2012-10-29 12:29:39	5.42	7.88		0.83485	-5.52497	-8.03262	2012-10-29 12:29:39
2012-10-29 12:39:39	5.42	7.88		0.841794	-5.52497	-8.03262
2012-10-29 12:49:39	5.44	7.92		0.848738	-5.54536	-8.07339
2012-10-29 12:59:39	5.47	7.94		0.855683	-5.57594	-8.09378
2012-10-29 13:09:39	5.48	7.95		0.862627	-5.58614	-8.10398
2012-10-29 13:19:39	5.49	7.97		0.869572	-5.59633	-8.12436
2012-10-29 13:29:39	5.51	7.98		0.876516	-5.61672	-8.13456	2012-10-29 13:29:39
2012-10-29 13:39:39	5.36	7.84		0.883461	-5.46381	-7.99185
2012-10-29 13:49:39	5.28	7.79		0.890405	-5.38226	-7.94088
2012-10-29 13:59:39	5.38	7.86		0.89735	-5.4842	-8.01223
2012-10-29 14:09:39	5.43	7.9		0.904294	-5.53517	-8.05301
2012-10-29 14:19:39	5.47	7.93		0.911238	-5.57594	-8.08359
2012-10-29 14:29:39	5.49	7.96		0.918183	-5.59633	-8.11417	2012-10-29 14:29:39
2012-10-29 14:39:39	5.52	7.99		0.925127	-5.62691	-8.14475
2012-10-29 14:49:39	5.51	7.99		0.932072	-5.61672	-8.14475
2012-10-29 14:59:39	5.55	8.02		0.939016	-5.65749	-8.17533
2012-10-29 15:09:39	5.55	8.02		0.945961	-5.65749	-8.17533
2012-10-29 15:19:39	5.6	8.06		0.952905	-5.70846	-8.21611
2012-10-29 15:29:39	5.6	8.08		0.95985	-5.70846	-8.23649	2012-10-29 15:29:39
2012-10-29 15:39:39	5.62	8.09		0.966794	-5.72885	-8.24669
2012-10-29 15:49:39	5.64	8.11		0.973738	-5.74924	-8.26707
2012-10-29 15:59:39	5.65	8.08		0.980683	-5.75943	-8.23649
2012-10-29 16:09:39	5.65	8.12		0.987627	-5.75943	-8.27727
2012-10-29 16:19:39	5.7	8.13		0.994572	-5.8104	-8.28746
2012-10-29 16:29:39	5.7	8.16		1.00152	-5.8104	-8.31804	2012-10-29 16:29:39
2012-10-29 16:39:39	5.72	8.16		1.00846	-5.83078	-8.31804
2012-10-29 16:49:39	5.71	8.16		1.01541	-5.82059	-8.31804
2012-10-29 16:59:39	5.75	8.22		1.02235	-5.86137	-8.3792
2012-10-29 17:09:39	5.78	8.24		1.02929	-5.89195	-8.39959
2012-10-29 17:19:39	5.81	8.23		1.03624	-5.92253	-8.3894
2012-10-29 17:29:39	5.81	8.28		1.04318	-5.92253	-8.44037	2012-10-29 17:29:39
2012-10-29 17:39:39	5.83	8.29		1.05013	-5.94292	-8.45056
2012-10-29 17:59:39	5.47	7.93		1.06402	-5.57594	-8.08359
2012-10-29 18:09:39	5.52	7.98		1.07096	-5.62691	-8.13456
2012-10-29 18:19:39	5.6	8.05		1.07791	-5.70846	-8.20591
2012-10-29 18:29:39	5.65	8.11		1.08485	-5.75943	-8.26707
2012-10-29 18:39:39	5.7	8.16		1.09179	-5.8104	-8.31804	2012-10-29 18:39:39
2012-10-29 18:49:39	5.75	8.2		1.09874	-5.86137	-8.35882
2012-10-29 18:59:39	5.79	8.25		1.10568	-5.90214	-8.40979
2012-10-29 19:09:39	5.83	8.28		1.11263	-5.94292	-8.44037
2012-10-29 19:19:39	5.86	8.31		1.11957	-5.9735	-8.47095
2012-10-29 19:29:39	5.89	8.36		1.12652	-6.00408	-8.52192
2012-10-29 19:39:39	5.92	8.35		1.13346	-6.03466	-8.51172	2012-10-29 19:39:39
2012-10-29 19:49:39	5.94	8.38		1.14041	-6.05505	-8.5423
2012-10-29 19:59:39	5.94	8.39		1.14735	-6.05505	-8.5525
2012-10-29 20:09:39	5.97	8.42		1.15429	-6.08563	-8.58308
2012-10-29 20:19:39	5.98	8.41		1.16124	-6.09582	-8.57288
2012-10-29 20:29:39	5.99	8.44		1.16818	-6.10601	-8.60347
2012-10-29 20:39:39	6	8.45		1.17513	-6.11621	-8.61366	2012-10-29 20:39:39
2012-10-29 20:49:39	6.05	8.46		1.18207	-6.16718	-8.62385
2012-10-29 20:59:39	6.02	8.46		1.18902	-6.1366	-8.62385
2012-10-29 21:09:39	6.06	8.5		1.19596	-6.17737	-8.66463
2012-10-29 21:19:39	6.08	8.53		1.20291	-6.19776	-8.69521
2012-10-29 21:29:39	6.07	8.52		1.20985	-6.18756	-8.68502
2012-10-29 21:39:39	6.12	8.56		1.21679	-6.23853	-8.72579	2012-10-29 21:39:39
2012-10-29 21:49:39	6.12	8.57		1.22374	-6.23853	-8.73598
2012-10-29 21:59:39	6.14	8.58		1.23068	-6.25892	-8.74618
2012-10-29 22:09:39	6.15	8.59		1.23763	-6.26911	-8.75637
2012-10-29 22:19:39	6.18	8.61		1.24457	-6.29969	-8.77676
2012-10-29 22:29:39	6.2	8.64		1.25152	-6.32008	-8.80734
2012-10-29 22:39:39	6.18	8.64		1.25846	-6.29969	-8.80734	2012-10-29 22:39:39
2012-10-29 22:49:39	6.22	8.66		1.26541	-6.34047	-8.82773
2012-10-29 22:59:39	6.24	8.69		1.27235	-6.36086	-8.85831
2012-10-29 23:09:39	6.23	8.68		1.27929	-6.35066	-8.84811
2012-10-29 23:19:39	6.25	8.69		1.28624	-6.37105	-8.85831
2012-10-29 23:29:39	6.28	8.72		1.29318	-6.40163	-8.88889
2012-10-29 23:39:39	6.28	8.73		1.30013	-6.40163	-8.89908	2012-10-29 23:39:39
2012-10-29 23:49:39	6.29	8.74		1.30707	-6.41182	-8.90928
2012-10-29 23:59:39	6.29	8.75		1.31402	-6.41182	-8.91947
2012-10-30 00:09:39	6.24	8.7		1.32096	-6.36086	-8.8685
2012-10-30 00:19:39	6.3	8.75		1.32791	-6.42202	-8.91947
2012-10-30 00:29:39	6.33	8.78		1.33485	-6.4526	-8.95005
2012-10-30 00:39:39	6.35	8.81		1.34179	-6.47299	-8.98063	2012-10-30 00:39:39
2012-10-30 00:49:39	6.38	8.83		1.34874	-6.50357	-9.00102
2012-10-30 00:59:39	6.38	8.83		1.35568	-6.50357	-9.00102
2012-10-30 01:09:39	6.4	8.85		1.36263	-6.52396	-9.02141
2012-10-30 01:19:39	6.4	8.85		1.36957	-6.52396	-9.02141
2012-10-30 01:29:39	6.44	8.88		1.37652	-6.56473	-9.05199
2012-10-30 01:39:39	6.45	8.89		1.38346	-6.57492	-9.06218	2012-10-30 01:39:39
2012-10-30 01:49:39	6.47	8.91		1.39041	-6.59531	-9.08257
2012-10-30 01:59:39	6.48	8.92		1.39735	-6.6055	-9.09276
2012-10-30 02:09:39	6.43	8.88		1.40429	-6.55454	-9.05199
2012-10-30 02:19:39	6.41	8.85		1.41124	-6.53415	-9.02141
2012-10-30 02:29:39	6.46	8.9		1.41818	-6.58512	-9.07238
2012-10-30 02:39:39	6.47	8.91		1.42513	-6.59531	-9.08257	2012-10-30 02:39:39
2012-10-30 02:49:39	6.5	8.95		1.43207	-6.62589	-9.12334
2012-10-30 02:59:39	6.46	8.91		1.43902	-6.58512	-9.08257
2012-10-30 03:09:39	6.5	8.95		1.44596	-6.62589	-9.12334
2012-10-30 03:19:39	6.49	8.94		1.45291	-6.6157	-9.11315
2012-10-30 03:29:39	6.53	8.98		1.45985	-6.65647	-9.15392
2012-10-30 03:39:39	6.37	8.82		1.46679	-6.49337	-8.99083	2012-10-30 03:39:39
2012-10-30 03:49:39	6.4	8.84		1.47374	-6.52396	-9.01121
2012-10-30 03:59:39	6.45	8.9		1.48068	-6.57492	-9.07238
2012-10-30 04:09:39	6.51	8.96		1.48763	-6.63609	-9.13354
2012-10-30 04:19:39	6.55	8.99		1.49457	-6.67686	-9.16412
2012-10-30 04:29:39	6.57	9.01		1.50152	-6.69725	-9.18451
2012-10-30 04:39:39	6.57	9.01		1.50846	-6.69725	-9.18451	2012-10-30 04:39:39
2012-10-30 04:49:39	6.59	9.03		1.51541	-6.71764	-9.20489
2012-10-30 04:59:39	6.61	9.06		1.52235	-6.73802	-9.23547
2012-10-30 05:09:39	6.63	9.07		1.52929	-6.75841	-9.24567
2012-10-30 05:19:39	6.66	9.1		1.53624	-6.78899	-9.27625
2012-10-30 05:29:39	6.64	9.09		1.54318	-6.7686	-9.26606
2012-10-30 05:39:39	6.68	9.12		1.55013	-6.80938	-9.29664	2012-10-30 05:39:39
2012-10-30 05:49:39	6.69	9.13		1.55707	-6.81957	-9.30683
2012-10-30 05:59:39	6.7	9.14		1.56402	-6.82977	-9.31702
2012-10-30 06:09:39	6.71	9.16		1.57096	-6.83996	-9.33741
2012-10-30 06:19:39	6.71	9.16		1.57791	-6.83996	-9.33741
2012-10-30 06:29:39	6.62	9.07		1.58485	-6.74822	-9.24567
2012-10-30 06:39:39	6.68	9.13		1.59179	-6.80938	-9.30683	2012-10-30 06:39:39
2012-10-30 06:49:39	6.69	9.14		1.59874	-6.81957	-9.31702
2012-10-30 06:59:39	6.71	9.13		1.60568	-6.83996	-9.30683
2012-10-30 07:09:39	6.69	9.13		1.61263	-6.81957	-9.30683
2012-10-30 07:19:39	6.56	8.99		1.61957	-6.68705	-9.16412
2012-10-30 07:29:39	6.64	9.05		1.62652	-6.7686	-9.22528
2012-10-30 07:39:39	6.69	9.09		1.63346	-6.81957	-9.26606	2012-10-30 07:39:39
2012-10-30 07:49:39	6.73	9.14		1.64041	-6.86035	-9.31702
2012-10-30 07:59:39	6.3	8.73		1.64735	-6.42202	-8.89908
2012-10-30 08:09:39	6.28	8.73		1.65429	-6.40163	-8.89908
2012-10-30 08:19:39	6.32	8.78		1.66124	-6.44241	-8.95005
2012-10-30 08:29:39	6.39	8.82		1.66818	-6.51376	-8.99083
2012-10-30 08:39:39	6.42	8.87		1.67513	-6.54434	-9.04179	2012-10-30 08:39:39
2012-10-30 08:49:39	6.48	8.91		1.68207	-6.6055	-9.08257
2012-10-30 08:59:39	6.52	8.97		1.68902	-6.64628	-9.14373
2012-10-30 09:09:39	6.58	9		1.69596	-6.70744	-9.17431
2012-10-30 09:19:39	6.57	9.04		1.70291	-6.69725	-9.21509
2012-10-30 09:29:39	6.63	9.04		1.70985	-6.75841	-9.21509
2012-10-30 09:39:39	6.64	9.08		1.71679	-6.7686	-9.25586	2012-10-30 09:39:39
2012-10-30 09:49:39	6.7	9.11		1.72374	-6.82977	-9.28644
2012-10-30 09:59:39	6.69	9.11		1.73068	-6.81957	-9.28644
2012-10-30 10:09:39	6.69	9.11		1.73763	-6.81957	-9.28644
2012-10-30 10:19:39	6.67	9.1		1.74457	-6.79918	-9.27625
2012-10-30 10:29:39	6.7	9.12		1.75152	-6.82977	-9.29664
2012-10-30 10:39:39	6.69	9.13		1.75846	-6.81957	-9.30683	2012-10-30 10:39:39
2012-10-30 10:49:39	6.67	9.11		1.76541	-6.79918	-9.28644
2012-10-30 10:59:39	6.71	9.16		1.77235	-6.83996	-9.33741
2012-10-30 11:09:39	6.66	9.09		1.77929	-6.78899	-9.26606
2012-10-30 11:19:39	6.72	9.16		1.78624	-6.85015	-9.33741
2012-10-30 11:29:39	6.7	9.15		1.79318	-6.82977	-9.32722
2012-10-30 11:39:39	6.74	9.18		1.80013	-6.87054	-9.3578	2012-10-30 11:39:39
2012-10-30 11:49:39	6.75	9.18		1.80707	-6.88073	-9.3578
2012-10-30 11:59:39	6.76	9.2		1.81402	-6.89093	-9.37819
2012-10-30 12:09:39	6.77	9.21		1.82096	-6.90112	-9.38838
2012-10-30 12:19:39	6.77	9.2		1.82791	-6.90112	-9.37819
2012-10-30 12:29:39	6.77	9.21		1.83485	-6.90112	-9.38838
2012-10-30 12:39:39	6.77	9.21		1.84179	-6.90112	-9.38838	2012-10-30 12:39:39
2012-10-30 12:49:39	6.72	9.17		1.84874	-6.85015	-9.3476
2012-10-30 12:59:39	6.76	9.17		1.85568	-6.89093	-9.3476
2012-10-30 13:09:39	6.79	9.23		1.86263	-6.92151	-9.40877
2012-10-30 13:19:39	6.79	9.22		1.86957	-6.92151	-9.39857
2012-10-30 13:29:39	6.79	9.24		1.87652	-6.92151	-9.41896
2012-10-30 13:39:39	6.82	9.26		1.88346	-6.95209	-9.43935	2012-10-30 13:39:39
2012-10-30 13:49:39	6.83	9.27		1.89041	-6.96228	-9.44954
2012-10-30 13:59:39	6.82	9.26		1.89735	-6.95209	-9.43935
2012-10-30 14:09:39	6.83	9.28		1.90429	-6.96228	-9.45973
2012-10-30 14:19:39	6.81	9.26		1.91124	-6.9419	-9.43935
2012-10-30 14:29:39	6.81	9.27		1.91818	-6.9419	-9.44954
2012-10-30 14:39:39	6.82	9.27		1.92513	-6.95209	-9.44954	2012-10-30 14:39:39
2012-10-30 14:49:39	6.83	9.28		1.93207	-6.96228	-9.45973
2012-10-30 14:59:39	6.81	9.25		1.93902	-6.9419	-9.42915
2012-10-30 15:09:39	6.82	9.28		1.94596	-6.95209	-9.45973
2012-10-30 15:19:39	6.83	9.28		1.95291	-6.96228	-9.45973
2012-10-30 15:29:39	6.84	9.29		1.95985	-6.97248	-9.46993
2012-10-30 15:39:39	6.85	9.3		1.96679	-6.98267	-9.48012	2012-10-30 15:39:39
2012-10-30 15:49:39	6.87	9.31		1.97374	-7.00306	-9.49032
2012-10-30 15:59:39	6.85	9.3		1.98068	-6.98267	-9.48012
2012-10-30 16:09:39	6.87	9.32		1.98763	-7.00306	-9.50051
2012-10-30 16:19:39	6.88	9.33		1.99457	-7.01325	-9.5107
2012-10-30 16:29:39	6.87	9.33		2.00152	-7.00306	-9.5107
2012-10-30 16:39:39	6.9	9.35		2.00846	-7.03364	-9.53109	2012-10-30 16:39:39
2012-10-30 16:49:39	6.9	9.35		2.01541	-7.03364	-9.53109
2012-10-30 16:59:39	6.93	9.37		2.02235	-7.06422	-9.55148
2012-10-30 17:09:39	6.95	9.38		2.02929	-7.08461	-9.56167
2012-10-30 17:19:39	6.96	9.39		2.03624	-7.0948	-9.57187
2012-10-30 17:29:39	6.95	9.4		2.04318	-7.08461	-9.58206
2012-10-30 17:39:39	6.94	9.38		2.05013	-7.07441	-9.56167	2012-10-30 17:39:39
2012-10-30 17:49:39	6.96	9.39		2.05707	-7.0948	-9.57187
2012-10-30 17:59:39	6.89	9.33		2.06402	-7.02345	-9.5107
2012-10-30 18:09:39	6.94	9.38		2.07096	-7.07441	-9.56167
2012-10-30 18:19:39	6.96	9.39		2.07791	-7.0948	-9.57187
2012-10-30 18:29:39	6.97	9.42		2.08485	-7.10499	-9.60245
2012-10-30 18:39:39	6.99	9.43		2.09179	-7.12538	-9.61264	2012-10-30 18:39:39
2012-10-30 18:49:39	6.98	9.42		2.09874	-7.11519	-9.60245
2012-10-30 18:59:39	7	9.44		2.10568	-7.13558	-9.62283
2012-10-30 19:09:39	7.02	9.45		2.11263	-7.15596	-9.63303
2012-10-30 19:19:39	7.02	9.46		2.11957	-7.15596	-9.64322
2012-10-30 19:29:39	7.03	9.46		2.12652	-7.16616	-9.64322
2012-10-30 19:39:39	7.05	9.49		2.13346	-7.18654	-9.6738	2012-10-30 19:39:39
2012-10-30 19:49:39	7.06	9.5		2.14041	-7.19674	-9.684
2012-10-30 19:59:39	7.09	9.52		2.14735	-7.22732	-9.70438
2012-10-30 20:09:39	7.09	9.53		2.15429	-7.22732	-9.71458
2012-10-30 20:19:39	7.1	9.54		2.16124	-7.23751	-9.72477
2012-10-30 20:29:39	7.14	9.53		2.16818	-7.27829	-9.71458
2012-10-30 20:39:39	6.88	9.31		2.17513	-7.01325	-9.49032	2012-10-30 20:39:39
2012-10-30 20:49:39	6.93	9.36		2.18207	-7.06422	-9.54128
2012-10-30 20:59:39	6.99	9.42		2.18902	-7.12538	-9.60245
2012-10-30 21:09:39	7.04	9.47		2.19596	-7.17635	-9.65341
2012-10-30 21:19:39	7.08	9.5		2.20291	-7.21713	-9.684
2012-10-30 21:29:39	7.12	9.55		2.20985	-7.2579	-9.73496
2012-10-30 21:39:39	7.16	9.59		2.21679	-7.29867	-9.77574	2012-10-30 21:39:39
2012-10-30 21:49:39	7.18	9.61		2.22374	-7.31906	-9.79613
2012-10-30 21:59:39	7.19	9.61		2.23068	-7.32926	-9.79613
2012-10-30 22:09:39	7.22	9.65		2.23763	-7.35984	-9.8369
2012-10-30 22:19:39	7.23	9.66		2.24457	-7.37003	-9.84709
2012-10-30 22:29:39	7.25	9.68		2.25152	-7.39042	-9.86748
2012-10-30 22:39:39	7.25	9.68		2.25846	-7.39042	-9.86748	2012-10-30 22:39:39
2012-10-30 22:49:39	7.29	9.71		2.26541	-7.43119	-9.89806
2012-10-30 22:59:39	7.3	9.73		2.27235	-7.44139	-9.91845
2012-10-30 23:09:39	7.31	9.75		2.27929	-7.45158	-9.93884
2012-10-30 23:19:39	7.28	9.71		2.28624	-7.421	-9.89806
2012-10-30 23:29:39	7.32	9.74		2.29318	-7.46177	-9.92864
2012-10-30 23:39:39	7.33	9.76		2.30013	-7.47197	-9.94903	2012-10-30 23:39:39
2012-10-30 23:49:39	7.32	9.74		2.30707	-7.46177	-9.92864
2012-10-30 23:59:39	7.35	9.77		2.31402	-7.49235	-9.95923
2012-10-31 00:09:39	7.3	9.72		2.32096	-7.44139	-9.90826
2012-10-31 00:19:39	7.35	9.77		2.32791	-7.49235	-9.95923
2012-10-31 00:29:39	7.36	9.79		2.33485	-7.50255	-9.97961
2012-10-31 00:39:39	7.39	9.81		2.34179	-7.53313	-10	2012-10-31 00:39:39
2012-10-31 00:49:39	7.41	9.81		2.34874	-7.55352	-10
2012-10-31 00:59:39	7.42	9.85		2.35568	-7.56371	-10.0408
2012-10-31 01:09:39	7.44	9.87		2.36263	-7.5841	-10.0612
2012-10-31 01:19:39	7.43	9.86		2.36957	-7.5739	-10.051
2012-10-31 01:29:39	7.48	9.87		2.37652	-7.62487	-10.0612
2012-10-31 01:39:39	7.48	9.89		2.38346	-7.62487	-10.0815	2012-10-31 01:39:39
2012-10-31 01:49:39	7.5	9.89		2.39041	-7.64526	-10.0815
2012-10-31 01:59:39	7.51	9.92		2.39735	-7.65545	-10.1121
2012-10-31 02:09:39	7.52	9.94		2.40429	-7.66565	-10.1325
2012-10-31 02:19:39	7.53	9.94		2.41124	-7.67584	-10.1325
2012-10-31 02:29:39	7.55	9.94		2.41818	-7.69623	-10.1325
2012-10-31 02:39:39	7.56	9.95		2.42513	-7.70642	-10.1427	2012-10-31 02:39:39
2012-10-31 02:49:39	7.56	9.98		2.43207	-7.70642	-10.1733
2012-10-31 02:59:39	7.6	9.98		2.43902	-7.7472	-10.1733
2012-10-31 03:09:39	7.58	9.97		2.44596	-7.72681	-10.1631
2012-10-31 03:19:39	7.59	9.98		2.45291	-7.737	-10.1733
2012-10-31 03:29:39	7.61	10.03		2.45985	-7.75739	-10.2243
2012-10-31 03:39:39	7.61	10.03		2.46679	-7.75739	-10.2243	2012-10-31 03:39:39
2012-10-31 03:49:39	7.63	10.05		2.47374	-7.77778	-10.2446
2012-10-31 03:59:39	7.66	10.05		2.48068	-7.80836	-10.2446
2012-10-31 04:09:39	7.68	10.06		2.48763	-7.82875	-10.2548
2012-10-31 04:19:39	7.68	10.1		2.49457	-7.82875	-10.2956
2012-10-31 04:29:39	7.72	10.09		2.50152	-7.86952	-10.2854
2012-10-31 04:39:39	7.7	10.11		2.50846	-7.84913	-10.3058	2012-10-31 04:39:39
2012-10-31 04:49:39	7.71	10.12		2.51541	-7.85933	-10.316
2012-10-31 04:59:39	7.69	10.11		2.52235	-7.83894	-10.3058
2012-10-31 05:09:39	7.72	10.14		2.52929	-7.86952	-10.3364
2012-10-31 05:19:39	7.7	10.12		2.53624	-7.84913	-10.316
2012-10-31 05:29:39	7.74	10.14		2.54318	-7.88991	-10.3364
2012-10-31 05:39:39	7.75	10.16		2.55013	-7.9001	-10.3568	2012-10-31 05:39:39
2012-10-31 05:49:39	7.76	10.17		2.55707	-7.9103	-10.367
2012-10-31 05:59:39	7.76	10.17		2.56402	-7.9103	-10.367
2012-10-31 06:09:39	7.79	10.2		2.57096	-7.94088	-10.3976
2012-10-31 06:19:39	7.79	10.2		2.57791	-7.94088	-10.3976
2012-10-31 06:29:39	7.75	10.16		2.58485	-7.9001	-10.3568
2012-10-31 06:39:39	7.8	10.22		2.59179	-7.95107	-10.4179	2012-10-31 06:39:39
2012-10-31 06:49:39	7.8	10.22		2.59874	-7.95107	-10.4179
2012-10-31 06:59:39	7.82	10.24		2.60568	-7.97146	-10.4383
2012-10-31 07:09:39	7.86	10.25		2.61263	-8.01223	-10.4485
2012-10-31 07:19:39	7.86	10.27		2.61957	-8.01223	-10.4689
2012-10-31 07:29:39	7.86	10.28		2.62652	-8.01223	-10.4791
2012-10-31 07:39:39	7.87	10.29		2.63346	-8.02243	-10.4893	2012-10-31 07:39:39
2012-10-31 07:49:39	7.88	10.28		2.64041	-8.03262	-10.4791
2012-10-31 07:59:39	7.9	10.32		2.64735	-8.05301	-10.5199
2012-10-31 08:09:39	7.93	10.34		2.65429	-8.08359	-10.5403
2012-10-31 08:19:39	7.95	10.36		2.66124	-8.10398	-10.5607
2012-10-31 08:29:39	7.95	10.34		2.66818	-8.10398	-10.5403
2012-10-31 08:39:39	7.98	10.36		2.67513	-8.13456	-10.5607	2012-10-31 08:39:39
2012-10-31 08:49:39	7.7	10.07		2.68207	-7.84913	-10.265
2012-10-31 08:59:39	7.7	10.11		2.68902	-7.84913	-10.3058
2012-10-31 09:09:39	7.65	10.08		2.69596	-7.79817	-10.2752
2012-10-31 09:19:39	7.71	10.12		2.70291	-7.85933	-10.316
2012-10-31 09:29:39	7.68	10.1		2.70985	-7.82875	-10.2956
2012-10-31 09:39:39	7.7	10.11		2.71679	-7.84913	-10.3058	2012-10-31 09:39:39
2012-10-31 09:49:39	7.75	10.17		2.72374	-7.9001	-10.367
2012-10-31 09:59:39	7.82	10.24		2.73068	-7.97146	-10.4383
2012-10-31 10:09:39	7.86	10.27		2.73763	-8.01223	-10.4689
2012-10-31 10:19:39	7.89	10.3		2.74457	-8.04281	-10.4995
2012-10-31 10:29:39	7.92	10.32		2.75152	-8.07339	-10.5199
2012-10-31 10:39:39	7.92	10.33		2.75846	-8.07339	-10.5301	2012-10-31 10:39:39
2012-10-31 10:49:39	7.93	10.35		2.76541	-8.08359	-10.5505
2012-10-31 10:59:39	7.97	10.36		2.77235	-8.12436	-10.5607
2012-10-31 11:09:39	7.97	10.38		2.77929	-8.12436	-10.581
2012-10-31 11:19:39	7.99	10.39		2.78624	-8.14475	-10.5912
2012-10-31 11:29:39	6.93	9.31		2.79318	-7.06422	-9.49032
2012-10-31 11:39:39	6.88	9.34		2.80013	-7.01325	-9.5209	2012-10-31 11:39:39
2012-10-31 11:49:39	6.94	9.39		2.80707	-7.07441	-9.57187
2012-10-31 11:59:39	7	9.44		2.81402	-7.13558	-9.62283
2012-10-31 12:09:39	7.06	9.49		2.82096	-7.19674	-9.6738
2012-10-31 12:19:39	7.13	9.54		2.82791	-7.26809	-9.72477
2012-10-31 12:29:39	7.19	9.6		2.83485	-7.32926	-9.78593
2012-10-31 12:39:39	7.23	9.64		2.84179	-7.37003	-9.82671	2012-10-31 12:39:39
2012-10-31 12:49:39	7.29	9.7		2.84874	-7.43119	-9.88787
2012-10-31 12:59:39	7.33	9.75		2.85568	-7.47197	-9.93884
2012-10-31 13:09:39	7.37	9.78		2.86263	-7.51274	-9.96942
2012-10-31 13:19:39	7.42	9.84		2.86957	-7.56371	-10.0306
2012-10-31 13:29:39	7.47	9.88		2.87652	-7.61468	-10.0714
2012-10-31 13:39:39	7.52	9.93		2.88346	-7.66565	-10.1223	2012-10-31 13:39:39
2012-10-31 13:49:39	7.55	9.97		2.89041	-7.69623	-10.1631
2012-10-31 13:59:39	7.59	10.02		2.89735	-7.737	-10.2141
2012-10-31 14:09:39	7.62	10.04		2.90429	-7.76758	-10.2345
2012-10-31 14:19:39	7.67	10.08		2.91124	-7.81855	-10.2752
2012-10-31 14:29:39	7.69	10.1		2.91818	-7.83894	-10.2956
2012-10-31 14:39:39	7.73	10.13		2.92513	-7.87971	-10.3262	2012-10-31 14:39:39
2012-10-31 14:49:39	7.74	10.16		2.93207	-7.88991	-10.3568
2012-10-31 14:59:39	7.78	10.17		2.93902	-7.93068	-10.367
2012-10-31 15:09:39	7.78	10.21		2.94596	-7.93068	-10.4077
2012-10-31 15:19:39	7.82	10.23		2.95291	-7.97146	-10.4281
2012-10-31 15:29:39	7.86	10.26		2.95985	-8.01223	-10.4587
2012-10-31 15:39:39	7.88	10.28		2.96679	-8.03262	-10.4791	2012-10-31 15:39:39
2012-10-31 15:49:39	7.9	10.3		2.97374	-8.05301	-10.4995
2012-10-31 15:59:39	7.92	10.32		2.98068	-8.07339	-10.5199
2012-10-31 16:09:39	7.95	10.34		2.98763	-8.10398	-10.5403
2012-10-31 16:19:39	7.95	10.36		2.99457	-8.10398	-10.5607
2012-10-31 16:29:39	7.99	10.39		3.00152	-8.14475	-10.5912
2012-10-31 16:39:39	7.99	10.39		3.00846	-8.14475	-10.5912	2012-10-31 16:39:39
2012-10-31 16:49:39	8.03	10.42		3.01541	-8.18552	-10.6218
2012-10-31 16:59:39	8.06	10.45		3.02235	-8.21611	-10.6524
2012-10-31 17:09:39	7.88	10.27		3.02929	-8.03262	-10.4689
2012-10-31 17:19:39	7.9	10.25		3.03624	-8.05301	-10.4485
2012-10-31 17:29:39	7.98	10.36		3.04318	-8.13456	-10.5607
2012-10-31 17:39:39	8.03	10.43		3.05013	-8.18552	-10.632	2012-10-31 17:39:39
2012-10-31 17:49:39	8.06	10.46		3.05707	-8.21611	-10.6626
2012-10-31 17:59:39	8.11	10.48		3.06402	-8.26707	-10.683
2012-10-31 18:09:39	8.13	10.53		3.07096	-8.28746	-10.7339
2012-10-31 18:19:39	8.17	10.56		3.07791	-8.32824	-10.7645
2012-10-31 18:29:39	8.19	10.59		3.08485	-8.34862	-10.7951
2012-10-31 18:39:39	8.21	10.61		3.09179	-8.36901	-10.8155	2012-10-31 18:39:39
2012-10-31 18:49:39	8.24	10.63		3.09874	-8.39959	-10.8359
2012-10-31 18:59:39	8.26	10.63		3.10568	-8.41998	-10.8359
2012-10-31 19:09:39	8.29	10.66		3.11263	-8.45056	-10.8665
2012-10-31 19:19:39	8.31	10.69		3.11957	-8.47095	-10.897
2012-10-31 19:29:39	8.33	10.73		3.12652	-8.49134	-10.9378
2012-10-31 19:39:39	8.35	10.75		3.13346	-8.51172	-10.9582	2012-10-31 19:39:39
2012-10-31 19:49:39	8.35	10.74		3.14041	-8.51172	-10.948
2012-10-31 19:59:39	8.38	10.77		3.14735	-8.5423	-10.9786
2012-10-31 20:09:39	8.42	10.78		3.15429	-8.58308	-10.9888
2012-10-31 20:19:39	8.44	10.82		3.16124	-8.60347	-11.0296
2012-10-31 20:29:39	8.47	10.83		3.16818	-8.63405	-11.0398
2012-10-31 20:39:39	8.48	10.86		3.17513	-8.64424	-11.0703	2012-10-31 20:39:39
2012-10-31 20:49:39	8.51	10.86		3.18207	-8.67482	-11.0703
2012-10-31 20:59:39	8.52	10.9		3.18902	-8.68502	-11.1111
2012-10-31 21:09:39	8.55	10.91		3.19596	-8.7156	-11.1213
2012-10-31 21:19:39	8.57	10.95		3.20291	-8.73598	-11.1621
2012-10-31 21:29:39	8.6	10.98		3.20985	-8.76656	-11.1927
2012-10-31 21:39:39	8.63	10.98		3.21679	-8.79715	-11.1927	2012-10-31 21:39:39
2012-10-31 21:49:39	8.64	10.99		3.22374	-8.80734	-11.2029
2012-10-31 21:59:39	8.66	11.01		3.23068	-8.82773	-11.2232
2012-10-31 22:09:39	8.68	11.02		3.23763	-8.84811	-11.2334
2012-10-31 22:19:39	8.69	11.04		3.24457	-8.85831	-11.2538
2012-10-31 22:29:39	8.72	11.07		3.25152	-8.88889	-11.2844
2012-10-31 22:39:39	8.72	11.11		3.25846	-8.88889	-11.3252	2012-10-31 22:39:39
2012-10-31 22:49:39	8.76	11.11		3.26541	-8.92966	-11.3252
2012-10-31 22:59:39	8.77	11.13		3.27235	-8.93986	-11.3456
2012-10-31 23:09:39	8.77	11.16		3.27929	-8.93986	-11.3761
2012-10-31 23:19:39	8.8	11.18		3.28624	-8.97044	-11.3965
2012-10-31 23:29:39	8.81	11.18		3.29318	-8.98063	-11.3965
2012-10-31 23:39:39	8.83	11.21		3.30013	-9.00102	-11.4271	2012-10-31 23:39:39
2012-10-31 23:49:39	8.82	11.21		3.30707	-8.99083	-11.4271
2012-10-31 23:59:39	8.85	11.23		3.31402	-9.02141	-11.4475
2012-11-01 00:09:39	8.87	11.25		3.32096	-9.04179	-11.4679
2012-11-01 00:19:39	8.89	11.27		3.32791	-9.06218	-11.4883
2012-11-01 00:29:39	8.9	11.29		3.33485	-9.07238	-11.5087
2012-11-01 00:39:39	8.91	11.3		3.34179	-9.08257	-11.5189	2012-11-01 00:39:39
2012-11-01 00:49:39	8.94	11.32		3.34874	-9.11315	-11.5392
2012-11-01 00:59:39	8.96	11.34		3.35568	-9.13354	-11.5596
2012-11-01 01:09:39	8.98	11.37		3.36263	-9.15392	-11.5902
2012-11-01 01:19:39	8.99	11.38		3.36957	-9.16412	-11.6004
2012-11-01 01:29:39	9.01	11.4		3.37652	-9.18451	-11.6208
2012-11-01 01:39:39	9	11.39		3.38346	-9.17431	-11.6106	2012-11-01 01:39:39
2012-11-01 01:49:39	9.03	11.41		3.39041	-9.20489	-11.631
2012-11-01 01:59:39	9.04	11.42		3.39735	-9.21509	-11.6412
2012-11-01 02:09:39	9.07	11.46		3.40429	-9.24567	-11.682
2012-11-01 02:19:39	9.09	11.47		3.41124	-9.26606	-11.6922
2012-11-01 02:29:39	9.1	11.49		3.41818	-9.27625	-11.7125
2012-11-01 02:39:39	9.12	11.51		3.42513	-9.29664	-11.7329	2012-11-01 02:39:39
2012-11-01 02:49:39	9.14	11.53		3.43207	-9.31702	-11.7533
2012-11-01 02:59:39	9.16	11.54		3.43902	-9.33741	-11.7635
2012-11-01 03:09:39	9.16	11.55		3.44596	-9.33741	-11.7737
2012-11-01 03:19:39	9.19	11.55		3.45291	-9.36799	-11.7737
2012-11-01 03:29:39	9.21	11.6		3.45985	-9.38838	-11.8247
2012-11-01 03:39:39	9.21	11.59		3.46679	-9.38838	-11.8145	2012-11-01 03:39:39
2012-11-01 03:49:39	9.2	11.59		3.47374	-9.37819	-11.8145
2012-11-01 03:59:39	9.24	11.62		3.48068	-9.41896	-11.8451
2012-11-01 04:09:39	9.24	11.62		3.48763	-9.41896	-11.8451
2012-11-01 04:19:39	9.26	11.64		3.49457	-9.43935	-11.8654
2012-11-01 04:29:39	9.27	11.64		3.50152	-9.44954	-11.8654
2012-11-01 04:39:39	9.31	11.64		3.50846	-9.49032	-11.8654	2012-11-01 04:39:39
2012-11-01 04:49:39	9.29	11.65		3.51541	-9.46993	-11.8756
2012-11-01 04:59:39	9.33	11.68		3.52235	-9.5107	-11.9062
2012-11-01 05:09:39	9.34	11.72		3.52929	-9.5209	-11.947
2012-11-01 05:19:39	9.36	11.73		3.53624	-9.54128	-11.9572
2012-11-01 05:29:39	9.35	11.74		3.54318	-9.53109	-11.9674
2012-11-01 05:39:39	9.37	11.76		3.55013	-9.55148	-11.9878	2012-11-01 05:39:39
2012-11-01 05:49:39	9.4	11.78		3.55707	-9.58206	-12.0082
2012-11-01 05:59:39	9.42	11.8		3.56402	-9.60245	-12.0285
2012-11-01 06:09:39	9.43	11.81		3.57096	-9.61264	-12.0387
2012-11-01 06:19:39	9.45	11.83		3.57791	-9.63303	-12.0591
2012-11-01 06:29:39	9.47	11.86		3.58485	-9.65341	-12.0897
2012-11-01 06:39:39	9.49	11.87		3.59179	-9.6738	-12.0999	2012-11-01 06:39:39
2012-11-01 06:49:39	9.51	11.89		3.59874	-9.69419	-12.1203
2012-11-01 06:59:39	9.53	11.91		3.60568	-9.71458	-12.1407
2012-11-01 07:09:39	9.55	11.93		3.61263	-9.73496	-12.1611
2012-11-01 07:19:39	9.58	11.96		3.61957	-9.76555	-12.1916
2012-11-01 07:29:39	9.59	11.97		3.62652	-9.77574	-12.2018
2012-11-01 07:39:39	9.59	11.97		3.63346	-9.77574	-12.2018	2012-11-01 07:39:39
2012-11-01 07:49:39	9.61	11.99		3.64041	-9.79613	-12.2222
2012-11-01 07:59:39	9.59	11.95		3.64735	-9.77574	-12.1814
2012-11-01 08:09:39	9.53	11.9		3.65429	-9.71458	-12.1305
2012-11-01 08:19:39	9.53	11.91		3.66124	-9.71458	-12.1407
2012-11-01 08:29:39	9.58	11.96		3.66818	-9.76555	-12.1916
2012-11-01 08:39:39	9.53	11.88		3.67513	-9.71458	-12.1101	2012-11-01 08:39:39
2012-11-01 08:49:39	9.47	11.87		3.68207	-9.65341	-12.0999
2012-11-01 08:59:39	9.18	11.56		3.68902	-9.3578	-11.7839
2012-11-01 09:09:39	8.87	11.28		3.69596	-9.04179	-11.4985
2012-11-01 09:19:39	8.91	11.32		3.70291	-9.08257	-11.5392
2012-11-01 09:29:39	9.01	11.4		3.70985	-9.18451	-11.6208
2012-11-01 09:39:39	9.09	11.47		3.71679	-9.26606	-11.6922	2012-11-01 09:39:39
2012-11-01 09:49:39	9.18	11.55		3.72374	-9.3578	-11.7737
2012-11-01 09:59:39	9.18	11.56		3.73068	-9.3578	-11.7839
2012-11-01 10:09:39	9.26	11.64		3.73763	-9.43935	-11.8654
2012-11-01 10:19:39	9.33	11.71		3.74457	-9.5107	-11.9368
2012-11-01 10:29:39	9.4	11.79		3.75152	-9.58206	-12.0183
2012-11-01 10:39:39	9.43	11.81		3.75846	-9.61264	-12.0387	2012-11-01 10:39:39
2012-11-01 10:49:39	9.45	11.84		3.76541	-9.63303	-12.0693
2012-11-01 10:59:39	9.5	11.89		3.77235	-9.684	-12.1203
2012-11-01 11:09:39	9.54	11.92		3.77929	-9.72477	-12.1509
2012-11-01 11:19:39	9.57	11.96		3.78624	-9.75535	-12.1916
2012-11-01 11:29:39	9.62	11.97		3.79318	-9.80632	-12.2018
2012-11-01 11:39:39	9.64	12.02		3.80013	-9.82671	-12.2528	2012-11-01 11:39:39
2012-11-01 11:49:39	9.67	12.04		3.80707	-9.85729	-12.2732
2012-11-01 11:59:39	9.67	12.05		3.81402	-9.85729	-12.2834
2012-11-01 12:09:39	9.71	12.08		3.82096	-9.89806	-12.314
2012-11-01 12:19:39	9.59	11.98		3.82791	-9.77574	-12.212
2012-11-01 12:29:39	9.65	12.07		3.83485	-9.8369	-12.3038
2012-11-01 12:39:39	9.71	12.12		3.84179	-9.89806	-12.3547	2012-11-01 12:39:39
2012-11-01 12:49:39	9.74	12.13		3.84874	-9.92864	-12.3649
2012-11-01 12:59:39	9.75	12.14		3.85568	-9.93884	-12.3751
2012-11-01 13:09:39	9.79	12.18		3.86263	-9.97961	-12.4159
2012-11-01 13:19:39	9.82	12.2		3.86957	-10.0102	-12.4363
2012-11-01 13:29:39	9.85	12.22		3.87652	-10.0408	-12.4567
2012-11-01 13:39:39	9.88	12.25		3.88346	-10.0714	-12.4873	2012-11-01 13:39:39
2012-11-01 13:49:39	9.91	12.28		3.89041	-10.1019	-12.5178
2012-11-01 13:59:39	9.93	12.32		3.89735	-10.1223	-12.5586
2012-11-01 14:09:39	9.94	12.33		3.90429	-10.1325	-12.5688
2012-11-01 14:19:39	9.99	12.37		3.91124	-10.1835	-12.6096
2012-11-01 14:29:39	10.03	12.39		3.91818	-10.2243	-12.63
2012-11-01 14:39:39	10.05	12.42		3.92513	-10.2446	-12.6606	2012-11-01 14:39:39
2012-11-01 14:49:39	10.07	12.43		3.93207	-10.265	-12.6707
2012-11-01 14:59:39	10.09	12.47		3.93902	-10.2854	-12.7115
2012-11-01 15:09:39	10.11	12.49		3.94596	-10.3058	-12.7319
2012-11-01 15:19:39	10.14	12.52		3.95291	-10.3364	-12.7625
2012-11-01 15:29:39	10.16	12.54		3.95985	-10.3568	-12.7829
2012-11-01 15:39:39	10.19	12.57		3.96679	-10.3874	-12.8135	2012-11-01 15:39:39
2012-11-01 15:49:39	10.2	12.57		3.97374	-10.3976	-12.8135
2012-11-01 15:59:39	10.24	12.62		3.98068	-10.4383	-12.8644
2012-11-01 16:09:39	10.26	12.64		3.98763	-10.4587	-12.8848
2012-11-01 16:19:39	10.27	12.65		3.99457	-10.4689	-12.895
2012-11-01 16:29:39	10.3	12.67		4.00152	-10.4995	-12.9154
2012-11-01 16:39:39	10.31	12.7		4.00846	-10.5097	-12.946	2012-11-01 16:39:39
2012-11-01 16:49:39	10.34	12.73		4.01541	-10.5403	-12.9766
2012-11-01 16:59:39	10.36	12.74		4.02235	-10.5607	-12.9867
2012-11-01 17:09:39	10.35	12.69		4.02929	-10.5505	-12.9358
2012-11-01 17:19:39	10.33	12.69		4.03624	-10.5301	-12.9358
2012-11-01 17:29:39	10.24	12.61		4.04318	-10.4383	-12.8542
2012-11-01 17:39:39	10.22	12.63		4.05013	-10.4179	-12.8746	2012-11-01 17:39:39
2012-11-01 17:49:39	10.3	12.71		4.05707	-10.4995	-12.9562
2012-11-01 17:59:39	10.34	12.73		4.06402	-10.5403	-12.9766
2012-11-01 18:09:39	10.37	12.76		4.07096	-10.5708	-13.0071
2012-11-01 18:19:39	10.38	12.77		4.07791	-10.581	-13.0173
2012-11-01 18:29:39	10.43	12.77		4.08485	-10.632	-13.0173
2012-11-01 18:39:39	10.45	12.84		4.09179	-10.6524	-13.0887	2012-11-01 18:39:39
2012-11-01 18:49:39	10.48	12.87		4.09874	-10.683	-13.1193
2012-11-01 18:59:39	10.51	12.89		4.10568	-10.7136	-13.1397
2012-11-01 19:09:39	10.54	12.91		4.11263	-10.7441	-13.16
2012-11-01 19:19:39	10.57	12.94		4.11957	-10.7747	-13.1906
2012-11-01 19:29:39	10.61	12.98		4.12652	-10.8155	-13.2314
2012-11-01 19:39:39	10.61	12.99		4.13346	-10.8155	-13.2416	2012-11-01 19:39:39
2012-11-01 19:49:39	10.64	13.02		4.14041	-10.8461	-13.2722
2012-11-01 19:59:39	10.67	13.04		4.14735	-10.8767	-13.2926
2012-11-01 20:09:39	10.71	13.08		4.15429	-10.9174	-13.3333
2012-11-01 20:19:39	10.75	13.12		4.16124	-10.9582	-13.3741
2012-11-01 20:29:39	10.79	13.16		4.16818	-10.999	-13.4149
2012-11-01 20:39:39	10.82	13.18		4.17513	-11.0296	-13.4353	2012-11-01 20:39:39
2012-11-01 20:49:39	10.85	13.21		4.18207	-11.0601	-13.4659
2012-11-01 20:59:39	10.91	13.24		4.18902	-11.1213	-13.4964
2012-11-01 21:09:39	10.92	13.29		4.19596	-11.1315	-13.5474
2012-11-01 21:19:39	10.98	13.3		4.20291	-11.1927	-13.5576
2012-11-01 21:29:39	11.01	13.34		4.20985	-11.2232	-13.5984
2012-11-01 21:39:39	11.04	13.37		4.21679	-11.2538	-13.629	2012-11-01 21:39:39
2012-11-01 21:49:39	11.05	13.42		4.22374	-11.264	-13.6799
2012-11-01 21:59:39	11.08	13.45		4.23068	-11.2946	-13.7105
2012-11-01 22:09:39	11.11	13.47		4.23763	-11.3252	-13.7309
2012-11-01 22:19:39	11.14	13.5		4.24457	-11.3558	-13.7615
2012-11-01 22:29:39	11.18	13.55		4.25152	-11.3965	-13.8124
2012-11-01 22:39:39	11.2	13.57		4.25846	-11.4169	-13.8328	2012-11-01 22:39:39
2012-11-01 22:49:39	11.23	13.59		4.26541	-11.4475	-13.8532
2012-11-01 22:59:39	11.26	13.63		4.27235	-11.4781	-13.894
2012-11-01 23:09:39	11.31	13.66		4.27929	-11.5291	-13.9246
2012-11-01 23:19:39	11.35	13.7		4.28624	-11.5698	-13.9653
2012-11-01 23:29:39	11.35	13.72		4.29318	-11.5698	-13.9857
2012-11-01 23:39:39	11.4	13.76		4.30013	-11.6208	-14.0265	2012-11-01 23:39:39
2012-11-01 23:49:39	11.44	13.79		4.30707	-11.6616	-14.0571
2012-11-01 23:59:39	11.48	13.83		4.31402	-11.7023	-14.0979
2012-11-02 00:09:39	11.5	13.86		4.32096	-11.7227	-14.1284
2012-11-02 00:19:39	11.53	13.88		4.32791	-11.7533	-14.1488
2012-11-02 00:29:39	11.56	13.91		4.33485	-11.7839	-14.1794
2012-11-02 00:39:39	11.58	13.94		4.34179	-11.8043	-14.21	2012-11-02 00:39:39
2012-11-02 00:49:39	11.62	13.97		4.34874	-11.8451	-14.2406
2012-11-02 00:59:39	11.64	14.01		4.35568	-11.8654	-14.2813
2012-11-02 01:09:39	11.67	14.03		4.36263	-11.896	-14.3017
2012-11-02 01:19:39	11.7	14.07		4.36957	-11.9266	-14.3425
2012-11-02 01:29:39	11.74	14.1		4.37652	-11.9674	-14.3731
2012-11-02 01:39:39	11.77	14.13		4.38346	-11.998	-14.4037	2012-11-02 01:39:39
2012-11-02 01:49:39	11.8	14.15		4.39041	-12.0285	-14.4241
2012-11-02 01:59:39	11.83	14.18		4.39735	-12.0591	-14.4546
2012-11-02 02:09:39	11.86	14.21		4.40429	-12.0897	-14.4852
2012-11-02 02:19:39	11.89	14.24		4.41124	-12.1203	-14.5158
2012-11-02 02:29:39	11.92	14.27		4.41818	-12.1509	-14.5464
2012-11-02 02:39:39	11.95	14.31		4.42513	-12.1814	-14.5872	2012-11-02 02:39:39
2012-11-02 02:49:39	11.98	14.33		4.43207	-12.212	-14.6075
2012-11-02 02:59:39	12.01	14.37		4.43902	-12.2426	-14.6483
2012-11-02 03:09:39	12.04	14.4		4.44596	-12.2732	-14.6789
2012-11-02 03:19:39	12.05	14.41		4.45291	-12.2834	-14.6891
2012-11-02 03:29:39	12.07	14.43		4.45985	-12.3038	-14.7095
2012-11-02 03:39:39	12.1	14.46		4.46679	-12.3344	-14.7401	2012-11-02 03:39:39
2012-11-02 03:49:39	12.11	14.48		4.47374	-12.3445	-14.7604
2012-11-02 03:59:39	12.13	14.49		4.48068	-12.3649	-14.7706
2012-11-02 04:09:39	12.15	14.52		4.48763	-12.3853	-14.8012
2012-11-02 04:19:39	12.18	14.51		4.49457	-12.4159	-14.791
2012-11-02 04:29:39	12.21	14.58		4.50152	-12.4465	-14.8624
2012-11-02 04:39:39	12.23	14.59		4.50846	-12.4669	-14.8726	2012-11-02 04:39:39
2012-11-02 04:49:39	12.27	14.62		4.51541	-12.5076	-14.9032
2012-11-02 04:59:39	12.29	14.65		4.52235	-12.528	-14.9337
2012-11-02 05:09:39	12.32	14.66		4.52929	-12.5586	-14.9439
2012-11-02 05:19:39	12.35	14.7		4.53624	-12.5892	-14.9847
2012-11-02 05:29:39	12.37	14.73		4.54318	-12.6096	-15.0153
2012-11-02 05:39:39	12.29	14.74		4.55013	-12.528	-15.0255	2012-11-02 05:39:39
2012-11-02 05:49:39	12.43	14.75		4.55707	-12.6707	-15.0357
2012-11-02 05:59:39	12.46	14.78		4.56402	-12.7013	-15.0663
2012-11-02 06:09:39	12.5	14.85		4.57096	-12.7421	-15.1376
2012-11-02 06:19:39	12.51	14.87		4.57791	-12.7523	-15.158
2012-11-02 06:29:39	12.55	14.9		4.58485	-12.7931	-15.1886
2012-11-02 06:39:39	12.56	14.92		4.59179	-12.8033	-15.209	2012-11-02 06:39:39
2012-11-02 06:49:39	12.61	14.94		4.59874	-12.8542	-15.2294
2012-11-02 06:59:39	12.64	14.97		4.60568	-12.8848	-15.2599
2012-11-02 07:09:39	12.65	15.01		4.61263	-12.895	-15.3007
2012-11-02 07:19:39	12.69	15.03		4.61957	-12.9358	-15.3211
2012-11-02 07:29:39	12.71	15.06		4.62652	-12.9562	-15.3517
2012-11-02 07:39:39	12.72	15.08		4.63346	-12.9664	-15.3721	2012-11-02 07:39:39
2012-11-02 07:49:39	12.75	15.1		4.64041	-12.9969	-15.3925
2012-11-02 07:59:39	12.75	15.09		4.64735	-12.9969	-15.3823
2012-11-02 08:09:39	12.78	15.15		4.65429	-13.0275	-15.4434
2012-11-02 08:19:39	12.79	15.16		4.66124	-13.0377	-15.4536
2012-11-02 08:29:39	12.81	15.19		4.66818	-13.0581	-15.4842
2012-11-02 08:39:39	12.83	15.21		4.67513	-13.0785	-15.5046	2012-11-02 08:39:39
2012-11-02 08:49:39	12.87	15.23		4.68207	-13.1193	-15.525
2012-11-02 08:59:39	12.88	15.24		4.68902	-13.1295	-15.5352
2012-11-02 09:09:39	12.89	15.27		4.69596	-13.1397	-15.5657
2012-11-02 09:19:39	12.9	15.28		4.70291	-13.1498	-15.5759
2012-11-02 09:29:39	12.93	15.27		4.70985	-13.1804	-15.5657
2012-11-02 09:39:39	12.95	15.32		4.71679	-13.2008	-15.6167	2012-11-02 09:39:39
2012-11-02 09:49:39	12.97	15.34		4.72374	-13.2212	-15.6371
2012-11-02 09:59:39	13	15.34		4.73068	-13.2518	-15.6371
2012-11-02 10:09:39	13.01	15.37		4.73763	-13.262	-15.6677
2012-11-02 10:19:39	13.01	15.37		4.74457	-13.262	-15.6677
2012-11-02 10:29:39	13.05	15.4		4.75152	-13.3028	-15.6983
2012-11-02 10:39:39	13.08	15.4		4.75846	-13.3333	-15.6983	2012-11-02 10:39:39
2012-11-02 10:49:39	13.1	15.42		4.76541	-13.3537	-15.7187
2012-11-02 10:59:39	13.08	15.44		4.77235	-13.3333	-15.739
2012-11-02 11:09:39	13.11	15.47		4.77929	-13.3639	-15.7696
2012-11-02 11:19:39	13.13	15.51		4.78624	-13.3843	-15.8104
2012-11-02 11:29:39	13.19	15.53		4.79318	-13.4455	-15.8308
2012-11-02 11:39:39	13.18	15.55		4.80013	-13.4353	-15.8512	2012-11-02 11:39:39
2012-11-02 11:49:39	13.21	15.58		4.80707	-13.4659	-15.8818
2012-11-02 11:59:39	13.26	15.61		4.81402	-13.5168	-15.9123
2012-11-02 12:09:39	13.26	15.62		4.82096	-13.5168	-15.9225
2012-11-02 12:19:39	13.27	15.64		4.82791	-13.527	-15.9429
2012-11-02 12:29:39	13.28	15.65		4.83485	-13.5372	-15.9531
2012-11-02 12:39:39	13.33	15.7		4.84179	-13.5882	-16.0041	2012-11-02 12:39:39
2012-11-02 12:49:39	13.33	15.7		4.84874	-13.5882	-16.0041
2012-11-02 12:59:39	13.37	15.73		4.85568	-13.629	-16.0347
2012-11-02 13:09:39	13.4	15.76		4.86263	-13.6595	-16.0652
2012-11-02 13:19:39	13.41	15.78		4.86957	-13.6697	-16.0856
2012-11-02 13:29:39	13.43	15.8		4.87652	-13.6901	-16.106
2012-11-02 13:39:39	13.44	15.82		4.88346	-13.7003	-16.1264	2012-11-02 13:39:39
2012-11-02 13:49:39	13.48	15.84		4.89041	-13.7411	-16.1468
2012-11-02 13:59:39	13.51	15.88		4.89735	-13.7717	-16.1876
2012-11-02 14:09:39	13.54	15.89		4.90429	-13.8022	-16.1978
2012-11-02 14:19:39	13.55	15.91		4.91124	-13.8124	-16.2181
2012-11-02 14:29:39	13.57	15.93		4.91818	-13.8328	-16.2385
2012-11-02 14:39:39	13.6	15.97		4.92513	-13.8634	-16.2793	2012-11-02 14:39:39
2012-11-02 14:49:39	13.29	15.65		4.93207	-13.5474	-15.9531
2012-11-02 14:59:39	13.43	15.79		4.93902	-13.6901	-16.0958
2012-11-02 15:09:39	13.51	15.87		4.94596	-13.7717	-16.1774
2012-11-02 15:19:39	13.57	15.93		4.95291	-13.8328	-16.2385
2012-11-02 15:29:39	13.6	15.95		4.95985	-13.8634	-16.2589
2012-11-02 15:39:39	13.62	15.99		4.96679	-13.8838	-16.2997	2012-11-02 15:39:39
2012-11-02 15:49:39	13.66	16		4.97374	-13.9246	-16.3099
2012-11-02 15:59:39	13.68	16.04		4.98068	-13.945	-16.3507
2012-11-02 16:09:39	13.71	16.07		4.98763	-13.9755	-16.3812
2012-11-02 16:19:39	13.73	16.09		4.99457	-13.9959	-16.4016
2012-11-02 16:29:39	13.78	16.11		5.00152	-14.0469	-16.422
2012-11-02 16:39:39	13.81	16.13		5.00846	-14.0775	-16.4424	2012-11-02 16:39:39
2012-11-02 16:49:39	13.83	16.15		5.01541	-14.0979	-16.4628
2012-11-02 16:59:39	13.85	16.2		5.02235	-14.1182	-16.5138
2012-11-02 17:09:39	13.89	16.24		5.02929	-14.159	-16.5545
2012-11-02 17:19:39	13.91	16.27		5.03624	-14.1794	-16.5851
2012-11-02 17:29:39	13.96	16.28		5.04318	-14.2304	-16.5953
2012-11-02 17:39:39	14	16.32		5.05013	-14.2712	-16.6361	2012-11-02 17:39:39
2012-11-02 17:49:39	14.01	16.36		5.05707	-14.2813	-16.6769
2012-11-02 17:59:39	14.06	16.37		5.06402	-14.3323	-16.6871
2012-11-02 18:09:39	14.08	16.41		5.07096	-14.3527	-16.7278
2012-11-02 18:19:39	14.1	16.45		5.07791	-14.3731	-16.7686
2012-11-02 18:29:39	14.16	16.47		5.08485	-14.4343	-16.789
2012-11-02 18:39:39	14.18	16.49		5.09179	-14.4546	-16.8094	2012-11-02 18:39:39
2012-11-02 18:49:39	14.23	16.54		5.09874	-14.5056	-16.8603
2012-11-02 18:59:39	14.26	16.56		5.10568	-14.5362	-16.8807
2012-11-02 19:09:39	14.27	16.61		5.11263	-14.5464	-16.9317
2012-11-02 19:19:39	14.32	16.64		5.11957	-14.5973	-16.9623
2012-11-02 19:29:39	14.35	16.68		5.12652	-14.6279	-17.0031
2012-11-02 19:39:39	14.39	16.7		5.13346	-14.6687	-17.0234	2012-11-02 19:39:39
2012-11-02 19:49:39	14.41	16.73		5.14041	-14.6891	-17.054
2012-11-02 19:59:39	14.45	16.76		5.14735	-14.7299	-17.0846
2012-11-02 20:09:39	14.48	16.81		5.15429	-14.7604	-17.1356
2012-11-02 20:19:39	14.48	16.79		5.16124	-14.7604	-17.1152
2012-11-02 20:29:39	14.5	16.83		5.16818	-14.7808	-17.156
2012-11-02 20:39:39	14.55	16.86		5.17513	-14.8318	-17.1865	2012-11-02 20:39:39
2012-11-02 20:49:39	14.59	16.92		5.18207	-14.8726	-17.2477
2012-11-02 20:59:39	14.63	16.94		5.18902	-14.9134	-17.2681
2012-11-02 21:09:39	14.66	16.98		5.19596	-14.9439	-17.3089
2012-11-02 21:19:39	14.7	17		5.20291	-14.9847	-17.3293
2012-11-02 21:29:39	14.73	17.06		5.20985	-15.0153	-17.3904
2012-11-02 21:39:39	14.77	17.09		5.21679	-15.0561	-17.421	2012-11-02 21:39:39
2012-11-02 21:49:39	14.8	17.12		5.22374	-15.0866	-17.4516
2012-11-02 21:59:39	14.82	17.15		5.23068	-15.107	-17.4822
2012-11-02 22:09:39	14.87	17.19		5.23763	-15.158	-17.5229
2012-11-02 22:19:39	14.91	17.2		5.24457	-15.1988	-17.5331
2012-11-02 22:29:39	14.93	17.26		5.25152	-15.2192	-17.5943
2012-11-02 22:39:39	14.97	17.29		5.25846	-15.2599	-17.6249	2012-11-02 22:39:39
2012-11-02 22:49:39	15	17.32		5.26541	-15.2905	-17.6555
2012-11-02 22:59:39	15.03	17.34		5.27235	-15.3211	-17.6758
2012-11-02 23:09:39	15.07	17.39		5.27929	-15.3619	-17.7268
2012-11-02 23:19:39	15.1	17.42		5.28624	-15.3925	-17.7574
2012-11-02 23:29:39	15.13	17.46		5.29318	-15.423	-17.7982
2012-11-02 23:39:39	15.18	17.49		5.30013	-15.474	-17.8287	2012-11-02 23:39:39
2012-11-02 23:49:39	15.2	17.52		5.30707	-15.4944	-17.8593
2012-11-02 23:59:39	15.24	17.56		5.31402	-15.5352	-17.9001
2012-11-03 00:09:39	15.26	17.58		5.32096	-15.5556	-17.9205
2012-11-03 00:19:39	15.3	17.62		5.32791	-15.5963	-17.9613
2012-11-03 00:29:39	15.33	17.65		5.33485	-15.6269	-17.9918
2012-11-03 00:39:39	15.38	17.69		5.34179	-15.6779	-18.0326	2012-11-03 00:39:39
2012-11-03 00:49:39	15.41	17.73		5.34874	-15.7085	-18.0734
2012-11-03 00:59:39	15.43	17.75		5.35568	-15.7288	-18.0938
2012-11-03 01:09:39	15.47	17.79		5.36263	-15.7696	-18.1346
2012-11-03 01:19:39	15.51	17.82		5.36957	-15.8104	-18.1651
2012-11-03 01:29:39	15.55	17.86		5.37652	-15.8512	-18.2059
2012-11-03 01:39:39	15.59	17.92		5.38346	-15.8919	-18.2671	2012-11-03 01:39:39
2012-11-03 01:49:39	15.62	17.94		5.39041	-15.9225	-18.2875
2012-11-03 01:59:39	15.64	17.97		5.39735	-15.9429	-18.318
2012-11-03 02:09:39	15.67	17.98		5.40429	-15.9735	-18.3282
2012-11-03 02:19:39	15.71	18.04		5.41124	-16.0143	-18.3894
2012-11-03 02:29:39	15.73	18.06		5.41818	-16.0347	-18.4098
2012-11-03 02:39:39	15.78	18.1		5.42513	-16.0856	-18.4506	2012-11-03 02:39:39
2012-11-03 02:49:39	15.82	18.14		5.43207	-16.1264	-18.4913
2012-11-03 02:59:39	15.85	18.16		5.43902	-16.157	-18.5117
2012-11-03 03:09:39	15.88	18.2		5.44596	-16.1876	-18.5525
2012-11-03 03:19:39	15.91	18.24		5.45291	-16.2181	-18.5933
2012-11-03 03:29:39	15.95	18.27		5.45985	-16.2589	-18.6239
2012-11-03 03:39:39	15.98	18.3		5.46679	-16.2895	-18.6544	2012-11-03 03:39:39
2012-11-03 03:49:39	16.01	18.33		5.47374	-16.3201	-18.685
2012-11-03 03:59:39	16.04	18.36		5.48068	-16.3507	-18.7156
2012-11-03 04:09:39	16.07	18.4		5.48763	-16.3812	-18.7564
2012-11-03 04:19:39	16.1	18.42		5.49457	-16.4118	-18.7768
2012-11-03 04:29:39	16.15	18.47		5.50152	-16.4628	-18.8277
2012-11-03 04:39:39	16.18	18.5		5.50846	-16.4934	-18.8583	2012-11-03 04:39:39
2012-11-03 04:49:39	16.21	18.53		5.51541	-16.524	-18.8889
2012-11-03 04:59:39	16.24	18.57		5.52235	-16.5545	-18.9297
2012-11-03 05:09:39	16.27	18.59		5.52929	-16.5851	-18.9501
2012-11-03 05:19:39	16.24	18.57		5.53624	-16.5545	-18.9297
2012-11-03 05:29:39	16.31	18.64		5.54318	-16.6259	-19.001
2012-11-03 05:39:39	16.35	18.67		5.55013	-16.6667	-19.0316	2012-11-03 05:39:39
2012-11-03 05:49:39	16.38	18.7		5.55707	-16.6972	-19.0622
2012-11-03 05:59:39	16.42	18.74		5.56402	-16.738	-19.103
2012-11-03 06:09:39	16.44	18.76		5.57096	-16.7584	-19.1233
2012-11-03 06:19:39	16.48	18.8		5.57791	-16.7992	-19.1641
2012-11-03 06:29:39	16.5	18.84		5.58485	-16.8196	-19.2049
2012-11-03 06:39:39	16.53	18.86		5.59179	-16.8502	-19.2253	2012-11-03 06:39:39
2012-11-03 06:49:39	16.56	18.89		5.59874	-16.8807	-19.2559
2012-11-03 06:59:39	16.6	18.92		5.60568	-16.9215	-19.2864
2012-11-03 07:09:39	16.63	18.95		5.61263	-16.9521	-19.317
2012-11-03 07:19:39	16.66	18.97		5.61957	-16.9827	-19.3374
2012-11-03 07:29:39	16.69	19.01		5.62652	-17.0133	-19.3782
2012-11-03 07:39:39	16.72	19.04		5.63346	-17.0438	-19.4088	2012-11-03 07:39:39
2012-11-03 07:49:39	16.76	19.09		5.64041	-17.0846	-19.4597
2012-11-03 07:59:39	16.79	19.11		5.64735	-17.1152	-19.4801
2012-11-03 08:09:39	16.82	19.14		5.65429	-17.1458	-19.5107
2012-11-03 08:19:39	16.86	19.18		5.66124	-17.1865	-19.5515
2012-11-03 08:29:39	16.9	19.19		5.66818	-17.2273	-19.5617
2012-11-03 08:39:39	16.92	19.23		5.67513	-17.2477	-19.6024	2012-11-03 08:39:39
2012-11-03 08:49:39	16.97	19.24		5.68207	-17.2987	-19.6126
2012-11-03 08:59:39	16.99	19.31		5.68902	-17.3191	-19.684
2012-11-03 09:09:39	17.02	19.32		5.69596	-17.3496	-19.6942
2012-11-03 09:19:39	17.06	19.35		5.70291	-17.3904	-19.7248
2012-11-03 09:29:39	17.09	19.41		5.70985	-17.421	-19.7859
2012-11-03 09:39:39	17.13	19.41		5.71679	-17.4618	-19.7859	2012-11-03 09:39:39
2012-11-03 09:49:39	17.14	19.46		5.72374	-17.472	-19.8369
2012-11-03 09:59:39	17.17	19.49		5.73068	-17.5025	-19.8675
2012-11-03 10:09:39	17.2	19.53		5.73763	-17.5331	-19.9083
2012-11-03 10:19:39	17.23	19.55		5.74457	-17.5637	-19.9286
2012-11-03 10:29:39	17.19	19.51		5.75152	-17.5229	-19.8879
2012-11-03 10:39:39	17.27	19.58		5.75846	-17.6045	-19.9592	2012-11-03 10:39:39
2012-11-03 10:49:39	17.31	19.63		5.76541	-17.6453	-20.0102
2012-11-03 10:59:39	17.34	19.65		5.77235	-17.6758	-20.0306
2012-11-03 11:09:39	17.38	19.69		5.77929	-17.7166	-20.0714
2012-11-03 11:19:39	17.42	19.7		5.78624	-17.7574	-20.0815
2012-11-03 11:29:39	17.45	19.76		5.79318	-17.788	-20.1427
2012-11-03 11:39:39	17.48	19.76		5.80013	-17.8186	-20.1427	2012-11-03 11:39:39
2012-11-03 11:49:39	17.5	19.82		5.80707	-17.8389	-20.2039
2012-11-03 11:59:39	17.53	19.84		5.81402	-17.8695	-20.2243
2012-11-03 12:09:39	17.56	19.87		5.82096	-17.9001	-20.2548
2012-11-03 12:19:39	17.57	19.88		5.82791	-17.9103	-20.265
2012-11-03 12:29:39	17.6	19.92		5.83485	-17.9409	-20.3058
2012-11-03 12:39:39	17.64	19.95		5.84179	-17.9817	-20.3364	2012-11-03 12:39:39
2012-11-03 12:49:39	17.66	19.97		5.84874	-18.002	-20.3568
2012-11-03 12:59:39	17.7	19.99		5.85568	-18.0428	-20.3772
2012-11-03 13:09:39	17.74	20.01		5.86263	-18.0836	-20.3976
2012-11-03 13:19:39	17.75	20.07		5.86957	-18.0938	-20.4587
2012-11-03 13:29:39	17.79	20.1		5.87652	-18.1346	-20.4893
2012-11-03 13:39:39	17.82	20.13		5.88346	-18.1651	-20.5199	2012-11-03 13:39:39
2012-11-03 13:49:39	17.86	20.14		5.89041	-18.2059	-20.5301
2012-11-03 13:59:39	17.88	20.18		5.89735	-18.2263	-20.5708
2012-11-03 14:09:39	17.92	20.21		5.90429	-18.2671	-20.6014
2012-11-03 14:19:39	17.94	20.25		5.91124	-18.2875	-20.6422
2012-11-03 14:29:39	17.96	20.28		5.91818	-18.3078	-20.6728
2012-11-03 14:39:39	18	20.31		5.92513	-18.3486	-20.7034	2012-11-03 14:39:39
2012-11-03 14:49:39	18.03	20.35		5.93207	-18.3792	-20.7441
2012-11-03 14:59:39	18.07	20.38		5.93902	-18.42	-20.7747
2012-11-03 15:09:39	18.1	20.4		5.94596	-18.4506	-20.7951
2012-11-03 15:19:39	17.93	20.24		5.95291	-18.2773	-20.632
2012-11-03 15:29:39	17.9	20.22		5.95985	-18.2467	-20.6116
2012-11-03 15:39:39	18.05	20.37		5.96679	-18.3996	-20.7645	2012-11-03 15:39:39
2012-11-03 15:49:39	18.1	20.43		5.97374	-18.4506	-20.8257
2012-11-03 15:59:39	18.13	20.47		5.98068	-18.4811	-20.8665
2012-11-03 16:09:39	18.16	20.5		5.98763	-18.5117	-20.897
2012-11-03 16:19:39	18.19	20.52		5.99457	-18.5423	-20.9174
2012-11-03 16:29:39	18.23	20.56		6.00152	-18.5831	-20.9582
2012-11-03 16:39:39	18.25	20.59		6.00846	-18.6035	-20.9888	2012-11-03 16:39:39
2012-11-03 16:49:39	18.29	20.62		6.01541	-18.6442	-21.0194
2012-11-03 16:59:39	18.32	20.66		6.02235	-18.6748	-21.0601
2012-11-03 17:09:39	18.36	20.7		6.02929	-18.7156	-21.1009
2012-11-03 17:19:39	18.39	20.72		6.03624	-18.7462	-21.1213
2012-11-03 17:29:39	18.43	20.76		6.04318	-18.787	-21.1621
2012-11-03 17:39:39	18.45	20.79		6.05013	-18.8073	-21.1927	2012-11-03 17:39:39
2012-11-03 17:49:39	18.49	20.82		6.05707	-18.8481	-21.2232
2012-11-03 17:59:39	18.52	20.85		6.06402	-18.8787	-21.2538
2012-11-03 18:09:39	18.55	20.88		6.07096	-18.9093	-21.2844
2012-11-03 18:19:39	18.58	20.91		6.07791	-18.9399	-21.315
2012-11-03 18:29:39	18.6	20.92		6.08485	-18.9602	-21.3252
2012-11-03 18:39:39	18.64	20.95		6.09179	-19.001	-21.3558	2012-11-03 18:39:39
2012-11-03 18:49:39	18.67	20.99		6.09874	-19.0316	-21.3965
2012-11-03 18:59:39	18.7	21.01		6.10568	-19.0622	-21.4169
2012-11-03 19:09:39	18.74	21.05		6.11263	-19.103	-21.4577
2012-11-03 19:19:39	18.78	21.1		6.11957	-19.1437	-21.5087
2012-11-03 19:29:39	18.79	21.1		6.12652	-19.1539	-21.5087
2012-11-03 19:39:39	18.84	21.15		6.13346	-19.2049	-21.5596	2012-11-03 19:39:39
2012-11-03 19:49:39	18.87	21.16		6.14041	-19.2355	-21.5698
2012-11-03 19:59:39	18.91	21.2		6.14735	-19.2762	-21.6106
2012-11-03 20:09:39	18.94	21.25		6.15429	-19.3068	-21.6616
2012-11-03 20:19:39	18.97	21.25		6.16124	-19.3374	-21.6616
2012-11-03 20:29:39	19.01	21.32		6.16818	-19.3782	-21.7329
2012-11-03 20:39:39	19.05	21.35		6.17513	-19.419	-21.7635	2012-11-03 20:39:39
2012-11-03 20:49:39	19.08	21.39		6.18207	-19.4495	-21.8043
2012-11-03 20:59:39	19.13	21.43		6.18902	-19.5005	-21.8451
2012-11-03 21:09:39	19.16	21.45		6.19596	-19.5311	-21.8654
2012-11-03 21:19:39	19.2	21.49		6.20291	-19.5719	-21.9062
2012-11-03 21:29:39	19.24	21.55		6.20985	-19.6126	-21.9674
2012-11-03 21:39:39	19.29	21.58		6.21679	-19.6636	-21.998	2012-11-03 21:39:39
2012-11-03 21:49:39	19.32	21.63		6.22374	-19.6942	-22.0489
2012-11-03 21:59:39	19.38	21.65		6.23068	-19.7554	-22.0693
2012-11-03 22:09:39	19.41	21.7		6.23763	-19.7859	-22.1203
2012-11-03 22:19:39	19.45	21.76		6.24457	-19.8267	-22.1814
2012-11-03 22:29:39	19.47	21.79		6.25152	-19.8471	-22.212
2012-11-03 22:39:39	19.55	21.83		6.25846	-19.9286	-22.2528	2012-11-03 22:39:39
2012-11-03 22:49:39	19.57	21.87		6.26541	-19.949	-22.2936
2012-11-03 22:59:39	19.62	21.92		6.27235	-20	-22.3445
2012-11-03 23:09:39	19.65	21.95		6.27929	-20.0306	-22.3751
2012-11-03 23:19:39	19.71	22		6.28624	-20.0917	-22.4261
2012-11-03 23:29:39	19.75	22.04		6.29318	-20.1325	-22.4669
2012-11-03 23:39:39	19.79	22.09		6.30013	-20.1733	-22.5178	2012-11-03 23:39:39
2012-11-03 23:49:39	19.83	22.12		6.30707	-20.2141	-22.5484
2012-11-03 23:59:39	19.88	22.18		6.31402	-20.265	-22.6096
2012-11-04 00:09:39	19.93	22.21		6.32096	-20.316	-22.6402
2012-11-04 00:19:39	19.95	22.26		6.32791	-20.3364	-22.6911
2012-11-04 00:29:39	20	22.29		6.33485	-20.3874	-22.7217
2012-11-04 00:39:39	20.06	22.34		6.34179	-20.4485	-22.7727	2012-11-04 00:39:39
2012-11-04 00:49:39	20.07	22.37		6.34874	-20.4587	-22.8033
2012-11-04 00:59:39	20.12	22.42		6.35568	-20.5097	-22.8542
2012-11-04 01:09:39	20.16	22.46		6.36263	-20.5505	-22.895
2012-11-04 01:19:39	20.21	22.51		6.36957	-20.6014	-22.946
2012-11-04 01:29:39	20.25	22.55		6.37652	-20.6422	-22.9867
2012-11-04 01:39:39	20.29	22.58		6.38346	-20.683	-23.0173	2012-11-04 01:39:39
2012-11-04 01:49:39	20.33	22.63		6.39041	-20.7238	-23.0683
2012-11-04 01:59:39	20.37	22.67		6.39735	-20.7645	-23.1091
2012-11-04 02:09:39	20.42	22.72		6.40429	-20.8155	-23.16
2012-11-04 02:19:39	20.45	22.74		6.41124	-20.8461	-23.1804
2012-11-04 02:29:39	20.49	22.8		6.41818	-20.8869	-23.2416
2012-11-04 02:39:39	20.52	22.82		6.42513	-20.9174	-23.262	2012-11-04 02:39:39
2012-11-04 02:49:39	20.57	22.87		6.43207	-20.9684	-23.3129
2012-11-04 02:59:39	20.61	22.91		6.43902	-21.0092	-23.3537
2012-11-04 03:09:39	20.65	22.96		6.44596	-21.0499	-23.4047
2012-11-04 03:19:39	20.68	22.99		6.45291	-21.0805	-23.4353
2012-11-04 03:29:39	20.73	23.03		6.45985	-21.1315	-23.476
2012-11-04 03:39:39	20.77	23.07		6.46679	-21.1723	-23.5168	2012-11-04 03:39:39
2012-11-04 03:49:39	20.81	23.11		6.47374	-21.213	-23.5576
2012-11-04 03:59:39	20.86	23.15		6.48068	-21.264	-23.5984
2012-11-04 04:09:39	20.9	23.19		6.48763	-21.3048	-23.6391
2012-11-04 04:19:39	20.93	23.24		6.49457	-21.3354	-23.6901
2012-11-04 04:29:39	20.98	23.28		6.50152	-21.3863	-23.7309
2012-11-04 04:39:39	21.02	23.32		6.50846	-21.4271	-23.7717	2012-11-04 04:39:39
2012-11-04 04:49:39	21.06	23.37		6.51541	-21.4679	-23.8226
2012-11-04 04:59:39	21.1	23.41		6.52235	-21.5087	-23.8634
2012-11-04 05:09:39	21.15	23.44		6.52929	-21.5596	-23.894
2012-11-04 05:19:39	21.19	23.49		6.53624	-21.6004	-23.945
2012-11-04 05:29:39	21.23	23.53		6.54318	-21.6412	-23.9857
2012-11-04 05:39:39	21.26	23.57		6.55013	-21.6718	-24.0265	2012-11-04 05:39:39
2012-11-04 05:49:39	21.3	23.61		6.55707	-21.7125	-24.0673
2012-11-04 05:59:39	21.34	23.64		6.56402	-21.7533	-24.0979
2012-11-04 06:09:39	21.38	23.68		6.57096	-21.7941	-24.1386
2012-11-04 06:19:39	21.42	23.72		6.57791	-21.8349	-24.1794
2012-11-04 06:29:39	21.47	23.77		6.58485	-21.8858	-24.2304
2012-11-04 06:39:39	21.51	23.8		6.59179	-21.9266	-24.261	2012-11-04 06:39:39
2012-11-04 06:49:39	21.54	23.84		6.59874	-21.9572	-24.3017
2012-11-04 06:59:39	21.57	23.87		6.60568	-21.9878	-24.3323
2012-11-04 07:09:39	21.61	23.91		6.61263	-22.0285	-24.3731
2012-11-04 07:19:39	21.65	23.95		6.61957	-22.0693	-24.4139
2012-11-04 07:29:39	21.69	23.99		6.62652	-22.1101	-24.4546
2012-11-04 07:39:39	21.72	24.03		6.63346	-22.1407	-24.4954	2012-11-04 07:39:39
2012-11-04 07:49:39	21.77	24.06		6.64041	-22.1916	-24.526
2012-11-04 07:59:39	21.79	24.1		6.64735	-22.212	-24.5668
2012-11-04 08:09:39	21.84	24.14		6.65429	-22.263	-24.6075
2012-11-04 08:19:39	21.86	24.18		6.66124	-22.2834	-24.6483
2012-11-04 08:29:39	21.9	24.21		6.66818	-22.3242	-24.6789
2012-11-04 08:39:39	21.93	24.25		6.67513	-22.3547	-24.7197	2012-11-04 08:39:39
2012-11-04 08:49:39	21.97	24.28		6.68207	-22.3955	-24.7503
2012-11-04 08:59:39	22.01	24.29		6.68902	-22.4363	-24.7604
2012-11-04 09:09:39	22.03	24.32		6.69596	-22.4567	-24.791
2012-11-04 09:19:39	22.04	24.36		6.70291	-22.4669	-24.8318
2012-11-04 09:29:39	22.09	24.37		6.70985	-22.5178	-24.842
2012-11-04 09:39:39	22.12	24.42		6.71679	-22.5484	-24.893	2012-11-04 09:39:39
2012-11-04 09:49:39	22.15	24.43		6.72374	-22.579	-24.9032
2012-11-04 09:59:39	22.18	24.49		6.73068	-22.6096	-24.9643
2012-11-04 10:09:39	22.22	24.51		6.73763	-22.6504	-24.9847
2012-11-04 10:19:39	22.24	24.55		6.74457	-22.6707	-25.0255
2012-11-04 10:29:39	22.29	24.57		6.75152	-22.7217	-25.0459
2012-11-04 10:39:39	22.31	24.61		6.75846	-22.7421	-25.0866	2012-11-04 10:39:39
2012-11-04 10:49:39	22.35	24.63		6.76541	-22.7829	-25.107
2012-11-04 10:59:39	22.39	24.66		6.77235	-22.8236	-25.1376
2012-11-04 11:09:39	22.41	24.72		6.77929	-22.844	-25.1988
2012-11-04 11:19:39	22.45	24.76		6.78624	-22.8848	-25.2396
2012-11-04 11:29:39	22.45	24.74		6.79318	-22.8848	-25.2192
2012-11-04 11:39:39	22.49	24.8		6.80013	-22.9256	-25.2803	2012-11-04 11:39:39
2012-11-04 11:49:39	22.51	24.82		6.80707	-22.946	-25.3007
2012-11-04 11:59:39	22.55	24.85		6.81402	-22.9867	-25.3313
2012-11-04 12:09:39	22.58	24.89		6.82096	-23.0173	-25.3721
2012-11-04 12:19:39	22.62	24.92		6.82791	-23.0581	-25.4027
2012-11-04 12:29:39	22.65	24.95		6.83485	-23.0887	-25.4332
2012-11-04 12:39:39	22.68	24.99		6.84179	-23.1193	-25.474	2012-11-04 12:39:39
2012-11-04 12:49:39	22.72	25.02		6.84874	-23.16	-25.5046
2012-11-04 12:59:39	22.78	25.08		6.85568	-23.2212	-25.5657
2012-11-04 13:09:39	22.78	25.08		6.86263	-23.2212	-25.5657
2012-11-04 13:19:39	22.83	25.13		6.86957	-23.2722	-25.6167
2012-11-04 13:29:39	22.85	25.15		6.87652	-23.2926	-25.6371
2012-11-04 13:39:39	22.88	25.18		6.88346	-23.3231	-25.6677	2012-11-04 13:39:39
2012-11-04 13:49:39	22.94	25.23		6.89041	-23.3843	-25.7187
2012-11-04 13:59:39	22.96	25.26		6.89735	-23.4047	-25.7492
2012-11-04 14:09:39	22.98	25.3		6.90429	-23.4251	-25.79
2012-11-04 14:19:39	23	25.31		6.91124	-23.4455	-25.8002
2012-11-04 14:29:39	23.05	25.36		6.91818	-23.4964	-25.8512
2012-11-04 14:39:39	23.1	25.4		6.92513	-23.5474	-25.8919	2012-11-04 14:39:39
2012-11-04 14:49:39	23.14	25.43		6.93207	-23.5882	-25.9225
2012-11-04 14:59:39	23.18	25.47		6.93902	-23.629	-25.9633
2012-11-04 15:09:39	23.21	25.5		6.94596	-23.6595	-25.9939
2012-11-04 15:19:39	23.25	25.55		6.95291	-23.7003	-26.0449
2012-11-04 15:29:39	22.89	25.21		6.95985	-23.3333	-25.6983
2012-11-04 15:39:39	23.11	25.43		6.96679	-23.5576	-25.9225	2012-11-04 15:39:39
2012-11-04 15:49:39	23.22	25.53		6.97374	-23.6697	-26.0245
2012-11-04 15:59:39	23.25	25.57		6.98068	-23.7003	-26.0652
2012-11-04 16:09:39	23.31	25.62		6.98763	-23.7615	-26.1162
2012-11-04 16:19:39	23.34	25.66		6.99457	-23.792	-26.157
2012-11-04 16:29:39	23.38	25.7		7.00152	-23.8328	-26.1978
2012-11-04 16:39:39	23.42	25.73		7.00846	-23.8736	-26.2283	2012-11-04 16:39:39
2012-11-04 16:49:39	23.46	25.78		7.01541	-23.9144	-26.2793
2012-11-04 16:59:39	23.51	25.81		7.02235	-23.9653	-26.3099
2012-11-04 17:09:39	23.55	25.87		7.02929	-24.0061	-26.371
2012-11-04 17:19:39	23.6	25.91		7.03624	-24.0571	-26.4118
2012-11-04 17:29:39	23.66	25.96		7.04318	-24.1182	-26.4628
2012-11-04 17:39:39	23.69	26.01		7.05013	-24.1488	-26.5138	2012-11-04 17:39:39
2012-11-04 17:49:39	23.75	26.07		7.05707	-24.21	-26.5749
2012-11-04 17:59:39	23.78	26.09		7.06402	-24.2406	-26.5953
2012-11-04 18:09:39	23.82	26.14		7.07096	-24.2813	-26.6463
2012-11-04 18:19:39	23.86	26.18		7.07791	-24.3221	-26.6871
2012-11-04 18:29:39	23.9	26.21		7.08485	-24.3629	-26.7176
2012-11-04 18:39:39	23.95	26.26		7.09179	-24.4139	-26.7686	2012-11-04 18:39:39
2012-11-04 18:49:39	24.01	26.32		7.09874	-24.475	-26.8298
2012-11-04 18:59:39	24.06	26.37		7.10568	-24.526	-26.8807
2012-11-04 19:09:39	24.1	26.41		7.11263	-24.5668	-26.9215
2012-11-04 19:19:39	24.16	26.47		7.11957	-24.6279	-26.9827
2012-11-04 19:29:39	24.22	26.52		7.12652	-24.6891	-27.0336
2012-11-04 19:39:39	24.25	26.54		7.13346	-24.7197	-27.054	2012-11-04 19:39:39
2012-11-04 19:49:39	24.33	26.58		7.14041	-24.8012	-27.0948
2012-11-04 19:59:39	24.36	26.64		7.14735	-24.8318	-27.156
2012-11-04 20:09:39	24.43	26.69		7.15429	-24.9032	-27.2069
2012-11-04 20:19:39	24.47	26.72		7.16124	-24.9439	-27.2375
2012-11-04 20:29:39	24.51	26.8		7.16818	-24.9847	-27.3191
2012-11-04 20:39:39	24.59	26.84		7.17513	-25.0663	-27.3598	2012-11-04 20:39:39
2012-11-04 20:49:39	24.62	26.92		7.18207	-25.0968	-27.4414
2012-11-04 20:59:39	24.68	26.98		7.18902	-25.158	-27.5025
2012-11-04 21:09:39	24.72	27		7.19596	-25.1988	-27.5229
2012-11-04 21:19:39	24.77	27.06		7.20291	-25.2497	-27.5841
2012-11-04 21:29:39	24.81	27.1		7.20985	-25.2905	-27.6249
2012-11-04 21:39:39	24.85	27.14		7.21679	-25.3313	-27.6656	2012-11-04 21:39:39
2012-11-04 21:49:39	24.89	27.18		7.22374	-25.3721	-27.7064
2012-11-04 21:59:39	24.93	27.23		7.23068	-25.4128	-27.7574
2012-11-04 22:09:39	24.98	27.28		7.23763	-25.4638	-27.8084
2012-11-04 22:19:39	25.02	27.32		7.24457	-25.5046	-27.8491
2012-11-04 22:29:39	25.06	27.36		7.25152	-25.5454	-27.8899
2012-11-04 22:39:39	25.1	27.4		7.25846	-25.5861	-27.9307	2012-11-04 22:39:39
2012-11-04 22:49:39	25.14	27.44		7.26541	-25.6269	-27.9715
2012-11-04 22:59:39	25.19	27.49		7.27235	-25.6779	-28.0224
2012-11-04 23:09:39	25.25	27.54		7.27929	-25.739	-28.0734
2012-11-04 23:19:39	25.29	27.59		7.28624	-25.7798	-28.1244
2012-11-04 23:29:39	25.32	27.63		7.29318	-25.8104	-28.1651
2012-11-04 23:39:39	25.36	27.67		7.30013	-25.8512	-28.2059	2012-11-04 23:39:39
2012-11-04 23:49:39	25.41	27.72		7.30707	-25.9021	-28.2569
2012-11-04 23:59:39	25.46	27.76		7.31402	-25.9531	-28.2977
2012-11-05 00:09:39	25.51	27.81		7.32096	-26.0041	-28.3486
2012-11-05 00:19:39	25.56	27.86		7.32791	-26.055	-28.3996
2012-11-05 00:29:39	25.61	27.9		7.33485	-26.106	-28.4404
2012-11-05 00:39:39	25.65	27.95		7.34179	-26.1468	-28.4913	2012-11-05 00:39:39
2012-11-05 00:49:39	25.71	28.01		7.34874	-26.208	-28.5525
2012-11-05 00:59:39	25.76	28.07		7.35568	-26.2589	-28.6137
2012-11-05 01:09:39	25.81	28.1		7.36263	-26.3099	-28.6442
2012-11-05 01:19:39	25.85	28.14		7.36957	-26.3507	-28.685
2012-11-05 01:29:39	25.9	28.2		7.37652	-26.4016	-28.7462
2012-11-05 01:39:39	25.96	28.26		7.38346	-26.4628	-28.8073	2012-11-05 01:39:39
2012-11-05 01:49:39	26	28.31		7.39041	-26.5036	-28.8583
2012-11-05 01:59:39	26.05	28.35		7.39735	-26.5545	-28.8991
2012-11-05 02:09:39	26.1	28.4		7.40429	-26.6055	-28.9501
2012-11-05 02:19:39	26.17	28.46		7.41124	-26.6769	-29.0112
2012-11-05 02:29:39	26.22	28.52		7.41818	-26.7278	-29.0724
2012-11-05 02:39:39	26.28	28.57		7.42513	-26.789	-29.1233	2012-11-05 02:39:39
2012-11-05 02:49:39	26.33	28.63		7.43207	-26.84	-29.1845
2012-11-05 02:59:39	26.39	28.68		7.43902	-26.9011	-29.2355
2012-11-05 03:09:39	26.43	28.73		7.44596	-26.9419	-29.2864
2012-11-05 03:19:39	26.5	28.79		7.45291	-27.0133	-29.3476
2012-11-05 03:29:39	26.53	28.84		7.45985	-27.0438	-29.3986
2012-11-05 03:39:39	26.59	28.88		7.46679	-27.105	-29.4393	2012-11-05 03:39:39
2012-11-05 03:49:39	26.65	28.94		7.47374	-27.1662	-29.5005
2012-11-05 03:59:39	26.69	28.99		7.48068	-27.2069	-29.5515
2012-11-05 04:09:39	26.76	29.05		7.48763	-27.2783	-29.6126
2012-11-05 04:19:39	26.81	29.11		7.49457	-27.3293	-29.6738
2012-11-05 04:29:39	26.87	29.16		7.50152	-27.3904	-29.7248
2012-11-05 04:39:39	26.9	29.2		7.50846	-27.421	-29.7655	2012-11-05 04:39:39
2012-11-05 04:49:39	26.95	29.24		7.51541	-27.472	-29.8063
2012-11-05 04:59:39	27	29.29		7.52235	-27.5229	-29.8573
2012-11-05 05:09:39	27.04	29.34		7.52929	-27.5637	-29.9083
2012-11-05 05:19:39	27.09	29.38		7.53624	-27.6147	-29.949
2012-11-05 05:29:39	27.14	29.44		7.54318	-27.6656	-30.0102
2012-11-05 05:39:39	27.19	29.49		7.55013	-27.7166	-30.0612	2012-11-05 05:39:39
2012-11-05 05:49:39	27.24	29.55		7.55707	-27.7676	-30.1223
2012-11-05 05:59:39	27.29	29.59		7.56402	-27.8186	-30.1631
2012-11-05 06:09:39	27.35	29.63		7.57096	-27.8797	-30.2039
2012-11-05 06:19:39	27.37	29.69		7.57791	-27.9001	-30.265
2012-11-05 06:29:39	27.43	29.74		7.58485	-27.9613	-30.316
2012-11-05 06:39:39	27.48	29.78		7.59179	-28.0122	-30.3568	2012-11-05 06:39:39
2012-11-05 06:49:39	27.53	29.83		7.59874	-28.0632	-30.4077
2012-11-05 06:59:39	27.57	29.88		7.60568	-28.104	-30.4587
2012-11-05 07:09:39	27.63	29.92		7.61263	-28.1651	-30.4995
2012-11-05 07:19:39	27.66	29.97		7.61957	-28.1957	-30.5505
2012-11-05 07:29:39	27.71	30.02		7.62652	-28.2467	-30.6014
2012-11-05 07:39:39	27.77	30.07		7.63346	-28.3078	-30.6524	2012-11-05 07:39:39
2012-11-05 07:49:39	27.82	30.12		7.64041	-28.3588	-30.7034
2012-11-05 07:59:39	27.88	30.17		7.64735	-28.42	-30.7543
2012-11-05 08:09:39	27.91	30.22		7.65429	-28.4506	-30.8053
2012-11-05 08:19:39	27.96	30.27		7.66124	-28.5015	-30.8563
2012-11-05 08:29:39	28	30.31		7.66818	-28.5423	-30.897
2012-11-05 08:39:39	28.06	30.36		7.67513	-28.6035	-30.948	2012-11-05 08:39:39
2012-11-05 08:49:39	28.09	30.4		7.68207	-28.634	-30.9888
2012-11-05 08:59:39	28.13	30.45		7.68902	-28.6748	-31.0398
2012-11-05 09:09:39	28.16	30.48		7.69596	-28.7054	-31.0703
2012-11-05 09:19:39	28.2	30.52		7.70291	-28.7462	-31.1111
2012-11-05 09:29:39	28.26	30.56		7.70985	-28.8073	-31.1519
2012-11-05 09:39:39	28.31	30.6		7.71679	-28.8583	-31.1927	2012-11-05 09:39:39
2012-11-05 09:49:39	28.34	30.66		7.72374	-28.8889	-31.2538
2012-11-05 09:59:39	28.38	30.71		7.73068	-28.9297	-31.3048
2012-11-05 10:09:39	28.43	30.74		7.73763	-28.9806	-31.3354
2012-11-05 10:19:39	28.49	30.79		7.74457	-29.0418	-31.3863
2012-11-05 10:29:39	28.52	30.83		7.75152	-29.0724	-31.4271
2012-11-05 10:39:39	28.57	30.87		7.75846	-29.1233	-31.4679	2012-11-05 10:39:39
2012-11-05 10:49:39	28.61	30.92		7.76541	-29.1641	-31.5189
2012-11-05 10:59:39	28.68	30.99		7.77235	-29.2355	-31.5902
2012-11-05 11:09:39	28.71	31.03		7.77929	-29.2661	-31.631
2012-11-05 11:19:39	28.71	30.99		7.78624	-29.2661	-31.5902
2012-11-05 11:29:39	28.78	31.08		7.79318	-29.3374	-31.682
2012-11-05 11:39:39	28.81	31.13		7.80013	-29.368	-31.7329	2012-11-05 11:39:39
2012-11-05 11:49:39	28.89	31.2		7.80707	-29.4495	-31.8043
2012-11-05 11:59:39	28.93	31.25		7.81402	-29.4903	-31.8552
2012-11-05 12:09:39	28.97	31.28		7.82096	-29.5311	-31.8858
2012-11-05 12:19:39	29.01	31.33		7.82791	-29.5719	-31.9368
2012-11-05 12:29:39	29.1	31.41		7.83485	-29.6636	-32.0183
2012-11-05 12:39:39	29.16	31.47		7.84179	-29.7248	-32.0795	2012-11-05 12:39:39
2012-11-05 12:49:39	29.22	31.52		7.84874	-29.7859	-32.1305
2012-11-05 12:59:39	29.26	31.57		7.85568	-29.8267	-32.1814
2012-11-05 13:09:39	29.35	31.65		7.86263	-29.9185	-32.263
2012-11-05 13:19:39	29.4	31.7		7.86957	-29.9694	-32.314
2012-11-05 13:29:39	29.44	31.74		7.87652	-30.0102	-32.3547
2012-11-05 13:39:39	29.5	31.79		7.88346	-30.0714	-32.4057	2012-11-05 13:39:39
2012-11-05 13:49:39	29.58	31.88		7.89041	-30.1529	-32.4975
2012-11-05 13:59:39	29.64	31.94		7.89735	-30.2141	-32.5586
2012-11-05 14:09:39	29.71	31.99		7.90429	-30.2854	-32.6096
2012-11-05 14:19:39	29.76	32.05		7.91124	-30.3364	-32.6707
2012-11-05 14:29:39	29.81	32.1		7.91818	-30.3874	-32.7217
2012-11-05 14:39:39	29.86	32.16		7.92513	-30.4383	-32.7829	2012-11-05 14:39:39
2012-11-05 14:49:39	29.93	32.24		7.93207	-30.5097	-32.8644
2012-11-05 14:59:39	29.99	32.29		7.93902	-30.5708	-32.9154
2012-11-05 15:09:39	30.04	32.33		7.94596	-30.6218	-32.9562
2012-11-05 15:19:39	30.1	32.39		7.95291	-30.683	-33.0173
2012-11-05 15:29:39	29.51	31.84		7.95985	-30.0815	-32.4567
2012-11-05 15:39:39	29.83	32.13		7.96679	-30.4077	-32.7523	2012-11-05 15:39:39
2012-11-05 15:49:39	30.1	32.36		7.97374	-30.683	-32.9867
2012-11-05 15:59:39	30.14	32.43		7.98068	-30.7238	-33.0581
2012-11-05 16:09:39	30.2	32.52		7.98763	-30.7849	-33.1498
2012-11-05 16:19:39	30.25	32.59		7.99457	-30.8359	-33.2212
2012-11-05 16:29:39	30.34	32.65		8.00152	-30.9276	-33.2824
2012-11-05 16:39:39	30.38	32.71		8.00846	-30.9684	-33.3435	2012-11-05 16:39:39
2012-11-05 16:49:39	30.47	32.77		8.01541	-31.0601	-33.4047
2012-11-05 16:59:39	30.56	32.86		8.02235	-31.1519	-33.4964
2012-11-05 17:09:39	30.63	32.94		8.02929	-31.2232	-33.578
2012-11-05 17:19:39	30.7	33.03		8.03624	-31.2946	-33.6697
2012-11-05 17:29:39	30.79	33.11		8.04318	-31.3863	-33.7513
2012-11-05 17:39:39	30.88	33.18		8.05013	-31.4781	-33.8226	2012-11-05 17:39:39
2012-11-05 17:49:39	30.92	33.25		8.05707	-31.5189	-33.894
2012-11-05 17:59:39	31	33.31		8.06402	-31.6004	-33.9551
2012-11-05 18:09:39	31.08	33.36		8.07096	-31.682	-34.0061
2012-11-05 18:19:39	31.12	33.45		8.07791	-31.7227	-34.0979
2012-11-05 18:29:39	31.18	33.52		8.08485	-31.7839	-34.1692
2012-11-05 18:39:39	31.26	33.58		8.09179	-31.8654	-34.2304	2012-11-05 18:39:39
2012-11-05 18:49:39	31.33	33.64		8.09874	-31.9368	-34.2915
2012-11-05 18:59:39	31.41	33.72		8.10568	-32.0183	-34.3731
2012-11-05 19:09:39	31.47	33.79		8.11263	-32.0795	-34.4444
2012-11-05 19:19:39	31.54	33.86		8.11957	-32.1509	-34.5158
2012-11-05 19:29:39	31.61	33.94		8.12652	-32.2222	-34.5973
2012-11-05 19:39:39	31.66	34.01		8.13346	-32.2732	-34.6687	2012-11-05 19:39:39
2012-11-05 19:49:39	31.75	34.08		8.14041	-32.3649	-34.7401
2012-11-05 19:59:39	31.83	34.15		8.14735	-32.4465	-34.8114
2012-11-05 20:09:39	31.89	34.21		8.15429	-32.5076	-34.8726
2012-11-05 20:19:39	31.98	34.25		8.16124	-32.5994	-34.9134
2012-11-05 20:29:39	32.03	34.34		8.16818	-32.6504	-35.0051
2012-11-05 20:39:39	32.09	34.39		8.17513	-32.7115	-35.0561	2012-11-05 20:39:39
2012-11-05 20:49:39	32.17	34.49		8.18207	-32.7931	-35.158
2012-11-05 20:59:39	32.23	34.55		8.18902	-32.8542	-35.2192
2012-11-05 21:09:39	32.32	34.59		8.19596	-32.946	-35.2599
2012-11-05 21:19:39	32.37	34.68		8.20291	-32.9969	-35.3517
2012-11-05 21:29:39	32.45	34.76		8.20985	-33.0785	-35.4332
2012-11-05 21:39:39	32.51	34.82		8.21679	-33.1397	-35.4944	2012-11-05 21:39:39
2012-11-05 21:49:39	32.57	34.89		8.22374	-33.2008	-35.5657
2012-11-05 21:59:39	32.64	34.95		8.23068	-33.2722	-35.6269
2012-11-05 22:09:39	32.73	35.01		8.23763	-33.3639	-35.6881
2012-11-05 22:19:39	32.78	35.08		8.24457	-33.4149	-35.7594
2012-11-05 22:29:39	32.85	35.14		8.25152	-33.4862	-35.8206
2012-11-05 22:39:39	32.9	35.18		8.25846	-33.5372	-35.8614	2012-11-05 22:39:39
2012-11-05 22:49:39	32.94	35.28		8.26541	-33.578	-35.9633
2012-11-05 22:59:39	33.02	35.32		8.27235	-33.6595	-36.0041
2012-11-05 23:09:39	33.12	35.4		8.27929	-33.7615	-36.0856
2012-11-05 23:19:39	33.17	35.49		8.28624	-33.8124	-36.1774
2012-11-05 23:29:39	33.25	35.54		8.29318	-33.894	-36.2283
2012-11-05 23:39:39	33.31	35.59		8.30013	-33.9551	-36.2793	2012-11-05 23:39:39
2012-11-05 23:49:39	33.38	35.67		8.30707	-34.0265	-36.3609
2012-11-05 23:59:39	33.44	35.75		8.31402	-34.0877	-36.4424
2012-11-06 00:09:39	33.51	35.81		8.32096	-34.159	-36.5036
2012-11-06 00:19:39	33.59	35.87		8.32791	-34.2406	-36.5647
2012-11-06 00:29:39	33.66	35.95		8.33485	-34.3119	-36.6463
2012-11-06 00:39:39	33.72	35.99		8.34179	-34.3731	-36.6871	2012-11-06 00:39:39
2012-11-06 00:49:39	33.81	36.08		8.34874	-34.4648	-36.7788
2012-11-06 00:59:39	33.86	36.17		8.35568	-34.5158	-36.8705
2012-11-06 01:09:39	33.94	36.21		8.36263	-34.5973	-36.9113
2012-11-06 01:19:39	34	36.3		8.36957	-34.6585	-37.0031
2012-11-06 01:29:39	34.07	36.37		8.37652	-34.7299	-37.0744
2012-11-06 01:39:39	34.13	36.45		8.38346	-34.791	-37.156	2012-11-06 01:39:39
2012-11-06 01:49:39	34.21	36.5		8.39041	-34.8726	-37.2069
2012-11-06 01:59:39	34.29	36.59		8.39735	-34.9541	-37.2987
2012-11-06 02:09:39	34.34	36.66		8.40429	-35.0051	-37.37
2012-11-06 02:19:39	34.43	36.73		8.41124	-35.0968	-37.4414
2012-11-06 02:29:39	34.5	36.8		8.41818	-35.1682	-37.5127
2012-11-06 02:39:39	34.56	36.87		8.42513	-35.2294	-37.5841	2012-11-06 02:39:39
2012-11-06 02:49:39	34.63	36.94		8.43207	-35.3007	-37.6555
2012-11-06 02:59:39	34.71	37.02		8.43902	-35.3823	-37.737
2012-11-06 03:09:39	34.78	37.1		8.44596	-35.4536	-37.8186
2012-11-06 03:19:39	34.87	37.17		8.45291	-35.5454	-37.8899
2012-11-06 03:29:39	34.93	37.22		8.45985	-35.6065	-37.9409
2012-11-06 03:39:39	35.01	37.32		8.46679	-35.6881	-38.0428	2012-11-06 03:39:39
2012-11-06 03:49:39	35.07	37.38		8.47374	-35.7492	-38.104
2012-11-06 03:59:39	35.14	37.45		8.48068	-35.8206	-38.1753
2012-11-06 04:09:39	35.21	37.52		8.48763	-35.8919	-38.2467
2012-11-06 04:19:39	35.3	37.6		8.49457	-35.9837	-38.3282
2012-11-06 04:29:39	35.36	37.66		8.50152	-36.0449	-38.3894
2012-11-06 04:39:39	35.43	37.74		8.50846	-36.1162	-38.4709	2012-11-06 04:39:39
2012-11-06 04:49:39	35.52	37.82		8.51541	-36.208	-38.5525
2012-11-06 04:59:39	35.59	37.9		8.52235	-36.2793	-38.634
2012-11-06 05:09:39	35.65	37.96		8.52929	-36.3405	-38.6952
2012-11-06 05:19:39	35.74	38.06		8.53624	-36.4322	-38.7971
2012-11-06 05:29:39	35.83	38.13		8.54318	-36.524	-38.8685
2012-11-06 05:39:39	35.83	38.21		8.55013	-36.524	-38.9501	2012-11-06 05:39:39
2012-11-06 05:49:39	35.97	38.28		8.55707	-36.6667	-39.0214
2012-11-06 05:59:39	36.03	38.34		8.56402	-36.7278	-39.0826
2012-11-06 06:09:39	36.12	38.43		8.57096	-36.8196	-39.1743
2012-11-06 06:19:39	36.18	38.51		8.57791	-36.8807	-39.2559
2012-11-06 06:29:39	36.28	38.59		8.58485	-36.9827	-39.3374
2012-11-06 06:39:39	36.35	38.66		8.59179	-37.054	-39.4088	2012-11-06 06:39:39
2012-11-06 06:49:39	36.43	38.74		8.59874	-37.1356	-39.4903
2012-11-06 06:59:39	36.51	38.83		8.60568	-37.2171	-39.5821
2012-11-06 07:09:39	36.6	38.92		8.61263	-37.3089	-39.6738
2012-11-06 07:19:39	36.67	39		8.61957	-37.3802	-39.7554
2012-11-06 07:29:39	36.75	39.03		8.62652	-37.4618	-39.7859
2012-11-06 07:39:39	36.83	39.14		8.63346	-37.5433	-39.8981	2012-11-06 07:39:39
2012-11-06 07:49:39	36.91	39.22		8.64041	-37.6249	-39.9796
2012-11-06 07:59:39	36.98	39.29		8.64735	-37.6962	-40.051
2012-11-06 08:09:39	37.05	39.37		8.65429	-37.7676	-40.1325
2012-11-06 08:19:39	37.14	39.45		8.66124	-37.8593	-40.2141
2012-11-06 08:29:39	37.22	39.54		8.66818	-37.9409	-40.3058
2012-11-06 08:39:39	37.29	39.6		8.67513	-38.0122	-40.367	2012-11-06 08:39:39
2012-11-06 08:49:39	37.38	39.69		8.68207	-38.104	-40.4587
2012-11-06 08:59:39	37.43	39.76		8.68902	-38.1549	-40.5301
2012-11-06 09:09:39	37.48	39.82		8.69596	-38.2059	-40.5912
2012-11-06 09:19:39	37.57	39.9		8.70291	-38.2977	-40.6728
2012-11-06 09:29:39	37.65	39.97		8.70985	-38.3792	-40.7441
2012-11-06 09:39:39	37.72	40.03		8.71679	-38.4506	-40.8053	2012-11-06 09:39:39
2012-11-06 09:49:39	37.82	40.12		8.72374	-38.5525	-40.897
2012-11-06 09:59:39	37.81	40.19		8.73068	-38.5423	-40.9684
2012-11-06 10:09:39	37.94	40.26		8.73763	-38.6748	-41.0398
2012-11-06 10:19:39	38.04	40.35		8.74457	-38.7768	-41.1315
2012-11-06 10:29:39	38.13	40.43		8.75152	-38.8685	-41.213
2012-11-06 10:39:39	38.2	40.52		8.75846	-38.9399	-41.3048	2012-11-06 10:39:39
2012-11-06 10:49:39	38.28	40.6		8.76541	-39.0214	-41.3863
2012-11-06 10:59:39	38.36	40.67		8.77235	-39.103	-41.4577
2012-11-06 11:09:39	38.45	40.77		8.77929	-39.1947	-41.5596
2012-11-06 11:19:39	38.52	40.84		8.78624	-39.2661	-41.631
2012-11-06 11:29:39	38.46	40.78		8.79318	-39.2049	-41.5698
2012-11-06 11:39:39	38.64	40.95		8.80013	-39.3884	-41.7431	2012-11-06 11:39:39
2012-11-06 11:49:39	38.72	41.04		8.80707	-39.4699	-41.8349
2012-11-06 11:59:39	38.8	41.12		8.81402	-39.5515	-41.9164
2012-11-06 12:09:39	38.89	41.2		8.82096	-39.6432	-41.998
2012-11-06 12:19:39	38.99	41.3		8.82791	-39.7452	-42.0999
2012-11-06 12:29:39	39.07	41.37		8.83485	-39.8267	-42.1713
2012-11-06 12:39:39	39.17	41.45		8.84179	-39.9286	-42.2528	2012-11-06 12:39:39
2012-11-06 12:49:39	39.25	41.54		8.84874	-40.0102	-42.3445
2012-11-06 12:59:39	39.33	41.64		8.85568	-40.0917	-42.4465
2012-11-06 13:09:39	39.41	41.72		8.86263	-40.1733	-42.528
2012-11-06 13:19:39	39.51	41.81		8.86957	-40.2752	-42.6198
2012-11-06 13:29:39	39.6	41.9		8.87652	-40.367	-42.7115
2012-11-06 13:39:39	39.69	42.01		8.88346	-40.4587	-42.8236	2012-11-06 13:39:39
2012-11-06 13:49:39	39.75	42.09		8.89041	-40.5199	-42.9052
2012-11-06 13:59:39	39.85	42.18		8.89735	-40.6218	-42.9969
2012-11-06 14:09:39	39.94	42.25		8.90429	-40.7136	-43.0683
2012-11-06 14:19:39	40.03	42.34		8.91124	-40.8053	-43.16
2012-11-06 14:29:39	40.14	42.44		8.91818	-40.9174	-43.262
2012-11-06 14:39:39	40.2	42.51		8.92513	-40.9786	-43.3333	2012-11-06 14:39:39
2012-11-06 14:49:39	40.26	42.63		8.93207	-41.0398	-43.4557
2012-11-06 14:59:39	40.37	42.69		8.93902	-41.1519	-43.5168
2012-11-06 15:09:39	40.46	42.77		8.94596	-41.2436	-43.5984
2012-11-06 15:19:39	40.55	42.86		8.95291	-41.3354	-43.6901
2012-11-06 15:29:39	40.63	42.97		8.95985	-41.4169	-43.8022
2012-11-06 15:39:39	40.73	43.04		8.96679	-41.5189	-43.8736	2012-11-06 15:39:39
2012-11-06 15:49:39	40.84	43.15		8.97374	-41.631	-43.9857
2012-11-06 15:59:39	40.92	43.24		8.98068	-41.7125	-44.0775
2012-11-06 16:09:39	41.01	43.32		8.98763	-41.8043	-44.159
2012-11-06 16:19:39	41.11	43.42		8.99457	-41.9062	-44.261
2012-11-06 16:29:39	41.19	43.52		9.00152	-41.9878	-44.3629
2012-11-06 16:39:39	41.3	43.59		9.00846	-42.0999	-44.4343	2012-11-06 16:39:39
2012-11-06 16:49:39	41.11	43.49		9.01541	-41.9062	-44.3323
2012-11-06 16:59:39	41.26	43.58		9.02235	-42.0591	-44.4241
2012-11-06 17:09:39	41.48	43.77		9.02929	-42.2834	-44.6177
2012-11-06 17:19:39	41.61	43.91		9.03624	-42.4159	-44.7604
2012-11-06 17:29:39	41.69	43.98		9.04318	-42.4975	-44.8318
2012-11-06 17:39:39	41.8	44.11		9.05013	-42.6096	-44.9643	2012-11-06 17:39:39
2012-11-06 17:49:39	41.9	44.21		9.05707	-42.7115	-45.0663
2012-11-06 17:59:39	42.02	44.33		9.06402	-42.8338	-45.1886
2012-11-06 18:09:39	42.12	44.43		9.07096	-42.9358	-45.2905
2012-11-06 18:19:39	42.24	44.53		9.07791	-43.0581	-45.3925
2012-11-06 18:29:39	42.34	44.63		9.08485	-43.16	-45.4944
2012-11-06 18:39:39	42.42	44.72		9.09179	-43.2416	-45.5861	2012-11-06 18:39:39
2012-11-06 18:49:39	42.56	44.85		9.09874	-43.3843	-45.7187
2012-11-06 18:59:39	42.65	44.94		9.10568	-43.476	-45.8104
2012-11-06 19:09:39	42.78	45.06		9.11263	-43.6086	-45.9327
2012-11-06 19:19:39	42.9	45.19		9.11957	-43.7309	-46.0652
2012-11-06 19:29:39	43.02	45.3		9.12652	-43.8532	-46.1774
2012-11-06 19:39:39	43.11	45.4		9.13346	-43.945	-46.2793	2012-11-06 19:39:39
2012-11-06 19:49:39	43.24	45.54		9.14041	-44.0775	-46.422
2012-11-06 19:59:39	43.36	45.66		9.14735	-44.1998	-46.5443
2012-11-06 20:09:39	43.44	45.72		9.15429	-44.2813	-46.6055
2012-11-06 20:19:39	43.56	45.86		9.16124	-44.4037	-46.7482
2012-11-06 20:29:39	43.71	46.01		9.16818	-44.5566	-46.9011
2012-11-06 20:39:39	43.78	46.07		9.17513	-44.6279	-46.9623	2012-11-06 20:39:39
2012-11-06 20:49:39	43.9	46.19		9.18207	-44.7503	-47.0846
2012-11-06 20:59:39	44.03	46.32		9.18902	-44.8828	-47.2171
2012-11-06 21:09:39	44.13	46.41		9.19596	-44.9847	-47.3089
2012-11-06 21:19:39	44.23	46.54		9.20291	-45.0866	-47.4414
2012-11-06 21:29:39	44.36	46.66		9.20985	-45.2192	-47.5637
2012-11-06 21:39:39	44.48	46.78		9.21679	-45.3415	-47.686	2012-11-06 21:39:39
2012-11-06 21:49:39	44.57	46.88		9.22374	-45.4332	-47.788
2012-11-06 21:59:39	44.7	47.01		9.23068	-45.5657	-47.9205
2012-11-06 22:09:39	44.8	47.11		9.23763	-45.6677	-48.0224
2012-11-06 22:19:39	44.94	47.25		9.24457	-45.8104	-48.1651
2012-11-06 22:29:39	45.04	47.35		9.25152	-45.9123	-48.2671
2012-11-06 22:39:39	45.14	47.46		9.25846	-46.0143	-48.3792	2012-11-06 22:39:39
2012-11-06 22:49:39	45.23	47.54		9.26541	-46.106	-48.4608
2012-11-06 22:59:39	45.35	47.66		9.27235	-46.2283	-48.5831
2012-11-06 23:09:39	45.48	47.79		9.27929	-46.3609	-48.7156
2012-11-06 23:19:39	45.58	47.89		9.28624	-46.4628	-48.8175
2012-11-06 23:29:39	45.7	48.01		9.29318	-46.5851	-48.9399
2012-11-06 23:39:39	45.82	48.14		9.30013	-46.7074	-49.0724	2012-11-06 23:39:39
2012-11-06 23:49:39	45.93	48.23		9.30707	-46.8196	-49.1641
2012-11-06 23:59:39	46.06	48.34		9.31402	-46.9521	-49.2762
2012-11-07 00:09:39	46.16	48.46		9.32096	-47.054	-49.3986
2012-11-07 00:19:39	46.24	48.58		9.32791	-47.1356	-49.5209
2012-11-07 00:29:39	46.38	48.66		9.33485	-47.2783	-49.6024
2012-11-07 00:39:39	46.47	48.79		9.34179	-47.37	-49.735	2012-11-07 00:39:39
2012-11-07 00:49:39	46.56	48.88		9.34874	-47.4618	-49.8267
2012-11-07 00:59:39	46.68	49		9.35568	-47.5841	-49.949
2012-11-07 01:09:39	46.8	49.12		9.36263	-47.7064	-50.0714
2012-11-07 01:19:39	46.88	49.21		9.36957	-47.788	-50.1631
2012-11-07 01:29:39	46.99	49.32		9.37652	-47.9001	-50.2752
2012-11-07 01:39:39	47.12	49.43		9.38346	-48.0326	-50.3874	2012-11-07 01:39:39
2012-11-07 01:49:39	47.21	49.54		9.39041	-48.1244	-50.4995
2012-11-07 01:59:39	47.38	49.63		9.39735	-48.2977	-50.5912
2012-11-07 02:09:39	47.46	49.78		9.40429	-48.3792	-50.7441
2012-11-07 02:19:39	47.56	49.88		9.41124	-48.4811	-50.8461
2012-11-07 02:29:39	47.67	50		9.41818	-48.5933	-50.9684
2012-11-07 02:39:39	47.78	50.09		9.42513	-48.7054	-51.0601	2012-11-07 02:39:39
2012-11-07 02:49:39	47.93	50.2		9.43207	-48.8583	-51.1723
2012-11-07 02:59:39	48	50.32		9.43902	-48.9297	-51.2946
2012-11-07 03:09:39	48.13	50.45		9.44596	-49.0622	-51.4271
2012-11-07 03:19:39	48.25	50.55		9.45291	-49.1845	-51.5291
2012-11-07 03:29:39	48.33	50.62		9.45985	-49.2661	-51.6004
2012-11-07 03:39:39	48.46	50.77		9.46679	-49.3986	-51.7533	2012-11-07 03:39:39
2012-11-07 03:49:39	48.57	50.83		9.47374	-49.5107	-51.8145
2012-11-07 03:59:39	48.66	50.98		9.48068	-49.6024	-51.9674
2012-11-07 04:09:39	48.8	51.07		9.48763	-49.7452	-52.0591
2012-11-07 04:19:39	48.88	51.17		9.49457	-49.8267	-52.1611
2012-11-07 04:29:39	49	51.32		9.50152	-49.949	-52.314
2012-11-07 04:39:39	49.14	51.41		9.50846	-50.0917	-52.4057	2012-11-07 04:39:39
2012-11-07 04:49:39	49.2	51.53		9.51541	-50.1529	-52.528
2012-11-07 04:59:39	49.36	51.65		9.52235	-50.316	-52.6504
2012-11-07 05:09:39	49.48	51.77		9.52929	-50.4383	-52.7727
2012-11-07 05:19:39	49.58	51.91		9.53624	-50.5403	-52.9154
2012-11-07 05:29:39	49.66	52		9.54318	-50.6218	-53.0071
2012-11-07 05:39:39	49.71	52.12		9.55013	-50.6728	-53.1295	2012-11-07 05:39:39
2012-11-07 05:49:39	49.9	52.18		9.55707	-50.8665	-53.1906
2012-11-07 05:59:39	50.02	52.31		9.56402	-50.9888	-53.3231
2012-11-07 06:09:39	50.13	52.41		9.57096	-51.1009	-53.4251
2012-11-07 06:19:39	50.25	52.52		9.57791	-51.2232	-53.5372
2012-11-07 06:29:39	50.34	52.67		9.58485	-51.315	-53.6901
2012-11-07 06:39:39	50.48	52.77		9.59179	-51.4577	-53.792	2012-11-07 06:39:39
2012-11-07 06:49:39	50.64	52.92		9.59874	-51.6208	-53.945
2012-11-07 06:59:39	50.72	53.02		9.60568	-51.7023	-54.0469
2012-11-07 07:09:39	50.82	53.14		9.61263	-51.8043	-54.1692
2012-11-07 07:19:39	50.92	53.24		9.61957	-51.9062	-54.2712
2012-11-07 07:29:39	51.03	53.36		9.62652	-52.0183	-54.3935
2012-11-07 07:39:39	51.13	53.47		9.63346	-52.1203	-54.5056	2012-11-07 07:39:39
2012-11-07 07:49:39	51.25	53.56		9.64041	-52.2426	-54.5973
2012-11-07 07:59:39	51.34	53.66		9.64735	-52.3344	-54.6993
2012-11-07 08:09:39	51.46	53.79		9.65429	-52.4567	-54.8318
2012-11-07 08:19:39	51.54	53.89		9.66124	-52.5382	-54.9337
2012-11-07 08:29:39	51.62	53.98		9.66818	-52.6198	-55.0255
2012-11-07 08:39:39	51.73	54.08		9.67513	-52.7319	-55.1274	2012-11-07 08:39:39
2012-11-07 08:49:39	51.84	54.21		9.68207	-52.844	-55.2599
2012-11-07 08:59:39	51.93	54.28		9.68902	-52.9358	-55.3313
2012-11-07 09:09:39	52.02	54.4		9.69596	-53.0275	-55.4536
2012-11-07 09:19:39	52.14	54.49		9.70291	-53.1498	-55.5454
2012-11-07 09:29:39	52.24	54.6		9.70985	-53.2518	-55.6575
2012-11-07 09:39:39	52.35	54.69		9.71679	-53.3639	-55.7492	2012-11-07 09:39:39
2012-11-07 09:49:39	52.47	54.81		9.72374	-53.4862	-55.8716
2012-11-07 09:59:39	52.56	54.93		9.73068	-53.578	-55.9939
2012-11-07 10:09:39	52.59	54.92		9.73763	-53.6086	-55.9837
2012-11-07 10:19:39	52.73	55.02		9.74457	-53.7513	-56.0856
2012-11-07 10:29:39	52.82	55.12		9.75152	-53.843	-56.1876
2012-11-07 10:39:39	52.95	55.29		9.75846	-53.9755	-56.3609	2012-11-07 10:39:39
2012-11-07 10:49:39	53.08	55.38		9.76541	-54.1081	-56.4526
2012-11-07 10:59:39	53.13	55.51		9.77235	-54.159	-56.5851
2012-11-07 11:09:39	53.26	55.61		9.77929	-54.2915	-56.6871
2012-11-07 11:19:39	53.36	55.7		9.78624	-54.3935	-56.7788
2012-11-07 11:29:39	53.46	55.78		9.79318	-54.4954	-56.8603
2012-11-07 11:39:39	53.57	55.88		9.80013	-54.6075	-56.9623	2012-11-07 11:39:39
2012-11-07 11:49:39	53.67	56.02		9.80707	-54.7095	-57.105
2012-11-07 11:59:39	53.78	56.13		9.81402	-54.8216	-57.2171
2012-11-07 12:09:39	53.89	56.23		9.82096	-54.9337	-57.3191
2012-11-07 12:19:39	54.02	56.31		9.82791	-55.0663	-57.4006
2012-11-07 12:29:39	54.12	56.46		9.83485	-55.1682	-57.5535
2012-11-07 12:39:39	54.21	56.57		9.84179	-55.2599	-57.6656	2012-11-07 12:39:39
2012-11-07 12:49:39	54.35	56.66		9.84874	-55.4027	-57.7574
2012-11-07 12:59:39	54.47	56.76		9.85568	-55.525	-57.8593
2012-11-07 13:09:39	54.57	56.92		9.86263	-55.6269	-58.0224
2012-11-07 13:19:39	54.69	57.01		9.86957	-55.7492	-58.1142
2012-11-07 13:29:39	54.81	57.15		9.87652	-55.8716	-58.2569
2012-11-07 13:39:39	54.94	57.25		9.88346	-56.0041	-58.3588	2012-11-07 13:39:39
2012-11-07 13:49:39	55.04	57.37		9.89041	-56.106	-58.4811
2012-11-07 13:59:39	55.18	57.51		9.89735	-56.2487	-58.6239
2012-11-07 14:09:39	55.3	57.63		9.90429	-56.371	-58.7462
2012-11-07 14:19:39	55.41	57.76		9.91124	-56.4832	-58.8787
2012-11-07 14:29:39	55.54	57.88		9.91818	-56.6157	-59.001
2012-11-07 14:39:39	55.66	58		9.92513	-56.738	-59.1233	2012-11-07 14:39:39
2012-11-07 14:49:39	55.8	58.12		9.93207	-56.8807	-59.2457
2012-11-07 14:59:39	55.91	58.26		9.93902	-56.9929	-59.3884
2012-11-07 15:09:39	56.04	58.39		9.94596	-57.1254	-59.5209
2012-11-07 15:19:39	56.15	58.49		9.95291	-57.2375	-59.6228
2012-11-07 15:29:39	56.3	58.64		9.95985	-57.3904	-59.7757
2012-11-07 15:39:39	56.44	58.78		9.96679	-57.5331	-59.9185	2012-11-07 15:39:39
2012-11-07 15:49:39	56.57	58.91		9.97374	-57.6656	-60.051
2012-11-07 15:59:39	56.72	59.05		9.98068	-57.8186	-60.1937
2012-11-07 16:09:39	56.82	59.18		9.98763	-57.9205	-60.3262
2012-11-07 16:19:39	57	59.33		9.99457	-58.104	-60.4791
2012-11-07 16:29:39	57.09	59.45		10.0015	-58.1957	-60.6014
2012-11-07 16:39:39	57.22	59.57		10.0085	-58.3282	-60.7238	2012-11-07 16:39:39
2012-11-07 16:49:39	57.3	59.72		10.0154	-58.4098	-60.8767
2012-11-07 16:59:39	57.22	59.57		10.0223	-58.3282	-60.7238
2012-11-07 17:09:39	57.46	59.8		10.0293	-58.5729	-60.9582
2012-11-07 17:19:39	57.67	59.99		10.0362	-58.787	-61.1519
2012-11-07 17:29:39	57.72	60.04		10.0432	-58.8379	-61.2029
2012-11-07 17:39:39	57.87	60.22		10.0501	-58.9908	-61.3863	2012-11-07 17:39:39
2012-11-07 17:49:39	58.01	60.34		10.0571	-59.1335	-61.5087
2012-11-07 17:59:39	58.17	60.51		10.064	-59.2966	-61.682
2012-11-07 18:09:39	58.32	60.67		10.071	-59.4495	-61.8451
2012-11-07 18:19:39	58.5	60.85		10.0779	-59.633	-62.0285
2012-11-07 18:29:39	58.63	60.96		10.0848	-59.7655	-62.1407
2012-11-07 18:39:39	58.78	61.1		10.0918	-59.9185	-62.2834	2012-11-07 18:39:39
2012-11-07 18:49:39	58.91	61.26		10.0987	-60.051	-62.4465
2012-11-07 18:59:39	59.05	61.4		10.1057	-60.1937	-62.5892
2012-11-07 19:09:39	59.23	61.56		10.1126	-60.3772	-62.7523
2012-11-07 19:19:39	59.42	61.74		10.1196	-60.5708	-62.9358
2012-11-07 19:29:39	59.58	61.9		10.1265	-60.7339	-63.0989
2012-11-07 19:39:39	59.74	62.09		10.1335	-60.897	-63.2926	2012-11-07 19:39:39
2012-11-07 19:49:39	59.93	62.25		10.1404	-61.0907	-63.4557
2012-11-07 19:59:39	60.08	62.4		10.1473	-61.2436	-63.6086
2012-11-07 20:09:39	60.21	62.57		10.1543	-61.3761	-63.7819
2012-11-07 20:19:39	60.4	62.72		10.1612	-61.5698	-63.9348
2012-11-07 20:29:39	60.57	62.87		10.1682	-61.7431	-64.0877
2012-11-07 20:39:39	60.76	63.04		10.1751	-61.9368	-64.261	2012-11-07 20:39:39
2012-11-07 20:49:39	60.94	63.24		10.1821	-62.1203	-64.4648
2012-11-07 20:59:39	61.1	63.44		10.189	-62.2834	-64.6687
2012-11-07 21:09:39	61.32	63.6		10.196	-62.5076	-64.8318
2012-11-07 21:19:39	61.46	63.79		10.2029	-62.6504	-65.0255
2012-11-07 21:29:39	61.65	63.96		10.2098	-62.844	-65.1988
2012-11-07 21:39:39	61.81	64.16		10.2168	-63.0071	-65.4027	2012-11-07 21:39:39
2012-11-07 21:49:39	61.96	64.26		10.2237	-63.16	-65.5046
2012-11-07 21:59:39	62.13	64.48		10.2307	-63.3333	-65.7288
2012-11-07 22:09:39	62.3	64.65		10.2376	-63.5066	-65.9021
2012-11-07 22:19:39	62.52	64.82		10.2446	-63.7309	-66.0754
2012-11-07 22:29:39	62.69	65		10.2515	-63.9042	-66.2589
2012-11-07 22:39:39	62.89	65.16		10.2585	-64.1081	-66.422	2012-11-07 22:39:39
2012-11-07 22:49:39	63.06	65.39		10.2654	-64.2813	-66.6565
2012-11-07 22:59:39	63.25	65.59		10.2723	-64.475	-66.8603
2012-11-07 23:09:39	63.44	65.73		10.2793	-64.6687	-67.0031
2012-11-07 23:19:39	63.62	65.97		10.2862	-64.8522	-67.2477
2012-11-07 23:29:39	63.82	66.11		10.2932	-65.0561	-67.3904
2012-11-07 23:39:39	63.99	66.3		10.3001	-65.2294	-67.5841	2012-11-07 23:39:39
2012-11-07 23:49:39	64.16	66.48		10.3071	-65.4027	-67.7676
2012-11-07 23:59:39	64.34	66.65		10.314	-65.5861	-67.9409
2012-11-08 00:09:39	64.5	66.85		10.321	-65.7492	-68.1448
2012-11-08 00:19:39	64.71	67.05		10.3279	-65.9633	-68.3486
2012-11-08 00:29:39	64.9	67.25		10.3348	-66.157	-68.5525
2012-11-08 00:39:39	65.07	67.43		10.3418	-66.3303	-68.736	2012-11-08 00:39:39
2012-11-08 00:49:39	65.27	67.61		10.3487	-66.5341	-68.9195
2012-11-08 00:59:39	65.45	67.82		10.3557	-66.7176	-69.1335
2012-11-08 01:09:39	65.66	68		10.3626	-66.9317	-69.317
2012-11-08 01:19:39	65.86	68.19		10.3696	-67.1356	-69.5107
2012-11-08 01:29:39	66.04	68.39		10.3765	-67.3191	-69.7146
2012-11-08 01:39:39	66.25	68.59		10.3835	-67.5331	-69.9185	2012-11-08 01:39:39
2012-11-08 01:49:39	66.33	68.79		10.3904	-67.6147	-70.1223
2012-11-08 01:59:39	66.63	69		10.3973	-67.9205	-70.3364
2012-11-08 02:09:39	66.84	69.21		10.4043	-68.1346	-70.5505
2012-11-08 02:19:39	67.03	69.4		10.4112	-68.3282	-70.7441
2012-11-08 02:29:39	67.23	69.59		10.4182	-68.5321	-70.9378
2012-11-08 02:39:39	67.44	69.82		10.4251	-68.7462	-71.1723	2012-11-08 02:39:39
2012-11-08 02:49:39	67.63	70.02		10.4321	-68.9399	-71.3761
2012-11-08 02:59:39	67.85	70.22		10.439	-69.1641	-71.58
2012-11-08 03:09:39	68.04	70.42		10.446	-69.3578	-71.7839
2012-11-08 03:19:39	68.25	70.61		10.4529	-69.5719	-71.9776
2012-11-08 03:29:39	68.47	70.85		10.4598	-69.7961	-72.2222
2012-11-08 03:39:39	68.67	71.06		10.4668	-70	-72.4363	2012-11-08 03:39:39
2012-11-08 03:49:39	68.89	71.27		10.4737	-70.2243	-72.6504
2012-11-08 03:59:39	69.12	71.48		10.4807	-70.4587	-72.8644
2012-11-08 04:09:39	69.31	71.69		10.4876	-70.6524	-73.0785
2012-11-08 04:19:39	69.52	71.91		10.4946	-70.8665	-73.3028
2012-11-08 04:29:39	69.75	72.13		10.5015	-71.1009	-73.527
2012-11-08 04:39:39	69.94	72.32		10.5085	-71.2946	-73.7207	2012-11-08 04:39:39
2012-11-08 04:49:39	70.18	72.55		10.5154	-71.5392	-73.9551
2012-11-08 04:59:39	70.41	72.79		10.5223	-71.7737	-74.1998
2012-11-08 05:09:39	70.6	73.02		10.5293	-71.9674	-74.4343
2012-11-08 05:19:39	70.85	73.25		10.5362	-72.2222	-74.6687
2012-11-08 05:29:39	71.06	73.45		10.5432	-72.4363	-74.8726
2012-11-08 05:39:39	71.29	73.69		10.5501	-72.6707	-75.1172	2012-11-08 05:39:39
2012-11-08 05:49:39	71.5	73.89		10.5571	-72.8848	-75.3211
2012-11-08 05:59:39	71.73	74.13		10.564	-73.1193	-75.5657
2012-11-08 06:09:39	71.95	74.36		10.571	-73.3435	-75.8002
2012-11-08 06:19:39	72.15	74.53		10.5779	-73.5474	-75.9735
2012-11-08 06:29:39	72.41	74.78		10.5848	-73.8124	-76.2283
2012-11-08 06:39:39	72.64	75.03		10.5918	-74.0469	-76.4832	2012-11-08 06:39:39
2012-11-08 06:49:39	72.87	75.27		10.5987	-74.2813	-76.7278
2012-11-08 06:59:39	73.1	75.51		10.6057	-74.5158	-76.9725
2012-11-08 07:09:39	73.35	75.75		10.6126	-74.7706	-77.2171
2012-11-08 07:19:39	73.54	75.95		10.6196	-74.9643	-77.421
2012-11-08 07:29:39	73.77	76.18		10.6265	-75.1988	-77.6555
2012-11-08 07:39:39	74	76.4		10.6335	-75.4332	-77.8797	2012-11-08 07:39:39
2012-11-08 07:49:39	74.18	76.61		10.6404	-75.6167	-78.0938
2012-11-08 07:59:39	74.43	76.86		10.6473	-75.8716	-78.3486
2012-11-08 08:09:39	74.69	77.06		10.6543	-76.1366	-78.5525
2012-11-08 08:19:39	74.86	77.27		10.6612	-76.3099	-78.7666
2012-11-08 08:29:39	75.08	77.51		10.6682	-76.5341	-79.0112
2012-11-08 08:39:39	75.3	77.72		10.6751	-76.7584	-79.2253	2012-11-08 08:39:39
2012-11-08 08:49:39	75.56	77.98		10.6821	-77.0234	-79.4903
2012-11-08 08:59:39	75.78	78.2		10.689	-77.2477	-79.7146
2012-11-08 09:09:39	76.02	78.49		10.696	-77.4924	-80.0102
2012-11-08 09:19:39	76.29	78.7		10.7029	-77.7676	-80.2243
2012-11-08 09:29:39	76.51	78.94		10.7098	-77.9918	-80.4689
2012-11-08 09:39:39	76.77	79.2		10.7168	-78.2569	-80.7339	2012-11-08 09:39:39
2012-11-08 09:49:39	77.01	79.44		10.7237	-78.5015	-80.9786
2012-11-08 09:59:39	77.24	79.67		10.7307	-78.736	-81.213
2012-11-08 10:09:39	77.47	79.92		10.7376	-78.9704	-81.4679
2012-11-08 10:19:39	77.72	80.07		10.7446	-79.2253	-81.6208
2012-11-08 10:29:39	77.93	80.34		10.7515	-79.4393	-81.896
2012-11-08 10:39:39	78.19	80.59		10.7585	-79.7044	-82.1509	2012-11-08 10:39:39
2012-11-08 10:49:39	78.37	80.82		10.7654	-79.8879	-82.3853
2012-11-08 10:59:39	78.65	81.12		10.7723	-80.1733	-82.6911
2012-11-08 11:09:39	78.93	81.34		10.7793	-80.4587	-82.9154
2012-11-08 11:19:39	79.19	81.61		10.7862	-80.7238	-83.1906
2012-11-08 11:29:39	79.44	81.87		10.7932	-80.9786	-83.4557
2012-11-08 11:39:39	79.67	82.08		10.8001	-81.213	-83.6697	2012-11-08 11:39:39
2012-11-08 11:49:39	79.91	82.32		10.8071	-81.4577	-83.9144
2012-11-08 11:59:39	80.19	82.59		10.814	-81.7431	-84.1896
2012-11-08 12:09:39	80.43	82.86		10.821	-81.9878	-84.4648
2012-11-08 12:19:39	80.69	83.1		10.8279	-82.2528	-84.7095
2012-11-08 12:29:39	80.92	83.36		10.8348	-82.4873	-84.9745
2012-11-08 12:39:39	81.19	83.63		10.8418	-82.7625	-85.2497	2012-11-08 12:39:39
2012-11-08 12:49:39	81.45	83.89		10.8487	-83.0275	-85.5148
2012-11-08 12:59:39	81.71	84.14		10.8557	-83.2926	-85.7696
2012-11-08 13:09:39	81.99	84.44		10.8626	-83.578	-86.0754
2012-11-08 13:19:39	82.25	84.71		10.8696	-83.843	-86.3507
2012-11-08 13:29:39	82.48	84.93		10.8765	-84.0775	-86.5749
2012-11-08 13:39:39	82.74	85.18		10.8835	-84.3425	-86.8298	2012-11-08 13:39:39
2012-11-08 13:49:39	83.01	85.45		10.8904	-84.6177	-87.105
2012-11-08 13:59:39	83.26	85.67		10.8973	-84.8726	-87.3293
2012-11-08 14:09:39	83.48	85.93		10.9043	-85.0968	-87.5943
2012-11-08 14:19:39	83.77	86.27		10.9112	-85.3925	-87.9409
2012-11-08 14:29:39	83.7	86.07		10.9182	-85.3211	-87.737
2012-11-08 14:39:39	84.1	86.56		10.9251	-85.7288	-88.2365	2012-11-08 14:39:39
2012-11-08 14:49:39	84.44	86.89		10.9321	-86.0754	-88.5729
2012-11-08 14:59:39	84.73	87.15		10.939	-86.371	-88.8379
2012-11-08 15:09:39	84.99	87.42		10.946	-86.6361	-89.1131
2012-11-08 15:19:39	85.27	87.69		10.9529	-86.9215	-89.3884
2012-11-08 15:29:39	85.56	87.99		10.9598	-87.2171	-89.6942
2012-11-08 15:39:39	85.77	88.3		10.9668	-87.4312	-90.0102	2012-11-08 15:39:39
2012-11-08 15:49:39	86.12	88.58		10.9737	-87.788	-90.2956
2012-11-08 15:59:39	86.42	88.88		10.9807	-88.0938	-90.6014
2012-11-08 16:09:39	86.72	89.16		10.9876	-88.3996	-90.8869
2012-11-08 16:19:39	87.01	89.45		10.9946	-88.6952	-91.1825
2012-11-08 16:29:39	87.33	89.78		11.0015	-89.0214	-91.5189
2012-11-08 16:39:39	87.59	90.04		11.0085	-89.2864	-91.7839	2012-11-08 16:39:39
2012-11-08 16:49:39	87.87	90.37		11.0154	-89.5719	-92.1203
2012-11-08 16:59:39	88.19	90.67		11.0223	-89.8981	-92.4261
2012-11-08 17:09:39	88.47	90.95		11.0293	-90.1835	-92.7115
2012-11-08 17:19:39	88.76	91.26		11.0362	-90.4791	-93.0275
2012-11-08 17:29:39	89.06	91.53		11.0432	-90.7849	-93.3028
2012-11-08 17:39:39	89.36	91.84		11.0501	-91.0907	-93.6188	2012-11-08 17:39:39
2012-11-08 17:49:39	89.6	92.12		11.0571	-91.3354	-93.9042
2012-11-08 17:59:39	89.9	92.39		11.064	-91.6412	-94.1794
2012-11-08 18:09:39	90.12	92.66		11.071	-91.8654	-94.4546
2012-11-08 18:19:39	90.46	92.97		11.0779	-92.212	-94.7706
2012-11-08 18:29:39	90.69	93.19		11.0848	-92.4465	-94.9949
2012-11-08 18:39:39	90.96	93.42		11.0918	-92.7217	-95.2294	2012-11-08 18:39:39
2012-11-08 18:49:39	91.24	93.73		11.0987	-93.0071	-95.5454
2012-11-08 18:59:39	91.51	94.06		11.1057	-93.2824	-95.8818
2012-11-08 19:09:39	91.83	94.38		11.1126	-93.6086	-96.208
2012-11-08 19:19:39	92.15	94.68		11.1196	-93.9348	-96.5138
2012-11-08 19:29:39	92.46	94.99		11.1265	-94.2508	-96.8298
2012-11-08 19:39:39	92.8	95.33		11.1335	-94.5973	-97.1764	2012-11-08 19:39:39
2012-11-08 19:49:39	93.06	95.62		11.1404	-94.8624	-97.472
2012-11-08 19:59:39	93.47	95.94		11.1473	-95.2803	-97.7982
2012-11-08 20:09:39	93.77	96.12		11.1543	-95.5861	-97.9817
2012-11-08 20:19:39	94.11	96.61		11.1612	-95.9327	-98.4811
2012-11-08 20:29:39	94.45	96.93		11.1682	-96.2793	-98.8073
2012-11-08 20:39:39	93.87	97.27		11.1751	-95.6881	-99.1539	2012-11-08 20:39:39
2012-11-08 20:49:39	95.1	97.64		11.1821	-96.9419	-99.5311
2012-11-08 20:59:39	95.42	97.97		11.189	-97.2681	-99.8675
2012-11-08 21:09:39	95.81	98.29		11.196	-97.6656	-100.194
2012-11-08 21:19:39	96.12	98.66		11.2029	-97.9817	-100.571
2012-11-08 21:29:39	96.44	99.01		11.2098	-98.3078	-100.928
2012-11-08 21:39:39	96.8	99.34		11.2168	-98.6748	-101.264	2012-11-08 21:39:39
2012-11-08 21:49:39	97.17	99.74		11.2237	-99.052	-101.672
2012-11-08 21:59:39	97.53	100.07		11.2307	-99.419	-102.008
2012-11-08 22:09:39	97.88	100.48		11.2376	-99.7757	-102.426
2012-11-08 22:19:39	98.23	100.83		11.2446	-100.133	-102.783
2012-11-08 22:29:39	98.61	101.2		11.2515	-100.52	-103.16
2012-11-08 22:39:39	98.93	101.54		11.2585	-100.846	-103.507	2012-11-08 22:39:39
2012-11-08 22:49:39	99.31	101.91		11.2654	-101.233	-103.884
2012-11-08 22:59:39	99.68	102.27		11.2723	-101.611	-104.251
2012-11-08 23:09:39	100.03	102.63		11.2793	-101.967	-104.618
2012-11-08 23:19:39	100.34	102.85		11.2862	-102.283	-104.842
2012-11-08 23:29:39	100.65	103.24		11.2932	-102.599	-105.24
2012-11-08 23:39:39	101.01	103.6		11.3001	-102.966	-105.607	2012-11-08 23:39:39
2012-11-08 23:49:39	101.36	103.99		11.3071	-103.323	-106.004
2012-11-08 23:59:39	101.69	104.29		11.314	-103.66	-106.31
2012-11-09 00:09:39	102.07	104.72		11.321	-104.047	-106.748
2012-11-09 00:19:39	102.4	105.02		11.3279	-104.383	-107.054
2012-11-09 00:29:39	102.76	105.4		11.3348	-104.75	-107.441
2012-11-09 00:39:39	103.12	105.8		11.3418	-105.117	-107.849	2012-11-09 00:39:39
2012-11-09 00:49:39	103.49	106.17		11.3487	-105.494	-108.226
2012-11-09 00:59:39	103.85	106.52		11.3557	-105.861	-108.583
2012-11-09 01:09:39	104.22	106.88		11.3626	-106.239	-108.95
2012-11-09 01:19:39	104.6	107.22		11.3696	-106.626	-109.297
2012-11-09 01:29:39	104.98	107.63		11.3765	-107.013	-109.715
2012-11-09 01:39:39	105.32	107.98		11.3835	-107.36	-110.071	2012-11-09 01:39:39
2012-11-09 01:49:39	105.68	108.36		11.3904	-107.727	-110.459
2012-11-09 01:59:39	106.04	108.69		11.3973	-108.094	-110.795
2012-11-09 02:09:39	106.41	109.12		11.4043	-108.471	-111.233
2012-11-09 02:19:39	106.82	109.49		11.4112	-108.889	-111.611
2012-11-09 02:29:39	107.17	109.81		11.4182	-109.246	-111.937
2012-11-09 02:39:39	107.52	110.22		11.4251	-109.602	-112.355	2012-11-09 02:39:39
2012-11-09 02:49:39	107.87	110.58		11.4321	-109.959	-112.722
2012-11-09 02:59:39	108.23	110.96		11.439	-110.326	-113.109
2012-11-09 03:09:39	108.6	111.28		11.446	-110.703	-113.435
2012-11-09 03:19:39	108.95	111.69		11.4529	-111.06	-113.853
2012-11-09 03:29:39	109.34	112.11		11.4598	-111.458	-114.281
2012-11-09 03:39:39	109.73	112.46		11.4668	-111.855	-114.638	2012-11-09 03:39:39
2012-11-09 03:49:39	110.12	112.82		11.4737	-112.253	-115.005
2012-11-09 03:59:39	110.47	113.18		11.4807	-112.61	-115.372
2012-11-09 04:09:39	110.87	113.6		11.4876	-113.017	-115.8
2012-11-09 04:19:39	111.24	113.98		11.4946	-113.394	-116.188
2012-11-09 04:29:39	111.67	114.37		11.5015	-113.833	-116.585
2012-11-09 04:39:39	112.01	114.72		11.5085	-114.179	-116.942	2012-11-09 04:39:39
2012-11-09 04:49:39	112.41	115.17		11.5154	-114.587	-117.401
2012-11-09 04:59:39	112.79	115.5		11.5223	-114.975	-117.737
2012-11-09 05:09:39	113.18	115.89		11.5293	-115.372	-118.135
2012-11-09 05:19:39	113.46	116.3		11.5362	-115.657	-118.552
2012-11-09 05:29:39	113.92	116.63		11.5432	-116.126	-118.889
2012-11-09 05:39:39	114.28	117.05		11.5501	-116.493	-119.317	2012-11-09 05:39:39
2012-11-09 05:49:39	114.69	117.41		11.5571	-116.911	-119.684
[truncated: 1,366 more rows]

## Sheet: Tensi
Zeit [d]	MP bot(2) [cm]	MP top(1) [cm]		air entry bot		AE time	AE [cm]	Type	Pos	Weight
0.0015162	-0.662589	-3.28236		NAN	8800	#VALUE!	-8970.44	1	2	1
0.0431829	-1.1213	-3.67992
0.0848495	-1.6208	-4.1896		air entry top
0.126516	-2.12029	-4.70948		Time					Pos	Weight
0.168183	-2.61978	-5.19878		2012-11-16 03:19:39	8800	18.4529	-8970.44	1	1	1
0.20985	-3.0581	-5.6371
0.251516	-3.51682	-6.08563
0.293183	-3.77166	-6.33028
0.33485	-4.10805	-6.66667
0.376516	-4.41386	-6.97248
0.418183	-4.32212	-6.88073
0.45985	-4.59735	-7.14577
0.501516	-4.79103	-7.33945
0.543183	-4.88277	-7.38022
0.58485	-5.12742	-7.62487
0.626516	-5.3211	-7.84913
0.668183	-5.44343	-7.98165
0.70985	-5.02548	-7.55352
0.751516	-5.27013	-7.77778
0.793183	-5.35168	-7.87971
0.83485	-5.52497	-8.03262
0.876516	-5.61672	-8.13456
0.918183	-5.59633	-8.11417
0.95985	-5.70846	-8.23649
1.00152	-5.8104	-8.31804
1.04318	-5.92253	-8.44037
1.09179	-5.8104	-8.31804
1.13346	-6.03466	-8.51172
1.17513	-6.11621	-8.61366
1.21679	-6.23853	-8.72579
1.25846	-6.29969	-8.80734
1.30013	-6.40163	-8.89908
1.34179	-6.47299	-8.98063
1.38346	-6.57492	-9.06218
1.42513	-6.59531	-9.08257
1.46679	-6.49337	-8.99083
1.50846	-6.69725	-9.18451
1.55013	-6.80938	-9.29664
1.59179	-6.80938	-9.30683
1.63346	-6.81957	-9.26606
1.67513	-6.54434	-9.04179
1.71679	-6.7686	-9.25586
1.75846	-6.81957	-9.30683
1.80013	-6.87054	-9.3578
1.84179	-6.90112	-9.38838
1.88346	-6.95209	-9.43935
1.92513	-6.95209	-9.44954
1.96679	-6.98267	-9.48012
2.00846	-7.03364	-9.53109
2.05013	-7.07441	-9.56167
2.09179	-7.12538	-9.61264
2.13346	-7.18654	-9.6738
2.17513	-7.01325	-9.49032
2.21679	-7.29867	-9.77574
2.25846	-7.39042	-9.86748
2.30013	-7.47197	-9.94903
2.34179	-7.53313	-10
2.38346	-7.62487	-10.0815
2.42513	-7.70642	-10.1427
2.46679	-7.75739	-10.2243
2.50846	-7.84913	-10.3058
2.55013	-7.9001	-10.3568
2.59179	-7.95107	-10.4179
2.63346	-8.02243	-10.4893
2.67513	-8.13456	-10.5607
2.71679	-7.84913	-10.3058
2.75846	-8.07339	-10.5301
2.80013	-7.01325	-9.5209
2.84179	-7.37003	-9.82671
2.88346	-7.66565	-10.1223
2.92513	-7.87971	-10.3262
2.96679	-8.03262	-10.4791
3.00846	-8.14475	-10.5912
3.05013	-8.18552	-10.632
3.09179	-8.36901	-10.8155
3.13346	-8.51172	-10.9582
3.17513	-8.64424	-11.0703
3.21679	-8.79715	-11.1927
3.25846	-8.88889	-11.3252
3.30013	-9.00102	-11.4271
3.34179	-9.08257	-11.5189
3.38346	-9.17431	-11.6106
3.42513	-9.29664	-11.7329
3.46679	-9.38838	-11.8145
3.50846	-9.49032	-11.8654
3.55013	-9.55148	-11.9878
3.59179	-9.6738	-12.0999
3.63346	-9.77574	-12.2018
3.67513	-9.71458	-12.1101
3.71679	-9.26606	-11.6922
3.75846	-9.61264	-12.0387
3.80013	-9.82671	-12.2528
3.84179	-9.89806	-12.3547
3.88346	-10.0714	-12.4873
3.92513	-10.2446	-12.6606
3.96679	-10.3874	-12.8135
4.00846	-10.5097	-12.946
4.05013	-10.4179	-12.8746
4.09179	-10.6524	-13.0887
4.13346	-10.8155	-13.2416
4.17513	-11.0296	-13.4353
4.21679	-11.2538	-13.629
4.25846	-11.4169	-13.8328
4.30013	-11.6208	-14.0265
4.34179	-11.8043	-14.21
4.38346	-11.998	-14.4037
4.42513	-12.1814	-14.5872
4.46679	-12.3344	-14.7401
4.50846	-12.4669	-14.8726
4.55013	-12.528	-15.0255
4.59179	-12.8033	-15.209
4.63346	-12.9664	-15.3721
4.67513	-13.0785	-15.5046
4.71679	-13.2008	-15.6167
4.75846	-13.3333	-15.6983
4.80013	-13.4353	-15.8512
4.84179	-13.5882	-16.0041
4.88346	-13.7003	-16.1264
4.92513	-13.8634	-16.2793
4.96679	-13.8838	-16.2997
5.00846	-14.0775	-16.4424
5.05013	-14.2712	-16.6361
5.09179	-14.4546	-16.8094
5.13346	-14.6687	-17.0234
5.17513	-14.8318	-17.1865
5.21679	-15.0561	-17.421
5.25846	-15.2599	-17.6249
5.30013	-15.474	-17.8287
5.34179	-15.6779	-18.0326
5.38346	-15.8919	-18.2671
5.42513	-16.0856	-18.4506
5.46679	-16.2895	-18.6544
5.50846	-16.4934	-18.8583
5.55013	-16.6667	-19.0316
5.59179	-16.8502	-19.2253
5.63346	-17.0438	-19.4088
5.67513	-17.2477	-19.6024
5.71679	-17.4618	-19.7859
5.75846	-17.6045	-19.9592
5.80013	-17.8186	-20.1427
5.84179	-17.9817	-20.3364
5.88346	-18.1651	-20.5199
5.92513	-18.3486	-20.7034
5.96679	-18.3996	-20.7645
6.00846	-18.6035	-20.9888
6.05013	-18.8073	-21.1927
6.09179	-19.001	-21.3558
6.13346	-19.2049	-21.5596
6.17513	-19.419	-21.7635
6.21679	-19.6636	-21.998
6.25846	-19.9286	-22.2528
6.30013	-20.1733	-22.5178
6.34179	-20.4485	-22.7727
6.38346	-20.683	-23.0173
6.42513	-20.9174	-23.262
6.46679	-21.1723	-23.5168
6.50846	-21.4271	-23.7717
6.55013	-21.6718	-24.0265
6.59179	-21.9266	-24.261
6.63346	-22.1407	-24.4954
6.67513	-22.3547	-24.7197
6.71679	-22.5484	-24.893
6.75846	-22.7421	-25.0866
6.80013	-22.9256	-25.2803
6.84179	-23.1193	-25.474
6.88346	-23.3231	-25.6677
6.92513	-23.5474	-25.8919
6.96679	-23.5576	-25.9225
7.00846	-23.8736	-26.2283
7.05013	-24.1488	-26.5138
7.09179	-24.4139	-26.7686
7.13346	-24.7197	-27.054
7.17513	-25.0663	-27.3598
7.21679	-25.3313	-27.6656
7.25846	-25.5861	-27.9307
7.30013	-25.8512	-28.2059
7.34179	-26.1468	-28.4913
7.38346	-26.4628	-28.8073
7.42513	-26.789	-29.1233
7.46679	-27.105	-29.4393
7.50846	-27.421	-29.7655
7.55013	-27.7166	-30.0612
7.59179	-28.0122	-30.3568
7.63346	-28.3078	-30.6524
7.67513	-28.6035	-30.948
7.71679	-28.8583	-31.1927
7.75846	-29.1233	-31.4679
7.80013	-29.368	-31.7329
7.84179	-29.7248	-32.0795
7.88346	-30.0714	-32.4057
7.92513	-30.4383	-32.7829
7.96679	-30.4077	-32.7523
8.00846	-30.9684	-33.3435
8.05013	-31.4781	-33.8226
8.09179	-31.8654	-34.2304
8.13346	-32.2732	-34.6687
8.17513	-32.7115	-35.0561
8.21679	-33.1397	-35.4944
8.25846	-33.5372	-35.8614
8.30013	-33.9551	-36.2793
8.34179	-34.3731	-36.6871
8.38346	-34.791	-37.156
8.42513	-35.2294	-37.5841
8.46679	-35.6881	-38.0428
8.50846	-36.1162	-38.4709
8.55013	-36.524	-38.9501
8.59179	-37.054	-39.4088
8.63346	-37.5433	-39.8981
8.67513	-38.0122	-40.367
8.71679	-38.4506	-40.8053
8.75846	-38.9399	-41.3048
8.80013	-39.3884	-41.7431
8.84179	-39.9286	-42.2528
8.88346	-40.4587	-42.8236
8.92513	-40.9786	-43.3333
8.96679	-41.5189	-43.8736
9.00846	-42.0999	-44.4343
9.05013	-42.6096	-44.9643
9.09179	-43.2416	-45.5861
9.13346	-43.945	-46.2793
9.17513	-44.6279	-46.9623
9.21679	-45.3415	-47.686
9.25846	-46.0143	-48.3792
9.30013	-46.7074	-49.0724
9.34179	-47.37	-49.735
9.38346	-48.0326	-50.3874
9.42513	-48.7054	-51.0601
9.46679	-49.3986	-51.7533
9.50846	-50.0917	-52.4057
9.55013	-50.6728	-53.1295
9.59179	-51.4577	-53.792
9.63346	-52.1203	-54.5056
9.67513	-52.7319	-55.1274
9.71679	-53.3639	-55.7492
9.75846	-53.9755	-56.3609
9.80013	-54.6075	-56.9623
9.84179	-55.2599	-57.6656
9.88346	-56.0041	-58.3588
9.92513	-56.738	-59.1233
9.96679	-57.5331	-59.9185
10.0085	-58.3282	-60.7238
10.0501	-58.9908	-61.3863
10.0918	-59.9185	-62.2834
10.1335	-60.897	-63.2926
10.1751	-61.9368	-64.261
10.2168	-63.0071	-65.4027
10.2585	-64.1081	-66.422
10.3001	-65.2294	-67.5841
10.3418	-66.3303	-68.736
10.3835	-67.5331	-69.9185
10.4251	-68.7462	-71.1723
10.4668	-70	-72.4363
10.5085	-71.2946	-73.7207
10.5501	-72.6707	-75.1172
10.5918	-74.0469	-76.4832
10.6335	-75.4332	-77.8797
10.6751	-76.7584	-79.2253
10.7168	-78.2569	-80.7339
10.7585	-79.7044	-82.1509
10.8001	-81.213	-83.6697
10.8418	-82.7625	-85.2497
10.8835	-84.3425	-86.8298
10.9251	-85.7288	-88.2365
10.9668	-87.4312	-90.0102
11.0085	-89.2864	-91.7839
11.0501	-91.0907	-93.6188
11.0918	-92.7217	-95.2294
11.1335	-94.5973	-97.1764
11.1751	-95.6881	-99.1539
11.2168	-98.6748	-101.264
11.2585	-100.846	-103.507
11.3001	-102.966	-105.607
11.3418	-105.117	-107.849
11.3835	-107.36	-110.071
11.4251	-109.602	-112.355
11.4668	-111.855	-114.638
11.5085	-114.179	-116.942
11.5501	-116.493	-119.317
11.5918	-118.818	-121.641
11.6335	-121.04	-123.894
11.6751	-121.876	-123.394
11.7168	-124.444	-127.258
11.7585	-126.31	-129.144
11.8001	-128.267	-131.101
11.8418	-130.163	-133.058
11.8835	-132.192	-135.076
11.9251	-134.047	-137.003
11.9668	-136.361	-139.348
12.0085	-138.787	-141.794
12.0501	-141.009	-143.955
12.0918	-143.109	-146.167
12.1335	-145.209	-148.155
12.1751	-147.299	-150.408
12.2168	-149.246	-152.385
12.2585	-151.182	-154.383
12.3001	-153.017	-156.249
12.3418	-154.811	-158.084
12.3835	-156.442	-159.786
12.4251	-158.022	-161.335
12.4668	-159.511	-162.864
12.5085	-160.846	-164.271
12.5501	-162.171	-165.617
12.5918	-163.394	-166.891
12.6335	-164.557	-168.114
12.6751	-165.657	-169.246
12.7168	-166.697	-170.347
12.7585	-167.564	-171.203
12.8001	-168.298	-172.018
12.8418	-169.123	-172.864
12.8835	-169.898	-173.741
12.9251	-170.693	-174.424
12.9668	-171.182	-174.964
13.0085	-171.978	-175.851
13.0501	-172.732	-176.748
13.0918	-173.537	-177.543
13.1335	-174.21	-178.369
13.1751	-174.842	-179.103
13.2168	-175.525	-179.847
13.2585	-176.208	-180.622
13.3001	-176.799	-181.315
13.3418	-177.299	-181.855
13.3835	-177.788	-182.477
13.4251	-178.165	-183.058
13.4668	-178.685	-183.71
13.5085	-179.123	-184.312
13.5501	-179.551	-184.964
13.5918	-179.908	-185.535
13.6335	-180.408	-186.188
13.6751	-180.815	-186.82
13.7168	-181.223	-187.411
13.7585	-181.58	-188.135
13.8001	-181.967	-188.848
13.8418	-182.334	-189.572
13.8835	-182.661	-190.367
13.9251	-183.354	-191.223
13.9668	-182.834	-191.437
14.0085	-184.414	-193.364
14.0501	-184.954	-194.526
14.0918	-185.291	-195.219
14.1335	-186.096	-196.881
14.1751	-186.555	-198.114
14.2168	-187.125	-199.521
14.2585	-187.666	-200.754
14.3001	-188.236	-202.039
14.3418	-188.777	-203.639
14.3835	-189.388	-205.311
14.4251	-189.837	-207.074
14.4668	-190.296	-208.634
14.5085	-190.714	-210.122
14.5501	-191.182	-211.927
14.5918	-191.427	-213.874
14.6335	-192.059	-215.79
14.6751	-192.375	-217.034
14.7168	-192.559	-219.511
14.7585	-193.435	-221.774
14.8001	-193.761	-224.343
14.8418	-192.436	-223.16
14.8835	-195.668	-231.682
14.9251	-196.544	-235.087
14.9668	-196.544	-237.951
15.0085	-198.053	-242.62
15.0501	-198.736	-246.137
15.0918	-199.337	-250.877
15.1335	-200.102	-255.576
15.1751	-200.52	-260.968
15.2168	-201.366	-265.525
15.2585	-201.937	-271.244
15.3001	-202.63	-277.594
15.3418	-203.14	-285.107
15.3835	-203.853	-293.68
15.4251	-204.781	-303.609
15.4668	-205.331	-313.405
15.5085	-206.157	-324.934
15.5501	-206.983	-338.186
15.5918	-207.166	-352.926
15.6335	-208.175	-371.091
15.6751	-208.43	-386.565
15.7168	-208.716	-419.317
15.7585	-209.806	-463.965
15.8001	-210.571	-520.01
15.8418	-211.478	-618.318
15.8835	-212.355	-794.72
15.9251	-213.129	-1019.39
15.9668	-214.353	-1281.29
16.0085	-212.212
16.0501	-216.493
16.0918	-217.727
16.1335	-218.797
16.1751	-220.122
16.2168	-221.651
16.2585	-222.987
16.3001	-224.139
16.3418	-225.657
16.3835	-226.728
16.4251	-227.971
16.4668	-229.551
16.5085	-231.233
16.5501	-233.078
16.5918	-234.659
16.6335	-236.412
16.6751	-237.013
16.7168	-237.564
16.7585	-239.215
16.8001	-242.059
16.8418	-244.516
16.8835	-246.656
16.9251	-248.012
16.9668	-248.919
17.0085	-252.365
17.0501	-255.882
17.0918	-260.591
17.1335	-265.27
17.1751	-269.266
17.2168	-273.71
17.2585	-277.951
17.3001	-282.029
17.3418	-286.432
17.3835	-291.549
17.4251	-296.932
17.4668	-302.926
17.5085	-308.705
17.5501	-315.27
17.5918	-322.864
17.6335	-331.825
17.6751	-333.486
17.7168	-332.426
17.7585	-338.746
17.8001	-361.284
17.8418	-368.614
17.8835	-378.573
17.9251	-373.15
17.9668	-393.629
18.0085	-452.987
18.0501	-506.646
18.0918	-537.187
18.1335	-583.853
18.1751	-628.869
18.2168	-666.412
18.2585	-721.448
18.3001	-771.498
18.3418	-828.981
18.3835	-894.037
18.4251	-979.205
18.4598	-1052.31

## Sheet: HYDRUS
Data für die Zielfunktion: 2 x Tensionen, 1 x Endwassergehalt					18.4529	Verdunstungsrate
Time	Obs	Type	Pos	Weight		Zeitintervall		Evarate [cm/d]			Type	1-Tension	2-Wassergehalt
0.0015162	-0.662589	1	2	1		0.63831	0	0.358747			Pos	1-top	2-bot	(von oben nach unten)
0.0431829	-1.1213	1	2	1		1.05735	0	0.356458			32	Time-Variable boundary conditions+
0.0848495	-1.6208	1	2	1		1.64543	0	0.315441			18.4529	Final Time	Time Information
0.126516	-2.12029	1	2	1		2.17315	0	0.28464			860	Number of Data Points in Objective Function
0.168183	-2.61978	1	2	1		2.67968	0	0.28535		Interpolated Values	-4.52457	BC-top	[hPa]
0.20985	-3.0581	1	2	1		2.78934	0	0.289271			-3.27457	MP_top_ini	[hPa]	1
0.251516	-3.51682	1	2	1		3.64897	0	0.289112			-0.64767	MP_bot_ini	[hPa]	2
0.293183	-3.77166	1	2	1		4.02829	0	0.301847			0.60233	BC-bot	[hPa]
0.33485	-4.10805	1	2	1		4.76906	0	0.326707
0.376516	-4.41386	1	2	1		5.15624	0	0.303859
0.418183	-4.32212	1	2	1		5.74903	0	0.327819
0.45985	-4.59735	1	2	1		6.08409	0	0.297829		Real Values	-1.25	BC-top	[cm]
0.501516	-4.79103	1	2	1		6.78733	0	0.299334			0	MP_top_ini	[cm]
0.543183	-4.88277	1	2	1		7.12694	0	0.270942			0	MP_bot_ini	[cm]
0.58485	-5.12742	1	2	1		7.77949	0	0.2714			1.25	BC-bot	[cm]
0.626516	-5.3211	1	2	1		8.15289	0	0.270058
0.668183	-5.44343	1	2	1		8.79218	0	0.254027
0.70985	-5.02548	1	2	1		9.18626	0	0.27241
0.751516	-5.27013	1	2	1		9.73241	0	0.24811
0.793183	-5.35168	1	2	1		10.1016	0	0.232147
0.83485	-5.52497	1	2	1		10.7343	0	0.2517
0.876516	-5.61672	1	2	1		11.0875	0	0.248631
0.918183	-5.59633	1	2	1		11.669	0	0.256166			n
0.95985	-5.70846	1	2	1		13.2387	0	0.22886
1.00152	-5.8104	1	2	1		13.8884	0	0.158442
1.04318	-5.92253	1	2	1		14.0847	0	0.159456
1.09179	-5.8104	1	2	1		14.7266	0	0.152507
1.13346	-6.03466	1	2	1		14.9609	0	0.15871
1.17513	-6.11621	1	2	1		15.6873	0	0.151253
1.21679	-6.23853	1	2	1		15.9987	0	0.139656
1.25846	-6.29969	1	2	1		17.7681	0	0.125861
1.30013	-6.40163	1	2	1		18.4529	0	0.125861
1.34179	-6.47299	1	2	1
1.38346	-6.57492	1	2	1
1.42513	-6.59531	1	2	1
1.46679	-6.49337	1	2	1
1.50846	-6.69725	1	2	1
1.55013	-6.80938	1	2	1
1.59179	-6.80938	1	2	1
1.63346	-6.81957	1	2	1
1.67513	-6.54434	1	2	1
1.71679	-6.7686	1	2	1
1.75846	-6.81957	1	2	1
1.80013	-6.87054	1	2	1
1.84179	-6.90112	1	2	1
1.88346	-6.95209	1	2	1
1.92513	-6.95209	1	2	1
1.96679	-6.98267	1	2	1
2.00846	-7.03364	1	2	1
2.05013	-7.07441	1	2	1
2.09179	-7.12538	1	2	1
2.13346	-7.18654	1	2	1
2.17513	-7.01325	1	2	1
2.21679	-7.29867	1	2	1
2.25846	-7.39042	1	2	1
2.30013	-7.47197	1	2	1
2.34179	-7.53313	1	2	1
2.38346	-7.62487	1	2	1
2.42513	-7.70642	1	2	1
2.46679	-7.75739	1	2	1
2.50846	-7.84913	1	2	1
2.55013	-7.9001	1	2	1
2.59179	-7.95107	1	2	1
2.63346	-8.02243	1	2	1
2.67513	-8.13456	1	2	1
2.71679	-7.84913	1	2	1
2.75846	-8.07339	1	2	1
2.80013	-7.01325	1	2	1
2.84179	-7.37003	1	2	1
2.88346	-7.66565	1	2	1
2.92513	-7.87971	1	2	1
2.96679	-8.03262	1	2	1
3.00846	-8.14475	1	2	1
3.05013	-8.18552	1	2	1
3.09179	-8.36901	1	2	1
3.13346	-8.51172	1	2	1
3.17513	-8.64424	1	2	1
3.21679	-8.79715	1	2	1
3.25846	-8.88889	1	2	1
3.30013	-9.00102	1	2	1
3.34179	-9.08257	1	2	1
3.38346	-9.17431	1	2	1
3.42513	-9.29664	1	2	1
3.46679	-9.38838	1	2	1
3.50846	-9.49032	1	2	1
3.55013	-9.55148	1	2	1
3.59179	-9.6738	1	2	1
3.63346	-9.77574	1	2	1
3.67513	-9.71458	1	2	1
3.71679	-9.26606	1	2	1
3.75846	-9.61264	1	2	1
3.80013	-9.82671	1	2	1
3.84179	-9.89806	1	2	1
3.88346	-10.0714	1	2	1
3.92513	-10.2446	1	2	1
3.96679	-10.3874	1	2	1
4.00846	-10.5097	1	2	1
4.05013	-10.4179	1	2	1
4.09179	-10.6524	1	2	1
4.13346	-10.8155	1	2	1
4.17513	-11.0296	1	2	1
4.21679	-11.2538	1	2	1
4.25846	-11.4169	1	2	1
4.30013	-11.6208	1	2	1
4.34179	-11.8043	1	2	1
4.38346	-11.998	1	2	1
4.42513	-12.1814	1	2	1
4.46679	-12.3344	1	2	1
4.50846	-12.4669	1	2	1
4.55013	-12.528	1	2	1
4.59179	-12.8033	1	2	1
4.63346	-12.9664	1	2	1
4.67513	-13.0785	1	2	1
4.71679	-13.2008	1	2	1
4.75846	-13.3333	1	2	1
4.80013	-13.4353	1	2	1
4.84179	-13.5882	1	2	1
4.88346	-13.7003	1	2	1
4.92513	-13.8634	1	2	1
4.96679	-13.8838	1	2	1
5.00846	-14.0775	1	2	1
5.05013	-14.2712	1	2	1
5.09179	-14.4546	1	2	1
5.13346	-14.6687	1	2	1
5.17513	-14.8318	1	2	1
5.21679	-15.0561	1	2	1
5.25846	-15.2599	1	2	1
5.30013	-15.474	1	2	1
5.34179	-15.6779	1	2	1
5.38346	-15.8919	1	2	1
5.42513	-16.0856	1	2	1
5.46679	-16.2895	1	2	1
5.50846	-16.4934	1	2	1
5.55013	-16.6667	1	2	1
5.59179	-16.8502	1	2	1
5.63346	-17.0438	1	2	1
5.67513	-17.2477	1	2	1
5.71679	-17.4618	1	2	1
5.75846	-17.6045	1	2	1
5.80013	-17.8186	1	2	1
5.84179	-17.9817	1	2	1
5.88346	-18.1651	1	2	1
5.92513	-18.3486	1	2	1
5.96679	-18.3996	1	2	1
6.00846	-18.6035	1	2	1
6.05013	-18.8073	1	2	1
6.09179	-19.001	1	2	1
6.13346	-19.2049	1	2	1
6.17513	-19.419	1	2	1
6.21679	-19.6636	1	2	1
6.25846	-19.9286	1	2	1
6.30013	-20.1733	1	2	1
6.34179	-20.4485	1	2	1
6.38346	-20.683	1	2	1
6.42513	-20.9174	1	2	1
6.46679	-21.1723	1	2	1
6.50846	-21.4271	1	2	1
6.55013	-21.6718	1	2	1
6.59179	-21.9266	1	2	1
6.63346	-22.1407	1	2	1
6.67513	-22.3547	1	2	1
6.71679	-22.5484	1	2	1
6.75846	-22.7421	1	2	1
6.80013	-22.9256	1	2	1
6.84179	-23.1193	1	2	1
6.88346	-23.3231	1	2	1
6.92513	-23.5474	1	2	1
6.96679	-23.5576	1	2	1
7.00846	-23.8736	1	2	1
7.05013	-24.1488	1	2	1
7.09179	-24.4139	1	2	1
7.13346	-24.7197	1	2	1
7.17513	-25.0663	1	2	1
7.21679	-25.3313	1	2	1
7.25846	-25.5861	1	2	1
7.30013	-25.8512	1	2	1
7.34179	-26.1468	1	2	1
7.38346	-26.4628	1	2	1
7.42513	-26.789	1	2	1
7.46679	-27.105	1	2	1
7.50846	-27.421	1	2	1
7.55013	-27.7166	1	2	1
7.59179	-28.0122	1	2	1
7.63346	-28.3078	1	2	1
7.67513	-28.6035	1	2	1
7.71679	-28.8583	1	2	1
7.75846	-29.1233	1	2	1
7.80013	-29.368	1	2	1
7.84179	-29.7248	1	2	1
7.88346	-30.0714	1	2	1
7.92513	-30.4383	1	2	1
7.96679	-30.4077	1	2	1
8.00846	-30.9684	1	2	1
8.05013	-31.4781	1	2	1
8.09179	-31.8654	1	2	1
8.13346	-32.2732	1	2	1
8.17513	-32.7115	1	2	1
8.21679	-33.1397	1	2	1
8.25846	-33.5372	1	2	1
8.30013	-33.9551	1	2	1
8.34179	-34.3731	1	2	1
8.38346	-34.791	1	2	1
8.42513	-35.2294	1	2	1
8.46679	-35.6881	1	2	1
8.50846	-36.1162	1	2	1
8.55013	-36.524	1	2	1
8.59179	-37.054	1	2	1
8.63346	-37.5433	1	2	1
8.67513	-38.0122	1	2	1
8.71679	-38.4506	1	2	1
8.75846	-38.9399	1	2	1
8.80013	-39.3884	1	2	1
8.84179	-39.9286	1	2	1
8.88346	-40.4587	1	2	1
8.92513	-40.9786	1	2	1
8.96679	-41.5189	1	2	1
9.00846	-42.0999	1	2	1
9.05013	-42.6096	1	2	1
9.09179	-43.2416	1	2	1
9.13346	-43.945	1	2	1
9.17513	-44.6279	1	2	1
9.21679	-45.3415	1	2	1
9.25846	-46.0143	1	2	1
9.30013	-46.7074	1	2	1
9.34179	-47.37	1	2	1
9.38346	-48.0326	1	2	1
9.42513	-48.7054	1	2	1
9.46679	-49.3986	1	2	1
9.50846	-50.0917	1	2	1
9.55013	-50.6728	1	2	1
9.59179	-51.4577	1	2	1
9.63346	-52.1203	1	2	1
9.67513	-52.7319	1	2	1
9.71679	-53.3639	1	2	1
9.75846	-53.9755	1	2	1
9.80013	-54.6075	1	2	1
9.84179	-55.2599	1	2	1
9.88346	-56.0041	1	2	1
9.92513	-56.738	1	2	1
9.96679	-57.5331	1	2	1
10.0085	-58.3282	1	2	1
10.0501	-58.9908	1	2	1
10.0918	-59.9185	1	2	1
10.1335	-60.897	1	2	1
10.1751	-61.9368	1	2	1
10.2168	-63.0071	1	2	1
10.2585	-64.1081	1	2	1
10.3001	-65.2294	1	2	1
10.3418	-66.3303	1	2	1
10.3835	-67.5331	1	2	1
10.4251	-68.7462	1	2	1
10.4668	-70	1	2	1
10.5085	-71.2946	1	2	1
10.5501	-72.6707	1	2	1
10.5918	-74.0469	1	2	1
10.6335	-75.4332	1	2	1
10.6751	-76.7584	1	2	1
10.7168	-78.2569	1	2	1
10.7585	-79.7044	1	2	1
10.8001	-81.213	1	2	1
10.8418	-82.7625	1	2	1
10.8835	-84.3425	1	2	1
10.9251	-85.7288	1	2	1
10.9668	-87.4312	1	2	1
11.0085	-89.2864	1	2	1
11.0501	-91.0907	1	2	1
11.0918	-92.7217	1	2	1
11.1335	-94.5973	1	2	1
11.1751	-95.6881	1	2	1
11.2168	-98.6748	1	2	1
11.2585	-100.846	1	2	1
11.3001	-102.966	1	2	1
11.3418	-105.117	1	2	1
11.3835	-107.36	1	2	1
11.4251	-109.602	1	2	1
11.4668	-111.855	1	2	1
11.5085	-114.179	1	2	1
11.5501	-116.493	1	2	1
11.5918	-118.818	1	2	1
11.6335	-121.04	1	2	1
11.6751	-121.876	1	2	1
11.7168	-124.444	1	2	1
11.7585	-126.31	1	2	1
11.8001	-128.267	1	2	1
11.8418	-130.163	1	2	1
11.8835	-132.192	1	2	1
11.9251	-134.047	1	2	1
11.9668	-136.361	1	2	1
12.0085	-138.787	1	2	1
12.0501	-141.009	1	2	1
12.0918	-143.109	1	2	1
12.1335	-145.209	1	2	1
12.1751	-147.299	1	2	1
12.2168	-149.246	1	2	1
12.2585	-151.182	1	2	1
12.3001	-153.017	1	2	1
12.3418	-154.811	1	2	1
12.3835	-156.442	1	2	1
12.4251	-158.022	1	2	1
12.4668	-159.511	1	2	1
12.5085	-160.846	1	2	1
12.5501	-162.171	1	2	1
12.5918	-163.394	1	2	1
12.6335	-164.557	1	2	1
12.6751	-165.657	1	2	1
12.7168	-166.697	1	2	1
12.7585	-167.564	1	2	1
12.8001	-168.298	1	2	1
12.8418	-169.123	1	2	1
12.8835	-169.898	1	2	1
12.9251	-170.693	1	2	1
12.9668	-171.182	1	2	1
13.0085	-171.978	1	2	1
13.0501	-172.732	1	2	1
13.0918	-173.537	1	2	1
13.1335	-174.21	1	2	1
13.1751	-174.842	1	2	1
13.2168	-175.525	1	2	1
13.2585	-176.208	1	2	1
13.3001	-176.799	1	2	1
13.3418	-177.299	1	2	1
13.3835	-177.788	1	2	1
13.4251	-178.165	1	2	1
13.4668	-178.685	1	2	1
13.5085	-179.123	1	2	1
13.5501	-179.551	1	2	1
13.5918	-179.908	1	2	1
13.6335	-180.408	1	2	1
13.6751	-180.815	1	2	1
13.7168	-181.223	1	2	1
13.7585	-181.58	1	2	1
13.8001	-181.967	1	2	1
13.8418	-182.334	1	2	1
13.8835	-182.661	1	2	1
13.9251	-183.354	1	2	1
13.9668	-182.834	1	2	1
14.0085	-184.414	1	2	1
14.0501	-184.954	1	2	1
14.0918	-185.291	1	2	1
14.1335	-186.096	1	2	1
14.1751	-186.555	1	2	1
14.2168	-187.125	1	2	1
14.2585	-187.666	1	2	1
14.3001	-188.236	1	2	1
14.3418	-188.777	1	2	1
14.3835	-189.388	1	2	1
14.4251	-189.837	1	2	1
14.4668	-190.296	1	2	1
14.5085	-190.714	1	2	1
14.5501	-191.182	1	2	1
14.5918	-191.427	1	2	1
14.6335	-192.059	1	2	1
14.6751	-192.375	1	2	1
14.7168	-192.559	1	2	1
14.7585	-193.435	1	2	1
14.8001	-193.761	1	2	1
14.8418	-192.436	1	2	1
14.8835	-195.668	1	2	1
14.9251	-196.544	1	2	1
14.9668	-196.544	1	2	1
15.0085	-198.053	1	2	1
15.0501	-198.736	1	2	1
15.0918	-199.337	1	2	1
15.1335	-200.102	1	2	1
15.1751	-200.52	1	2	1
15.2168	-201.366	1	2	1
15.2585	-201.937	1	2	1
15.3001	-202.63	1	2	1
15.3418	-203.14	1	2	1
15.3835	-203.853	1	2	1
15.4251	-204.781	1	2	1
15.4668	-205.331	1	2	1
15.5085	-206.157	1	2	1
15.5501	-206.983	1	2	1
15.5918	-207.166	1	2	1
15.6335	-208.175	1	2	1
15.6751	-208.43	1	2	1
15.7168	-208.716	1	2	1
15.7585	-209.806	1	2	1
15.8001	-210.571	1	2	1
15.8418	-211.478	1	2	1
15.8835	-212.355	1	2	1
15.9251	-213.129	1	2	1
15.9668	-214.353	1	2	1
16.0085	-212.212	1	2	1
16.0501	-216.493	1	2	1
16.0918	-217.727	1	2	1
16.1335	-218.797	1	2	1
16.1751	-220.122	1	2	1
16.2168	-221.651	1	2	1
16.2585	-222.987	1	2	1
16.3001	-224.139	1	2	1
16.3418	-225.657	1	2	1
16.3835	-226.728	1	2	1
16.4251	-227.971	1	2	1
16.4668	-229.551	1	2	1
16.5085	-231.233	1	2	1
16.5501	-233.078	1	2	1
16.5918	-234.659	1	2	1
16.6335	-236.412	1	2	1
16.6751	-237.013	1	2	1
16.7168	-237.564	1	2	1
16.7585	-239.215	1	2	1
16.8001	-242.059	1	2	1
16.8418	-244.516	1	2	1
16.8835	-246.656	1	2	1
16.9251	-248.012	1	2	1
16.9668	-248.919	1	2	1
17.0085	-252.365	1	2	1
17.0501	-255.882	1	2	1
17.0918	-260.591	1	2	1
17.1335	-265.27	1	2	1
17.1751	-269.266	1	2	1
17.2168	-273.71	1	2	1
17.2585	-277.951	1	2	1
17.3001	-282.029	1	2	1
17.3418	-286.432	1	2	1
17.3835	-291.549	1	2	1
17.4251	-296.932	1	2	1
17.4668	-302.926	1	2	1
17.5085	-308.705	1	2	1
17.5501	-315.27	1	2	1
17.5918	-322.864	1	2	1
17.6335	-331.825	1	2	1
17.6751	-333.486	1	2	1
17.7168	-332.426	1	2	1
17.7585	-338.746	1	2	1
17.8001	-361.284	1	2	1
17.8418	-368.614	1	2	1
17.8835	-378.573	1	2	1
17.9251	-373.15	1	2	1
17.9668	-393.629	1	2	1
18.0085	-452.987	1	2	1
18.0501	-506.646	1	2	1
18.0918	-537.187	1	2	1
18.1335	-583.853	1	2	1
18.1751	-628.869	1	2	1
18.2168	-666.412	1	2	1
18.2585	-721.448	1	2	1
18.3001	-771.498	1	2	1
18.3418	-828.981	1	2	1
18.3835	-894.037	1	2	1
18.4251	-979.205	1	2	1
18.4529	-8970.44	1	1	1
0.0015162	-3.28236	1	1	1
0.0431829	-3.67992	1	1	1
0.0848495	-4.1896	1	1	1
0.126516	-4.70948	1	1	1
0.168183	-5.19878	1	1	1
0.20985	-5.6371	1	1	1
0.251516	-6.08563	1	1	1
0.293183	-6.33028	1	1	1
0.33485	-6.66667	1	1	1
0.376516	-6.97248	1	1	1
0.418183	-6.88073	1	1	1
0.45985	-7.14577	1	1	1
0.501516	-7.33945	1	1	1
0.543183	-7.38022	1	1	1
0.58485	-7.62487	1	1	1
0.626516	-7.84913	1	1	1
0.668183	-7.98165	1	1	1
0.70985	-7.55352	1	1	1
0.751516	-7.77778	1	1	1
0.793183	-7.87971	1	1	1
0.83485	-8.03262	1	1	1
0.876516	-8.13456	1	1	1
0.918183	-8.11417	1	1	1
0.95985	-8.23649	1	1	1
1.00152	-8.31804	1	1	1
1.04318	-8.44037	1	1	1
1.09179	-8.31804	1	1	1
1.13346	-8.51172	1	1	1
1.17513	-8.61366	1	1	1
1.21679	-8.72579	1	1	1
1.25846	-8.80734	1	1	1
1.30013	-8.89908	1	1	1
1.34179	-8.98063	1	1	1
1.38346	-9.06218	1	1	1
1.42513	-9.08257	1	1	1
1.46679	-8.99083	1	1	1
1.50846	-9.18451	1	1	1
1.55013	-9.29664	1	1	1
1.59179	-9.30683	1	1	1
1.63346	-9.26606	1	1	1
1.67513	-9.04179	1	1	1
1.71679	-9.25586	1	1	1
1.75846	-9.30683	1	1	1
1.80013	-9.3578	1	1	1
1.84179	-9.38838	1	1	1
1.88346	-9.43935	1	1	1
1.92513	-9.44954	1	1	1
1.96679	-9.48012	1	1	1
2.00846	-9.53109	1	1	1
2.05013	-9.56167	1	1	1
2.09179	-9.61264	1	1	1
2.13346	-9.6738	1	1	1
2.17513	-9.49032	1	1	1
2.21679	-9.77574	1	1	1
2.25846	-9.86748	1	1	1
2.30013	-9.94903	1	1	1
2.34179	-10	1	1	1
2.38346	-10.0815	1	1	1
2.42513	-10.1427	1	1	1
2.46679	-10.2243	1	1	1
2.50846	-10.3058	1	1	1
2.55013	-10.3568	1	1	1
2.59179	-10.4179	1	1	1
2.63346	-10.4893	1	1	1
2.67513	-10.5607	1	1	1
2.71679	-10.3058	1	1	1
2.75846	-10.5301	1	1	1
2.80013	-9.5209	1	1	1
2.84179	-9.82671	1	1	1
2.88346	-10.1223	1	1	1
2.92513	-10.3262	1	1	1
2.96679	-10.4791	1	1	1
3.00846	-10.5912	1	1	1
3.05013	-10.632	1	1	1
3.09179	-10.8155	1	1	1
3.13346	-10.9582	1	1	1
3.17513	-11.0703	1	1	1
3.21679	-11.1927	1	1	1
3.25846	-11.3252	1	1	1
3.30013	-11.4271	1	1	1
3.34179	-11.5189	1	1	1
3.38346	-11.6106	1	1	1
3.42513	-11.7329	1	1	1
3.46679	-11.8145	1	1	1
3.50846	-11.8654	1	1	1
3.55013	-11.9878	1	1	1
3.59179	-12.0999	1	1	1
3.63346	-12.2018	1	1	1
3.67513	-12.1101	1	1	1
3.71679	-11.6922	1	1	1
3.75846	-12.0387	1	1	1
3.80013	-12.2528	1	1	1
3.84179	-12.3547	1	1	1
3.88346	-12.4873	1	1	1
3.92513	-12.6606	1	1	1
3.96679	-12.8135	1	1	1
4.00846	-12.946	1	1	1
4.05013	-12.8746	1	1	1
4.09179	-13.0887	1	1	1
4.13346	-13.2416	1	1	1
4.17513	-13.4353	1	1	1
4.21679	-13.629	1	1	1
4.25846	-13.8328	1	1	1
4.30013	-14.0265	1	1	1
4.34179	-14.21	1	1	1
4.38346	-14.4037	1	1	1
4.42513	-14.5872	1	1	1
4.46679	-14.7401	1	1	1
4.50846	-14.8726	1	1	1
4.55013	-15.0255	1	1	1
4.59179	-15.209	1	1	1
4.63346	-15.3721	1	1	1
4.67513	-15.5046	1	1	1
4.71679	-15.6167	1	1	1
4.75846	-15.6983	1	1	1
4.80013	-15.8512	1	1	1
4.84179	-16.0041	1	1	1
4.88346	-16.1264	1	1	1
4.92513	-16.2793	1	1	1
4.96679	-16.2997	1	1	1
5.00846	-16.4424	1	1	1
5.05013	-16.6361	1	1	1
5.09179	-16.8094	1	1	1
5.13346	-17.0234	1	1	1
5.17513	-17.1865	1	1	1
5.21679	-17.421	1	1	1
5.25846	-17.6249	1	1	1
5.30013	-17.8287	1	1	1
5.34179	-18.0326	1	1	1
5.38346	-18.2671	1	1	1
5.42513	-18.4506	1	1	1
5.46679	-18.6544	1	1	1
5.50846	-18.8583	1	1	1
5.55013	-19.0316	1	1	1
5.59179	-19.2253	1	1	1
5.63346	-19.4088	1	1	1
5.67513	-19.6024	1	1	1
5.71679	-19.7859	1	1	1
5.75846	-19.9592	1	1	1
5.80013	-20.1427	1	1	1
5.84179	-20.3364	1	1	1
5.88346	-20.5199	1	1	1
5.92513	-20.7034	1	1	1
5.96679	-20.7645	1	1	1
6.00846	-20.9888	1	1	1
6.05013	-21.1927	1	1	1
6.09179	-21.3558	1	1	1
6.13346	-21.5596	1	1	1
6.17513	-21.7635	1	1	1
6.21679	-21.998	1	1	1
6.25846	-22.2528	1	1	1
6.30013	-22.5178	1	1	1
6.34179	-22.7727	1	1	1
6.38346	-23.0173	1	1	1
6.42513	-23.262	1	1	1
6.46679	-23.5168	1	1	1
6.50846	-23.7717	1	1	1
6.55013	-24.0265	1	1	1
6.59179	-24.261	1	1	1
6.63346	-24.4954	1	1	1
6.67513	-24.7197	1	1	1
6.71679	-24.893	1	1	1
6.75846	-25.0866	1	1	1
6.80013	-25.2803	1	1	1
6.84179	-25.474	1	1	1
6.88346	-25.6677	1	1	1
6.92513	-25.8919	1	1	1
6.96679	-25.9225	1	1	1
7.00846	-26.2283	1	1	1
7.05013	-26.5138	1	1	1
7.09179	-26.7686	1	1	1
7.13346	-27.054	1	1	1
7.17513	-27.3598	1	1	1
7.21679	-27.6656	1	1	1
7.25846	-27.9307	1	1	1
7.30013	-28.2059	1	1	1
7.34179	-28.4913	1	1	1
7.38346	-28.8073	1	1	1
7.42513	-29.1233	1	1	1
7.46679	-29.4393	1	1	1
7.50846	-29.7655	1	1	1
7.55013	-30.0612	1	1	1
7.59179	-30.3568	1	1	1
7.63346	-30.6524	1	1	1
7.67513	-30.948	1	1	1
7.71679	-31.1927	1	1	1
7.75846	-31.4679	1	1	1
7.80013	-31.7329	1	1	1
7.84179	-32.0795	1	1	1
7.88346	-32.4057	1	1	1
7.92513	-32.7829	1	1	1
7.96679	-32.7523	1	1	1
8.00846	-33.3435	1	1	1
8.05013	-33.8226	1	1	1
8.09179	-34.2304	1	1	1
8.13346	-34.6687	1	1	1
8.17513	-35.0561	1	1	1
8.21679	-35.4944	1	1	1
8.25846	-35.8614	1	1	1
8.30013	-36.2793	1	1	1
8.34179	-36.6871	1	1	1
8.38346	-37.156	1	1	1
8.42513	-37.5841	1	1	1
8.46679	-38.0428	1	1	1
8.50846	-38.4709	1	1	1
8.55013	-38.9501	1	1	1
8.59179	-39.4088	1	1	1
8.63346	-39.8981	1	1	1
8.67513	-40.367	1	1	1
8.71679	-40.8053	1	1	1
8.75846	-41.3048	1	1	1
8.80013	-41.7431	1	1	1
8.84179	-42.2528	1	1	1
8.88346	-42.8236	1	1	1
8.92513	-43.3333	1	1	1
8.96679	-43.8736	1	1	1
9.00846	-44.4343	1	1	1
9.05013	-44.9643	1	1	1
9.09179	-45.5861	1	1	1
9.13346	-46.2793	1	1	1
9.17513	-46.9623	1	1	1
9.21679	-47.686	1	1	1
9.25846	-48.3792	1	1	1
9.30013	-49.0724	1	1	1
9.34179	-49.735	1	1	1
9.38346	-50.3874	1	1	1
9.42513	-51.0601	1	1	1
9.46679	-51.7533	1	1	1
9.50846	-52.4057	1	1	1
9.55013	-53.1295	1	1	1
9.59179	-53.792	1	1	1
9.63346	-54.5056	1	1	1
9.67513	-55.1274	1	1	1
9.71679	-55.7492	1	1	1
9.75846	-56.3609	1	1	1
9.80013	-56.9623	1	1	1
9.84179	-57.6656	1	1	1
9.88346	-58.3588	1	1	1
9.92513	-59.1233	1	1	1
9.96679	-59.9185	1	1	1
10.0085	-60.7238	1	1	1
10.0501	-61.3863	1	1	1
10.0918	-62.2834	1	1	1
10.1335	-63.2926	1	1	1
10.1751	-64.261	1	1	1
10.2168	-65.4027	1	1	1
10.2585	-66.422	1	1	1
10.3001	-67.5841	1	1	1
10.3418	-68.736	1	1	1
10.3835	-69.9185	1	1	1
10.4251	-71.1723	1	1	1
10.4668	-72.4363	1	1	1
10.5085	-73.7207	1	1	1
10.5501	-75.1172	1	1	1
10.5918	-76.4832	1	1	1
10.6335	-77.8797	1	1	1
10.6751	-79.2253	1	1	1
10.7168	-80.7339	1	1	1
10.7585	-82.1509	1	1	1
10.8001	-83.6697	1	1	1
10.8418	-85.2497	1	1	1
10.8835	-86.8298	1	1	1
10.9251	-88.2365	1	1	1
10.9668	-90.0102	1	1	1
11.0085	-91.7839	1	1	1
11.0501	-93.6188	1	1	1
11.0918	-95.2294	1	1	1
11.1335	-97.1764	1	1	1
11.1751	-99.1539	1	1	1
11.2168	-101.264	1	1	1
11.2585	-103.507	1	1	1
11.3001	-105.607	1	1	1
11.3418	-107.849	1	1	1
11.3835	-110.071	1	1	1
11.4251	-112.355	1	1	1
11.4668	-114.638	1	1	1
11.5085	-116.942	1	1	1
11.5501	-119.317	1	1	1
11.5918	-121.641	1	1	1
11.6335	-123.894	1	1	1
11.6751	-123.394	1	1	1
11.7168	-127.258	1	1	1
11.7585	-129.144	1	1	1
11.8001	-131.101	1	1	1
11.8418	-133.058	1	1	1
11.8835	-135.076	1	1	1
11.9251	-137.003	1	1	1
11.9668	-139.348	1	1	1
12.0085	-141.794	1	1	1
12.0501	-143.955	1	1	1
12.0918	-146.167	1	1	1
12.1335	-148.155	1	1	1
12.1751	-150.408	1	1	1
12.2168	-152.385	1	1	1
12.2585	-154.383	1	1	1
12.3001	-156.249	1	1	1
12.3418	-158.084	1	1	1
12.3835	-159.786	1	1	1
12.4251	-161.335	1	1	1
12.4668	-162.864	1	1	1
12.5085	-164.271	1	1	1
12.5501	-165.617	1	1	1
12.5918	-166.891	1	1	1
12.6335	-168.114	1	1	1
12.6751	-169.246	1	1	1
12.7168	-170.347	1	1	1
12.7585	-171.203	1	1	1
12.8001	-172.018	1	1	1
12.8418	-172.864	1	1	1
12.8835	-173.741	1	1	1
12.9251	-174.424	1	1	1
12.9668	-174.964	1	1	1
13.0085	-175.851	1	1	1
13.0501	-176.748	1	1	1
13.0918	-177.543	1	1	1
13.1335	-178.369	1	1	1
13.1751	-179.103	1	1	1
13.2168	-179.847	1	1	1
13.2585	-180.622	1	1	1
13.3001	-181.315	1	1	1
13.3418	-181.855	1	1	1
13.3835	-182.477	1	1	1
13.4251	-183.058	1	1	1
13.4668	-183.71	1	1	1
13.5085	-184.312	1	1	1
13.5501	-184.964	1	1	1
13.5918	-185.535	1	1	1
13.6335	-186.188	1	1	1
13.6751	-186.82	1	1	1
13.7168	-187.411	1	1	1
13.7585	-188.135	1	1	1
13.8001	-188.848	1	1	1
13.8418	-189.572	1	1	1
13.8835	-190.367	1	1	1
13.9251	-191.223	1	1	1
13.9668	-191.437	1	1	1
14.0085	-193.364	1	1	1
14.0501	-194.526	1	1	1
14.0918	-195.219	1	1	1
14.1335	-196.881	1	1	1
14.1751	-198.114	1	1	1
14.2168	-199.521	1	1	1
14.2585	-200.754	1	1	1
14.3001	-202.039	1	1	1
14.3418	-203.639	1	1	1
14.3835	-205.311	1	1	1
14.4251	-207.074	1	1	1
14.4668	-208.634	1	1	1
14.5085	-210.122	1	1	1
14.5501	-211.927	1	1	1
14.5918	-213.874	1	1	1
14.6335	-215.79	1	1	1
14.6751	-217.034	1	1	1
14.7168	-219.511	1	1	1
14.7585	-221.774	1	1	1
14.8001	-224.343	1	1	1
14.8418	-223.16	1	1	1
14.8835	-231.682	1	1	1
14.9251	-235.087	1	1	1
14.9668	-237.951	1	1	1
15.0085	-242.62	1	1	1
15.0501	-246.137	1	1	1
15.0918	-250.877	1	1	1
15.1335	-255.576	1	1	1
15.1751	-260.968	1	1	1
15.2168	-265.525	1	1	1
15.2585	-271.244	1	1	1
15.3001	-277.594	1	1	1
15.3418	-285.107	1	1	1
15.3835	-293.68	1	1	1
15.4251	-303.609	1	1	1
15.4668	-313.405	1	1	1
15.5085	-324.934	1	1	1
15.5501	-338.186	1	1	1
15.5918	-352.926	1	1	1
15.6335	-371.091	1	1	1
15.6751	-386.565	1	1	1
15.7168	-419.317	1	1	1
15.7585	-463.965	1	1	1
15.8001	-520.01	1	1	1
15.8418	-618.318	1	1	1
15.8835	-794.72	1	1	1
15.9251	-1019.39	1	1	1
15.9668	-1281.29	1	1	1
0.63831	0.919496	2	0	100000
1.05735	0.889622	2	0	100000
1.64543	0.852521	2	0	100000
2.17315	0.822479	2	0	100000
2.67968	0.793571	2	0	100000
2.78934	0.787227	2	0	100000
3.64897	0.737521	2	0	100000
4.02829	0.714622	2	0	100000
4.76906	0.666218	2	0	100000
5.15624	0.642689	2	0	100000
5.74903	0.603824	2	0	100000
6.08409	0.583866	2	0	100000
6.78733	0.541765	2	0	100000
7.12694	0.523361	2	0	100000
7.77949	0.487941	2	0	100000
8.15289	0.467773	2	0	100000
8.79218	0.435294	2	0	100000
9.18626	0.413824	2	0	100000
9.73241	0.386723	2	0	100000
10.1016	0.36958	2	0	100000
10.7343	0.337731	2	0	100000
11.0875	0.320168	2	0	100000
11.669	0.290378	2	0	100000
13.2387	0.218529	2	0	100000
13.8884	0.197941	2	0	100000
14.0847	0.191681	2	0	100000
14.7266	0.172101	2	0	100000
14.9609	0.164664	2	0	100000
15.6873	0.142689	2	0	100000
15.9987	0.133992	2	0	100000
17.7681	0.0894538	2	0	100000
18.4529	0.0722146	2	0	100000

## Sheet: tens_interpolation
		Datum / Zeit	Tension unten [hPa]	Tension oben [hPa]
m_bot	b_bot	2012-10-28 16:19:39	0.58	3.17
10.08	-415403	2012-10-28 16:29:39	0.65	3.22
m_top	b_top	2012-10-28 16:27:28	0.634717	3.20908
7.2	-296714	y = m*x+b
		AE unten [t]	AE oben [t]
		41227.2
			Brutto-Gewicht [g]	Netto-Gewicht [g]
-1.40314	58626.9	2013-08-23 17:58:52	382.99	12.72
		2013-08-24 10:54:53	382	11.73
-1.40314	58256.7	2013-08-24 06:49:00	382.24	11.9696
			AE unten
m_bot	b_bot	2012-11-13 16:25:38	617.67	42.77
-5.99097	247606	2012-11-15 10:53:28	607.07	32.17
m_top	b_top	2012-11-16 03:19:39	602.967	28.0671
-5.99097	247031	y = m*x+b
