# Supplementary material for: A pore-size classification for peat bogs derived from unsaturated hydraulic properties
Source: Copernicus journal article supplement (doi:10.5194/hess-21-6185-2017), 2017-12-07
Supplement: Supplementary file 2 [file hess-21-6185-2017-supplement.zip]

Archive with 3 entries (3 files):
- Supplementary Infromation 2.zip
- Supplementary Information 1.zip
- hess-21-6185-2017-supplement-title-page.pdf
