# Supplementary material for: A pore-size classification for peat bogs derived from unsaturated hydraulic properties
Source: Copernicus journal article supplement (doi:10.5194/hess-21-6185-2017), 2017-12-07
Supplement: Supplementary file 3 [file D1_HYDRUS.xlsx]

## Sheet: Gewicht
Datum / Zeit	Brutto-Gewicht [g]	Netto-Gewicht [g]	Gewichtsänderung [g]	Zeit [d]	Theta [-]	Verdunstungsrate [cm/d]		Volumen	248
2012-10-28 16:27:11	803.42	244.32	0					Höhe	5
2012-10-29 07:46:55	790.46	231.36	-12.96	0.638704	0.887581	0.409095		A	49.6
2012-10-29 17:50:20	782.36	223.26	-21.06	1.05774	0.854919	0.389716		Theta0	0.939839
2012-10-30 07:56:36	772.7	213.6	-30.72	1.64543	0.815968	0.331399		Trockengewicht	11.24
2012-10-30 20:36:29	765.21	206.11	-38.21	2.17312	0.785766	0.286164		Ks (as in Ksat)
2012-10-31 08:45:48	757.91	198.81	-45.51	2.67959	0.756331	0.290595		delta System [g]	559.1
2012-10-31 11:30:00	756.36	197.26	-47.06	2.79362	0.750081	0.274056
2012-10-31 17:05:20	752.73	193.63	-50.69	3.02649	0.735444	0.314276
2012-11-01 08:01:40	742.75	183.65	-60.67	3.64895	0.695202	0.323252
2012-11-01 17:07:34	736.68	177.58	-66.74	4.02804	0.670726	0.322817
2012-11-02 10:54:30	724.52	165.42	-78.9	4.76897	0.621694	0.330885
2012-11-02 20:11:57	718.76	159.66	-84.66	5.15609	0.598468	0.299984
2012-11-03 10:25:39	709.21	150.11	-94.21	5.74894	0.55996	0.324772
2012-11-03 18:28:11	704.22	145.12	-99.2	6.08403	0.539839	0.30023
2012-11-04 11:20:53	694.09	134.99	-109.33	6.78729	0.498992	0.290409
2012-11-04 19:29:57	689.44	130.34	-113.98	7.12692	0.480242	0.276036
2012-11-05 11:08:27	681.35	122.25	-122.07	7.77866	0.447621	0.250262
2012-11-05 20:07:22	676.29	117.19	-127.13	8.15291	0.427218	0.27259
2012-11-06 11:28:29	667.49	108.39	-135.93	8.79257	0.391734	0.277363
2012-11-06 20:55:24	661.95	102.85	-141.47	9.18626	0.369395	0.283708
2012-11-07 10:02:25	654.66	95.56	-148.76	9.7328	0.34	0.268921
2012-11-07 18:53:30	650.09	90.99	-153.33	10.1016	0.321573	0.249824
2012-11-08 10:04:30	641.58	82.48	-161.84	10.7342	0.287258	0.271201
2012-11-08 18:33:08	637	77.9	-166.42	11.0875	0.26879	0.261422
2012-11-09 08:30:23	629.54	70.44	-173.88	11.6689	0.23871	0.258681
2012-11-10 22:09:27	616.37	57.27	-187.05	13.2377	0.185605	0.169253
2012-11-11 13:46:26	612.87	53.77	-190.55	13.8884	0.171492	0.108447
2012-11-11 18:29:06	611.86	52.76	-191.56	14.0847	0.167419	0.103736
2012-11-12 09:53:30	608.62	49.52	-194.8	14.7266	0.154355	0.101757
2012-11-15 10:53:10	595.64	36.54	-207.78	17.768	0.102016	0.0860428
2012-11-18 17:29:39	582.662	22.5618		21.0434	0.0496846	0.0798873

## Sheet: Tensionen
Datum / Zeit	Tension unten [hPa]	Tension oben [hPa]		Zeit [d]	MP bot(2) [cm]	MP top(1) [cm]		WÄGUNG START
2012-10-26 17:39:39	1.02	3.99		-1.94968	-1.03976	-4.06728		41210.7	-4.87258
2012-10-26 17:40:39	1.6	4.48		-1.94898	-1.63099	-4.56677		2012-10-28 16:27:11
2012-10-26 17:41:39	1.46	4.43		-1.94829	-1.48828	-4.5158
2012-10-26 17:42:39	1.48	4.44		-1.94759	-1.50866	-4.52599
2012-10-26 17:43:39	1.49	4.45		-1.9469	-1.51886	-4.53619
2012-10-26 17:44:39	1.52	4.47		-1.9462	-1.54944	-4.55657
2012-10-26 17:45:39	1.55	4.5		-1.94551	-1.58002	-4.58716
2012-10-26 17:46:39	1.55	4.5		-1.94481	-1.58002	-4.58716
2012-10-26 17:47:39	1.56	4.5		-1.94412	-1.59021	-4.58716
2012-10-26 17:48:39	1.55	4.51		-1.94343	-1.58002	-4.59735
2012-10-26 17:49:39	1.62	4.57		-1.94273	-1.65138	-4.65851
2012-10-26 17:50:39	1.65	4.62		-1.94204	-1.68196	-4.70948
2012-10-26 17:51:39	1.7	4.66		-1.94134	-1.73293	-4.75025
2012-10-26 17:52:39	1.76	4.7		-1.94065	-1.79409	-4.79103
2012-10-26 17:53:39	1.79	4.73		-1.93995	-1.82467	-4.82161
2012-10-26 17:54:39	1.8	4.73		-1.93926	-1.83486	-4.82161
2012-10-26 17:55:39	1.8	4.72		-1.93856	-1.83486	-4.81142
2012-10-26 17:56:39	1.8	4.75		-1.93787	-1.83486	-4.842
2012-10-26 17:57:39	1.81	4.76		-1.93718	-1.84506	-4.85219
2012-10-26 17:58:39	1.82	4.76		-1.93648	-1.85525	-4.85219
2012-10-26 17:59:39	1.84	4.78		-1.93579	-1.87564	-4.87258
2012-10-26 18:00:39	1.85	4.78		-1.93509	-1.88583	-4.87258
2012-10-26 18:01:39	1.83	4.77		-1.9344	-1.86544	-4.86239
2012-10-26 18:02:39	1.83	4.77		-1.9337	-1.86544	-4.86239
2012-10-26 18:03:39	1.83	4.75		-1.93301	-1.86544	-4.842
2012-10-26 18:04:39	1.84	4.79		-1.93231	-1.87564	-4.88277
2012-10-26 18:05:39	1.87	4.8		-1.93162	-1.90622	-4.89297
2012-10-26 18:06:39	1.88	4.82		-1.93093	-1.91641	-4.91335
2012-10-26 18:07:39	1.86	4.8		-1.93023	-1.89602	-4.89297
2012-10-26 18:08:39	1.88	4.82		-1.92954	-1.91641	-4.91335
2012-10-26 18:09:39	1.91	4.84		-1.92884	-1.94699	-4.93374
2012-10-26 18:10:39	1.94	4.87		-1.92815	-1.97757	-4.96432
2012-10-26 18:11:39	1.97	4.91		-1.92745	-2.00815	-5.0051
2012-10-26 18:12:39	2.01	4.95		-1.92676	-2.04893	-5.04587
2012-10-26 18:13:39	2.06	4.99		-1.92606	-2.0999	-5.08665
2012-10-26 18:14:39	2.1	5.03		-1.92537	-2.14067	-5.12742
2012-10-26 18:15:39	2.16	5.09		-1.92468	-2.20183	-5.18858
2012-10-26 18:16:39	2.22	5.14		-1.92398	-2.263	-5.23955
2012-10-26 18:17:39	2.22	5.16		-1.92329	-2.263	-5.25994
2012-10-26 18:18:39	2.25	5.18		-1.92259	-2.29358	-5.28033
2012-10-26 18:19:39	2.26	5.19		-1.9219	-2.30377	-5.29052
2012-10-26 18:20:39	2.26	5.18		-1.9212	-2.30377	-5.28033
2012-10-26 18:21:39	2.2	5.12		-1.92051	-2.24261	-5.21916
2012-10-26 18:22:39	2.16	5.1		-1.91981	-2.20183	-5.19878
2012-10-26 18:23:39	2.17	5.08		-1.91912	-2.21203	-5.17839
2012-10-26 18:24:39	2.16	5.08		-1.91843	-2.20183	-5.17839
2012-10-26 18:25:39	2.18	5.11		-1.91773	-2.22222	-5.20897
2012-10-26 18:26:39	2.24	5.16		-1.91704	-2.28338	-5.25994
2012-10-26 18:27:39	2.3	5.24		-1.91634	-2.34455	-5.34149
2012-10-26 18:28:39	2.38	5.32		-1.91565	-2.4261	-5.42304
2012-10-26 18:29:39	2.42	5.35		-1.91495	-2.46687	-5.45362
2012-10-26 18:30:39	2.42	5.33		-1.91426	-2.46687	-5.43323
2012-10-26 18:31:39	2.38	5.29		-1.91356	-2.4261	-5.39246
2012-10-26 18:32:39	2.33	5.25		-1.91287	-2.37513	-5.35168
2012-10-26 18:33:39	2.28	5.2		-1.91218	-2.32416	-5.30071
2012-10-26 18:34:39	2.24	5.16		-1.91148	-2.28338	-5.25994
2012-10-26 18:35:39	2.25	5.18		-1.91079	-2.29358	-5.28033
2012-10-26 18:36:39	2.26	5.17		-1.91009	-2.30377	-5.27013
2012-10-26 18:37:39	2.26	5.19		-1.9094	-2.30377	-5.29052
2012-10-26 18:38:39	2.28	5.2		-1.9087	-2.32416	-5.30071
2012-10-26 18:39:39	2.3	5.22		-1.90801	-2.34455	-5.3211
2012-10-26 18:49:39	2.47	5.39		-1.90106	-2.51784	-5.49439
2012-10-26 18:59:39	2.49	5.4		-1.89412	-2.53823	-5.50459
2012-10-26 19:09:39	2.33	5.24		-1.88718	-2.37513	-5.34149
2012-10-26 19:19:39	2.2	5.12		-1.88023	-2.24261	-5.21916
2012-10-26 19:29:39	2.12	5.04		-1.87329	-2.16106	-5.13761
2012-10-26 19:39:39	2.16	5.06		-1.86634	-2.20183	-5.158
2012-10-26 19:49:39	2.04	4.96		-1.8594	-2.07951	-5.05607
2012-10-26 19:59:39	2.13	5.04		-1.85245	-2.17125	-5.13761
2012-10-26 20:09:39	2.17	5.1		-1.84551	-2.21203	-5.19878
2012-10-26 20:19:39	2.26	5.18		-1.83856	-2.30377	-5.28033
2012-10-26 20:29:39	2.23	5.14		-1.83162	-2.27319	-5.23955
2012-10-26 20:39:39	2.2	5.12		-1.82468	-2.24261	-5.21916
2012-10-26 20:49:39	2.11	5.02		-1.81773	-2.15087	-5.11723
2012-10-26 20:59:39	2.11	5.02		-1.81079	-2.15087	-5.11723
2012-10-26 21:09:39	2.23	5.15		-1.80384	-2.27319	-5.24975
2012-10-26 21:19:39	2.17	5.07		-1.7969	-2.21203	-5.1682
2012-10-26 21:29:39	2.16	5.07		-1.78995	-2.20183	-5.1682
2012-10-26 21:39:39	2.34	5.24		-1.78301	-2.38532	-5.34149
2012-10-26 21:49:39	2.4	5.29		-1.77606	-2.44648	-5.39246
2012-10-26 21:59:39	2.51	5.41		-1.76912	-2.55861	-5.51478
2012-10-26 22:09:39	2.69	5.59		-1.76218	-2.7421	-5.69827
2012-10-26 22:19:39	2.84	5.74		-1.75523	-2.89501	-5.85117
2012-10-26 22:29:39	2.87	5.77		-1.74829	-2.92559	-5.88175
2012-10-26 22:39:39	2.91	5.8		-1.74134	-2.96636	-5.91233
2012-10-26 22:49:39	2.97	5.87		-1.7344	-3.02752	-5.98369
2012-10-26 22:59:39	3.02	5.91		-1.72745	-3.07849	-6.02446
2012-10-26 23:09:39	3.09	5.99		-1.72051	-3.14985	-6.10601
2012-10-26 23:19:39	3.11	6		-1.71356	-3.17023	-6.11621
2012-10-26 23:29:39	2	4.89		-1.70662	-2.03874	-4.98471
2012-10-26 23:39:39	1.99	4.88		-1.69968	-2.02854	-4.97452
2012-10-26 23:49:39	1.99	4.87		-1.69273	-2.02854	-4.96432
2012-10-26 23:59:39	1.98	4.86		-1.68579	-2.01835	-4.95413
2012-10-27 00:09:39	1.99	4.87		-1.67884	-2.02854	-4.96432
2012-10-27 00:19:39	1.99	4.87		-1.6719	-2.02854	-4.96432
2012-10-27 00:29:39	1.99	4.87		-1.66495	-2.02854	-4.96432
2012-10-27 00:39:39	2.01	4.89		-1.65801	-2.04893	-4.98471
2012-10-27 00:49:39	2	4.87		-1.65106	-2.03874	-4.96432
2012-10-27 00:59:39	2	4.88		-1.64412	-2.03874	-4.97452
2012-10-27 01:09:39	2	4.88		-1.63718	-2.03874	-4.97452
2012-10-27 01:19:39	2.01	4.89		-1.63023	-2.04893	-4.98471
2012-10-27 01:29:39	1.88	4.76		-1.62329	-1.91641	-4.85219
2012-10-27 01:39:39	1.92	4.79		-1.61634	-1.95719	-4.88277
2012-10-27 01:49:39	1.95	4.82		-1.6094	-1.98777	-4.91335
2012-10-27 01:59:39	1.99	4.85		-1.60245	-2.02854	-4.94393
2012-10-27 02:09:39	1.98	4.85		-1.59551	-2.01835	-4.94393
2012-10-27 02:19:39	2	4.87		-1.58856	-2.03874	-4.96432
2012-10-27 02:29:39	1.98	4.86		-1.58162	-2.01835	-4.95413
2012-10-27 02:39:39	2.01	4.89		-1.57468	-2.04893	-4.98471
2012-10-27 02:49:39	2.03	4.91		-1.56773	-2.06932	-5.0051
2012-10-27 02:59:39	2.04	4.91		-1.56079	-2.07951	-5.0051
2012-10-27 03:09:39	2.05	4.92		-1.55384	-2.0897	-5.01529
2012-10-27 03:19:39	2.05	4.93		-1.5469	-2.0897	-5.02548
2012-10-27 03:29:39	2.06	4.93		-1.53995	-2.0999	-5.02548
2012-10-27 03:39:39	2.08	4.96		-1.53301	-2.12029	-5.05607
2012-10-27 03:49:39	2.09	4.96		-1.52606	-2.13048	-5.05607
2012-10-27 03:59:39	2.11	4.98		-1.51912	-2.15087	-5.07645
2012-10-27 04:09:39	2.11	4.98		-1.51218	-2.15087	-5.07645
2012-10-27 04:19:39	2.12	4.99		-1.50523	-2.16106	-5.08665
2012-10-27 04:29:39	2.13	5		-1.49829	-2.17125	-5.09684
2012-10-27 04:39:39	2.13	5.01		-1.49134	-2.17125	-5.10703
2012-10-27 04:49:39	2.14	5.02		-1.4844	-2.18145	-5.11723
2012-10-27 04:59:39	2.16	5.03		-1.47745	-2.20183	-5.12742
2012-10-27 05:09:39	2.11	4.98		-1.47051	-2.15087	-5.07645
2012-10-27 05:19:39	2.14	5.02		-1.46356	-2.18145	-5.11723
2012-10-27 05:29:39	2.15	5.03		-1.45662	-2.19164	-5.12742
2012-10-27 05:39:39	2.15	5.04		-1.44968	-2.19164	-5.13761
2012-10-27 05:49:39	2.16	5.05		-1.44273	-2.20183	-5.14781
2012-10-27 05:59:39	2.18	5.07		-1.43579	-2.22222	-5.1682
2012-10-27 06:09:39	2.19	5.07		-1.42884	-2.23242	-5.1682
2012-10-27 06:19:39	2.2	5.08		-1.4219	-2.24261	-5.17839
2012-10-27 06:29:39	2.22	5.1		-1.41495	-2.263	-5.19878
2012-10-27 06:39:39	2.18	5.06		-1.40801	-2.22222	-5.158
2012-10-27 06:49:39	2.21	5.09		-1.40106	-2.2528	-5.18858
2012-10-27 06:59:39	2.22	5.1		-1.39412	-2.263	-5.19878
2012-10-27 07:09:39	2.24	5.11		-1.38718	-2.28338	-5.20897
2012-10-27 07:19:39	2.22	5.1		-1.38023	-2.263	-5.19878
2012-10-27 07:29:39	2.25	5.13		-1.37329	-2.29358	-5.22936
2012-10-27 07:39:39	2.26	5.15		-1.36634	-2.30377	-5.24975
2012-10-27 07:49:39	2.28	5.16		-1.3594	-2.32416	-5.25994
2012-10-27 07:59:39	2.3	5.15		-1.35245	-2.34455	-5.24975
2012-10-27 08:09:39	2.29	5.17		-1.34551	-2.33435	-5.27013
2012-10-27 08:19:39	2.3	5.19		-1.33856	-2.34455	-5.29052
2012-10-27 08:29:39	2.3	5.19		-1.33162	-2.34455	-5.29052
2012-10-27 08:39:39	2.31	5.19		-1.32468	-2.35474	-5.29052
2012-10-27 08:49:39	2.33	5.21		-1.31773	-2.37513	-5.31091
2012-10-27 08:59:39	2.36	5.22		-1.31079	-2.40571	-5.3211
2012-10-27 09:09:39	2.35	5.23		-1.30384	-2.39551	-5.33129
2012-10-27 09:19:39	2.37	5.25		-1.2969	-2.4159	-5.35168
2012-10-27 09:29:39	2.36	5.25		-1.28995	-2.40571	-5.35168
2012-10-27 09:39:39	2.38	5.24		-1.28301	-2.4261	-5.34149
2012-10-27 09:49:39	2.39	5.27		-1.27606	-2.43629	-5.37207
2012-10-27 09:59:39	2.4	5.27		-1.26912	-2.44648	-5.37207
2012-10-27 10:09:39	2.4	5.28		-1.26218	-2.44648	-5.38226
2012-10-27 10:19:39	2.41	5.29		-1.25523	-2.45668	-5.39246
2012-10-27 10:29:39	1.88	4.74		-1.24829	-1.91641	-4.8318
2012-10-27 10:39:39	1.91	4.77		-1.24134	-1.94699	-4.86239
2012-10-27 10:49:39	1.97	4.84		-1.2344	-2.00815	-4.93374
2012-10-27 10:59:39	1.9	4.76		-1.22745	-1.9368	-4.85219
2012-10-27 11:09:39	1.88	4.76		-1.22051	-1.91641	-4.85219
2012-10-27 11:19:39	1.89	4.78		-1.21356	-1.92661	-4.87258
2012-10-27 11:29:39	2	4.88		-1.20662	-2.03874	-4.97452
2012-10-27 11:39:39	1.99	4.87		-1.19968	-2.02854	-4.96432
2012-10-27 11:49:39	2.02	4.88		-1.19273	-2.05912	-4.97452
2012-10-27 11:59:39	2.07	4.95		-1.18579	-2.11009	-5.04587
2012-10-27 12:09:39	2.1	4.96		-1.17884	-2.14067	-5.05607
2012-10-27 12:19:39	2.21	5.06		-1.1719	-2.2528	-5.158
2012-10-27 12:29:39	2.23	5.09		-1.16495	-2.27319	-5.18858
2012-10-27 12:39:39	2.3	5.16		-1.15801	-2.34455	-5.25994
2012-10-27 12:49:39	2.32	5.19		-1.15106	-2.36493	-5.29052
2012-10-27 12:59:39	2.37	5.22		-1.14412	-2.4159	-5.3211
2012-10-27 13:09:39	2.38	5.22		-1.13718	-2.4261	-5.3211
2012-10-27 13:19:39	2.34	5.17		-1.13023	-2.38532	-5.27013
2012-10-27 13:29:39	2.29	5.11		-1.12329	-2.33435	-5.20897
2012-10-27 13:39:39	2.24	5.05		-1.11634	-2.28338	-5.14781
2012-10-27 13:49:39	2.2	5.04		-1.1094	-2.24261	-5.13761
2012-10-27 13:59:39	2.19	5		-1.10245	-2.23242	-5.09684
2012-10-27 14:09:39	2.26	5.08		-1.09551	-2.30377	-5.17839
2012-10-27 14:19:39	2.21	5.03		-1.08856	-2.2528	-5.12742
2012-10-27 14:29:39	2.35	5.14		-1.08162	-2.39551	-5.23955
2012-10-27 14:39:39	2.43	5.21		-1.07468	-2.47706	-5.31091
2012-10-27 14:49:39	2.54	5.33		-1.06773	-2.58919	-5.43323
2012-10-27 14:59:39	2.38	5.15		-1.06079	-2.4261	-5.24975
2012-10-27 15:09:39	2.42	5.2		-1.05384	-2.46687	-5.30071
2012-10-27 15:19:39	2.48	5.25		-1.0469	-2.52803	-5.35168
2012-10-27 15:29:39	2.66	5.42		-1.03995	-2.71152	-5.52497
2012-10-27 15:39:39	2.63	5.38		-1.03301	-2.68094	-5.4842
2012-10-27 15:49:39	2.63	5.37		-1.02606	-2.68094	-5.47401
2012-10-27 15:59:39	2.77	5.52		-1.01912	-2.82365	-5.62691
2012-10-27 16:09:39	2.72	5.46		-1.01218	-2.77268	-5.56575
2012-10-27 16:19:39	1.91	4.69		-1.00523	-1.94699	-4.78084
2012-10-27 16:29:39	-0.33	2.42		-0.998287	0.336391	-2.46687
2012-10-27 16:39:39	0.2	2.9		-0.991343	-0.203874	-2.95617
2012-10-27 16:49:39	0.38	3.07		-0.984398	-0.38736	-3.12946
2012-10-27 16:59:39	0.07	2.81		-0.977454	-0.0713558	-2.86442
2012-10-27 17:09:39	0.17	2.89		-0.970509	-0.173293	-2.94597
2012-10-27 17:19:39	0.23	2.9		-0.963565	-0.234455	-2.95617
2012-10-27 17:29:39	0.27	2.96		-0.95662	-0.275229	-3.01733
2012-10-27 17:39:39	0.31	3		-0.949676	-0.316004	-3.0581
2012-10-27 17:49:39	0.32	3.04		-0.942731	-0.326198	-3.09888
2012-10-27 17:59:39	0.35	3.04		-0.935787	-0.356779	-3.09888
2012-10-27 18:09:39	0.39	3.05		-0.928843	-0.397554	-3.10907
2012-10-27 18:19:39	0.4	3.09		-0.921898	-0.407747	-3.14985
2012-10-27 18:29:39	0.41	3.08		-0.914954	-0.417941	-3.13965
2012-10-27 18:39:39	0.43	3.11		-0.908009	-0.438328	-3.17023
2012-10-27 18:49:39	0.44	3.14		-0.901065	-0.448522	-3.20082
2012-10-27 18:59:39	0.46	3.15		-0.89412	-0.468909	-3.21101
2012-10-27 19:09:39	0.48	3.17		-0.887176	-0.489297	-3.2314
2012-10-27 19:19:39	0.5	3.18		-0.880231	-0.509684	-3.24159
2012-10-27 19:29:39	0.52	3.2		-0.873287	-0.530071	-3.26198
2012-10-27 19:39:39	0.54	3.22		-0.866343	-0.550459	-3.28236
2012-10-27 19:49:39	0.55	3.23		-0.859398	-0.560652	-3.29256
2012-10-27 19:59:39	0.56	3.23		-0.852454	-0.570846	-3.29256
2012-10-27 20:09:39	0.57	3.25		-0.845509	-0.58104	-3.31295
2012-10-27 20:19:39	0.59	3.27		-0.838565	-0.601427	-3.33333
2012-10-27 20:29:39	0.6	3.27		-0.83162	-0.611621	-3.33333
2012-10-27 20:39:39	0.61	3.28		-0.824676	-0.621814	-3.34353
2012-10-27 20:49:39	0.62	3.29		-0.817731	-0.632008	-3.35372
2012-10-27 20:59:39	0.62	3.3		-0.810787	-0.632008	-3.36391
2012-10-27 21:09:39	0.64	3.3		-0.803843	-0.652396	-3.36391
2012-10-27 21:19:39	0.66	3.32		-0.796898	-0.672783	-3.3843
2012-10-27 21:29:39	0.67	3.34		-0.789954	-0.682977	-3.40469
2012-10-27 21:39:39	0.68	3.34		-0.783009	-0.69317	-3.40469
2012-10-27 21:49:39	0.69	3.36		-0.776065	-0.703364	-3.42508
2012-10-27 21:59:39	0.7	3.37		-0.76912	-0.713558	-3.43527
2012-10-27 22:09:39	0.71	3.37		-0.762176	-0.723751	-3.43527
2012-10-27 22:19:39	0.71	3.37		-0.755231	-0.723751	-3.43527
2012-10-27 22:29:39	0.72	3.39		-0.748287	-0.733945	-3.45566
2012-10-27 22:39:39	0.74	3.4		-0.741343	-0.754332	-3.46585
2012-10-27 22:49:39	0.75	3.41		-0.734398	-0.764526	-3.47604
2012-10-27 22:59:39	0.75	3.41		-0.727454	-0.764526	-3.47604
2012-10-27 23:09:39	0.77	3.43		-0.720509	-0.784913	-3.49643
2012-10-27 23:19:39	0.78	3.44		-0.713565	-0.795107	-3.50663
2012-10-27 23:29:39	0.79	3.44		-0.70662	-0.805301	-3.50663
2012-10-27 23:39:39	0.71	3.36		-0.699676	-0.723751	-3.42508
2012-10-27 23:49:39	0.74	3.4		-0.692731	-0.754332	-3.46585
2012-10-27 23:59:39	0.64	3.29		-0.685787	-0.652396	-3.35372
2012-10-28 00:09:39	0.69	3.33		-0.678843	-0.703364	-3.3945
2012-10-28 00:19:39	0.72	3.36		-0.671898	-0.733945	-3.42508
2012-10-28 00:29:39	0.73	3.38		-0.664954	-0.744139	-3.44546
2012-10-28 00:39:39	0.76	3.4		-0.658009	-0.77472	-3.46585
2012-10-28 00:49:39	0.78	3.42		-0.651065	-0.795107	-3.48624
2012-10-28 00:59:39	0.79	3.42		-0.64412	-0.805301	-3.48624
2012-10-28 01:09:39	0.8	3.43		-0.637176	-0.815494	-3.49643
2012-10-28 01:19:39	0.8	3.45		-0.630231	-0.815494	-3.51682
2012-10-28 01:29:39	0.81	3.45		-0.623287	-0.825688	-3.51682
2012-10-28 01:39:39	0.82	3.45		-0.616343	-0.835882	-3.51682
2012-10-28 01:49:39	0.8	3.43		-0.609398	-0.815494	-3.49643
2012-10-28 01:59:39	0.81	3.43		-0.602454	-0.825688	-3.49643
2012-10-28 02:09:39	0.82	3.45		-0.595509	-0.835882	-3.51682
2012-10-28 02:19:39	0.83	3.45		-0.588565	-0.846075	-3.51682
2012-10-28 02:29:39	0.85	3.46		-0.58162	-0.866463	-3.52701
2012-10-28 02:39:39	0.73	3.34		-0.574676	-0.744139	-3.40469
2012-10-28 02:49:39	0.76	3.37		-0.567731	-0.77472	-3.43527
2012-10-28 02:59:39	0.78	3.39		-0.560787	-0.795107	-3.45566
2012-10-28 03:09:39	0.88	3.47		-0.553843	-0.897044	-3.53721
2012-10-28 03:19:39	0.89	3.48		-0.546898	-0.907238	-3.5474
2012-10-28 03:29:39	0.9	3.48		-0.539954	-0.917431	-3.5474
2012-10-28 03:39:39	0.91	3.48		-0.533009	-0.927625	-3.5474
2012-10-28 03:49:39	0.91	3.48		-0.526065	-0.927625	-3.5474
2012-10-28 03:59:39	0.93	3.5		-0.51912	-0.948012	-3.56779
2012-10-28 04:09:39	0.93	3.5		-0.512176	-0.948012	-3.56779
2012-10-28 04:19:39	0.88	3.46		-0.505231	-0.897044	-3.52701
2012-10-28 04:29:39	0.91	3.47		-0.498287	-0.927625	-3.53721
2012-10-28 04:39:39	0.93	3.49		-0.491343	-0.948012	-3.55759
2012-10-28 04:49:39	0.92	3.49		-0.484398	-0.937819	-3.55759
2012-10-28 04:59:39	0.94	3.51		-0.477454	-0.958206	-3.57798
2012-10-28 05:09:39	0.96	3.52		-0.470509	-0.978593	-3.58818
2012-10-28 05:19:39	0.96	3.52		-0.463565	-0.978593	-3.58818
2012-10-28 05:29:39	0.97	3.53		-0.45662	-0.988787	-3.59837
2012-10-28 05:39:39	0.99	3.54		-0.449676	-1.00917	-3.60856
2012-10-28 05:49:39	1	3.54		-0.442731	-1.01937	-3.60856
2012-10-28 05:59:39	0.99	3.55		-0.435787	-1.00917	-3.61876
2012-10-28 06:09:39	0.99	3.54		-0.428843	-1.00917	-3.60856
2012-10-28 06:19:39	1	3.55		-0.421898	-1.01937	-3.61876
2012-10-28 06:29:39	0.99	3.53		-0.414954	-1.00917	-3.59837
2012-10-28 06:39:39	1.01	3.55		-0.408009	-1.02956	-3.61876
2012-10-28 06:49:39	1.03	3.56		-0.401065	-1.04995	-3.62895
2012-10-28 06:59:39	1.03	3.56		-0.39412	-1.04995	-3.62895
2012-10-28 07:09:39	1.04	3.57		-0.387176	-1.06014	-3.63914
2012-10-28 07:19:39	1.05	3.58		-0.380231	-1.07034	-3.64934
2012-10-28 07:29:39	1.06	3.59		-0.373287	-1.08053	-3.65953
2012-10-28 07:39:39	1.04	3.56		-0.366343	-1.06014	-3.62895
2012-10-28 07:49:39	1.07	3.59		-0.359398	-1.09072	-3.65953
2012-10-28 07:59:39	1.07	3.6		-0.352454	-1.09072	-3.66972
2012-10-28 08:09:39	1.08	3.6		-0.345509	-1.10092	-3.66972
2012-10-28 08:19:39	1.09	3.61		-0.338565	-1.11111	-3.67992
2012-10-28 08:29:39	1.09	3.61		-0.33162	-1.11111	-3.67992
2012-10-28 08:39:39	1.06	3.58		-0.324676	-1.08053	-3.64934
2012-10-28 08:49:39	1.08	3.6		-0.317731	-1.10092	-3.66972
2012-10-28 08:59:39	1.08	3.59		-0.310787	-1.10092	-3.65953
2012-10-28 09:09:39	1.09	3.61		-0.303843	-1.11111	-3.67992
2012-10-28 09:19:39	1.1	3.61		-0.296898	-1.1213	-3.67992
2012-10-28 09:29:39	1.11	3.62		-0.289954	-1.1315	-3.69011
2012-10-28 09:39:39	1.11	3.63		-0.283009	-1.1315	-3.70031
2012-10-28 09:49:39	1.13	3.63		-0.276065	-1.15189	-3.70031
2012-10-28 09:59:39	1.13	3.63		-0.26912	-1.15189	-3.70031
2012-10-28 10:09:39	1.15	3.63		-0.262176	-1.17227	-3.70031
2012-10-28 10:19:39	1.16	3.63		-0.255231	-1.18247	-3.70031
2012-10-28 10:29:39	1.15	3.65		-0.248287	-1.17227	-3.72069
2012-10-28 10:39:39	1.15	3.66		-0.241343	-1.17227	-3.73089
2012-10-28 10:49:39	1.16	3.66		-0.234398	-1.18247	-3.73089
2012-10-28 10:59:39	1.18	3.65		-0.227454	-1.20285	-3.72069
2012-10-28 11:09:39	1.18	3.65		-0.220509	-1.20285	-3.72069
2012-10-28 11:19:39	1.19	3.66		-0.213565	-1.21305	-3.73089
2012-10-28 11:29:39	1.19	3.68		-0.20662	-1.21305	-3.75127
2012-10-28 11:39:39	1.2	3.69		-0.199676	-1.22324	-3.76147
2012-10-28 11:49:39	1.2	3.69		-0.192731	-1.22324	-3.76147
2012-10-28 11:59:39	1.22	3.69		-0.185787	-1.24363	-3.76147
2012-10-28 12:09:39	1.22	3.71		-0.178843	-1.24363	-3.78186
2012-10-28 12:19:39	1.13	3.59		-0.171898	-1.15189	-3.65953
2012-10-28 12:29:39	1.15	3.63		-0.164954	-1.17227	-3.70031
2012-10-28 12:39:39	1.17	3.64		-0.158009	-1.19266	-3.7105
2012-10-28 12:49:39	1.2	3.66		-0.151065	-1.22324	-3.73089
2012-10-28 12:59:39	1.19	3.68		-0.14412	-1.21305	-3.75127
2012-10-28 13:09:39	1.22	3.68		-0.137176	-1.24363	-3.75127
2012-10-28 13:19:39	1.23	3.69		-0.130231	-1.25382	-3.76147
2012-10-28 13:29:39	1.23	3.7		-0.123287	-1.25382	-3.77166
2012-10-28 13:39:39	1.24	3.71		-0.116343	-1.26402	-3.78186
2012-10-28 13:49:39	1.23	3.71		-0.109398	-1.25382	-3.78186
2012-10-28 13:59:39	1.24	3.7		-0.102454	-1.26402	-3.77166
2012-10-28 14:09:39	1.25	3.72		-0.0955093	-1.27421	-3.79205
2012-10-28 14:19:39	1.24	3.72		-0.0885648	-1.26402	-3.79205
2012-10-28 14:29:39	1.24	3.72		-0.0816204	-1.26402	-3.79205
2012-10-28 14:39:39	1.26	3.72		-0.0746759	-1.2844	-3.79205
2012-10-28 14:49:39	1.23	3.73		-0.0677315	-1.25382	-3.80224
2012-10-28 14:59:39	1.25	3.73		-0.060787	-1.27421	-3.80224
2012-10-28 15:09:39	1.27	3.73		-0.0538426	-1.2946	-3.80224
2012-10-28 15:19:39	1.26	3.73		-0.0468981	-1.2844	-3.80224
2012-10-28 15:29:39	1.26	3.73		-0.0399537	-1.2844	-3.80224
2012-10-28 15:39:39	1.28	3.74		-0.0330093	-1.30479	-3.81244
2012-10-28 15:49:39	1.28	3.75		-0.0260648	-1.30479	-3.82263
2012-10-28 15:59:39	1.27	3.73		-0.0191204	-1.2946	-3.80224
2012-10-28 16:09:39	0.95	3.38		-0.0121759	-0.9684	-3.44546
2012-10-28 16:19:39	1.02	3.45		-0.00523148	-1.03976	-3.51682
2012-10-28 16:29:39	1.12	3.57		0.00171296	-1.14169	-3.63914
2012-10-28 16:39:39	1.2	3.62		0.00865741	-1.22324	-3.69011	2012-10-28 16:29:39
2012-10-28 16:49:39	1.31	3.73		0.0156019	-1.33537	-3.80224
2012-10-28 16:59:39	1.41	3.82		0.0225463	-1.43731	-3.89399
2012-10-28 17:09:39	1.49	3.92		0.0294907	-1.51886	-3.99592
2012-10-28 17:19:39	1.59	4		0.0364352	-1.6208	-4.07747
2012-10-28 17:29:39	1.67	4.1		0.0433796	-1.70234	-4.17941	2012-10-28 17:29:39
2012-10-28 17:39:39	1.77	4.19		0.0503241	-1.80428	-4.27115
2012-10-28 17:49:39	1.88	4.27		0.0572685	-1.91641	-4.3527
2012-10-28 17:59:39	1.93	4.34		0.064213	-1.96738	-4.42406
2012-10-28 18:09:39	1.96	4.38		0.0711574	-1.99796	-4.46483
2012-10-28 18:19:39	2.05	4.44		0.0781019	-2.0897	-4.52599
2012-10-28 18:29:39	2.1	4.5		0.0850463	-2.14067	-4.58716	2012-10-28 18:29:39
2012-10-28 18:39:39	2.14	4.55		0.0919907	-2.18145	-4.63812
2012-10-28 18:49:39	2.23	4.64		0.0989352	-2.27319	-4.72987
2012-10-28 18:59:39	2.26	4.67		0.10588	-2.30377	-4.76045
2012-10-28 19:09:39	2.32	4.7		0.112824	-2.36493	-4.79103
2012-10-28 19:19:39	2.38	4.78		0.119769	-2.4261	-4.87258
2012-10-28 19:29:39	2.43	4.82		0.126713	-2.47706	-4.91335	2012-10-28 19:29:39
2012-10-28 19:39:39	2.49	4.88		0.133657	-2.53823	-4.97452
2012-10-28 19:49:39	2.34	4.76		0.140602	-2.38532	-4.85219
2012-10-28 19:59:39	2.39	4.8		0.147546	-2.43629	-4.89297
2012-10-28 20:09:39	2.52	4.9		0.154491	-2.56881	-4.9949
2012-10-28 20:19:39	2.57	4.98		0.161435	-2.61978	-5.07645
2012-10-28 20:29:39	2.62	5.01		0.16838	-2.67074	-5.10703	2012-10-28 20:29:39
2012-10-28 20:39:39	2.64	5.06		0.175324	-2.69113	-5.158
2012-10-28 20:49:39	2.7	5.09		0.182269	-2.75229	-5.18858
2012-10-28 20:59:39	2.76	5.14		0.189213	-2.81346	-5.23955
2012-10-28 21:09:39	2.8	5.19		0.196157	-2.85423	-5.29052
2012-10-28 21:19:39	2.86	5.26		0.203102	-2.91539	-5.36188
2012-10-28 21:29:39	2.91	5.29		0.210046	-2.96636	-5.39246	2012-10-28 21:29:39
2012-10-28 21:39:39	2.93	5.33		0.216991	-2.98675	-5.43323
2012-10-28 21:49:39	2.98	5.37		0.223935	-3.03772	-5.47401
2012-10-28 21:59:39	3.04	5.44		0.23088	-3.09888	-5.54536
2012-10-28 22:09:39	3.1	5.51		0.237824	-3.16004	-5.61672
2012-10-28 22:19:39	3.16	5.55		0.244769	-3.2212	-5.65749
2012-10-28 22:29:39	3.18	5.56		0.251713	-3.24159	-5.66769	2012-10-28 22:29:39
2012-10-28 22:39:39	3.24	5.64		0.258657	-3.30275	-5.74924
2012-10-28 22:49:39	3.3	5.71		0.265602	-3.36391	-5.82059
2012-10-28 22:59:39	3.29	5.7		0.272546	-3.35372	-5.8104
2012-10-28 23:09:39	3.36	5.76		0.279491	-3.42508	-5.87156
2012-10-28 23:19:39	3.39	5.8		0.286435	-3.45566	-5.91233
2012-10-28 23:29:39	3.4	5.8		0.29338	-3.46585	-5.91233	2012-10-28 23:29:39
2012-10-28 23:39:39	3.43	5.83		0.300324	-3.49643	-5.94292
2012-10-28 23:49:39	3.49	5.9		0.307269	-3.55759	-6.01427
2012-10-28 23:59:39	3.5	5.89		0.314213	-3.56779	-6.00408
2012-10-29 00:09:39	3.57	5.98		0.321157	-3.63914	-6.09582
2012-10-29 00:19:39	3.63	6.03		0.328102	-3.70031	-6.14679
2012-10-29 00:29:39	3.63	6.03		0.335046	-3.70031	-6.14679	2012-10-29 00:29:39
2012-10-29 00:39:39	3.67	6.06		0.341991	-3.74108	-6.17737
2012-10-29 00:49:39	3.69	6.09		0.348935	-3.76147	-6.20795
2012-10-29 00:59:39	3.75	6.15		0.35588	-3.82263	-6.26911
2012-10-29 01:09:39	3.82	6.21		0.362824	-3.89399	-6.33028
2012-10-29 01:19:39	3.88	6.27		0.369769	-3.95515	-6.39144
2012-10-29 01:29:39	3.9	6.29		0.376713	-3.97554	-6.41182	2012-10-29 01:29:39
2012-10-29 01:39:39	3.95	6.34		0.383657	-4.0265	-6.46279
2012-10-29 01:49:39	4	6.39		0.390602	-4.07747	-6.51376
2012-10-29 01:59:39	4.05	6.45		0.397546	-4.12844	-6.57492
2012-10-29 02:09:39	4.11	6.51		0.404491	-4.1896	-6.63609
2012-10-29 02:19:39	4.16	6.54		0.411435	-4.24057	-6.66667
2012-10-29 02:29:39	4.2	6.59		0.41838	-4.28135	-6.71764	2012-10-29 02:29:39
2012-10-29 02:39:39	4.24	6.63		0.425324	-4.32212	-6.75841
2012-10-29 02:49:39	4.24	6.63		0.432269	-4.32212	-6.75841
2012-10-29 02:59:39	4.26	6.64		0.439213	-4.34251	-6.7686
2012-10-29 03:09:39	4.25	6.64		0.446157	-4.33231	-6.7686
2012-10-29 03:19:39	4.27	6.66		0.453102	-4.3527	-6.78899
2012-10-29 03:29:39	3.97	6.36		0.460046	-4.04689	-6.48318	2012-10-29 03:29:39
2012-10-29 03:39:39	3.99	6.38		0.466991	-4.06728	-6.50357
2012-10-29 03:49:39	4.02	6.4		0.473935	-4.09786	-6.52396
2012-10-29 03:59:39	4.05	6.44		0.48088	-4.12844	-6.56473
2012-10-29 04:09:39	4.09	6.47		0.487824	-4.16922	-6.59531
2012-10-29 04:19:39	4.13	6.52		0.494769	-4.20999	-6.64628
2012-10-29 04:29:39	4.18	6.57		0.501713	-4.26096	-6.69725	2012-10-29 04:29:39
2012-10-29 04:39:39	4.21	6.59		0.508657	-4.29154	-6.71764
2012-10-29 04:49:39	4.17	6.56		0.515602	-4.25076	-6.68705
2012-10-29 04:59:39	4.21	6.59		0.522546	-4.29154	-6.71764
2012-10-29 05:09:39	4.19	6.57		0.529491	-4.27115	-6.69725
2012-10-29 05:19:39	4.23	6.61		0.536435	-4.31193	-6.73802
2012-10-29 05:29:39	4.26	6.65		0.54338	-4.34251	-6.7788	2012-10-29 05:29:39
2012-10-29 05:39:39	4.3	6.68		0.550324	-4.38328	-6.80938
2012-10-29 05:49:39	4.33	6.71		0.557269	-4.41386	-6.83996
2012-10-29 05:59:39	4.36	6.73		0.564213	-4.44444	-6.86035
2012-10-29 06:09:39	4.37	6.75		0.571157	-4.45464	-6.88073
2012-10-29 06:19:39	4.38	6.75		0.578102	-4.46483	-6.88073
2012-10-29 06:29:39	4.41	6.79		0.585046	-4.49541	-6.92151	2012-10-29 06:29:39
2012-10-29 06:39:39	4.42	6.8		0.591991	-4.50561	-6.9317
2012-10-29 06:49:39	4.34	6.69		0.598935	-4.42406	-6.81957
2012-10-29 06:59:39	4.4	6.78		0.60588	-4.48522	-6.91131
2012-10-29 07:09:39	4.44	6.82		0.612824	-4.52599	-6.95209
2012-10-29 07:19:39	4.4	6.78		0.619769	-4.48522	-6.91131
2012-10-29 07:29:39	4.44	6.82		0.626713	-4.52599	-6.95209	2012-10-29 07:29:39
2012-10-29 07:39:39	4.34	6.72		0.633657	-4.42406	-6.85015
2012-10-29 07:49:39	4.26	6.65		0.640602	-4.34251	-6.7788
2012-10-29 07:59:39	4.29	6.69		0.647546	-4.37309	-6.81957
2012-10-29 08:09:39	4.32	6.71		0.654491	-4.40367	-6.83996
2012-10-29 08:19:39	4.35	6.75		0.661435	-4.43425	-6.88073
2012-10-29 08:29:39	4.39	6.78		0.66838	-4.47503	-6.91131	2012-10-29 08:29:39
2012-10-29 08:39:39	4.41	6.81		0.675324	-4.49541	-6.9419
2012-10-29 08:49:39	4.45	6.85		0.682269	-4.53619	-6.98267
2012-10-29 08:59:39	4.51	6.9		0.689213	-4.59735	-7.03364
2012-10-29 09:09:39	4.52	6.92		0.696157	-4.60754	-7.05403
2012-10-29 09:19:39	4.6	6.99		0.703102	-4.68909	-7.12538
2012-10-29 09:29:39	4.57	6.96		0.710046	-4.65851	-7.0948	2012-10-29 09:29:39
2012-10-29 09:39:39	4.65	7.04		0.716991	-4.74006	-7.17635
2012-10-29 09:49:39	4.7	7.09		0.723935	-4.79103	-7.22732
2012-10-29 09:59:39	4.19	6.57		0.73088	-4.27115	-6.69725
2012-10-29 10:09:39	4.25	6.64		0.737824	-4.33231	-6.7686
2012-10-29 10:19:39	4.29	6.68		0.744769	-4.37309	-6.80938
2012-10-29 10:29:39	4.35	6.75		0.751713	-4.43425	-6.88073	2012-10-29 10:29:39
2012-10-29 10:39:39	4.4	6.79		0.758657	-4.48522	-6.92151
2012-10-29 10:49:39	4.47	6.86		0.765602	-4.55657	-6.99286
2012-10-29 10:59:39	4.5	6.89		0.772546	-4.58716	-7.02345
2012-10-29 11:09:39	4.57	6.96		0.779491	-4.65851	-7.0948
2012-10-29 11:19:39	4.65	7.04		0.786435	-4.74006	-7.17635
2012-10-29 11:29:39	4.7	7.09		0.79338	-4.79103	-7.22732	2012-10-29 11:29:39
2012-10-29 11:39:39	4.77	7.15		0.800324	-4.86239	-7.28848
2012-10-29 11:49:39	4.79	7.17		0.807269	-4.88277	-7.30887
2012-10-29 11:59:39	4.83	7.22		0.814213	-4.92355	-7.35984
2012-10-29 12:09:39	4.91	7.3		0.821157	-5.0051	-7.44139
2012-10-29 12:19:39	4.8	7.19		0.828102	-4.89297	-7.32926
2012-10-29 12:29:39	4.9	7.28		0.835046	-4.9949	-7.421	2012-10-29 12:29:39
2012-10-29 12:39:39	4.96	7.34		0.841991	-5.05607	-7.48216
2012-10-29 12:49:39	5.04	7.42		0.848935	-5.13761	-7.56371
2012-10-29 12:59:39	5.07	7.46		0.85588	-5.1682	-7.60449
2012-10-29 13:09:39	5.13	7.51		0.862824	-5.22936	-7.65545
2012-10-29 13:19:39	5.16	7.53		0.869769	-5.25994	-7.67584
2012-10-29 13:29:39	5.18	7.56		0.876713	-5.28033	-7.70642	2012-10-29 13:29:39
2012-10-29 13:39:39	5.24	7.61		0.883657	-5.34149	-7.75739
2012-10-29 13:49:39	5.3	7.65		0.890602	-5.40265	-7.79817
2012-10-29 13:59:39	5.3	7.66		0.897546	-5.40265	-7.80836
2012-10-29 14:09:39	5.35	7.72		0.904491	-5.45362	-7.86952
2012-10-29 14:19:39	5.4	7.78		0.911435	-5.50459	-7.93068
2012-10-29 14:29:39	5.36	7.74		0.91838	-5.46381	-7.88991	2012-10-29 14:29:39
2012-10-29 14:39:39	5.27	7.66		0.925324	-5.37207	-7.80836
2012-10-29 14:49:39	5.41	7.8		0.932269	-5.51478	-7.95107
2012-10-29 14:59:39	5.47	7.84		0.939213	-5.57594	-7.99185
2012-10-29 15:09:39	5.53	7.91		0.946157	-5.6371	-8.0632
2012-10-29 15:19:39	5.55	7.93		0.953102	-5.65749	-8.08359
2012-10-29 15:29:39	5.58	7.97		0.960046	-5.68807	-8.12436	2012-10-29 15:29:39
2012-10-29 15:39:39	5.61	8.01		0.966991	-5.71865	-8.16514
2012-10-29 15:49:39	5.65	8.04		0.973935	-5.75943	-8.19572
2012-10-29 15:59:39	5.41	7.79		0.98088	-5.51478	-7.94088
2012-10-29 16:09:39	5.55	7.94		0.987824	-5.65749	-8.09378
2012-10-29 16:19:39	5.71	8.07		0.994769	-5.82059	-8.2263
2012-10-29 16:29:39	5.67	8.02		1.00171	-5.77982	-8.17533	2012-10-29 16:29:39
2012-10-29 16:39:39	5.77	8.13		1.00866	-5.88175	-8.28746
2012-10-29 16:49:39	5.77	8.14		1.0156	-5.88175	-8.29766
2012-10-29 16:59:39	5.76	8.13		1.02255	-5.87156	-8.28746
2012-10-29 17:09:39	5.61	7.98		1.02949	-5.71865	-8.13456
2012-10-29 17:19:39	5.72	8.08		1.03644	-5.83078	-8.23649
2012-10-29 17:29:39	5.78	8.15		1.04338	-5.89195	-8.30785	2012-10-29 17:29:39
2012-10-29 17:39:39	5.8	8.18		1.05032	-5.91233	-8.33843
2012-10-29 17:49:39	5.83	8.21		1.05727	-5.94292	-8.36901
2012-10-29 17:59:39	5.55	7.93		1.06421	-5.65749	-8.08359
2012-10-29 18:09:39	5.66	8.04		1.07116	-5.76962	-8.19572
2012-10-29 18:19:39	5.76	8.14		1.0781	-5.87156	-8.29766
2012-10-29 18:29:39	5.85	8.23		1.08505	-5.9633	-8.3894	2012-10-29 18:29:39
2012-10-29 18:39:39	5.37	7.76		1.09199	-5.47401	-7.9103
2012-10-29 18:49:39	5.47	7.86		1.09894	-5.57594	-8.01223
2012-10-29 18:59:39	5.44	7.82		1.10588	-5.54536	-7.97146
2012-10-29 19:09:39	5.41	7.79		1.11282	-5.51478	-7.94088
2012-10-29 19:19:39	5.48	7.86		1.11977	-5.58614	-8.01223
2012-10-29 19:29:39	5.47	7.85		1.12671	-5.57594	-8.00204	2012-10-29 19:29:39
2012-10-29 19:39:39	5.48	7.86		1.13366	-5.58614	-8.01223
2012-10-29 19:49:39	5.26	7.64		1.1406	-5.36188	-7.78797
2012-10-29 19:59:39	5.1	7.48		1.14755	-5.19878	-7.62487
2012-10-29 20:09:39	5.16	7.55		1.15449	-5.25994	-7.69623
2012-10-29 20:19:39	5.25	7.64		1.16144	-5.35168	-7.78797
2012-10-29 20:29:39	5.31	7.67		1.16838	-5.41284	-7.81855	2012-10-29 20:29:39
2012-10-29 20:39:39	5.37	7.75		1.17532	-5.47401	-7.9001
2012-10-29 20:49:39	5.44	7.82		1.18227	-5.54536	-7.97146
2012-10-29 20:59:39	5.52	7.9		1.18921	-5.62691	-8.05301
2012-10-29 21:09:39	5.61	7.97		1.19616	-5.71865	-8.12436
2012-10-29 21:19:39	5.7	8.06		1.2031	-5.8104	-8.21611
2012-10-29 21:29:39	5.76	8.12		1.21005	-5.87156	-8.27727	2012-10-29 21:29:39
2012-10-29 21:39:39	5.84	8.2		1.21699	-5.95311	-8.35882
2012-10-29 21:49:39	5.9	8.28		1.22394	-6.01427	-8.44037
2012-10-29 21:59:39	5.86	8.25		1.23088	-5.9735	-8.40979
2012-10-29 22:09:39	5.94	8.3		1.23782	-6.05505	-8.46075
2012-10-29 22:19:39	5.91	8.29		1.24477	-6.02446	-8.45056
2012-10-29 22:29:39	5.98	8.35		1.25171	-6.09582	-8.51172	2012-10-29 22:29:39
2012-10-29 22:39:39	5.99	8.36		1.25866	-6.10601	-8.52192
2012-10-29 22:49:39	6.04	8.41		1.2656	-6.15698	-8.57288
2012-10-29 22:59:39	6.08	8.44		1.27255	-6.19776	-8.60347
2012-10-29 23:09:39	6.11	8.47		1.27949	-6.22834	-8.63405
2012-10-29 23:19:39	6.15	8.5		1.28644	-6.26911	-8.66463
2012-10-29 23:29:39	6.16	8.52		1.29338	-6.27931	-8.68502	2012-10-29 23:29:39
2012-10-29 23:39:39	6.2	8.56		1.30032	-6.32008	-8.72579
2012-10-29 23:49:39	5.98	8.36		1.30727	-6.09582	-8.52192
2012-10-29 23:59:39	5.95	8.32		1.31421	-6.06524	-8.48114
2012-10-30 00:09:39	6.03	8.4		1.32116	-6.14679	-8.56269
2012-10-30 00:19:39	6.1	8.46		1.3281	-6.21814	-8.62385
2012-10-30 00:29:39	6.18	8.54		1.33505	-6.29969	-8.7054	2012-10-30 00:29:39
2012-10-30 00:39:39	6.22	8.59		1.34199	-6.34047	-8.75637
2012-10-30 00:49:39	6.25	8.62		1.34894	-6.37105	-8.78695
2012-10-30 00:59:39	6.17	8.55		1.35588	-6.2895	-8.7156
2012-10-30 01:09:39	6.25	8.62		1.36282	-6.37105	-8.78695
2012-10-30 01:19:39	6.3	8.69		1.36977	-6.42202	-8.85831
2012-10-30 01:29:39	6.37	8.74		1.37671	-6.49337	-8.90928	2012-10-30 01:29:39
2012-10-30 01:39:39	6.39	8.77		1.38366	-6.51376	-8.93986
2012-10-30 01:49:39	6.41	8.78		1.3906	-6.53415	-8.95005
2012-10-30 01:59:39	6.4	8.77		1.39755	-6.52396	-8.93986
2012-10-30 02:09:39	6.48	8.84		1.40449	-6.6055	-9.01121
2012-10-30 02:19:39	6.45	8.82		1.41144	-6.57492	-8.99083
2012-10-30 02:29:39	6.48	8.86		1.41838	-6.6055	-9.0316	2012-10-30 02:29:39
2012-10-30 02:39:39	6.5	8.89		1.42532	-6.62589	-9.06218
2012-10-30 02:49:39	6.37	8.77		1.43227	-6.49337	-8.93986
2012-10-30 02:59:39	6.48	8.86		1.43921	-6.6055	-9.0316
2012-10-30 03:09:39	6.53	8.92		1.44616	-6.65647	-9.09276
2012-10-30 03:19:39	6.51	8.96		1.4531	-6.63609	-9.13354
2012-10-30 03:29:39	6.57	8.96		1.46005	-6.69725	-9.13354	2012-10-30 03:29:39
2012-10-30 03:39:39	6.63	9		1.46699	-6.75841	-9.17431
2012-10-30 03:49:39	6.63	9.01		1.47394	-6.75841	-9.18451
2012-10-30 03:59:39	6.66	9.03		1.48088	-6.78899	-9.20489
2012-10-30 04:09:39	6.69	9.07		1.48782	-6.81957	-9.24567
2012-10-30 04:19:39	6.74	9.11		1.49477	-6.87054	-9.28644
2012-10-30 04:29:39	6.76	9.14		1.50171	-6.89093	-9.31702	2012-10-30 04:29:39
2012-10-30 04:39:39	6.77	9.16		1.50866	-6.90112	-9.33741
2012-10-30 04:49:39	6.84	9.22		1.5156	-6.97248	-9.39857
2012-10-30 04:59:39	6.76	9.13		1.52255	-6.89093	-9.30683
2012-10-30 05:09:39	6.87	9.24		1.52949	-7.00306	-9.41896
2012-10-30 05:19:39	6.88	9.27		1.53644	-7.01325	-9.44954
2012-10-30 05:29:39	6.86	9.25		1.54338	-6.99286	-9.42915	2012-10-30 05:29:39
2012-10-30 05:39:39	6.92	9.31		1.55032	-7.05403	-9.49032
2012-10-30 05:49:39	6.91	9.31		1.55727	-7.04383	-9.49032
2012-10-30 05:59:39	6.99	9.34		1.56421	-7.12538	-9.5209
2012-10-30 06:09:39	7.01	9.37		1.57116	-7.14577	-9.55148
2012-10-30 06:19:39	7.03	9.41		1.5781	-7.16616	-9.59225
2012-10-30 06:29:39	7.04	9.42		1.58505	-7.17635	-9.60245	2012-10-30 06:29:39
2012-10-30 06:39:39	7.05	9.42		1.59199	-7.18654	-9.60245
2012-10-30 06:49:39	7.08	9.43		1.59894	-7.21713	-9.61264
2012-10-30 06:59:39	7.1	9.47		1.60588	-7.23751	-9.65341
2012-10-30 07:09:39	7.14	9.51		1.61282	-7.27829	-9.69419
2012-10-30 07:19:39	7.14	9.52		1.61977	-7.27829	-9.70438
2012-10-30 07:29:39	7.08	9.45		1.62671	-7.21713	-9.63303	2012-10-30 07:29:39
2012-10-30 07:39:39	7.14	9.52		1.63366	-7.27829	-9.70438
2012-10-30 07:49:39	7.21	9.59		1.6406	-7.34964	-9.77574
2012-10-30 07:59:39	6.94	9.32		1.64755	-7.07441	-9.50051
2012-10-30 08:09:39	7.05	9.42		1.65449	-7.18654	-9.60245
2012-10-30 08:19:39	7.13	9.51		1.66144	-7.26809	-9.69419
2012-10-30 08:29:39	7.22	9.6		1.66838	-7.35984	-9.78593	2012-10-30 08:29:39
2012-10-30 08:39:39	7.28	9.65		1.67532	-7.421	-9.8369
2012-10-30 08:49:39	7.3	9.68		1.68227	-7.44139	-9.86748
2012-10-30 08:59:39	7.31	9.68		1.68921	-7.45158	-9.86748
2012-10-30 09:09:39	7.38	9.76		1.69616	-7.52294	-9.94903
2012-10-30 09:19:39	7.17	9.54		1.7031	-7.30887	-9.72477
2012-10-30 09:29:39	7.26	9.63		1.71005	-7.40061	-9.81651	2012-10-30 09:29:39
2012-10-30 09:39:39	7.22	9.6		1.71699	-7.35984	-9.78593
2012-10-30 09:49:39	7.29	9.67		1.72394	-7.43119	-9.85729
2012-10-30 09:59:39	7.37	9.74		1.73088	-7.51274	-9.92864
2012-10-30 10:09:39	7.34	9.73		1.73782	-7.48216	-9.91845
2012-10-30 10:19:39	7.4	9.77		1.74477	-7.54332	-9.95923
2012-10-30 10:29:39	7.44	9.81		1.75171	-7.5841	-10	2012-10-30 10:29:39
2012-10-30 10:39:39	7.47	9.83		1.75866	-7.61468	-10.0204
2012-10-30 10:49:39	7.51	9.87		1.7656	-7.65545	-10.0612
2012-10-30 10:59:39	7.54	9.91		1.77255	-7.68603	-10.1019
2012-10-30 11:09:39	7.57	9.95		1.77949	-7.71662	-10.1427
2012-10-30 11:19:39	7.59	9.94		1.78644	-7.737	-10.1325
2012-10-30 11:29:39	7.63	10.01		1.79338	-7.77778	-10.2039	2012-10-30 11:29:39
2012-10-30 11:39:39	7.66	10.04		1.80032	-7.80836	-10.2345
2012-10-30 11:49:39	7.67	10.04		1.80727	-7.81855	-10.2345
2012-10-30 11:59:39	7.66	10.03		1.81421	-7.80836	-10.2243
2012-10-30 12:09:39	7.71	10.07		1.82116	-7.85933	-10.265
2012-10-30 12:19:39	7.71	10.08		1.8281	-7.85933	-10.2752
2012-10-30 12:29:39	7.75	10.11		1.83505	-7.9001	-10.3058	2012-10-30 12:29:39
2012-10-30 12:39:39	7.79	10.16		1.84199	-7.94088	-10.3568
2012-10-30 12:49:39	7.83	10.18		1.84894	-7.98165	-10.3772
2012-10-30 12:59:39	7.82	10.2		1.85588	-7.97146	-10.3976
2012-10-30 13:09:39	7.83	10.19		1.86282	-7.98165	-10.3874
2012-10-30 13:19:39	7.86	10.22		1.86977	-8.01223	-10.4179
2012-10-30 13:29:39	7.69	10.06		1.87671	-7.83894	-10.2548	2012-10-30 13:29:39
2012-10-30 13:39:39	7.78	10.15		1.88366	-7.93068	-10.3466
2012-10-30 13:49:39	7.58	9.94		1.8906	-7.72681	-10.1325
2012-10-30 13:59:39	7.68	10.04		1.89755	-7.82875	-10.2345
2012-10-30 14:09:39	7.77	10.14		1.90449	-7.92049	-10.3364
2012-10-30 14:19:39	7.83	10.21		1.91144	-7.98165	-10.4077
2012-10-30 14:29:39	7.89	10.27		1.91838	-8.04281	-10.4689	2012-10-30 14:29:39
2012-10-30 14:39:39	7.96	10.3		1.92532	-8.11417	-10.4995
2012-10-30 14:49:39	7.98	10.32		1.93227	-8.13456	-10.5199
2012-10-30 14:59:39	7.95	10.32		1.93921	-8.10398	-10.5199
2012-10-30 15:09:39	8	10.37		1.94616	-8.15494	-10.5708
2012-10-30 15:19:39	8.04	10.41		1.9531	-8.19572	-10.6116
2012-10-30 15:29:39	8.02	10.37		1.96005	-8.17533	-10.5708	2012-10-30 15:29:39
2012-10-30 15:39:39	8.05	10.39		1.96699	-8.20591	-10.5912
2012-10-30 15:49:39	8.07	10.42		1.97394	-8.2263	-10.6218
2012-10-30 15:59:39	8.1	10.45		1.98088	-8.25688	-10.6524
2012-10-30 16:09:39	8.13	10.49		1.98782	-8.28746	-10.6932
2012-10-30 16:19:39	8.18	10.52		1.99477	-8.33843	-10.7238
2012-10-30 16:29:39	8.19	10.55		2.00171	-8.34862	-10.7543	2012-10-30 16:29:39
2012-10-30 16:39:39	8.25	10.59		2.00866	-8.40979	-10.7951
2012-10-30 16:49:39	8.25	10.59		2.0156	-8.40979	-10.7951
2012-10-30 16:59:39	8.27	10.61		2.02255	-8.43017	-10.8155
2012-10-30 17:09:39	8.3	10.66		2.02949	-8.46075	-10.8665
2012-10-30 17:19:39	8.33	10.69		2.03644	-8.49134	-10.897
2012-10-30 17:29:39	8.39	10.74		2.04338	-8.5525	-10.948	2012-10-30 17:29:39
2012-10-30 17:39:39	8.32	10.68		2.05032	-8.48114	-10.8869
2012-10-30 17:49:39	8.28	10.61		2.05727	-8.44037	-10.8155
2012-10-30 17:59:39	8.37	10.72		2.06421	-8.53211	-10.9276
2012-10-30 18:09:39	8.44	10.77		2.07116	-8.60347	-10.9786
2012-10-30 18:19:39	8.49	10.8		2.0781	-8.65443	-11.0092
2012-10-30 18:29:39	8.47	10.81		2.08505	-8.63405	-11.0194	2012-10-30 18:29:39
2012-10-30 18:39:39	8.54	10.88		2.09199	-8.7054	-11.0907
2012-10-30 18:49:39	8.55	10.89		2.09894	-8.7156	-11.1009
2012-10-30 18:59:39	8.6	10.93		2.10588	-8.76656	-11.1417
2012-10-30 19:09:39	8.64	10.95		2.11282	-8.80734	-11.1621
2012-10-30 19:19:39	8.61	10.95		2.11977	-8.77676	-11.1621
2012-10-30 19:29:39	8.65	10.98		2.12671	-8.81753	-11.1927	2012-10-30 19:29:39
2012-10-30 19:39:39	8.67	11.01		2.13366	-8.83792	-11.2232
2012-10-30 19:49:39	8.72	11.05		2.1406	-8.88889	-11.264
2012-10-30 19:59:39	8.76	11.09		2.14755	-8.92966	-11.3048
2012-10-30 20:09:39	8.79	11.12		2.15449	-8.96024	-11.3354
2012-10-30 20:19:39	8.81	11.14		2.16144	-8.98063	-11.3558
2012-10-30 20:29:39	8.82	11.15		2.16838	-8.99083	-11.366	2012-10-30 20:29:39
2012-10-30 20:39:39	8.41	10.72		2.17532	-8.57288	-10.9276
2012-10-30 20:49:39	8.52	10.83		2.18227	-8.68502	-11.0398
2012-10-30 20:59:39	8.6	10.91		2.18921	-8.76656	-11.1213
2012-10-30 21:09:39	8.51	10.82		2.19616	-8.67482	-11.0296
2012-10-30 21:19:39	8.63	10.94		2.2031	-8.79715	-11.1519
2012-10-30 21:29:39	8.72	11.03		2.21005	-8.88889	-11.2436	2012-10-30 21:29:39
2012-10-30 21:39:39	8.8	11.11		2.21699	-8.97044	-11.3252
2012-10-30 21:49:39	8.88	11.18		2.22394	-9.05199	-11.3965
2012-10-30 21:59:39	8.87	11.17		2.23088	-9.04179	-11.3863
2012-10-30 22:09:39	8.93	11.23		2.23782	-9.10296	-11.4475
2012-10-30 22:19:39	8.97	11.27		2.24477	-9.14373	-11.4883
2012-10-30 22:29:39	9.01	11.31		2.25171	-9.18451	-11.5291	2012-10-30 22:29:39
2012-10-30 22:39:39	8.93	11.23		2.25866	-9.10296	-11.4475
2012-10-30 22:49:39	9.03	11.34		2.2656	-9.20489	-11.5596
2012-10-30 22:59:39	9.08	11.38		2.27255	-9.25586	-11.6004
2012-10-30 23:09:39	9.12	11.43		2.27949	-9.29664	-11.6514
2012-10-30 23:19:39	9.17	11.46		2.28644	-9.3476	-11.682
2012-10-30 23:29:39	9.19	11.49		2.29338	-9.36799	-11.7125	2012-10-30 23:29:39
2012-10-30 23:39:39	9.23	11.53		2.30032	-9.40877	-11.7533
2012-10-30 23:49:39	9.27	11.56		2.30727	-9.44954	-11.7839
2012-10-30 23:59:39	9.31	11.61		2.31421	-9.49032	-11.8349
2012-10-31 00:09:39	9.34	11.65		2.32116	-9.5209	-11.8756
2012-10-31 00:19:39	9.36	11.65		2.3281	-9.54128	-11.8756
2012-10-31 00:29:39	9.39	11.68		2.33505	-9.57187	-11.9062	2012-10-31 00:29:39
2012-10-31 00:39:39	9.28	11.58		2.34199	-9.45973	-11.8043
2012-10-31 00:49:39	9.41	11.68		2.34894	-9.59225	-11.9062
2012-10-31 00:59:39	9.42	11.73		2.35588	-9.60245	-11.9572
2012-10-31 01:09:39	9.49	11.79		2.36282	-9.6738	-12.0183
2012-10-31 01:19:39	9.47	11.77		2.36977	-9.65341	-11.998
2012-10-31 01:29:39	9.53	11.83		2.37671	-9.71458	-12.0591	2012-10-31 01:29:39
2012-10-31 01:39:39	9.53	11.83		2.38366	-9.71458	-12.0591
2012-10-31 01:49:39	9.56	11.85		2.3906	-9.74516	-12.0795
2012-10-31 01:59:39	9.57	11.87		2.39755	-9.75535	-12.0999
2012-10-31 02:09:39	9.59	11.88		2.40449	-9.77574	-12.1101
2012-10-31 02:19:39	9.65	11.94		2.41144	-9.8369	-12.1713
2012-10-31 02:29:39	9.68	11.96		2.41838	-9.86748	-12.1916	2012-10-31 02:29:39
2012-10-31 02:39:39	9.55	11.84		2.42532	-9.73496	-12.0693
2012-10-31 02:49:39	9.63	11.92		2.43227	-9.81651	-12.1509
2012-10-31 02:59:39	9.7	12		2.43921	-9.88787	-12.2324
2012-10-31 03:09:39	9.72	12.01		2.44616	-9.90826	-12.2426
2012-10-31 03:19:39	9.76	12.05		2.4531	-9.94903	-12.2834
2012-10-31 03:29:39	9.8	12.09		2.46005	-9.98981	-12.3242	2012-10-31 03:29:39
2012-10-31 03:39:39	9.76	12.05		2.46699	-9.94903	-12.2834
2012-10-31 03:49:39	9.82	12.11		2.47394	-10.0102	-12.3445
2012-10-31 03:59:39	9.83	12.12		2.48088	-10.0204	-12.3547
2012-10-31 04:09:39	9.88	12.17		2.48782	-10.0714	-12.4057
2012-10-31 04:19:39	9.93	12.23		2.49477	-10.1223	-12.4669
2012-10-31 04:29:39	9.96	12.25		2.50171	-10.1529	-12.4873	2012-10-31 04:29:39
2012-10-31 04:39:39	9.98	12.28		2.50866	-10.1733	-12.5178
2012-10-31 04:49:39	10.03	12.32		2.5156	-10.2243	-12.5586
2012-10-31 04:59:39	10.07	12.36		2.52255	-10.265	-12.5994
2012-10-31 05:09:39	10.08	12.38		2.52949	-10.2752	-12.6198
2012-10-31 05:19:39	10.1	12.39		2.53644	-10.2956	-12.63
2012-10-31 05:29:39	10.13	12.43		2.54338	-10.3262	-12.6707	2012-10-31 05:29:39
2012-10-31 05:39:39	10.17	12.45		2.55032	-10.367	-12.6911
2012-10-31 05:49:39	10.14	12.49		2.55727	-10.3364	-12.7319
2012-10-31 05:59:39	10.21	12.5		2.56421	-10.4077	-12.7421
2012-10-31 06:09:39	10.26	12.55		2.57116	-10.4587	-12.7931
2012-10-31 06:19:39	10.29	12.58		2.5781	-10.4893	-12.8236
2012-10-31 06:29:39	10.33	12.62		2.58505	-10.5301	-12.8644	2012-10-31 06:29:39
2012-10-31 06:39:39	10.39	12.68		2.59199	-10.5912	-12.9256
2012-10-31 06:49:39	10.4	12.69		2.59894	-10.6014	-12.9358
2012-10-31 06:59:39	10.43	12.72		2.60588	-10.632	-12.9664
2012-10-31 07:09:39	10.46	12.73		2.61282	-10.6626	-12.9766
2012-10-31 07:19:39	10.49	12.78		2.61977	-10.6932	-13.0275
2012-10-31 07:29:39	10.46	12.75		2.62671	-10.6626	-12.9969	2012-10-31 07:29:39
2012-10-31 07:39:39	10.52	12.81		2.63366	-10.7238	-13.0581
2012-10-31 07:49:39	10.57	12.86		2.6406	-10.7747	-13.1091
2012-10-31 07:59:39	10.61	12.9		2.64755	-10.8155	-13.1498
2012-10-31 08:09:39	10.66	12.94		2.65449	-10.8665	-13.1906
2012-10-31 08:19:39	10.62	12.92		2.66144	-10.8257	-13.1702
2012-10-31 08:29:39	10.67	12.96		2.66838	-10.8767	-13.211	2012-10-31 08:29:39
2012-10-31 08:39:39	10.7	12.98		2.67532	-10.9072	-13.2314
2012-10-31 08:49:39	10.45	12.72		2.68227	-10.6524	-12.9664
2012-10-31 08:59:39	10.58	12.88		2.68921	-10.7849	-13.1295
2012-10-31 09:09:39	10.67	12.97		2.69616	-10.8767	-13.2212
2012-10-31 09:19:39	10.72	13.01		2.7031	-10.9276	-13.262
2012-10-31 09:29:39	10.75	13.05		2.71005	-10.9582	-13.3028	2012-10-31 09:29:39
2012-10-31 09:39:39	10.78	13.09		2.71699	-10.9888	-13.3435
2012-10-31 09:49:39	10.83	13.13		2.72394	-11.0398	-13.3843
2012-10-31 09:59:39	10.88	13.18		2.73088	-11.0907	-13.4353
2012-10-31 10:09:39	10.89	13.18		2.73782	-11.1009	-13.4353
2012-10-31 10:19:39	10.92	13.2		2.74477	-11.1315	-13.4557
2012-10-31 10:29:39	10.95	13.24		2.75171	-11.1621	-13.4964	2012-10-31 10:29:39
2012-10-31 10:39:39	10.99	13.27		2.75866	-11.2029	-13.527
2012-10-31 10:49:39	11	13.28		2.7656	-11.213	-13.5372
2012-10-31 10:59:39	11.02	13.3		2.77255	-11.2334	-13.5576
2012-10-31 11:09:39	11.04	13.34		2.77949	-11.2538	-13.5984
2012-10-31 11:19:39	11.07	13.35		2.78644	-11.2844	-13.6086
2012-10-31 11:29:39	11.12	13.4		2.79338	-11.3354	-13.6595	2012-10-31 11:29:39
2012-10-31 11:39:39	8.15	10.46		2.80032	-8.30785	-10.6626
2012-10-31 11:49:39	8.22	10.52		2.80727	-8.3792	-10.7238
2012-10-31 11:59:39	8.35	10.64		2.81421	-8.51172	-10.8461
2012-10-31 12:09:39	8.47	10.74		2.82116	-8.63405	-10.948
2012-10-31 12:19:39	8.58	10.85		2.8281	-8.74618	-11.0601
2012-10-31 12:29:39	8.69	10.95		2.83505	-8.85831	-11.1621	2012-10-31 12:29:39
2012-10-31 12:39:39	8.79	11.05		2.84199	-8.96024	-11.264
2012-10-31 12:49:39	8.9	11.15		2.84894	-9.07238	-11.366
2012-10-31 12:59:39	9	11.27		2.85588	-9.17431	-11.4883
2012-10-31 13:09:39	9.09	11.36		2.86282	-9.26606	-11.58
2012-10-31 13:19:39	9.19	11.46		2.86977	-9.36799	-11.682
2012-10-31 13:29:39	9.28	11.54		2.87671	-9.45973	-11.7635	2012-10-31 13:29:39
2012-10-31 13:39:39	9.37	11.64		2.88366	-9.55148	-11.8654
2012-10-31 13:49:39	9.45	11.73		2.8906	-9.63303	-11.9572
2012-10-31 13:59:39	9.56	11.82		2.89755	-9.74516	-12.0489
2012-10-31 14:09:39	9.64	11.91		2.90449	-9.82671	-12.1407
2012-10-31 14:19:39	9.72	12		2.91144	-9.90826	-12.2324
2012-10-31 14:29:39	9.82	12.09		2.91838	-10.0102	-12.3242	2012-10-31 14:29:39
2012-10-31 14:39:39	9.9	12.18		2.92532	-10.0917	-12.4159
2012-10-31 14:49:39	10	12.27		2.93227	-10.1937	-12.5076
2012-10-31 14:59:39	10.12	12.35		2.93921	-10.316	-12.5892
2012-10-31 15:09:39	10.16	12.44		2.94616	-10.3568	-12.6809
2012-10-31 15:19:39	10.26	12.52		2.9531	-10.4587	-12.7625
2012-10-31 15:29:39	10.36	12.61		2.96005	-10.5607	-12.8542	2012-10-31 15:29:39
2012-10-31 15:39:39	10.42	12.69		2.96699	-10.6218	-12.9358
2012-10-31 15:49:39	10.51	12.76		2.97394	-10.7136	-13.0071
2012-10-31 15:59:39	10.6	12.86		2.98088	-10.8053	-13.1091
2012-10-31 16:09:39	10.68	12.94		2.98782	-10.8869	-13.1906
2012-10-31 16:19:39	10.78	13.02		2.99477	-10.9888	-13.2722
2012-10-31 16:29:39	10.88	13.11		3.00171	-11.0907	-13.3639	2012-10-31 16:29:39
2012-10-31 16:39:39	10.95	13.19		3.00866	-11.1621	-13.4455
2012-10-31 16:49:39	11.04	13.28		3.0156	-11.2538	-13.5372
2012-10-31 16:59:39	11.13	13.37		3.02255	-11.3456	-13.629
2012-10-31 17:09:39	10.38	12.61		3.02949	-10.581	-12.8542
2012-10-31 17:19:39	10.54	12.78		3.03644	-10.7441	-13.0275
2012-10-31 17:29:39	10.62	12.86		3.04338	-10.8257	-13.1091	2012-10-31 17:29:39
2012-10-31 17:39:39	10.81	13		3.05032	-11.0194	-13.2518
2012-10-31 17:49:39	10.9	13.11		3.05727	-11.1111	-13.3639
2012-10-31 17:59:39	11.03	13.26		3.06421	-11.2436	-13.5168
2012-10-31 18:09:39	11.17	13.38		3.07116	-11.3863	-13.6391
2012-10-31 18:19:39	11.26	13.49		3.0781	-11.4781	-13.7513
2012-10-31 18:29:39	11.33	13.55		3.08505	-11.5494	-13.8124	2012-10-31 18:29:39
2012-10-31 18:39:39	11.42	13.65		3.09199	-11.6412	-13.9144
2012-10-31 18:49:39	11.49	13.72		3.09894	-11.7125	-13.9857
2012-10-31 18:59:39	11.58	13.8		3.10588	-11.8043	-14.0673
2012-10-31 19:09:39	11.61	13.84		3.11282	-11.8349	-14.1081
2012-10-31 19:19:39	11.59	13.8		3.11977	-11.8145	-14.0673
2012-10-31 19:29:39	11.72	13.94		3.12671	-11.947	-14.21	2012-10-31 19:29:39
2012-10-31 19:39:39	11.77	14		3.13366	-11.998	-14.2712
2012-10-31 19:49:39	11.84	14.06		3.1406	-12.0693	-14.3323
2012-10-31 19:59:39	11.9	14.13		3.14755	-12.1305	-14.4037
2012-10-31 20:09:39	11.94	14.16		3.15449	-12.1713	-14.4343
2012-10-31 20:19:39	11.99	14.21		3.16144	-12.2222	-14.4852
2012-10-31 20:29:39	12.06	14.28		3.16838	-12.2936	-14.5566	2012-10-31 20:29:39
2012-10-31 20:39:39	12.1	14.33		3.17532	-12.3344	-14.6075
2012-10-31 20:49:39	12.15	14.38		3.18227	-12.3853	-14.6585
2012-10-31 20:59:39	12.22	14.44		3.18921	-12.4567	-14.7197
2012-10-31 21:09:39	12.3	14.52		3.19616	-12.5382	-14.8012
2012-10-31 21:19:39	12.34	14.56		3.2031	-12.579	-14.842
2012-10-31 21:29:39	12.37	14.57		3.21005	-12.6096	-14.8522	2012-10-31 21:29:39
2012-10-31 21:39:39	12.43	14.64		3.21699	-12.6707	-14.9235
2012-10-31 21:49:39	12.48	14.7		3.22394	-12.7217	-14.9847
2012-10-31 21:59:39	12.49	14.71		3.23088	-12.7319	-14.9949
2012-10-31 22:09:39	12.56	14.78		3.23782	-12.8033	-15.0663
2012-10-31 22:19:39	12.5	14.72		3.24477	-12.7421	-15.0051
2012-10-31 22:29:39	12.63	14.85		3.25171	-12.8746	-15.1376	2012-10-31 22:29:39
2012-10-31 22:39:39	12.68	14.9		3.25866	-12.9256	-15.1886
2012-10-31 22:49:39	12.69	14.92		3.2656	-12.9358	-15.209
2012-10-31 22:59:39	12.74	14.97		3.27255	-12.9867	-15.2599
2012-10-31 23:09:39	12.77	14.99		3.27949	-13.0173	-15.2803
2012-10-31 23:19:39	12.81	15.02		3.28644	-13.0581	-15.3109
2012-10-31 23:29:39	12.86	15.09		3.29338	-13.1091	-15.3823	2012-10-31 23:29:39
2012-10-31 23:39:39	12.9	15.13		3.30032	-13.1498	-15.423
2012-10-31 23:49:39	12.98	15.19		3.30727	-13.2314	-15.4842
2012-10-31 23:59:39	13	15.22		3.31421	-13.2518	-15.5148
2012-11-01 00:09:39	13.06	15.28		3.32116	-13.3129	-15.5759
2012-11-01 00:19:39	13.09	15.28		3.3281	-13.3435	-15.5759
2012-11-01 00:29:39	13.13	15.33		3.33505	-13.3843	-15.6269	2012-11-01 00:29:39
2012-11-01 00:39:39	13.16	15.37		3.34199	-13.4149	-15.6677
2012-11-01 00:49:39	13.2	15.41		3.34894	-13.4557	-15.7085
2012-11-01 00:59:39	13.25	15.47		3.35588	-13.5066	-15.7696
2012-11-01 01:09:39	13.29	15.51		3.36282	-13.5474	-15.8104
2012-11-01 01:19:39	13.34	15.55		3.36977	-13.5984	-15.8512
2012-11-01 01:29:39	13.4	15.61		3.37671	-13.6595	-15.9123	2012-11-01 01:29:39
2012-11-01 01:39:39	13.43	15.65		3.38366	-13.6901	-15.9531
2012-11-01 01:49:39	13.47	15.68		3.3906	-13.7309	-15.9837
2012-11-01 01:59:39	13.5	15.72		3.39755	-13.7615	-16.0245
2012-11-01 02:09:39	13.36	15.57		3.40449	-13.6188	-15.8716
2012-11-01 02:19:39	13.52	15.72		3.41144	-13.7819	-16.0245
2012-11-01 02:29:39	13.56	15.77		3.41838	-13.8226	-16.0754	2012-11-01 02:29:39
2012-11-01 02:39:39	13.46	15.66		3.42532	-13.7207	-15.9633
2012-11-01 02:49:39	13.6	15.81		3.43227	-13.8634	-16.1162
2012-11-01 02:59:39	13.67	15.88		3.43921	-13.9348	-16.1876
2012-11-01 03:09:39	13.7	15.91		3.44616	-13.9653	-16.2181
2012-11-01 03:19:39	13.76	15.97		3.4531	-14.0265	-16.2793
2012-11-01 03:29:39	13.79	16		3.46005	-14.0571	-16.3099	2012-11-01 03:29:39
2012-11-01 03:39:39	13.85	16.06		3.46699	-14.1182	-16.371
2012-11-01 03:49:39	13.91	16.11		3.47394	-14.1794	-16.422
2012-11-01 03:59:39	13.87	16.07		3.48088	-14.1386	-16.3812
2012-11-01 04:09:39	13.96	16.18		3.48782	-14.2304	-16.4934
2012-11-01 04:19:39	14	16.21		3.49477	-14.2712	-16.524
2012-11-01 04:29:39	14.01	16.21		3.50171	-14.2813	-16.524	2012-11-01 04:29:39
2012-11-01 04:39:39	14.08	16.28		3.50866	-14.3527	-16.5953
2012-11-01 04:49:39	14.13	16.34		3.5156	-14.4037	-16.6565
2012-11-01 04:59:39	14.19	16.4		3.52255	-14.4648	-16.7176
2012-11-01 05:09:39	14.23	16.43		3.52949	-14.5056	-16.7482
2012-11-01 05:19:39	14.26	16.46		3.53644	-14.5362	-16.7788
2012-11-01 05:29:39	14.3	16.49		3.54338	-14.577	-16.8094	2012-11-01 05:29:39
2012-11-01 05:39:39	14.33	16.53		3.55032	-14.6075	-16.8502
2012-11-01 05:49:39	14.39	16.58		3.55727	-14.6687	-16.9011
2012-11-01 05:59:39	14.42	16.63		3.56421	-14.6993	-16.9521
2012-11-01 06:09:39	14.47	16.67		3.57116	-14.7503	-16.9929
2012-11-01 06:19:39	14.53	16.73		3.5781	-14.8114	-17.054
2012-11-01 06:29:39	14.53	16.73		3.58505	-14.8114	-17.054	2012-11-01 06:29:39
2012-11-01 06:39:39	14.56	16.75		3.59199	-14.842	-17.0744
2012-11-01 06:49:39	14.6	16.79		3.59894	-14.8828	-17.1152
2012-11-01 06:59:39	14.61	16.81		3.60588	-14.893	-17.1356
2012-11-01 07:09:39	14.68	16.89		3.61282	-14.9643	-17.2171
2012-11-01 07:19:39	14.7	16.89		3.61977	-14.9847	-17.2171
2012-11-01 07:29:39	14.75	16.94		3.62671	-15.0357	-17.2681	2012-11-01 07:29:39
2012-11-01 07:39:39	14.8	16.99		3.63366	-15.0866	-17.3191
2012-11-01 07:49:39	14.85	17.04		3.6406	-15.1376	-17.37
2012-11-01 07:59:39	13.53	15.7		3.64755	-13.792	-16.0041
2012-11-01 08:09:39	13.67	15.88		3.65449	-13.9348	-16.1876
2012-11-01 08:19:39	13.89	16.1		3.66144	-14.159	-16.4118
2012-11-01 08:29:39	14.05	16.25		3.66838	-14.3221	-16.5647	2012-11-01 08:29:39
2012-11-01 08:49:39	14.23	16.43		3.68227	-14.5056	-16.7482
2012-11-01 08:59:39	14.29	16.49		3.68921	-14.5668	-16.8094
2012-11-01 09:09:39	14.47	16.67		3.69616	-14.7503	-16.9929
2012-11-01 09:19:39	13.96	16.16		3.7031	-14.2304	-16.473
2012-11-01 09:29:39	13.98	16.21		3.71005	-14.2508	-16.524
2012-11-01 09:39:39	14.21	16.4		3.71699	-14.4852	-16.7176	2012-11-01 09:39:39
2012-11-01 09:49:39	14.43	16.63		3.72394	-14.7095	-16.9521
2012-11-01 09:59:39	14.54	16.75		3.73088	-14.8216	-17.0744
2012-11-01 10:09:39	14.7	16.89		3.73782	-14.9847	-17.2171
2012-11-01 10:19:39	14.82	17.01		3.74477	-15.107	-17.3394
2012-11-01 10:29:39	14.9	17.11		3.75171	-15.1886	-17.4414
2012-11-01 10:39:39	14.79	16.99		3.75866	-15.0765	-17.3191	2012-11-01 10:39:39
2012-11-01 10:49:39	14.92	17.13		3.7656	-15.209	-17.4618
2012-11-01 10:59:39	15	17.2		3.77255	-15.2905	-17.5331
2012-11-01 11:09:39	15.07	17.27		3.77949	-15.3619	-17.6045
2012-11-01 11:19:39	15.14	17.34		3.78644	-15.4332	-17.6758
2012-11-01 11:29:39	15.2	17.39		3.79338	-15.4944	-17.7268
2012-11-01 11:39:39	15.25	17.45		3.80032	-15.5454	-17.788	2012-11-01 11:39:39
2012-11-01 11:49:39	15.31	17.5		3.80727	-15.6065	-17.8389
2012-11-01 11:59:39	15.36	17.54		3.81421	-15.6575	-17.8797
2012-11-01 12:09:39	15.44	17.62		3.82116	-15.739	-17.9613
2012-11-01 12:19:39	15.48	17.66		3.8281	-15.7798	-18.002
2012-11-01 12:29:39	15.54	17.72		3.83505	-15.841	-18.0632
2012-11-01 12:39:39	15.57	17.76		3.84199	-15.8716	-18.104	2012-11-01 12:39:39
2012-11-01 12:49:39	15.64	17.82		3.84894	-15.9429	-18.1651
2012-11-01 12:59:39	15.69	17.86		3.85588	-15.9939	-18.2059
2012-11-01 13:09:39	15.73	17.92		3.86282	-16.0347	-18.2671
2012-11-01 13:19:39	15.77	17.95		3.86977	-16.0754	-18.2977
2012-11-01 13:29:39	15.82	18		3.87671	-16.1264	-18.3486
2012-11-01 13:39:39	15.88	18.05		3.88366	-16.1876	-18.3996	2012-11-01 13:39:39
2012-11-01 13:49:39	15.92	18.11		3.8906	-16.2283	-18.4608
2012-11-01 13:59:39	15.98	18.15		3.89755	-16.2895	-18.5015
2012-11-01 14:09:39	16.03	18.19		3.90449	-16.3405	-18.5423
2012-11-01 14:19:39	16.1	18.27		3.91144	-16.4118	-18.6239
2012-11-01 14:29:39	16.14	18.31		3.91838	-16.4526	-18.6646
2012-11-01 14:39:39	16.18	18.35		3.92532	-16.4934	-18.7054	2012-11-01 14:39:39
2012-11-01 14:49:39	16.21	18.38		3.93227	-16.524	-18.736
2012-11-01 14:59:39	16.26	18.43		3.93921	-16.5749	-18.787
2012-11-01 15:09:39	16.3	18.48		3.94616	-16.6157	-18.8379
2012-11-01 15:19:39	16.37	18.54		3.9531	-16.6871	-18.8991
2012-11-01 15:29:39	16.4	18.57		3.96005	-16.7176	-18.9297
2012-11-01 15:39:39	16.45	18.63		3.96699	-16.7686	-18.9908	2012-11-01 15:39:39
2012-11-01 15:49:39	16.51	18.68		3.97394	-16.8298	-19.0418
2012-11-01 15:59:39	16.57	18.74		3.98088	-16.8909	-19.103
2012-11-01 16:09:39	16.61	18.78		3.98782	-16.9317	-19.1437
2012-11-01 16:19:39	16.66	18.83		3.99477	-16.9827	-19.1947
2012-11-01 16:29:39	16.69	18.87		4.00171	-17.0133	-19.2355
2012-11-01 16:39:39	16.74	18.91		4.00866	-17.0642	-19.2762	2012-11-01 16:39:39
2012-11-01 16:49:39	16.77	18.95		4.0156	-17.0948	-19.317
2012-11-01 16:59:39	16.82	19		4.02255	-17.1458	-19.368
2012-11-01 17:09:39	16.66	18.83		4.02949	-16.9827	-19.1947
2012-11-01 17:19:39	16.82	19.01		4.03644	-17.1458	-19.3782
2012-11-01 17:29:39	16.84	19.01		4.04338	-17.1662	-19.3782
2012-11-01 17:39:39	16.64	18.83		4.05032	-16.9623	-19.1947	2012-11-01 17:39:39
2012-11-01 17:49:39	16.84	19.04		4.05727	-17.1662	-19.4088
2012-11-01 17:59:39	16.94	19.13		4.06421	-17.2681	-19.5005
2012-11-01 18:09:39	16.96	19.16		4.07116	-17.2885	-19.5311
2012-11-01 18:19:39	17.02	19.21		4.0781	-17.3496	-19.5821
2012-11-01 18:29:39	17.07	19.25		4.08505	-17.4006	-19.6228
2012-11-01 18:39:39	17.14	19.3		4.09199	-17.472	-19.6738	2012-11-01 18:39:39
2012-11-01 18:49:39	17.2	19.35		4.09894	-17.5331	-19.7248
2012-11-01 18:59:39	17.26	19.42		4.10588	-17.5943	-19.7961
2012-11-01 19:09:39	17.3	19.45		4.11282	-17.6351	-19.8267
2012-11-01 19:19:39	17.38	19.53		4.11977	-17.7166	-19.9083
2012-11-01 19:29:39	17.46	19.6		4.12671	-17.7982	-19.9796
2012-11-01 19:39:39	17.49	19.64		4.13366	-17.8287	-20.0204	2012-11-01 19:39:39
2012-11-01 19:49:39	17.54	19.7		4.1406	-17.8797	-20.0815
2012-11-01 19:59:39	17.58	19.72		4.14755	-17.9205	-20.1019
2012-11-01 20:09:39	17.64	19.78		4.15449	-17.9817	-20.1631
2012-11-01 20:19:39	17.7	19.84		4.16144	-18.0428	-20.2243
2012-11-01 20:29:39	17.78	19.9		4.16838	-18.1244	-20.2854
2012-11-01 20:39:39	17.84	19.96		4.17532	-18.1855	-20.3466	2012-11-01 20:39:39
2012-11-01 20:49:39	17.9	20		4.18227	-18.2467	-20.3874
2012-11-01 20:59:39	17.97	20.08		4.18921	-18.318	-20.4689
2012-11-01 21:09:39	18.02	20.14		4.19616	-18.369	-20.5301
2012-11-01 21:19:39	18.08	20.19		4.2031	-18.4302	-20.581
2012-11-01 21:29:39	18.13	20.24		4.21005	-18.4811	-20.632
2012-11-01 21:39:39	18.19	20.3		4.21699	-18.5423	-20.6932	2012-11-01 21:39:39
2012-11-01 21:49:39	18.26	20.35		4.22394	-18.6137	-20.7441
2012-11-01 21:59:39	18.32	20.41		4.23088	-18.6748	-20.8053
2012-11-01 22:09:39	18.4	20.47		4.23782	-18.7564	-20.8665
2012-11-01 22:19:39	18.41	20.52		4.24477	-18.7666	-20.9174
2012-11-01 22:29:39	18.49	20.59		4.25171	-18.8481	-20.9888
2012-11-01 22:39:39	18.56	20.65		4.25866	-18.9195	-21.0499	2012-11-01 22:39:39
2012-11-01 22:49:39	18.56	20.67		4.2656	-18.9195	-21.0703
2012-11-01 22:59:39	18.67	20.75		4.27255	-19.0316	-21.1519
2012-11-01 23:09:39	18.73	20.81		4.27949	-19.0928	-21.213
2012-11-01 23:19:39	18.78	20.86		4.28644	-19.1437	-21.264
2012-11-01 23:29:39	18.83	20.93		4.29338	-19.1947	-21.3354
2012-11-01 23:39:39	18.9	21		4.30032	-19.2661	-21.4067	2012-11-01 23:39:39
2012-11-01 23:49:39	18.96	21.05		4.30727	-19.3272	-21.4577
2012-11-01 23:59:39	19.02	21.12		4.31421	-19.3884	-21.5291
2012-11-02 00:09:39	19.07	21.17		4.32116	-19.4393	-21.58
2012-11-02 00:19:39	19.14	21.24		4.3281	-19.5107	-21.6514
2012-11-02 00:29:39	19.18	21.3		4.33505	-19.5515	-21.7125
2012-11-02 00:39:39	19.23	21.34		4.34199	-19.6024	-21.7533	2012-11-02 00:39:39
2012-11-02 00:49:39	19.28	21.4		4.34894	-19.6534	-21.8145
2012-11-02 00:59:39	19.35	21.46		4.35588	-19.7248	-21.8756
2012-11-02 01:09:39	19.41	21.52		4.36282	-19.7859	-21.9368
2012-11-02 01:19:39	19.45	21.57		4.36977	-19.8267	-21.9878
2012-11-02 01:29:39	19.53	21.64		4.37671	-19.9083	-22.0591
2012-11-02 01:39:39	19.55	21.66		4.38366	-19.9286	-22.0795	2012-11-02 01:39:39
2012-11-02 01:49:39	19.61	21.73		4.3906	-19.9898	-22.1509
2012-11-02 01:59:39	19.68	21.8		4.39755	-20.0612	-22.2222
2012-11-02 02:09:39	19.74	21.86		4.40449	-20.1223	-22.2834
2012-11-02 02:19:39	19.8	21.92		4.41144	-20.1835	-22.3445
2012-11-02 02:29:39	19.87	22		4.41838	-20.2548	-22.4261
2012-11-02 02:39:39	19.92	22.03		4.42532	-20.3058	-22.4567	2012-11-02 02:39:39
2012-11-02 02:49:39	19.94	22.07		4.43227	-20.3262	-22.4975
2012-11-02 02:59:39	20.01	22.14		4.43921	-20.3976	-22.5688
2012-11-02 03:09:39	20.06	22.19		4.44616	-20.4485	-22.6198
2012-11-02 03:19:39	20.12	22.24		4.4531	-20.5097	-22.6707
2012-11-02 03:29:39	20.14	22.29		4.46005	-20.5301	-22.7217
2012-11-02 03:39:39	20.17	22.32		4.46699	-20.5607	-22.7523	2012-11-02 03:39:39
2012-11-02 03:49:39	20.22	22.36		4.47394	-20.6116	-22.7931
2012-11-02 03:59:39	20.25	22.4		4.48088	-20.6422	-22.8338
2012-11-02 04:09:39	20.29	22.45		4.48782	-20.683	-22.8848
2012-11-02 04:19:39	20.36	22.5		4.49477	-20.7543	-22.9358
2012-11-02 04:29:39	20.39	22.54		4.50171	-20.7849	-22.9766
2012-11-02 04:39:39	20.43	22.57		4.50866	-20.8257	-23.0071	2012-11-02 04:39:39
2012-11-02 04:49:39	20.47	22.6		4.5156	-20.8665	-23.0377
2012-11-02 04:59:39	20.53	22.67		4.52255	-20.9276	-23.1091
2012-11-02 05:09:39	20.6	22.72		4.52949	-20.999	-23.16
2012-11-02 05:19:39	20.65	22.78		4.53644	-21.0499	-23.2212
2012-11-02 05:29:39	20.72	22.85		4.54338	-21.1213	-23.2926
2012-11-02 05:39:39	20.75	22.87		4.55032	-21.1519	-23.3129	2012-11-02 05:39:39
2012-11-02 05:49:39	20.81	22.94		4.55727	-21.213	-23.3843
2012-11-02 05:59:39	20.87	22.99		4.56421	-21.2742	-23.4353
2012-11-02 06:09:39	20.92	23.04		4.57116	-21.3252	-23.4862
2012-11-02 06:19:39	20.98	23.1		4.5781	-21.3863	-23.5474
2012-11-02 06:29:39	21.07	23.18		4.58505	-21.4781	-23.629
2012-11-02 06:39:39	21.1	23.19		4.59199	-21.5087	-23.6391	2012-11-02 06:39:39
2012-11-02 06:49:39	21.15	23.25		4.59894	-21.5596	-23.7003
2012-11-02 06:59:39	21.19	23.3		4.60588	-21.6004	-23.7513
2012-11-02 07:09:39	21.23	23.35		4.61282	-21.6412	-23.8022
2012-11-02 07:19:39	21.29	23.41		4.61977	-21.7023	-23.8634
2012-11-02 07:29:39	21.36	23.48		4.62671	-21.7737	-23.9348
2012-11-02 07:39:39	21.39	23.49		4.63366	-21.8043	-23.945	2012-11-02 07:39:39
2012-11-02 07:49:39	21.42	23.55		4.6406	-21.8349	-24.0061
2012-11-02 07:59:39	21.42	23.58		4.64755	-21.8349	-24.0367
2012-11-02 08:09:39	21.47	23.63		4.65449	-21.8858	-24.0877
2012-11-02 08:19:39	21.51	23.65		4.66144	-21.9266	-24.1081
2012-11-02 08:29:39	21.54	23.67		4.66838	-21.9572	-24.1284
2012-11-02 08:39:39	21.59	23.72		4.67532	-22.0082	-24.1794	2012-11-02 08:39:39
2012-11-02 08:49:39	21.63	23.79		4.68227	-22.0489	-24.2508
2012-11-02 08:59:39	21.67	23.8		4.68921	-22.0897	-24.261
2012-11-02 09:09:39	21.72	23.86		4.69616	-22.1407	-24.3221
2012-11-02 09:19:39	21.76	23.92		4.7031	-22.1814	-24.3833
2012-11-02 09:29:39	21.8	23.95		4.71005	-22.2222	-24.4139
2012-11-02 09:39:39	21.85	23.96		4.71699	-22.2732	-24.4241	2012-11-02 09:39:39
2012-11-02 09:49:39	21.87	24.03		4.72394	-22.2936	-24.4954
2012-11-02 09:59:39	21.91	24.07		4.73088	-22.3344	-24.5362
2012-11-02 10:09:39	21.95	24.11		4.73782	-22.3751	-24.577
2012-11-02 10:19:39	22	24.15		4.74477	-22.4261	-24.6177
2012-11-02 10:29:39	22.05	24.19		4.75171	-22.4771	-24.6585
2012-11-02 10:39:39	22.09	24.23		4.75866	-22.5178	-24.6993	2012-11-02 10:39:39
2012-11-02 10:49:39	22.17	24.31		4.7656	-22.5994	-24.7808
2012-11-02 10:59:39	22.09	24.23		4.77255	-22.5178	-24.6993
2012-11-02 11:09:39	22.18	24.32		4.77949	-22.6096	-24.791
2012-11-02 11:19:39	22.23	24.37		4.78644	-22.6606	-24.842
2012-11-02 11:29:39	22	24.32		4.79338	-22.4261	-24.791
2012-11-02 11:39:39	22.28	24.42		4.80032	-22.7115	-24.893	2012-11-02 11:39:39
2012-11-02 11:49:39	22.32	24.47		4.80727	-22.7523	-24.9439
2012-11-02 11:59:39	22.39	24.54		4.81421	-22.8236	-25.0153
2012-11-02 12:09:39	22.42	24.57		4.82116	-22.8542	-25.0459
2012-11-02 12:19:39	22.45	24.6		4.8281	-22.8848	-25.0765
2012-11-02 12:29:39	22.49	24.65		4.83505	-22.9256	-25.1274
2012-11-02 12:39:39	22.54	24.67		4.84199	-22.9766	-25.1478	2012-11-02 12:39:39
2012-11-02 12:49:39	22.6	24.73		4.84894	-23.0377	-25.209
2012-11-02 12:59:39	22.65	24.78		4.85588	-23.0887	-25.2599
2012-11-02 13:09:39	22.66	24.81		4.86282	-23.0989	-25.2905
2012-11-02 13:19:39	22.69	24.84		4.86977	-23.1295	-25.3211
2012-11-02 13:29:39	22.74	24.88		4.87671	-23.1804	-25.3619
2012-11-02 13:39:39	22.8	24.91		4.88366	-23.2416	-25.3925	2012-11-02 13:39:39
2012-11-02 13:49:39	22.85	24.98		4.8906	-23.2926	-25.4638
2012-11-02 13:59:39	22.91	25.05		4.89755	-23.3537	-25.5352
2012-11-02 14:09:39	22.88	25.02		4.90449	-23.3231	-25.5046
2012-11-02 14:19:39	22.9	25.08		4.91144	-23.3435	-25.5657
2012-11-02 14:29:39	22.98	25.13		4.91838	-23.4251	-25.6167
2012-11-02 14:39:39	22.91	25.18		4.92532	-23.3537	-25.6677	2012-11-02 14:39:39
2012-11-02 14:49:39	23.24	26.26		4.93227	-23.6901	-26.7686
2012-11-02 14:59:39	22.45	24.6		4.93921	-22.8848	-25.0765
2012-11-02 15:09:39	22.76	24.93		4.94616	-23.2008	-25.4128
2012-11-02 15:19:39	22.96	25.13		4.9531	-23.4047	-25.6167
2012-11-02 15:29:39	23.03	25.18		4.96005	-23.476	-25.6677
2012-11-02 15:39:39	23.09	25.26		4.96699	-23.5372	-25.7492	2012-11-02 15:39:39
2012-11-02 15:49:39	23.15	25.29		4.97394	-23.5984	-25.7798
2012-11-02 15:59:39	23.2	25.35		4.98088	-23.6493	-25.841
2012-11-02 16:09:39	23.27	25.41		4.98782	-23.7207	-25.9021
2012-11-02 16:19:39	23.33	25.46		4.99477	-23.7819	-25.9531
2012-11-02 16:29:39	23.4	25.52		5.00171	-23.8532	-26.0143
2012-11-02 16:39:39	23.46	25.58		5.00866	-23.9144	-26.0754	2012-11-02 16:39:39
2012-11-02 16:49:39	23.51	25.63		5.0156	-23.9653	-26.1264
2012-11-02 16:59:39	23.57	25.68		5.02255	-24.0265	-26.1774
2012-11-02 17:09:39	23.64	25.74		5.02949	-24.0979	-26.2385
2012-11-02 17:19:39	23.67	25.78		5.03644	-24.1284	-26.2793
2012-11-02 17:29:39	23.74	25.86		5.04338	-24.1998	-26.3609
2012-11-02 17:39:39	23.76	25.89		5.05032	-24.2202	-26.3914	2012-11-02 17:39:39
2012-11-02 17:49:39	23.84	25.95		5.05727	-24.3017	-26.4526
2012-11-02 17:59:39	23.9	26		5.06421	-24.3629	-26.5036
2012-11-02 18:09:39	23.95	26.07		5.07116	-24.4139	-26.5749
2012-11-02 18:19:39	24.03	26.13		5.0781	-24.4954	-26.6361
2012-11-02 18:29:39	24.07	26.17		5.08505	-24.5362	-26.6769
2012-11-02 18:39:39	24.11	26.22		5.09199	-24.577	-26.7278	2012-11-02 18:39:39
2012-11-02 18:49:39	24.19	26.3		5.09894	-24.6585	-26.8094
2012-11-02 18:59:39	24.21	26.31		5.10588	-24.6789	-26.8196
2012-11-02 19:09:39	24.29	26.4		5.11282	-24.7604	-26.9113
2012-11-02 19:19:39	24.32	26.42		5.11977	-24.791	-26.9317
2012-11-02 19:29:39	24.4	26.49		5.12671	-24.8726	-27.0031
2012-11-02 19:39:39	24.44	26.54		5.13366	-24.9134	-27.054	2012-11-02 19:39:39
2012-11-02 19:49:39	24.48	26.59		5.1406	-24.9541	-27.105
2012-11-02 19:59:39	24.54	26.66		5.14755	-25.0153	-27.1764
2012-11-02 20:09:39	24.6	26.7		5.15449	-25.0765	-27.2171
2012-11-02 20:19:39	24.47	26.6		5.16144	-24.9439	-27.1152
2012-11-02 20:29:39	24.65	26.78		5.16838	-25.1274	-27.2987
2012-11-02 20:39:39	24.74	26.87		5.17532	-25.2192	-27.3904	2012-11-02 20:39:39
2012-11-02 20:49:39	24.82	26.93		5.18227	-25.3007	-27.4516
2012-11-02 20:59:39	24.88	27.01		5.18921	-25.3619	-27.5331
2012-11-02 21:09:39	24.95	27.08		5.19616	-25.4332	-27.6045
2012-11-02 21:19:39	24.98	27.11		5.2031	-25.4638	-27.6351
2012-11-02 21:29:39	25.06	27.2		5.21005	-25.5454	-27.7268
2012-11-02 21:39:39	25.12	27.26		5.21699	-25.6065	-27.788	2012-11-02 21:39:39
2012-11-02 21:49:39	25.2	27.33		5.22394	-25.6881	-27.8593
2012-11-02 21:59:39	25.26	27.39		5.23088	-25.7492	-27.9205
2012-11-02 22:09:39	25.31	27.44		5.23782	-25.8002	-27.9715
2012-11-02 22:19:39	25.37	27.51		5.24477	-25.8614	-28.0428
2012-11-02 22:29:39	25.44	27.57		5.25171	-25.9327	-28.104
2012-11-02 22:39:39	25.48	27.63		5.25866	-25.9735	-28.1651	2012-11-02 22:39:39
2012-11-02 22:49:39	25.55	27.67		5.2656	-26.0449	-28.2059
2012-11-02 22:59:39	25.58	27.72		5.27255	-26.0754	-28.2569
2012-11-02 23:09:39	25.65	27.76		5.27949	-26.1468	-28.2977
2012-11-02 23:19:39	25.68	27.83		5.28644	-26.1774	-28.369
2012-11-02 23:29:39	25.77	27.9		5.29338	-26.2691	-28.4404
2012-11-02 23:39:39	25.83	27.97		5.30032	-26.3303	-28.5117	2012-11-02 23:39:39
2012-11-02 23:49:39	25.89	28.02		5.30727	-26.3914	-28.5627
2012-11-02 23:59:39	25.96	28.1		5.31421	-26.4628	-28.6442
2012-11-03 00:09:39	26	28.13		5.32116	-26.5036	-28.6748
2012-11-03 00:19:39	26.07	28.22		5.3281	-26.5749	-28.7666
2012-11-03 00:29:39	26.15	28.27		5.33505	-26.6565	-28.8175
2012-11-03 00:39:39	26.2	28.32		5.34199	-26.7074	-28.8685	2012-11-03 00:39:39
2012-11-03 00:49:39	26.28	28.4		5.34894	-26.789	-28.9501
2012-11-03 00:59:39	26.33	28.46		5.35588	-26.84	-29.0112
2012-11-03 01:09:39	26.39	28.52		5.36282	-26.9011	-29.0724
2012-11-03 01:19:39	26.46	28.59		5.36977	-26.9725	-29.1437
2012-11-03 01:29:39	26.52	28.65		5.37671	-27.0336	-29.2049
2012-11-03 01:39:39	26.62	28.74		5.38366	-27.1356	-29.2966	2012-11-03 01:39:39
2012-11-03 01:49:39	26.66	28.78		5.3906	-27.1764	-29.3374
2012-11-03 01:59:39	26.73	28.86		5.39755	-27.2477	-29.419
2012-11-03 02:09:39	26.78	28.9		5.40449	-27.2987	-29.4597
2012-11-03 02:19:39	26.87	28.99		5.41144	-27.3904	-29.5515
2012-11-03 02:29:39	26.94	29.06		5.41838	-27.4618	-29.6228
2012-11-03 02:39:39	27	29.13		5.42532	-27.5229	-29.6942	2012-11-03 02:39:39
2012-11-03 02:49:39	27.07	29.18		5.43227	-27.5943	-29.7452
2012-11-03 02:59:39	27.13	29.25		5.43921	-27.6555	-29.8165
2012-11-03 03:09:39	27.2	29.33		5.44616	-27.7268	-29.8981
2012-11-03 03:19:39	27.24	29.37		5.4531	-27.7676	-29.9388
2012-11-03 03:29:39	27.3	29.43		5.46005	-27.8287	-30
2012-11-03 03:39:39	27.37	29.51		5.46699	-27.9001	-30.0815	2012-11-03 03:39:39
2012-11-03 03:49:39	27.41	29.55		5.47394	-27.9409	-30.1223
2012-11-03 03:59:39	27.48	29.62		5.48088	-28.0122	-30.1937
2012-11-03 04:09:39	27.52	29.66		5.48782	-28.053	-30.2345
2012-11-03 04:19:39	27.59	29.72		5.49477	-28.1244	-30.2956
2012-11-03 04:29:39	27.66	29.78		5.50171	-28.1957	-30.3568
2012-11-03 04:39:39	27.74	29.87		5.50866	-28.2773	-30.4485	2012-11-03 04:39:39
2012-11-03 04:49:39	27.8	29.93		5.5156	-28.3384	-30.5097
2012-11-03 04:59:39	27.85	29.97		5.52255	-28.3894	-30.5505
2012-11-03 05:09:39	27.9	30.04		5.52949	-28.4404	-30.6218
2012-11-03 05:19:39	27.96	30.09		5.53644	-28.5015	-30.6728
2012-11-03 05:29:39	28.02	30.16		5.54338	-28.5627	-30.7441
2012-11-03 05:39:39	28.06	30.19		5.55032	-28.6035	-30.7747	2012-11-03 05:39:39
2012-11-03 05:49:39	28.13	30.25		5.55727	-28.6748	-30.8359
2012-11-03 05:59:39	28.18	30.32		5.56421	-28.7258	-30.9072
2012-11-03 06:09:39	28.26	30.38		5.57116	-28.8073	-30.9684
2012-11-03 06:19:39	28.33	30.45		5.5781	-28.8787	-31.0398
2012-11-03 06:29:39	28.35	30.48		5.58505	-28.8991	-31.0703
2012-11-03 06:39:39	28.42	30.55		5.59199	-28.9704	-31.1417	2012-11-03 06:39:39
2012-11-03 06:49:39	28.48	30.62		5.59894	-29.0316	-31.213
2012-11-03 06:59:39	28.53	30.66		5.60588	-29.0826	-31.2538
2012-11-03 07:09:39	28.6	30.73		5.61282	-29.1539	-31.3252
2012-11-03 07:19:39	28.65	30.76		5.61977	-29.2049	-31.3558
2012-11-03 07:29:39	28.71	30.84		5.62671	-29.2661	-31.4373
2012-11-03 07:39:39	28.77	30.9		5.63366	-29.3272	-31.4985	2012-11-03 07:39:39
2012-11-03 07:49:39	28.83	30.96		5.6406	-29.3884	-31.5596
2012-11-03 07:59:39	28.89	31.02		5.64755	-29.4495	-31.6208
2012-11-03 08:09:39	28.95	31.09		5.65449	-29.5107	-31.6922
2012-11-03 08:19:39	29.03	31.15		5.66144	-29.5923	-31.7533
2012-11-03 08:29:39	29.1	31.23		5.66838	-29.6636	-31.8349
2012-11-03 08:39:39	29.16	31.28		5.67532	-29.7248	-31.8858	2012-11-03 08:39:39
2012-11-03 08:49:39	29.23	31.35		5.68227	-29.7961	-31.9572
2012-11-03 08:59:39	29.29	31.42		5.68921	-29.8573	-32.0285
2012-11-03 09:09:39	29.36	31.5		5.69616	-29.9286	-32.1101
2012-11-03 09:19:39	29.44	31.56		5.7031	-30.0102	-32.1713
2012-11-03 09:29:39	29.51	31.63		5.71005	-30.0815	-32.2426
2012-11-03 09:39:39	29.56	31.69		5.71699	-30.1325	-32.3038	2012-11-03 09:39:39
2012-11-03 09:49:39	29.62	31.75		5.72394	-30.1937	-32.3649
2012-11-03 09:59:39	29.69	31.8		5.73088	-30.265	-32.4159
2012-11-03 10:09:39	29.75	31.89		5.73782	-30.3262	-32.5076
2012-11-03 10:19:39	29.8	31.92		5.74477	-30.3772	-32.5382
2012-11-03 10:29:39	29.61	31.74		5.75171	-30.1835	-32.3547
2012-11-03 10:39:39	29.84	31.97		5.75866	-30.4179	-32.5892	2012-11-03 10:39:39
2012-11-03 10:49:39	29.95	32.08		5.7656	-30.5301	-32.7013
2012-11-03 10:59:39	30	32.13		5.77255	-30.581	-32.7523
2012-11-03 11:09:39	30.09	32.2		5.77949	-30.6728	-32.8236
2012-11-03 11:19:39	30.16	32.29		5.78644	-30.7441	-32.9154
2012-11-03 11:29:39	30.24	32.36		5.79338	-30.8257	-32.9867
2012-11-03 11:39:39	30.28	32.41		5.80032	-30.8665	-33.0377	2012-11-03 11:39:39
2012-11-03 11:49:39	30.36	32.5		5.80727	-30.948	-33.1295
2012-11-03 11:59:39	30.44	32.57		5.81421	-31.0296	-33.2008
2012-11-03 12:09:39	30.52	32.65		5.82116	-31.1111	-33.2824
2012-11-03 12:19:39	30.56	32.7		5.8281	-31.1519	-33.3333
2012-11-03 12:29:39	30.62	32.75		5.83505	-31.213	-33.3843
2012-11-03 12:39:39	30.68	32.81		5.84199	-31.2742	-33.4455	2012-11-03 12:39:39
2012-11-03 12:49:39	30.76	32.89		5.84894	-31.3558	-33.527
2012-11-03 12:59:39	30.81	32.93		5.85588	-31.4067	-33.5678
2012-11-03 13:09:39	30.88	33.01		5.86282	-31.4781	-33.6493
2012-11-03 13:19:39	30.95	33.08		5.86977	-31.5494	-33.7207
2012-11-03 13:29:39	31.02	33.14		5.87671	-31.6208	-33.7819
2012-11-03 13:39:39	31.09	33.21		5.88366	-31.6922	-33.8532	2012-11-03 13:39:39
2012-11-03 13:49:39	31.15	33.27		5.8906	-31.7533	-33.9144
2012-11-03 13:59:39	31.21	33.34		5.89755	-31.8145	-33.9857
2012-11-03 14:09:39	31.29	33.42		5.90449	-31.896	-34.0673
2012-11-03 14:19:39	31.35	33.47		5.91144	-31.9572	-34.1182
2012-11-03 14:29:39	31.41	33.54		5.91838	-32.0183	-34.1896
2012-11-03 14:39:39	31.49	33.61		5.92532	-32.0999	-34.261	2012-11-03 14:39:39
2012-11-03 14:49:39	31.56	33.68		5.93227	-32.1713	-34.3323
2012-11-03 14:59:39	31.63	33.75		5.93921	-32.2426	-34.4037
2012-11-03 15:09:39	31.69	33.81		5.94616	-32.3038	-34.4648
2012-11-03 15:19:39	31.77	33.9		5.9531	-32.3853	-34.5566
2012-11-03 15:29:39	31.03	33.22		5.96005	-31.631	-33.8634
2012-11-03 15:39:39	31.46	33.64		5.96699	-32.0693	-34.2915	2012-11-03 15:39:39
2012-11-03 15:49:39	31.69	33.89		5.97394	-32.3038	-34.5464
2012-11-03 15:59:39	31.8	33.99		5.98088	-32.4159	-34.6483
2012-11-03 16:09:39	31.83	34		5.98782	-32.4465	-34.6585
2012-11-03 16:19:39	31.91	34.08		5.99477	-32.528	-34.7401
2012-11-03 16:29:39	31.98	34.13		6.00171	-32.5994	-34.791
2012-11-03 16:39:39	32.04	34.19		6.00866	-32.6606	-34.8522	2012-11-03 16:39:39
2012-11-03 16:49:39	32.11	34.25		6.0156	-32.7319	-34.9134
2012-11-03 16:59:39	32.17	34.31		6.02255	-32.7931	-34.9745
2012-11-03 17:09:39	32.24	34.38		6.02949	-32.8644	-35.0459
2012-11-03 17:19:39	32.31	34.44		6.03644	-32.9358	-35.107
2012-11-03 17:29:39	32.36	34.49		6.04338	-32.9867	-35.158
2012-11-03 17:39:39	32.44	34.55		6.05032	-33.0683	-35.2192	2012-11-03 17:39:39
2012-11-03 17:49:39	32.5	34.63		6.05727	-33.1295	-35.3007
2012-11-03 17:59:39	32.59	34.7		6.06421	-33.2212	-35.3721
2012-11-03 18:09:39	32.65	34.78		6.07116	-33.2824	-35.4536
2012-11-03 18:19:39	32.74	34.86		6.0781	-33.3741	-35.5352
2012-11-03 18:29:39	32.47	34.57		6.08505	-33.0989	-35.2396
2012-11-03 18:39:39	32.75	34.86		6.09199	-33.3843	-35.5352	2012-11-03 18:39:39
2012-11-03 18:49:39	32.86	34.97		6.09894	-33.4964	-35.6473
2012-11-03 18:59:39	32.94	35.06		6.10588	-33.578	-35.739
2012-11-03 19:09:39	33.03	35.14		6.11282	-33.6697	-35.8206
2012-11-03 19:19:39	33.12	35.22		6.11977	-33.7615	-35.9021
2012-11-03 19:29:39	33.17	35.29		6.12671	-33.8124	-35.9735
2012-11-03 19:39:39	33.27	35.38		6.13366	-33.9144	-36.0652	2012-11-03 19:39:39
2012-11-03 19:49:39	33.35	35.44		6.1406	-33.9959	-36.1264
2012-11-03 19:59:39	33.42	35.51		6.14755	-34.0673	-36.1978
2012-11-03 20:09:39	33.5	35.6		6.15449	-34.1488	-36.2895
2012-11-03 20:19:39	33.58	35.67		6.16144	-34.2304	-36.3609
2012-11-03 20:29:39	33.66	35.77		6.16838	-34.3119	-36.4628
2012-11-03 20:39:39	33.72	35.83		6.17532	-34.3731	-36.524	2012-11-03 20:39:39
2012-11-03 20:49:39	33.81	35.91		6.18227	-34.4648	-36.6055
2012-11-03 20:59:39	33.9	36		6.18921	-34.5566	-36.6972
2012-11-03 21:09:39	33.98	36.08		6.19616	-34.6381	-36.7788
2012-11-03 21:19:39	34.04	36.13		6.2031	-34.6993	-36.8298
2012-11-03 21:29:39	34.13	36.23		6.21005	-34.791	-36.9317
2012-11-03 21:39:39	34.23	36.3		6.21699	-34.893	-37.0031	2012-11-03 21:39:39
2012-11-03 21:49:39	34.29	36.39		6.22394	-34.9541	-37.0948
2012-11-03 21:59:39	34.36	36.47		6.23088	-35.0255	-37.1764
2012-11-03 22:09:39	34.45	36.55		6.23782	-35.1172	-37.2579
2012-11-03 22:19:39	34.56	36.65		6.24477	-35.2294	-37.3598
2012-11-03 22:29:39	34.64	36.74		6.25171	-35.3109	-37.4516
2012-11-03 22:39:39	34.72	36.82		6.25866	-35.3925	-37.5331	2012-11-03 22:39:39
2012-11-03 22:49:39	34.82	36.91		6.2656	-35.4944	-37.6249
2012-11-03 22:59:39	34.91	37		6.27255	-35.5861	-37.7166
2012-11-03 23:09:39	35	37.09		6.27949	-35.6779	-37.8084
2012-11-03 23:19:39	35.08	37.17		6.28644	-35.7594	-37.8899
2012-11-03 23:29:39	35.17	37.26		6.29338	-35.8512	-37.9817
2012-11-03 23:39:39	35.28	37.37		6.30032	-35.9633	-38.0938	2012-11-03 23:39:39
2012-11-03 23:49:39	35.32	37.44		6.30727	-36.0041	-38.1651
2012-11-03 23:59:39	35.46	37.55		6.31421	-36.1468	-38.2773
2012-11-04 00:09:39	35.53	37.63		6.32116	-36.2181	-38.3588
2012-11-04 00:19:39	35.62	37.7		6.3281	-36.3099	-38.4302
2012-11-04 00:29:39	35.7	37.8		6.33505	-36.3914	-38.5321
2012-11-04 00:39:39	35.78	37.89		6.34199	-36.473	-38.6239	2012-11-04 00:39:39
2012-11-04 00:49:39	35.85	37.95		6.34894	-36.5443	-38.685
2012-11-04 00:59:39	35.95	38.05		6.35588	-36.6463	-38.787
2012-11-04 01:09:39	36.04	38.14		6.36282	-36.738	-38.8787
2012-11-04 01:19:39	36.11	38.21		6.36977	-36.8094	-38.9501
2012-11-04 01:29:39	36.22	38.31		6.37671	-36.9215	-39.052
2012-11-04 01:39:39	36.31	38.4		6.38366	-37.0133	-39.1437	2012-11-04 01:39:39
2012-11-04 01:49:39	36.41	38.51		6.3906	-37.1152	-39.2559
2012-11-04 01:59:39	36.47	38.57		6.39755	-37.1764	-39.317
2012-11-04 02:09:39	36.56	38.65		6.40449	-37.2681	-39.3986
2012-11-04 02:19:39	36.65	38.75		6.41144	-37.3598	-39.5005
2012-11-04 02:29:39	36.73	38.83		6.41838	-37.4414	-39.5821
2012-11-04 02:39:39	36.81	38.91		6.42532	-37.5229	-39.6636	2012-11-04 02:39:39
2012-11-04 02:49:39	36.9	39.01		6.43227	-37.6147	-39.7655
2012-11-04 02:59:39	37.01	39.11		6.43921	-37.7268	-39.8675
2012-11-04 03:09:39	37.11	39.21		6.44616	-37.8287	-39.9694
2012-11-04 03:19:39	37.19	39.3		6.4531	-37.9103	-40.0612
2012-11-04 03:29:39	37.28	39.38		6.46005	-38.002	-40.1427
2012-11-04 03:39:39	37.33	39.44		6.46699	-38.053	-40.2039	2012-11-04 03:39:39
2012-11-04 03:49:39	37.44	39.54		6.47394	-38.1651	-40.3058
2012-11-04 03:59:39	37.51	39.62		6.48088	-38.2365	-40.3874
2012-11-04 04:09:39	37.62	39.72		6.48782	-38.3486	-40.4893
2012-11-04 04:19:39	37.68	39.79		6.49477	-38.4098	-40.5607
2012-11-04 04:29:39	37.78	39.89		6.50171	-38.5117	-40.6626
2012-11-04 04:39:39	37.85	39.97		6.50866	-38.5831	-40.7441	2012-11-04 04:39:39
2012-11-04 04:49:39	37.96	40.07		6.5156	-38.6952	-40.8461
2012-11-04 04:59:39	38.05	40.12		6.52255	-38.787	-40.897
2012-11-04 05:09:39	38.14	40.24		6.52949	-38.8787	-41.0194
2012-11-04 05:19:39	38.23	40.34		6.53644	-38.9704	-41.1213
2012-11-04 05:29:39	38.3	40.41		6.54338	-39.0418	-41.1927
2012-11-04 05:39:39	38.42	40.5		6.55032	-39.1641	-41.2844	2012-11-04 05:39:39
2012-11-04 05:49:39	38.49	40.59		6.55727	-39.2355	-41.3761
2012-11-04 05:59:39	38.56	40.68		6.56421	-39.3068	-41.4679
2012-11-04 06:09:39	38.66	40.76		6.57116	-39.4088	-41.5494
2012-11-04 06:19:39	38.73	40.84		6.5781	-39.4801	-41.631
2012-11-04 06:29:39	38.82	40.93		6.58505	-39.5719	-41.7227
2012-11-04 06:39:39	38.92	41.03		6.59199	-39.6738	-41.8247	2012-11-04 06:39:39
2012-11-04 06:49:39	39	41.08		6.59894	-39.7554	-41.8756
2012-11-04 06:59:39	39.09	41.17		6.60588	-39.8471	-41.9674
2012-11-04 07:09:39	39.14	41.26		6.61282	-39.8981	-42.0591
2012-11-04 07:19:39	39.26	41.37		6.61977	-40.0204	-42.1713
2012-11-04 07:29:39	39.35	41.43		6.62671	-40.1121	-42.2324
2012-11-04 07:39:39	39.42	41.49		6.63366	-40.1835	-42.2936	2012-11-04 07:39:39
2012-11-04 07:49:39	39.49	41.57		6.6406	-40.2548	-42.3751
2012-11-04 07:59:39	39.57	41.65		6.64755	-40.3364	-42.4567
2012-11-04 08:09:39	39.64	41.7		6.65449	-40.4077	-42.5076
2012-11-04 08:19:39	39.71	41.83		6.66144	-40.4791	-42.6402
2012-11-04 08:29:39	39.78	41.88		6.66838	-40.5505	-42.6911
2012-11-04 08:39:39	39.86	41.95		6.67532	-40.632	-42.7625	2012-11-04 08:39:39
2012-11-04 08:49:39	39.94	42.02		6.68227	-40.7136	-42.8338
2012-11-04 08:59:39	40.01	42.11		6.68921	-40.7849	-42.9256
2012-11-04 09:09:39	40.07	42.19		6.69616	-40.8461	-43.0071
2012-11-04 09:19:39	40.16	42.29		6.7031	-40.9378	-43.1091
2012-11-04 09:29:39	40.23	42.36		6.71005	-41.0092	-43.1804
2012-11-04 09:39:39	40.31	42.42		6.71699	-41.0907	-43.2416	2012-11-04 09:39:39
2012-11-04 09:49:39	40.41	42.52		6.72394	-41.1927	-43.3435
2012-11-04 09:59:39	40.48	42.6		6.73088	-41.264	-43.4251
2012-11-04 10:09:39	40.56	42.68		6.73782	-41.3456	-43.5066
2012-11-04 10:19:39	40.66	42.75		6.74477	-41.4475	-43.578
2012-11-04 10:29:39	40.74	42.85		6.75171	-41.5291	-43.6799
2012-11-04 10:39:39	40.8	42.92		6.75866	-41.5902	-43.7513	2012-11-04 10:39:39
2012-11-04 10:49:39	40.89	43.01		6.7656	-41.682	-43.843
2012-11-04 10:59:39	40.97	43.08		6.77255	-41.7635	-43.9144
2012-11-04 11:09:39	41.05	43.17		6.77949	-41.8451	-44.0061
2012-11-04 11:19:39	41.19	43.31		6.78644	-41.9878	-44.1488
2012-11-04 11:29:39	41.16	43.3		6.79338	-41.9572	-44.1386
2012-11-04 11:39:39	41.26	43.41		6.80032	-42.0591	-44.2508	2012-11-04 11:39:39
2012-11-04 11:49:39	41.36	43.49		6.80727	-42.1611	-44.3323
2012-11-04 11:59:39	41.45	43.59		6.81421	-42.2528	-44.4343
2012-11-04 12:09:39	41.52	43.66		6.82116	-42.3242	-44.5056
2012-11-04 12:19:39	41.62	43.75		6.8281	-42.4261	-44.5973
2012-11-04 12:29:39	41.7	43.83		6.83505	-42.5076	-44.6789
2012-11-04 12:39:39	41.81	43.94		6.84199	-42.6198	-44.791	2012-11-04 12:39:39
2012-11-04 12:49:39	41.88	43.99		6.84894	-42.6911	-44.842
2012-11-04 12:59:39	41.99	44.12		6.85588	-42.8033	-44.9745
2012-11-04 13:09:39	42.05	44.18		6.86282	-42.8644	-45.0357
2012-11-04 13:19:39	42.15	44.28		6.86977	-42.9664	-45.1376
2012-11-04 13:29:39	42.23	44.36		6.87671	-43.0479	-45.2192
2012-11-04 13:39:39	42.32	44.46		6.88366	-43.1397	-45.3211	2012-11-04 13:39:39
2012-11-04 13:49:39	42.4	44.54		6.8906	-43.2212	-45.4027
2012-11-04 13:59:39	42.47	44.6		6.89755	-43.2926	-45.4638
2012-11-04 14:09:39	42.59	44.71		6.90449	-43.4149	-45.5759
2012-11-04 14:19:39	42.65	44.78		6.91144	-43.476	-45.6473
2012-11-04 14:29:39	42.76	44.89		6.91838	-43.5882	-45.7594
2012-11-04 14:39:39	42.86	44.98		6.92532	-43.6901	-45.8512	2012-11-04 14:39:39
2012-11-04 14:49:39	42.95	45.08		6.93227	-43.7819	-45.9531
2012-11-04 14:59:39	43	45.13		6.93921	-43.8328	-46.0041
2012-11-04 15:09:39	43.1	45.22		6.94616	-43.9348	-46.0958
2012-11-04 15:19:39	43.2	45.34		6.9531	-44.0367	-46.2181
2012-11-04 15:29:39	42.84	44.98		6.96005	-43.6697	-45.8512
2012-11-04 15:39:39	43.27	45.45		6.96699	-44.1081	-46.3303	2012-11-04 15:39:39
2012-11-04 15:49:39	43.44	45.62		6.97394	-44.2813	-46.5036
2012-11-04 15:59:39	43.52	45.72		6.98088	-44.3629	-46.6055
2012-11-04 16:09:39	43.63	45.81		6.98782	-44.475	-46.6972
2012-11-04 16:19:39	43.73	45.9		6.99477	-44.577	-46.789
2012-11-04 16:29:39	43.84	46.01		7.00171	-44.6891	-46.9011
2012-11-04 16:39:39	43.92	46.1		7.00866	-44.7706	-46.9929	2012-11-04 16:39:39
2012-11-04 16:49:39	44.05	46.2		7.0156	-44.9032	-47.0948
2012-11-04 16:59:39	44.18	46.32		7.02255	-45.0357	-47.2171
2012-11-04 17:09:39	44.3	46.43		7.02949	-45.158	-47.3293
2012-11-04 17:19:39	44.41	46.54		7.03644	-45.2701	-47.4414
2012-11-04 17:29:39	44.54	46.67		7.04338	-45.4027	-47.5739
2012-11-04 17:39:39	44.66	46.79		7.05032	-45.525	-47.6962	2012-11-04 17:39:39
2012-11-04 17:49:39	44.76	46.86		7.05727	-45.6269	-47.7676
2012-11-04 17:59:39	44.86	46.98		7.06421	-45.7288	-47.8899
2012-11-04 18:09:39	44.98	47.1		7.07116	-45.8512	-48.0122
2012-11-04 18:19:39	45.08	47.21		7.0781	-45.9531	-48.1244
2012-11-04 18:29:39	45.22	47.35		7.08505	-46.0958	-48.2671
2012-11-04 18:39:39	45.33	47.48		7.09199	-46.208	-48.3996	2012-11-04 18:39:39
2012-11-04 18:49:39	45.46	47.59		7.09894	-46.3405	-48.5117
2012-11-04 18:59:39	45.57	47.7		7.10588	-46.4526	-48.6239
2012-11-04 19:09:39	45.7	47.82		7.11282	-46.5851	-48.7462
2012-11-04 19:19:39	45.82	47.94		7.11977	-46.7074	-48.8685
2012-11-04 19:29:39	45.96	48.08		7.12671	-46.8502	-49.0112
2012-11-04 19:39:39	45.97	48.1		7.13366	-46.8603	-49.0316	2012-11-04 19:39:39
2012-11-04 19:49:39	46.09	48.2		7.1406	-46.9827	-49.1335
2012-11-04 19:59:39	46.18	48.32		7.14755	-47.0744	-49.2559
2012-11-04 20:09:39	46.31	48.43		7.15449	-47.2069	-49.368
2012-11-04 20:19:39	46.43	48.54		7.16144	-47.3293	-49.4801
2012-11-04 20:29:39	46.54	48.68		7.16838	-47.4414	-49.6228
2012-11-04 20:39:39	46.66	48.8		7.17532	-47.5637	-49.7452	2012-11-04 20:39:39
2012-11-04 20:49:39	46.77	48.92		7.18227	-47.6758	-49.8675
2012-11-04 20:59:39	46.87	49.01		7.18921	-47.7778	-49.9592
2012-11-04 21:09:39	46.98	49.11		7.19616	-47.8899	-50.0612
2012-11-04 21:19:39	47.04	49.2		7.2031	-47.9511	-50.1529
2012-11-04 21:29:39	47.17	49.31		7.21005	-48.0836	-50.265
2012-11-04 21:39:39	47.24	49.39		7.21699	-48.1549	-50.3466	2012-11-04 21:39:39
2012-11-04 21:49:39	47.31	49.5		7.22394	-48.2263	-50.4587
2012-11-04 21:59:39	47.44	49.59		7.23088	-48.3588	-50.5505
2012-11-04 22:09:39	47.55	49.7		7.23782	-48.4709	-50.6626
2012-11-04 22:19:39	47.64	49.79		7.24477	-48.5627	-50.7543
2012-11-04 22:29:39	47.72	49.88		7.25171	-48.6442	-50.8461
2012-11-04 22:39:39	47.83	49.98		7.25866	-48.7564	-50.948	2012-11-04 22:39:39
2012-11-04 22:49:39	47.94	50.11		7.2656	-48.8685	-51.0805
2012-11-04 22:59:39	48.04	50.18		7.27255	-48.9704	-51.1519
2012-11-04 23:09:39	48.15	50.3		7.27949	-49.0826	-51.2742
2012-11-04 23:19:39	48.24	50.4		7.28644	-49.1743	-51.3761
2012-11-04 23:29:39	48.34	50.5		7.29338	-49.2762	-51.4781
2012-11-04 23:39:39	48.45	50.61		7.30032	-49.3884	-51.5902	2012-11-04 23:39:39
2012-11-04 23:49:39	48.55	50.71		7.30727	-49.4903	-51.6922
2012-11-04 23:59:39	48.67	50.83		7.31421	-49.6126	-51.8145
2012-11-05 00:09:39	48.76	50.92		7.32116	-49.7044	-51.9062
2012-11-05 00:19:39	48.86	51.03		7.3281	-49.8063	-52.0183
2012-11-05 00:29:39	48.99	51.15		7.33505	-49.9388	-52.1407
2012-11-05 00:39:39	49.1	51.26		7.34199	-50.051	-52.2528	2012-11-05 00:39:39
2012-11-05 00:49:39	49.18	51.35		7.34894	-50.1325	-52.3445
2012-11-05 00:59:39	49.31	51.48		7.35588	-50.265	-52.4771
2012-11-05 01:09:39	49.42	51.58		7.36282	-50.3772	-52.579
2012-11-05 01:19:39	49.53	51.69		7.36977	-50.4893	-52.6911
2012-11-05 01:29:39	49.63	51.8		7.37671	-50.5912	-52.8033
2012-11-05 01:39:39	49.73	51.91		7.38366	-50.6932	-52.9154	2012-11-05 01:39:39
2012-11-05 01:49:39	49.86	52.02		7.3906	-50.8257	-53.0275
2012-11-05 01:59:39	49.98	52.12		7.39755	-50.948	-53.1295
2012-11-05 02:09:39	50.07	52.24		7.40449	-51.0398	-53.2518
2012-11-05 02:19:39	50.2	52.37		7.41144	-51.1723	-53.3843
2012-11-05 02:29:39	50.33	52.49		7.41838	-51.3048	-53.5066
2012-11-05 02:39:39	50.45	52.61		7.42532	-51.4271	-53.629	2012-11-05 02:39:39
2012-11-05 02:49:39	50.58	52.73		7.43227	-51.5596	-53.7513
2012-11-05 02:59:39	50.68	52.85		7.43921	-51.6616	-53.8736
2012-11-05 03:09:39	50.81	52.96		7.44616	-51.7941	-53.9857
2012-11-05 03:19:39	50.92	53.08		7.4531	-51.9062	-54.1081
2012-11-05 03:29:39	51.04	53.19		7.46005	-52.0285	-54.2202
2012-11-05 03:39:39	51.14	53.3		7.46699	-52.1305	-54.3323	2012-11-05 03:39:39
2012-11-05 03:49:39	51.27	53.42		7.47394	-52.263	-54.4546
2012-11-05 03:59:39	51.39	53.54		7.48088	-52.3853	-54.577
2012-11-05 04:09:39	51.51	53.67		7.48782	-52.5076	-54.7095
2012-11-05 04:19:39	51.63	53.79		7.49477	-52.63	-54.8318
2012-11-05 04:29:39	51.74	53.88		7.50171	-52.7421	-54.9235
2012-11-05 04:39:39	51.85	54.01		7.50866	-52.8542	-55.0561	2012-11-05 04:39:39
2012-11-05 04:49:39	51.95	54.12		7.5156	-52.9562	-55.1682
2012-11-05 04:59:39	52.07	54.25		7.52255	-53.0785	-55.3007
2012-11-05 05:09:39	52.19	54.36		7.52949	-53.2008	-55.4128
2012-11-05 05:19:39	52.32	54.48		7.53644	-53.3333	-55.5352
2012-11-05 05:29:39	52.43	54.6		7.54338	-53.4455	-55.6575
2012-11-05 05:39:39	52.54	54.71		7.55032	-53.5576	-55.7696	2012-11-05 05:39:39
2012-11-05 05:49:39	52.67	54.83		7.55727	-53.6901	-55.8919
2012-11-05 05:59:39	52.79	54.96		7.56421	-53.8124	-56.0245
2012-11-05 06:09:39	52.9	55.07		7.57116	-53.9246	-56.1366
2012-11-05 06:19:39	53	55.18		7.5781	-54.0265	-56.2487
2012-11-05 06:29:39	53.14	55.31		7.58505	-54.1692	-56.3812
2012-11-05 06:39:39	53.26	55.43		7.59199	-54.2915	-56.5036	2012-11-05 06:39:39
2012-11-05 06:49:39	53.39	55.56		7.59894	-54.4241	-56.6361
2012-11-05 06:59:39	53.49	55.66		7.60588	-54.526	-56.738
2012-11-05 07:09:39	53.61	55.8		7.61282	-54.6483	-56.8807
2012-11-05 07:19:39	53.75	55.93		7.61977	-54.791	-57.0133
2012-11-05 07:29:39	53.88	56.06		7.62671	-54.9235	-57.1458
2012-11-05 07:39:39	54	56.18		7.63366	-55.0459	-57.2681	2012-11-05 07:39:39
2012-11-05 07:49:39	54.12	56.29		7.6406	-55.1682	-57.3802
2012-11-05 07:59:39	54.27	56.46		7.64755	-55.3211	-57.5535
2012-11-05 08:09:39	54.4	56.61		7.65449	-55.4536	-57.7064
2012-11-05 08:19:39	54.56	56.73		7.66144	-55.6167	-57.8287
2012-11-05 08:29:39	54.65	56.84		7.66838	-55.7085	-57.9409
2012-11-05 08:39:39	54.78	56.97		7.67532	-55.841	-58.0734	2012-11-05 08:39:39
2012-11-05 08:49:39	54.89	57.08		7.68227	-55.9531	-58.1855
2012-11-05 08:59:39	55.04	57.22		7.68921	-56.106	-58.3282
2012-11-05 09:09:39	55.12	57.33		7.69616	-56.1876	-58.4404
2012-11-05 09:19:39	55.26	57.45		7.7031	-56.3303	-58.5627
2012-11-05 09:29:39	55.36	57.55		7.71005	-56.4322	-58.6646
2012-11-05 09:39:39	55.51	57.7		7.71699	-56.5851	-58.8175	2012-11-05 09:39:39
2012-11-05 09:49:39	55.63	57.83		7.72394	-56.7074	-58.9501
2012-11-05 09:59:39	55.77	57.98		7.73088	-56.8502	-59.103
2012-11-05 10:09:39	55.9	58.11		7.73782	-56.9827	-59.2355
2012-11-05 10:19:39	56.03	58.23		7.74477	-57.1152	-59.3578
2012-11-05 10:29:39	56.15	58.34		7.75171	-57.2375	-59.4699
2012-11-05 10:39:39	56.28	58.47		7.75866	-57.37	-59.6024	2012-11-05 10:39:39
2012-11-05 10:49:39	56.39	58.6		7.7656	-57.4822	-59.735
2012-11-05 10:59:39	56.55	58.75		7.77255	-57.6453	-59.8879
2012-11-05 11:09:39	56.45	58.65		7.77949	-57.5433	-59.7859
2012-11-05 11:19:39	56.74	58.95		7.78644	-57.8389	-60.0917
2012-11-05 11:29:39	56.9	59.06		7.79338	-58.002	-60.2039
2012-11-05 11:39:39	57.02	59.22		7.80032	-58.1244	-60.367	2012-11-05 11:39:39
2012-11-05 11:49:39	57.21	59.38		7.80727	-58.318	-60.5301
2012-11-05 11:59:39	57.32	59.51		7.81421	-58.4302	-60.6626
2012-11-05 12:09:39	57.44	59.62		7.82116	-58.5525	-60.7747
2012-11-05 12:19:39	57.58	59.77		7.8281	-58.6952	-60.9276
2012-11-05 12:29:39	57.76	59.93		7.83505	-58.8787	-61.0907
2012-11-05 12:39:39	57.89	60.06		7.84199	-59.0112	-61.2232	2012-11-05 12:39:39
2012-11-05 12:49:39	58.05	60.23		7.84894	-59.1743	-61.3965
2012-11-05 12:59:39	58.21	60.38		7.85588	-59.3374	-61.5494
2012-11-05 13:09:39	58.37	60.54		7.86282	-59.5005	-61.7125
2012-11-05 13:19:39	58.51	60.68		7.86977	-59.6432	-61.8552
2012-11-05 13:29:39	58.64	60.8		7.87671	-59.7757	-61.9776
2012-11-05 13:39:39	58.79	60.95		7.88366	-59.9286	-62.1305	2012-11-05 13:39:39
2012-11-05 13:49:39	58.98	61.16		7.8906	-60.1223	-62.3445
2012-11-05 13:59:39	59.11	61.28		7.89755	-60.2548	-62.4669
2012-11-05 14:09:39	59.25	61.41		7.90449	-60.3976	-62.5994
2012-11-05 14:19:39	59.41	61.58		7.91144	-60.5607	-62.7727
2012-11-05 14:29:39	59.57	61.74		7.91838	-60.7238	-62.9358
2012-11-05 14:39:39	59.71	61.89		7.92532	-60.8665	-63.0887	2012-11-05 14:39:39
2012-11-05 14:49:39	59.88	62.05		7.93227	-61.0398	-63.2518
2012-11-05 14:59:39	60.04	62.22		7.93921	-61.2029	-63.4251
2012-11-05 15:09:39	60.18	62.34		7.94616	-61.3456	-63.5474
2012-11-05 15:19:39	60.35	62.54		7.9531	-61.5189	-63.7513
2012-11-05 15:29:39	59.85	62.96		7.96005	-61.0092	-64.1794
2012-11-05 15:39:39	60.42	62.66		7.96699	-61.5902	-63.8736	2012-11-05 15:39:39
2012-11-05 15:49:39	60.71	62.95		7.97394	-61.8858	-64.1692
2012-11-05 15:59:39	60.85	63.08		7.98088	-62.0285	-64.3017
2012-11-05 16:09:39	61.03	63.25		7.98782	-62.212	-64.475
2012-11-05 16:19:39	61.19	63.39		7.99477	-62.3751	-64.6177
2012-11-05 16:29:39	61.38	63.57		8.00171	-62.5688	-64.8012
2012-11-05 16:39:39	61.53	63.71		8.00866	-62.7217	-64.9439	2012-11-05 16:39:39
2012-11-05 16:49:39	61.76	63.91		8.0156	-62.9562	-65.1478
2012-11-05 16:59:39	61.93	64.09		8.02255	-63.1295	-65.3313
2012-11-05 17:09:39	62.13	64.28		8.02949	-63.3333	-65.525
2012-11-05 17:19:39	62.3	64.43		8.03644	-63.5066	-65.6779
2012-11-05 17:29:39	62.42	64.57		8.04338	-63.629	-65.8206
2012-11-05 17:39:39	62.58	64.77		8.05032	-63.792	-66.0245	2012-11-05 17:39:39
2012-11-05 17:49:39	62.8	64.93		8.05727	-64.0163	-66.1876
2012-11-05 17:59:39	62.98	65.16		8.06421	-64.1998	-66.422
2012-11-05 18:09:39	63.16	65.33		8.07116	-64.3833	-66.5953
2012-11-05 18:19:39	63.33	65.48		8.0781	-64.5566	-66.7482
2012-11-05 18:29:39	63.49	65.66		8.08505	-64.7197	-66.9317
2012-11-05 18:39:39	63.66	65.85		8.09199	-64.893	-67.1254	2012-11-05 18:39:39
2012-11-05 18:49:39	63.84	66.03		8.09894	-65.0765	-67.3089
2012-11-05 18:59:39	64.04	66.22		8.10588	-65.2803	-67.5025
2012-11-05 19:09:39	64.2	66.35		8.11282	-65.4434	-67.6351
2012-11-05 19:19:39	64.38	66.58		8.11977	-65.6269	-67.8695
2012-11-05 19:29:39	64.56	66.75		8.12671	-65.8104	-68.0428
2012-11-05 19:39:39	64.76	66.95		8.13366	-66.0143	-68.2467	2012-11-05 19:39:39
2012-11-05 19:49:39	64.93	67.12		8.1406	-66.1876	-68.42
2012-11-05 19:59:39	65.12	67.31		8.14755	-66.3812	-68.6137
2012-11-05 20:09:39	65.21	67.39		8.15449	-66.473	-68.6952
2012-11-05 20:19:39	65.46	67.64		8.16144	-66.7278	-68.9501
2012-11-05 20:29:39	65.61	67.81		8.16838	-66.8807	-69.1233
2012-11-05 20:39:39	65.81	67.99		8.17532	-67.0846	-69.3068	2012-11-05 20:39:39
2012-11-05 20:49:39	65.98	68.15		8.18227	-67.2579	-69.4699
2012-11-05 20:59:39	66.14	68.34		8.18921	-67.421	-69.6636
2012-11-05 21:09:39	66.33	68.52		8.19616	-67.6147	-69.8471
2012-11-05 21:19:39	66.5	68.67		8.2031	-67.788	-70
2012-11-05 21:29:39	66.68	68.88		8.21005	-67.9715	-70.2141
2012-11-05 21:39:39	66.83	69.01		8.21699	-68.1244	-70.3466	2012-11-05 21:39:39
2012-11-05 21:49:39	67.01	69.2		8.22394	-68.3078	-70.5403
2012-11-05 21:59:39	67.21	69.41		8.23088	-68.5117	-70.7543
2012-11-05 22:09:39	67.4	69.6		8.23782	-68.7054	-70.948
2012-11-05 22:19:39	67.61	69.8		8.24477	-68.9195	-71.1519
2012-11-05 22:29:39	67.76	69.94		8.25171	-69.0724	-71.2946
2012-11-05 22:39:39	67.95	70.12		8.25866	-69.2661	-71.4781	2012-11-05 22:39:39
2012-11-05 22:49:39	68.12	70.3		8.2656	-69.4393	-71.6616
2012-11-05 22:59:39	68.3	70.49		8.27255	-69.6228	-71.8552
2012-11-05 23:09:39	68.49	70.69		8.27949	-69.8165	-72.0591
2012-11-05 23:19:39	68.69	70.87		8.28644	-70.0204	-72.2426
2012-11-05 23:29:39	68.86	71.05		8.29338	-70.1937	-72.4261
2012-11-05 23:39:39	69.03	71.23		8.30032	-70.367	-72.6096	2012-11-05 23:39:39
2012-11-05 23:49:39	69.23	71.45		8.30727	-70.5708	-72.8338
2012-11-05 23:59:39	69.42	71.63		8.31421	-70.7645	-73.0173
2012-11-06 00:09:39	69.6	71.8		8.32116	-70.948	-73.1906
2012-11-06 00:19:39	69.79	71.99		8.3281	-71.1417	-73.3843
2012-11-06 00:29:39	69.95	72.14		8.33505	-71.3048	-73.5372
2012-11-06 00:39:39	70.17	72.36		8.34199	-71.5291	-73.7615	2012-11-06 00:39:39
2012-11-06 00:49:39	70.37	72.58		8.34894	-71.7329	-73.9857
2012-11-06 00:59:39	70.54	72.76		8.35588	-71.9062	-74.1692
2012-11-06 01:09:39	70.72	72.92		8.36282	-72.0897	-74.3323
2012-11-06 01:19:39	70.93	73.15		8.36977	-72.3038	-74.5668
2012-11-06 01:29:39	71.15	73.36		8.37671	-72.528	-74.7808
2012-11-06 01:39:39	71.33	73.55		8.38366	-72.7115	-74.9745	2012-11-06 01:39:39
2012-11-06 01:49:39	71.54	73.75		8.3906	-72.9256	-75.1784
2012-11-06 01:59:39	71.73	73.96		8.39755	-73.1193	-75.3925
2012-11-06 02:09:39	71.92	74.14		8.40449	-73.3129	-75.5759
2012-11-06 02:19:39	72.12	74.33		8.41144	-73.5168	-75.7696
2012-11-06 02:29:39	72.32	74.54		8.41838	-73.7207	-75.9837
2012-11-06 02:39:39	72.54	74.77		8.42532	-73.945	-76.2181	2012-11-06 02:39:39
2012-11-06 02:49:39	72.72	74.94		8.43227	-74.1284	-76.3914
2012-11-06 02:59:39	72.94	75.16		8.43921	-74.3527	-76.6157
2012-11-06 03:09:39	73.15	75.38		8.44616	-74.5668	-76.84
2012-11-06 03:19:39	73.34	75.56		8.4531	-74.7604	-77.0234
2012-11-06 03:29:39	73.51	75.76		8.46005	-74.9337	-77.2273
2012-11-06 03:39:39	73.71	75.94		8.46699	-75.1376	-77.4108	2012-11-06 03:39:39
2012-11-06 03:49:39	73.94	76.16		8.47394	-75.3721	-77.6351
2012-11-06 03:59:39	74.14	76.34		8.48088	-75.5759	-77.8186
2012-11-06 04:09:39	74.33	76.56		8.48782	-75.7696	-78.0428
2012-11-06 04:19:39	74.52	76.76		8.49477	-75.9633	-78.2467
2012-11-06 04:29:39	74.68	76.93		8.50171	-76.1264	-78.42
2012-11-06 04:39:39	74.91	77.14		8.50866	-76.3609	-78.634	2012-11-06 04:39:39
2012-11-06 04:49:39	75.13	77.37		8.5156	-76.5851	-78.8685
2012-11-06 04:59:39	75.31	77.53		8.52255	-76.7686	-79.0316
2012-11-06 05:09:39	75.52	77.76		8.52949	-76.9827	-79.2661
2012-11-06 05:19:39	75.72	77.96		8.53644	-77.1865	-79.4699
2012-11-06 05:29:39	75.91	78.14		8.54338	-77.3802	-79.6534
2012-11-06 05:39:39	76.11	78.32		8.55032	-77.5841	-79.8369	2012-11-06 05:39:39
2012-11-06 05:49:39	76.32	78.55		8.55727	-77.7982	-80.0714
2012-11-06 05:59:39	76.52	78.72		8.56421	-78.002	-80.2446
2012-11-06 06:09:39	76.7	78.96		8.57116	-78.1855	-80.4893
2012-11-06 06:19:39	76.87	79.12		8.5781	-78.3588	-80.6524
2012-11-06 06:29:39	77.11	79.32		8.58505	-78.6035	-80.8563
2012-11-06 06:39:39	77.3	79.54		8.59199	-78.7971	-81.0805	2012-11-06 06:39:39
2012-11-06 06:49:39	77.51	79.73		8.59894	-79.0112	-81.2742
2012-11-06 06:59:39	77.71	79.96		8.60588	-79.2151	-81.5087
2012-11-06 07:09:39	77.93	80.15		8.61282	-79.4393	-81.7023
2012-11-06 07:19:39	78.11	80.39		8.61977	-79.6228	-81.947
2012-11-06 07:29:39	78.34	80.57		8.62671	-79.8573	-82.1305
2012-11-06 07:39:39	78.56	80.8		8.63366	-80.0815	-82.3649	2012-11-06 07:39:39
2012-11-06 07:49:39	78.75	81		8.6406	-80.2752	-82.5688
2012-11-06 07:59:39	78.97	81.22		8.64755	-80.4995	-82.7931
2012-11-06 08:09:39	79.16	81.4		8.65449	-80.6932	-82.9766
2012-11-06 08:19:39	79.34	81.63		8.66144	-80.8767	-83.211
2012-11-06 08:29:39	79.55	81.85		8.66838	-81.0907	-83.4353
2012-11-06 08:39:39	79.78	82.04		8.67532	-81.3252	-83.629	2012-11-06 08:39:39
2012-11-06 08:49:39	79.94	82.22		8.68227	-81.4883	-83.8124
2012-11-06 08:59:39	80.17	82.42		8.68921	-81.7227	-84.0163
2012-11-06 09:09:39	80.36	82.65		8.69616	-81.9164	-84.2508
2012-11-06 09:19:39	80.59	82.86		8.7031	-82.1509	-84.4648
2012-11-06 09:29:39	80.79	83.06		8.71005	-82.3547	-84.6687
2012-11-06 09:39:39	81.03	83.29		8.71699	-82.5994	-84.9032	2012-11-06 09:39:39
2012-11-06 09:49:39	81.22	83.47		8.72394	-82.7931	-85.0866
2012-11-06 09:59:39	81.41	83.72		8.73088	-82.9867	-85.3415
2012-11-06 10:09:39	81.61	83.88		8.73782	-83.1906	-85.5046
2012-11-06 10:19:39	81.83	84.11		8.74477	-83.4149	-85.739
2012-11-06 10:29:39	82.03	84.34		8.75171	-83.6188	-85.9735
2012-11-06 10:39:39	82.23	84.53		8.75866	-83.8226	-86.1672	2012-11-06 10:39:39
2012-11-06 10:49:39	82.44	84.75		8.7656	-84.0367	-86.3914
2012-11-06 10:59:39	82.66	84.97		8.77255	-84.261	-86.6157
2012-11-06 11:09:39	82.84	85.16		8.77949	-84.4444	-86.8094
2012-11-06 11:19:39	83.05	85.34		8.78644	-84.6585	-86.9929
2012-11-06 11:29:39	82.96	85.4		8.79338	-84.5668	-87.054
2012-11-06 11:39:39	83.31	85.64		8.80032	-84.9235	-87.2987	2012-11-06 11:39:39
2012-11-06 11:49:39	83.49	85.73		8.80727	-85.107	-87.3904
2012-11-06 11:59:39	83.66	86.03		8.81421	-85.2803	-87.6962
2012-11-06 12:09:39	83.87	86.2		8.82116	-85.4944	-87.8695
2012-11-06 12:19:39	84.07	86.41		8.8281	-85.6983	-88.0836
2012-11-06 12:29:39	84.27	86.59		8.83505	-85.9021	-88.2671
2012-11-06 12:39:39	84.49	86.81		8.84199	-86.1264	-88.4913	2012-11-06 12:39:39
2012-11-06 12:49:39	84.67	87.01		8.84894	-86.3099	-88.6952
2012-11-06 12:59:39	84.89	87.23		8.85588	-86.5341	-88.9195
2012-11-06 13:09:39	85.08	87.44		8.86282	-86.7278	-89.1335
2012-11-06 13:19:39	85.22	87.61		8.86977	-86.8705	-89.3068
2012-11-06 13:29:39	85.45	87.8		8.87671	-87.105	-89.5005
2012-11-06 13:39:39	85.63	87.98		8.88366	-87.2885	-89.684	2012-11-06 13:39:39
2012-11-06 13:49:39	85.8	88.15		8.8906	-87.4618	-89.8573
2012-11-06 13:59:39	85.98	88.35		8.89755	-87.6453	-90.0612
2012-11-06 14:09:39	86.2	88.55		8.90449	-87.8695	-90.265
2012-11-06 14:19:39	86.38	88.72		8.91144	-88.053	-90.4383
2012-11-06 14:29:39	86.57	88.93		8.91838	-88.2467	-90.6524
2012-11-06 14:39:39	86.73	89.09		8.92532	-88.4098	-90.8155	2012-11-06 14:39:39
2012-11-06 14:49:39	86.93	89.31		8.93227	-88.6137	-91.0398
2012-11-06 14:59:39	87.11	89.47		8.93921	-88.7971	-91.2029
2012-11-06 15:09:39	87.3	89.67		8.94616	-88.9908	-91.4067
2012-11-06 15:19:39	87.49	89.85		8.9531	-89.1845	-91.5902
2012-11-06 15:29:39	87.7	90.07		8.96005	-89.3986	-91.8145
2012-11-06 15:39:39	87.9	90.26		8.96699	-89.6024	-92.0082	2012-11-06 15:39:39
2012-11-06 15:49:39	88.12	90.5		8.97394	-89.8267	-92.2528
2012-11-06 15:59:39	88.37	90.7		8.98088	-90.0815	-92.4567
2012-11-06 16:09:39	88.54	90.92		8.98782	-90.2548	-92.6809
2012-11-06 16:19:39	88.76	91.12		8.99477	-90.4791	-92.8848
2012-11-06 16:29:39	88.97	91.34		9.00171	-90.6932	-93.1091
2012-11-06 16:39:39	89.21	91.63		9.00866	-90.9378	-93.4047	2012-11-06 16:39:39
2012-11-06 16:49:39	89.49	91.94		9.0156	-91.2232	-93.7207
2012-11-06 16:59:39	89.32	91.85		9.02255	-91.0499	-93.629
2012-11-06 17:09:39	89.82	92.35		9.02949	-91.5596	-94.1386
2012-11-06 17:19:39	90.16	92.69		9.03644	-91.9062	-94.4852
2012-11-06 17:29:39	90.43	92.92		9.04338	-92.1814	-94.7197
2012-11-06 17:39:39	90.71	93.16		9.05032	-92.4669	-94.9643	2012-11-06 17:39:39
2012-11-06 17:49:39	90.94	93.39		9.05727	-92.7013	-95.1988
2012-11-06 17:59:39	91.18	93.61		9.06421	-92.946	-95.423
2012-11-06 18:09:39	91.43	93.85		9.07116	-93.2008	-95.6677
2012-11-06 18:19:39	91.69	94.1		9.0781	-93.4659	-95.9225
2012-11-06 18:29:39	91.93	94.33		9.08505	-93.7105	-96.157
2012-11-06 18:39:39	92.18	94.61		9.09199	-93.9653	-96.4424	2012-11-06 18:39:39
2012-11-06 18:49:39	92.45	94.83		9.09894	-94.2406	-96.6667
2012-11-06 18:59:39	92.66	95.1		9.10588	-94.4546	-96.9419
2012-11-06 19:09:39	92.9	95.34		9.11282	-94.6993	-97.1865
2012-11-06 19:19:39	93.18	95.6		9.11977	-94.9847	-97.4516
2012-11-06 19:29:39	93.46	95.87		9.12671	-95.2701	-97.7268
2012-11-06 19:39:39	93.72	96.12		9.13366	-95.5352	-97.9817	2012-11-06 19:39:39
2012-11-06 19:49:39	93.94	96.39		9.1406	-95.7594	-98.2569
2012-11-06 19:59:39	94.21	96.61		9.14755	-96.0347	-98.4811
2012-11-06 20:09:39	94.42	96.92		9.15449	-96.2487	-98.7971
2012-11-06 20:19:39	94.78	97.21		9.16144	-96.6157	-99.0928
2012-11-06 20:29:39	95.09	97.55		9.16838	-96.9317	-99.4393
2012-11-06 20:39:39	95.3	97.8		9.17532	-97.1458	-99.6942	2012-11-06 20:39:39
2012-11-06 20:49:39	95.59	98.02		9.18227	-97.4414	-99.9185
2012-11-06 20:59:39	95.77	98.32		9.18921	-97.6249	-100.224
2012-11-06 21:09:39	96.1	98.57		9.19616	-97.9613	-100.479
2012-11-06 21:19:39	96.34	98.82		9.2031	-98.2059	-100.734
2012-11-06 21:29:39	96.62	99.1		9.21005	-98.4913	-101.019
2012-11-06 21:39:39	96.88	99.35		9.21699	-98.7564	-101.274	2012-11-06 21:39:39
2012-11-06 21:49:39	97.1	99.61		9.22394	-98.9806	-101.539
2012-11-06 21:59:39	97.34	99.81		9.23088	-99.2253	-101.743
2012-11-06 22:09:39	97.58	100.06		9.23782	-99.4699	-101.998
2012-11-06 22:19:39	97.86	100.35		9.24477	-99.7554	-102.294
2012-11-06 22:29:39	98.09	100.61		9.25171	-99.9898	-102.559
2012-11-06 22:39:39	98.34	100.85		9.25866	-100.245	-102.803	2012-11-06 22:39:39
2012-11-06 22:49:39	98.6	101.16		9.2656	-100.51	-103.119
2012-11-06 22:59:39	98.87	101.39		9.27255	-100.785	-103.354
2012-11-06 23:09:39	99.15	101.69		9.27949	-101.07	-103.66
2012-11-06 23:19:39	99.42	101.64		9.28644	-101.346	-103.609
2012-11-06 23:29:39	99.68	102.18		9.29338	-101.611	-104.159
2012-11-06 23:39:39	99.96	102.5		9.30032	-101.896	-104.485	2012-11-06 23:39:39
2012-11-06 23:49:39	100.2	102.76		9.30727	-102.141	-104.75
2012-11-06 23:59:39	100.48	103.02		9.31421	-102.426	-105.015
2012-11-07 00:09:39	100.77	103.3		9.32116	-102.722	-105.301
2012-11-07 00:19:39	101.02	103.5		9.3281	-102.977	-105.505
2012-11-07 00:29:39	101.21	103.78		9.33505	-103.17	-105.79
2012-11-07 00:39:39	101.47	104.03		9.34199	-103.435	-106.045	2012-11-07 00:39:39
2012-11-07 00:49:39	101.73	104.25		9.34894	-103.7	-106.269
2012-11-07 00:59:39	101.96	104.49		9.35588	-103.935	-106.514
2012-11-07 01:09:39	102.17	104.7		9.36282	-104.149	-106.728
2012-11-07 01:19:39	102.41	104.98		9.36977	-104.393	-107.013
2012-11-07 01:29:39	102.64	105.17		9.37671	-104.628	-107.207
2012-11-07 01:39:39	102.89	105.48		9.38366	-104.883	-107.523	2012-11-07 01:39:39
2012-11-07 01:49:39	103.15	105.67		9.3906	-105.148	-107.717
2012-11-07 01:59:39	103.35	105.95		9.39755	-105.352	-108.002
2012-11-07 02:09:39	103.64	106.22		9.40449	-105.647	-108.277
2012-11-07 02:19:39	103.87	106.42		9.41144	-105.882	-108.481
2012-11-07 02:29:39	104.13	106.71		9.41838	-106.147	-108.777
2012-11-07 02:39:39	104.37	106.97		9.42532	-106.391	-109.042	2012-11-07 02:39:39
2012-11-07 02:49:39	104.6	107.24		9.43227	-106.626	-109.317
2012-11-07 02:59:39	104.8	107.5		9.43921	-106.83	-109.582
2012-11-07 03:09:39	105.1	107.75		9.44616	-107.136	-109.837
2012-11-07 03:19:39	105.36	108.02		9.4531	-107.401	-110.112
2012-11-07 03:29:39	105.64	108.28		9.46005	-107.686	-110.377
2012-11-07 03:39:39	105.91	108.55		9.46699	-107.961	-110.652	2012-11-07 03:39:39
2012-11-07 03:49:39	106.12	108.81		9.47394	-108.175	-110.917
2012-11-07 03:59:39	106.37	109.08		9.48088	-108.43	-111.193
2012-11-07 04:09:39	106.66	109.34		9.48782	-108.726	-111.458
2012-11-07 04:19:39	106.89	109.56		9.49477	-108.96	-111.682
2012-11-07 04:29:39	107.13	109.83		9.50171	-109.205	-111.957
2012-11-07 04:39:39	107.42	110.13		9.50866	-109.501	-112.263	2012-11-07 04:39:39
2012-11-07 04:49:39	107.65	110.33		9.5156	-109.735	-112.467
2012-11-07 04:59:39	107.95	110.69		9.52255	-110.041	-112.834
2012-11-07 05:09:39	108.21	110.96		9.52949	-110.306	-113.109
2012-11-07 05:19:39	108.5	111.23		9.53644	-110.601	-113.384
2012-11-07 05:29:39	108.69	111.44		9.54338	-110.795	-113.598
2012-11-07 05:39:39	108.98	111.68		9.55032	-111.091	-113.843	2012-11-07 05:39:39
2012-11-07 05:49:39	109.24	111.96		9.55727	-111.356	-114.128
2012-11-07 05:59:39	109.46	112.24		9.56421	-111.58	-114.414
2012-11-07 06:09:39	109.74	112.48		9.57116	-111.865	-114.659
2012-11-07 06:19:39	110.01	112.77		9.5781	-112.141	-114.954
2012-11-07 06:29:39	110.25	113.01		9.58505	-112.385	-115.199
2012-11-07 06:39:39	110.53	113.32		9.59199	-112.671	-115.515	2012-11-07 06:39:39
2012-11-07 06:49:39	110.8	113.57		9.59894	-112.946	-115.77
2012-11-07 06:59:39	111.05	113.84		9.60588	-113.201	-116.045
2012-11-07 07:09:39	111.34	114.04		9.61282	-113.496	-116.249
2012-11-07 07:19:39	111.56	114.32		9.61977	-113.721	-116.534
2012-11-07 07:29:39	111.81	114.59		9.62671	-113.976	-116.809
2012-11-07 07:39:39	112.03	114.81		9.63366	-114.2	-117.034	2012-11-07 07:39:39
2012-11-07 07:49:39	112.28	115.05		9.6406	-114.455	-117.278
2012-11-07 07:59:39	112.55	115.29		9.64755	-114.73	-117.523
2012-11-07 08:09:39	112.74	115.51		9.65449	-114.924	-117.747
2012-11-07 08:19:39	112.96	115.75		9.66144	-115.148	-117.992
2012-11-07 08:29:39	113.15	115.92		9.66838	-115.341	-118.165
2012-11-07 08:39:39	113.35	116.17		9.67532	-115.545	-118.42	2012-11-07 08:39:39
2012-11-07 08:49:39	113.58	116.44		9.68227	-115.78	-118.695
2012-11-07 08:59:39	113.8	116.63		9.68921	-116.004	-118.889
2012-11-07 09:09:39	113.93	116.8		9.69616	-116.137	-119.062
2012-11-07 09:19:39	114.19	117.01		9.7031	-116.402	-119.276
2012-11-07 09:29:39	114.4	117.24		9.71005	-116.616	-119.511
2012-11-07 09:39:39	114.62	117.48		9.71699	-116.84	-119.755	2012-11-07 09:39:39
2012-11-07 09:49:39	114.87	117.73		9.72394	-117.095	-120.01
2012-11-07 09:59:39	115.1	117.96		9.73088	-117.329	-120.245
2012-11-07 10:09:39	115.23	118.17		9.73782	-117.462	-120.459
2012-11-07 10:19:39	115.51	118.39		9.74477	-117.747	-120.683
2012-11-07 10:29:39	115.73	118.59		9.75171	-117.971	-120.887
2012-11-07 10:39:39	115.99	118.87		9.75866	-118.236	-121.172	2012-11-07 10:39:39
2012-11-07 10:49:39	116.23	119.13		9.7656	-118.481	-121.437
2012-11-07 10:59:39	116.45	119.36		9.77255	-118.705	-121.672
2012-11-07 11:09:39	116.64	119.56		9.77949	-118.899	-121.876
2012-11-07 11:19:39	116.88	119.79		9.78644	-119.144	-122.11
2012-11-07 11:29:39	117.08	120.01		9.79338	-119.348	-122.334
2012-11-07 11:39:39	117.29	120.27		9.80032	-119.562	-122.599	2012-11-07 11:39:39
2012-11-07 11:49:39	117.59	120.58		9.80727	-119.867	-122.915
2012-11-07 11:59:39	117.83	120.79		9.81421	-120.112	-123.129
2012-11-07 12:09:39	118.03	120.98		9.82116	-120.316	-123.323
2012-11-07 12:19:39	118.28	121.26		9.8281	-120.571	-123.609
2012-11-07 12:29:39	118.5	121.45		9.83505	-120.795	-123.802
2012-11-07 12:39:39	118.76	121.72		9.84199	-121.06	-124.077	2012-11-07 12:39:39
2012-11-07 12:49:39	118.99	121.98		9.84894	-121.295	-124.343
2012-11-07 12:59:39	119.27	122.26		9.85588	-121.58	-124.628
2012-11-07 13:09:39	119.54	122.57		9.86282	-121.855	-124.944
2012-11-07 13:19:39	119.82	122.85		9.86977	-122.141	-125.229
2012-11-07 13:29:39	120.12	123.15		9.87671	-122.446	-125.535
2012-11-07 13:39:39	120.4	123.45		9.88366	-122.732	-125.841	2012-11-07 13:39:39
2012-11-07 13:49:39	120.67	123.75		9.8906	-123.007	-126.147
2012-11-07 13:59:39	120.96	124.02		9.89755	-123.303	-126.422
2012-11-07 14:09:39	121.26	124.31		9.90449	-123.609	-126.718
2012-11-07 14:19:39	121.52	124.6		9.91144	-123.874	-127.013
2012-11-07 14:29:39	121.79	124.86		9.91838	-124.149	-127.278
2012-11-07 14:39:39	122.06	125.14		9.92532	-124.424	-127.564	2012-11-07 14:39:39
2012-11-07 14:49:39	122.34	125.44		9.93227	-124.709	-127.87
2012-11-07 14:59:39	122.65	125.79		9.93921	-125.025	-128.226
2012-11-07 15:09:39	122.97	126.09		9.94616	-125.352	-128.532
2012-11-07 15:19:39	123.24	126.39		9.9531	-125.627	-128.838
2012-11-07 15:29:39	123.52	126.66		9.96005	-125.912	-129.113
2012-11-07 15:39:39	123.82	126.99		9.96699	-126.218	-129.45	2012-11-07 15:39:39
2012-11-07 15:49:39	124.11	127.28		9.97394	-126.514	-129.745
2012-11-07 15:59:39	124.41	127.58		9.98088	-126.82	-130.051
2012-11-07 16:09:39	124.67	127.9		9.98782	-127.085	-130.377
2012-11-07 16:19:39	125.01	128.21		9.99477	-127.431	-130.693
2012-11-07 16:29:39	125.27	128.46		10.0017	-127.696	-130.948
2012-11-07 16:39:39	125.57	128.78		10.0087	-128.002	-131.274	2012-11-07 16:39:39
2012-11-07 16:49:39	125.84	129.21		10.0156	-128.277	-131.713
2012-11-07 16:59:39	125.45	128.78		10.0225	-127.88	-131.274
2012-11-07 17:09:39	126.18	129.54		10.0295	-128.624	-132.049
2012-11-07 17:19:39	126.54	129.97		10.0364	-128.991	-132.487
2012-11-07 17:29:39	126.89	130.38		10.0434	-129.348	-132.905
2012-11-07 17:39:39	127.23	130.67		10.0503	-129.694	-133.201	2012-11-07 17:39:39
2012-11-07 17:49:39	127.59	130.97		10.0573	-130.061	-133.507
2012-11-07 17:59:39	127.94	131.33		10.0642	-130.418	-133.874
2012-11-07 18:09:39	128.28	131.67		10.0712	-130.765	-134.22
2012-11-07 18:19:39	128.59	132.09		10.0781	-131.081	-134.648
2012-11-07 18:29:39	128.97	132.45		10.085	-131.468	-135.015
2012-11-07 18:39:39	129.31	132.81		10.092	-131.814	-135.382	2012-11-07 18:39:39
2012-11-07 18:49:39	129.68	133.11		10.0989	-132.192	-135.688
2012-11-07 18:59:39	129.9	133.52		10.1059	-132.416	-136.106
2012-11-07 19:09:39	130.29	133.85		10.1128	-132.813	-136.442
2012-11-07 19:19:39	130.65	134.27		10.1198	-133.18	-136.871
2012-11-07 19:29:39	131.01	134.59		10.1267	-133.547	-137.197
2012-11-07 19:39:39	131.37	134.88		10.1337	-133.914	-137.492	2012-11-07 19:39:39
2012-11-07 19:49:39	131.68	135.17		10.1406	-134.23	-137.788
2012-11-07 19:59:39	131.99	135.44		10.1475	-134.546	-138.063
2012-11-07 20:09:39	132.28	135.81		10.1545	-134.842	-138.44
2012-11-07 20:19:39	132.61	136.2		10.1614	-135.178	-138.838
2012-11-07 20:29:39	132.94	136.59		10.1684	-135.515	-139.235
2012-11-07 20:39:39	133.29	136.94		10.1753	-135.872	-139.592	2012-11-07 20:39:39
2012-11-07 20:49:39	133.65	137.3		10.1823	-136.239	-139.959
2012-11-07 20:59:39	134.01	137.79		10.1892	-136.606	-140.459
2012-11-07 21:09:39	134.41	138.2		10.1962	-137.013	-140.877
2012-11-07 21:19:39	134.74	138.53		10.2031	-137.35	-141.213
2012-11-07 21:29:39	135.14	138.9		10.21	-137.757	-141.59
2012-11-07 21:39:39	135.48	139.23		10.217	-138.104	-141.927	2012-11-07 21:39:39
2012-11-07 21:49:39	135.85	139.59		10.2239	-138.481	-142.294
2012-11-07 21:59:39	136.19	140		10.2309	-138.828	-142.712
2012-11-07 22:09:39	136.52	140.39		10.2378	-139.164	-143.109
2012-11-07 22:19:39	136.9	140.85		10.2448	-139.551	-143.578
2012-11-07 22:29:39	137.24	141.08		10.2517	-139.898	-143.812
2012-11-07 22:39:39	137.62	141.5		10.2587	-140.285	-144.241	2012-11-07 22:39:39
2012-11-07 22:49:39	137.94	141.91		10.2656	-140.612	-144.659
2012-11-07 22:59:39	138.32	142.36		10.2725	-140.999	-145.117
2012-11-07 23:09:39	138.67	142.7		10.2795	-141.356	-145.464
2012-11-07 23:19:39	139.02	143.07		10.2864	-141.713	-145.841
2012-11-07 23:29:39	139.39	143.52		10.2934	-142.09	-146.3
2012-11-07 23:39:39	139.77	143.91		10.3003	-142.477	-146.697	2012-11-07 23:39:39
2012-11-07 23:49:39	140.09	144.25		10.3073	-142.803	-147.044
2012-11-07 23:59:39	140.44	144.63		10.3142	-143.16	-147.431
2012-11-08 00:09:39	140.82	144.96		10.3212	-143.547	-147.768
2012-11-08 00:19:39	141.17	145.4		10.3281	-143.904	-148.216
2012-11-08 00:29:39	141.44	145.79		10.335	-144.179	-148.614
2012-11-08 00:39:39	141.89	146.21		10.342	-144.638	-149.042	2012-11-08 00:39:39
2012-11-08 00:49:39	142.26	146.59		10.3489	-145.015	-149.429
2012-11-08 00:59:39	142.63	146.97		10.3559	-145.392	-149.817
2012-11-08 01:09:39	142.97	147.39		10.3628	-145.739	-150.245
2012-11-08 01:19:39	143.34	147.78		10.3698	-146.116	-150.642
2012-11-08 01:29:39	143.68	148.2		10.3767	-146.463	-151.07
2012-11-08 01:39:39	144.02	148.54		10.3837	-146.809	-151.417	2012-11-08 01:39:39
2012-11-08 01:49:39	144.41	148.91		10.3906	-147.207	-151.794
2012-11-08 01:59:39	144.78	149.36		10.3975	-147.584	-152.253
2012-11-08 02:09:39	145.14	149.72		10.4045	-147.951	-152.62
2012-11-08 02:19:39	145.49	150.19		10.4114	-148.308	-153.099
2012-11-08 02:29:39	145.86	150.54		10.4184	-148.685	-153.456
2012-11-08 02:39:39	146.22	150.92		10.4253	-149.052	-153.843	2012-11-08 02:39:39
2012-11-08 02:49:39	146.59	151.33		10.4323	-149.429	-154.261
2012-11-08 02:59:39	146.95	151.72		10.4392	-149.796	-154.659
2012-11-08 03:09:39	147.33	152.13		10.4462	-150.183	-155.076
2012-11-08 03:19:39	147.69	152.49		10.4531	-150.55	-155.443
2012-11-08 03:29:39	148.06	152.94		10.46	-150.928	-155.902
2012-11-08 03:39:39	148.36	153.33		10.467	-151.233	-156.3	2012-11-08 03:39:39
2012-11-08 03:49:39	148.77	153.76		10.4739	-151.651	-156.738
2012-11-08 03:59:39	149.13	154.15		10.4809	-152.018	-157.136
2012-11-08 04:09:39	149.45	154.45		10.4878	-152.345	-157.441
2012-11-08 04:19:39	149.86	154.96		10.4948	-152.762	-157.961
2012-11-08 04:29:39	150.21	155.35		10.5017	-153.119	-158.359
2012-11-08 04:39:39	150.57	155.77		10.5087	-153.486	-158.787	2012-11-08 04:39:39
2012-11-08 04:49:39	150.9	156.12		10.5156	-153.823	-159.144
2012-11-08 04:59:39	151.27	156.56		10.5225	-154.2	-159.592
2012-11-08 05:09:39	151.65	156.93		10.5295	-154.587	-159.969
2012-11-08 05:19:39	151.97	157.31		10.5364	-154.913	-160.357
2012-11-08 05:29:39	152.33	157.69		10.5434	-155.28	-160.744
2012-11-08 05:39:39	152.66	158.04		10.5503	-155.617	-161.101	2012-11-08 05:39:39
2012-11-08 05:49:39	153.01	158.42		10.5573	-155.973	-161.488
2012-11-08 05:59:39	153.35	158.85		10.5642	-156.32	-161.927
2012-11-08 06:09:39	153.69	159.25		10.5712	-156.667	-162.334
2012-11-08 06:19:39	154.02	159.63		10.5781	-157.003	-162.722
2012-11-08 06:29:39	154.36	160		10.585	-157.35	-163.099
2012-11-08 06:39:39	154.7	160.4		10.592	-157.696	-163.507	2012-11-08 06:39:39
2012-11-08 06:49:39	155.02	160.74		10.5989	-158.022	-163.853
2012-11-08 06:59:39	155.37	161.15		10.6059	-158.379	-164.271
2012-11-08 07:09:39	155.68	161.43		10.6128	-158.695	-164.557
2012-11-08 07:19:39	155.99	161.73		10.6198	-159.011	-164.862
2012-11-08 07:29:39	156.3	162.09		10.6267	-159.327	-165.229
2012-11-08 07:39:39	156.6	162.46		10.6337	-159.633	-165.607	2012-11-08 07:39:39
2012-11-08 07:49:39	156.93	162.81		10.6406	-159.969	-165.963
2012-11-08 07:59:39	157.18	163.14		10.6475	-160.224	-166.3
2012-11-08 08:09:39	157.51	163.46		10.6545	-160.561	-166.626
2012-11-08 08:19:39	157.78	163.76		10.6614	-160.836	-166.932
2012-11-08 08:29:39	158.07	164.04		10.6684	-161.131	-167.217
2012-11-08 08:39:39	158.34	164.41		10.6753	-161.407	-167.594	2012-11-08 08:39:39
2012-11-08 08:49:39	158.62	164.7		10.6823	-161.692	-167.89
2012-11-08 08:59:39	158.9	165.03		10.6892	-161.978	-168.226
2012-11-08 09:09:39	159.2	165.36		10.6962	-162.283	-168.563
2012-11-08 09:19:39	159.48	165.69		10.7031	-162.569	-168.899
2012-11-08 09:29:39	159.78	166.07		10.71	-162.875	-169.286
2012-11-08 09:39:39	160.06	166.42		10.717	-163.16	-169.643	2012-11-08 09:39:39
2012-11-08 09:49:39	160.33	166.69		10.7239	-163.435	-169.918
2012-11-08 09:59:39	160.58	166.91		10.7309	-163.69	-170.143
2012-11-08 10:09:39	160.77	167.17		10.7378	-163.884	-170.408
2012-11-08 10:19:39	161.07	167.49		10.7448	-164.19	-170.734
2012-11-08 10:29:39	161.3	167.76		10.7517	-164.424	-171.009
2012-11-08 10:39:39	161.56	168.05		10.7587	-164.689	-171.305	2012-11-08 10:39:39
2012-11-08 10:49:39	161.81	168.39		10.7656	-164.944	-171.651
2012-11-08 10:59:39	162.11	168.76		10.7725	-165.25	-172.029
2012-11-08 11:09:39	162.38	169.01		10.7795	-165.525	-172.283
2012-11-08 11:19:39	162.61	169.3		10.7864	-165.759	-172.579
2012-11-08 11:29:39	162.89	169.64		10.7934	-166.045	-172.926
2012-11-08 11:39:39	163.18	169.93		10.8003	-166.34	-173.221	2012-11-08 11:39:39
2012-11-08 11:49:39	163.42	170.27		10.8073	-166.585	-173.568
2012-11-08 11:59:39	163.65	170.6		10.8142	-166.82	-173.904
2012-11-08 12:09:39	163.93	170.86		10.8212	-167.105	-174.169
2012-11-08 12:19:39	164.15	171.18		10.8281	-167.329	-174.495
2012-11-08 12:29:39	164.41	171.46		10.835	-167.594	-174.781
2012-11-08 12:39:39	164.66	171.7		10.842	-167.849	-175.025	2012-11-08 12:39:39
2012-11-08 12:49:39	164.92	172.08		10.8489	-168.114	-175.413
2012-11-08 12:59:39	165.13	172.33		10.8559	-168.328	-175.668
2012-11-08 13:09:39	165.39	172.6		10.8628	-168.593	-175.943
2012-11-08 13:19:39	165.63	172.85		10.8698	-168.838	-176.198
2012-11-08 13:29:39	165.82	173.11		10.8767	-169.032	-176.463
2012-11-08 13:39:39	166.03	173.35		10.8837	-169.246	-176.707	2012-11-08 13:39:39
2012-11-08 13:49:39	166.22	173.6		10.8906	-169.439	-176.962
2012-11-08 13:59:39	166.46	173.87		10.8975	-169.684	-177.238
2012-11-08 14:09:39	166.69	174.09		10.9045	-169.918	-177.462
2012-11-08 14:19:39	166.89	174.32		10.9114	-170.122	-177.696
2012-11-08 14:29:39	166.47	174		10.9184	-169.694	-177.37
2012-11-08 14:39:39	166.92	174.78		10.9253	-170.153	-178.165	2012-11-08 14:39:39
2012-11-08 14:49:39	167.17	175.25		10.9323	-170.408	-178.644
2012-11-08 14:59:39	167.41	175.48		10.9392	-170.652	-178.879
2012-11-08 15:09:39	167.67	175.68		10.9462	-170.917	-179.083
2012-11-08 15:19:39	167.91	175.96		10.9531	-171.162	-179.368
2012-11-08 15:29:39	168.13	176.19		10.96	-171.386	-179.602
2012-11-08 15:39:39	168.36	176.46		10.967	-171.621	-179.878	2012-11-08 15:39:39
2012-11-08 15:49:39	168.58	176.71		10.9739	-171.845	-180.133
2012-11-08 15:59:39	168.8	176.94		10.9809	-172.069	-180.367
2012-11-08 16:09:39	169	177.17		10.9878	-172.273	-180.601
2012-11-08 16:19:39	169.2	177.42		10.9948	-172.477	-180.856
2012-11-08 16:29:39	169.4	177.66		11.0017	-172.681	-181.101
2012-11-08 16:39:39	169.59	177.87		11.0087	-172.875	-181.315	2012-11-08 16:39:39
2012-11-08 16:49:39	169.79	178.15		11.0156	-173.078	-181.6
2012-11-08 16:59:39	169.97	178.37		11.0225	-173.262	-181.825
2012-11-08 17:09:39	170.16	178.61		11.0295	-173.456	-182.069
2012-11-08 17:19:39	170.34	178.88		11.0364	-173.639	-182.345
2012-11-08 17:29:39	170.51	179.13		11.0434	-173.812	-182.599
2012-11-08 17:39:39	170.68	179.35		11.0503	-173.986	-182.824	2012-11-08 17:39:39
2012-11-08 17:49:39	170.88	179.54		11.0573	-174.19	-183.017
2012-11-08 17:59:39	171.03	179.74		11.0642	-174.343	-183.221
2012-11-08 18:09:39	171.21	179.91		11.0712	-174.526	-183.394
2012-11-08 18:19:39	171.37	180.22		11.0781	-174.689	-183.71
2012-11-08 18:29:39	171.52	180.42		11.085	-174.842	-183.914
2012-11-08 18:39:39	171.62	180.59		11.092	-174.944	-184.088	2012-11-08 18:39:39
2012-11-08 18:49:39	171.8	180.87		11.0989	-175.127	-184.373
2012-11-08 18:59:39	171.97	181.19		11.1059	-175.301	-184.699
2012-11-08 19:09:39	172.16	181.41		11.1128	-175.494	-184.924
2012-11-08 19:19:39	172.32	181.7		11.1198	-175.657	-185.219
2012-11-08 19:29:39	172.52	181.91		11.1267	-175.861	-185.433
2012-11-08 19:39:39	172.71	182.23		11.1337	-176.055	-185.759	2012-11-08 19:39:39
2012-11-08 19:49:39	172.88	182.47		11.1406	-176.228	-186.004
2012-11-08 19:59:39	173.08	182.75		11.1475	-176.432	-186.29
2012-11-08 20:09:39	173.25	183.01		11.1545	-176.606	-186.555
2012-11-08 20:19:39	173.45	183.28		11.1614	-176.809	-186.83
2012-11-08 20:29:39	173.61	183.6		11.1684	-176.972	-187.156
2012-11-08 20:39:39	173.8	183.9		11.1753	-177.166	-187.462	2012-11-08 20:39:39
2012-11-08 20:49:39	173.97	184.11		11.1823	-177.339	-187.676
2012-11-08 20:59:39	174.14	184.46		11.1892	-177.513	-188.033
2012-11-08 21:09:39	174.35	184.72		11.1962	-177.727	-188.298
2012-11-08 21:19:39	174.51	184.97		11.2031	-177.89	-188.552
2012-11-08 21:29:39	174.68	185.27		11.21	-178.063	-188.858
2012-11-08 21:39:39	174.86	185.52		11.217	-178.247	-189.113	2012-11-08 21:39:39
2012-11-08 21:49:39	175.03	185.83		11.2239	-178.42	-189.429
2012-11-08 21:59:39	175.19	186.05		11.2309	-178.583	-189.653
2012-11-08 22:09:39	175.37	186.33		11.2378	-178.767	-189.939
2012-11-08 22:19:39	175.52	186.67		11.2448	-178.919	-190.285
2012-11-08 22:29:39	175.72	186.89		11.2517	-179.123	-190.51
2012-11-08 22:39:39	175.85	187.2		11.2587	-179.256	-190.826	2012-11-08 22:39:39
2012-11-08 22:49:39	176.03	187.48		11.2656	-179.439	-191.111
2012-11-08 22:59:39	176.16	187.49		11.2725	-179.572	-191.121
2012-11-08 23:09:39	176.35	187.95		11.2795	-179.766	-191.59
2012-11-08 23:19:39	176.49	188.16		11.2864	-179.908	-191.804
2012-11-08 23:29:39	176.65	188.42		11.2934	-180.071	-192.069
2012-11-08 23:39:39	176.78	188.68		11.3003	-180.204	-192.334	2012-11-08 23:39:39
2012-11-08 23:49:39	176.93	188.95		11.3073	-180.357	-192.61
2012-11-08 23:59:39	177.08	189.18		11.3142	-180.51	-192.844
2012-11-09 00:09:39	177.2	189.44		11.3212	-180.632	-193.109
2012-11-09 00:19:39	177.37	189.73		11.3281	-180.805	-193.405
2012-11-09 00:29:39	177.52	189.91		11.335	-180.958	-193.588
2012-11-09 00:39:39	177.66	190.25		11.342	-181.101	-193.935	2012-11-09 00:39:39
2012-11-09 00:49:39	177.76	190.48		11.3489	-181.203	-194.169
2012-11-09 00:59:39	177.86	190.74		11.3559	-181.305	-194.434
2012-11-09 01:09:39	178.06	191		11.3628	-181.509	-194.699
2012-11-09 01:19:39	178.18	191.28		11.3698	-181.631	-194.985
2012-11-09 01:29:39	178.32	191.54		11.3767	-181.774	-195.25
2012-11-09 01:39:39	178.34	191.76		11.3837	-181.794	-195.474	2012-11-09 01:39:39
2012-11-09 01:49:39	178.6	191.98		11.3906	-182.059	-195.698
2012-11-09 01:59:39	178.72	192.24		11.3975	-182.181	-195.963
2012-11-09 02:09:39	178.87	192.51		11.4045	-182.334	-196.239
2012-11-09 02:19:39	179	192.77		11.4114	-182.467	-196.504
2012-11-09 02:29:39	179.12	192.97		11.4184	-182.589	-196.707
2012-11-09 02:39:39	179.25	193.21		11.4253	-182.722	-196.952	2012-11-09 02:39:39
2012-11-09 02:49:39	179.38	193.4		11.4323	-182.854	-197.146
2012-11-09 02:59:39	179.5	193.63		11.4392	-182.977	-197.38
2012-11-09 03:09:39	179.58	193.89		11.4462	-183.058	-197.645
2012-11-09 03:19:39	179.73	194.1		11.4531	-183.211	-197.859
2012-11-09 03:29:39	179.87	194.39		11.46	-183.354	-198.155
2012-11-09 03:39:39	180	194.52		11.467	-183.486	-198.287	2012-11-09 03:39:39
2012-11-09 03:49:39	180.12	194.87		11.4739	-183.609	-198.644
2012-11-09 03:59:39	180.24	195.07		11.4809	-183.731	-198.848
2012-11-09 04:09:39	180.34	195.32		11.4878	-183.833	-199.103
2012-11-09 04:19:39	180.48	195.56		11.4948	-183.976	-199.348
2012-11-09 04:29:39	180.6	195.76		11.5017	-184.098	-199.551
2012-11-09 04:39:39	180.71	195.98		11.5087	-184.21	-199.776	2012-11-09 04:39:39
2012-11-09 04:49:39	180.81	196.2		11.5156	-184.312	-200
2012-11-09 04:59:39	180.94	196.36		11.5225	-184.444	-200.163
2012-11-09 05:09:39	181.05	196.62		11.5295	-184.557	-200.428
2012-11-09 05:19:39	181.16	196.84		11.5364	-184.669	-200.652
2012-11-09 05:29:39	181.28	197.03		11.5434	-184.791	-200.846
2012-11-09 05:39:39	181.39	197.28		11.5503	-184.903	-201.101	2012-11-09 05:39:39
2012-11-09 05:49:39	181.48	197.54		11.5573	-184.995	-201.366
[truncated: 1,366 more rows]

## Sheet: Tensi
Zeit [d]	MP bot(2) [cm]	MP top(1) [cm]		air entry bot		AE time	AE [cm]	Type	Pos	Weight
0.00865741	-1.22324	-3.69011		NAN	8800	#VALUE!	-8970.44	1	2	1
0.0433796	-1.70234	-4.17941
0.0850463	-2.14067	-4.58716		air entry top
0.126713	-2.47706	-4.91335		Time					Pos	Weight
0.16838	-2.67074	-5.10703		2012-11-14 01:19:39	8800	16.3698	-8970.44	1	1	1
0.210046	-2.96636	-5.39246
0.251713	-3.24159	-5.66769
0.29338	-3.46585	-5.91233
0.335046	-3.70031	-6.14679
0.376713	-3.97554	-6.41182
0.41838	-4.28135	-6.71764
0.460046	-4.04689	-6.48318
0.501713	-4.26096	-6.69725
0.54338	-4.34251	-6.7788
0.585046	-4.49541	-6.92151
0.626713	-4.52599	-6.95209
0.66838	-4.47503	-6.91131
0.710046	-4.65851	-7.0948
0.751713	-4.43425	-6.88073
0.79338	-4.79103	-7.22732
0.835046	-4.9949	-7.421
0.876713	-5.28033	-7.70642
0.91838	-5.46381	-7.88991
0.960046	-5.68807	-8.12436
1.00171	-5.77982	-8.17533
1.04338	-5.89195	-8.30785
1.08505	-5.9633	-8.3894
1.12671	-5.57594	-8.00204
1.16838	-5.41284	-7.81855
1.21005	-5.87156	-8.27727
1.25171	-6.09582	-8.51172
1.29338	-6.27931	-8.68502
1.33505	-6.29969	-8.7054
1.37671	-6.49337	-8.90928
1.41838	-6.6055	-9.0316
1.46005	-6.69725	-9.13354
1.50171	-6.89093	-9.31702
1.54338	-6.99286	-9.42915
1.58505	-7.17635	-9.60245
1.62671	-7.21713	-9.63303
1.66838	-7.35984	-9.78593
1.71005	-7.40061	-9.81651
1.75171	-7.5841	-10
1.79338	-7.77778	-10.2039
1.83505	-7.9001	-10.3058
1.87671	-7.83894	-10.2548
1.91838	-8.04281	-10.4689
1.96005	-8.17533	-10.5708
2.00171	-8.34862	-10.7543
2.04338	-8.5525	-10.948
2.08505	-8.63405	-11.0194
2.12671	-8.81753	-11.1927
2.16838	-8.99083	-11.366
2.21005	-8.88889	-11.2436
2.25171	-9.18451	-11.5291
2.29338	-9.36799	-11.7125
2.33505	-9.57187	-11.9062
2.37671	-9.71458	-12.0591
2.41838	-9.86748	-12.1916
2.46005	-9.98981	-12.3242
2.50171	-10.1529	-12.4873
2.54338	-10.3262	-12.6707
2.58505	-10.5301	-12.8644
2.62671	-10.6626	-12.9969
2.66838	-10.8767	-13.211
2.71005	-10.9582	-13.3028
2.75171	-11.1621	-13.4964
2.79338	-11.3354	-13.6595
2.83505	-8.85831	-11.1621
2.87671	-9.45973	-11.7635
2.91838	-10.0102	-12.3242
2.96005	-10.5607	-12.8542
3.00171	-11.0907	-13.3639
3.04338	-10.8257	-13.1091
3.08505	-11.5494	-13.8124
3.12671	-11.947	-14.21
3.16838	-12.2936	-14.5566
3.21005	-12.6096	-14.8522
3.25171	-12.8746	-15.1376
3.29338	-13.1091	-15.3823
3.33505	-13.3843	-15.6269
3.37671	-13.6595	-15.9123
3.41838	-13.8226	-16.0754
3.46005	-14.0571	-16.3099
3.50171	-14.2813	-16.524
3.54338	-14.577	-16.8094
3.58505	-14.8114	-17.054
3.62671	-15.0357	-17.2681
3.66838	-14.3221	-16.5647
3.71699	-14.4852	-16.7176
3.75866	-15.0765	-17.3191
3.80032	-15.5454	-17.788
3.84199	-15.8716	-18.104
3.88366	-16.1876	-18.3996
3.92532	-16.4934	-18.7054
3.96699	-16.7686	-18.9908
4.00866	-17.0642	-19.2762
4.05032	-16.9623	-19.1947
4.09199	-17.472	-19.6738
4.13366	-17.8287	-20.0204
4.17532	-18.1855	-20.3466
4.21699	-18.5423	-20.6932
4.25866	-18.9195	-21.0499
4.30032	-19.2661	-21.4067
4.34199	-19.6024	-21.7533
4.38366	-19.9286	-22.0795
4.42532	-20.3058	-22.4567
4.46699	-20.5607	-22.7523
4.50866	-20.8257	-23.0071
4.55032	-21.1519	-23.3129
4.59199	-21.5087	-23.6391
4.63366	-21.8043	-23.945
4.67532	-22.0082	-24.1794
4.71699	-22.2732	-24.4241
4.75866	-22.5178	-24.6993
4.80032	-22.7115	-24.893
4.84199	-22.9766	-25.1478
4.88366	-23.2416	-25.3925
4.92532	-23.3537	-25.6677
4.96699	-23.5372	-25.7492
5.00866	-23.9144	-26.0754
5.05032	-24.2202	-26.3914
5.09199	-24.577	-26.7278
5.13366	-24.9134	-27.054
5.17532	-25.2192	-27.3904
5.21699	-25.6065	-27.788
5.25866	-25.9735	-28.1651
5.30032	-26.3303	-28.5117
5.34199	-26.7074	-28.8685
5.38366	-27.1356	-29.2966
5.42532	-27.5229	-29.6942
5.46699	-27.9001	-30.0815
5.50866	-28.2773	-30.4485
5.55032	-28.6035	-30.7747
5.59199	-28.9704	-31.1417
5.63366	-29.3272	-31.4985
5.67532	-29.7248	-31.8858
5.71699	-30.1325	-32.3038
5.75866	-30.4179	-32.5892
5.80032	-30.8665	-33.0377
5.84199	-31.2742	-33.4455
5.88366	-31.6922	-33.8532
5.92532	-32.0999	-34.261
5.96699	-32.0693	-34.2915
6.00866	-32.6606	-34.8522
6.05032	-33.0683	-35.2192
6.09199	-33.3843	-35.5352
6.13366	-33.9144	-36.0652
6.17532	-34.3731	-36.524
6.21699	-34.893	-37.0031
6.25866	-35.3925	-37.5331
6.30032	-35.9633	-38.0938
6.34199	-36.473	-38.6239
6.38366	-37.0133	-39.1437
6.42532	-37.5229	-39.6636
6.46699	-38.053	-40.2039
6.50866	-38.5831	-40.7441
6.55032	-39.1641	-41.2844
6.59199	-39.6738	-41.8247
6.63366	-40.1835	-42.2936
6.67532	-40.632	-42.7625
6.71699	-41.0907	-43.2416
6.75866	-41.5902	-43.7513
6.80032	-42.0591	-44.2508
6.84199	-42.6198	-44.791
6.88366	-43.1397	-45.3211
6.92532	-43.6901	-45.8512
6.96699	-44.1081	-46.3303
7.00866	-44.7706	-46.9929
7.05032	-45.525	-47.6962
7.09199	-46.208	-48.3996
7.13366	-46.8603	-49.0316
7.17532	-47.5637	-49.7452
7.21699	-48.1549	-50.3466
7.25866	-48.7564	-50.948
7.30032	-49.3884	-51.5902
7.34199	-50.051	-52.2528
7.38366	-50.6932	-52.9154
7.42532	-51.4271	-53.629
7.46699	-52.1305	-54.3323
7.50866	-52.8542	-55.0561
7.55032	-53.5576	-55.7696
7.59199	-54.2915	-56.5036
7.63366	-55.0459	-57.2681
7.67532	-55.841	-58.0734
7.71699	-56.5851	-58.8175
7.75866	-57.37	-59.6024
7.80032	-58.1244	-60.367
7.84199	-59.0112	-61.2232
7.88366	-59.9286	-62.1305
7.92532	-60.8665	-63.0887
7.96699	-61.5902	-63.8736
8.00866	-62.7217	-64.9439
8.05032	-63.792	-66.0245
8.09199	-64.893	-67.1254
8.13366	-66.0143	-68.2467
8.17532	-67.0846	-69.3068
8.21699	-68.1244	-70.3466
8.25866	-69.2661	-71.4781
8.30032	-70.367	-72.6096
8.34199	-71.5291	-73.7615
8.38366	-72.7115	-74.9745
8.42532	-73.945	-76.2181
8.46699	-75.1376	-77.4108
8.50866	-76.3609	-78.634
8.55032	-77.5841	-79.8369
8.59199	-78.7971	-81.0805
8.63366	-80.0815	-82.3649
8.67532	-81.3252	-83.629
8.71699	-82.5994	-84.9032
8.75866	-83.8226	-86.1672
8.80032	-84.9235	-87.2987
8.84199	-86.1264	-88.4913
8.88366	-87.2885	-89.684
8.92532	-88.4098	-90.8155
8.96699	-89.6024	-92.0082
9.00866	-90.9378	-93.4047
9.05032	-92.4669	-94.9643
9.09199	-93.9653	-96.4424
9.13366	-95.5352	-97.9817
9.17532	-97.1458	-99.6942
9.21699	-98.7564	-101.274
9.25866	-100.245	-102.803
9.30032	-101.896	-104.485
9.34199	-103.435	-106.045
9.38366	-104.883	-107.523
9.42532	-106.391	-109.042
9.46699	-107.961	-110.652
9.50866	-109.501	-112.263
9.55032	-111.091	-113.843
9.59199	-112.671	-115.515
9.63366	-114.2	-117.034
9.67532	-115.545	-118.42
9.71699	-116.84	-119.755
9.75866	-118.236	-121.172
9.80032	-119.562	-122.599
9.84199	-121.06	-124.077
9.88366	-122.732	-125.841
9.92532	-124.424	-127.564
9.96699	-126.218	-129.45
10.0087	-128.002	-131.274
10.0503	-129.694	-133.201
10.092	-131.814	-135.382
10.1337	-133.914	-137.492
10.1753	-135.872	-139.592
10.217	-138.104	-141.927
10.2587	-140.285	-144.241
10.3003	-142.477	-146.697
10.342	-144.638	-149.042
10.3837	-146.809	-151.417
10.4253	-149.052	-153.843
10.467	-151.233	-156.3
10.5087	-153.486	-158.787
10.5503	-155.617	-161.101
10.592	-157.696	-163.507
10.6337	-159.633	-165.607
10.6753	-161.407	-167.594
10.717	-163.16	-169.643
10.7587	-164.689	-171.305
10.8003	-166.34	-173.221
10.842	-167.849	-175.025
10.8837	-169.246	-176.707
10.9253	-170.153	-178.165
10.967	-171.621	-179.878
11.0087	-172.875	-181.315
11.0503	-173.986	-182.824
11.092	-174.944	-184.088
11.1337	-176.055	-185.759
11.1753	-177.166	-187.462
11.217	-178.247	-189.113
11.2587	-179.256	-190.826
11.3003	-180.204	-192.334
11.342	-181.101	-193.935
11.3837	-181.794	-195.474
11.4253	-182.722	-196.952
11.467	-183.486	-198.287
11.5087	-184.21	-199.776
11.5503	-184.903	-201.101
11.592	-185.535	-202.324
11.6337	-186.177	-203.578
11.6753	-186.504	-204.098
11.717	-187.054	-205.515
11.7587	-187.574	-206.565
11.8003	-188.104	-207.625
11.842	-188.644	-208.716
11.8837	-189.174	-209.929
11.9253	-189.429	-210.663
11.967	-190.01	-212.212
12.0087	-190.612	-213.507
12.0503	-191.172	-214.577
12.092	-191.641	-215.892
12.1337	-192.151	-217.248
12.1753	-192.63	-218.41
12.217	-193.099	-219.745
12.2587	-193.598	-221.172
12.3003	-194.098	-222.65
12.342	-194.597	-224.128
12.3837	-195.076	-225.759
12.4253	-195.474	-227.411
12.467	-195.953	-229.134
12.5087	-196.391	-230.917
12.5503	-196.82	-232.864
12.592	-197.299	-234.842
12.6337	-197.706	-236.962
12.6753	-198.145	-239.297
12.717	-198.542	-241.733
12.7587	-198.869	-243.221
12.8003	-199.195	-246.228
12.842	-199.572	-249.358
12.8837	-199.949	-252.334
12.9253	-200.357	-255.168
12.967	-200.377	-257.299
13.0087	-200.907	-262.12
13.0503	-201.458	-266.728
13.092	-201.916	-270.632
13.1337	-202.396	-275.617
13.1753	-202.875	-280.112
13.217	-203.313	-285.637
13.2587	-203.71	-290.652
13.3003	-204.179	-297.044
13.342	-204.557	-302.508
13.3837	-204.964	-309.134
13.4253	-205.382	-315.943
13.467	-205.708	-323.863
13.5087	-206.361	-332.712
13.5503	-206.748	-342.232
13.592	-207.136	-350.815
13.6337	-207.503	-362.345
13.6753	-207.88	-373.231
13.717	-208.206	-386.402
13.7587	-208.552	-401.295
13.8003	-208.94	-412.671
13.842	-209.399	-433.751
13.8837	-209.755	-458.848
13.9253	-209.949	-483.068
13.967	-210.122	-510.051
14.0087	-210.724	-548.267
14.0503	-211.386	-588.848
14.092	-211.448	-635.199
14.1337	-212.467	-706.901
14.1753	-213.038	-774.179
14.217	-213.588	-856.656
14.2587	-214.088	-937.543
14.2795	-214.343	-935.657
14.3003	-214.587
14.342	-215.056
14.3837	-215.647
14.4253	-216.188
14.467	-216.667
14.5087	-217.115
14.5503	-217.543
14.592	-217.992
14.6267	-218.389
14.6753	-218.787
14.717	-219.185
14.7587	-219.694
14.8003	-220.143
14.842	-220.296
14.8837	-221.315
14.9253	-222.039
14.967	-222.64
15.0087	-223.14
15.0503	-223.904
15.092	-224.516
15.1337	-225.26
15.1753	-225.923
15.217	-226.473
15.2587	-227.064
15.3003	-227.747
15.342	-228.42
15.3837	-229.032
15.4253	-229.755
15.467	-230.438
15.5087	-231.111
15.5503	-231.753
15.592	-232.406
15.6337	-233.109
15.6753	-233.507
15.717	-233.833
15.7587	-234.495
15.8003	-235.107
15.842	-235.77
15.8837	-236.422
15.9253	-237.176
15.967	-237.931
16.0087	-238.563
16.0503	-239.46
16.092	-240.285
16.1337	-241.131
16.1753	-242.049
16.217	-242.987
16.2587	-244.006
16.3003	-245.025
16.342	-245.872
16.3837	-246.718
16.4253	-247.594
16.467	-248.573
16.5087	-249.562
16.5503	-250.897
16.592	-251.998
16.6337	-252.915
16.6753	-253.68
16.717	-253.741
16.7587	-254.954
16.8003	-256.269
16.842	-257.462
16.8837	-258.573
16.9253	-259.501
16.967	-260.499
17.0087	-261.702
17.0503	-263.14
17.092	-264.444
17.1337	-266.096
17.1753	-267.319
17.217	-268.899
17.2587	-270.387
17.3003	-271.957
17.342	-273.354
17.3837	-275.056
17.4253	-276.707
17.467	-277.849
17.5087	-279.674
17.5503	-281.662
17.592	-283.568
17.6337	-285.341
17.6753	-286.514
17.717	-287.38
17.7587	-288.705
17.8003	-289.032
17.842	-292.161
17.8837	-294.21
17.9253	-295.097
17.967	-296.952
18.0087	-301.101
18.0503	-304.75
18.092	-307.441
18.1337	-310.591
18.1753	-313.333
18.217	-316.137
18.2587	-318.838
18.3003	-321.733
18.342	-324.495
18.3837	-327.543
18.4253	-330.53
18.467	-333.68
18.5087	-337.299
18.5503	-340.245
18.592	-343.782
18.6337	-346.769
18.6753	-348.716
18.717	-352.803
18.7587	-354.241
18.8003	-358.236
18.842	-364.648
18.8837	-368.879
18.9253	-373.609
18.967	-377.462
19.0087	-383.354
19.0503	-388.919
19.092	-393.792
19.1337	-399.623
19.1753	-404.76
19.217	-410.173
19.2587	-416.667
19.3003	-422.375
19.342	-429.164
19.3837	-435.535
19.4253	-442.457
19.467	-449.776
19.5087	-456.606
19.5503	-463.955
19.592	-471.254
19.6337	-480.53
19.6753	-487.747
19.717	-496.269
19.7587	-501.855
19.8003	-511.203
19.842	-525.27
19.8837	-537.238
19.9253	-548.838
19.967	-562.569
20.0087	-576.157
20.0503	-589.929
20.092	-604.139
20.1337	-620.326
20.1753	-635.8
20.217	-653.354
20.2587	-671.672
20.3003	-689.358
20.342	-706.758
20.3837	-723.547
20.4253	-744.149
20.467	-764.608
20.5087	-786.697
20.5503	-808.471
20.592	-833.598
20.6337	-858.93
20.6753	-885.515
20.717	-910.561
20.7587	-938.756
20.8003	-972.294
20.842	-1009.4
20.8837	-1045.78
20.9253	-1081.16
20.967	-1128.02
21.0087	-1169.24
21.0364	-1201.01

## Sheet: HYDRUS
Data für die Zielfunktion: 2 x Tensionen, 1 x Endwassergehalt						Verdunstungsrate
Time	Obs	Type	Pos	Weight		Zeitintervall		Evarate [cm/d]			Type	1-Tension	2-Wassergehalt
0.00865741	-1.22324	1	2	1		0.638704	0	0.409095			Pos	1-top	2-bot	(von oben nach unten)
0.0433796	-1.70234	1	2	1		1.05774	0	0.389716			30	Time-Variable boundary conditions+
0.0850463	-2.14067	1	2	1		1.64543	0	0.331399			21.044	Final Time	Time Information
0.126713	-2.47706	1	2	1		2.17312	0	0.286164			882	Number of Data Points in Objective Function
0.16838	-2.67074	1	2	1		2.67959	0	0.290595		Interpolated Values	-5.19535	BC-top	[hPa]
0.210046	-2.96636	1	2	1		2.79362	0	0.274056			-3.94535	MP_top_ini	[hPa]	1
0.251713	-3.24159	1	2	1		3.02649	0	0.314276			-0.940528	MP_bot_ini	[hPa]	2
0.29338	-3.46585	1	2	1		3.64895	0	0.323252			0.309472	BC-bot	[hPa]
0.335046	-3.70031	1	2	1		4.02804	0	0.322817
0.376713	-3.97554	1	2	1		4.76897	0	0.330885
0.41838	-4.28135	1	2	1		5.15609	0	0.299984
0.460046	-4.04689	1	2	1		5.74894	0	0.324772		Real Values	-4.88914	BC-top	[cm]
0.501713	-4.26096	1	2	1		6.08403	0	0.30023			-3.63914	MP_top_ini	[cm]
0.54338	-4.34251	1	2	1		6.78729	0	0.290409			-1.14169	MP_bot_ini	[cm]
0.585046	-4.49541	1	2	1		7.12692	0	0.276036			0.108308	BC-bot	[cm]
0.626713	-4.52599	1	2	1		7.77866	0	0.250262
0.66838	-4.47503	1	2	1		8.15291	0	0.27259
0.710046	-4.65851	1	2	1		8.79257	0	0.277363
0.751713	-4.43425	1	2	1		9.18626	0	0.283708
0.79338	-4.79103	1	2	1		9.7328	0	0.268921
0.835046	-4.9949	1	2	1		10.1016	0	0.249824
0.876713	-5.28033	1	2	1		10.7342	0	0.271201
0.91838	-5.46381	1	2	1		11.0875	0	0.261422
0.960046	-5.68807	1	2	1		11.6689	0	0.258681
1.00171	-5.77982	1	2	1		13.2377	0	0.169253
1.04338	-5.89195	1	2	1		13.8884	0	0.108447
1.08505	-5.9633	1	2	1		14.0847	0	0.103736
1.12671	-5.57594	1	2	1		14.7266	0	0.101757
1.16838	-5.41284	1	2	1		17.768	0	0.0860428
1.21005	-5.87156	1	2	1		21.044	0	0.0798873
1.25171	-6.09582	1	2	1
1.29338	-6.27931	1	2	1
1.33505	-6.29969	1	2	1
1.37671	-6.49337	1	2	1
1.41838	-6.6055	1	2	1
1.46005	-6.69725	1	2	1
1.50171	-6.89093	1	2	1
1.54338	-6.99286	1	2	1
1.58505	-7.17635	1	2	1
1.62671	-7.21713	1	2	1
1.66838	-7.35984	1	2	1
1.71005	-7.40061	1	2	1
1.75171	-7.5841	1	2	1
1.79338	-7.77778	1	2	1
1.83505	-7.9001	1	2	1
1.87671	-7.83894	1	2	1
1.91838	-8.04281	1	2	1
1.96005	-8.17533	1	2	1
2.00171	-8.34862	1	2	1
2.04338	-8.5525	1	2	1
2.08505	-8.63405	1	2	1
2.12671	-8.81753	1	2	1
2.16838	-8.99083	1	2	1
2.21005	-8.88889	1	2	1
2.25171	-9.18451	1	2	1
2.29338	-9.36799	1	2	1
2.33505	-9.57187	1	2	1
2.37671	-9.71458	1	2	1
2.41838	-9.86748	1	2	1
2.46005	-9.98981	1	2	1
2.50171	-10.1529	1	2	1
2.54338	-10.3262	1	2	1
2.58505	-10.5301	1	2	1
2.62671	-10.6626	1	2	1
2.66838	-10.8767	1	2	1
2.71005	-10.9582	1	2	1
2.75171	-11.1621	1	2	1
2.79338	-11.3354	1	2	1
2.83505	-8.85831	1	2	1
2.87671	-9.45973	1	2	1
2.91838	-10.0102	1	2	1
2.96005	-10.5607	1	2	1
3.00171	-11.0907	1	2	1
3.04338	-10.8257	1	2	1
3.08505	-11.5494	1	2	1
3.12671	-11.947	1	2	1
3.16838	-12.2936	1	2	1
3.21005	-12.6096	1	2	1
3.25171	-12.8746	1	2	1
3.29338	-13.1091	1	2	1
3.33505	-13.3843	1	2	1
3.37671	-13.6595	1	2	1
3.41838	-13.8226	1	2	1
3.46005	-14.0571	1	2	1
3.50171	-14.2813	1	2	1
3.54338	-14.577	1	2	1
3.58505	-14.8114	1	2	1
3.62671	-15.0357	1	2	1
3.66838	-14.3221	1	2	1
3.71699	-14.4852	1	2	1
3.75866	-15.0765	1	2	1
3.80032	-15.5454	1	2	1
3.84199	-15.8716	1	2	1
3.88366	-16.1876	1	2	1
3.92532	-16.4934	1	2	1
3.96699	-16.7686	1	2	1
4.00866	-17.0642	1	2	1
4.05032	-16.9623	1	2	1
4.09199	-17.472	1	2	1
4.13366	-17.8287	1	2	1
4.17532	-18.1855	1	2	1
4.21699	-18.5423	1	2	1
4.25866	-18.9195	1	2	1
4.30032	-19.2661	1	2	1
4.34199	-19.6024	1	2	1
4.38366	-19.9286	1	2	1
4.42532	-20.3058	1	2	1
4.46699	-20.5607	1	2	1
4.50866	-20.8257	1	2	1
4.55032	-21.1519	1	2	1
4.59199	-21.5087	1	2	1
4.63366	-21.8043	1	2	1
4.67532	-22.0082	1	2	1
4.71699	-22.2732	1	2	1
4.75866	-22.5178	1	2	1
4.80032	-22.7115	1	2	1
4.84199	-22.9766	1	2	1
4.88366	-23.2416	1	2	1
4.92532	-23.3537	1	2	1
4.96699	-23.5372	1	2	1
5.00866	-23.9144	1	2	1
5.05032	-24.2202	1	2	1
5.09199	-24.577	1	2	1
5.13366	-24.9134	1	2	1
5.17532	-25.2192	1	2	1
5.21699	-25.6065	1	2	1
5.25866	-25.9735	1	2	1
5.30032	-26.3303	1	2	1
5.34199	-26.7074	1	2	1
5.38366	-27.1356	1	2	1
5.42532	-27.5229	1	2	1
5.46699	-27.9001	1	2	1
5.50866	-28.2773	1	2	1
5.55032	-28.6035	1	2	1
5.59199	-28.9704	1	2	1
5.63366	-29.3272	1	2	1
5.67532	-29.7248	1	2	1
5.71699	-30.1325	1	2	1
5.75866	-30.4179	1	2	1
5.80032	-30.8665	1	2	1
5.84199	-31.2742	1	2	1
5.88366	-31.6922	1	2	1
5.92532	-32.0999	1	2	1
5.96699	-32.0693	1	2	1
6.00866	-32.6606	1	2	1
6.05032	-33.0683	1	2	1
6.09199	-33.3843	1	2	1
6.13366	-33.9144	1	2	1
6.17532	-34.3731	1	2	1
6.21699	-34.893	1	2	1
6.25866	-35.3925	1	2	1
6.30032	-35.9633	1	2	1
6.34199	-36.473	1	2	1
6.38366	-37.0133	1	2	1
6.42532	-37.5229	1	2	1
6.46699	-38.053	1	2	1
6.50866	-38.5831	1	2	1
6.55032	-39.1641	1	2	1
6.59199	-39.6738	1	2	1
6.63366	-40.1835	1	2	1
6.67532	-40.632	1	2	1
6.71699	-41.0907	1	2	1
6.75866	-41.5902	1	2	1
6.80032	-42.0591	1	2	1
6.84199	-42.6198	1	2	1
6.88366	-43.1397	1	2	1
6.92532	-43.6901	1	2	1
6.96699	-44.1081	1	2	1
7.00866	-44.7706	1	2	1
7.05032	-45.525	1	2	1
7.09199	-46.208	1	2	1
7.13366	-46.8603	1	2	1
7.17532	-47.5637	1	2	1
7.21699	-48.1549	1	2	1
7.25866	-48.7564	1	2	1
7.30032	-49.3884	1	2	1
7.34199	-50.051	1	2	1
7.38366	-50.6932	1	2	1
7.42532	-51.4271	1	2	1
7.46699	-52.1305	1	2	1
7.50866	-52.8542	1	2	1
7.55032	-53.5576	1	2	1
7.59199	-54.2915	1	2	1
7.63366	-55.0459	1	2	1
7.67532	-55.841	1	2	1
7.71699	-56.5851	1	2	1
7.75866	-57.37	1	2	1
7.80032	-58.1244	1	2	1
7.84199	-59.0112	1	2	1
7.88366	-59.9286	1	2	1
7.92532	-60.8665	1	2	1
7.96699	-61.5902	1	2	1
8.00866	-62.7217	1	2	1
8.05032	-63.792	1	2	1
8.09199	-64.893	1	2	1
8.13366	-66.0143	1	2	1
8.17532	-67.0846	1	2	1
8.21699	-68.1244	1	2	1
8.25866	-69.2661	1	2	1
8.30032	-70.367	1	2	1
8.34199	-71.5291	1	2	1
8.38366	-72.7115	1	2	1
8.42532	-73.945	1	2	1
8.46699	-75.1376	1	2	1
8.50866	-76.3609	1	2	1
8.55032	-77.5841	1	2	1
8.59199	-78.7971	1	2	1
8.63366	-80.0815	1	2	1
8.67532	-81.3252	1	2	1
8.71699	-82.5994	1	2	1
8.75866	-83.8226	1	2	1
8.80032	-84.9235	1	2	1
8.84199	-86.1264	1	2	1
8.88366	-87.2885	1	2	1
8.92532	-88.4098	1	2	1
8.96699	-89.6024	1	2	1
9.00866	-90.9378	1	2	1
9.05032	-92.4669	1	2	1
9.09199	-93.9653	1	2	1
9.13366	-95.5352	1	2	1
9.17532	-97.1458	1	2	1
9.21699	-98.7564	1	2	1
9.25866	-100.245	1	2	1
9.30032	-101.896	1	2	1
9.34199	-103.435	1	2	1
9.38366	-104.883	1	2	1
9.42532	-106.391	1	2	1
9.46699	-107.961	1	2	1
9.50866	-109.501	1	2	1
9.55032	-111.091	1	2	1
9.59199	-112.671	1	2	1
9.63366	-114.2	1	2	1
9.67532	-115.545	1	2	1
9.71699	-116.84	1	2	1
9.75866	-118.236	1	2	1
9.80032	-119.562	1	2	1
9.84199	-121.06	1	2	1
9.88366	-122.732	1	2	1
9.92532	-124.424	1	2	1
9.96699	-126.218	1	2	1
10.0087	-128.002	1	2	1
10.0503	-129.694	1	2	1
10.092	-131.814	1	2	1
10.1337	-133.914	1	2	1
10.1753	-135.872	1	2	1
10.217	-138.104	1	2	1
10.2587	-140.285	1	2	1
10.3003	-142.477	1	2	1
10.342	-144.638	1	2	1
10.3837	-146.809	1	2	1
10.4253	-149.052	1	2	1
10.467	-151.233	1	2	1
10.5087	-153.486	1	2	1
10.5503	-155.617	1	2	1
10.592	-157.696	1	2	1
10.6337	-159.633	1	2	1
10.6753	-161.407	1	2	1
10.717	-163.16	1	2	1
10.7587	-164.689	1	2	1
10.8003	-166.34	1	2	1
10.842	-167.849	1	2	1
10.8837	-169.246	1	2	1
10.9253	-170.153	1	2	1
10.967	-171.621	1	2	1
11.0087	-172.875	1	2	1
11.0503	-173.986	1	2	1
11.092	-174.944	1	2	1
11.1337	-176.055	1	2	1
11.1753	-177.166	1	2	1
11.217	-178.247	1	2	1
11.2587	-179.256	1	2	1
11.3003	-180.204	1	2	1
11.342	-181.101	1	2	1
11.3837	-181.794	1	2	1
11.4253	-182.722	1	2	1
11.467	-183.486	1	2	1
11.5087	-184.21	1	2	1
11.5503	-184.903	1	2	1
11.592	-185.535	1	2	1
11.6337	-186.177	1	2	1
11.6753	-186.504	1	2	1
11.717	-187.054	1	2	1
11.7587	-187.574	1	2	1
11.8003	-188.104	1	2	1
11.842	-188.644	1	2	1
11.8837	-189.174	1	2	1
11.9253	-189.429	1	2	1
11.967	-190.01	1	2	1
12.0087	-190.612	1	2	1
12.0503	-191.172	1	2	1
12.092	-191.641	1	2	1
12.1337	-192.151	1	2	1
12.1753	-192.63	1	2	1
12.217	-193.099	1	2	1
12.2587	-193.598	1	2	1
12.3003	-194.098	1	2	1
12.342	-194.597	1	2	1
12.3837	-195.076	1	2	1
12.4253	-195.474	1	2	1
12.467	-195.953	1	2	1
12.5087	-196.391	1	2	1
12.5503	-196.82	1	2	1
12.592	-197.299	1	2	1
12.6337	-197.706	1	2	1
12.6753	-198.145	1	2	1
12.717	-198.542	1	2	1
12.7587	-198.869	1	2	1
12.8003	-199.195	1	2	1
12.842	-199.572	1	2	1
12.8837	-199.949	1	2	1
12.9253	-200.357	1	2	1
12.967	-200.377	1	2	1
13.0087	-200.907	1	2	1
13.0503	-201.458	1	2	1
13.092	-201.916	1	2	1
13.1337	-202.396	1	2	1
13.1753	-202.875	1	2	1
13.217	-203.313	1	2	1
13.2587	-203.71	1	2	1
13.3003	-204.179	1	2	1
13.342	-204.557	1	2	1
13.3837	-204.964	1	2	1
13.4253	-205.382	1	2	1
13.467	-205.708	1	2	1
13.5087	-206.361	1	2	1
13.5503	-206.748	1	2	1
13.592	-207.136	1	2	1
13.6337	-207.503	1	2	1
13.6753	-207.88	1	2	1
13.717	-208.206	1	2	1
13.7587	-208.552	1	2	1
13.8003	-208.94	1	2	1
13.842	-209.399	1	2	1
13.8837	-209.755	1	2	1
13.9253	-209.949	1	2	1
13.967	-210.122	1	2	1
14.0087	-210.724	1	2	1
14.0503	-211.386	1	2	1
14.092	-211.448	1	2	1
14.1337	-212.467	1	2	1
14.1753	-213.038	1	2	1
14.217	-213.588	1	2	1
14.2587	-214.088	1	2	1
14.2795	-214.343	1	2	1
14.3003	-214.587	1	2	1
14.342	-215.056	1	2	1
14.3837	-215.647	1	2	1
14.4253	-216.188	1	2	1
14.467	-216.667	1	2	1
14.5087	-217.115	1	2	1
14.5503	-217.543	1	2	1
14.592	-217.992	1	2	1
14.6267	-218.389	1	2	1
14.6753	-218.787	1	2	1
14.717	-219.185	1	2	1
14.7587	-219.694	1	2	1
14.8003	-220.143	1	2	1
14.842	-220.296	1	2	1
14.8837	-221.315	1	2	1
14.9253	-222.039	1	2	1
14.967	-222.64	1	2	1
15.0087	-223.14	1	2	1
15.0503	-223.904	1	2	1
15.092	-224.516	1	2	1
15.1337	-225.26	1	2	1
15.1753	-225.923	1	2	1
15.217	-226.473	1	2	1
15.2587	-227.064	1	2	1
15.3003	-227.747	1	2	1
15.342	-228.42	1	2	1
15.3837	-229.032	1	2	1
15.4253	-229.755	1	2	1
15.467	-230.438	1	2	1
15.5087	-231.111	1	2	1
15.5503	-231.753	1	2	1
15.592	-232.406	1	2	1
15.6337	-233.109	1	2	1
15.6753	-233.507	1	2	1
15.717	-233.833	1	2	1
15.7587	-234.495	1	2	1
15.8003	-235.107	1	2	1
15.842	-235.77	1	2	1
15.8837	-236.422	1	2	1
15.9253	-237.176	1	2	1
15.967	-237.931	1	2	1
16.0087	-238.563	1	2	1
16.0503	-239.46	1	2	1
16.092	-240.285	1	2	1
16.1337	-241.131	1	2	1
16.1753	-242.049	1	2	1
16.217	-242.987	1	2	1
16.2587	-244.006	1	2	1
16.3003	-245.025	1	2	1
16.342	-245.872	1	2	1
16.3837	-246.718	1	2	1
16.4253	-247.594	1	2	1
16.467	-248.573	1	2	1
16.5087	-249.562	1	2	1
16.5503	-250.897	1	2	1
16.592	-251.998	1	2	1
16.6337	-252.915	1	2	1
16.6753	-253.68	1	2	1
16.717	-253.741	1	2	1
16.7587	-254.954	1	2	1
16.8003	-256.269	1	2	1
16.842	-257.462	1	2	1
16.8837	-258.573	1	2	1
16.9253	-259.501	1	2	1
16.967	-260.499	1	2	1
17.0087	-261.702	1	2	1
17.0503	-263.14	1	2	1
17.092	-264.444	1	2	1
17.1337	-266.096	1	2	1
17.1753	-267.319	1	2	1
17.217	-268.899	1	2	1
17.2587	-270.387	1	2	1
17.3003	-271.957	1	2	1
17.342	-273.354	1	2	1
17.3837	-275.056	1	2	1
17.4253	-276.707	1	2	1
17.467	-277.849	1	2	1
17.5087	-279.674	1	2	1
17.5503	-281.662	1	2	1
17.592	-283.568	1	2	1
17.6337	-285.341	1	2	1
17.6753	-286.514	1	2	1
17.717	-287.38	1	2	1
17.7587	-288.705	1	2	1
17.8003	-289.032	1	2	1
17.842	-292.161	1	2	1
17.8837	-294.21	1	2	1
17.9253	-295.097	1	2	1
17.967	-296.952	1	2	1
18.0087	-301.101	1	2	1
18.0503	-304.75	1	2	1
18.092	-307.441	1	2	1
18.1337	-310.591	1	2	1
18.1753	-313.333	1	2	1
18.217	-316.137	1	2	1
18.2587	-318.838	1	2	1
18.3003	-321.733	1	2	1
18.342	-324.495	1	2	1
18.3837	-327.543	1	2	1
18.4253	-330.53	1	2	1
18.467	-333.68	1	2	1
18.5087	-337.299	1	2	1
18.5503	-340.245	1	2	1
18.592	-343.782	1	2	1
18.6337	-346.769	1	2	1
18.6753	-348.716	1	2	1
18.717	-352.803	1	2	1
18.7587	-354.241	1	2	1
18.8003	-358.236	1	2	1
18.842	-364.648	1	2	1
18.8837	-368.879	1	2	1
18.9253	-373.609	1	2	1
18.967	-377.462	1	2	1
19.0087	-383.354	1	2	1
19.0503	-388.919	1	2	1
19.092	-393.792	1	2	1
19.1337	-399.623	1	2	1
19.1753	-404.76	1	2	1
19.217	-410.173	1	2	1
19.2587	-416.667	1	2	1
19.3003	-422.375	1	2	1
19.342	-429.164	1	2	1
19.3837	-435.535	1	2	1
19.4253	-442.457	1	2	1
19.467	-449.776	1	2	1
19.5087	-456.606	1	2	1
19.5503	-463.955	1	2	1
19.592	-471.254	1	2	1
19.6337	-480.53	1	2	1
19.6753	-487.747	1	2	1
19.717	-496.269	1	2	1
19.7587	-501.855	1	2	1
19.8003	-511.203	1	2	1
19.842	-525.27	1	2	1
19.8837	-537.238	1	2	1
19.9253	-548.838	1	2	1
19.967	-562.569	1	2	1
20.0087	-576.157	1	2	1
20.0503	-589.929	1	2	1
20.092	-604.139	1	2	1
20.1337	-620.326	1	2	1
20.1753	-635.8	1	2	1
20.217	-653.354	1	2	1
20.2587	-671.672	1	2	1
20.3003	-689.358	1	2	1
20.342	-706.758	1	2	1
20.3837	-723.547	1	2	1
20.4253	-744.149	1	2	1
20.467	-764.608	1	2	1
20.5087	-786.697	1	2	1
20.5503	-808.471	1	2	1
20.592	-833.598	1	2	1
20.6337	-858.93	1	2	1
20.6753	-885.515	1	2	1
20.717	-910.561	1	2	1
20.7587	-938.756	1	2	1
20.8003	-972.294	1	2	1
20.842	-1009.4	1	2	1
20.8837	-1045.78	1	2	1
20.9253	-1081.16	1	2	1
20.967	-1128.02	1	2	1
21.0087	-1169.24	1	2	1
21.0364	-1201.01	1	2	1
0.00865741	-3.69011	1	1	1
0.0433796	-4.17941	1	1	1
0.0850463	-4.58716	1	1	1
0.126713	-4.91335	1	1	1
0.16838	-5.10703	1	1	1
0.210046	-5.39246	1	1	1
0.251713	-5.66769	1	1	1
0.29338	-5.91233	1	1	1
0.335046	-6.14679	1	1	1
0.376713	-6.41182	1	1	1
0.41838	-6.71764	1	1	1
0.460046	-6.48318	1	1	1
0.501713	-6.69725	1	1	1
0.54338	-6.7788	1	1	1
0.585046	-6.92151	1	1	1
0.626713	-6.95209	1	1	1
0.66838	-6.91131	1	1	1
0.710046	-7.0948	1	1	1
0.751713	-6.88073	1	1	1
0.79338	-7.22732	1	1	1
0.835046	-7.421	1	1	1
0.876713	-7.70642	1	1	1
0.91838	-7.88991	1	1	1
0.960046	-8.12436	1	1	1
1.00171	-8.17533	1	1	1
1.04338	-8.30785	1	1	1
1.08505	-8.3894	1	1	1
1.12671	-8.00204	1	1	1
1.16838	-7.81855	1	1	1
1.21005	-8.27727	1	1	1
1.25171	-8.51172	1	1	1
1.29338	-8.68502	1	1	1
1.33505	-8.7054	1	1	1
1.37671	-8.90928	1	1	1
1.41838	-9.0316	1	1	1
1.46005	-9.13354	1	1	1
1.50171	-9.31702	1	1	1
1.54338	-9.42915	1	1	1
1.58505	-9.60245	1	1	1
1.62671	-9.63303	1	1	1
1.66838	-9.78593	1	1	1
1.71005	-9.81651	1	1	1
1.75171	-10	1	1	1
1.79338	-10.2039	1	1	1
1.83505	-10.3058	1	1	1
1.87671	-10.2548	1	1	1
1.91838	-10.4689	1	1	1
1.96005	-10.5708	1	1	1
2.00171	-10.7543	1	1	1
2.04338	-10.948	1	1	1
2.08505	-11.0194	1	1	1
2.12671	-11.1927	1	1	1
2.16838	-11.366	1	1	1
2.21005	-11.2436	1	1	1
2.25171	-11.5291	1	1	1
2.29338	-11.7125	1	1	1
2.33505	-11.9062	1	1	1
2.37671	-12.0591	1	1	1
2.41838	-12.1916	1	1	1
2.46005	-12.3242	1	1	1
2.50171	-12.4873	1	1	1
2.54338	-12.6707	1	1	1
2.58505	-12.8644	1	1	1
2.62671	-12.9969	1	1	1
2.66838	-13.211	1	1	1
2.71005	-13.3028	1	1	1
2.75171	-13.4964	1	1	1
2.79338	-13.6595	1	1	1
2.83505	-11.1621	1	1	1
2.87671	-11.7635	1	1	1
2.91838	-12.3242	1	1	1
2.96005	-12.8542	1	1	1
3.00171	-13.3639	1	1	1
3.04338	-13.1091	1	1	1
3.08505	-13.8124	1	1	1
3.12671	-14.21	1	1	1
3.16838	-14.5566	1	1	1
3.21005	-14.8522	1	1	1
3.25171	-15.1376	1	1	1
3.29338	-15.3823	1	1	1
3.33505	-15.6269	1	1	1
3.37671	-15.9123	1	1	1
3.41838	-16.0754	1	1	1
3.46005	-16.3099	1	1	1
3.50171	-16.524	1	1	1
3.54338	-16.8094	1	1	1
3.58505	-17.054	1	1	1
3.62671	-17.2681	1	1	1
3.66838	-16.5647	1	1	1
3.71699	-16.7176	1	1	1
3.75866	-17.3191	1	1	1
3.80032	-17.788	1	1	1
3.84199	-18.104	1	1	1
3.88366	-18.3996	1	1	1
3.92532	-18.7054	1	1	1
3.96699	-18.9908	1	1	1
4.00866	-19.2762	1	1	1
4.05032	-19.1947	1	1	1
4.09199	-19.6738	1	1	1
4.13366	-20.0204	1	1	1
4.17532	-20.3466	1	1	1
4.21699	-20.6932	1	1	1
4.25866	-21.0499	1	1	1
4.30032	-21.4067	1	1	1
4.34199	-21.7533	1	1	1
4.38366	-22.0795	1	1	1
4.42532	-22.4567	1	1	1
4.46699	-22.7523	1	1	1
4.50866	-23.0071	1	1	1
4.55032	-23.3129	1	1	1
4.59199	-23.6391	1	1	1
4.63366	-23.945	1	1	1
4.67532	-24.1794	1	1	1
4.71699	-24.4241	1	1	1
4.75866	-24.6993	1	1	1
4.80032	-24.893	1	1	1
4.84199	-25.1478	1	1	1
4.88366	-25.3925	1	1	1
4.92532	-25.6677	1	1	1
4.96699	-25.7492	1	1	1
5.00866	-26.0754	1	1	1
5.05032	-26.3914	1	1	1
5.09199	-26.7278	1	1	1
5.13366	-27.054	1	1	1
5.17532	-27.3904	1	1	1
5.21699	-27.788	1	1	1
5.25866	-28.1651	1	1	1
5.30032	-28.5117	1	1	1
5.34199	-28.8685	1	1	1
5.38366	-29.2966	1	1	1
5.42532	-29.6942	1	1	1
5.46699	-30.0815	1	1	1
5.50866	-30.4485	1	1	1
5.55032	-30.7747	1	1	1
5.59199	-31.1417	1	1	1
5.63366	-31.4985	1	1	1
5.67532	-31.8858	1	1	1
5.71699	-32.3038	1	1	1
5.75866	-32.5892	1	1	1
5.80032	-33.0377	1	1	1
5.84199	-33.4455	1	1	1
5.88366	-33.8532	1	1	1
5.92532	-34.261	1	1	1
5.96699	-34.2915	1	1	1
6.00866	-34.8522	1	1	1
6.05032	-35.2192	1	1	1
6.09199	-35.5352	1	1	1
6.13366	-36.0652	1	1	1
6.17532	-36.524	1	1	1
6.21699	-37.0031	1	1	1
6.25866	-37.5331	1	1	1
6.30032	-38.0938	1	1	1
6.34199	-38.6239	1	1	1
6.38366	-39.1437	1	1	1
6.42532	-39.6636	1	1	1
6.46699	-40.2039	1	1	1
6.50866	-40.7441	1	1	1
6.55032	-41.2844	1	1	1
6.59199	-41.8247	1	1	1
6.63366	-42.2936	1	1	1
6.67532	-42.7625	1	1	1
6.71699	-43.2416	1	1	1
6.75866	-43.7513	1	1	1
6.80032	-44.2508	1	1	1
6.84199	-44.791	1	1	1
6.88366	-45.3211	1	1	1
6.92532	-45.8512	1	1	1
6.96699	-46.3303	1	1	1
7.00866	-46.9929	1	1	1
7.05032	-47.6962	1	1	1
7.09199	-48.3996	1	1	1
7.13366	-49.0316	1	1	1
7.17532	-49.7452	1	1	1
7.21699	-50.3466	1	1	1
7.25866	-50.948	1	1	1
7.30032	-51.5902	1	1	1
7.34199	-52.2528	1	1	1
7.38366	-52.9154	1	1	1
7.42532	-53.629	1	1	1
7.46699	-54.3323	1	1	1
7.50866	-55.0561	1	1	1
7.55032	-55.7696	1	1	1
7.59199	-56.5036	1	1	1
7.63366	-57.2681	1	1	1
7.67532	-58.0734	1	1	1
7.71699	-58.8175	1	1	1
7.75866	-59.6024	1	1	1
7.80032	-60.367	1	1	1
7.84199	-61.2232	1	1	1
7.88366	-62.1305	1	1	1
7.92532	-63.0887	1	1	1
7.96699	-63.8736	1	1	1
8.00866	-64.9439	1	1	1
8.05032	-66.0245	1	1	1
8.09199	-67.1254	1	1	1
8.13366	-68.2467	1	1	1
8.17532	-69.3068	1	1	1
8.21699	-70.3466	1	1	1
8.25866	-71.4781	1	1	1
8.30032	-72.6096	1	1	1
8.34199	-73.7615	1	1	1
8.38366	-74.9745	1	1	1
8.42532	-76.2181	1	1	1
8.46699	-77.4108	1	1	1
8.50866	-78.634	1	1	1
8.55032	-79.8369	1	1	1
8.59199	-81.0805	1	1	1
8.63366	-82.3649	1	1	1
8.67532	-83.629	1	1	1
8.71699	-84.9032	1	1	1
8.75866	-86.1672	1	1	1
8.80032	-87.2987	1	1	1
8.84199	-88.4913	1	1	1
8.88366	-89.684	1	1	1
8.92532	-90.8155	1	1	1
8.96699	-92.0082	1	1	1
9.00866	-93.4047	1	1	1
9.05032	-94.9643	1	1	1
9.09199	-96.4424	1	1	1
9.13366	-97.9817	1	1	1
9.17532	-99.6942	1	1	1
9.21699	-101.274	1	1	1
9.25866	-102.803	1	1	1
9.30032	-104.485	1	1	1
9.34199	-106.045	1	1	1
9.38366	-107.523	1	1	1
9.42532	-109.042	1	1	1
9.46699	-110.652	1	1	1
9.50866	-112.263	1	1	1
9.55032	-113.843	1	1	1
9.59199	-115.515	1	1	1
9.63366	-117.034	1	1	1
9.67532	-118.42	1	1	1
9.71699	-119.755	1	1	1
9.75866	-121.172	1	1	1
9.80032	-122.599	1	1	1
9.84199	-124.077	1	1	1
9.88366	-125.841	1	1	1
9.92532	-127.564	1	1	1
9.96699	-129.45	1	1	1
10.0087	-131.274	1	1	1
10.0503	-133.201	1	1	1
10.092	-135.382	1	1	1
10.1337	-137.492	1	1	1
10.1753	-139.592	1	1	1
10.217	-141.927	1	1	1
10.2587	-144.241	1	1	1
10.3003	-146.697	1	1	1
10.342	-149.042	1	1	1
10.3837	-151.417	1	1	1
10.4253	-153.843	1	1	1
10.467	-156.3	1	1	1
10.5087	-158.787	1	1	1
10.5503	-161.101	1	1	1
10.592	-163.507	1	1	1
10.6337	-165.607	1	1	1
10.6753	-167.594	1	1	1
10.717	-169.643	1	1	1
10.7587	-171.305	1	1	1
10.8003	-173.221	1	1	1
10.842	-175.025	1	1	1
10.8837	-176.707	1	1	1
10.9253	-178.165	1	1	1
10.967	-179.878	1	1	1
11.0087	-181.315	1	1	1
11.0503	-182.824	1	1	1
11.092	-184.088	1	1	1
11.1337	-185.759	1	1	1
11.1753	-187.462	1	1	1
11.217	-189.113	1	1	1
11.2587	-190.826	1	1	1
11.3003	-192.334	1	1	1
11.342	-193.935	1	1	1
11.3837	-195.474	1	1	1
11.4253	-196.952	1	1	1
11.467	-198.287	1	1	1
11.5087	-199.776	1	1	1
11.5503	-201.101	1	1	1
11.592	-202.324	1	1	1
11.6337	-203.578	1	1	1
11.6753	-204.098	1	1	1
11.717	-205.515	1	1	1
11.7587	-206.565	1	1	1
11.8003	-207.625	1	1	1
11.842	-208.716	1	1	1
11.8837	-209.929	1	1	1
11.9253	-210.663	1	1	1
11.967	-212.212	1	1	1
12.0087	-213.507	1	1	1
12.0503	-214.577	1	1	1
12.092	-215.892	1	1	1
12.1337	-217.248	1	1	1
12.1753	-218.41	1	1	1
12.217	-219.745	1	1	1
12.2587	-221.172	1	1	1
12.3003	-222.65	1	1	1
12.342	-224.128	1	1	1
12.3837	-225.759	1	1	1
12.4253	-227.411	1	1	1
12.467	-229.134	1	1	1
12.5087	-230.917	1	1	1
12.5503	-232.864	1	1	1
12.592	-234.842	1	1	1
12.6337	-236.962	1	1	1
12.6753	-239.297	1	1	1
12.717	-241.733	1	1	1
12.7587	-243.221	1	1	1
12.8003	-246.228	1	1	1
12.842	-249.358	1	1	1
12.8837	-252.334	1	1	1
12.9253	-255.168	1	1	1
12.967	-257.299	1	1	1
13.0087	-262.12	1	1	1
13.0503	-266.728	1	1	1
13.092	-270.632	1	1	1
13.1337	-275.617	1	1	1
13.1753	-280.112	1	1	1
13.217	-285.637	1	1	1
13.2587	-290.652	1	1	1
13.3003	-297.044	1	1	1
13.342	-302.508	1	1	1
13.3837	-309.134	1	1	1
13.4253	-315.943	1	1	1
13.467	-323.863	1	1	1
13.5087	-332.712	1	1	1
13.5503	-342.232	1	1	1
13.592	-350.815	1	1	1
13.6337	-362.345	1	1	1
13.6753	-373.231	1	1	1
13.717	-386.402	1	1	1
13.7587	-401.295	1	1	1
13.8003	-412.671	1	1	1
13.842	-433.751	1	1	1
13.8837	-458.848	1	1	1
13.9253	-483.068	1	1	1
13.967	-510.051	1	1	1
14.0087	-548.267	1	1	1
14.0503	-588.848	1	1	1
14.092	-635.199	1	1	1
14.1337	-706.901	1	1	1
14.1753	-774.179	1	1	1
14.217	-856.656	1	1	1
14.2587	-937.543	1	1	1
14.2795	-935.657	1	1	1
16.3698	-8970.44	1	1	1
0.638704	0.887581	2	0	100000
1.05774	0.854919	2	0	100000
1.64543	0.815968	2	0	100000
2.17312	0.785766	2	0	100000
2.67959	0.756331	2	0	100000
2.79362	0.750081	2	0	100000
3.02649	0.735444	2	0	100000
3.64895	0.695202	2	0	100000
4.02804	0.670726	2	0	100000
4.76897	0.621694	2	0	100000
5.15609	0.598468	2	0	100000
5.74894	0.55996	2	0	100000
6.08403	0.539839	2	0	100000
6.78729	0.498992	2	0	100000
7.12692	0.480242	2	0	100000
7.77866	0.447621	2	0	100000
8.15291	0.427218	2	0	100000
8.79257	0.391734	2	0	100000
9.18626	0.369395	2	0	100000
9.7328	0.34	2	0	100000
10.1016	0.321573	2	0	100000
10.7342	0.287258	2	0	100000
11.0875	0.26879	2	0	100000
11.6689	0.23871	2	0	100000
13.2377	0.185605	2	0	100000
13.8884	0.171492	2	0	100000
14.0847	0.167419	2	0	100000
14.7266	0.154355	2	0	100000
17.768	0.102016	2	0	100000
21.0434	0.0496846	2	0	100000

## Sheet: tens_interpolation
		Datum / Zeit	Tension unten [hPa]	Tension oben [hPa]
m_bot	b_bot	2013-07-31 15:49:15	0.65	3.59
82.8	-3.43509e+06	2013-07-31 16:09:15	1.8	4.76
m_top	b_top	2013-07-31 15:53:59	0.921717	3.86644
84.24	-3.49483e+06	y = m*x+b
		AE unten [t]	AE oben [t]
		41227.2
			Brutto-Gewicht [g]	Netto-Gewicht [g]
-1.40314	58626.9	2013-08-23 17:58:52	382.99	12.72
		2013-08-24 10:54:53	382	11.73
-1.40314	58256.7	2013-08-24 06:49:00	382.24	11.9696
			AE unten
m_bot	b_bot	2012-11-12 09:53:30	608.62	49.52
-4.26772	176547	2012-11-15 10:53:10	595.64	36.54
m_top	b_top	2012-11-18 17:29:39	581.662	22.5618
-4.26772	175988	y = m*x+b
