# Supplementary material for: A pore-size classification for peat bogs derived from unsaturated hydraulic properties
Source: Copernicus journal article supplement (doi:10.5194/hess-21-6185-2017), 2017-12-07
Supplement: Supplementary file 4 [file E1_HYDRUS.xlsx]

## Sheet: Gewicht
Datum / Zeit	Brutto-Gewicht [g]	Netto-Gewicht [g]	Gewichtsänderung [g]	Zeit [d]	Theta [-]	Verdunstungsrate [cm/d]		Volumen	208
2013-07-31 15:21:25	518.35	140.45	0					Höhe	5
2013-08-01 07:31:39	512.14	134.24	-6.21	0.673772	0.622788	0.221557		A	41.6
2013-08-01 20:13:18	506.65	128.75	-11.7	1.2027	0.596394	0.249506		Theta0	0.652644
2013-08-02 08:33:34	502.21	124.31	-16.14	1.71677	0.575048	0.20762		Trockengewicht	4.7
2013-08-02 12:39:28	500.78	122.88	-17.57	1.88754	0.568173	0.201295		Ks (as in Ksat)
2013-08-02 19:44:20	497.16	119.26	-21.19	2.18258	0.550769	0.294939		delta System [g]	377.9
2013-08-03 07:04:57	492.7	114.8	-25.65	2.65523	0.529327	0.22683
2013-08-03 15:08:53	489.75	111.85	-28.6	2.9913	0.515144	0.211011
2013-08-03 21:01:33	487.54	109.64	-30.81	3.23621	0.504519	0.216917
2013-08-04 10:12:39	483.62	105.72	-34.73	3.78558	0.485673	0.171523
2013-08-04 20:13:26	480.15	102.25	-38.2	4.20279	0.46899	0.199933
2013-08-05 08:39:36	476.14	98.24	-42.21	4.72096	0.449712	0.186029
2013-08-05 13:27:34	474.47	96.57	-43.88	4.92094	0.441683	0.200744
2013-08-05 20:45:09	471.41	93.51	-46.94	5.22481	0.426971	0.242064
2013-08-06 07:16:27	468.07	90.17	-50.28	5.66322	0.410913	0.183138
2013-08-06 12:49:04	466.44	88.54	-51.91	5.8942	0.403077	0.169635
2013-08-06 18:17:29	464.18	86.28	-54.17	6.12227	0.392212	0.238203
2013-08-07 08:10:55	459.82	81.92	-58.53	6.70104	0.37125	0.181086
2013-08-07 13:11:15	458.36	80.46	-59.99	6.90961	0.364231	0.168273
2013-08-07 19:23:45	456.59	78.69	-61.76	7.16829	0.355721	0.164483
2013-08-08 08:26:33	453.29	75.39	-65.06	7.7119	0.339856	0.145926
2013-08-08 19:50:46	450.15	72.25	-68.2	8.18705	0.32476	0.158855
2013-08-09 09:24:31	445.72	67.82	-72.63	8.75216	0.303462	0.188444
2013-08-09 13:17:52	444.37	66.47	-73.98	8.9142	0.296971	0.200272
2013-08-09 18:31:03	442.23	64.33	-76.12	9.13169	0.286683	0.236527
2013-08-10 09:23:09	436.44	58.54	-81.91	9.7512	0.258846	0.224664
2013-08-10 17:38:28	433.37	55.47	-84.98	10.0952	0.244087	0.21455
2013-08-11 05:21:42	428.87	50.97	-89.48	10.5835	0.222452	0.221504
2013-08-11 20:24:07	422.97	45.07	-95.38	11.2102	0.194087	0.226314
2013-08-12 08:32:34	418.64	40.74	-99.71	11.7161	0.173269	0.20576
2013-08-12 12:47:30	417.33	39.43	-101.02	11.8931	0.166971	0.177875
2013-08-12 17:58:13	415.83	37.93	-102.52	12.1089	0.15976	0.16711
2013-08-13 08:06:36	411.84	33.94	-106.51	12.698	0.140577	0.162798
2013-08-13 12:54:44	410.59	32.69	-107.76	12.8981	0.134567	0.150168
2013-08-13 19:50:42	408.85	30.95	-109.5	13.187	0.126202	0.144798
2013-08-14 07:53:49	406.18	28.28	-112.17	13.6892	0.113365	0.127812
2013-08-14 12:30:46	405.28	27.38	-113.07	13.8815	0.109038	0.112486
2013-08-14 17:59:02	404.24	26.34	-114.11	14.1095	0.104038	0.109666
2013-08-14 18:19:01	404.18	26.28	-114.17	14.1233	0.10375	0.103991
2013-08-15 11:08:56	401.23	23.33	-117.12	14.8247	0.0895673	0.101113
2013-08-15 16:31:51	400.47	22.57	-117.88	15.0489	0.0859135	0.0814691
2013-08-15 19:16:37	400.04	22.14	-118.31	15.1633	0.0838462	0.0903311
2013-08-16 08:58:15	398.15	20.25	-120.2	15.7339	0.0747596	0.0796265
2013-08-16 12:38:28	397.68	19.78	-120.67	15.8868	0.0725	0.0738789
2013-08-16 19:21:41	396.78	18.88	-121.57	16.1668	0.0681731	0.077264
2013-08-17 09:23:46	395.02	17.12	-123.33	16.7516	0.0597115	0.0723477
2013-08-17 14:42:53	394.43	16.53	-123.92	16.9732	0.056875	0.0639984
2013-08-17 19:22:35	393.93	16.03	-124.42	17.1675	0.0544712	0.0618809
2013-08-18 09:13:57	392.54	14.64	-125.81	17.7448	0.0477885	0.0578747
2013-08-18 19:52:50	391.5	13.6	-126.85	18.1885	0.0427885	0.0563478
2013-08-19 08:13:53	390.38	12.48	-127.97	18.7031	0.0374038	0.0523169
2013-08-19 15:22:18	389.78	11.88	-128.57	19.0006	0.0345192	0.0484799
2013-08-19 22:09:54	389.18	11.28	-129.17	19.2837	0.0316346	0.0509549
2013-08-20 07:40:05	388.31	10.41	-130.04	19.6796	0.0274519	0.052817
2013-08-20 19:05:23	387.27	9.37	-131.08	20.1555	0.0224519	0.0525308
2013-08-21 07:56:56	386.05	8.15	-132.3	20.6913	0.0165865	0.0547348
2013-08-21 20:32:15	384.99	7.09	-133.36	21.2159	0.0114904	0.0485793
2013-08-22 08:33:38	384.14	6.24	-134.21	21.7168	0.00740385	0.0407873
2013-08-22 14:30:47	383.75	5.85	-134.6	21.9648	0.00552885	0.0377983
2013-08-22 17:32:26	383.55	5.65	-134.8	22.091	0.00456731	0.0381113
2013-08-22 21:19:00	383.368	5.46784		22.2483	0.00369152	0.0278332

## Sheet: Tensionen
Datum / Zeit	Tension unten [hPa]	Tension oben [hPa]	Zeit [d]	Zeit [d]	MP bot(2) [cm]	MP top(1) [cm]		WÄGUNG START
41486.6	2.4	4.8		0.00405093	-2.44648	-4.89297	41486.6	41486.6
2013-07-31 15:28:15	1.8	4.32		0.00474537	-1.83486	-4.40367
2013-07-31 15:29:15	1.9	4.4		0.00543981	-1.9368	-4.48522	2013-07-31 15:29:15
2013-07-31 15:31:15	1.98	4.46		0.0068287	-2.01835	-4.54638
2013-07-31 15:32:15	2.03	4.5		0.00752315	-2.06932	-4.58716
2013-07-31 15:33:15	2.06	4.53		0.00821759	-2.0999	-4.61774
2013-07-31 15:34:15	2.05	4.53		0.00891204	-2.0897	-4.61774
2013-07-31 15:35:15	2.05	4.52		0.00960648	-2.0897	-4.60754
2013-07-31 15:37:15	2.07	4.52		0.0109954	-2.11009	-4.60754
2013-07-31 15:38:15	2.05	4.5		0.0116898	-2.0897	-4.58716
2013-07-31 15:39:15	2.06	4.52		0.0123843	-2.0999	-4.60754
2013-07-31 15:40:15	2.05	4.5		0.0130787	-2.0897	-4.58716
2013-07-31 15:41:15	2.05	4.49		0.0137731	-2.0897	-4.57696
2013-07-31 15:42:15	2.05	4.5		0.0144676	-2.0897	-4.58716
2013-07-31 15:43:15	2.05	4.49		0.015162	-2.0897	-4.57696
2013-07-31 15:44:15	2.06	4.5		0.0158565	-2.0999	-4.58716
2013-07-31 15:45:15	2.07	4.5		0.0165509	-2.11009	-4.58716
2013-07-31 15:46:15	2.05	4.49		0.0172454	-2.0897	-4.57696
2013-07-31 15:47:15	2.04	4.48		0.0179398	-2.07951	-4.56677
2013-07-31 15:48:15	2.06	4.5		0.0186343	-2.0999	-4.58716
2013-07-31 15:49:15	2.06	4.5		0.0193287	-2.0999	-4.58716
2013-07-31 15:59:15	2.07	4.49		0.0262731	-2.11009	-4.57696
2013-07-31 16:09:15	2.1	4.53		0.0332176	-2.14067	-4.61774
2013-07-31 16:19:15	2.1	4.53		0.040162	-2.14067	-4.61774
2013-07-31 16:29:15	2.13	4.55		0.0471065	-2.17125	-4.63812	2013-07-31 16:29:15
2013-07-31 16:39:15	2.14	4.57		0.0540509	-2.18145	-4.65851
2013-07-31 16:49:15	2.13	4.55		0.0609954	-2.17125	-4.63812
2013-07-31 16:59:15	2.15	4.58		0.0679398	-2.19164	-4.66871
2013-07-31 17:09:15	2.17	4.59		0.0748843	-2.21203	-4.6789
2013-07-31 17:19:15	2.2	4.62		0.0818287	-2.24261	-4.70948
2013-07-31 17:29:15	2.22	4.64		0.0887731	-2.263	-4.72987	2013-07-31 17:29:15
2013-07-31 17:39:15	2.23	4.65		0.0957176	-2.27319	-4.74006
2013-07-31 17:49:15	2.26	4.69		0.102662	-2.30377	-4.78084
2013-07-31 17:59:15	2.28	4.7		0.109606	-2.32416	-4.79103
2013-07-31 18:09:15	2.3	4.73		0.116551	-2.34455	-4.82161
2013-07-31 18:19:15	2.31	4.75		0.123495	-2.35474	-4.842
2013-07-31 18:29:15	2.34	4.77		0.13044	-2.38532	-4.86239	2013-07-31 18:29:15
2013-07-31 18:39:15	2.36	4.79		0.137384	-2.40571	-4.88277
2013-07-31 18:49:15	2.38	4.81		0.144329	-2.4261	-4.90316
2013-07-31 18:59:15	2.39	4.83		0.151273	-2.43629	-4.92355
2013-07-31 19:09:15	2.41	4.84		0.158218	-2.45668	-4.93374
2013-07-31 19:19:15	2.44	4.86		0.165162	-2.48726	-4.95413
2013-07-31 19:29:15	2.43	4.87		0.172106	-2.47706	-4.96432	2013-07-31 19:29:15
2013-07-31 19:39:15	2.43	4.86		0.179051	-2.47706	-4.95413
2013-07-31 19:49:15	2.45	4.89		0.185995	-2.49745	-4.98471
2013-07-31 19:59:15	2.47	4.9		0.19294	-2.51784	-4.9949
2013-07-31 20:09:15	2.48	4.92		0.199884	-2.52803	-5.01529
2013-07-31 20:19:15	2.51	4.94		0.206829	-2.55861	-5.03568
2013-07-31 20:29:15	2.47	4.9		0.213773	-2.51784	-4.9949	2013-07-31 20:29:15
2013-07-31 20:39:15	2.5	4.94		0.220718	-2.54842	-5.03568
2013-07-31 20:49:15	2.53	4.95		0.227662	-2.579	-5.04587
2013-07-31 20:59:15	2.54	4.98		0.234606	-2.58919	-5.07645
2013-07-31 21:09:15	2.56	4.99		0.241551	-2.60958	-5.08665
2013-07-31 21:19:15	2.52	4.96		0.248495	-2.56881	-5.05607
2013-07-31 21:29:15	2.53	4.97		0.25544	-2.579	-5.06626	2013-07-31 21:29:15
2013-07-31 21:39:15	2.55	4.98		0.262384	-2.59939	-5.07645
2013-07-31 21:49:15	2.58	5.01		0.269329	-2.62997	-5.10703
2013-07-31 21:59:15	2.58	5.02		0.276273	-2.62997	-5.11723
2013-07-31 22:09:15	2.6	5.03		0.283218	-2.65036	-5.12742
2013-07-31 22:19:15	2.63	5.06		0.290162	-2.68094	-5.158
2013-07-31 22:29:15	2.6	5.04		0.297106	-2.65036	-5.13761	2013-07-31 22:29:15
2013-07-31 22:39:15	2.64	5.07		0.304051	-2.69113	-5.1682
2013-07-31 22:49:15	2.66	5.1		0.310995	-2.71152	-5.19878
2013-07-31 22:59:15	2.67	5.1		0.31794	-2.72171	-5.19878
2013-07-31 23:09:15	2.69	5.13		0.324884	-2.7421	-5.22936
2013-07-31 23:19:15	2.72	5.16		0.331829	-2.77268	-5.25994
2013-07-31 23:29:15	2.74	5.17		0.338773	-2.79307	-5.27013	2013-07-31 23:29:15
2013-07-31 23:39:15	2.77	5.18		0.345718	-2.82365	-5.28033
2013-07-31 23:49:15	2.78	5.2		0.352662	-2.83384	-5.30071
2013-07-31 23:59:15	2.79	5.23		0.359606	-2.84404	-5.33129
2013-08-01 00:09:15	2.78	5.21		0.366551	-2.83384	-5.31091
2013-08-01 00:19:15	2.79	5.24		0.373495	-2.84404	-5.34149
2013-08-01 00:29:15	2.84	5.25		0.38044	-2.89501	-5.35168	2013-08-01 00:29:15
2013-08-01 00:39:15	2.82	5.26		0.387384	-2.87462	-5.36188
2013-08-01 00:49:15	2.85	5.29		0.394329	-2.9052	-5.39246
2013-08-01 00:59:15	2.87	5.32		0.401273	-2.92559	-5.42304
2013-08-01 01:09:15	2.91	5.33		0.408218	-2.96636	-5.43323
2013-08-01 01:19:15	2.93	5.36		0.415162	-2.98675	-5.46381
2013-08-01 01:29:15	2.96	5.37		0.422106	-3.01733	-5.47401	2013-08-01 01:29:15
2013-08-01 01:39:15	2.98	5.41		0.429051	-3.03772	-5.51478
2013-08-01 01:49:15	2.97	5.41		0.435995	-3.02752	-5.51478
2013-08-01 01:59:15	3.01	5.43		0.44294	-3.0683	-5.53517
2013-08-01 02:09:15	3.02	5.44		0.449884	-3.07849	-5.54536
2013-08-01 02:19:15	3.05	5.47		0.456829	-3.10907	-5.57594
2013-08-01 02:29:15	3.06	5.5		0.463773	-3.11927	-5.60652	2013-08-01 02:29:15
2013-08-01 02:39:15	3.09	5.52		0.470718	-3.14985	-5.62691
2013-08-01 02:49:15	3.09	5.53		0.477662	-3.14985	-5.6371
2013-08-01 02:59:15	3.13	5.56		0.484606	-3.19062	-5.66769
2013-08-01 03:09:15	3.15	5.57		0.491551	-3.21101	-5.67788
2013-08-01 03:19:15	3.15	5.58		0.498495	-3.21101	-5.68807
2013-08-01 03:29:15	3.16	5.59		0.50544	-3.2212	-5.69827	2013-08-01 03:29:15
2013-08-01 03:39:15	3.2	5.62		0.512384	-3.26198	-5.72885
2013-08-01 03:49:15	3.22	5.65		0.519329	-3.28236	-5.75943
2013-08-01 03:59:15	3.23	5.66		0.526273	-3.29256	-5.76962
2013-08-01 04:09:15	3.19	5.61		0.533218	-3.25178	-5.71865
2013-08-01 04:19:15	3.23	5.65		0.540162	-3.29256	-5.75943
2013-08-01 04:29:15	3.26	5.69		0.547106	-3.32314	-5.8002	2013-08-01 04:29:15
2013-08-01 04:39:15	3.29	5.72		0.554051	-3.35372	-5.83078
2013-08-01 04:49:15	3.31	5.73		0.560995	-3.37411	-5.84098
2013-08-01 04:59:15	3.33	5.75		0.56794	-3.3945	-5.86137
2013-08-01 05:09:15	3.35	5.77		0.574884	-3.41488	-5.88175
2013-08-01 05:19:15	3.34	5.77		0.581829	-3.40469	-5.88175
2013-08-01 05:29:15	3.37	5.8		0.588773	-3.43527	-5.91233	2013-08-01 05:29:15
2013-08-01 05:39:15	3.38	5.81		0.595718	-3.44546	-5.92253
2013-08-01 05:49:15	3.39	5.81		0.602662	-3.45566	-5.92253
2013-08-01 05:59:15	3.42	5.84		0.609606	-3.48624	-5.95311
2013-08-01 06:09:15	3.44	5.88		0.616551	-3.50663	-5.99388
2013-08-01 06:19:15	3.39	5.81		0.623495	-3.45566	-5.92253
2013-08-01 06:29:15	3.42	5.85		0.63044	-3.48624	-5.9633	2013-08-01 06:29:15
2013-08-01 06:49:15	3.47	5.9		0.644329	-3.53721	-6.01427
2013-08-01 06:59:15	3.48	5.91		0.651273	-3.5474	-6.02446
2013-08-01 07:09:15	3.47	5.89		0.658218	-3.53721	-6.00408
2013-08-01 07:19:15	3.44	5.86		0.665162	-3.50663	-5.9735
2013-08-01 07:29:15	3.47	5.89		0.672106	-3.53721	-6.00408
2013-08-01 07:39:15	3.34	5.76		0.679051	-3.40469	-5.87156	2013-08-01 07:39:15
2013-08-01 07:49:15	3.34	5.79		0.685995	-3.40469	-5.90214
2013-08-01 07:59:15	3.36	5.79		0.69294	-3.42508	-5.90214
2013-08-01 08:09:15	3.41	5.84		0.699884	-3.47604	-5.95311
2013-08-01 08:19:15	3.44	5.87		0.706829	-3.50663	-5.98369
2013-08-01 08:29:15	3.47	5.9		0.713773	-3.53721	-6.01427
2013-08-01 08:39:15	3.5	5.93		0.720718	-3.56779	-6.04485	2013-08-01 08:39:15
2013-08-01 08:49:15	3.52	5.96		0.727662	-3.58818	-6.07543
2013-08-01 08:59:15	3.54	5.97		0.734606	-3.60856	-6.08563
2013-08-01 09:09:15	3.56	6		0.741551	-3.62895	-6.11621
2013-08-01 09:19:15	3.59	6.02		0.748495	-3.65953	-6.1366
2013-08-01 09:29:15	3.62	6.04		0.75544	-3.69011	-6.15698
2013-08-01 09:39:15	3.64	6.07		0.762384	-3.7105	-6.18756	2013-08-01 09:39:15
2013-08-01 09:49:15	3.67	6.11		0.769329	-3.74108	-6.22834
2013-08-01 09:59:15	3.64	6.06		0.776273	-3.7105	-6.17737
2013-08-01 10:19:15	3.7	6.14		0.790162	-3.77166	-6.25892
2013-08-01 10:39:15	3.67	6.09		0.804051	-3.74108	-6.20795
2013-08-01 10:49:15	3.68	6.11		0.810995	-3.75127	-6.22834
2013-08-01 10:59:15	3.7	6.14		0.81794	-3.77166	-6.25892	2013-08-01 10:59:15
2013-08-01 11:09:15	3.58	6		0.824884	-3.64934	-6.11621
2013-08-01 11:19:15	3.62	6.07		0.831829	-3.69011	-6.18756
2013-08-01 11:29:15	3.67	6.1		0.838773	-3.74108	-6.21814
2013-08-01 11:49:15	3.73	6.18		0.852662	-3.80224	-6.29969
2013-08-01 11:59:15	3.69	6.12		0.859606	-3.76147	-6.23853
2013-08-01 12:09:15	3.74	6.17		0.866551	-3.81244	-6.2895	2013-08-01 12:09:15
2013-08-01 12:19:15	3.76	6.18		0.873495	-3.83282	-6.29969
2013-08-01 12:29:15	3.79	6.21		0.88044	-3.8634	-6.33028
2013-08-01 12:39:15	3.8	6.23		0.887384	-3.8736	-6.35066
2013-08-01 12:49:15	3.83	6.25		0.894329	-3.90418	-6.37105
2013-08-01 12:59:15	3.85	6.29		0.901273	-3.92457	-6.41182
2013-08-01 13:09:15	3.88	6.31		0.908218	-3.95515	-6.43221	2013-08-01 13:09:15
2013-08-01 13:19:15	3.86	6.29		0.915162	-3.93476	-6.41182
2013-08-01 13:29:15	3.89	6.33		0.922106	-3.96534	-6.4526
2013-08-01 13:39:15	3.91	6.34		0.929051	-3.98573	-6.46279
2013-08-01 13:49:15	3.95	6.37		0.935995	-4.0265	-6.49337
2013-08-01 13:59:15	3.98	6.39		0.94294	-4.05708	-6.51376
2013-08-01 14:09:15	3.97	6.4		0.949884	-4.04689	-6.52396	2013-08-01 14:09:15
2013-08-01 14:19:15	3.97	6.45		0.956829	-4.04689	-6.57492
2013-08-01 14:29:15	4.01	6.44		0.963773	-4.08767	-6.56473
2013-08-01 14:39:15	4.02	6.45		0.970718	-4.09786	-6.57492
2013-08-01 14:49:15	3.99	6.42		0.977662	-4.06728	-6.54434
2013-08-01 14:59:15	4.03	6.46		0.984606	-4.10805	-6.58512
2013-08-01 15:09:15	4.06	6.48		0.991551	-4.13863	-6.6055	2013-08-01 15:09:15
2013-08-01 15:19:15	4.07	6.51		0.998495	-4.14883	-6.63609
2013-08-01 15:29:15	4.1	6.53		1.00544	-4.17941	-6.65647
2013-08-01 15:39:15	4.11	6.55		1.01238	-4.1896	-6.67686
2013-08-01 15:49:15	4.12	6.55		1.01933	-4.1998	-6.67686
2013-08-01 15:59:15	4.13	6.57		1.02627	-4.20999	-6.69725
2013-08-01 16:09:15	4.16	6.59		1.03322	-4.24057	-6.71764	2013-08-01 16:09:15
2013-08-01 16:19:15	4.18	6.61		1.04016	-4.26096	-6.73802
2013-08-01 16:29:15	4.21	6.65		1.04711	-4.29154	-6.7788
2013-08-01 16:39:15	4.22	6.67		1.05405	-4.30173	-6.79918
2013-08-01 16:49:15	4.22	6.66		1.061	-4.30173	-6.78899
2013-08-01 16:59:15	4.25	6.68		1.06794	-4.33231	-6.80938
2013-08-01 17:09:15	4.27	6.71		1.07488	-4.3527	-6.83996	2013-08-01 17:09:15
2013-08-01 17:19:15	4.3	6.74		1.08183	-4.38328	-6.87054
2013-08-01 17:29:15	4.29	6.72		1.08877	-4.37309	-6.85015
2013-08-01 17:39:15	4.24	6.68		1.09572	-4.32212	-6.80938
2013-08-01 17:49:15	4.3	6.72		1.10266	-4.38328	-6.85015
2013-08-01 17:59:15	4.33	6.76		1.10961	-4.41386	-6.89093
2013-08-01 18:09:15	4.36	6.79		1.11655	-4.44444	-6.92151	2013-08-01 18:09:15
2013-08-01 18:19:15	4.37	6.81		1.1235	-4.45464	-6.9419
2013-08-01 18:29:15	4.34	6.77		1.13044	-4.42406	-6.90112
2013-08-01 18:39:15	4.38	6.8		1.13738	-4.46483	-6.9317
2013-08-01 18:49:15	4.4	6.83		1.14433	-4.48522	-6.96228
2013-08-01 18:59:15	4.43	6.85		1.15127	-4.5158	-6.98267
2013-08-01 19:09:15	4.45	6.88		1.15822	-4.53619	-7.01325	2013-08-01 19:09:15
2013-08-01 19:19:15	4.47	6.91		1.16516	-4.55657	-7.04383
2013-08-01 19:29:15	4.48	6.92		1.17211	-4.56677	-7.05403
2013-08-01 19:39:15	4.5	6.93		1.17905	-4.58716	-7.06422
2013-08-01 19:49:15	4.53	6.97		1.186	-4.61774	-7.10499
2013-08-01 19:59:15	4.56	6.99		1.19294	-4.64832	-7.12538
2013-08-01 20:09:15	4.58	7.01		1.19988	-4.66871	-7.14577	2013-08-01 20:09:15
2013-08-01 20:19:15	4.4	6.82		1.20683	-4.48522	-6.95209
2013-08-01 20:29:15	4.45	6.9		1.21377	-4.53619	-7.03364
2013-08-01 20:39:15	4.51	6.95		1.22072	-4.59735	-7.08461
2013-08-01 20:49:15	4.56	6.99		1.22766	-4.64832	-7.12538
2013-08-01 21:09:15	4.6	7.04		1.24155	-4.68909	-7.17635
2013-08-01 21:19:15	4.61	7.04		1.2485	-4.69929	-7.17635	2013-08-01 21:19:15
2013-08-01 21:29:15	4.64	7.06		1.25544	-4.72987	-7.19674
2013-08-01 21:39:15	4.67	7.09		1.26238	-4.76045	-7.22732
2013-08-01 21:49:15	4.7	7.11		1.26933	-4.79103	-7.24771
2013-08-01 21:59:15	4.72	7.14		1.27627	-4.81142	-7.27829
2013-08-01 22:09:15	4.73	7.16		1.28322	-4.82161	-7.29867
2013-08-01 22:19:15	4.75	7.17		1.29016	-4.842	-7.30887	2013-08-01 22:19:15
2013-08-01 22:29:15	4.77	7.18		1.29711	-4.86239	-7.31906
2013-08-01 22:39:15	4.79	7.2		1.30405	-4.88277	-7.33945
2013-08-01 22:49:15	4.78	7.19		1.311	-4.87258	-7.32926
2013-08-01 22:59:15	4.8	7.22		1.31794	-4.89297	-7.35984
2013-08-01 23:09:15	4.82	7.25		1.32488	-4.91335	-7.39042
2013-08-01 23:19:15	4.83	7.26		1.33183	-4.92355	-7.40061	2013-08-01 23:19:15
2013-08-01 23:29:15	4.8	7.22		1.33877	-4.89297	-7.35984
2013-08-01 23:39:15	4.83	7.26		1.34572	-4.92355	-7.40061
2013-08-01 23:49:15	4.84	7.28		1.35266	-4.93374	-7.421
2013-08-01 23:59:15	4.87	7.3		1.35961	-4.96432	-7.44139
2013-08-02 00:09:15	4.88	7.31		1.36655	-4.97452	-7.45158
2013-08-02 00:19:15	4.89	7.32		1.3735	-4.98471	-7.46177	2013-08-02 00:19:15
2013-08-02 00:29:15	4.82	7.23		1.38044	-4.91335	-7.37003
2013-08-02 00:49:15	4.89	7.3		1.39433	-4.98471	-7.44139
2013-08-02 00:59:15	4.91	7.34		1.40127	-5.0051	-7.48216
2013-08-02 01:09:15	4.92	7.35		1.40822	-5.01529	-7.49235
2013-08-02 01:19:15	4.95	7.35		1.41516	-5.04587	-7.49235
2013-08-02 01:29:15	4.95	7.38		1.42211	-5.04587	-7.52294	2013-08-02 01:29:15
2013-08-02 01:49:15	4.88	7.32		1.436	-4.97452	-7.46177
2013-08-02 01:59:15	4.93	7.35		1.44294	-5.02548	-7.49235
2013-08-02 02:09:15	4.95	7.38		1.44988	-5.04587	-7.52294
2013-08-02 02:19:15	4.98	7.41		1.45683	-5.07645	-7.55352
2013-08-02 02:29:15	4.99	7.43		1.46377	-5.08665	-7.5739
2013-08-02 02:39:15	4.96	7.37		1.47072	-5.05607	-7.51274	2013-08-02 02:39:15
2013-08-02 02:49:15	4.96	7.39		1.47766	-5.05607	-7.53313
2013-08-02 02:59:15	4.97	7.41		1.48461	-5.06626	-7.55352
2013-08-02 03:09:15	4.99	7.41		1.49155	-5.08665	-7.55352
2013-08-02 03:19:15	4.99	7.43		1.4985	-5.08665	-7.5739
2013-08-02 03:29:15	5.01	7.44		1.50544	-5.10703	-7.5841
2013-08-02 03:39:15	5.02	7.45		1.51238	-5.11723	-7.59429	2013-08-02 03:39:15
2013-08-02 03:49:15	4.99	7.42		1.51933	-5.08665	-7.56371
2013-08-02 03:59:15	5.03	7.47		1.52627	-5.12742	-7.61468
2013-08-02 04:09:15	5.04	7.47		1.53322	-5.13761	-7.61468
2013-08-02 04:19:15	5.08	7.5		1.54016	-5.17839	-7.64526
2013-08-02 04:29:15	5.03	7.47		1.54711	-5.12742	-7.61468
2013-08-02 04:39:15	5.08	7.51		1.55405	-5.17839	-7.65545	2013-08-02 04:39:15
2013-08-02 04:49:15	5.08	7.51		1.561	-5.17839	-7.65545
2013-08-02 04:59:15	5.09	7.52		1.56794	-5.18858	-7.66565
2013-08-02 05:09:15	5.11	7.54		1.57488	-5.20897	-7.68603
2013-08-02 05:19:15	5.11	7.54		1.58183	-5.20897	-7.68603
2013-08-02 05:29:15	5.13	7.56		1.58877	-5.22936	-7.70642
2013-08-02 05:39:15	5.13	7.55		1.59572	-5.22936	-7.69623	2013-08-02 05:39:15
2013-08-02 05:49:15	5.15	7.58		1.60266	-5.24975	-7.72681
2013-08-02 05:59:15	5.16	7.6		1.60961	-5.25994	-7.7472
2013-08-02 06:09:15	5.17	7.61		1.61655	-5.27013	-7.75739
2013-08-02 06:19:15	5.18	7.61		1.6235	-5.28033	-7.75739
2013-08-02 06:29:15	5.19	7.63		1.63044	-5.29052	-7.77778
2013-08-02 06:39:15	5.2	7.64		1.63738	-5.30071	-7.78797	2013-08-02 06:39:15
2013-08-02 06:49:15	5.22	7.64		1.64433	-5.3211	-7.78797
2013-08-02 06:59:15	5.2	7.64		1.65127	-5.30071	-7.78797
2013-08-02 07:09:15	5.23	7.66		1.65822	-5.33129	-7.80836
2013-08-02 07:19:15	5.22	7.66		1.66516	-5.3211	-7.80836
2013-08-02 07:29:15	5.26	7.68		1.67211	-5.36188	-7.82875
2013-08-02 07:39:15	5.24	7.67		1.67905	-5.34149	-7.81855	2013-08-02 07:39:15
2013-08-02 07:49:15	5.26	7.7		1.686	-5.36188	-7.84913
2013-08-02 07:59:15	5.27	7.71		1.69294	-5.37207	-7.85933
2013-08-02 08:09:15	5.28	7.72		1.69988	-5.38226	-7.86952
2013-08-02 08:19:15	5.3	7.72		1.70683	-5.40265	-7.86952
2013-08-02 08:29:15	5.28	7.71		1.71377	-5.38226	-7.85933
2013-08-02 08:39:15	5.22	7.67		1.72072	-5.3211	-7.81855	2013-08-02 08:39:15
2013-08-02 08:49:15	5.27	7.7		1.72766	-5.37207	-7.84913
2013-08-02 08:59:15	5.29	7.72		1.73461	-5.39246	-7.86952
2013-08-02 09:09:15	5.32	7.76		1.74155	-5.42304	-7.9103
2013-08-02 09:19:15	5.35	7.79		1.7485	-5.45362	-7.94088
2013-08-02 09:29:15	5.37	7.81		1.75544	-5.47401	-7.96126
2013-08-02 09:39:15	5.4	7.81		1.76238	-5.50459	-7.96126	2013-08-02 09:39:15
2013-08-02 09:49:15	5.4	7.84		1.76933	-5.50459	-7.99185
2013-08-02 09:59:15	5.42	7.85		1.77627	-5.52497	-8.00204
2013-08-02 10:09:15	5.43	7.87		1.78322	-5.53517	-8.02243
2013-08-02 10:19:15	5.42	7.85		1.79016	-5.52497	-8.00204
2013-08-02 10:29:15	5.44	7.87		1.79711	-5.54536	-8.02243
2013-08-02 10:39:15	5.44	7.87		1.80405	-5.54536	-8.02243	2013-08-02 10:39:15
2013-08-02 10:49:15	5.46	7.89		1.811	-5.56575	-8.04281
2013-08-02 10:59:15	5.47	7.91		1.81794	-5.57594	-8.0632
2013-08-02 11:09:15	5.49	7.93		1.82488	-5.59633	-8.08359
2013-08-02 11:19:15	5.49	7.92		1.83183	-5.59633	-8.07339
2013-08-02 11:29:15	5.51	7.95		1.83877	-5.61672	-8.10398
2013-08-02 11:39:15	5.54	7.97		1.84572	-5.6473	-8.12436	2013-08-02 11:39:15
2013-08-02 11:49:15	5.55	7.98		1.85266	-5.65749	-8.13456
2013-08-02 11:59:15	5.56	7.99		1.85961	-5.66769	-8.14475
2013-08-02 12:09:15	5.56	8		1.86655	-5.66769	-8.15494
2013-08-02 12:19:15	5.58	8.01		1.8735	-5.68807	-8.16514
2013-08-02 12:29:15	5.59	8.02		1.88044	-5.69827	-8.17533
2013-08-02 12:49:15	5.56	7.98		1.89433	-5.66769	-8.13456	2013-08-02 12:49:15
2013-08-02 12:59:15	5.62	8.04		1.90127	-5.72885	-8.19572
2013-08-02 13:09:15	5.63	8.07		1.90822	-5.73904	-8.2263
2013-08-02 13:19:15	5.66	8.09		1.91516	-5.76962	-8.24669
2013-08-02 13:29:15	5.67	8.11		1.92211	-5.77982	-8.26707
2013-08-02 13:39:15	5.69	8.13		1.92905	-5.8002	-8.28746
2013-08-02 13:49:15	5.71	8.15		1.936	-5.82059	-8.30785	2013-08-02 13:49:15
2013-08-02 13:59:15	5.72	8.16		1.94294	-5.83078	-8.31804
2013-08-02 14:09:15	5.68	8.11		1.94988	-5.79001	-8.26707
2013-08-02 14:19:15	5.72	8.16		1.95683	-5.83078	-8.31804
2013-08-02 14:29:15	5.75	8.19		1.96377	-5.86137	-8.34862
2013-08-02 14:39:15	5.72	8.15		1.97072	-5.83078	-8.30785
2013-08-02 14:49:15	5.71	8.15		1.97766	-5.82059	-8.30785	2013-08-02 14:49:15
2013-08-02 14:59:15	5.7	8.13		1.98461	-5.8104	-8.28746
2013-08-02 15:09:15	5.72	8.16		1.99155	-5.83078	-8.31804
2013-08-02 15:19:15	5.75	8.19		1.9985	-5.86137	-8.34862
2013-08-02 15:29:15	5.77	8.2		2.00544	-5.88175	-8.35882
2013-08-02 15:39:15	5.75	8.19		2.01238	-5.86137	-8.34862
2013-08-02 15:49:15	5.8	8.24		2.01933	-5.91233	-8.39959	2013-08-02 15:49:15
2013-08-02 15:59:15	5.81	8.25		2.02627	-5.92253	-8.40979
2013-08-02 16:09:15	5.84	8.27		2.03322	-5.95311	-8.43017
2013-08-02 16:19:15	5.87	8.3		2.04016	-5.98369	-8.46075
2013-08-02 16:29:15	5.88	8.31		2.04711	-5.99388	-8.47095
2013-08-02 16:39:15	5.9	8.34		2.05405	-6.01427	-8.50153
2013-08-02 16:49:15	5.93	8.35		2.061	-6.04485	-8.51172	2013-08-02 16:49:15
2013-08-02 17:09:15	5.94	8.38		2.07488	-6.05505	-8.5423
2013-08-02 17:19:15	5.95	8.4		2.08183	-6.06524	-8.56269
2013-08-02 17:39:15	6	8.42		2.09572	-6.11621	-8.58308
2013-08-02 17:49:15	6.01	8.44		2.10266	-6.1264	-8.60347
2013-08-02 17:59:15	6.03	8.46		2.10961	-6.14679	-8.62385
2013-08-02 18:09:15	6.05	8.49		2.11655	-6.16718	-8.65443	2013-08-02 18:09:15
2013-08-02 18:19:15	6.05	8.48		2.1235	-6.16718	-8.64424
2013-08-02 18:29:15	6.06	8.5		2.13044	-6.17737	-8.66463
2013-08-02 18:39:15	6.11	8.53		2.13738	-6.22834	-8.69521
2013-08-02 18:49:15	5.99	8.43		2.14433	-6.10601	-8.59327
2013-08-02 18:59:15	6.09	8.52		2.15127	-6.20795	-8.68502
2013-08-02 19:09:15	6.1	8.54		2.15822	-6.21814	-8.7054	2013-08-02 19:09:15
2013-08-02 19:19:15	6.12	8.56		2.16516	-6.23853	-8.72579
2013-08-02 19:29:15	6.14	8.55		2.17211	-6.25892	-8.7156
2013-08-02 19:39:15	6.15	8.59		2.17905	-6.26911	-8.75637
2013-08-02 19:49:15	6.19	8.61		2.186	-6.30989	-8.77676
2013-08-02 19:59:15	6.24	8.66		2.19294	-6.36086	-8.82773
2013-08-02 20:09:15	6.25	8.66		2.19988	-6.37105	-8.82773	2013-08-02 20:09:15
2013-08-02 20:19:15	6.28	8.69		2.20683	-6.40163	-8.85831
2013-08-02 20:29:15	6.28	8.69		2.21377	-6.40163	-8.85831
2013-08-02 20:39:15	6.3	8.72		2.22072	-6.42202	-8.88889
2013-08-02 20:49:15	6.34	8.74		2.22766	-6.46279	-8.90928
2013-08-02 20:59:15	6.32	8.74		2.23461	-6.44241	-8.90928
2013-08-02 21:09:15	6.33	8.75		2.24155	-6.4526	-8.91947	2013-08-02 21:09:15
2013-08-02 21:19:15	6.36	8.78		2.2485	-6.48318	-8.95005
2013-08-02 21:29:15	6.38	8.81		2.25544	-6.50357	-8.98063
2013-08-02 21:39:15	6.39	8.81		2.26238	-6.51376	-8.98063
2013-08-02 21:49:15	6.41	8.84		2.26933	-6.53415	-9.01121
2013-08-02 21:59:15	6.43	8.86		2.27627	-6.55454	-9.0316
2013-08-02 22:09:15	6.46	8.87		2.28322	-6.58512	-9.04179	2013-08-02 22:09:15
2013-08-02 22:19:15	6.47	8.89		2.29016	-6.59531	-9.06218
2013-08-02 22:29:15	6.46	8.89		2.29711	-6.58512	-9.06218
2013-08-02 22:39:15	6.43	8.85		2.30405	-6.55454	-9.02141
2013-08-02 22:49:15	6.44	8.86		2.311	-6.56473	-9.0316
2013-08-02 22:59:15	6.46	8.88		2.31794	-6.58512	-9.05199
2013-08-02 23:09:15	6.48	8.9		2.32488	-6.6055	-9.07238	2013-08-02 23:09:15
2013-08-02 23:19:15	6.49	8.91		2.33183	-6.6157	-9.08257
2013-08-02 23:29:15	6.49	8.92		2.33877	-6.6157	-9.09276
2013-08-02 23:39:15	6.51	8.94		2.34572	-6.63609	-9.11315
2013-08-02 23:49:15	6.52	8.95		2.35266	-6.64628	-9.12334
2013-08-02 23:59:15	6.55	8.96		2.35961	-6.67686	-9.13354
2013-08-03 00:09:15	6.56	8.97		2.36655	-6.68705	-9.14373	2013-08-03 00:09:15
2013-08-03 00:19:15	6.56	8.99		2.3735	-6.68705	-9.16412
2013-08-03 00:29:15	6.57	9		2.38044	-6.69725	-9.17431
2013-08-03 00:39:15	6.6	9.03		2.38738	-6.72783	-9.20489
2013-08-03 00:49:15	6.61	9.04		2.39433	-6.73802	-9.21509
2013-08-03 00:59:15	6.62	9.04		2.40127	-6.74822	-9.21509
2013-08-03 01:09:15	6.63	9.06		2.40822	-6.75841	-9.23547	2013-08-03 01:09:15
2013-08-03 01:19:15	6.64	9.07		2.41516	-6.7686	-9.24567
2013-08-03 01:29:15	6.65	9.09		2.42211	-6.7788	-9.26606
2013-08-03 01:39:15	6.66	9.09		2.42905	-6.78899	-9.26606
2013-08-03 01:49:15	6.67	9.09		2.436	-6.79918	-9.26606
2013-08-03 01:59:15	6.68	9.12		2.44294	-6.80938	-9.29664
2013-08-03 02:09:15	6.69	9.12		2.44988	-6.81957	-9.29664	2013-08-03 02:09:15
2013-08-03 02:19:15	6.72	9.13		2.45683	-6.85015	-9.30683
2013-08-03 02:29:15	6.71	9.15		2.46377	-6.83996	-9.32722
2013-08-03 02:39:15	6.7	9.13		2.47072	-6.82977	-9.30683
2013-08-03 02:49:15	6.72	9.16		2.47766	-6.85015	-9.33741
2013-08-03 02:59:15	6.73	9.17		2.48461	-6.86035	-9.3476
2013-08-03 03:09:15	6.75	9.18		2.49155	-6.88073	-9.3578	2013-08-03 03:09:15
2013-08-03 03:19:15	6.76	9.19		2.4985	-6.89093	-9.36799
2013-08-03 03:29:15	6.79	9.21		2.50544	-6.92151	-9.38838
2013-08-03 03:39:15	6.79	9.22		2.51238	-6.92151	-9.39857
2013-08-03 03:49:15	6.81	9.25		2.51933	-6.9419	-9.42915
2013-08-03 03:59:15	6.81	9.26		2.52627	-6.9419	-9.43935
2013-08-03 04:09:15	6.81	9.25		2.53322	-6.9419	-9.42915	2013-08-03 04:09:15
2013-08-03 04:19:15	6.8	9.24		2.54016	-6.9317	-9.41896
2013-08-03 04:29:15	6.83	9.28		2.54711	-6.96228	-9.45973
2013-08-03 04:39:15	6.85	9.28		2.55405	-6.98267	-9.45973
2013-08-03 04:49:15	6.88	9.3		2.561	-7.01325	-9.48012
2013-08-03 04:59:15	6.84	9.28		2.56794	-6.97248	-9.45973
2013-08-03 05:09:15	6.86	9.31		2.57488	-6.99286	-9.49032	2013-08-03 05:09:15
2013-08-03 05:19:15	6.87	9.31		2.58183	-7.00306	-9.49032
2013-08-03 05:29:15	6.88	9.32		2.58877	-7.01325	-9.50051
2013-08-03 05:49:15	6.9	9.34		2.60266	-7.03364	-9.5209
2013-08-03 05:59:15	6.91	9.35		2.60961	-7.04383	-9.53109
2013-08-03 06:09:15	6.92	9.36		2.61655	-7.05403	-9.54128
2013-08-03 06:19:15	6.93	9.37		2.6235	-7.06422	-9.55148	2013-08-03 06:19:15
2013-08-03 06:29:15	6.95	9.39		2.63044	-7.08461	-9.57187
2013-08-03 06:39:15	6.96	9.39		2.63738	-7.0948	-9.57187
2013-08-03 06:49:15	6.98	9.42		2.64433	-7.11519	-9.60245
2013-08-03 06:59:15	6.95	9.4		2.65127	-7.08461	-9.58206
2013-08-03 07:09:15	6.77	9.23		2.65822	-6.90112	-9.40877
2013-08-03 07:19:15	6.86	9.33		2.66516	-6.99286	-9.5107	2013-08-03 07:19:15
2013-08-03 07:39:15	6.95	9.4		2.67905	-7.08461	-9.58206
2013-08-03 07:49:15	7.01	9.45		2.686	-7.14577	-9.63303
2013-08-03 07:59:15	7.02	9.47		2.69294	-7.15596	-9.65341
2013-08-03 08:19:15	7.06	9.53		2.70683	-7.19674	-9.71458
2013-08-03 08:29:15	7.07	9.52		2.71377	-7.20693	-9.70438
2013-08-03 08:39:15	7.1	9.55		2.72072	-7.23751	-9.73496	2013-08-03 08:39:15
2013-08-03 08:49:15	7.12	9.56		2.72766	-7.2579	-9.74516
2013-08-03 08:59:15	7.12	9.57		2.73461	-7.2579	-9.75535
2013-08-03 09:09:15	7.13	9.58		2.74155	-7.26809	-9.76555
2013-08-03 09:19:15	7.14	9.61		2.7485	-7.27829	-9.79613
2013-08-03 09:29:15	7.17	9.63		2.75544	-7.30887	-9.81651
2013-08-03 09:39:15	7.16	9.62		2.76238	-7.29867	-9.80632	2013-08-03 09:39:15
2013-08-03 09:49:15	7.19	9.64		2.76933	-7.32926	-9.82671
2013-08-03 09:59:15	7.2	9.66		2.77627	-7.33945	-9.84709
2013-08-03 10:09:15	7.21	9.66		2.78322	-7.34964	-9.84709
2013-08-03 10:19:15	7.22	9.67		2.79016	-7.35984	-9.85729
2013-08-03 10:29:15	7.22	9.67		2.79711	-7.35984	-9.85729
2013-08-03 10:39:15	7.23	9.69		2.80405	-7.37003	-9.87768	2013-08-03 10:39:15
2013-08-03 10:49:15	7.24	9.71		2.811	-7.38022	-9.89806
2013-08-03 10:59:15	7.29	9.75		2.81794	-7.43119	-9.93884
2013-08-03 11:09:15	7.28	9.75		2.82488	-7.421	-9.93884
2013-08-03 11:19:15	7.29	9.75		2.83183	-7.43119	-9.93884
2013-08-03 11:29:15	7.31	9.77		2.83877	-7.45158	-9.95923
2013-08-03 11:39:15	7.32	9.77		2.84572	-7.46177	-9.95923	2013-08-03 11:39:15
2013-08-03 11:49:15	7.33	9.79		2.85266	-7.47197	-9.97961
2013-08-03 11:59:15	7.34	9.8		2.85961	-7.48216	-9.98981
2013-08-03 12:09:15	7.34	9.8		2.86655	-7.48216	-9.98981
2013-08-03 12:19:15	7.37	9.82		2.8735	-7.51274	-10.0102
2013-08-03 12:29:15	7.37	9.84		2.88044	-7.51274	-10.0306
2013-08-03 12:39:15	7.39	9.85		2.88738	-7.53313	-10.0408	2013-08-03 12:39:15
2013-08-03 12:49:15	7.39	9.85		2.89433	-7.53313	-10.0408
2013-08-03 12:59:15	7.39	9.86		2.90127	-7.53313	-10.051
2013-08-03 13:09:15	7.43	9.88		2.90822	-7.5739	-10.0714
2013-08-03 13:19:15	7.43	9.9		2.91516	-7.5739	-10.0917
2013-08-03 13:29:15	7.45	9.91		2.92211	-7.59429	-10.1019
2013-08-03 13:39:15	7.46	9.91		2.92905	-7.60449	-10.1019	2013-08-03 13:39:15
2013-08-03 13:49:15	7.47	9.93		2.936	-7.61468	-10.1223
2013-08-03 13:59:15	7.48	9.95		2.94294	-7.62487	-10.1427
2013-08-03 14:09:15	7.5	9.96		2.94988	-7.64526	-10.1529
2013-08-03 14:19:15	7.51	9.97		2.95683	-7.65545	-10.1631
2013-08-03 14:29:15	7.54	10.01		2.96377	-7.68603	-10.2039
2013-08-03 14:39:15	7.55	10.02		2.97072	-7.69623	-10.2141	2013-08-03 14:39:15
2013-08-03 14:49:15	7.55	10.03		2.97766	-7.69623	-10.2243
2013-08-03 14:59:15	7.58	10.04		2.98461	-7.72681	-10.2345
2013-08-03 15:09:15	7.57	10.03		2.99155	-7.71662	-10.2243
2013-08-03 15:19:15	7.51	9.98		2.9985	-7.65545	-10.1733
2013-08-03 15:29:15	7.54	10.01		3.00544	-7.68603	-10.2039
2013-08-03 15:39:15	7.57	10.04		3.01238	-7.71662	-10.2345	2013-08-03 15:39:15
2013-08-03 15:49:15	7.56	10.02		3.01933	-7.70642	-10.2141
2013-08-03 15:59:15	7.58	10.05		3.02627	-7.72681	-10.2446
2013-08-03 16:09:15	7.59	10.07		3.03322	-7.737	-10.265
2013-08-03 16:19:15	7.61	10.08		3.04016	-7.75739	-10.2752
2013-08-03 16:29:15	7.62	10.08		3.04711	-7.76758	-10.2752
2013-08-03 16:39:15	7.61	10.08		3.05405	-7.75739	-10.2752	2013-08-03 16:39:15
2013-08-03 16:49:15	7.64	10.11		3.061	-7.78797	-10.3058
2013-08-03 16:59:15	7.66	10.13		3.06794	-7.80836	-10.3262
2013-08-03 17:09:15	7.66	10.13		3.07488	-7.80836	-10.3262
2013-08-03 17:19:15	7.69	10.16		3.08183	-7.83894	-10.3568
2013-08-03 17:29:15	7.7	10.16		3.08877	-7.84913	-10.3568
2013-08-03 17:39:15	7.7	10.19		3.09572	-7.84913	-10.3874	2013-08-03 17:39:15
2013-08-03 17:49:15	7.72	10.2		3.10266	-7.86952	-10.3976
2013-08-03 17:59:15	7.73	10.21		3.10961	-7.87971	-10.4077
2013-08-03 18:19:15	7.74	10.22		3.1235	-7.88991	-10.4179
2013-08-03 18:29:15	7.75	10.22		3.13044	-7.9001	-10.4179
2013-08-03 18:39:15	7.77	10.24		3.13738	-7.92049	-10.4383
2013-08-03 18:49:15	7.78	10.26		3.14433	-7.93068	-10.4587	2013-08-03 18:49:15
2013-08-03 18:59:15	7.79	10.26		3.15127	-7.94088	-10.4587
2013-08-03 19:09:15	7.8	10.27		3.15822	-7.95107	-10.4689
2013-08-03 19:19:15	7.8	10.26		3.16516	-7.95107	-10.4587
2013-08-03 19:29:15	7.82	10.29		3.17211	-7.97146	-10.4893
2013-08-03 19:39:15	7.82	10.29		3.17905	-7.97146	-10.4893
2013-08-03 19:49:15	7.84	10.29		3.186	-7.99185	-10.4893	2013-08-03 19:49:15
2013-08-03 19:59:15	7.84	10.32		3.19294	-7.99185	-10.5199
2013-08-03 20:09:15	7.84	10.31		3.19988	-7.99185	-10.5097
2013-08-03 20:19:15	7.86	10.31		3.20683	-8.01223	-10.5097
2013-08-03 20:29:15	7.87	10.34		3.21377	-8.02243	-10.5403
2013-08-03 20:39:15	7.89	10.35		3.22072	-8.04281	-10.5505
2013-08-03 20:49:15	7.89	10.36		3.22766	-8.04281	-10.5607	2013-08-03 20:49:15
2013-08-03 21:09:15	7.88	10.36		3.24155	-8.03262	-10.5607
2013-08-03 21:19:15	7.91	10.37		3.2485	-8.0632	-10.5708
2013-08-03 21:29:15	7.93	10.38		3.25544	-8.08359	-10.581
2013-08-03 21:39:15	7.96	10.42		3.26238	-8.11417	-10.6218
2013-08-03 21:49:15	7.97	10.43		3.26933	-8.12436	-10.632
2013-08-03 21:59:15	7.98	10.44		3.27627	-8.13456	-10.6422	2013-08-03 21:59:15
2013-08-03 22:09:15	7.98	10.45		3.28322	-8.13456	-10.6524
2013-08-03 22:19:15	8.01	10.46		3.29016	-8.16514	-10.6626
2013-08-03 22:29:15	8.01	10.48		3.29711	-8.16514	-10.683
2013-08-03 22:39:15	8.02	10.49		3.30405	-8.17533	-10.6932
2013-08-03 22:49:15	8.03	10.49		3.311	-8.18552	-10.6932
2013-08-03 22:59:15	8.04	10.51		3.31794	-8.19572	-10.7136	2013-08-03 22:59:15
2013-08-03 23:09:15	8.05	10.52		3.32488	-8.20591	-10.7238
2013-08-03 23:19:15	8.07	10.53		3.33183	-8.2263	-10.7339
2013-08-03 23:29:15	8.07	10.54		3.33877	-8.2263	-10.7441
2013-08-03 23:39:15	8.07	10.55		3.34572	-8.2263	-10.7543
2013-08-03 23:49:15	8.09	10.55		3.35266	-8.24669	-10.7543
2013-08-03 23:59:15	8.1	10.58		3.35961	-8.25688	-10.7849	2013-08-03 23:59:15
2013-08-04 00:09:15	8.1	10.58		3.36655	-8.25688	-10.7849
2013-08-04 00:19:15	8.12	10.6		3.3735	-8.27727	-10.8053
2013-08-04 00:29:15	8.12	10.6		3.38044	-8.27727	-10.8053
2013-08-04 00:39:15	8.14	10.62		3.38738	-8.29766	-10.8257
2013-08-04 00:49:15	8.14	10.62		3.39433	-8.29766	-10.8257
2013-08-04 00:59:15	8.16	10.64		3.40127	-8.31804	-10.8461	2013-08-04 00:59:15
2013-08-04 01:09:15	8.16	10.65		3.40822	-8.31804	-10.8563
2013-08-04 01:19:15	8.18	10.67		3.41516	-8.33843	-10.8767
2013-08-04 01:29:15	8.17	10.66		3.42211	-8.32824	-10.8665
2013-08-04 01:39:15	8.2	10.68		3.42905	-8.35882	-10.8869
2013-08-04 01:49:15	8.2	10.68		3.436	-8.35882	-10.8869
2013-08-04 01:59:15	8.21	10.69		3.44294	-8.36901	-10.897	2013-08-04 01:59:15
2013-08-04 02:09:15	8.22	10.7		3.44988	-8.3792	-10.9072
2013-08-04 02:19:15	8.23	10.71		3.45683	-8.3894	-10.9174
2013-08-04 02:29:15	8.24	10.72		3.46377	-8.39959	-10.9276
2013-08-04 02:39:15	8.25	10.73		3.47072	-8.40979	-10.9378
2013-08-04 02:49:15	8.25	10.74		3.47766	-8.40979	-10.948
2013-08-04 02:59:15	8.25	10.75		3.48461	-8.40979	-10.9582	2013-08-04 02:59:15
2013-08-04 03:09:15	8.28	10.76		3.49155	-8.44037	-10.9684
2013-08-04 03:19:15	8.28	10.77		3.4985	-8.44037	-10.9786
2013-08-04 03:29:15	8.3	10.79		3.50544	-8.46075	-10.999
2013-08-04 03:39:15	8.29	10.79		3.51238	-8.45056	-10.999
2013-08-04 03:49:15	8.31	10.81		3.51933	-8.47095	-11.0194
2013-08-04 03:59:15	8.32	10.81		3.52627	-8.48114	-11.0194	2013-08-04 03:59:15
2013-08-04 04:09:15	8.33	10.81		3.53322	-8.49134	-11.0194
2013-08-04 04:19:15	8.34	10.83		3.54016	-8.50153	-11.0398
2013-08-04 04:29:15	8.35	10.84		3.54711	-8.51172	-11.0499
2013-08-04 04:39:15	8.37	10.86		3.55405	-8.53211	-11.0703
2013-08-04 04:49:15	8.37	10.87		3.561	-8.53211	-11.0805
2013-08-04 04:59:15	8.39	10.89		3.56794	-8.5525	-11.1009	2013-08-04 04:59:15
2013-08-04 05:09:15	8.39	10.89		3.57488	-8.5525	-11.1009
2013-08-04 05:19:15	8.4	10.9		3.58183	-8.56269	-11.1111
2013-08-04 05:29:15	8.41	10.91		3.58877	-8.57288	-11.1213
2013-08-04 05:39:15	8.42	10.92		3.59572	-8.58308	-11.1315
2013-08-04 05:49:15	8.43	10.94		3.60266	-8.59327	-11.1519
2013-08-04 05:59:15	8.44	10.94		3.60961	-8.60347	-11.1519	2013-08-04 05:59:15
2013-08-04 06:09:15	8.45	10.95		3.61655	-8.61366	-11.1621
2013-08-04 06:19:15	8.46	10.96		3.6235	-8.62385	-11.1723
2013-08-04 06:29:15	8.47	10.97		3.63044	-8.63405	-11.1825
2013-08-04 06:39:15	8.48	10.98		3.63738	-8.64424	-11.1927
2013-08-04 06:49:15	8.49	10.99		3.64433	-8.65443	-11.2029
2013-08-04 06:59:15	8.5	11.01		3.65127	-8.66463	-11.2232	2013-08-04 06:59:15
2013-08-04 07:09:15	8.53	11.01		3.65822	-8.69521	-11.2232
2013-08-04 07:19:15	8.52	11.02		3.66516	-8.68502	-11.2334
2013-08-04 07:29:15	8.54	11.04		3.67211	-8.7054	-11.2538
2013-08-04 07:39:15	8.54	11.04		3.67905	-8.7054	-11.2538
2013-08-04 07:49:15	8.56	11.05		3.686	-8.72579	-11.264
2013-08-04 07:59:15	8.57	11.05		3.69294	-8.73598	-11.264	2013-08-04 07:59:15
2013-08-04 08:09:15	8.57	11.07		3.69988	-8.73598	-11.2844
2013-08-04 08:19:15	8.58	11.08		3.70683	-8.74618	-11.2946
2013-08-04 08:29:15	8.58	11.09		3.71377	-8.74618	-11.3048
2013-08-04 08:39:15	8.6	11.1		3.72072	-8.76656	-11.315
2013-08-04 08:49:15	8.61	11.11		3.72766	-8.77676	-11.3252
2013-08-04 08:59:15	8.62	11.13		3.73461	-8.78695	-11.3456	2013-08-04 08:59:15
2013-08-04 09:09:15	8.63	11.13		3.74155	-8.79715	-11.3456
2013-08-04 09:19:15	8.63	11.14		3.7485	-8.79715	-11.3558
2013-08-04 09:29:15	8.65	11.15		3.75544	-8.81753	-11.366
2013-08-04 09:39:15	8.66	11.16		3.76238	-8.82773	-11.3761
2013-08-04 09:49:15	8.67	11.18		3.76933	-8.83792	-11.3965
2013-08-04 09:59:15	8.67	11.17		3.77627	-8.83792	-11.3863	2013-08-04 09:59:15
2013-08-04 10:09:15	8.69	11.2		3.78322	-8.85831	-11.4169
2013-08-04 10:19:15	8.48	10.99		3.79016	-8.64424	-11.2029
2013-08-04 10:29:15	8.54	11.05		3.79711	-8.7054	-11.264
2013-08-04 10:39:15	8.6	11.1		3.80405	-8.76656	-11.315
2013-08-04 10:49:15	8.62	11.12		3.811	-8.78695	-11.3354
2013-08-04 10:59:15	8.68	11.19		3.81794	-8.84811	-11.4067	2013-08-04 10:59:15
2013-08-04 11:09:15	8.7	11.2		3.82488	-8.8685	-11.4169
2013-08-04 11:19:15	8.7	11.21		3.83183	-8.8685	-11.4271
2013-08-04 11:29:15	8.72	11.22		3.83877	-8.88889	-11.4373
2013-08-04 11:39:15	8.73	11.23		3.84572	-8.89908	-11.4475
2013-08-04 11:49:15	8.75	11.25		3.85266	-8.91947	-11.4679
2013-08-04 11:59:15	8.75	11.26		3.85961	-8.91947	-11.4781	2013-08-04 11:59:15
2013-08-04 12:09:15	8.77	11.25		3.86655	-8.93986	-11.4679
2013-08-04 12:19:15	8.77	11.28		3.8735	-8.93986	-11.4985
2013-08-04 12:29:15	8.77	11.28		3.88044	-8.93986	-11.4985
2013-08-04 12:39:15	8.79	11.31		3.88738	-8.96024	-11.5291
2013-08-04 12:49:15	8.8	11.31		3.89433	-8.97044	-11.5291
2013-08-04 12:59:15	8.81	11.33		3.90127	-8.98063	-11.5494	2013-08-04 12:59:15
2013-08-04 13:09:15	8.82	11.33		3.90822	-8.99083	-11.5494
2013-08-04 13:19:15	8.84	11.36		3.91516	-9.01121	-11.58
2013-08-04 13:29:15	8.84	11.36		3.92211	-9.01121	-11.58
2013-08-04 13:39:15	8.84	11.37		3.92905	-9.01121	-11.5902
2013-08-04 13:49:15	8.87	11.38		3.936	-9.04179	-11.6004
2013-08-04 13:59:15	8.88	11.39		3.94294	-9.05199	-11.6106	2013-08-04 13:59:15
2013-08-04 14:09:15	8.89	11.41		3.94988	-9.06218	-11.631
2013-08-04 14:19:15	8.9	11.41		3.95683	-9.07238	-11.631
2013-08-04 14:29:15	8.92	11.43		3.96377	-9.09276	-11.6514
2013-08-04 14:39:15	8.94	11.44		3.97072	-9.11315	-11.6616
2013-08-04 14:49:15	8.95	11.47		3.97766	-9.12334	-11.6922
2013-08-04 14:59:15	8.97	11.49		3.98461	-9.14373	-11.7125	2013-08-04 14:59:15
2013-08-04 15:09:15	8.96	11.48		3.99155	-9.13354	-11.7023
2013-08-04 15:19:15	9	11.52		3.9985	-9.17431	-11.7431
2013-08-04 15:29:15	9	11.53		4.00544	-9.17431	-11.7533
2013-08-04 15:39:15	9.01	11.53		4.01238	-9.18451	-11.7533
2013-08-04 15:49:15	9.03	11.54		4.01933	-9.20489	-11.7635
2013-08-04 15:59:15	9.04	11.57		4.02627	-9.21509	-11.7941	2013-08-04 15:59:15
2013-08-04 16:09:15	9.05	11.57		4.03322	-9.22528	-11.7941
2013-08-04 16:19:15	9.06	11.59		4.04016	-9.23547	-11.8145
2013-08-04 16:29:15	9.07	11.6		4.04711	-9.24567	-11.8247
2013-08-04 16:39:15	9.1	11.62		4.05405	-9.27625	-11.8451
2013-08-04 16:49:15	9.06	11.58		4.061	-9.23547	-11.8043
2013-08-04 16:59:15	9.07	11.59		4.06794	-9.24567	-11.8145	2013-08-04 16:59:15
2013-08-04 17:09:15	9.09	11.61		4.07488	-9.26606	-11.8349
2013-08-04 17:19:15	9.08	11.61		4.08183	-9.25586	-11.8349
2013-08-04 17:29:15	9.1	11.63		4.08877	-9.27625	-11.8552
2013-08-04 17:39:15	9.12	11.64		4.09572	-9.29664	-11.8654
2013-08-04 17:59:15	9.15	11.67		4.10961	-9.32722	-11.896
2013-08-04 18:09:15	9.15	11.68		4.11655	-9.32722	-11.9062	2013-08-04 18:09:15
2013-08-04 18:19:15	9.18	11.7		4.1235	-9.3578	-11.9266
2013-08-04 18:29:15	9.2	11.72		4.13044	-9.37819	-11.947
2013-08-04 18:39:15	9.2	11.72		4.13738	-9.37819	-11.947
2013-08-04 18:49:15	9.22	11.74		4.14433	-9.39857	-11.9674
2013-08-04 18:59:15	9.22	11.75		4.15127	-9.39857	-11.9776
2013-08-04 19:09:15	9.25	11.77		4.15822	-9.42915	-11.998	2013-08-04 19:09:15
2013-08-04 19:19:15	9.26	11.79		4.16516	-9.43935	-12.0183
2013-08-04 19:29:15	9.27	11.8		4.17211	-9.44954	-12.0285
2013-08-04 19:39:15	9.29	11.81		4.17905	-9.46993	-12.0387
2013-08-04 19:49:15	9.3	11.83		4.186	-9.48012	-12.0591
2013-08-04 19:59:15	9.33	11.84		4.19294	-9.5107	-12.0693
2013-08-04 20:09:15	9.33	11.86		4.19988	-9.5107	-12.0897	2013-08-04 20:09:15
2013-08-04 20:19:15	8.92	11.46		4.20683	-9.09276	-11.682
2013-08-04 20:29:15	9.01	11.54		4.21377	-9.18451	-11.7635
2013-08-04 20:49:15	9.06	11.6		4.22766	-9.23547	-11.8247
2013-08-04 20:59:15	9.12	11.65		4.23461	-9.29664	-11.8756
2013-08-04 21:09:15	9.17	11.72		4.24155	-9.3476	-11.947
2013-08-04 21:19:15	9.21	11.76		4.2485	-9.38838	-11.9878	2013-08-04 21:19:15
2013-08-04 21:29:15	9.25	11.8		4.25544	-9.42915	-12.0285
2013-08-04 21:39:15	9.29	11.84		4.26238	-9.46993	-12.0693
2013-08-04 21:49:15	9.3	11.85		4.26933	-9.48012	-12.0795
2013-08-04 21:59:15	9.34	11.87		4.27627	-9.5209	-12.0999
2013-08-04 22:09:15	9.35	11.86		4.28322	-9.53109	-12.0897
2013-08-04 22:19:15	9.34	11.9		4.29016	-9.5209	-12.1305	2013-08-04 22:19:15
2013-08-04 22:29:15	9.36	11.9		4.29711	-9.54128	-12.1305
2013-08-04 22:39:15	9.38	11.93		4.30405	-9.56167	-12.1611
2013-08-04 22:49:15	9.39	11.93		4.311	-9.57187	-12.1611
2013-08-04 22:59:15	9.4	11.95		4.31794	-9.58206	-12.1814
2013-08-04 23:09:15	9.42	11.96		4.32488	-9.60245	-12.1916
2013-08-04 23:19:15	9.43	11.97		4.33183	-9.61264	-12.2018	2013-08-04 23:19:15
2013-08-04 23:29:15	9.44	11.98		4.33877	-9.62283	-12.212
2013-08-04 23:39:15	9.46	12		4.34572	-9.64322	-12.2324
2013-08-04 23:49:15	9.45	12.01		4.35266	-9.63303	-12.2426
2013-08-04 23:59:15	9.48	12.03		4.35961	-9.66361	-12.263
2013-08-05 00:09:15	9.5	12.02		4.36655	-9.684	-12.2528
2013-08-05 00:19:15	9.51	12.06		4.3735	-9.69419	-12.2936	2013-08-05 00:19:15
2013-08-05 00:29:15	9.51	12.06		4.38044	-9.69419	-12.2936
2013-08-05 00:39:15	9.52	12.07		4.38738	-9.70438	-12.3038
2013-08-05 00:49:15	9.54	12.09		4.39433	-9.72477	-12.3242
2013-08-05 00:59:15	9.55	12.1		4.40127	-9.73496	-12.3344
2013-08-05 01:09:15	9.56	12.12		4.40822	-9.74516	-12.3547
2013-08-05 01:19:15	9.57	12.12		4.41516	-9.75535	-12.3547	2013-08-05 01:19:15
2013-08-05 01:29:15	9.59	12.14		4.42211	-9.77574	-12.3751
2013-08-05 01:39:15	9.6	12.16		4.42905	-9.78593	-12.3955
2013-08-05 01:49:15	9.6	12.15		4.436	-9.78593	-12.3853
2013-08-05 01:59:15	9.62	12.17		4.44294	-9.80632	-12.4057
2013-08-05 02:09:15	9.62	12.17		4.44988	-9.80632	-12.4057
2013-08-05 02:19:15	9.63	12.18		4.45683	-9.81651	-12.4159	2013-08-05 02:19:15
2013-08-05 02:29:15	9.64	12.2		4.46377	-9.82671	-12.4363
2013-08-05 02:39:15	9.65	12.21		4.47072	-9.8369	-12.4465
2013-08-05 02:49:15	9.67	12.22		4.47766	-9.85729	-12.4567
2013-08-05 02:59:15	9.68	12.24		4.48461	-9.86748	-12.4771
2013-08-05 03:09:15	9.69	12.24		4.49155	-9.87768	-12.4771
2013-08-05 03:19:15	9.7	12.26		4.4985	-9.88787	-12.4975	2013-08-05 03:19:15
2013-08-05 03:29:15	9.71	12.27		4.50544	-9.89806	-12.5076
2013-08-05 03:49:15	9.73	12.28		4.51933	-9.91845	-12.5178
2013-08-05 03:59:15	9.75	12.29		4.52627	-9.93884	-12.528
2013-08-05 04:09:15	9.77	12.32		4.53322	-9.95923	-12.5586
2013-08-05 04:19:15	9.78	12.32		4.54016	-9.96942	-12.5586
2013-08-05 04:29:15	9.78	12.34		4.54711	-9.96942	-12.579	2013-08-05 04:29:15
2013-08-05 04:39:15	9.8	12.35		4.55405	-9.98981	-12.5892
2013-08-05 04:59:15	9.83	12.38		4.56794	-10.0204	-12.6198
2013-08-05 05:09:15	9.82	12.38		4.57488	-10.0102	-12.6198
2013-08-05 05:19:15	9.84	12.37		4.58183	-10.0306	-12.6096
2013-08-05 05:29:15	9.84	12.4		4.58877	-10.0306	-12.6402
2013-08-05 05:49:15	9.89	12.43		4.60266	-10.0815	-12.6707	2013-08-05 05:49:15
2013-08-05 05:59:15	9.9	12.45		4.60961	-10.0917	-12.6911
2013-08-05 06:09:15	9.89	12.45		4.61655	-10.0815	-12.6911
2013-08-05 06:19:15	9.91	12.48		4.6235	-10.1019	-12.7217
2013-08-05 06:29:15	9.92	12.49		4.63044	-10.1121	-12.7319
2013-08-05 06:39:15	9.94	12.5		4.63738	-10.1325	-12.7421
2013-08-05 06:49:15	9.95	12.51		4.64433	-10.1427	-12.7523	2013-08-05 06:49:15
2013-08-05 06:59:15	9.96	12.52		4.65127	-10.1529	-12.7625
2013-08-05 07:09:15	9.97	12.53		4.65822	-10.1631	-12.7727
2013-08-05 07:19:15	10	12.56		4.66516	-10.1937	-12.8033
2013-08-05 07:29:15	10.02	12.57		4.67211	-10.2141	-12.8135
2013-08-05 07:39:15	10.01	12.57		4.67905	-10.2039	-12.8135
2013-08-05 07:49:15	10.03	12.59		4.686	-10.2243	-12.8338	2013-08-05 07:49:15
2013-08-05 07:59:15	10.04	12.61		4.69294	-10.2345	-12.8542
2013-08-05 08:09:15	10.06	12.61		4.69988	-10.2548	-12.8542
2013-08-05 08:19:15	10.07	12.61		4.70683	-10.265	-12.8542
2013-08-05 08:29:15	10.08	12.64		4.71377	-10.2752	-12.8848
2013-08-05 08:49:15	10.11	12.68		4.72766	-10.3058	-12.9256
2013-08-05 08:59:15	10.14	12.71		4.73461	-10.3364	-12.9562	2013-08-05 08:59:15
2013-08-05 09:09:15	10.16	12.72		4.74155	-10.3568	-12.9664
2013-08-05 09:19:15	10.19	12.74		4.7485	-10.3874	-12.9867
2013-08-05 09:29:15	10.19	12.76		4.75544	-10.3874	-13.0071
2013-08-05 09:39:15	10.2	12.77		4.76238	-10.3976	-13.0173
2013-08-05 09:49:15	10.22	12.79		4.76933	-10.4179	-13.0377
2013-08-05 09:59:15	10.23	12.8		4.77627	-10.4281	-13.0479	2013-08-05 09:59:15
2013-08-05 10:09:15	10.23	12.8		4.78322	-10.4281	-13.0479
2013-08-05 10:19:15	10.25	12.83		4.79016	-10.4485	-13.0785
2013-08-05 10:29:15	10.27	12.83		4.79711	-10.4689	-13.0785
2013-08-05 10:39:15	10.28	12.85		4.80405	-10.4791	-13.0989
2013-08-05 10:49:15	10.3	12.87		4.811	-10.4995	-13.1193
2013-08-05 10:59:15	10.31	12.89		4.81794	-10.5097	-13.1397	2013-08-05 10:59:15
2013-08-05 11:09:15	10.32	12.89		4.82488	-10.5199	-13.1397
2013-08-05 11:19:15	10.33	12.91		4.83183	-10.5301	-13.16
2013-08-05 11:29:15	10.35	12.92		4.83877	-10.5505	-13.1702
2013-08-05 11:39:15	10.36	12.93		4.84572	-10.5607	-13.1804
2013-08-05 11:49:15	10.37	12.95		4.85266	-10.5708	-13.2008
2013-08-05 11:59:15	10.38	12.95		4.85961	-10.581	-13.2008	2013-08-05 11:59:15
2013-08-05 12:09:15	10.4	12.97		4.86655	-10.6014	-13.2212
2013-08-05 12:19:15	10.41	12.98		4.8735	-10.6116	-13.2314
2013-08-05 12:39:15	10.44	13		4.88738	-10.6422	-13.2518
2013-08-05 12:49:15	10.46	13.03		4.89433	-10.6626	-13.2824
2013-08-05 12:59:15	10.45	13.03		4.90127	-10.6524	-13.2824
2013-08-05 13:09:15	10.47	13.04		4.90822	-10.6728	-13.2926	2013-08-05 13:09:15
2013-08-05 13:19:15	10.48	13.06		4.91516	-10.683	-13.3129
2013-08-05 13:29:15	10.43	13.01		4.92211	-10.632	-13.262
2013-08-05 13:39:15	10.5	13.07		4.92905	-10.7034	-13.3231
2013-08-05 13:49:15	10.52	13.09		4.936	-10.7238	-13.3435
2013-08-05 13:59:15	10.54	13.11		4.94294	-10.7441	-13.3639
2013-08-05 14:09:15	10.56	13.13		4.94988	-10.7645	-13.3843	2013-08-05 14:09:15
2013-08-05 14:19:15	10.57	13.15		4.95683	-10.7747	-13.4047
2013-08-05 14:29:15	10.58	13.16		4.96377	-10.7849	-13.4149
2013-08-05 14:39:15	10.6	13.17		4.97072	-10.8053	-13.4251
2013-08-05 14:49:15	10.62	13.19		4.97766	-10.8257	-13.4455
2013-08-05 14:59:15	10.64	13.2		4.98461	-10.8461	-13.4557
2013-08-05 15:09:15	10.65	13.23		4.99155	-10.8563	-13.4862	2013-08-05 15:09:15
2013-08-05 15:19:15	10.68	13.25		4.9985	-10.8869	-13.5066
2013-08-05 15:29:15	10.7	13.27		5.00544	-10.9072	-13.527
2013-08-05 15:39:15	10.7	13.28		5.01238	-10.9072	-13.5372
2013-08-05 15:49:15	10.73	13.29		5.01933	-10.9378	-13.5474
2013-08-05 15:59:15	10.75	13.32		5.02627	-10.9582	-13.578
2013-08-05 16:09:15	10.75	13.32		5.03322	-10.9582	-13.578	2013-08-05 16:09:15
2013-08-05 16:19:15	10.76	13.34		5.04016	-10.9684	-13.5984
2013-08-05 16:29:15	10.79	13.36		5.04711	-10.999	-13.6188
2013-08-05 16:39:15	10.8	13.38		5.05405	-11.0092	-13.6391
2013-08-05 16:49:15	10.82	13.39		5.061	-11.0296	-13.6493
2013-08-05 16:59:15	10.83	13.39		5.06794	-11.0398	-13.6493
2013-08-05 17:09:15	10.85	13.44		5.07488	-11.0601	-13.7003	2013-08-05 17:09:15
2013-08-05 17:19:15	10.87	13.45		5.08183	-11.0805	-13.7105
2013-08-05 17:29:15	10.88	13.45		5.08877	-11.0907	-13.7105
2013-08-05 17:39:15	10.91	13.47		5.09572	-11.1213	-13.7309
2013-08-05 17:49:15	10.92	13.5		5.10266	-11.1315	-13.7615
2013-08-05 17:59:15	10.95	13.52		5.10961	-11.1621	-13.7819
2013-08-05 18:09:15	10.95	13.54		5.11655	-11.1621	-13.8022	2013-08-05 18:09:15
2013-08-05 18:19:15	10.97	13.56		5.1235	-11.1825	-13.8226
2013-08-05 18:29:15	11	13.59		5.13044	-11.213	-13.8532
2013-08-05 18:49:15	11.03	13.6		5.14433	-11.2436	-13.8634
2013-08-05 18:59:15	11.05	13.62		5.15127	-11.264	-13.8838
2013-08-05 19:09:15	11.06	13.66		5.15822	-11.2742	-13.9246
2013-08-05 19:19:15	11.08	13.66		5.16516	-11.2946	-13.9246	2013-08-05 19:19:15
2013-08-05 19:29:15	11.1	13.69		5.17211	-11.315	-13.9551
2013-08-05 19:39:15	11.12	13.7		5.17905	-11.3354	-13.9653
2013-08-05 19:49:15	11.14	13.73		5.186	-11.3558	-13.9959
2013-08-05 19:59:15	11.14	13.74		5.19294	-11.3558	-14.0061
2013-08-05 20:09:15	11.16	13.75		5.19988	-11.3761	-14.0163
2013-08-05 20:19:15	11.18	13.77		5.20683	-11.3965	-14.0367	2013-08-05 20:19:15
2013-08-05 20:29:15	11.19	13.79		5.21377	-11.4067	-14.0571
2013-08-05 20:39:15	11.21	13.8		5.22072	-11.4271	-14.0673
2013-08-05 20:49:15	10.9	13.49		5.22766	-11.1111	-13.7513
2013-08-05 20:59:15	11.02	13.61		5.23461	-11.2334	-13.8736
2013-08-05 21:09:15	11.09	13.67		5.24155	-11.3048	-13.9348
2013-08-05 21:19:15	11.16	13.75		5.2485	-11.3761	-14.0163	2013-08-05 21:19:15
2013-08-05 21:29:15	11.2	13.79		5.25544	-11.4169	-14.0571
2013-08-05 21:39:15	11.22	13.81		5.26238	-11.4373	-14.0775
2013-08-05 21:49:15	11.23	13.82		5.26933	-11.4475	-14.0877
2013-08-05 21:59:15	11.26	13.85		5.27627	-11.4781	-14.1182
2013-08-05 22:09:15	11.26	13.85		5.28322	-11.4781	-14.1182
2013-08-05 22:19:15	11.28	13.86		5.29016	-11.4985	-14.1284	2013-08-05 22:19:15
2013-08-05 22:29:15	11.29	13.88		5.29711	-11.5087	-14.1488
2013-08-05 22:39:15	11.3	13.89		5.30405	-11.5189	-14.159
2013-08-05 22:49:15	11.31	13.89		5.311	-11.5291	-14.159
2013-08-05 22:59:15	11.34	13.92		5.31794	-11.5596	-14.1896
2013-08-05 23:09:15	11.35	13.92		5.32488	-11.5698	-14.1896
2013-08-05 23:19:15	11.37	13.94		5.33183	-11.5902	-14.21	2013-08-05 23:19:15
2013-08-05 23:29:15	11.37	13.95		5.33877	-11.5902	-14.2202
2013-08-05 23:39:15	11.39	13.97		5.34572	-11.6106	-14.2406
2013-08-05 23:49:15	11.41	14		5.35266	-11.631	-14.2712
2013-08-05 23:59:15	11.41	13.98		5.35961	-11.631	-14.2508
2013-08-06 00:09:15	11.42	14.01		5.36655	-11.6412	-14.2813
2013-08-06 00:19:15	11.43	14.02		5.3735	-11.6514	-14.2915	2013-08-06 00:19:15
2013-08-06 00:29:15	11.45	14.03		5.38044	-11.6718	-14.3017
2013-08-06 00:39:15	11.45	14.04		5.38738	-11.6718	-14.3119
2013-08-06 00:49:15	11.46	14.06		5.39433	-11.682	-14.3323
2013-08-06 00:59:15	11.48	14.08		5.40127	-11.7023	-14.3527
2013-08-06 01:09:15	11.49	14.08		5.40822	-11.7125	-14.3527
2013-08-06 01:19:15	11.51	14.1		5.41516	-11.7329	-14.3731	2013-08-06 01:19:15
2013-08-06 01:29:15	11.51	14.09		5.42211	-11.7329	-14.3629
2013-08-06 01:39:15	11.53	14.12		5.42905	-11.7533	-14.3935
2013-08-06 01:49:15	11.54	14.11		5.436	-11.7635	-14.3833
2013-08-06 01:59:15	11.55	14.15		5.44294	-11.7737	-14.4241
2013-08-06 02:09:15	11.56	14.14		5.44988	-11.7839	-14.4139
2013-08-06 02:19:15	11.56	14.16		5.45683	-11.7839	-14.4343	2013-08-06 02:19:15
2013-08-06 02:29:15	11.57	14.16		5.46377	-11.7941	-14.4343
2013-08-06 02:39:15	11.59	14.17		5.47072	-11.8145	-14.4444
2013-08-06 02:49:15	11.59	14.19		5.47766	-11.8145	-14.4648
2013-08-06 02:59:15	11.6	14.19		5.48461	-11.8247	-14.4648
2013-08-06 03:09:15	11.62	14.21		5.49155	-11.8451	-14.4852
2013-08-06 03:19:15	11.62	14.22		5.4985	-11.8451	-14.4954	2013-08-06 03:19:15
2013-08-06 03:29:15	11.63	14.23		5.50544	-11.8552	-14.5056
2013-08-06 03:39:15	11.64	14.23		5.51238	-11.8654	-14.5056
2013-08-06 03:49:15	11.66	14.23		5.51933	-11.8858	-14.5056
2013-08-06 03:59:15	11.67	14.26		5.52627	-11.896	-14.5362
2013-08-06 04:09:15	11.68	14.26		5.53322	-11.9062	-14.5362
2013-08-06 04:19:15	11.68	14.27		5.54016	-11.9062	-14.5464	2013-08-06 04:19:15
2013-08-06 04:29:15	11.69	14.28		5.54711	-11.9164	-14.5566
2013-08-06 04:39:15	11.7	14.3		5.55405	-11.9266	-14.577
2013-08-06 04:49:15	11.72	14.31		5.561	-11.947	-14.5872
2013-08-06 04:59:15	11.73	14.32		5.56794	-11.9572	-14.5973
2013-08-06 05:09:15	11.76	14.33		5.57488	-11.9878	-14.6075
2013-08-06 05:19:15	11.76	14.35		5.58183	-11.9878	-14.6279	2013-08-06 05:19:15
2013-08-06 05:29:15	11.77	14.35		5.58877	-11.998	-14.6279
2013-08-06 05:39:15	11.78	14.36		5.59572	-12.0082	-14.6381
2013-08-06 05:49:15	11.78	14.38		5.60266	-12.0082	-14.6585
2013-08-06 05:59:15	11.81	14.38		5.60961	-12.0387	-14.6585
2013-08-06 06:09:15	11.8	14.38		5.61655	-12.0285	-14.6585
2013-08-06 06:19:15	11.81	14.4		5.6235	-12.0387	-14.6789	2013-08-06 06:19:15
2013-08-06 06:29:15	11.81	14.4		5.63044	-12.0387	-14.6789
2013-08-06 06:39:15	11.84	14.43		5.63738	-12.0693	-14.7095
2013-08-06 06:49:15	11.84	14.43		5.64433	-12.0693	-14.7095
2013-08-06 06:59:15	11.85	14.43		5.65127	-12.0795	-14.7095
2013-08-06 07:09:15	11.87	14.44		5.65822	-12.0999	-14.7197
2013-08-06 07:19:15	11.69	14.31		5.66516	-11.9164	-14.5872	2013-08-06 07:19:15
2013-08-06 07:29:15	11.87	14.48		5.67211	-12.0999	-14.7604
2013-08-06 07:39:15	11.88	14.47		5.67905	-12.1101	-14.7503
2013-08-06 07:59:15	11.9	14.49		5.69294	-12.1305	-14.7706
2013-08-06 08:09:15	11.92	14.5		5.69988	-12.1509	-14.7808
2013-08-06 08:19:15	11.92	14.5		5.70683	-12.1509	-14.7808
2013-08-06 08:29:15	11.93	14.52		5.71377	-12.1611	-14.8012	2013-08-06 08:29:15
2013-08-06 08:39:15	11.93	14.52		5.72072	-12.1611	-14.8012
2013-08-06 08:49:15	11.95	14.54		5.72766	-12.1814	-14.8216
2013-08-06 08:59:15	11.96	14.56		5.73461	-12.1916	-14.842
2013-08-06 09:09:15	11.97	14.56		5.74155	-12.2018	-14.842
2013-08-06 09:19:15	11.99	14.58		5.7485	-12.2222	-14.8624
2013-08-06 09:29:15	11.99	14.58		5.75544	-12.2222	-14.8624	2013-08-06 09:29:15
2013-08-06 09:39:15	12	14.6		5.76238	-12.2324	-14.8828
2013-08-06 09:49:15	12.01	14.6		5.76933	-12.2426	-14.8828
2013-08-06 10:09:15	12.03	14.63		5.78322	-12.263	-14.9134
2013-08-06 10:19:15	12.04	14.64		5.79016	-12.2732	-14.9235
2013-08-06 10:29:15	12.05	14.67		5.79711	-12.2834	-14.9541
2013-08-06 10:39:15	12.05	14.65		5.80405	-12.2834	-14.9337	2013-08-06 10:39:15
2013-08-06 10:49:15	12.07	14.68		5.811	-12.3038	-14.9643
2013-08-06 10:59:15	12.08	14.68		5.81794	-12.314	-14.9643
2013-08-06 11:09:15	12.1	14.68		5.82488	-12.3344	-14.9643
2013-08-06 11:29:15	12.1	14.72		5.83877	-12.3344	-15.0051
2013-08-06 11:39:15	12.13	14.72		5.84572	-12.3649	-15.0051
2013-08-06 11:49:15	12.12	14.73		5.85266	-12.3547	-15.0153	2013-08-06 11:49:15
2013-08-06 11:59:15	12.15	14.75		5.85961	-12.3853	-15.0357
2013-08-06 12:09:15	12.17	14.78		5.86655	-12.4057	-15.0663
2013-08-06 12:19:15	12.18	14.79		5.8735	-12.4159	-15.0765
2013-08-06 12:29:15	12.22	14.8		5.88044	-12.4567	-15.0866
2013-08-06 12:39:15	12.21	14.82		5.88738	-12.4465	-15.107
2013-08-06 12:49:15	12.02	14.65		5.89433	-12.2528	-14.9337	2013-08-06 12:49:15
2013-08-06 12:59:15	12.02	14.63		5.90127	-12.2528	-14.9134
2013-08-06 13:09:15	12.1	14.71		5.90822	-12.3344	-14.9949
2013-08-06 13:19:15	12.17	14.76		5.91516	-12.4057	-15.0459
2013-08-06 13:29:15	12.19	14.81		5.92211	-12.4261	-15.0968
2013-08-06 13:39:15	12.22	14.84		5.92905	-12.4567	-15.1274
2013-08-06 13:49:15	12.25	14.85		5.936	-12.4873	-15.1376	2013-08-06 13:49:15
2013-08-06 13:59:15	12.27	14.9		5.94294	-12.5076	-15.1886
2013-08-06 14:09:15	12.28	14.89		5.94988	-12.5178	-15.1784
2013-08-06 14:19:15	12.3	14.91		5.95683	-12.5382	-15.1988
2013-08-06 14:29:15	12.33	14.94		5.96377	-12.5688	-15.2294
2013-08-06 14:39:15	12.35	14.97		5.97072	-12.5892	-15.2599
2013-08-06 14:49:15	12.36	14.99		5.97766	-12.5994	-15.2803	2013-08-06 14:49:15
2013-08-06 14:59:15	12.38	15		5.98461	-12.6198	-15.2905
2013-08-06 15:09:15	12.41	15.02		5.99155	-12.6504	-15.3109
2013-08-06 15:19:15	12.42	15.05		5.9985	-12.6606	-15.3415
2013-08-06 15:29:15	12.45	15.07		6.00544	-12.6911	-15.3619
2013-08-06 15:39:15	12.45	15.09		6.01238	-12.6911	-15.3823
2013-08-06 15:49:15	12.48	15.1		6.01933	-12.7217	-15.3925	2013-08-06 15:49:15
2013-08-06 15:59:15	12.5	15.12		6.02627	-12.7421	-15.4128
2013-08-06 16:09:15	12.52	15.15		6.03322	-12.7625	-15.4434
2013-08-06 16:19:15	12.52	15.16		6.04016	-12.7625	-15.4536
2013-08-06 16:29:15	12.55	15.19		6.04711	-12.7931	-15.4842
2013-08-06 16:39:15	12.58	15.21		6.05405	-12.8236	-15.5046
2013-08-06 16:49:15	12.61	15.24		6.061	-12.8542	-15.5352	2013-08-06 16:49:15
2013-08-06 16:59:15	12.62	15.26		6.06794	-12.8644	-15.5556
2013-08-06 17:09:15	12.65	15.27		6.07488	-12.895	-15.5657
2013-08-06 17:19:15	12.67	15.3		6.08183	-12.9154	-15.5963
2013-08-06 17:29:15	12.69	15.32		6.08877	-12.9358	-15.6167
2013-08-06 17:39:15	12.7	15.33		6.09572	-12.946	-15.6269
2013-08-06 17:49:15	12.73	15.35		6.10266	-12.9766	-15.6473	2013-08-06 17:49:15
2013-08-06 17:59:15	12.75	15.38		6.10961	-12.9969	-15.6779
2013-08-06 18:09:15	12.75	15.39		6.11655	-12.9969	-15.6881
2013-08-06 18:19:15	12.62	15.27		6.1235	-12.8644	-15.5657
2013-08-06 18:29:15	12.75	15.39		6.13044	-12.9969	-15.6881
2013-08-06 18:39:15	12.79	15.43		6.13738	-13.0377	-15.7288
2013-08-06 18:49:15	12.81	15.46		6.14433	-13.0581	-15.7594	2013-08-06 18:49:15
2013-08-06 18:59:15	12.84	15.46		6.15127	-13.0887	-15.7594
2013-08-06 19:09:15	12.85	15.5		6.15822	-13.0989	-15.8002
2013-08-06 19:19:15	12.87	15.52		6.16516	-13.1193	-15.8206
2013-08-06 19:29:15	12.9	15.54		6.17211	-13.1498	-15.841
2013-08-06 19:39:15	12.92	15.56		6.17905	-13.1702	-15.8614
2013-08-06 19:49:15	12.92	15.55		6.186	-13.1702	-15.8512	2013-08-06 19:49:15
2013-08-06 19:59:15	12.94	15.58		6.19294	-13.1906	-15.8818
2013-08-06 20:09:15	12.96	15.6		6.19988	-13.211	-15.9021
2013-08-06 20:19:15	12.97	15.62		6.20683	-13.2212	-15.9225
2013-08-06 20:29:15	12.99	15.61		6.21377	-13.2416	-15.9123
2013-08-06 20:39:15	13.01	15.65		6.22072	-13.262	-15.9531
2013-08-06 20:49:15	13.04	15.67		6.22766	-13.2926	-15.9735	2013-08-06 20:49:15
2013-08-06 20:59:15	13.06	15.7		6.23461	-13.3129	-16.0041
2013-08-06 21:09:15	13.06	15.69		6.24155	-13.3129	-15.9939
2013-08-06 21:19:15	13.08	15.72		6.2485	-13.3333	-16.0245
2013-08-06 21:29:15	13.09	15.74		6.25544	-13.3435	-16.0449
2013-08-06 21:39:15	13.11	15.74		6.26238	-13.3639	-16.0449
2013-08-06 21:49:15	13.13	15.75		6.26933	-13.3843	-16.055	2013-08-06 21:49:15
2013-08-06 21:59:15	13.13	15.76		6.27627	-13.3843	-16.0652
2013-08-06 22:09:15	13.15	15.79		6.28322	-13.4047	-16.0958
2013-08-06 22:19:15	13.17	15.8		6.29016	-13.4251	-16.106
2013-08-06 22:29:15	13.19	15.79		6.29711	-13.4455	-16.0958
2013-08-06 22:39:15	13.19	15.83		6.30405	-13.4455	-16.1366
2013-08-06 22:49:15	13.2	15.82		6.311	-13.4557	-16.1264	2013-08-06 22:49:15
2013-08-06 22:59:15	13.16	15.8		6.31794	-13.4149	-16.106
2013-08-06 23:09:15	13.16	15.79		6.32488	-13.4149	-16.0958
2013-08-06 23:19:15	13.18	15.82		6.33183	-13.4353	-16.1264
2013-08-06 23:29:15	13.21	15.83		6.33877	-13.4659	-16.1366
2013-08-06 23:39:15	13.2	15.83		6.34572	-13.4557	-16.1366
2013-08-06 23:49:15	13.22	15.86		6.35266	-13.476	-16.1672	2013-08-06 23:49:15
2013-08-06 23:59:15	13.22	15.84		6.35961	-13.476	-16.1468
2013-08-07 00:09:15	13.24	15.88		6.36655	-13.4964	-16.1876
2013-08-07 00:19:15	13.25	15.87		6.3735	-13.5066	-16.1774
2013-08-07 00:29:15	13.27	15.9		6.38044	-13.527	-16.208
2013-08-07 00:39:15	13.28	15.91		6.38738	-13.5372	-16.2181
2013-08-07 00:49:15	13.29	15.93		6.39433	-13.5474	-16.2385	2013-08-07 00:49:15
2013-08-07 00:59:15	13.31	15.93		6.40127	-13.5678	-16.2385
2013-08-07 01:09:15	13.31	15.94		6.40822	-13.5678	-16.2487
2013-08-07 01:19:15	13.32	15.95		6.41516	-13.578	-16.2589
2013-08-07 01:29:15	13.33	15.97		6.42211	-13.5882	-16.2793
2013-08-07 01:39:15	13.34	15.96		6.42905	-13.5984	-16.2691
2013-08-07 01:49:15	13.36	15.99		6.436	-13.6188	-16.2997	2013-08-07 01:49:15
2013-08-07 01:59:15	13.37	15.98		6.44294	-13.629	-16.2895
2013-08-07 02:09:15	13.37	16.01		6.44988	-13.629	-16.3201
2013-08-07 02:19:15	13.39	16.02		6.45683	-13.6493	-16.3303
2013-08-07 02:29:15	13.4	16.04		6.46377	-13.6595	-16.3507
2013-08-07 02:39:15	13.41	16.05		6.47072	-13.6697	-16.3609
2013-08-07 02:49:15	13.43	16.05		6.47766	-13.6901	-16.3609	2013-08-07 02:49:15
2013-08-07 02:59:15	13.44	16.07		6.48461	-13.7003	-16.3812
2013-08-07 03:09:15	13.45	16.07		6.49155	-13.7105	-16.3812
2013-08-07 03:19:15	13.47	16.1		6.4985	-13.7309	-16.4118
2013-08-07 03:29:15	13.49	16.11		6.50544	-13.7513	-16.422
2013-08-07 03:39:15	13.48	16.12		6.51238	-13.7411	-16.4322
2013-08-07 03:49:15	13.49	16.14		6.51933	-13.7513	-16.4526	2013-08-07 03:49:15
2013-08-07 03:59:15	13.51	16.14		6.52627	-13.7717	-16.4526
2013-08-07 04:09:15	13.53	16.16		6.53322	-13.792	-16.473
2013-08-07 04:19:15	13.53	16.16		6.54016	-13.792	-16.473
2013-08-07 04:29:15	13.54	16.17		6.54711	-13.8022	-16.4832
2013-08-07 04:39:15	13.56	16.2		6.55405	-13.8226	-16.5138
2013-08-07 04:49:15	13.56	16.2		6.561	-13.8226	-16.5138	2013-08-07 04:49:15
2013-08-07 04:59:15	13.58	16.23		6.56794	-13.843	-16.5443
2013-08-07 05:09:15	13.6	16.22		6.57488	-13.8634	-16.5341
2013-08-07 05:19:15	13.61	16.24		6.58183	-13.8736	-16.5545
2013-08-07 05:29:15	13.62	16.26		6.58877	-13.8838	-16.5749
2013-08-07 05:39:15	13.63	16.26		6.59572	-13.894	-16.5749
2013-08-07 05:49:15	13.64	16.27		6.60266	-13.9042	-16.5851	2013-08-07 05:49:15
2013-08-07 05:59:15	13.66	16.3		6.60961	-13.9246	-16.6157
2013-08-07 06:09:15	13.68	16.28		6.61655	-13.945	-16.5953
2013-08-07 06:19:15	13.68	16.31		6.6235	-13.945	-16.6259
2013-08-07 06:29:15	13.7	16.33		6.63044	-13.9653	-16.6463
2013-08-07 06:39:15	13.71	16.34		6.63738	-13.9755	-16.6565
2013-08-07 06:49:15	13.71	16.36		6.64433	-13.9755	-16.6769	2013-08-07 06:49:15
2013-08-07 06:59:15	13.73	16.35		6.65127	-13.9959	-16.6667
2013-08-07 07:09:15	13.74	16.37		6.65822	-14.0061	-16.6871
2013-08-07 07:19:15	13.76	16.41		6.66516	-14.0265	-16.7278
2013-08-07 07:29:15	13.77	16.39		6.67211	-14.0367	-16.7074
2013-08-07 07:39:15	13.77	16.42		6.67905	-14.0367	-16.738
2013-08-07 07:49:15	13.79	16.43		6.686	-14.0571	-16.7482	2013-08-07 07:49:15
2013-08-07 07:59:15	13.81	16.44		6.69294	-14.0775	-16.7584
2013-08-07 08:09:15	13.81	16.45		6.69988	-14.0775	-16.7686
2013-08-07 08:19:15	13.6	16.23		6.70683	-13.8634	-16.5443
2013-08-07 08:29:15	13.67	16.3		6.71377	-13.9348	-16.6157
2013-08-07 08:39:15	13.77	16.39		6.72072	-14.0367	-16.7074
2013-08-07 08:49:15	13.81	16.44		6.72766	-14.0775	-16.7584	2013-08-07 08:49:15
2013-08-07 08:59:15	13.87	16.49		6.73461	-14.1386	-16.8094
2013-08-07 09:09:15	13.89	16.52		6.74155	-14.159	-16.84
2013-08-07 09:19:15	13.9	16.52		6.7485	-14.1692	-16.84
2013-08-07 09:29:15	13.91	16.56		6.75544	-14.1794	-16.8807
2013-08-07 09:39:15	13.93	16.56		6.76238	-14.1998	-16.8807
2013-08-07 09:49:15	13.94	16.57		6.76933	-14.21	-16.8909	2013-08-07 09:49:15
2013-08-07 09:59:15	13.97	16.6		6.77627	-14.2406	-16.9215
2013-08-07 10:09:15	13.98	16.61		6.78322	-14.2508	-16.9317
2013-08-07 10:19:15	14.01	16.62		6.79016	-14.2813	-16.9419
2013-08-07 10:29:15	14	16.64		6.79711	-14.2712	-16.9623
2013-08-07 10:39:15	14.02	16.67		6.80405	-14.2915	-16.9929
2013-08-07 10:49:15	14.03	16.65		6.811	-14.3017	-16.9725	2013-08-07 10:49:15
2013-08-07 10:59:15	14.05	16.69		6.81794	-14.3221	-17.0133
2013-08-07 11:09:15	14.07	16.7		6.82488	-14.3425	-17.0234
2013-08-07 11:19:15	14.09	16.72		6.83183	-14.3629	-17.0438
2013-08-07 11:29:15	14.11	16.74		6.83877	-14.3833	-17.0642
2013-08-07 11:39:15	14.12	16.75		6.84572	-14.3935	-17.0744
2013-08-07 11:49:15	14.13	16.77		6.85266	-14.4037	-17.0948	2013-08-07 11:49:15
2013-08-07 11:59:15	14.14	16.77		6.85961	-14.4139	-17.0948
2013-08-07 12:09:15	14.15	16.78		6.86655	-14.4241	-17.105
2013-08-07 12:19:15	14.18	16.81		6.8735	-14.4546	-17.1356
2013-08-07 12:29:15	14.19	16.81		6.88044	-14.4648	-17.1356
2013-08-07 12:39:15	14.2	16.84		6.88738	-14.475	-17.1662
2013-08-07 12:49:15	14.21	16.84		6.89433	-14.4852	-17.1662	2013-08-07 12:49:15
2013-08-07 12:59:15	14.24	16.88		6.90127	-14.5158	-17.2069
2013-08-07 13:09:15	14.23	16.9		6.90822	-14.5056	-17.2273
2013-08-07 13:19:15	14.2	16.82		6.91516	-14.475	-17.1458
2013-08-07 13:29:15	14.24	16.87		6.92211	-14.5158	-17.1967
2013-08-07 13:39:15	14.27	16.91		6.92905	-14.5464	-17.2375
2013-08-07 13:49:15	14.28	16.91		6.936	-14.5566	-17.2375	2013-08-07 13:49:15
2013-08-07 13:59:15	14.29	16.94		6.94294	-14.5668	-17.2681
2013-08-07 14:09:15	14.31	16.93		6.94988	-14.5872	-17.2579
2013-08-07 14:19:15	14.32	16.97		6.95683	-14.5973	-17.2987
2013-08-07 14:29:15	14.35	16.97		6.96377	-14.6279	-17.2987
2013-08-07 14:39:15	14.35	16.99		6.97072	-14.6279	-17.3191
2013-08-07 14:49:15	14.37	16.99		6.97766	-14.6483	-17.3191	2013-08-07 14:49:15
2013-08-07 14:59:15	14.38	17.02		6.98461	-14.6585	-17.3496
2013-08-07 15:09:15	14.39	17.02		6.99155	-14.6687	-17.3496
2013-08-07 15:19:15	14.41	17.05		6.9985	-14.6891	-17.3802
2013-08-07 15:29:15	14.37	16.99		7.00544	-14.6483	-17.3191
2013-08-07 15:39:15	14.39	17.03		7.01238	-14.6687	-17.3598
2013-08-07 15:49:15	14.39	17.01		7.01933	-14.6687	-17.3394	2013-08-07 15:49:15
2013-08-07 15:59:15	14.41	17.05		7.02627	-14.6891	-17.3802
2013-08-07 16:09:15	14.43	17.06		7.03322	-14.7095	-17.3904
2013-08-07 16:19:15	14.44	17.1		7.04016	-14.7197	-17.4312
2013-08-07 16:29:15	14.44	17.08		7.04711	-14.7197	-17.4108
2013-08-07 16:39:15	14.46	17.09		7.05405	-14.7401	-17.421
2013-08-07 16:49:15	14.47	17.1		7.061	-14.7503	-17.4312	2013-08-07 16:49:15
2013-08-07 16:59:15	14.49	17.12		7.06794	-14.7706	-17.4516
2013-08-07 17:09:15	14.5	17.14		7.07488	-14.7808	-17.472
2013-08-07 17:19:15	14.5	17.13		7.08183	-14.7808	-17.4618
2013-08-07 17:29:15	14.53	17.17		7.08877	-14.8114	-17.5025
2013-08-07 17:39:15	14.53	17.17		7.09572	-14.8114	-17.5025
2013-08-07 17:49:15	14.55	17.19		7.10266	-14.8318	-17.5229	2013-08-07 17:49:15
2013-08-07 17:59:15	14.56	17.19		7.10961	-14.842	-17.5229
2013-08-07 18:09:15	14.57	17.22		7.11655	-14.8522	-17.5535
2013-08-07 18:19:15	14.59	17.22		7.1235	-14.8726	-17.5535
2013-08-07 18:29:15	14.6	17.23		7.13044	-14.8828	-17.5637
2013-08-07 18:39:15	14.61	17.24		7.13738	-14.893	-17.5739
2013-08-07 18:49:15	14.63	17.25		7.14433	-14.9134	-17.5841	2013-08-07 18:49:15
2013-08-07 18:59:15	14.64	17.28		7.15127	-14.9235	-17.6147
2013-08-07 19:09:15	14.65	17.29		7.15822	-14.9337	-17.6249
2013-08-07 19:19:15	14.68	17.31		7.16516	-14.9643	-17.6453
2013-08-07 19:29:15	14.67	17.31		7.17211	-14.9541	-17.6453
2013-08-07 19:39:15	14.75	17.39		7.17905	-15.0357	-17.7268
2013-08-07 19:49:15	14.74	17.37		7.186	-15.0255	-17.7064	2013-08-07 19:49:15
2013-08-07 19:59:15	14.76	17.39		7.19294	-15.0459	-17.7268
2013-08-07 20:09:15	14.78	17.4		7.19988	-15.0663	-17.737
2013-08-07 20:19:15	14.78	17.41		7.20683	-15.0663	-17.7472
2013-08-07 20:29:15	14.8	17.42		7.21377	-15.0866	-17.7574
2013-08-07 20:39:15	14.81	17.45		7.22072	-15.0968	-17.788
2013-08-07 20:49:15	14.82	17.44		7.22766	-15.107	-17.7778	2013-08-07 20:49:15
2013-08-07 20:59:15	14.83	17.45		7.23461	-15.1172	-17.788
2013-08-07 21:09:15	14.85	17.48		7.24155	-15.1376	-17.8186
2013-08-07 21:19:15	14.86	17.49		7.2485	-15.1478	-17.8287
2013-08-07 21:29:15	14.88	17.52		7.25544	-15.1682	-17.8593
2013-08-07 21:39:15	14.88	17.51		7.26238	-15.1682	-17.8491
2013-08-07 21:49:15	14.9	17.52		7.26933	-15.1886	-17.8593	2013-08-07 21:49:15
2013-08-07 21:59:15	14.93	17.55		7.27627	-15.2192	-17.8899
2013-08-07 22:09:15	14.92	17.55		7.28322	-15.209	-17.8899
2013-08-07 22:19:15	14.93	17.56		7.29016	-15.2192	-17.9001
2013-08-07 22:29:15	14.97	17.6		7.29711	-15.2599	-17.9409
2013-08-07 22:39:15	14.97	17.6		7.30405	-15.2599	-17.9409
2013-08-07 22:49:15	14.99	17.62		7.311	-15.2803	-17.9613	2013-08-07 22:49:15
2013-08-07 22:59:15	15	17.63		7.31794	-15.2905	-17.9715
2013-08-07 23:09:15	15.01	17.64		7.32488	-15.3007	-17.9817
2013-08-07 23:19:15	15.02	17.67		7.33183	-15.3109	-18.0122
2013-08-07 23:29:15	14.97	17.61		7.33877	-15.2599	-17.9511
2013-08-07 23:39:15	14.99	17.62		7.34572	-15.2803	-17.9613
2013-08-07 23:49:15	15	17.65		7.35266	-15.2905	-17.9918	2013-08-07 23:49:15
2013-08-07 23:59:15	15.02	17.66		7.35961	-15.3109	-18.002
2013-08-08 00:09:15	15.04	17.66		7.36655	-15.3313	-18.002
2013-08-08 00:19:15	15.04	17.69		7.3735	-15.3313	-18.0326
2013-08-08 00:29:15	15.05	17.69		7.38044	-15.3415	-18.0326
2013-08-08 00:39:15	15.06	17.71		7.38738	-15.3517	-18.053
2013-08-08 00:49:15	15.08	17.74		7.39433	-15.3721	-18.0836	2013-08-08 00:49:15
2013-08-08 00:59:15	15.1	17.73		7.40127	-15.3925	-18.0734
2013-08-08 01:09:15	15.11	17.75		7.40822	-15.4027	-18.0938
2013-08-08 01:19:15	15.15	17.77		7.41516	-15.4434	-18.1142
2013-08-08 01:29:15	15.15	17.78		7.42211	-15.4434	-18.1244
2013-08-08 01:39:15	15.16	17.8		7.42905	-15.4536	-18.1448
2013-08-08 01:49:15	15.18	17.81		7.436	-15.474	-18.1549	2013-08-08 01:49:15
2013-08-08 01:59:15	15.19	17.82		7.44294	-15.4842	-18.1651
2013-08-08 02:09:15	15.2	17.84		7.44988	-15.4944	-18.1855
2013-08-08 02:19:15	15.21	17.84		7.45683	-15.5046	-18.1855
2013-08-08 02:29:15	15.22	17.85		7.46377	-15.5148	-18.1957
2013-08-08 02:39:15	15.24	17.86		7.47072	-15.5352	-18.2059
2013-08-08 02:49:15	15.26	17.87		7.47766	-15.5556	-18.2161	2013-08-08 02:49:15
2013-08-08 02:59:15	15.26	17.89		7.48461	-15.5556	-18.2365
2013-08-08 03:09:15	15.28	17.91		7.49155	-15.5759	-18.2569
2013-08-08 03:19:15	15.27	17.9		7.4985	-15.5657	-18.2467
2013-08-08 03:29:15	15.28	17.92		7.50544	-15.5759	-18.2671
2013-08-08 03:39:15	15.3	17.95		7.51238	-15.5963	-18.2977
2013-08-08 03:49:15	15.31	17.95		7.51933	-15.6065	-18.2977	2013-08-08 03:49:15
2013-08-08 03:59:15	15.32	17.95		7.52627	-15.6167	-18.2977
2013-08-08 04:09:15	15.33	17.98		7.53322	-15.6269	-18.3282
2013-08-08 04:19:15	15.35	17.97		7.54016	-15.6473	-18.318
2013-08-08 04:29:15	15.35	17.98		7.54711	-15.6473	-18.3282
2013-08-08 04:39:15	15.38	18.01		7.55405	-15.6779	-18.3588
2013-08-08 04:49:15	15.39	18.02		7.561	-15.6881	-18.369	2013-08-08 04:49:15
2013-08-08 04:59:15	15.4	18.01		7.56794	-15.6983	-18.3588
2013-08-08 05:09:15	15.4	18.05		7.57488	-15.6983	-18.3996
2013-08-08 05:19:15	15.44	18.06		7.58183	-15.739	-18.4098
2013-08-08 05:29:15	15.44	18.08		7.58877	-15.739	-18.4302
2013-08-08 05:39:15	15.45	18.09		7.59572	-15.7492	-18.4404
2013-08-08 05:49:15	15.47	18.12		7.60266	-15.7696	-18.4709	2013-08-08 05:49:15
2013-08-08 05:59:15	15.48	18.11		7.60961	-15.7798	-18.4608
2013-08-08 06:09:15	15.49	18.13		7.61655	-15.79	-18.4811
2013-08-08 06:19:15	15.5	18.15		7.6235	-15.8002	-18.5015
2013-08-08 06:29:15	15.51	18.14		7.63044	-15.8104	-18.4913
2013-08-08 06:39:15	15.53	18.15		7.63738	-15.8308	-18.5015
2013-08-08 06:49:15	15.55	18.18		7.64433	-15.8512	-18.5321	2013-08-08 06:49:15
2013-08-08 06:59:15	15.56	18.19		7.65127	-15.8614	-18.5423
2013-08-08 07:09:15	15.57	18.21		7.65822	-15.8716	-18.5627
2013-08-08 07:19:15	15.58	18.22		7.66516	-15.8818	-18.5729
2013-08-08 07:29:15	15.6	18.25		7.67211	-15.9021	-18.6035
2013-08-08 07:39:15	15.61	18.24		7.67905	-15.9123	-18.5933
2013-08-08 07:49:15	15.63	18.26		7.686	-15.9327	-18.6137	2013-08-08 07:49:15
2013-08-08 07:59:15	15.65	18.28		7.69294	-15.9531	-18.634
2013-08-08 08:09:15	15.67	18.29		7.69988	-15.9735	-18.6442
2013-08-08 08:19:15	15.66	18.3		7.70683	-15.9633	-18.6544
2013-08-08 08:29:15	15.66	18.33		7.71377	-15.9633	-18.685
2013-08-08 08:39:15	15.73	18.39		7.72072	-16.0347	-18.7462
2013-08-08 08:49:15	15.75	18.39		7.72766	-16.055	-18.7462	2013-08-08 08:49:15
2013-08-08 08:59:15	15.78	18.42		7.73461	-16.0856	-18.7768
2013-08-08 09:09:15	15.77	18.44		7.74155	-16.0754	-18.7971
2013-08-08 09:19:15	15.79	18.44		7.7485	-16.0958	-18.7971
2013-08-08 09:29:15	15.8	18.48		7.75544	-16.106	-18.8379
2013-08-08 09:39:15	15.82	18.47		7.76238	-16.1264	-18.8277
2013-08-08 09:49:15	15.84	18.47		7.76933	-16.1468	-18.8277	2013-08-08 09:49:15
2013-08-08 09:59:15	15.85	18.51		7.77627	-16.157	-18.8685
2013-08-08 10:09:15	15.87	18.54		7.78322	-16.1774	-18.8991
2013-08-08 10:19:15	15.89	18.54		7.79016	-16.1978	-18.8991
2013-08-08 10:29:15	15.9	18.56		7.79711	-16.208	-18.9195
2013-08-08 10:39:15	15.91	18.57		7.80405	-16.2181	-18.9297
2013-08-08 10:49:15	15.91	18.6		7.811	-16.2181	-18.9602	2013-08-08 10:49:15
2013-08-08 10:59:15	15.93	18.59		7.81794	-16.2385	-18.9501
2013-08-08 11:09:15	15.96	18.63		7.82488	-16.2691	-18.9908
2013-08-08 11:19:15	15.98	18.62		7.83183	-16.2895	-18.9806
2013-08-08 11:29:15	15.98	18.65		7.83877	-16.2895	-19.0112
2013-08-08 11:39:15	15.94	18.6		7.84572	-16.2487	-18.9602
2013-08-08 11:49:15	15.98	18.65		7.85266	-16.2895	-19.0112	2013-08-08 11:49:15
2013-08-08 11:59:15	15.99	18.64		7.85961	-16.2997	-19.001
2013-08-08 12:09:15	16	18.67		7.86655	-16.3099	-19.0316
2013-08-08 12:19:15	16.03	18.68		7.8735	-16.3405	-19.0418
2013-08-08 12:29:15	16.03	18.71		7.88044	-16.3405	-19.0724
2013-08-08 12:39:15	16.06	18.72		7.88738	-16.371	-19.0826
2013-08-08 12:49:15	16.07	18.75		7.89433	-16.3812	-19.1131	2013-08-08 12:49:15
2013-08-08 12:59:15	16.1	18.77		7.90127	-16.4118	-19.1335
2013-08-08 13:09:15	16.11	18.76		7.90822	-16.422	-19.1233
2013-08-08 13:19:15	16.13	18.8		7.91516	-16.4424	-19.1641
2013-08-08 13:29:15	16.14	18.8		7.92211	-16.4526	-19.1641
2013-08-08 13:39:15	16.14	18.81		7.92905	-16.4526	-19.1743
2013-08-08 13:49:15	16.17	18.85		7.936	-16.4832	-19.2151	2013-08-08 13:49:15
2013-08-08 13:59:15	16.19	18.86		7.94294	-16.5036	-19.2253
2013-08-08 14:09:15	16.21	18.87		7.94988	-16.524	-19.2355
2013-08-08 14:19:15	16.22	18.9		7.95683	-16.5341	-19.2661
2013-08-08 14:29:15	16.25	18.9		7.96377	-16.5647	-19.2661
2013-08-08 14:39:15	16.25	18.93		7.97072	-16.5647	-19.2966
2013-08-08 14:49:15	16.27	18.94		7.97766	-16.5851	-19.3068	2013-08-08 14:49:15
2013-08-08 14:59:15	16.3	18.96		7.98461	-16.6157	-19.3272
2013-08-08 15:09:15	16.33	18.98		7.99155	-16.6463	-19.3476
2013-08-08 15:19:15	16.32	18.99		7.9985	-16.6361	-19.3578
2013-08-08 15:29:15	16.34	19		8.00544	-16.6565	-19.368
2013-08-08 15:39:15	16.37	19.04		8.01238	-16.6871	-19.4088
2013-08-08 15:49:15	16.37	19.04		8.01933	-16.6871	-19.4088	2013-08-08 15:49:15
2013-08-08 15:59:15	16.4	19.04		8.02627	-16.7176	-19.4088
2013-08-08 16:09:15	16.41	19.1		8.03322	-16.7278	-19.4699
2013-08-08 16:19:15	16.42	19.1		8.04016	-16.738	-19.4699
2013-08-08 16:29:15	16.45	19.1		8.04711	-16.7686	-19.4699
2013-08-08 16:39:15	16.45	19.12		8.05405	-16.7686	-19.4903
2013-08-08 16:49:15	16.48	19.16		8.061	-16.7992	-19.5311	2013-08-08 16:49:15
2013-08-08 16:59:15	16.51	19.16		8.06794	-16.8298	-19.5311
2013-08-08 17:09:15	16.52	19.17		8.07488	-16.84	-19.5413
2013-08-08 17:19:15	16.53	19.2		8.08183	-16.8502	-19.5719
2013-08-08 17:29:15	16.57	19.25		8.08877	-16.8909	-19.6228
2013-08-08 17:39:15	16.58	19.24		8.09572	-16.9011	-19.6126
2013-08-08 17:49:15	16.59	19.26		8.10266	-16.9113	-19.633	2013-08-08 17:49:15
2013-08-08 17:59:15	16.61	19.28		8.10961	-16.9317	-19.6534
2013-08-08 18:09:15	16.63	19.29		8.11655	-16.9521	-19.6636
2013-08-08 18:19:15	16.64	19.31		8.1235	-16.9623	-19.684
2013-08-08 18:29:15	16.67	19.36		8.13044	-16.9929	-19.735
2013-08-08 18:39:15	16.69	19.37		8.13738	-17.0133	-19.7452
2013-08-08 18:49:15	16.71	19.38		8.14433	-17.0336	-19.7554	2013-08-08 18:49:15
2013-08-08 18:59:15	16.74	19.41		8.15127	-17.0642	-19.7859
2013-08-08 19:09:15	16.75	19.41		8.15822	-17.0744	-19.7859
2013-08-08 19:19:15	16.77	19.46		8.16516	-17.0948	-19.8369
2013-08-08 19:29:15	16.78	19.46		8.17211	-17.105	-19.8369
2013-08-08 19:39:15	16.8	19.48		8.17905	-17.1254	-19.8573
2013-08-08 19:49:15	16.83	19.52		8.186	-17.156	-19.8981	2013-08-08 19:49:15
2013-08-08 19:59:15	16.88	19.55		8.19294	-17.2069	-19.9286
2013-08-08 20:09:15	16.91	19.58		8.19988	-17.2375	-19.9592
2013-08-08 20:19:15	16.92	19.6		8.20683	-17.2477	-19.9796
2013-08-08 20:29:15	16.95	19.65		8.21377	-17.2783	-20.0306
2013-08-08 20:39:15	16.97	19.66		8.22072	-17.2987	-20.0408
2013-08-08 20:49:15	16.99	19.67		8.22766	-17.3191	-20.051	2013-08-08 20:49:15
2013-08-08 20:59:15	17.02	19.7		8.23461	-17.3496	-20.0815
2013-08-08 21:09:15	17.05	19.74		8.24155	-17.3802	-20.1223
2013-08-08 21:19:15	17.05	19.74		8.2485	-17.3802	-20.1223
2013-08-08 21:29:15	17.07	19.75		8.25544	-17.4006	-20.1325
2013-08-08 21:39:15	17.1	19.78		8.26238	-17.4312	-20.1631
2013-08-08 21:49:15	17.13	19.83		8.26933	-17.4618	-20.2141	2013-08-08 21:49:15
2013-08-08 21:59:15	17.13	19.83		8.27627	-17.4618	-20.2141
2013-08-08 22:09:15	17.17	19.85		8.28322	-17.5025	-20.2345
2013-08-08 22:19:15	17.2	19.86		8.29016	-17.5331	-20.2446
2013-08-08 22:29:15	17.22	19.88		8.29711	-17.5535	-20.265
2013-08-08 22:39:15	17.24	19.93		8.30405	-17.5739	-20.316
2013-08-08 22:49:15	17.26	19.94		8.311	-17.5943	-20.3262	2013-08-08 22:49:15
2013-08-08 22:59:15	17.28	19.97		8.31794	-17.6147	-20.3568
2013-08-08 23:09:15	17.29	19.99		8.32488	-17.6249	-20.3772
2013-08-08 23:19:15	17.33	19.98		8.33183	-17.6656	-20.367
2013-08-08 23:29:15	17.35	20.03		8.33877	-17.686	-20.4179
2013-08-08 23:39:15	17.36	20.06		8.34572	-17.6962	-20.4485
2013-08-08 23:49:15	17.39	20.06		8.35266	-17.7268	-20.4485	2013-08-08 23:49:15
2013-08-08 23:59:15	17.42	20.08		8.35961	-17.7574	-20.4689
2013-08-09 00:09:15	17.42	20.1		8.36655	-17.7574	-20.4893
2013-08-09 00:19:15	17.45	20.13		8.3735	-17.788	-20.5199
2013-08-09 00:29:15	17.47	20.15		8.38044	-17.8084	-20.5403
2013-08-09 00:39:15	17.5	20.18		8.38738	-17.8389	-20.5708
2013-08-09 00:49:15	17.51	20.2		8.39433	-17.8491	-20.5912	2013-08-09 00:49:15
2013-08-09 00:59:15	17.54	20.23		8.40127	-17.8797	-20.6218
2013-08-09 01:09:15	17.56	20.25		8.40822	-17.9001	-20.6422
2013-08-09 01:19:15	17.54	20.21		8.41516	-17.8797	-20.6014
2013-08-09 01:29:15	17.55	20.25		8.42211	-17.8899	-20.6422
2013-08-09 01:39:15	17.59	20.25		8.42905	-17.9307	-20.6422
2013-08-09 01:49:15	17.61	20.3		8.436	-17.9511	-20.6932	2013-08-09 01:49:15
2013-08-09 01:59:15	17.63	20.33		8.44294	-17.9715	-20.7238
2013-08-09 02:09:15	17.65	20.34		8.44988	-17.9918	-20.7339
2013-08-09 02:19:15	17.69	20.36		8.45683	-18.0326	-20.7543
2013-08-09 02:29:15	17.72	20.4		8.46377	-18.0632	-20.7951
2013-08-09 02:39:15	17.73	20.44		8.47072	-18.0734	-20.8359
2013-08-09 02:49:15	17.75	20.46		8.47766	-18.0938	-20.8563	2013-08-09 02:49:15
2013-08-09 02:59:15	17.79	20.48		8.48461	-18.1346	-20.8767
2013-08-09 03:09:15	17.81	20.51		8.49155	-18.1549	-20.9072
2013-08-09 03:19:15	17.85	20.53		8.4985	-18.1957	-20.9276
2013-08-09 03:29:15	17.87	20.56		8.50544	-18.2161	-20.9582
2013-08-09 03:39:15	17.91	20.59		8.51238	-18.2569	-20.9888
2013-08-09 03:49:15	17.93	20.62		8.51933	-18.2773	-21.0194	2013-08-09 03:49:15
2013-08-09 03:59:15	17.95	20.64		8.52627	-18.2977	-21.0398
2013-08-09 04:09:15	17.99	20.66		8.53322	-18.3384	-21.0601
2013-08-09 04:19:15	18	20.7		8.54016	-18.3486	-21.1009
2013-08-09 04:29:15	18.04	20.74		8.54711	-18.3894	-21.1417
2013-08-09 04:49:15	18.09	20.78		8.561	-18.4404	-21.1825
2013-08-09 04:59:15	18.11	20.82		8.56794	-18.4608	-21.2232	2013-08-09 04:59:15
2013-08-09 05:09:15	18.15	20.86		8.57488	-18.5015	-21.264
2013-08-09 05:19:15	18.18	20.87		8.58183	-18.5321	-21.2742
2013-08-09 05:29:15	18.21	20.92		8.58877	-18.5627	-21.3252
2013-08-09 05:39:15	18.24	20.93		8.59572	-18.5933	-21.3354
2013-08-09 05:49:15	18.26	20.97		8.60266	-18.6137	-21.3761
2013-08-09 05:59:15	18.28	21		8.60961	-18.634	-21.4067	2013-08-09 05:59:15
2013-08-09 06:09:15	18.31	21		8.61655	-18.6646	-21.4067
2013-08-09 06:19:15	18.35	21.03		8.6235	-18.7054	-21.4373
2013-08-09 06:29:15	18.37	21.08		8.63044	-18.7258	-21.4883
2013-08-09 06:39:15	18.41	21.11		8.63738	-18.7666	-21.5189
2013-08-09 06:49:15	18.44	21.15		8.64433	-18.7971	-21.5596
2013-08-09 06:59:15	18.47	21.18		8.65127	-18.8277	-21.5902	2013-08-09 06:59:15
2013-08-09 07:09:15	18.5	21.2		8.65822	-18.8583	-21.6106
2013-08-09 07:19:15	18.52	21.22		8.66516	-18.8787	-21.631
2013-08-09 07:29:15	18.55	21.24		8.67211	-18.9093	-21.6514
2013-08-09 07:39:15	18.57	21.25		8.67905	-18.9297	-21.6616
2013-08-09 07:49:15	18.59	21.28		8.686	-18.9501	-21.6922
2013-08-09 07:59:15	18.62	21.31		8.69294	-18.9806	-21.7227	2013-08-09 07:59:15
2013-08-09 08:09:15	18.64	21.32		8.69988	-19.001	-21.7329
2013-08-09 08:19:15	18.67	21.38		8.70683	-19.0316	-21.7941
2013-08-09 08:29:15	18.69	21.4		8.71377	-19.052	-21.8145
2013-08-09 08:39:15	18.72	21.41		8.72072	-19.0826	-21.8247
2013-08-09 08:49:15	18.75	21.45		8.72766	-19.1131	-21.8654
2013-08-09 08:59:15	18.78	21.51		8.73461	-19.1437	-21.9266	2013-08-09 08:59:15
2013-08-09 09:09:15	18.82	21.55		8.74155	-19.1845	-21.9674
2013-08-09 09:19:15	18.86	21.57		8.7485	-19.2253	-21.9878
2013-08-09 09:29:15	18.93	21.68		8.75544	-19.2966	-22.0999
2013-08-09 09:39:15	18.99	21.71		8.76238	-19.3578	-22.1305
2013-08-09 09:49:15	19	21.74		8.76933	-19.368	-22.1611
2013-08-09 09:59:15	19.02	21.74		8.77627	-19.3884	-22.1611	2013-08-09 09:59:15
2013-08-09 10:09:15	19.06	21.77		8.78322	-19.4292	-22.1916
2013-08-09 10:19:15	19.1	21.83		8.79016	-19.4699	-22.2528
2013-08-09 10:29:15	19.12	21.83		8.79711	-19.4903	-22.2528
2013-08-09 10:39:15	19.16	21.87		8.80405	-19.5311	-22.2936
2013-08-09 10:49:15	19.19	21.92		8.811	-19.5617	-22.3445
2013-08-09 10:59:15	19.22	21.95		8.81794	-19.5923	-22.3751	2013-08-09 10:59:15
2013-08-09 11:09:15	19.25	21.97		8.82488	-19.6228	-22.3955
2013-08-09 11:19:15	19.27	22.01		8.83183	-19.6432	-22.4363
2013-08-09 11:29:15	19.31	22.05		8.83877	-19.684	-22.4771
2013-08-09 11:39:15	19.33	22.07		8.84572	-19.7044	-22.4975
2013-08-09 11:49:15	19.39	22.12		8.85266	-19.7655	-22.5484
2013-08-09 11:59:15	19.4	22.14		8.85961	-19.7757	-22.5688	2013-08-09 11:59:15
2013-08-09 12:09:15	19.38	22.2		8.86655	-19.7554	-22.63
2013-08-09 12:19:15	19.47	22.2		8.8735	-19.8471	-22.63
2013-08-09 12:29:15	19.49	22.24		8.88044	-19.8675	-22.6707
2013-08-09 12:39:15	19.53	22.27		8.88738	-19.9083	-22.7013
2013-08-09 12:49:15	19.56	22.32		8.89433	-19.9388	-22.7523
2013-08-09 12:59:15	19.61	22.33		8.90127	-19.9898	-22.7625	2013-08-09 12:59:15
2013-08-09 13:09:15	19.64	22.4		8.90822	-20.0204	-22.8338
2013-08-09 13:19:15	19.49	22.23		8.91516	-19.8675	-22.6606
2013-08-09 13:29:15	19.64	22.4		8.92211	-20.0204	-22.8338
2013-08-09 13:39:15	19.69	22.44		8.92905	-20.0714	-22.8746
2013-08-09 13:49:15	19.73	22.48		8.936	-20.1121	-22.9154
2013-08-09 13:59:15	19.77	22.55		8.94294	-20.1529	-22.9867	2013-08-09 13:59:15
2013-08-09 14:09:15	19.81	22.58		8.94988	-20.1937	-23.0173
2013-08-09 14:19:15	19.87	22.61		8.95683	-20.2548	-23.0479
2013-08-09 14:29:15	19.92	22.67		8.96377	-20.3058	-23.1091
2013-08-09 14:39:15	19.95	22.73		8.97072	-20.3364	-23.1702
2013-08-09 14:49:15	20	22.75		8.97766	-20.3874	-23.1906
2013-08-09 14:59:15	20.04	22.81		8.98461	-20.4281	-23.2518	2013-08-09 14:59:15
2013-08-09 15:09:15	20.07	22.87		8.99155	-20.4587	-23.3129
2013-08-09 15:19:15	20.11	22.88		8.9985	-20.4995	-23.3231
2013-08-09 15:29:15	20.15	22.91		9.00544	-20.5403	-23.3537
2013-08-09 15:39:15	20.19	22.99		9.01238	-20.581	-23.4353
2013-08-09 15:49:15	20.24	23.02		9.01933	-20.632	-23.4659
2013-08-09 15:59:15	20.27	23.07		9.02627	-20.6626	-23.5168	2013-08-09 15:59:15
2013-08-09 16:09:15	20.34	23.13		9.03322	-20.7339	-23.578
2013-08-09 16:19:15	20.39	23.16		9.04016	-20.7849	-23.6086
2013-08-09 16:29:15	20.44	23.22		9.04711	-20.8359	-23.6697
2013-08-09 16:39:15	20.48	23.3		9.05405	-20.8767	-23.7513
2013-08-09 16:49:15	20.53	23.33		9.061	-20.9276	-23.7819
2013-08-09 16:59:15	20.55	23.35		9.06794	-20.948	-23.8022	2013-08-09 16:59:15
2013-08-09 17:09:15	20.62	23.41		9.07488	-21.0194	-23.8634
2013-08-09 17:19:15	20.68	23.48		9.08183	-21.0805	-23.9348
2013-08-09 17:29:15	20.73	23.52		9.08877	-21.1315	-23.9755
2013-08-09 17:39:15	20.77	23.59		9.09572	-21.1723	-24.0469
2013-08-09 17:49:15	20.84	23.62		9.10266	-21.2436	-24.0775
2013-08-09 17:59:15	20.89	23.69		9.10961	-21.2946	-24.1488	2013-08-09 17:59:15
2013-08-09 18:09:15	20.92	23.74		9.11655	-21.3252	-24.1998
2013-08-09 18:19:15	20.99	23.76		9.1235	-21.3965	-24.2202
2013-08-09 18:29:15	21.04	23.85		9.13044	-21.4475	-24.3119
2013-08-09 18:39:15	21.03	23.83		9.13738	-21.4373	-24.2915
2013-08-09 18:49:15	21.08	23.9		9.14433	-21.4883	-24.3629
2013-08-09 18:59:15	21.15	23.97		9.15127	-21.5596	-24.4343	2013-08-09 18:59:15
2013-08-09 19:09:15	21.21	24.04		9.15822	-21.6208	-24.5056
2013-08-09 19:19:15	21.27	24.06		9.16516	-21.682	-24.526
2013-08-09 19:29:15	21.33	24.13		9.17211	-21.7431	-24.5973
2013-08-09 19:39:15	21.38	24.16		9.17905	-21.7941	-24.6279
2013-08-09 19:49:15	21.43	24.24		9.186	-21.8451	-24.7095
2013-08-09 19:59:15	21.49	24.3		9.19294	-21.9062	-24.7706	2013-08-09 19:59:15
2013-08-09 20:09:15	21.55	24.36		9.19988	-21.9674	-24.8318
2013-08-09 20:19:15	21.52	24.33		9.20683	-21.9368	-24.8012
2013-08-09 20:29:15	21.58	24.41		9.21377	-21.998	-24.8828
2013-08-09 20:39:15	21.62	24.43		9.22072	-22.0387	-24.9032
2013-08-09 20:49:15	21.68	24.49		9.22766	-22.0999	-24.9643
2013-08-09 20:59:15	21.74	24.51		9.23461	-22.1611	-24.9847	2013-08-09 20:59:15
2013-08-09 21:09:15	21.78	24.59		9.24155	-22.2018	-25.0663
2013-08-09 21:19:15	21.84	24.62		9.2485	-22.263	-25.0968
2013-08-09 21:29:15	21.87	24.65		9.25544	-22.2936	-25.1274
2013-08-09 21:39:15	21.94	24.77		9.26238	-22.3649	-25.2497
2013-08-09 21:49:15	21.99	24.72		9.26933	-22.4159	-25.1988
2013-08-09 21:59:15	22.03	24.82		9.27627	-22.4567	-25.3007	2013-08-09 21:59:15
2013-08-09 22:09:15	22.09	24.89		9.28322	-22.5178	-25.3721
2013-08-09 22:19:15	22.13	24.94		9.29016	-22.5586	-25.423
2013-08-09 22:29:15	22.19	24.97		9.29711	-22.6198	-25.4536
2013-08-09 22:49:15	22.29	25.11		9.311	-22.7217	-25.5963
2013-08-09 22:59:15	22.36	25.14		9.31794	-22.7931	-25.6269
2013-08-09 23:09:15	22.4	25.18		9.32488	-22.8338	-25.6677	2013-08-09 23:09:15
2013-08-09 23:19:15	22.45	25.23		9.33183	-22.8848	-25.7187
2013-08-09 23:29:15	22.5	25.31		9.33877	-22.9358	-25.8002
2013-08-09 23:39:15	22.55	25.36		9.34572	-22.9867	-25.8512
2013-08-09 23:49:15	22.62	25.41		9.35266	-23.0581	-25.9021
2013-08-09 23:59:15	22.66	25.46		9.35961	-23.0989	-25.9531
2013-08-10 00:09:15	22.7	25.52		9.36655	-23.1397	-26.0143	2013-08-10 00:09:15
2013-08-10 00:19:15	22.76	25.57		9.3735	-23.2008	-26.0652
2013-08-10 00:29:15	22.8	25.6		9.38044	-23.2416	-26.0958
2013-08-10 00:39:15	22.87	25.68		9.38738	-23.3129	-26.1774
2013-08-10 00:49:15	22.91	25.71		9.39433	-23.3537	-26.208
2013-08-10 00:59:15	22.95	25.74		9.40127	-23.3945	-26.2385
2013-08-10 01:09:15	23.01	25.8		9.40822	-23.4557	-26.2997	2013-08-10 01:09:15
2013-08-10 01:19:15	23.06	25.87		9.41516	-23.5066	-26.371
2013-08-10 01:29:15	23.12	25.93		9.42211	-23.5678	-26.4322
2013-08-10 01:39:15	23.17	25.99		9.42905	-23.6188	-26.4934
2013-08-10 01:49:15	23.22	26.02		9.436	-23.6697	-26.524
2013-08-10 01:59:15	23.26	26.06		9.44294	-23.7105	-26.5647
2013-08-10 02:09:15	23.32	26.14		9.44988	-23.7717	-26.6463	2013-08-10 02:09:15
2013-08-10 02:19:15	23.39	26.19		9.45683	-23.843	-26.6972
2013-08-10 02:29:15	23.42	26.28		9.46377	-23.8736	-26.789
2013-08-10 02:39:15	23.51	26.33		9.47072	-23.9653	-26.84
2013-08-10 02:49:15	23.56	26.37		9.47766	-24.0163	-26.8807
2013-08-10 02:59:15	23.62	26.43		9.48461	-24.0775	-26.9419
2013-08-10 03:09:15	23.67	26.48		9.49155	-24.1284	-26.9929	2013-08-10 03:09:15
2013-08-10 03:19:15	23.74	26.55		9.4985	-24.1998	-27.0642
2013-08-10 03:29:15	23.78	26.63		9.50544	-24.2406	-27.1458
2013-08-10 03:39:15	23.84	26.67		9.51238	-24.3017	-27.1865
2013-08-10 03:49:15	23.92	26.73		9.51933	-24.3833	-27.2477
2013-08-10 03:59:15	23.97	26.8		9.52627	-24.4343	-27.3191
2013-08-10 04:09:15	24.03	26.86		9.53322	-24.4954	-27.3802	2013-08-10 04:09:15
2013-08-10 04:19:15	24.08	26.91		9.54016	-24.5464	-27.4312
2013-08-10 04:29:15	24.16	26.98		9.54711	-24.6279	-27.5025
2013-08-10 04:39:15	24.22	27.05		9.55405	-24.6891	-27.5739
2013-08-10 04:49:15	24.28	27.1		9.561	-24.7503	-27.6249
2013-08-10 04:59:15	24.33	27.16		9.56794	-24.8012	-27.686
2013-08-10 05:09:15	24.41	27.22		9.57488	-24.8828	-27.7472	2013-08-10 05:09:15
2013-08-10 05:19:15	24.45	27.29		9.58183	-24.9235	-27.8186
2013-08-10 05:29:15	24.52	27.35		9.58877	-24.9949	-27.8797
2013-08-10 05:39:15	24.59	27.43		9.59572	-25.0663	-27.9613
2013-08-10 05:49:15	24.68	27.49		9.60266	-25.158	-28.0224
2013-08-10 05:59:15	24.72	27.55		9.60961	-25.1988	-28.0836
2013-08-10 06:09:15	24.79	27.63		9.61655	-25.2701	-28.1651	2013-08-10 06:09:15
2013-08-10 06:19:15	24.86	27.71		9.6235	-25.3415	-28.2467
2013-08-10 06:29:15	24.93	27.78		9.63044	-25.4128	-28.318
2013-08-10 06:39:15	24.99	27.82		9.63738	-25.474	-28.3588
2013-08-10 06:49:15	25.08	27.9		9.64433	-25.5657	-28.4404
2013-08-10 06:59:15	25.13	27.98		9.65127	-25.6167	-28.5219
2013-08-10 07:09:15	25.2	28.06		9.65822	-25.6881	-28.6035	2013-08-10 07:09:15
2013-08-10 07:19:15	25.27	28.12		9.66516	-25.7594	-28.6646
2013-08-10 07:29:15	25.36	28.13		9.67211	-25.8512	-28.6748
2013-08-10 07:39:15	25.42	28.25		9.67905	-25.9123	-28.7971
2013-08-10 07:49:15	25.51	28.33		9.686	-26.0041	-28.8787
2013-08-10 07:59:15	25.56	28.4		9.69294	-26.055	-28.9501
2013-08-10 08:09:15	25.64	28.47		9.69988	-26.1366	-29.0214	2013-08-10 08:09:15
2013-08-10 08:19:15	25.71	28.6		9.70683	-26.208	-29.1539
2013-08-10 08:29:15	25.8	28.64		9.71377	-26.2997	-29.1947
2013-08-10 08:39:15	25.86	28.71		9.72072	-26.3609	-29.2661
2013-08-10 08:49:15	25.94	28.79		9.72766	-26.4424	-29.3476
2013-08-10 08:59:15	25.99	28.84		9.73461	-26.4934	-29.3986
2013-08-10 09:09:15	26.06	28.94		9.74155	-26.5647	-29.5005	2013-08-10 09:09:15
2013-08-10 09:19:15	26.13	29.01		9.7485	-26.6361	-29.5719
2013-08-10 09:29:15	26.22	29.14		9.75544	-26.7278	-29.7044
2013-08-10 09:39:15	26.33	29.22		9.76238	-26.84	-29.7859
2013-08-10 09:49:15	26.38	29.24		9.76933	-26.8909	-29.8063
2013-08-10 09:59:15	26.41	29.3		9.77627	-26.9215	-29.8675
2013-08-10 10:09:15	26.5	29.38		9.78322	-27.0133	-29.949	2013-08-10 10:09:15
2013-08-10 10:19:15	26.59	29.47		9.79016	-27.105	-30.0408
2013-08-10 10:29:15	26.68	29.58		9.79711	-27.1967	-30.1529
2013-08-10 10:39:15	26.72	29.61		9.80405	-27.2375	-30.1835
2013-08-10 10:49:15	26.82	29.74		9.811	-27.3394	-30.316
2013-08-10 10:59:15	26.89	29.79		9.81794	-27.4108	-30.367
2013-08-10 11:09:15	26.97	29.9		9.82488	-27.4924	-30.4791	2013-08-10 11:09:15
2013-08-10 11:19:15	27.02	29.91		9.83183	-27.5433	-30.4893
2013-08-10 11:29:15	27.14	30.04		9.83877	-27.6656	-30.6218
2013-08-10 11:39:15	27.21	30.11		9.84572	-27.737	-30.6932
2013-08-10 11:49:15	27.29	30.21		9.85266	-27.8186	-30.7951
2013-08-10 11:59:15	27.38	30.26		9.85961	-27.9103	-30.8461
2013-08-10 12:09:15	27.45	30.37		9.86655	-27.9817	-30.9582	2013-08-10 12:09:15
2013-08-10 12:19:15	27.51	30.44		9.8735	-28.0428	-31.0296
2013-08-10 12:29:15	27.61	30.52		9.88044	-28.1448	-31.1111
2013-08-10 12:39:15	27.69	30.59		9.88738	-28.2263	-31.1825
2013-08-10 12:49:15	27.81	30.7		9.89433	-28.3486	-31.2946
2013-08-10 12:59:15	27.86	30.75		9.90127	-28.3996	-31.3456
2013-08-10 13:09:15	27.96	30.87		9.90822	-28.5015	-31.4679	2013-08-10 13:09:15
2013-08-10 13:19:15	28.03	30.96		9.91516	-28.5729	-31.5596
2013-08-10 13:29:15	28.11	31.02		9.92211	-28.6544	-31.6208
2013-08-10 13:39:15	28.21	31.12		9.92905	-28.7564	-31.7227
2013-08-10 13:49:15	28.28	31.17		9.936	-28.8277	-31.7737
2013-08-10 13:59:15	28.38	31.3		9.94294	-28.9297	-31.9062
2013-08-10 14:09:15	28.45	31.36		9.94988	-29.001	-31.9674	2013-08-10 14:09:15
2013-08-10 14:19:15	28.55	31.5		9.95683	-29.103	-32.1101
2013-08-10 14:29:15	28.66	31.54		9.96377	-29.2151	-32.1509
2013-08-10 14:39:15	28.75	31.68		9.97072	-29.3068	-32.2936
2013-08-10 14:49:15	28.84	31.79		9.97766	-29.3986	-32.4057
2013-08-10 14:59:15	28.92	31.84		9.98461	-29.4801	-32.4567
2013-08-10 15:09:15	29.02	31.97		9.99155	-29.5821	-32.5892	2013-08-10 15:09:15
2013-08-10 15:19:15	29.07	32.02		9.9985	-29.633	-32.6402
2013-08-10 15:29:15	29.14	32.12		10.0054	-29.7044	-32.7421
2013-08-10 15:39:15	29.27	32.23		10.0124	-29.8369	-32.8542
2013-08-10 15:49:15	29.34	32.29		10.0193	-29.9083	-32.9154
2013-08-10 15:59:15	29.46	32.43		10.0263	-30.0306	-33.0581
2013-08-10 16:09:15	29.54	32.48		10.0332	-30.1121	-33.1091	2013-08-10 16:09:15
2013-08-10 16:19:15	29.67	32.64		10.0402	-30.2446	-33.2722
2013-08-10 16:29:15	29.77	32.81		10.0471	-30.3466	-33.4455
2013-08-10 16:49:15	29.98	32.97		10.061	-30.5607	-33.6086
2013-08-10 16:59:15	30.11	33.11		10.0679	-30.6932	-33.7513
2013-08-10 17:09:15	30.2	33.18		10.0749	-30.7849	-33.8226
2013-08-10 17:19:15	30.3	33.3		10.0818	-30.8869	-33.945	2013-08-10 17:19:15
2013-08-10 17:29:15	30.42	33.4		10.0888	-31.0092	-34.0469
2013-08-10 17:39:15	30.18	33.31		10.0957	-30.7645	-33.9551
2013-08-10 17:49:15	30.61	33.62		10.1027	-31.2029	-34.2712
2013-08-10 17:59:15	30.7	33.73		10.1096	-31.2946	-34.3833
2013-08-10 18:09:15	30.86	33.86		10.1166	-31.4577	-34.5158
2013-08-10 18:19:15	30.97	33.98		10.1235	-31.5698	-34.6381	2013-08-10 18:19:15
2013-08-10 18:29:15	31.08	34.14		10.1304	-31.682	-34.8012
2013-08-10 18:39:15	31.22	34.26		10.1374	-31.8247	-34.9235
2013-08-10 18:49:15	31.35	34.39		10.1443	-31.9572	-35.0561
2013-08-10 18:59:15	31.44	34.5		10.1513	-32.0489	-35.1682
2013-08-10 19:09:15	31.6	34.65		10.1582	-32.212	-35.3211
2013-08-10 19:19:15	31.7	34.75		10.1652	-32.314	-35.423	2013-08-10 19:19:15
2013-08-10 19:29:15	31.81	34.8		10.1721	-32.4261	-35.474
2013-08-10 19:39:15	31.95	34.99		10.1791	-32.5688	-35.6677
2013-08-10 19:49:15	32.04	35.08		10.186	-32.6606	-35.7594
2013-08-10 19:59:15	32.19	35.26		10.1929	-32.8135	-35.9429
2013-08-10 20:09:15	32.29	35.29		10.1999	-32.9154	-35.9735
2013-08-10 20:19:15	32.41	35.49		10.2068	-33.0377	-36.1774	2013-08-10 20:19:15
2013-08-10 20:29:15	32.52	35.56		10.2138	-33.1498	-36.2487
2013-08-10 20:39:15	32.63	35.67		10.2207	-33.262	-36.3609
2013-08-10 20:49:15	32.77	35.82		10.2277	-33.4047	-36.5138
2013-08-10 20:59:15	32.88	35.89		10.2346	-33.5168	-36.5851
2013-08-10 21:09:15	32.99	36.02		10.2416	-33.629	-36.7176
2013-08-10 21:19:15	33.13	36.19		10.2485	-33.7717	-36.8909	2013-08-10 21:19:15
2013-08-10 21:29:15	33.26	36.31		10.2554	-33.9042	-37.0133
2013-08-10 21:39:15	33.37	36.43		10.2624	-34.0163	-37.1356
2013-08-10 21:49:15	33.51	36.53		10.2693	-34.159	-37.2375
2013-08-10 21:59:15	33.63	36.7		10.2763	-34.2813	-37.4108
2013-08-10 22:09:15	33.77	36.83		10.2832	-34.4241	-37.5433
2013-08-10 22:19:15	33.88	36.94		10.2902	-34.5362	-37.6555	2013-08-10 22:19:15
2013-08-10 22:29:15	33.98	37.04		10.2971	-34.6381	-37.7574
2013-08-10 22:39:15	34.13	37.23		10.3041	-34.791	-37.9511
2013-08-10 22:49:15	34.26	37.33		10.311	-34.9235	-38.053
2013-08-10 22:59:15	34.35	37.43		10.3179	-35.0153	-38.1549
2013-08-10 23:09:15	34.5	37.54		10.3249	-35.1682	-38.2671
2013-08-10 23:19:15	34.61	37.69		10.3318	-35.2803	-38.42	2013-08-10 23:19:15
2013-08-10 23:29:15	34.75	37.8		10.3388	-35.423	-38.5321
2013-08-10 23:39:15	34.89	38		10.3457	-35.5657	-38.736
2013-08-10 23:49:15	35.04	38.12		10.3527	-35.7187	-38.8583
2013-08-10 23:59:15	35.17	38.22		10.3596	-35.8512	-38.9602
2013-08-11 00:09:15	35.29	38.35		10.3666	-35.9735	-39.0928
2013-08-11 00:19:15	35.38	38.5		10.3735	-36.0652	-39.2457	2013-08-11 00:19:15
2013-08-11 00:29:15	35.53	38.61		10.3804	-36.2181	-39.3578
2013-08-11 00:39:15	35.68	38.73		10.3874	-36.371	-39.4801
2013-08-11 00:49:15	35.81	38.9		10.3943	-36.5036	-39.6534
2013-08-11 00:59:15	35.96	39.05		10.4013	-36.6565	-39.8063
2013-08-11 01:09:15	36.11	39.2		10.4082	-36.8094	-39.9592
2013-08-11 01:19:15	36.25	39.37		10.4152	-36.9521	-40.1325	2013-08-11 01:19:15
2013-08-11 01:29:15	36.41	39.5		10.4221	-37.1152	-40.265
2013-08-11 01:39:15	36.55	39.67		10.4291	-37.2579	-40.4383
2013-08-11 01:49:15	36.7	39.86		10.436	-37.4108	-40.632
2013-08-11 01:59:15	36.84	40		10.4429	-37.5535	-40.7747
2013-08-11 02:09:15	37.02	40.16		10.4499	-37.737	-40.9378
2013-08-11 02:19:15	37.19	40.4		10.4568	-37.9103	-41.1825	2013-08-11 02:19:15
2013-08-11 02:29:15	37.37	40.53		10.4638	-38.0938	-41.315
2013-08-11 02:39:15	37.52	40.7		10.4707	-38.2467	-41.4883
2013-08-11 02:49:15	37.66	40.83		10.4777	-38.3894	-41.6208
2013-08-11 02:59:15	37.86	41.03		10.4846	-38.5933	-41.8247
2013-08-11 03:09:15	38.06	41.22		10.4916	-38.7971	-42.0183
2013-08-11 03:19:15	38.22	41.39		10.4985	-38.9602	-42.1916	2013-08-11 03:19:15
2013-08-11 03:29:15	38.4	41.54		10.5054	-39.1437	-42.3445
2013-08-11 03:39:15	38.56	41.75		10.5124	-39.3068	-42.5586
2013-08-11 03:49:15	38.74	41.94		10.5193	-39.4903	-42.7523
2013-08-11 03:59:15	38.94	42.15		10.5263	-39.6942	-42.9664
2013-08-11 04:09:15	39.11	42.34		10.5332	-39.8675	-43.16
2013-08-11 04:19:15	39.27	42.55		10.5402	-40.0306	-43.3741	2013-08-11 04:19:15
2013-08-11 04:29:15	39.47	42.74		10.5471	-40.2345	-43.5678
2013-08-11 04:39:15	39.68	42.88		10.5541	-40.4485	-43.7105
2013-08-11 04:49:15	39.89	43.07		10.561	-40.6626	-43.9042
2013-08-11 04:59:15	40.06	43.28		10.5679	-40.8359	-44.1182
2013-08-11 05:09:15	40.25	43.54		10.5749	-41.0296	-44.3833
2013-08-11 05:19:15	40.44	43.7		10.5818	-41.2232	-44.5464	2013-08-11 05:19:15
2013-08-11 05:29:15	40.57	43.89		10.5888	-41.3558	-44.7401
2013-08-11 05:39:15	40.83	44.16		10.5957	-41.6208	-45.0153
2013-08-11 05:49:15	41.08	44.36		10.6027	-41.8756	-45.2192
2013-08-11 05:59:15	41.29	44.59		10.6096	-42.0897	-45.4536
2013-08-11 06:19:15	41.73	45.03		10.6235	-42.5382	-45.9021
2013-08-11 06:29:15	41.96	45.23		10.6304	-42.7727	-46.106	2013-08-11 06:29:15
2013-08-11 06:39:15	42.11	45.47		10.6374	-42.9256	-46.3507
2013-08-11 06:49:15	42.37	45.69		10.6443	-43.1906	-46.5749
2013-08-11 06:59:15	42.58	45.93		10.6513	-43.4047	-46.8196
2013-08-11 07:09:15	42.83	46.15		10.6582	-43.6595	-47.0438
2013-08-11 07:19:15	43.06	46.38		10.6652	-43.894	-47.2783
2013-08-11 07:29:15	43.28	46.6		10.6721	-44.1182	-47.5025	2013-08-11 07:29:15
2013-08-11 07:39:15	43.51	46.84		10.6791	-44.3527	-47.7472
2013-08-11 07:49:15	43.73	47.01		10.686	-44.577	-47.9205
2013-08-11 07:59:15	43.98	47.28		10.6929	-44.8318	-48.1957
2013-08-11 08:09:15	44.21	47.56		10.6999	-45.0663	-48.4811
2013-08-11 08:19:15	44.41	47.78		10.7068	-45.2701	-48.7054
2013-08-11 08:29:15	44.69	48.05		10.7138	-45.5556	-48.9806	2013-08-11 08:29:15
2013-08-11 08:39:15	44.93	48.35		10.7207	-45.8002	-49.2864
2013-08-11 08:49:15	45.17	48.59		10.7277	-46.0449	-49.5311
2013-08-11 08:59:15	45.44	48.83		10.7346	-46.3201	-49.7757
2013-08-11 09:09:15	45.67	49.07		10.7416	-46.5545	-50.0204
2013-08-11 09:19:15	45.9	49.34		10.7485	-46.789	-50.2956
2013-08-11 09:29:15	46.17	49.58		10.7554	-47.0642	-50.5403	2013-08-11 09:29:15
2013-08-11 09:39:15	46.42	49.84		10.7624	-47.3191	-50.8053
2013-08-11 09:49:15	46.65	50.11		10.7693	-47.5535	-51.0805
2013-08-11 09:59:15	46.93	50.36		10.7763	-47.8389	-51.3354
2013-08-11 10:09:15	47.19	50.67		10.7832	-48.104	-51.6514
2013-08-11 10:19:15	47.47	50.9		10.7902	-48.3894	-51.8858
2013-08-11 10:29:15	47.77	51.18		10.7971	-48.6952	-52.1713	2013-08-11 10:29:15
2013-08-11 10:39:15	48	51.48		10.8041	-48.9297	-52.4771
2013-08-11 10:49:15	48.25	51.72		10.811	-49.1845	-52.7217
2013-08-11 10:59:15	48.5	51.98		10.8179	-49.4393	-52.9867
2013-08-11 11:09:15	48.74	52.23		10.8249	-49.684	-53.2416
2013-08-11 11:19:15	49.01	52.58		10.8318	-49.9592	-53.5984
2013-08-11 11:29:15	49.28	52.84		10.8388	-50.2345	-53.8634	2013-08-11 11:29:15
2013-08-11 11:39:15	49.54	53.3		10.8457	-50.4995	-54.3323
2013-08-11 11:49:15	49.89	53.5		10.8527	-50.8563	-54.5362
2013-08-11 11:59:15	50.12	53.64		10.8596	-51.0907	-54.6789
2013-08-11 12:09:15	50.42	53.97		10.8666	-51.3965	-55.0153
2013-08-11 12:19:15	50.76	54.24		10.8735	-51.7431	-55.2905
2013-08-11 12:29:15	51.01	54.62		10.8804	-51.998	-55.6779	2013-08-11 12:29:15
2013-08-11 12:39:15	51.31	54.99		10.8874	-52.3038	-56.055
2013-08-11 12:49:15	51.63	55.32		10.8943	-52.63	-56.3914
2013-08-11 12:59:15	51.77	55.3		10.9013	-52.7727	-56.371
2013-08-11 13:09:15	52.17	55.98		10.9082	-53.1804	-57.0642
2013-08-11 13:19:15	52.55	56.18		10.9152	-53.5678	-57.2681
2013-08-11 13:29:15	52.84	56.52		10.9221	-53.8634	-57.6147	2013-08-11 13:29:15
2013-08-11 13:39:15	53.24	57.01		10.9291	-54.2712	-58.1142
2013-08-11 13:49:15	53.53	57.19		10.936	-54.5668	-58.2977
2013-08-11 13:59:15	53.76	57.52		10.9429	-54.8012	-58.634
2013-08-11 14:09:15	54.07	57.9		10.9499	-55.1172	-59.0214
2013-08-11 14:19:15	54.41	58.14		10.9568	-55.4638	-59.2661
2013-08-11 14:29:15	54.74	58.53		10.9638	-55.8002	-59.6636	2013-08-11 14:29:15
2013-08-11 14:39:15	55.12	58.92		10.9707	-56.1876	-60.0612
2013-08-11 14:49:15	55.41	59.08		10.9777	-56.4832	-60.2243
2013-08-11 14:59:15	55.67	59.55		10.9846	-56.7482	-60.7034
2013-08-11 15:09:15	56.04	59.84		10.9916	-57.1254	-60.999
2013-08-11 15:19:15	56.37	60.2		10.9985	-57.4618	-61.366
2013-08-11 15:29:15	56.72	60.64		11.0054	-57.8186	-61.8145	2013-08-11 15:29:15
2013-08-11 15:39:15	57.08	60.98		11.0124	-58.1855	-62.1611
2013-08-11 15:49:15	57.39	61.27		11.0193	-58.5015	-62.4567
2013-08-11 15:59:15	57.7	61.64		11.0263	-58.8175	-62.8338
2013-08-11 16:09:15	58.03	62.02		11.0332	-59.1539	-63.2212
2013-08-11 16:19:15	58.42	62.41		11.0402	-59.5515	-63.6188
2013-08-11 16:29:15	58.75	62.8		11.0471	-59.8879	-64.0163	2013-08-11 16:29:15
2013-08-11 16:39:15	59.16	63.23		11.0541	-60.3058	-64.4546
2013-08-11 16:49:15	59.62	63.63		11.061	-60.7747	-64.8624
2013-08-11 16:59:15	59.96	63.95		11.0679	-61.1213	-65.1886
2013-08-11 17:09:15	60.36	64.35		11.0749	-61.5291	-65.5963
2013-08-11 17:19:15	60.77	64.92		11.0818	-61.947	-66.1774
2013-08-11 17:29:15	61.18	65.3		11.0888	-62.3649	-66.5647	2013-08-11 17:29:15
2013-08-11 17:39:15	61.58	65.62		11.0957	-62.7727	-66.8909
2013-08-11 17:49:15	61.92	65.98		11.1027	-63.1193	-67.2579
2013-08-11 17:59:15	62.35	66.55		11.1096	-63.5576	-67.8389
2013-08-11 18:09:15	62.76	66.87		11.1166	-63.9755	-68.1651
2013-08-11 18:19:15	63.18	67.25		11.1235	-64.4037	-68.5525
2013-08-11 18:29:15	63.59	67.74		11.1304	-64.8216	-69.052	2013-08-11 18:29:15
2013-08-11 18:39:15	64.03	68.25		11.1374	-65.2701	-69.5719
2013-08-11 18:49:15	64.46	68.62		11.1443	-65.7085	-69.949
2013-08-11 18:59:15	64.84	68.98		11.1513	-66.0958	-70.316
2013-08-11 19:09:15	65.26	69.47		11.1582	-66.524	-70.8155
2013-08-11 19:19:15	65.7	69.95		11.1652	-66.9725	-71.3048
2013-08-11 19:29:15	66.07	70.29		11.1721	-67.3496	-71.6514	2013-08-11 19:29:15
2013-08-11 19:39:15	66.58	70.75		11.1791	-67.8695	-72.1203
2013-08-11 19:49:15	66.92	71.11		11.186	-68.2161	-72.4873
2013-08-11 19:59:15	67.29	71.57		11.1929	-68.5933	-72.9562
2013-08-11 20:09:15	67.74	72		11.1999	-69.052	-73.3945
2013-08-11 20:19:15	68.19	72.48		11.2068	-69.5107	-73.8838
2013-08-11 20:29:15	68.44	72.72		11.2138	-69.7655	-74.1284	2013-08-11 20:29:15
2013-08-11 20:39:15	69.01	73.36		11.2207	-70.3466	-74.7808
2013-08-11 20:49:15	69.45	73.76		11.2277	-70.7951	-75.1886
2013-08-11 20:59:15	69.87	74.03		11.2346	-71.2232	-75.4638
2013-08-11 21:09:15	70.23	74.57		11.2416	-71.5902	-76.0143
2013-08-11 21:19:15	70.63	74.99		11.2485	-71.998	-76.4424
2013-08-11 21:29:15	71.13	75.55		11.2554	-72.5076	-77.0133	2013-08-11 21:29:15
2013-08-11 21:39:15	71.5	75.97		11.2624	-72.8848	-77.4414
2013-08-11 21:59:15	72.34	76.82		11.2763	-73.7411	-78.3078
2013-08-11 22:09:15	72.83	77.3		11.2832	-74.2406	-78.7971
2013-08-11 22:19:15	73.28	77.76		11.2902	-74.6993	-79.2661
2013-08-11 22:29:15	73.74	78.31		11.2971	-75.1682	-79.8267
2013-08-11 22:39:15	74.21	78.83		11.3041	-75.6473	-80.3568	2013-08-11 22:39:15
2013-08-11 22:49:15	74.68	79.24		11.311	-76.1264	-80.7747
2013-08-11 22:59:15	75.07	79.62		11.3179	-76.524	-81.1621
2013-08-11 23:09:15	75.47	79.97		11.3249	-76.9317	-81.5189
2013-08-11 23:19:15	75.86	80.48		11.3318	-77.3293	-82.0387
2013-08-11 23:29:15	76.32	80.9		11.3388	-77.7982	-82.4669
2013-08-11 23:39:15	76.79	81.27		11.3457	-78.2773	-82.844	2013-08-11 23:39:15
2013-08-11 23:49:15	77.16	81.78		11.3527	-78.6544	-83.3639
2013-08-11 23:59:15	77.59	82.17		11.3596	-79.0928	-83.7615
2013-08-12 00:09:15	78	82.57		11.3666	-79.5107	-84.1692
2013-08-12 00:19:15	78.42	83.08		11.3735	-79.9388	-84.6891
2013-08-12 00:29:15	78.85	83.52		11.3804	-80.3772	-85.1376
2013-08-12 00:39:15	79.27	83.93		11.3874	-80.8053	-85.5556	2013-08-12 00:39:15
2013-08-12 00:49:15	79.7	84.23		11.3943	-81.2436	-85.8614
2013-08-12 00:59:15	80.14	84.78		11.4013	-81.6922	-86.422
2013-08-12 01:09:15	80.55	85.13		11.4082	-82.1101	-86.7788
2013-08-12 01:19:15	80.95	85.64		11.4152	-82.5178	-87.2987
2013-08-12 01:29:15	81.33	85.99		11.4221	-82.9052	-87.6555
2013-08-12 01:39:15	81.69	86.43		11.4291	-83.2722	-88.104	2013-08-12 01:39:15
2013-08-12 01:49:15	82.09	86.92		11.436	-83.6799	-88.6035
2013-08-12 01:59:15	82.39	87.24		11.4429	-83.9857	-88.9297
2013-08-12 02:09:15	82.85	87.69		11.4499	-84.4546	-89.3884
2013-08-12 02:19:15	83.24	88.02		11.4568	-84.8522	-89.7248
2013-08-12 02:29:15	83.58	88.42		11.4638	-85.1988	-90.1325
2013-08-12 02:39:15	83.88	88.8		11.4707	-85.5046	-90.5199	2013-08-12 02:39:15
2013-08-12 02:49:15	84.29	89.23		11.4777	-85.9225	-90.9582
2013-08-12 02:59:15	84.67	89.63		11.4846	-86.3099	-91.366
2013-08-12 03:09:15	85.07	90.04		11.4916	-86.7176	-91.7839
2013-08-12 03:19:15	85.47	90.42		11.4985	-87.1254	-92.1713
2013-08-12 03:29:15	85.88	90.72		11.5054	-87.5433	-92.4771
2013-08-12 03:39:15	86.17	91.17		11.5124	-87.8389	-92.9358	2013-08-12 03:39:15
2013-08-12 03:49:15	86.56	91.59		11.5193	-88.2365	-93.3639
2013-08-12 03:59:15	86.92	91.98		11.5263	-88.6035	-93.7615
2013-08-12 04:09:15	87.26	92.33		11.5332	-88.9501	-94.1182
2013-08-12 04:19:15	87.67	92.65		11.5402	-89.368	-94.4444
2013-08-12 04:29:15	87.98	93.06		11.5471	-89.684	-94.8624
2013-08-12 04:39:15	88.32	93.39		11.5541	-90.0306	-95.1988	2013-08-12 04:39:15
2013-08-12 04:59:15	88.99	93.95		11.5679	-90.7136	-95.7696
2013-08-12 05:09:15	89.34	94.42		11.5749	-91.0703	-96.2487
2013-08-12 05:19:15	89.69	94.8		11.5818	-91.4271	-96.6361
2013-08-12 05:29:15	90.02	95.24		11.5888	-91.7635	-97.0846
2013-08-12 05:39:15	90.36	95.58		11.5957	-92.1101	-97.4312
2013-08-12 05:49:15	90.66	95.99		11.6027	-92.4159	-97.8491	2013-08-12 05:49:15
2013-08-12 05:59:15	90.99	96.26		11.6096	-92.7523	-98.1244
2013-08-12 06:09:15	91.26	96.52		11.6166	-93.0275	-98.3894
2013-08-12 06:19:15	91.57	96.92		11.6235	-93.3435	-98.7971
2013-08-12 06:29:15	91.94	97.1		11.6304	-93.7207	-98.9806
2013-08-12 06:39:15	92.3	97.67		11.6374	-94.0877	-99.5617
2013-08-12 06:49:15	92.63	98		11.6443	-94.4241	-99.8981	2013-08-12 06:49:15
2013-08-12 06:59:15	92.9	98.37		11.6513	-94.6993	-100.275
2013-08-12 07:09:15	93.18	98.7		11.6582	-94.9847	-100.612
2013-08-12 07:19:15	93.56	99.07		11.6652	-95.3721	-100.989
2013-08-12 07:29:15	93.87	99.38		11.6721	-95.6881	-101.305
2013-08-12 07:39:15	93.91	99.66		11.6791	-95.7288	-101.59
2013-08-12 07:49:15	94.41	100.02		11.686	-96.2385	-101.957	2013-08-12 07:49:15
2013-08-12 07:59:15	94.74	100.35		11.6929	-96.5749	-102.294
2013-08-12 08:09:15	95.05	100.54		11.6999	-96.8909	-102.487
2013-08-12 08:19:15	95.34	101.01		11.7068	-97.1865	-102.966
2013-08-12 08:29:15	95.64	101.32		11.7138	-97.4924	-103.282
2013-08-12 08:39:15	95.84	101.56		11.7207	-97.6962	-103.527
2013-08-12 08:49:15	96.12	101.93		11.7277	-97.9817	-103.904	2013-08-12 08:49:15
2013-08-12 08:59:15	96.46	102.3		11.7346	-98.3282	-104.281
2013-08-12 09:09:15	96.59	102.66		11.7416	-98.4608	-104.648
2013-08-12 09:19:15	97.06	102.9		11.7485	-98.9399	-104.893
2013-08-12 09:29:15	97.18	103.17		11.7554	-99.0622	-105.168
2013-08-12 09:39:15	97.64	103.44		11.7624	-99.5311	-105.443
2013-08-12 09:49:15	97.88	103.72		11.7693	-99.7757	-105.729	2013-08-12 09:49:15
2013-08-12 09:59:15	98.24	104.18		11.7763	-100.143	-106.198
2013-08-12 10:09:15	98.48	104.53		11.7832	-100.387	-106.555
2013-08-12 10:19:15	98.78	104.97		11.7902	-100.693	-107.003
2013-08-12 10:29:15	99.15	105.25		11.7971	-101.07	-107.288
2013-08-12 10:39:15	99.45	105.5		11.8041	-101.376	-107.543
2013-08-12 10:49:15	99.76	105.87		11.811	-101.692	-107.92	2013-08-12 10:49:15
2013-08-12 10:59:15	100.06	106.21		11.8179	-101.998	-108.267
2013-08-12 11:09:15	100.28	106.48		11.8249	-102.222	-108.542
2013-08-12 11:19:15	100.57	106.81		11.8318	-102.518	-108.879
2013-08-12 11:29:15	100.73	107.33		11.8388	-102.681	-109.409
2013-08-12 11:39:15	101.23	107.49		11.8457	-103.191	-109.572
2013-08-12 11:49:15	101.48	107.82		11.8527	-103.445	-109.908	2013-08-12 11:49:15
2013-08-12 11:59:15	101.8	108.32		11.8596	-103.772	-110.418
2013-08-12 12:09:15	102.05	108.47		11.8666	-104.027	-110.571
2013-08-12 12:19:15	102.37	108.91		11.8735	-104.353	-111.019
2013-08-12 12:29:15	102.67	109.21		11.8804	-104.659	-111.325
2013-08-12 12:39:15	102.89	109.62		11.8874	-104.883	-111.743
2013-08-12 12:49:15	102.87	109.44		11.8943	-104.862	-111.56	2013-08-12 12:49:15
2013-08-12 12:59:15	103.35	109.98		11.9013	-105.352	-112.11
2013-08-12 13:09:15	103.7	110.56		11.9082	-105.708	-112.701
2013-08-12 13:19:15	104.01	110.75		11.9152	-106.024	-112.895
2013-08-12 13:29:15	104.13	110.99		11.9221	-106.147	-113.14
2013-08-12 13:39:15	104.6	111.51		11.9291	-106.626	-113.67
2013-08-12 13:49:15	104.84	111.72		11.936	-106.871	-113.884	2013-08-12 13:49:15
2013-08-12 13:59:15	105.19	112.01		11.9429	-107.227	-114.179
2013-08-12 14:09:15	105.49	112.4		11.9499	-107.533	-114.577
2013-08-12 14:19:15	105.76	112.61		11.9568	-107.808	-114.791
2013-08-12 14:29:15	105.78	113.14		11.9638	-107.829	-115.331
2013-08-12 14:39:15	106.41	113.34		11.9707	-108.471	-115.535
2013-08-12 14:49:15	106.69	113.67		11.9777	-108.756	-115.872	2013-08-12 14:49:15
2013-08-12 14:59:15	106.99	114.02		11.9846	-109.062	-116.228
2013-08-12 15:09:15	107.21	114.23		11.9916	-109.286	-116.442
2013-08-12 15:19:15	107.55	114.69		11.9985	-109.633	-116.911
2013-08-12 15:29:15	107.87	115.01		12.0054	-109.959	-117.238
2013-08-12 15:39:15	108.12	115.19		12.0124	-110.214	-117.421
2013-08-12 15:49:15	108.37	115.48		12.0193	-110.469	-117.717	2013-08-12 15:49:15
2013-08-12 15:59:15	108.73	115.96		12.0263	-110.836	-118.206
2013-08-12 16:09:15	108.84	116.15		12.0332	-110.948	-118.4
2013-08-12 16:19:15	109.29	116.5		12.0402	-111.407	-118.756
2013-08-12 16:29:15	109.58	116.75		12.0471	-111.702	-119.011
2013-08-12 16:39:15	109.84	117.08		12.0541	-111.967	-119.348
2013-08-12 16:49:15	110.17	117.44		12.061	-112.304	-119.715	2013-08-12 16:49:15
2013-08-12 16:59:15	110.44	117.68		12.0679	-112.579	-119.959
2013-08-12 17:09:15	110.7	118.03		12.0749	-112.844	-120.316
2013-08-12 17:19:15	110.95	118.22		12.0818	-113.099	-120.51
2013-08-12 17:29:15	111.24	118.53		12.0888	-113.394	-120.826
2013-08-12 17:39:15	111.51	118.91		12.0957	-113.67	-121.213
2013-08-12 17:49:15	111.86	119.27		12.1027	-114.027	-121.58	2013-08-12 17:49:15
2013-08-12 17:59:15	111.78	118.99		12.1096	-113.945	-121.295
2013-08-12 18:09:15	112.2	119.46		12.1166	-114.373	-121.774
2013-08-12 18:19:15	112.53	119.86		12.1235	-114.709	-122.181
2013-08-12 18:29:15	112.82	120.25		12.1304	-115.005	-122.579
2013-08-12 18:39:15	113.16	120.58		12.1374	-115.352	-122.915
2013-08-12 18:49:15	113.4	120.81		12.1443	-115.596	-123.15	2013-08-12 18:49:15
2013-08-12 18:59:15	113.68	121.14		12.1513	-115.882	-123.486
2013-08-12 19:09:15	113.96	121.32		12.1582	-116.167	-123.67
2013-08-12 19:19:15	114.16	121.64		12.1652	-116.371	-123.996
2013-08-12 19:29:15	114.44	121.92		12.1721	-116.656	-124.281
2013-08-12 19:39:15	114.73	122.26		12.1791	-116.952	-124.628
2013-08-12 19:49:15	115.09	122.62		12.186	-117.319	-124.995	2013-08-12 19:49:15
2013-08-12 19:59:15	115.33	122.91		12.1929	-117.564	-125.291
2013-08-12 20:09:15	115.62	123.18		12.1999	-117.859	-125.566
2013-08-12 20:19:15	115.85	123.5		12.2068	-118.094	-125.892
2013-08-12 20:29:15	116.12	123.82		12.2138	-118.369	-126.218
2013-08-12 20:39:15	116.35	124.02		12.2207	-118.603	-126.422
2013-08-12 20:49:15	116.61	124.43		12.2277	-118.869	-126.84	2013-08-12 20:49:15
2013-08-12 20:59:15	117.01	124.81		12.2346	-119.276	-127.227
2013-08-12 21:09:15	117.27	125.06		12.2416	-119.541	-127.482
2013-08-12 21:19:15	117.54	125.35		12.2485	-119.817	-127.778
2013-08-12 21:29:15	117.79	125.63		12.2554	-120.071	-128.063
2013-08-12 21:39:15	118.05	125.87		12.2624	-120.336	-128.308
2013-08-12 21:49:15	118.26	125.87		12.2693	-120.55	-128.308	2013-08-12 21:49:15
2013-08-12 21:59:15	118.56	126.42		12.2763	-120.856	-128.869
2013-08-12 22:09:15	118.82	126.7		12.2832	-121.121	-129.154
2013-08-12 22:19:15	119.1	126.98		12.2902	-121.407	-129.439
2013-08-12 22:29:15	119.36	127.27		12.2971	-121.672	-129.735
2013-08-12 22:39:15	119.63	127.58		12.3041	-121.947	-130.051
2013-08-12 22:49:15	119.87	127.86		12.311	-122.192	-130.336	2013-08-12 22:49:15
2013-08-12 22:59:15	120.14	128.12		12.3179	-122.467	-130.601
2013-08-12 23:09:15	120.41	128.39		12.3249	-122.742	-130.877
2013-08-12 23:19:15	120.66	128.65		12.3318	-122.997	-131.142
2013-08-12 23:29:15	120.91	128.95		12.3388	-123.252	-131.448
2013-08-12 23:39:15	121.17	129.12		12.3457	-123.517	-131.621
2013-08-12 23:49:15	121.41	129.4		12.3527	-123.761	-131.906	2013-08-12 23:49:15
2013-08-12 23:59:15	121.63	129.67		12.3596	-123.986	-132.181
2013-08-13 00:09:15	121.87	129.99		12.3666	-124.23	-132.508
2013-08-13 00:19:15	122.15	130.14		12.3735	-124.516	-132.661
2013-08-13 00:29:15	122.35	130.47		12.3804	-124.72	-132.997
2013-08-13 00:39:15	122.61	130.8		12.3874	-124.985	-133.333
2013-08-13 00:49:15	122.79	130.99		12.3943	-125.168	-133.527	2013-08-13 00:49:15
2013-08-13 00:59:15	123.09	131.28		12.4013	-125.474	-133.823
2013-08-13 01:09:15	123.33	131.54		12.4082	-125.719	-134.088
2013-08-13 01:19:15	123.59	131.79		12.4152	-125.984	-134.343
2013-08-13 01:29:15	123.82	132.01		12.4221	-126.218	-134.567
2013-08-13 01:39:15	124.03	132.24		12.4291	-126.432	-134.801
2013-08-13 01:49:15	124.29	132.57		12.436	-126.697	-135.138	2013-08-13 01:49:15
2013-08-13 01:59:15	124.51	132.79		12.4429	-126.922	-135.362
2013-08-13 02:09:15	124.76	133.04		12.4499	-127.176	-135.617
2013-08-13 02:19:15	124.99	133.31		12.4568	-127.411	-135.892
2013-08-13 02:29:15	125.2	133.52		12.4638	-127.625	-136.106
2013-08-13 02:39:15	125.45	133.75		12.4707	-127.88	-136.34
2013-08-13 02:49:15	125.66	134		12.4777	-128.094	-136.595	2013-08-13 02:49:15
2013-08-13 02:59:15	125.82	134.26		12.4846	-128.257	-136.86
2013-08-13 03:09:15	126.12	134.47		12.4916	-128.563	-137.074
2013-08-13 03:19:15	126.06	134.67		12.4985	-128.502	-137.278
2013-08-13 03:29:15	126.51	134.93		12.5054	-128.96	-137.543
2013-08-13 03:39:15	126.74	135.21		12.5124	-129.195	-137.829
2013-08-13 03:49:15	126.93	135.41		12.5193	-129.388	-138.033	2013-08-13 03:49:15
2013-08-13 03:59:15	127.17	135.62		12.5263	-129.633	-138.247
2013-08-13 04:09:15	127.41	135.9		12.5332	-129.878	-138.532
2013-08-13 04:19:15	127.63	136.1		12.5402	-130.102	-138.736
2013-08-13 04:29:15	127.84	136.31		12.5471	-130.316	-138.95
2013-08-13 04:39:15	128.05	136.56		12.5541	-130.53	-139.205
2013-08-13 04:49:15	128.27	136.78		12.561	-130.754	-139.429	2013-08-13 04:49:15
2013-08-13 04:59:15	128.43	136.62		12.5679	-130.917	-139.266
2013-08-13 05:09:15	128.67	137.21		12.5749	-131.162	-139.867
2013-08-13 05:19:15	128.86	137.48		12.5818	-131.356	-140.143
2013-08-13 05:29:15	129.08	137.65		12.5888	-131.58	-140.316
2013-08-13 05:39:15	129.28	137.89		12.5957	-131.784	-140.561
2013-08-13 05:49:15	129.49	138.11		12.6027	-131.998	-140.785	2013-08-13 05:49:15
2013-08-13 05:59:15	129.7	138.32		12.6096	-132.212	-140.999
2013-08-13 06:09:15	129.91	138.53		12.6166	-132.426	-141.213
2013-08-13 06:19:15	130.09	138.74		12.6235	-132.61	-141.427
2013-08-13 06:29:15	130.31	138.96		12.6304	-132.834	-141.651
2013-08-13 06:39:15	130.51	139.18		12.6374	-133.038	-141.876
2013-08-13 06:49:15	130.71	139.34		12.6443	-133.242	-142.039	2013-08-13 06:49:15
2013-08-13 06:59:15	130.87	139.6		12.6513	-133.405	-142.304
2013-08-13 07:09:15	131.07	139.77		12.6582	-133.609	-142.477
2013-08-13 07:19:15	131.28	139.97		12.6652	-133.823	-142.681
2013-08-13 07:29:15	131.46	140.18		12.6721	-134.006	-142.895
2013-08-13 07:39:15	131.62	140.35		12.6791	-134.169	-143.068
2013-08-13 07:49:15	131.83	140.54		12.686	-134.383	-143.262	2013-08-13 07:49:15
2013-08-13 07:59:15	132.02	140.74		12.6929	-134.577	-143.466
2013-08-13 08:09:15	131.93	140.2		12.6999	-134.485	-142.915
2013-08-13 08:19:15	132.2	140.84		12.7068	-134.76	-143.568
2013-08-13 08:29:15	132.35	141.07		12.7138	-134.913	-143.802
2013-08-13 08:39:15	132.52	141.22		12.7207	-135.087	-143.955
2013-08-13 08:49:15	132.73	141.46		12.7277	-135.301	-144.2	2013-08-13 08:49:15
2013-08-13 08:59:15	133.01	141.76		12.7346	-135.586	-144.506
2013-08-13 09:09:15	133.2	141.95		12.7416	-135.78	-144.699
2013-08-13 09:19:15	133.38	142.2		12.7485	-135.963	-144.954
2013-08-13 09:29:15	133.54	142.36		12.7554	-136.126	-145.117
2013-08-13 09:39:15	133.7	142.56		12.7624	-136.29	-145.321
2013-08-13 09:49:15	133.87	142.74		12.7693	-136.463	-145.505	2013-08-13 09:49:15
2013-08-13 09:59:15	134.01	142.84		12.7763	-136.606	-145.607
2013-08-13 10:09:15	134.16	142.95		12.7832	-136.758	-145.719
2013-08-13 10:19:15	134.3	143.12		12.7902	-136.901	-145.892
2013-08-13 10:29:15	134.43	143.27		12.7971	-137.034	-146.045
2013-08-13 10:39:15	134.56	143.36		12.8041	-137.166	-146.137
2013-08-13 10:49:15	134.71	143.58		12.811	-137.319	-146.361	2013-08-13 10:49:15
2013-08-13 10:59:15	134.87	143.72		12.8179	-137.482	-146.504
2013-08-13 11:09:15	135	143.87		12.8249	-137.615	-146.656
2013-08-13 11:19:15	135.12	143.99		12.8318	-137.737	-146.779
2013-08-13 11:29:15	135.26	144.13		12.8388	-137.88	-146.922
2013-08-13 11:39:15	135.39	144.31		12.8457	-138.012	-147.105
2013-08-13 11:49:15	135.49	144.39		12.8527	-138.114	-147.187	2013-08-13 11:49:15
2013-08-13 11:59:15	135.69	144.87		12.8596	-138.318	-147.676
2013-08-13 12:09:15	135.87	144.84		12.8666	-138.502	-147.645
2013-08-13 12:19:15	135.98	144.92		12.8735	-138.614	-147.727
2013-08-13 12:29:15	136.09	145.07		12.8804	-138.726	-147.88
2013-08-13 12:39:15	136.27	145.56		12.8874	-138.909	-148.379
2013-08-13 12:49:15	136.38	145.47		12.8943	-139.021	-148.287	2013-08-13 12:49:15
2013-08-13 12:59:15	136.32	145.35		12.9013	-138.96	-148.165
2013-08-13 13:09:15	136.57	145.78		12.9082	-139.215	-148.603
2013-08-13 13:19:15	136.69	145.84		12.9152	-139.337	-148.665
2013-08-13 13:29:15	136.85	145.99		12.9221	-139.501	-148.818
2013-08-13 13:39:15	137.01	146.36		12.9291	-139.664	-149.195
2013-08-13 13:49:15	137.19	146.39		12.936	-139.847	-149.225	2013-08-13 13:49:15
2013-08-13 13:59:15	137.29	146.43		12.9429	-139.949	-149.266
2013-08-13 14:09:15	137.46	146.89		12.9499	-140.122	-149.735
2013-08-13 14:19:15	137.64	146.8		12.9568	-140.306	-149.643
2013-08-13 14:29:15	137.76	147.27		12.9638	-140.428	-150.122
2013-08-13 14:39:15	137.96	147.28		12.9707	-140.632	-150.133
2013-08-13 14:49:15	138.02	147.37		12.9777	-140.693	-150.224	2013-08-13 14:49:15
2013-08-13 14:59:15	138.24	147.63		12.9846	-140.917	-150.489
2013-08-13 15:09:15	138.34	147.6		12.9916	-141.019	-150.459
2013-08-13 15:19:15	138.54	148.06		12.9985	-141.223	-150.928
2013-08-13 15:29:15	138.71	148.05		13.0054	-141.397	-150.917
2013-08-13 15:39:15	138.76	148.18		13.0124	-141.448	-151.05
2013-08-13 15:49:15	138.89	148.35		13.0193	-141.58	-151.223	2013-08-13 15:49:15
2013-08-13 15:59:15	138.99	148.47		13.0263	-141.682	-151.346
2013-08-13 16:09:15	139.13	148.57		13.0332	-141.825	-151.448
2013-08-13 16:19:15	139.23	148.63		13.0402	-141.927	-151.509
2013-08-13 16:29:15	139.36	148.78		13.0471	-142.059	-151.662
2013-08-13 16:39:15	139.46	148.94		13.0541	-142.161	-151.825
2013-08-13 16:49:15	139.55	149.16		13.061	-142.253	-152.049	2013-08-13 16:49:15
2013-08-13 16:59:15	139.78	149.31		13.0679	-142.487	-152.202
2013-08-13 17:09:15	139.85	149.33		13.0749	-142.559	-152.222
2013-08-13 17:19:15	139.93	149.45		13.0818	-142.64	-152.345
2013-08-13 17:29:15	140.18	149.84		13.0888	-142.895	-152.742
2013-08-13 17:49:15	140.45	150.16		13.1027	-143.17	-153.068
2013-08-13 17:59:15	140.54	150.06		13.1096	-143.262	-152.966	2013-08-13 17:59:15
2013-08-13 18:09:15	140.63	150.21		13.1166	-143.354	-153.119
2013-08-13 18:19:15	140.87	150.58		13.1235	-143.598	-153.496
2013-08-13 18:29:15	140.95	150.45		13.1304	-143.68	-153.364
2013-08-13 18:39:15	141.02	150.57		13.1374	-143.751	-153.486
2013-08-13 18:49:15	141.14	150.66		13.1443	-143.874	-153.578
2013-08-13 18:59:15	141.26	150.78		13.1513	-143.996	-153.7	2013-08-13 18:59:15
2013-08-13 19:09:15	141.34	150.92		13.1582	-144.077	-153.843
2013-08-13 19:19:15	141.49	151.1		13.1652	-144.23	-154.027
2013-08-13 19:29:15	141.56	151.11		13.1721	-144.302	-154.037
2013-08-13 19:39:15	141.62	151.18		13.1791	-144.363	-154.108
2013-08-13 19:59:15	141.93	151.54		13.1929	-144.679	-154.475
2013-08-13 20:09:15	142.03	151.58		13.1999	-144.781	-154.516	2013-08-13 20:09:15
2013-08-13 20:19:15	142.07	151.63		13.2068	-144.822	-154.567
2013-08-13 20:29:15	142.17	151.81		13.2138	-144.924	-154.75
2013-08-13 20:39:15	142.31	151.96		13.2207	-145.066	-154.903
2013-08-13 20:49:15	142.43	152.06		13.2277	-145.189	-155.005
2013-08-13 20:59:15	142.52	152.19		13.2346	-145.28	-155.138
2013-08-13 21:09:15	142.65	152.35		13.2416	-145.413	-155.301	2013-08-13 21:09:15
2013-08-13 21:19:15	142.76	152.47		13.2485	-145.525	-155.423
2013-08-13 21:29:15	142.88	152.63		13.2554	-145.647	-155.586
2013-08-13 21:39:15	143.01	152.78		13.2624	-145.78	-155.739
2013-08-13 21:49:15	143.1	152.87		13.2693	-145.872	-155.831
2013-08-13 21:59:15	143.23	153.01		13.2763	-146.004	-155.973
2013-08-13 22:09:15	143.33	153.13		13.2832	-146.106	-156.096	2013-08-13 22:09:15
2013-08-13 22:19:15	143.46	153.24		13.2902	-146.239	-156.208
2013-08-13 22:29:15	143.58	153.39		13.2971	-146.361	-156.361
2013-08-13 22:39:15	143.67	153.51		13.3041	-146.453	-156.483
2013-08-13 22:49:15	143.8	153.62		13.311	-146.585	-156.595
2013-08-13 22:59:15	143.91	153.71		13.3179	-146.697	-156.687
2013-08-13 23:09:15	144.02	153.87		13.3249	-146.809	-156.85	2013-08-13 23:09:15
2013-08-13 23:19:15	144.12	154.05		13.3318	-146.911	-157.034
2013-08-13 23:29:15	144.25	154.12		13.3388	-147.044	-157.105
2013-08-13 23:39:15	144.36	154.24		13.3457	-147.156	-157.227
2013-08-13 23:49:15	144.45	154.36		13.3527	-147.248	-157.35
2013-08-13 23:59:15	144.71	154.57		13.3596	-147.513	-157.564
2013-08-14 00:09:15	144.67	154.59		13.3666	-147.472	-157.584	2013-08-14 00:09:15
2013-08-14 00:19:15	144.78	154.67		13.3735	-147.584	-157.666
2013-08-14 00:29:15	144.88	154.78		13.3804	-147.686	-157.778
2013-08-14 00:39:15	145	154.87		13.3874	-147.808	-157.87
2013-08-14 00:49:15	145.25	155.18		13.3943	-148.063	-158.186
2013-08-14 01:09:15	145.45	155.42		13.4082	-148.267	-158.43
2013-08-14 01:19:15	145.54	155.52		13.4152	-148.359	-158.532	2013-08-14 01:19:15
2013-08-14 01:29:15	145.66	155.66		13.4221	-148.481	-158.675
2013-08-14 01:39:15	145.77	155.7		13.4291	-148.593	-158.716
2013-08-14 01:49:15	145.83	155.82		13.436	-148.654	-158.838
2013-08-14 01:59:15	145.97	155.89		13.4429	-148.797	-158.909
2013-08-14 02:09:15	146.06	156.04		13.4499	-148.889	-159.062
2013-08-14 02:19:15	146.17	156.14		13.4568	-149.001	-159.164	2013-08-14 02:19:15
2013-08-14 02:29:15	146.28	156.24		13.4638	-149.113	-159.266
2013-08-14 02:39:15	146.34	156.36		13.4707	-149.174	-159.388
2013-08-14 02:49:15	146.46	156.43		13.4777	-149.297	-159.46
2013-08-14 02:59:15	146.54	156.53		13.4846	-149.378	-159.562
2013-08-14 03:09:15	146.63	156.6		13.4916	-149.47	-159.633
2013-08-14 03:19:15	146.74	156.74		13.4985	-149.582	-159.776	2013-08-14 03:19:15
2013-08-14 03:29:15	146.83	156.8		13.5054	-149.674	-159.837
2013-08-14 03:39:15	146.94	156.93		13.5124	-149.786	-159.969
2013-08-14 03:49:15	146.97	156.96		13.5193	-149.817	-160
2013-08-14 03:59:15	147.11	157.08		13.5263	-149.959	-160.122
2013-08-14 04:09:15	147.23	157.21		13.5332	-150.082	-160.255
2013-08-14 04:19:15	147.31	157.34		13.5402	-150.163	-160.387	2013-08-14 04:19:15
2013-08-14 04:29:15	147.4	157.4		13.5471	-150.255	-160.449
2013-08-14 04:39:15	147.51	157.53		13.5541	-150.367	-160.581
2013-08-14 04:49:15	147.59	157.62		13.561	-150.449	-160.673
2013-08-14 04:59:15	147.69	157.66		13.5679	-150.55	-160.714
2013-08-14 05:09:15	147.78	157.73		13.5749	-150.642	-160.785
2013-08-14 05:19:15	147.87	157.87		13.5818	-150.734	-160.928	2013-08-14 05:19:15
2013-08-14 05:29:15	147.96	157.97		13.5888	-150.826	-161.03
2013-08-14 05:39:15	148.05	158.06		13.5957	-150.917	-161.121
2013-08-14 05:49:15	148.15	158.16		13.6027	-151.019	-161.223
2013-08-14 05:59:15	148.24	158.29		13.6096	-151.111	-161.356
2013-08-14 06:09:15	148.33	158.38		13.6166	-151.203	-161.448
2013-08-14 06:19:15	148.42	158.41		13.6235	-151.295	-161.478	2013-08-14 06:19:15
2013-08-14 06:29:15	148.5	158.56		13.6304	-151.376	-161.631
2013-08-14 06:39:15	148.6	158.62		13.6374	-151.478	-161.692
2013-08-14 06:49:15	148.62	158.68		13.6443	-151.498	-161.753
2013-08-14 06:59:15	148.74	158.85		13.6513	-151.621	-161.927
2013-08-14 07:09:15	148.86	158.96		13.6582	-151.743	-162.039
2013-08-14 07:19:15	148.95	159.01		13.6652	-151.835	-162.09	2013-08-14 07:19:15
2013-08-14 07:29:15	149.02	159.09		13.6721	-151.906	-162.171
2013-08-14 07:39:15	149.11	159.19		13.6791	-151.998	-162.273
2013-08-14 07:49:15	149.2	159.29		13.686	-152.09	-162.375
2013-08-14 07:59:15	148.96	158.89		13.6929	-151.845	-161.967
2013-08-14 08:19:15	149.18	159.24		13.7068	-152.069	-162.324
2013-08-14 08:29:15	149.25	159.32		13.7138	-152.141	-162.406	2013-08-14 08:29:15
2013-08-14 08:39:15	149.35	159.42		13.7207	-152.243	-162.508
2013-08-14 08:49:15	149.42	159.45		13.7277	-152.314	-162.538
2013-08-14 08:59:15	149.48	159.59		13.7346	-152.375	-162.681
2013-08-14 09:09:15	149.56	159.63		13.7416	-152.457	-162.722
2013-08-14 09:19:15	149.64	159.71		13.7485	-152.538	-162.803
2013-08-14 09:29:15	149.68	159.81		13.7554	-152.579	-162.905	2013-08-14 09:29:15
2013-08-14 09:39:15	149.77	159.84		13.7624	-152.671	-162.936
2013-08-14 09:49:15	150	160.04		13.7693	-152.905	-163.14
2013-08-14 09:59:15	150.06	160.15		13.7763	-152.966	-163.252
2013-08-14 10:09:15	150.15	160.23		13.7832	-153.058	-163.333
2013-08-14 10:19:15	150.21	160.25		13.7902	-153.119	-163.354
2013-08-14 10:29:15	150.28	160.31		13.7971	-153.191	-163.415	2013-08-14 10:29:15
2013-08-14 10:39:15	150.36	160.41		13.8041	-153.272	-163.517
2013-08-14 10:49:15	150.38	160.36		13.811	-153.293	-163.466
2013-08-14 10:59:15	150.49	160.45		13.8179	-153.405	-163.558
2013-08-14 11:09:15	150.56	160.51		13.8249	-153.476	-163.619
2013-08-14 11:19:15	150.66	160.56		13.8318	-153.578	-163.67
2013-08-14 11:29:15	150.71	160.58		13.8388	-153.629	-163.69	2013-08-14 11:29:15
2013-08-14 11:39:15	150.73	160.68		13.8457	-153.649	-163.792
2013-08-14 11:49:15	150.83	160.67		13.8527	-153.751	-163.782
2013-08-14 11:59:15	150.88	160.75		13.8596	-153.802	-163.863
2013-08-14 12:09:15	150.92	160.79		13.8666	-153.843	-163.904
2013-08-14 12:19:15	151.01	160.88		13.8735	-153.935	-163.996
2013-08-14 12:29:15	151.07	160.95		13.8804	-153.996	-164.067	2013-08-14 12:29:15
2013-08-14 12:39:15	150.94	160.81		13.8874	-153.863	-163.925
2013-08-14 12:49:15	151.02	160.81		13.8943	-153.945	-163.925
2013-08-14 12:59:15	151.08	160.84		13.9013	-154.006	-163.955
2013-08-14 13:09:15	151.14	160.9		13.9082	-154.067	-164.016
2013-08-14 13:19:15	151.22	161.01		13.9152	-154.149	-164.128
2013-08-14 13:29:15	151.25	161.05		13.9221	-154.179	-164.169	2013-08-14 13:29:15
2013-08-14 13:39:15	151.29	161.12		13.9291	-154.22	-164.241
2013-08-14 13:49:15	151.34	161.08		13.936	-154.271	-164.2
2013-08-14 13:59:15	151.42	161.2		13.9429	-154.353	-164.322
2013-08-14 14:09:15	151.59	161.63		13.9499	-154.526	-164.76
2013-08-14 14:19:15	151.81	161.72		13.9568	-154.75	-164.852
2013-08-14 14:29:15	151.82	161.55		13.9638	-154.76	-164.679	2013-08-14 14:29:15
2013-08-14 14:39:15	151.85	161.82		13.9707	-154.791	-164.954
2013-08-14 14:49:15	152.03	161.87		13.9777	-154.975	-165.005
2013-08-14 14:59:15	152.06	161.72		13.9846	-155.005	-164.852
2013-08-14 15:09:15	152.14	162.3		13.9916	-155.087	-165.443
2013-08-14 15:19:15	152.27	162.05		13.9985	-155.219	-165.189
2013-08-14 15:29:15	152.28	161.99		14.0054	-155.229	-165.127	2013-08-14 15:29:15
[truncated: 2,531 more rows]

## Sheet: Tensi
Zeit [d]	MP bot(2) [cm]	MP top(1) [cm]		air entry bot		AE time	AE [cm]	Type	Pos	Weight
0.00405093	-2.44648	-4.89297		2013-08-22 21:19:00	8800	22.2483	-8970.44	1	2	1
0.00543981	-1.9368	-4.48522
0.0471065	-2.17125	-4.63812		air entry top
0.0887731	-2.263	-4.72987		Time					Pos	Weight
0.13044	-2.38532	-4.86239		2013-08-19 03:49:15	8800				1	1
0.172106	-2.47706	-4.96432
0.213773	-2.51784	-4.9949
0.25544	-2.579	-5.06626
0.297106	-2.65036	-5.13761
0.338773	-2.79307	-5.27013
0.38044	-2.89501	-5.35168
0.422106	-3.01733	-5.47401
0.463773	-3.11927	-5.60652
0.50544	-3.2212	-5.69827
0.547106	-3.32314	-5.8002
0.588773	-3.43527	-5.91233
0.63044	-3.48624	-5.9633
0.679051	-3.40469	-5.87156
0.720718	-3.56779	-6.04485
0.762384	-3.7105	-6.18756
0.81794	-3.77166	-6.25892
0.866551	-3.81244	-6.2895
0.908218	-3.95515	-6.43221
0.949884	-4.04689	-6.52396
0.991551	-4.13863	-6.6055
1.03322	-4.24057	-6.71764
1.07488	-4.3527	-6.83996
1.11655	-4.44444	-6.92151
1.15822	-4.53619	-7.01325
1.19988	-4.66871	-7.14577
1.2485	-4.69929	-7.17635
1.29016	-4.842	-7.30887
1.33183	-4.92355	-7.40061
1.3735	-4.98471	-7.46177
1.42211	-5.04587	-7.52294
1.47072	-5.05607	-7.51274
1.51238	-5.11723	-7.59429
1.55405	-5.17839	-7.65545
1.59572	-5.22936	-7.69623
1.63738	-5.30071	-7.78797
1.67905	-5.34149	-7.81855
1.72072	-5.3211	-7.81855
1.76238	-5.50459	-7.96126
1.80405	-5.54536	-8.02243
1.84572	-5.6473	-8.12436
1.89433	-5.66769	-8.13456
1.936	-5.82059	-8.30785
1.97766	-5.82059	-8.30785
2.01933	-5.91233	-8.39959
2.061	-6.04485	-8.51172
2.11655	-6.16718	-8.65443
2.15822	-6.21814	-8.7054
2.19988	-6.37105	-8.82773
2.24155	-6.4526	-8.91947
2.28322	-6.58512	-9.04179
2.32488	-6.6055	-9.07238
2.36655	-6.68705	-9.14373
2.40822	-6.75841	-9.23547
2.44988	-6.81957	-9.29664
2.49155	-6.88073	-9.3578
2.53322	-6.9419	-9.42915
2.57488	-6.99286	-9.49032
2.6235	-7.06422	-9.55148
2.66516	-6.99286	-9.5107
2.72072	-7.23751	-9.73496
2.76238	-7.29867	-9.80632
2.80405	-7.37003	-9.87768
2.84572	-7.46177	-9.95923
2.88738	-7.53313	-10.0408
2.92905	-7.60449	-10.1019
2.97072	-7.69623	-10.2141
3.01238	-7.71662	-10.2345
3.05405	-7.75739	-10.2752
3.09572	-7.84913	-10.3874
3.14433	-7.93068	-10.4587
3.186	-7.99185	-10.4893
3.22766	-8.04281	-10.5607
3.27627	-8.13456	-10.6422
3.31794	-8.19572	-10.7136
3.35961	-8.25688	-10.7849
3.40127	-8.31804	-10.8461
3.44294	-8.36901	-10.897
3.48461	-8.40979	-10.9582
3.52627	-8.48114	-11.0194
3.56794	-8.5525	-11.1009
3.60961	-8.60347	-11.1519
3.65127	-8.66463	-11.2232
3.69294	-8.73598	-11.264
3.73461	-8.78695	-11.3456
3.77627	-8.83792	-11.3863
3.81794	-8.84811	-11.4067
3.85961	-8.91947	-11.4781
3.90127	-8.98063	-11.5494
3.94294	-9.05199	-11.6106
3.98461	-9.14373	-11.7125
4.02627	-9.21509	-11.7941
4.06794	-9.24567	-11.8145
4.11655	-9.32722	-11.9062
4.15822	-9.42915	-11.998
4.19988	-9.5107	-12.0897
4.2485	-9.38838	-11.9878
4.29016	-9.5209	-12.1305
4.33183	-9.61264	-12.2018
4.3735	-9.69419	-12.2936
4.41516	-9.75535	-12.3547
4.45683	-9.81651	-12.4159
4.4985	-9.88787	-12.4975
4.54711	-9.96942	-12.579
4.60266	-10.0815	-12.6707
4.64433	-10.1427	-12.7523
4.686	-10.2243	-12.8338
4.73461	-10.3364	-12.9562
4.77627	-10.4281	-13.0479
4.81794	-10.5097	-13.1397
4.85961	-10.581	-13.2008
4.90822	-10.6728	-13.2926
4.94988	-10.7645	-13.3843
4.99155	-10.8563	-13.4862
5.03322	-10.9582	-13.578
5.07488	-11.0601	-13.7003
5.11655	-11.1621	-13.8022
5.16516	-11.2946	-13.9246
5.20683	-11.3965	-14.0367
5.2485	-11.3761	-14.0163
5.29016	-11.4985	-14.1284
5.33183	-11.5902	-14.21
5.3735	-11.6514	-14.2915
5.41516	-11.7329	-14.3731
5.45683	-11.7839	-14.4343
5.4985	-11.8451	-14.4954
5.54016	-11.9062	-14.5464
5.58183	-11.9878	-14.6279
5.6235	-12.0387	-14.6789
5.66516	-11.9164	-14.5872
5.71377	-12.1611	-14.8012
5.75544	-12.2222	-14.8624
5.80405	-12.2834	-14.9337
5.85266	-12.3547	-15.0153
5.89433	-12.2528	-14.9337
5.936	-12.4873	-15.1376
5.97766	-12.5994	-15.2803
6.01933	-12.7217	-15.3925
6.061	-12.8542	-15.5352
6.10266	-12.9766	-15.6473
6.14433	-13.0581	-15.7594
6.186	-13.1702	-15.8512
6.22766	-13.2926	-15.9735
6.26933	-13.3843	-16.055
6.311	-13.4557	-16.1264
6.35266	-13.476	-16.1672
6.39433	-13.5474	-16.2385
6.436	-13.6188	-16.2997
6.47766	-13.6901	-16.3609
6.51933	-13.7513	-16.4526
6.561	-13.8226	-16.5138
6.60266	-13.9042	-16.5851
6.64433	-13.9755	-16.6769
6.686	-14.0571	-16.7482
6.72766	-14.0775	-16.7584
6.76933	-14.21	-16.8909
6.811	-14.3017	-16.9725
6.85266	-14.4037	-17.0948
6.89433	-14.4852	-17.1662
6.936	-14.5566	-17.2375
6.97766	-14.6483	-17.3191
7.01933	-14.6687	-17.3394
7.061	-14.7503	-17.4312
7.10266	-14.8318	-17.5229
7.14433	-14.9134	-17.5841
7.186	-15.0255	-17.7064
7.22766	-15.107	-17.7778
7.26933	-15.1886	-17.8593
7.311	-15.2803	-17.9613
7.35266	-15.2905	-17.9918
7.39433	-15.3721	-18.0836
7.436	-15.474	-18.1549
7.47766	-15.5556	-18.2161
7.51933	-15.6065	-18.2977
7.561	-15.6881	-18.369
7.60266	-15.7696	-18.4709
7.64433	-15.8512	-18.5321
7.686	-15.9327	-18.6137
7.72766	-16.055	-18.7462
7.76933	-16.1468	-18.8277
7.811	-16.2181	-18.9602
7.85266	-16.2895	-19.0112
7.89433	-16.3812	-19.1131
7.936	-16.4832	-19.2151
7.97766	-16.5851	-19.3068
8.01933	-16.6871	-19.4088
8.061	-16.7992	-19.5311
8.10266	-16.9113	-19.633
8.14433	-17.0336	-19.7554
8.186	-17.156	-19.8981
8.22766	-17.3191	-20.051
8.26933	-17.4618	-20.2141
8.311	-17.5943	-20.3262
8.35266	-17.7268	-20.4485
8.39433	-17.8491	-20.5912
8.436	-17.9511	-20.6932
8.47766	-18.0938	-20.8563
8.51933	-18.2773	-21.0194
8.56794	-18.4608	-21.2232
8.60961	-18.634	-21.4067
8.65127	-18.8277	-21.5902
8.69294	-18.9806	-21.7227
8.73461	-19.1437	-21.9266
8.77627	-19.3884	-22.1611
8.81794	-19.5923	-22.3751
8.85961	-19.7757	-22.5688
8.90127	-19.9898	-22.7625
8.94294	-20.1529	-22.9867
8.98461	-20.4281	-23.2518
9.02627	-20.6626	-23.5168
9.06794	-20.948	-23.8022
9.10961	-21.2946	-24.1488
9.15127	-21.5596	-24.4343
9.19294	-21.9062	-24.7706
9.23461	-22.1611	-24.9847
9.27627	-22.4567	-25.3007
9.32488	-22.8338	-25.6677
9.36655	-23.1397	-26.0143
9.40822	-23.4557	-26.2997
9.44988	-23.7717	-26.6463
9.49155	-24.1284	-26.9929
9.53322	-24.4954	-27.3802
9.57488	-24.8828	-27.7472
9.61655	-25.2701	-28.1651
9.65822	-25.6881	-28.6035
9.69988	-26.1366	-29.0214
9.74155	-26.5647	-29.5005
9.78322	-27.0133	-29.949
9.82488	-27.4924	-30.4791
9.86655	-27.9817	-30.9582
9.90822	-28.5015	-31.4679
9.94988	-29.001	-31.9674
9.99155	-29.5821	-32.5892
10.0332	-30.1121	-33.1091
10.0818	-30.8869	-33.945
10.1235	-31.5698	-34.6381
10.1652	-32.314	-35.423
10.2068	-33.0377	-36.1774
10.2485	-33.7717	-36.8909
10.2902	-34.5362	-37.6555
10.3318	-35.2803	-38.42
10.3735	-36.0652	-39.2457
10.4152	-36.9521	-40.1325
10.4568	-37.9103	-41.1825
10.4985	-38.9602	-42.1916
10.5402	-40.0306	-43.3741
10.5818	-41.2232	-44.5464
10.6304	-42.7727	-46.106
10.6721	-44.1182	-47.5025
10.7138	-45.5556	-48.9806
10.7554	-47.0642	-50.5403
10.7971	-48.6952	-52.1713
10.8388	-50.2345	-53.8634
10.8804	-51.998	-55.6779
10.9221	-53.8634	-57.6147
10.9638	-55.8002	-59.6636
11.0054	-57.8186	-61.8145
11.0471	-59.8879	-64.0163
11.0888	-62.3649	-66.5647
11.1304	-64.8216	-69.052
11.1721	-67.3496	-71.6514
11.2138	-69.7655	-74.1284
11.2554	-72.5076	-77.0133
11.3041	-75.6473	-80.3568
11.3457	-78.2773	-82.844
11.3874	-80.8053	-85.5556
11.4291	-83.2722	-88.104
11.4707	-85.5046	-90.5199
11.5124	-87.8389	-92.9358
11.5541	-90.0306	-95.1988
11.6027	-92.4159	-97.8491
11.6443	-94.4241	-99.8981
11.686	-96.2385	-101.957
11.7277	-97.9817	-103.904
11.7693	-99.7757	-105.729
11.811	-101.692	-107.92
11.8527	-103.445	-109.908
11.8943	-104.862	-111.56
11.936	-106.871	-113.884
11.9777	-108.756	-115.872
12.0193	-110.469	-117.717
12.061	-112.304	-119.715
12.1027	-114.027	-121.58
12.1443	-115.596	-123.15
12.186	-117.319	-124.995
12.2277	-118.869	-126.84
12.2693	-120.55	-128.308
12.311	-122.192	-130.336
12.3527	-123.761	-131.906
12.3943	-125.168	-133.527
12.436	-126.697	-135.138
12.4777	-128.094	-136.595
12.5193	-129.388	-138.033
12.561	-130.754	-139.429
12.6027	-131.998	-140.785
12.6443	-133.242	-142.039
12.686	-134.383	-143.262
12.7277	-135.301	-144.2
12.7693	-136.463	-145.505
12.811	-137.319	-146.361
12.8527	-138.114	-147.187
12.8943	-139.021	-148.287
12.936	-139.847	-149.225
12.9777	-140.693	-150.224
13.0193	-141.58	-151.223
13.061	-142.253	-152.049
13.1096	-143.262	-152.966
13.1513	-143.996	-153.7
13.1999	-144.781	-154.516
13.2416	-145.413	-155.301
13.2832	-146.106	-156.096
13.3249	-146.809	-156.85
13.3666	-147.472	-157.584
13.4152	-148.359	-158.532
13.4568	-149.001	-159.164
13.4985	-149.582	-159.776
13.5402	-150.163	-160.387
13.5818	-150.734	-160.928
13.6235	-151.295	-161.478
13.6652	-151.835	-162.09
13.7138	-152.141	-162.406
13.7554	-152.579	-162.905
13.7971	-153.191	-163.415
13.8388	-153.629	-163.69
13.8804	-153.996	-164.067
13.9221	-154.179	-164.169
13.9638	-154.76	-164.679
14.0054	-155.229	-165.127
14.0471	-155.586	-165.484
14.0888	-156.075	-165.984
14.1304	-156.188	-166.412
14.1721	-156.636	-167.156
14.2138	-157.064	-166.983
14.2554	-157.503	-167.482
14.2971	-157.971	-167.951
14.3388	-158.298	-168.665
14.3804	-158.828	-169.49
14.4221	-159.317	-170.296
14.4638	-159.766	-170.815
14.5054	-160.204	-171.366
14.5471	-160.652	-171.978
14.5888	-161.06	-172.528
14.6304	-161.529	-173.323
14.6721	-161.937	-173.976
14.7138	-162.304	-174.434
14.7554	-162.457	-174.302
14.7971	-162.742	-175.291
14.8388	-162.844	-175.178
14.8874	-163.333	-175.861
14.9291	-163.721	-176.514
14.9707	-164.088	-177.727
15.0124	-164.506	-178.257
15.0541	-164.638	-179.664
15.0957	-165.087	-179.582
15.1374	-165.494	-181.692
15.1791	-165.739	-181.916
15.2207	-166.035	-182.813
15.2624	-166.381	-183.894
15.3041	-166.595	-184.975
15.3457	-166.922	-185.79
15.3874	-167.38	-187.36
15.4291	-167.696	-188.695
15.4707	-167.961	-189.949
15.5124	-168.298	-191.621
15.5541	-168.624	-193.68
15.5957	-168.94	-195.607
15.6374	-169.297	-197.839
15.6791	-169.45	-197.655
15.7207	-169.735	-201.264
15.7624	-169.837	-203.405
15.8041	-170.275	-207.288
15.8457	-170.632	-212.905
15.8874	-170.897	-214.985
15.9291	-171.264	-220.082
15.9707	-171.448	-230.887
16.0124	-171.804	-241.315
16.0541	-171.998	-254.679
16.0957	-172.314	-277.645
16.1374	-172.661	-307.36
16.1791	-173.068	-374.526
16.2207	-173.456	-475.933
16.2624	-173.67	-618.124
16.3041	-174.139	-963.435
16.3179	-173.996	-1033.18
16.3457	-174.281
16.3874	-174.444
16.4291	-174.75
16.4707	-175.087
16.5124	-175.474
16.5541	-175.861
16.5957	-176.086
16.6374	-176.34
16.6791	-176.636
16.7207	-176.983
16.7624	-177.146
16.8041	-177.441
16.8457	-178.104
16.8874	-178.379
16.9291	-178.94
16.9707	-179.327
17.0124	-178.919
17.0541	-179.501
17.1027	-180.316
17.1443	-180.775
17.186	-181.03
17.2277	-181.305
17.2693	-181.998
17.311	-182.294
17.3527	-182.446
17.4013	-183.017
17.4429	-183.884
17.4846	-183.904
17.5263	-184.495
17.5679	-184.975
17.6096	-185.566
17.6513	-186.249
17.6929	-186.769
17.7346	-187.085
17.7763	-188.104
17.8179	-188.532
17.8666	-189.348
17.9082	-189.908
17.9499	-191.06
17.9916	-191.774
18.0402	-192.538
18.0818	-192.956
18.1235	-194.088
18.1652	-194.995
18.2068	-195.586
18.2485	-197.105
18.2902	-197.401
18.3318	-199.042
18.3735	-199.633
18.4152	-200.724
18.4568	-201.845
18.4985	-203.231
18.5471	-205.454
18.5888	-206.442
18.6304	-208.043
18.6721	-209.48
18.7138	-210.52
18.7554	-212.834
18.7971	-214.913
18.8388	-217.309
18.8804	-219.378
18.9221	-221.713
18.9638	-223.425
19.0054	-224.292
19.0541	-228.196
19.0957	-231.753
19.1374	-235.484
19.1791	-237.92
19.2207	-241.814
19.2624	-244.098
19.311	-249.205
19.3527	-254.832
19.3943	-260.336
19.436	-265.688
19.4777	-274.077
19.5193	-281.753
19.561	-290.245
19.6027	-300.418
19.6443	-311.152
19.686	-319.908
19.7277	-331.784
19.7693	-345.912
19.811	-367.829
19.8527	-385.535
19.8943	-415.25
19.936	-455.474
19.9777	-495.301
20.0193	-544.638
20.061	-618.063
20.1027	-742.457
20.1443	-807.574
20.1929	-969.521

## Sheet: HYDRUS
Data für die Zielfunktion: 2 x Tensionen, 1 x Endwassergehalt					22.2483	Verdunstungsrate
Time	Obs	Type	Pos	Weight		Zeitintervall		Evarate [cm/d]			Type	1-Tension	2-Wassergehalt
0.00405093	-2.44648	1	2	1		0.673772	0	0.221557			Pos	1-top	2-bot	(von oben nach unten)
0.00543981	-1.9368	1	2	1		1.2027	0	0.249506			60	Time-Variable boundary conditions+
0.0471065	-2.17125	1	2	1		1.71677	0	0.20762			22.249	Final Time	Time Information
0.0887731	-2.263	1	2	1		1.88754	0	0.201295			930	Inverse data points
0.13044	-2.38532	1	2	1		2.18258	0	0.294939			-5.67177	BC-top	[hPa]
0.172106	-2.47706	1	2	1		2.65523	0	0.22683			-4.42177	tens_top_ini	[hPa]	1
0.213773	-2.51784	1	2	1		2.9913	0	0.211011			-1.96429	tens_bot_ini	[hPa]	2
0.25544	-2.579	1	2	1		3.23621	0	0.216917			-0.714286	BC-bot	[hPa]
0.297106	-2.65036	1	2	1		3.78558	0	0.171523
0.338773	-2.79307	1	2	1		4.20279	0	0.199933
0.38044	-2.89501	1	2	1		4.72096	0	0.186029
0.422106	-3.01733	1	2	1		4.92094	0	0.200744
0.463773	-3.11927	1	2	1		5.22481	0	0.242064
0.50544	-3.2212	1	2	1		5.66322	0	0.183138
0.547106	-3.32314	1	2	1		5.8942	0	0.169635
0.588773	-3.43527	1	2	1		6.12227	0	0.238203
0.63044	-3.48624	1	2	1		6.70104	0	0.181086
0.679051	-3.40469	1	2	1		6.90961	0	0.168273
0.720718	-3.56779	1	2	1		7.16829	0	0.164483
0.762384	-3.7105	1	2	1		7.7119	0	0.145926
0.81794	-3.77166	1	2	1		8.18705	0	0.158855
0.866551	-3.81244	1	2	1		8.75216	0	0.188444
0.908218	-3.95515	1	2	1		8.9142	0	0.200272
0.949884	-4.04689	1	2	1		9.13169	0	0.236527
0.991551	-4.13863	1	2	1		9.7512	0	0.224664
1.03322	-4.24057	1	2	1		10.0952	0	0.21455
1.07488	-4.3527	1	2	1		10.5835	0	0.221504
1.11655	-4.44444	1	2	1		11.2102	0	0.226314
1.15822	-4.53619	1	2	1		11.7161	0	0.20576
1.19988	-4.66871	1	2	1		11.8931	0	0.177875
1.2485	-4.69929	1	2	1		12.1089	0	0.16711
1.29016	-4.842	1	2	1		12.698	0	0.162798
1.33183	-4.92355	1	2	1		12.8981	0	0.150168
1.3735	-4.98471	1	2	1		13.187	0	0.144798
1.42211	-5.04587	1	2	1		13.6892	0	0.127812
1.47072	-5.05607	1	2	1		13.8815	0	0.112486
1.51238	-5.11723	1	2	1		14.1095	0	0.109666
1.55405	-5.17839	1	2	1		14.1233	0	0.103991
1.59572	-5.22936	1	2	1		14.8247	0	0.101113
1.63738	-5.30071	1	2	1		15.0489	0	0.0814691
1.67905	-5.34149	1	2	1		15.1633	0	0.0903311
1.72072	-5.3211	1	2	1		15.7339	0	0.0796265
1.76238	-5.50459	1	2	1		15.8868	0	0.0738789
1.80405	-5.54536	1	2	1		16.1668	0	0.077264
1.84572	-5.6473	1	2	1		16.7516	0	0.0723477
1.89433	-5.66769	1	2	1		16.9732	0	0.0639984
1.936	-5.82059	1	2	1		17.1675	0	0.0618809
1.97766	-5.82059	1	2	1		17.7448	0	0.0578747
2.01933	-5.91233	1	2	1		18.1885	0	0.0563478
2.061	-6.04485	1	2	1		18.7031	0	0.0523169
2.11655	-6.16718	1	2	1		19.0006	0	0.0484799
2.15822	-6.21814	1	2	1		19.2837	0	0.0509549
2.19988	-6.37105	1	2	1		19.6796	0	0.052817
2.24155	-6.4526	1	2	1		20.1555	0	0.0525308
2.28322	-6.58512	1	2	1		20.6913	0	0.0547348
2.32488	-6.6055	1	2	1		21.2159	0	0.0485793
2.36655	-6.68705	1	2	1		21.7168	0	0.0407873
2.40822	-6.75841	1	2	1		21.9648	0	0.0377983
2.44988	-6.81957	1	2	1		22.091	0	0.0381113
2.49155	-6.88073	1	2	1		22.249	0	0.0278332
2.53322	-6.9419	1	2	1
2.57488	-6.99286	1	2	1
2.6235	-7.06422	1	2	1
2.66516	-6.99286	1	2	1
2.72072	-7.23751	1	2	1
2.76238	-7.29867	1	2	1
2.80405	-7.37003	1	2	1
2.84572	-7.46177	1	2	1
2.88738	-7.53313	1	2	1
2.92905	-7.60449	1	2	1
2.97072	-7.69623	1	2	1
3.01238	-7.71662	1	2	1
3.05405	-7.75739	1	2	1
3.09572	-7.84913	1	2	1
3.14433	-7.93068	1	2	1
3.186	-7.99185	1	2	1
3.22766	-8.04281	1	2	1
3.27627	-8.13456	1	2	1
3.31794	-8.19572	1	2	1
3.35961	-8.25688	1	2	1
3.40127	-8.31804	1	2	1
3.44294	-8.36901	1	2	1
3.48461	-8.40979	1	2	1
3.52627	-8.48114	1	2	1
3.56794	-8.5525	1	2	1
3.60961	-8.60347	1	2	1
3.65127	-8.66463	1	2	1
3.69294	-8.73598	1	2	1
3.73461	-8.78695	1	2	1
3.77627	-8.83792	1	2	1
3.81794	-8.84811	1	2	1
3.85961	-8.91947	1	2	1
3.90127	-8.98063	1	2	1
3.94294	-9.05199	1	2	1
3.98461	-9.14373	1	2	1
4.02627	-9.21509	1	2	1
4.06794	-9.24567	1	2	1
4.11655	-9.32722	1	2	1
4.15822	-9.42915	1	2	1
4.19988	-9.5107	1	2	1
4.2485	-9.38838	1	2	1
4.29016	-9.5209	1	2	1
4.33183	-9.61264	1	2	1
4.3735	-9.69419	1	2	1
4.41516	-9.75535	1	2	1
4.45683	-9.81651	1	2	1
4.4985	-9.88787	1	2	1
4.54711	-9.96942	1	2	1
4.60266	-10.0815	1	2	1
4.64433	-10.1427	1	2	1
4.686	-10.2243	1	2	1
4.73461	-10.3364	1	2	1
4.77627	-10.4281	1	2	1
4.81794	-10.5097	1	2	1
4.85961	-10.581	1	2	1
4.90822	-10.6728	1	2	1
4.94988	-10.7645	1	2	1
4.99155	-10.8563	1	2	1
5.03322	-10.9582	1	2	1
5.07488	-11.0601	1	2	1
5.11655	-11.1621	1	2	1
5.16516	-11.2946	1	2	1
5.20683	-11.3965	1	2	1
5.2485	-11.3761	1	2	1
5.29016	-11.4985	1	2	1
5.33183	-11.5902	1	2	1
5.3735	-11.6514	1	2	1
5.41516	-11.7329	1	2	1
5.45683	-11.7839	1	2	1
5.4985	-11.8451	1	2	1
5.54016	-11.9062	1	2	1
5.58183	-11.9878	1	2	1
5.6235	-12.0387	1	2	1
5.66516	-11.9164	1	2	1
5.71377	-12.1611	1	2	1
5.75544	-12.2222	1	2	1
5.80405	-12.2834	1	2	1
5.85266	-12.3547	1	2	1
5.89433	-12.2528	1	2	1
5.936	-12.4873	1	2	1
5.97766	-12.5994	1	2	1
6.01933	-12.7217	1	2	1
6.061	-12.8542	1	2	1
6.10266	-12.9766	1	2	1
6.14433	-13.0581	1	2	1
6.186	-13.1702	1	2	1
6.22766	-13.2926	1	2	1
6.26933	-13.3843	1	2	1
6.311	-13.4557	1	2	1
6.35266	-13.476	1	2	1
6.39433	-13.5474	1	2	1
6.436	-13.6188	1	2	1
6.47766	-13.6901	1	2	1
6.51933	-13.7513	1	2	1
6.561	-13.8226	1	2	1
6.60266	-13.9042	1	2	1
6.64433	-13.9755	1	2	1
6.686	-14.0571	1	2	1
6.72766	-14.0775	1	2	1
6.76933	-14.21	1	2	1
6.811	-14.3017	1	2	1
6.85266	-14.4037	1	2	1
6.89433	-14.4852	1	2	1
6.936	-14.5566	1	2	1
6.97766	-14.6483	1	2	1
7.01933	-14.6687	1	2	1
7.061	-14.7503	1	2	1
7.10266	-14.8318	1	2	1
7.14433	-14.9134	1	2	1
7.186	-15.0255	1	2	1
7.22766	-15.107	1	2	1
7.26933	-15.1886	1	2	1
7.311	-15.2803	1	2	1
7.35266	-15.2905	1	2	1
7.39433	-15.3721	1	2	1
7.436	-15.474	1	2	1
7.47766	-15.5556	1	2	1
7.51933	-15.6065	1	2	1
7.561	-15.6881	1	2	1
7.60266	-15.7696	1	2	1
7.64433	-15.8512	1	2	1
7.686	-15.9327	1	2	1
7.72766	-16.055	1	2	1
7.76933	-16.1468	1	2	1
7.811	-16.2181	1	2	1
7.85266	-16.2895	1	2	1
7.89433	-16.3812	1	2	1
7.936	-16.4832	1	2	1
7.97766	-16.5851	1	2	1
8.01933	-16.6871	1	2	1
8.061	-16.7992	1	2	1
8.10266	-16.9113	1	2	1
8.14433	-17.0336	1	2	1
8.186	-17.156	1	2	1
8.22766	-17.3191	1	2	1
8.26933	-17.4618	1	2	1
8.311	-17.5943	1	2	1
8.35266	-17.7268	1	2	1
8.39433	-17.8491	1	2	1
8.436	-17.9511	1	2	1
8.47766	-18.0938	1	2	1
8.51933	-18.2773	1	2	1
8.56794	-18.4608	1	2	1
8.60961	-18.634	1	2	1
8.65127	-18.8277	1	2	1
8.69294	-18.9806	1	2	1
8.73461	-19.1437	1	2	1
8.77627	-19.3884	1	2	1
8.81794	-19.5923	1	2	1
8.85961	-19.7757	1	2	1
8.90127	-19.9898	1	2	1
8.94294	-20.1529	1	2	1
8.98461	-20.4281	1	2	1
9.02627	-20.6626	1	2	1
9.06794	-20.948	1	2	1
9.10961	-21.2946	1	2	1
9.15127	-21.5596	1	2	1
9.19294	-21.9062	1	2	1
9.23461	-22.1611	1	2	1
9.27627	-22.4567	1	2	1
9.32488	-22.8338	1	2	1
9.36655	-23.1397	1	2	1
9.40822	-23.4557	1	2	1
9.44988	-23.7717	1	2	1
9.49155	-24.1284	1	2	1
9.53322	-24.4954	1	2	1
9.57488	-24.8828	1	2	1
9.61655	-25.2701	1	2	1
9.65822	-25.6881	1	2	1
9.69988	-26.1366	1	2	1
9.74155	-26.5647	1	2	1
9.78322	-27.0133	1	2	1
9.82488	-27.4924	1	2	1
9.86655	-27.9817	1	2	1
9.90822	-28.5015	1	2	1
9.94988	-29.001	1	2	1
9.99155	-29.5821	1	2	1
10.0332	-30.1121	1	2	1
10.0818	-30.8869	1	2	1
10.1235	-31.5698	1	2	1
10.1652	-32.314	1	2	1
10.2068	-33.0377	1	2	1
10.2485	-33.7717	1	2	1
10.2902	-34.5362	1	2	1
10.3318	-35.2803	1	2	1
10.3735	-36.0652	1	2	1
10.4152	-36.9521	1	2	1
10.4568	-37.9103	1	2	1
10.4985	-38.9602	1	2	1
10.5402	-40.0306	1	2	1
10.5818	-41.2232	1	2	1
10.6304	-42.7727	1	2	1
10.6721	-44.1182	1	2	1
10.7138	-45.5556	1	2	1
10.7554	-47.0642	1	2	1
10.7971	-48.6952	1	2	1
10.8388	-50.2345	1	2	1
10.8804	-51.998	1	2	1
10.9221	-53.8634	1	2	1
10.9638	-55.8002	1	2	1
11.0054	-57.8186	1	2	1
11.0471	-59.8879	1	2	1
11.0888	-62.3649	1	2	1
11.1304	-64.8216	1	2	1
11.1721	-67.3496	1	2	1
11.2138	-69.7655	1	2	1
11.2554	-72.5076	1	2	1
11.3041	-75.6473	1	2	1
11.3457	-78.2773	1	2	1
11.3874	-80.8053	1	2	1
11.4291	-83.2722	1	2	1
11.4707	-85.5046	1	2	1
11.5124	-87.8389	1	2	1
11.5541	-90.0306	1	2	1
11.6027	-92.4159	1	2	1
11.6443	-94.4241	1	2	1
11.686	-96.2385	1	2	1
11.7277	-97.9817	1	2	1
11.7693	-99.7757	1	2	1
11.811	-101.692	1	2	1
11.8527	-103.445	1	2	1
11.8943	-104.862	1	2	1
11.936	-106.871	1	2	1
11.9777	-108.756	1	2	1
12.0193	-110.469	1	2	1
12.061	-112.304	1	2	1
12.1027	-114.027	1	2	1
12.1443	-115.596	1	2	1
12.186	-117.319	1	2	1
12.2277	-118.869	1	2	1
12.2693	-120.55	1	2	1
12.311	-122.192	1	2	1
12.3527	-123.761	1	2	1
12.3943	-125.168	1	2	1
12.436	-126.697	1	2	1
12.4777	-128.094	1	2	1
12.5193	-129.388	1	2	1
12.561	-130.754	1	2	1
12.6027	-131.998	1	2	1
12.6443	-133.242	1	2	1
12.686	-134.383	1	2	1
12.7277	-135.301	1	2	1
12.7693	-136.463	1	2	1
12.811	-137.319	1	2	1
12.8527	-138.114	1	2	1
12.8943	-139.021	1	2	1
12.936	-139.847	1	2	1
12.9777	-140.693	1	2	1
13.0193	-141.58	1	2	1
13.061	-142.253	1	2	1
13.1096	-143.262	1	2	1
13.1513	-143.996	1	2	1
13.1999	-144.781	1	2	1
13.2416	-145.413	1	2	1
13.2832	-146.106	1	2	1
13.3249	-146.809	1	2	1
13.3666	-147.472	1	2	1
13.4152	-148.359	1	2	1
13.4568	-149.001	1	2	1
13.4985	-149.582	1	2	1
13.5402	-150.163	1	2	1
13.5818	-150.734	1	2	1
13.6235	-151.295	1	2	1
13.6652	-151.835	1	2	1
13.7138	-152.141	1	2	1
13.7554	-152.579	1	2	1
13.7971	-153.191	1	2	1
13.8388	-153.629	1	2	1
13.8804	-153.996	1	2	1
13.9221	-154.179	1	2	1
13.9638	-154.76	1	2	1
14.0054	-155.229	1	2	1
14.0471	-155.586	1	2	1
14.0888	-156.075	1	2	1
14.1304	-156.188	1	2	1
14.1721	-156.636	1	2	1
14.2138	-157.064	1	2	1
14.2554	-157.503	1	2	1
14.2971	-157.971	1	2	1
14.3388	-158.298	1	2	1
14.3804	-158.828	1	2	1
14.4221	-159.317	1	2	1
14.4638	-159.766	1	2	1
14.5054	-160.204	1	2	1
14.5471	-160.652	1	2	1
14.5888	-161.06	1	2	1
14.6304	-161.529	1	2	1
14.6721	-161.937	1	2	1
14.7138	-162.304	1	2	1
14.7554	-162.457	1	2	1
14.7971	-162.742	1	2	1
14.8388	-162.844	1	2	1
14.8874	-163.333	1	2	1
14.9291	-163.721	1	2	1
14.9707	-164.088	1	2	1
15.0124	-164.506	1	2	1
15.0541	-164.638	1	2	1
15.0957	-165.087	1	2	1
15.1374	-165.494	1	2	1
15.1791	-165.739	1	2	1
15.2207	-166.035	1	2	1
15.2624	-166.381	1	2	1
15.3041	-166.595	1	2	1
15.3457	-166.922	1	2	1
15.3874	-167.38	1	2	1
15.4291	-167.696	1	2	1
15.4707	-167.961	1	2	1
15.5124	-168.298	1	2	1
15.5541	-168.624	1	2	1
15.5957	-168.94	1	2	1
15.6374	-169.297	1	2	1
15.6791	-169.45	1	2	1
15.7207	-169.735	1	2	1
15.7624	-169.837	1	2	1
15.8041	-170.275	1	2	1
15.8457	-170.632	1	2	1
15.8874	-170.897	1	2	1
15.9291	-171.264	1	2	1
15.9707	-171.448	1	2	1
16.0124	-171.804	1	2	1
16.0541	-171.998	1	2	1
16.0957	-172.314	1	2	1
16.1374	-172.661	1	2	1
16.1791	-173.068	1	2	1
16.2207	-173.456	1	2	1
16.2624	-173.67	1	2	1
16.3041	-174.139	1	2	1
16.3179	-173.996	1	2	1
16.3457	-174.281	1	2	1
16.3874	-174.444	1	2	1
16.4291	-174.75	1	2	1
16.4707	-175.087	1	2	1
16.5124	-175.474	1	2	1
16.5541	-175.861	1	2	1
16.5957	-176.086	1	2	1
16.6374	-176.34	1	2	1
16.6791	-176.636	1	2	1
16.7207	-176.983	1	2	1
16.7624	-177.146	1	2	1
16.8041	-177.441	1	2	1
16.8457	-178.104	1	2	1
16.8874	-178.379	1	2	1
16.9291	-178.94	1	2	1
16.9707	-179.327	1	2	1
17.0124	-178.919	1	2	1
17.0541	-179.501	1	2	1
17.1027	-180.316	1	2	1
17.1443	-180.775	1	2	1
17.186	-181.03	1	2	1
17.2277	-181.305	1	2	1
17.2693	-181.998	1	2	1
17.311	-182.294	1	2	1
17.3527	-182.446	1	2	1
17.4013	-183.017	1	2	1
17.4429	-183.884	1	2	1
17.4846	-183.904	1	2	1
17.5263	-184.495	1	2	1
17.5679	-184.975	1	2	1
17.6096	-185.566	1	2	1
17.6513	-186.249	1	2	1
17.6929	-186.769	1	2	1
17.7346	-187.085	1	2	1
17.7763	-188.104	1	2	1
17.8179	-188.532	1	2	1
17.8666	-189.348	1	2	1
17.9082	-189.908	1	2	1
17.9499	-191.06	1	2	1
17.9916	-191.774	1	2	1
18.0402	-192.538	1	2	1
18.0818	-192.956	1	2	1
18.1235	-194.088	1	2	1
18.1652	-194.995	1	2	1
18.2068	-195.586	1	2	1
18.2485	-197.105	1	2	1
18.2902	-197.401	1	2	1
18.3318	-199.042	1	2	1
18.3735	-199.633	1	2	1
18.4152	-200.724	1	2	1
18.4568	-201.845	1	2	1
18.4985	-203.231	1	2	1
18.5471	-205.454	1	2	1
18.5888	-206.442	1	2	1
18.6304	-208.043	1	2	1
18.6721	-209.48	1	2	1
18.7138	-210.52	1	2	1
18.7554	-212.834	1	2	1
18.7971	-214.913	1	2	1
18.8388	-217.309	1	2	1
18.8804	-219.378	1	2	1
18.9221	-221.713	1	2	1
18.9638	-223.425	1	2	1
19.0054	-224.292	1	2	1
19.0541	-228.196	1	2	1
19.0957	-231.753	1	2	1
19.1374	-235.484	1	2	1
19.1791	-237.92	1	2	1
19.2207	-241.814	1	2	1
19.2624	-244.098	1	2	1
19.311	-249.205	1	2	1
19.3527	-254.832	1	2	1
19.3943	-260.336	1	2	1
19.436	-265.688	1	2	1
19.4777	-274.077	1	2	1
19.5193	-281.753	1	2	1
19.561	-290.245	1	2	1
19.6027	-300.418	1	2	1
19.6443	-311.152	1	2	1
19.686	-319.908	1	2	1
19.7277	-331.784	1	2	1
19.7693	-345.912	1	2	1
19.811	-367.829	1	2	1
19.8527	-385.535	1	2	1
19.8943	-415.25	1	2	1
19.936	-455.474	1	2	1
19.9777	-495.301	1	2	1
20.0193	-544.638	1	2	1
20.061	-618.063	1	2	1
20.1027	-742.457	1	2	1
20.1443	-807.574	1	2	1
20.1929	-969.521	1	2	1
22.2483	-8970.44	1	2	1
0.00405093	-4.89297	1	1	1
0.00543981	-4.48522	1	1	1
0.0471065	-4.63812	1	1	1
0.0887731	-4.72987	1	1	1
0.13044	-4.86239	1	1	1
0.172106	-4.96432	1	1	1
0.213773	-4.9949	1	1	1
0.25544	-5.06626	1	1	1
0.297106	-5.13761	1	1	1
0.338773	-5.27013	1	1	1
0.38044	-5.35168	1	1	1
0.422106	-5.47401	1	1	1
0.463773	-5.60652	1	1	1
0.50544	-5.69827	1	1	1
0.547106	-5.8002	1	1	1
0.588773	-5.91233	1	1	1
0.63044	-5.9633	1	1	1
0.679051	-5.87156	1	1	1
0.720718	-6.04485	1	1	1
0.762384	-6.18756	1	1	1
0.81794	-6.25892	1	1	1
0.866551	-6.2895	1	1	1
0.908218	-6.43221	1	1	1
0.949884	-6.52396	1	1	1
0.991551	-6.6055	1	1	1
1.03322	-6.71764	1	1	1
1.07488	-6.83996	1	1	1
1.11655	-6.92151	1	1	1
1.15822	-7.01325	1	1	1
1.19988	-7.14577	1	1	1
1.2485	-7.17635	1	1	1
1.29016	-7.30887	1	1	1
1.33183	-7.40061	1	1	1
1.3735	-7.46177	1	1	1
1.42211	-7.52294	1	1	1
1.47072	-7.51274	1	1	1
1.51238	-7.59429	1	1	1
1.55405	-7.65545	1	1	1
1.59572	-7.69623	1	1	1
1.63738	-7.78797	1	1	1
1.67905	-7.81855	1	1	1
1.72072	-7.81855	1	1	1
1.76238	-7.96126	1	1	1
1.80405	-8.02243	1	1	1
1.84572	-8.12436	1	1	1
1.89433	-8.13456	1	1	1
1.936	-8.30785	1	1	1
1.97766	-8.30785	1	1	1
2.01933	-8.39959	1	1	1
2.061	-8.51172	1	1	1
2.11655	-8.65443	1	1	1
2.15822	-8.7054	1	1	1
2.19988	-8.82773	1	1	1
2.24155	-8.91947	1	1	1
2.28322	-9.04179	1	1	1
2.32488	-9.07238	1	1	1
2.36655	-9.14373	1	1	1
2.40822	-9.23547	1	1	1
2.44988	-9.29664	1	1	1
2.49155	-9.3578	1	1	1
2.53322	-9.42915	1	1	1
2.57488	-9.49032	1	1	1
2.6235	-9.55148	1	1	1
2.66516	-9.5107	1	1	1
2.72072	-9.73496	1	1	1
2.76238	-9.80632	1	1	1
2.80405	-9.87768	1	1	1
2.84572	-9.95923	1	1	1
2.88738	-10.0408	1	1	1
2.92905	-10.1019	1	1	1
2.97072	-10.2141	1	1	1
3.01238	-10.2345	1	1	1
3.05405	-10.2752	1	1	1
3.09572	-10.3874	1	1	1
3.14433	-10.4587	1	1	1
3.186	-10.4893	1	1	1
3.22766	-10.5607	1	1	1
3.27627	-10.6422	1	1	1
3.31794	-10.7136	1	1	1
3.35961	-10.7849	1	1	1
3.40127	-10.8461	1	1	1
3.44294	-10.897	1	1	1
3.48461	-10.9582	1	1	1
3.52627	-11.0194	1	1	1
3.56794	-11.1009	1	1	1
3.60961	-11.1519	1	1	1
3.65127	-11.2232	1	1	1
3.69294	-11.264	1	1	1
3.73461	-11.3456	1	1	1
3.77627	-11.3863	1	1	1
3.81794	-11.4067	1	1	1
3.85961	-11.4781	1	1	1
3.90127	-11.5494	1	1	1
3.94294	-11.6106	1	1	1
3.98461	-11.7125	1	1	1
4.02627	-11.7941	1	1	1
4.06794	-11.8145	1	1	1
4.11655	-11.9062	1	1	1
4.15822	-11.998	1	1	1
4.19988	-12.0897	1	1	1
4.2485	-11.9878	1	1	1
4.29016	-12.1305	1	1	1
4.33183	-12.2018	1	1	1
4.3735	-12.2936	1	1	1
4.41516	-12.3547	1	1	1
4.45683	-12.4159	1	1	1
4.4985	-12.4975	1	1	1
4.54711	-12.579	1	1	1
4.60266	-12.6707	1	1	1
4.64433	-12.7523	1	1	1
4.686	-12.8338	1	1	1
4.73461	-12.9562	1	1	1
4.77627	-13.0479	1	1	1
4.81794	-13.1397	1	1	1
4.85961	-13.2008	1	1	1
4.90822	-13.2926	1	1	1
4.94988	-13.3843	1	1	1
4.99155	-13.4862	1	1	1
5.03322	-13.578	1	1	1
5.07488	-13.7003	1	1	1
5.11655	-13.8022	1	1	1
5.16516	-13.9246	1	1	1
5.20683	-14.0367	1	1	1
5.2485	-14.0163	1	1	1
5.29016	-14.1284	1	1	1
5.33183	-14.21	1	1	1
5.3735	-14.2915	1	1	1
5.41516	-14.3731	1	1	1
5.45683	-14.4343	1	1	1
5.4985	-14.4954	1	1	1
5.54016	-14.5464	1	1	1
5.58183	-14.6279	1	1	1
5.6235	-14.6789	1	1	1
5.66516	-14.5872	1	1	1
5.71377	-14.8012	1	1	1
5.75544	-14.8624	1	1	1
5.80405	-14.9337	1	1	1
5.85266	-15.0153	1	1	1
5.89433	-14.9337	1	1	1
5.936	-15.1376	1	1	1
5.97766	-15.2803	1	1	1
6.01933	-15.3925	1	1	1
6.061	-15.5352	1	1	1
6.10266	-15.6473	1	1	1
6.14433	-15.7594	1	1	1
6.186	-15.8512	1	1	1
6.22766	-15.9735	1	1	1
6.26933	-16.055	1	1	1
6.311	-16.1264	1	1	1
6.35266	-16.1672	1	1	1
6.39433	-16.2385	1	1	1
6.436	-16.2997	1	1	1
6.47766	-16.3609	1	1	1
6.51933	-16.4526	1	1	1
6.561	-16.5138	1	1	1
6.60266	-16.5851	1	1	1
6.64433	-16.6769	1	1	1
6.686	-16.7482	1	1	1
6.72766	-16.7584	1	1	1
6.76933	-16.8909	1	1	1
6.811	-16.9725	1	1	1
6.85266	-17.0948	1	1	1
6.89433	-17.1662	1	1	1
6.936	-17.2375	1	1	1
6.97766	-17.3191	1	1	1
7.01933	-17.3394	1	1	1
7.061	-17.4312	1	1	1
7.10266	-17.5229	1	1	1
7.14433	-17.5841	1	1	1
7.186	-17.7064	1	1	1
7.22766	-17.7778	1	1	1
7.26933	-17.8593	1	1	1
7.311	-17.9613	1	1	1
7.35266	-17.9918	1	1	1
7.39433	-18.0836	1	1	1
7.436	-18.1549	1	1	1
7.47766	-18.2161	1	1	1
7.51933	-18.2977	1	1	1
7.561	-18.369	1	1	1
7.60266	-18.4709	1	1	1
7.64433	-18.5321	1	1	1
7.686	-18.6137	1	1	1
7.72766	-18.7462	1	1	1
7.76933	-18.8277	1	1	1
7.811	-18.9602	1	1	1
7.85266	-19.0112	1	1	1
7.89433	-19.1131	1	1	1
7.936	-19.2151	1	1	1
7.97766	-19.3068	1	1	1
8.01933	-19.4088	1	1	1
8.061	-19.5311	1	1	1
8.10266	-19.633	1	1	1
8.14433	-19.7554	1	1	1
8.186	-19.8981	1	1	1
8.22766	-20.051	1	1	1
8.26933	-20.2141	1	1	1
8.311	-20.3262	1	1	1
8.35266	-20.4485	1	1	1
8.39433	-20.5912	1	1	1
8.436	-20.6932	1	1	1
8.47766	-20.8563	1	1	1
8.51933	-21.0194	1	1	1
8.56794	-21.2232	1	1	1
8.60961	-21.4067	1	1	1
8.65127	-21.5902	1	1	1
8.69294	-21.7227	1	1	1
8.73461	-21.9266	1	1	1
8.77627	-22.1611	1	1	1
8.81794	-22.3751	1	1	1
8.85961	-22.5688	1	1	1
8.90127	-22.7625	1	1	1
8.94294	-22.9867	1	1	1
8.98461	-23.2518	1	1	1
9.02627	-23.5168	1	1	1
9.06794	-23.8022	1	1	1
9.10961	-24.1488	1	1	1
9.15127	-24.4343	1	1	1
9.19294	-24.7706	1	1	1
9.23461	-24.9847	1	1	1
9.27627	-25.3007	1	1	1
9.32488	-25.6677	1	1	1
9.36655	-26.0143	1	1	1
9.40822	-26.2997	1	1	1
9.44988	-26.6463	1	1	1
9.49155	-26.9929	1	1	1
9.53322	-27.3802	1	1	1
9.57488	-27.7472	1	1	1
9.61655	-28.1651	1	1	1
9.65822	-28.6035	1	1	1
9.69988	-29.0214	1	1	1
9.74155	-29.5005	1	1	1
9.78322	-29.949	1	1	1
9.82488	-30.4791	1	1	1
9.86655	-30.9582	1	1	1
9.90822	-31.4679	1	1	1
9.94988	-31.9674	1	1	1
9.99155	-32.5892	1	1	1
10.0332	-33.1091	1	1	1
10.0818	-33.945	1	1	1
10.1235	-34.6381	1	1	1
10.1652	-35.423	1	1	1
10.2068	-36.1774	1	1	1
10.2485	-36.8909	1	1	1
10.2902	-37.6555	1	1	1
10.3318	-38.42	1	1	1
10.3735	-39.2457	1	1	1
10.4152	-40.1325	1	1	1
10.4568	-41.1825	1	1	1
10.4985	-42.1916	1	1	1
10.5402	-43.3741	1	1	1
10.5818	-44.5464	1	1	1
10.6304	-46.106	1	1	1
10.6721	-47.5025	1	1	1
10.7138	-48.9806	1	1	1
10.7554	-50.5403	1	1	1
10.7971	-52.1713	1	1	1
10.8388	-53.8634	1	1	1
10.8804	-55.6779	1	1	1
10.9221	-57.6147	1	1	1
10.9638	-59.6636	1	1	1
11.0054	-61.8145	1	1	1
11.0471	-64.0163	1	1	1
11.0888	-66.5647	1	1	1
11.1304	-69.052	1	1	1
11.1721	-71.6514	1	1	1
11.2138	-74.1284	1	1	1
11.2554	-77.0133	1	1	1
11.3041	-80.3568	1	1	1
11.3457	-82.844	1	1	1
11.3874	-85.5556	1	1	1
11.4291	-88.104	1	1	1
11.4707	-90.5199	1	1	1
11.5124	-92.9358	1	1	1
11.5541	-95.1988	1	1	1
11.6027	-97.8491	1	1	1
11.6443	-99.8981	1	1	1
11.686	-101.957	1	1	1
11.7277	-103.904	1	1	1
11.7693	-105.729	1	1	1
11.811	-107.92	1	1	1
11.8527	-109.908	1	1	1
11.8943	-111.56	1	1	1
11.936	-113.884	1	1	1
11.9777	-115.872	1	1	1
12.0193	-117.717	1	1	1
12.061	-119.715	1	1	1
12.1027	-121.58	1	1	1
12.1443	-123.15	1	1	1
12.186	-124.995	1	1	1
12.2277	-126.84	1	1	1
12.2693	-128.308	1	1	1
12.311	-130.336	1	1	1
12.3527	-131.906	1	1	1
12.3943	-133.527	1	1	1
12.436	-135.138	1	1	1
12.4777	-136.595	1	1	1
12.5193	-138.033	1	1	1
12.561	-139.429	1	1	1
12.6027	-140.785	1	1	1
12.6443	-142.039	1	1	1
12.686	-143.262	1	1	1
12.7277	-144.2	1	1	1
12.7693	-145.505	1	1	1
12.811	-146.361	1	1	1
12.8527	-147.187	1	1	1
12.8943	-148.287	1	1	1
12.936	-149.225	1	1	1
12.9777	-150.224	1	1	1
13.0193	-151.223	1	1	1
13.061	-152.049	1	1	1
13.1096	-152.966	1	1	1
13.1513	-153.7	1	1	1
13.1999	-154.516	1	1	1
13.2416	-155.301	1	1	1
13.2832	-156.096	1	1	1
13.3249	-156.85	1	1	1
13.3666	-157.584	1	1	1
13.4152	-158.532	1	1	1
13.4568	-159.164	1	1	1
13.4985	-159.776	1	1	1
13.5402	-160.387	1	1	1
13.5818	-160.928	1	1	1
13.6235	-161.478	1	1	1
13.6652	-162.09	1	1	1
13.7138	-162.406	1	1	1
13.7554	-162.905	1	1	1
13.7971	-163.415	1	1	1
13.8388	-163.69	1	1	1
13.8804	-164.067	1	1	1
13.9221	-164.169	1	1	1
13.9638	-164.679	1	1	1
14.0054	-165.127	1	1	1
14.0471	-165.484	1	1	1
14.0888	-165.984	1	1	1
14.1304	-166.412	1	1	1
14.1721	-167.156	1	1	1
14.2138	-166.983	1	1	1
14.2554	-167.482	1	1	1
14.2971	-167.951	1	1	1
14.3388	-168.665	1	1	1
14.3804	-169.49	1	1	1
14.4221	-170.296	1	1	1
14.4638	-170.815	1	1	1
14.5054	-171.366	1	1	1
14.5471	-171.978	1	1	1
14.5888	-172.528	1	1	1
14.6304	-173.323	1	1	1
14.6721	-173.976	1	1	1
14.7138	-174.434	1	1	1
14.7554	-174.302	1	1	1
14.7971	-175.291	1	1	1
14.8388	-175.178	1	1	1
14.8874	-175.861	1	1	1
14.9291	-176.514	1	1	1
14.9707	-177.727	1	1	1
15.0124	-178.257	1	1	1
15.0541	-179.664	1	1	1
15.0957	-179.582	1	1	1
15.1374	-181.692	1	1	1
15.1791	-181.916	1	1	1
15.2207	-182.813	1	1	1
15.2624	-183.894	1	1	1
15.3041	-184.975	1	1	1
15.3457	-185.79	1	1	1
15.3874	-187.36	1	1	1
15.4291	-188.695	1	1	1
15.4707	-189.949	1	1	1
15.5124	-191.621	1	1	1
15.5541	-193.68	1	1	1
15.5957	-195.607	1	1	1
15.6374	-197.839	1	1	1
15.6791	-197.655	1	1	1
15.7207	-201.264	1	1	1
15.7624	-203.405	1	1	1
15.8041	-207.288	1	1	1
15.8457	-212.905	1	1	1
15.8874	-214.985	1	1	1
15.9291	-220.082	1	1	1
15.9707	-230.887	1	1	1
16.0124	-241.315	1	1	1
16.0541	-254.679	1	1	1
16.0957	-277.645	1	1	1
16.1374	-307.36	1	1	1
16.1791	-374.526	1	1	1
16.2207	-475.933	1	1	1
16.2624	-618.124	1	1	1
16.3041	-963.435	1	1	1
16.3179	-1033.18	1	1	1
18.5193	-8970.44	1	1	1
0.673772	0.622788	2	0	10000
1.2027	0.596394	2	0	10000
1.71677	0.575048	2	0	10000
1.88754	0.568173	2	0	10000
2.18258	0.550769	2	0	10000
2.65523	0.529327	2	0	10000
2.9913	0.515144	2	0	10000
3.23621	0.504519	2	0	10000
3.78558	0.485673	2	0	10000
4.20279	0.46899	2	0	10000
4.72096	0.449712	2	0	10000
4.92094	0.441683	2	0	10000
5.22481	0.426971	2	0	10000
5.66322	0.410913	2	0	10000
5.8942	0.403077	2	0	10000
6.12227	0.392212	2	0	10000
6.70104	0.37125	2	0	10000
6.90961	0.364231	2	0	10000
7.16829	0.355721	2	0	10000
7.7119	0.339856	2	0	10000
8.18705	0.32476	2	0	10000
8.75216	0.303462	2	0	10000
8.9142	0.296971	2	0	10000
9.13169	0.286683	2	0	10000
9.7512	0.258846	2	0	10000
10.0952	0.244087	2	0	10000
10.5835	0.222452	2	0	10000
11.2102	0.194087	2	0	10000
11.7161	0.173269	2	0	10000
11.8931	0.166971	2	0	10000
12.1089	0.15976	2	0	10000
12.698	0.140577	2	0	10000
12.8981	0.134567	2	0	10000
13.187	0.126202	2	0	10000
13.6892	0.113365	2	0	10000
13.8815	0.109038	2	0	10000
14.1095	0.104038	2	0	10000
14.1233	0.10375	2	0	10000
14.8247	0.0895673	2	0	10000
15.0489	0.0859135	2	0	10000
15.1633	0.0838462	2	0	10000
15.7339	0.0747596	2	0	10000
15.8868	0.0725	2	0	10000
16.1668	0.0681731	2	0	10000
16.7516	0.0597115	2	0	10000
16.9732	0.056875	2	0	10000
17.1675	0.0544712	2	0	10000
17.7448	0.0477885	2	0	10000
18.1885	0.0427885	2	0	10000
18.7031	0.0374038	2	0	10000
19.0006	0.0345192	2	0	10000
19.2837	0.0316346	2	0	10000
19.6796	0.0274519	2	0	10000
20.1555	0.0224519	2	0	10000
20.6913	0.0165865	2	0	10000
21.2159	0.0114904	2	0	10000
21.7168	0.00740385	2	0	10000
21.9648	0.00552885	2	0	10000
22.091	0.00456731	2	0	10000
22.2483	0.00369152	2	0	10000

## Sheet: tens_interpolation
		Datum / Zeit	Tension unten [hPa]	Tension oben [hPa]
m_bot	b_bot	41486.6	1.83	4.24
117.257	-4.8646e+06	41486.6	2.4	4.8
m_top	b_top	41486.6	1.925	4.33333
115.2	-4.77926e+06	y = m*x+b
		AE unten [t]	AE oben [t]
		41227.2
			Brutto-Gewicht [g]	Netto-Gewicht [g]
-1.15786	48444.9	41508.7	383.55	5.65
		41509.4	382.81	4.91
-1.15786	48067	41508.9	383.368	5.46784
