# Supplementary material for: A pore-size classification for peat bogs derived from unsaturated hydraulic properties
Source: Copernicus journal article supplement (doi:10.5194/hess-21-6185-2017), 2017-12-07
Supplement: Supplementary file 5 [file A2_HYDRUS.xlsx]

## Sheet: Gewicht
Datum / Zeit	Brutto-Gewicht [g]	Netto-Gewicht [g]	Gewichtsänderung [g]	Zeit [d]	Theta [-]	Verdunstungsrate [cm/d]		Volumen	238
2012-10-28 16:26:22	812.06	241.66	0					Höhe	5
2012-10-29 07:47:46	800.27	229.87	-11.79	0.639861	0.904496	0.387098		A	47.6
2012-10-29 17:51:03	792.63	222.23	-19.43	1.05881	0.872395	0.383114		Theta0	0.954034
2012-10-30 07:55:47	783.23	212.83	-28.83	1.64543	0.832899	0.336638		Trockengewicht	14.6
2012-10-30 20:35:43	775.86	205.46	-36.2	2.17316	0.801933	0.293392		Ks (as in Ksat)
2012-10-31 08:44:46	768.51	198.11	-43.55	2.67944	0.77105	0.30499		delta System [g]	570.4
2012-10-31 14:11:06	765.19	194.79	-46.87	2.90606	0.757101	0.307774
2012-10-31 17:04:07	763.48	193.08	-48.58	3.02622	0.749916	0.298995
2012-11-01 08:00:18	754.37	183.97	-57.69	3.64856	0.711639	0.307523
2012-11-01 17:05:20	748.14	177.74	-63.92	4.02706	0.685462	0.345796
2012-11-02 10:52:29	736.11	165.71	-75.95	4.76814	0.634916	0.341032
2012-11-02 20:10:01	729.55	159.15	-82.51	5.15531	0.607353	0.35595
2012-11-03 10:23:19	719.74	149.34	-92.32	5.74788	0.566134	0.347795
2012-11-03 18:26:01	714.61	144.21	-97.45	6.08309	0.54458	0.321511
2012-11-04 11:18:10	703.45	133.05	-108.61	6.78597	0.497689	0.333561
2012-11-04 19:27:32	698.26	127.86	-113.8	7.12581	0.475882	0.32084
2012-11-05 11:06:56	688.94	118.54	-123.12	7.77817	0.436723	0.300138
2012-11-05 20:05:41	683.64	113.24	-128.42	8.1523	0.414454	0.297608
2012-11-06 11:30:13	675.29	104.89	-136.77	8.79434	0.37937	0.273224
2012-11-06 20:54:04	669.96	99.56	-142.1	9.1859	0.356975	0.285969
2012-11-07 10:03:52	662.47	92.07	-149.59	9.73438	0.325504	0.286893
2012-11-07 18:52:02	657.74	87.34	-154.32	10.1012	0.30563	0.270923
2012-11-08 10:02:53	649.35	78.95	-162.71	10.7337	0.270378	0.278657
2012-11-08 18:31:26	645.05	74.65	-167.01	11.0869	0.252311	0.255794
2012-11-09 08:29:37	638.42	68.02	-173.64	11.6689	0.224454	0.239293
2012-11-10 22:08:14	624.28	53.88	-187.78	13.2374	0.165042	0.189392
2012-11-11 13:45:38	619.89	49.49	-192.17	13.8884	0.146597	0.141676
2012-11-11 18:27:40	618.6	48.2	-193.46	14.0842	0.141176	0.138371
2012-11-12 09:51:43	614.56	44.16	-197.5	14.7259	0.124202	0.132264
2012-11-15 10:51:45	599.87	29.47	-212.19	17.7676	0.062479	0.101461
2012-11-16 06:59:39	595.819	25.4189		18.6064	0.0454575	0.101461

## Sheet: Tensionen
Datum / Zeit	Tension unten [hPa]	Tension oben [hPa]	Zeit [d]	MP bot(2) [cm]	MP top(1) [cm]		WÄGUNG START
2012-10-28 15:19:39	-0.54	1.97	-0.046331	0.550459	-2.00815		41210.7
2012-10-28 15:29:39	-0.55	1.96	-0.0393866	0.560652	-1.99796		2012-10-28 16:26:22
2012-10-28 15:39:39	-0.55	1.96	-0.0324421	0.560652	-1.99796
2012-10-28 15:49:39	-0.55	1.96	-0.0254977	0.560652	-1.99796
2012-10-28 15:59:39	-0.55	1.96	-0.0185532	0.560652	-1.99796
2012-10-28 16:09:39	-0.54	1.97	-0.0116088	0.550459	-2.00815
2012-10-28 16:19:39	-0.4	2.12	-0.00466435	0.407747	-2.16106
2012-10-28 16:29:39	-0.41	2.1	0.00228009	0.417941	-2.14067
2012-10-28 16:39:39	-0.37	2.12	0.00922454	0.377166	-2.16106
2012-10-28 16:49:39	-0.34	2.14	0.016169	0.346585	-2.18145
2012-10-28 16:59:39	-0.32	2.16	0.0231134	0.326198	-2.20183
2012-10-28 17:09:39	-0.28	2.19	0.0300579	0.285423	-2.23242
2012-10-28 17:19:39	-0.25	2.21	0.0370023	0.254842	-2.2528
2012-10-28 17:29:39	-0.24	2.25	0.0439468	0.244648	-2.29358
2012-10-28 17:39:39	-0.21	2.28	0.0508912	0.214067	-2.32416
2012-10-28 17:49:39	-0.52	2.3	0.0578356	0.530071	-2.34455
2012-10-28 17:59:39	-0.21	2.34	0.0647801	0.214067	-2.38532
2012-10-28 18:09:39	-0.13	2.36	0.0717245	0.132518	-2.40571
2012-10-28 18:19:39	-0.09	2.39	0.078669	0.0917431	-2.43629
2012-10-28 18:29:39	-0.07	2.41	0.0856134	0.0713558	-2.45668	2012-10-28 18:29:39
2012-10-28 18:39:39	-0.05	2.44	0.0925579	0.0509684	-2.48726
2012-10-28 18:49:39	-0.02	2.47	0.0995023	0.0203874	-2.51784
2012-10-28 18:59:39	0.02	2.5	0.106447	-0.0203874	-2.54842
2012-10-28 19:09:39	0.04	2.54	0.113391	-0.0407747	-2.58919
2012-10-28 19:19:39	0.08	2.57	0.120336	-0.0815494	-2.61978
2012-10-28 19:29:39	0.1	2.6	0.12728	-0.101937	-2.65036	2012-10-28 19:29:39
2012-10-28 19:39:39	0.12	2.63	0.134225	-0.122324	-2.68094
2012-10-28 19:49:39	0.15	2.66	0.141169	-0.152905	-2.71152
2012-10-28 19:59:39	0.19	2.68	0.148113	-0.19368	-2.73191
2012-10-28 20:09:39	0.22	2.71	0.155058	-0.224261	-2.76249
2012-10-28 20:19:39	0.24	2.73	0.162002	-0.244648	-2.78287
2012-10-28 20:29:39	0.26	2.77	0.168947	-0.265036	-2.82365	2012-10-28 20:29:39
2012-10-28 20:39:39	0.3	2.8	0.175891	-0.30581	-2.85423
2012-10-28 20:49:39	0.32	2.82	0.182836	-0.326198	-2.87462
2012-10-28 20:59:39	0.34	2.84	0.18978	-0.346585	-2.89501
2012-10-28 21:09:39	0.37	2.88	0.196725	-0.377166	-2.93578
2012-10-28 21:19:39	0.41	2.91	0.203669	-0.417941	-2.96636
2012-10-28 21:29:39	0.43	2.94	0.210613	-0.438328	-2.99694	2012-10-28 21:29:39
2012-10-28 21:39:39	0.46	2.97	0.217558	-0.468909	-3.02752
2012-10-28 21:49:39	0.5	3.01	0.224502	-0.509684	-3.0683
2012-10-28 21:59:39	0.54	3.04	0.231447	-0.550459	-3.09888
2012-10-28 22:09:39	0.57	3.09	0.238391	-0.58104	-3.14985
2012-10-28 22:19:39	0.61	3.12	0.245336	-0.621814	-3.18043
2012-10-28 22:29:39	0.65	3.15	0.25228	-0.662589	-3.21101	2012-10-28 22:29:39
2012-10-28 22:39:39	0.67	3.19	0.259225	-0.682977	-3.25178
2012-10-28 22:49:39	0.72	3.22	0.266169	-0.733945	-3.28236
2012-10-28 22:59:39	0.74	3.26	0.273113	-0.754332	-3.32314
2012-10-28 23:09:39	0.77	3.29	0.280058	-0.784913	-3.35372
2012-10-28 23:19:39	0.81	3.32	0.287002	-0.825688	-3.3843
2012-10-28 23:29:39	0.84	3.36	0.293947	-0.856269	-3.42508	2012-10-28 23:29:39
2012-10-28 23:39:39	0.89	3.39	0.300891	-0.907238	-3.45566
2012-10-28 23:49:39	0.92	3.43	0.307836	-0.937819	-3.49643
2012-10-28 23:59:39	0.94	3.45	0.31478	-0.958206	-3.51682
2012-10-29 00:09:39	0.98	3.49	0.321725	-0.998981	-3.55759
2012-10-29 00:19:39	1.01	3.53	0.328669	-1.02956	-3.59837
2012-10-29 00:29:39	1.05	3.57	0.335613	-1.07034	-3.63914	2012-10-29 00:29:39
2012-10-29 00:39:39	1.09	3.6	0.342558	-1.11111	-3.66972
2012-10-29 00:49:39	1.12	3.63	0.349502	-1.14169	-3.70031
2012-10-29 00:59:39	1.09	3.6	0.356447	-1.11111	-3.66972
2012-10-29 01:09:39	1.12	3.64	0.363391	-1.14169	-3.7105
2012-10-29 01:19:39	1.17	3.68	0.370336	-1.19266	-3.75127
2012-10-29 01:29:39	1.2	3.72	0.37728	-1.22324	-3.79205	2012-10-29 01:29:39
2012-10-29 01:39:39	1.24	3.76	0.384225	-1.26402	-3.83282
2012-10-29 01:49:39	1.28	3.8	0.391169	-1.30479	-3.8736
2012-10-29 01:59:39	1.31	3.82	0.398113	-1.33537	-3.89399
2012-10-29 02:09:39	1.33	3.84	0.405058	-1.35576	-3.91437
2012-10-29 02:19:39	1.37	3.89	0.412002	-1.39653	-3.96534
2012-10-29 02:29:39	1.4	3.92	0.418947	-1.42712	-3.99592	2012-10-29 02:29:39
2012-10-29 02:39:39	1.4	3.92	0.425891	-1.42712	-3.99592
2012-10-29 02:49:39	1.45	3.97	0.432836	-1.47808	-4.04689
2012-10-29 02:59:39	1.49	4	0.43978	-1.51886	-4.07747
2012-10-29 03:09:39	1.54	4.05	0.446725	-1.56983	-4.12844
2012-10-29 03:19:39	1.57	4.08	0.453669	-1.60041	-4.15902
2012-10-29 03:29:39	1.61	4.11	0.460613	-1.64118	-4.1896	2012-10-29 03:29:39
2012-10-29 03:39:39	1.64	4.16	0.467558	-1.67176	-4.24057
2012-10-29 03:49:39	1.69	4.2	0.474502	-1.72273	-4.28135
2012-10-29 03:59:39	1.7	4.22	0.481447	-1.73293	-4.30173
2012-10-29 04:09:39	1.73	4.25	0.488391	-1.76351	-4.33231
2012-10-29 04:19:39	1.79	4.3	0.495336	-1.82467	-4.38328
2012-10-29 04:29:39	1.8	4.31	0.50228	-1.83486	-4.39348	2012-10-29 04:29:39
2012-10-29 04:39:39	1.85	4.37	0.509225	-1.88583	-4.45464
2012-10-29 04:49:39	1.86	4.37	0.516169	-1.89602	-4.45464
2012-10-29 04:59:39	1.92	4.43	0.523113	-1.95719	-4.5158
2012-10-29 05:09:39	1.95	4.46	0.530058	-1.98777	-4.54638
2012-10-29 05:19:39	2	4.51	0.537002	-2.03874	-4.59735
2012-10-29 05:29:39	2.03	4.54	0.543947	-2.06932	-4.62793	2012-10-29 05:29:39
2012-10-29 05:39:39	2.04	4.56	0.550891	-2.07951	-4.64832
2012-10-29 05:49:39	2.07	4.59	0.557836	-2.11009	-4.6789
2012-10-29 05:59:39	2.1	4.61	0.56478	-2.14067	-4.69929
2012-10-29 06:09:39	2.11	4.62	0.571725	-2.15087	-4.70948
2012-10-29 06:19:39	2.14	4.65	0.578669	-2.18145	-4.74006
2012-10-29 06:29:39	2.16	4.67	0.585613	-2.20183	-4.76045	2012-10-29 06:29:39
2012-10-29 06:39:39	2.21	4.72	0.592558	-2.2528	-4.81142
2012-10-29 06:49:39	2.25	4.75	0.599502	-2.29358	-4.842
2012-10-29 06:59:39	2.23	4.75	0.606447	-2.27319	-4.842
2012-10-29 07:09:39	2.2	4.7	0.613391	-2.24261	-4.79103
2012-10-29 07:19:39	2.21	4.72	0.620336	-2.2528	-4.81142
2012-10-29 07:29:39	2.28	4.79	0.62728	-2.32416	-4.88277	2012-10-29 07:29:39
2012-10-29 07:39:39	2.32	4.83	0.634225	-2.36493	-4.92355
2012-10-29 07:49:39	2.16	4.67	0.641169	-2.20183	-4.76045
2012-10-29 07:59:39	2.23	4.75	0.648113	-2.27319	-4.842
2012-10-29 08:09:39	2.2	4.71	0.655058	-2.24261	-4.80122
2012-10-29 08:19:39	2.26	4.78	0.662002	-2.30377	-4.87258
2012-10-29 08:29:39	2.31	4.81	0.668947	-2.35474	-4.90316	2012-10-29 08:29:39
2012-10-29 08:39:39	2.35	4.85	0.675891	-2.39551	-4.94393
2012-10-29 08:49:39	2.35	4.85	0.682836	-2.39551	-4.94393
2012-10-29 08:59:39	2.41	4.91	0.68978	-2.45668	-5.0051
2012-10-29 09:09:39	2.34	4.86	0.696725	-2.38532	-4.95413
2012-10-29 09:19:39	2.41	4.92	0.703669	-2.45668	-5.01529
2012-10-29 09:29:39	2.45	4.96	0.710613	-2.49745	-5.05607	2012-10-29 09:29:39
2012-10-29 09:39:39	2.5	5	0.717558	-2.54842	-5.09684
2012-10-29 09:49:39	2.53	5.04	0.724502	-2.579	-5.13761
2012-10-29 09:59:39	2.56	5.08	0.731447	-2.60958	-5.17839
2012-10-29 10:09:39	2.62	5.12	0.738391	-2.67074	-5.21916
2012-10-29 10:19:39	2.64	5.14	0.745336	-2.69113	-5.23955
2012-10-29 10:29:39	2.67	5.18	0.75228	-2.72171	-5.28033	2012-10-29 10:29:39
2012-10-29 10:39:39	2.7	5.21	0.759225	-2.75229	-5.31091
2012-10-29 10:49:39	2.74	5.24	0.766169	-2.79307	-5.34149
2012-10-29 10:59:39	2.77	5.27	0.773113	-2.82365	-5.37207
2012-10-29 11:09:39	2.79	5.29	0.780058	-2.84404	-5.39246
2012-10-29 11:19:39	2.79	5.28	0.787002	-2.84404	-5.38226
2012-10-29 11:29:39	2.78	5.29	0.793947	-2.83384	-5.39246	2012-10-29 11:29:39
2012-10-29 11:39:39	2.82	5.32	0.800891	-2.87462	-5.42304
2012-10-29 11:49:39	2.84	5.34	0.807836	-2.89501	-5.44343
2012-10-29 11:59:39	2.85	5.35	0.81478	-2.9052	-5.45362
2012-10-29 12:09:39	2.87	5.37	0.821725	-2.92559	-5.47401
2012-10-29 12:19:39	2.88	5.38	0.828669	-2.93578	-5.4842
2012-10-29 12:29:39	2.89	5.38	0.835613	-2.94597	-5.4842	2012-10-29 12:29:39
2012-10-29 12:39:39	2.9	5.4	0.842558	-2.95617	-5.50459
2012-10-29 12:49:39	2.91	5.43	0.849502	-2.96636	-5.53517
2012-10-29 12:59:39	2.93	5.43	0.856447	-2.98675	-5.53517
2012-10-29 13:09:39	2.94	5.44	0.863391	-2.99694	-5.54536
2012-10-29 13:19:39	2.97	5.45	0.870336	-3.02752	-5.55556
2012-10-29 13:29:39	2.96	5.47	0.87728	-3.01733	-5.57594	2012-10-29 13:29:39
2012-10-29 13:39:39	3	5.48	0.884225	-3.0581	-5.58614
2012-11-01 00:09:39	4.86	7.31	3.32172	-4.95413	-7.45158
2012-11-01 00:19:39	4.88	7.32	3.32867	-4.97452	-7.46177
2012-11-01 00:29:39	4.89	7.35	3.33561	-4.98471	-7.49235	2012-11-01 00:29:39
2012-11-01 00:39:39	4.9	7.36	3.34256	-4.9949	-7.50255
2012-11-01 00:49:39	4.93	7.39	3.3495	-5.02548	-7.53313
2012-11-01 00:59:39	4.91	7.36	3.35645	-5.0051	-7.50255
2012-11-01 01:09:39	4.94	7.4	3.36339	-5.03568	-7.54332
2012-11-01 01:19:39	4.96	7.42	3.37034	-5.05607	-7.56371
2012-11-01 01:29:39	4.97	7.44	3.37728	-5.06626	-7.5841	2012-11-01 01:29:39
2012-11-01 01:39:39	4.99	7.45	3.38422	-5.08665	-7.59429
2012-11-01 01:49:39	5	7.47	3.39117	-5.09684	-7.61468
2012-11-01 01:59:39	5	7.47	3.39811	-5.09684	-7.61468
2012-11-01 02:09:39	5.02	7.49	3.40506	-5.11723	-7.63507
2012-11-01 02:19:39	5.04	7.49	3.412	-5.13761	-7.63507
2012-11-01 02:29:39	5.04	7.51	3.41895	-5.13761	-7.65545	2012-11-01 02:29:39
2012-11-01 02:39:39	5.05	7.52	3.42589	-5.14781	-7.66565
2012-11-01 02:49:39	5.08	7.54	3.43284	-5.17839	-7.68603
2012-11-01 02:59:39	5.08	7.54	3.43978	-5.17839	-7.68603
2012-11-01 03:09:39	5.1	7.55	3.44672	-5.19878	-7.69623
2012-11-01 03:19:39	5.08	7.55	3.45367	-5.17839	-7.69623
2012-11-01 03:29:39	5.12	7.58	3.46061	-5.21916	-7.72681	2012-11-01 03:29:39
2012-11-01 03:39:39	5.15	7.61	3.46756	-5.24975	-7.75739
2012-11-01 03:49:39	5.16	7.63	3.4745	-5.25994	-7.77778
2012-11-01 03:59:39	5.16	7.63	3.48145	-5.25994	-7.77778
2012-11-01 04:09:39	5.2	7.66	3.48839	-5.30071	-7.80836
2012-11-01 04:19:39	5.22	7.68	3.49534	-5.3211	-7.82875
2012-11-01 04:29:39	5.23	7.7	3.50228	-5.33129	-7.84913	2012-11-01 04:29:39
2012-11-01 04:39:39	5.24	7.7	3.50922	-5.34149	-7.84913
2012-11-01 04:49:39	5.25	7.73	3.51617	-5.35168	-7.87971
2012-11-01 04:59:39	5.28	7.75	3.52311	-5.38226	-7.9001
2012-11-01 05:09:39	5.29	7.76	3.53006	-5.39246	-7.9103
2012-11-01 05:19:39	5.29	7.77	3.537	-5.39246	-7.92049
2012-11-01 05:29:39	5.32	7.79	3.54395	-5.42304	-7.94088	2012-11-01 05:29:39
2012-11-01 05:39:39	5.34	7.81	3.55089	-5.44343	-7.96126
2012-11-01 05:49:39	5.36	7.83	3.55784	-5.46381	-7.98165
2012-11-01 05:59:39	5.37	7.84	3.56478	-5.47401	-7.99185
2012-11-01 06:09:39	5.4	7.86	3.57172	-5.50459	-8.01223
2012-11-01 06:19:39	5.42	7.87	3.57867	-5.52497	-8.02243
2012-11-01 06:29:39	5.43	7.88	3.58561	-5.53517	-8.03262	2012-11-01 06:29:39
2012-11-01 06:39:39	5.42	7.89	3.59256	-5.52497	-8.04281
2012-11-01 06:49:39	5.43	7.9	3.5995	-5.53517	-8.05301
2012-11-01 06:59:39	5.45	7.92	3.60645	-5.55556	-8.07339
2012-11-01 07:09:39	5.48	7.95	3.61339	-5.58614	-8.10398
2012-11-01 07:19:39	5.49	7.95	3.62034	-5.59633	-8.10398
2012-11-01 07:29:39	5.47	7.94	3.62728	-5.57594	-8.09378	2012-11-01 07:29:39
2012-11-01 07:39:39	5.5	7.96	3.63422	-5.60652	-8.11417
2012-11-01 07:49:39	5.38	7.84	3.64117	-5.4842	-7.99185
2012-11-01 08:09:39	5.28	7.77	3.65506	-5.38226	-7.92049
2012-11-01 08:19:39	5.26	7.75	3.662	-5.36188	-7.9001
2012-11-01 08:29:39	5.31	7.79	3.66895	-5.41284	-7.94088
2012-11-01 08:39:39	5.35	7.84	3.67589	-5.45362	-7.99185	2012-11-01 08:39:39
2012-11-01 08:49:39	5.2	7.7	3.68284	-5.30071	-7.84913
2012-11-01 08:59:39	5.26	7.75	3.68978	-5.36188	-7.9001
2012-11-01 09:09:39	5.31	7.81	3.69672	-5.41284	-7.96126
2012-11-01 09:19:39	5.36	7.85	3.70367	-5.46381	-8.00204
2012-11-01 09:29:39	5.41	7.9	3.71061	-5.51478	-8.05301
2012-11-01 09:39:39	5.46	7.92	3.71756	-5.56575	-8.07339	2012-11-01 09:39:39
2012-11-01 09:49:39	4.82	7.96	3.7245	-4.91335	-8.11417
2012-11-01 09:59:39	5.25	7.76	3.73145	-5.35168	-7.9103
2012-11-01 10:09:39	5.59	7.65	3.73839	-5.69827	-7.79817
2012-11-01 10:19:39	5.26	7.76	3.74534	-5.36188	-7.9103
2012-11-01 10:29:39	5.31	7.82	3.75228	-5.41284	-7.97146
2012-11-01 10:39:39	5.38	7.87	3.75922	-5.4842	-8.02243	2012-11-01 10:39:39
2012-11-01 10:49:39	5.37	7.87	3.76617	-5.47401	-8.02243
2012-11-01 10:59:39	5.44	7.94	3.77311	-5.54536	-8.09378
2012-11-01 11:09:39	5.49	7.98	3.78006	-5.59633	-8.13456
2012-11-01 11:19:39	5.53	8.01	3.787	-5.6371	-8.16514
2012-11-01 11:29:39	5.54	8.02	3.79395	-5.6473	-8.17533
2012-11-01 11:39:39	5.59	8.06	3.80089	-5.69827	-8.21611	2012-11-01 11:39:39
2012-11-01 11:49:39	5.47	7.95	3.80784	-5.57594	-8.10398
2012-11-01 11:59:39	5.52	7.99	3.81478	-5.62691	-8.14475
2012-11-01 12:09:39	5.57	8.05	3.82172	-5.67788	-8.20591
2012-11-01 12:19:39	5.61	8.09	3.82867	-5.71865	-8.24669
2012-11-01 12:29:39	5.62	8.1	3.83561	-5.72885	-8.25688
2012-11-01 12:39:39	5.65	8.13	3.84256	-5.75943	-8.28746	2012-11-01 12:39:39
2012-11-01 12:49:39	5.67	8.16	3.8495	-5.77982	-8.31804
2012-11-01 12:59:39	5.69	8.17	3.85645	-5.8002	-8.32824
2012-11-01 13:09:39	5.72	8.21	3.86339	-5.83078	-8.36901
2012-11-01 13:19:39	5.74	8.22	3.87034	-5.85117	-8.3792
2012-11-01 13:29:39	5.76	8.25	3.87728	-5.87156	-8.40979
2012-11-01 13:39:39	5.79	8.26	3.88422	-5.90214	-8.41998	2012-11-01 13:39:39
2012-11-01 13:49:39	5.78	8.25	3.89117	-5.89195	-8.40979
2012-11-01 13:59:39	5.8	8.28	3.89811	-5.91233	-8.44037
2012-11-01 14:09:39	5.84	8.32	3.90506	-5.95311	-8.48114
2012-11-01 14:19:39	5.87	8.33	3.912	-5.98369	-8.49134
2012-11-01 14:29:39	5.88	8.36	3.91895	-5.99388	-8.52192
2012-11-01 14:39:39	5.89	8.37	3.92589	-6.00408	-8.53211	2012-11-01 14:39:39
2012-11-01 14:49:39	5.91	8.39	3.93284	-6.02446	-8.5525
2012-11-01 14:59:39	5.92	8.41	3.93978	-6.03466	-8.57288
2012-11-01 15:09:39	5.95	8.44	3.94672	-6.06524	-8.60347
2012-11-01 15:19:39	5.98	8.46	3.95367	-6.09582	-8.62385
2012-11-01 15:29:39	6.01	8.49	3.96061	-6.1264	-8.65443
2012-11-01 15:39:39	6.03	8.52	3.96756	-6.14679	-8.68502	2012-11-01 15:39:39
2012-11-01 15:49:39	6.03	8.53	3.9745	-6.14679	-8.69521
2012-11-01 15:59:39	6.06	8.55	3.98145	-6.17737	-8.7156
2012-11-01 16:09:39	6.06	8.57	3.98839	-6.17737	-8.73598
2012-11-01 16:19:39	6.08	8.58	3.99534	-6.19776	-8.74618
2012-11-01 16:29:39	6.1	8.62	4.00228	-6.21814	-8.78695
2012-11-01 16:39:39	6.12	8.63	4.00922	-6.23853	-8.79715	2012-11-01 16:39:39
2012-11-01 16:49:39	6.11	8.62	4.01617	-6.22834	-8.78695
2012-11-01 16:59:39	6.16	8.67	4.02311	-6.27931	-8.83792
2012-11-01 17:09:39	6.07	8.6	4.03006	-6.18756	-8.76656
2012-11-01 17:19:39	6.15	8.68	4.037	-6.26911	-8.84811
2012-11-01 17:29:39	6.17	8.71	4.04395	-6.2895	-8.8787
2012-11-01 17:39:39	6.18	8.72	4.05089	-6.29969	-8.88889	2012-11-01 17:39:39
2012-11-01 17:49:39	6.17	8.71	4.05784	-6.2895	-8.8787
2012-11-01 17:59:39	5.99	8.52	4.06478	-6.10601	-8.68502
2012-11-01 18:09:39	6.02	8.58	4.07172	-6.1366	-8.74618
2012-11-01 18:19:39	6.1	8.65	4.07867	-6.21814	-8.81753
2012-11-01 18:29:39	6.16	8.71	4.08561	-6.27931	-8.8787
2012-11-01 18:39:39	6.2	8.74	4.09256	-6.32008	-8.90928	2012-11-01 18:39:39
2012-11-01 18:49:39	6.23	8.77	4.0995	-6.35066	-8.93986
2012-11-01 18:59:39	6.26	8.8	4.10645	-6.38124	-8.97044
2012-11-01 19:09:39	6.29	8.83	4.11339	-6.41182	-9.00102
2012-11-01 19:19:39	6.18	8.71	4.12034	-6.29969	-8.8787
2012-11-01 19:29:39	6.26	8.81	4.12728	-6.38124	-8.98063
2012-11-01 19:39:39	6.32	8.86	4.13422	-6.44241	-9.0316	2012-11-01 19:39:39
2012-11-01 19:49:39	6.33	8.89	4.14117	-6.4526	-9.06218
2012-11-01 19:59:39	6.37	8.91	4.14811	-6.49337	-9.08257
2012-11-01 20:09:39	6.4	8.93	4.15506	-6.52396	-9.10296
2012-11-01 20:19:39	6.38	8.93	4.162	-6.50357	-9.10296
2012-11-01 20:29:39	6.4	8.95	4.16895	-6.52396	-9.12334
2012-11-01 20:39:39	6.43	8.99	4.17589	-6.55454	-9.16412	2012-11-01 20:39:39
2012-11-01 20:49:39	6.45	8.99	4.18284	-6.57492	-9.16412
2012-11-01 20:59:39	6.48	9.03	4.18978	-6.6055	-9.20489
2012-11-01 21:09:39	6.51	9.06	4.19672	-6.63609	-9.23547
2012-11-01 21:19:39	6.54	9.09	4.20367	-6.66667	-9.26606
2012-11-01 21:29:39	6.55	9.12	4.21061	-6.67686	-9.29664
2012-11-01 21:39:39	6.57	9.14	4.21756	-6.69725	-9.31702	2012-11-01 21:39:39
2012-11-01 21:49:39	6.6	9.16	4.2245	-6.72783	-9.33741
2012-11-01 21:59:39	6.61	9.18	4.23145	-6.73802	-9.3578
2012-11-01 22:09:39	6.63	9.19	4.23839	-6.75841	-9.36799
2012-11-01 22:19:39	6.65	9.23	4.24534	-6.7788	-9.40877
2012-11-01 22:29:39	6.67	9.24	4.25228	-6.79918	-9.41896
2012-11-01 22:39:39	6.68	9.24	4.25922	-6.80938	-9.41896	2012-11-01 22:39:39
2012-11-01 22:49:39	6.68	9.26	4.26617	-6.80938	-9.43935
2012-11-01 22:59:39	6.71	9.28	4.27311	-6.83996	-9.45973
2012-11-01 23:09:39	6.74	9.31	4.28006	-6.87054	-9.49032
2012-11-01 23:19:39	6.75	9.33	4.287	-6.88073	-9.5107
2012-11-01 23:29:39	6.78	9.36	4.29395	-6.91131	-9.54128
2012-11-01 23:39:39	6.79	9.37	4.30089	-6.92151	-9.55148	2012-11-01 23:39:39
2012-11-01 23:49:39	6.81	9.39	4.30784	-6.9419	-9.57187
2012-11-01 23:59:39	6.84	9.42	4.31478	-6.97248	-9.60245
2012-11-02 00:09:39	6.86	9.44	4.32172	-6.99286	-9.62283
2012-11-02 00:19:39	6.87	9.46	4.32867	-7.00306	-9.64322
2012-11-02 00:29:39	6.9	9.49	4.33561	-7.03364	-9.6738
2012-11-02 00:39:39	6.91	9.51	4.34256	-7.04383	-9.69419	2012-11-02 00:39:39
2012-11-02 00:49:39	6.91	9.5	4.3495	-7.04383	-9.684
2012-11-02 00:59:39	6.93	9.51	4.35645	-7.06422	-9.69419
2012-11-02 01:09:39	6.94	9.54	4.36339	-7.07441	-9.72477
2012-11-02 01:19:39	6.97	9.56	4.37034	-7.10499	-9.74516
2012-11-02 01:29:39	6.98	9.57	4.37728	-7.11519	-9.75535
2012-11-02 01:39:39	7	9.6	4.38422	-7.13558	-9.78593	2012-11-02 01:39:39
2012-11-02 01:49:39	7.01	9.61	4.39117	-7.14577	-9.79613
2012-11-02 01:59:39	7.03	9.63	4.39811	-7.16616	-9.81651
2012-11-02 02:09:39	7.04	9.64	4.40506	-7.17635	-9.82671
2012-11-02 02:19:39	7.07	9.67	4.412	-7.20693	-9.85729
2012-11-02 02:29:39	7.07	9.68	4.41895	-7.20693	-9.86748
2012-11-02 02:39:39	7.1	9.7	4.42589	-7.23751	-9.88787	2012-11-02 02:39:39
2012-11-02 02:49:39	7.1	9.7	4.43284	-7.23751	-9.88787
2012-11-02 02:59:39	7.14	9.74	4.43978	-7.27829	-9.92864
2012-11-02 03:09:39	7.16	9.76	4.44672	-7.29867	-9.94903
2012-11-02 03:19:39	7.18	9.78	4.45367	-7.31906	-9.96942
2012-11-02 03:29:39	7.21	9.81	4.46061	-7.34964	-10
2012-11-02 03:39:39	7.24	9.84	4.46756	-7.38022	-10.0306	2012-11-02 03:39:39
2012-11-02 03:49:39	7.25	9.86	4.4745	-7.39042	-10.051
2012-11-02 03:59:39	7.28	9.88	4.48145	-7.421	-10.0714
2012-11-02 04:09:39	7.27	9.88	4.48839	-7.41081	-10.0714
2012-11-02 04:19:39	7.31	9.92	4.49534	-7.45158	-10.1121
2012-11-02 04:29:39	7.34	9.95	4.50228	-7.48216	-10.1427
2012-11-02 04:39:39	7.36	9.99	4.50922	-7.50255	-10.1835	2012-11-02 04:39:39
2012-11-02 04:49:39	7.39	9.99	4.51617	-7.53313	-10.1835
2012-11-02 04:59:39	7.4	10.01	4.52311	-7.54332	-10.2039
2012-11-02 05:09:39	7.43	10.03	4.53006	-7.5739	-10.2243
2012-11-02 05:19:39	7.45	10.05	4.537	-7.59429	-10.2446
2012-11-02 05:29:39	7.47	10.08	4.54395	-7.61468	-10.2752
2012-11-02 05:39:39	7.47	10.09	4.55089	-7.61468	-10.2854	2012-11-02 05:39:39
2012-11-02 05:49:39	7.5	10.11	4.55784	-7.64526	-10.3058
2012-11-02 05:59:39	7.53	10.13	4.56478	-7.67584	-10.3262
2012-11-02 06:09:39	7.55	10.16	4.57172	-7.69623	-10.3568
2012-11-02 06:19:39	7.57	10.17	4.57867	-7.71662	-10.367
2012-11-02 06:29:39	7.6	10.21	4.58561	-7.7472	-10.4077
2012-11-02 06:39:39	7.63	10.23	4.59256	-7.77778	-10.4281	2012-11-02 06:39:39
2012-11-02 06:49:39	7.66	10.26	4.5995	-7.80836	-10.4587
2012-11-02 06:59:39	7.67	10.28	4.60645	-7.81855	-10.4791
2012-11-02 07:09:39	7.67	10.28	4.61339	-7.81855	-10.4791
2012-11-02 07:19:39	7.7	10.31	4.62034	-7.84913	-10.5097
2012-11-02 07:29:39	7.73	10.33	4.62728	-7.87971	-10.5301
2012-11-02 07:39:39	7.75	10.36	4.63422	-7.9001	-10.5607	2012-11-02 07:39:39
2012-11-02 07:49:39	7.77	10.39	4.64117	-7.92049	-10.5912
2012-11-02 07:59:39	7.77	10.4	4.64811	-7.92049	-10.6014
2012-11-02 08:09:39	7.8	10.43	4.65506	-7.95107	-10.632
2012-11-02 08:19:39	7.82	10.44	4.662	-7.97146	-10.6422
2012-11-02 08:29:39	7.83	10.46	4.66895	-7.98165	-10.6626
2012-11-02 08:39:39	7.86	10.47	4.67589	-8.01223	-10.6728	2012-11-02 08:39:39
2012-11-02 08:49:39	7.88	10.51	4.68284	-8.03262	-10.7136
2012-11-02 08:59:39	7.91	10.53	4.68978	-8.0632	-10.7339
2012-11-02 09:09:39	7.94	10.56	4.69672	-8.09378	-10.7645
2012-11-02 09:19:39	7.93	10.57	4.70367	-8.08359	-10.7747
2012-11-02 09:29:39	7.97	10.6	4.71061	-8.12436	-10.8053
2012-11-02 09:39:39	8.01	10.62	4.71756	-8.16514	-10.8257	2012-11-02 09:39:39
2012-11-02 09:49:39	8.02	10.64	4.7245	-8.17533	-10.8461
2012-11-02 09:59:39	8.03	10.65	4.73145	-8.18552	-10.8563
2012-11-02 10:09:39	8.05	10.68	4.73839	-8.20591	-10.8869
2012-11-02 10:19:39	8.07	10.71	4.74534	-8.2263	-10.9174
2012-11-02 10:29:39	8.09	10.73	4.75228	-8.24669	-10.9378
2012-11-02 10:39:39	8.12	10.75	4.75922	-8.27727	-10.9582	2012-11-02 10:39:39
2012-11-02 10:49:39	8.15	10.77	4.76617	-8.30785	-10.9786
2012-11-02 10:59:39	7.96	10.8	4.77311	-8.11417	-11.0092
2012-11-02 11:09:39	8.21	10.86	4.78006	-8.36901	-11.0703
2012-11-02 11:19:39	8.24	10.87	4.787	-8.39959	-11.0805
2012-11-02 11:29:39	8.28	10.91	4.79395	-8.44037	-11.1213
2012-11-02 11:39:39	8.28	10.92	4.80089	-8.44037	-11.1315	2012-11-02 11:39:39
2012-11-02 11:49:39	8.31	10.96	4.80784	-8.47095	-11.1723
2012-11-02 11:59:39	8.35	10.99	4.81478	-8.51172	-11.2029
2012-11-02 12:09:39	8.35	10.99	4.82172	-8.51172	-11.2029
2012-11-02 12:19:39	8.37	11.03	4.82867	-8.53211	-11.2436
2012-11-02 12:29:39	8.4	11.05	4.83561	-8.56269	-11.264
2012-11-02 12:39:39	8.42	11.07	4.84256	-8.58308	-11.2844	2012-11-02 12:39:39
2012-11-02 12:49:39	8.44	11.08	4.8495	-8.60347	-11.2946
2012-11-02 12:59:39	8.46	11.11	4.85645	-8.62385	-11.3252
2012-11-02 13:09:39	8.48	11.14	4.86339	-8.64424	-11.3558
2012-11-02 13:19:39	8.52	11.16	4.87034	-8.68502	-11.3761
2012-11-02 13:29:39	8.53	11.19	4.87728	-8.69521	-11.4067
2012-11-02 13:39:39	8.55	11.2	4.88422	-8.7156	-11.4169	2012-11-02 13:39:39
2012-11-02 13:49:39	8.58	11.24	4.89117	-8.74618	-11.4577
2012-11-02 13:59:39	8.6	11.25	4.89811	-8.76656	-11.4679
2012-11-02 14:09:39	8.64	11.29	4.90506	-8.80734	-11.5087
2012-11-02 14:19:39	8.66	11.31	4.912	-8.82773	-11.5291
2012-11-02 14:29:39	8.68	11.34	4.91895	-8.84811	-11.5596
2012-11-02 14:39:39	8.7	11.36	4.92589	-8.8685	-11.58	2012-11-02 14:39:39
2012-11-02 14:49:39	8.73	11.39	4.93284	-8.89908	-11.6106
2012-11-02 14:59:39	8.76	11.42	4.93978	-8.92966	-11.6412
2012-11-02 15:09:39	8.79	11.45	4.94672	-8.96024	-11.6718
2012-11-02 15:19:39	8.48	11.13	4.95367	-8.64424	-11.3456
2012-11-02 15:29:39	8.6	11.27	4.96061	-8.76656	-11.4883
2012-11-02 15:39:39	8.7	11.35	4.96756	-8.8685	-11.5698	2012-11-02 15:39:39
2012-11-02 15:49:39	8.77	11.42	4.9745	-8.93986	-11.6412
2012-11-02 15:59:39	8.81	11.46	4.98145	-8.98063	-11.682
2012-11-02 16:09:39	8.85	11.49	4.98839	-9.02141	-11.7125
2012-11-02 16:19:39	8.89	11.53	4.99534	-9.06218	-11.7533
2012-11-02 16:29:39	8.92	11.56	5.00228	-9.09276	-11.7839
2012-11-02 16:39:39	8.94	11.59	5.00922	-9.11315	-11.8145	2012-11-02 16:39:39
2012-11-02 16:49:39	8.97	11.62	5.01617	-9.14373	-11.8451
2012-11-02 16:59:39	9.01	11.64	5.02311	-9.18451	-11.8654
2012-11-02 17:09:39	9.04	11.68	5.03006	-9.21509	-11.9062
2012-11-02 17:19:39	9.1	11.72	5.037	-9.27625	-11.947
2012-11-02 17:29:39	9.11	11.75	5.04395	-9.28644	-11.9776
2012-11-02 17:39:39	9.14	11.78	5.05089	-9.31702	-12.0082	2012-11-02 17:39:39
2012-11-02 17:49:39	9.18	11.83	5.05784	-9.3578	-12.0591
2012-11-02 17:59:39	9.22	11.86	5.06478	-9.39857	-12.0897
2012-11-02 18:09:39	9.24	11.89	5.07172	-9.41896	-12.1203
2012-11-02 18:19:39	9.28	11.93	5.07867	-9.45973	-12.1611
2012-11-02 18:29:39	9.32	11.96	5.08561	-9.50051	-12.1916
2012-11-02 18:39:39	9.36	12.01	5.09256	-9.54128	-12.2426	2012-11-02 18:39:39
2012-11-02 18:49:39	9.39	12.04	5.0995	-9.57187	-12.2732
2012-11-02 18:59:39	9.42	12.07	5.10645	-9.60245	-12.3038
2012-11-02 19:09:39	9.44	12.1	5.11339	-9.62283	-12.3344
2012-11-02 19:19:39	9.49	12.14	5.12034	-9.6738	-12.3751
2012-11-02 19:29:39	9.51	12.18	5.12728	-9.69419	-12.4159
2012-11-02 19:39:39	9.56	12.22	5.13422	-9.74516	-12.4567	2012-11-02 19:39:39
2012-11-02 19:49:39	9.58	12.24	5.14117	-9.76555	-12.4771
2012-11-02 19:59:39	9.61	12.28	5.14811	-9.79613	-12.5178
2012-11-02 20:09:39	9.65	12.31	5.15506	-9.8369	-12.5484
2012-11-02 20:19:39	9.62	12.3	5.162	-9.80632	-12.5382
2012-11-02 20:29:39	9.67	12.34	5.16895	-9.85729	-12.579
2012-11-02 20:39:39	9.7	12.38	5.17589	-9.88787	-12.6198	2012-11-02 20:39:39
2012-11-02 20:49:39	9.69	12.36	5.18284	-9.87768	-12.5994
2012-11-02 20:59:39	9.75	12.42	5.18978	-9.93884	-12.6606
2012-11-02 21:09:39	9.79	12.46	5.19672	-9.97961	-12.7013
2012-11-02 21:19:39	9.82	12.51	5.20367	-10.0102	-12.7523
2012-11-02 21:29:39	9.85	12.54	5.21061	-10.0408	-12.7829
2012-11-02 21:39:39	9.89	12.57	5.21756	-10.0815	-12.8135	2012-11-02 21:39:39
2012-11-02 21:49:39	9.91	12.6	5.2245	-10.1019	-12.844
2012-11-02 21:59:39	9.96	12.64	5.23145	-10.1529	-12.8848
2012-11-02 22:09:39	9.98	12.67	5.23839	-10.1733	-12.9154
2012-11-02 22:19:39	10.01	12.7	5.24534	-10.2039	-12.946
2012-11-02 22:29:39	10.05	12.73	5.25228	-10.2446	-12.9766
2012-11-02 22:39:39	10.08	12.77	5.25922	-10.2752	-13.0173	2012-11-02 22:39:39
2012-11-02 22:49:39	10.11	12.8	5.26617	-10.3058	-13.0479
2012-11-02 22:59:39	10.15	12.83	5.27311	-10.3466	-13.0785
2012-11-02 23:09:39	10.19	12.86	5.28006	-10.3874	-13.1091
2012-11-02 23:19:39	10.22	12.89	5.287	-10.4179	-13.1397
2012-11-02 23:29:39	10.25	12.93	5.29395	-10.4485	-13.1804
2012-11-02 23:39:39	10.29	12.97	5.30089	-10.4893	-13.2212	2012-11-02 23:39:39
2012-11-02 23:49:39	10.31	12.99	5.30784	-10.5097	-13.2416
2012-11-02 23:59:39	10.35	13.03	5.31478	-10.5505	-13.2824
2012-11-03 00:09:39	10.38	13.06	5.32172	-10.581	-13.3129
2012-11-03 00:19:39	10.41	13.09	5.32867	-10.6116	-13.3435
2012-11-03 00:29:39	10.44	13.13	5.33561	-10.6422	-13.3843
2012-11-03 00:39:39	10.47	13.16	5.34256	-10.6728	-13.4149	2012-11-03 00:39:39
2012-11-03 00:49:39	10.5	13.19	5.3495	-10.7034	-13.4455
2012-11-03 00:59:39	10.53	13.22	5.35645	-10.7339	-13.476
2012-11-03 01:09:39	10.56	13.24	5.36339	-10.7645	-13.4964
2012-11-03 01:19:39	10.6	13.28	5.37034	-10.8053	-13.5372
2012-11-03 01:29:39	10.63	13.31	5.37728	-10.8359	-13.5678
2012-11-03 01:39:39	10.66	13.35	5.38422	-10.8665	-13.6086	2012-11-03 01:39:39
2012-11-03 01:49:39	10.7	13.39	5.39117	-10.9072	-13.6493
2012-11-03 01:59:39	10.73	13.43	5.39811	-10.9378	-13.6901
2012-11-03 02:09:39	10.78	13.47	5.40506	-10.9888	-13.7309
2012-11-03 02:19:39	10.8	13.5	5.412	-11.0092	-13.7615
2012-11-03 02:29:39	10.83	13.52	5.41895	-11.0398	-13.7819
2012-11-03 02:39:39	10.87	13.56	5.42589	-11.0805	-13.8226	2012-11-03 02:39:39
2012-11-03 02:49:39	10.9	13.59	5.43284	-11.1111	-13.8532
2012-11-03 02:59:39	10.93	13.63	5.43978	-11.1417	-13.894
2012-11-03 03:09:39	10.96	13.66	5.44672	-11.1723	-13.9246
2012-11-03 03:19:39	11	13.69	5.45367	-11.213	-13.9551
2012-11-03 03:29:39	11.02	13.71	5.46061	-11.2334	-13.9755
2012-11-03 03:39:39	11.06	13.76	5.46756	-11.2742	-14.0265	2012-11-03 03:39:39
2012-11-03 03:49:39	11.1	13.79	5.4745	-11.315	-14.0571
2012-11-03 03:59:39	11.14	13.83	5.48145	-11.3558	-14.0979
2012-11-03 04:09:39	11.17	13.86	5.48839	-11.3863	-14.1284
2012-11-03 04:19:39	11.2	13.89	5.49534	-11.4169	-14.159
2012-11-03 04:29:39	11.24	13.93	5.50228	-11.4577	-14.1998
2012-11-03 04:39:39	11.26	13.95	5.50922	-11.4781	-14.2202	2012-11-03 04:39:39
2012-11-03 04:49:39	11.3	13.98	5.51617	-11.5189	-14.2508
2012-11-03 04:59:39	11.34	14.03	5.52311	-11.5596	-14.3017
2012-11-03 05:09:39	11.37	14.07	5.53006	-11.5902	-14.3425
2012-11-03 05:19:39	11.41	14.11	5.537	-11.631	-14.3833
2012-11-03 05:29:39	11.44	14.14	5.54395	-11.6616	-14.4139
2012-11-03 05:39:39	11.47	14.17	5.55089	-11.6922	-14.4444	2012-11-03 05:39:39
2012-11-03 05:49:39	11.5	14.2	5.55784	-11.7227	-14.475
2012-11-03 05:59:39	11.54	14.24	5.56478	-11.7635	-14.5158
2012-11-03 06:09:39	11.58	14.28	5.57172	-11.8043	-14.5566
2012-11-03 06:19:39	11.59	14.29	5.57867	-11.8145	-14.5668
2012-11-03 06:29:39	11.63	14.33	5.58561	-11.8552	-14.6075
2012-11-03 06:39:39	11.67	14.37	5.59256	-11.896	-14.6483	2012-11-03 06:39:39
2012-11-03 06:49:39	11.71	14.41	5.5995	-11.9368	-14.6891
2012-11-03 06:59:39	11.74	14.45	5.60645	-11.9674	-14.7299
2012-11-03 07:09:39	11.78	14.48	5.61339	-12.0082	-14.7604
2012-11-03 07:19:39	11.81	14.51	5.62034	-12.0387	-14.791
2012-11-03 07:29:39	11.84	14.54	5.62728	-12.0693	-14.8216
2012-11-03 07:39:39	11.88	14.59	5.63422	-12.1101	-14.8726	2012-11-03 07:39:39
2012-11-03 07:49:39	11.92	14.63	5.64117	-12.1509	-14.9134
2012-11-03 07:59:39	11.96	14.66	5.64811	-12.1916	-14.9439
2012-11-03 08:09:39	12	14.7	5.65506	-12.2324	-14.9847
2012-11-03 08:19:39	12	14.72	5.662	-12.2324	-15.0051
2012-11-03 08:29:39	12.05	14.75	5.66895	-12.2834	-15.0357
2012-11-03 08:39:39	12.08	14.79	5.67589	-12.314	-15.0765	2012-11-03 08:39:39
2012-11-03 08:49:39	12.12	14.82	5.68284	-12.3547	-15.107
2012-11-03 08:59:39	12.15	14.86	5.68978	-12.3853	-15.1478
2012-11-03 09:09:39	12.2	14.9	5.69672	-12.4363	-15.1886
2012-11-03 09:19:39	12.23	14.93	5.70367	-12.4669	-15.2192
2012-11-03 09:29:39	12.26	14.97	5.71061	-12.4975	-15.2599
2012-11-03 09:39:39	12.3	15	5.71756	-12.5382	-15.2905	2012-11-03 09:39:39
2012-11-03 09:49:39	12.32	15.03	5.7245	-12.5586	-15.3211
2012-11-03 09:59:39	12.36	15.07	5.73145	-12.5994	-15.3619
2012-11-03 10:09:39	12.42	15.11	5.73839	-12.6606	-15.4027
2012-11-03 10:19:39	12.44	15.15	5.74534	-12.6809	-15.4434
2012-11-03 10:29:39	12.45	15.16	5.75228	-12.6911	-15.4536
2012-11-03 10:39:39	12.51	15.22	5.75922	-12.7523	-15.5148	2012-11-03 10:39:39
2012-11-03 10:49:39	12.53	15.25	5.76617	-12.7727	-15.5454
2012-11-03 10:59:39	12.57	15.29	5.77311	-12.8135	-15.5861
2012-11-03 11:09:39	12.6	15.32	5.78006	-12.844	-15.6167
2012-11-03 11:19:39	12.64	15.36	5.787	-12.8848	-15.6575
2012-11-03 11:29:39	12.67	15.39	5.79395	-12.9154	-15.6881
2012-11-03 11:39:39	12.7	15.43	5.80089	-12.946	-15.7288	2012-11-03 11:39:39
2012-11-03 11:49:39	12.75	15.47	5.80784	-12.9969	-15.7696
2012-11-03 11:59:39	12.78	15.51	5.81478	-13.0275	-15.8104
2012-11-03 12:09:39	12.81	15.54	5.82172	-13.0581	-15.841
2012-11-03 12:19:39	12.85	15.58	5.82867	-13.0989	-15.8818
2012-11-03 12:29:39	12.87	15.59	5.83561	-13.1193	-15.8919
2012-11-03 12:39:39	12.9	15.63	5.84256	-13.1498	-15.9327	2012-11-03 12:39:39
2012-11-03 12:49:39	12.95	15.67	5.8495	-13.2008	-15.9735
2012-11-03 12:59:39	12.98	15.71	5.85645	-13.2314	-16.0143
2012-11-03 13:09:39	13.01	15.74	5.86339	-13.262	-16.0449
2012-11-03 13:19:39	13.05	15.77	5.87034	-13.3028	-16.0754
2012-11-03 13:29:39	13.08	15.8	5.87728	-13.3333	-16.106
2012-11-03 13:39:39	13.12	15.84	5.88422	-13.3741	-16.1468	2012-11-03 13:39:39
2012-11-03 13:49:39	13.15	15.89	5.89117	-13.4047	-16.1978
2012-11-03 13:59:39	13.19	15.92	5.89811	-13.4455	-16.2283
2012-11-03 14:09:39	13.22	15.95	5.90506	-13.476	-16.2589
2012-11-03 14:19:39	13.26	15.98	5.912	-13.5168	-16.2895
2012-11-03 14:29:39	13.29	16.03	5.91895	-13.5474	-16.3405
2012-11-03 14:39:39	13.32	16.06	5.92589	-13.578	-16.371	2012-11-03 14:39:39
2012-11-03 14:49:39	13.37	16.11	5.93284	-13.629	-16.422
2012-11-03 14:59:39	13.4	16.13	5.93978	-13.6595	-16.4424
2012-11-03 15:09:39	13.43	16.17	5.94672	-13.6901	-16.4832
2012-11-03 15:19:39	13.47	16.2	5.95367	-13.7309	-16.5138
2012-11-03 15:29:39	13.49	16.25	5.96061	-13.7513	-16.5647
2012-11-03 15:39:39	13.52	16.27	5.96756	-13.7819	-16.5851	2012-11-03 15:39:39
2012-11-03 15:49:39	13.55	16.31	5.9745	-13.8124	-16.6259
2012-11-03 15:59:39	13.28	16.05	5.98145	-13.5372	-16.3609
2012-11-03 16:09:39	13.44	16.19	5.98839	-13.7003	-16.5036
2012-11-03 16:19:39	13.55	16.3	5.99534	-13.8124	-16.6157
2012-11-03 16:29:39	13.61	16.34	6.00228	-13.8736	-16.6565
2012-11-03 16:39:39	13.65	16.39	6.00922	-13.9144	-16.7074	2012-11-03 16:39:39
2012-11-03 16:49:39	13.7	16.43	6.01617	-13.9653	-16.7482
2012-11-03 16:59:39	13.74	16.47	6.02311	-14.0061	-16.789
2012-11-03 17:09:39	13.78	16.51	6.03006	-14.0469	-16.8298
2012-11-03 17:19:39	13.83	16.56	6.037	-14.0979	-16.8807
2012-11-03 17:29:39	13.87	16.6	6.04395	-14.1386	-16.9215
2012-11-03 17:39:39	13.9	16.63	6.05089	-14.1692	-16.9521	2012-11-03 17:39:39
2012-11-03 17:49:39	13.94	16.66	6.05784	-14.21	-16.9827
2012-11-03 17:59:39	13.98	16.7	6.06478	-14.2508	-17.0234
2012-11-03 18:09:39	14.02	16.76	6.07172	-14.2915	-17.0846
2012-11-03 18:19:39	14.07	16.8	6.07867	-14.3425	-17.1254
2012-11-03 18:29:39	14.09	16.81	6.08561	-14.3629	-17.1356
2012-11-03 18:39:39	14.13	16.87	6.09256	-14.4037	-17.1967	2012-11-03 18:39:39
2012-11-03 18:49:39	14.19	16.91	6.0995	-14.4648	-17.2375
2012-11-03 18:59:39	14.22	16.95	6.10645	-14.4954	-17.2783
2012-11-03 19:09:39	14.27	16.99	6.11339	-14.5464	-17.3191
2012-11-03 19:19:39	14.27	17.03	6.12034	-14.5464	-17.3598
2012-11-03 19:29:39	14.34	17.08	6.12728	-14.6177	-17.4108
2012-11-03 19:39:39	14.38	17.12	6.13422	-14.6585	-17.4516	2012-11-03 19:39:39
2012-11-03 19:49:39	14.42	17.15	6.14117	-14.6993	-17.4822
2012-11-03 19:59:39	14.47	17.2	6.14811	-14.7503	-17.5331
2012-11-03 20:09:39	14.5	17.23	6.15506	-14.7808	-17.5637
2012-11-03 20:19:39	14.54	17.27	6.162	-14.8216	-17.6045
2012-11-03 20:29:39	14.58	17.31	6.16895	-14.8624	-17.6453
2012-11-03 20:39:39	14.62	17.36	6.17589	-14.9032	-17.6962	2012-11-03 20:39:39
2012-11-03 20:49:39	14.67	17.41	6.18284	-14.9541	-17.7472
2012-11-03 20:59:39	14.71	17.45	6.18978	-14.9949	-17.788
2012-11-03 21:09:39	14.76	17.49	6.19672	-15.0459	-17.8287
2012-11-03 21:19:39	14.8	17.54	6.20367	-15.0866	-17.8797
2012-11-03 21:29:39	14.85	17.59	6.21061	-15.1376	-17.9307
2012-11-03 21:39:39	14.89	17.64	6.21756	-15.1784	-17.9817	2012-11-03 21:39:39
2012-11-03 21:49:39	14.93	17.68	6.2245	-15.2192	-18.0224
2012-11-03 21:59:39	14.97	17.72	6.23145	-15.2599	-18.0632
2012-11-03 22:09:39	15.02	17.76	6.23839	-15.3109	-18.104
2012-11-03 22:19:39	15.05	17.8	6.24534	-15.3415	-18.1448
2012-11-03 22:29:39	15.1	17.84	6.25228	-15.3925	-18.1855
2012-11-03 22:39:39	15.14	17.89	6.25922	-15.4332	-18.2365	2012-11-03 22:39:39
2012-11-03 22:49:39	15.19	17.93	6.26617	-15.4842	-18.2773
2012-11-03 22:59:39	15.23	17.97	6.27311	-15.525	-18.318
2012-11-03 23:09:39	15.27	18.02	6.28006	-15.5657	-18.369
2012-11-03 23:19:39	15.31	18.07	6.287	-15.6065	-18.42
2012-11-03 23:29:39	15.36	18.11	6.29395	-15.6575	-18.4608
2012-11-03 23:39:39	15.4	18.15	6.30089	-15.6983	-18.5015	2012-11-03 23:39:39
2012-11-03 23:49:39	15.43	18.18	6.30784	-15.7288	-18.5321
2012-11-03 23:59:39	15.47	18.22	6.31478	-15.7696	-18.5729
2012-11-04 00:09:39	15.51	18.27	6.32172	-15.8104	-18.6239
2012-11-04 00:19:39	15.56	18.31	6.32867	-15.8614	-18.6646
2012-11-04 00:29:39	15.6	18.35	6.33561	-15.9021	-18.7054
2012-11-04 00:39:39	15.64	18.39	6.34256	-15.9429	-18.7462	2012-11-04 00:39:39
2012-11-04 00:49:39	15.67	18.43	6.3495	-15.9735	-18.787
2012-11-04 00:59:39	15.72	18.47	6.35645	-16.0245	-18.8277
2012-11-04 01:09:39	15.76	18.52	6.36339	-16.0652	-18.8787
2012-11-04 01:19:39	15.8	18.55	6.37034	-16.106	-18.9093
2012-11-04 01:29:39	15.85	18.59	6.37728	-16.157	-18.9501
2012-11-04 01:39:39	15.9	18.64	6.38422	-16.208	-19.001	2012-11-04 01:39:39
2012-11-04 01:49:39	15.94	18.69	6.39117	-16.2487	-19.052
2012-11-04 01:59:39	15.97	18.73	6.39811	-16.2793	-19.0928
2012-11-04 02:09:39	16.01	18.77	6.40506	-16.3201	-19.1335
2012-11-04 02:19:39	16.06	18.82	6.412	-16.371	-19.1845
2012-11-04 02:29:39	16.1	18.85	6.41895	-16.4118	-19.2151
2012-11-04 02:39:39	16.15	18.9	6.42589	-16.4628	-19.2661	2012-11-04 02:39:39
2012-11-04 02:49:39	16.18	18.93	6.43284	-16.4934	-19.2966
2012-11-04 02:59:39	16.22	18.98	6.43978	-16.5341	-19.3476
2012-11-04 03:09:39	16.27	19.02	6.44672	-16.5851	-19.3884
2012-11-04 03:19:39	16.32	19.07	6.45367	-16.6361	-19.4393
2012-11-04 03:29:39	16.35	19.12	6.46061	-16.6667	-19.4903
2012-11-04 03:39:39	16.4	19.15	6.46756	-16.7176	-19.5209	2012-11-04 03:39:39
2012-11-04 03:49:39	16.45	19.2	6.4745	-16.7686	-19.5719
2012-11-04 03:59:39	16.49	19.24	6.48145	-16.8094	-19.6126
2012-11-04 04:09:39	16.52	19.29	6.48839	-16.84	-19.6636
2012-11-04 04:19:39	16.58	19.34	6.49534	-16.9011	-19.7146
2012-11-04 04:29:39	16.61	19.37	6.50228	-16.9317	-19.7452
2012-11-04 04:39:39	16.66	19.43	6.50922	-16.9827	-19.8063	2012-11-04 04:39:39
2012-11-04 04:49:39	16.71	19.47	6.51617	-17.0336	-19.8471
2012-11-04 04:59:39	16.76	19.52	6.52311	-17.0846	-19.8981
2012-11-04 05:09:39	16.81	19.57	6.53006	-17.1356	-19.949
2012-11-04 05:19:39	16.85	19.61	6.537	-17.1764	-19.9898
2012-11-04 05:29:39	16.9	19.66	6.54395	-17.2273	-20.0408
2012-11-04 05:39:39	16.94	19.7	6.55089	-17.2681	-20.0815	2012-11-04 05:39:39
2012-11-04 05:49:39	16.99	19.75	6.55784	-17.3191	-20.1325
2012-11-04 05:59:39	17.04	19.8	6.56478	-17.37	-20.1835
2012-11-04 06:09:39	17.09	19.85	6.57172	-17.421	-20.2345
2012-11-04 06:19:39	17.14	19.9	6.57867	-17.472	-20.2854
2012-11-04 06:29:39	17.18	19.94	6.58561	-17.5127	-20.3262
2012-11-04 06:39:39	17.22	19.99	6.59256	-17.5535	-20.3772	2012-11-04 06:39:39
2012-11-04 06:49:39	17.26	20.03	6.5995	-17.5943	-20.4179
2012-11-04 06:59:39	17.3	20.07	6.60645	-17.6351	-20.4587
2012-11-04 07:09:39	17.35	20.12	6.61339	-17.686	-20.5097
2012-11-04 07:19:39	17.4	20.17	6.62034	-17.737	-20.5607
2012-11-04 07:29:39	17.45	20.22	6.62728	-17.788	-20.6116
2012-11-04 07:39:39	17.48	20.26	6.63422	-17.8186	-20.6524	2012-11-04 07:39:39
2012-11-04 07:49:39	17.55	20.31	6.64117	-17.8899	-20.7034
2012-11-04 07:59:39	17.6	20.36	6.64811	-17.9409	-20.7543
2012-11-04 08:09:39	17.64	20.42	6.65506	-17.9817	-20.8155
2012-11-04 08:19:39	17.69	20.46	6.662	-18.0326	-20.8563
2012-11-04 08:29:39	17.74	20.5	6.66895	-18.0836	-20.897
2012-11-04 08:39:39	17.78	20.55	6.67589	-18.1244	-20.948	2012-11-04 08:39:39
2012-11-04 08:49:39	17.83	20.6	6.68284	-18.1753	-20.999
2012-11-04 08:59:39	17.88	20.65	6.68978	-18.2263	-21.0499
2012-11-04 09:09:39	17.92	20.7	6.69672	-18.2671	-21.1009
2012-11-04 09:19:39	17.96	20.74	6.70367	-18.3078	-21.1417
2012-11-04 09:29:39	18.01	20.78	6.71061	-18.3588	-21.1825
2012-11-04 09:39:39	18.06	20.83	6.71756	-18.4098	-21.2334	2012-11-04 09:39:39
2012-11-04 09:49:39	18.13	20.9	6.7245	-18.4811	-21.3048
2012-11-04 09:59:39	18.17	20.94	6.73145	-18.5219	-21.3456
2012-11-04 10:09:39	18.22	20.99	6.73839	-18.5729	-21.3965
2012-11-04 10:19:39	18.27	21.05	6.74534	-18.6239	-21.4577
2012-11-04 10:29:39	18.32	21.09	6.75228	-18.6748	-21.4985
2012-11-04 10:39:39	18.36	21.14	6.75922	-18.7156	-21.5494	2012-11-04 10:39:39
2012-11-04 10:49:39	18.42	21.18	6.76617	-18.7768	-21.5902
2012-11-04 10:59:39	18.47	21.24	6.77311	-18.8277	-21.6514
2012-11-04 11:09:39	18.51	21.29	6.78006	-18.8685	-21.7023
2012-11-04 11:19:39	18.46	21.25	6.787	-18.8175	-21.6616
2012-11-04 11:29:39	18.58	21.37	6.79395	-18.9399	-21.7839
2012-11-04 11:39:39	18.66	21.43	6.80089	-19.0214	-21.8451	2012-11-04 11:39:39
2012-11-04 11:49:39	18.7	21.47	6.80784	-19.0622	-21.8858
2012-11-04 11:59:39	18.75	21.51	6.81478	-19.1131	-21.9266
2012-11-04 12:09:39	18.8	21.55	6.82172	-19.1641	-21.9674
2012-11-04 12:19:39	18.83	21.61	6.82867	-19.1947	-22.0285
2012-11-04 12:29:39	18.89	21.65	6.83561	-19.2559	-22.0693
2012-11-04 12:39:39	18.93	21.71	6.84256	-19.2966	-22.1305	2012-11-04 12:39:39
2012-11-04 12:49:39	18.99	21.74	6.8495	-19.3578	-22.1611
2012-11-04 12:59:39	19.03	21.8	6.85645	-19.3986	-22.2222
2012-11-04 13:09:39	19.08	21.84	6.86339	-19.4495	-22.263
2012-11-04 13:19:39	19.12	21.89	6.87034	-19.4903	-22.314
2012-11-04 13:29:39	19.18	21.95	6.87728	-19.5515	-22.3751
2012-11-04 13:39:39	19.23	22	6.88422	-19.6024	-22.4261	2012-11-04 13:39:39
2012-11-04 13:49:39	19.28	22.03	6.89117	-19.6534	-22.4567
2012-11-04 13:59:39	19.32	22.08	6.89811	-19.6942	-22.5076
2012-11-04 14:09:39	19.36	22.13	6.90506	-19.735	-22.5586
2012-11-04 14:19:39	19.41	22.18	6.912	-19.7859	-22.6096
2012-11-04 14:29:39	19.47	22.23	6.91895	-19.8471	-22.6606
2012-11-04 14:39:39	19.52	22.28	6.92589	-19.8981	-22.7115	2012-11-04 14:39:39
2012-11-04 14:49:39	19.57	22.34	6.93284	-19.949	-22.7727
2012-11-04 14:59:39	19.62	22.39	6.93978	-20	-22.8236
2012-11-04 15:09:39	19.68	22.45	6.94672	-20.0612	-22.8848
2012-11-04 15:19:39	19.73	22.5	6.95367	-20.1121	-22.9358
2012-11-04 15:29:39	19.78	22.55	6.96061	-20.1631	-22.9867
2012-11-04 15:39:39	19.82	22.6	6.96756	-20.2039	-23.0377	2012-11-04 15:39:39
2012-11-04 15:49:39	19.47	22.3	6.9745	-19.8471	-22.7319
2012-11-04 15:59:39	19.47	22.29	6.98145	-19.8471	-22.7217
2012-11-04 16:09:39	19.71	22.51	6.98839	-20.0917	-22.946
2012-11-04 16:19:39	19.85	22.65	6.99534	-20.2345	-23.0887
2012-11-04 16:29:39	19.91	22.7	7.00228	-20.2956	-23.1397
2012-11-04 16:39:39	19.97	22.76	7.00922	-20.3568	-23.2008	2012-11-04 16:39:39
2012-11-04 16:49:39	20.03	22.81	7.01617	-20.4179	-23.2518
2012-11-04 16:59:39	20.07	22.88	7.02311	-20.4587	-23.3231
2012-11-04 17:09:39	20.15	22.93	7.03006	-20.5403	-23.3741
2012-11-04 17:19:39	20.21	22.99	7.037	-20.6014	-23.4353
2012-11-04 17:29:39	20.27	23.05	7.04395	-20.6626	-23.4964
2012-11-04 17:39:39	20.3	23.1	7.05089	-20.6932	-23.5474	2012-11-04 17:39:39
2012-11-04 17:49:39	20.37	23.16	7.05784	-20.7645	-23.6086
2012-11-04 17:59:39	20.42	23.21	7.06478	-20.8155	-23.6595
2012-11-04 18:09:39	20.47	23.26	7.07172	-20.8665	-23.7105
2012-11-04 18:19:39	20.53	23.31	7.07867	-20.9276	-23.7615
2012-11-04 18:29:39	20.58	23.38	7.08561	-20.9786	-23.8328
2012-11-04 18:39:39	20.63	23.42	7.09256	-21.0296	-23.8736	2012-11-04 18:39:39
2012-11-04 18:49:39	20.69	23.47	7.0995	-21.0907	-23.9246
2012-11-04 18:59:39	20.75	23.52	7.10645	-21.1519	-23.9755
2012-11-04 19:09:39	20.82	23.61	7.11339	-21.2232	-24.0673
2012-11-04 19:19:39	20.89	23.68	7.12034	-21.2946	-24.1386
2012-11-04 19:29:39	20.85	23.64	7.12728	-21.2538	-24.0979
2012-11-04 19:39:39	20.96	23.77	7.13422	-21.366	-24.2304	2012-11-04 19:39:39
2012-11-04 19:49:39	21.02	23.82	7.14117	-21.4271	-24.2813
2012-11-04 19:59:39	21.08	23.88	7.14811	-21.4883	-24.3425
2012-11-04 20:09:39	21.14	23.94	7.15506	-21.5494	-24.4037
2012-11-04 20:19:39	21.19	23.99	7.162	-21.6004	-24.4546
2012-11-04 20:29:39	21.24	24.04	7.16895	-21.6514	-24.5056
2012-11-04 20:39:39	21.32	24.11	7.17589	-21.7329	-24.577	2012-11-04 20:39:39
2012-11-04 20:49:39	21.37	24.16	7.18284	-21.7839	-24.6279
2012-11-04 20:59:39	21.43	24.23	7.18978	-21.8451	-24.6993
2012-11-04 21:09:39	21.48	24.28	7.19672	-21.896	-24.7503
2012-11-04 21:19:39	21.54	24.34	7.20367	-21.9572	-24.8114
2012-11-04 21:29:39	21.6	24.34	7.21061	-22.0183	-24.8114
2012-11-04 21:39:39	21.65	24.44	7.21756	-22.0693	-24.9134	2012-11-04 21:39:39
2012-11-04 21:49:39	21.71	24.51	7.2245	-22.1305	-24.9847
2012-11-04 21:59:39	21.77	24.57	7.23145	-22.1916	-25.0459
2012-11-04 22:09:39	21.81	24.63	7.23839	-22.2324	-25.107
2012-11-04 22:19:39	21.88	24.67	7.24534	-22.3038	-25.1478
2012-11-04 22:29:39	21.93	24.73	7.25228	-22.3547	-25.209
2012-11-04 22:39:39	21.99	24.79	7.25922	-22.4159	-25.2701	2012-11-04 22:39:39
2012-11-04 22:49:39	22.05	24.82	7.26617	-22.4771	-25.3007
2012-11-04 22:59:39	22.09	24.9	7.27311	-22.5178	-25.3823
2012-11-04 23:09:39	22.16	24.96	7.28006	-22.5892	-25.4434
2012-11-04 23:19:39	22.23	25.02	7.287	-22.6606	-25.5046
2012-11-04 23:29:39	22.26	25.07	7.29395	-22.6911	-25.5556
2012-11-04 23:39:39	22.34	25.14	7.30089	-22.7727	-25.6269	2012-11-04 23:39:39
2012-11-04 23:49:39	22.38	25.18	7.30784	-22.8135	-25.6677
2012-11-04 23:59:39	22.42	25.24	7.31478	-22.8542	-25.7288
2012-11-05 00:09:39	22.5	25.28	7.32172	-22.9358	-25.7696
2012-11-05 00:19:39	22.56	25.35	7.32867	-22.9969	-25.841
2012-11-05 00:29:39	22.62	25.42	7.33561	-23.0581	-25.9123
2012-11-05 00:39:39	22.68	25.47	7.34256	-23.1193	-25.9633	2012-11-05 00:39:39
2012-11-05 00:49:39	22.74	25.54	7.3495	-23.1804	-26.0347
2012-11-05 00:59:39	22.79	25.6	7.35645	-23.2314	-26.0958
2012-11-05 01:09:39	22.85	25.66	7.36339	-23.2926	-26.157
2012-11-05 01:19:39	22.92	25.71	7.37034	-23.3639	-26.208
2012-11-05 01:29:39	22.97	25.77	7.37728	-23.4149	-26.2691
2012-11-05 01:39:39	23.03	25.83	7.38422	-23.476	-26.3303	2012-11-05 01:39:39
2012-11-05 01:49:39	23.09	25.9	7.39117	-23.5372	-26.4016
2012-11-05 01:59:39	23.15	25.95	7.39811	-23.5984	-26.4526
2012-11-05 02:09:39	23.22	26.01	7.40506	-23.6697	-26.5138
2012-11-05 02:19:39	23.29	26.09	7.412	-23.7411	-26.5953
2012-11-05 02:29:39	23.35	26.14	7.41895	-23.8022	-26.6463
2012-11-05 02:39:39	23.4	26.19	7.42589	-23.8532	-26.6972	2012-11-05 02:39:39
2012-11-05 02:49:39	23.49	26.28	7.43284	-23.945	-26.789
2012-11-05 02:59:39	23.53	26.32	7.43978	-23.9857	-26.8298
2012-11-05 03:09:39	23.61	26.42	7.44672	-24.0673	-26.9317
2012-11-05 03:19:39	23.66	26.48	7.45367	-24.1182	-26.9929
2012-11-05 03:29:39	23.73	26.54	7.46061	-24.1896	-27.054
2012-11-05 03:39:39	23.79	26.6	7.46756	-24.2508	-27.1152	2012-11-05 03:39:39
2012-11-05 03:49:39	23.86	26.66	7.4745	-24.3221	-27.1764
2012-11-05 03:59:39	23.92	26.7	7.48145	-24.3833	-27.2171
2012-11-05 04:09:39	23.99	26.77	7.48839	-24.4546	-27.2885
2012-11-05 04:19:39	24.04	26.84	7.49534	-24.5056	-27.3598
2012-11-05 04:29:39	24.11	26.88	7.50228	-24.577	-27.4006
2012-11-05 04:39:39	24.18	26.96	7.50922	-24.6483	-27.4822	2012-11-05 04:39:39
2012-11-05 04:49:39	24.25	27.04	7.51617	-24.7197	-27.5637
2012-11-05 04:59:39	24.33	27.13	7.52311	-24.8012	-27.6555
2012-11-05 05:09:39	24.4	27.21	7.53006	-24.8726	-27.737
2012-11-05 05:19:39	24.47	27.27	7.537	-24.9439	-27.7982
2012-11-05 05:29:39	24.53	27.34	7.54395	-25.0051	-27.8695
2012-11-05 05:39:39	24.6	27.41	7.55089	-25.0765	-27.9409	2012-11-05 05:39:39
2012-11-05 05:49:39	24.66	27.44	7.55784	-25.1376	-27.9715
2012-11-05 05:59:39	24.74	27.52	7.56478	-25.2192	-28.053
2012-11-05 06:09:39	24.79	27.59	7.57172	-25.2701	-28.1244
2012-11-05 06:19:39	24.87	27.64	7.57867	-25.3517	-28.1753
2012-11-05 06:29:39	24.95	27.71	7.58561	-25.4332	-28.2467
2012-11-05 06:39:39	25.01	27.81	7.59256	-25.4944	-28.3486	2012-11-05 06:39:39
2012-11-05 06:49:39	25.07	27.87	7.5995	-25.5556	-28.4098
2012-11-05 06:59:39	25.14	27.96	7.60645	-25.6269	-28.5015
2012-11-05 07:09:39	25.19	27.99	7.61339	-25.6779	-28.5321
2012-11-05 07:19:39	25.26	28.06	7.62034	-25.7492	-28.6035
2012-11-05 07:29:39	25.31	28.14	7.62728	-25.8002	-28.685
2012-11-05 07:39:39	25.38	28.21	7.63422	-25.8716	-28.7564	2012-11-05 07:39:39
2012-11-05 07:49:39	25.48	28.28	7.64117	-25.9735	-28.8277
2012-11-05 07:59:39	25.54	28.36	7.64811	-26.0347	-28.9093
2012-11-05 08:09:39	25.61	28.41	7.65506	-26.106	-28.9602
2012-11-05 08:19:39	25.67	28.48	7.662	-26.1672	-29.0316
2012-11-05 08:29:39	25.73	28.56	7.66895	-26.2283	-29.1131
2012-11-05 08:39:39	25.81	28.62	7.67589	-26.3099	-29.1743	2012-11-05 08:39:39
2012-11-05 08:49:39	25.84	28.67	7.68284	-26.3405	-29.2253
2012-11-05 08:59:39	25.9	28.73	7.68978	-26.4016	-29.2864
2012-11-05 09:09:39	25.97	28.75	7.69672	-26.473	-29.3068
2012-11-05 09:19:39	26.02	28.85	7.70367	-26.524	-29.4088
2012-11-05 09:29:39	26.08	28.9	7.71061	-26.5851	-29.4597
2012-11-05 09:39:39	26.16	28.97	7.71756	-26.6667	-29.5311	2012-11-05 09:39:39
2012-11-05 09:49:39	26.21	29.01	7.7245	-26.7176	-29.5719
2012-11-05 09:59:39	26.27	29.09	7.73145	-26.7788	-29.6534
2012-11-05 10:09:39	26.33	29.16	7.73839	-26.84	-29.7248
2012-11-05 10:19:39	26.4	29.23	7.74534	-26.9113	-29.7961
2012-11-05 10:29:39	26.47	29.28	7.75228	-26.9827	-29.8471
2012-11-05 10:39:39	26.54	29.35	7.75922	-27.054	-29.9185	2012-11-05 10:39:39
2012-11-05 10:49:39	26.61	29.42	7.76617	-27.1254	-29.9898
2012-11-05 10:59:39	26.66	29.48	7.77311	-27.1764	-30.051
2012-11-05 11:09:39	26.67	29.51	7.78006	-27.1865	-30.0815
2012-11-05 11:19:39	26.76	29.6	7.787	-27.2783	-30.1733
2012-11-05 11:29:39	26.85	29.69	7.79395	-27.37	-30.265
2012-11-05 11:39:39	26.9	29.74	7.80089	-27.421	-30.316	2012-11-05 11:39:39
2012-11-05 11:49:39	26.97	29.8	7.80784	-27.4924	-30.3772
2012-11-05 11:59:39	27.03	29.88	7.81478	-27.5535	-30.4587
2012-11-05 12:09:39	27.1	29.94	7.82172	-27.6249	-30.5199
2012-11-05 12:19:39	27.17	30	7.82867	-27.6962	-30.581
2012-11-05 12:29:39	27.27	30.09	7.83561	-27.7982	-30.6728
2012-11-05 12:39:39	27.34	30.16	7.84256	-27.8695	-30.7441	2012-11-05 12:39:39
2012-11-05 12:49:39	27.42	30.25	7.8495	-27.9511	-30.8359
2012-11-05 12:59:39	27.51	30.34	7.85645	-28.0428	-30.9276
2012-11-05 13:09:39	27.58	30.41	7.86339	-28.1142	-30.999
2012-11-05 13:19:39	27.66	30.49	7.87034	-28.1957	-31.0805
2012-11-05 13:29:39	27.75	30.58	7.87728	-28.2875	-31.1723
2012-11-05 13:39:39	27.81	30.64	7.88422	-28.3486	-31.2334	2012-11-05 13:39:39
2012-11-05 13:49:39	27.91	30.74	7.89117	-28.4506	-31.3354
2012-11-05 13:59:39	27.98	30.82	7.89811	-28.5219	-31.4169
2012-11-05 14:09:39	28.06	30.9	7.90506	-28.6035	-31.4985
2012-11-05 14:19:39	28.15	30.98	7.912	-28.6952	-31.58
2012-11-05 14:29:39	28.24	31.07	7.91895	-28.787	-31.6718
2012-11-05 14:39:39	28.31	31.16	7.92589	-28.8583	-31.7635	2012-11-05 14:39:39
2012-11-05 14:49:39	28.4	31.23	7.93284	-28.9501	-31.8349
2012-11-05 14:59:39	28.49	31.32	7.93978	-29.0418	-31.9266
2012-11-05 15:09:39	28.57	31.42	7.94672	-29.1233	-32.0285
2012-11-05 15:19:39	28.64	31.49	7.95367	-29.1947	-32.0999
2012-11-05 15:29:39	28.71	31.56	7.96061	-29.2661	-32.1713
2012-11-05 15:39:39	28.82	31.64	7.96756	-29.3782	-32.2528	2012-11-05 15:39:39
2012-11-05 15:49:39	28.92	31.77	7.9745	-29.4801	-32.3853
2012-11-05 15:59:39	28.35	31.2	7.98145	-28.8991	-31.8043
2012-11-05 16:09:39	28.73	31.58	7.98839	-29.2864	-32.1916
2012-11-05 16:19:39	28.95	31.81	7.99534	-29.5107	-32.4261
2012-11-05 16:29:39	29.05	31.89	8.00228	-29.6126	-32.5076
2012-11-05 16:39:39	29.17	31.98	8.00922	-29.735	-32.5994	2012-11-05 16:39:39
2012-11-05 16:49:39	29.26	32.08	8.01617	-29.8267	-32.7013
2012-11-05 16:59:39	29.37	32.19	8.02311	-29.9388	-32.8135
2012-11-05 17:09:39	29.46	32.29	8.03006	-30.0306	-32.9154
2012-11-05 17:19:39	29.55	32.36	8.037	-30.1223	-32.9867
2012-11-05 17:29:39	29.64	32.46	8.04395	-30.2141	-33.0887
2012-11-05 17:39:39	29.74	32.57	8.05089	-30.316	-33.2008	2012-11-05 17:39:39
2012-11-05 17:49:39	29.85	32.69	8.05784	-30.4281	-33.3231
2012-11-05 17:59:39	29.95	32.78	8.06478	-30.5301	-33.4149
2012-11-05 18:09:39	30.04	32.86	8.07172	-30.6218	-33.4964
2012-11-05 18:19:39	30.12	32.97	8.07867	-30.7034	-33.6086
2012-11-05 18:29:39	30.22	33.05	8.08561	-30.8053	-33.6901
2012-11-05 18:39:39	30.33	33.16	8.09256	-30.9174	-33.8022	2012-11-05 18:39:39
2012-11-05 18:49:39	30.41	33.25	8.0995	-30.999	-33.894
2012-11-05 18:59:39	30.53	33.37	8.10645	-31.1213	-34.0163
2012-11-05 19:09:39	30.62	33.45	8.11339	-31.213	-34.0979
2012-11-05 19:19:39	30.7	33.55	8.12034	-31.2946	-34.1998
2012-11-05 19:29:39	30.83	33.67	8.12728	-31.4271	-34.3221
2012-11-05 19:39:39	30.95	33.79	8.13422	-31.5494	-34.4444	2012-11-05 19:39:39
2012-11-05 19:49:39	31.05	33.89	8.14117	-31.6514	-34.5464
2012-11-05 19:59:39	31.16	33.98	8.14811	-31.7635	-34.6381
2012-11-05 20:09:39	31.17	33.99	8.15506	-31.7737	-34.6483
2012-11-05 20:19:39	31.31	34.12	8.162	-31.9164	-34.7808
2012-11-05 20:29:39	31.4	34.21	8.16895	-32.0082	-34.8726
2012-11-05 20:39:39	31.49	34.29	8.17589	-32.0999	-34.9541	2012-11-05 20:39:39
2012-11-05 20:49:39	31.58	34.38	8.18284	-32.1916	-35.0459
2012-11-05 20:59:39	31.65	34.46	8.18978	-32.263	-35.1274
2012-11-05 21:09:39	31.76	34.55	8.19672	-32.3751	-35.2192
2012-11-05 21:19:39	31.83	34.65	8.20367	-32.4465	-35.3211
2012-11-05 21:29:39	31.94	34.75	8.21061	-32.5586	-35.423
2012-11-05 21:39:39	32.04	34.85	8.21756	-32.6606	-35.525	2012-11-05 21:39:39
2012-11-05 21:49:39	32.15	34.95	8.2245	-32.7727	-35.6269
2012-11-05 21:59:39	32.24	35.05	8.23145	-32.8644	-35.7288
2012-11-05 22:09:39	32.33	35.15	8.23839	-32.9562	-35.8308
2012-11-05 22:19:39	32.43	35.24	8.24534	-33.0581	-35.9225
2012-11-05 22:29:39	32.53	35.34	8.25228	-33.16	-36.0245
2012-11-05 22:39:39	32.63	35.44	8.25922	-33.262	-36.1264	2012-11-05 22:39:39
2012-11-05 22:49:39	32.72	35.53	8.26617	-33.3537	-36.2181
2012-11-05 22:59:39	32.82	35.63	8.27311	-33.4557	-36.3201
2012-11-05 23:09:39	32.92	35.71	8.28006	-33.5576	-36.4016
2012-11-05 23:19:39	32.99	35.79	8.287	-33.629	-36.4832
2012-11-05 23:29:39	33.09	35.9	8.29395	-33.7309	-36.5953
2012-11-05 23:39:39	33.19	35.97	8.30089	-33.8328	-36.6667	2012-11-05 23:39:39
2012-11-05 23:49:39	33.28	36.1	8.30784	-33.9246	-36.7992
2012-11-05 23:59:39	33.4	36.2	8.31478	-34.0469	-36.9011
2012-11-06 00:09:39	33.47	36.28	8.32172	-34.1182	-36.9827
2012-11-06 00:19:39	33.6	36.4	8.32867	-34.2508	-37.105
2012-11-06 00:29:39	33.69	36.51	8.33561	-34.3425	-37.2171
2012-11-06 00:39:39	33.79	36.61	8.34256	-34.4444	-37.3191	2012-11-06 00:39:39
2012-11-06 00:49:39	33.89	36.71	8.3495	-34.5464	-37.421
2012-11-06 00:59:39	33.99	36.81	8.35645	-34.6483	-37.5229
2012-11-06 01:09:39	34.05	36.91	8.36339	-34.7095	-37.6249
2012-11-06 01:19:39	34.21	37.03	8.37034	-34.8726	-37.7472
2012-11-06 01:29:39	34.33	37.14	8.37728	-34.9949	-37.8593
2012-11-06 01:39:39	34.43	37.25	8.38422	-35.0968	-37.9715	2012-11-06 01:39:39
2012-11-06 01:49:39	34.54	37.36	8.39117	-35.209	-38.0836
2012-11-06 01:59:39	34.61	37.45	8.39811	-35.2803	-38.1753
2012-11-06 02:09:39	34.72	37.54	8.40506	-35.3925	-38.2671
2012-11-06 02:19:39	34.82	37.65	8.412	-35.4944	-38.3792
2012-11-06 02:29:39	34.92	37.73	8.41895	-35.5963	-38.4608
2012-11-06 02:39:39	35.04	37.84	8.42589	-35.7187	-38.5729	2012-11-06 02:39:39
2012-11-06 02:49:39	35.13	37.95	8.43284	-35.8104	-38.685
2012-11-06 02:59:39	35.25	38.08	8.43978	-35.9327	-38.8175
2012-11-06 03:09:39	35.38	38.21	8.44672	-36.0652	-38.9501
2012-11-06 03:19:39	35.5	38.3	8.45367	-36.1876	-39.0418
2012-11-06 03:29:39	35.61	38.42	8.46061	-36.2997	-39.1641
2012-11-06 03:39:39	35.72	38.55	8.46756	-36.4118	-39.2966	2012-11-06 03:39:39
2012-11-06 03:49:39	35.84	38.66	8.4745	-36.5341	-39.4088
2012-11-06 03:59:39	35.96	38.77	8.48145	-36.6565	-39.5209
2012-11-06 04:09:39	36.06	38.87	8.48839	-36.7584	-39.6228
2012-11-06 04:19:39	36.16	39	8.49534	-36.8603	-39.7554
2012-11-06 04:29:39	36.27	39.11	8.50228	-36.9725	-39.8675
2012-11-06 04:39:39	36.39	39.22	8.50922	-37.0948	-39.9796	2012-11-06 04:39:39
2012-11-06 04:49:39	36.51	39.31	8.51617	-37.2171	-40.0714
2012-11-06 04:59:39	36.62	39.45	8.52311	-37.3293	-40.2141
2012-11-06 05:09:39	36.75	39.56	8.53006	-37.4618	-40.3262
2012-11-06 05:19:39	36.85	39.68	8.537	-37.5637	-40.4485
2012-11-06 05:29:39	36.95	39.76	8.54395	-37.6656	-40.5301
2012-11-06 05:39:39	37.05	39.9	8.55089	-37.7676	-40.6728	2012-11-06 05:39:39
2012-11-06 05:49:39	37.16	40	8.55784	-37.8797	-40.7747
2012-11-06 05:59:39	37.28	40.1	8.56478	-38.002	-40.8767
2012-11-06 06:09:39	37.4	40.25	8.57172	-38.1244	-41.0296
2012-11-06 06:19:39	37.52	40.35	8.57867	-38.2467	-41.1315
2012-11-06 06:29:39	37.64	40.49	8.58561	-38.369	-41.2742
2012-11-06 06:39:39	37.75	40.59	8.59256	-38.4811	-41.3761	2012-11-06 06:39:39
2012-11-06 06:49:39	37.86	40.71	8.5995	-38.5933	-41.4985
2012-11-06 06:59:39	37.98	40.83	8.60645	-38.7156	-41.6208
2012-11-06 07:09:39	38.11	40.95	8.61339	-38.8481	-41.7431
2012-11-06 07:19:39	38.23	41.08	8.62034	-38.9704	-41.8756
2012-11-06 07:29:39	38.36	41.21	8.62728	-39.103	-42.0082
2012-11-06 07:39:39	38.48	41.31	8.63422	-39.2253	-42.1101	2012-11-06 07:39:39
2012-11-06 07:49:39	38.62	41.46	8.64117	-39.368	-42.263
2012-11-06 07:59:39	38.73	41.59	8.64811	-39.4801	-42.3955
2012-11-06 08:09:39	38.87	41.73	8.65506	-39.6228	-42.5382
2012-11-06 08:19:39	38.99	41.84	8.662	-39.7452	-42.6504
2012-11-06 08:29:39	39.1	41.97	8.66895	-39.8573	-42.7829
2012-11-06 08:39:39	39.22	42.07	8.67589	-39.9796	-42.8848	2012-11-06 08:39:39
2012-11-06 08:49:39	39.3	42.14	8.68284	-40.0612	-42.9562
2012-11-06 08:59:39	39.42	42.28	8.68978	-40.1835	-43.0989
2012-11-06 09:09:39	39.55	42.4	8.69672	-40.316	-43.2212
2012-11-06 09:19:39	39.67	42.53	8.70367	-40.4383	-43.3537
2012-11-06 09:29:39	39.81	42.67	8.71061	-40.581	-43.4964
2012-11-06 09:39:39	39.96	42.81	8.71756	-40.7339	-43.6391	2012-11-06 09:39:39
2012-11-06 09:49:39	40.07	42.94	8.7245	-40.8461	-43.7717
2012-11-06 09:59:39	40.19	43.06	8.73145	-40.9684	-43.894
2012-11-06 10:09:39	40.3	43.17	8.73839	-41.0805	-44.0061
2012-11-06 10:19:39	40.45	43.3	8.74534	-41.2334	-44.1386
2012-11-06 10:29:39	40.58	43.43	8.75228	-41.366	-44.2712
2012-11-06 10:39:39	40.7	43.56	8.75922	-41.4883	-44.4037	2012-11-06 10:39:39
2012-11-06 10:49:39	40.86	43.72	8.76617	-41.6514	-44.5668
2012-11-06 10:59:39	41	43.85	8.77311	-41.7941	-44.6993
2012-11-06 11:09:39	41.1	43.99	8.78006	-41.896	-44.842
2012-11-06 11:19:39	41.21	44.07	8.787	-42.0082	-44.9235
2012-11-06 11:39:39	41.47	44.33	8.80089	-42.2732	-45.1886
2012-11-06 11:49:39	41.59	44.43	8.80784	-42.3955	-45.2905	2012-11-06 11:49:39
2012-11-06 11:59:39	41.71	44.58	8.81478	-42.5178	-45.4434
2012-11-06 12:09:39	41.83	44.7	8.82172	-42.6402	-45.5657
2012-11-06 12:19:39	41.96	44.83	8.82867	-42.7727	-45.6983
2012-11-06 12:29:39	42.09	44.96	8.83561	-42.9052	-45.8308
2012-11-06 12:39:39	42.23	45.1	8.84256	-43.0479	-45.9735
2012-11-06 12:49:39	41.77	44.68	8.8495	-42.579	-45.5454	2012-11-06 12:49:39
2012-11-06 12:59:39	42.27	45.14	8.85645	-43.0887	-46.0143
2012-11-06 13:09:39	42.48	45.35	8.86339	-43.3028	-46.2283
2012-11-06 13:19:39	42.59	45.48	8.87034	-43.4149	-46.3609
2012-11-06 13:29:39	42.74	45.66	8.87728	-43.5678	-46.5443
2012-11-06 13:39:39	42.83	45.77	8.88422	-43.6595	-46.6565
2012-11-06 13:49:39	43.01	45.87	8.89117	-43.843	-46.7584	2012-11-06 13:49:39
2012-11-06 13:59:39	43.04	46.05	8.89811	-43.8736	-46.9419
2012-11-06 14:09:39	43.34	46.21	8.90506	-44.1794	-47.105
2012-11-06 14:19:39	43.47	46.34	8.912	-44.3119	-47.2375
2012-11-06 14:29:39	43.6	46.47	8.91895	-44.4444	-47.37
2012-11-06 14:39:39	43.73	46.6	8.92589	-44.577	-47.5025
2012-11-06 14:49:39	43.86	46.74	8.93284	-44.7095	-47.6453	2012-11-06 14:49:39
2012-11-06 14:59:39	43.99	46.88	8.93978	-44.842	-47.788
2012-11-06 15:09:39	44.12	47	8.94672	-44.9745	-47.9103
2012-11-06 15:19:39	44.26	47.15	8.95367	-45.1172	-48.0632
2012-11-06 15:29:39	44.41	47.3	8.96061	-45.2701	-48.2161
2012-11-06 15:39:39	44.54	47.43	8.96756	-45.4027	-48.3486
2012-11-06 15:49:39	44.71	47.61	8.9745	-45.5759	-48.5321	2012-11-06 15:49:39
2012-11-06 15:59:39	44.9	47.79	8.98145	-45.7696	-48.7156
2012-11-06 16:09:39	45.03	47.91	8.98839	-45.9021	-48.8379
2012-11-06 16:19:39	45.16	48.04	8.99534	-46.0347	-48.9704
2012-11-06 16:29:39	45.32	48.2	9.00228	-46.1978	-49.1335
2012-11-06 16:39:39	45.49	48.35	9.00922	-46.371	-49.2864
2012-11-06 16:49:39	45.68	48.56	9.01617	-46.5647	-49.5005	2012-11-06 16:49:39
2012-11-06 16:59:39	45.84	48.73	9.02311	-46.7278	-49.6738
2012-11-06 17:09:39	46.01	48.91	9.03006	-46.9011	-49.8573
2012-11-06 17:19:39	45.27	48.33	9.037	-46.1468	-49.2661
2012-11-06 17:29:39	45.78	48.72	9.04395	-46.6667	-49.6636
2012-11-06 17:39:39	46.19	49.12	9.05089	-47.0846	-50.0714
2012-11-06 17:49:39	46.45	49.37	9.05784	-47.3496	-50.3262	2012-11-06 17:49:39
2012-11-06 17:59:39	46.65	49.56	9.06478	-47.5535	-50.5199
2012-11-06 18:09:39	46.85	49.78	9.07172	-47.7574	-50.7441
2012-11-06 18:19:39	47.07	49.98	9.07867	-47.9817	-50.948
2012-11-06 18:29:39	47.28	50.19	9.08561	-48.1957	-51.1621
2012-11-06 18:39:39	47.49	50.41	9.09256	-48.4098	-51.3863
2012-11-06 18:49:39	47.69	50.61	9.0995	-48.6137	-51.5902	2012-11-06 18:49:39
2012-11-06 18:59:39	47.89	50.82	9.10645	-48.8175	-51.8043
2012-11-06 19:09:39	48.07	51.01	9.11339	-49.001	-51.998
2012-11-06 19:19:39	48.3	51.24	9.12034	-49.2355	-52.2324
2012-11-06 19:29:39	48.53	51.48	9.12728	-49.4699	-52.4771
2012-11-06 19:39:39	48.72	51.67	9.13422	-49.6636	-52.6707
2012-11-06 19:49:39	48.93	51.85	9.14117	-49.8777	-52.8542	2012-11-06 19:49:39
2012-11-06 19:59:39	49.15	52.09	9.14811	-50.1019	-53.0989
2012-11-06 20:09:39	49.35	52.3	9.15506	-50.3058	-53.3129
2012-11-06 20:19:39	49.56	52.51	9.162	-50.5199	-53.527
2012-11-06 20:29:39	49.82	52.76	9.16895	-50.7849	-53.7819
2012-11-06 20:39:39	50.02	52.98	9.17589	-50.9888	-54.0061
2012-11-06 20:49:39	50.22	53.16	9.18284	-51.1927	-54.1896	2012-11-06 20:49:39
2012-11-06 20:59:39	50.36	53.32	9.18978	-51.3354	-54.3527
2012-11-06 21:09:39	50.63	53.57	9.19672	-51.6106	-54.6075
2012-11-06 21:19:39	50.82	53.77	9.20367	-51.8043	-54.8114
2012-11-06 21:29:39	51.06	53.99	9.21061	-52.0489	-55.0357
2012-11-06 21:39:39	51.26	54.23	9.21756	-52.2528	-55.2803
2012-11-06 21:49:39	51.49	54.41	9.2245	-52.4873	-55.4638	2012-11-06 21:49:39
2012-11-06 21:59:39	51.73	54.66	9.23145	-52.7319	-55.7187
2012-11-06 22:09:39	51.96	54.9	9.23839	-52.9664	-55.9633
2012-11-06 22:19:39	52.17	55.14	9.24534	-53.1804	-56.208
2012-11-06 22:29:39	52.37	55.34	9.25228	-53.3843	-56.4118
2012-11-06 22:39:39	52.58	55.55	9.25922	-53.5984	-56.6259
2012-11-06 22:49:39	52.83	55.78	9.26617	-53.8532	-56.8603	2012-11-06 22:49:39
2012-11-06 22:59:39	53.06	55.99	9.27311	-54.0877	-57.0744
2012-11-06 23:09:39	53.27	56.28	9.28006	-54.3017	-57.37
2012-11-06 23:19:39	53.53	56.48	9.287	-54.5668	-57.5739
2012-11-06 23:29:39	53.74	56.71	9.29395	-54.7808	-57.8084
2012-11-06 23:39:39	53.93	56.92	9.30089	-54.9745	-58.0224
2012-11-06 23:49:39	54.2	57.17	9.30784	-55.2497	-58.2773	2012-11-06 23:49:39
2012-11-06 23:59:39	54.44	57.42	9.31478	-55.4944	-58.5321
2012-11-07 00:09:39	54.55	57.59	9.32172	-55.6065	-58.7054
2012-11-07 00:19:39	54.85	57.8	9.32867	-55.9123	-58.9195
2012-11-07 00:29:39	55.05	58.04	9.33561	-56.1162	-59.1641
2012-11-07 00:39:39	55.31	58.27	9.34256	-56.3812	-59.3986
2012-11-07 00:49:39	55.51	58.45	9.3495	-56.5851	-59.5821	2012-11-07 00:49:39
2012-11-07 00:59:39	55.74	58.68	9.35645	-56.8196	-59.8165
2012-11-07 01:09:39	55.94	58.9	9.36339	-57.0234	-60.0408
2012-11-07 01:19:39	56.13	59.1	9.37034	-57.2171	-60.2446
2012-11-07 01:29:39	56.32	59.33	9.37728	-57.4108	-60.4791
2012-11-07 01:39:39	56.56	59.57	9.38422	-57.6555	-60.7238
2012-11-07 01:49:39	56.8	59.75	9.39117	-57.9001	-60.9072	2012-11-07 01:49:39
2012-11-07 01:59:39	56.99	59.98	9.39811	-58.0938	-61.1417
2012-11-07 02:09:39	57.25	60.17	9.40506	-58.3588	-61.3354
2012-11-07 02:19:39	57.46	60.44	9.412	-58.5729	-61.6106
2012-11-07 02:29:39	57.66	60.62	9.41895	-58.7768	-61.7941
2012-11-07 02:39:39	57.87	60.85	9.42589	-58.9908	-62.0285
2012-11-07 02:49:39	58.12	61.08	9.43284	-59.2457	-62.263	2012-11-07 02:49:39
2012-11-07 02:59:39	58.38	61.36	9.43978	-59.5107	-62.5484
2012-11-07 03:09:39	58.58	61.59	9.44672	-59.7146	-62.7829
2012-11-07 03:19:39	58.81	61.79	9.45367	-59.949	-62.9867
2012-11-07 03:29:39	59.06	62.04	9.46061	-60.2039	-63.2416
2012-11-07 03:39:39	59.31	62.3	9.46756	-60.4587	-63.5066
2012-11-07 03:49:39	59.51	62.52	9.4745	-60.6626	-63.7309	2012-11-07 03:49:39
2012-11-07 03:59:39	59.77	62.79	9.48145	-60.9276	-64.0061
2012-11-07 04:09:39	60.01	62.97	9.48839	-61.1723	-64.1896
2012-11-07 04:19:39	60.2	63.19	9.49534	-61.366	-64.4139
2012-11-07 04:29:39	60.42	63.44	9.50228	-61.5902	-64.6687
2012-11-07 04:39:39	60.65	63.69	9.50922	-61.8247	-64.9235
2012-11-07 04:49:39	60.9	63.91	9.51617	-62.0795	-65.1478	2012-11-07 04:49:39
2012-11-07 04:59:39	61.17	64.15	9.52311	-62.3547	-65.3925
2012-11-07 05:09:39	61.39	64.41	9.53006	-62.579	-65.6575
2012-11-07 05:19:39	61.66	64.67	9.537	-62.8542	-65.9225
2012-11-07 05:29:39	61.87	64.89	9.54395	-63.0683	-66.1468
2012-11-07 05:39:39	62.11	65.12	9.55089	-63.3129	-66.3812
2012-11-07 05:49:39	62.38	65.39	9.55784	-63.5882	-66.6565	2012-11-07 05:49:39
2012-11-07 05:59:39	62.63	65.65	9.56478	-63.843	-66.9215
2012-11-07 06:09:39	62.87	65.9	9.57172	-64.0877	-67.1764
2012-11-07 06:19:39	63.1	66.13	9.57867	-64.3221	-67.4108
2012-11-07 06:29:39	63.34	66.35	9.58561	-64.5668	-67.6351
2012-11-07 06:39:39	63.6	66.63	9.59256	-64.8318	-67.9205
2012-11-07 06:49:39	63.85	66.88	9.5995	-65.0866	-68.1753	2012-11-07 06:49:39
2012-11-07 06:59:39	64.1	67.14	9.60645	-65.3415	-68.4404
2012-11-07 07:09:39	64.36	67.37	9.61339	-65.6065	-68.6748
2012-11-07 07:19:39	64.6	67.62	9.62034	-65.8512	-68.9297
2012-11-07 07:29:39	64.84	67.87	9.62728	-66.0958	-69.1845
2012-11-07 07:39:39	65.08	68.12	9.63422	-66.3405	-69.4393
2012-11-07 07:49:39	65.34	68.38	9.64117	-66.6055	-69.7044	2012-11-07 07:49:39
2012-11-07 07:59:39	65.63	68.64	9.64811	-66.9011	-69.9694
2012-11-07 08:09:39	65.85	68.88	9.65506	-67.1254	-70.2141
2012-11-07 08:19:39	66.06	69.08	9.662	-67.3394	-70.4179
2012-11-07 08:29:39	66.22	69.24	9.66895	-67.5025	-70.581
2012-11-07 08:39:39	66.36	69.43	9.67589	-67.6453	-70.7747
2012-11-07 08:49:39	66.64	69.66	9.68284	-67.9307	-71.0092	2012-11-07 08:49:39
2012-11-07 08:59:39	66.83	69.84	9.68978	-68.1244	-71.1927
2012-11-07 09:09:39	67	69.99	9.69672	-68.2977	-71.3456
2012-11-07 09:19:39	67.2	70.2	9.70367	-68.5015	-71.5596
2012-11-07 09:29:39	67.43	70.41	9.71061	-68.736	-71.7737
2012-11-07 09:39:39	67.63	70.64	9.71756	-68.9399	-72.0082
2012-11-07 09:49:39	67.89	70.87	9.7245	-69.2049	-72.2426	2012-11-07 09:49:39
2012-11-07 09:59:39	68.13	71.13	9.73145	-69.4495	-72.5076
2012-11-07 10:09:39	68.25	71.35	9.73839	-69.5719	-72.7319
2012-11-07 10:19:39	68.52	71.57	9.74534	-69.8471	-72.9562
2012-11-07 10:29:39	68.76	71.84	9.75228	-70.0917	-73.2314
2012-11-07 10:39:39	68.99	72.07	9.75922	-70.3262	-73.4659
2012-11-07 10:49:39	69.2	72.34	9.76617	-70.5403	-73.7411	2012-11-07 10:49:39
2012-11-07 10:59:39	69.47	72.57	9.77311	-70.8155	-73.9755
2012-11-07 11:09:39	69.69	72.76	9.78006	-71.0398	-74.1692
2012-11-07 11:19:39	69.94	73.05	9.787	-71.2946	-74.4648
2012-11-07 11:29:39	70.14	73.29	9.79395	-71.4985	-74.7095
2012-11-07 11:39:39	70.43	73.56	9.80089	-71.7941	-74.9847
2012-11-07 11:49:39	70.67	73.78	9.80784	-72.0387	-75.209	2012-11-07 11:49:39
2012-11-07 11:59:39	70.92	74.02	9.81478	-72.2936	-75.4536
2012-11-07 12:09:39	71.15	74.28	9.82172	-72.528	-75.7187
2012-11-07 12:19:39	71.43	74.57	9.82867	-72.8135	-76.0143
2012-11-07 12:29:39	71.7	74.85	9.83561	-73.0887	-76.2997
2012-11-07 12:39:39	71.96	75.09	9.84256	-73.3537	-76.5443
2012-11-07 12:49:39	72.25	75.42	9.8495	-73.6493	-76.8807	2012-11-07 12:49:39
2012-11-07 12:59:39	72.54	75.72	9.85645	-73.945	-77.1865
2012-11-07 13:09:39	72.85	76.01	9.86339	-74.261	-77.4822
2012-11-07 13:19:39	73.12	76.3	9.87034	-74.5362	-77.7778
2012-11-07 13:29:39	73.41	76.57	9.87728	-74.8318	-78.053
2012-11-07 13:39:39	73.72	76.91	9.88422	-75.1478	-78.3996
2012-11-07 13:49:39	74	77.18	9.89117	-75.4332	-78.6748	2012-11-07 13:49:39
2012-11-07 13:59:39	74.29	77.48	9.89811	-75.7288	-78.9806
2012-11-07 14:09:39	74.57	77.8	9.90506	-76.0143	-79.3068
2012-11-07 14:19:39	74.87	78.06	9.912	-76.3201	-79.5719
2012-11-07 14:29:39	75.18	78.36	9.91895	-76.6361	-79.8777
2012-11-07 14:39:39	75.47	78.66	9.92589	-76.9317	-80.1835
2012-11-07 14:49:39	75.75	78.97	9.93284	-77.2171	-80.4995	2012-11-07 14:49:39
2012-11-07 14:59:39	76.04	79.25	9.93978	-77.5127	-80.7849
2012-11-07 15:09:39	76.35	79.58	9.94672	-77.8287	-81.1213
2012-11-07 15:19:39	76.68	79.91	9.95367	-78.1651	-81.4577
2012-11-07 15:29:39	76.98	80.18	9.96061	-78.4709	-81.7329
2012-11-07 15:39:39	77.28	80.52	9.96756	-78.7768	-82.0795
2012-11-07 15:49:39	77.57	80.81	9.9745	-79.0724	-82.3751	2012-11-07 15:49:39
2012-11-07 15:59:39	77.9	81.09	9.98145	-79.4088	-82.6606
2012-11-07 16:09:39	78.17	81.41	9.98839	-79.684	-82.9867
2012-11-07 16:19:39	78.49	81.74	9.99534	-80.0102	-83.3231
2012-11-07 16:29:39	78.82	82.06	10.0023	-80.3466	-83.6493
2012-11-07 16:39:39	79.12	82.34	10.0092	-80.6524	-83.9348
2012-11-07 16:49:39	79.41	82.63	10.0162	-80.948	-84.2304	2012-11-07 16:49:39
2012-11-07 16:59:39	79.68	82.87	10.0231	-81.2232	-84.475
2012-11-07 17:09:39	79.97	83.18	10.0301	-81.5189	-84.791
2012-11-07 17:19:39	79.66	83.16	10.037	-81.2029	-84.7706
2012-11-07 17:29:39	80.09	83.41	10.0439	-81.6412	-85.0255
2012-11-07 17:39:39	80.5	83.75	10.0509	-82.0591	-85.3721
2012-11-07 17:49:39	80.84	84.11	10.0578	-82.4057	-85.739	2012-11-07 17:49:39
2012-11-07 17:59:39	81.2	84.45	10.0648	-82.7727	-86.0856
2012-11-07 18:09:39	81.54	84.8	10.0717	-83.1193	-86.4424
2012-11-07 18:19:39	81.88	85.15	10.0787	-83.4659	-86.7992
2012-11-07 18:29:39	82.22	85.52	10.0856	-83.8124	-87.1764
2012-11-07 18:39:39	82.55	85.84	10.0926	-84.1488	-87.5025
2012-11-07 18:49:39	82.9	86.13	10.0995	-84.5056	-87.7982	2012-11-07 18:49:39
2012-11-07 18:59:39	83.18	86.47	10.1064	-84.791	-88.1448
2012-11-07 19:09:39	83.56	86.86	10.1134	-85.1784	-88.5423
2012-11-07 19:19:39	83.94	87.2	10.1203	-85.5657	-88.8889
2012-11-07 19:29:39	84.29	87.56	10.1273	-85.9225	-89.2559
2012-11-07 19:39:39	84.61	87.93	10.1342	-86.2487	-89.633
2012-11-07 19:49:39	84.91	88.22	10.1412	-86.5545	-89.9286	2012-11-07 19:49:39
2012-11-07 19:59:39	85.23	88.48	10.1481	-86.8807	-90.1937
2012-11-07 20:09:39	85.49	88.88	10.1551	-87.1458	-90.6014
2012-11-07 20:19:39	85.87	89.23	10.162	-87.5331	-90.9582
2012-11-07 20:29:39	86.23	89.58	10.1689	-87.9001	-91.315
2012-11-07 20:39:39	86.56	89.87	10.1759	-88.2365	-91.6106
2012-11-07 20:49:39	86.9	90.21	10.1828	-88.5831	-91.9572	2012-11-07 20:49:39
2012-11-07 20:59:39	87.23	90.57	10.1898	-88.9195	-92.3242
2012-11-07 21:09:39	87.59	90.95	10.1967	-89.2864	-92.7115
2012-11-07 21:19:39	87.93	91.25	10.2037	-89.633	-93.0173
2012-11-07 21:29:39	88.27	91.62	10.2106	-89.9796	-93.3945
2012-11-07 21:39:39	88.6	91.99	10.2176	-90.316	-93.7717
2012-11-07 21:49:39	88.95	92.33	10.2245	-90.6728	-94.1182	2012-11-07 21:49:39
2012-11-07 21:59:39	89.3	92.67	10.2314	-91.0296	-94.4648
2012-11-07 22:09:39	89.64	93.05	10.2384	-91.3761	-94.8522
2012-11-07 22:19:39	89.97	93.38	10.2453	-91.7125	-95.1886
2012-11-07 22:29:39	90.31	93.7	10.2523	-92.0591	-95.5148
2012-11-07 22:39:39	90.65	94.04	10.2592	-92.4057	-95.8614
2012-11-07 22:49:39	91	94.41	10.2662	-92.7625	-96.2385	2012-11-07 22:49:39
2012-11-07 22:59:39	91.3	94.68	10.2731	-93.0683	-96.5138
2012-11-07 23:09:39	91.65	95.08	10.2801	-93.4251	-96.9215
2012-11-07 23:19:39	92	95.44	10.287	-93.7819	-97.2885
2012-11-07 23:29:39	92.36	95.81	10.2939	-94.1488	-97.6656
2012-11-07 23:39:39	92.71	96.17	10.3009	-94.5056	-98.0326
2012-11-07 23:49:39	93.01	96.47	10.3078	-94.8114	-98.3384	2012-11-07 23:49:39
2012-11-07 23:59:39	93.38	96.89	10.3148	-95.1886	-98.7666
2012-11-08 00:09:39	93.7	97.18	10.3217	-95.5148	-99.0622
2012-11-08 00:19:39	94.07	97.57	10.3287	-95.8919	-99.4597
2012-11-08 00:29:39	94.44	97.9	10.3356	-96.2691	-99.7961
2012-11-08 00:39:39	94.75	98.32	10.3426	-96.5851	-100.224
2012-11-08 00:49:39	95.03	98.68	10.3495	-96.8705	-100.591	2012-11-08 00:49:39
2012-11-08 00:59:39	95.5	99.03	10.3564	-97.3496	-100.948
2012-11-08 01:09:39	95.88	99.43	10.3634	-97.737	-101.356
2012-11-08 01:19:39	96.23	99.79	10.3703	-98.0938	-101.723
2012-11-08 01:29:39	96.61	100.16	10.3773	-98.4811	-102.1
2012-11-08 01:39:39	96.93	100.55	10.3842	-98.8073	-102.497
2012-11-08 01:49:39	97.32	100.93	10.3912	-99.2049	-102.885	2012-11-08 01:49:39
2012-11-08 01:59:39	97.71	101.35	10.3981	-99.6024	-103.313
2012-11-08 02:09:39	98.08	101.68	10.4051	-99.9796	-103.649
2012-11-08 02:19:39	98.44	102.07	10.412	-100.347	-104.047
2012-11-08 02:29:39	98.82	102.45	10.4189	-100.734	-104.434
2012-11-08 02:39:39	99.21	102.86	10.4259	-101.131	-104.852
2012-11-08 02:49:39	99.59	103.23	10.4328	-101.519	-105.229	2012-11-08 02:49:39
2012-11-08 02:59:39	99.96	103.64	10.4398	-101.896	-105.647
2012-11-08 03:09:39	100.35	104.03	10.4467	-102.294	-106.045
2012-11-08 03:19:39	100.71	104.33	10.4537	-102.661	-106.351
2012-11-08 03:29:39	101.06	104.74	10.4606	-103.017	-106.769
2012-11-08 03:39:39	101.45	105.16	10.4676	-103.415	-107.197
2012-11-08 03:49:39	101.83	105.58	10.4745	-103.802	-107.625	2012-11-08 03:49:39
2012-11-08 03:59:39	102.22	105.94	10.4814	-104.2	-107.992
2012-11-08 04:09:39	102.51	106.31	10.4884	-104.495	-108.369
2012-11-08 04:19:39	102.95	106.66	10.4953	-104.944	-108.726
2012-11-08 04:29:39	103.35	107.05	10.5023	-105.352	-109.123
2012-11-08 04:39:39	103.71	107.44	10.5092	-105.719	-109.521
2012-11-08 04:49:39	104.08	107.84	10.5162	-106.096	-109.929	2012-11-08 04:49:39
2012-11-08 04:59:39	104.46	108.27	10.5231	-106.483	-110.367
2012-11-08 05:09:39	104.84	108.66	10.5301	-106.871	-110.765
2012-11-08 05:19:39	105.29	109.11	10.537	-107.329	-111.223
2012-11-08 05:29:39	105.65	109.43	10.5439	-107.696	-111.549
2012-11-08 05:39:39	106.02	109.9	10.5509	-108.073	-112.029
2012-11-08 05:49:39	106.4	110.23	10.5578	-108.461	-112.365	2012-11-08 05:49:39
2012-11-08 05:59:39	106.81	110.69	10.5648	-108.879	-112.834
2012-11-08 06:09:39	107.17	111.07	10.5717	-109.246	-113.221
2012-11-08 06:19:39	107.59	111.51	10.5787	-109.674	-113.67
2012-11-08 06:29:39	107.99	111.94	10.5856	-110.082	-114.108
2012-11-08 06:39:39	108.41	112.35	10.5926	-110.51	-114.526
2012-11-08 06:49:39	108.8	112.69	10.5995	-110.907	-114.873	2012-11-08 06:49:39
2012-11-08 06:59:39	109.2	113.12	10.6064	-111.315	-115.311
2012-11-08 07:09:39	109.62	113.56	10.6134	-111.743	-115.759
2012-11-08 07:19:39	110.01	112.88	10.6203	-112.141	-115.066
2012-11-08 07:29:39	110.39	114.36	10.6273	-112.528	-116.575
2012-11-08 07:39:39	110.78	114.75	10.6342	-112.926	-116.972
2012-11-08 07:49:39	111.18	115.17	10.6412	-113.333	-117.401	2012-11-08 07:49:39
2012-11-08 07:59:39	111.55	115.51	10.6481	-113.71	-117.747
2012-11-08 08:09:39	111.96	115.84	10.6551	-114.128	-118.084
2012-11-08 08:19:39	112.32	116.36	10.662	-114.495	-118.614
2012-11-08 08:29:39	112.72	116.72	10.6689	-114.903	-118.981
2012-11-08 08:39:39	113.09	117.19	10.6759	-115.28	-119.46
2012-11-08 08:49:39	113.46	117.57	10.6828	-115.657	-119.847	2012-11-08 08:49:39
2012-11-08 08:59:39	113.84	117.93	10.6898	-116.045	-120.214
2012-11-08 09:09:39	114.27	118.42	10.6967	-116.483	-120.714
2012-11-08 09:19:39	114.7	118.84	10.7037	-116.922	-121.142
2012-11-08 09:29:39	115.13	119.29	10.7106	-117.36	-121.6
2012-11-08 09:39:39	115.48	119.69	10.7176	-117.717	-122.008
2012-11-08 09:49:39	115.88	120.07	10.7245	-118.124	-122.396	2012-11-08 09:49:39
2012-11-08 09:59:39	116.31	120.49	10.7314	-118.563	-122.824
2012-11-08 10:09:39	116.63	120.71	10.7384	-118.889	-123.048
2012-11-08 10:19:39	117.02	121.06	10.7453	-119.286	-123.405
2012-11-08 10:29:39	117.38	121.51	10.7523	-119.653	-123.863
2012-11-08 10:39:39	117.73	121.89	10.7592	-120.01	-124.251
2012-11-08 10:49:39	118.14	122.32	10.7662	-120.428	-124.689	2012-11-08 10:49:39
2012-11-08 10:59:39	118.55	122.78	10.7731	-120.846	-125.158
2012-11-08 11:09:39	118.94	123.14	10.7801	-121.244	-125.525
2012-11-08 11:19:39	119.35	123.63	10.787	-121.662	-126.024
2012-11-08 11:29:39	119.75	124.02	10.7939	-122.069	-126.422
2012-11-08 11:39:39	120.15	124.39	10.8009	-122.477	-126.799
2012-11-08 11:49:39	120.56	124.84	10.8078	-122.895	-127.258	2012-11-08 11:49:39
2012-11-08 11:59:39	120.92	125.27	10.8148	-123.262	-127.696
2012-11-08 12:09:39	121.34	125.71	10.8217	-123.69	-128.145
2012-11-08 12:19:39	121.76	126.08	10.8287	-124.118	-128.522
2012-11-08 12:29:39	122.13	126.5	10.8356	-124.495	-128.95
2012-11-08 12:39:39	122.36	126.91	10.8426	-124.73	-129.368
2012-11-08 12:49:39	122.9	127.36	10.8495	-125.28	-129.827	2012-11-08 12:49:39
2012-11-08 12:59:39	123.27	127.71	10.8564	-125.657	-130.183
2012-11-08 13:09:39	123.68	128.02	10.8634	-126.075	-130.499
2012-11-08 13:19:39	124.03	128.39	10.8703	-126.432	-130.877
2012-11-08 13:29:39	124.36	128.76	10.8773	-126.769	-131.254
2012-11-08 13:39:39	124.74	129.1	10.8842	-127.156	-131.6
2012-11-08 13:49:39	125.1	129.6	10.8912	-127.523	-132.11	2012-11-08 13:49:39
2012-11-08 13:59:39	125.46	129.94	10.8981	-127.89	-132.457
2012-11-08 14:09:39	125.88	130.24	10.9051	-128.318	-132.762
2012-11-08 14:19:39	126.22	130.63	10.912	-128.665	-133.16
2012-11-08 14:29:39	126.56	131	10.9189	-129.011	-133.537
2012-11-08 14:39:39	126.92	131.44	10.9259	-129.378	-133.986
2012-11-08 14:49:39	126.77	131.38	10.9328	-129.225	-133.925	2012-11-08 14:49:39
2012-11-08 14:59:39	127.41	131.97	10.9398	-129.878	-134.526
2012-11-08 15:09:39	127.79	132.36	10.9467	-130.265	-134.924
2012-11-08 15:19:39	128.18	132.74	10.9537	-130.663	-135.311
2012-11-08 15:29:39	128.58	133.16	10.9606	-131.07	-135.739
2012-11-08 15:39:39	128.95	133.56	10.9676	-131.448	-136.147
2012-11-08 15:49:39	129.34	133.87	10.9745	-131.845	-136.463	2012-11-08 15:49:39
2012-11-08 15:59:39	129.74	134.35	10.9814	-132.253	-136.952
2012-11-08 16:09:39	130.09	134.6	10.9884	-132.61	-137.207
2012-11-08 16:19:39	130.48	135.06	10.9953	-133.007	-137.676
2012-11-08 16:29:39	130.82	135.42	11.0023	-133.354	-138.043
2012-11-08 16:39:39	131.21	135.83	11.0092	-133.751	-138.461
2012-11-08 16:49:39	131.56	136.22	11.0162	-134.108	-138.858	2012-11-08 16:49:39
2012-11-08 16:59:39	131.99	136.63	11.0231	-134.546	-139.276
2012-11-08 17:09:39	132.33	136.99	11.0301	-134.893	-139.643
2012-11-08 17:19:39	132.7	137.32	11.037	-135.27	-139.98
2012-11-08 17:29:39	133.11	137.75	11.0439	-135.688	-140.418
2012-11-08 17:39:39	133.46	138.1	11.0509	-136.045	-140.775
2012-11-08 17:49:39	133.74	138.38	11.0578	-136.33	-141.06	2012-11-08 17:49:39
2012-11-08 17:59:39	134.13	138.77	11.0648	-136.728	-141.458
2012-11-08 18:09:39	134.48	139.13	11.0717	-137.085	-141.825
2012-11-08 18:19:39	134.77	139.53	11.0787	-137.38	-142.232
2012-11-08 18:29:39	135.17	139.89	11.0856	-137.788	-142.599
2012-11-08 18:39:39	135.45	140.2	11.0926	-138.073	-142.915
2012-11-08 18:49:39	135.81	140.6	11.0995	-138.44	-143.323	2012-11-08 18:49:39
2012-11-08 18:59:39	136.18	141.05	11.1064	-138.818	-143.782
2012-11-08 19:09:39	136.56	141.5	11.1134	-139.205	-144.241
2012-11-08 19:19:39	136.93	141.95	11.1203	-139.582	-144.699
2012-11-08 19:29:39	137.28	142.3	11.1273	-139.939	-145.056
2012-11-08 19:39:39	137.7	142.74	11.1342	-140.367	-145.505
2012-11-08 19:49:39	138.06	143.15	11.1412	-140.734	-145.923	2012-11-08 19:49:39
2012-11-08 19:59:39	138.44	143.53	11.1481	-141.121	-146.31
2012-11-08 20:09:39	138.8	143.97	11.1551	-141.488	-146.758
2012-11-08 20:19:39	139.2	144.38	11.162	-141.896	-147.176
2012-11-08 20:29:39	139.54	144.75	11.1689	-142.243	-147.554
2012-11-08 20:39:39	139.96	145.09	11.1759	-142.671	-147.9
2012-11-08 20:49:39	140.33	145.5	11.1828	-143.048	-148.318	2012-11-08 20:49:39
2012-11-08 20:59:39	140.7	145.91	11.1898	-143.425	-148.736
2012-11-08 21:09:39	141.05	146.23	11.1967	-143.782	-149.062
2012-11-08 21:19:39	141.41	146.56	11.2037	-144.149	-149.399
2012-11-08 21:29:39	141.76	146.98	11.2106	-144.506	-149.827
2012-11-08 21:39:39	142.1	147.39	11.2176	-144.852	-150.245
2012-11-08 21:49:39	142.46	147.78	11.2245	-145.219	-150.642	2012-11-08 21:49:39
2012-11-08 21:59:39	142.82	148.09	11.2314	-145.586	-150.958
2012-11-08 22:09:39	143.14	148.48	11.2384	-145.912	-151.356
2012-11-08 22:19:39	143.45	148.87	11.2453	-146.228	-151.753
2012-11-08 22:29:39	143.84	149.2	11.2523	-146.626	-152.09
2012-11-08 22:39:39	144.19	149.58	11.2592	-146.983	-152.477
2012-11-08 22:49:39	144.54	149.9	11.2662	-147.339	-152.803	2012-11-08 22:49:39
2012-11-08 22:59:39	144.86	150.28	11.2731	-147.666	-153.191
2012-11-08 23:09:39	145.2	150.62	11.2801	-148.012	-153.537
2012-11-08 23:19:39	145.51	150.99	11.287	-148.328	-153.914
2012-11-08 23:29:39	145.84	151.29	11.2939	-148.665	-154.22
2012-11-08 23:39:39	146.14	151.61	11.3009	-148.97	-154.546
2012-11-08 23:49:39	146.47	151.95	11.3078	-149.307	-154.893	2012-11-08 23:49:39
2012-11-08 23:59:39	146.8	152.28	11.3148	-149.643	-155.229
2012-11-09 00:09:39	147.1	152.6	11.3217	-149.949	-155.556
2012-11-09 00:19:39	147.41	152.9	11.3287	-150.265	-155.861
2012-11-09 00:29:39	147.7	153.22	11.3356	-150.561	-156.188
2012-11-09 00:39:39	147.97	153.52	11.3426	-150.836	-156.493
2012-11-09 00:49:39	148.3	153.86	11.3495	-151.172	-156.84	2012-11-09 00:49:39
2012-11-09 00:59:39	148.59	154.12	11.3564	-151.468	-157.105
2012-11-09 01:09:39	148.9	154.44	11.3634	-151.784	-157.431
2012-11-09 01:19:39	149.22	154.81	11.3703	-152.11	-157.808
2012-11-09 01:29:39	149.52	155.09	11.3773	-152.416	-158.094
2012-11-09 01:39:39	149.8	155.43	11.3842	-152.701	-158.44
2012-11-09 01:49:39	150.06	155.66	11.3912	-152.966	-158.675	2012-11-09 01:49:39
2012-11-09 01:59:39	150.37	156.04	11.3981	-153.282	-159.062
2012-11-09 02:09:39	150.67	156.34	11.4051	-153.588	-159.368
2012-11-09 02:19:39	150.94	156.7	11.412	-153.863	-159.735
2012-11-09 02:29:39	151.22	157	11.4189	-154.149	-160.041
2012-11-09 02:39:39	151.51	157.24	11.4259	-154.444	-160.285
2012-11-09 02:49:39	151.78	157.52	11.4328	-154.72	-160.571	2012-11-09 02:49:39
2012-11-09 02:59:39	152.03	157.8	11.4398	-154.975	-160.856
2012-11-09 03:09:39	152.31	158.02	11.4467	-155.26	-161.081
2012-11-09 03:19:39	152.59	158.31	11.4537	-155.545	-161.376
2012-11-09 03:29:39	152.86	158.62	11.4606	-155.821	-161.692
2012-11-09 03:39:39	153.11	158.92	11.4676	-156.075	-161.998
2012-11-09 03:49:39	153.37	159.2	11.4745	-156.34	-162.283	2012-11-09 03:49:39
2012-11-09 03:59:39	153.64	159.48	11.4814	-156.616	-162.569
2012-11-09 04:09:39	153.88	159.75	11.4884	-156.86	-162.844
2012-11-09 04:19:39	154.17	160.04	11.4953	-157.156	-163.14
2012-11-09 04:29:39	154.39	160.3	11.5023	-157.38	-163.405
2012-11-09 04:39:39	154.64	160.56	11.5092	-157.635	-163.67
2012-11-09 04:49:39	154.89	160.81	11.5162	-157.89	-163.925	2012-11-09 04:49:39
2012-11-09 04:59:39	155.12	161.09	11.5231	-158.124	-164.21
2012-11-09 05:09:39	155.38	161.36	11.5301	-158.389	-164.485
2012-11-09 05:19:39	155.61	161.59	11.537	-158.624	-164.72
2012-11-09 05:29:39	155.84	161.83	11.5439	-158.858	-164.964
2012-11-09 05:39:39	156.1	162.1	11.5509	-159.123	-165.24
2012-11-09 05:49:39	156.34	162.33	11.5578	-159.368	-165.474	2012-11-09 05:49:39
2012-11-09 05:59:39	156.57	162.6	11.5648	-159.602	-165.749
2012-11-09 06:09:39	156.82	162.86	11.5717	-159.857	-166.014
2012-11-09 06:19:39	156.86	163.07	11.5787	-159.898	-166.228
2012-11-09 06:29:39	157.27	163.33	11.5856	-160.316	-166.493
2012-11-09 06:39:39	157.49	163.61	11.5926	-160.54	-166.779
2012-11-09 06:49:39	157.68	163.8	11.5995	-160.734	-166.972	2012-11-09 06:49:39
2012-11-09 06:59:39	157.92	164.06	11.6064	-160.979	-167.238
2012-11-09 07:09:39	158.15	164.28	11.6134	-161.213	-167.462
2012-11-09 07:19:39	158.36	164.49	11.6203	-161.427	-167.676
2012-11-09 07:29:39	158.58	164.74	11.6273	-161.651	-167.931
2012-11-09 07:39:39	158.78	164.98	11.6342	-161.855	-168.175
2012-11-09 07:49:39	158.94	165.06	11.6412	-162.018	-168.257	2012-11-09 07:49:39
2012-11-09 07:59:39	159.14	165.1	11.6481	-162.222	-168.298
2012-11-09 08:09:39	159.3	165.29	11.6551	-162.385	-168.491
2012-11-09 08:19:39	159.46	165.42	11.662	-162.548	-168.624
2012-11-09 08:29:39	156.06	163.99	11.6689	-159.083	-167.166
2012-11-09 08:39:39	159.72	165.67	11.6759	-162.813	-168.879
2012-11-09 08:49:39	159.88	165.8	11.6828	-162.977	-169.011	2012-11-09 08:49:39
2012-11-09 08:59:39	160.04	166.02	11.6898	-163.14	-169.235
2012-11-09 09:09:39	159.79	166.08	11.6967	-162.885	-169.297
2012-11-09 09:19:39	160.31	166.52	11.7037	-163.415	-169.745
2012-11-09 09:29:39	160.5	166.76	11.7106	-163.609	-169.99
2012-11-09 09:39:39	160.7	166.99	11.7176	-163.812	-170.224
2012-11-09 09:49:39	160.88	167.14	11.7245	-163.996	-170.377	2012-11-09 09:49:39
2012-11-09 09:59:39	161.07	167.31	11.7314	-164.19	-170.55
2012-11-09 10:09:39	161.25	167.47	11.7384	-164.373	-170.714
2012-11-09 10:19:39	161.42	167.69	11.7453	-164.546	-170.938
2012-11-09 10:29:39	161.6	167.82	11.7523	-164.73	-171.07
2012-11-09 10:39:39	161.74	168.11	11.7592	-164.873	-171.366
2012-11-09 10:49:39	161.92	168.19	11.7662	-165.056	-171.448	2012-11-09 10:49:39
2012-11-09 10:59:39	162.09	168.43	11.7731	-165.229	-171.692
2012-11-09 11:09:39	162.27	168.69	11.7801	-165.413	-171.957
2012-11-09 11:19:39	162.44	168.88	11.787	-165.586	-172.151
2012-11-09 11:29:39	162.61	169.05	11.7939	-165.759	-172.324
2012-11-09 11:39:39	162.8	169.24	11.8009	-165.953	-172.518
2012-11-09 11:49:39	162.96	169.42	11.8078	-166.116	-172.701	2012-11-09 11:49:39
2012-11-09 11:59:39	163.13	169.69	11.8148	-166.29	-172.977
2012-11-09 12:09:39	163.3	169.84	11.8217	-166.463	-173.129
2012-11-09 12:19:39	163.41	170.03	11.8287	-166.575	-173.323
2012-11-09 12:29:39	163.63	170.2	11.8356	-166.799	-173.496
2012-11-09 12:39:39	163.8	170.4	11.8426	-166.972	-173.7
2012-11-09 12:49:39	163.96	170.6	11.8495	-167.136	-173.904	2012-11-09 12:49:39
2012-11-09 12:59:39	164.12	170.79	11.8564	-167.299	-174.098
2012-11-09 13:09:39	164.27	171.01	11.8634	-167.452	-174.322
2012-11-09 13:19:39	164.42	171.24	11.8703	-167.604	-174.557
2012-11-09 13:29:39	164.59	171.38	11.8773	-167.778	-174.699
2012-11-09 13:39:39	164.77	171.63	11.8842	-167.961	-174.954
2012-11-09 13:49:39	164.94	171.8	11.8912	-168.135	-175.127	2012-11-09 13:49:39
2012-11-09 13:59:39	165.1	171.8	11.8981	-168.298	-175.127
2012-11-09 14:09:39	165.23	171.98	11.9051	-168.43	-175.311
2012-11-09 14:19:39	165.34	172.07	11.912	-168.542	-175.403
2012-11-09 14:29:39	165.1	171.65	11.9189	-168.298	-174.975
2012-11-09 14:39:39	165.4	172.04	11.9259	-168.603	-175.372
2012-11-09 14:49:39	165.55	172.39	11.9328	-168.756	-175.729	2012-11-09 14:49:39
2012-11-09 14:59:39	165.72	172.6	11.9398	-168.93	-175.943
2012-11-09 15:09:39	165.89	172.84	11.9467	-169.103	-176.188
2012-11-09 15:19:39	166.06	173.06	11.9537	-169.276	-176.412
2012-11-09 15:29:39	166.21	173.27	11.9606	-169.429	-176.626
2012-11-09 15:39:39	166.39	173.41	11.9676	-169.613	-176.769
2012-11-09 15:49:39	166.55	173.61	11.9745	-169.776	-176.972	2012-11-09 15:49:39
2012-11-09 15:59:39	166.7	173.78	11.9814	-169.929	-177.146
2012-11-09 16:09:39	166.87	173.99	11.9884	-170.102	-177.36
2012-11-09 16:19:39	167.01	174.16	11.9953	-170.245	-177.533
2012-11-09 16:29:39	167.19	174.33	12.0023	-170.428	-177.706
2012-11-09 16:39:39	167.34	174.49	12.0092	-170.581	-177.87
2012-11-09 16:49:39	167.5	174.71	12.0162	-170.744	-178.094	2012-11-09 16:49:39
2012-11-09 16:59:39	167.64	174.92	12.0231	-170.887	-178.308
2012-11-09 17:09:39	167.78	175.08	12.0301	-171.03	-178.471
2012-11-09 17:19:39	167.93	175.26	12.037	-171.182	-178.654
2012-11-09 17:29:39	168.07	175.4	12.0439	-171.325	-178.797
2012-11-09 17:39:39	168.22	175.58	12.0509	-171.478	-178.981
2012-11-09 17:49:39	168.35	175.69	12.0578	-171.611	-179.093	2012-11-09 17:49:39
2012-11-09 17:59:39	168.48	175.88	12.0648	-171.743	-179.286
2012-11-09 18:09:39	168.62	176.05	12.0717	-171.886	-179.46
2012-11-09 18:19:39	168.76	176.23	12.0787	-172.029	-179.643
2012-11-09 18:29:39	168.91	176.42	12.0856	-172.181	-179.837
2012-11-09 18:39:39	169.02	176.6	12.0926	-172.294	-180.02
2012-11-09 18:49:39	169.18	176.75	12.0995	-172.457	-180.173	2012-11-09 18:49:39
2012-11-09 18:59:39	169.32	176.91	12.1064	-172.599	-180.336
2012-11-09 19:09:39	169.45	177.07	12.1134	-172.732	-180.499
2012-11-09 19:19:39	169.58	177.27	12.1203	-172.864	-180.703
2012-11-09 19:29:39	169.7	177.34	12.1273	-172.987	-180.775
2012-11-09 19:39:39	169.83	177.54	12.1342	-173.119	-180.979
2012-11-09 19:49:39	169.97	177.7	12.1412	-173.262	-181.142	2012-11-09 19:49:39
2012-11-09 19:59:39	170.11	177.85	12.1481	-173.405	-181.295
2012-11-09 20:09:39	170.24	178.05	12.1551	-173.537	-181.498
2012-11-09 20:19:39	170.34	178.21	12.162	-173.639	-181.662
2012-11-09 20:29:39	170.51	178.4	12.1689	-173.812	-181.855
2012-11-09 20:39:39	170.63	178.55	12.1759	-173.935	-182.008
2012-11-09 20:49:39	170.75	178.66	12.1828	-174.057	-182.12	2012-11-09 20:49:39
2012-11-09 20:59:39	170.87	178.85	12.1898	-174.179	-182.314
2012-11-09 21:09:39	171	178.96	12.1967	-174.312	-182.426
2012-11-09 21:19:39	171.12	179.14	12.2037	-174.434	-182.61
2012-11-09 21:29:39	171.27	179.32	12.2106	-174.587	-182.793
2012-11-09 21:39:39	171.38	179.43	12.2176	-174.699	-182.905
2012-11-09 21:49:39	171.52	179.62	12.2245	-174.842	-183.099	2012-11-09 21:49:39
2012-11-09 21:59:39	171.62	179.75	12.2314	-174.944	-183.231
2012-11-09 22:09:39	171.73	179.91	12.2384	-175.056	-183.394
2012-11-09 22:19:39	171.84	180.06	12.2453	-175.168	-183.547
2012-11-09 22:29:39	171.97	180.22	12.2523	-175.301	-183.71
2012-11-09 22:39:39	172.09	180.32	12.2592	-175.423	-183.812
2012-11-09 22:49:39	172.21	180.48	12.2662	-175.545	-183.976	2012-11-09 22:49:39
2012-11-09 22:59:39	172.34	180.7	12.2731	-175.678	-184.2
2012-11-09 23:09:39	172.45	180.8	12.2801	-175.79	-184.302
2012-11-09 23:19:39	172.56	180.97	12.287	-175.902	-184.475
2012-11-09 23:29:39	172.69	181.12	12.2939	-176.035	-184.628
2012-11-09 23:39:39	172.82	181.25	12.3009	-176.167	-184.76
2012-11-09 23:49:39	172.92	181.43	12.3078	-176.269	-184.944	2012-11-09 23:49:39
2012-11-09 23:59:39	173.07	181.52	12.3148	-176.422	-185.036
2012-11-10 00:09:39	173.15	181.71	12.3217	-176.504	-185.229
2012-11-10 00:19:39	173.28	181.87	12.3287	-176.636	-185.392
2012-11-10 00:29:39	173.39	182.06	12.3356	-176.748	-185.586
2012-11-10 00:39:39	173.5	182.18	12.3426	-176.86	-185.708
2012-11-10 00:49:39	173.61	182.3	12.3495	-176.972	-185.831	2012-11-10 00:49:39
2012-11-10 00:59:39	173.71	182.45	12.3564	-177.074	-185.984
2012-11-10 01:09:39	173.84	182.61	12.3634	-177.207	-186.147
2012-11-10 01:19:39	173.93	182.78	12.3703	-177.299	-186.32
2012-11-10 01:29:39	174.05	182.91	12.3773	-177.421	-186.453
2012-11-10 01:39:39	174.15	182.98	12.3842	-177.523	-186.524
2012-11-10 01:49:39	174.26	183.21	12.3912	-177.635	-186.758	2012-11-10 01:49:39
2012-11-10 01:59:39	174.38	183.32	12.3981	-177.757	-186.871
2012-11-10 02:09:39	174.47	183.5	12.4051	-177.849	-187.054
2012-11-10 02:19:39	174.57	183.6	12.412	-177.951	-187.156
2012-11-10 02:29:39	174.69	183.6	12.4189	-178.073	-187.156
2012-11-10 02:39:39	174.79	183.92	12.4259	-178.175	-187.482
2012-11-10 02:49:39	174.89	184.08	12.4328	-178.277	-187.645	2012-11-10 02:49:39
2012-11-10 02:59:39	174.99	184.24	12.4398	-178.379	-187.808
2012-11-10 03:09:39	175.08	184.34	12.4467	-178.471	-187.91
2012-11-10 03:19:39	175.21	184.5	12.4537	-178.603	-188.073
2012-11-10 03:29:39	175.31	184.65	12.4606	-178.705	-188.226
2012-11-10 03:39:39	175.4	184.79	12.4676	-178.797	-188.369
2012-11-10 03:49:39	175.5	184.94	12.4745	-178.899	-188.522	2012-11-10 03:49:39
2012-11-10 03:59:39	175.6	185.05	12.4814	-179.001	-188.634
2012-11-10 04:09:39	175.69	185.24	12.4884	-179.093	-188.828
2012-11-10 04:19:39	175.79	185.39	12.4953	-179.195	-188.981
2012-11-10 04:29:39	175.89	185.51	12.5023	-179.297	-189.103
2012-11-10 04:39:39	175.99	185.66	12.5092	-179.399	-189.256
2012-11-10 04:49:39	176.09	185.81	12.5162	-179.501	-189.409	2012-11-10 04:49:39
2012-11-10 04:59:39	176.19	185.94	12.5231	-179.602	-189.541
2012-11-10 05:09:39	176.28	186.11	12.5301	-179.694	-189.715
2012-11-10 05:19:39	176.38	186.26	12.537	-179.796	-189.867
2012-11-10 05:29:39	176.44	186.29	12.5439	-179.857	-189.898
2012-11-10 05:39:39	176.55	186.47	12.5509	-179.969	-190.082
2012-11-10 05:49:39	176.66	186.65	12.5578	-180.082	-190.265	2012-11-10 05:49:39
2012-11-10 05:59:39	176.72	186.8	12.5648	-180.143	-190.418
2012-11-10 06:09:39	176.78	186.94	12.5717	-180.204	-190.561
2012-11-10 06:19:39	176.85	187.1	12.5787	-180.275	-190.724
2012-11-10 06:29:39	176.99	187.29	12.5856	-180.418	-190.917
2012-11-10 06:39:39	177.1	187.37	12.5926	-180.53	-190.999
2012-11-10 06:49:39	177.18	187.53	12.5995	-180.612	-191.162	2012-11-10 06:49:39
2012-11-10 06:59:39	177.28	187.66	12.6064	-180.714	-191.295
2012-11-10 07:09:39	177.38	187.82	12.6134	-180.815	-191.458
2012-11-10 07:19:39	177.46	187.9	12.6203	-180.897	-191.539
2012-11-10 07:29:39	177.56	188.11	12.6273	-180.999	-191.753
2012-11-10 07:39:39	177.64	188.25	12.6342	-181.081	-191.896
2012-11-10 07:49:39	177.76	188.43	12.6412	-181.203	-192.08	2012-11-10 07:49:39
2012-11-10 07:59:39	177.85	188.55	12.6481	-181.295	-192.202
2012-11-10 08:09:39	177.95	188.71	12.6551	-181.397	-192.365
2012-11-10 08:19:39	178.03	188.85	12.662	-181.478	-192.508
2012-11-10 08:29:39	178.13	189.11	12.6689	-181.58	-192.773
2012-11-10 08:39:39	178.21	189.24	12.6759	-181.662	-192.905
2012-11-10 08:49:39	178.33	189.15	12.6828	-181.784	-192.813	2012-11-10 08:49:39
2012-11-10 08:59:39	178.41	189.33	12.6898	-181.865	-192.997
2012-11-10 09:09:39	178.49	189.59	12.6967	-181.947	-193.262
2012-11-10 09:19:39	178.6	189.76	12.7037	-182.059	-193.435
2012-11-10 09:29:39	178.68	189.9	12.7106	-182.141	-193.578
2012-11-10 09:39:39	178.79	190.02	12.7176	-182.253	-193.7
2012-11-10 09:49:39	178.76	190.21	12.7245	-182.222	-193.894	2012-11-10 09:49:39
2012-11-10 09:59:39	178.94	190.36	12.7314	-182.406	-194.047
2012-11-10 10:09:39	179.05	190.44	12.7384	-182.518	-194.128
2012-11-10 10:19:39	179.13	190.6	12.7453	-182.599	-194.292
2012-11-10 10:29:39	179.19	190.67	12.7523	-182.661	-194.363
2012-11-10 10:39:39	179.23	190.7	12.7592	-182.701	-194.393
2012-11-10 10:49:39	179.26	190.94	12.7662	-182.732	-194.638	2012-11-10 10:49:39
2012-11-10 10:59:39	179.36	191.12	12.7731	-182.834	-194.822
2012-11-10 11:09:39	179.44	191.34	12.7801	-182.915	-195.046
2012-11-10 11:19:39	179.5	191.47	12.787	-182.977	-195.178
2012-11-10 11:29:39	179.59	191.61	12.7939	-183.068	-195.321
2012-11-10 11:39:39	179.69	191.92	12.8009	-183.17	-195.637
2012-11-10 11:49:39	179.78	192.06	12.8078	-183.262	-195.78	2012-11-10 11:49:39
2012-11-10 11:59:39	179.87	191.94	12.8148	-183.354	-195.657
2012-11-10 12:09:39	179.96	192.37	12.8217	-183.445	-196.096
2012-11-10 12:19:39	180.05	192.53	12.8287	-183.537	-196.259
2012-11-10 12:29:39	180.14	192.64	12.8356	-183.629	-196.371
2012-11-10 12:39:39	180.24	192.92	12.8426	-183.731	-196.656
2012-11-10 12:49:39	180.32	193.11	12.8495	-183.812	-196.85	2012-11-10 12:49:39
2012-11-10 12:59:39	180.41	193.23	12.8564	-183.904	-196.972
2012-11-10 13:09:39	180.49	193.41	12.8634	-183.986	-197.156
2012-11-10 13:19:39	180.57	193.64	12.8703	-184.067	-197.39
2012-11-10 13:29:39	180.65	193.81	12.8773	-184.149	-197.564
2012-11-10 13:39:39	180.76	193.98	12.8842	-184.261	-197.737
2012-11-10 13:49:39	180.87	194.16	12.8912	-184.373	-197.92	2012-11-10 13:49:39
2012-11-10 13:59:39	180.94	194.36	12.8981	-184.444	-198.124
2012-11-10 14:09:39	181.01	194.46	12.9051	-184.516	-198.226
2012-11-10 14:19:39	181.09	194.72	12.912	-184.597	-198.491
2012-11-10 14:29:39	181.21	194.92	12.9189	-184.72	-198.695
2012-11-10 14:39:39	181.27	195.07	12.9259	-184.781	-198.848
2012-11-10 14:49:39	181.4	195.22	12.9328	-184.913	-199.001	2012-11-10 14:49:39
2012-11-10 14:59:39	181.5	195.47	12.9398	-185.015	-199.256
2012-11-10 15:09:39	181.56	195.43	12.9467	-185.076	-199.215
2012-11-10 15:19:39	181.64	195.48	12.9537	-185.158	-199.266
2012-11-10 15:29:39	181.69	195.54	12.9606	-185.209	-199.327
2012-11-10 15:39:39	181.74	195.71	12.9676	-185.26	-199.501
2012-11-10 15:49:39	181.49	195.41	12.9745	-185.005	-199.195	2012-11-10 15:49:39
2012-11-10 15:59:39	181.75	196.1	12.9814	-185.27	-199.898
2012-11-10 16:09:39	181.85	196.26	12.9884	-185.372	-200.061
2012-11-10 16:19:39	181.93	196.6	12.9953	-185.454	-200.408
2012-11-10 16:29:39	182.03	196.85	13.0023	-185.556	-200.663
2012-11-10 16:39:39	182.13	197.11	13.0092	-185.657	-200.928
2012-11-10 16:49:39	182.23	197.31	13.0162	-185.759	-201.131	2012-11-10 16:49:39
2012-11-10 16:59:39	182.36	197.59	13.0231	-185.892	-201.417
2012-11-10 17:09:39	182.46	197.61	13.0301	-185.994	-201.437
2012-11-10 17:19:39	182.57	198.02	13.037	-186.106	-201.855
2012-11-10 17:29:39	182.67	198.28	13.0439	-186.208	-202.12
2012-11-10 17:39:39	182.78	198.47	13.0509	-186.32	-202.314
2012-11-10 17:49:39	182.87	198.74	13.0578	-186.412	-202.589	2012-11-10 17:49:39
2012-11-10 17:59:39	182.99	198.93	13.0648	-186.534	-202.783
2012-11-10 18:09:39	183.1	199.11	13.0717	-186.646	-202.966
2012-11-10 18:19:39	183.17	199.33	13.0787	-186.718	-203.191
2012-11-10 18:29:39	183.28	199.57	13.0856	-186.83	-203.435
2012-11-10 18:39:39	183.38	199.82	13.0926	-186.932	-203.69
2012-11-10 18:49:39	183.48	200.05	13.0995	-187.034	-203.925	2012-11-10 18:49:39
2012-11-10 18:59:39	183.58	200.27	13.1064	-187.136	-204.149
2012-11-10 19:09:39	183.68	200.46	13.1134	-187.238	-204.343
2012-11-10 19:19:39	183.79	200.67	13.1203	-187.35	-204.557
2012-11-10 19:29:39	183.88	200.92	13.1273	-187.441	-204.811
2012-11-10 19:39:39	183.97	201.16	13.1342	-187.533	-205.056
2012-11-10 19:49:39	184.09	201.38	13.1412	-187.655	-205.28	2012-11-10 19:49:39
2012-11-10 19:59:39	184.16	201.61	13.1481	-187.727	-205.515
2012-11-10 20:09:39	184.18	201.83	13.1551	-187.747	-205.739
2012-11-10 20:19:39	184.35	202.1	13.162	-187.92	-206.014
2012-11-10 20:29:39	184.43	202.37	13.1689	-188.002	-206.29
2012-11-10 20:39:39	184.53	202.58	13.1759	-188.104	-206.504
2012-11-10 20:49:39	184.65	202.87	13.1828	-188.226	-206.799	2012-11-10 20:49:39
2012-11-10 20:59:39	184.75	203.06	13.1898	-188.328	-206.993
2012-11-10 21:09:39	184.86	203.38	13.1967	-188.44	-207.319
2012-11-10 21:19:39	184.95	203.62	13.2037	-188.532	-207.564
2012-11-10 21:29:39	185.03	203.88	13.2106	-188.614	-207.829
2012-11-10 21:39:39	185.16	204.13	13.2176	-188.746	-208.084
2012-11-10 21:49:39	185.23	204.37	13.2245	-188.818	-208.328	2012-11-10 21:49:39
2012-11-10 21:59:39	185.34	204.65	13.2314	-188.93	-208.614
2012-11-10 22:09:39	183.02	202.64	13.2384	-186.565	-206.565
2012-11-10 22:19:39	185.49	205.1	13.2453	-189.083	-209.072
2012-11-10 22:29:39	185.61	205.46	13.2523	-189.205	-209.439
2012-11-10 22:39:39	185.72	205.78	13.2592	-189.317	-209.766
2012-11-10 22:49:39	185.79	205.98	13.2662	-189.388	-209.969	2012-11-10 22:49:39
2012-11-10 22:59:39	185.89	206.32	13.2731	-189.49	-210.316
2012-11-10 23:09:39	186	206.6	13.2801	-189.602	-210.601
2012-11-10 23:19:39	186.1	206.91	13.287	-189.704	-210.917
2012-11-10 23:29:39	186.18	207.12	13.2939	-189.786	-211.131
2012-11-10 23:39:39	186.27	207.42	13.3009	-189.878	-211.437
2012-11-10 23:49:39	186.37	207.7	13.3078	-189.98	-211.723	2012-11-10 23:49:39
2012-11-10 23:59:39	186.45	207.95	13.3148	-190.061	-211.978
2012-11-11 00:09:39	186.53	208.25	13.3217	-190.143	-212.283
2012-11-11 00:19:39	186.63	208.48	13.3287	-190.245	-212.518
2012-11-11 00:29:39	186.71	208.8	13.3356	-190.326	-212.844
2012-11-11 00:39:39	186.78	209.03	13.3426	-190.398	-213.078
2012-11-11 00:49:39	186.88	209.35	13.3495	-190.499	-213.405	2012-11-11 00:49:39
2012-11-11 00:59:39	186.97	209.59	13.3564	-190.591	-213.649
2012-11-11 01:09:39	187.06	210.02	13.3634	-190.683	-214.088
2012-11-11 01:19:39	187.14	210.22	13.3703	-190.765	-214.292
2012-11-11 01:29:39	187.23	210.56	13.3773	-190.856	-214.638
2012-11-11 01:39:39	187.33	210.83	13.3842	-190.958	-214.913
2012-11-11 01:49:39	187.42	211.12	13.3912	-191.05	-215.209	2012-11-11 01:49:39
2012-11-11 01:59:39	187.52	211.37	13.3981	-191.152	-215.464
2012-11-11 02:09:39	187.61	211.64	13.4051	-191.244	-215.739
2012-11-11 02:19:39	187.69	212.01	13.412	-191.325	-216.116
2012-11-11 02:29:39	187.76	212.32	13.4189	-191.397	-216.432
2012-11-11 02:39:39	187.86	212.55	13.4259	-191.498	-216.667
2012-11-11 02:49:39	187.96	213.07	13.4328	-191.6	-217.197	2012-11-11 02:49:39
2012-11-11 02:59:39	188.03	213.32	13.4398	-191.672	-217.452
2012-11-11 03:09:39	188.15	213.66	13.4467	-191.794	-217.798
2012-11-11 03:19:39	188.18	213.99	13.4537	-191.825	-218.135
2012-11-11 03:29:39	188.28	214.34	13.4606	-191.927	-218.491
2012-11-11 03:39:39	188.34	214.59	13.4676	-191.988	-218.746
2012-11-11 03:49:39	188.48	214.96	13.4745	-192.13	-219.123	2012-11-11 03:49:39
2012-11-11 03:59:39	188.56	215.24	13.4814	-192.212	-219.409
2012-11-11 04:09:39	188.65	215.55	13.4884	-192.304	-219.725
2012-11-11 04:19:39	188.73	215.93	13.4953	-192.385	-220.112
2012-11-11 04:29:39	188.82	216.26	13.5023	-192.477	-220.449
2012-11-11 04:39:39	188.91	216.68	13.5092	-192.569	-220.877
2012-11-11 04:49:39	189	217	13.5162	-192.661	-221.203	2012-11-11 04:49:39
2012-11-11 04:59:39	189.11	217.32	13.5231	-192.773	-221.529
2012-11-11 05:09:39	189.21	217.66	13.5301	-192.875	-221.876
2012-11-11 05:19:39	189.3	218.09	13.537	-192.966	-222.314
2012-11-11 05:29:39	189.39	218.58	13.5439	-193.058	-222.813
2012-11-11 05:39:39	189.49	218.96	13.5509	-193.16	-223.201
2012-11-11 05:49:39	189.57	219.29	13.5578	-193.242	-223.537	2012-11-11 05:49:39
2012-11-11 05:59:39	189.67	219.55	13.5648	-193.344	-223.802
2012-11-11 06:09:39	189.75	220.01	13.5717	-193.425	-224.271
2012-11-11 06:19:39	189.84	220.35	13.5787	-193.517	-224.618
2012-11-11 06:29:39	189.89	220.84	13.5856	-193.568	-225.117
2012-11-11 06:39:39	190.01	221.09	13.5926	-193.69	-225.372
2012-11-11 06:49:39	190.12	221.69	13.5995	-193.802	-225.984	2012-11-11 06:49:39
2012-11-11 06:59:39	190.19	221.98	13.6064	-193.874	-226.279
2012-11-11 07:09:39	190.32	222.48	13.6134	-194.006	-226.789
2012-11-11 07:19:39	190.39	222.65	13.6203	-194.077	-226.962
2012-11-11 07:29:39	190.49	223.29	13.6273	-194.179	-227.615
2012-11-11 07:39:39	190.58	223.82	13.6342	-194.271	-228.155
2012-11-11 07:49:39	190.67	224.17	13.6412	-194.363	-228.512	2012-11-11 07:49:39
2012-11-11 07:59:39	190.77	224.49	13.6481	-194.465	-228.838
2012-11-11 08:09:39	190.86	225.05	13.6551	-194.557	-229.409
2012-11-11 08:19:39	190.95	225.38	13.662	-194.648	-229.745
2012-11-11 08:29:39	191.03	225.92	13.6689	-194.73	-230.296
2012-11-11 08:39:39	191.13	226.32	13.6759	-194.832	-230.703
2012-11-11 08:49:39	191.21	226.74	13.6828	-194.913	-231.131	2012-11-11 08:49:39
2012-11-11 08:59:39	191.3	227.21	13.6898	-195.005	-231.611
2012-11-11 09:09:39	191.38	227.77	13.6967	-195.087	-232.181
2012-11-11 09:19:39	191.47	227.81	13.7037	-195.178	-232.222
2012-11-11 09:29:39	191.54	228.79	13.7106	-195.25	-233.221
2012-11-11 09:39:39	191.65	229.32	13.7176	-195.362	-233.761
2012-11-11 09:49:39	191.73	229.78	13.7245	-195.443	-234.23	2012-11-11 09:49:39
2012-11-11 09:59:39	191.83	230.19	13.7314	-195.545	-234.648
2012-11-11 10:09:39	191.92	230.83	13.7384	-195.637	-235.301
2012-11-11 10:19:39	192.01	231.41	13.7453	-195.729	-235.892
2012-11-11 10:29:39	192.1	231.91	13.7523	-195.821	-236.402
2012-11-11 10:39:39	192.19	232.48	13.7592	-195.912	-236.983
2012-11-11 10:49:39	192.3	233.08	13.7662	-196.024	-237.594	2012-11-11 10:49:39
2012-11-11 10:59:39	192.39	233.59	13.7731	-196.116	-238.114
2012-11-11 11:09:39	192.51	234.18	13.7801	-196.239	-238.716
2012-11-11 11:19:39	192.6	234.61	13.787	-196.33	-239.154
2012-11-11 11:29:39	192.69	235.34	13.7939	-196.422	-239.898
2012-11-11 11:39:39	192.79	235.89	13.8009	-196.524	-240.459
2012-11-11 11:49:39	192.88	236.52	13.8078	-196.616	-241.101	2012-11-11 11:49:39
2012-11-11 11:59:39	193.01	237.13	13.8148	-196.748	-241.723
2012-11-11 12:09:39	193.11	237.73	13.8217	-196.85	-242.334
2012-11-11 12:19:39	193.2	238.36	13.8287	-196.942	-242.977
2012-11-11 12:29:39	193.31	238.99	13.8356	-197.054	-243.619
2012-11-11 12:39:39	193.38	239.5	13.8426	-197.125	-244.139
2012-11-11 12:49:39	193.47	240.31	13.8495	-197.217	-244.964	2012-11-11 12:49:39
2012-11-11 12:59:39	193.59	240.94	13.8564	-197.339	-245.607
2012-11-11 13:09:39	193.69	241.48	13.8634	-197.441	-246.157
2012-11-11 13:19:39	193.8	242.48	13.8703	-197.554	-247.176
2012-11-11 13:29:39	193.87	243.02	13.8773	-197.625	-247.727
2012-11-11 13:39:39	194	243.78	13.8842	-197.757	-248.502
2012-11-11 13:49:39	192.57	240.77	13.8912	-196.3	-245.433	2012-11-11 13:49:39
2012-11-11 13:59:39	194.11	244.77	13.8981	-197.87	-249.511
2012-11-11 14:09:39	194.24	245.7	13.9051	-198.002	-250.459
2012-11-11 14:19:39	194.31	246.49	13.912	-198.073	-251.264
2012-11-11 14:29:39	194.44	247.4	13.9189	-198.206	-252.192
2012-11-11 14:39:39	194.53	248.16	13.9259	-198.298	-252.966
2012-11-11 14:49:39	194.65	249.2	13.9328	-198.42	-254.027	2012-11-11 14:49:39
2012-11-11 14:59:39	194.79	249.38	13.9398	-198.563	-254.21
2012-11-11 15:09:39	194.83	250.39	13.9467	-198.603	-255.24
2012-11-11 15:19:39	194.96	250.77	13.9537	-198.736	-255.627
2012-11-11 15:29:39	195.07	251.17	13.9606	-198.848	-256.035
2012-11-11 15:39:39	193.76	250.33	13.9676	-197.513	-255.178
2012-11-11 15:49:39	195.13	253.59	13.9745	-198.909	-258.502	2012-11-11 15:49:39
2012-11-11 15:59:39	195.27	254.64	13.9814	-199.052	-259.572
2012-11-11 16:09:39	195.43	255.9	13.9884	-199.215	-260.856
2012-11-11 16:19:39	195.56	257.05	13.9953	-199.348	-262.029
2012-11-11 16:29:39	195.7	257.83	14.0023	-199.49	-262.824
2012-11-11 16:39:39	195.67	258.7	14.0092	-199.46	-263.71
2012-11-11 16:49:39	195.91	260.07	14.0162	-199.704	-265.107	2012-11-11 16:49:39
2012-11-11 16:59:39	196.04	261.3	14.0231	-199.837	-266.361
2012-11-11 17:09:39	196.21	262.23	14.0301	-200.01	-267.309
2012-11-11 17:19:39	196.33	263.48	14.037	-200.133	-268.583
2012-11-11 17:29:39	196.45	263.91	14.0439	-200.255	-269.021
2012-11-11 17:39:39	196.56	265.18	14.0509	-200.367	-270.316
2012-11-11 17:49:39	196.68	266.05	14.0578	-200.489	-271.203	2012-11-11 17:49:39
2012-11-11 17:59:39	196.8	267.49	14.0648	-200.612	-272.671
2012-11-11 18:09:39	196.91	268.8	14.0717	-200.724	-274.006
2012-11-11 18:19:39	197.06	269.7	14.0787	-200.877	-274.924
2012-11-11 18:29:39	195.85	269.87	14.0856	-199.643	-275.097
2012-11-11 18:39:39	197.23	271.77	14.0926	-201.05	-277.034
2012-11-11 18:49:39	197.37	273.67	14.0995	-201.193	-278.97	2012-11-11 18:49:39
2012-11-11 18:59:39	197.51	275.07	14.1064	-201.335	-280.398
2012-11-11 19:09:39	197.65	276.49	14.1134	-201.478	-281.845
2012-11-11 19:19:39	197.8	278.13	14.1203	-201.631	-283.517
2012-11-11 19:29:39	197.93	279.4	14.1273	-201.764	-284.811
2012-11-11 19:39:39	198.08	281.15	14.1342	-201.916	-286.595
2012-11-11 19:49:39	198.2	282.52	14.1412	-202.039	-287.992	2012-11-11 19:49:39
2012-11-11 19:59:39	198.33	284.24	14.1481	-202.171	-289.745
2012-11-11 20:09:39	198.48	285.62	14.1551	-202.324	-291.152
2012-11-11 20:19:39	198.61	287.31	14.162	-202.457	-292.875
2012-11-11 20:29:39	198.73	288.8	14.1689	-202.579	-294.393
2012-11-11 20:39:39	198.86	290.54	14.1759	-202.712	-296.167
2012-11-11 20:49:39	198.98	292.24	14.1828	-202.834	-297.9	2012-11-11 20:49:39
2012-11-11 20:59:39	199.13	294.03	14.1898	-202.987	-299.725
2012-11-11 21:09:39	199.24	295.78	14.1967	-203.099	-301.509
2012-11-11 21:19:39	199.38	297.62	14.2037	-203.242	-303.384
2012-11-11 21:29:39	199.47	299.61	14.2106	-203.333	-305.413
2012-11-11 21:39:39	199.58	301.36	14.2176	-203.445	-307.197
2012-11-11 21:49:39	199.75	303.37	14.2245	-203.619	-309.246	2012-11-11 21:49:39
2012-11-11 21:59:39	199.86	305.17	14.2314	-203.731	-311.081
2012-11-11 22:09:39	199.99	307.39	14.2384	-203.863	-313.344
2012-11-11 22:19:39	200.07	309.63	14.2453	-203.945	-315.627
2012-11-11 22:29:39	200.22	311.38	14.2523	-204.098	-317.411
2012-11-11 22:39:39	200.38	313.69	14.2592	-204.261	-319.766
2012-11-11 22:49:39	200.45	316.15	14.2662	-204.332	-322.273	2012-11-11 22:49:39
2012-11-11 22:59:39	200.61	318.41	14.2731	-204.495	-324.577
2012-11-11 23:09:39	200.86	321.49	14.2801	-204.75	-327.717
2012-11-11 23:19:39	201	323.54	14.287	-204.893	-329.806
2012-11-11 23:29:39	201.15	326.8	14.2939	-205.046	-333.129
2012-11-11 23:39:39	201.27	328.87	14.3009	-205.168	-335.24
2012-11-11 23:49:39	201.4	331.52	14.3078	-205.301	-337.941	2012-11-11 23:49:39
2012-11-11 23:59:39	201.53	334.62	14.3148	-205.433	-341.101
2012-11-12 00:09:39	201.67	337.52	14.3217	-205.576	-344.057
2012-11-12 00:19:39	201.79	340.63	14.3287	-205.698	-347.227
2012-11-12 00:29:39	201.89	343.54	14.3356	-205.8	-350.194
2012-11-12 00:39:39	202.04	347.37	14.3426	-205.953	-354.098
2012-11-12 00:49:39	202.2	350.62	14.3495	-206.116	-357.411	2012-11-12 00:49:39
2012-11-12 00:59:39	202.3	354.26	14.3564	-206.218	-361.121
2012-11-12 01:09:39	202.48	358.26	14.3634	-206.402	-365.199
2012-11-12 01:19:39	202.62	362.53	14.3703	-206.544	-369.551
2012-11-12 01:29:39	202.76	367.29	14.3773	-206.687	-374.404
2012-11-12 01:39:39	202.86	370.89	14.3842	-206.789	-378.073
2012-11-12 01:49:39	202.99	374.49	14.3912	-206.922	-381.743	2012-11-12 01:49:39
2012-11-12 01:59:39	203.14	379.16	14.3981	-207.074	-386.504
2012-11-12 02:09:39	203.27	383.94	14.4051	-207.207	-391.376
2012-11-12 02:19:39	203.34	388.54	14.412	-207.278	-396.065
2012-11-12 02:29:39	203.56	394.18	14.4189	-207.503	-401.814
2012-11-12 02:39:39	203.7	399.88	14.4259	-207.645	-407.625
2012-11-12 02:49:39	203.83	405.54	14.4328	-207.778	-413.394	2012-11-12 02:49:39
2012-11-12 02:59:39	203.98	410.16	14.4398	-207.931	-418.104
2012-11-12 03:09:39	204.13	415.47	14.4467	-208.084	-423.517
2012-11-12 03:19:39	204.25	422.18	14.4537	-208.206	-430.357
2012-11-12 03:29:39	204.35	429.61	14.4606	-208.308	-437.931
2012-11-12 03:39:39	204.5	435.14	14.4676	-208.461	-443.568
2012-11-12 03:49:39	204.64	443.27	14.4745	-208.603	-451.855	2012-11-12 03:49:39
2012-11-12 03:59:39	204.77	449.92	14.4814	-208.736	-458.634
2012-11-12 04:09:39	204.91	456.81	14.4884	-208.879	-465.657
2012-11-12 04:19:39	205	464.7	14.4953	-208.97	-473.7
2012-11-12 04:29:39	205.1	473.35	14.5023	-209.072	-482.518
2012-11-12 04:39:39	205.25	482.11	14.5092	-209.225	-491.448
2012-11-12 04:49:39	205.38	486.27	14.5162	-209.358	-495.688	2012-11-12 04:49:39
2012-11-12 04:59:39	205.46	497.07	14.5231	-209.439	-506.697
2012-11-12 05:09:39	205.58	503.62	14.5301	-209.562	-513.374
2012-11-12 05:19:39	205.72	515.73	14.537	-209.704	-525.719
2012-11-12 05:29:39	205.82	528.4	14.5439	-209.806	-538.634
2012-11-12 05:39:39	205.96	540.51	14.5509	-209.949	-550.979
2012-11-12 05:49:39	206.07	551.98	14.5578	-210.061	-562.671	2012-11-12 05:49:39
2012-11-12 05:59:39	206.18	566.56	14.5648	-210.173	-577.533
2012-11-12 06:09:39	206.32	583.75	14.5717	-210.316	-595.056
2012-11-12 06:19:39	206.45	605.91	14.5787	-210.449	-617.645
2012-11-12 06:29:39	206.57	619.17	14.5856	-210.571	-631.162
2012-11-12 06:39:39	206.71	639.85	14.5926	-210.714	-652.243
2012-11-12 06:49:39	206.84	654.48	14.5995	-210.846	-667.156	2012-11-12 06:49:39
2012-11-12 06:59:39	206.97	686.52	14.6064	-210.979	-699.817
2012-11-12 07:09:39	207.1	711.63	14.6134	-211.111	-725.413
2012-11-12 07:19:39	207.23	724.95	14.6203	-211.244	-738.991
2012-11-12 07:29:39	207.37	758.21	14.6273	-211.386	-772.895
2012-11-12 07:39:39	207.5	789.02	14.6342	-211.519	-804.302
2012-11-12 07:49:39	207.59	827.85	14.6412	-211.611	-843.884	2012-11-12 07:49:39
2012-11-12 07:59:39	207.68	860.97	14.6481	-211.702	-877.645
2012-11-12 08:09:39	207.89	875.81	14.6551	-211.916	-892.773
2012-11-12 08:19:39	207.91	901.54	14.662	-211.937	-919.001
2012-11-12 08:29:39	208.07	914.35	14.6689	-212.1	-932.059
2012-11-12 08:39:39	208.21	727.27	14.6759	-212.243
2012-11-12 08:49:39	208.32	735.47	14.6828	-212.355		2012-11-12 08:49:39
2012-11-12 08:59:39	208.43	743.6	14.6898	-212.467
2012-11-12 09:09:39	208.51	748.82	14.6967	-212.548
2012-11-12 09:19:39	208.61	754.45	14.7037	-212.65
2012-11-12 09:29:39	208.73	762.47	14.7106	-212.773
2012-11-12 09:39:39	208.88	771.25	14.7176	-212.926
2012-11-12 09:49:39	209.01	777.59	14.7245	-213.058		2012-11-12 09:49:39
2012-11-12 09:59:39	207.96	784.55	14.7314	-211.988
2012-11-12 10:09:39	209.01	788.85	14.7384	-213.058
2012-11-12 10:19:39	209.17	793.86	14.7453	-213.221
2012-11-12 10:29:39	209.35	797.12	14.7523	-213.405
2012-11-12 10:39:39	209.45	799.69	14.7592	-213.507
2012-11-12 10:49:39	209.6	801.09	14.7662	-213.66		2012-11-12 10:49:39
2012-11-12 10:59:39	209.73	802.59	14.7731	-213.792
2012-11-12 11:09:39	209.84	805.26	14.7801	-213.904
2012-11-12 11:19:39	209.98	807.08	14.787	-214.047
2012-11-12 11:29:39	210.1	802.98	14.7939	-214.169
2012-11-12 11:39:39	210.23	805.99	14.8009	-214.302
2012-11-12 11:49:39	210.37	809.08	14.8078	-214.444		2012-11-12 11:49:39
2012-11-12 11:59:39	210.51	812.61	14.8148	-214.587
2012-11-12 12:09:39	210.65	815.87	14.8217	-214.73
2012-11-12 12:19:39	210.81	819.02	14.8287	-214.893
2012-11-12 12:29:39	210.99	821.51	14.8356	-215.076
2012-11-12 12:39:39	206.72	822.81	14.8426	-210.724
2012-11-12 12:49:39	209.84	825.46	14.8495	-213.904		2012-11-12 12:49:39
2012-11-12 12:59:39	211.11	828.89	14.8564	-215.199
2012-11-12 13:09:39	211.43	829.14	14.8634	-215.525
2012-11-12 13:19:39	211.68	832.45	14.8703	-215.78
2012-11-12 13:29:39	211.85	835.2	14.8773	-215.953
2012-11-12 13:39:39	212.07	838.04	14.8842	-216.177
2012-11-12 13:49:39	212.27	839.73	14.8912	-216.381		2012-11-12 13:49:39
2012-11-12 13:59:39	212.45	839.82	14.8981	-216.565
2012-11-12 14:09:39	212.62	841.99	14.9051	-216.738
2012-11-12 14:19:39	212.8	843.84	14.912	-216.922
2012-11-12 14:29:39	212.94	845.56	14.9189	-217.064
2012-11-12 14:39:39	213.15	846.68	14.9259	-217.278
2012-11-12 14:49:39	213.33	846.85	14.9328	-217.462		2012-11-12 14:49:39
2012-11-12 14:59:39	213.55	848.18	14.9398	-217.686
2012-11-12 15:09:39	213.66	849.37	14.9467	-217.798
2012-11-12 15:19:39	213.91	850.48	14.9537	-218.053
2012-11-12 15:29:39	214.02	851.13	14.9606	-218.165
2012-11-12 15:39:39	214.04	851.51	14.9676	-218.186
2012-11-12 15:49:39	214.32	851	14.9745	-218.471		2012-11-12 15:49:39
2012-11-12 15:59:39	214.51	851.91	14.9814	-218.665
2012-11-12 16:09:39	214.67	852.52	14.9884	-218.828
2012-11-12 16:19:39	214.88	853.47	14.9953	-219.042
2012-11-12 16:29:39	215.11	854.32	15.0023	-219.276
2012-11-12 16:39:39	215.29	854.15	15.0092	-219.46
2012-11-12 16:49:39	215.46	854.34	15.0162	-219.633		2012-11-12 16:49:39
2012-11-12 16:59:39	215.62	854.71	15.0231	-219.796
2012-11-12 17:09:39	215.78	855.05	15.0301	-219.959
2012-11-12 17:19:39	215.98	855.38	15.037	-220.163
2012-11-12 17:29:39	216.17	855.81	15.0439	-220.357
2012-11-12 17:39:39	216.32	855.04	15.0509	-220.51
2012-11-12 17:49:39	215.9	855.06	15.0578	-220.082		2012-11-12 17:49:39
2012-11-12 17:59:39	216.51	855.03	15.0648	-220.703
2012-11-12 18:09:39	216.76	854.66	15.0717	-220.958
2012-11-12 18:19:39	216.98	854.33	15.0787	-221.182
2012-11-12 18:29:39	217.15	853.62	15.0856	-221.356
2012-11-12 18:39:39	217.39	852.83	15.0926	-221.6
2012-11-12 18:49:39	217.58	850.83	15.0995	-221.794		2012-11-12 18:49:39
2012-11-12 18:59:39	217.8	849.72	15.1064	-222.018
2012-11-12 19:09:39	217.96	848.47	15.1134	-222.181
2012-11-12 19:19:39	218.16	847.05	15.1203	-222.385
2012-11-12 19:29:39	218.34	845.8	15.1273	-222.569
2012-11-12 19:39:39	218.55	844.59	15.1342	-222.783
2012-11-12 19:49:39	218.76	843.65	15.1412	-222.997		2012-11-12 19:49:39
2012-11-12 19:59:39	218.97	842.7	15.1481	-223.211
2012-11-12 20:09:39	219.17	841.93	15.1551	-223.415
2012-11-12 20:19:39	219.37	841.46	15.162	-223.619
2012-11-12 20:29:39	219.55	841.01	15.1689	-223.802
2012-11-12 20:39:39	219.71	840.69	15.1759	-223.965
2012-11-12 20:49:39	219.95	840.55	15.1828	-224.21		2012-11-12 20:49:39
2012-11-12 20:59:39	220.11	840.3	15.1898	-224.373
2012-11-12 21:09:39	220.33	840.17	15.1967	-224.597
2012-11-12 21:19:39	220.48	840.09	15.2037	-224.75
2012-11-12 21:29:39	220.64	840.14	15.2106	-224.913
2012-11-12 21:39:39	220.87	840.54	15.2176	-225.148
2012-11-12 21:49:39	221.03	840.33	15.2245	-225.311		2012-11-12 21:49:39
2012-11-12 21:59:39	221.18	839.97	15.2314	-225.464
2012-11-12 22:09:39	221.41	840.07	15.2384	-225.698
2012-11-12 22:19:39	221.6	840.38	15.2453	-225.892
2012-11-12 22:29:39	221.81	840.75	15.2523	-226.106
2012-11-12 22:39:39	222.02	841.12	15.2592	-226.32
2012-11-12 22:49:39	222.03	841.58	15.2662	-226.33		2012-11-12 22:49:39
2012-11-12 22:59:39	222.35	841.75	15.2731	-226.656
2012-11-12 23:09:39	222.34	842.27	15.2801	-226.646
2012-11-12 23:19:39	222.75	842.54	15.287	-227.064
2012-11-12 23:29:39	222.9	842.93	15.2939	-227.217
2012-11-12 23:39:39	223.1	843.47	15.3009	-227.421
2012-11-12 23:49:39	223.35	843.86	15.3078	-227.676		2012-11-12 23:49:39
2012-11-12 23:59:39	223.51	844.41	15.3148	-227.839
2012-11-13 00:09:39	223.73	844.83	15.3217	-228.063
2012-11-13 00:19:39	223.9	845.26	15.3287	-228.236
2012-11-13 00:29:39	224.17	845.31	15.3356	-228.512
2012-11-13 00:39:39	224.34	845.86	15.3426	-228.685
2012-11-13 00:49:39	224.56	846.48	15.3495	-228.909		2012-11-13 00:49:39
2012-11-13 00:59:39	224.75	847	15.3564	-229.103
2012-11-13 01:09:39	224.93	847.41	15.3634	-229.286
2012-11-13 01:19:39	225.21	847.95	15.3703	-229.572
2012-11-13 01:29:39	225.46	848.41	15.3773	-229.827
2012-11-13 01:39:39	225.66	849.02	15.3842	-230.031
2012-11-13 01:49:39	225.86	849.46	15.3912	-230.234		2012-11-13 01:49:39
2012-11-13 01:59:39	226.05	849.91	15.3981	-230.428
2012-11-13 02:09:39	226.27	850.41	15.4051	-230.652
2012-11-13 02:19:39	226.47	850.94	15.412	-230.856
2012-11-13 02:29:39	226.69	851.37	15.4189	-231.081
2012-11-13 02:39:39	226.91	851.62	15.4259	-231.305
2012-11-13 02:49:39	227.15	852.16	15.4328	-231.549		2012-11-13 02:49:39
2012-11-13 02:59:39	227.26	852.62	15.4398	-231.662
2012-11-13 03:09:39	227.51	853.29	15.4467	-231.916
2012-11-13 03:19:39	227.73	853.75	15.4537	-232.141
2012-11-13 03:29:39	227.95	854.24	15.4606	-232.365
2012-11-13 03:39:39	228.15	854.71	15.4676	-232.569
2012-11-13 03:49:39	228.41	855.07	15.4745	-232.834		2012-11-13 03:49:39
2012-11-13 03:59:39	228.5	855.56	15.4814	-232.926
2012-11-13 04:09:39	228.79	856.21	15.4884	-233.221
2012-11-13 04:19:39	229.01	856.64	15.4953	-233.445
2012-11-13 04:29:39	229.19	857.14	15.5023	-233.629
2012-11-13 04:39:39	229.46	857.51	15.5092	-233.904
2012-11-13 04:49:39	229.64	857.95	15.5162	-234.088		2012-11-13 04:49:39
2012-11-13 04:59:39	229.92	858.32	15.5231	-234.373
2012-11-13 05:09:39	230.15	858.77	15.5301	-234.608
2012-11-13 05:19:39	230.35	859.27	15.537	-234.811
2012-11-13 05:29:39	230.54	859.77	15.5439	-235.005
2012-11-13 05:39:39	230.78	860.38	15.5509	-235.25
2012-11-13 05:49:39	231.05	860.91	15.5578	-235.525		2012-11-13 05:49:39
2012-11-13 05:59:39	231.24	861.42	15.5648	-235.719
2012-11-13 06:09:39	231.49	861.64	15.5717	-235.973
2012-11-13 06:19:39	231.72	862.23	15.5787	-236.208
2012-11-13 06:29:39	231.95	862.76	15.5856	-236.442
2012-11-13 06:39:39	232.18	863.28	15.5926	-236.677
2012-11-13 06:49:39	232.35	863.8	15.5995	-236.85		2012-11-13 06:49:39
2012-11-13 06:59:39	232.61	864.4	15.6064	-237.115
2012-11-13 07:09:39	232.87	864.92	15.6134	-237.38
2012-11-13 07:19:39	233.1	865.25	15.6203	-237.615
2012-11-13 07:29:39	233.18	865.81	15.6273	-237.696
2012-11-13 07:39:39	233.5	866.4	15.6342	-238.022
2012-11-13 07:49:39	233.69	867.05	15.6412	-238.216		2012-11-13 07:49:39
2012-11-13 07:59:39	233.98	867.57	15.6481	-238.512
2012-11-13 08:09:39	234.19	867.87	15.6551	-238.726
2012-11-13 08:19:39	234.41	868.3	15.662	-238.95
2012-11-13 08:29:39	234.58	868.61	15.6689	-239.123
2012-11-13 08:39:39	234.7	868.88	15.6759	-239.246
2012-11-13 08:49:39	234.82	868.99	15.6828	-239.368		2012-11-13 08:49:39
2012-11-13 08:59:39	234.92	869.26	15.6898	-239.47
2012-11-13 09:09:39	235.01	869.52	15.6967	-239.562
2012-11-13 09:19:39	235.25	869.68	15.7037	-239.806
2012-11-13 09:29:39	235.39	869.93	15.7106	-239.949
2012-11-13 09:39:39	235.64	870.08	15.7176	-240.204
2012-11-13 09:49:39	235.79	870.41	15.7245	-240.357		2012-11-13 09:49:39
2012-11-13 09:59:39	236.11	870.73	15.7314	-240.683
2012-11-13 10:09:39	236.38	871.05	15.7384	-240.958
2012-11-13 10:19:39	236.58	871.29	15.7453	-241.162
2012-11-13 10:29:39	236.84	871.31	15.7523	-241.427
2012-11-13 10:39:39	236.96	871.38	15.7592	-241.549
2012-11-13 10:49:39	237.26	871.56	15.7662	-241.855		2012-11-13 10:49:39
2012-11-13 10:59:39	237.53	871.81	15.7731	-242.13
2012-11-13 11:09:39	237.76	871.8	15.7801	-242.365
2012-11-13 11:19:39	237.95	871.85	15.787	-242.559
2012-11-13 11:29:39	238.21	871.96	15.7939	-242.824
2012-11-13 11:39:39	238.43	871.78	15.8009	-243.048
2012-11-13 11:49:39	238.57	871.8	15.8078	-243.191		2012-11-13 11:49:39
2012-11-13 11:59:39	238.76	871.86	15.8148	-243.384
2012-11-13 12:09:39	239.12	872.02	15.8217	-243.751
2012-11-13 12:19:39	239.37	872.11	15.8287	-244.006
2012-11-13 12:29:39	239.5	871.94	15.8356	-244.139
2012-11-13 12:39:39	239.87	871.91	15.8426	-244.516
2012-11-13 12:49:39	240.2	871.75	15.8495	-244.852		2012-11-13 12:49:39
2012-11-13 12:59:39	240.44	871.71	15.8564	-245.097
2012-11-13 13:09:39	240.68	871.72	15.8634	-245.341
2012-11-13 13:19:39	240.9	871.71	15.8703	-245.566
2012-11-13 13:29:39	241.19	871.64	15.8773	-245.861
2012-11-13 13:39:39	241.44	871.65	15.8842	-246.116
2012-11-13 13:49:39	241.74	871.72	15.8912	-246.422		2012-11-13 13:49:39
2012-11-13 13:59:39	241.96	871.67	15.8981	-246.646
2012-11-13 14:09:39	242.26	871.62	15.9051	-246.952
2012-11-13 14:19:39	242.56	871.53	15.912	-247.258
2012-11-13 14:29:39	242.8	871.42	15.9189	-247.503
2012-11-13 14:39:39	243.07	871.43	15.9259	-247.778
2012-11-13 14:49:39	243.4	871.42	15.9328	-248.114		2012-11-13 14:49:39
2012-11-13 14:59:39	243.65	871.42	15.9398	-248.369
2012-11-13 15:09:39	243.92	871.4	15.9467	-248.644
2012-11-13 15:19:39	244.29	871.42	15.9537	-249.021
2012-11-13 15:29:39	244.36	871.29	15.9606	-249.093
2012-11-13 15:39:39	244.76	871.06	15.9676	-249.501
2012-11-13 15:49:39	245.04	871	15.9745	-249.786		2012-11-13 15:49:39
2012-11-13 15:59:39	245.44	871.04	15.9814	-250.194
2012-11-13 16:09:39	245.65	870.93	15.9884	-250.408
2012-11-13 16:19:39	245.97	870.96	15.9953	-250.734
2012-11-13 16:29:39	246.26	870.74	16.0023	-251.03
2012-11-13 16:39:39	246.52	870.65	16.0092	-251.295
2012-11-13 16:49:39	246.82	870.75	16.0162	-251.6		2012-11-13 16:49:39
2012-11-13 16:59:39	247.1	870.63	16.0231	-251.886
2012-11-13 17:09:39	247.48	870.45	16.0301	-252.273
2012-11-13 17:19:39	247.76	870.28	16.037	-252.559
2012-11-13 17:29:39	247.98	870.2	16.0439	-252.783
2012-11-13 17:39:39	248.42	870.22	16.0509	-253.231
2012-11-13 17:49:39	248.73	870.16	16.0578	-253.547		2012-11-13 17:49:39
2012-11-13 17:59:39	249.02	870.28	16.0648	-253.843
2012-11-13 18:09:39	249.3	870.28	16.0717	-254.128
2012-11-13 18:19:39	249.58	870.14	16.0787	-254.414
2012-11-13 18:29:39	249.94	870.06	16.0856	-254.781
2012-11-13 18:39:39	250.27	869.9	16.0926	-255.117
2012-11-13 18:49:39	250.61	869.8	16.0995	-255.464		2012-11-13 18:49:39
2012-11-13 18:59:39	250.92	869.85	16.1064	-255.78
2012-11-13 19:09:39	251.24	869.74	16.1134	-256.106
2012-11-13 19:19:39	251.56	869.53	16.1203	-256.432
2012-11-13 19:29:39	251.97	869.41	16.1273	-256.85
2012-11-13 19:39:39	252.19	869.45	16.1342	-257.074
2012-11-13 19:49:39	252.6	869.41	16.1412	-257.492		2012-11-13 19:49:39
2012-11-13 19:59:39	252.81	869.52	16.1481	-257.706
2012-11-13 20:09:39	253.26	869.4	16.1551	-258.165
2012-11-13 20:19:39	253.62	869.4	16.162	-258.532
2012-11-13 20:29:39	253.99	869.41	16.1689	-258.909
2012-11-13 20:39:39	254.34	869.23	16.1759	-259.266
2012-11-13 20:49:39	254.66	869.21	16.1828	-259.592		2012-11-13 20:49:39
2012-11-13 20:59:39	255.04	869.39	16.1898	-259.98
2012-11-13 21:09:39	255.42	869.27	16.1967	-260.367
2012-11-13 21:19:39	255.79	869.24	16.2037	-260.744
2012-11-13 21:29:39	256.18	869.23	16.2106	-261.142
2012-11-13 21:39:39	256.51	869.21	16.2176	-261.478
2012-11-13 21:49:39	256.96	869.25	16.2245	-261.937		2012-11-13 21:49:39
2012-11-13 21:59:39	257.27	869.13	16.2314	-262.253
2012-11-13 22:09:39	257.73	869.06	16.2384	-262.722
2012-11-13 22:19:39	258.12	868.92	16.2453	-263.119
2012-11-13 22:29:39	258.51	868.76	16.2523	-263.517
2012-11-13 22:39:39	258.93	868.66	16.2592	-263.945
2012-11-13 22:49:39	259.25	868.54	16.2662	-264.271		2012-11-13 22:49:39
2012-11-13 22:59:39	259.7	868.36	16.2731	-264.73
[truncated: 687 more rows]

## Sheet: Tensi
Zeit [d]	MP bot(2) [cm]	MP top(1) [cm]		air entry bot		AE time	AE [cm]	Type	Pos	Weight
0.0856134	0.0713558	-2.45668		nan	8800	#VALUE!	-8970.44	1	2	1
0.12728	-0.101937	-2.65036
0.168947	-0.265036	-2.82365		air entry top
0.210613	-0.438328	-2.99694		Time				Type	Pos	Weight
0.25228	-0.662589	-3.21101		2012-11-14	8800	16.315	-8970.44	1	1	1
0.293947	-0.856269	-3.42508
0.335613	-1.07034	-3.63914
0.37728	-1.22324	-3.79205
0.418947	-1.42712	-3.99592
0.460613	-1.64118	-4.1896
0.50228	-1.83486	-4.39348
0.543947	-2.06932	-4.62793
0.585613	-2.20183	-4.76045
0.62728	-2.32416	-4.88277
0.668947	-2.35474	-4.90316
0.710613	-2.49745	-5.05607
0.75228	-2.72171	-5.28033
0.793947	-2.83384	-5.39246
0.835613	-2.94597	-5.4842
0.87728	-3.01733	-5.57594
3.33561	-4.98471	-7.49235
3.37728	-5.06626	-7.5841
3.41895	-5.13761	-7.65545
3.46061	-5.21916	-7.72681
3.50228	-5.33129	-7.84913
3.54395	-5.42304	-7.94088
3.58561	-5.53517	-8.03262
3.62728	-5.57594	-8.09378
3.67589	-5.45362	-7.99185
3.71756	-5.56575	-8.07339
3.75922	-5.4842	-8.02243
3.80089	-5.69827	-8.21611
3.84256	-5.75943	-8.28746
3.88422	-5.90214	-8.41998
3.92589	-6.00408	-8.53211
3.96756	-6.14679	-8.68502
4.00922	-6.23853	-8.79715
4.05089	-6.29969	-8.88889
4.09256	-6.32008	-8.90928
4.13422	-6.44241	-9.0316
4.17589	-6.55454	-9.16412
4.21756	-6.69725	-9.31702
4.25922	-6.80938	-9.41896
4.30089	-6.92151	-9.55148
4.34256	-7.04383	-9.69419
4.38422	-7.13558	-9.78593
4.42589	-7.23751	-9.88787
4.46756	-7.38022	-10.0306
4.50922	-7.50255	-10.1835
4.55089	-7.61468	-10.2854
4.59256	-7.77778	-10.4281
4.63422	-7.9001	-10.5607
4.67589	-8.01223	-10.6728
4.71756	-8.16514	-10.8257
4.75922	-8.27727	-10.9582
4.80089	-8.44037	-11.1315
4.84256	-8.58308	-11.2844
4.88422	-8.7156	-11.4169
4.92589	-8.8685	-11.58
4.96756	-8.8685	-11.5698
5.00922	-9.11315	-11.8145
5.05089	-9.31702	-12.0082
5.09256	-9.54128	-12.2426
5.13422	-9.74516	-12.4567
5.17589	-9.88787	-12.6198
5.21756	-10.0815	-12.8135
5.25922	-10.2752	-13.0173
5.30089	-10.4893	-13.2212
5.34256	-10.6728	-13.4149
5.38422	-10.8665	-13.6086
5.42589	-11.0805	-13.8226
5.46756	-11.2742	-14.0265
5.50922	-11.4781	-14.2202
5.55089	-11.6922	-14.4444
5.59256	-11.896	-14.6483
5.63422	-12.1101	-14.8726
5.67589	-12.314	-15.0765
5.71756	-12.5382	-15.2905
5.75922	-12.7523	-15.5148
5.80089	-12.946	-15.7288
5.84256	-13.1498	-15.9327
5.88422	-13.3741	-16.1468
5.92589	-13.578	-16.371
5.96756	-13.7819	-16.5851
6.00922	-13.9144	-16.7074
6.05089	-14.1692	-16.9521
6.09256	-14.4037	-17.1967
6.13422	-14.6585	-17.4516
6.17589	-14.9032	-17.6962
6.21756	-15.1784	-17.9817
6.25922	-15.4332	-18.2365
6.30089	-15.6983	-18.5015
6.34256	-15.9429	-18.7462
6.38422	-16.208	-19.001
6.42589	-16.4628	-19.2661
6.46756	-16.7176	-19.5209
6.50922	-16.9827	-19.8063
6.55089	-17.2681	-20.0815
6.59256	-17.5535	-20.3772
6.63422	-17.8186	-20.6524
6.67589	-18.1244	-20.948
6.71756	-18.4098	-21.2334
6.75922	-18.7156	-21.5494
6.80089	-19.0214	-21.8451
6.84256	-19.2966	-22.1305
6.88422	-19.6024	-22.4261
6.92589	-19.8981	-22.7115
6.96756	-20.2039	-23.0377
7.00922	-20.3568	-23.2008
7.05089	-20.6932	-23.5474
7.09256	-21.0296	-23.8736
7.13422	-21.366	-24.2304
7.17589	-21.7329	-24.577
7.21756	-22.0693	-24.9134
7.25922	-22.4159	-25.2701
7.30089	-22.7727	-25.6269
7.34256	-23.1193	-25.9633
7.38422	-23.476	-26.3303
7.42589	-23.8532	-26.6972
7.46756	-24.2508	-27.1152
7.50922	-24.6483	-27.4822
7.55089	-25.0765	-27.9409
7.59256	-25.4944	-28.3486
7.63422	-25.8716	-28.7564
7.67589	-26.3099	-29.1743
7.71756	-26.6667	-29.5311
7.75922	-27.054	-29.9185
7.80089	-27.421	-30.316
7.84256	-27.8695	-30.7441
7.88422	-28.3486	-31.2334
7.92589	-28.8583	-31.7635
7.96756	-29.3782	-32.2528
8.00922	-29.735	-32.5994
8.05089	-30.316	-33.2008
8.09256	-30.9174	-33.8022
8.13422	-31.5494	-34.4444
8.17589	-32.0999	-34.9541
8.21756	-32.6606	-35.525
8.25922	-33.262	-36.1264
8.30089	-33.8328	-36.6667
8.34256	-34.4444	-37.3191
8.38422	-35.0968	-37.9715
8.42589	-35.7187	-38.5729
8.46756	-36.4118	-39.2966
8.50922	-37.0948	-39.9796
8.55089	-37.7676	-40.6728
8.59256	-38.4811	-41.3761
8.63422	-39.2253	-42.1101
8.67589	-39.9796	-42.8848
8.71756	-40.7339	-43.6391
8.75922	-41.4883	-44.4037
8.80784	-42.3955	-45.2905
8.8495	-42.579	-45.5454
8.89117	-43.843	-46.7584
8.93284	-44.7095	-47.6453
8.9745	-45.5759	-48.5321
9.01617	-46.5647	-49.5005
9.05784	-47.3496	-50.3262
9.0995	-48.6137	-51.5902
9.14117	-49.8777	-52.8542
9.18284	-51.1927	-54.1896
9.2245	-52.4873	-55.4638
9.26617	-53.8532	-56.8603
9.30784	-55.2497	-58.2773
9.3495	-56.5851	-59.5821
9.39117	-57.9001	-60.9072
9.43284	-59.2457	-62.263
9.4745	-60.6626	-63.7309
9.51617	-62.0795	-65.1478
9.55784	-63.5882	-66.6565
9.5995	-65.0866	-68.1753
9.64117	-66.6055	-69.7044
9.68284	-67.9307	-71.0092
9.7245	-69.2049	-72.2426
9.76617	-70.5403	-73.7411
9.80784	-72.0387	-75.209
9.8495	-73.6493	-76.8807
9.89117	-75.4332	-78.6748
9.93284	-77.2171	-80.4995
9.9745	-79.0724	-82.3751
10.0162	-80.948	-84.2304
10.0578	-82.4057	-85.739
10.0995	-84.5056	-87.7982
10.1412	-86.5545	-89.9286
10.1828	-88.5831	-91.9572
10.2245	-90.6728	-94.1182
10.2662	-92.7625	-96.2385
10.3078	-94.8114	-98.3384
10.3495	-96.8705	-100.591
10.3912	-99.2049	-102.885
10.4328	-101.519	-105.229
10.4745	-103.802	-107.625
10.5162	-106.096	-109.929
10.5578	-108.461	-112.365
10.5995	-110.907	-114.873
10.6412	-113.333	-117.401
10.6828	-115.657	-119.847
10.7245	-118.124	-122.396
10.7662	-120.428	-124.689
10.8078	-122.895	-127.258
10.8495	-125.28	-129.827
10.8912	-127.523	-132.11
10.9328	-129.225	-133.925
10.9745	-131.845	-136.463
11.0162	-134.108	-138.858
11.0578	-136.33	-141.06
11.0995	-138.44	-143.323
11.1412	-140.734	-145.923
11.1828	-143.048	-148.318
11.2245	-145.219	-150.642
11.2662	-147.339	-152.803
11.3078	-149.307	-154.893
11.3495	-151.172	-156.84
11.3912	-152.966	-158.675
11.4328	-154.72	-160.571
11.4745	-156.34	-162.283
11.5162	-157.89	-163.925
11.5578	-159.368	-165.474
11.5995	-160.734	-166.972
11.6412	-162.018	-168.257
11.6828	-162.977	-169.011
11.7245	-163.996	-170.377
11.7662	-165.056	-171.448
11.8078	-166.116	-172.701
11.8495	-167.136	-173.904
11.8912	-168.135	-175.127
11.9328	-168.756	-175.729
11.9745	-169.776	-176.972
12.0162	-170.744	-178.094
12.0578	-171.611	-179.093
12.0995	-172.457	-180.173
12.1412	-173.262	-181.142
12.1828	-174.057	-182.12
12.2245	-174.842	-183.099
12.2662	-175.545	-183.976
12.3078	-176.269	-184.944
12.3495	-176.972	-185.831
12.3912	-177.635	-186.758
12.4328	-178.277	-187.645
12.4745	-178.899	-188.522
12.5162	-179.501	-189.409
12.5578	-180.082	-190.265
12.5995	-180.612	-191.162
12.6412	-181.203	-192.08
12.6828	-181.784	-192.813
12.7245	-182.222	-193.894
12.7662	-182.732	-194.638
12.8078	-183.262	-195.78
12.8495	-183.812	-196.85
12.8912	-184.373	-197.92
12.9328	-184.913	-199.001
12.9745	-185.005	-199.195
13.0162	-185.759	-201.131
13.0578	-186.412	-202.589
13.0995	-187.034	-203.925
13.1412	-187.655	-205.28
13.1828	-188.226	-206.799
13.2245	-188.818	-208.328
13.2662	-189.388	-209.969
13.3078	-189.98	-211.723
13.3495	-190.499	-213.405
13.3912	-191.05	-215.209
13.4328	-191.6	-217.197
13.4745	-192.13	-219.123
13.5162	-192.661	-221.203
13.5578	-193.242	-223.537
13.5995	-193.802	-225.984
13.6412	-194.363	-228.512
13.6828	-194.913	-231.131
13.7245	-195.443	-234.23
13.7662	-196.024	-237.594
13.8078	-196.616	-241.101
13.8495	-197.217	-244.964
13.8912	-196.3	-245.433
13.9328	-198.42	-254.027
13.9745	-198.909	-258.502
14.0162	-199.704	-265.107
14.0578	-200.489	-271.203
14.0995	-201.193	-278.97
14.1412	-202.039	-287.992
14.1828	-202.834	-297.9
14.2245	-203.619	-309.246
14.2662	-204.332	-322.273
14.3078	-205.301	-337.941
14.3495	-206.116	-357.411
14.3912	-206.922	-381.743
14.4328	-207.778	-413.394
14.4745	-208.603	-451.855
14.5162	-209.358	-495.688
14.5578	-210.061	-562.671
14.5995	-210.846	-667.156
14.6412	-211.611	-843.884
14.6828	-212.355
14.7245	-213.058
14.7662	-213.66
14.8078	-214.444
14.8495	-213.904
14.8912	-216.381
14.9328	-217.462
14.9745	-218.471
15.0162	-219.633
15.0578	-220.082
15.0995	-221.794
15.1412	-222.997
15.1828	-224.21
15.2245	-225.311
15.2662	-226.33
15.3078	-227.676
15.3495	-228.909
15.3912	-230.234
15.4328	-231.549
15.4745	-232.834
15.5162	-234.088
15.5578	-235.525
15.5995	-236.85
15.6412	-238.216
15.6828	-239.368
15.7245	-240.357
15.7662	-241.855
15.8078	-243.191
15.8495	-244.852
15.8912	-246.422
15.9328	-248.114
15.9745	-249.786
16.0162	-251.6
16.0578	-253.547
16.0995	-255.464
16.1412	-257.492
16.1828	-259.592
16.2245	-261.937
16.2662	-264.271
16.3078	-266.799
16.3495	-269.083
16.3912	-271.325
16.4328	-273.874
16.4745	-276.045
16.5162	-278.838
16.5578	-281.896
16.5995	-284.862
16.6412	-287.686
16.6828	-290.082
16.7245	-289.796
16.7662	-295.454
16.8078	-299.399
16.8495	-303.078
16.8912	-306.473
16.9328	-309.766
16.9745	-313.527
17.0162	-317.982
17.0578	-322.385
17.0995	-327.125
17.1412	-332.355
17.1828	-337.971
17.2245	-343.945
17.2662	-350.143
17.3078	-356.402
17.3495	-363.333
17.3912	-370.663
17.4328	-378.552
17.4745	-386.993
17.5162	-396.045
17.5578	-405.484
17.5995	-415.78
17.6412	-426.952
17.6828	-434.944
17.7245	-442.508
17.7662	-453.782
17.8078	-469.949
17.8495	-483.282
17.8912	-498.603
17.9328	-510.866
17.9745	-526.84
18.0162	-563.068
18.0578	-599.98
18.0995	-634.271
18.1412	-676.126
18.1828	-718.716
18.2245	-763.751
18.2662	-814.852
18.3078	-865.923
18.3495	-923.925
18.3912	-988.022
18.412	-1022.91
18.4328	-1058.92
18.4467	-1084.41
18.4745	-1137.29
18.4953	-1178.45
18.5162	-1216.96
18.537	-1258.3
18.5578	-1304.18
18.5787	-1351.27
18.5995	-1398.33
18.6064	-1415.6

## Sheet: HYDRUS
Data für die Zielfunktion: 2 x Tensionen, 1 x Endwassergehalt					Verdunstungsrate
Time	Obs	Type	Pos	Weight	Zeitintervall		Evarate [cm/d]			Type	1-Tension	2-Wassergehalt
0.0856134	0.0713558	1	2	1	0.639861	0	0.387098			Pos	1-top	2-bot	(von oben nach unten)
0.12728	-0.101937	1	2	1	1.05881	0	0.383114			30	Time-Variable boundary conditions+
0.168947	-0.265036	1	2	1	1.64543	0	0.336638			18.607	Final Time	Time Information
0.210613	-0.438328	1	2	1	2.17316	0	0.293392			716	Number of Data Points in Objective Function
0.25228	-0.662589	1	2	1	2.67944	0	0.30499		Interpolated Values	-3.34976	BC-top	[cm]
0.293947	-0.856269	1	2	1	2.90606	0	0.307774			-2.09976	MP_top_ini	[cm]	1
0.335613	-1.07034	1	2	1	3.02622	0	0.298995			0.394913	MP_bot_ini	[cm]	2
0.37728	-1.22324	1	2	1	3.64856	0	0.307523			1.64491	BC-bot	[cm]
0.418947	-1.42712	1	2	1	4.02706	0	0.345796
0.460613	-1.64118	1	2	1	4.76814	0	0.341032
0.50228	-1.83486	1	2	1	5.15531	0	0.35595
0.543947	-2.06932	1	2	1	5.74788	0	0.347795		Real Values	-1.25	BC-top	[cm]
0.585613	-2.20183	1	2	1	6.08309	0	0.321511				MP_top_ini	[cm]
0.62728	-2.32416	1	2	1	6.78597	0	0.333561				MP_bot_ini	[cm]
0.668947	-2.35474	1	2	1	7.12581	0	0.32084			1.25	BC-bot	[cm]
0.710613	-2.49745	1	2	1	7.77817	0	0.300138
0.75228	-2.72171	1	2	1	8.1523	0	0.297608
0.793947	-2.83384	1	2	1	8.79434	0	0.273224
0.835613	-2.94597	1	2	1	9.1859	0	0.285969
0.87728	-3.01733	1	2	1	9.73438	0	0.286893
3.33561	-4.98471	1	2	1	10.1012	0	0.270923
3.37728	-5.06626	1	2	1	10.7337	0	0.278657
3.41895	-5.13761	1	2	1	11.0869	0	0.255794
3.46061	-5.21916	1	2	1	11.6689	0	0.239293
3.50228	-5.33129	1	2	1	13.2374	0	0.189392
3.54395	-5.42304	1	2	1	13.8884	0	0.141676
3.58561	-5.53517	1	2	1	14.0842	0	0.138371
3.62728	-5.57594	1	2	1	14.7259	0	0.132264
3.67589	-5.45362	1	2	1	17.7676	0	0.101461
3.71756	-5.56575	1	2	1	18.607	0	0.101461
3.75922	-5.4842	1	2	1
3.80089	-5.69827	1	2	1
3.84256	-5.75943	1	2	1
3.88422	-5.90214	1	2	1
3.92589	-6.00408	1	2	1
3.96756	-6.14679	1	2	1
4.00922	-6.23853	1	2	1
4.05089	-6.29969	1	2	1
4.09256	-6.32008	1	2	1
4.13422	-6.44241	1	2	1
4.17589	-6.55454	1	2	1
4.21756	-6.69725	1	2	1
4.25922	-6.80938	1	2	1
4.30089	-6.92151	1	2	1
4.34256	-7.04383	1	2	1
4.38422	-7.13558	1	2	1
4.42589	-7.23751	1	2	1
4.46756	-7.38022	1	2	1
4.50922	-7.50255	1	2	1
4.55089	-7.61468	1	2	1
4.59256	-7.77778	1	2	1
4.63422	-7.9001	1	2	1
4.67589	-8.01223	1	2	1
4.71756	-8.16514	1	2	1
4.75922	-8.27727	1	2	1
4.80089	-8.44037	1	2	1
4.84256	-8.58308	1	2	1
4.88422	-8.7156	1	2	1
4.92589	-8.8685	1	2	1
4.96756	-8.8685	1	2	1
5.00922	-9.11315	1	2	1
5.05089	-9.31702	1	2	1
5.09256	-9.54128	1	2	1
5.13422	-9.74516	1	2	1
5.17589	-9.88787	1	2	1
5.21756	-10.0815	1	2	1
5.25922	-10.2752	1	2	1
5.30089	-10.4893	1	2	1
5.34256	-10.6728	1	2	1
5.38422	-10.8665	1	2	1
5.42589	-11.0805	1	2	1
5.46756	-11.2742	1	2	1
5.50922	-11.4781	1	2	1
5.55089	-11.6922	1	2	1
5.59256	-11.896	1	2	1
5.63422	-12.1101	1	2	1
5.67589	-12.314	1	2	1
5.71756	-12.5382	1	2	1
5.75922	-12.7523	1	2	1
5.80089	-12.946	1	2	1
5.84256	-13.1498	1	2	1
5.88422	-13.3741	1	2	1
5.92589	-13.578	1	2	1
5.96756	-13.7819	1	2	1
6.00922	-13.9144	1	2	1
6.05089	-14.1692	1	2	1
6.09256	-14.4037	1	2	1
6.13422	-14.6585	1	2	1
6.17589	-14.9032	1	2	1
6.21756	-15.1784	1	2	1
6.25922	-15.4332	1	2	1
6.30089	-15.6983	1	2	1
6.34256	-15.9429	1	2	1
6.38422	-16.208	1	2	1
6.42589	-16.4628	1	2	1
6.46756	-16.7176	1	2	1
6.50922	-16.9827	1	2	1
6.55089	-17.2681	1	2	1
6.59256	-17.5535	1	2	1
6.63422	-17.8186	1	2	1
6.67589	-18.1244	1	2	1
6.71756	-18.4098	1	2	1
6.75922	-18.7156	1	2	1
6.80089	-19.0214	1	2	1
6.84256	-19.2966	1	2	1
6.88422	-19.6024	1	2	1
6.92589	-19.8981	1	2	1
6.96756	-20.2039	1	2	1
7.00922	-20.3568	1	2	1
7.05089	-20.6932	1	2	1
7.09256	-21.0296	1	2	1
7.13422	-21.366	1	2	1
7.17589	-21.7329	1	2	1
7.21756	-22.0693	1	2	1
7.25922	-22.4159	1	2	1
7.30089	-22.7727	1	2	1
7.34256	-23.1193	1	2	1
7.38422	-23.476	1	2	1
7.42589	-23.8532	1	2	1
7.46756	-24.2508	1	2	1
7.50922	-24.6483	1	2	1
7.55089	-25.0765	1	2	1
7.59256	-25.4944	1	2	1
7.63422	-25.8716	1	2	1
7.67589	-26.3099	1	2	1
7.71756	-26.6667	1	2	1
7.75922	-27.054	1	2	1
7.80089	-27.421	1	2	1
7.84256	-27.8695	1	2	1
7.88422	-28.3486	1	2	1
7.92589	-28.8583	1	2	1
7.96756	-29.3782	1	2	1
8.00922	-29.735	1	2	1
8.05089	-30.316	1	2	1
8.09256	-30.9174	1	2	1
8.13422	-31.5494	1	2	1
8.17589	-32.0999	1	2	1
8.21756	-32.6606	1	2	1
8.25922	-33.262	1	2	1
8.30089	-33.8328	1	2	1
8.34256	-34.4444	1	2	1
8.38422	-35.0968	1	2	1
8.42589	-35.7187	1	2	1
8.46756	-36.4118	1	2	1
8.50922	-37.0948	1	2	1
8.55089	-37.7676	1	2	1
8.59256	-38.4811	1	2	1
8.63422	-39.2253	1	2	1
8.67589	-39.9796	1	2	1
8.71756	-40.7339	1	2	1
8.75922	-41.4883	1	2	1
8.80784	-42.3955	1	2	1
8.8495	-42.579	1	2	1
8.89117	-43.843	1	2	1
8.93284	-44.7095	1	2	1
8.9745	-45.5759	1	2	1
9.01617	-46.5647	1	2	1
9.05784	-47.3496	1	2	1
9.0995	-48.6137	1	2	1
9.14117	-49.8777	1	2	1
9.18284	-51.1927	1	2	1
9.2245	-52.4873	1	2	1
9.26617	-53.8532	1	2	1
9.30784	-55.2497	1	2	1
9.3495	-56.5851	1	2	1
9.39117	-57.9001	1	2	1
9.43284	-59.2457	1	2	1
9.4745	-60.6626	1	2	1
9.51617	-62.0795	1	2	1
9.55784	-63.5882	1	2	1
9.5995	-65.0866	1	2	1
9.64117	-66.6055	1	2	1
9.68284	-67.9307	1	2	1
9.7245	-69.2049	1	2	1
9.76617	-70.5403	1	2	1
9.80784	-72.0387	1	2	1
9.8495	-73.6493	1	2	1
9.89117	-75.4332	1	2	1
9.93284	-77.2171	1	2	1
9.9745	-79.0724	1	2	1
10.0162	-80.948	1	2	1
10.0578	-82.4057	1	2	1
10.0995	-84.5056	1	2	1
10.1412	-86.5545	1	2	1
10.1828	-88.5831	1	2	1
10.2245	-90.6728	1	2	1
10.2662	-92.7625	1	2	1
10.3078	-94.8114	1	2	1
10.3495	-96.8705	1	2	1
10.3912	-99.2049	1	2	1
10.4328	-101.519	1	2	1
10.4745	-103.802	1	2	1
10.5162	-106.096	1	2	1
10.5578	-108.461	1	2	1
10.5995	-110.907	1	2	1
10.6412	-113.333	1	2	1
10.6828	-115.657	1	2	1
10.7245	-118.124	1	2	1
10.7662	-120.428	1	2	1
10.8078	-122.895	1	2	1
10.8495	-125.28	1	2	1
10.8912	-127.523	1	2	1
10.9328	-129.225	1	2	1
10.9745	-131.845	1	2	1
11.0162	-134.108	1	2	1
11.0578	-136.33	1	2	1
11.0995	-138.44	1	2	1
11.1412	-140.734	1	2	1
11.1828	-143.048	1	2	1
11.2245	-145.219	1	2	1
11.2662	-147.339	1	2	1
11.3078	-149.307	1	2	1
11.3495	-151.172	1	2	1
11.3912	-152.966	1	2	1
11.4328	-154.72	1	2	1
11.4745	-156.34	1	2	1
11.5162	-157.89	1	2	1
11.5578	-159.368	1	2	1
11.5995	-160.734	1	2	1
11.6412	-162.018	1	2	1
11.6828	-162.977	1	2	1
11.7245	-163.996	1	2	1
11.7662	-165.056	1	2	1
11.8078	-166.116	1	2	1
11.8495	-167.136	1	2	1
11.8912	-168.135	1	2	1
11.9328	-168.756	1	2	1
11.9745	-169.776	1	2	1
12.0162	-170.744	1	2	1
12.0578	-171.611	1	2	1
12.0995	-172.457	1	2	1
12.1412	-173.262	1	2	1
12.1828	-174.057	1	2	1
12.2245	-174.842	1	2	1
12.2662	-175.545	1	2	1
12.3078	-176.269	1	2	1
12.3495	-176.972	1	2	1
12.3912	-177.635	1	2	1
12.4328	-178.277	1	2	1
12.4745	-178.899	1	2	1
12.5162	-179.501	1	2	1
12.5578	-180.082	1	2	1
12.5995	-180.612	1	2	1
12.6412	-181.203	1	2	1
12.6828	-181.784	1	2	1
12.7245	-182.222	1	2	1
12.7662	-182.732	1	2	1
12.8078	-183.262	1	2	1
12.8495	-183.812	1	2	1
12.8912	-184.373	1	2	1
12.9328	-184.913	1	2	1
12.9745	-185.005	1	2	1
13.0162	-185.759	1	2	1
13.0578	-186.412	1	2	1
13.0995	-187.034	1	2	1
13.1412	-187.655	1	2	1
13.1828	-188.226	1	2	1
13.2245	-188.818	1	2	1
13.2662	-189.388	1	2	1
13.3078	-189.98	1	2	1
13.3495	-190.499	1	2	1
13.3912	-191.05	1	2	1
13.4328	-191.6	1	2	1
13.4745	-192.13	1	2	1
13.5162	-192.661	1	2	1
13.5578	-193.242	1	2	1
13.5995	-193.802	1	2	1
13.6412	-194.363	1	2	1
13.6828	-194.913	1	2	1
13.7245	-195.443	1	2	1
13.7662	-196.024	1	2	1
13.8078	-196.616	1	2	1
13.8495	-197.217	1	2	1
13.8912	-196.3	1	2	1
13.9328	-198.42	1	2	1
13.9745	-198.909	1	2	1
14.0162	-199.704	1	2	1
14.0578	-200.489	1	2	1
14.0995	-201.193	1	2	1
14.1412	-202.039	1	2	1
14.1828	-202.834	1	2	1
14.2245	-203.619	1	2	1
14.2662	-204.332	1	2	1
14.3078	-205.301	1	2	1
14.3495	-206.116	1	2	1
14.3912	-206.922	1	2	1
14.4328	-207.778	1	2	1
14.4745	-208.603	1	2	1
14.5162	-209.358	1	2	1
14.5578	-210.061	1	2	1
14.5995	-210.846	1	2	1
14.6412	-211.611	1	2	1
14.6828	-212.355	1	2	1
14.7245	-213.058	1	2	1
14.7662	-213.66	1	2	1
14.8078	-214.444	1	2	1
14.8495	-213.904	1	2	1
14.8912	-216.381	1	2	1
14.9328	-217.462	1	2	1
14.9745	-218.471	1	2	1
15.0162	-219.633	1	2	1
15.0578	-220.082	1	2	1
15.0995	-221.794	1	2	1
15.1412	-222.997	1	2	1
15.1828	-224.21	1	2	1
15.2245	-225.311	1	2	1
15.2662	-226.33	1	2	1
15.3078	-227.676	1	2	1
15.3495	-228.909	1	2	1
15.3912	-230.234	1	2	1
15.4328	-231.549	1	2	1
15.4745	-232.834	1	2	1
15.5162	-234.088	1	2	1
15.5578	-235.525	1	2	1
15.5995	-236.85	1	2	1
15.6412	-238.216	1	2	1
15.6828	-239.368	1	2	1
15.7245	-240.357	1	2	1
15.7662	-241.855	1	2	1
15.8078	-243.191	1	2	1
15.8495	-244.852	1	2	1
15.8912	-246.422	1	2	1
15.9328	-248.114	1	2	1
15.9745	-249.786	1	2	1
16.0162	-251.6	1	2	1
16.0578	-253.547	1	2	1
16.0995	-255.464	1	2	1
16.1412	-257.492	1	2	1
16.1828	-259.592	1	2	1
16.2245	-261.937	1	2	1
16.2662	-264.271	1	2	1
16.3078	-266.799	1	2	1
16.3495	-269.083	1	2	1
16.3912	-271.325	1	2	1
16.4328	-273.874	1	2	1
16.4745	-276.045	1	2	1
16.5162	-278.838	1	2	1
16.5578	-281.896	1	2	1
16.5995	-284.862	1	2	1
16.6412	-287.686	1	2	1
16.6828	-290.082	1	2	1
16.7245	-289.796	1	2	1
16.7662	-295.454	1	2	1
16.8078	-299.399	1	2	1
16.8495	-303.078	1	2	1
16.8912	-306.473	1	2	1
16.9328	-309.766	1	2	1
16.9745	-313.527	1	2	1
17.0162	-317.982	1	2	1
17.0578	-322.385	1	2	1
17.0995	-327.125	1	2	1
17.1412	-332.355	1	2	1
17.1828	-337.971	1	2	1
17.2245	-343.945	1	2	1
17.2662	-350.143	1	2	1
17.3078	-356.402	1	2	1
17.3495	-363.333	1	2	1
17.3912	-370.663	1	2	1
17.4328	-378.552	1	2	1
17.4745	-386.993	1	2	1
17.5162	-396.045	1	2	1
17.5578	-405.484	1	2	1
17.5995	-415.78	1	2	1
17.6412	-426.952	1	2	1
17.6828	-434.944	1	2	1
17.7245	-442.508	1	2	1
17.7662	-453.782	1	2	1
17.8078	-469.949	1	2	1
17.8495	-483.282	1	2	1
17.8912	-498.603	1	2	1
17.9328	-510.866	1	2	1
17.9745	-526.84	1	2	1
18.0162	-563.068	1	2	1
18.0578	-599.98	1	2	1
18.0995	-634.271	1	2	1
18.1412	-676.126	1	2	1
18.1828	-718.716	1	2	1
18.2245	-763.751	1	2	1
18.2662	-814.852	1	2	1
18.3078	-865.923	1	2	1
18.3495	-923.925	1	2	1
18.3912	-988.022	1	2	1
18.412	-1022.91	1	2	1
18.4328	-1058.92	1	2	1
18.4467	-1084.41	1	2	1
18.4745	-1137.29	1	2	1
18.4953	-1178.45	1	2	1
18.5162	-1216.96	1	2	1
18.537	-1258.3	1	2	1
18.5578	-1304.18	1	2	1
18.5787	-1351.27	1	2	1
18.5995	-1398.33	1	2	1
18.6064	-1415.6	1	2	1
0.0856134	-2.45668	1	1	1
0.12728	-2.65036	1	1	1
0.168947	-2.82365	1	1	1
0.210613	-2.99694	1	1	1
0.25228	-3.21101	1	1	1
0.293947	-3.42508	1	1	1
0.335613	-3.63914	1	1	1
0.37728	-3.79205	1	1	1
0.418947	-3.99592	1	1	1
0.460613	-4.1896	1	1	1
0.50228	-4.39348	1	1	1
0.543947	-4.62793	1	1	1
0.585613	-4.76045	1	1	1
0.62728	-4.88277	1	1	1
0.668947	-4.90316	1	1	1
0.710613	-5.05607	1	1	1
0.75228	-5.28033	1	1	1
0.793947	-5.39246	1	1	1
0.835613	-5.4842	1	1	1
0.87728	-5.57594	1	1	1
3.33561	-7.49235	1	1	1
3.37728	-7.5841	1	1	1
3.41895	-7.65545	1	1	1
3.46061	-7.72681	1	1	1
3.50228	-7.84913	1	1	1
3.54395	-7.94088	1	1	1
3.58561	-8.03262	1	1	1
3.62728	-8.09378	1	1	1
3.67589	-7.99185	1	1	1
3.71756	-8.07339	1	1	1
3.75922	-8.02243	1	1	1
3.80089	-8.21611	1	1	1
3.84256	-8.28746	1	1	1
3.88422	-8.41998	1	1	1
3.92589	-8.53211	1	1	1
3.96756	-8.68502	1	1	1
4.00922	-8.79715	1	1	1
4.05089	-8.88889	1	1	1
4.09256	-8.90928	1	1	1
4.13422	-9.0316	1	1	1
4.17589	-9.16412	1	1	1
4.21756	-9.31702	1	1	1
4.25922	-9.41896	1	1	1
4.30089	-9.55148	1	1	1
4.34256	-9.69419	1	1	1
4.38422	-9.78593	1	1	1
4.42589	-9.88787	1	1	1
4.46756	-10.0306	1	1	1
4.50922	-10.1835	1	1	1
4.55089	-10.2854	1	1	1
4.59256	-10.4281	1	1	1
4.63422	-10.5607	1	1	1
4.67589	-10.6728	1	1	1
4.71756	-10.8257	1	1	1
4.75922	-10.9582	1	1	1
4.80089	-11.1315	1	1	1
4.84256	-11.2844	1	1	1
4.88422	-11.4169	1	1	1
4.92589	-11.58	1	1	1
4.96756	-11.5698	1	1	1
5.00922	-11.8145	1	1	1
5.05089	-12.0082	1	1	1
5.09256	-12.2426	1	1	1
5.13422	-12.4567	1	1	1
5.17589	-12.6198	1	1	1
5.21756	-12.8135	1	1	1
5.25922	-13.0173	1	1	1
5.30089	-13.2212	1	1	1
5.34256	-13.4149	1	1	1
5.38422	-13.6086	1	1	1
5.42589	-13.8226	1	1	1
5.46756	-14.0265	1	1	1
5.50922	-14.2202	1	1	1
5.55089	-14.4444	1	1	1
5.59256	-14.6483	1	1	1
5.63422	-14.8726	1	1	1
5.67589	-15.0765	1	1	1
5.71756	-15.2905	1	1	1
5.75922	-15.5148	1	1	1
5.80089	-15.7288	1	1	1
5.84256	-15.9327	1	1	1
5.88422	-16.1468	1	1	1
5.92589	-16.371	1	1	1
5.96756	-16.5851	1	1	1
6.00922	-16.7074	1	1	1
6.05089	-16.9521	1	1	1
6.09256	-17.1967	1	1	1
6.13422	-17.4516	1	1	1
6.17589	-17.6962	1	1	1
6.21756	-17.9817	1	1	1
6.25922	-18.2365	1	1	1
6.30089	-18.5015	1	1	1
6.34256	-18.7462	1	1	1
6.38422	-19.001	1	1	1
6.42589	-19.2661	1	1	1
6.46756	-19.5209	1	1	1
6.50922	-19.8063	1	1	1
6.55089	-20.0815	1	1	1
6.59256	-20.3772	1	1	1
6.63422	-20.6524	1	1	1
6.67589	-20.948	1	1	1
6.71756	-21.2334	1	1	1
6.75922	-21.5494	1	1	1
6.80089	-21.8451	1	1	1
6.84256	-22.1305	1	1	1
6.88422	-22.4261	1	1	1
6.92589	-22.7115	1	1	1
6.96756	-23.0377	1	1	1
7.00922	-23.2008	1	1	1
7.05089	-23.5474	1	1	1
7.09256	-23.8736	1	1	1
7.13422	-24.2304	1	1	1
7.17589	-24.577	1	1	1
7.21756	-24.9134	1	1	1
7.25922	-25.2701	1	1	1
7.30089	-25.6269	1	1	1
7.34256	-25.9633	1	1	1
7.38422	-26.3303	1	1	1
7.42589	-26.6972	1	1	1
7.46756	-27.1152	1	1	1
7.50922	-27.4822	1	1	1
7.55089	-27.9409	1	1	1
7.59256	-28.3486	1	1	1
7.63422	-28.7564	1	1	1
7.67589	-29.1743	1	1	1
7.71756	-29.5311	1	1	1
7.75922	-29.9185	1	1	1
7.80089	-30.316	1	1	1
7.84256	-30.7441	1	1	1
7.88422	-31.2334	1	1	1
7.92589	-31.7635	1	1	1
7.96756	-32.2528	1	1	1
8.00922	-32.5994	1	1	1
8.05089	-33.2008	1	1	1
8.09256	-33.8022	1	1	1
8.13422	-34.4444	1	1	1
8.17589	-34.9541	1	1	1
8.21756	-35.525	1	1	1
8.25922	-36.1264	1	1	1
8.30089	-36.6667	1	1	1
8.34256	-37.3191	1	1	1
8.38422	-37.9715	1	1	1
8.42589	-38.5729	1	1	1
8.46756	-39.2966	1	1	1
8.50922	-39.9796	1	1	1
8.55089	-40.6728	1	1	1
8.59256	-41.3761	1	1	1
8.63422	-42.1101	1	1	1
8.67589	-42.8848	1	1	1
8.71756	-43.6391	1	1	1
8.75922	-44.4037	1	1	1
8.80784	-45.2905	1	1	1
8.8495	-45.5454	1	1	1
8.89117	-46.7584	1	1	1
8.93284	-47.6453	1	1	1
8.9745	-48.5321	1	1	1
9.01617	-49.5005	1	1	1
9.05784	-50.3262	1	1	1
9.0995	-51.5902	1	1	1
9.14117	-52.8542	1	1	1
9.18284	-54.1896	1	1	1
9.2245	-55.4638	1	1	1
9.26617	-56.8603	1	1	1
9.30784	-58.2773	1	1	1
9.3495	-59.5821	1	1	1
9.39117	-60.9072	1	1	1
9.43284	-62.263	1	1	1
9.4745	-63.7309	1	1	1
9.51617	-65.1478	1	1	1
9.55784	-66.6565	1	1	1
9.5995	-68.1753	1	1	1
9.64117	-69.7044	1	1	1
9.68284	-71.0092	1	1	1
9.7245	-72.2426	1	1	1
9.76617	-73.7411	1	1	1
9.80784	-75.209	1	1	1
9.8495	-76.8807	1	1	1
9.89117	-78.6748	1	1	1
9.93284	-80.4995	1	1	1
9.9745	-82.3751	1	1	1
10.0162	-84.2304	1	1	1
10.0578	-85.739	1	1	1
10.0995	-87.7982	1	1	1
10.1412	-89.9286	1	1	1
10.1828	-91.9572	1	1	1
10.2245	-94.1182	1	1	1
10.2662	-96.2385	1	1	1
10.3078	-98.3384	1	1	1
10.3495	-100.591	1	1	1
10.3912	-102.885	1	1	1
10.4328	-105.229	1	1	1
10.4745	-107.625	1	1	1
10.5162	-109.929	1	1	1
10.5578	-112.365	1	1	1
10.5995	-114.873	1	1	1
10.6412	-117.401	1	1	1
10.6828	-119.847	1	1	1
10.7245	-122.396	1	1	1
10.7662	-124.689	1	1	1
10.8078	-127.258	1	1	1
10.8495	-129.827	1	1	1
10.8912	-132.11	1	1	1
10.9328	-133.925	1	1	1
10.9745	-136.463	1	1	1
11.0162	-138.858	1	1	1
11.0578	-141.06	1	1	1
11.0995	-143.323	1	1	1
11.1412	-145.923	1	1	1
11.1828	-148.318	1	1	1
11.2245	-150.642	1	1	1
11.2662	-152.803	1	1	1
11.3078	-154.893	1	1	1
11.3495	-156.84	1	1	1
11.3912	-158.675	1	1	1
11.4328	-160.571	1	1	1
11.4745	-162.283	1	1	1
11.5162	-163.925	1	1	1
11.5578	-165.474	1	1	1
11.5995	-166.972	1	1	1
11.6412	-168.257	1	1	1
11.6828	-169.011	1	1	1
11.7245	-170.377	1	1	1
11.7662	-171.448	1	1	1
11.8078	-172.701	1	1	1
11.8495	-173.904	1	1	1
11.8912	-175.127	1	1	1
11.9328	-175.729	1	1	1
11.9745	-176.972	1	1	1
12.0162	-178.094	1	1	1
12.0578	-179.093	1	1	1
12.0995	-180.173	1	1	1
12.1412	-181.142	1	1	1
12.1828	-182.12	1	1	1
12.2245	-183.099	1	1	1
12.2662	-183.976	1	1	1
12.3078	-184.944	1	1	1
12.3495	-185.831	1	1	1
12.3912	-186.758	1	1	1
12.4328	-187.645	1	1	1
12.4745	-188.522	1	1	1
12.5162	-189.409	1	1	1
12.5578	-190.265	1	1	1
12.5995	-191.162	1	1	1
12.6412	-192.08	1	1	1
12.6828	-192.813	1	1	1
12.7245	-193.894	1	1	1
12.7662	-194.638	1	1	1
12.8078	-195.78	1	1	1
12.8495	-196.85	1	1	1
12.8912	-197.92	1	1	1
12.9328	-199.001	1	1	1
12.9745	-199.195	1	1	1
13.0162	-201.131	1	1	1
13.0578	-202.589	1	1	1
13.0995	-203.925	1	1	1
13.1412	-205.28	1	1	1
13.1828	-206.799	1	1	1
13.2245	-208.328	1	1	1
13.2662	-209.969	1	1	1
13.3078	-211.723	1	1	1
13.3495	-213.405	1	1	1
13.3912	-215.209	1	1	1
13.4328	-217.197	1	1	1
13.4745	-219.123	1	1	1
13.5162	-221.203	1	1	1
13.5578	-223.537	1	1	1
13.5995	-225.984	1	1	1
13.6412	-228.512	1	1	1
13.6828	-231.131	1	1	1
13.7245	-234.23	1	1	1
13.7662	-237.594	1	1	1
13.8078	-241.101	1	1	1
13.8495	-244.964	1	1	1
13.8912	-245.433	1	1	1
13.9328	-254.027	1	1	1
13.9745	-258.502	1	1	1
14.0162	-265.107	1	1	1
14.0578	-271.203	1	1	1
14.0995	-278.97	1	1	1
14.1412	-287.992	1	1	1
14.1828	-297.9	1	1	1
14.2245	-309.246	1	1	1
14.2662	-322.273	1	1	1
14.3078	-337.941	1	1	1
14.3495	-357.411	1	1	1
14.3912	-381.743	1	1	1
14.4328	-413.394	1	1	1
14.4745	-451.855	1	1	1
14.5162	-495.688	1	1	1
14.5578	-562.671	1	1	1
14.5995	-667.156	1	1	1
14.6412	-843.884	1	1	1
16.315	-8970.44	1	1	1
0.639861	0.904496	2	0	100000
1.05881	0.872395	2	0	100000
1.64543	0.832899	2	0	100000
2.17316	0.801933	2	0	100000
2.67944	0.77105	2	0	100000
2.90606	0.757101	2	0	100000
3.02622	0.749916	2	0	100000
3.64856	0.711639	2	0	100000
4.02706	0.685462	2	0	100000
4.76814	0.634916	2	0	100000
5.15531	0.607353	2	0	100000
5.74788	0.566134	2	0	100000
6.08309	0.54458	2	0	100000
6.78597	0.497689	2	0	100000
7.12581	0.475882	2	0	100000
7.77817	0.436723	2	0	100000
8.1523	0.414454	2	0	100000
8.79434	0.37937	2	0	100000
9.1859	0.356975	2	0	100000
9.73438	0.325504	2	0	100000
10.1012	0.30563	2	0	100000
10.7337	0.270378	2	0	100000
11.0869	0.252311	2	0	100000
11.6689	0.224454	2	0	100000
13.2374	0.165042	2	0	100000
13.8884	0.146597	2	0	100000
14.0842	0.141176	2	0	100000
14.7259	0.124202	2	0	100000
17.7676	0.062479	2	0	100000
18.6064	0.0454575	2	0	100000

## Sheet: tens_interpolation
		Datum / Zeit	Tension unten [hPa]	Tension oben [hPa]
m_bot	b_bot	2012-10-28 17:19:39	-0.25	2.21
3.70286	-152598	2012-10-28 18:29:39	-0.07	2.41
m_top	b_top	2012-10-28 16:26:22	-0.387014	2.05776
4.11429	-169550	y = m*x+b
		AE unten [t]	AE oben [t]
		41227.2
			Brutto-Gewicht [g]	Netto-Gewicht [g]
-1.40314	58626.9	2013-08-23 17:58:52	382.99	12.72
		2013-08-24 10:54:53	382	11.73
-1.40314	58256.7	2013-08-24 06:49:00	382.24	11.9696
			AE unten
m_bot	b_bot	2012-11-12 09:51:43	614.56	44.16
-4.82955	199715	2012-11-15 10:51:45	599.87	29.47
m_top	b_top	2012-11-16 06:59:39	595.819	25.4189
-4.82955	199144	y = m*x+b
