# Supplementary material for: A pore-size classification for peat bogs derived from unsaturated hydraulic properties
Source: Copernicus journal article supplement (doi:10.5194/hess-21-6185-2017), 2017-12-07
Supplement: Supplementary file 6 [file B2_HYDRUS.xlsx]

## Sheet: Gewicht
Datum / Zeit	Brutto-Gewicht [g]	Netto-Gewicht [g]	Gewichtsänderung [g]	Zeitintervall	Tage [d]	cum. Verdunstung [cm]	Verdunstungsrate [cm/d]	Theta [-]	Gewichtsabnahme Probe [g]	Abnahme rate [g]	Verdunstung [cm]	Volumen	242
2012-10-28 16:27:46	799.85	246.75	0					0.960165	246.75			Höhe	5
2012-10-29 07:46:22	787.22	234.12	-12.63	0.637917	0.637917	0.26095	0.409067	0.907975	234.12	12.63	0.26095	A	48.4
2012-10-29 17:49:39	778.69	225.59	-21.16	0.418947	1.05686	0.43719	0.420673	0.872727	225.59	8.53	0.17624	Theta0	0.960165
2012-10-30 07:57:06	768.69	215.59	-31.16	0.588507	1.64537	0.643802	0.351078	0.831405	215.59	10	0.206612	Trockengewicht	14.39
2012-10-30 20:37:02	760.38	207.28	-39.47	0.527731	2.1731	0.815496	0.325344	0.797066	207.28	8.31	0.171694	Ks (as in Ksat)
2012-10-31 08:46:30	752.3	199.2	-47.55	0.506574	2.67968	0.982438	0.329551	0.763678	199.2	8.08	0.166942
2012-10-31 11:18:55	750.6	197.5	-49.25	0.105845	2.78552	1.01756	0.331844	0.756653	197.5	1.7	0.035124
2012-10-31 17:06:03	746.96	193.86	-52.89	0.241065	3.02659	1.09277	0.311977	0.741612	193.86	3.64	0.0752066
2012-11-01 08:02:14	737.22	184.12	-62.63	0.62235	3.64894	1.29401	0.323355	0.701364	184.12	9.74	0.20124
2012-11-01 17:08:45	731.08	177.98	-68.77	0.379525	4.02846	1.42087	0.334258	0.675992	177.98	6.14	0.12686
2012-11-02 10:55:17	719.04	165.94	-80.81	0.740648	4.76911	1.66963	0.335868	0.62624	165.94	12.04	0.24876
2012-11-02 20:12:54	713.03	159.93	-86.82	0.387234	5.15634	1.7938	0.320668	0.601405	159.93	6.01	0.124174
2012-11-03 10:26:27	703.2	150.1	-96.65	0.592743	5.74909	1.9969	0.342643	0.560785	150.1	9.83	0.203099
2012-11-03 18:28:55	698.19	145.09	-101.66	0.335046	6.08413	2.10041	0.30895	0.540083	145.09	5.01	0.103512
2012-11-04 11:21:35	687.92	134.82	-111.93	0.703241	6.78737	2.3126	0.301732	0.497645	134.82	10.27	0.21219
2012-11-04 19:30:36	683.26	130.16	-116.59	0.339595	7.12697	2.40888	0.283517	0.478388	130.16	4.66	0.096281
2012-11-05 11:10:15	674.7	121.6	-125.15	0.652535	7.7795	2.58574	0.271035	0.443017	121.6	8.56	0.17686
2012-11-05 20:08:00	669.53	116.43	-130.32	0.373437	8.15294	2.69256	0.28604	0.421653	116.43	5.17	0.106818
2012-11-06 11:27:54	661.2	108.1	-138.65	0.638819	8.79176	2.86467	0.269415	0.387231	108.1	8.33	0.172107
2012-11-06 20:55:57	655.5	102.4	-144.35	0.394479	9.18624	2.98244	0.298542	0.363678	102.4	5.7	0.117769
2012-11-07 10:01:49	648.27	95.17	-151.58	0.545741	9.73198	3.13182	0.27372	0.333802	95.17	7.23	0.14938
2012-11-07 18:54:05	643.76	90.66	-156.09	0.36963	10.1016	3.225	0.252095	0.315165	90.66	4.51	0.0931818
2012-11-08 10:05:14	635.73	82.63	-164.12	0.632743	10.7344	3.39091	0.262206	0.281983	82.63	8.03	0.165909
2012-11-08 18:33:45	631.14	78.04	-168.71	0.353137	11.0875	3.48574	0.26855	0.263017	78.04	4.59	0.0948347
2012-11-09 08:31:08	623.55	70.45	-176.3	0.581516	11.669	3.64256	0.269671	0.231653	70.45	7.59	0.156818
2012-11-10 22:10:51	608.42	55.32	-191.43	1.56925	13.2383	3.95517	0.199206	0.169132	55.32	15.13	0.312603
2012-11-11 13:47:03	604.48	51.38	-195.37	0.650139	13.8884	4.03657	0.125212	0.152851	51.38	3.94	0.081405
2012-11-11 18:29:40	603.29	50.19	-196.56	0.196262	14.0847	4.06116	0.125276	0.147934	50.19	1.19	0.0245868
2012-11-12 09:54:02	599.67	46.57	-200.18	0.641921	14.7266	4.13595	0.116515	0.132975	46.57	3.62	0.0747934
2012-11-15 10:53:48	586.02	32.92	-213.83	3.0415	17.7681	4.41798	0.0927254	0.0765702	32.92	13.65	0.282025

## Sheet: Evap_Theta
Zeit	cum. Verdunstung [cm]	Verdunstungsrate [cm/d]	Theta [-]
0.637917	0.26095	0.409067	0.907975
1.05686	0.43719	0.420673	0.872727
1.64537	0.643802	0.351078	0.831405
2.1731	0.815496	0.325344	0.797066
2.67968	0.982438	0.329551	0.763678
2.78552	1.01756	0.331844	0.756653
2.78786	1.01756	0	0.756653
3.02659	1.09277	0.315032	0.741612
3.64894	1.29401	0.323355	0.701364
4.02846	1.42087	0.334258	0.675992
4.76911	1.66963	0.335868	0.62624
5.15634	1.7938	0.320668	0.601405
5.74909	1.9969	0.342643	0.560785
6.08413	2.10041	0.30895	0.540083
6.78737	2.3126	0.301732	0.497645
7.12697	2.40888	0.283517	0.478388
7.7795	2.58574	0.271035	0.443017
8.15294	2.69256	0.28604	0.421653
8.79176	2.86467	0.269415	0.387231
9.18624	2.98244	0.298542	0.363678
9.73198	3.13182	0.27372	0.333802
10.1016	3.225	0.252095	0.315165
10.7344	3.39091	0.262206	0.281983
11.0875	3.48574	0.26855	0.263017
11.669	3.64256	0.269671	0.231653
13.2383	3.95517	0.199206	0.169132
13.8884	4.03657	0.125212	0.152851
14.0847	4.06116	0.125276	0.147934
14.7266	4.13595	0.116515	0.132975
17.7681	4.41798	0.0927254	0.0765702

## Sheet: Tensionen
Datum / Zeit	Tension unten [hPa]	Tension oben [hPa]	Datum / Zeit	Zeit [d]		Zeit [d]	MP bot(2) [cm]	MP top(1) [cm]
2012-10-28 16:27:46	-0.3787	2.09942	41210.7	0	41210.7	0	0.386035	-2.14008
2012-10-28 16:29:39	-0.39	2.09	41210.7	0.00130787		0.00130787	0.397554	-2.13048
2012-10-28 16:39:39	-0.35	2.09	41210.7	0.00825231		0.00825231	0.356779	-2.13048
2012-10-28 16:49:39	-0.32	2.13	41210.7	0.0151968		0.0151968	0.326198	-2.17125
2012-10-28 16:59:39	-0.27	2.18	41210.7	0.0221412		0.0221412	0.275229	-2.22222
2012-10-28 17:09:39	-0.2	2.25	41210.7	0.0290856		0.0290856	0.203874	-2.29358
2012-10-28 17:19:39	-0.14	2.31	41210.7	0.0360301		0.0360301	0.142712	-2.35474
2012-10-28 17:29:39	-0.06	2.39	41210.7	0.0429745	41210.7	0.0429745	0.0611621	-2.43629
2012-10-28 17:39:39	-0.02	2.42	41210.7	0.049919		0.049919	0.0203874	-2.46687
2012-10-28 17:49:39	0.02	2.47	41210.7	0.0568634		0.0568634	-0.0203874	-2.51784
2012-10-28 17:59:39	0.09	2.53	41210.7	0.0638079		0.0638079	-0.0917431	-2.579
2012-10-28 18:09:39	0.15	2.6	41210.8	0.0707523		0.0707523	-0.152905	-2.65036
2012-10-28 18:19:39	0.21	2.66	41210.8	0.0776968		0.0776968	-0.214067	-2.71152
2012-10-28 18:29:39	0.24	2.68	41210.8	0.0846412	41210.8	0.0846412	-0.244648	-2.73191
2012-10-28 18:39:39	0.3	2.75	41210.8	0.0915856		0.0915856	-0.30581	-2.80326
2012-10-28 18:49:39	0.35	2.8	41210.8	0.0985301		0.0985301	-0.356779	-2.85423
2012-10-28 18:59:39	0.42	2.87	41210.8	0.105475		0.105475	-0.428135	-2.92559
2012-10-28 19:09:39	0.46	2.92	41210.8	0.112419		0.112419	-0.468909	-2.97655
2012-10-28 19:19:39	0.51	2.97	41210.8	0.119363		0.119363	-0.519878	-3.02752
2012-10-28 19:29:39	0.56	3.02	41210.8	0.126308	41210.8	0.126308	-0.570846	-3.07849
2012-10-28 19:39:39	0.58	3.05	41210.8	0.133252		0.133252	-0.591233	-3.10907
2012-10-28 19:49:39	0.63	3.09	41210.8	0.140197		0.140197	-0.642202	-3.14985
2012-10-28 19:59:39	0.66	3.13	41210.8	0.147141		0.147141	-0.672783	-3.19062
2012-10-28 20:09:39	0.65	3.12	41210.8	0.154086		0.154086	-0.662589	-3.18043
2012-10-28 20:19:39	0.7	3.17	41210.8	0.16103		0.16103	-0.713558	-3.2314
2012-10-28 20:29:39	0.76	3.22	41210.9	0.167975	41210.9	0.167975	-0.77472	-3.28236
2012-10-28 20:39:39	0.81	3.28	41210.9	0.174919		0.174919	-0.825688	-3.34353
2012-10-28 20:49:39	0.86	3.33	41210.9	0.181863		0.181863	-0.876656	-3.3945
2012-10-28 20:59:39	0.9	3.38	41210.9	0.188808		0.188808	-0.917431	-3.44546
2012-10-28 21:09:39	0.95	3.42	41210.9	0.195752		0.195752	-0.9684	-3.48624
2012-10-28 21:19:39	0.95	3.43	41210.9	0.202697		0.202697	-0.9684	-3.49643
2012-10-28 21:29:39	1.02	3.5	41210.9	0.209641	41210.9	0.209641	-1.03976	-3.56779
2012-10-28 21:39:39	1.06	3.54	41210.9	0.216586		0.216586	-1.08053	-3.60856
2012-10-28 21:49:39	1.1	3.58	41210.9	0.22353		0.22353	-1.1213	-3.64934
2012-10-28 21:59:39	1.14	3.62	41210.9	0.230475		0.230475	-1.16208	-3.69011
2012-10-28 22:09:39	1.19	3.67	41210.9	0.237419		0.237419	-1.21305	-3.74108
2012-10-28 22:19:39	1.23	3.71	41210.9	0.244363		0.244363	-1.25382	-3.78186
2012-10-28 22:29:39	1.29	3.77	41210.9	0.251308	41210.9	0.251308	-1.31498	-3.84302
2012-10-28 22:39:39	1.33	3.82	41210.9	0.258252		0.258252	-1.35576	-3.89399
2012-10-28 22:49:39	1.39	3.88	41211	0.265197		0.265197	-1.41692	-3.95515
2012-10-28 22:59:39	1.44	3.92	41211	0.272141		0.272141	-1.46789	-3.99592
2012-10-28 23:09:39	1.48	3.95	41211	0.279086		0.279086	-1.50866	-4.0265
2012-10-28 23:19:39	1.48	3.97	41211	0.28603		0.28603	-1.50866	-4.04689
2012-10-28 23:29:39	1.54	4.02	41211	0.292975	41211	0.292975	-1.56983	-4.09786
2012-10-28 23:39:39	1.58	4.06	41211	0.299919		0.299919	-1.6106	-4.13863
2012-10-28 23:49:39	1.6	4.09	41211	0.306863		0.306863	-1.63099	-4.16922
2012-10-28 23:59:39	1.6	4.09	41211	0.313808		0.313808	-1.63099	-4.16922
2012-10-29 00:09:39	1.64	4.13	41211	0.320752		0.320752	-1.67176	-4.20999
2012-10-29 00:19:39	1.61	4.08	41211	0.327697		0.327697	-1.64118	-4.15902
2012-10-29 00:29:39	1.64	4.14	41211	0.334641	41211	0.334641	-1.67176	-4.22018
2012-10-29 00:39:39	1.68	4.18	41211	0.341586		0.341586	-1.71254	-4.26096
2012-10-29 00:49:39	1.73	4.22	41211	0.34853		0.34853	-1.76351	-4.30173
2012-10-29 00:59:39	1.74	4.23	41211	0.355475		0.355475	-1.7737	-4.31193
2012-10-29 01:09:39	1.69	4.17	41211	0.362419		0.362419	-1.72273	-4.25076
2012-10-29 01:19:39	1.75	4.25	41211.1	0.369363		0.369363	-1.78389	-4.33231
2012-10-29 01:29:39	1.78	4.27	41211.1	0.376308	41211.1	0.376308	-1.81448	-4.3527
2012-10-29 01:39:39	1.71	4.2	41211.1	0.383252		0.383252	-1.74312	-4.28135
2012-10-29 01:49:39	1.79	4.29	41211.1	0.390197		0.390197	-1.82467	-4.37309
2012-10-29 01:59:39	1.84	4.34	41211.1	0.397141		0.397141	-1.87564	-4.42406
2012-10-29 02:09:39	1.85	4.35	41211.1	0.404086		0.404086	-1.88583	-4.43425
2012-10-29 02:19:39	1.91	4.4	41211.1	0.41103		0.41103	-1.94699	-4.48522
2012-10-29 02:29:39	1.86	4.36	41211.1	0.417975	41211.1	0.417975	-1.89602	-4.44444
2012-10-29 02:39:39	1.89	4.39	41211.1	0.424919		0.424919	-1.92661	-4.47503
2012-10-29 02:49:39	1.92	4.43	41211.1	0.431863		0.431863	-1.95719	-4.5158
2012-10-29 02:59:39	1.97	4.47	41211.1	0.438808		0.438808	-2.00815	-4.55657
2012-10-29 03:09:39	1.96	4.46	41211.1	0.445752		0.445752	-1.99796	-4.54638
2012-10-29 03:19:39	2.03	4.5	41211.1	0.452697		0.452697	-2.06932	-4.58716
2012-10-29 03:29:39	2.06	4.54	41211.1	0.459641	41211.1	0.459641	-2.0999	-4.62793
2012-10-29 03:39:39	2.09	4.56	41211.2	0.466586		0.466586	-2.13048	-4.64832
2012-10-29 03:49:39	2.1	4.6	41211.2	0.47353		0.47353	-2.14067	-4.68909
2012-10-29 03:59:39	2.16	4.62	41211.2	0.480475		0.480475	-2.20183	-4.70948
2012-10-29 04:09:39	2.18	4.65	41211.2	0.487419		0.487419	-2.22222	-4.74006
2012-10-29 04:19:39	2.18	4.68	41211.2	0.494363		0.494363	-2.22222	-4.77064
2012-10-29 04:29:39	2.23	4.73	41211.2	0.501308	41211.2	0.501308	-2.27319	-4.82161
2012-10-29 04:39:39	2.17	4.66	41211.2	0.508252		0.508252	-2.21203	-4.75025
2012-10-29 04:49:39	2.23	4.73	41211.2	0.515197		0.515197	-2.27319	-4.82161
2012-10-29 04:59:39	2.24	4.74	41211.2	0.522141		0.522141	-2.28338	-4.8318
2012-10-29 05:09:39	2.26	4.77	41211.2	0.529086		0.529086	-2.30377	-4.86239
2012-10-29 05:19:39	2.2	4.7	41211.2	0.53603		0.53603	-2.24261	-4.79103
2012-10-29 05:29:39	2.26	4.76	41211.2	0.542975	41211.2	0.542975	-2.30377	-4.85219
2012-10-29 05:39:39	2.15	4.65	41211.2	0.549919		0.549919	-2.19164	-4.74006
2012-10-29 05:49:39	2.23	4.73	41211.2	0.556863		0.556863	-2.27319	-4.82161
2012-10-29 05:59:39	2.29	4.8	41211.2	0.563808		0.563808	-2.33435	-4.89297
2012-10-29 06:09:39	2.32	4.82	41211.3	0.570752		0.570752	-2.36493	-4.91335
2012-10-29 06:19:39	2.36	4.86	41211.3	0.577697		0.577697	-2.40571	-4.95413
2012-10-29 06:29:39	2.41	4.91	41211.3	0.584641	41211.3	0.584641	-2.45668	-5.0051
2012-10-29 06:39:39	2.44	4.94	41211.3	0.591586		0.591586	-2.48726	-5.03568
2012-10-29 06:49:39	2.46	4.97	41211.3	0.59853		0.59853	-2.50765	-5.06626
2012-10-29 06:59:39	2.49	4.97	41211.3	0.605475		0.605475	-2.53823	-5.06626
2012-10-29 07:09:39	2.53	5.03	41211.3	0.612419		0.612419	-2.579	-5.12742
2012-10-29 07:19:39	2.47	4.97	41211.3	0.619363		0.619363	-2.51784	-5.06626
2012-10-29 07:29:39	2.55	5.06	41211.3	0.626308	41211.3	0.626308	-2.59939	-5.158
2012-10-29 07:39:39	2.56	5.06	41211.3	0.633252		0.633252	-2.60958	-5.158
2012-10-29 07:49:39	2.48	5	41211.3	0.640197		0.640197	-2.52803	-5.09684
2012-10-29 07:59:39	2.5	5.01	41211.3	0.647141		0.647141	-2.54842	-5.10703
2012-10-29 08:09:39	2.57	5.08	41211.3	0.654086		0.654086	-2.61978	-5.17839
2012-10-29 08:19:39	2.62	5.14	41211.3	0.66103		0.66103	-2.67074	-5.23955
2012-10-29 08:29:39	2.64	5.14	41211.4	0.667975	41211.4	0.667975	-2.69113	-5.23955
2012-10-29 08:39:39	2.68	5.19	41211.4	0.674919		0.674919	-2.73191	-5.29052
2012-10-29 08:49:39	2.74	5.23	41211.4	0.681863		0.681863	-2.79307	-5.33129
2012-10-29 08:59:39	2.79	5.3	41211.4	0.688808		0.688808	-2.84404	-5.40265
2012-10-29 09:09:39	2.73	5.25	41211.4	0.695752		0.695752	-2.78287	-5.35168
2012-10-29 09:19:39	2.8	5.32	41211.4	0.702697		0.702697	-2.85423	-5.42304
2012-10-29 09:29:39	2.79	5.31	41211.4	0.709641	41211.4	0.709641	-2.84404	-5.41284
2012-10-29 09:39:39	2.84	5.35	41211.4	0.716586		0.716586	-2.89501	-5.45362
2012-10-29 09:49:39	2.81	5.33	41211.4	0.72353		0.72353	-2.86442	-5.43323
2012-10-29 09:59:39	2.84	5.37	41211.4	0.730475		0.730475	-2.89501	-5.47401
2012-10-29 10:09:39	2.88	5.4	41211.4	0.737419		0.737419	-2.93578	-5.50459
2012-10-29 10:19:39	2.88	5.4	41211.4	0.744363		0.744363	-2.93578	-5.50459
2012-10-29 10:29:39	2.87	5.39	41211.4	0.751308	41211.4	0.751308	-2.92559	-5.49439
2012-10-29 10:39:39	2.91	5.43	41211.4	0.758252		0.758252	-2.96636	-5.53517
2012-10-29 10:49:39	2.94	5.46	41211.5	0.765197		0.765197	-2.99694	-5.56575
2012-10-29 10:59:39	2.96	5.48	41211.5	0.772141		0.772141	-3.01733	-5.58614
2012-10-29 11:09:39	2.96	5.48	41211.5	0.779086		0.779086	-3.01733	-5.58614
2012-10-29 11:19:39	2.95	5.47	41211.5	0.78603		0.78603	-3.00714	-5.57594
2012-10-29 11:29:39	2.99	5.52	41211.5	0.792975	41211.5	0.792975	-3.04791	-5.62691
2012-10-29 11:39:39	3.03	5.55	41211.5	0.799919		0.799919	-3.08869	-5.65749
2012-10-29 11:49:39	3.06	5.58	41211.5	0.806863		0.806863	-3.11927	-5.68807
2012-10-29 11:59:39	3.08	5.61	41211.5	0.813808		0.813808	-3.13965	-5.71865
2012-10-29 12:09:39	3.12	5.64	41211.5	0.820752		0.820752	-3.18043	-5.74924
2012-10-29 12:19:39	3.13	5.65	41211.5	0.827697		0.827697	-3.19062	-5.75943
2012-10-29 12:29:39	3.16	5.65	41211.5	0.834641	41211.5	0.834641	-3.2212	-5.75943
2012-10-29 12:39:39	3.12	5.61	41211.5	0.841586		0.841586	-3.18043	-5.71865
2012-10-29 12:49:39	3.19	5.68	41211.5	0.84853		0.84853	-3.25178	-5.79001
2012-10-29 12:59:39	3.19	5.7	41211.5	0.855475		0.855475	-3.25178	-5.8104
2012-10-29 13:09:39	3.02	5.53	41211.5	0.862419		0.862419	-3.07849	-5.6371
2012-10-29 13:19:39	3.11	5.62	41211.6	0.869363		0.869363	-3.17023	-5.72885
2012-10-29 13:29:39	3.16	5.65	41211.6	0.876308	41211.6	0.876308	-3.2212	-5.75943
2012-10-29 13:39:39	2.98	5.49	41211.6	0.883252		0.883252	-3.03772	-5.59633
2012-10-29 13:49:39	3.04	5.56	41211.6	0.890197		0.890197	-3.09888	-5.66769
2012-10-29 13:59:39	3.11	5.63	41211.6	0.897141		0.897141	-3.17023	-5.73904
2012-10-29 14:09:39	3.14	5.66	41211.6	0.904086		0.904086	-3.20082	-5.76962
2012-10-29 14:19:39	3.18	5.7	41211.6	0.91103		0.91103	-3.24159	-5.8104
2012-10-29 14:29:39	3.2	5.73	41211.6	0.917975	41211.6	0.917975	-3.26198	-5.84098
2012-10-29 14:39:39	3.24	5.76	41211.6	0.924919		0.924919	-3.30275	-5.87156
2012-10-29 14:49:39	3.25	5.75	41211.6	0.931863		0.931863	-3.31295	-5.86137
2012-10-29 14:59:39	3.26	5.79	41211.6	0.938808		0.938808	-3.32314	-5.90214
2012-10-29 15:09:39	3.27	5.79	41211.6	0.945752		0.945752	-3.33333	-5.90214
2012-10-29 15:19:39	3.29	5.79	41211.6	0.952697		0.952697	-3.35372	-5.90214
2012-10-29 15:29:39	3.31	5.83	41211.6	0.959641	41211.6	0.959641	-3.37411	-5.94292
2012-10-29 15:39:39	3.32	5.84	41211.7	0.966586		0.966586	-3.3843	-5.95311
2012-10-29 15:49:39	3.34	5.86	41211.7	0.97353		0.97353	-3.40469	-5.9735
2012-10-29 15:59:39	3.36	5.88	41211.7	0.980475		0.980475	-3.42508	-5.99388
2012-10-29 16:09:39	3.39	5.91	41211.7	0.987419		0.987419	-3.45566	-6.02446
2012-10-29 16:19:39	3.42	5.94	41211.7	0.994363		0.994363	-3.48624	-6.05505
2012-10-29 16:29:39	3.24	5.75	41211.7	1.00131	41211.7	1.00131	-3.30275	-5.86137
2012-10-29 16:39:39	3.3	5.82	41211.7	1.00825		1.00825	-3.36391	-5.93272
2012-10-29 16:49:39	3.35	5.86	41211.7	1.0152		1.0152	-3.41488	-5.9735
2012-10-29 16:59:39	3.38	5.9	41211.7	1.02214		1.02214	-3.44546	-6.01427
2012-10-29 17:09:39	2.9	5.42	41211.7	1.02909		1.02909	-2.95617	-5.52497
2012-10-29 17:19:39	2.93	5.45	41211.7	1.03603		1.03603	-2.98675	-5.55556
2012-10-29 17:29:39	2.97	5.48	41211.7	1.04297	41211.7	1.04297	-3.02752	-5.58614
2012-10-29 17:39:39	2.99	5.51	41211.7	1.04992		1.04992	-3.04791	-5.61672
2012-10-29 17:49:39	3.01	5.44	41211.7	1.05686		1.05686	-3.0683	-5.54536
2012-10-29 17:59:39	3.03	5.55	41211.7	1.06381		1.06381	-3.08869	-5.65749
2012-10-29 18:09:39	3.06	5.58	41211.8	1.07075		1.07075	-3.11927	-5.68807
2012-10-29 18:19:39	3.08	5.62	41211.8	1.0777		1.0777	-3.13965	-5.72885
2012-10-29 18:29:39	3.12	5.66	41211.8	1.08464	41211.8	1.08464	-3.18043	-5.76962
2012-10-29 18:39:39	3.15	5.68	41211.8	1.09159		1.09159	-3.21101	-5.79001
2012-10-29 18:49:39	3.19	5.72	41211.8	1.09853		1.09853	-3.25178	-5.83078
2012-10-29 18:59:39	3.22	5.75	41211.8	1.10547		1.10547	-3.28236	-5.86137
2012-10-29 19:09:39	3.26	5.78	41211.8	1.11242		1.11242	-3.32314	-5.89195
2012-10-29 19:19:39	3.29	5.79	41211.8	1.11936		1.11936	-3.35372	-5.90214
2012-10-29 19:29:39	3.22	5.74	41211.8	1.12631	41211.8	1.12631	-3.28236	-5.85117
2012-10-29 19:39:39	3.28	5.8	41211.8	1.13325		1.13325	-3.34353	-5.91233
2012-10-29 19:49:39	3.27	5.79	41211.8	1.1402		1.1402	-3.33333	-5.90214
2012-10-29 19:59:39	3.3	5.84	41211.8	1.14714		1.14714	-3.36391	-5.95311
2012-10-29 20:09:39	3.32	5.85	41211.8	1.15409		1.15409	-3.3843	-5.9633
2012-10-29 20:19:39	3.35	5.89	41211.8	1.16103		1.16103	-3.41488	-6.00408
2012-10-29 20:29:39	3.37	5.9	41211.9	1.16797	41211.9	1.16797	-3.43527	-6.01427
2012-10-29 20:39:39	3.41	5.94	41211.9	1.17492		1.17492	-3.47604	-6.05505
2012-10-29 20:49:39	3.39	5.92	41211.9	1.18186		1.18186	-3.45566	-6.03466
2012-10-29 20:59:39	3.42	5.96	41211.9	1.18881		1.18881	-3.48624	-6.07543
2012-10-29 21:09:39	3.47	5.99	41211.9	1.19575		1.19575	-3.53721	-6.10601
2012-10-29 21:19:39	3.5	6.03	41211.9	1.2027		1.2027	-3.56779	-6.14679
2012-10-29 21:29:39	3.52	6.05	41211.9	1.20964	41211.9	1.20964	-3.58818	-6.16718
2012-10-29 21:39:39	3.54	6.08	41211.9	1.21659		1.21659	-3.60856	-6.19776
2012-10-29 21:49:39	3.57	6.1	41211.9	1.22353		1.22353	-3.63914	-6.21814
2012-10-29 21:59:39	3.6	6.13	41211.9	1.23047		1.23047	-3.66972	-6.24873
2012-10-29 22:09:39	3.62	6.16	41211.9	1.23742		1.23742	-3.69011	-6.27931
2012-10-29 22:19:39	3.65	6.18	41211.9	1.24436		1.24436	-3.72069	-6.29969
2012-10-29 22:29:39	3.66	6.2	41211.9	1.25131	41211.9	1.25131	-3.73089	-6.32008
2012-10-29 22:39:39	3.59	6.13	41211.9	1.25825		1.25825	-3.65953	-6.24873
2012-10-29 22:49:39	3.64	6.18	41212	1.2652		1.2652	-3.7105	-6.29969
2012-10-29 22:59:39	3.67	6.22	41212	1.27214		1.27214	-3.74108	-6.34047
2012-10-29 23:09:39	3.71	6.25	41212	1.27909		1.27909	-3.78186	-6.37105
2012-10-29 23:19:39	3.7	6.24	41212	1.28603		1.28603	-3.77166	-6.36086
2012-10-29 23:29:39	3.72	6.26	41212	1.29297	41212	1.29297	-3.79205	-6.38124
2012-10-29 23:39:39	3.73	6.25	41212	1.29992		1.29992	-3.80224	-6.37105
2012-10-29 23:49:39	3.77	6.31	41212	1.30686		1.30686	-3.84302	-6.43221
2012-10-29 23:59:39	3.75	6.29	41212	1.31381		1.31381	-3.82263	-6.41182
2012-10-30 00:09:39	3.78	6.32	41212	1.32075		1.32075	-3.85321	-6.44241
2012-10-30 00:19:39	3.48	6.02	41212	1.3277		1.3277	-3.5474	-6.1366
2012-10-30 00:29:39	3.51	6.05	41212	1.33464	41212	1.33464	-3.57798	-6.16718
2012-10-30 00:39:39	3.53	6.07	41212	1.34159		1.34159	-3.59837	-6.18756
2012-10-30 00:49:39	3.55	6.09	41212	1.34853		1.34853	-3.61876	-6.20795
2012-10-30 00:59:39	3.57	6.11	41212	1.35547		1.35547	-3.63914	-6.22834
2012-10-30 01:09:39	3.61	6.14	41212	1.36242		1.36242	-3.67992	-6.25892
2012-10-30 01:19:39	3.64	6.17	41212.1	1.36936		1.36936	-3.7105	-6.2895
2012-10-30 01:29:39	3.67	6.21	41212.1	1.37631	41212.1	1.37631	-3.74108	-6.33028
2012-10-30 01:39:39	3.68	6.21	41212.1	1.38325		1.38325	-3.75127	-6.33028
2012-10-30 01:49:39	3.71	6.25	41212.1	1.3902		1.3902	-3.78186	-6.37105
2012-10-30 01:59:39	3.73	6.27	41212.1	1.39714		1.39714	-3.80224	-6.39144
2012-10-30 02:09:39	3.76	6.3	41212.1	1.40409		1.40409	-3.83282	-6.42202
2012-10-30 02:19:39	3.78	6.31	41212.1	1.41103		1.41103	-3.85321	-6.43221
2012-10-30 02:29:39	3.8	6.34	41212.1	1.41797	41212.1	1.41797	-3.8736	-6.46279
2012-10-30 02:39:39	3.81	6.35	41212.1	1.42492		1.42492	-3.88379	-6.47299
2012-10-30 02:49:39	3.83	6.36	41212.1	1.43186		1.43186	-3.90418	-6.48318
2012-10-30 02:59:39	3.85	6.39	41212.1	1.43881		1.43881	-3.92457	-6.51376
2012-10-30 03:09:39	3.86	6.39	41212.1	1.44575		1.44575	-3.93476	-6.51376
2012-10-30 03:19:39	3.88	6.42	41212.1	1.4527		1.4527	-3.95515	-6.54434
2012-10-30 03:29:39	3.9	6.44	41212.1	1.45964	41212.1	1.45964	-3.97554	-6.56473
2012-10-30 03:39:39	3.9	6.44	41212.2	1.46659		1.46659	-3.97554	-6.56473
2012-10-30 03:49:39	3.94	6.48	41212.2	1.47353		1.47353	-4.01631	-6.6055
2012-10-30 03:59:39	3.94	6.48	41212.2	1.48047		1.48047	-4.01631	-6.6055
2012-10-30 04:09:39	3.96	6.5	41212.2	1.48742		1.48742	-4.0367	-6.62589
2012-10-30 04:19:39	3.96	6.5	41212.2	1.49436		1.49436	-4.0367	-6.62589
2012-10-30 04:29:39	3.98	6.52	41212.2	1.50131	41212.2	1.50131	-4.05708	-6.64628
2012-10-30 04:39:39	3.78	6.32	41212.2	1.50825		1.50825	-3.85321	-6.44241
2012-10-30 04:49:39	3.87	6.4	41212.2	1.5152		1.5152	-3.94495	-6.52396
2012-10-30 04:59:39	3.89	6.43	41212.2	1.52214		1.52214	-3.96534	-6.55454
2012-10-30 05:09:39	3.93	6.47	41212.2	1.52909		1.52909	-4.00612	-6.59531
2012-10-30 05:19:39	3.94	6.5	41212.2	1.53603		1.53603	-4.01631	-6.62589
2012-10-30 05:29:39	3.96	6.5	41212.2	1.54297	41212.2	1.54297	-4.0367	-6.62589
2012-10-30 05:39:39	3.98	6.52	41212.2	1.54992		1.54992	-4.05708	-6.64628
2012-10-30 05:49:39	3.98	6.52	41212.2	1.55686		1.55686	-4.05708	-6.64628
2012-10-30 05:59:39	4	6.54	41212.2	1.56381		1.56381	-4.07747	-6.66667
2012-10-30 06:09:39	4.01	6.55	41212.3	1.57075		1.57075	-4.08767	-6.67686
2012-10-30 06:19:39	4.02	6.57	41212.3	1.5777		1.5777	-4.09786	-6.69725
2012-10-30 06:29:39	4.04	6.57	41212.3	1.58464	41212.3	1.58464	-4.11825	-6.69725
2012-10-30 06:39:39	4.03	6.58	41212.3	1.59159		1.59159	-4.10805	-6.70744
2012-10-30 06:49:39	4.03	6.58	41212.3	1.59853		1.59853	-4.10805	-6.70744
2012-10-30 06:59:39	4.04	6.58	41212.3	1.60547		1.60547	-4.11825	-6.70744
2012-10-30 07:09:39	4.07	6.6	41212.3	1.61242		1.61242	-4.14883	-6.72783
2012-10-30 07:19:39	4.09	6.62	41212.3	1.61936		1.61936	-4.16922	-6.74822
2012-10-30 07:29:39	4.11	6.64	41212.3	1.62631	41212.3	1.62631	-4.1896	-6.7686
2012-10-30 07:39:39	4.09	6.63	41212.3	1.63325		1.63325	-4.16922	-6.75841
2012-10-30 07:49:39	4.15	6.67	41212.3	1.6402		1.6402	-4.23038	-6.79918
2012-10-30 07:59:39	4.03	6.56	41212.3	1.64714		1.64714	-4.10805	-6.68705
2012-10-30 08:09:39	4	6.55	41212.3	1.65409		1.65409	-4.07747	-6.67686
2012-10-30 08:19:39	4.04	6.59	41212.3	1.66103		1.66103	-4.11825	-6.71764
2012-10-30 08:29:39	4.08	6.62	41212.4	1.66797	41212.4	1.66797	-4.15902	-6.74822
2012-10-30 08:39:39	4.11	6.65	41212.4	1.67492		1.67492	-4.1896	-6.7788
2012-10-30 08:49:39	4.13	6.67	41212.4	1.68186		1.68186	-4.20999	-6.79918
2012-10-30 08:59:39	4.14	6.69	41212.4	1.68881		1.68881	-4.22018	-6.81957
2012-10-30 09:09:39	4.17	6.71	41212.4	1.69575		1.69575	-4.25076	-6.83996
2012-10-30 09:19:39	4.19	6.73	41212.4	1.7027		1.7027	-4.27115	-6.86035
2012-10-30 09:29:39	4.17	6.71	41212.4	1.70964	41212.4	1.70964	-4.25076	-6.83996
2012-10-30 09:39:39	4.18	6.72	41212.4	1.71659		1.71659	-4.26096	-6.85015
2012-10-30 09:49:39	4.19	6.73	41212.4	1.72353		1.72353	-4.27115	-6.86035
2012-10-30 09:59:39	4.19	6.74	41212.4	1.73047		1.73047	-4.27115	-6.87054
2012-10-30 10:09:39	4.17	6.72	41212.4	1.73742		1.73742	-4.25076	-6.85015
2012-10-30 10:19:39	4.19	6.71	41212.4	1.74436		1.74436	-4.27115	-6.83996
2012-10-30 10:29:39	4.21	6.72	41212.4	1.75131	41212.4	1.75131	-4.29154	-6.85015
2012-10-30 10:39:39	4.2	6.72	41212.4	1.75825		1.75825	-4.28135	-6.85015
2012-10-30 10:49:39	4.19	6.73	41212.5	1.7652		1.7652	-4.27115	-6.86035
2012-10-30 10:59:39	4.23	6.74	41212.5	1.77214		1.77214	-4.31193	-6.87054
2012-10-30 11:09:39	4.25	6.77	41212.5	1.77909		1.77909	-4.33231	-6.90112
2012-10-30 11:19:39	4.23	6.75	41212.5	1.78603		1.78603	-4.31193	-6.88073
2012-10-30 11:29:39	4.27	6.79	41212.5	1.79297	41212.5	1.79297	-4.3527	-6.92151
2012-10-30 11:39:39	4.29	6.82	41212.5	1.79992		1.79992	-4.37309	-6.95209
2012-10-30 11:49:39	4.31	6.82	41212.5	1.80686		1.80686	-4.39348	-6.95209
2012-10-30 11:59:39	4.3	6.81	41212.5	1.81381		1.81381	-4.38328	-6.9419
2012-10-30 12:09:39	4.31	6.85	41212.5	1.82075		1.82075	-4.39348	-6.98267
2012-10-30 12:19:39	4.32	6.84	41212.5	1.8277		1.8277	-4.40367	-6.97248
2012-10-30 12:29:39	4.32	6.84	41212.5	1.83464	41212.5	1.83464	-4.40367	-6.97248
2012-10-30 12:39:39	4.35	6.86	41212.5	1.84159		1.84159	-4.43425	-6.99286
2012-10-30 12:49:39	4.35	6.87	41212.5	1.84853		1.84853	-4.43425	-7.00306
2012-10-30 12:59:39	4.38	6.92	41212.5	1.85547		1.85547	-4.46483	-7.05403
2012-10-30 13:09:39	4.41	6.93	41212.5	1.86242		1.86242	-4.49541	-7.06422
2012-10-30 13:19:39	4.43	6.94	41212.6	1.86936		1.86936	-4.5158	-7.07441
2012-10-30 13:29:39	4.46	6.97	41212.6	1.87631	41212.6	1.87631	-4.54638	-7.10499
2012-10-30 13:39:39	4.46	6.97	41212.6	1.88325		1.88325	-4.54638	-7.10499
2012-10-30 13:49:39	4.49	6.99	41212.6	1.8902		1.8902	-4.57696	-7.12538
2012-10-30 13:59:39	4.5	7.01	41212.6	1.89714		1.89714	-4.58716	-7.14577
2012-10-30 14:09:39	4.52	7.05	41212.6	1.90409		1.90409	-4.60754	-7.18654
2012-10-30 14:19:39	4.5	7.04	41212.6	1.91103		1.91103	-4.58716	-7.17635
2012-10-30 14:29:39	4.5	7.02	41212.6	1.91797	41212.6	1.91797	-4.58716	-7.15596
2012-10-30 14:39:39	4.51	7.03	41212.6	1.92492		1.92492	-4.59735	-7.16616
2012-10-30 14:49:39	4.5	7.03	41212.6	1.93186		1.93186	-4.58716	-7.16616
2012-10-30 14:59:39	4.53	7.04	41212.6	1.93881		1.93881	-4.61774	-7.17635
2012-10-30 15:09:39	4.52	7.05	41212.6	1.94575		1.94575	-4.60754	-7.18654
2012-10-30 15:19:39	4.54	7.07	41212.6	1.9527		1.9527	-4.62793	-7.20693
2012-10-30 15:29:39	4.51	7.04	41212.6	1.95964	41212.6	1.95964	-4.59735	-7.17635
2012-10-30 15:39:39	4.51	7.04	41212.7	1.96659		1.96659	-4.59735	-7.17635
2012-10-30 15:49:39	4.53	7.05	41212.7	1.97353		1.97353	-4.61774	-7.18654
2012-10-30 15:59:39	4.55	7.08	41212.7	1.98047		1.98047	-4.63812	-7.21713
2012-10-30 16:09:39	4.57	7.09	41212.7	1.98742		1.98742	-4.65851	-7.22732
2012-10-30 16:19:39	4.59	7.11	41212.7	1.99436		1.99436	-4.6789	-7.24771
2012-10-30 16:29:39	4.62	7.14	41212.7	2.00131	41212.7	2.00131	-4.70948	-7.27829
2012-10-30 16:39:39	4.6	7.11	41212.7	2.00825		2.00825	-4.68909	-7.24771
2012-10-30 16:49:39	4.63	7.15	41212.7	2.0152		2.0152	-4.71967	-7.28848
2012-10-30 16:59:39	4.66	7.17	41212.7	2.02214		2.02214	-4.75025	-7.30887
2012-10-30 17:09:39	4.5	7.02	41212.7	2.02909		2.02909	-4.58716	-7.15596
2012-10-30 17:19:39	4.55	7.07	41212.7	2.03603		2.03603	-4.63812	-7.20693
2012-10-30 17:29:39	4.62	7.13	41212.7	2.04297	41212.7	2.04297	-4.70948	-7.26809
2012-10-30 17:39:39	4.66	7.18	41212.7	2.04992		2.04992	-4.75025	-7.31906
2012-10-30 17:49:39	4.69	7.21	41212.7	2.05686		2.05686	-4.78084	-7.34964
2012-10-30 17:59:39	4.72	7.25	41212.7	2.06381		2.06381	-4.81142	-7.39042
2012-10-30 18:09:39	4.76	7.28	41212.8	2.07075		2.07075	-4.85219	-7.421
2012-10-30 18:19:39	4.79	7.3	41212.8	2.0777		2.0777	-4.88277	-7.44139
2012-10-30 18:29:39	4.78	7.31	41212.8	2.08464	41212.8	2.08464	-4.87258	-7.45158
2012-10-30 18:39:39	4.83	7.35	41212.8	2.09159		2.09159	-4.92355	-7.49235
2012-10-30 18:49:39	4.86	7.37	41212.8	2.09853		2.09853	-4.95413	-7.51274
2012-10-30 18:59:39	4.87	7.39	41212.8	2.10547		2.10547	-4.96432	-7.53313
2012-10-30 19:09:39	4.91	7.42	41212.8	2.11242		2.11242	-5.0051	-7.56371
2012-10-30 19:19:39	4.94	7.46	41212.8	2.11936		2.11936	-5.03568	-7.60449
2012-10-30 19:29:39	4.96	7.49	41212.8	2.12631	41212.8	2.12631	-5.05607	-7.63507
2012-10-30 19:39:39	4.88	7.41	41212.8	2.13325		2.13325	-4.97452	-7.55352
2012-10-30 19:49:39	4.96	7.48	41212.8	2.1402		2.1402	-5.05607	-7.62487
2012-10-30 19:59:39	5	7.52	41212.8	2.14714		2.14714	-5.09684	-7.66565
2012-10-30 20:09:39	5	7.54	41212.8	2.15409		2.15409	-5.09684	-7.68603
2012-10-30 20:19:39	5.05	7.58	41212.8	2.16103		2.16103	-5.14781	-7.72681
2012-10-30 20:29:39	5.08	7.61	41212.9	2.16797	41212.9	2.16797	-5.17839	-7.75739
2012-10-30 20:39:39	4.66	7.19	41212.9	2.17492		2.17492	-4.75025	-7.32926
2012-10-30 20:49:39	4.72	7.24	41212.9	2.18186		2.18186	-4.81142	-7.38022
2012-10-30 20:59:39	4.77	7.29	41212.9	2.18881		2.18881	-4.86239	-7.43119
2012-10-30 21:09:39	4.85	7.35	41212.9	2.19575		2.19575	-4.94393	-7.49235
2012-10-30 21:19:39	4.89	7.41	41212.9	2.2027		2.2027	-4.98471	-7.55352
2012-10-30 21:29:39	4.97	7.48	41212.9	2.20964	41212.9	2.20964	-5.06626	-7.62487
2012-10-30 21:39:39	5.01	7.54	41212.9	2.21659		2.21659	-5.10703	-7.68603
2012-10-30 21:49:39	5.07	7.59	41212.9	2.22353		2.22353	-5.1682	-7.737
2012-10-30 21:59:39	5.11	7.63	41212.9	2.23047		2.23047	-5.20897	-7.77778
2012-10-30 22:09:39	5.14	7.68	41212.9	2.23742		2.23742	-5.23955	-7.82875
2012-10-30 22:19:39	5.19	7.69	41212.9	2.24436		2.24436	-5.29052	-7.83894
2012-10-30 22:29:39	5.2	7.71	41212.9	2.25131	41212.9	2.25131	-5.30071	-7.85933
2012-10-30 22:39:39	4.92	7.45	41212.9	2.25825		2.25825	-5.01529	-7.59429
2012-10-30 22:49:39	4.99	7.52	41213	2.2652		2.2652	-5.08665	-7.66565
2012-10-30 22:59:39	5.05	7.57	41213	2.27214		2.27214	-5.14781	-7.71662
2012-10-30 23:09:39	5.12	7.62	41213	2.27909		2.27909	-5.21916	-7.76758
2012-10-30 23:19:39	5.16	7.69	41213	2.28603		2.28603	-5.25994	-7.83894
2012-10-30 23:29:39	5.19	7.71	41213	2.29297	41213	2.29297	-5.29052	-7.85933
2012-10-30 23:39:39	5.21	7.74	41213	2.29992		2.29992	-5.31091	-7.88991
2012-10-30 23:49:39	5.25	7.78	41213	2.30686		2.30686	-5.35168	-7.93068
2012-10-30 23:59:39	5.23	7.77	41213	2.31381		2.31381	-5.33129	-7.92049
2012-10-31 00:09:39	5.27	7.8	41213	2.32075		2.32075	-5.37207	-7.95107
2012-10-31 00:19:39	5.27	7.8	41213	2.3277		2.3277	-5.37207	-7.95107
2012-10-31 00:29:39	5.3	7.82	41213	2.33464	41213	2.33464	-5.40265	-7.97146
2012-10-31 00:39:39	5.34	7.87	41213	2.34159		2.34159	-5.44343	-8.02243
2012-10-31 00:49:39	5.22	7.75	41213	2.34853		2.34853	-5.3211	-7.9001
2012-10-31 00:59:39	5.27	7.79	41213	2.35547		2.35547	-5.37207	-7.94088
2012-10-31 01:09:39	5.32	7.84	41213	2.36242		2.36242	-5.42304	-7.99185
2012-10-31 01:19:39	5.3	7.84	41213.1	2.36936		2.36936	-5.40265	-7.99185
2012-10-31 01:29:39	5.34	7.88	41213.1	2.37631	41213.1	2.37631	-5.44343	-8.03262
2012-10-31 01:39:39	5.35	7.89	41213.1	2.38325		2.38325	-5.45362	-8.04281
2012-10-31 01:49:39	5.38	7.91	41213.1	2.3902		2.3902	-5.4842	-8.0632
2012-10-31 01:59:39	5.38	7.92	41213.1	2.39714		2.39714	-5.4842	-8.07339
2012-10-31 02:09:39	5.41	7.94	41213.1	2.40409		2.40409	-5.51478	-8.09378
2012-10-31 02:19:39	5.42	7.96	41213.1	2.41103		2.41103	-5.52497	-8.11417
2012-10-31 02:29:39	5.44	7.97	41213.1	2.41797	41213.1	2.41797	-5.54536	-8.12436
2012-10-31 02:39:39	5.45	7.99	41213.1	2.42492		2.42492	-5.55556	-8.14475
2012-10-31 02:49:39	5.48	8.01	41213.1	2.43186		2.43186	-5.58614	-8.16514
2012-10-31 02:59:39	5.5	8.03	41213.1	2.43881		2.43881	-5.60652	-8.18552
2012-10-31 03:09:39	5.52	8.05	41213.1	2.44575		2.44575	-5.62691	-8.20591
2012-10-31 03:19:39	5.53	8.05	41213.1	2.4527		2.4527	-5.6371	-8.20591
2012-10-31 03:29:39	5.55	8.08	41213.1	2.45964	41213.1	2.45964	-5.65749	-8.23649
2012-10-31 03:39:39	5.56	8.1	41213.2	2.46659		2.46659	-5.66769	-8.25688
2012-10-31 03:49:39	5.58	8.12	41213.2	2.47353		2.47353	-5.68807	-8.27727
2012-10-31 03:59:39	5.51	8.05	41213.2	2.48047		2.48047	-5.61672	-8.20591
2012-10-31 04:09:39	5.57	8.1	41213.2	2.48742		2.48742	-5.67788	-8.25688
2012-10-31 04:19:39	5.58	8.12	41213.2	2.49436		2.49436	-5.68807	-8.27727
2012-10-31 04:29:39	5.59	8.13	41213.2	2.50131	41213.2	2.50131	-5.69827	-8.28746
2012-10-31 04:39:39	5.6	8.14	41213.2	2.50825		2.50825	-5.70846	-8.29766
2012-10-31 04:49:39	5.62	8.16	41213.2	2.5152		2.5152	-5.72885	-8.31804
2012-10-31 04:59:39	5.64	8.17	41213.2	2.52214		2.52214	-5.74924	-8.32824
2012-10-31 05:09:39	5.66	8.2	41213.2	2.52909		2.52909	-5.76962	-8.35882
2012-10-31 05:19:39	5.68	8.22	41213.2	2.53603		2.53603	-5.79001	-8.3792
2012-10-31 05:29:39	5.71	8.25	41213.2	2.54297	41213.2	2.54297	-5.82059	-8.40979
2012-10-31 05:39:39	5.74	8.27	41213.2	2.54992		2.54992	-5.85117	-8.43017
2012-10-31 05:49:39	5.7	8.24	41213.2	2.55686		2.55686	-5.8104	-8.39959
2012-10-31 05:59:39	5.74	8.28	41213.2	2.56381		2.56381	-5.85117	-8.44037
2012-10-31 06:09:39	5.75	8.29	41213.3	2.57075		2.57075	-5.86137	-8.45056
2012-10-31 06:19:39	5.61	8.15	41213.3	2.5777		2.5777	-5.71865	-8.30785
2012-10-31 06:29:39	5.66	8.2	41213.3	2.58464	41213.3	2.58464	-5.76962	-8.35882
2012-10-31 06:39:39	5.59	8.13	41213.3	2.59159		2.59159	-5.69827	-8.28746
2012-10-31 06:49:39	5.65	8.19	41213.3	2.59853		2.59853	-5.75943	-8.34862
2012-10-31 06:59:39	5.71	8.24	41213.3	2.60547		2.60547	-5.82059	-8.39959
2012-10-31 07:09:39	5.75	8.29	41213.3	2.61242		2.61242	-5.86137	-8.45056
2012-10-31 07:19:39	5.78	8.32	41213.3	2.61936		2.61936	-5.89195	-8.48114
2012-10-31 07:29:39	5.8	8.34	41213.3	2.62631	41213.3	2.62631	-5.91233	-8.50153
2012-10-31 07:39:39	5.8	8.34	41213.3	2.63325		2.63325	-5.91233	-8.50153
2012-10-31 07:49:39	5.83	8.37	41213.3	2.6402		2.6402	-5.94292	-8.53211
2012-10-31 07:59:39	5.78	8.32	41213.3	2.64714		2.64714	-5.89195	-8.48114
2012-10-31 08:09:39	5.77	8.3	41213.3	2.65409		2.65409	-5.88175	-8.46075
2012-10-31 08:19:39	5.79	8.32	41213.3	2.66103		2.66103	-5.90214	-8.48114
2012-10-31 08:29:39	5.81	8.35	41213.4	2.66797	41213.4	2.66797	-5.92253	-8.51172
2012-10-31 08:39:39	5.83	8.37	41213.4	2.67492		2.67492	-5.94292	-8.53211
2012-10-31 08:49:39	5.74	8.29	41213.4	2.68186		2.68186	-5.85117	-8.45056
2012-10-31 08:59:39	5.75	8.3	41213.4	2.68881		2.68881	-5.86137	-8.46075
2012-10-31 09:09:39	5.79	8.34	41213.4	2.69575		2.69575	-5.90214	-8.50153
2012-10-31 09:19:39	5.83	8.37	41213.4	2.7027		2.7027	-5.94292	-8.53211
2012-10-31 09:29:39	5.84	8.39	41213.4	2.70964	41213.4	2.70964	-5.95311	-8.5525
2012-10-31 09:39:39	5.83	8.37	41213.4	2.71659		2.71659	-5.94292	-8.53211
2012-10-31 09:49:39	5.87	8.41	41213.4	2.72353		2.72353	-5.98369	-8.57288
2012-10-31 09:59:39	5.92	8.46	41213.4	2.73047		2.73047	-6.03466	-8.62385
2012-10-31 10:09:39	5.91	8.44	41213.4	2.73742		2.73742	-6.02446	-8.60347
2012-10-31 10:19:39	5.91	8.44	41213.4	2.74436		2.74436	-6.02446	-8.60347
2012-10-31 10:29:39	5.91	8.45	41213.4	2.75131	41213.4	2.75131	-6.02446	-8.61366
2012-10-31 10:39:39	5.94	8.48	41213.4	2.75825		2.75825	-6.05505	-8.64424
2012-10-31 10:49:39	5.96	8.5	41213.5	2.7652		2.7652	-6.07543	-8.66463
2012-10-31 10:59:39	5.97	8.51	41213.5	2.77214		2.77214	-6.08563	-8.67482
2012-10-31 11:09:39	5.98	8.52	41213.5	2.77909		2.77909	-6.09582	-8.68502
2012-10-31 11:19:39	5.56	7.92	41213.5	2.78603		2.78603	-5.66769	-8.07339
2012-10-31 11:29:39	5.1	7.62	41213.5	2.79297	41213.5	2.79297	-5.19878	-7.76758
2012-10-31 11:39:39	5.08	7.63	41213.5	2.79992		2.79992	-5.17839	-7.77778
2012-10-31 11:49:39	5.06	7.62	41213.5	2.80686		2.80686	-5.158	-7.76758
2012-10-31 11:59:39	5.11	7.65	41213.5	2.81381		2.81381	-5.20897	-7.79817
2012-10-31 12:09:39	5.13	7.68	41213.5	2.82075		2.82075	-5.22936	-7.82875
2012-10-31 12:19:39	5.16	7.71	41213.5	2.8277		2.8277	-5.25994	-7.85933
2012-10-31 12:29:39	5.19	7.74	41213.5	2.83464	41213.5	2.83464	-5.29052	-7.88991
2012-10-31 12:39:39	5.23	7.77	41213.5	2.84159		2.84159	-5.33129	-7.92049
2012-10-31 12:49:39	5.28	7.81	41213.5	2.84853		2.84853	-5.38226	-7.96126
2012-10-31 12:59:39	5.31	7.82	41213.5	2.85547		2.85547	-5.41284	-7.97146
2012-10-31 13:09:39	5.34	7.88	41213.5	2.86242		2.86242	-5.44343	-8.03262
2012-10-31 13:19:39	5.36	7.9	41213.6	2.86936		2.86936	-5.46381	-8.05301
2012-10-31 13:29:39	5.39	7.93	41213.6	2.87631	41213.6	2.87631	-5.49439	-8.08359
2012-10-31 13:39:39	5.42	7.95	41213.6	2.88325		2.88325	-5.52497	-8.10398
2012-10-31 13:49:39	5.45	7.98	41213.6	2.8902		2.8902	-5.55556	-8.13456
2012-10-31 13:59:39	5.48	8.02	41213.6	2.89714		2.89714	-5.58614	-8.17533
2012-10-31 14:09:39	5.52	8.06	41213.6	2.90409		2.90409	-5.62691	-8.21611
2012-10-31 14:19:39	5.51	8.05	41213.6	2.91103		2.91103	-5.61672	-8.20591
2012-10-31 14:29:39	5.52	8.06	41213.6	2.91797	41213.6	2.91797	-5.62691	-8.21611
2012-10-31 14:39:39	5.54	8.08	41213.6	2.92492		2.92492	-5.6473	-8.23649
2012-10-31 14:49:39	5.56	8.1	41213.6	2.93186		2.93186	-5.66769	-8.25688
2012-10-31 14:59:39	5.6	8.13	41213.6	2.93881		2.93881	-5.70846	-8.28746
2012-10-31 15:09:39	5.62	8.15	41213.6	2.94575		2.94575	-5.72885	-8.30785
2012-10-31 15:19:39	5.66	8.17	41213.6	2.9527		2.9527	-5.76962	-8.32824
2012-10-31 15:29:39	5.69	8.21	41213.6	2.95964	41213.6	2.95964	-5.8002	-8.36901
2012-10-31 15:39:39	5.71	8.23	41213.7	2.96659		2.96659	-5.82059	-8.3894
2012-10-31 15:49:39	5.74	8.26	41213.7	2.97353		2.97353	-5.85117	-8.41998
2012-10-31 15:59:39	5.79	8.28	41213.7	2.98047		2.98047	-5.90214	-8.44037
2012-10-31 16:09:39	5.79	8.31	41213.7	2.98742		2.98742	-5.90214	-8.47095
2012-10-31 16:19:39	5.81	8.33	41213.7	2.99436		2.99436	-5.92253	-8.49134
2012-10-31 16:29:39	5.85	8.35	41213.7	3.00131	41213.7	3.00131	-5.9633	-8.51172
2012-10-31 16:39:39	5.87	8.39	41213.7	3.00825		3.00825	-5.98369	-8.5525
2012-10-31 16:49:39	5.89	8.4	41213.7	3.0152		3.0152	-6.00408	-8.56269
2012-10-31 16:59:39	5.92	8.42	41213.7	3.02214		3.02214	-6.03466	-8.58308
2012-10-31 17:09:39	5.73	8.26	41213.7	3.02909		3.02909	-5.84098	-8.41998
2012-10-31 17:19:39	5.78	8.31	41213.7	3.03603		3.03603	-5.89195	-8.47095
2012-10-31 17:29:39	5.84	8.39	41213.7	3.04297	41213.7	3.04297	-5.95311	-8.5525
2012-10-31 17:39:39	5.89	8.44	41213.7	3.04992		3.04992	-6.00408	-8.60347
2012-10-31 17:49:39	5.95	8.49	41213.7	3.05686		3.05686	-6.06524	-8.65443
2012-10-31 17:59:39	5.99	8.53	41213.7	3.06381		3.06381	-6.10601	-8.69521
2012-10-31 18:09:39	6.04	8.58	41213.8	3.07075		3.07075	-6.15698	-8.74618
2012-10-31 18:19:39	6.05	8.59	41213.8	3.0777		3.0777	-6.16718	-8.75637
2012-10-31 18:29:39	6.09	8.64	41213.8	3.08464	41213.8	3.08464	-6.20795	-8.80734
2012-10-31 18:39:39	6.14	8.68	41213.8	3.09159		3.09159	-6.25892	-8.84811
2012-10-31 18:49:39	6.17	8.71	41213.8	3.09853		3.09853	-6.2895	-8.8787
2012-10-31 18:59:39	6.19	8.74	41213.8	3.10547		3.10547	-6.30989	-8.90928
2012-10-31 19:09:39	6.15	8.69	41213.8	3.11242		3.11242	-6.26911	-8.85831
2012-10-31 19:19:39	6.21	8.75	41213.8	3.11936		3.11936	-6.33028	-8.91947
2012-10-31 19:29:39	6.26	8.8	41213.8	3.12631	41213.8	3.12631	-6.38124	-8.97044
2012-10-31 19:39:39	6.29	8.82	41213.8	3.13325		3.13325	-6.41182	-8.99083
2012-10-31 19:49:39	6.31	8.86	41213.8	3.1402		3.1402	-6.43221	-9.0316
2012-10-31 19:59:39	6.36	8.9	41213.8	3.14714		3.14714	-6.48318	-9.07238
2012-10-31 20:09:39	6.36	8.91	41213.8	3.15409		3.15409	-6.48318	-9.08257
2012-10-31 20:19:39	6.41	8.95	41213.8	3.16103		3.16103	-6.53415	-9.12334
2012-10-31 20:29:39	6.43	8.97	41213.9	3.16797	41213.9	3.16797	-6.55454	-9.14373
2012-10-31 20:39:39	6.45	9	41213.9	3.17492		3.17492	-6.57492	-9.17431
2012-10-31 20:49:39	6.45	9	41213.9	3.18186		3.18186	-6.57492	-9.17431
2012-10-31 20:59:39	6.5	9.05	41213.9	3.18881		3.18881	-6.62589	-9.22528
2012-10-31 21:09:39	6.53	9.08	41213.9	3.19575		3.19575	-6.65647	-9.25586
2012-10-31 21:19:39	6.58	9.13	41213.9	3.2027		3.2027	-6.70744	-9.30683
2012-10-31 21:29:39	6.59	9.14	41213.9	3.20964	41213.9	3.20964	-6.71764	-9.31702
2012-10-31 21:39:39	6.62	9.17	41213.9	3.21659		3.21659	-6.74822	-9.3476
2012-10-31 21:49:39	6.65	9.2	41213.9	3.22353		3.22353	-6.7788	-9.37819
2012-10-31 21:59:39	6.68	9.23	41213.9	3.23047		3.23047	-6.80938	-9.40877
2012-10-31 22:09:39	6.7	9.26	41213.9	3.23742		3.23742	-6.82977	-9.43935
2012-10-31 22:19:39	6.73	9.28	41213.9	3.24436		3.24436	-6.86035	-9.45973
2012-10-31 22:29:39	6.77	9.32	41213.9	3.25131	41213.9	3.25131	-6.90112	-9.50051
2012-10-31 22:39:39	6.79	9.35	41213.9	3.25825		3.25825	-6.92151	-9.53109
2012-10-31 22:49:39	6.81	9.37	41214	3.2652		3.2652	-6.9419	-9.55148
2012-10-31 22:59:39	6.84	9.4	41214	3.27214		3.27214	-6.97248	-9.58206
2012-10-31 23:09:39	6.87	9.43	41214	3.27909		3.27909	-7.00306	-9.61264
2012-10-31 23:19:39	6.89	9.44	41214	3.28603		3.28603	-7.02345	-9.62283
2012-10-31 23:29:39	6.91	9.48	41214	3.29297	41214	3.29297	-7.04383	-9.66361
2012-10-31 23:39:39	6.93	9.49	41214	3.29992		3.29992	-7.06422	-9.6738
2012-10-31 23:49:39	6.95	9.5	41214	3.30686		3.30686	-7.08461	-9.684
2012-10-31 23:59:39	6.99	9.55	41214	3.31381		3.31381	-7.12538	-9.73496
2012-11-01 00:09:39	7.02	9.56	41214	3.32075		3.32075	-7.15596	-9.74516
2012-11-01 00:19:39	7.04	9.59	41214	3.3277		3.3277	-7.17635	-9.77574
2012-11-01 00:29:39	7.07	9.61	41214	3.33464	41214	3.33464	-7.20693	-9.79613
2012-11-01 00:39:39	7.09	9.66	41214	3.34159		3.34159	-7.22732	-9.84709
2012-11-01 00:49:39	7.12	9.68	41214	3.34853		3.34853	-7.2579	-9.86748
2012-11-01 00:59:39	7.16	9.72	41214	3.35547		3.35547	-7.29867	-9.90826
2012-11-01 01:09:39	7.17	9.73	41214	3.36242		3.36242	-7.30887	-9.91845
2012-11-01 01:19:39	7.01	9.59	41214.1	3.36936		3.36936	-7.14577	-9.77574
2012-11-01 01:29:39	7.11	9.68	41214.1	3.37631	41214.1	3.37631	-7.24771	-9.86748
2012-11-01 01:39:39	7.17	9.74	41214.1	3.38325		3.38325	-7.30887	-9.92864
2012-11-01 01:49:39	7.19	9.75	41214.1	3.3902		3.3902	-7.32926	-9.93884
2012-11-01 01:59:39	7.23	9.76	41214.1	3.39714		3.39714	-7.37003	-9.94903
2012-11-01 02:09:39	7.25	9.81	41214.1	3.40409		3.40409	-7.39042	-10
2012-11-01 02:19:39	7.27	9.84	41214.1	3.41103		3.41103	-7.41081	-10.0306
2012-11-01 02:29:39	7.29	9.85	41214.1	3.41797	41214.1	3.41797	-7.43119	-10.0408
2012-11-01 02:39:39	7.32	9.85	41214.1	3.42492		3.42492	-7.46177	-10.0408
2012-11-01 02:49:39	7.33	9.89	41214.1	3.43186		3.43186	-7.47197	-10.0815
2012-11-01 02:59:39	7.32	9.88	41214.1	3.43881		3.43881	-7.46177	-10.0714
2012-11-01 03:09:39	7.33	9.87	41214.1	3.44575		3.44575	-7.47197	-10.0612
2012-11-01 03:19:39	7.33	9.9	41214.1	3.4527		3.4527	-7.47197	-10.0917
2012-11-01 03:29:39	7.33	9.89	41214.1	3.45964	41214.1	3.45964	-7.47197	-10.0815
2012-11-01 03:39:39	7.33	9.88	41214.2	3.46659		3.46659	-7.47197	-10.0714
2012-11-01 03:49:39	7.29	9.85	41214.2	3.47353		3.47353	-7.43119	-10.0408
2012-11-01 03:59:39	7.33	9.9	41214.2	3.48047		3.48047	-7.47197	-10.0917
2012-11-01 04:09:39	7.39	9.95	41214.2	3.48742		3.48742	-7.53313	-10.1427
2012-11-01 04:19:39	7.42	9.98	41214.2	3.49436		3.49436	-7.56371	-10.1733
2012-11-01 04:29:39	7.44	10	41214.2	3.50131	41214.2	3.50131	-7.5841	-10.1937
2012-11-01 04:39:39	7.46	10.02	41214.2	3.50825		3.50825	-7.60449	-10.2141
2012-11-01 04:49:39	7.48	10.05	41214.2	3.5152		3.5152	-7.62487	-10.2446
2012-11-01 04:59:39	7.5	10.06	41214.2	3.52214		3.52214	-7.64526	-10.2548
2012-11-01 05:09:39	7.51	10.08	41214.2	3.52909		3.52909	-7.65545	-10.2752
2012-11-01 05:19:39	7.56	10.12	41214.2	3.53603		3.53603	-7.70642	-10.316
2012-11-01 05:29:39	7.58	10.15	41214.2	3.54297	41214.2	3.54297	-7.72681	-10.3466
2012-11-01 05:39:39	7.61	10.18	41214.2	3.54992		3.54992	-7.75739	-10.3772
2012-11-01 05:49:39	7.64	10.21	41214.2	3.55686		3.55686	-7.78797	-10.4077
2012-11-01 05:59:39	7.67	10.24	41214.2	3.56381		3.56381	-7.81855	-10.4383
2012-11-01 06:09:39	7.67	10.24	41214.3	3.57075		3.57075	-7.81855	-10.4383
2012-11-01 06:19:39	7.7	10.26	41214.3	3.5777		3.5777	-7.84913	-10.4587
2012-11-01 06:29:39	7.73	10.29	41214.3	3.58464	41214.3	3.58464	-7.87971	-10.4893
2012-11-01 06:39:39	7.75	10.33	41214.3	3.59159		3.59159	-7.9001	-10.5301
2012-11-01 06:49:39	7.79	10.35	41214.3	3.59853		3.59853	-7.94088	-10.5505
2012-11-01 06:59:39	7.79	10.36	41214.3	3.60547		3.60547	-7.94088	-10.5607
2012-11-01 07:09:39	7.82	10.39	41214.3	3.61242		3.61242	-7.97146	-10.5912
2012-11-01 07:19:39	7.86	10.43	41214.3	3.61936		3.61936	-8.01223	-10.632
2012-11-01 07:29:39	7.88	10.45	41214.3	3.62631	41214.3	3.62631	-8.03262	-10.6524
2012-11-01 07:39:39	7.9	10.47	41214.3	3.63325		3.63325	-8.05301	-10.6728
2012-11-01 07:49:39	7.93	10.49	41214.3	3.6402		3.6402	-8.08359	-10.6932
2012-11-01 07:59:39	7.9	10.44	41214.3	3.64714		3.64714	-8.05301	-10.6422
2012-11-01 08:09:39	7.85	10.43	41214.3	3.65409		3.65409	-8.00204	-10.632
2012-11-01 08:19:39	7.84	10.4	41214.3	3.66103		3.66103	-7.99185	-10.6014
2012-11-01 08:29:39	7.87	10.45	41214.4	3.66797	41214.4	3.66797	-8.02243	-10.6524
2012-11-01 08:39:39	7.92	10.49	41214.4	3.67492		3.67492	-8.07339	-10.6932
2012-11-01 08:49:39	7.55	10.05	41214.4	3.68186		3.68186	-7.69623	-10.2446
2012-11-01 08:59:39	7.38	9.92	41214.4	3.68881		3.68881	-7.52294	-10.1121
2012-11-01 09:09:39	7.43	9.97	41214.4	3.69575		3.69575	-7.5739	-10.1631
2012-11-01 09:19:39	7.5	10.03	41214.4	3.7027		3.7027	-7.64526	-10.2243
2012-11-01 09:29:39	7.49	10.02	41214.4	3.70964	41214.4	3.70964	-7.63507	-10.2141
2012-11-01 09:39:39	7.57	10.1	41214.4	3.71659		3.71659	-7.71662	-10.2956
2012-11-01 09:49:39	7.66	10.18	41214.4	3.72353		3.72353	-7.80836	-10.3772
2012-11-01 09:59:39	7.71	10.24	41214.4	3.73047		3.73047	-7.85933	-10.4383
2012-11-01 10:09:39	7.78	10.31	41214.4	3.73742		3.73742	-7.93068	-10.5097
2012-11-01 10:19:39	7.84	10.38	41214.4	3.74436		3.74436	-7.99185	-10.581
2012-11-01 10:29:39	7.68	10.23	41214.4	3.75131	41214.4	3.75131	-7.82875	-10.4281
2012-11-01 10:39:39	7.66	10.21	41214.4	3.75825		3.75825	-7.80836	-10.4077
2012-11-01 10:49:39	7.73	10.26	41214.5	3.7652		3.7652	-7.87971	-10.4587
2012-11-01 10:59:39	7.8	10.3	41214.5	3.77214		3.77214	-7.95107	-10.4995
2012-11-01 11:09:39	7.84	10.34	41214.5	3.77909		3.77909	-7.99185	-10.5403
2012-11-01 11:19:39	7.87	10.4	41214.5	3.78603		3.78603	-8.02243	-10.6014
2012-11-01 11:29:39	7.92	10.44	41214.5	3.79297	41214.5	3.79297	-8.07339	-10.6422
2012-11-01 11:39:39	7.98	10.49	41214.5	3.79992		3.79992	-8.13456	-10.6932
2012-11-01 11:49:39	8.01	10.54	41214.5	3.80686		3.80686	-8.16514	-10.7441
2012-11-01 11:59:39	8	10.53	41214.5	3.81381		3.81381	-8.15494	-10.7339
2012-11-01 12:09:39	8.08	10.61	41214.5	3.82075		3.82075	-8.23649	-10.8155
2012-11-01 12:19:39	8.1	10.63	41214.5	3.8277		3.8277	-8.25688	-10.8359
2012-11-01 12:29:39	8.15	10.68	41214.5	3.83464	41214.5	3.83464	-8.30785	-10.8869
2012-11-01 12:39:39	8.17	10.7	41214.5	3.84159		3.84159	-8.32824	-10.9072
2012-11-01 12:49:39	8.21	10.74	41214.5	3.84853		3.84853	-8.36901	-10.948
2012-11-01 12:59:39	8.25	10.75	41214.5	3.85547		3.85547	-8.40979	-10.9582
2012-11-01 13:09:39	8.27	10.78	41214.5	3.86242		3.86242	-8.43017	-10.9888
2012-11-01 13:19:39	8.31	10.84	41214.6	3.86936		3.86936	-8.47095	-11.0499
2012-11-01 13:29:39	8.34	10.87	41214.6	3.87631	41214.6	3.87631	-8.50153	-11.0805
2012-11-01 13:39:39	8.41	10.93	41214.6	3.88325		3.88325	-8.57288	-11.1417
2012-11-01 13:49:39	8.43	10.96	41214.6	3.8902		3.8902	-8.59327	-11.1723
2012-11-01 13:59:39	8.47	10.99	41214.6	3.89714		3.89714	-8.63405	-11.2029
2012-11-01 14:09:39	8.52	11.02	41214.6	3.90409		3.90409	-8.68502	-11.2334
2012-11-01 14:19:39	8.57	11.09	41214.6	3.91103		3.91103	-8.73598	-11.3048
2012-11-01 14:29:39	8.58	11.11	41214.6	3.91797	41214.6	3.91797	-8.74618	-11.3252
2012-11-01 14:39:39	8.63	11.15	41214.6	3.92492		3.92492	-8.79715	-11.366
2012-11-01 14:49:39	8.63	11.19	41214.6	3.93186		3.93186	-8.79715	-11.4067
2012-11-01 14:59:39	8.69	11.22	41214.6	3.93881		3.93881	-8.85831	-11.4373
2012-11-01 15:09:39	8.72	11.23	41214.6	3.94575		3.94575	-8.88889	-11.4475
2012-11-01 15:19:39	8.77	11.3	41214.6	3.9527		3.9527	-8.93986	-11.5189
2012-11-01 15:29:39	8.79	11.32	41214.6	3.95964	41214.6	3.95964	-8.96024	-11.5392
2012-11-01 15:39:39	8.84	11.35	41214.7	3.96659		3.96659	-9.01121	-11.5698
2012-11-01 15:49:39	8.86	11.4	41214.7	3.97353		3.97353	-9.0316	-11.6208
2012-11-01 15:59:39	8.91	11.44	41214.7	3.98047		3.98047	-9.08257	-11.6616
2012-11-01 16:09:39	8.94	11.47	41214.7	3.98742		3.98742	-9.11315	-11.6922
2012-11-01 16:19:39	8.98	11.51	41214.7	3.99436		3.99436	-9.15392	-11.7329
2012-11-01 16:29:39	9.01	11.52	41214.7	4.00131	41214.7	4.00131	-9.18451	-11.7431
2012-11-01 16:39:39	9.04	11.56	41214.7	4.00825		4.00825	-9.21509	-11.7839
2012-11-01 16:49:39	9.08	11.62	41214.7	4.0152		4.0152	-9.25586	-11.8451
2012-11-01 16:59:39	9.12	11.66	41214.7	4.02214		4.02214	-9.29664	-11.8858
2012-11-01 17:09:39	9.14	11.69	41214.7	4.02909		4.02909	-9.31702	-11.9164
2012-11-01 17:19:39	9.2	11.6	41214.7	4.03603		4.03603	-9.37819	-11.8247
2012-11-01 17:29:39	8.92	11.48	41214.7	4.04297	41214.7	4.04297	-9.09276	-11.7023
2012-11-01 17:39:39	9	11.56	41214.7	4.04992		4.04992	-9.17431	-11.7839
2012-11-01 17:49:39	9.05	11.6	41214.7	4.05686		4.05686	-9.22528	-11.8247
2012-11-01 17:59:39	9.08	11.63	41214.7	4.06381		4.06381	-9.25586	-11.8552
2012-11-01 18:09:39	9.11	11.66	41214.8	4.07075		4.07075	-9.28644	-11.8858
2012-11-01 18:19:39	9.14	11.69	41214.8	4.0777		4.0777	-9.31702	-11.9164
2012-11-01 18:29:39	9.19	11.74	41214.8	4.08464	41214.8	4.08464	-9.36799	-11.9674
2012-11-01 18:39:39	9.23	11.77	41214.8	4.09159		4.09159	-9.40877	-11.998
2012-11-01 18:49:39	9.28	11.82	41214.8	4.09853		4.09853	-9.45973	-12.0489
2012-11-01 18:59:39	9.32	11.86	41214.8	4.10547		4.10547	-9.50051	-12.0897
2012-11-01 19:09:39	9.37	11.91	41214.8	4.11242		4.11242	-9.55148	-12.1407
2012-11-01 19:19:39	9.41	11.95	41214.8	4.11936		4.11936	-9.59225	-12.1814
2012-11-01 19:29:39	9.44	11.99	41214.8	4.12631	41214.8	4.12631	-9.62283	-12.2222
2012-11-01 19:39:39	9.43	11.97	41214.8	4.13325		4.13325	-9.61264	-12.2018
2012-11-01 19:49:39	9.49	12.04	41214.8	4.1402		4.1402	-9.6738	-12.2732
2012-11-01 19:59:39	9.52	12.06	41214.8	4.14714		4.14714	-9.70438	-12.2936
2012-11-01 20:09:39	9.59	12.13	41214.8	4.15409		4.15409	-9.77574	-12.3649
2012-11-01 20:19:39	9.64	12.18	41214.8	4.16103		4.16103	-9.82671	-12.4159
2012-11-01 20:29:39	9.69	12.24	41214.9	4.16797	41214.9	4.16797	-9.87768	-12.4771
2012-11-01 20:39:39	9.72	12.27	41214.9	4.17492		4.17492	-9.90826	-12.5076
2012-11-01 20:49:39	9.79	12.33	41214.9	4.18186		4.18186	-9.97961	-12.5688
2012-11-01 20:59:39	9.85	12.4	41214.9	4.18881		4.18881	-10.0408	-12.6402
2012-11-01 21:09:39	9.83	12.46	41214.9	4.19575		4.19575	-10.0204	-12.7013
2012-11-01 21:19:39	9.95	12.49	41214.9	4.2027		4.2027	-10.1427	-12.7319
2012-11-01 21:29:39	10	12.54	41214.9	4.20964	41214.9	4.20964	-10.1937	-12.7829
2012-11-01 21:39:39	10.04	12.59	41214.9	4.21659		4.21659	-10.2345	-12.8338
2012-11-01 21:49:39	10.08	12.63	41214.9	4.22353		4.22353	-10.2752	-12.8746
2012-11-01 21:59:39	10.13	12.66	41214.9	4.23047		4.23047	-10.3262	-12.9052
2012-11-01 22:09:39	10.17	12.73	41214.9	4.23742		4.23742	-10.367	-12.9766
2012-11-01 22:19:39	10.24	12.77	41214.9	4.24436		4.24436	-10.4383	-13.0173
2012-11-01 22:29:39	10.32	12.84	41214.9	4.25131	41214.9	4.25131	-10.5199	-13.0887
2012-11-01 22:39:39	10.34	12.89	41214.9	4.25825		4.25825	-10.5403	-13.1397
2012-11-01 22:49:39	10.39	12.92	41215	4.2652		4.2652	-10.5912	-13.1702
2012-11-01 22:59:39	10.44	12.99	41215	4.27214		4.27214	-10.6422	-13.2416
2012-11-01 23:09:39	10.49	13.04	41215	4.27909		4.27909	-10.6932	-13.2926
2012-11-01 23:19:39	10.55	13.1	41215	4.28603		4.28603	-10.7543	-13.3537
2012-11-01 23:29:39	10.61	13.14	41215	4.29297	41215	4.29297	-10.8155	-13.3945
2012-11-01 23:39:39	10.65	13.2	41215	4.29992		4.29992	-10.8563	-13.4557
2012-11-01 23:49:39	10.71	13.26	41215	4.30686		4.30686	-10.9174	-13.5168
2012-11-01 23:59:39	10.75	13.3	41215	4.31381		4.31381	-10.9582	-13.5576
2012-11-02 00:09:39	10.78	13.35	41215	4.32075		4.32075	-10.9888	-13.6086
2012-11-02 00:19:39	10.87	13.4	41215	4.3277		4.3277	-11.0805	-13.6595
2012-11-02 00:29:39	10.91	13.47	41215	4.33464	41215	4.33464	-11.1213	-13.7309
2012-11-02 00:39:39	10.98	13.51	41215	4.34159		4.34159	-11.1927	-13.7717
2012-11-02 00:49:39	11.03	13.57	41215	4.34853		4.34853	-11.2436	-13.8328
2012-11-02 00:59:39	11.06	13.62	41215	4.35547		4.35547	-11.2742	-13.8838
2012-11-02 01:09:39	11.12	13.66	41215	4.36242		4.36242	-11.3354	-13.9246
2012-11-02 01:19:39	11.17	13.7	41215.1	4.36936		4.36936	-11.3863	-13.9653
2012-11-02 01:29:39	11.23	13.78	41215.1	4.37631	41215.1	4.37631	-11.4475	-14.0469
2012-11-02 01:39:39	11.26	13.79	41215.1	4.38325		4.38325	-11.4781	-14.0571
2012-11-02 01:49:39	11.31	13.85	41215.1	4.3902		4.3902	-11.5291	-14.1182
2012-11-02 01:59:39	11.33	13.89	41215.1	4.39714		4.39714	-11.5494	-14.159
2012-11-02 02:09:39	11.37	13.91	41215.1	4.40409		4.40409	-11.5902	-14.1794
2012-11-02 02:19:39	11.43	13.97	41215.1	4.41103		4.41103	-11.6514	-14.2406
2012-11-02 02:29:39	11.48	14.04	41215.1	4.41797	41215.1	4.41797	-11.7023	-14.3119
2012-11-02 02:39:39	11.55	14.09	41215.1	4.42492		4.42492	-11.7737	-14.3629
2012-11-02 02:49:39	11.57	14.14	41215.1	4.43186		4.43186	-11.7941	-14.4139
2012-11-02 02:59:39	11.61	14.18	41215.1	4.43881		4.43881	-11.8349	-14.4546
2012-11-02 03:09:39	11.65	14.22	41215.1	4.44575		4.44575	-11.8756	-14.4954
2012-11-02 03:19:39	11.69	14.24	41215.1	4.4527		4.4527	-11.9164	-14.5158
2012-11-02 03:29:39	11.73	14.3	41215.1	4.45964	41215.1	4.45964	-11.9572	-14.577
2012-11-02 03:39:39	11.76	14.34	41215.2	4.46659		4.46659	-11.9878	-14.6177
2012-11-02 03:49:39	11.78	14.36	41215.2	4.47353		4.47353	-12.0082	-14.6381
2012-11-02 03:59:39	11.83	14.4	41215.2	4.48047		4.48047	-12.0591	-14.6789
2012-11-02 04:09:39	11.87	14.43	41215.2	4.48742		4.48742	-12.0999	-14.7095
2012-11-02 04:19:39	11.9	14.48	41215.2	4.49436		4.49436	-12.1305	-14.7604
2012-11-02 04:29:39	11.94	14.51	41215.2	4.50131	41215.2	4.50131	-12.1713	-14.791
2012-11-02 04:39:39	11.99	14.56	41215.2	4.50825		4.50825	-12.2222	-14.842
2012-11-02 04:49:39	12.03	14.59	41215.2	4.5152		4.5152	-12.263	-14.8726
2012-11-02 04:59:39	12.07	14.64	41215.2	4.52214		4.52214	-12.3038	-14.9235
2012-11-02 05:09:39	12.11	14.68	41215.2	4.52909		4.52909	-12.3445	-14.9643
2012-11-02 05:19:39	12.16	14.73	41215.2	4.53603		4.53603	-12.3955	-15.0153
2012-11-02 05:29:39	12.2	14.78	41215.2	4.54297	41215.2	4.54297	-12.4363	-15.0663
2012-11-02 05:39:39	12.24	14.81	41215.2	4.54992		4.54992	-12.4771	-15.0968
2012-11-02 05:49:39	12.31	14.87	41215.2	4.55686		4.55686	-12.5484	-15.158
2012-11-02 05:59:39	12.34	14.92	41215.2	4.56381		4.56381	-12.579	-15.209
2012-11-02 06:09:39	12.41	14.98	41215.3	4.57075		4.57075	-12.6504	-15.2701
2012-11-02 06:19:39	12.44	15.01	41215.3	4.5777		4.5777	-12.6809	-15.3007
2012-11-02 06:29:39	12.51	15.09	41215.3	4.58464	41215.3	4.58464	-12.7523	-15.3823
2012-11-02 06:39:39	12.56	15.12	41215.3	4.59159		4.59159	-12.8033	-15.4128
2012-11-02 06:49:39	12.6	15.17	41215.3	4.59853		4.59853	-12.844	-15.4638
2012-11-02 06:59:39	12.65	15.22	41215.3	4.60547		4.60547	-12.895	-15.5148
2012-11-02 07:09:39	12.71	15.28	41215.3	4.61242		4.61242	-12.9562	-15.5759
2012-11-02 07:19:39	12.74	15.32	41215.3	4.61936		4.61936	-12.9867	-15.6167
2012-11-02 07:29:39	12.81	15.38	41215.3	4.62631	41215.3	4.62631	-13.0581	-15.6779
2012-11-02 07:39:39	12.84	15.41	41215.3	4.63325		4.63325	-13.0887	-15.7085
2012-11-02 07:49:39	12.88	15.47	41215.3	4.6402		4.6402	-13.1295	-15.7696
2012-11-02 07:59:39	12.91	15.5	41215.3	4.64714		4.64714	-13.16	-15.8002
2012-11-02 08:09:39	12.96	15.55	41215.3	4.65409		4.65409	-13.211	-15.8512
2012-11-02 08:19:39	12.97	15.55	41215.3	4.66103		4.66103	-13.2212	-15.8512
2012-11-02 08:29:39	13.01	15.59	41215.4	4.66797	41215.4	4.66797	-13.262	-15.8919
2012-11-02 08:39:39	13.05	15.63	41215.4	4.67492		4.67492	-13.3028	-15.9327
2012-11-02 08:49:39	13.09	15.67	41215.4	4.68186		4.68186	-13.3435	-15.9735
2012-11-02 08:59:39	13.12	15.69	41215.4	4.68881		4.68881	-13.3741	-15.9939
2012-11-02 09:09:39	13.15	15.73	41215.4	4.69575		4.69575	-13.4047	-16.0347
2012-11-02 09:19:39	13.16	15.72	41215.4	4.7027		4.7027	-13.4149	-16.0245
2012-11-02 09:29:39	13.19	15.78	41215.4	4.70964	41215.4	4.70964	-13.4455	-16.0856
2012-11-02 09:39:39	13.24	15.81	41215.4	4.71659		4.71659	-13.4964	-16.1162
2012-11-02 09:49:39	13.28	15.84	41215.4	4.72353		4.72353	-13.5372	-16.1468
2012-11-02 09:59:39	13.32	15.88	41215.4	4.73047		4.73047	-13.578	-16.1876
2012-11-02 10:09:39	13.36	15.91	41215.4	4.73742		4.73742	-13.6188	-16.2181
2012-11-02 10:19:39	13.4	15.96	41215.4	4.74436		4.74436	-13.6595	-16.2691
2012-11-02 10:29:39	13.43	16.01	41215.4	4.75131	41215.4	4.75131	-13.6901	-16.3201
2012-11-02 10:39:39	13.49	16.05	41215.4	4.75825		4.75825	-13.7513	-16.3609
2012-11-02 10:49:39	13.54	16.12	41215.5	4.7652		4.7652	-13.8022	-16.4322
2012-11-02 10:59:39	13.54	16.08	41215.5	4.77214		4.77214	-13.8022	-16.3914
2012-11-02 11:09:39	13.58	16.16	41215.5	4.77909		4.77909	-13.843	-16.473
2012-11-02 11:19:39	13.56	16.15	41215.5	4.78603		4.78603	-13.8226	-16.4628
2012-11-02 11:29:39	13.63	16.21	41215.5	4.79297	41215.5	4.79297	-13.894	-16.524
2012-11-02 11:39:39	13.66	16.23	41215.5	4.79992		4.79992	-13.9246	-16.5443
2012-11-02 11:49:39	13.72	16.3	41215.5	4.80686		4.80686	-13.9857	-16.6157
2012-11-02 11:59:39	13.75	16.37	41215.5	4.81381		4.81381	-14.0163	-16.6871
2012-11-02 12:09:39	13.8	16.37	41215.5	4.82075		4.82075	-14.0673	-16.6871
2012-11-02 12:19:39	13.88	16.42	41215.5	4.8277		4.8277	-14.1488	-16.738
2012-11-02 12:29:39	13.91	16.45	41215.5	4.83464	41215.5	4.83464	-14.1794	-16.7686
2012-11-02 12:39:39	13.94	16.53	41215.5	4.84159		4.84159	-14.21	-16.8502
2012-11-02 12:49:39	13.97	16.55	41215.5	4.84853		4.84853	-14.2406	-16.8705
2012-11-02 12:59:39	14.02	16.61	41215.5	4.85547		4.85547	-14.2915	-16.9317
2012-11-02 13:09:39	14.08	16.65	41215.5	4.86242		4.86242	-14.3527	-16.9725
2012-11-02 13:19:39	14.12	16.69	41215.6	4.86936		4.86936	-14.3935	-17.0133
2012-11-02 13:29:39	14.16	16.73	41215.6	4.87631	41215.6	4.87631	-14.4343	-17.054
2012-11-02 13:39:39	14.21	16.78	41215.6	4.88325		4.88325	-14.4852	-17.105
2012-11-02 13:49:39	14.26	16.84	41215.6	4.8902		4.8902	-14.5362	-17.1662
2012-11-02 13:59:39	14.31	16.89	41215.6	4.89714		4.89714	-14.5872	-17.2171
2012-11-02 14:09:39	14.35	16.94	41215.6	4.90409		4.90409	-14.6279	-17.2681
2012-11-02 14:19:39	14.39	16.98	41215.6	4.91103		4.91103	-14.6687	-17.3089
2012-11-02 14:29:39	14.44	17.02	41215.6	4.91797	41215.6	4.91797	-14.7197	-17.3496
2012-11-02 14:39:39	14.36	16.99	41215.6	4.92492		4.92492	-14.6381	-17.3191
2012-11-02 14:49:39	14.25	16.82	41215.6	4.93186		4.93186	-14.526	-17.1458
2012-11-02 14:59:39	14.33	16.89	41215.6	4.93881		4.93881	-14.6075	-17.2171
2012-11-02 15:09:39	14.44	17.01	41215.6	4.94575		4.94575	-14.7197	-17.3394
2012-11-02 15:19:39	14.51	17.08	41215.6	4.9527		4.9527	-14.791	-17.4108
2012-11-02 15:29:39	14.54	17.11	41215.6	4.95964	41215.6	4.95964	-14.8216	-17.4414
2012-11-02 15:39:39	14.6	17.17	41215.7	4.96659		4.96659	-14.8828	-17.5025
2012-11-02 15:49:39	14.66	17.22	41215.7	4.97353		4.97353	-14.9439	-17.5535
2012-11-02 15:59:39	14.71	17.28	41215.7	4.98047		4.98047	-14.9949	-17.6147
2012-11-02 16:09:39	14.75	17.32	41215.7	4.98742		4.98742	-15.0357	-17.6555
2012-11-02 16:19:39	14.82	17.38	41215.7	4.99436		4.99436	-15.107	-17.7166
2012-11-02 16:29:39	14.88	17.45	41215.7	5.00131	41215.7	5.00131	-15.1682	-17.788
2012-11-02 16:39:39	14.93	17.49	41215.7	5.00825		5.00825	-15.2192	-17.8287
2012-11-02 16:49:39	14.99	17.56	41215.7	5.0152		5.0152	-15.2803	-17.9001
2012-11-02 16:59:39	15.07	17.64	41215.7	5.02214		5.02214	-15.3619	-17.9817
2012-11-02 17:09:39	15.13	17.69	41215.7	5.02909		5.02909	-15.423	-18.0326
2012-11-02 17:19:39	15.18	17.75	41215.7	5.03603		5.03603	-15.474	-18.0938
2012-11-02 17:29:39	15.24	17.81	41215.7	5.04297	41215.7	5.04297	-15.5352	-18.1549
2012-11-02 17:39:39	15.31	17.88	41215.7	5.04992		5.04992	-15.6065	-18.2263
2012-11-02 17:49:39	15.37	17.95	41215.7	5.05686		5.05686	-15.6677	-18.2977
2012-11-02 17:59:39	15.43	18	41215.7	5.06381		5.06381	-15.7288	-18.3486
2012-11-02 18:09:39	15.5	18.06	41215.8	5.07075		5.07075	-15.8002	-18.4098
2012-11-02 18:19:39	15.56	18.13	41215.8	5.0777		5.0777	-15.8614	-18.4811
2012-11-02 18:29:39	15.63	18.2	41215.8	5.08464	41215.8	5.08464	-15.9327	-18.5525
2012-11-02 18:39:39	15.68	18.26	41215.8	5.09159		5.09159	-15.9837	-18.6137
2012-11-02 18:49:39	15.75	18.31	41215.8	5.09853		5.09853	-16.055	-18.6646
2012-11-02 18:59:39	15.81	18.38	41215.8	5.10547		5.10547	-16.1162	-18.736
2012-11-02 19:09:39	15.88	18.46	41215.8	5.11242		5.11242	-16.1876	-18.8175
2012-11-02 19:19:39	15.95	18.53	41215.8	5.11936		5.11936	-16.2589	-18.8889
2012-11-02 19:29:39	16.03	18.61	41215.8	5.12631	41215.8	5.12631	-16.3405	-18.9704
2012-11-02 19:39:39	16.1	18.67	41215.8	5.13325		5.13325	-16.4118	-19.0316
2012-11-02 19:49:39	16.15	18.72	41215.8	5.1402		5.1402	-16.4628	-19.0826
2012-11-02 19:59:39	16.22	18.8	41215.8	5.14714		5.14714	-16.5341	-19.1641
2012-11-02 20:09:39	16.29	18.87	41215.8	5.15409		5.15409	-16.6055	-19.2355
2012-11-02 20:19:39	16.32	18.9	41215.8	5.16103		5.16103	-16.6361	-19.2661
2012-11-02 20:29:39	16.38	18.95	41215.9	5.16797	41215.9	5.16797	-16.6972	-19.317
2012-11-02 20:39:39	16.45	19.05	41215.9	5.17492		5.17492	-16.7686	-19.419
2012-11-02 20:49:39	16.53	19.13	41215.9	5.18186		5.18186	-16.8502	-19.5005
2012-11-02 20:59:39	16.6	19.2	41215.9	5.18881		5.18881	-16.9215	-19.5719
2012-11-02 21:09:39	16.66	19.26	41215.9	5.19575		5.19575	-16.9827	-19.633
2012-11-02 21:19:39	16.72	19.32	41215.9	5.2027		5.2027	-17.0438	-19.6942
2012-11-02 21:29:39	16.79	19.39	41215.9	5.20964	41215.9	5.20964	-17.1152	-19.7655
2012-11-02 21:39:39	16.86	19.45	41215.9	5.21659		5.21659	-17.1865	-19.8267
2012-11-02 21:49:39	16.94	19.54	41215.9	5.22353		5.22353	-17.2681	-19.9185
2012-11-02 21:59:39	17	19.59	41215.9	5.23047		5.23047	-17.3293	-19.9694
2012-11-02 22:09:39	17.08	19.67	41215.9	5.23742		5.23742	-17.4108	-20.051
2012-11-02 22:19:39	17.15	19.74	41215.9	5.24436		5.24436	-17.4822	-20.1223
2012-11-02 22:29:39	17.22	19.81	41215.9	5.25131	41215.9	5.25131	-17.5535	-20.1937
2012-11-02 22:39:39	17.28	19.88	41215.9	5.25825		5.25825	-17.6147	-20.265
2012-11-02 22:49:39	17.37	19.95	41216	5.2652		5.2652	-17.7064	-20.3364
2012-11-02 22:59:39	17.41	20.01	41216	5.27214		5.27214	-17.7472	-20.3976
2012-11-02 23:09:39	17.48	20.08	41216	5.27909		5.27909	-17.8186	-20.4689
2012-11-02 23:19:39	17.55	20.14	41216	5.28603		5.28603	-17.8899	-20.5301
2012-11-02 23:29:39	17.6	20.2	41216	5.29297	41216	5.29297	-17.9409	-20.5912
2012-11-02 23:39:39	17.66	20.29	41216	5.29992		5.29992	-18.002	-20.683
2012-11-02 23:49:39	17.74	20.34	41216	5.30686		5.30686	-18.0836	-20.7339
2012-11-02 23:59:39	17.81	20.4	41216	5.31381		5.31381	-18.1549	-20.7951
2012-11-03 00:09:39	17.87	20.46	41216	5.32075		5.32075	-18.2161	-20.8563
2012-11-03 00:19:39	17.91	20.51	41216	5.3277		5.3277	-18.2569	-20.9072
2012-11-03 00:29:39	18	20.59	41216	5.33464	41216	5.33464	-18.3486	-20.9888
2012-11-03 00:39:39	18.07	20.66	41216	5.34159		5.34159	-18.42	-21.0601
2012-11-03 00:49:39	18.13	20.73	41216	5.34853		5.34853	-18.4811	-21.1315
2012-11-03 00:59:39	18.22	20.8	41216	5.35547		5.35547	-18.5729	-21.2029
2012-11-03 01:09:39	18.29	20.9	41216	5.36242		5.36242	-18.6442	-21.3048
2012-11-03 01:19:39	18.34	20.94	41216.1	5.36936		5.36936	-18.6952	-21.3456
2012-11-03 01:29:39	18.43	21.03	41216.1	5.37631	41216.1	5.37631	-18.787	-21.4373
2012-11-03 01:39:39	18.51	21.1	41216.1	5.38325		5.38325	-18.8685	-21.5087
2012-11-03 01:49:39	18.57	21.17	41216.1	5.3902		5.3902	-18.9297	-21.58
2012-11-03 01:59:39	18.65	21.22	41216.1	5.39714		5.39714	-19.0112	-21.631
2012-11-03 02:09:39	18.7	21.28	41216.1	5.40409		5.40409	-19.0622	-21.6922
2012-11-03 02:19:39	18.8	21.37	41216.1	5.41103		5.41103	-19.1641	-21.7839
2012-11-03 02:29:39	18.85	21.46	41216.1	5.41797	41216.1	5.41797	-19.2151	-21.8756
2012-11-03 02:39:39	18.93	21.53	41216.1	5.42492		5.42492	-19.2966	-21.947
2012-11-03 02:49:39	18.99	21.59	41216.1	5.43186		5.43186	-19.3578	-22.0082
2012-11-03 02:59:39	19.08	21.65	41216.1	5.43881		5.43881	-19.4495	-22.0693
2012-11-03 03:09:39	19.14	21.74	41216.1	5.44575		5.44575	-19.5107	-22.1611
2012-11-03 03:19:39	19.22	21.82	41216.1	5.4527		5.4527	-19.5923	-22.2426
2012-11-03 03:29:39	19.29	21.87	41216.1	5.45964	41216.1	5.45964	-19.6636	-22.2936
2012-11-03 03:39:39	19.36	21.94	41216.2	5.46659		5.46659	-19.735	-22.3649
2012-11-03 03:49:39	19.42	22.01	41216.2	5.47353		5.47353	-19.7961	-22.4363
2012-11-03 03:59:39	19.51	22.09	41216.2	5.48047		5.48047	-19.8879	-22.5178
2012-11-03 04:09:39	19.56	22.16	41216.2	5.48742		5.48742	-19.9388	-22.5892
2012-11-03 04:19:39	19.62	22.21	41216.2	5.49436		5.49436	-20	-22.6402
2012-11-03 04:29:39	19.71	22.31	41216.2	5.50131	41216.2	5.50131	-20.0917	-22.7421
2012-11-03 04:39:39	19.79	22.37	41216.2	5.50825		5.50825	-20.1733	-22.8033
2012-11-03 04:49:39	19.86	22.45	41216.2	5.5152		5.5152	-20.2446	-22.8848
2012-11-03 04:59:39	19.92	22.51	41216.2	5.52214		5.52214	-20.3058	-22.946
2012-11-03 05:09:39	19.99	22.59	41216.2	5.52909		5.52909	-20.3772	-23.0275
2012-11-03 05:19:39	20.06	22.65	41216.2	5.53603		5.53603	-20.4485	-23.0887
2012-11-03 05:29:39	20.12	22.73	41216.2	5.54297	41216.2	5.54297	-20.5097	-23.1702
2012-11-03 05:39:39	20.21	22.81	41216.2	5.54992		5.54992	-20.6014	-23.2518
2012-11-03 05:49:39	20.28	22.88	41216.2	5.55686		5.55686	-20.6728	-23.3231
2012-11-03 05:59:39	20.36	22.94	41216.2	5.56381		5.56381	-20.7543	-23.3843
2012-11-03 06:09:39	20.42	23.01	41216.3	5.57075		5.57075	-20.8155	-23.4557
2012-11-03 06:19:39	20.5	23.08	41216.3	5.5777		5.5777	-20.897	-23.527
2012-11-03 06:29:39	20.57	23.17	41216.3	5.58464	41216.3	5.58464	-20.9684	-23.6188
2012-11-03 06:39:39	20.62	23.23	41216.3	5.59159		5.59159	-21.0194	-23.6799
2012-11-03 06:49:39	20.71	23.29	41216.3	5.59853		5.59853	-21.1111	-23.7411
2012-11-03 06:59:39	20.77	23.38	41216.3	5.60547		5.60547	-21.1723	-23.8328
2012-11-03 07:09:39	20.85	23.46	41216.3	5.61242		5.61242	-21.2538	-23.9144
2012-11-03 07:19:39	20.91	23.53	41216.3	5.61936		5.61936	-21.315	-23.9857
2012-11-03 07:29:39	20.98	23.6	41216.3	5.62631	41216.3	5.62631	-21.3863	-24.0571
2012-11-03 07:39:39	21.03	23.63	41216.3	5.63325		5.63325	-21.4373	-24.0877
2012-11-03 07:49:39	21.11	23.71	41216.3	5.6402		5.6402	-21.5189	-24.1692
2012-11-03 07:59:39	21.16	23.77	41216.3	5.64714		5.64714	-21.5698	-24.2304
2012-11-03 08:09:39	21.21	23.82	41216.3	5.65409		5.65409	-21.6208	-24.2813
2012-11-03 08:19:39	21.31	23.91	41216.3	5.66103		5.66103	-21.7227	-24.3731
2012-11-03 08:29:39	21.37	23.98	41216.4	5.66797	41216.4	5.66797	-21.7839	-24.4444
2012-11-03 08:39:39	21.45	24.06	41216.4	5.67492		5.67492	-21.8654	-24.526
2012-11-03 08:49:39	21.53	24.14	41216.4	5.68186		5.68186	-21.947	-24.6075
2012-11-03 08:59:39	21.62	24.21	41216.4	5.68881		5.68881	-22.0387	-24.6789
2012-11-03 09:09:39	21.69	24.3	41216.4	5.69575		5.69575	-22.1101	-24.7706
2012-11-03 09:19:39	21.78	24.38	41216.4	5.7027		5.7027	-22.2018	-24.8522
2012-11-03 09:29:39	21.87	24.48	41216.4	5.70964	41216.4	5.70964	-22.2936	-24.9541
2012-11-03 09:39:39	21.94	24.55	41216.4	5.71659		5.71659	-22.3649	-25.0255
2012-11-03 09:49:39	22.01	24.61	41216.4	5.72353		5.72353	-22.4363	-25.0866
2012-11-03 09:59:39	22.1	24.71	41216.4	5.73047		5.73047	-22.528	-25.1886
2012-11-03 10:09:39	22.18	24.78	41216.4	5.73742		5.73742	-22.6096	-25.2599
2012-11-03 10:19:39	22.23	24.84	41216.4	5.74436		5.74436	-22.6606	-25.3211
2012-11-03 10:29:39	22.19	24.79	41216.4	5.75131	41216.4	5.75131	-22.6198	-25.2701
2012-11-03 10:39:39	22.33	24.92	41216.4	5.75825		5.75825	-22.7625	-25.4027
2012-11-03 10:49:39	22.42	25.01	41216.5	5.7652		5.7652	-22.8542	-25.4944
2012-11-03 10:59:39	22.48	25.08	41216.5	5.77214		5.77214	-22.9154	-25.5657
2012-11-03 11:09:39	22.51	25.17	41216.5	5.77909		5.77909	-22.946	-25.6575
2012-11-03 11:19:39	22.64	25.23	41216.5	5.78603		5.78603	-23.0785	-25.7187
2012-11-03 11:29:39	22.72	25.32	41216.5	5.79297	41216.5	5.79297	-23.16	-25.8104
2012-11-03 11:39:39	22.79	25.39	41216.5	5.79992		5.79992	-23.2314	-25.8818
2012-11-03 11:49:39	22.86	25.46	41216.5	5.80686		5.80686	-23.3028	-25.9531
2012-11-03 11:59:39	22.91	25.52	41216.5	5.81381		5.81381	-23.3537	-26.0143
2012-11-03 12:09:39	23.01	25.6	41216.5	5.82075		5.82075	-23.4557	-26.0958
2012-11-03 12:19:39	23.07	25.68	41216.5	5.8277		5.8277	-23.5168	-26.1774
2012-11-03 12:29:39	23.15	25.75	41216.5	5.83464	41216.5	5.83464	-23.5984	-26.2487
2012-11-03 12:39:39	23.22	25.82	41216.5	5.84159		5.84159	-23.6697	-26.3201
2012-11-03 12:49:39	23.3	25.9	41216.5	5.84853		5.84853	-23.7513	-26.4016
2012-11-03 12:59:39	23.38	25.98	41216.5	5.85547		5.85547	-23.8328	-26.4832
2012-11-03 13:09:39	23.45	26.06	41216.5	5.86242		5.86242	-23.9042	-26.5647
2012-11-03 13:19:39	23.53	26.13	41216.6	5.86936		5.86936	-23.9857	-26.6361
2012-11-03 13:29:39	23.6	26.21	41216.6	5.87631	41216.6	5.87631	-24.0571	-26.7176
2012-11-03 13:39:39	23.69	26.29	41216.6	5.88325		5.88325	-24.1488	-26.7992
2012-11-03 13:49:39	23.75	26.36	41216.6	5.8902		5.8902	-24.21	-26.8705
2012-11-03 13:59:39	23.84	26.44	41216.6	5.89714		5.89714	-24.3017	-26.9521
2012-11-03 14:09:39	23.94	26.54	41216.6	5.90409		5.90409	-24.4037	-27.054
2012-11-03 14:19:39	24	26.61	41216.6	5.91103		5.91103	-24.4648	-27.1254
2012-11-03 14:29:39	24.07	26.69	41216.6	5.91797	41216.6	5.91797	-24.5362	-27.2069
2012-11-03 14:39:39	24.15	26.77	41216.6	5.92492		5.92492	-24.6177	-27.2885
2012-11-03 14:49:39	24.25	26.85	41216.6	5.93186		5.93186	-24.7197	-27.37
2012-11-03 14:59:39	24.32	26.93	41216.6	5.93881		5.93881	-24.791	-27.4516
2012-11-03 15:09:39	24.4	27.01	41216.6	5.94575		5.94575	-24.8726	-27.5331
2012-11-03 15:19:39	23.85	26.44	41216.6	5.9527		5.9527	-24.3119	-26.9521
2012-11-03 15:29:39	24.17	26.79	41216.6	5.95964	41216.6	5.95964	-24.6381	-27.3089
2012-11-03 15:39:39	24.38	26.98	41216.7	5.96659		5.96659	-24.8522	-27.5025
2012-11-03 15:49:39	24.41	27.01	41216.7	5.97353		5.97353	-24.8828	-27.5331
2012-11-03 15:59:39	24.44	27.06	41216.7	5.98047		5.98047	-24.9134	-27.5841
2012-11-03 16:09:39	24.52	27.14	41216.7	5.98742		5.98742	-24.9949	-27.6656
2012-11-03 16:19:39	24.6	27.22	41216.7	5.99436		5.99436	-25.0765	-27.7472
2012-11-03 16:29:39	24.67	27.3	41216.7	6.00131	41216.7	6.00131	-25.1478	-27.8287
2012-11-03 16:39:39	24.75	27.37	41216.7	6.00825		6.00825	-25.2294	-27.9001
2012-11-03 16:49:39	24.84	27.47	41216.7	6.0152		6.0152	-25.3211	-28.002
2012-11-03 16:59:39	24.92	27.54	41216.7	6.02214		6.02214	-25.4027	-28.0734
2012-11-03 17:09:39	25.01	27.63	41216.7	6.02909		6.02909	-25.4944	-28.1651
2012-11-03 17:19:39	25.09	27.71	41216.7	6.03603		6.03603	-25.5759	-28.2467
2012-11-03 17:29:39	25.16	27.79	41216.7	6.04297	41216.7	6.04297	-25.6473	-28.3282
2012-11-03 17:39:39	25.25	27.88	41216.7	6.04992		6.04992	-25.739	-28.42
2012-11-03 17:49:39	25.32	27.94	41216.7	6.05686		6.05686	-25.8104	-28.4811
2012-11-03 17:59:39	25.4	28.03	41216.7	6.06381		6.06381	-25.8919	-28.5729
2012-11-03 18:09:39	25.49	28.11	41216.8	6.07075		6.07075	-25.9837	-28.6544
2012-11-03 18:19:39	25.57	28.2	41216.8	6.0777		6.0777	-26.0652	-28.7462
2012-11-03 18:29:39	25.56	28.19	41216.8	6.08464	41216.8	6.08464	-26.055	-28.736
2012-11-03 18:39:39	25.72	28.33	41216.8	6.09159		6.09159	-26.2181	-28.8787
2012-11-03 18:49:39	25.81	28.42	41216.8	6.09853		6.09853	-26.3099	-28.9704
2012-11-03 18:59:39	25.87	28.49	41216.8	6.10547		6.10547	-26.371	-29.0418
2012-11-03 19:09:39	25.98	28.59	41216.8	6.11242		6.11242	-26.4832	-29.1437
2012-11-03 19:19:39	26.06	28.69	41216.8	6.11936		6.11936	-26.5647	-29.2457
2012-11-03 19:29:39	26.17	28.78	41216.8	6.12631	41216.8	6.12631	-26.6769	-29.3374
2012-11-03 19:39:39	26.26	28.87	41216.8	6.13325		6.13325	-26.7686	-29.4292
2012-11-03 19:49:39	26.3	28.96	41216.8	6.1402		6.1402	-26.8094	-29.5209
2012-11-03 19:59:39	26.44	29.06	41216.8	6.14714		6.14714	-26.9521	-29.6228
2012-11-03 20:09:39	26.51	29.13	41216.8	6.15409		6.15409	-27.0234	-29.6942
2012-11-03 20:19:39	26.63	29.23	41216.8	6.16103		6.16103	-27.1458	-29.7961
2012-11-03 20:29:39	26.71	29.33	41216.9	6.16797	41216.9	6.16797	-27.2273	-29.8981
2012-11-03 20:39:39	26.82	29.44	41216.9	6.17492		6.17492	-27.3394	-30.0102
2012-11-03 20:49:39	26.9	29.53	41216.9	6.18186		6.18186	-27.421	-30.1019
2012-11-03 20:59:39	27	29.62	41216.9	6.18881		6.18881	-27.5229	-30.1937
2012-11-03 21:09:39	27.09	29.72	41216.9	6.19575		6.19575	-27.6147	-30.2956
2012-11-03 21:19:39	27.17	29.79	41216.9	6.2027		6.2027	-27.6962	-30.367
2012-11-03 21:29:39	27.27	29.9	41216.9	6.20964	41216.9	6.20964	-27.7982	-30.4791
2012-11-03 21:39:39	27.36	29.98	41216.9	6.21659		6.21659	-27.8899	-30.5607
2012-11-03 21:49:39	27.47	30.09	41216.9	6.22353		6.22353	-28.002	-30.6728
2012-11-03 21:59:39	27.57	30.2	41216.9	6.23047		6.23047	-28.104	-30.7849
2012-11-03 22:09:39	27.66	30.29	41216.9	6.23742		6.23742	-28.1957	-30.8767
2012-11-03 22:19:39	27.76	30.38	41216.9	6.24436		6.24436	-28.2977	-30.9684
2012-11-03 22:29:39	27.86	30.5	41216.9	6.25131	41216.9	6.25131	-28.3996	-31.0907
2012-11-03 22:39:39	27.97	30.6	41216.9	6.25825		6.25825	-28.5117	-31.1927
2012-11-03 22:49:39	28.07	30.7	41217	6.2652		6.2652	-28.6137	-31.2946
2012-11-03 22:59:39	28.18	30.81	41217	6.27214		6.27214	-28.7258	-31.4067
2012-11-03 23:09:39	28.27	30.89	41217	6.27909		6.27909	-28.8175	-31.4883
2012-11-03 23:19:39	28.38	31.01	41217	6.28603		6.28603	-28.9297	-31.6106
2012-11-03 23:29:39	28.49	31.12	41217	6.29297	41217	6.29297	-29.0418	-31.7227
2012-11-03 23:39:39	28.63	31.23	41217	6.29992		6.29992	-29.1845	-31.8349
2012-11-03 23:49:39	28.71	31.34	41217	6.30686		6.30686	-29.2661	-31.947
2012-11-03 23:59:39	28.81	31.44	41217	6.31381		6.31381	-29.368	-32.0489
2012-11-04 00:09:39	28.9	31.54	41217	6.32075		6.32075	-29.4597	-32.1509
2012-11-04 00:19:39	29.02	31.65	41217	6.3277		6.3277	-29.5821	-32.263
2012-11-04 00:29:39	29.13	31.76	41217	6.33464	41217	6.33464	-29.6942	-32.3751
2012-11-04 00:39:39	29.22	31.86	41217	6.34159		6.34159	-29.7859	-32.4771
2012-11-04 00:49:39	29.33	31.97	41217	6.34853		6.34853	-29.8981	-32.5892
2012-11-04 00:59:39	29.44	32.07	41217	6.35547		6.35547	-30.0102	-32.6911
2012-11-04 01:09:39	29.55	32.18	41217	6.36242		6.36242	-30.1223	-32.8033
2012-11-04 01:19:39	29.64	32.28	41217.1	6.36936		6.36936	-30.2141	-32.9052
2012-11-04 01:29:39	29.74	32.37	41217.1	6.37631	41217.1	6.37631	-30.316	-32.9969
2012-11-04 01:39:39	29.85	32.49	41217.1	6.38325		6.38325	-30.4281	-33.1193
2012-11-04 01:49:39	29.97	32.6	41217.1	6.3902		6.3902	-30.5505	-33.2314
2012-11-04 01:59:39	30.08	32.72	41217.1	6.39714		6.39714	-30.6626	-33.3537
2012-11-04 02:09:39	30.2	32.61	41217.1	6.40409		6.40409	-30.7849	-33.2416
2012-11-04 02:19:39	30.31	32.95	41217.1	6.41103		6.41103	-30.897	-33.5882
2012-11-04 02:29:39	30.41	33.05	41217.1	6.41797	41217.1	6.41797	-30.999	-33.6901
2012-11-04 02:39:39	30.51	33.15	41217.1	6.42492		6.42492	-31.1009	-33.792
2012-11-04 02:49:39	30.62	33.25	41217.1	6.43186		6.43186	-31.213	-33.894
2012-11-04 02:59:39	30.72	33.37	41217.1	6.43881		6.43881	-31.315	-34.0163
2012-11-04 03:09:39	30.83	33.46	41217.1	6.44575		6.44575	-31.4271	-34.1081
2012-11-04 03:19:39	30.93	33.57	41217.1	6.4527		6.4527	-31.5291	-34.2202
2012-11-04 03:29:39	31.04	33.69	41217.1	6.45964	41217.1	6.45964	-31.6412	-34.3425
2012-11-04 03:39:39	31.15	33.8	41217.2	6.46659		6.46659	-31.7533	-34.4546
2012-11-04 03:49:39	31.26	33.91	41217.2	6.47353		6.47353	-31.8654	-34.5668
2012-11-04 03:59:39	31.38	34.02	41217.2	6.48047		6.48047	-31.9878	-34.6789
2012-11-04 04:09:39	31.48	34.12	41217.2	6.48742		6.48742	-32.0897	-34.7808
2012-11-04 04:19:39	31.57	34.22	41217.2	6.49436		6.49436	-32.1814	-34.8828
2012-11-04 04:29:39	31.68	34.33	41217.2	6.50131	41217.2	6.50131	-32.2936	-34.9949
2012-11-04 04:39:39	31.8	34.44	41217.2	6.50825		6.50825	-32.4159	-35.107
2012-11-04 04:49:39	31.92	34.56	41217.2	6.5152		6.5152	-32.5382	-35.2294
2012-11-04 04:59:39	32.03	34.68	41217.2	6.52214		6.52214	-32.6504	-35.3517
2012-11-04 05:09:39	32.14	34.79	41217.2	6.52909		6.52909	-32.7625	-35.4638
2012-11-04 05:19:39	32.25	34.88	41217.2	6.53603		6.53603	-32.8746	-35.5556
2012-11-04 05:29:39	32.36	35.01	41217.2	6.54297	41217.2	6.54297	-32.9867	-35.6881
2012-11-04 05:39:39	32.49	35.1	41217.2	6.54992		6.54992	-33.1193	-35.7798
2012-11-04 05:49:39	32.6	35.24	41217.2	6.55686		6.55686	-33.2314	-35.9225
2012-11-04 05:59:39	32.71	35.36	41217.2	6.56381		6.56381	-33.3435	-36.0449
2012-11-04 06:09:39	32.82	35.46	41217.3	6.57075		6.57075	-33.4557	-36.1468
2012-11-04 06:19:39	32.94	35.59	41217.3	6.5777		6.5777	-33.578	-36.2793
2012-11-04 06:29:39	33.04	35.66	41217.3	6.58464	41217.3	6.58464	-33.6799	-36.3507
2012-11-04 06:39:39	33.13	35.78	41217.3	6.59159		6.59159	-33.7717	-36.473
2012-11-04 06:49:39	33.27	35.92	41217.3	6.59853		6.59853	-33.9144	-36.6157
2012-11-04 06:59:39	33.37	36.02	41217.3	6.60547		6.60547	-34.0163	-36.7176
2012-11-04 07:09:39	33.49	36.14	41217.3	6.61242		6.61242	-34.1386	-36.84
2012-11-04 07:19:39	33.6	36.25	41217.3	6.61936		6.61936	-34.2508	-36.9521
2012-11-04 07:29:39	33.71	36.36	41217.3	6.62631	41217.3	6.62631	-34.3629	-37.0642
2012-11-04 07:39:39	33.82	36.44	41217.3	6.63325		6.63325	-34.475	-37.1458
2012-11-04 07:49:39	33.91	36.56	41217.3	6.6402		6.6402	-34.5668	-37.2681
2012-11-04 07:59:39	34.03	36.68	41217.3	6.64714		6.64714	-34.6891	-37.3904
2012-11-04 08:09:39	34.12	36.78	41217.3	6.65409		6.65409	-34.7808	-37.4924
2012-11-04 08:19:39	34.24	36.88	41217.3	6.66103		6.66103	-34.9032	-37.5943
2012-11-04 08:29:39	34.34	37	41217.4	6.66797	41217.4	6.66797	-35.0051	-37.7166
2012-11-04 08:39:39	34.45	37.11	41217.4	6.67492		6.67492	-35.1172	-37.8287
2012-11-04 08:49:39	34.54	37.2	41217.4	6.68186		6.68186	-35.209	-37.9205
2012-11-04 08:59:39	34.67	37.33	41217.4	6.68881		6.68881	-35.3415	-38.053
2012-11-04 09:09:39	34.77	37.4	41217.4	6.69575		6.69575	-35.4434	-38.1244
2012-11-04 09:19:39	34.87	37.53	41217.4	6.7027		6.7027	-35.5454	-38.2569
2012-11-04 09:29:39	34.97	37.63	41217.4	6.70964	41217.4	6.70964	-35.6473	-38.3588
2012-11-04 09:39:39	35	37.72	41217.4	6.71659		6.71659	-35.6779	-38.4506
2012-11-04 09:49:39	35.19	37.83	41217.4	6.72353		6.72353	-35.8716	-38.5627
2012-11-04 09:59:39	35.29	37.96	41217.4	6.73047		6.73047	-35.9735	-38.6952
2012-11-04 10:09:39	35.41	38.06	41217.4	6.73742		6.73742	-36.0958	-38.7971
2012-11-04 10:19:39	35.52	38.18	41217.4	6.74436		6.74436	-36.208	-38.9195
2012-11-04 10:29:39	35.63	38.28	41217.4	6.75131	41217.4	6.75131	-36.3201	-39.0214
2012-11-04 10:39:39	35.74	38.39	41217.4	6.75825		6.75825	-36.4322	-39.1335
2012-11-04 10:49:39	35.85	38.51	41217.5	6.7652		6.7652	-36.5443	-39.2559
2012-11-04 10:59:39	35.94	38.6	41217.5	6.77214		6.77214	-36.6361	-39.3476
2012-11-04 11:09:39	36.05	38.71	41217.5	6.77909		6.77909	-36.7482	-39.4597
2012-11-04 11:19:39	36.19	38.84	41217.5	6.78603		6.78603	-36.8909	-39.5923
2012-11-04 11:29:39	36.23	38.88	41217.5	6.79297	41217.5	6.79297	-36.9317	-39.633
2012-11-04 11:39:39	36.34	38.98	41217.5	6.79992		6.79992	-37.0438	-39.735
2012-11-04 11:49:39	36.45	39.13	41217.5	6.80686		6.80686	-37.156	-39.8879
2012-11-04 11:59:39	36.56	39.21	41217.5	6.81381		6.81381	-37.2681	-39.9694
2012-11-04 12:09:39	36.67	39.33	41217.5	6.82075		6.82075	-37.3802	-40.0917
2012-11-04 12:19:39	36.79	39.42	41217.5	6.8277		6.8277	-37.5025	-40.1835
2012-11-04 12:29:39	36.89	39.53	41217.5	6.83464	41217.5	6.83464	-37.6045	-40.2956
2012-11-04 12:39:39	37	39.66	41217.5	6.84159		6.84159	-37.7166	-40.4281
2012-11-04 12:49:39	37.12	39.77	41217.5	6.84853		6.84853	-37.8389	-40.5403
2012-11-04 12:59:39	37.25	39.91	41217.5	6.85547		6.85547	-37.9715	-40.683
2012-11-04 13:09:39	37.34	39.99	41217.5	6.86242		6.86242	-38.0632	-40.7645
2012-11-04 13:19:39	37.47	40.11	41217.6	6.86936		6.86936	-38.1957	-40.8869
2012-11-04 13:29:39	37.57	40.23	41217.6	6.87631	41217.6	6.87631	-38.2977	-41.0092
2012-11-04 13:39:39	37.7	40.35	41217.6	6.88325		6.88325	-38.4302	-41.1315
2012-11-04 13:49:39	37.8	40.47	41217.6	6.8902		6.8902	-38.5321	-41.2538
2012-11-04 13:59:39	37.92	40.58	41217.6	6.89714		6.89714	-38.6544	-41.366
2012-11-04 14:09:39	38.07	40.72	41217.6	6.90409		6.90409	-38.8073	-41.5087
2012-11-04 14:19:39	38.18	40.84	41217.6	6.91103		6.91103	-38.9195	-41.631
2012-11-04 14:29:39	38.28	40.93	41217.6	6.91797	41217.6	6.91797	-39.0214	-41.7227
2012-11-04 14:39:39	38.42	41.05	41217.6	6.92492		6.92492	-39.1641	-41.8451
2012-11-04 14:49:39	38.53	41.17	41217.6	6.93186		6.93186	-39.2762	-41.9674
2012-11-04 14:59:39	38.65	41.31	41217.6	6.93881		6.93881	-39.3986	-42.1101
2012-11-04 15:09:39	38.78	41.41	41217.6	6.94575		6.94575	-39.5311	-42.212
2012-11-04 15:19:39	38.69	41.58	41217.6	6.9527		6.9527	-39.4393	-42.3853
2012-11-04 15:29:39	38.74	41.41	41217.6	6.95964	41217.6	6.95964	-39.4903	-42.212
2012-11-04 15:39:39	38.94	41.62	41217.7	6.96659		6.96659	-39.6942	-42.4261
2012-11-04 15:49:39	39.1	41.75	41217.7	6.97353		6.97353	-39.8573	-42.5586
2012-11-04 15:59:39	39.23	41.85	41217.7	6.98047		6.98047	-39.9898	-42.6606
2012-11-04 16:09:39	39.33	42	41217.7	6.98742		6.98742	-40.0917	-42.8135
2012-11-04 16:19:39	39.47	42.13	41217.7	6.99436		6.99436	-40.2345	-42.946
2012-11-04 16:29:39	39.6	42.27	41217.7	7.00131	41217.7	7.00131	-40.367	-43.0887
2012-11-04 16:39:39	39.74	42.4	41217.7	7.00825		7.00825	-40.5097	-43.2212
2012-11-04 16:49:39	39.88	42.55	41217.7	7.0152		7.0152	-40.6524	-43.3741
2012-11-04 16:59:39	40.01	42.67	41217.7	7.02214		7.02214	-40.7849	-43.4964
2012-11-04 17:09:39	40.17	42.83	41217.7	7.02909		7.02909	-40.948	-43.6595
2012-11-04 17:19:39	40.28	42.96	41217.7	7.03603		7.03603	-41.0601	-43.792
2012-11-04 17:29:39	40.46	43.13	41217.7	7.04297	41217.7	7.04297	-41.2436	-43.9653
2012-11-04 17:39:39	40.61	43.27	41217.7	7.04992		7.04992	-41.3965	-44.1081
2012-11-04 17:49:39	40.74	43.41	41217.7	7.05686		7.05686	-41.5291	-44.2508
2012-11-04 17:59:39	40.87	43.54	41217.7	7.06381		7.06381	-41.6616	-44.3833
2012-11-04 18:09:39	41.02	43.69	41217.8	7.07075		7.07075	-41.8145	-44.5362
2012-11-04 18:19:39	41.17	43.83	41217.8	7.0777		7.0777	-41.9674	-44.6789
2012-11-04 18:29:39	41.3	43.95	41217.8	7.08464	41217.8	7.08464	-42.0999	-44.8012
2012-11-04 18:39:39	41.49	44.14	41217.8	7.09159		7.09159	-42.2936	-44.9949
2012-11-04 18:49:39	41.62	44.28	41217.8	7.09853		7.09853	-42.4261	-45.1376
2012-11-04 18:59:39	41.8	44.45	41217.8	7.10547		7.10547	-42.6096	-45.3109
2012-11-04 19:09:39	41.93	44.59	41217.8	7.11242		7.11242	-42.7421	-45.4536
2012-11-04 19:19:39	42.1	44.77	41217.8	7.11936		7.11936	-42.9154	-45.6371
2012-11-04 19:29:39	42.26	44.93	41217.8	7.12631	41217.8	7.12631	-43.0785	-45.8002
2012-11-04 19:39:39	42.36	45.02	41217.8	7.13325		7.13325	-43.1804	-45.8919
2012-11-04 19:49:39	42.53	45.18	41217.8	7.1402		7.1402	-43.3537	-46.055
2012-11-04 19:59:39	42.67	45.33	41217.8	7.14714		7.14714	-43.4964	-46.208
2012-11-04 20:09:39	42.83	45.49	41217.8	7.15409		7.15409	-43.6595	-46.371
2012-11-04 20:19:39	42.99	45.64	41217.8	7.16103		7.16103	-43.8226	-46.524
2012-11-04 20:29:39	43.13	45.81	41217.9	7.16797	41217.9	7.16797	-43.9653	-46.6972
2012-11-04 20:39:39	43.31	45.98	41217.9	7.17492		7.17492	-44.1488	-46.8705
2012-11-04 20:49:39	43.46	46.12	41217.9	7.18186		7.18186	-44.3017	-47.0133
2012-11-04 20:59:39	43.63	46.29	41217.9	7.18881		7.18881	-44.475	-47.1865
2012-11-04 21:09:39	43.76	46.42	41217.9	7.19575		7.19575	-44.6075	-47.3191
2012-11-04 21:19:39	43.89	46.57	41217.9	7.2027		7.2027	-44.7401	-47.472
2012-11-04 21:29:39	43.87	46.68	41217.9	7.20964	41217.9	7.20964	-44.7197	-47.5841
2012-11-04 21:39:39	44.13	46.79	41217.9	7.21659		7.21659	-44.9847	-47.6962
2012-11-04 21:49:39	44.28	46.96	41217.9	7.22353		7.22353	-45.1376	-47.8695
2012-11-04 21:59:39	44.39	47.06	41217.9	7.23047		7.23047	-45.2497	-47.9715
2012-11-04 22:09:39	44.52	47.2	41217.9	7.23742		7.23742	-45.3823	-48.1142
2012-11-04 22:19:39	44.66	47.32	41217.9	7.24436		7.24436	-45.525	-48.2365
2012-11-04 22:29:39	44.77	47.45	41217.9	7.25131	41217.9	7.25131	-45.6371	-48.369
2012-11-04 22:39:39	44.93	47.59	41217.9	7.25825		7.25825	-45.8002	-48.5117
2012-11-04 22:49:39	45.05	47.73	41218	7.2652		7.2652	-45.9225	-48.6544
2012-11-04 22:59:39	45.19	47.86	41218	7.27214		7.27214	-46.0652	-48.787
2012-11-04 23:09:39	45.31	47.99	41218	7.27909		7.27909	-46.1876	-48.9195
2012-11-04 23:19:39	45.47	48.14	41218	7.28603		7.28603	-46.3507	-49.0724
2012-11-04 23:29:39	45.61	48.3	41218	7.29297	41218	7.29297	-46.4934	-49.2355
2012-11-04 23:39:39	45.75	48.42	41218	7.29992		7.29992	-46.6361	-49.3578
2012-11-04 23:49:39	45.89	48.56	41218	7.30686		7.30686	-46.7788	-49.5005
2012-11-04 23:59:39	46.06	48.74	41218	7.31381		7.31381	-46.9521	-49.684
2012-11-05 00:09:39	46.18	48.86	41218	7.32075		7.32075	-47.0744	-49.8063
2012-11-05 00:19:39	46.29	49.02	41218	7.3277		7.3277	-47.1865	-49.9694
2012-11-05 00:29:39	46.51	49.17	41218	7.33464	41218	7.33464	-47.4108	-50.1223
2012-11-05 00:39:39	46.67	49.35	41218	7.34159		7.34159	-47.5739	-50.3058
2012-11-05 00:49:39	46.8	49.49	41218	7.34853		7.34853	-47.7064	-50.4485
2012-11-05 00:59:39	46.97	49.65	41218	7.35547		7.35547	-47.8797	-50.6116
2012-11-05 01:09:39	47.14	49.82	41218	7.36242		7.36242	-48.053	-50.7849
2012-11-05 01:19:39	47.28	49.96	41218.1	7.36936		7.36936	-48.1957	-50.9276
2012-11-05 01:29:39	47.44	50.11	41218.1	7.37631	41218.1	7.37631	-48.3588	-51.0805
2012-11-05 01:39:39	47.63	50.31	41218.1	7.38325		7.38325	-48.5525	-51.2844
2012-11-05 01:49:39	47.76	50.45	41218.1	7.3902		7.3902	-48.685	-51.4271
2012-11-05 01:59:39	47.92	50.61	41218.1	7.39714		7.39714	-48.8481	-51.5902
2012-11-05 02:09:39	48.1	50.78	41218.1	7.40409		7.40409	-49.0316	-51.7635
2012-11-05 02:19:39	48.25	50.93	41218.1	7.41103		7.41103	-49.1845	-51.9164
2012-11-05 02:29:39	48.43	51.11	41218.1	7.41797	41218.1	7.41797	-49.368	-52.0999
2012-11-05 02:39:39	48.59	51.19	41218.1	7.42492		7.42492	-49.5311	-52.1814
2012-11-05 02:49:39	48.74	51.42	41218.1	7.43186		7.43186	-49.684	-52.4159
2012-11-05 02:59:39	48.9	51.61	41218.1	7.43881		7.43881	-49.8471	-52.6096
2012-11-05 03:09:39	49.06	51.74	41218.1	7.44575		7.44575	-50.0102	-52.7421
2012-11-05 03:19:39	49.23	51.88	41218.1	7.4527		7.4527	-50.1835	-52.8848
2012-11-05 03:29:39	49.41	52.09	41218.1	7.45964	41218.1	7.45964	-50.367	-53.0989
2012-11-05 03:39:39	49.54	52.25	41218.2	7.46659		7.46659	-50.4995	-53.262
2012-11-05 03:49:39	49.71	52.4	41218.2	7.47353		7.47353	-50.6728	-53.4149
2012-11-05 03:59:39	49.9	52.6	41218.2	7.48047		7.48047	-50.8665	-53.6188
2012-11-05 04:09:39	50.07	52.77	41218.2	7.48742		7.48742	-51.0398	-53.792
2012-11-05 04:19:39	50.21	52.92	41218.2	7.49436		7.49436	-51.1825	-53.945
2012-11-05 04:29:39	50.39	53.08	41218.2	7.50131	41218.2	7.50131	-51.366	-54.1081
2012-11-05 04:39:39	50.54	53.23	41218.2	7.50825		7.50825	-51.5189	-54.261
2012-11-05 04:49:39	50.71	53.38	41218.2	7.5152		7.5152	-51.6922	-54.4139
2012-11-05 04:59:39	50.85	53.55	41218.2	7.52214		7.52214	-51.8349	-54.5872
2012-11-05 05:09:39	51.03	53.74	41218.2	7.52909		7.52909	-52.0183	-54.7808
2012-11-05 05:19:39	51.18	53.88	41218.2	7.53603		7.53603	-52.1713	-54.9235
2012-11-05 05:29:39	51.33	54.04	41218.2	7.54297	41218.2	7.54297	-52.3242	-55.0866
2012-11-05 05:39:39	51.5	54.19	41218.2	7.54992		7.54992	-52.4975	-55.2396
2012-11-05 05:49:39	51.67	54.34	41218.2	7.55686		7.55686	-52.6707	-55.3925
2012-11-05 05:59:39	51.83	54.49	41218.2	7.56381		7.56381	-52.8338	-55.5454
2012-11-05 06:09:39	51.97	54.67	41218.3	7.57075		7.57075	-52.9766	-55.7288
2012-11-05 06:19:39	52.14	54.83	41218.3	7.5777		7.5777	-53.1498	-55.8919
2012-11-05 06:29:39	52.28	54.98	41218.3	7.58464	41218.3	7.58464	-53.2926	-56.0449
2012-11-05 06:39:39	52.47	55.15	41218.3	7.59159		7.59159	-53.4862	-56.2181
2012-11-05 06:49:39	52.66	55.33	41218.3	7.59853		7.59853	-53.6799	-56.4016
2012-11-05 06:59:39	52.8	55.5	41218.3	7.60547		7.60547	-53.8226	-56.5749
2012-11-05 07:09:39	52.96	55.67	41218.3	7.61242		7.61242	-53.9857	-56.7482
2012-11-05 07:19:39	53.12	55.83	41218.3	7.61936		7.61936	-54.1488	-56.9113
2012-11-05 07:29:39	53.32	56.02	41218.3	7.62631	41218.3	7.62631	-54.3527	-57.105
2012-11-05 07:39:39	53.46	56.17	41218.3	7.63325		7.63325	-54.4954	-57.2579
2012-11-05 07:49:39	53.63	56.29	41218.3	7.6402		7.6402	-54.6687	-57.3802
2012-11-05 07:59:39	53.79	56.52	41218.3	7.64714		7.64714	-54.8318	-57.6147
2012-11-05 08:09:39	54.01	56.73	41218.3	7.65409		7.65409	-55.0561	-57.8287
2012-11-05 08:19:39	54.19	56.88	41218.3	7.66103		7.66103	-55.2396	-57.9817
2012-11-05 08:29:39	54.33	56.97	41218.4	7.66797	41218.4	7.66797	-55.3823	-58.0734
2012-11-05 08:39:39	54.49	57.22	41218.4	7.67492		7.67492	-55.5454	-58.3282
2012-11-05 08:49:39	54.66	57.35	41218.4	7.68186		7.68186	-55.7187	-58.4608
2012-11-05 08:59:39	54.83	57.51	41218.4	7.68881		7.68881	-55.8919	-58.6239
2012-11-05 09:09:39	54.99	57.7	41218.4	7.69575		7.69575	-56.055	-58.8175
2012-11-05 09:19:39	55.13	57.84	41218.4	7.7027		7.7027	-56.1978	-58.9602
2012-11-05 09:29:39	55.32	58.02	41218.4	7.70964	41218.4	7.70964	-56.3914	-59.1437
2012-11-05 09:39:39	55.49	58.22	41218.4	7.71659		7.71659	-56.5647	-59.3476
2012-11-05 09:49:39	55.65	58.36	41218.4	7.72353		7.72353	-56.7278	-59.4903
2012-11-05 09:59:39	55.78	58.52	41218.4	7.73047		7.73047	-56.8603	-59.6534
2012-11-05 10:09:39	55.97	58.7	41218.4	7.73742		7.73742	-57.054	-59.8369
2012-11-05 10:19:39	56.16	58.85	41218.4	7.74436		7.74436	-57.2477	-59.9898
2012-11-05 10:29:39	56.31	59	41218.4	7.75131	41218.4	7.75131	-57.4006	-60.1427
2012-11-05 10:39:39	56.49	59.19	41218.4	7.75825		7.75825	-57.5841	-60.3364
2012-11-05 10:49:39	56.71	59.4	41218.5	7.7652		7.7652	-57.8084	-60.5505
2012-11-05 10:59:39	56.89	59.61	41218.5	7.77214		7.77214	-57.9918	-60.7645
2012-11-05 11:09:39	57.04	59.75	41218.5	7.77909		7.77909	-58.1448	-60.9072
2012-11-05 11:19:39	57.23	59.93	41218.5	7.78603		7.78603	-58.3384	-61.0907
2012-11-05 11:29:39	57.39	60.11	41218.5	7.79297	41218.5	7.79297	-58.5015	-61.2742
2012-11-05 11:39:39	57.56	60.28	41218.5	7.79992		7.79992	-58.6748	-61.4475
2012-11-05 11:49:39	57.78	60.47	41218.5	7.80686		7.80686	-58.8991	-61.6412
2012-11-05 11:59:39	57.94	60.65	41218.5	7.81381		7.81381	-59.0622	-61.8247
2012-11-05 12:09:39	58.15	60.86	41218.5	7.82075		7.82075	-59.2762	-62.0387
2012-11-05 12:19:39	58.34	61.09	41218.5	7.8277		7.8277	-59.4699	-62.2732
2012-11-05 12:29:39	58.54	61.27	41218.5	7.83464	41218.5	7.83464	-59.6738	-62.4567
2012-11-05 12:39:39	58.79	61.5	41218.5	7.84159		7.84159	-59.9286	-62.6911
2012-11-05 12:49:39	58.99	61.72	41218.5	7.84853		7.84853	-60.1325	-62.9154
2012-11-05 12:59:39	59.21	61.9	41218.5	7.85547		7.85547	-60.3568	-63.0989
2012-11-05 13:09:39	59.44	62.13	41218.5	7.86242		7.86242	-60.5912	-63.3333
2012-11-05 13:19:39	59.65	62.35	41218.6	7.86936		7.86936	-60.8053	-63.5576
2012-11-05 13:29:39	59.83	62.54	41218.6	7.87631	41218.6	7.87631	-60.9888	-63.7513
2012-11-05 13:39:39	60.01	62.75	41218.6	7.88325		7.88325	-61.1723	-63.9653
2012-11-05 13:49:39	60.27	62.96	41218.6	7.8902		7.8902	-61.4373	-64.1794
2012-11-05 13:59:39	60.47	63.17	41218.6	7.89714		7.89714	-61.6412	-64.3935
2012-11-05 14:09:39	60.62	63.37	41218.6	7.90409		7.90409	-61.7941	-64.5973
2012-11-05 14:19:39	60.84	63.56	41218.6	7.91103		7.91103	-62.0183	-64.791
2012-11-05 14:29:39	61.03	63.72	41218.6	7.91797	41218.6	7.91797	-62.212	-64.9541
2012-11-05 14:39:39	61.23	63.95	41218.6	7.92492		7.92492	-62.4159	-65.1886
2012-11-05 14:49:39	61.45	64.17	41218.6	7.93186		7.93186	-62.6402	-65.4128
2012-11-05 14:59:39	61.65	64.38	41218.6	7.93881		7.93881	-62.844	-65.6269
2012-11-05 15:09:39	61.84	64.55	41218.6	7.94575		7.94575	-63.0377	-65.8002
2012-11-05 15:19:39	62.83	64.41	41218.6	7.9527		7.9527	-64.0469	-65.6575
2012-11-05 15:29:39	62.08	64.8	41218.6	7.95964	41218.6	7.95964	-63.2824	-66.055
2012-11-05 15:39:39	62.25	65	41218.7	7.96659		7.96659	-63.4557	-66.2589
2012-11-05 15:49:39	62.57	65.26	41218.7	7.97353		7.97353	-63.7819	-66.524
2012-11-05 15:59:39	62.78	65.5	41218.7	7.98047		7.98047	-63.9959	-66.7686
2012-11-05 16:09:39	62.99	65.67	41218.7	7.98742		7.98742	-64.21	-66.9419
2012-11-05 16:19:39	63.17	65.89	41218.7	7.99436		7.99436	-64.3935	-67.1662
2012-11-05 16:29:39	63.42	66.11	41218.7	8.00131	41218.7	8.00131	-64.6483	-67.3904
2012-11-05 16:39:39	63.62	66.35	41218.7	8.00825		8.00825	-64.8522	-67.6351
2012-11-05 16:49:39	63.86	66.54	41218.7	8.0152		8.0152	-65.0968	-67.8287
2012-11-05 16:59:39	64.11	66.79	41218.7	8.02214		8.02214	-65.3517	-68.0836
2012-11-05 17:09:39	64.34	67.03	41218.7	8.02909		8.02909	-65.5861	-68.3282
2012-11-05 17:19:39	64.54	67.27	41218.7	8.03603		8.03603	-65.79	-68.5729
2012-11-05 17:29:39	64.78	67.48	41218.7	8.04297	41218.7	8.04297	-66.0347	-68.787
2012-11-05 17:39:39	65.01	67.72	41218.7	8.04992		8.04992	-66.2691	-69.0316
2012-11-05 17:49:39	65.25	67.96	41218.7	8.05686		8.05686	-66.5138	-69.2762
2012-11-05 17:59:39	65.49	68.2	41218.7	8.06381		8.06381	-66.7584	-69.5209
2012-11-05 18:09:39	65.7	68.4	41218.8	8.07075		8.07075	-66.9725	-69.7248
2012-11-05 18:19:39	65.91	68.64	41218.8	8.0777		8.0777	-67.1865	-69.9694
2012-11-05 18:29:39	66.12	68.85	41218.8	8.08464	41218.8	8.08464	-67.4006	-70.1835
2012-11-05 18:39:39	66.37	69.1	41218.8	8.09159		8.09159	-67.6555	-70.4383
2012-11-05 18:49:39	66.57	69.3	41218.8	8.09853		8.09853	-67.8593	-70.6422
2012-11-05 18:59:39	66.79	69.51	41218.8	8.10547		8.10547	-68.0836	-70.8563
2012-11-05 19:09:39	67.05	69.75	41218.8	8.11242		8.11242	-68.3486	-71.1009
2012-11-05 19:19:39	67.29	70.03	41218.8	8.11936		8.11936	-68.5933	-71.3863
2012-11-05 19:29:39	67.55	70.28	41218.8	8.12631	41218.8	8.12631	-68.8583	-71.6412
2012-11-05 19:39:39	67.75	70.49	41218.8	8.13325		8.13325	-69.0622	-71.8552
2012-11-05 19:49:39	67.97	70.7	41218.8	8.1402		8.1402	-69.2864	-72.0693
2012-11-05 19:59:39	68.21	70.91	41218.8	8.14714		8.14714	-69.5311	-72.2834
2012-11-05 20:09:39	68.38	71.17	41218.8	8.15409		8.15409	-69.7044	-72.5484
2012-11-05 20:19:39	68.6	71.37	41218.8	8.16103		8.16103	-69.9286	-72.7523
2012-11-05 20:29:39	68.84	71.6	41218.9	8.16797	41218.9	8.16797	-70.1733	-72.9867
2012-11-05 20:39:39	69.08	71.77	41218.9	8.17492		8.17492	-70.4179	-73.16
2012-11-05 20:49:39	69.29	72.05	41218.9	8.18186		8.18186	-70.632	-73.4455
2012-11-05 20:59:39	69.49	72.26	41218.9	8.18881		8.18881	-70.8359	-73.6595
2012-11-05 21:09:39	69.74	72.48	41218.9	8.19575		8.19575	-71.0907	-73.8838
2012-11-05 21:19:39	69.96	72.72	41218.9	8.2027		8.2027	-71.315	-74.1284
2012-11-05 21:29:39	70.22	72.97	41218.9	8.20964	41218.9	8.20964	-71.58	-74.3833
2012-11-05 21:39:39	70.44	73.19	41218.9	8.21659		8.21659	-71.8043	-74.6075
2012-11-05 21:49:39	70.67	73.42	41218.9	8.22353		8.22353	-72.0387	-74.842
2012-11-05 21:59:39	70.88	73.66	41218.9	8.23047		8.23047	-72.2528	-75.0866
2012-11-05 22:09:39	71.12	73.86	41218.9	8.23742		8.23742	-72.4975	-75.2905
2012-11-05 22:19:39	71.35	74.13	41218.9	8.24436		8.24436	-72.7319	-75.5657
2012-11-05 22:29:39	71.57	74.31	41218.9	8.25131	41218.9	8.25131	-72.9562	-75.7492
2012-11-05 22:39:39	71.76	74.53	41218.9	8.25825		8.25825	-73.1498	-75.9735
2012-11-05 22:49:39	72.01	74.77	41219	8.2652		8.2652	-73.4047	-76.2181
2012-11-05 22:59:39	72.21	74.99	41219	8.27214		8.27214	-73.6086	-76.4424
2012-11-05 23:09:39	72.45	75.2	41219	8.27909		8.27909	-73.8532	-76.6565
2012-11-05 23:19:39	72.65	75.41	41219	8.28603		8.28603	-74.0571	-76.8705
2012-11-05 23:29:39	72.89	75.66	41219	8.29297	41219	8.29297	-74.3017	-77.1254
2012-11-05 23:39:39	73.07	75.86	41219	8.29992		8.29992	-74.4852	-77.3293
2012-11-05 23:49:39	73.35	76.13	41219	8.30686		8.30686	-74.7706	-77.6045
2012-11-05 23:59:39	73.54	76.34	41219	8.31381		8.31381	-74.9643	-77.8186
2012-11-06 00:09:39	73.79	76.57	41219	8.32075		8.32075	-75.2192	-78.053
2012-11-06 00:19:39	74.01	76.81	41219	8.3277		8.3277	-75.4434	-78.2977
2012-11-06 00:29:39	74.25	77.03	41219	8.33464	41219	8.33464	-75.6881	-78.5219
2012-11-06 00:39:39	74.49	77.29	41219	8.34159		8.34159	-75.9327	-78.787
2012-11-06 00:49:39	74.74	77.51	41219	8.34853		8.34853	-76.1876	-79.0112
2012-11-06 00:59:39	74.95	77.73	41219	8.35547		8.35547	-76.4016	-79.2355
2012-11-06 01:09:39	75.17	77.96	41219	8.36242		8.36242	-76.6259	-79.4699
2012-11-06 01:19:39	75.42	78.2	41219.1	8.36936		8.36936	-76.8807	-79.7146
2012-11-06 01:29:39	75.65	78.45	41219.1	8.37631	41219.1	8.37631	-77.1152	-79.9694
2012-11-06 01:39:39	75.87	78.67	41219.1	8.38325		8.38325	-77.3394	-80.1937
2012-11-06 01:49:39	76.1	78.93	41219.1	8.3902		8.3902	-77.5739	-80.4587
2012-11-06 01:59:39	76.35	79.15	41219.1	8.39714		8.39714	-77.8287	-80.683
2012-11-06 02:09:39	76.6	79.4	41219.1	8.40409		8.40409	-78.0836	-80.9378
2012-11-06 02:19:39	76.84	79.64	41219.1	8.41103		8.41103	-78.3282	-81.1825
2012-11-06 02:29:39	77.05	79.86	41219.1	8.41797	41219.1	8.41797	-78.5423	-81.4067
2012-11-06 02:39:39	77.31	80.12	41219.1	8.42492		8.42492	-78.8073	-81.6718
2012-11-06 02:49:39	77.54	80.35	41219.1	8.43186		8.43186	-79.0418	-81.9062
2012-11-06 02:59:39	77.78	80.6	41219.1	8.43881		8.43881	-79.2864	-82.1611
2012-11-06 03:09:39	78.04	80.85	41219.1	8.44575		8.44575	-79.5515	-82.4159
2012-11-06 03:19:39	78.3	81.11	41219.1	8.4527		8.4527	-79.8165	-82.6809
2012-11-06 03:29:39	78.54	81.35	41219.1	8.45964	41219.1	8.45964	-80.0612	-82.9256
2012-11-06 03:39:39	78.78	81.58	41219.2	8.46659		8.46659	-80.3058	-83.16
2012-11-06 03:49:39	79.04	81.87	41219.2	8.47353		8.47353	-80.5708	-83.4557
2012-11-06 03:59:39	79.28	82.1	41219.2	8.48047		8.48047	-80.8155	-83.6901
2012-11-06 04:09:39	79.45	82.34	41219.2	8.48742		8.48742	-80.9888	-83.9348
2012-11-06 04:19:39	79.73	82.54	41219.2	8.49436		8.49436	-81.2742	-84.1386
2012-11-06 04:29:39	79.96	82.78	41219.2	8.50131	41219.2	8.50131	-81.5087	-84.3833
2012-11-06 04:39:39	80.22	83.02	41219.2	8.50825		8.50825	-81.7737	-84.6279
2012-11-06 04:49:39	80.43	83.25	41219.2	8.5152		8.5152	-81.9878	-84.8624
2012-11-06 04:59:39	80.64	83.48	41219.2	8.52214		8.52214	-82.2018	-85.0968
2012-11-06 05:09:39	80.91	83.74	41219.2	8.52909		8.52909	-82.4771	-85.3619
2012-11-06 05:19:39	81.15	83.98	41219.2	8.53603		8.53603	-82.7217	-85.6065
2012-11-06 05:29:39	81.39	84.23	41219.2	8.54297	41219.2	8.54297	-82.9664	-85.8614
2012-11-06 05:39:39	81.65	84.49	41219.2	8.54992		8.54992	-83.2314	-86.1264
2012-11-06 05:49:39	81.88	84.72	41219.2	8.55686		8.55686	-83.4659	-86.3609
2012-11-06 05:59:39	82.14	84.97	41219.2	8.56381		8.56381	-83.7309	-86.6157
2012-11-06 06:09:39	82.38	85.23	41219.3	8.57075		8.57075	-83.9755	-86.8807
2012-11-06 06:19:39	82.62	85.46	41219.3	8.5777		8.5777	-84.2202	-87.1152
2012-11-06 06:29:39	82.86	85.71	41219.3	8.58464	41219.3	8.58464	-84.4648	-87.37
2012-11-06 06:39:39	83.11	85.94	41219.3	8.59159		8.59159	-84.7197	-87.6045
2012-11-06 06:49:39	83.35	86.2	41219.3	8.59853		8.59853	-84.9643	-87.8695
2012-11-06 06:59:39	83.6	86.45	41219.3	8.60547		8.60547	-85.2192	-88.1244
2012-11-06 07:09:39	83.82	86.69	41219.3	8.61242		8.61242	-85.4434	-88.369
2012-11-06 07:19:39	84.07	86.94	41219.3	8.61936		8.61936	-85.6983	-88.6239
2012-11-06 07:29:39	84.35	87.2	41219.3	8.62631	41219.3	8.62631	-85.9837	-88.8889
2012-11-06 07:39:39	84.57	87.43	41219.3	8.63325		8.63325	-86.208	-89.1233
2012-11-06 07:49:39	84.8	87.68	41219.3	8.6402		8.6402	-86.4424	-89.3782
2012-11-06 07:59:39	85.07	87.94	41219.3	8.64714		8.64714	-86.7176	-89.6432
2012-11-06 08:09:39	85.32	88.2	41219.3	8.65409		8.65409	-86.9725	-89.9083
2012-11-06 08:19:39	85.54	88.44	41219.3	8.66103		8.66103	-87.1967	-90.1529
2012-11-06 08:29:39	85.82	88.68	41219.4	8.66797	41219.4	8.66797	-87.4822	-90.3976
2012-11-06 08:39:39	86.03	88.92	41219.4	8.67492		8.67492	-87.6962	-90.6422
2012-11-06 08:49:39	86.29	89.18	41219.4	8.68186		8.68186	-87.9613	-90.9072
2012-11-06 08:59:39	86.56	89.42	41219.4	8.68881		8.68881	-88.2365	-91.1519
2012-11-06 09:09:39	86.78	89.62	41219.4	8.69575		8.69575	-88.4608	-91.3558
2012-11-06 09:19:39	86.99	89.87	41219.4	8.7027		8.7027	-88.6748	-91.6106
2012-11-06 09:29:39	87.24	90.13	41219.4	8.70964	41219.4	8.70964	-88.9297	-91.8756
2012-11-06 09:39:39	87.44	90.39	41219.4	8.71659		8.71659	-89.1335	-92.1407
2012-11-06 09:49:39	87.71	90.6	41219.4	8.72353		8.72353	-89.4088	-92.3547
2012-11-06 09:59:39	87.97	90.86	41219.4	8.73047		8.73047	-89.6738	-92.6198
2012-11-06 10:09:39	88.23	91.12	41219.4	8.73742		8.73742	-89.9388	-92.8848
2012-11-06 10:19:39	88.5	91.36	41219.4	8.74436		8.74436	-90.2141	-93.1295
2012-11-06 10:29:39	88.77	91.62	41219.4	8.75131	41219.4	8.75131	-90.4893	-93.3945
2012-11-06 10:39:39	89.01	91.88	41219.4	8.75825		8.75825	-90.7339	-93.6595
2012-11-06 10:49:39	89.25	92.16	41219.5	8.7652		8.7652	-90.9786	-93.945
2012-11-06 10:59:39	89.5	92.39	41219.5	8.77214		8.77214	-91.2334	-94.1794
2012-11-06 11:09:39	89.71	92.58	41219.5	8.77909		8.77909	-91.4475	-94.3731
2012-11-06 11:19:39	89.96	92.86	41219.5	8.78603		8.78603	-91.7023	-94.6585
2012-11-06 11:29:39	90.19	93.19	41219.5	8.79297	41219.5	8.79297	-91.9368	-94.9949
2012-11-06 11:39:39	90.47	93.39	41219.5	8.79992		8.79992	-92.2222	-95.1988
2012-11-06 11:49:39	90.71	93.66	41219.5	8.80686		8.80686	-92.4669	-95.474
2012-11-06 11:59:39	90.95	93.92	41219.5	8.81381		8.81381	-92.7115	-95.739
2012-11-06 12:09:39	91.25	94.21	41219.5	8.82075		8.82075	-93.0173	-96.0347
2012-11-06 12:19:39	91.51	94.45	41219.5	8.8277		8.8277	-93.2824	-96.2793
2012-11-06 12:29:39	91.77	94.65	41219.5	8.83464	41219.5	8.83464	-93.5474	-96.4832
2012-11-06 12:39:39	92.03	94.96	41219.5	8.84159		8.84159	-93.8124	-96.7992
2012-11-06 12:49:39	92.3	95.26	41219.5	8.84853		8.84853	-94.0877	-97.105
2012-11-06 12:59:39	92.57	95.54	41219.5	8.85547		8.85547	-94.3629	-97.3904
2012-11-06 13:09:39	92.85	95.78	41219.5	8.86242		8.86242	-94.6483	-97.6351
2012-11-06 13:19:39	93.08	96.06	41219.6	8.86936		8.86936	-94.8828	-97.9205
2012-11-06 13:29:39	93.35	96.33	41219.6	8.87631	41219.6	8.87631	-95.158	-98.1957
2012-11-06 13:39:39	93.59	96.58	41219.6	8.88325		8.88325	-95.4027	-98.4506
2012-11-06 13:49:39	93.8	96.8	41219.6	8.8902		8.8902	-95.6167	-98.6748
2012-11-06 13:59:39	94.07	97.05	41219.6	8.89714		8.89714	-95.8919	-98.9297
2012-11-06 14:09:39	94.37	97.35	41219.6	8.90409		8.90409	-96.1978	-99.2355
2012-11-06 14:19:39	94.57	97.59	41219.6	8.91103		8.91103	-96.4016	-99.4801
2012-11-06 14:29:39	94.88	97.89	41219.6	8.91797	41219.6	8.91797	-96.7176	-99.7859
2012-11-06 14:39:39	95.13	98.11	41219.6	8.92492		8.92492	-96.9725	-100.01
2012-11-06 14:49:39	95.38	98.37	41219.6	8.93186		8.93186	-97.2273	-100.275
2012-11-06 14:59:39	95.66	98.68	41219.6	8.93881		8.93881	-97.5127	-100.591
2012-11-06 15:09:39	95.92	98.92	41219.6	8.94575		8.94575	-97.7778	-100.836
2012-11-06 15:19:39	96.17	99.17	41219.6	8.9527		8.9527	-98.0326	-101.091
2012-11-06 15:29:39	96.42	99.42	41219.6	8.95964	41219.6	8.95964	-98.2875	-101.346
2012-11-06 15:39:39	96.69	99.7	41219.7	8.96659		8.96659	-98.5627	-101.631
2012-11-06 15:49:39	96.97	99.98	41219.7	8.97353		8.97353	-98.8481	-101.916
2012-11-06 15:59:39	97.22	100.23	41219.7	8.98047		8.98047	-99.103	-102.171
2012-11-06 16:09:39	97.47	100.52	41219.7	8.98742		8.98742	-99.3578	-102.467
2012-11-06 16:19:39	97.78	100.8	41219.7	8.99436		8.99436	-99.6738	-102.752
2012-11-06 16:29:39	98.07	101.12	41219.7	9.00131	41219.7	9.00131	-99.9694	-103.078
2012-11-06 16:39:39	98.34	101.39	41219.7	9.00825		9.00825	-100.245	-103.354
2012-11-06 16:49:39	98.25	101.32	41219.7	9.0152		9.0152	-100.153	-103.282
2012-11-06 16:59:39	98.67	101.8	41219.7	9.02214		9.02214	-100.581	-103.772
2012-11-06 17:09:39	99.05	102.17	41219.7	9.02909		9.02909	-100.968	-104.149
2012-11-06 17:19:39	99.37	102.49	41219.7	9.03603		9.03603	-101.295	-104.475
2012-11-06 17:29:39	99.69	102.78	41219.7	9.04297	41219.7	9.04297	-101.621	-104.771
2012-11-06 17:39:39	99.98	103.04	41219.7	9.04992		9.04992	-101.916	-105.036
2012-11-06 17:49:39	100.29	103.32	41219.7	9.05686		9.05686	-102.232	-105.321
2012-11-06 17:59:39	100.57	103.64	41219.7	9.06381		9.06381	-102.518	-105.647
2012-11-06 18:09:39	100.88	103.92	41219.8	9.07075		9.07075	-102.834	-105.933
2012-11-06 18:19:39	101.19	104.23	41219.8	9.0777		9.0777	-103.15	-106.249
2012-11-06 18:29:39	101.45	104.49	41219.8	9.08464	41219.8	9.08464	-103.415	-106.514
2012-11-06 18:39:39	101.68	104.8	41219.8	9.09159		9.09159	-103.649	-106.83
2012-11-06 18:49:39	102.06	105.1	41219.8	9.09853		9.09853	-104.037	-107.136
2012-11-06 18:59:39	102.35	105.42	41219.8	9.10547		9.10547	-104.332	-107.462
2012-11-06 19:09:39	102.67	105.73	41219.8	9.11242		9.11242	-104.659	-107.778
2012-11-06 19:19:39	102.96	106.04	41219.8	9.11936		9.11936	-104.954	-108.094
2012-11-06 19:29:39	103.3	106.36	41219.8	9.12631	41219.8	9.12631	-105.301	-108.42
2012-11-06 19:39:39	103.61	106.67	41219.8	9.13325		9.13325	-105.617	-108.736
2012-11-06 19:49:39	103.9	106.98	41219.8	9.1402		9.1402	-105.912	-109.052
2012-11-06 19:59:39	104.2	107.29	41219.8	9.14714		9.14714	-106.218	-109.368
2012-11-06 20:09:39	104.54	107.63	41219.8	9.15409		9.15409	-106.565	-109.715
2012-11-06 20:19:39	104.83	107.93	41219.8	9.16103		9.16103	-106.86	-110.02
2012-11-06 20:29:39	105.18	108.28	41219.9	9.16797	41219.9	9.16797	-107.217	-110.377
2012-11-06 20:39:39	105.47	108.59	41219.9	9.17492		9.17492	-107.513	-110.693
2012-11-06 20:49:39	105.79	108.9	41219.9	9.18186		9.18186	-107.839	-111.009
2012-11-06 20:59:39	106.06	109.21	41219.9	9.18881		9.18881	-108.114	-111.325
2012-11-06 21:09:39	106.45	109.53	41219.9	9.19575		9.19575	-108.512	-111.651
2012-11-06 21:19:39	106.75	109.83	41219.9	9.2027		9.2027	-108.818	-111.957
2012-11-06 21:29:39	107.08	110.16	41219.9	9.20964	41219.9	9.20964	-109.154	-112.294
2012-11-06 21:39:39	107.38	110.45	41219.9	9.21659		9.21659	-109.46	-112.589
2012-11-06 21:49:39	107.67	110.77	41219.9	9.22353		9.22353	-109.755	-112.915
2012-11-06 21:59:39	107.91	111.06	41219.9	9.23047		9.23047	-110	-113.211
2012-11-06 22:09:39	108.23	111.35	41219.9	9.23742		9.23742	-110.326	-113.507
2012-11-06 22:19:39	108.57	111.67	41219.9	9.24436		9.24436	-110.673	-113.833
2012-11-06 22:29:39	108.83	111.99	41219.9	9.25131	41219.9	9.25131	-110.938	-114.159
2012-11-06 22:39:39	109.15	112.3	41219.9	9.25825		9.25825	-111.264	-114.475
2012-11-06 22:49:39	109.48	112.63	41220	9.2652		9.2652	-111.6	-114.811
2012-11-06 22:59:39	109.76	112.92	41220	9.27214		9.27214	-111.886	-115.107
2012-11-06 23:09:39	110.11	113.25	41220	9.27909		9.27909	-112.243	-115.443
2012-11-06 23:19:39	110.41	113.57	41220	9.28603		9.28603	-112.548	-115.77
2012-11-06 23:29:39	110.73	113.89	41220	9.29297	41220	9.29297	-112.875	-116.096
2012-11-06 23:39:39	111.06	114.21	41220	9.29992		9.29992	-113.211	-116.422
2012-11-06 23:49:39	111.35	114.51	41220	9.30686		9.30686	-113.507	-116.728
2012-11-06 23:59:39	111.66	114.84	41220	9.31381		9.31381	-113.823	-117.064
2012-11-07 00:09:39	111.98	115.19	41220	9.32075		9.32075	-114.149	-117.421
2012-11-07 00:19:39	112.24	115.43	41220	9.3277		9.3277	-114.414	-117.666
2012-11-07 00:29:39	112.58	115.71	41220	9.33464	41220	9.33464	-114.76	-117.951
2012-11-07 00:39:39	112.85	116.03	41220	9.34159		9.34159	-115.036	-118.277
2012-11-07 00:49:39	113.12	116.32	41220	9.34853		9.34853	-115.311	-118.573
2012-11-07 00:59:39	113.46	116.61	41220	9.35547		9.35547	-115.657	-118.869
2012-11-07 01:09:39	113.75	116.82	41220	9.36242		9.36242	-115.953	-119.083
2012-11-07 01:19:39	113.97	117.14	41220.1	9.36936		9.36936	-116.177	-119.409
2012-11-07 01:29:39	114.26	117.41	41220.1	9.37631	41220.1	9.37631	-116.473	-119.684
2012-11-07 01:39:39	114.56	117.61	41220.1	9.38325		9.38325	-116.779	-119.888
2012-11-07 01:49:39	114.82	118.02	41220.1	9.3902		9.3902	-117.044	-120.306
2012-11-07 01:59:39	115.08	118.28	41220.1	9.39714		9.39714	-117.309	-120.571
2012-11-07 02:09:39	115.4	118.61	41220.1	9.40409		9.40409	-117.635	-120.907
2012-11-07 02:19:39	115.7	118.85	41220.1	9.41103		9.41103	-117.941	-121.152
2012-11-07 02:29:39	116	119.19	41220.1	9.41797	41220.1	9.41797	-118.247	-121.498
2012-11-07 02:39:39	116.25	119.48	41220.1	9.42492		9.42492	-118.502	-121.794
2012-11-07 02:49:39	116.56	119.78	41220.1	9.43186		9.43186	-118.818	-122.1
2012-11-07 02:59:39	116.88	120.12	41220.1	9.43881		9.43881	-119.144	-122.446
2012-11-07 03:09:39	117.18	120.44	41220.1	9.44575		9.44575	-119.45	-122.773
2012-11-07 03:19:39	117.5	120.77	41220.1	9.4527		9.4527	-119.776	-123.109
2012-11-07 03:29:39	117.78	121.06	41220.1	9.45964	41220.1	9.45964	-120.061	-123.405
2012-11-07 03:39:39	118.17	121.4	41220.2	9.46659		9.46659	-120.459	-123.751
2012-11-07 03:49:39	118.46	121.77	41220.2	9.47353		9.47353	-120.754	-124.128
2012-11-07 03:59:39	118.77	122.03	41220.2	9.48047		9.48047	-121.07	-124.393
2012-11-07 04:09:39	119.04	122.37	41220.2	9.48742		9.48742	-121.346	-124.74
2012-11-07 04:19:39	119.33	122.65	41220.2	9.49436		9.49436	-121.641	-125.025
2012-11-07 04:29:39	119.69	122.94	41220.2	9.50131	41220.2	9.50131	-122.008	-125.321
2012-11-07 04:39:39	119.97	123.24	41220.2	9.50825		9.50825	-122.294	-125.627
2012-11-07 04:49:39	120.26	123.53	41220.2	9.5152		9.5152	-122.589	-125.923
2012-11-07 04:59:39	120.57	123.93	41220.2	9.52214		9.52214	-122.905	-126.33
2012-11-07 05:09:39	120.9	124.2	41220.2	9.52909		9.52909	-123.242	-126.606
2012-11-07 05:19:39	121.22	124.53	41220.2	9.53603		9.53603	-123.568	-126.942
2012-11-07 05:29:39	121.49	124.81	41220.2	9.54297	41220.2	9.54297	-123.843	-127.227
2012-11-07 05:39:39	121.8	125.1	41220.2	9.54992		9.54992	-124.159	-127.523
2012-11-07 05:49:39	122.09	125.41	41220.2	9.55686		9.55686	-124.455	-127.839
2012-11-07 05:59:39	122.38	125.69	41220.2	9.56381		9.56381	-124.75	-128.124
2012-11-07 06:09:39	122.68	126.03	41220.3	9.57075		9.57075	-125.056	-128.471
2012-11-07 06:19:39	122.98	126.31	41220.3	9.5777		9.5777	-125.362	-128.756
2012-11-07 06:29:39	123.28	126.65	41220.3	9.58464	41220.3	9.58464	-125.668	-129.103
2012-11-07 06:39:39	123.61	126.98	41220.3	9.59159		9.59159	-126.004	-129.439
2012-11-07 06:49:39	123.94	127.29	41220.3	9.59853		9.59853	-126.34	-129.755
2012-11-07 06:59:39	124.18	127.56	41220.3	9.60547		9.60547	-126.585	-130.031
2012-11-07 07:09:39	124.46	127.82	41220.3	9.61242		9.61242	-126.871	-130.296
2012-11-07 07:19:39	124.76	128.12	41220.3	9.61936		9.61936	-127.176	-130.601
2012-11-07 07:29:39	125.05	128.43	41220.3	9.62631	41220.3	9.62631	-127.472	-130.917
2012-11-07 07:39:39	125.31	128.65	41220.3	9.63325		9.63325	-127.737	-131.142
2012-11-07 07:49:39	125.61	128.97	41220.3	9.6402		9.6402	-128.043	-131.468
2012-11-07 07:59:39	125.88	129.28	41220.3	9.64714		9.64714	-128.318	-131.784
2012-11-07 08:09:39	126.12	129.55	41220.3	9.65409		9.65409	-128.563	-132.059
2012-11-07 08:19:39	126.39	129.83	41220.3	9.66103		9.66103	-128.838	-132.345
2012-11-07 08:29:39	126.68	130.07	41220.4	9.66797	41220.4	9.66797	-129.134	-132.589
2012-11-07 08:39:39	126.92	130.33	41220.4	9.67492		9.67492	-129.378	-132.854
2012-11-07 08:49:39	127.16	130.64	41220.4	9.68186		9.68186	-129.623	-133.17
2012-11-07 08:59:39	127.4	130.86	41220.4	9.68881		9.68881	-129.867	-133.394
2012-11-07 09:09:39	127.68	131.13	41220.4	9.69575		9.69575	-130.153	-133.67
2012-11-07 09:19:39	127.88	131.35	41220.4	9.7027		9.7027	-130.357	-133.894
2012-11-07 09:29:39	128.14	131.63	41220.4	9.70964	41220.4	9.70964	-130.622	-134.179
2012-11-07 09:39:39	128.4	131.83	41220.4	9.71659		9.71659	-130.887	-134.383
2012-11-07 09:49:39	128.64	132.13	41220.4	9.72353		9.72353	-131.131	-134.689
2012-11-07 09:59:39	128.93	132.4	41220.4	9.73047		9.73047	-131.427	-134.964
2012-11-07 10:09:39	129.08	132.54	41220.4	9.73742		9.73742	-131.58	-135.107
2012-11-07 10:19:39	129.35	132.81	41220.4	9.74436		9.74436	-131.855	-135.382
2012-11-07 10:29:39	129.64	133.1	41220.4	9.75131	41220.4	9.75131	-132.151	-135.678
2012-11-07 10:39:39	129.91	133.38	41220.4	9.75825		9.75825	-132.426	-135.963
2012-11-07 10:49:39	130.14	133.65	41220.5	9.7652		9.7652	-132.661	-136.239
2012-11-07 10:59:39	130.41	133.89	41220.5	9.77214		9.77214	-132.936	-136.483
2012-11-07 11:09:39	130.64	134.12	41220.5	9.77909		9.77909	-133.17	-136.718
2012-11-07 11:19:39	130.87	134.4	41220.5	9.78603		9.78603	-133.405	-137.003
2012-11-07 11:29:39	131.16	134.67	41220.5	9.79297	41220.5	9.79297	-133.7	-137.278
2012-11-07 11:39:39	131.38	134.9	41220.5	9.79992		9.79992	-133.925	-137.513
2012-11-07 11:49:39	131.65	135.2	41220.5	9.80686		9.80686	-134.2	-137.819
2012-11-07 11:59:39	131.92	135.47	41220.5	9.81381		9.81381	-134.475	-138.094
2012-11-07 12:09:39	132.3	135.84	41220.5	9.82075		9.82075	-134.862	-138.471
2012-11-07 12:19:39	132.54	136.11	41220.5	9.8277		9.8277	-135.107	-138.746
2012-11-07 12:29:39	132.82	136.37	41220.5	9.83464	41220.5	9.83464	-135.392	-139.011
2012-11-07 12:39:39	133.11	136.66	41220.5	9.84159		9.84159	-135.688	-139.307
2012-11-07 12:49:39	133.39	136.94	41220.5	9.84853		9.84853	-135.973	-139.592
2012-11-07 12:59:39	133.69	137.27	41220.5	9.85547		9.85547	-136.279	-139.929
2012-11-07 13:09:39	133.99	137.55	41220.5	9.86242		9.86242	-136.585	-140.214
2012-11-07 13:19:39	134.28	137.87	41220.6	9.86936		9.86936	-136.881	-140.54
2012-11-07 13:29:39	134.58	138.19	41220.6	9.87631	41220.6	9.87631	-137.187	-140.866
2012-11-07 13:39:39	134.91	138.51	41220.6	9.88325		9.88325	-137.523	-141.193
2012-11-07 13:49:39	135.18	138.82	41220.6	9.8902		9.8902	-137.798	-141.509
2012-11-07 13:59:39	135.49	139.11	41220.6	9.89714		9.89714	-138.114	-141.804
2012-11-07 14:09:39	135.8	139.45	41220.6	9.90409		9.90409	-138.43	-142.151
2012-11-07 14:19:39	136.05	139.69	41220.6	9.91103		9.91103	-138.685	-142.396
2012-11-07 14:29:39	136.38	140.02	41220.6	9.91797	41220.6	9.91797	-139.021	-142.732
2012-11-07 14:39:39	136.67	140.32	41220.6	9.92492		9.92492	-139.317	-143.038
2012-11-07 14:49:39	136.97	140.63	41220.6	9.93186		9.93186	-139.623	-143.354
2012-11-07 14:59:39	137.27	140.96	41220.6	9.93881		9.93881	-139.929	-143.69
2012-11-07 15:09:39	137.57	141.29	41220.6	9.94575		9.94575	-140.234	-144.027
2012-11-07 15:19:39	137.87	141.58	41220.6	9.9527		9.9527	-140.54	-144.322
2012-11-07 15:29:39	138.16	141.85	41220.6	9.95964	41220.6	9.95964	-140.836	-144.597
2012-11-07 15:39:39	138.46	142.22	41220.7	9.96659		9.96659	-141.142	-144.975
2012-11-07 15:49:39	138.77	142.5	41220.7	9.97353		9.97353	-141.458	-145.26
2012-11-07 15:59:39	139.08	142.81	41220.7	9.98047		9.98047	-141.774	-145.576
2012-11-07 16:09:39	139.34	143.1	41220.7	9.98742		9.98742	-142.039	-145.872
2012-11-07 16:19:39	139.68	143.43	41220.7	9.99436		9.99436	-142.385	-146.208
2012-11-07 16:29:39	139.97	143.68	41220.7	10.0013	41220.7	10.0013	-142.681	-146.463
2012-11-07 16:39:39	140.26	144.02	41220.7	10.0083		10.0083	-142.977	-146.809
2012-11-07 16:49:39	139.86	144	41220.7	10.0152		10.0152	-142.569	-146.789
2012-11-07 16:59:39	140.67	144.63	41220.7	10.0221		10.0221	-143.394	-147.431
2012-11-07 17:09:39	140.98	144.96	41220.7	10.0291		10.0291	-143.71	-147.768
2012-11-07 17:19:39	141.37	145.42	41220.7	10.036		10.036	-144.108	-148.236
2012-11-07 17:29:39	141.74	145.65	41220.7	10.043	41220.7	10.043	-144.485	-148.471
2012-11-07 17:39:39	142.05	145.95	41220.7	10.0499		10.0499	-144.801	-148.777
2012-11-07 17:49:39	142.4	146.24	41220.7	10.0569		10.0569	-145.158	-149.072
2012-11-07 17:59:39	142.73	146.54	41220.7	10.0638		10.0638	-145.494	-149.378
2012-11-07 18:09:39	143.04	146.85	41220.8	10.0708		10.0708	-145.81	-149.694
2012-11-07 18:19:39	143.35	147.25	41220.8	10.0777		10.0777	-146.126	-150.102
2012-11-07 18:29:39	143.68	147.52	41220.8	10.0846	41220.8	10.0846	-146.463	-150.377
2012-11-07 18:39:39	143.99	147.87	41220.8	10.0916		10.0916	-146.779	-150.734
2012-11-07 18:49:39	144.32	148.16	41220.8	10.0985		10.0985	-147.115	-151.03
2012-11-07 18:59:39	144.43	148.33	41220.8	10.1055		10.1055	-147.227	-151.203
2012-11-07 19:09:39	144.81	148.69	41220.8	10.1124		10.1124	-147.615	-151.57
2012-11-07 19:19:39	145.1	148.97	41220.8	10.1194		10.1194	-147.91	-151.855
2012-11-07 19:29:39	145.46	149.31	41220.8	10.1263	41220.8	10.1263	-148.277	-152.202
2012-11-07 19:39:39	145.81	149.68	41220.8	10.1333		10.1333	-148.634	-152.579
2012-11-07 19:49:39	146.16	149.95	41220.8	10.1402		10.1402	-148.991	-152.854
2012-11-07 19:59:39	146.49	150.27	41220.8	10.1471		10.1471	-149.327	-153.18
2012-11-07 20:09:39	146.78	150.63	41220.8	10.1541		10.1541	-149.623	-153.547
2012-11-07 20:19:39	147.09	150.95	41220.8	10.161		10.161	-149.939	-153.874
2012-11-07 20:29:39	147.41	151.32	41220.9	10.168	41220.9	10.168	-150.265	-154.251
2012-11-07 20:39:39	147.76	151.63	41220.9	10.1749		10.1749	-150.622	-154.567
2012-11-07 20:49:39	148.07	152	41220.9	10.1819		10.1819	-150.938	-154.944
2012-11-07 20:59:39	148.43	152.38	41220.9	10.1888		10.1888	-151.305	-155.331
2012-11-07 21:09:39	148.79	152.74	41220.9	10.1958		10.1958	-151.672	-155.698
2012-11-07 21:19:39	149.11	153.08	41220.9	10.2027		10.2027	-151.998	-156.045
2012-11-07 21:29:39	149.44	153.41	41220.9	10.2096	41220.9	10.2096	-152.334	-156.381
2012-11-07 21:39:39	149.77	153.72	41220.9	10.2166		10.2166	-152.671	-156.697
2012-11-07 21:49:39	150.12	154.05	41220.9	10.2235		10.2235	-153.028	-157.034
2012-11-07 21:59:39	150.44	154.4	41220.9	10.2305		10.2305	-153.354	-157.39
2012-11-07 22:09:39	150.72	154.74	41220.9	10.2374		10.2374	-153.639	-157.737
2012-11-07 22:19:39	151.09	155.06	41220.9	10.2444		10.2444	-154.016	-158.063
2012-11-07 22:29:39	151.38	155.37	41220.9	10.2513	41220.9	10.2513	-154.312	-158.379
2012-11-07 22:39:39	151.66	155.73	41220.9	10.2583		10.2583	-154.597	-158.746
2012-11-07 22:49:39	152.01	156.05	41221	10.2652		10.2652	-154.954	-159.072
2012-11-07 22:59:39	152.31	156.42	41221	10.2721		10.2721	-155.26	-159.45
2012-11-07 23:09:39	152.65	156.74	41221	10.2791		10.2791	-155.607	-159.776
2012-11-07 23:19:39	152.97	157.06	41221	10.286		10.286	-155.933	-160.102
2012-11-07 23:29:39	153.27	157.39	41221	10.293	41221	10.293	-156.239	-160.438
2012-11-07 23:39:39	153.58	157.73	41221	10.2999		10.2999	-156.555	-160.785
2012-11-07 23:49:39	153.91	158.05	41221	10.3069		10.3069	-156.891	-161.111
2012-11-07 23:59:39	154.21	158.36	41221	10.3138		10.3138	-157.197	-161.427
2012-11-08 00:09:39	154.52	158.67	41221	10.3208		10.3208	-157.513	-161.743
2012-11-08 00:19:39	154.82	159	41221	10.3277		10.3277	-157.819	-162.08
2012-11-08 00:29:39	155.13	159.33	41221	10.3346	41221	10.3346	-158.135	-162.416
2012-11-08 00:39:39	155.43	159.66	41221	10.3416		10.3416	-158.44	-162.752
2012-11-08 00:49:39	155.73	159.97	41221	10.3485		10.3485	-158.746	-163.068
2012-11-08 00:59:39	156.01	160.26	41221	10.3555		10.3555	-159.032	-163.364
2012-11-08 01:09:39	156.31	160.59	41221	10.3624		10.3624	-159.337	-163.7
2012-11-08 01:19:39	156.63	160.93	41221.1	10.3694		10.3694	-159.664	-164.047
2012-11-08 01:29:39	156.91	161.25	41221.1	10.3763	41221.1	10.3763	-159.949	-164.373
2012-11-08 01:39:39	157.21	161.54	41221.1	10.3833		10.3833	-160.255	-164.669
2012-11-08 01:49:39	157.5	161.84	41221.1	10.3902		10.3902	-160.55	-164.975
2012-11-08 01:59:39	157.81	162.16	41221.1	10.3971		10.3971	-160.866	-165.301
2012-11-08 02:09:39	158.1	162.5	41221.1	10.4041		10.4041	-161.162	-165.647
2012-11-08 02:19:39	158.39	162.8	41221.1	10.411		10.411	-161.458	-165.953
2012-11-08 02:29:39	158.7	163.13	41221.1	10.418	41221.1	10.418	-161.774	-166.29
2012-11-08 02:39:39	159	163.43	41221.1	10.4249		10.4249	-162.08	-166.595
2012-11-08 02:49:39	159.3	163.75	41221.1	10.4319		10.4319	-162.385	-166.922
2012-11-08 02:59:39	159.58	164.06	41221.1	10.4388		10.4388	-162.671	-167.238
2012-11-08 03:09:39	159.88	164.36	41221.1	10.4458		10.4458	-162.977	-167.543
2012-11-08 03:19:39	160.17	164.64	41221.1	10.4527		10.4527	-163.272	-167.829
2012-11-08 03:29:39	160.44	164.97	41221.1	10.4596	41221.1	10.4596	-163.547	-168.165
2012-11-08 03:39:39	160.75	165.27	41221.2	10.4666		10.4666	-163.863	-168.471
2012-11-08 03:49:39	161.04	165.58	41221.2	10.4735		10.4735	-164.159	-168.787
2012-11-08 03:59:39	161.27	165.86	41221.2	10.4805		10.4805	-164.393	-169.072
2012-11-08 04:09:39	161.58	166.15	41221.2	10.4874		10.4874	-164.709	-169.368
2012-11-08 04:19:39	161.89	166.45	41221.2	10.4944		10.4944	-165.025	-169.674
2012-11-08 04:29:39	162.17	166.72	41221.2	10.5013	41221.2	10.5013	-165.311	-169.949
2012-11-08 04:39:39	162.45	167	41221.2	10.5083		10.5083	-165.596	-170.234
2012-11-08 04:49:39	162.71	167.32	41221.2	10.5152		10.5152	-165.861	-170.561
2012-11-08 04:59:39	163	167.6	41221.2	10.5221		10.5221	-166.157	-170.846
2012-11-08 05:09:39	163.25	167.9	41221.2	10.5291		10.5291	-166.412	-171.152
2012-11-08 05:19:39	163.55	168.2	41221.2	10.536		10.536	-166.718	-171.458
2012-11-08 05:29:39	163.8	168.46	41221.2	10.543	41221.2	10.543	-166.972	-171.723
2012-11-08 05:39:39	164.1	168.66	41221.2	10.5499		10.5499	-167.278	-171.927
2012-11-08 05:49:39	164.33	168.97	41221.2	10.5569		10.5569	-167.513	-172.243
2012-11-08 05:59:39	164.61	169.28	41221.2	10.5638		10.5638	-167.798	-172.559
2012-11-08 06:09:39	164.86	169.57	41221.3	10.5708		10.5708	-168.053	-172.854
2012-11-08 06:19:39	165.1	169.82	41221.3	10.5777		10.5777	-168.298	-173.109
2012-11-08 06:29:39	165.37	170.14	41221.3	10.5846	41221.3	10.5846	-168.573	-173.435
2012-11-08 06:39:39	165.62	170.38	41221.3	10.5916		10.5916	-168.828	-173.68
2012-11-08 06:49:39	165.89	170.64	41221.3	10.5985		10.5985	-169.103	-173.945
2012-11-08 06:59:39	166.15	170.91	41221.3	10.6055		10.6055	-169.368	-174.22
2012-11-08 07:09:39	166.43	171.19	41221.3	10.6124		10.6124	-169.653	-174.506
2012-11-08 07:19:39	166.67	171.44	41221.3	10.6194		10.6194	-169.898	-174.76
2012-11-08 07:29:39	166.92	171.72	41221.3	10.6263	41221.3	10.6263	-170.153	-175.046
2012-11-08 07:39:39	167.16	171.96	41221.3	10.6333		10.6333	-170.398	-175.291
2012-11-08 07:49:39	167.4	172.24	41221.3	10.6402		10.6402	-170.642	-175.576
2012-11-08 07:59:39	167.63	172.5	41221.3	10.6471		10.6471	-170.877	-175.841
2012-11-08 08:09:39	167.84	172.77	41221.3	10.6541		10.6541	-171.091	-176.116
2012-11-08 08:19:39	168.11	173	41221.3	10.661		10.661	-171.366	-176.351
2012-11-08 08:29:39	168.26	173.21	41221.4	10.668	41221.4	10.668	-171.519	-176.565
2012-11-08 08:39:39	168.5	173.47	41221.4	10.6749		10.6749	-171.764	-176.83
2012-11-08 08:49:39	168.72	173.69	41221.4	10.6819		10.6819	-171.988	-177.054
2012-11-08 08:59:39	168.95	173.93	41221.4	10.6888		10.6888	-172.222	-177.299
2012-11-08 09:09:39	169.19	174.21	41221.4	10.6958		10.6958	-172.467	-177.584
2012-11-08 09:19:39	169.35	174.42	41221.4	10.7027		10.7027	-172.63	-177.798
2012-11-08 09:29:39	169.68	174.71	41221.4	10.7096	41221.4	10.7096	-172.966	-178.094
2012-11-08 09:39:39	169.88	174.93	41221.4	10.7166		10.7166	-173.17	-178.318
2012-11-08 09:49:39	170.11	175.11	41221.4	10.7235		10.7235	-173.405	-178.502
2012-11-08 09:59:39	170.31	175.38	41221.4	10.7305		10.7305	-173.609	-178.777
2012-11-08 10:09:39	170.61	175.6	41221.4	10.7374		10.7374	-173.914	-179.001
2012-11-08 10:19:39	170.83	175.85	41221.4	10.7444		10.7444	-174.139	-179.256
2012-11-08 10:29:39	171.04	176.07	41221.4	10.7513	41221.4	10.7513	-174.353	-179.48
2012-11-08 10:39:39	171.28	176.33	41221.4	10.7583		10.7583	-174.597	-179.745
2012-11-08 10:49:39	171.47	176.52	41221.5	10.7652		10.7652	-174.791	-179.939
2012-11-08 10:59:39	171.74	176.85	41221.5	10.7721		10.7721	-175.066	-180.275
2012-11-08 11:09:39	171.96	177.07	41221.5	10.7791		10.7791	-175.291	-180.499
2012-11-08 11:19:39	172.18	177.3	41221.5	10.786		10.786	-175.515	-180.734
2012-11-08 11:29:39	172.38	177.59	41221.5	10.793	41221.5	10.793	-175.719	-181.03
2012-11-08 11:39:39	172.6	177.82	41221.5	10.7999		10.7999	-175.943	-181.264
2012-11-08 11:49:39	172.84	178.05	41221.5	10.8069		10.8069	-176.188	-181.498
2012-11-08 11:59:39	173.02	178.3	41221.5	10.8138		10.8138	-176.371	-181.753
2012-11-08 12:09:39	173.29	178.52	41221.5	10.8208		10.8208	-176.646	-181.978
2012-11-08 12:19:39	173.52	178.72	41221.5	10.8277		10.8277	-176.881	-182.181
2012-11-08 12:29:39	173.7	178.99	41221.5	10.8346	41221.5	10.8346	-177.064	-182.457
2012-11-08 12:39:39	173.93	179.25	41221.5	10.8416		10.8416	-177.299	-182.722
2012-11-08 12:49:39	174.14	179.47	41221.5	10.8485		10.8485	-177.513	-182.946
2012-11-08 12:59:39	174.38	179.72	41221.5	10.8555		10.8555	-177.757	-183.201
2012-11-08 13:09:39	174.6	179.92	41221.5	10.8624		10.8624	-177.982	-183.405
2012-11-08 13:19:39	174.78	180.11	41221.6	10.8694		10.8694	-178.165	-183.598
2012-11-08 13:29:39	174.99	180.34	41221.6	10.8763	41221.6	10.8763	-178.379	-183.833
2012-11-08 13:39:39	175.2	180.58	41221.6	10.8833		10.8833	-178.593	-184.077
2012-11-08 13:49:39	175.33	180.79	41221.6	10.8902		10.8902	-178.726	-184.292
2012-11-08 13:59:39	175.56	181.03	41221.6	10.8971		10.8971	-178.96	-184.536
2012-11-08 14:09:39	175.78	181.19	41221.6	10.9041		10.9041	-179.185	-184.699
2012-11-08 14:19:39	174.27	180.28	41221.6	10.911		10.911	-177.645	-183.772
2012-11-08 14:29:39	176.05	181.68	41221.6	10.918	41221.6	10.918	-179.46	-185.199
2012-11-08 14:39:39	176.16	181.92	41221.6	10.9249		10.9249	-179.572	-185.443
2012-11-08 14:49:39	176.27	182.14	41221.6	10.9319		10.9319	-179.684	-185.668
2012-11-08 14:59:39	176.49	182.36	41221.6	10.9388		10.9388	-179.908	-185.892
2012-11-08 15:09:39	176.73	182.54	41221.6	10.9458		10.9458	-180.153	-186.075
2012-11-08 15:19:39	176.94	182.79	41221.6	10.9527		10.9527	-180.367	-186.33
2012-11-08 15:29:39	177.16	183	41221.6	10.9596	41221.6	10.9596	-180.591	-186.544
2012-11-08 15:39:39	177.37	183.26	41221.7	10.9666		10.9666	-180.805	-186.809
2012-11-08 15:49:39	177.59	183.48	41221.7	10.9735		10.9735	-181.03	-187.034
2012-11-08 15:59:39	177.79	183.71	41221.7	10.9805		10.9805	-181.233	-187.268
2012-11-08 16:09:39	178	183.94	41221.7	10.9874		10.9874	-181.448	-187.503
2012-11-08 16:19:39	178.2	184.16	41221.7	10.9944		10.9944	-181.651	-187.727
2012-11-08 16:29:39	178.38	184.41	41221.7	11.0013	41221.7	11.0013	-181.835	-187.982
2012-11-08 16:39:39	178.61	184.64	41221.7	11.0083		11.0083	-182.069	-188.216
2012-11-08 16:49:39	178.78	184.84	41221.7	11.0152		11.0152	-182.243	-188.42
2012-11-08 16:59:39	178.99	185.05	41221.7	11.0221		11.0221	-182.457	-188.634
2012-11-08 17:09:39	179.17	185.3	41221.7	11.0291		11.0291	-182.64	-188.889
2012-11-08 17:19:39	179.37	185.52	41221.7	11.036		11.036	-182.844	-189.113
2012-11-08 17:29:39	179.56	185.75	41221.7	11.043	41221.7	11.043	-183.038	-189.348
2012-11-08 17:39:39	179.75	185.94	41221.7	11.0499		11.0499	-183.231	-189.541
2012-11-08 17:49:39	179.92	186.19	41221.7	11.0569		11.0569	-183.405	-189.796
2012-11-08 17:59:39	180.08	186.35	41221.7	11.0638		11.0638	-183.568	-189.959
2012-11-08 18:09:39	180.26	186.56	41221.8	11.0708		11.0708	-183.751	-190.173
2012-11-08 18:19:39	180.39	186.75	41221.8	11.0777		11.0777	-183.884	-190.367
2012-11-08 18:29:39	180.56	186.95	41221.8	11.0846	41221.8	11.0846	-184.057	-190.571
2012-11-08 18:39:39	180.75	187.14	41221.8	11.0916		11.0916	-184.251	-190.765
2012-11-08 18:49:39	180.9	187.31	41221.8	11.0985		11.0985	-184.404	-190.938
2012-11-08 18:59:39	181.24	187.8	41221.8	11.1055		11.1055	-184.75	-191.437
2012-11-08 19:09:39	181.44	188.01	41221.8	11.1124		11.1124	-184.954	-191.651
2012-11-08 19:19:39	181.64	188.24	41221.8	11.1194		11.1194	-185.158	-191.886
2012-11-08 19:29:39	181.85	188.44	41221.8	11.1263	41221.8	11.1263	-185.372	-192.09
2012-11-08 19:39:39	182.05	188.7	41221.8	11.1333		11.1333	-185.576	-192.355
2012-11-08 19:49:39	182.24	188.95	41221.8	11.1402		11.1402	-185.77	-192.61
2012-11-08 19:59:39	182.47	189.19	41221.8	11.1471		11.1471	-186.004	-192.854
2012-11-08 20:09:39	182.66	189.46	41221.8	11.1541		11.1541	-186.198	-193.129
2012-11-08 20:19:39	182.86	189.68	41221.8	11.161		11.161	-186.402	-193.354
2012-11-08 20:29:39	183.05	189.92	41221.9	11.168	41221.9	11.168	-186.595	-193.598
2012-11-08 20:39:39	183.29	190.2	41221.9	11.1749		11.1749	-186.84	-193.884
2012-11-08 20:49:39	183.48	190.47	41221.9	11.1819		11.1819	-187.034	-194.159
2012-11-08 20:59:39	183.69	190.74	41221.9	11.1888		11.1888	-187.248	-194.434
2012-11-08 21:09:39	183.78	190.89	41221.9	11.1958		11.1958	-187.339	-194.587
2012-11-08 21:19:39	184.12	191.22	41221.9	11.2027		11.2027	-187.686	-194.924
2012-11-08 21:29:39	184.31	191.49	41221.9	11.2096	41221.9	11.2096	-187.88	-195.199
2012-11-08 21:39:39	184.46	191.76	41221.9	11.2166		11.2166	-188.033	-195.474
2012-11-08 21:49:39	184.67	191.98	41221.9	11.2235		11.2235	-188.247	-195.698
2012-11-08 21:59:39	184.87	192.27	41221.9	11.2305		11.2305	-188.451	-195.994
2012-11-08 22:09:39	185.07	192.55	41221.9	11.2374		11.2374	-188.654	-196.279
2012-11-08 22:19:39	185.28	192.82	41221.9	11.2444		11.2444	-188.869	-196.555
2012-11-08 22:29:39	185.47	193.05	41221.9	11.2513	41221.9	11.2513	-189.062	-196.789
2012-11-08 22:39:39	185.68	193.3	41221.9	11.2583		11.2583	-189.276	-197.044
2012-11-08 22:49:39	185.84	193.59	41222	11.2652		11.2652	-189.439	-197.339
2012-11-08 22:59:39	186.04	193.86	41222	11.2721		11.2721	-189.643	-197.615
2012-11-08 23:09:39	186.17	194.09	41222	11.2791		11.2791	-189.776	-197.849
2012-11-08 23:19:39	186.38	194.32	41222	11.286		11.286	-189.99	-198.084
2012-11-08 23:29:39	186.55	194.54	41222	11.293	41222	11.293	-190.163	-198.308
2012-11-08 23:39:39	186.7	194.77	41222	11.2999		11.2999	-190.316	-198.542
2012-11-08 23:49:39	186.9	195.02	41222	11.3069		11.3069	-190.52	-198.797
2012-11-08 23:59:39	187.05	195.27	41222	11.3138		11.3138	-190.673	-199.052
2012-11-09 00:09:39	187.26	195.49	41222	11.3208		11.3208	-190.887	-199.276
2012-11-09 00:19:39	187.42	195.73	41222	11.3277		11.3277	-191.05	-199.521
2012-11-09 00:29:39	187.61	195.97	41222	11.3346	41222	11.3346	-191.244	-199.766
2012-11-09 00:39:39	187.79	196.24	41222	11.3416		11.3416	-191.427	-200.041
2012-11-09 00:49:39	187.98	196.54	41222	11.3485		11.3485	-191.621	-200.347
2012-11-09 00:59:39	188.12	196.78	41222	11.3555		11.3555	-191.764	-200.591
2012-11-09 01:09:39	188.33	197.03	41222	11.3624		11.3624	-191.978	-200.846
2012-11-09 01:19:39	188.47	197.25	41222.1	11.3694		11.3694	-192.12	-201.07
2012-11-09 01:29:39	188.64	197.55	41222.1	11.3763	41222.1	11.3763	-192.294	-201.376
2012-11-09 01:39:39	188.86	197.81	41222.1	11.3833		11.3833	-192.518	-201.641
2012-11-09 01:49:39	189.05	198.06	41222.1	11.3902		11.3902	-192.712	-201.896
2012-11-09 01:59:39	189.21	198.32	41222.1	11.3971		11.3971	-192.875	-202.161
2012-11-09 02:09:39	189.37	198.6	41222.1	11.4041		11.4041	-193.038	-202.446
2012-11-09 02:19:39	189.57	198.87	41222.1	11.411		11.411	-193.242	-202.722
2012-11-09 02:29:39	189.73	199.11	41222.1	11.418	41222.1	11.418	-193.405	-202.966
2012-11-09 02:39:39	189.88	199.34	41222.1	11.4249		11.4249	-193.558	-203.201
2012-11-09 02:49:39	190.05	199.59	41222.1	11.4319		11.4319	-193.731	-203.456
2012-11-09 02:59:39	190.22	199.82	41222.1	11.4388		11.4388	-193.904	-203.69
2012-11-09 03:09:39	190.38	200.08	41222.1	11.4458		11.4458	-194.067	-203.955
2012-11-09 03:19:39	190.55	200.34	41222.1	11.4527		11.4527	-194.241	-204.22
2012-11-09 03:29:39	190.74	200.63	41222.1	11.4596	41222.1	11.4596	-194.434	-204.516
2012-11-09 03:39:39	190.9	200.89	41222.2	11.4666		11.4666	-194.597	-204.781
2012-11-09 03:49:39	191.08	201.15	41222.2	11.4735		11.4735	-194.781	-205.046
2012-11-09 03:59:39	191.26	201.43	41222.2	11.4805		11.4805	-194.964	-205.331
2012-11-09 04:09:39	191.41	201.7	41222.2	11.4874		11.4874	-195.117	-205.607
2012-11-09 04:19:39	191.61	201.93	41222.2	11.4944		11.4944	-195.321	-205.841
2012-11-09 04:29:39	191.78	202.21	41222.2	11.5013	41222.2	11.5013	-195.494	-206.126
2012-11-09 04:39:39	191.93	202.44	41222.2	11.5083		11.5083	-195.647	-206.361
2012-11-09 04:49:39	192.1	202.74	41222.2	11.5152		11.5152	-195.821	-206.667
2012-11-09 04:59:39	192.26	202.99	41222.2	11.5221		11.5221	-195.984	-206.922
2012-11-09 05:09:39	192.42	203.22	41222.2	11.5291		11.5291	-196.147	-207.156
2012-11-09 05:19:39	192.58	203.47	41222.2	11.536		11.536	-196.31	-207.411
2012-11-09 05:29:39	192.7	203.71	41222.2	11.543	41222.2	11.543	-196.432	-207.655
2012-11-09 05:39:39	192.83	203.95	41222.2	11.5499		11.5499	-196.565	-207.9
2012-11-09 05:49:39	193.04	204.25	41222.2	11.5569		11.5569	-196.779	-208.206
2012-11-09 05:59:39	193.2	204.49	41222.2	11.5638		11.5638	-196.942	-208.451
2012-11-09 06:09:39	193.36	204.75	41222.3	11.5708		11.5708	-197.105	-208.716
2012-11-09 06:19:39	193.54	204.97	41222.3	11.5777		11.5777	-197.288	-208.94
2012-11-09 06:29:39	193.64	205.29	41222.3	11.5846	41222.3	11.5846	-197.39	-209.266
2012-11-09 06:39:39	193.82	205.56	41222.3	11.5916		11.5916	-197.574	-209.541
2012-11-09 06:49:39	194	205.75	41222.3	11.5985		11.5985	-197.757	-209.735
2012-11-09 06:59:39	194.15	206.07	41222.3	11.6055		11.6055	-197.91	-210.061
2012-11-09 07:09:39	194.3	206.32	41222.3	11.6124		11.6124	-198.063	-210.316
2012-11-09 07:19:39	194.45	206.6	41222.3	11.6194		11.6194	-198.216	-210.601
2012-11-09 07:29:39	194.61	206.82	41222.3	11.6263	41222.3	11.6263	-198.379	-210.826
2012-11-09 07:39:39	194.74	207.06	41222.3	11.6333		11.6333	-198.512	-211.07
2012-11-09 07:49:39	194.83	207.22	41222.3	11.6402		11.6402	-198.603	-211.233
2012-11-09 07:59:39	194.96	207.4	41222.3	11.6471		11.6471	-198.736	-211.417
2012-11-09 08:09:39	195.03	207.56	41222.3	11.6541		11.6541	-198.807	-211.58
2012-11-09 08:19:39	195.14	207.75	41222.3	11.661		11.661	-198.919	-211.774
2012-11-09 08:29:39	195.24	207.93	41222.4	11.668	41222.4	11.668	-199.021	-211.957
2012-11-09 08:39:39	195.15	207.6	41222.4	11.6749		11.6749	-198.93	-211.621
2012-11-09 08:49:39	195.31	207.87	41222.4	11.6819		11.6819	-199.093	-211.896
2012-11-09 08:59:39	195.44	208.13	41222.4	11.6888		11.6888	-199.225	-212.161
2012-11-09 09:09:39	195.63	208.37	41222.4	11.6958		11.6958	-199.419	-212.406
2012-11-09 09:19:39	195.77	208.57	41222.4	11.7027		11.7027	-199.562	-212.61
2012-11-09 09:29:39	195.92	208.78	41222.4	11.7096	41222.4	11.7096	-199.715	-212.824
2012-11-09 09:39:39	196.03	209.04	41222.4	11.7166		11.7166	-199.827	-213.089
2012-11-09 09:49:39	196.19	209.26	41222.4	11.7235		11.7235	-199.99	-213.313
2012-11-09 09:59:39	196.31	209.43	41222.4	11.7305		11.7305	-200.112	-213.486
2012-11-09 10:09:39	196.46	209.67	41222.4	11.7374		11.7374	-200.265	-213.731
2012-11-09 10:19:39	196.59	209.9	41222.4	11.7444		11.7444	-200.398	-213.965
2012-11-09 10:29:39	196.71	210.08	41222.4	11.7513	41222.4	11.7513	-200.52	-214.149
2012-11-09 10:39:39	196.84	210.37	41222.4	11.7583		11.7583	-200.652	-214.444
2012-11-09 10:49:39	197	210.55	41222.5	11.7652		11.7652	-200.815	-214.628
2012-11-09 10:59:39	197.13	210.76	41222.5	11.7721		11.7721	-200.948	-214.842
2012-11-09 11:09:39	197.29	211.03	41222.5	11.7791		11.7791	-201.111	-215.117
2012-11-09 11:19:39	197.43	211.26	41222.5	11.786		11.786	-201.254	-215.352
2012-11-09 11:29:39	197.54	211.41	41222.5	11.793	41222.5	11.793	-201.366	-215.505
2012-11-09 11:39:39	197.7	211.67	41222.5	11.7999		11.7999	-201.529	-215.77
2012-11-09 11:49:39	197.86	211.92	41222.5	11.8069		11.8069	-201.692	-216.024
2012-11-09 11:59:39	197.9	212.18	41222.5	11.8138		11.8138	-201.733	-216.29
2012-11-09 12:09:39	198.07	212.38	41222.5	11.8208		11.8208	-201.906	-216.493
2012-11-09 12:19:39	198.2	212.62	41222.5	11.8277		11.8277	-202.039	-216.738
2012-11-09 12:29:39	198.38	212.87	41222.5	11.8346	41222.5	11.8346	-202.222	-216.993
2012-11-09 12:39:39	198.49	213.14	41222.5	11.8416		11.8416	-202.334	-217.268
2012-11-09 12:49:39	198.65	213.39	41222.5	11.8485		11.8485	-202.497	-217.523
2012-11-09 12:59:39	198.78	213.63	41222.5	11.8555		11.8555	-202.63	-217.768
2012-11-09 13:09:39	198.92	213.93	41222.5	11.8624		11.8624	-202.773	-218.073
2012-11-09 13:19:39	199.04	214.14	41222.6	11.8694		11.8694	-202.895	-218.287
2012-11-09 13:29:39	199.18	214.4	41222.6	11.8763	41222.6	11.8763	-203.038	-218.552
2012-11-09 13:39:39	199.31	214.68	41222.6	11.8833		11.8833	-203.17	-218.838
2012-11-09 13:49:39	198.82	214.36	41222.6	11.8902		11.8902	-202.671	-218.512
2012-11-09 13:59:39	198.78	214.44	41222.6	11.8971		11.8971	-202.63	-218.593
2012-11-09 14:09:39	199.37	215.25	41222.6	11.9041		11.9041	-203.231	-219.419
2012-11-09 14:19:39	199.44	215.48	41222.6	11.911		11.911	-203.303	-219.653
2012-11-09 14:29:39	199.57	215.73	41222.6	11.918	41222.6	11.918	-203.435	-219.908
2012-11-09 14:39:39	199.71	216	41222.6	11.9249		11.9249	-203.578	-220.183
2012-11-09 14:49:39	199.86	216.29	41222.6	11.9319		11.9319	-203.731	-220.479
2012-11-09 14:59:39	200.07	216.56	41222.6	11.9388		11.9388	-203.945	-220.754
2012-11-09 15:09:39	200.22	216.87	41222.6	11.9458		11.9458	-204.098	-221.07
2012-11-09 15:19:39	200.4	217.16	41222.6	11.9527		11.9527	-204.281	-221.366
2012-11-09 15:29:39	200.56	217.51	41222.6	11.9596	41222.6	11.9596	-204.444	-221.723
2012-11-09 15:39:39	200.73	217.86	41222.7	11.9666		11.9666	-204.618	-222.08
2012-11-09 15:49:39	200.9	218.21	41222.7	11.9735		11.9735	-204.791	-222.436
2012-11-09 15:59:39	201.06	218.52	41222.7	11.9805		11.9805	-204.954	-222.752
2012-11-09 16:09:39	201.22	218.87	41222.7	11.9874		11.9874	-205.117	-223.109
2012-11-09 16:19:39	201.4	219.28	41222.7	11.9944		11.9944	-205.301	-223.527
2012-11-09 16:29:39	201.59	219.6	41222.7	12.0013	41222.7	12.0013	-205.494	-223.853
2012-11-09 16:39:39	201.74	219.91	41222.7	12.0083		12.0083	-205.647	-224.169
2012-11-09 16:49:39	201.92	220.28	41222.7	12.0152		12.0152	-205.831	-224.546
2012-11-09 16:59:39	202.05	220.63	41222.7	12.0221		12.0221	-205.963	-224.903
2012-11-09 17:09:39	202.2	220.95	41222.7	12.0291		12.0291	-206.116	-225.229
2012-11-09 17:19:39	202.35	221.24	41222.7	12.036		12.036	-206.269	-225.525
2012-11-09 17:29:39	202.48	221.59	41222.7	12.043	41222.7	12.043	-206.402	-225.882
2012-11-09 17:39:39	202.59	221.88	41222.7	12.0499		12.0499	-206.514	-226.177
2012-11-09 17:49:39	202.71	222.12	41222.7	12.0569		12.0569	-206.636	-226.422
2012-11-09 17:59:39	202.8	222.49	41222.7	12.0638		12.0638	-206.728	-226.799
2012-11-09 18:09:39	202.93	222.83	41222.8	12.0708		12.0708	-206.86	-227.146
2012-11-09 18:19:39	203.08	223.09	41222.8	12.0777		12.0777	-207.013	-227.411
2012-11-09 18:29:39	203.23	223.4	41222.8	12.0846	41222.8	12.0846	-207.166	-227.727
2012-11-09 18:39:39	203.37	223.8	41222.8	12.0916		12.0916	-207.309	-228.135
2012-11-09 18:49:39	203.48	224.09	41222.8	12.0985		12.0985	-207.421	-228.43
2012-11-09 18:59:39	203.64	224.41	41222.8	12.1055		12.1055	-207.584	-228.756
2012-11-09 19:09:39	203.81	224.72	41222.8	12.1124		12.1124	-207.757	-229.072
2012-11-09 19:19:39	203.91	225.07	41222.8	12.1194		12.1194	-207.859	-229.429
2012-11-09 19:29:39	204.06	225.42	41222.8	12.1263	41222.8	12.1263	-208.012	-229.786
2012-11-09 19:39:39	204.18	225.67	41222.8	12.1333		12.1333	-208.135	-230.041
2012-11-09 19:49:39	204.34	226.07	41222.8	12.1402		12.1402	-208.298	-230.449
2012-11-09 19:59:39	204.49	226.43	41222.8	12.1471		12.1471	-208.451	-230.815
2012-11-09 20:09:39	204.64	226.81	41222.8	12.1541		12.1541	-208.603	-231.203
2012-11-09 20:19:39	204.77	227.13	41222.8	12.161		12.161	-208.736	-231.529
2012-11-09 20:29:39	204.92	227.37	41222.9	12.168	41222.9	12.168	-208.889	-231.774
2012-11-09 20:39:39	205.06	227.73	41222.9	12.1749		12.1749	-209.032	-232.141
2012-11-09 20:49:39	205.18	228.07	41222.9	12.1819		12.1819	-209.154	-232.487
2012-11-09 20:59:39	205.32	228.42	41222.9	12.1888		12.1888	-209.297	-232.844
2012-11-09 21:09:39	205.42	228.71	41222.9	12.1958		12.1958	-209.399	-233.14
2012-11-09 21:19:39	205.58	228.98	41222.9	12.2027		12.2027	-209.562	-233.415
2012-11-09 21:29:39	205.68	229.36	41222.9	12.2096	41222.9	12.2096	-209.664	-233.802
2012-11-09 21:39:39	205.81	229.74	41222.9	12.2166		12.2166	-209.796	-234.19
2012-11-09 21:49:39	205.92	230.1	41222.9	12.2235		12.2235	-209.908	-234.557
2012-11-09 21:59:39	206.06	230.46	41222.9	12.2305		12.2305	-210.051	-234.924
2012-11-09 22:09:39	206.22	230.6	41222.9	12.2374		12.2374	-210.214	-235.066
2012-11-09 22:19:39	206.33	231.12	41222.9	12.2444		12.2444	-210.326	-235.596
2012-11-09 22:29:39	206.48	231.49	41222.9	12.2513	41222.9	12.2513	-210.479	-235.973
2012-11-09 22:39:39	206.62	231.86	41222.9	12.2583		12.2583	-210.622	-236.351
2012-11-09 22:49:39	206.74	232.23	41223	12.2652		12.2652	-210.744	-236.728
2012-11-09 22:59:39	206.88	232.57	41223	12.2721		12.2721	-210.887	-237.074
2012-11-09 23:09:39	207.01	232.95	41223	12.2791		12.2791	-211.019	-237.462
2012-11-09 23:19:39	207.16	233.23	41223	12.286		12.286	-211.172	-237.747
2012-11-09 23:29:39	207.26	233.59	41223	12.293	41223	12.293	-211.274	-238.114
2012-11-09 23:39:39	207.43	233.93	41223	12.2999		12.2999	-211.448	-238.461
2012-11-09 23:49:39	207.54	234.3	41223	12.3069		12.3069	-211.56	-238.838
2012-11-09 23:59:39	207.69	234.65	41223	12.3138		12.3138	-211.713	-239.195
2012-11-10 00:09:39	207.82	235.07	41223	12.3208		12.3208	-211.845	-239.623
2012-11-10 00:19:39	207.96	235.43	41223	12.3277		12.3277	-211.988	-239.99
2012-11-10 00:29:39	208.12	235.38	41223	12.3346	41223	12.3346	-212.151	-239.939
2012-11-10 00:39:39	208.19	236.02	41223	12.3416		12.3416	-212.222	-240.591
2012-11-10 00:49:39	208.32	236.43	41223	12.3485		12.3485	-212.355	-241.009
2012-11-10 00:59:39	208.46	236.76	41223	12.3555		12.3555	-212.497	-241.346
2012-11-10 01:09:39	208.62	237.07	41223	12.3624		12.3624	-212.661	-241.662
2012-11-10 01:19:39	208.75	237.53	41223.1	12.3694		12.3694	-212.793	-242.13
2012-11-10 01:29:39	208.86	237.83	41223.1	12.3763	41223.1	12.3763	-212.905	-242.436
2012-11-10 01:39:39	208.96	238.26	41223.1	12.3833		12.3833	-213.007	-242.875
2012-11-10 01:49:39	208.94	238.54	41223.1	12.3902		12.3902	-212.987	-243.16
2012-11-10 01:59:39	209.23	238.88	41223.1	12.3971		12.3971	-213.282	-243.507
2012-11-10 02:09:39	209.37	239.19	41223.1	12.4041		12.4041	-213.425	-243.823
2012-11-10 02:19:39	209.49	239.61	41223.1	12.411		12.411	-213.547	-244.251
2012-11-10 02:29:39	209.57	240.05	41223.1	12.418	41223.1	12.418	-213.629	-244.699
2012-11-10 02:39:39	209.74	240.3	41223.1	12.4249		12.4249	-213.802	-244.954
2012-11-10 02:49:39	209.84	240.66	41223.1	12.4319		12.4319	-213.904	-245.321
2012-11-10 02:59:39	209.9	240.99	41223.1	12.4388		12.4388	-213.965	-245.657
2012-11-10 03:09:39	210.07	241.29	41223.1	12.4458		12.4458	-214.139	-245.963
2012-11-10 03:19:39	210.21	241.78	41223.1	12.4527		12.4527	-214.281	-246.463
2012-11-10 03:29:39	210.32	242.08	41223.1	12.4596	41223.1	12.4596	-214.393	-246.769
2012-11-10 03:39:39	210.46	242.48	41223.2	12.4666		12.4666	-214.536	-247.176
2012-11-10 03:49:39	210.6	242.86	41223.2	12.4735		12.4735	-214.679	-247.564
2012-11-10 03:59:39	210.73	243.27	41223.2	12.4805		12.4805	-214.811	-247.982
2012-11-10 04:09:39	210.83	243.63	41223.2	12.4874		12.4874	-214.913	-248.349
2012-11-10 04:19:39	210.94	243.96	41223.2	12.4944		12.4944	-215.025	-248.685
2012-11-10 04:29:39	211.09	244.28	41223.2	12.5013	41223.2	12.5013	-215.178	-249.011
2012-11-10 04:39:39	211.18	244.7	41223.2	12.5083		12.5083	-215.27	-249.439
2012-11-10 04:49:39	211.31	245	41223.2	12.5152		12.5152	-215.403	-249.745
2012-11-10 04:59:39	211.44	245.4	41223.2	12.5221		12.5221	-215.535	-250.153
2012-11-10 05:09:39	211.56	245.77	41223.2	12.5291		12.5291	-215.657	-250.53
2012-11-10 05:19:39	211.65	246.18	41223.2	12.536		12.536	-215.749	-250.948
2012-11-10 05:29:39	211.79	246.48	41223.2	12.543	41223.2	12.543	-215.892	-251.254
2012-11-10 05:39:39	211.92	246.85	41223.2	12.5499		12.5499	-216.024	-251.631
2012-11-10 05:49:39	212.01	247.11	41223.2	12.5569		12.5569	-216.116	-251.896
2012-11-10 05:59:39	212.17	247.51	41223.2	12.5638		12.5638	-216.279	-252.304
2012-11-10 06:09:39	212.24	247.81	41223.3	12.5708		12.5708	-216.351	-252.61
2012-11-10 06:19:39	212.39	248.26	41223.3	12.5777		12.5777	-216.504	-253.068
2012-11-10 06:29:39	212.48	248.73	41223.3	12.5846	41223.3	12.5846	-216.595	-253.547
2012-11-10 06:39:39	212.61	249.03	41223.3	12.5916		12.5916	-216.728	-253.853
2012-11-10 06:49:39	212.74	249.48	41223.3	12.5985		12.5985	-216.86	-254.312
2012-11-10 06:59:39	212.89	249.89	41223.3	12.6055		12.6055	-217.013	-254.73
2012-11-10 07:09:39	213.03	250.31	41223.3	12.6124		12.6124	-217.156	-255.158
2012-11-10 07:19:39	213.14	250.68	41223.3	12.6194		12.6194	-217.268	-255.535
2012-11-10 07:29:39	213.26	251.03	41223.3	12.6263	41223.3	12.6263	-217.39	-255.892
2012-11-10 07:39:39	213.35	251.53	41223.3	12.6333		12.6333	-217.482	-256.402
2012-11-10 07:49:39	213.46	251.82	41223.3	12.6402		12.6402	-217.594	-256.697
2012-11-10 07:59:39	213.56	252.29	41223.3	12.6471		12.6471	-217.696	-257.176
2012-11-10 08:09:39	213.7	252.7	41223.3	12.6541		12.6541	-217.839	-257.594
2012-11-10 08:19:39	213.82	253.15	41223.3	12.661		12.661	-217.961	-258.053
2012-11-10 08:29:39	213.97	253.56	41223.4	12.668	41223.4	12.668	-218.114	-258.471
2012-11-10 08:39:39	214.03	253.89	41223.4	12.6749		12.6749	-218.175	-258.807
2012-11-10 08:49:39	214.18	254.25	41223.4	12.6819		12.6819	-218.328	-259.174
2012-11-10 08:59:39	214.3	254.67	41223.4	12.6888		12.6888	-218.451	-259.602
2012-11-10 09:09:39	214.43	255.05	41223.4	12.6958		12.6958	-218.583	-259.99
2012-11-10 09:19:39	214.35	255.52	41223.4	12.7027		12.7027	-218.502	-260.469
2012-11-10 09:29:39	214.6	255.87	41223.4	12.7096	41223.4	12.7096	-218.756	-260.826
2012-11-10 09:39:39	214.77	256.26	41223.4	12.7166		12.7166	-218.93	-261.223
2012-11-10 09:49:39	214.85	256.56	41223.4	12.7235		12.7235	-219.011	-261.529
2012-11-10 09:59:39	214.96	257.13	41223.4	12.7305		12.7305	-219.123	-262.11
2012-11-10 10:09:39	215.08	257.5	41223.4	12.7374		12.7374	-219.246	-262.487
2012-11-10 10:19:39	215.19	257.79	41223.4	12.7444		12.7444	-219.358	-262.783
2012-11-10 10:29:39	215.24	258.08	41223.4	12.7513	41223.4	12.7513	-219.409	-263.078
2012-11-10 10:39:39	215.24	258.3	41223.4	12.7583		12.7583	-219.409	-263.303
2012-11-10 10:49:39	215.26	258.7	41223.5	12.7652		12.7652	-219.429	-263.71
2012-11-10 10:59:39	215.32	259.05	41223.5	12.7721		12.7721	-219.49	-264.067
2012-11-10 11:09:39	215.42	259.47	41223.5	12.7791		12.7791	-219.592	-264.495
2012-11-10 11:19:39	215.49	259.76	41223.5	12.786		12.786	-219.664	-264.791
2012-11-10 11:29:39	215.59	260.24	41223.5	12.793	41223.5	12.793	-219.766	-265.28
2012-11-10 11:39:39	215.68	260.51	41223.5	12.7999		12.7999	-219.857	-265.556
2012-11-10 11:49:39	215.8	261.03	41223.5	12.8069		12.8069	-219.98	-266.086
2012-11-10 11:59:39	215.93	261.55	41223.5	12.8138		12.8138	-220.112	-266.616
2012-11-10 12:09:39	216	261.9	41223.5	12.8208		12.8208	-220.183	-266.972
2012-11-10 12:19:39	216.16	262.34	41223.5	12.8277		12.8277	-220.347	-267.421
2012-11-10 12:29:39	216.26	262.85	41223.5	12.8346	41223.5	12.8346	-220.449	-267.941
2012-11-10 12:39:39	216.41	263.27	41223.5	12.8416		12.8416	-220.601	-268.369
2012-11-10 12:49:39	216.52	263.66	41223.5	12.8485		12.8485	-220.714	-268.767
2012-11-10 12:59:39	216.62	264.14	41223.5	12.8555		12.8555	-220.815	-269.256
2012-11-10 13:09:39	216.7	264.55	41223.5	12.8624		12.8624	-220.897	-269.674
2012-11-10 13:19:39	216.83	265.05	41223.6	12.8694		12.8694	-221.03	-270.183
2012-11-10 13:29:39	216.98	265.44	41223.6	12.8763	41223.6	12.8763	-221.182	-270.581
2012-11-10 13:39:39	217.1	265.88	41223.6	12.8833		12.8833	-221.305	-271.03
2012-11-10 13:49:39	217.18	266.35	41223.6	12.8902		12.8902	-221.386	-271.509
2012-11-10 13:59:39	217.3	266.51	41223.6	12.8971		12.8971	-221.509	-271.672
2012-11-10 14:09:39	217.39	267.16	41223.6	12.9041		12.9041	-221.6	-272.334
2012-11-10 14:19:39	217.49	267.58	41223.6	12.911		12.911	-221.702	-272.762
2012-11-10 14:29:39	217.62	268	41223.6	12.918	41223.6	12.918	-221.835	-273.191
2012-11-10 14:39:39	217.72	268.33	41223.6	12.9249		12.9249	-221.937	-273.527
2012-11-10 14:49:39	217.83	268.82	41223.6	12.9319		12.9319	-222.049	-274.027
2012-11-10 14:59:39	217.96	269.28	41223.6	12.9388		12.9388	-222.181	-274.495
2012-11-10 15:09:39	212.96	262.88	41223.6	12.9458		12.9458	-217.085	-267.971
2012-11-10 15:19:39	217.41	268.19	41223.6	12.9527		12.9527	-221.621	-273.384
2012-11-10 15:29:39	218.31	269.51	41223.6	12.9596	41223.6	12.9596	-222.538	-274.73
2012-11-10 15:39:39	218.64	270.1	41223.7	12.9666		12.9666	-222.875	-275.331
2012-11-10 15:49:39	218.48	270.62	41223.7	12.9735		12.9735	-222.712	-275.861
2012-11-10 15:59:39	218.84	271.16	41223.7	12.9805		12.9805	-223.078	-276.412
2012-11-10 16:09:39	219.17	271.74	41223.7	12.9874		12.9874	-223.415	-277.003
2012-11-10 16:19:39	219.36	272.19	41223.7	12.9944		12.9944	-223.609	-277.462
2012-11-10 16:29:39	219.57	272.81	41223.7	13.0013	41223.7	13.0013	-223.823	-278.094
2012-11-10 16:39:39	219.82	273.35	41223.7	13.0083		13.0083	-224.077	-278.644
2012-11-10 16:49:39	220	273.95	41223.7	13.0152		13.0152	-224.261	-279.256
2012-11-10 16:59:39	220.18	274.54	41223.7	13.0221		13.0221	-224.444	-279.857
2012-11-10 17:09:39	220.38	275.12	41223.7	13.0291		13.0291	-224.648	-280.449
2012-11-10 17:19:39	220.55	275.72	41223.7	13.036		13.036	-224.822	-281.06
2012-11-10 17:29:39	220.71	276.2	41223.7	13.043	41223.7	13.043	-224.985	-281.549
2012-11-10 17:39:39	220.86	276.61	41223.7	13.0499		13.0499	-225.138	-281.967
2012-11-10 17:49:39	221	277.31	41223.7	13.0569		13.0569	-225.28	-282.681
2012-11-10 17:59:39	221.15	277.84	41223.7	13.0638		13.0638	-225.433	-283.221
2012-11-10 18:09:39	221.26	278.5	41223.8	13.0708		13.0708	-225.545	-283.894
2012-11-10 18:19:39	221.44	279.01	41223.8	13.0777		13.0777	-225.729	-284.414
2012-11-10 18:29:39	221.57	279.61	41223.8	13.0846	41223.8	13.0846	-225.861	-285.025
2012-11-10 18:39:39	221.69	280.07	41223.8	13.0916		13.0916	-225.984	-285.494
2012-11-10 18:49:39	221.82	280.61	41223.8	13.0985		13.0985	-226.116	-286.045
2012-11-10 18:59:39	221.9	281.19	41223.8	13.1055		13.1055	-226.198	-286.636
2012-11-10 19:09:39	222.06	281.77	41223.8	13.1124		13.1124	-226.361	-287.227
2012-11-10 19:19:39	222.16	282.44	41223.8	13.1194		13.1194	-226.463	-287.91
2012-11-10 19:29:39	222.29	283.04	41223.8	13.1263	41223.8	13.1263	-226.595	-288.522
2012-11-10 19:39:39	221.97	283.67	41223.8	13.1333		13.1333	-226.269	-289.164
2012-11-10 19:49:39	222.46	284.15	41223.8	13.1402		13.1402	-226.769	-289.653
2012-11-10 19:59:39	222.63	284.65	41223.8	13.1471		13.1471	-226.942	-290.163
2012-11-10 20:09:39	222.79	285.26	41223.8	13.1541		13.1541	-227.105	-290.785
2012-11-10 20:19:39	222.94	285.79	41223.8	13.161		13.161	-227.258	-291.325
2012-11-10 20:29:39	223.06	286.43	41223.9	13.168	41223.9	13.168	-227.38	-291.978
2012-11-10 20:39:39	223.2	287.04	41223.9	13.1749		13.1749	-227.523	-292.599
2012-11-10 20:49:39	223.34	287.64	41223.9	13.1819		13.1819	-227.666	-293.211
2012-11-10 20:59:39	223.47	288.25	41223.9	13.1888		13.1888	-227.798	-293.833
2012-11-10 21:09:39	223.61	288.77	41223.9	13.1958		13.1958	-227.941	-294.363
2012-11-10 21:19:39	223.77	289.45	41223.9	13.2027		13.2027	-228.104	-295.056
2012-11-10 21:29:39	223.89	289.99	41223.9	13.2096	41223.9	13.2096	-228.226	-295.607
2012-11-10 21:39:39	223.99	290.74	41223.9	13.2166		13.2166	-228.328	-296.371
2012-11-10 21:49:39	224.12	291.37	41223.9	13.2235		13.2235	-228.461	-297.013
2012-11-10 21:59:39	224.17	291.86	41223.9	13.2305		13.2305	-228.512	-297.513
2012-11-10 22:09:39	224.42	292.48	41223.9	13.2374		13.2374	-228.767	-298.145
2012-11-10 22:19:39	223.44	291.7	41223.9	13.2444		13.2444	-227.768	-297.35
2012-11-10 22:29:39	224.35	293.2	41223.9	13.2513	41223.9	13.2513	-228.695	-298.879
2012-11-10 22:39:39	224.52	293.96	41223.9	13.2583		13.2583	-228.869	-299.653
2012-11-10 22:49:39	224.65	294.57	41224	13.2652		13.2652	-229.001	-300.275
2012-11-10 22:59:39	224.72	295.38	41224	13.2721		13.2721	-229.072	-301.101
2012-11-10 23:09:39	224.86	296.12	41224	13.2791		13.2791	-229.215	-301.855
2012-11-10 23:19:39	225.01	296.71	41224	13.286		13.286	-229.368	-302.457
2012-11-10 23:29:39	225.09	297.34	41224	13.293	41224	13.293	-229.45	-303.099
2012-11-10 23:39:39	225.26	298.08	41224	13.2999		13.2999	-229.623	-303.853
2012-11-10 23:49:39	225.41	298.75	41224	13.3069		13.3069	-229.776	-304.536
2012-11-10 23:59:39	225.53	299.22	41224	13.3138		13.3138	-229.898	-305.015
2012-11-11 00:09:39	225.66	300.02	41224	13.3208		13.3208	-230.031	-305.831
2012-11-11 00:19:39	225.7	300.69	41224	13.3277		13.3277	-230.071	-306.514
2012-11-11 00:29:39	225.84	301.19	41224	13.3346	41224	13.3346	-230.214	-307.023
2012-11-11 00:39:39	225.94	301.81	41224	13.3416		13.3416	-230.316	-307.655
2012-11-11 00:49:39	226.05	302.63	41224	13.3485		13.3485	-230.428	-308.491
2012-11-11 00:59:39	226.14	303.37	41224	13.3555		13.3555	-230.52	-309.246
2012-11-11 01:09:39	226.3	303.89	41224	13.3624		13.3624	-230.683	-309.776
2012-11-11 01:19:39	226.44	304.59	41224.1	13.3694		13.3694	-230.826	-310.489
2012-11-11 01:29:39	226.49	305.37	41224.1	13.3763	41224.1	13.3763	-230.877	-311.284
2012-11-11 01:39:39	226.62	305.91	41224.1	13.3833		13.3833	-231.009	-311.835
2012-11-11 01:49:39	226.77	306.71	41224.1	13.3902		13.3902	-231.162	-312.65
2012-11-11 01:59:39	226.84	307.21	41224.1	13.3971		13.3971	-231.233	-313.16
2012-11-11 02:09:39	226.96	307.97	41224.1	13.4041		13.4041	-231.356	-313.935
2012-11-11 02:19:39	226.99	308.64	41224.1	13.411		13.411	-231.386	-314.618
2012-11-11 02:29:39	227.17	309.37	41224.1	13.418	41224.1	13.418	-231.57	-315.362
2012-11-11 02:39:39	227.3	310.02	41224.1	13.4249		13.4249	-231.702	-316.024
2012-11-11 02:49:39	227.37	310.82	41224.1	13.4319		13.4319	-231.774	-316.84
2012-11-11 02:59:39	227.5	311.44	41224.1	13.4388		13.4388	-231.906	-317.472
2012-11-11 03:09:39	227.67	312.05	41224.1	13.4458		13.4458	-232.08	-318.094
2012-11-11 03:19:39	227.77	312.89	41224.1	13.4527		13.4527	-232.181	-318.95
2012-11-11 03:29:39	227.84	313.55	41224.1	13.4596	41224.1	13.4596	-232.253	-319.623
2012-11-11 03:39:39	227.96	314.3	41224.2	13.4666		13.4666	-232.375	-320.387
2012-11-11 03:49:39	228.12	315.17	41224.2	13.4735		13.4735	-232.538	-321.274
2012-11-11 03:59:39	228.05	315.79	41224.2	13.4805		13.4805	-232.467	-321.906
2012-11-11 04:09:39	228.36	316.6	41224.2	13.4874		13.4874	-232.783	-322.732
2012-11-11 04:19:39	228.46	317.35	41224.2	13.4944		13.4944	-232.885	-323.496
2012-11-11 04:29:39	228.58	318.02	41224.2	13.5013	41224.2	13.5013	-233.007	-324.179
2012-11-11 04:39:39	228.73	318.85	41224.2	13.5083		13.5083	-233.16	-325.025
2012-11-11 04:49:39	228.83	319.68	41224.2	13.5152		13.5152	-233.262	-325.872
2012-11-11 04:59:39	228.95	320.38	41224.2	13.5221		13.5221	-233.384	-326.585
2012-11-11 05:09:39	229.1	321.23	41224.2	13.5291		13.5291	-233.537	-327.452
2012-11-11 05:19:39	229.21	322.04	41224.2	13.536		13.536	-233.649	-328.277
2012-11-11 05:29:39	229.31	322.88	41224.2	13.543	41224.2	13.543	-233.751	-329.134
2012-11-11 05:39:39	229.42	323.58	41224.2	13.5499		13.5499	-233.863	-329.847
2012-11-11 05:49:39	229.54	324.28	41224.2	13.5569		13.5569	-233.986	-330.561
2012-11-11 05:59:39	229.56	324.65	41224.2	13.5638		13.5638	-234.006	-330.938
2012-11-11 06:09:39	229.68	325.84	41224.3	13.5708		13.5708	-234.128	-332.151
2012-11-11 06:19:39	229.87	326.89	41224.3	13.5777		13.5777	-234.322	-333.221
2012-11-11 06:29:39	229.92	327.49	41224.3	13.5846	41224.3	13.5846	-234.373	-333.833
2012-11-11 06:39:39	230.01	328.57	41224.3	13.5916		13.5916	-234.465	-334.934
2012-11-11 06:49:39	230.13	329.55	41224.3	13.5985		13.5985	-234.587	-335.933
2012-11-11 06:59:39	230.29	330.37	41224.3	13.6055		13.6055	-234.75	-336.769
2012-11-11 07:09:39	230.39	331.26	41224.3	13.6124		13.6124	-234.852	-337.676
2012-11-11 07:19:39	230.52	332.01	41224.3	13.6194		13.6194	-234.985	-338.44
2012-11-11 07:29:39	230.62	332.98	41224.3	13.6263	41224.3	13.6263	-235.087	-339.429
2012-11-11 07:39:39	230.72	333.81	41224.3	13.6333		13.6333	-235.189	-340.275
2012-11-11 07:49:39	230.84	334.67	41224.3	13.6402		13.6402	-235.311	-341.152
2012-11-11 07:59:39	230.93	335.64	41224.3	13.6471		13.6471	-235.403	-342.141
2012-11-11 08:09:39	231.07	336.43	41224.3	13.6541		13.6541	-235.545	-342.946
2012-11-11 08:19:39	231.1	337.28	41224.3	13.661		13.661	-235.576	-343.812
2012-11-11 08:29:39	231.33	338.28	41224.4	13.668	41224.4	13.668	-235.81	-344.832
2012-11-11 08:39:39	231.44	339.15	41224.4	13.6749		13.6749	-235.923	-345.719
2012-11-11 08:49:39	231.52	339.89	41224.4	13.6819		13.6819	-236.004	-346.473
2012-11-11 08:59:39	231.66	340.69	41224.4	13.6888		13.6888	-236.147	-347.288
2012-11-11 09:09:39	231.67	341.61	41224.4	13.6958		13.6958	-236.157	-348.226
2012-11-11 09:19:39	231.78	342.39	41224.4	13.7027		13.7027	-236.269	-349.021
2012-11-11 09:29:39	231.9	343.53	41224.4	13.7096	41224.4	13.7096	-236.391	-350.183
2012-11-11 09:39:39	231.96	344.41	41224.4	13.7166		13.7166	-236.453	-351.081
2012-11-11 09:49:39	232.14	345.28	41224.4	13.7235		13.7235	-236.636	-351.967
2012-11-11 09:59:39	232.21	346.37	41224.4	13.7305		13.7305	-236.707	-353.078
2012-11-11 10:09:39	232.28	347.45	41224.4	13.7374		13.7374	-236.779	-354.179
2012-11-11 10:19:39	232.42	348.6	41224.4	13.7444		13.7444	-236.922	-355.352
2012-11-11 10:29:39	232.57	349.46	41224.4	13.7513	41224.4	13.7513	-237.074	-356.228
2012-11-11 10:39:39	232.69	350.39	41224.4	13.7583		13.7583	-237.197	-357.176
2012-11-11 10:49:39	232.84	351.62	41224.5	13.7652		13.7652	-237.35	-358.43
2012-11-11 10:59:39	232.91	352.52	41224.5	13.7721		13.7721	-237.421	-359.348
2012-11-11 11:09:39	232.99	353.64	41224.5	13.7791		13.7791	-237.503	-360.489
2012-11-11 11:19:39	233.13	354.69	41224.5	13.786		13.786	-237.645	-361.56
2012-11-11 11:29:39	233.27	355.5	41224.5	13.793	41224.5	13.793	-237.788	-362.385
2012-11-11 11:39:39	233.39	356.93	41224.5	13.7999		13.7999	-237.91	-363.843
2012-11-11 11:49:39	233.53	357.99	41224.5	13.8069		13.8069	-238.053	-364.924
2012-11-11 11:59:39	233.62	359.37	41224.5	13.8138		13.8138	-238.145	-366.33
2012-11-11 12:09:39	233.76	360.46	41224.5	13.8208		13.8208	-238.287	-367.441
2012-11-11 12:19:39	233.86	361.55	41224.5	13.8277		13.8277	-238.389	-368.552
2012-11-11 12:29:39	233.93	362.68	41224.5	13.8346	41224.5	13.8346	-238.461	-369.704
2012-11-11 12:39:39	234.06	363.77	41224.5	13.8416		13.8416	-238.593	-370.815
2012-11-11 12:49:39	234.24	364.85	41224.5	13.8485		13.8485	-238.777	-371.916
2012-11-11 12:59:39	234.12	365.99	41224.5	13.8555		13.8555	-238.654	-373.078
2012-11-11 13:09:39	234.38	367.42	41224.5	13.8624		13.8624	-238.919	-374.536
2012-11-11 13:19:39	234.5	368.63	41224.6	13.8694		13.8694	-239.042	-375.77
[truncated: 1,033 more rows]

## Sheet: Tensi
Zeit [d]	MP bot(2) [cm]	MP top(1) [cm]		air entry bot		AE time	AE [cm]	Type	Pos	Weight
0.0429745	0.0611621	-2.43629			8800	-41210.7	-8970.44	1	2	1
0.0846412	-0.244648	-2.73191
0.126308	-0.570846	-3.07849		air entry top
0.167975	-0.77472	-3.28236		Time		AE time	AE [cm]	Type	Pos	Weight
0.209641	-1.03976	-3.56779		2012-11-14 04:39:39	8800	16.5083	-8970.44	1	1	1
0.251308	-1.31498	-3.84302
0.292975	-1.56983	-4.09786
0.334641	-1.67176	-4.22018
0.376308	-1.81448	-4.3527
0.417975	-1.89602	-4.44444
0.459641	-2.0999	-4.62793
0.501308	-2.27319	-4.82161
0.542975	-2.30377	-4.85219
0.584641	-2.45668	-5.0051
0.626308	-2.59939	-5.158
0.667975	-2.69113	-5.23955
0.709641	-2.84404	-5.41284
0.751308	-2.92559	-5.49439
0.792975	-3.04791	-5.62691
0.834641	-3.2212	-5.75943
0.876308	-3.2212	-5.75943
0.917975	-3.26198	-5.84098
0.959641	-3.37411	-5.94292
1.00131	-3.30275	-5.86137
1.04297	-3.02752	-5.58614
1.08464	-3.18043	-5.76962
1.12631	-3.28236	-5.85117
1.16797	-3.43527	-6.01427
1.20964	-3.58818	-6.16718
1.25131	-3.73089	-6.32008
1.29297	-3.79205	-6.38124
1.33464	-3.57798	-6.16718
1.37631	-3.74108	-6.33028
1.41797	-3.8736	-6.46279
1.45964	-3.97554	-6.56473
1.50131	-4.05708	-6.64628
1.54297	-4.0367	-6.62589
1.58464	-4.11825	-6.69725
1.62631	-4.1896	-6.7686
1.66797	-4.15902	-6.74822
1.70964	-4.25076	-6.83996
1.75131	-4.29154	-6.85015
1.79297	-4.3527	-6.92151
1.83464	-4.40367	-6.97248
1.87631	-4.54638	-7.10499
1.91797	-4.58716	-7.15596
1.95964	-4.59735	-7.17635
2.00131	-4.70948	-7.27829
2.04297	-4.70948	-7.26809
2.08464	-4.87258	-7.45158
2.12631	-5.05607	-7.63507
2.16797	-5.17839	-7.75739
2.20964	-5.06626	-7.62487
2.25131	-5.30071	-7.85933
2.29297	-5.29052	-7.85933
2.33464	-5.40265	-7.97146
2.37631	-5.44343	-8.03262
2.41797	-5.54536	-8.12436
2.45964	-5.65749	-8.23649
2.50131	-5.69827	-8.28746
2.54297	-5.82059	-8.40979
2.58464	-5.76962	-8.35882
2.62631	-5.91233	-8.50153
2.66797	-5.92253	-8.51172
2.70964	-5.95311	-8.5525
2.75131	-6.02446	-8.61366
2.79297	-5.19878	-7.76758
2.83464	-5.29052	-7.88991
2.87631	-5.49439	-8.08359
2.91797	-5.62691	-8.21611
2.95964	-5.8002	-8.36901
3.00131	-5.9633	-8.51172
3.04297	-5.95311	-8.5525
3.08464	-6.20795	-8.80734
3.12631	-6.38124	-8.97044
3.16797	-6.55454	-9.14373
3.20964	-6.71764	-9.31702
3.25131	-6.90112	-9.50051
3.29297	-7.04383	-9.66361
3.33464	-7.20693	-9.79613
3.37631	-7.24771	-9.86748
3.41797	-7.43119	-10.0408
3.45964	-7.47197	-10.0815
3.50131	-7.5841	-10.1937
3.54297	-7.72681	-10.3466
3.58464	-7.87971	-10.4893
3.62631	-8.03262	-10.6524
3.66797	-8.02243	-10.6524
3.70964	-7.63507	-10.2141
3.75131	-7.82875	-10.4281
3.79297	-8.07339	-10.6422
3.83464	-8.30785	-10.8869
3.87631	-8.50153	-11.0805
3.91797	-8.74618	-11.3252
3.95964	-8.96024	-11.5392
4.00131	-9.18451	-11.7431
4.04297	-9.09276	-11.7023
4.08464	-9.36799	-11.9674
4.12631	-9.62283	-12.2222
4.16797	-9.87768	-12.4771
4.20964	-10.1937	-12.7829
4.25131	-10.5199	-13.0887
4.29297	-10.8155	-13.3945
4.33464	-11.1213	-13.7309
4.37631	-11.4475	-14.0469
4.41797	-11.7023	-14.3119
4.45964	-11.9572	-14.577
4.50131	-12.1713	-14.791
4.54297	-12.4363	-15.0663
4.58464	-12.7523	-15.3823
4.62631	-13.0581	-15.6779
4.66797	-13.262	-15.8919
4.70964	-13.4455	-16.0856
4.75131	-13.6901	-16.3201
4.79297	-13.894	-16.524
4.83464	-14.1794	-16.7686
4.87631	-14.4343	-17.054
4.91797	-14.7197	-17.3496
4.95964	-14.8216	-17.4414
5.00131	-15.1682	-17.788
5.04297	-15.5352	-18.1549
5.08464	-15.9327	-18.5525
5.12631	-16.3405	-18.9704
5.16797	-16.6972	-19.317
5.20964	-17.1152	-19.7655
5.25131	-17.5535	-20.1937
5.29297	-17.9409	-20.5912
5.33464	-18.3486	-20.9888
5.37631	-18.787	-21.4373
5.41797	-19.2151	-21.8756
5.45964	-19.6636	-22.2936
5.50131	-20.0917	-22.7421
5.54297	-20.5097	-23.1702
5.58464	-20.9684	-23.6188
5.62631	-21.3863	-24.0571
5.66797	-21.7839	-24.4444
5.70964	-22.2936	-24.9541
5.75131	-22.6198	-25.2701
5.79297	-23.16	-25.8104
5.83464	-23.5984	-26.2487
5.87631	-24.0571	-26.7176
5.91797	-24.5362	-27.2069
5.95964	-24.6381	-27.3089
6.00131	-25.1478	-27.8287
6.04297	-25.6473	-28.3282
6.08464	-26.055	-28.736
6.12631	-26.6769	-29.3374
6.16797	-27.2273	-29.8981
6.20964	-27.7982	-30.4791
6.25131	-28.3996	-31.0907
6.29297	-29.0418	-31.7227
6.33464	-29.6942	-32.3751
6.37631	-30.316	-32.9969
6.41797	-30.999	-33.6901
6.45964	-31.6412	-34.3425
6.50131	-32.2936	-34.9949
6.54297	-32.9867	-35.6881
6.58464	-33.6799	-36.3507
6.62631	-34.3629	-37.0642
6.66797	-35.0051	-37.7166
6.70964	-35.6473	-38.3588
6.75131	-36.3201	-39.0214
6.79297	-36.9317	-39.633
6.83464	-37.6045	-40.2956
6.87631	-38.2977	-41.0092
6.91797	-39.0214	-41.7227
6.95964	-39.4903	-42.212
7.00131	-40.367	-43.0887
7.04297	-41.2436	-43.9653
7.08464	-42.0999	-44.8012
7.12631	-43.0785	-45.8002
7.16797	-43.9653	-46.6972
7.20964	-44.7197	-47.5841
7.25131	-45.6371	-48.369
7.29297	-46.4934	-49.2355
7.33464	-47.4108	-50.1223
7.37631	-48.3588	-51.0805
7.41797	-49.368	-52.0999
7.45964	-50.367	-53.0989
7.50131	-51.366	-54.1081
7.54297	-52.3242	-55.0866
7.58464	-53.2926	-56.0449
7.62631	-54.3527	-57.105
7.66797	-55.3823	-58.0734
7.70964	-56.3914	-59.1437
7.75131	-57.4006	-60.1427
7.79297	-58.5015	-61.2742
7.83464	-59.6738	-62.4567
7.87631	-60.9888	-63.7513
7.91797	-62.212	-64.9541
7.95964	-63.2824	-66.055
8.00131	-64.6483	-67.3904
8.04297	-66.0347	-68.787
8.08464	-67.4006	-70.1835
8.12631	-68.8583	-71.6412
8.16797	-70.1733	-72.9867
8.20964	-71.58	-74.3833
8.25131	-72.9562	-75.7492
8.29297	-74.3017	-77.1254
8.33464	-75.6881	-78.5219
8.37631	-77.1152	-79.9694
8.41797	-78.5423	-81.4067
8.45964	-80.0612	-82.9256
8.50131	-81.5087	-84.3833
8.54297	-82.9664	-85.8614
8.58464	-84.4648	-87.37
8.62631	-85.9837	-88.8889
8.66797	-87.4822	-90.3976
8.70964	-88.9297	-91.8756
8.75131	-90.4893	-93.3945
8.79297	-91.9368	-94.9949
8.83464	-93.5474	-96.4832
8.87631	-95.158	-98.1957
8.91797	-96.7176	-99.7859
8.95964	-98.2875	-101.346
9.00131	-99.9694	-103.078
9.04297	-101.621	-104.771
9.08464	-103.415	-106.514
9.12631	-105.301	-108.42
9.16797	-107.217	-110.377
9.20964	-109.154	-112.294
9.25131	-110.938	-114.159
9.29297	-112.875	-116.096
9.33464	-114.76	-117.951
9.37631	-116.473	-119.684
9.41797	-118.247	-121.498
9.45964	-120.061	-123.405
9.50131	-122.008	-125.321
9.54297	-123.843	-127.227
9.58464	-125.668	-129.103
9.62631	-127.472	-130.917
9.66797	-129.134	-132.589
9.70964	-130.622	-134.179
9.75131	-132.151	-135.678
9.79297	-133.7	-137.278
9.83464	-135.392	-139.011
9.87631	-137.187	-140.866
9.91797	-139.021	-142.732
9.95964	-140.836	-144.597
10.0013	-142.681	-146.463
10.043	-144.485	-148.471
10.0846	-146.463	-150.377
10.1263	-148.277	-152.202
10.168	-150.265	-154.251
10.2096	-152.334	-156.381
10.2513	-154.312	-158.379
10.293	-156.239	-160.438
10.3346	-158.135	-162.416
10.3763	-159.949	-164.373
10.418	-161.774	-166.29
10.4596	-163.547	-168.165
10.5013	-165.311	-169.949
10.543	-166.972	-171.723
10.5846	-168.573	-173.435
10.6263	-170.153	-175.046
10.668	-171.519	-176.565
10.7096	-172.966	-178.094
10.7513	-174.353	-179.48
10.793	-175.719	-181.03
10.8346	-177.064	-182.457
10.8763	-178.379	-183.833
10.918	-179.46	-185.199
10.9596	-180.591	-186.544
11.0013	-181.835	-187.982
11.043	-183.038	-189.348
11.0846	-184.057	-190.571
11.1263	-185.372	-192.09
11.168	-186.595	-193.598
11.2096	-187.88	-195.199
11.2513	-189.062	-196.789
11.293	-190.163	-198.308
11.3346	-191.244	-199.766
11.3763	-192.294	-201.376
11.418	-193.405	-202.966
11.4596	-194.434	-204.516
11.5013	-195.494	-206.126
11.543	-196.432	-207.655
11.5846	-197.39	-209.266
11.6263	-198.379	-210.826
11.668	-199.021	-211.957
11.7096	-199.715	-212.824
11.7513	-200.52	-214.149
11.793	-201.366	-215.505
11.8346	-202.222	-216.993
11.8763	-203.038	-218.552
11.918	-203.435	-219.908
11.9596	-204.444	-221.723
12.0013	-205.494	-223.853
12.043	-206.402	-225.882
12.0846	-207.166	-227.727
12.1263	-208.012	-229.786
12.168	-208.889	-231.774
12.2096	-209.664	-233.802
12.2513	-210.479	-235.973
12.293	-211.274	-238.114
12.3346	-212.151	-239.939
12.3763	-212.905	-242.436
12.418	-213.629	-244.699
12.4596	-214.393	-246.769
12.5013	-215.178	-249.011
12.543	-215.892	-251.254
12.5846	-216.595	-253.547
12.6263	-217.39	-255.892
12.668	-218.114	-258.471
12.7096	-218.756	-260.826
12.7513	-219.409	-263.078
12.793	-219.766	-265.28
12.8346	-220.449	-267.941
12.8763	-221.182	-270.581
12.918	-221.835	-273.191
12.9596	-222.538	-274.73
13.0013	-223.823	-278.094
13.043	-224.985	-281.549
13.0846	-225.861	-285.025
13.1263	-226.595	-288.522
13.168	-227.38	-291.978
13.2096	-228.226	-295.607
13.2513	-228.695	-298.879
13.293	-229.45	-303.099
13.3346	-230.214	-307.023
13.3763	-230.877	-311.284
13.418	-231.57	-315.362
13.4596	-232.253	-319.623
13.5013	-233.007	-324.179
13.543	-233.751	-329.134
13.5846	-234.373	-333.833
13.6263	-235.087	-339.429
13.668	-235.81	-344.832
13.7096	-236.391	-350.183
13.7513	-237.074	-356.228
13.793	-237.788	-362.385
13.8346	-238.461	-369.704
13.8763	-239.225	-376.993
13.918	-240.999	-384.699
13.9596	-243.466	-388.991
14.0013	-247.095	-401.713
14.043	-248.777	-412.385
14.0846	-243.344	-411.417
14.1263	-251.498	-437.88
14.168	-252.956	-452.671
14.2096	-254.353	-468.746
14.2513	-255.403	-486.279
14.293	-256.483	-505.566
14.3346	-257.513	-526.3
14.3763	-258.991	-551.539
14.418	-259.857	-580.387
14.4596	-261.131	-609.429
14.5013	-262.039	-643.996
14.543	-262.864	-682.222
14.5846	-264.016	-728.43
14.6263	-265.117	-785.8
14.668	-265.759	-842.161
14.7096	-266.361	-916.208
14.7513	-272.253	-1017.75
14.793	-273.823	-1128.7
14.8346	-275.168	-1274.16
14.8763	-286.789
14.918	-291.804
14.9596	-295.647
15.0013	-297.523
15.043	-300.387
15.0846	-303.66
15.1263	-306.932
15.168	-310.234
15.2096	-311.978
15.2513	-313.996
15.293	-316.636
15.3346	-320.234
15.3763	-323.109
15.418	-326.493
15.4596	-330.143
15.5013	-333.109
15.543	-336.412
15.5846	-339.602
15.6263	-343.078
15.668	-344.699
15.7096	-341.529
15.7513	-346.402
15.793	-349.786
15.8346	-352.956
15.8763	-357.125
15.918	-361.417
15.9596	-366.402
16.0013	-354.628
16.043	-370.071
16.0846	-376.239
16.1263	-381.865
16.168	-386.85
16.2096	-392.732
16.2513	-398.991
16.293	-404.475
16.3346	-407.207
16.3763	-410.153
16.418	-413.863
16.4596	-418.858
16.5013	-424.832
16.543	-431.131
16.5846	-436.34
16.6263	-442.487
16.668	-442.039
16.7096	-436.514
16.7513	-443.058
16.793	-455.24
16.8346	-464.771
16.8763	-471.978
16.918	-477.085
16.9596	-472.783
17.0013	-485.657
17.043	-493.374
17.0846	-497.594
17.1263	-514.077
17.168	-520.153
17.2096	-531.56
17.2513	-544.567
17.293	-556.269
17.3346	-569.531
17.3763	-580.979
17.418	-595.698
17.4596	-609.134
17.5013	-624.944
17.543	-639.643
17.5846	-656.728
17.6263	-677.156
17.668	-684.016
17.7096	-672.579
17.7513	-688.267

## Sheet: HYDRUS
Data für die Zielfunktion: 2 x Tensionen, 1 x Endwassergehalt						Verdunstungsrate
Time	Obs	Type	Pos	Weight		Zeitintervall		Evarate [cm/d]			Type	1-Tension	2-Wassergehalt
0.0429745	0.0611621	1	2	1		0.637917	0	0.409067			Pos	1-top	2-bot	(von oben nach unten)
0.0846412	-0.244648	1	2	1		1.05686	0	0.420673			29	Time-Variable boundary conditions+
0.126308	-0.570846	1	2	1		1.64537	0	0.351078			17.769	Final Time	Time Information
0.167975	-0.77472	1	2	1		2.1731	0	0.325344			812
0.209641	-1.03976	1	2	1		2.67968	0	0.329551			-3.39226	BC-top	[hPa]
0.251308	-1.31498	1	2	1		2.78552	0	0.331844			-2.14226	tens_top_ini	[hPa]	1
0.292975	-1.56983	1	2	1		3.02659	0	0.311977			0.386429	tens_bot_ini	[hPa]	2
0.334641	-1.67176	1	2	1		3.64894	0	0.323355			1.63643	BC-bot	[hPa]
0.376308	-1.81448	1	2	1		4.02846	0	0.334258
0.417975	-1.89602	1	2	1		4.76911	0	0.335868
0.459641	-2.0999	1	2	1		5.15634	0	0.320668
0.501308	-2.27319	1	2	1		5.74909	0	0.342643
0.542975	-2.30377	1	2	1		6.08413	0	0.30895
0.584641	-2.45668	1	2	1		6.78737	0	0.301732
0.626308	-2.59939	1	2	1		7.12697	0	0.283517
0.667975	-2.69113	1	2	1		7.7795	0	0.271035
0.709641	-2.84404	1	2	1		8.15294	0	0.28604
0.751308	-2.92559	1	2	1		8.79176	0	0.269415
0.792975	-3.04791	1	2	1		9.18624	0	0.298542
0.834641	-3.2212	1	2	1		9.73198	0	0.27372
0.876308	-3.2212	1	2	1		10.1016	0	0.252095
0.917975	-3.26198	1	2	1		10.7344	0	0.262206
0.959641	-3.37411	1	2	1		11.0875	0	0.26855
1.00131	-3.30275	1	2	1		11.669	0	0.269671
1.04297	-3.02752	1	2	1		13.2383	0	0.199206
1.08464	-3.18043	1	2	1		13.8884	0	0.125212
1.12631	-3.28236	1	2	1		14.0847	0	0.125276
1.16797	-3.43527	1	2	1		14.7266	0	0.116515
1.20964	-3.58818	1	2	1		17.769	0	0.0927254
1.25131	-3.73089	1	2	1
1.29297	-3.79205	1	2	1
1.33464	-3.57798	1	2	1
1.37631	-3.74108	1	2	1
1.41797	-3.8736	1	2	1
1.45964	-3.97554	1	2	1
1.50131	-4.05708	1	2	1
1.54297	-4.0367	1	2	1
1.58464	-4.11825	1	2	1
1.62631	-4.1896	1	2	1
1.66797	-4.15902	1	2	1
1.70964	-4.25076	1	2	1
1.75131	-4.29154	1	2	1
1.79297	-4.3527	1	2	1
1.83464	-4.40367	1	2	1
1.87631	-4.54638	1	2	1
1.91797	-4.58716	1	2	1
1.95964	-4.59735	1	2	1
2.00131	-4.70948	1	2	1
2.04297	-4.70948	1	2	1
2.08464	-4.87258	1	2	1
2.12631	-5.05607	1	2	1
2.16797	-5.17839	1	2	1
2.20964	-5.06626	1	2	1
2.25131	-5.30071	1	2	1
2.29297	-5.29052	1	2	1
2.33464	-5.40265	1	2	1
2.37631	-5.44343	1	2	1
2.41797	-5.54536	1	2	1
2.45964	-5.65749	1	2	1
2.50131	-5.69827	1	2	1
2.54297	-5.82059	1	2	1
2.58464	-5.76962	1	2	1
2.62631	-5.91233	1	2	1
2.66797	-5.92253	1	2	1
2.70964	-5.95311	1	2	1
2.75131	-6.02446	1	2	1
2.79297	-5.19878	1	2	1
2.83464	-5.29052	1	2	1
2.87631	-5.49439	1	2	1
2.91797	-5.62691	1	2	1
2.95964	-5.8002	1	2	1
3.00131	-5.9633	1	2	1
3.04297	-5.95311	1	2	1
3.08464	-6.20795	1	2	1
3.12631	-6.38124	1	2	1
3.16797	-6.55454	1	2	1
3.20964	-6.71764	1	2	1
3.25131	-6.90112	1	2	1
3.29297	-7.04383	1	2	1
3.33464	-7.20693	1	2	1
3.37631	-7.24771	1	2	1
3.41797	-7.43119	1	2	1
3.45964	-7.47197	1	2	1
3.50131	-7.5841	1	2	1
3.54297	-7.72681	1	2	1
3.58464	-7.87971	1	2	1
3.62631	-8.03262	1	2	1
3.66797	-8.02243	1	2	1
3.70964	-7.63507	1	2	1
3.75131	-7.82875	1	2	1
3.79297	-8.07339	1	2	1
3.83464	-8.30785	1	2	1
3.87631	-8.50153	1	2	1
3.91797	-8.74618	1	2	1
3.95964	-8.96024	1	2	1
4.00131	-9.18451	1	2	1
4.04297	-9.09276	1	2	1
4.08464	-9.36799	1	2	1
4.12631	-9.62283	1	2	1
4.16797	-9.87768	1	2	1
4.20964	-10.1937	1	2	1
4.25131	-10.5199	1	2	1
4.29297	-10.8155	1	2	1
4.33464	-11.1213	1	2	1
4.37631	-11.4475	1	2	1
4.41797	-11.7023	1	2	1
4.45964	-11.9572	1	2	1
4.50131	-12.1713	1	2	1
4.54297	-12.4363	1	2	1
4.58464	-12.7523	1	2	1
4.62631	-13.0581	1	2	1
4.66797	-13.262	1	2	1
4.70964	-13.4455	1	2	1
4.75131	-13.6901	1	2	1
4.79297	-13.894	1	2	1
4.83464	-14.1794	1	2	1
4.87631	-14.4343	1	2	1
4.91797	-14.7197	1	2	1
4.95964	-14.8216	1	2	1
5.00131	-15.1682	1	2	1
5.04297	-15.5352	1	2	1
5.08464	-15.9327	1	2	1
5.12631	-16.3405	1	2	1
5.16797	-16.6972	1	2	1
5.20964	-17.1152	1	2	1
5.25131	-17.5535	1	2	1
5.29297	-17.9409	1	2	1
5.33464	-18.3486	1	2	1
5.37631	-18.787	1	2	1
5.41797	-19.2151	1	2	1
5.45964	-19.6636	1	2	1
5.50131	-20.0917	1	2	1
5.54297	-20.5097	1	2	1
5.58464	-20.9684	1	2	1
5.62631	-21.3863	1	2	1
5.66797	-21.7839	1	2	1
5.70964	-22.2936	1	2	1
5.75131	-22.6198	1	2	1
5.79297	-23.16	1	2	1
5.83464	-23.5984	1	2	1
5.87631	-24.0571	1	2	1
5.91797	-24.5362	1	2	1
5.95964	-24.6381	1	2	1
6.00131	-25.1478	1	2	1
6.04297	-25.6473	1	2	1
6.08464	-26.055	1	2	1
6.12631	-26.6769	1	2	1
6.16797	-27.2273	1	2	1
6.20964	-27.7982	1	2	1
6.25131	-28.3996	1	2	1
6.29297	-29.0418	1	2	1
6.33464	-29.6942	1	2	1
6.37631	-30.316	1	2	1
6.41797	-30.999	1	2	1
6.45964	-31.6412	1	2	1
6.50131	-32.2936	1	2	1
6.54297	-32.9867	1	2	1
6.58464	-33.6799	1	2	1
6.62631	-34.3629	1	2	1
6.66797	-35.0051	1	2	1
6.70964	-35.6473	1	2	1
6.75131	-36.3201	1	2	1
6.79297	-36.9317	1	2	1
6.83464	-37.6045	1	2	1
6.87631	-38.2977	1	2	1
6.91797	-39.0214	1	2	1
6.95964	-39.4903	1	2	1
7.00131	-40.367	1	2	1
7.04297	-41.2436	1	2	1
7.08464	-42.0999	1	2	1
7.12631	-43.0785	1	2	1
7.16797	-43.9653	1	2	1
7.20964	-44.7197	1	2	1
7.25131	-45.6371	1	2	1
7.29297	-46.4934	1	2	1
7.33464	-47.4108	1	2	1
7.37631	-48.3588	1	2	1
7.41797	-49.368	1	2	1
7.45964	-50.367	1	2	1
7.50131	-51.366	1	2	1
7.54297	-52.3242	1	2	1
7.58464	-53.2926	1	2	1
7.62631	-54.3527	1	2	1
7.66797	-55.3823	1	2	1
7.70964	-56.3914	1	2	1
7.75131	-57.4006	1	2	1
7.79297	-58.5015	1	2	1
7.83464	-59.6738	1	2	1
7.87631	-60.9888	1	2	1
7.91797	-62.212	1	2	1
7.95964	-63.2824	1	2	1
8.00131	-64.6483	1	2	1
8.04297	-66.0347	1	2	1
8.08464	-67.4006	1	2	1
8.12631	-68.8583	1	2	1
8.16797	-70.1733	1	2	1
8.20964	-71.58	1	2	1
8.25131	-72.9562	1	2	1
8.29297	-74.3017	1	2	1
8.33464	-75.6881	1	2	1
8.37631	-77.1152	1	2	1
8.41797	-78.5423	1	2	1
8.45964	-80.0612	1	2	1
8.50131	-81.5087	1	2	1
8.54297	-82.9664	1	2	1
8.58464	-84.4648	1	2	1
8.62631	-85.9837	1	2	1
8.66797	-87.4822	1	2	1
8.70964	-88.9297	1	2	1
8.75131	-90.4893	1	2	1
8.79297	-91.9368	1	2	1
8.83464	-93.5474	1	2	1
8.87631	-95.158	1	2	1
8.91797	-96.7176	1	2	1
8.95964	-98.2875	1	2	1
9.00131	-99.9694	1	2	1
9.04297	-101.621	1	2	1
9.08464	-103.415	1	2	1
9.12631	-105.301	1	2	1
9.16797	-107.217	1	2	1
9.20964	-109.154	1	2	1
9.25131	-110.938	1	2	1
9.29297	-112.875	1	2	1
9.33464	-114.76	1	2	1
9.37631	-116.473	1	2	1
9.41797	-118.247	1	2	1
9.45964	-120.061	1	2	1
9.50131	-122.008	1	2	1
9.54297	-123.843	1	2	1
9.58464	-125.668	1	2	1
9.62631	-127.472	1	2	1
9.66797	-129.134	1	2	1
9.70964	-130.622	1	2	1
9.75131	-132.151	1	2	1
9.79297	-133.7	1	2	1
9.83464	-135.392	1	2	1
9.87631	-137.187	1	2	1
9.91797	-139.021	1	2	1
9.95964	-140.836	1	2	1
10.0013	-142.681	1	2	1
10.043	-144.485	1	2	1
10.0846	-146.463	1	2	1
10.1263	-148.277	1	2	1
10.168	-150.265	1	2	1
10.2096	-152.334	1	2	1
10.2513	-154.312	1	2	1
10.293	-156.239	1	2	1
10.3346	-158.135	1	2	1
10.3763	-159.949	1	2	1
10.418	-161.774	1	2	1
10.4596	-163.547	1	2	1
10.5013	-165.311	1	2	1
10.543	-166.972	1	2	1
10.5846	-168.573	1	2	1
10.6263	-170.153	1	2	1
10.668	-171.519	1	2	1
10.7096	-172.966	1	2	1
10.7513	-174.353	1	2	1
10.793	-175.719	1	2	1
10.8346	-177.064	1	2	1
10.8763	-178.379	1	2	1
10.918	-179.46	1	2	1
10.9596	-180.591	1	2	1
11.0013	-181.835	1	2	1
11.043	-183.038	1	2	1
11.0846	-184.057	1	2	1
11.1263	-185.372	1	2	1
11.168	-186.595	1	2	1
11.2096	-187.88	1	2	1
11.2513	-189.062	1	2	1
11.293	-190.163	1	2	1
11.3346	-191.244	1	2	1
11.3763	-192.294	1	2	1
11.418	-193.405	1	2	1
11.4596	-194.434	1	2	1
11.5013	-195.494	1	2	1
11.543	-196.432	1	2	1
11.5846	-197.39	1	2	1
11.6263	-198.379	1	2	1
11.668	-199.021	1	2	1
11.7096	-199.715	1	2	1
11.7513	-200.52	1	2	1
11.793	-201.366	1	2	1
11.8346	-202.222	1	2	1
11.8763	-203.038	1	2	1
11.918	-203.435	1	2	1
11.9596	-204.444	1	2	1
12.0013	-205.494	1	2	1
12.043	-206.402	1	2	1
12.0846	-207.166	1	2	1
12.1263	-208.012	1	2	1
12.168	-208.889	1	2	1
12.2096	-209.664	1	2	1
12.2513	-210.479	1	2	1
12.293	-211.274	1	2	1
12.3346	-212.151	1	2	1
12.3763	-212.905	1	2	1
12.418	-213.629	1	2	1
12.4596	-214.393	1	2	1
12.5013	-215.178	1	2	1
12.543	-215.892	1	2	1
12.5846	-216.595	1	2	1
12.6263	-217.39	1	2	1
12.668	-218.114	1	2	1
12.7096	-218.756	1	2	1
12.7513	-219.409	1	2	1
12.793	-219.766	1	2	1
12.8346	-220.449	1	2	1
12.8763	-221.182	1	2	1
12.918	-221.835	1	2	1
12.9596	-222.538	1	2	1
13.0013	-223.823	1	2	1
13.043	-224.985	1	2	1
13.0846	-225.861	1	2	1
13.1263	-226.595	1	2	1
13.168	-227.38	1	2	1
13.2096	-228.226	1	2	1
13.2513	-228.695	1	2	1
13.293	-229.45	1	2	1
13.3346	-230.214	1	2	1
13.3763	-230.877	1	2	1
13.418	-231.57	1	2	1
13.4596	-232.253	1	2	1
13.5013	-233.007	1	2	1
13.543	-233.751	1	2	1
13.5846	-234.373	1	2	1
13.6263	-235.087	1	2	1
13.668	-235.81	1	2	1
13.7096	-236.391	1	2	1
13.7513	-237.074	1	2	1
13.793	-237.788	1	2	1
13.8346	-238.461	1	2	1
13.8763	-239.225	1	2	1
13.918	-240.999	1	2	1
13.9596	-243.466	1	2	1
14.0013	-247.095	1	2	1
14.043	-248.777	1	2	1
14.0846	-243.344	1	2	1
14.1263	-251.498	1	2	1
14.168	-252.956	1	2	1
14.2096	-254.353	1	2	1
14.2513	-255.403	1	2	1
14.293	-256.483	1	2	1
14.3346	-257.513	1	2	1
14.3763	-258.991	1	2	1
14.418	-259.857	1	2	1
14.4596	-261.131	1	2	1
14.5013	-262.039	1	2	1
14.543	-262.864	1	2	1
14.5846	-264.016	1	2	1
14.6263	-265.117	1	2	1
14.668	-265.759	1	2	1
14.7096	-266.361	1	2	1
14.7513	-272.253	1	2	1
14.793	-273.823	1	2	1
14.8346	-275.168	1	2	1
14.8763	-286.789	1	2	1
14.918	-291.804	1	2	1
14.9596	-295.647	1	2	1
15.0013	-297.523	1	2	1
15.043	-300.387	1	2	1
15.0846	-303.66	1	2	1
15.1263	-306.932	1	2	1
15.168	-310.234	1	2	1
15.2096	-311.978	1	2	1
15.2513	-313.996	1	2	1
15.293	-316.636	1	2	1
15.3346	-320.234	1	2	1
15.3763	-323.109	1	2	1
15.418	-326.493	1	2	1
15.4596	-330.143	1	2	1
15.5013	-333.109	1	2	1
15.543	-336.412	1	2	1
15.5846	-339.602	1	2	1
15.6263	-343.078	1	2	1
15.668	-344.699	1	2	1
15.7096	-341.529	1	2	1
15.7513	-346.402	1	2	1
15.793	-349.786	1	2	1
15.8346	-352.956	1	2	1
15.8763	-357.125	1	2	1
15.918	-361.417	1	2	1
15.9596	-366.402	1	2	1
16.0013	-354.628	1	2	1
16.043	-370.071	1	2	1
16.0846	-376.239	1	2	1
16.1263	-381.865	1	2	1
16.168	-386.85	1	2	1
16.2096	-392.732	1	2	1
16.2513	-398.991	1	2	1
16.293	-404.475	1	2	1
16.3346	-407.207	1	2	1
16.3763	-410.153	1	2	1
16.418	-413.863	1	2	1
16.4596	-418.858	1	2	1
16.5013	-424.832	1	2	1
16.543	-431.131	1	2	1
16.5846	-436.34	1	2	1
16.6263	-442.487	1	2	1
16.668	-442.039	1	2	1
16.7096	-436.514	1	2	1
16.7513	-443.058	1	2	1
16.793	-455.24	1	2	1
16.8346	-464.771	1	2	1
16.8763	-471.978	1	2	1
16.918	-477.085	1	2	1
16.9596	-472.783	1	2	1
17.0013	-485.657	1	2	1
17.043	-493.374	1	2	1
17.0846	-497.594	1	2	1
17.1263	-514.077	1	2	1
17.168	-520.153	1	2	1
17.2096	-531.56	1	2	1
17.2513	-544.567	1	2	1
17.293	-556.269	1	2	1
17.3346	-569.531	1	2	1
17.3763	-580.979	1	2	1
17.418	-595.698	1	2	1
17.4596	-609.134	1	2	1
17.5013	-624.944	1	2	1
17.543	-639.643	1	2	1
17.5846	-656.728	1	2	1
17.6263	-677.156	1	2	1
17.668	-684.016	1	2	1
17.7096	-672.579	1	2	1
17.7513	-688.267	1	2	1
0.0429745	-2.43629	1	1	1
0.0846412	-2.73191	1	1	1
0.126308	-3.07849	1	1	1
0.167975	-3.28236	1	1	1
0.209641	-3.56779	1	1	1
0.251308	-3.84302	1	1	1
0.292975	-4.09786	1	1	1
0.334641	-4.22018	1	1	1
0.376308	-4.3527	1	1	1
0.417975	-4.44444	1	1	1
0.459641	-4.62793	1	1	1
0.501308	-4.82161	1	1	1
0.542975	-4.85219	1	1	1
0.584641	-5.0051	1	1	1
0.626308	-5.158	1	1	1
0.667975	-5.23955	1	1	1
0.709641	-5.41284	1	1	1
0.751308	-5.49439	1	1	1
0.792975	-5.62691	1	1	1
0.834641	-5.75943	1	1	1
0.876308	-5.75943	1	1	1
0.917975	-5.84098	1	1	1
0.959641	-5.94292	1	1	1
1.00131	-5.86137	1	1	1
1.04297	-5.58614	1	1	1
1.08464	-5.76962	1	1	1
1.12631	-5.85117	1	1	1
1.16797	-6.01427	1	1	1
1.20964	-6.16718	1	1	1
1.25131	-6.32008	1	1	1
1.29297	-6.38124	1	1	1
1.33464	-6.16718	1	1	1
1.37631	-6.33028	1	1	1
1.41797	-6.46279	1	1	1
1.45964	-6.56473	1	1	1
1.50131	-6.64628	1	1	1
1.54297	-6.62589	1	1	1
1.58464	-6.69725	1	1	1
1.62631	-6.7686	1	1	1
1.66797	-6.74822	1	1	1
1.70964	-6.83996	1	1	1
1.75131	-6.85015	1	1	1
1.79297	-6.92151	1	1	1
1.83464	-6.97248	1	1	1
1.87631	-7.10499	1	1	1
1.91797	-7.15596	1	1	1
1.95964	-7.17635	1	1	1
2.00131	-7.27829	1	1	1
2.04297	-7.26809	1	1	1
2.08464	-7.45158	1	1	1
2.12631	-7.63507	1	1	1
2.16797	-7.75739	1	1	1
2.20964	-7.62487	1	1	1
2.25131	-7.85933	1	1	1
2.29297	-7.85933	1	1	1
2.33464	-7.97146	1	1	1
2.37631	-8.03262	1	1	1
2.41797	-8.12436	1	1	1
2.45964	-8.23649	1	1	1
2.50131	-8.28746	1	1	1
2.54297	-8.40979	1	1	1
2.58464	-8.35882	1	1	1
2.62631	-8.50153	1	1	1
2.66797	-8.51172	1	1	1
2.70964	-8.5525	1	1	1
2.75131	-8.61366	1	1	1
2.79297	-7.76758	1	1	1
2.83464	-7.88991	1	1	1
2.87631	-8.08359	1	1	1
2.91797	-8.21611	1	1	1
2.95964	-8.36901	1	1	1
3.00131	-8.51172	1	1	1
3.04297	-8.5525	1	1	1
3.08464	-8.80734	1	1	1
3.12631	-8.97044	1	1	1
3.16797	-9.14373	1	1	1
3.20964	-9.31702	1	1	1
3.25131	-9.50051	1	1	1
3.29297	-9.66361	1	1	1
3.33464	-9.79613	1	1	1
3.37631	-9.86748	1	1	1
3.41797	-10.0408	1	1	1
3.45964	-10.0815	1	1	1
3.50131	-10.1937	1	1	1
3.54297	-10.3466	1	1	1
3.58464	-10.4893	1	1	1
3.62631	-10.6524	1	1	1
3.66797	-10.6524	1	1	1
3.70964	-10.2141	1	1	1
3.75131	-10.4281	1	1	1
3.79297	-10.6422	1	1	1
3.83464	-10.8869	1	1	1
3.87631	-11.0805	1	1	1
3.91797	-11.3252	1	1	1
3.95964	-11.5392	1	1	1
4.00131	-11.7431	1	1	1
4.04297	-11.7023	1	1	1
4.08464	-11.9674	1	1	1
4.12631	-12.2222	1	1	1
4.16797	-12.4771	1	1	1
4.20964	-12.7829	1	1	1
4.25131	-13.0887	1	1	1
4.29297	-13.3945	1	1	1
4.33464	-13.7309	1	1	1
4.37631	-14.0469	1	1	1
4.41797	-14.3119	1	1	1
4.45964	-14.577	1	1	1
4.50131	-14.791	1	1	1
4.54297	-15.0663	1	1	1
4.58464	-15.3823	1	1	1
4.62631	-15.6779	1	1	1
4.66797	-15.8919	1	1	1
4.70964	-16.0856	1	1	1
4.75131	-16.3201	1	1	1
4.79297	-16.524	1	1	1
4.83464	-16.7686	1	1	1
4.87631	-17.054	1	1	1
4.91797	-17.3496	1	1	1
4.95964	-17.4414	1	1	1
5.00131	-17.788	1	1	1
5.04297	-18.1549	1	1	1
5.08464	-18.5525	1	1	1
5.12631	-18.9704	1	1	1
5.16797	-19.317	1	1	1
5.20964	-19.7655	1	1	1
5.25131	-20.1937	1	1	1
5.29297	-20.5912	1	1	1
5.33464	-20.9888	1	1	1
5.37631	-21.4373	1	1	1
5.41797	-21.8756	1	1	1
5.45964	-22.2936	1	1	1
5.50131	-22.7421	1	1	1
5.54297	-23.1702	1	1	1
5.58464	-23.6188	1	1	1
5.62631	-24.0571	1	1	1
5.66797	-24.4444	1	1	1
5.70964	-24.9541	1	1	1
5.75131	-25.2701	1	1	1
5.79297	-25.8104	1	1	1
5.83464	-26.2487	1	1	1
5.87631	-26.7176	1	1	1
5.91797	-27.2069	1	1	1
5.95964	-27.3089	1	1	1
6.00131	-27.8287	1	1	1
6.04297	-28.3282	1	1	1
6.08464	-28.736	1	1	1
6.12631	-29.3374	1	1	1
6.16797	-29.8981	1	1	1
6.20964	-30.4791	1	1	1
6.25131	-31.0907	1	1	1
6.29297	-31.7227	1	1	1
6.33464	-32.3751	1	1	1
6.37631	-32.9969	1	1	1
6.41797	-33.6901	1	1	1
6.45964	-34.3425	1	1	1
6.50131	-34.9949	1	1	1
6.54297	-35.6881	1	1	1
6.58464	-36.3507	1	1	1
6.62631	-37.0642	1	1	1
6.66797	-37.7166	1	1	1
6.70964	-38.3588	1	1	1
6.75131	-39.0214	1	1	1
6.79297	-39.633	1	1	1
6.83464	-40.2956	1	1	1
6.87631	-41.0092	1	1	1
6.91797	-41.7227	1	1	1
6.95964	-42.212	1	1	1
7.00131	-43.0887	1	1	1
7.04297	-43.9653	1	1	1
7.08464	-44.8012	1	1	1
7.12631	-45.8002	1	1	1
7.16797	-46.6972	1	1	1
7.20964	-47.5841	1	1	1
7.25131	-48.369	1	1	1
7.29297	-49.2355	1	1	1
7.33464	-50.1223	1	1	1
7.37631	-51.0805	1	1	1
7.41797	-52.0999	1	1	1
7.45964	-53.0989	1	1	1
7.50131	-54.1081	1	1	1
7.54297	-55.0866	1	1	1
7.58464	-56.0449	1	1	1
7.62631	-57.105	1	1	1
7.66797	-58.0734	1	1	1
7.70964	-59.1437	1	1	1
7.75131	-60.1427	1	1	1
7.79297	-61.2742	1	1	1
7.83464	-62.4567	1	1	1
7.87631	-63.7513	1	1	1
7.91797	-64.9541	1	1	1
7.95964	-66.055	1	1	1
8.00131	-67.3904	1	1	1
8.04297	-68.787	1	1	1
8.08464	-70.1835	1	1	1
8.12631	-71.6412	1	1	1
8.16797	-72.9867	1	1	1
8.20964	-74.3833	1	1	1
8.25131	-75.7492	1	1	1
8.29297	-77.1254	1	1	1
8.33464	-78.5219	1	1	1
8.37631	-79.9694	1	1	1
8.41797	-81.4067	1	1	1
8.45964	-82.9256	1	1	1
8.50131	-84.3833	1	1	1
8.54297	-85.8614	1	1	1
8.58464	-87.37	1	1	1
8.62631	-88.8889	1	1	1
8.66797	-90.3976	1	1	1
8.70964	-91.8756	1	1	1
8.75131	-93.3945	1	1	1
8.79297	-94.9949	1	1	1
8.83464	-96.4832	1	1	1
8.87631	-98.1957	1	1	1
8.91797	-99.7859	1	1	1
8.95964	-101.346	1	1	1
9.00131	-103.078	1	1	1
9.04297	-104.771	1	1	1
9.08464	-106.514	1	1	1
9.12631	-108.42	1	1	1
9.16797	-110.377	1	1	1
9.20964	-112.294	1	1	1
9.25131	-114.159	1	1	1
9.29297	-116.096	1	1	1
9.33464	-117.951	1	1	1
9.37631	-119.684	1	1	1
9.41797	-121.498	1	1	1
9.45964	-123.405	1	1	1
9.50131	-125.321	1	1	1
9.54297	-127.227	1	1	1
9.58464	-129.103	1	1	1
9.62631	-130.917	1	1	1
9.66797	-132.589	1	1	1
9.70964	-134.179	1	1	1
9.75131	-135.678	1	1	1
9.79297	-137.278	1	1	1
9.83464	-139.011	1	1	1
9.87631	-140.866	1	1	1
9.91797	-142.732	1	1	1
9.95964	-144.597	1	1	1
10.0013	-146.463	1	1	1
10.043	-148.471	1	1	1
10.0846	-150.377	1	1	1
10.1263	-152.202	1	1	1
10.168	-154.251	1	1	1
10.2096	-156.381	1	1	1
10.2513	-158.379	1	1	1
10.293	-160.438	1	1	1
10.3346	-162.416	1	1	1
10.3763	-164.373	1	1	1
10.418	-166.29	1	1	1
10.4596	-168.165	1	1	1
10.5013	-169.949	1	1	1
10.543	-171.723	1	1	1
10.5846	-173.435	1	1	1
10.6263	-175.046	1	1	1
10.668	-176.565	1	1	1
10.7096	-178.094	1	1	1
10.7513	-179.48	1	1	1
10.793	-181.03	1	1	1
10.8346	-182.457	1	1	1
10.8763	-183.833	1	1	1
10.918	-185.199	1	1	1
10.9596	-186.544	1	1	1
11.0013	-187.982	1	1	1
11.043	-189.348	1	1	1
11.0846	-190.571	1	1	1
11.1263	-192.09	1	1	1
11.168	-193.598	1	1	1
11.2096	-195.199	1	1	1
11.2513	-196.789	1	1	1
11.293	-198.308	1	1	1
11.3346	-199.766	1	1	1
11.3763	-201.376	1	1	1
11.418	-202.966	1	1	1
11.4596	-204.516	1	1	1
11.5013	-206.126	1	1	1
11.543	-207.655	1	1	1
11.5846	-209.266	1	1	1
11.6263	-210.826	1	1	1
11.668	-211.957	1	1	1
11.7096	-212.824	1	1	1
11.7513	-214.149	1	1	1
11.793	-215.505	1	1	1
11.8346	-216.993	1	1	1
11.8763	-218.552	1	1	1
11.918	-219.908	1	1	1
11.9596	-221.723	1	1	1
12.0013	-223.853	1	1	1
12.043	-225.882	1	1	1
12.0846	-227.727	1	1	1
12.1263	-229.786	1	1	1
12.168	-231.774	1	1	1
12.2096	-233.802	1	1	1
12.2513	-235.973	1	1	1
12.293	-238.114	1	1	1
12.3346	-239.939	1	1	1
12.3763	-242.436	1	1	1
12.418	-244.699	1	1	1
12.4596	-246.769	1	1	1
12.5013	-249.011	1	1	1
12.543	-251.254	1	1	1
12.5846	-253.547	1	1	1
12.6263	-255.892	1	1	1
12.668	-258.471	1	1	1
12.7096	-260.826	1	1	1
12.7513	-263.078	1	1	1
12.793	-265.28	1	1	1
12.8346	-267.941	1	1	1
12.8763	-270.581	1	1	1
12.918	-273.191	1	1	1
12.9596	-274.73	1	1	1
13.0013	-278.094	1	1	1
13.043	-281.549	1	1	1
13.0846	-285.025	1	1	1
13.1263	-288.522	1	1	1
13.168	-291.978	1	1	1
13.2096	-295.607	1	1	1
13.2513	-298.879	1	1	1
13.293	-303.099	1	1	1
13.3346	-307.023	1	1	1
13.3763	-311.284	1	1	1
13.418	-315.362	1	1	1
13.4596	-319.623	1	1	1
13.5013	-324.179	1	1	1
13.543	-329.134	1	1	1
13.5846	-333.833	1	1	1
13.6263	-339.429	1	1	1
13.668	-344.832	1	1	1
13.7096	-350.183	1	1	1
13.7513	-356.228	1	1	1
13.793	-362.385	1	1	1
13.8346	-369.704	1	1	1
13.8763	-376.993	1	1	1
13.918	-384.699	1	1	1
13.9596	-388.991	1	1	1
14.0013	-401.713	1	1	1
14.043	-412.385	1	1	1
14.0846	-411.417	1	1	1
14.1263	-437.88	1	1	1
14.168	-452.671	1	1	1
14.2096	-468.746	1	1	1
14.2513	-486.279	1	1	1
14.293	-505.566	1	1	1
14.3346	-526.3	1	1	1
14.3763	-551.539	1	1	1
14.418	-580.387	1	1	1
14.4596	-609.429	1	1	1
14.5013	-643.996	1	1	1
14.543	-682.222	1	1	1
14.5846	-728.43	1	1	1
14.6263	-785.8	1	1	1
14.668	-842.161	1	1	1
14.7096	-916.208	1	1	1
14.7513	-1017.75	1	1	1
14.793	-1128.7	1	1	1
14.8346	-1274.16	1	1	1
16.5083	-8970.44	1	1	1
0.637917	0.907975	2	0	100000
1.05686	0.872727	2	0	100000
1.64537	0.831405	2	0	100000
2.1731	0.797066	2	0	100000
2.67968	0.763678	2	0	100000
2.78552	0.756653	2	0	100000
3.02659	0.741612	2	0	100000
3.64894	0.701364	2	0	100000
4.02846	0.675992	2	0	100000
4.76911	0.62624	2	0	100000
5.15634	0.601405	2	0	100000
5.74909	0.560785	2	0	100000
6.08413	0.540083	2	0	100000
6.78737	0.497645	2	0	100000
7.12697	0.478388	2	0	100000
7.7795	0.443017	2	0	100000
8.15294	0.421653	2	0	100000
8.79176	0.387231	2	0	100000
9.18624	0.363678	2	0	100000
9.73198	0.333802	2	0	100000
10.1016	0.315165	2	0	100000
10.7344	0.281983	2	0	100000
11.0875	0.263017	2	0	100000
11.669	0.231653	2	0	100000
13.2383	0.169132	2	0	100000
13.8884	0.152851	2	0	100000
14.0847	0.147934	2	0	100000
14.7266	0.132975	2	0	100000
17.7681	0.0765702	2	0	100000

## Sheet: tens_interpolation
		Tension unten [hPa]	Tension oben [hPa]	Datum / Zeit
m_bot	b_bot	-0.33	2.14	41210.7
-8.64	356060	-0.39	2.09	41210.7
m_top	b_top	-0.3787	2.09942	41210.7
-7.2	296719	y = m*x+b
		AE unten [t]	AE oben [t]
		41227.2
