# Supplementary material for: A pore-size classification for peat bogs derived from unsaturated hydraulic properties
Source: Copernicus journal article supplement (doi:10.5194/hess-21-6185-2017), 2017-12-07
Supplement: Supplementary file 8 [file C2_HYDRUS_nAE_unten.xlsx]

## Sheet: Gewicht
Datum / Zeit	Brutto-Gewicht [g]	Netto-Gewicht [g]	Gewichtsänderung [g]	Zeit [d]	Theta [-]	Verdunstungsrate [cm/d]		Volumen	240
2012-10-28 16:26:55	802.18	244.68	0					Höhe	5
2012-10-29 07:47:12	789.85	232.35	-12.33	0.639086	0.900792	0.401941	0.256875	A	48
2012-10-29 17:50:33	781.74	224.24	-20.44	1.05808	0.867	0.403249	0.168958	Theta0	0.952167
2012-10-30 07:56:21	772.36	214.86	-29.82	1.64544	0.827917	0.332703	0.195417	Trockengewicht	16.16
2012-10-30 20:36:14	764.49	206.99	-37.69	2.17314	0.795125	0.310706	0.163958	Ks (as in Ksat)
2012-10-31 08:45:19	756.91	199.41	-45.27	2.67944	0.763542	0.311899	0.157917	delta System [g]	557.5
2012-10-31 11:45:39	754.99	197.49	-47.19	2.80468	0.755542	0.319409	0.04
2012-10-31 17:04:50	751.61	194.11	-50.57	3.02633	0.741458	0.317686	0.0704167
2012-11-01 08:01:00	741.91	184.41	-60.27	3.64867	0.701042	0.324716	0.202083
2012-11-01 17:07:05	735.84	178.34	-66.34	4.02789	0.67575	0.333466	0.126458
2012-11-02 10:54:06	722.43	164.93	-79.75	4.76888	0.619875	0.377033	0.279375
2012-11-02 20:11:35	715.94	158.44	-86.24	5.15602	0.592833	0.349248	0.135208
2012-11-03 10:25:01	705.17	147.67	-97.01	5.74868	0.547958	0.378588	0.224375
2012-11-03 18:27:49	699.81	142.31	-102.37	6.08396	0.525625	0.333057	0.111667
2012-11-04 11:20:35	688.26	130.76	-113.92	6.78727	0.4775	0.342132	0.240625
2012-11-04 19:28:59	683.22	125.72	-118.96	7.12644	0.4565	0.309582	0.105
2012-11-05 11:08:09	673.52	116.02	-128.66	7.77863	0.416083	0.309849	0.202083
2012-11-05 20:07:04	668.07	110.57	-134.11	8.15288	0.393375	0.303386	0.113542
2012-11-06 11:28:47	659.17	101.67	-143.01	8.79296	0.356292	0.289677	0.185417
2012-11-06 20:55:09	653.54	96.04	-148.64	9.18627	0.332833	0.298217	0.117292
2012-11-07 10:02:44	646.25	88.75	-155.93	9.73321	0.302458	0.277685	0.151875
2012-11-07 18:53:16	641.87	84.37	-160.31	10.1016	0.284208	0.247675	0.09125
2012-11-08 10:04:09	633.66	76.16	-168.52	10.7342	0.25	0.270397	0.171042
2012-11-08 18:32:47	629.56	72.06	-172.62	11.0874	0.232917	0.241824	0.0854167
2012-11-09 08:30:05	623.87	66.37	-178.31	11.6689	0.209208	0.20387	0.118542
2012-11-10 22:09:07	612.78	55.28	-189.4	13.2376	0.163	0.147275	0.231042
2012-11-11 13:45:52	609.51	52.01	-192.67	13.8882	0.149375	0.104724	0.068125
2012-11-11 18:28:51	608.54	51.04	-193.64	14.0847	0.145333	0.102833	0.0202083
2012-11-12 09:53:11	605.57	48.07	-196.61	14.7266	0.132958	0.0963938	0.061875
2012-11-15 03:49:39	594.395	36.8954	-208.98	17.4741	0.0863974	0.0847318	0.232805

## Sheet: Tensionen
Datum / Zeit	Tension unten [hPa]	Tension oben [hPa]		Zeit [d]	MP bot(2) [cm]	MP top(1) [cm]	Auswahl	WÄGUNG START
2012-10-26 17:39:39	-1.13	1.55		-1.94949	1.15189	-1.58002		41210.7	-1.75331
2012-10-26 17:40:39	-0.98	1.72		-1.9488	0.998981	-1.75331		2012-10-28 16:26:55
2012-10-26 17:41:39	-1.02	1.66		-1.9481	1.03976	-1.69215
2012-10-26 17:42:39	-1.03	1.64		-1.94741	1.04995	-1.67176
2012-10-26 17:43:39	-1.05	1.63		-1.94671	1.07034	-1.66157
2012-10-26 17:44:39	-1.04	1.63		-1.94602	1.06014	-1.66157
2012-10-26 17:45:39	-1.04	1.64		-1.94532	1.06014	-1.67176
2012-10-26 17:46:39	-1.04	1.63		-1.94463	1.06014	-1.66157
2012-10-26 17:47:39	-1.04	1.63		-1.94394	1.06014	-1.66157
2012-10-26 17:48:39	-1.04	1.64		-1.94324	1.06014	-1.67176
2012-10-26 17:49:39	-1.04	1.64		-1.94255	1.06014	-1.67176
2012-10-26 17:50:39	-1.03	1.64		-1.94185	1.04995	-1.67176
2012-10-26 17:51:39	-1.03	1.64		-1.94116	1.04995	-1.67176
2012-10-26 17:52:39	-1.03	1.64		-1.94046	1.04995	-1.67176
2012-10-26 17:53:39	-1.03	1.63		-1.93977	1.04995	-1.66157
2012-10-26 17:54:39	-1.03	1.64		-1.93907	1.04995	-1.67176
2012-10-26 17:55:39	-1.03	1.63		-1.93838	1.04995	-1.66157
2012-10-26 17:56:39	-1.04	1.63		-1.93769	1.06014	-1.66157
2012-10-26 17:57:39	-1.03	1.63		-1.93699	1.04995	-1.66157
2012-10-26 17:58:39	-1.03	1.64		-1.9363	1.04995	-1.67176
2012-10-26 17:59:39	-1.03	1.65		-1.9356	1.04995	-1.68196
2012-10-26 18:00:39	-1.02	1.63		-1.93491	1.03976	-1.66157
2012-10-26 18:01:39	-1.02	1.64		-1.93421	1.03976	-1.67176
2012-10-26 18:02:39	-1.02	1.64		-1.93352	1.03976	-1.67176
2012-10-26 18:03:39	-1.01	1.65		-1.93282	1.02956	-1.68196
2012-10-26 18:04:39	-1.01	1.65		-1.93213	1.02956	-1.68196
2012-10-26 18:05:39	-1.01	1.66		-1.93144	1.02956	-1.69215
2012-10-26 18:06:39	-1.02	1.66		-1.93074	1.03976	-1.69215
2012-10-26 18:07:39	-1.02	1.64		-1.93005	1.03976	-1.67176
2012-10-26 18:08:39	-1.01	1.65		-1.92935	1.02956	-1.68196
2012-10-26 18:09:39	-1.01	1.65		-1.92866	1.02956	-1.68196
2012-10-26 18:10:39	-1	1.65		-1.92796	1.01937	-1.68196
2012-10-26 18:11:39	-1	1.66		-1.92727	1.01937	-1.69215
2012-10-26 18:12:39	-0.99	1.66		-1.92657	1.00917	-1.69215
2012-10-26 18:13:39	-1.06	1.61		-1.92588	1.08053	-1.64118
2012-10-26 18:14:39	-1	1.67		-1.92519	1.01937	-1.70234
2012-10-26 18:15:39	-0.99	1.67		-1.92449	1.00917	-1.70234
2012-10-26 18:16:39	-0.98	1.68		-1.9238	0.998981	-1.71254
2012-10-26 18:17:39	-1.22	1.44		-1.9231	1.24363	-1.46789
2012-10-26 18:18:39	-1.21	1.45		-1.92241	1.23344	-1.47808
2012-10-26 18:19:39	-1.19	1.47		-1.92171	1.21305	-1.49847
2012-10-26 18:20:39	-1.19	1.47		-1.92102	1.21305	-1.49847
2012-10-26 18:21:39	-1.17	1.47		-1.92032	1.19266	-1.49847
2012-10-26 18:22:39	-1.17	1.49		-1.91963	1.19266	-1.51886
2012-10-26 18:23:39	-1.16	1.49		-1.91894	1.18247	-1.51886
2012-10-26 18:24:39	-1.16	1.49		-1.91824	1.18247	-1.51886
2012-10-26 18:25:39	-1.14	1.5		-1.91755	1.16208	-1.52905
2012-10-26 18:26:39	-1.14	1.51		-1.91685	1.16208	-1.53925
2012-10-26 18:27:39	-1.13	1.51		-1.91616	1.15189	-1.53925
2012-10-26 18:28:39	-1.14	1.52		-1.91546	1.16208	-1.54944
2012-10-26 18:29:39	-1.13	1.52		-1.91477	1.15189	-1.54944
2012-10-26 18:30:39	-1.12	1.52		-1.91407	1.14169	-1.54944
2012-10-26 18:31:39	-1.12	1.53		-1.91338	1.14169	-1.55963
2012-10-26 18:32:39	-1.12	1.53		-1.91269	1.14169	-1.55963
2012-10-26 18:33:39	-1.11	1.53		-1.91199	1.1315	-1.55963
2012-10-26 18:34:39	-1.11	1.54		-1.9113	1.1315	-1.56983
2012-10-26 18:35:39	-1.09	1.55		-1.9106	1.11111	-1.58002
2012-10-26 18:36:39	-1.09	1.55		-1.90991	1.11111	-1.58002
2012-10-26 18:37:39	-1.09	1.56		-1.90921	1.11111	-1.59021
2012-10-26 18:38:39	-1.08	1.57		-1.90852	1.10092	-1.60041
2012-10-26 18:39:39	-1.08	1.57		-1.90782	1.10092	-1.60041
2012-10-26 18:49:39	-1.05	1.6		-1.90088	1.07034	-1.63099
2012-10-26 18:59:39	-1.01	1.62		-1.89394	1.02956	-1.65138
2012-10-26 19:09:39	-0.97	1.65		-1.88699	0.988787	-1.68196
2012-10-26 19:19:39	-0.99	1.63		-1.88005	1.00917	-1.66157
2012-10-26 19:29:39	-0.96	1.67		-1.8731	0.978593	-1.70234
2012-10-26 19:39:39	-0.95	1.66		-1.86616	0.9684	-1.69215
2012-10-26 19:49:39	-1	1.61		-1.85921	1.01937	-1.64118
2012-10-26 19:59:39	-0.98	1.62		-1.85227	0.998981	-1.65138
2012-10-26 20:09:39	-1	1.59		-1.84532	1.01937	-1.6208
2012-10-26 20:19:39	-0.96	1.63		-1.83838	0.978593	-1.66157
2012-10-26 20:29:39	-0.97	1.62		-1.83144	0.988787	-1.65138
2012-10-26 20:39:39	-0.96	1.63		-1.82449	0.978593	-1.66157
2012-10-26 20:49:39	-0.94	1.64		-1.81755	0.958206	-1.67176
2012-10-26 20:59:39	-0.92	1.66		-1.8106	0.937819	-1.69215
2012-10-26 21:09:39	-0.89	1.68		-1.80366	0.907238	-1.71254
2012-10-26 21:19:39	-0.87	1.7		-1.79671	0.88685	-1.73293
2012-10-26 21:29:39	-0.88	1.68		-1.78977	0.897044	-1.71254
2012-10-26 21:39:39	-0.86	1.7		-1.78282	0.876656	-1.73293
2012-10-26 21:49:39	-0.84	1.72		-1.77588	0.856269	-1.75331
2012-10-26 21:59:39	-0.86	1.68		-1.76894	0.876656	-1.71254
2012-10-26 22:09:39	-0.84	1.71		-1.76199	0.856269	-1.74312
2012-10-26 22:19:39	-0.8	1.74		-1.75505	0.815494	-1.7737
2012-10-26 22:29:39	-0.83	1.72		-1.7481	0.846075	-1.75331
2012-10-26 22:39:39	-0.78	1.76		-1.74116	0.795107	-1.79409
2012-10-26 22:49:39	-0.78	1.75		-1.73421	0.795107	-1.78389
2012-10-26 22:59:39	-0.74	1.79		-1.72727	0.754332	-1.82467
2012-10-26 23:09:39	-0.74	1.79		-1.72032	0.754332	-1.82467
2012-10-26 23:19:39	-0.74	1.78		-1.71338	0.754332	-1.81448
2012-10-26 23:29:39	-0.7	1.81		-1.70644	0.713558	-1.84506
2012-10-26 23:39:39	-0.7	1.82		-1.69949	0.713558	-1.85525
2012-10-26 23:49:39	-0.67	1.84		-1.69255	0.682977	-1.87564
2012-10-26 23:59:39	-0.65	1.86		-1.6856	0.662589	-1.89602
2012-10-27 00:09:39	-0.64	1.87		-1.67866	0.652396	-1.90622
2012-10-27 00:19:39	-0.62	1.88		-1.67171	0.632008	-1.91641
2012-10-27 00:29:39	-0.62	1.88		-1.66477	0.632008	-1.91641
2012-10-27 00:39:39	-0.61	1.88		-1.65782	0.621814	-1.91641
2012-10-27 00:49:39	-0.59	1.9		-1.65088	0.601427	-1.9368
2012-10-27 00:59:39	-0.56	1.93		-1.64394	0.570846	-1.96738
2012-10-27 01:09:39	-0.6	1.89		-1.63699	0.611621	-1.92661
2012-10-27 01:19:39	-0.55	1.92		-1.63005	0.560652	-1.95719
2012-10-27 01:29:39	-0.52	1.94		-1.6231	0.530071	-1.97757
2012-10-27 01:39:39	-0.57	1.91		-1.61616	0.58104	-1.94699
2012-10-27 01:49:39	-0.54	1.93		-1.60921	0.550459	-1.96738
2012-10-27 01:59:39	-0.56	1.91		-1.60227	0.570846	-1.94699
2012-10-27 02:09:39	-0.52	1.95		-1.59532	0.530071	-1.98777
2012-10-27 02:19:39	-0.48	1.98		-1.58838	0.489297	-2.01835
2012-10-27 02:29:39	-0.5	1.95		-1.58144	0.509684	-1.98777
2012-10-27 02:39:39	-0.46	2		-1.57449	0.468909	-2.03874
2012-10-27 02:49:39	-0.44	2.02		-1.56755	0.448522	-2.05912
2012-10-27 02:59:39	-0.42	2.04		-1.5606	0.428135	-2.07951
2012-10-27 03:09:39	-0.39	2.06		-1.55366	0.397554	-2.0999
2012-10-27 03:19:39	-0.39	2.07		-1.54671	0.397554	-2.11009
2012-10-27 03:29:39	-0.37	2.09		-1.53977	0.377166	-2.13048
2012-10-27 03:39:39	-0.37	2.09		-1.53282	0.377166	-2.13048
2012-10-27 03:49:39	-0.38	2.07		-1.52588	0.38736	-2.11009
2012-10-27 03:59:39	-0.35	2.1		-1.51894	0.356779	-2.14067
2012-10-27 04:09:39	-0.34	2.1		-1.51199	0.346585	-2.14067
2012-10-27 04:19:39	-0.35	2.11		-1.50505	0.356779	-2.15087
2012-10-27 04:29:39	-0.34	2.12		-1.4981	0.346585	-2.16106
2012-10-27 04:39:39	-0.32	2.13		-1.49116	0.326198	-2.17125
2012-10-27 04:49:39	-0.31	2.15		-1.48421	0.316004	-2.19164
2012-10-27 04:59:39	-0.35	2.12		-1.47727	0.356779	-2.16106
2012-10-27 05:09:39	-0.36	2.09		-1.47032	0.366972	-2.13048
2012-10-27 05:19:39	-0.36	2.08		-1.46338	0.366972	-2.12029
2012-10-27 05:29:39	-0.33	2.13		-1.45644	0.336391	-2.17125
2012-10-27 05:39:39	-0.3	2.16		-1.44949	0.30581	-2.20183
2012-10-27 05:49:39	-0.31	2.15		-1.44255	0.316004	-2.19164
2012-10-27 05:59:39	-0.29	2.16		-1.4356	0.295617	-2.20183
2012-10-27 06:09:39	-0.29	2.16		-1.42866	0.295617	-2.20183
2012-10-27 06:19:39	-0.26	2.19		-1.42171	0.265036	-2.23242
2012-10-27 06:29:39	-0.24	2.21		-1.41477	0.244648	-2.2528
2012-10-27 06:39:39	-0.24	2.22		-1.40782	0.244648	-2.263
2012-10-27 06:49:39	-0.35	2.11		-1.40088	0.356779	-2.15087
2012-10-27 06:59:39	-0.3	2.15		-1.39394	0.30581	-2.19164
2012-10-27 07:09:39	-0.27	2.19		-1.38699	0.275229	-2.23242
2012-10-27 07:19:39	-0.23	2.22		-1.38005	0.234455	-2.263
2012-10-27 07:29:39	-0.21	2.24		-1.3731	0.214067	-2.28338
2012-10-27 07:39:39	-0.23	2.23		-1.36616	0.234455	-2.27319
2012-10-27 07:49:39	-0.19	2.25		-1.35921	0.19368	-2.29358
2012-10-27 07:59:39	-0.17	2.27		-1.35227	0.173293	-2.31397
2012-10-27 08:09:39	-0.2	2.25		-1.34532	0.203874	-2.29358
2012-10-27 08:19:39	-0.17	2.28		-1.33838	0.173293	-2.32416
2012-10-27 08:29:39	-0.17	2.28		-1.33144	0.173293	-2.32416
2012-10-27 08:39:39	-0.17	2.27		-1.32449	0.173293	-2.31397
2012-10-27 08:49:39	-0.15	2.29		-1.31755	0.152905	-2.33435
2012-10-27 08:59:39	-0.14	2.3		-1.3106	0.142712	-2.34455
2012-10-27 09:09:39	-0.14	2.3		-1.30366	0.142712	-2.34455
2012-10-27 09:19:39	-0.14	2.31		-1.29671	0.142712	-2.35474
2012-10-27 09:29:39	-0.16	2.29		-1.28977	0.163099	-2.33435
2012-10-27 09:39:39	-0.13	2.31		-1.28282	0.132518	-2.35474
2012-10-27 09:49:39	-0.12	2.33		-1.27588	0.122324	-2.37513
2012-10-27 09:59:39	-0.11	2.34		-1.26894	0.11213	-2.38532
2012-10-27 10:09:39	-0.1	2.35		-1.26199	0.101937	-2.39551
2012-10-27 10:19:39	-0.09	2.36		-1.25505	0.0917431	-2.40571
2012-10-27 10:29:39	-0.08	2.37		-1.2481	0.0815494	-2.4159
2012-10-27 10:39:39	-0.07	2.37		-1.24116	0.0713558	-2.4159
2012-10-27 10:49:39	-0.07	2.37		-1.23421	0.0713558	-2.4159
2012-10-27 10:59:39	-0.07	2.37		-1.22727	0.0713558	-2.4159
2012-10-27 11:09:39	-0.06	2.39		-1.22032	0.0611621	-2.43629
2012-10-27 11:19:39	-0.04	2.41		-1.21338	0.0407747	-2.45668
2012-10-27 11:29:39	-0.03	2.41		-1.20644	0.030581	-2.45668
2012-10-27 11:39:39	-0.02	2.42		-1.19949	0.0203874	-2.46687
2012-10-27 11:49:39	-0.01	2.43		-1.19255	0.0101937	-2.47706
2012-10-27 11:59:39	0.01	2.45		-1.1856	-0.0101937	-2.49745
2012-10-27 12:09:39	-0.03	2.42		-1.17866	0.030581	-2.46687
2012-10-27 12:19:39	0	2.45		-1.17171	0	-2.49745
2012-10-27 12:29:39	0.01	2.46		-1.16477	-0.0101937	-2.50765
2012-10-27 12:39:39	0.02	2.46		-1.15782	-0.0203874	-2.50765
2012-10-27 12:49:39	0.01	2.45		-1.15088	-0.0101937	-2.49745
2012-10-27 12:59:39	0.03	2.47		-1.14394	-0.030581	-2.51784
2012-10-27 13:09:39	0.03	2.46		-1.13699	-0.030581	-2.50765
2012-10-27 13:19:39	0.05	2.49		-1.13005	-0.0509684	-2.53823
2012-10-27 13:29:39	0.05	2.49		-1.1231	-0.0509684	-2.53823
2012-10-27 13:39:39	0.04	2.48		-1.11616	-0.0407747	-2.52803
2012-10-27 13:49:39	0.03	2.48		-1.10921	-0.030581	-2.52803
2012-10-27 13:59:39	0	2.46		-1.10227	0	-2.50765
2012-10-27 14:09:39	0.02	2.47		-1.09532	-0.0203874	-2.51784
2012-10-27 14:19:39	0.05	2.48		-1.08838	-0.0509684	-2.52803
2012-10-27 14:29:39	0.03	2.47		-1.08144	-0.030581	-2.51784
2012-10-27 14:39:39	0.05	2.49		-1.07449	-0.0509684	-2.53823
2012-10-27 14:49:39	0.05	2.49		-1.06755	-0.0509684	-2.53823
2012-10-27 14:59:39	0.03	2.48		-1.0606	-0.030581	-2.52803
2012-10-27 15:09:39	0.03	2.46		-1.05366	-0.030581	-2.50765
2012-10-27 15:19:39	0.05	2.49		-1.04671	-0.0509684	-2.53823
2012-10-27 15:29:39	0.06	2.5		-1.03977	-0.0611621	-2.54842
2012-10-27 15:39:39	-0.02	2.42		-1.03282	0.0203874	-2.46687
2012-10-27 15:49:39	0	2.45		-1.02588	0	-2.49745
2012-10-27 15:59:39	0.02	2.46		-1.01894	-0.0203874	-2.50765
2012-10-27 16:09:39	0.02	2.47		-1.01199	-0.0203874	-2.51784
2012-10-27 16:19:39	-0.18	2.27		-1.00505	0.183486	-2.31397
2012-10-27 16:29:39	-0.19	2.5		-0.998102	0.19368	-2.54842
2012-10-27 16:39:39	-2.17	0.28		-0.991157	2.21203	-0.285423
2012-10-27 16:49:39	-2.05	0.37		-0.984213	2.0897	-0.377166
2012-10-27 16:59:39	-2.15	0.26		-0.977269	2.19164	-0.265036
2012-10-27 17:09:39	-2.04	0.38		-0.970324	2.07951	-0.38736
2012-10-27 17:19:39	-2	0.43		-0.96338	2.03874	-0.438328
2012-10-27 17:29:39	-1.98	0.44		-0.956435	2.01835	-0.448522
2012-10-27 17:39:39	-1.97	0.47		-0.949491	2.00815	-0.479103
2012-10-27 17:49:39	-1.95	0.48		-0.942546	1.98777	-0.489297
2012-10-27 17:59:39	-1.94	0.5		-0.935602	1.97757	-0.509684
2012-10-27 18:09:39	-1.93	0.51		-0.928657	1.96738	-0.519878
2012-10-27 18:19:39	-1.91	0.54		-0.921713	1.94699	-0.550459
2012-10-27 18:29:39	-1.88	0.56		-0.914769	1.91641	-0.570846
2012-10-27 18:39:39	-1.87	0.58		-0.907824	1.90622	-0.591233
2012-10-27 18:49:39	-1.86	0.59		-0.90088	1.89602	-0.601427
2012-10-27 18:59:39	-1.86	0.59		-0.893935	1.89602	-0.601427
2012-10-27 19:09:39	-1.83	0.61		-0.886991	1.86544	-0.621814
2012-10-27 19:19:39	-1.82	0.63		-0.880046	1.85525	-0.642202
2012-10-27 19:29:39	-1.8	0.66		-0.873102	1.83486	-0.672783
2012-10-27 19:39:39	-1.8	0.66		-0.866157	1.83486	-0.672783
2012-10-27 19:49:39	-1.77	0.69		-0.859213	1.80428	-0.703364
2012-10-27 19:59:39	-1.83	0.63		-0.852269	1.86544	-0.642202
2012-10-27 20:09:39	-1.79	0.66		-0.845324	1.82467	-0.672783
2012-10-27 20:19:39	-1.77	0.69		-0.83838	1.80428	-0.703364
2012-10-27 20:29:39	-1.76	0.7		-0.831435	1.79409	-0.713558
2012-10-27 20:39:39	-1.8	0.67		-0.824491	1.83486	-0.682977
2012-10-27 20:49:39	-1.76	0.7		-0.817546	1.79409	-0.713558
2012-10-27 20:59:39	-1.73	0.73		-0.810602	1.76351	-0.744139
2012-10-27 21:09:39	-1.7	0.75		-0.803657	1.73293	-0.764526
2012-10-27 21:19:39	-1.69	0.77		-0.796713	1.72273	-0.784913
2012-10-27 21:29:39	-1.75	0.7		-0.789769	1.78389	-0.713558
2012-10-27 21:39:39	-1.71	0.75		-0.782824	1.74312	-0.764526
2012-10-27 21:49:39	-1.68	0.78		-0.77588	1.71254	-0.795107
2012-10-27 21:59:39	-1.66	0.8		-0.768935	1.69215	-0.815494
2012-10-27 22:09:39	-1.65	0.82		-0.761991	1.68196	-0.835882
2012-10-27 22:19:39	-1.64	0.82		-0.755046	1.67176	-0.835882
2012-10-27 22:29:39	-1.64	0.83		-0.748102	1.67176	-0.846075
2012-10-27 22:39:39	-1.64	0.82		-0.741157	1.67176	-0.835882
2012-10-27 22:49:39	-1.62	0.85		-0.734213	1.65138	-0.866463
2012-10-27 22:59:39	-1.6	0.86		-0.727269	1.63099	-0.876656
2012-10-27 23:09:39	-1.61	0.86		-0.720324	1.64118	-0.876656
2012-10-27 23:19:39	-1.59	0.88		-0.71338	1.6208	-0.897044
2012-10-27 23:29:39	-1.6	0.87		-0.706435	1.63099	-0.88685
2012-10-27 23:39:39	-1.58	0.9		-0.699491	1.6106	-0.917431
2012-10-27 23:49:39	-1.6	0.87		-0.692546	1.63099	-0.88685
2012-10-27 23:59:39	-1.58	0.9		-0.685602	1.6106	-0.917431
2012-10-28 00:09:39	-1.58	0.89		-0.678657	1.6106	-0.907238
2012-10-28 00:19:39	-1.56	0.91		-0.671713	1.59021	-0.927625
2012-10-28 00:29:39	-1.56	0.92		-0.664769	1.59021	-0.937819
2012-10-28 00:39:39	-1.55	0.92		-0.657824	1.58002	-0.937819
2012-10-28 00:49:39	-1.53	0.94		-0.65088	1.55963	-0.958206
2012-10-28 00:59:39	-1.51	0.96		-0.643935	1.53925	-0.978593
2012-10-28 01:09:39	-1.5	0.97		-0.636991	1.52905	-0.988787
2012-10-28 01:19:39	-1.49	0.98		-0.630046	1.51886	-0.998981
2012-10-28 01:29:39	-1.48	0.99		-0.623102	1.50866	-1.00917
2012-10-28 01:39:39	-1.48	1		-0.616157	1.50866	-1.01937
2012-10-28 01:49:39	-1.46	1.01		-0.609213	1.48828	-1.02956
2012-10-28 01:59:39	-1.44	1.03		-0.602269	1.46789	-1.04995
2012-10-28 02:09:39	-1.44	1.03		-0.595324	1.46789	-1.04995
2012-10-28 02:19:39	-1.43	1.05		-0.58838	1.4577	-1.07034
2012-10-28 02:29:39	-1.43	1.05		-0.581435	1.4577	-1.07034
2012-10-28 02:39:39	-1.42	1.06		-0.574491	1.4475	-1.08053
2012-10-28 02:49:39	-1.4	1.08		-0.567546	1.42712	-1.10092
2012-10-28 02:59:39	-1.4	1.09		-0.560602	1.42712	-1.11111
2012-10-28 03:09:39	-1.32	1.17		-0.553657	1.34557	-1.19266
2012-10-28 03:19:39	-1.31	1.18		-0.546713	1.33537	-1.20285
2012-10-28 03:29:39	-1.29	1.2		-0.539769	1.31498	-1.22324
2012-10-28 03:39:39	-1.28	1.21		-0.532824	1.30479	-1.23344
2012-10-28 03:49:39	-1.27	1.21		-0.52588	1.2946	-1.23344
2012-10-28 03:59:39	-1.25	1.24		-0.518935	1.27421	-1.26402
2012-10-28 04:09:39	-1.26	1.23		-0.511991	1.2844	-1.25382
2012-10-28 04:19:39	-1.24	1.25		-0.505046	1.26402	-1.27421
2012-10-28 04:29:39	-1.24	1.25		-0.498102	1.26402	-1.27421
2012-10-28 04:39:39	-1.22	1.28		-0.491157	1.24363	-1.30479
2012-10-28 04:49:39	-1.2	1.3		-0.484213	1.22324	-1.32518
2012-10-28 04:59:39	-1.2	1.3		-0.477269	1.22324	-1.32518
2012-10-28 05:09:39	-1.19	1.3		-0.470324	1.21305	-1.32518
2012-10-28 05:19:39	-1.17	1.32		-0.46338	1.19266	-1.34557
2012-10-28 05:29:39	-1.16	1.34		-0.456435	1.18247	-1.36595
2012-10-28 05:39:39	-1.16	1.34		-0.449491	1.18247	-1.36595
2012-10-28 05:49:39	-1.13	1.36		-0.442546	1.15189	-1.38634
2012-10-28 05:59:39	-1.12	1.37		-0.435602	1.14169	-1.39653
2012-10-28 06:09:39	-1.1	1.38		-0.428657	1.1213	-1.40673
2012-10-28 06:19:39	-1.09	1.4		-0.421713	1.11111	-1.42712
2012-10-28 06:29:39	-1.09	1.41		-0.414769	1.11111	-1.43731
2012-10-28 06:39:39	-1.31	1.18		-0.407824	1.33537	-1.20285
2012-10-28 06:49:39	-1.27	1.23		-0.40088	1.2946	-1.25382
2012-10-28 06:59:39	-1.24	1.25		-0.393935	1.26402	-1.27421
2012-10-28 07:09:39	-1.21	1.28		-0.386991	1.23344	-1.30479
2012-10-28 07:19:39	-1.19	1.3		-0.380046	1.21305	-1.32518
2012-10-28 07:29:39	-1.16	1.32		-0.373102	1.18247	-1.34557
2012-10-28 07:39:39	-1.14	1.34		-0.366157	1.16208	-1.36595
2012-10-28 07:49:39	-1.13	1.36		-0.359213	1.15189	-1.38634
2012-10-28 07:59:39	-1.11	1.38		-0.352269	1.1315	-1.40673
2012-10-28 08:09:39	-1.09	1.39		-0.345324	1.11111	-1.41692
2012-10-28 08:19:39	-1.08	1.41		-0.33838	1.10092	-1.43731
2012-10-28 08:29:39	-1.06	1.43		-0.331435	1.08053	-1.4577
2012-10-28 08:39:39	-1.05	1.44		-0.324491	1.07034	-1.46789
2012-10-28 08:49:39	-1.07	1.43		-0.317546	1.09072	-1.4577
2012-10-28 08:59:39	-1.05	1.44		-0.310602	1.07034	-1.46789
2012-10-28 09:09:39	-1.03	1.45		-0.303657	1.04995	-1.47808
2012-10-28 09:19:39	-1.03	1.46		-0.296713	1.04995	-1.48828
2012-10-28 09:29:39	-1.01	1.47		-0.289769	1.02956	-1.49847
2012-10-28 09:39:39	-1	1.48		-0.282824	1.01937	-1.50866
2012-10-28 09:49:39	-0.99	1.49		-0.27588	1.00917	-1.51886
2012-10-28 09:59:39	-0.98	1.51		-0.268935	0.998981	-1.53925
2012-10-28 10:09:39	-0.97	1.51		-0.261991	0.988787	-1.53925
2012-10-28 10:19:39	-1.01	1.47		-0.255046	1.02956	-1.49847
2012-10-28 10:29:39	-0.98	1.49		-0.248102	0.998981	-1.51886
2012-10-28 10:39:39	-0.97	1.51		-0.241157	0.988787	-1.53925
2012-10-28 10:49:39	-0.95	1.53		-0.234213	0.9684	-1.55963
2012-10-28 10:59:39	-0.96	1.53		-0.227269	0.978593	-1.55963
2012-10-28 11:09:39	-0.95	1.53		-0.220324	0.9684	-1.55963
2012-10-28 11:19:39	-0.94	1.54		-0.21338	0.958206	-1.56983
2012-10-28 11:29:39	-0.92	1.56		-0.206435	0.937819	-1.59021
2012-10-28 11:39:39	-0.75	1.73		-0.199491	0.764526	-1.76351
2012-10-28 11:49:39	-0.76	1.72		-0.192546	0.77472	-1.75331
2012-10-28 11:59:39	-0.75	1.72		-0.185602	0.764526	-1.75331
2012-10-28 12:09:39	-0.75	1.74		-0.178657	0.764526	-1.7737
2012-10-28 12:19:39	-0.73	1.74		-0.171713	0.744139	-1.7737
2012-10-28 12:29:39	-0.72	1.77		-0.164769	0.733945	-1.80428
2012-10-28 12:39:39	-0.71	1.77		-0.157824	0.723751	-1.80428
2012-10-28 12:49:39	-0.7	1.78		-0.15088	0.713558	-1.81448
2012-10-28 12:59:39	-0.69	1.78		-0.143935	0.703364	-1.81448
2012-10-28 13:09:39	-0.68	1.8		-0.136991	0.69317	-1.83486
2012-10-28 13:19:39	-0.67	1.8		-0.130046	0.682977	-1.83486
2012-10-28 13:29:39	-0.66	1.81		-0.123102	0.672783	-1.84506
2012-10-28 13:39:39	-0.73	1.74		-0.116157	0.744139	-1.7737
2012-10-28 13:49:39	-0.7	1.76		-0.109213	0.713558	-1.79409
2012-10-28 13:59:39	-0.68	1.78		-0.102269	0.69317	-1.81448
2012-10-28 14:09:39	-0.67	1.8		-0.0953241	0.682977	-1.83486
2012-10-28 14:19:39	-0.72	1.75		-0.0883796	0.733945	-1.78389
2012-10-28 14:29:39	-0.69	1.77		-0.0814352	0.703364	-1.80428
2012-10-28 14:39:39	-0.68	1.79		-0.0744907	0.69317	-1.82467
2012-10-28 14:49:39	-0.66	1.8		-0.0675463	0.672783	-1.83486
2012-10-28 14:59:39	-0.66	1.8		-0.0606019	0.672783	-1.83486
2012-10-28 15:09:39	-0.65	1.81		-0.0536574	0.662589	-1.84506
2012-10-28 15:19:39	-0.64	1.82		-0.046713	0.652396	-1.85525
2012-10-28 15:29:39	-0.67	1.79		-0.0397685	0.682977	-1.82467
2012-10-28 15:39:39	-0.64	1.81		-0.0328241	0.652396	-1.84506
2012-10-28 15:49:39	-0.64	1.82		-0.0258796	0.652396	-1.85525
2012-10-28 15:59:39	-0.7	1.76		-0.0189352	0.713558	-1.79409
2012-10-28 16:09:39	-1.03	1.42		-0.0119907	1.04995	-1.4475
2012-10-28 16:19:39	-0.92	1.54		-0.0050463	0.937819	-1.56983
2012-10-28 16:29:39	-0.83	1.63		0.00189815	0.846075	-1.66157	2012-10-28 16:29:39
2012-10-28 16:39:39	-0.67	1.77		0.00884259	0.682977	-1.80428
2012-10-28 16:49:39	-0.57	1.87		0.015787	0.58104	-1.90622
2012-10-28 16:59:39	-0.47	1.95		0.0227315	0.479103	-1.98777
2012-10-28 17:09:39	-0.44	2		0.0296759	0.448522	-2.03874
2012-10-28 17:19:39	-0.39	2.05		0.0366204	0.397554	-2.0897
2012-10-28 17:29:39	-0.32	2.11		0.0435648	0.326198	-2.15087	2012-10-28 17:29:39
2012-10-28 17:39:39	-0.28	2.15		0.0505093	0.285423	-2.19164
2012-10-28 17:49:39	-0.2	2.23		0.0574537	0.203874	-2.27319
2012-10-28 17:59:39	-0.14	2.3		0.0643981	0.142712	-2.34455
2012-10-28 18:09:39	-0.08	2.35		0.0713426	0.0815494	-2.39551
2012-10-28 18:19:39	-0.02	2.42		0.078287	0.0203874	-2.46687
2012-10-28 18:29:39	-0.1	2.33		0.0852315	0.101937	-2.37513	2012-10-28 18:29:39
2012-10-28 18:39:39	-0.01	2.43		0.0921759	0.0101937	-2.47706
2012-10-28 18:49:39	0.09	2.53		0.0991204	-0.0917431	-2.579
2012-10-28 18:59:39	0.1	2.54		0.106065	-0.101937	-2.58919
2012-10-28 19:09:39	0.17	2.63		0.113009	-0.173293	-2.68094
2012-10-28 19:19:39	0.22	2.68		0.119954	-0.224261	-2.73191
2012-10-28 19:29:39	0.23	2.69		0.126898	-0.234455	-2.7421	2012-10-28 19:29:39
2012-10-28 19:39:39	0.28	2.73		0.133843	-0.285423	-2.78287
2012-10-28 19:49:39	0.33	2.78		0.140787	-0.336391	-2.83384
2012-10-28 19:59:39	0.37	2.82		0.147731	-0.377166	-2.87462
2012-10-28 20:09:39	0.39	2.85		0.154676	-0.397554	-2.9052
2012-10-28 20:19:39	0.4	2.86		0.16162	-0.407747	-2.91539
2012-10-28 20:29:39	0.44	2.9		0.168565	-0.448522	-2.95617	2012-10-28 20:29:39
2012-10-28 20:39:39	0.5	2.96		0.175509	-0.509684	-3.01733
2012-10-28 20:49:39	0.55	3.01		0.182454	-0.560652	-3.0683
2012-10-28 20:59:39	0.57	3.03		0.189398	-0.58104	-3.08869
2012-10-28 21:09:39	0.58	3.04		0.196343	-0.591233	-3.09888
2012-10-28 21:19:39	0.63	3.09		0.203287	-0.642202	-3.14985
2012-10-28 21:29:39	0.6	3.05		0.210231	-0.611621	-3.10907	2012-10-28 21:29:39
2012-10-28 21:39:39	0.68	3.14		0.217176	-0.69317	-3.20082
2012-10-28 21:49:39	0.72	3.19		0.22412	-0.733945	-3.25178
2012-10-28 21:59:39	0.75	3.21		0.231065	-0.764526	-3.27217
2012-10-28 22:09:39	0.8	3.26		0.238009	-0.815494	-3.32314
2012-10-28 22:19:39	0.57	3.03		0.244954	-0.58104	-3.08869
2012-10-28 22:29:39	0.69	3.15		0.251898	-0.703364	-3.21101	2012-10-28 22:29:39
2012-10-28 22:39:39	0.8	3.27		0.258843	-0.815494	-3.33333
2012-10-28 22:49:39	0.73	3.2		0.265787	-0.744139	-3.26198
2012-10-28 22:59:39	0.83	3.3		0.272731	-0.846075	-3.36391
2012-10-28 23:09:39	0.79	3.25		0.279676	-0.805301	-3.31295
2012-10-28 23:19:39	0.87	3.33		0.28662	-0.88685	-3.3945
2012-10-28 23:29:39	0.81	3.28		0.293565	-0.825688	-3.34353	2012-10-28 23:29:39
2012-10-28 23:39:39	0.91	3.39		0.300509	-0.927625	-3.45566
2012-10-28 23:49:39	0.95	3.43		0.307454	-0.9684	-3.49643
2012-10-28 23:59:39	1	3.48		0.314398	-1.01937	-3.5474
2012-10-29 00:09:39	0.99	3.46		0.321343	-1.00917	-3.52701
2012-10-29 00:19:39	0.95	3.42		0.328287	-0.9684	-3.48624
2012-10-29 00:29:39	1.02	3.5		0.335231	-1.03976	-3.56779	2012-10-29 00:29:39
2012-10-29 00:39:39	0.93	3.41		0.342176	-0.948012	-3.47604
2012-10-29 00:49:39	1.04	3.52		0.34912	-1.06014	-3.58818
2012-10-29 00:59:39	1.08	3.55		0.356065	-1.10092	-3.61876
2012-10-29 01:09:39	1.11	3.59		0.363009	-1.1315	-3.65953
2012-10-29 01:19:39	1.14	3.61		0.369954	-1.16208	-3.67992
2012-10-29 01:29:39	1.17	3.64		0.376898	-1.19266	-3.7105	2012-10-29 01:29:39
2012-10-29 01:39:39	1.2	3.68		0.383843	-1.22324	-3.75127
2012-10-29 01:49:39	1.23	3.71		0.390787	-1.25382	-3.78186
2012-10-29 01:59:39	1.26	3.73		0.397731	-1.2844	-3.80224
2012-10-29 02:09:39	1.28	3.75		0.404676	-1.30479	-3.82263
2012-10-29 02:19:39	1.3	3.77		0.41162	-1.32518	-3.84302
2012-10-29 02:29:39	1.32	3.8		0.418565	-1.34557	-3.8736	2012-10-29 02:29:39
2012-10-29 02:39:39	1.36	3.84		0.425509	-1.38634	-3.91437
2012-10-29 02:49:39	1.36	3.84		0.432454	-1.38634	-3.91437
2012-10-29 02:59:39	1.41	3.89		0.439398	-1.43731	-3.96534
2012-10-29 03:09:39	1.45	3.92		0.446343	-1.47808	-3.99592
2012-10-29 03:19:39	1.47	3.95		0.453287	-1.49847	-4.0265
2012-10-29 03:29:39	1.44	3.92		0.460231	-1.46789	-3.99592	2012-10-29 03:29:39
2012-10-29 03:39:39	1.45	3.92		0.467176	-1.47808	-3.99592
2012-10-29 03:49:39	1.48	3.96		0.47412	-1.50866	-4.0367
2012-10-29 03:59:39	1.51	3.98		0.481065	-1.53925	-4.05708
2012-10-29 04:09:39	1.49	3.97		0.488009	-1.51886	-4.04689
2012-10-29 04:19:39	1.52	3.99		0.494954	-1.54944	-4.06728
2012-10-29 04:29:39	1.52	4.01		0.501898	-1.54944	-4.08767	2012-10-29 04:29:39
2012-10-29 04:39:39	1.56	4.03		0.508843	-1.59021	-4.10805
2012-10-29 04:49:39	1.59	4.07		0.515787	-1.6208	-4.14883
2012-10-29 04:59:39	1.6	4.07		0.522731	-1.63099	-4.14883
2012-10-29 05:09:39	1.63	4.1		0.529676	-1.66157	-4.17941
2012-10-29 05:19:39	1.64	4.12		0.53662	-1.67176	-4.1998
2012-10-29 05:29:39	1.59	4.08		0.543565	-1.6208	-4.15902	2012-10-29 05:29:39
2012-10-29 05:39:39	1.67	4.15		0.550509	-1.70234	-4.23038
2012-10-29 05:49:39	1.71	4.18		0.557454	-1.74312	-4.26096
2012-10-29 05:59:39	1.75	4.22		0.564398	-1.78389	-4.30173
2012-10-29 06:09:39	1.74	4.22		0.571343	-1.7737	-4.30173
2012-10-29 06:19:39	1.79	4.27		0.578287	-1.82467	-4.3527
2012-10-29 06:29:39	1.8	4.28		0.585231	-1.83486	-4.3629	2012-10-29 06:29:39
2012-10-29 06:39:39	1.84	4.32		0.592176	-1.87564	-4.40367
2012-10-29 06:49:39	1.87	4.34		0.59912	-1.90622	-4.42406
2012-10-29 06:59:39	1.89	4.36		0.606065	-1.92661	-4.44444
2012-10-29 07:09:39	1.89	4.37		0.613009	-1.92661	-4.45464
2012-10-29 07:19:39	1.86	4.35		0.619954	-1.89602	-4.43425
2012-10-29 07:29:39	1.9	4.37		0.626898	-1.9368	-4.45464	2012-10-29 07:29:39
2012-10-29 07:39:39	1.92	4.39		0.633843	-1.95719	-4.47503
2012-10-29 07:49:39	1.51	4		0.640787	-1.53925	-4.07747
2012-10-29 07:59:39	1.58	4.09		0.647731	-1.6106	-4.16922
2012-10-29 08:09:39	1.68	4.15		0.654676	-1.71254	-4.23038
2012-10-29 08:19:39	1.74	4.22		0.66162	-1.7737	-4.30173
2012-10-29 08:29:39	1.81	4.29		0.668565	-1.84506	-4.37309	2012-10-29 08:29:39
2012-10-29 08:39:39	1.89	4.37		0.675509	-1.92661	-4.45464
2012-10-29 08:49:39	1.94	4.41		0.682454	-1.97757	-4.49541
2012-10-29 08:59:39	1.95	4.42		0.689398	-1.98777	-4.50561
2012-10-29 09:09:39	1.98	4.45		0.696343	-2.01835	-4.53619
2012-10-29 09:19:39	1.98	4.45		0.703287	-2.01835	-4.53619
2012-10-29 09:29:39	2.01	4.48		0.710231	-2.04893	-4.56677	2012-10-29 09:29:39
2012-10-29 09:39:39	2.03	4.5		0.717176	-2.06932	-4.58716
2012-10-29 09:49:39	2.03	4.5		0.72412	-2.06932	-4.58716
2012-10-29 09:59:39	2.07	4.55		0.731065	-2.11009	-4.63812
2012-10-29 10:09:39	2.08	4.55		0.738009	-2.12029	-4.63812
2012-10-29 10:19:39	2.05	4.53		0.744954	-2.0897	-4.61774
2012-10-29 10:29:39	2.1	4.57		0.751898	-2.14067	-4.65851	2012-10-29 10:29:39
2012-10-29 10:39:39	2.09	4.56		0.758843	-2.13048	-4.64832
2012-10-29 10:49:39	2.14	4.61		0.765787	-2.18145	-4.69929
2012-10-29 10:59:39	2.16	4.63		0.772731	-2.20183	-4.71967
2012-10-29 11:09:39	2.19	4.65		0.779676	-2.23242	-4.74006
2012-10-29 11:19:39	2.21	4.67		0.78662	-2.2528	-4.76045
2012-10-29 11:29:39	2.23	4.7		0.793565	-2.27319	-4.79103	2012-10-29 11:29:39
2012-10-29 11:39:39	2.26	4.72		0.800509	-2.30377	-4.81142
2012-10-29 11:49:39	2.26	4.72		0.807454	-2.30377	-4.81142
2012-10-29 11:59:39	2.27	4.74		0.814398	-2.31397	-4.8318
2012-10-29 12:09:39	2.31	4.76		0.821343	-2.35474	-4.85219
2012-10-29 12:19:39	2.28	4.74		0.828287	-2.32416	-4.8318
2012-10-29 12:29:39	2.28	4.74		0.835231	-2.32416	-4.8318	2012-10-29 12:29:39
2012-10-29 12:39:39	2.32	4.78		0.842176	-2.36493	-4.87258
2012-10-29 12:49:39	2.38	4.83		0.84912	-2.4261	-4.92355
2012-10-29 12:59:39	2.39	4.85		0.856065	-2.43629	-4.94393
2012-10-29 13:09:39	2.42	4.87		0.863009	-2.46687	-4.96432
2012-10-29 13:19:39	2.43	4.89		0.869954	-2.47706	-4.98471
2012-10-29 13:29:39	2.45	4.91		0.876898	-2.49745	-5.0051	2012-10-29 13:29:39
2012-10-29 13:39:39	2.47	4.93		0.883843	-2.51784	-5.02548
2012-10-29 13:49:39	2.49	4.95		0.890787	-2.53823	-5.04587
2012-10-29 13:59:39	2.47	4.93		0.897731	-2.51784	-5.02548
2012-10-29 14:09:39	2.51	4.97		0.904676	-2.55861	-5.06626
2012-10-29 14:19:39	2.54	5		0.91162	-2.58919	-5.09684
2012-10-29 14:29:39	2.57	5.03		0.918565	-2.61978	-5.12742	2012-10-29 14:29:39
2012-10-29 14:39:39	2.56	5.01		0.925509	-2.60958	-5.10703
2012-10-29 14:49:39	2.57	5.03		0.932454	-2.61978	-5.12742
2012-10-29 14:59:39	2.6	5.06		0.939398	-2.65036	-5.158
2012-10-29 15:09:39	2.63	5.1		0.946343	-2.68094	-5.19878
2012-10-29 15:19:39	2.66	5.12		0.953287	-2.71152	-5.21916
2012-10-29 15:29:39	2.68	5.14		0.960231	-2.73191	-5.23955	2012-10-29 15:29:39
2012-10-29 15:39:39	2.71	5.16		0.967176	-2.76249	-5.25994
2012-10-29 15:49:39	2.73	5.19		0.97412	-2.78287	-5.29052
2012-10-29 15:59:39	2.75	5.21		0.981065	-2.80326	-5.31091
2012-10-29 16:09:39	2.75	5.21		0.988009	-2.80326	-5.31091
2012-10-29 16:19:39	2.74	5.19		0.994954	-2.79307	-5.29052
2012-10-29 16:29:39	2.76	5.21		1.0019	-2.81346	-5.31091	2012-10-29 16:29:39
2012-10-29 16:39:39	2.79	5.24		1.00884	-2.84404	-5.34149
2012-10-29 16:49:39	2.8	5.26		1.01579	-2.85423	-5.36188
2012-10-29 16:59:39	2.81	5.27		1.02273	-2.86442	-5.37207
2012-10-29 17:09:39	2.84	5.3		1.02968	-2.89501	-5.40265
2012-10-29 17:19:39	2.86	5.32		1.03662	-2.91539	-5.42304
2012-10-29 17:29:39	2.88	5.34		1.04356	-2.93578	-5.44343	2012-10-29 17:29:39
2012-10-29 17:39:39	2.88	5.33		1.05051	-2.93578	-5.43323
2012-10-29 17:49:39	2.91	5.37		1.05745	-2.96636	-5.47401
2012-10-29 17:59:39	2.7	5.17		1.0644	-2.75229	-5.27013
2012-10-29 18:09:39	2.75	5.22		1.07134	-2.80326	-5.3211
2012-10-29 18:19:39	2.79	5.27		1.07829	-2.84404	-5.37207
2012-10-29 18:29:39	2.86	5.32		1.08523	-2.91539	-5.42304	2012-10-29 18:29:39
2012-10-29 18:39:39	2.88	5.35		1.09218	-2.93578	-5.45362
2012-10-29 18:49:39	2.94	5.4		1.09912	-2.99694	-5.50459
2012-10-29 18:59:39	2.94	5.39		1.10606	-2.99694	-5.49439
2012-10-29 19:09:39	2.96	5.42		1.11301	-3.01733	-5.52497
2012-10-29 19:19:39	2.99	5.44		1.11995	-3.04791	-5.54536
2012-10-29 19:29:39	3.01	5.47		1.1269	-3.0683	-5.57594	2012-10-29 19:29:39
2012-10-29 19:39:39	3.03	5.49		1.13384	-3.08869	-5.59633
2012-10-29 19:49:39	2.98	5.45		1.14079	-3.03772	-5.55556
2012-10-29 19:59:39	3.03	5.49		1.14773	-3.08869	-5.59633
2012-10-29 20:09:39	3.05	5.52		1.15468	-3.10907	-5.62691
2012-10-29 20:19:39	3.07	5.54		1.16162	-3.12946	-5.6473
2012-10-29 20:29:39	3.08	5.54		1.16856	-3.13965	-5.6473	2012-10-29 20:29:39
2012-10-29 20:39:39	3.09	5.56		1.17551	-3.14985	-5.66769
2012-10-29 20:49:39	3.11	5.58		1.18245	-3.17023	-5.68807
2012-10-29 20:59:39	3.13	5.6		1.1894	-3.19062	-5.70846
2012-10-29 21:09:39	3.14	5.61		1.19634	-3.20082	-5.71865
2012-10-29 21:19:39	3.16	5.62		1.20329	-3.2212	-5.72885
2012-10-29 21:29:39	3.16	5.63		1.21023	-3.2212	-5.73904	2012-10-29 21:29:39
2012-10-29 21:39:39	3.19	5.65		1.21718	-3.25178	-5.75943
2012-10-29 21:49:39	3.16	5.63		1.22412	-3.2212	-5.73904
2012-10-29 21:59:39	3.19	5.66		1.23106	-3.25178	-5.76962
2012-10-29 22:09:39	3.2	5.67		1.23801	-3.26198	-5.77982
2012-10-29 22:19:39	3.22	5.7		1.24495	-3.28236	-5.8104
2012-10-29 22:29:39	3.25	5.71		1.2519	-3.31295	-5.82059	2012-10-29 22:29:39
2012-10-29 22:39:39	2.95	5.43		1.25884	-3.00714	-5.53517
2012-10-29 22:49:39	2.97	5.44		1.26579	-3.02752	-5.54536
2012-10-29 22:59:39	3.01	5.49		1.27273	-3.0683	-5.59633
2012-10-29 23:09:39	3.06	5.53		1.27968	-3.11927	-5.6371
2012-10-29 23:19:39	3.02	5.49		1.28662	-3.07849	-5.59633
2012-10-29 23:29:39	3.05	5.53		1.29356	-3.10907	-5.6371	2012-10-29 23:29:39
2012-10-29 23:39:39	3.08	5.55		1.30051	-3.13965	-5.65749
2012-10-29 23:49:39	3.11	5.58		1.30745	-3.17023	-5.68807
2012-10-29 23:59:39	3.07	5.55		1.3144	-3.12946	-5.65749
2012-10-30 00:09:39	3.07	5.55		1.32134	-3.12946	-5.65749
2012-10-30 00:19:39	3.07	5.55		1.32829	-3.12946	-5.65749
2012-10-30 00:29:39	3.04	5.51		1.33523	-3.09888	-5.61672	2012-10-30 00:29:39
2012-10-30 00:39:39	3.02	5.5		1.34218	-3.07849	-5.60652
2012-10-30 00:49:39	3.01	5.48		1.34912	-3.0683	-5.58614
2012-10-30 00:59:39	3.01	5.49		1.35606	-3.0683	-5.59633
2012-10-30 01:09:39	3.01	5.49		1.36301	-3.0683	-5.59633
2012-10-30 01:19:39	3.06	5.54		1.36995	-3.11927	-5.6473
2012-10-30 01:29:39	3.12	5.59		1.3769	-3.18043	-5.69827	2012-10-30 01:29:39
2012-10-30 01:39:39	3.14	5.61		1.38384	-3.20082	-5.71865
2012-10-30 01:49:39	3.15	5.62		1.39079	-3.21101	-5.72885
2012-10-30 01:59:39	3.18	5.66		1.39773	-3.24159	-5.76962
2012-10-30 02:09:39	3.19	5.68		1.40468	-3.25178	-5.79001
2012-10-30 02:19:39	3.22	5.7		1.41162	-3.28236	-5.8104
2012-10-30 02:29:39	3.1	5.63		1.41856	-3.16004	-5.73904	2012-10-30 02:29:39
2012-10-30 02:39:39	3.15	5.63		1.42551	-3.21101	-5.73904
2012-10-30 02:49:39	3.2	5.67		1.43245	-3.26198	-5.77982
2012-10-30 02:59:39	3.23	5.7		1.4394	-3.29256	-5.8104
2012-10-30 03:09:39	3.26	5.72		1.44634	-3.32314	-5.83078
2012-10-30 03:19:39	3.27	5.74		1.45329	-3.33333	-5.85117
2012-10-30 03:29:39	3.27	5.74		1.46023	-3.33333	-5.85117	2012-10-30 03:29:39
2012-10-30 03:39:39	3.28	5.77		1.46718	-3.34353	-5.88175
2012-10-30 03:49:39	3.31	5.79		1.47412	-3.37411	-5.90214
2012-10-30 03:59:39	3.31	5.78		1.48106	-3.37411	-5.89195
2012-10-30 04:09:39	3.33	5.8		1.48801	-3.3945	-5.91233
2012-10-30 04:19:39	3.3	5.78		1.49495	-3.36391	-5.89195
2012-10-30 04:29:39	3.33	5.8		1.5019	-3.3945	-5.91233	2012-10-30 04:29:39
2012-10-30 04:39:39	3.36	5.83		1.50884	-3.42508	-5.94292
2012-10-30 04:49:39	3.36	5.84		1.51579	-3.42508	-5.95311
2012-10-30 04:59:39	3.36	5.85		1.52273	-3.42508	-5.9633
2012-10-30 05:09:39	3.38	5.86		1.52968	-3.44546	-5.9735
2012-10-30 05:19:39	3.39	5.86		1.53662	-3.45566	-5.9735
2012-10-30 05:29:39	3.39	5.87		1.54356	-3.45566	-5.98369	2012-10-30 05:29:39
2012-10-30 05:39:39	3.41	5.9		1.55051	-3.47604	-6.01427
2012-10-30 05:49:39	3.41	5.89		1.55745	-3.47604	-6.00408
2012-10-30 05:59:39	3.43	5.91		1.5644	-3.49643	-6.02446
2012-10-30 06:09:39	3.39	5.86		1.57134	-3.45566	-5.9735
2012-10-30 06:19:39	3.43	5.91		1.57829	-3.49643	-6.02446
2012-10-30 06:29:39	3.45	5.92		1.58523	-3.51682	-6.03466	2012-10-30 06:29:39
2012-10-30 06:39:39	3.41	5.9		1.59218	-3.47604	-6.01427
2012-10-30 06:49:39	3.37	5.84		1.59912	-3.43527	-5.95311
2012-10-30 06:59:39	3.26	5.74		1.60606	-3.32314	-5.85117
2012-10-30 07:09:39	3.28	5.76		1.61301	-3.34353	-5.87156
2012-10-30 07:19:39	3.32	5.81		1.61995	-3.3843	-5.92253
2012-10-30 07:29:39	3.38	5.86		1.6269	-3.44546	-5.9735	2012-10-30 07:29:39
2012-10-30 07:39:39	3.41	5.88		1.63384	-3.47604	-5.99388
2012-10-30 07:49:39	3.45	5.94		1.64079	-3.51682	-6.05505
2012-10-30 07:59:39	3.03	5.51		1.64773	-3.08869	-5.61672
2012-10-30 08:09:39	3.08	5.55		1.65468	-3.13965	-5.65749
2012-10-30 08:19:39	3.12	5.59		1.66162	-3.18043	-5.69827
2012-10-30 08:29:39	3.14	5.62		1.66856	-3.20082	-5.72885	2012-10-30 08:29:39
2012-10-30 08:39:39	3.18	5.66		1.67551	-3.24159	-5.76962
2012-10-30 08:49:39	3.2	5.69		1.68245	-3.26198	-5.8002
2012-10-30 08:59:39	3.24	5.71		1.6894	-3.30275	-5.82059
2012-10-30 09:09:39	3.28	5.75		1.69634	-3.34353	-5.86137
2012-10-30 09:19:39	3.32	5.78		1.70329	-3.3843	-5.89195
2012-10-30 09:29:39	3.34	5.82		1.71023	-3.40469	-5.93272	2012-10-30 09:29:39
2012-10-30 09:39:39	3.32	5.81		1.71718	-3.3843	-5.92253
2012-10-30 09:49:39	3.36	5.84		1.72412	-3.42508	-5.95311
2012-10-30 09:59:39	3.38	5.86		1.73106	-3.44546	-5.9735
2012-10-30 10:09:39	3.38	5.87		1.73801	-3.44546	-5.98369
2012-10-30 10:19:39	3.41	5.89		1.74495	-3.47604	-6.00408
2012-10-30 10:29:39	3.43	5.9		1.7519	-3.49643	-6.01427	2012-10-30 10:29:39
2012-10-30 10:39:39	3.45	5.93		1.75884	-3.51682	-6.04485
2012-10-30 10:49:39	3.47	5.94		1.76579	-3.53721	-6.05505
2012-10-30 10:59:39	3.48	5.95		1.77273	-3.5474	-6.06524
2012-10-30 11:09:39	3.5	5.98		1.77968	-3.56779	-6.09582
2012-10-30 11:19:39	3.49	5.98		1.78662	-3.55759	-6.09582
2012-10-30 11:29:39	3.5	5.97		1.79356	-3.56779	-6.08563	2012-10-30 11:29:39
2012-10-30 11:39:39	3.52	5.99		1.80051	-3.58818	-6.10601
2012-10-30 11:49:39	3.49	5.97		1.80745	-3.55759	-6.08563
2012-10-30 11:59:39	3.46	5.94		1.8144	-3.52701	-6.05505
2012-10-30 12:09:39	3.51	5.99		1.82134	-3.57798	-6.10601
2012-10-30 12:19:39	3.52	5.99		1.82829	-3.58818	-6.10601
2012-10-30 12:29:39	3.54	6.01		1.83523	-3.60856	-6.1264	2012-10-30 12:29:39
2012-10-30 12:39:39	3.53	6.02		1.84218	-3.59837	-6.1366
2012-10-30 12:49:39	3.57	6.05		1.84912	-3.63914	-6.16718
2012-10-30 12:59:39	3.58	6.06		1.85606	-3.64934	-6.17737
2012-10-30 13:09:39	3.59	6.07		1.86301	-3.65953	-6.18756
2012-10-30 13:19:39	3.6	6.07		1.86995	-3.66972	-6.18756
2012-10-30 13:29:39	3.62	6.09		1.8769	-3.69011	-6.20795	2012-10-30 13:29:39
2012-10-30 13:39:39	3.62	6.09		1.88384	-3.69011	-6.20795
2012-10-30 13:49:39	3.63	6.11		1.89079	-3.70031	-6.22834
2012-10-30 13:59:39	3.63	6.11		1.89773	-3.70031	-6.22834
2012-10-30 14:09:39	3.65	6.13		1.90468	-3.72069	-6.24873
2012-10-30 14:19:39	3.62	6.1		1.91162	-3.69011	-6.21814
2012-10-30 14:29:39	3.65	6.12		1.91856	-3.72069	-6.23853	2012-10-30 14:29:39
2012-10-30 14:39:39	3.63	6.12		1.92551	-3.70031	-6.23853
2012-10-30 14:49:39	3.63	6.1		1.93245	-3.70031	-6.21814
2012-10-30 14:59:39	3.67	6.13		1.9394	-3.74108	-6.24873
2012-10-30 15:09:39	3.67	6.14		1.94634	-3.74108	-6.25892
2012-10-30 15:19:39	3.67	6.14		1.95329	-3.74108	-6.25892
2012-10-30 15:29:39	3.68	6.16		1.96023	-3.75127	-6.27931	2012-10-30 15:29:39
2012-10-30 15:39:39	3.71	6.18		1.96718	-3.78186	-6.29969
2012-10-30 15:49:39	3.71	6.19		1.97412	-3.78186	-6.30989
2012-10-30 15:59:39	3.72	6.2		1.98106	-3.79205	-6.32008
2012-10-30 16:09:39	3.74	6.2		1.98801	-3.81244	-6.32008
2012-10-30 16:19:39	3.75	6.23		1.99495	-3.82263	-6.35066
2012-10-30 16:29:39	3.73	6.21		2.0019	-3.80224	-6.33028	2012-10-30 16:29:39
2012-10-30 16:39:39	3.76	6.23		2.00884	-3.83282	-6.35066
2012-10-30 16:49:39	3.76	6.23		2.01579	-3.83282	-6.35066
2012-10-30 16:59:39	3.79	6.26		2.02273	-3.8634	-6.38124
2012-10-30 17:09:39	3.8	6.27		2.02968	-3.8736	-6.39144
2012-10-30 17:19:39	3.82	6.28		2.03662	-3.89399	-6.40163
2012-10-30 17:29:39	3.83	6.29		2.04356	-3.90418	-6.41182	2012-10-30 17:29:39
2012-10-30 17:39:39	3.83	6.31		2.05051	-3.90418	-6.43221
2012-10-30 17:49:39	3.86	6.33		2.05745	-3.93476	-6.4526
2012-10-30 17:59:39	3.8	6.27		2.0644	-3.8736	-6.39144
2012-10-30 18:09:39	3.86	6.32		2.07134	-3.93476	-6.44241
2012-10-30 18:19:39	3.86	6.32		2.07829	-3.93476	-6.44241
2012-10-30 18:29:39	3.88	6.35		2.08523	-3.95515	-6.47299	2012-10-30 18:29:39
2012-10-30 18:39:39	3.87	6.33		2.09218	-3.94495	-6.4526
2012-10-30 18:49:39	3.89	6.36		2.09912	-3.96534	-6.48318
2012-10-30 18:59:39	3.91	6.37		2.10606	-3.98573	-6.49337
2012-10-30 19:09:39	3.92	6.38		2.11301	-3.99592	-6.50357
2012-10-30 19:19:39	3.93	6.41		2.11995	-4.00612	-6.53415
2012-10-30 19:29:39	3.94	6.42		2.1269	-4.01631	-6.54434	2012-10-30 19:29:39
2012-10-30 19:39:39	3.96	6.43		2.13384	-4.0367	-6.55454
2012-10-30 19:49:39	3.97	6.44		2.14079	-4.04689	-6.56473
2012-10-30 19:59:39	3.96	6.44		2.14773	-4.0367	-6.56473
2012-10-30 20:09:39	3.99	6.46		2.15468	-4.06728	-6.58512
2012-10-30 20:19:39	4.01	6.48		2.16162	-4.08767	-6.6055
2012-10-30 20:29:39	4.02	6.49		2.16856	-4.09786	-6.6157	2012-10-30 20:29:39
2012-10-30 20:39:39	3.88	6.37		2.17551	-3.95515	-6.49337
2012-10-30 20:49:39	3.94	6.42		2.18245	-4.01631	-6.54434
2012-10-30 20:59:39	3.99	6.46		2.1894	-4.06728	-6.58512
2012-10-30 21:09:39	4	6.49		2.19634	-4.07747	-6.6157
2012-10-30 21:19:39	4.03	6.51		2.20329	-4.10805	-6.63609
2012-10-30 21:29:39	4.06	6.54		2.21023	-4.13863	-6.66667	2012-10-30 21:29:39
2012-10-30 21:39:39	4.07	6.55		2.21718	-4.14883	-6.67686
2012-10-30 21:49:39	4.08	6.56		2.22412	-4.15902	-6.68705
2012-10-30 21:59:39	4.1	6.58		2.23106	-4.17941	-6.70744
2012-10-30 22:09:39	4.12	6.6		2.23801	-4.1998	-6.72783
2012-10-30 22:19:39	4.1	6.6		2.24495	-4.17941	-6.72783
2012-10-30 22:29:39	4.15	6.63		2.2519	-4.23038	-6.75841	2012-10-30 22:29:39
2012-10-30 22:39:39	4.15	6.64		2.25884	-4.23038	-6.7686
2012-10-30 22:49:39	4.18	6.66		2.26579	-4.26096	-6.78899
2012-10-30 22:59:39	4.18	6.66		2.27273	-4.26096	-6.78899
2012-10-30 23:09:39	4.2	6.68		2.27968	-4.28135	-6.80938
2012-10-30 23:19:39	4.2	6.68		2.28662	-4.28135	-6.80938
2012-10-30 23:29:39	4.22	6.7		2.29356	-4.30173	-6.82977	2012-10-30 23:29:39
2012-10-30 23:39:39	4.23	6.71		2.30051	-4.31193	-6.83996
2012-10-30 23:49:39	4.24	6.72		2.30745	-4.32212	-6.85015
2012-10-30 23:59:39	4.25	6.73		2.3144	-4.33231	-6.86035
2012-10-31 00:09:39	4.27	6.75		2.32134	-4.3527	-6.88073
2012-10-31 00:19:39	4.28	6.76		2.32829	-4.3629	-6.89093
2012-10-31 00:29:39	4.29	6.78		2.33523	-4.37309	-6.91131	2012-10-31 00:29:39
2012-10-31 00:39:39	4.29	6.77		2.34218	-4.37309	-6.90112
2012-10-31 00:49:39	4.31	6.79		2.34912	-4.39348	-6.92151
2012-10-31 00:59:39	4.32	6.8		2.35606	-4.40367	-6.9317
2012-10-31 01:09:39	4.33	6.8		2.36301	-4.41386	-6.9317
2012-10-31 01:19:39	4.35	6.83		2.36995	-4.43425	-6.96228
2012-10-31 01:29:39	4.37	6.85		2.3769	-4.45464	-6.98267	2012-10-31 01:29:39
2012-10-31 01:39:39	4.39	6.87		2.38384	-4.47503	-7.00306
2012-10-31 01:49:39	4.4	6.88		2.39079	-4.48522	-7.01325
2012-10-31 01:59:39	4.4	6.88		2.39773	-4.48522	-7.01325
2012-10-31 02:09:39	4.41	6.9		2.40468	-4.49541	-7.03364
2012-10-31 02:19:39	4.43	6.92		2.41162	-4.5158	-7.05403
2012-10-31 02:29:39	4.45	6.93		2.41856	-4.53619	-7.06422	2012-10-31 02:29:39
2012-10-31 02:39:39	4.36	6.85		2.42551	-4.44444	-6.98267
2012-10-31 02:49:39	4.42	6.89		2.43245	-4.50561	-7.02345
2012-10-31 02:59:39	4.43	6.92		2.4394	-4.5158	-7.05403
2012-10-31 03:09:39	4.46	6.94		2.44634	-4.54638	-7.07441
2012-10-31 03:19:39	4.46	6.95		2.45329	-4.54638	-7.08461
2012-10-31 03:29:39	4.48	6.96		2.46023	-4.56677	-7.0948	2012-10-31 03:29:39
2012-10-31 03:39:39	4.49	6.98		2.46718	-4.57696	-7.11519
2012-10-31 03:49:39	4.5	6.99		2.47412	-4.58716	-7.12538
2012-10-31 03:59:39	4.53	7		2.48106	-4.61774	-7.13558
2012-10-31 04:09:39	4.52	7.01		2.48801	-4.60754	-7.14577
2012-10-31 04:19:39	4.52	7		2.49495	-4.60754	-7.13558
2012-10-31 04:29:39	4.54	7.02		2.5019	-4.62793	-7.15596	2012-10-31 04:29:39
2012-10-31 04:39:39	4.53	7.03		2.50884	-4.61774	-7.16616
2012-10-31 04:49:39	4.56	7.05		2.51579	-4.64832	-7.18654
2012-10-31 04:59:39	4.57	7.05		2.52273	-4.65851	-7.18654
2012-10-31 05:09:39	4.58	7.07		2.52968	-4.66871	-7.20693
2012-10-31 05:19:39	4.58	7.07		2.53662	-4.66871	-7.20693
2012-10-31 05:29:39	4.6	7.09		2.54356	-4.68909	-7.22732	2012-10-31 05:29:39
2012-10-31 05:39:39	4.62	7.1		2.55051	-4.70948	-7.23751
2012-10-31 05:49:39	4.64	7.12		2.55745	-4.72987	-7.2579
2012-10-31 05:59:39	4.67	7.13		2.5644	-4.76045	-7.26809
2012-10-31 06:09:39	4.67	7.14		2.57134	-4.76045	-7.27829
2012-10-31 06:19:39	4.7	7.16		2.57829	-4.79103	-7.29867
2012-10-31 06:29:39	4.7	7.16		2.58523	-4.79103	-7.29867	2012-10-31 06:29:39
2012-10-31 06:39:39	4.73	7.19		2.59218	-4.82161	-7.32926
2012-10-31 06:49:39	4.74	7.2		2.59912	-4.8318	-7.33945
2012-10-31 06:59:39	4.76	7.21		2.60606	-4.85219	-7.34964
2012-10-31 07:09:39	4.75	7.21		2.61301	-4.842	-7.34964
2012-10-31 07:19:39	4.77	7.22		2.61995	-4.86239	-7.35984
2012-10-31 07:29:39	4.78	7.23		2.6269	-4.87258	-7.37003	2012-10-31 07:29:39
2012-10-31 07:39:39	4.79	7.25		2.63384	-4.88277	-7.39042
2012-10-31 07:49:39	4.82	7.25		2.64079	-4.91335	-7.39042
2012-10-31 07:59:39	4.84	7.28		2.64773	-4.93374	-7.421
2012-10-31 08:09:39	4.83	7.29		2.65468	-4.92355	-7.43119
2012-10-31 08:19:39	4.83	7.28		2.66162	-4.92355	-7.421
2012-10-31 08:29:39	4.86	7.31		2.66856	-4.95413	-7.45158	2012-10-31 08:29:39
2012-10-31 08:39:39	4.88	7.33		2.67551	-4.97452	-7.47197
2012-10-31 08:49:39	4.78	7.24		2.68245	-4.87258	-7.38022
2012-10-31 08:59:39	4.83	7.29		2.6894	-4.92355	-7.43119
2012-10-31 09:09:39	4.88	7.34		2.69634	-4.97452	-7.48216
2012-10-31 09:19:39	4.91	7.36		2.70329	-5.0051	-7.50255
2012-10-31 09:29:39	4.91	7.37		2.71023	-5.0051	-7.51274	2012-10-31 09:29:39
2012-10-31 09:39:39	4.92	7.38		2.71718	-5.01529	-7.52294
2012-10-31 09:49:39	4.96	7.42		2.72412	-5.05607	-7.56371
2012-10-31 09:59:39	4.94	7.38		2.73106	-5.03568	-7.52294
2012-10-31 10:09:39	4.99	7.44		2.73801	-5.08665	-7.5841
2012-10-31 10:19:39	4.99	7.43		2.74495	-5.08665	-7.5739
2012-10-31 10:29:39	5	7.45		2.7519	-5.09684	-7.59429	2012-10-31 10:29:39
2012-10-31 10:39:39	5.02	7.46		2.75884	-5.11723	-7.60449
2012-10-31 10:49:39	5.04	7.49		2.76579	-5.13761	-7.63507
2012-10-31 10:59:39	5.06	7.51		2.77273	-5.158	-7.65545
2012-10-31 11:09:39	5.07	7.52		2.77968	-5.1682	-7.66565
2012-10-31 11:19:39	5.06	7.53		2.78662	-5.158	-7.67584
2012-10-31 11:29:39	5.09	7.53		2.79356	-5.18858	-7.67584	2012-10-31 11:29:39
2012-10-31 11:39:39	5.12	7.57		2.80051	-5.21916	-7.71662
2012-10-31 11:49:39	4.59	6.97		2.80745	-4.6789	-7.10499
2012-10-31 11:59:39	4.4	6.85		2.8144	-4.48522	-6.98267
2012-10-31 12:09:39	4.45	6.91		2.82134	-4.53619	-7.04383
2012-10-31 12:19:39	4.5	6.93		2.82829	-4.58716	-7.06422
2012-10-31 12:29:39	4.54	6.97		2.83523	-4.62793	-7.10499	2012-10-31 12:29:39
2012-10-31 12:39:39	4.58	7.01		2.84218	-4.66871	-7.14577
2012-10-31 12:49:39	4.61	7.04		2.84912	-4.69929	-7.17635
2012-10-31 12:59:39	4.66	7.08		2.85606	-4.75025	-7.21713
2012-10-31 13:09:39	4.69	7.12		2.86301	-4.78084	-7.2579
2012-10-31 13:19:39	4.74	7.17		2.86995	-4.8318	-7.30887
2012-10-31 13:29:39	4.78	7.19		2.8769	-4.87258	-7.32926	2012-10-31 13:29:39
2012-10-31 13:39:39	4.81	7.23		2.88384	-4.90316	-7.37003
2012-10-31 13:49:39	4.85	7.26		2.89079	-4.94393	-7.40061
2012-10-31 13:59:39	4.89	7.31		2.89773	-4.98471	-7.45158
2012-10-31 14:09:39	4.89	7.31		2.90468	-4.98471	-7.45158
2012-10-31 14:19:39	4.92	7.33		2.91162	-5.01529	-7.47197
2012-10-31 14:29:39	4.96	7.37		2.91856	-5.05607	-7.51274	2012-10-31 14:29:39
2012-10-31 14:39:39	5.01	7.39		2.92551	-5.10703	-7.53313
2012-10-31 14:49:39	5.03	7.43		2.93245	-5.12742	-7.5739
2012-10-31 14:59:39	5.07	7.48		2.9394	-5.1682	-7.62487
2012-10-31 15:09:39	5.1	7.49		2.94634	-5.19878	-7.63507
2012-10-31 15:19:39	5.14	7.54		2.95329	-5.23955	-7.68603
2012-10-31 15:29:39	5.17	7.56		2.96023	-5.27013	-7.70642	2012-10-31 15:29:39
2012-10-31 15:39:39	5.18	7.58		2.96718	-5.28033	-7.72681
2012-10-31 15:49:39	5.2	7.6		2.97412	-5.30071	-7.7472
2012-10-31 15:59:39	5.22	7.62		2.98106	-5.3211	-7.76758
2012-10-31 16:09:39	5.24	7.64		2.98801	-5.34149	-7.78797
2012-10-31 16:19:39	5.27	7.66		2.99495	-5.37207	-7.80836
2012-10-31 16:29:39	5.29	7.69		3.0019	-5.39246	-7.83894	2012-10-31 16:29:39
2012-10-31 16:39:39	5.32	7.72		3.00884	-5.42304	-7.86952
2012-10-31 16:49:39	5.34	7.75		3.01579	-5.44343	-7.9001
2012-10-31 16:59:39	5.36	7.76		3.02273	-5.46381	-7.9103
2012-10-31 17:09:39	5.27	7.66		3.02968	-5.37207	-7.80836
2012-10-31 17:19:39	5.29	7.71		3.03662	-5.39246	-7.85933
2012-10-31 17:29:39	5.37	7.76		3.04356	-5.47401	-7.9103	2012-10-31 17:29:39
2012-10-31 17:39:39	5.42	7.81		3.05051	-5.52497	-7.96126
2012-10-31 17:49:39	5.44	7.83		3.05745	-5.54536	-7.98165
2012-10-31 17:59:39	5.44	7.82		3.0644	-5.54536	-7.97146
2012-10-31 18:09:39	5.49	7.89		3.07134	-5.59633	-8.04281
2012-10-31 18:19:39	5.53	7.92		3.07829	-5.6371	-8.07339
2012-10-31 18:29:39	5.55	7.94		3.08523	-5.65749	-8.09378	2012-10-31 18:29:39
2012-10-31 18:39:39	5.57	7.96		3.09218	-5.67788	-8.11417
2012-10-31 18:49:39	5.58	7.97		3.09912	-5.68807	-8.12436
2012-10-31 18:59:39	5.6	8.01		3.10606	-5.70846	-8.16514
2012-10-31 19:09:39	5.62	8.02		3.11301	-5.72885	-8.17533
2012-10-31 19:19:39	5.65	8.05		3.11995	-5.75943	-8.20591
2012-10-31 19:29:39	5.68	8.09		3.1269	-5.79001	-8.24669	2012-10-31 19:29:39
2012-10-31 19:39:39	5.7	8.1		3.13384	-5.8104	-8.25688
2012-10-31 19:49:39	5.71	8.11		3.14079	-5.82059	-8.26707
2012-10-31 19:59:39	5.74	8.14		3.14773	-5.85117	-8.29766
2012-10-31 20:09:39	5.76	8.17		3.15468	-5.87156	-8.32824
2012-10-31 20:19:39	5.78	8.19		3.16162	-5.89195	-8.34862
2012-10-31 20:29:39	5.8	8.22		3.16856	-5.91233	-8.3792	2012-10-31 20:29:39
2012-10-31 20:39:39	5.84	8.26		3.17551	-5.95311	-8.41998
2012-10-31 20:49:39	5.85	8.26		3.18245	-5.9633	-8.41998
2012-10-31 20:59:39	5.88	8.29		3.1894	-5.99388	-8.45056
2012-10-31 21:09:39	5.91	8.31		3.19634	-6.02446	-8.47095
2012-10-31 21:19:39	5.91	8.34		3.20329	-6.02446	-8.50153
2012-10-31 21:29:39	5.94	8.36		3.21023	-6.05505	-8.52192	2012-10-31 21:29:39
2012-10-31 21:39:39	5.97	8.39		3.21718	-6.08563	-8.5525
2012-10-31 21:49:39	6	8.42		3.22412	-6.11621	-8.58308
2012-10-31 21:59:39	6.03	8.45		3.23106	-6.14679	-8.61366
2012-10-31 22:09:39	6.03	8.46		3.23801	-6.14679	-8.62385
2012-10-31 22:19:39	6.06	8.48		3.24495	-6.17737	-8.64424
2012-10-31 22:29:39	6.06	8.49		3.2519	-6.17737	-8.65443	2012-10-31 22:29:39
2012-10-31 22:39:39	6.08	8.51		3.25884	-6.19776	-8.67482
2012-10-31 22:49:39	6.11	8.53		3.26579	-6.22834	-8.69521
2012-10-31 22:59:39	6.13	8.56		3.27273	-6.24873	-8.72579
2012-10-31 23:09:39	6.15	8.58		3.27968	-6.26911	-8.74618
2012-10-31 23:19:39	6.15	8.59		3.28662	-6.26911	-8.75637
2012-10-31 23:29:39	6.17	8.6		3.29356	-6.2895	-8.76656	2012-10-31 23:29:39
2012-10-31 23:39:39	6.2	8.63		3.30051	-6.32008	-8.79715
2012-10-31 23:49:39	6.22	8.66		3.30745	-6.34047	-8.82773
2012-10-31 23:59:39	6.24	8.67		3.3144	-6.36086	-8.83792
2012-11-01 00:09:39	6.26	8.7		3.32134	-6.38124	-8.8685
2012-11-01 00:19:39	6.26	8.7		3.32829	-6.38124	-8.8685
2012-11-01 00:29:39	6.29	8.73		3.33523	-6.41182	-8.89908	2012-11-01 00:29:39
2012-11-01 00:39:39	6.31	8.75		3.34218	-6.43221	-8.91947
2012-11-01 00:49:39	6.33	8.77		3.34912	-6.4526	-8.93986
2012-11-01 00:59:39	6.35	8.79		3.35606	-6.47299	-8.96024
2012-11-01 01:09:39	6.37	8.81		3.36301	-6.49337	-8.98063
2012-11-01 01:19:39	6.39	8.83		3.36995	-6.51376	-9.00102
2012-11-01 01:29:39	6.42	8.85		3.3769	-6.54434	-9.02141	2012-11-01 01:29:39
2012-11-01 01:39:39	6.44	8.88		3.38384	-6.56473	-9.05199
2012-11-01 01:49:39	6.47	8.91		3.39079	-6.59531	-9.08257
2012-11-01 01:59:39	6.49	8.92		3.39773	-6.6157	-9.09276
2012-11-01 02:09:39	6.51	8.96		3.40468	-6.63609	-9.13354
2012-11-01 02:19:39	6.54	8.98		3.41162	-6.66667	-9.15392
2012-11-01 02:29:39	6.56	9.01		3.41856	-6.68705	-9.18451	2012-11-01 02:29:39
2012-11-01 02:39:39	6.59	9.03		3.42551	-6.71764	-9.20489
2012-11-01 02:49:39	6.6	9.04		3.43245	-6.72783	-9.21509
2012-11-01 02:59:39	6.63	9.07		3.4394	-6.75841	-9.24567
2012-11-01 03:09:39	6.65	9.09		3.44634	-6.7788	-9.26606
2012-11-01 03:19:39	6.66	9.1		3.45329	-6.78899	-9.27625
2012-11-01 03:29:39	6.69	9.13		3.46023	-6.81957	-9.30683	2012-11-01 03:29:39
2012-11-01 03:39:39	6.71	9.15		3.46718	-6.83996	-9.32722
2012-11-01 03:49:39	6.74	9.19		3.47412	-6.87054	-9.36799
2012-11-01 03:59:39	6.75	9.2		3.48106	-6.88073	-9.37819
2012-11-01 04:09:39	6.78	9.22		3.48801	-6.91131	-9.39857
2012-11-01 04:19:39	6.8	9.24		3.49495	-6.9317	-9.41896
2012-11-01 04:29:39	6.81	9.26		3.5019	-6.9419	-9.43935	2012-11-01 04:29:39
2012-11-01 04:39:39	6.83	9.28		3.50884	-6.96228	-9.45973
2012-11-01 04:49:39	6.86	9.29		3.51579	-6.99286	-9.46993
2012-11-01 04:59:39	6.89	9.33		3.52273	-7.02345	-9.5107
2012-11-01 05:09:39	6.91	9.36		3.52968	-7.04383	-9.54128
2012-11-01 05:19:39	6.93	9.39		3.53662	-7.06422	-9.57187
2012-11-01 05:29:39	6.94	9.38		3.54356	-7.07441	-9.56167	2012-11-01 05:29:39
2012-11-01 05:39:39	6.96	9.42		3.55051	-7.0948	-9.60245
2012-11-01 05:49:39	6.99	9.44		3.55745	-7.12538	-9.62283
2012-11-01 05:59:39	7.02	9.47		3.5644	-7.15596	-9.65341
2012-11-01 06:09:39	7.04	9.49		3.57134	-7.17635	-9.6738
2012-11-01 06:19:39	7.07	9.53		3.57829	-7.20693	-9.71458
2012-11-01 06:29:39	7.08	9.53		3.58523	-7.21713	-9.71458	2012-11-01 06:29:39
2012-11-01 06:39:39	7.11	9.55		3.59218	-7.24771	-9.73496
2012-11-01 06:49:39	7.13	9.58		3.59912	-7.26809	-9.76555
2012-11-01 06:59:39	7.15	9.61		3.60606	-7.28848	-9.79613
2012-11-01 07:09:39	7.18	9.63		3.61301	-7.31906	-9.81651
2012-11-01 07:19:39	7.21	9.67		3.61995	-7.34964	-9.85729
2012-11-01 07:29:39	7.22	9.68		3.6269	-7.35984	-9.86748	2012-11-01 07:29:39
2012-11-01 07:39:39	7.24	9.71		3.63384	-7.38022	-9.89806
2012-11-01 07:49:39	7.29	9.73		3.64079	-7.43119	-9.91845
2012-11-01 07:59:39	7.32	9.74		3.64773	-7.46177	-9.92864
2012-11-01 08:09:39	7.26	9.72		3.65468	-7.40061	-9.90826
2012-11-01 08:19:39	7.31	9.78		3.66162	-7.45158	-9.96942
2012-11-01 08:29:39	7.33	9.79		3.66856	-7.47197	-9.97961	2012-11-01 08:29:39
2012-11-01 08:39:39	7.37	9.82		3.67551	-7.51274	-10.0102
2012-11-01 08:49:39	7.4	9.86		3.68245	-7.54332	-10.051
2012-11-01 08:59:39	7.41	9.87		3.6894	-7.55352	-10.0612
2012-11-01 09:09:39	7.43	9.89		3.69634	-7.5739	-10.0815
2012-11-01 09:19:39	7.45	9.91		3.70329	-7.59429	-10.1019
2012-11-01 09:29:39	7.46	9.89		3.71023	-7.60449	-10.0815	2012-11-01 09:29:39
2012-11-01 09:39:39	7.44	9.87		3.71718	-7.5841	-10.0612
2012-11-01 09:49:39	7.39	9.88		3.72412	-7.53313	-10.0714
2012-11-01 09:59:39	7.47	9.93		3.73106	-7.61468	-10.1223
2012-11-01 10:09:39	7.51	9.98		3.73801	-7.65545	-10.1733
2012-11-01 10:19:39	7.57	10.02		3.74495	-7.71662	-10.2141
2012-11-01 10:29:39	7.6	10.05		3.7519	-7.7472	-10.2446	2012-11-01 10:29:39
2012-11-01 10:39:39	7.56	10.05		3.75884	-7.70642	-10.2446
2012-11-01 10:49:39	7.59	10.08		3.76579	-7.737	-10.2752
2012-11-01 10:59:39	7.63	10.11		3.77273	-7.77778	-10.3058
2012-11-01 11:09:39	7.66	10.13		3.77968	-7.80836	-10.3262
2012-11-01 11:19:39	7.68	10.15		3.78662	-7.82875	-10.3466
2012-11-01 11:29:39	7.72	10.18		3.79356	-7.86952	-10.3772	2012-11-01 11:29:39
2012-11-01 11:39:39	7.75	10.21		3.80051	-7.9001	-10.4077
2012-11-01 11:49:39	7.77	10.24		3.80745	-7.92049	-10.4383
2012-11-01 11:59:39	7.8	10.27		3.8144	-7.95107	-10.4689
2012-11-01 12:09:39	7.83	10.29		3.82134	-7.98165	-10.4893
2012-11-01 12:19:39	7.85	10.33		3.82829	-8.00204	-10.5301
2012-11-01 12:29:39	7.89	10.36		3.83523	-8.04281	-10.5607	2012-11-01 12:29:39
2012-11-01 12:39:39	7.92	10.39		3.84218	-8.07339	-10.5912
2012-11-01 12:49:39	7.96	10.43		3.84912	-8.11417	-10.632
2012-11-01 12:59:39	7.99	10.45		3.85606	-8.14475	-10.6524
2012-11-01 13:09:39	8.02	10.49		3.86301	-8.17533	-10.6932
2012-11-01 13:19:39	8.05	10.51		3.86995	-8.20591	-10.7136
2012-11-01 13:29:39	8.06	10.52		3.8769	-8.21611	-10.7238	2012-11-01 13:29:39
2012-11-01 13:39:39	8.11	10.57		3.88384	-8.26707	-10.7747
2012-11-01 13:49:39	8.13	10.59		3.89079	-8.28746	-10.7951
2012-11-01 13:59:39	8.16	10.62		3.89773	-8.31804	-10.8257
2012-11-01 14:09:39	8.19	10.63		3.90468	-8.34862	-10.8359
2012-11-01 14:19:39	8.22	10.68		3.91162	-8.3792	-10.8869
2012-11-01 14:29:39	8.25	10.71		3.91856	-8.40979	-10.9174	2012-11-01 14:29:39
2012-11-01 14:39:39	8.28	10.74		3.92551	-8.44037	-10.948
2012-11-01 14:49:39	8.31	10.78		3.93245	-8.47095	-10.9888
2012-11-01 14:59:39	8.34	10.81		3.9394	-8.50153	-11.0194
2012-11-01 15:09:39	8.36	10.83		3.94634	-8.52192	-11.0398
2012-11-01 15:19:39	8.4	10.87		3.95329	-8.56269	-11.0805
2012-11-01 15:29:39	8.42	10.88		3.96023	-8.58308	-11.0907	2012-11-01 15:29:39
2012-11-01 15:39:39	8.45	10.92		3.96718	-8.61366	-11.1315
2012-11-01 15:49:39	8.49	10.94		3.97412	-8.65443	-11.1519
2012-11-01 15:59:39	8.52	10.99		3.98106	-8.68502	-11.2029
2012-11-01 16:09:39	8.55	11.02		3.98801	-8.7156	-11.2334
2012-11-01 16:19:39	8.57	11.05		3.99495	-8.73598	-11.264
2012-11-01 16:29:39	8.6	11.07		4.0019	-8.76656	-11.2844	2012-11-01 16:29:39
2012-11-01 16:39:39	8.62	11.1		4.00884	-8.78695	-11.315
2012-11-01 16:49:39	8.66	11.13		4.01579	-8.82773	-11.3456
2012-11-01 16:59:39	8.69	11.16		4.02273	-8.85831	-11.3761
2012-11-01 17:09:39	8.65	11.12		4.02968	-8.81753	-11.3354
2012-11-01 17:19:39	8.72	11.2		4.03662	-8.88889	-11.4169
2012-11-01 17:29:39	8.75	11.23		4.04356	-8.91947	-11.4475	2012-11-01 17:29:39
2012-11-01 17:39:39	8.74	11.23		4.05051	-8.90928	-11.4475
2012-11-01 17:49:39	8.74	11.21		4.05745	-8.90928	-11.4271
2012-11-01 17:59:39	8.78	11.26		4.0644	-8.95005	-11.4781
2012-11-01 18:09:39	8.85	11.32		4.07134	-9.02141	-11.5392
2012-11-01 18:19:39	8.89	11.35		4.07829	-9.06218	-11.5698
2012-11-01 18:29:39	8.93	11.39		4.08523	-9.10296	-11.6106	2012-11-01 18:29:39
2012-11-01 18:39:39	8.98	11.44		4.09218	-9.15392	-11.6616
2012-11-01 18:49:39	9.01	11.48		4.09912	-9.18451	-11.7023
2012-11-01 18:59:39	9.07	11.53		4.10606	-9.24567	-11.7533
2012-11-01 19:09:39	9.11	11.58		4.11301	-9.28644	-11.8043
2012-11-01 19:19:39	9.14	11.62		4.11995	-9.31702	-11.8451
2012-11-01 19:29:39	9.18	11.65		4.1269	-9.3578	-11.8756	2012-11-01 19:29:39
2012-11-01 19:39:39	9.21	11.68		4.13384	-9.38838	-11.9062
2012-11-01 19:49:39	9.24	11.72		4.14079	-9.41896	-11.947
2012-11-01 19:59:39	9.3	11.77		4.14773	-9.48012	-11.998
2012-11-01 20:09:39	9.35	11.82		4.15468	-9.53109	-12.0489
2012-11-01 20:19:39	9.38	11.86		4.16162	-9.56167	-12.0897
2012-11-01 20:29:39	9.43	11.91		4.16856	-9.61264	-12.1407	2012-11-01 20:29:39
2012-11-01 20:39:39	9.47	11.95		4.17551	-9.65341	-12.1814
2012-11-01 20:49:39	9.52	12		4.18245	-9.70438	-12.2324
2012-11-01 20:59:39	9.57	12.05		4.1894	-9.75535	-12.2834
2012-11-01 21:09:39	9.61	12.09		4.19634	-9.79613	-12.3242
2012-11-01 21:19:39	9.66	12.14		4.20329	-9.84709	-12.3751
2012-11-01 21:29:39	9.7	12.18		4.21023	-9.88787	-12.4159	2012-11-01 21:29:39
2012-11-01 21:39:39	9.73	12.22		4.21718	-9.91845	-12.4567
2012-11-01 21:49:39	9.78	12.26		4.22412	-9.96942	-12.4975
2012-11-01 21:59:39	9.82	12.3		4.23106	-10.0102	-12.5382
2012-11-01 22:09:39	9.85	12.34		4.23801	-10.0408	-12.579
2012-11-01 22:19:39	9.9	12.38		4.24495	-10.0917	-12.6198
2012-11-01 22:29:39	9.96	12.45		4.2519	-10.1529	-12.6911	2012-11-01 22:29:39
2012-11-01 22:39:39	9.99	12.49		4.25884	-10.1835	-12.7319
2012-11-01 22:49:39	10.04	12.53		4.26579	-10.2345	-12.7727
2012-11-01 22:59:39	10.08	12.58		4.27273	-10.2752	-12.8236
2012-11-01 23:09:39	10.14	12.63		4.27968	-10.3364	-12.8746
2012-11-01 23:19:39	10.17	12.66		4.28662	-10.367	-12.9052
2012-11-01 23:29:39	10.22	12.71		4.29356	-10.4179	-12.9562	2012-11-01 23:29:39
2012-11-01 23:39:39	10.27	12.76		4.30051	-10.4689	-13.0071
2012-11-01 23:49:39	10.31	12.81		4.30745	-10.5097	-13.0581
2012-11-01 23:59:39	10.37	12.86		4.3144	-10.5708	-13.1091
2012-11-02 00:09:39	10.38	12.88		4.32134	-10.581	-13.1295
2012-11-02 00:19:39	10.45	12.94		4.32829	-10.6524	-13.1906
2012-11-02 00:29:39	10.49	12.99		4.33523	-10.6932	-13.2416	2012-11-02 00:29:39
2012-11-02 00:39:39	10.54	13.03		4.34218	-10.7441	-13.2824
2012-11-02 00:49:39	10.58	13.08		4.34912	-10.7849	-13.3333
2012-11-02 00:59:39	10.63	13.14		4.35606	-10.8359	-13.3945
2012-11-02 01:09:39	10.67	13.18		4.36301	-10.8767	-13.4353
2012-11-02 01:19:39	10.71	13.22		4.36995	-10.9174	-13.476
2012-11-02 01:29:39	10.77	13.27		4.3769	-10.9786	-13.527	2012-11-02 01:29:39
2012-11-02 01:39:39	10.8	13.31		4.38384	-11.0092	-13.5678
2012-11-02 01:49:39	10.85	13.36		4.39079	-11.0601	-13.6188
2012-11-02 01:59:39	10.9	13.39		4.39773	-11.1111	-13.6493
2012-11-02 02:09:39	10.95	13.44		4.40468	-11.1621	-13.7003
2012-11-02 02:19:39	10.99	13.49		4.41162	-11.2029	-13.7513
2012-11-02 02:29:39	11.04	13.55		4.41856	-11.2538	-13.8124	2012-11-02 02:29:39
2012-11-02 02:39:39	11.08	13.59		4.42551	-11.2946	-13.8532
2012-11-02 02:49:39	11.12	13.62		4.43245	-11.3354	-13.8838
2012-11-02 02:59:39	11.17	13.68		4.4394	-11.3863	-13.945
2012-11-02 03:09:39	11.23	13.74		4.44634	-11.4475	-14.0061
2012-11-02 03:19:39	11.27	13.77		4.45329	-11.4883	-14.0367
2012-11-02 03:29:39	11.31	13.82		4.46023	-11.5291	-14.0877	2012-11-02 03:29:39
2012-11-02 03:39:39	11.35	13.86		4.46718	-11.5698	-14.1284
2012-11-02 03:49:39	11.39	13.9		4.47412	-11.6106	-14.1692
2012-11-02 03:59:39	11.43	13.94		4.48106	-11.6514	-14.21
2012-11-02 04:09:39	11.49	14		4.48801	-11.7125	-14.2712
2012-11-02 04:19:39	11.54	14.05		4.49495	-11.7635	-14.3221
2012-11-02 04:29:39	11.58	14.09		4.5019	-11.8043	-14.3629	2012-11-02 04:29:39
2012-11-02 04:39:39	11.63	14.14		4.50884	-11.8552	-14.4139
2012-11-02 04:49:39	11.68	14.18		4.51579	-11.9062	-14.4546
2012-11-02 04:59:39	11.72	14.24		4.52273	-11.947	-14.5158
2012-11-02 05:09:39	11.78	14.28		4.52968	-12.0082	-14.5566
2012-11-02 05:19:39	11.81	14.32		4.53662	-12.0387	-14.5973
2012-11-02 05:29:39	11.86	14.36		4.54356	-12.0897	-14.6381	2012-11-02 05:29:39
2012-11-02 05:39:39	11.9	14.41		4.55051	-12.1305	-14.6891
2012-11-02 05:49:39	11.95	14.47		4.55745	-12.1814	-14.7503
2012-11-02 05:59:39	11.99	14.51		4.5644	-12.2222	-14.791
2012-11-02 06:09:39	12.04	14.56		4.57134	-12.2732	-14.842
2012-11-02 06:19:39	12.09	14.62		4.57829	-12.3242	-14.9032
2012-11-02 06:29:39	12.15	14.66		4.58523	-12.3853	-14.9439	2012-11-02 06:29:39
2012-11-02 06:39:39	12.17	14.69		4.59218	-12.4057	-14.9745
2012-11-02 06:49:39	12.24	14.76		4.59912	-12.4771	-15.0459
2012-11-02 06:59:39	12.28	14.8		4.60606	-12.5178	-15.0866
2012-11-02 07:09:39	12.34	14.86		4.61301	-12.579	-15.1478
2012-11-02 07:19:39	12.37	14.89		4.61995	-12.6096	-15.1784
2012-11-02 07:29:39	12.42	14.94		4.6269	-12.6606	-15.2294	2012-11-02 07:29:39
2012-11-02 07:39:39	12.45	14.98		4.63384	-12.6911	-15.2701
2012-11-02 07:49:39	12.51	15.03		4.64079	-12.7523	-15.3211
2012-11-02 07:59:39	12.54	15.06		4.64773	-12.7829	-15.3517
2012-11-02 08:09:39	12.59	15.12		4.65468	-12.8338	-15.4128
2012-11-02 08:19:39	12.62	15.15		4.66162	-12.8644	-15.4434
2012-11-02 08:29:39	12.66	15.17		4.66856	-12.9052	-15.4638	2012-11-02 08:29:39
2012-11-02 08:39:39	12.7	15.22		4.67551	-12.946	-15.5148
2012-11-02 08:49:39	12.76	15.29		4.68245	-13.0071	-15.5861
2012-11-02 08:59:39	12.8	15.32		4.6894	-13.0479	-15.6167
2012-11-02 09:09:39	12.85	15.37		4.69634	-13.0989	-15.6677
2012-11-02 09:19:39	12.88	15.4		4.70329	-13.1295	-15.6983
2012-11-02 09:29:39	12.91	15.43		4.71023	-13.16	-15.7288	2012-11-02 09:29:39
2012-11-02 09:39:39	12.96	15.5		4.71718	-13.211	-15.8002
2012-11-02 09:49:39	13.01	15.54		4.72412	-13.262	-15.841
2012-11-02 09:59:39	13.05	15.57		4.73106	-13.3028	-15.8716
2012-11-02 10:09:39	13.1	15.62		4.73801	-13.3537	-15.9225
2012-11-02 10:19:39	13.15	15.68		4.74495	-13.4047	-15.9837
2012-11-02 10:29:39	13.21	15.73		4.7519	-13.4659	-16.0347	2012-11-02 10:29:39
2012-11-02 10:39:39	13.27	15.78		4.75884	-13.527	-16.0856
2012-11-02 10:49:39	13.32	15.84		4.76579	-13.578	-16.1468
2012-11-02 10:59:39	13.11	15.64		4.77273	-13.3639	-15.9429
2012-11-02 11:09:39	13.28	15.79		4.77968	-13.5372	-16.0958
2012-11-02 11:19:39	13.35	15.86		4.78662	-13.6086	-16.1672
2012-11-02 11:29:39	13.41	15.93		4.79356	-13.6697	-16.2385	2012-11-02 11:29:39
2012-11-02 11:39:39	13.42	15.95		4.80051	-13.6799	-16.2589
2012-11-02 11:49:39	13.49	15.99		4.80745	-13.7513	-16.2997
2012-11-02 11:59:39	13.57	16.07		4.8144	-13.8328	-16.3812
2012-11-02 12:09:39	13.57	16.08		4.82134	-13.8328	-16.3914
2012-11-02 12:19:39	13.61	16.13		4.82829	-13.8736	-16.4424
2012-11-02 12:29:39	13.63	16.14		4.83523	-13.894	-16.4526	2012-11-02 12:29:39
2012-11-02 12:39:39	13.71	16.22		4.84218	-13.9755	-16.5341
2012-11-02 12:49:39	13.74	16.26		4.84912	-14.0061	-16.5749
2012-11-02 12:59:39	13.78	16.3		4.85606	-14.0469	-16.6157
2012-11-02 13:09:39	13.85	16.36		4.86301	-14.1182	-16.6769
2012-11-02 13:19:39	13.88	16.4		4.86995	-14.1488	-16.7176
2012-11-02 13:29:39	13.93	16.44		4.8769	-14.1998	-16.7584	2012-11-02 13:29:39
2012-11-02 13:39:39	13.96	16.47		4.88384	-14.2304	-16.789
2012-11-02 13:49:39	14.01	16.53		4.89079	-14.2813	-16.8502
2012-11-02 13:59:39	14.05	16.57		4.89773	-14.3221	-16.8909
2012-11-02 14:09:39	14.11	16.63		4.90468	-14.3833	-16.9521
2012-11-02 14:19:39	14.15	16.67		4.91162	-14.4241	-16.9929
2012-11-02 14:29:39	14.18	16.71		4.91856	-14.4546	-17.0336	2012-11-02 14:29:39
2012-11-02 14:39:39	14.24	16.78		4.92551	-14.5158	-17.105
2012-11-02 14:49:39	14.31	16.85		4.93245	-14.5872	-17.1764
2012-11-02 14:59:39	14.16	16.67		4.9394	-14.4343	-16.9929
2012-11-02 15:09:39	14.28	16.82		4.94634	-14.5566	-17.1458
2012-11-02 15:19:39	14.35	16.89		4.95329	-14.6279	-17.2171
2012-11-02 15:29:39	14.42	16.95		4.96023	-14.6993	-17.2783	2012-11-02 15:29:39
2012-11-02 15:39:39	14.48	17.01		4.96718	-14.7604	-17.3394
2012-11-02 15:49:39	14.53	17.06		4.97412	-14.8114	-17.3904
2012-11-02 15:59:39	14.59	17.11		4.98106	-14.8726	-17.4414
2012-11-02 16:09:39	14.65	17.17		4.98801	-14.9337	-17.5025
2012-11-02 16:19:39	14.71	17.24		4.99495	-14.9949	-17.5739
2012-11-02 16:29:39	14.77	17.29		5.0019	-15.0561	-17.6249	2012-11-02 16:29:39
2012-11-02 16:39:39	14.83	17.36		5.00884	-15.1172	-17.6962
2012-11-02 16:49:39	14.88	17.41		5.01579	-15.1682	-17.7472
2012-11-02 16:59:39	14.95	17.47		5.02273	-15.2396	-17.8084
2012-11-02 17:09:39	14.99	17.52		5.02968	-15.2803	-17.8593
2012-11-02 17:19:39	15.05	17.58		5.03662	-15.3415	-17.9205
2012-11-02 17:29:39	15.1	17.64		5.04356	-15.3925	-17.9817	2012-11-02 17:29:39
2012-11-02 17:39:39	15.15	17.69		5.05051	-15.4434	-18.0326
2012-11-02 17:49:39	15.21	17.74		5.05745	-15.5046	-18.0836
2012-11-02 17:59:39	15.26	17.8		5.0644	-15.5556	-18.1448
2012-11-02 18:09:39	15.32	17.86		5.07134	-15.6167	-18.2059
2012-11-02 18:19:39	15.38	17.92		5.07829	-15.6779	-18.2671
2012-11-02 18:29:39	15.45	17.99		5.08523	-15.7492	-18.3384	2012-11-02 18:29:39
2012-11-02 18:39:39	15.51	18.05		5.09218	-15.8104	-18.3996
2012-11-02 18:49:39	15.57	18.11		5.09912	-15.8716	-18.4608
2012-11-02 18:59:39	15.64	18.18		5.10606	-15.9429	-18.5321
2012-11-02 19:09:39	15.71	18.24		5.11301	-16.0143	-18.5933
2012-11-02 19:19:39	15.78	18.31		5.11995	-16.0856	-18.6646
2012-11-02 19:29:39	15.84	18.38		5.1269	-16.1468	-18.736	2012-11-02 19:29:39
2012-11-02 19:39:39	15.89	18.44		5.13384	-16.1978	-18.7971
2012-11-02 19:49:39	15.96	18.5		5.14079	-16.2691	-18.8583
2012-11-02 19:59:39	16.02	18.56		5.14773	-16.3303	-18.9195
2012-11-02 20:09:39	16.09	18.63		5.15468	-16.4016	-18.9908
2012-11-02 20:19:39	15.92	18.47		5.16162	-16.2283	-18.8277
2012-11-02 20:29:39	16.1	18.65		5.16856	-16.4118	-19.0112	2012-11-02 20:29:39
2012-11-02 20:39:39	16.19	18.74		5.17551	-16.5036	-19.103
2012-11-02 20:49:39	16.27	18.81		5.18245	-16.5851	-19.1743
2012-11-02 20:59:39	16.33	18.89		5.1894	-16.6463	-19.2559
2012-11-02 21:09:39	16.4	18.95		5.19634	-16.7176	-19.317
2012-11-02 21:19:39	16.48	19.03		5.20329	-16.7992	-19.3986
2012-11-02 21:29:39	16.54	19.09		5.21023	-16.8603	-19.4597	2012-11-02 21:29:39
2012-11-02 21:39:39	16.6	19.15		5.21718	-16.9215	-19.5209
2012-11-02 21:49:39	16.68	19.23		5.22412	-17.0031	-19.6024
2012-11-02 21:59:39	16.74	19.29		5.23106	-17.0642	-19.6636
2012-11-02 22:09:39	16.81	19.36		5.23801	-17.1356	-19.735
2012-11-02 22:19:39	16.88	19.43		5.24495	-17.2069	-19.8063
2012-11-02 22:29:39	16.95	19.5		5.2519	-17.2783	-19.8777	2012-11-02 22:29:39
2012-11-02 22:39:39	17.01	19.57		5.25884	-17.3394	-19.949
2012-11-02 22:49:39	17.08	19.63		5.26579	-17.4108	-20.0102
2012-11-02 22:59:39	17.14	19.69		5.27273	-17.472	-20.0714
2012-11-02 23:09:39	17.2	19.76		5.27968	-17.5331	-20.1427
2012-11-02 23:19:39	17.26	19.82		5.28662	-17.5943	-20.2039
2012-11-02 23:29:39	17.34	19.89		5.29356	-17.6758	-20.2752	2012-11-02 23:29:39
2012-11-02 23:39:39	17.4	19.96		5.30051	-17.737	-20.3466
2012-11-02 23:49:39	17.45	20.01		5.30745	-17.788	-20.3976
2012-11-02 23:59:39	17.51	20.08		5.3144	-17.8491	-20.4689
2012-11-03 00:09:39	17.59	20.14		5.32134	-17.9307	-20.5301
2012-11-03 00:19:39	17.64	20.2		5.32829	-17.9817	-20.5912
2012-11-03 00:29:39	17.72	20.28		5.33523	-18.0632	-20.6728	2012-11-03 00:29:39
2012-11-03 00:39:39	17.8	20.36		5.34218	-18.1448	-20.7543
2012-11-03 00:49:39	17.86	20.41		5.34912	-18.2059	-20.8053
2012-11-03 00:59:39	17.93	20.49		5.35606	-18.2773	-20.8869
2012-11-03 01:09:39	18	20.56		5.36301	-18.3486	-20.9582
2012-11-03 01:19:39	18.06	20.62		5.36995	-18.4098	-21.0194
2012-11-03 01:29:39	18.13	20.69		5.3769	-18.4811	-21.0907	2012-11-03 01:29:39
2012-11-03 01:39:39	18.2	20.77		5.38384	-18.5525	-21.1723
2012-11-03 01:49:39	18.28	20.84		5.39079	-18.634	-21.2436
2012-11-03 01:59:39	18.35	20.91		5.39773	-18.7054	-21.315
2012-11-03 02:09:39	18.4	20.96		5.40468	-18.7564	-21.366
2012-11-03 02:19:39	18.49	21.06		5.41162	-18.8481	-21.4679
2012-11-03 02:29:39	18.55	21.12		5.41856	-18.9093	-21.5291	2012-11-03 02:29:39
2012-11-03 02:39:39	18.64	21.21		5.42551	-19.001	-21.6208
2012-11-03 02:49:39	18.7	21.26		5.43245	-19.0622	-21.6718
2012-11-03 02:59:39	18.77	21.34		5.4394	-19.1335	-21.7533
2012-11-03 03:09:39	18.85	21.41		5.44634	-19.2151	-21.8247
2012-11-03 03:19:39	18.91	21.48		5.45329	-19.2762	-21.896
2012-11-03 03:29:39	19	21.55		5.46023	-19.368	-21.9674	2012-11-03 03:29:39
2012-11-03 03:39:39	19.05	21.61		5.46718	-19.419	-22.0285
2012-11-03 03:49:39	19.12	21.68		5.47412	-19.4903	-22.0999
2012-11-03 03:59:39	19.2	21.76		5.48106	-19.5719	-22.1814
2012-11-03 04:09:39	19.28	21.83		5.48801	-19.6534	-22.2528
2012-11-03 04:19:39	19.35	21.9		5.49495	-19.7248	-22.3242
2012-11-03 04:29:39	19.41	21.99		5.5019	-19.7859	-22.4159	2012-11-03 04:29:39
2012-11-03 04:39:39	19.49	22.05		5.50884	-19.8675	-22.4771
2012-11-03 04:49:39	19.55	22.11		5.51579	-19.9286	-22.5382
2012-11-03 04:59:39	19.63	22.19		5.52273	-20.0102	-22.6198
2012-11-03 05:09:39	19.69	22.25		5.52968	-20.0714	-22.6809
2012-11-03 05:19:39	19.77	22.33		5.53662	-20.1529	-22.7625
2012-11-03 05:29:39	19.83	22.4		5.54356	-20.2141	-22.8338	2012-11-03 05:29:39
2012-11-03 05:39:39	19.91	22.48		5.55051	-20.2956	-22.9154
2012-11-03 05:49:39	19.97	22.55		5.55745	-20.3568	-22.9867
2012-11-03 05:59:39	20.06	22.63		5.5644	-20.4485	-23.0683
2012-11-03 06:09:39	20.13	22.69		5.57134	-20.5199	-23.1295
2012-11-03 06:19:39	20.2	22.76		5.57829	-20.5912	-23.2008
2012-11-03 06:29:39	20.27	22.84		5.58523	-20.6626	-23.2824	2012-11-03 06:29:39
2012-11-03 06:39:39	20.33	22.89		5.59218	-20.7238	-23.3333
2012-11-03 06:49:39	20.4	22.97		5.59912	-20.7951	-23.4149
2012-11-03 06:59:39	20.47	23.04		5.60606	-20.8665	-23.4862
2012-11-03 07:09:39	20.55	23.12		5.61301	-20.948	-23.5678
2012-11-03 07:19:39	20.62	23.2		5.61995	-21.0194	-23.6493
2012-11-03 07:29:39	20.7	23.27		5.6269	-21.1009	-23.7207	2012-11-03 07:29:39
2012-11-03 07:39:39	20.77	23.33		5.63384	-21.1723	-23.7819
2012-11-03 07:49:39	20.84	23.42		5.64079	-21.2436	-23.8736
2012-11-03 07:59:39	20.91	23.48		5.64773	-21.315	-23.9348
2012-11-03 08:09:39	20.98	23.55		5.65468	-21.3863	-24.0061
2012-11-03 08:19:39	21.06	23.63		5.66162	-21.4679	-24.0877
2012-11-03 08:29:39	21.13	23.71		5.66856	-21.5392	-24.1692	2012-11-03 08:29:39
2012-11-03 08:39:39	21.21	23.78		5.67551	-21.6208	-24.2406
2012-11-03 08:49:39	21.3	23.88		5.68245	-21.7125	-24.3425
2012-11-03 08:59:39	21.38	23.95		5.6894	-21.7941	-24.4139
2012-11-03 09:09:39	21.44	24.02		5.69634	-21.8552	-24.4852
2012-11-03 09:19:39	21.53	24.11		5.70329	-21.947	-24.577
2012-11-03 09:29:39	21.62	24.19		5.71023	-22.0387	-24.6585	2012-11-03 09:29:39
2012-11-03 09:39:39	21.69	24.26		5.71718	-22.1101	-24.7299
2012-11-03 09:49:39	21.76	24.34		5.72412	-22.1814	-24.8114
2012-11-03 09:59:39	21.86	24.43		5.73106	-22.2834	-24.9032
2012-11-03 10:09:39	21.94	24.52		5.73801	-22.3649	-24.9949
2012-11-03 10:19:39	22	24.59		5.74495	-22.4261	-25.0663
2012-11-03 10:29:39	21.96	24.51		5.7519	-22.3853	-24.9847	2012-11-03 10:29:39
2012-11-03 10:39:39	22.13	24.68		5.75884	-22.5586	-25.158
2012-11-03 10:49:39	22.2	24.75		5.76579	-22.63	-25.2294
2012-11-03 10:59:39	22.27	24.82		5.77273	-22.7013	-25.3007
2012-11-03 11:09:39	22.36	24.91		5.77968	-22.7931	-25.3925
2012-11-03 11:19:39	22.45	24.99		5.78662	-22.8848	-25.474
2012-11-03 11:29:39	22.51	25.06		5.79356	-22.946	-25.5454	2012-11-03 11:29:39
2012-11-03 11:39:39	22.59	25.14		5.80051	-23.0275	-25.6269
2012-11-03 11:49:39	22.66	25.21		5.80745	-23.0989	-25.6983
2012-11-03 11:59:39	22.73	25.29		5.8144	-23.1702	-25.7798
2012-11-03 12:09:39	22.81	25.36		5.82134	-23.2518	-25.8512
2012-11-03 12:19:39	22.86	25.42		5.82829	-23.3028	-25.9123
2012-11-03 12:29:39	22.95	25.5		5.83523	-23.3945	-25.9939	2012-11-03 12:29:39
2012-11-03 12:39:39	23.02	25.57		5.84218	-23.4659	-26.0652
2012-11-03 12:49:39	23.1	25.65		5.84912	-23.5474	-26.1468
2012-11-03 12:59:39	23.18	25.72		5.85606	-23.629	-26.2181
2012-11-03 13:09:39	23.24	25.79		5.86301	-23.6901	-26.2895
2012-11-03 13:19:39	23.33	25.87		5.86995	-23.7819	-26.371
2012-11-03 13:29:39	23.4	25.95		5.8769	-23.8532	-26.4526	2012-11-03 13:29:39
2012-11-03 13:39:39	23.47	26.03		5.88384	-23.9246	-26.5341
2012-11-03 13:49:39	23.56	26.11		5.89079	-24.0163	-26.6157
2012-11-03 13:59:39	23.63	26.18		5.89773	-24.0877	-26.6871
2012-11-03 14:09:39	23.73	26.28		5.90468	-24.1896	-26.789
2012-11-03 14:19:39	23.8	26.36		5.91162	-24.261	-26.8705
2012-11-03 14:29:39	23.89	26.45		5.91856	-24.3527	-26.9623	2012-11-03 14:29:39
2012-11-03 14:39:39	23.96	26.51		5.92551	-24.4241	-27.0234
2012-11-03 14:49:39	24.04	26.59		5.93245	-24.5056	-27.105
2012-11-03 14:59:39	24.1	26.66		5.9394	-24.5668	-27.1764
2012-11-03 15:09:39	24.18	26.75		5.94634	-24.6483	-27.2681
2012-11-03 15:19:39	24.29	26.85		5.95329	-24.7604	-27.37
2012-11-03 15:29:39	24.2	26.76		5.96023	-24.6687	-27.2783	2012-11-03 15:29:39
2012-11-03 15:39:39	24.22	26.8		5.96718	-24.6891	-27.3191
2012-11-03 15:49:39	24.38	26.97		5.97412	-24.8522	-27.4924
2012-11-03 15:59:39	24.5	27.07		5.98106	-24.9745	-27.5943
2012-11-03 16:09:39	24.58	27.15		5.98801	-25.0561	-27.6758
2012-11-03 16:19:39	24.66	27.23		5.99495	-25.1376	-27.7574
2012-11-03 16:29:39	24.77	27.33		6.0019	-25.2497	-27.8593	2012-11-03 16:29:39
2012-11-03 16:39:39	24.83	27.4		6.00884	-25.3109	-27.9307
2012-11-03 16:49:39	24.91	27.48		6.01579	-25.3925	-28.0122
2012-11-03 16:59:39	24.99	27.56		6.02273	-25.474	-28.0938
2012-11-03 17:09:39	25.08	27.64		6.02968	-25.5657	-28.1753
2012-11-03 17:19:39	25.17	27.74		6.03662	-25.6575	-28.2773
2012-11-03 17:29:39	25.24	27.83		6.04356	-25.7288	-28.369	2012-11-03 17:29:39
2012-11-03 17:39:39	25.33	27.9		6.05051	-25.8206	-28.4404
2012-11-03 17:49:39	25.41	27.98		6.05745	-25.9021	-28.5219
2012-11-03 17:59:39	25.5	28.07		6.0644	-25.9939	-28.6137
2012-11-03 18:09:39	25.6	28.17		6.07134	-26.0958	-28.7156
2012-11-03 18:19:39	25.67	28.25		6.07829	-26.1672	-28.7971
2012-11-03 18:29:39	25.68	28.24		6.08523	-26.1774	-28.787	2012-11-03 18:29:39
2012-11-03 18:39:39	25.83	28.38		6.09218	-26.3303	-28.9297
2012-11-03 18:49:39	25.92	28.48		6.09912	-26.422	-29.0316
2012-11-03 18:59:39	26	28.55		6.10606	-26.5036	-29.103
2012-11-03 19:09:39	26.1	28.64		6.11301	-26.6055	-29.1947
2012-11-03 19:19:39	26.19	28.74		6.11995	-26.6972	-29.2966
2012-11-03 19:29:39	26.28	28.84		6.1269	-26.789	-29.3986	2012-11-03 19:29:39
2012-11-03 19:39:39	26.37	28.93		6.13384	-26.8807	-29.4903
2012-11-03 19:49:39	26.46	29.02		6.14079	-26.9725	-29.5821
2012-11-03 19:59:39	26.57	29.12		6.14773	-27.0846	-29.684
2012-11-03 20:09:39	26.68	29.23		6.15468	-27.1967	-29.7961
2012-11-03 20:19:39	26.78	29.33		6.16162	-27.2987	-29.8981
2012-11-03 20:29:39	26.89	29.45		6.16856	-27.4108	-30.0204	2012-11-03 20:29:39
2012-11-03 20:39:39	26.98	29.54		6.17551	-27.5025	-30.1121
2012-11-03 20:49:39	27.09	29.64		6.18245	-27.6147	-30.2141
2012-11-03 20:59:39	27.19	29.74		6.1894	-27.7166	-30.316
2012-11-03 21:09:39	27.3	29.85		6.19634	-27.8287	-30.4281
2012-11-03 21:19:39	27.42	29.97		6.20329	-27.9511	-30.5505
2012-11-03 21:29:39	27.53	30.09		6.21023	-28.0632	-30.6728	2012-11-03 21:29:39
2012-11-03 21:39:39	27.63	30.2		6.21718	-28.1651	-30.7849
2012-11-03 21:49:39	27.75	30.29		6.22412	-28.2875	-30.8767
2012-11-03 21:59:39	27.86	30.41		6.23106	-28.3996	-30.999
2012-11-03 22:09:39	27.96	30.52		6.23801	-28.5015	-31.1111
2012-11-03 22:19:39	28.08	30.64		6.24495	-28.6239	-31.2334
2012-11-03 22:29:39	28.19	30.77		6.2519	-28.736	-31.366	2012-11-03 22:29:39
2012-11-03 22:39:39	28.31	30.88		6.25884	-28.8583	-31.4781
2012-11-03 22:49:39	28.42	30.99		6.26579	-28.9704	-31.5902
2012-11-03 22:59:39	28.53	31.11		6.27273	-29.0826	-31.7125
2012-11-03 23:09:39	28.66	31.23		6.27968	-29.2151	-31.8349
2012-11-03 23:19:39	28.79	31.36		6.28662	-29.3476	-31.9674
2012-11-03 23:29:39	28.9	31.47		6.29356	-29.4597	-32.0795	2012-11-03 23:29:39
2012-11-03 23:39:39	29.03	31.59		6.30051	-29.5923	-32.2018
2012-11-03 23:49:39	29.16	31.72		6.30745	-29.7248	-32.3344
2012-11-03 23:59:39	29.26	31.83		6.3144	-29.8267	-32.4465
2012-11-04 00:09:39	29.37	31.94		6.32134	-29.9388	-32.5586
2012-11-04 00:19:39	29.51	32.09		6.32829	-30.0815	-32.7115
2012-11-04 00:29:39	29.63	32.2		6.33523	-30.2039	-32.8236	2012-11-04 00:29:39
2012-11-04 00:39:39	29.78	32.34		6.34218	-30.3568	-32.9664
2012-11-04 00:49:39	29.87	32.45		6.34912	-30.4485	-33.0785
2012-11-04 00:59:39	30.01	32.59		6.35606	-30.5912	-33.2212
2012-11-04 01:09:39	30.14	32.7		6.36301	-30.7238	-33.3333
2012-11-04 01:19:39	30.24	32.81		6.36995	-30.8257	-33.4455
2012-11-04 01:29:39	30.38	32.95		6.3769	-30.9684	-33.5882	2012-11-04 01:29:39
2012-11-04 01:39:39	30.51	33.07		6.38384	-31.1009	-33.7105
2012-11-04 01:49:39	30.64	33.21		6.39079	-31.2334	-33.8532
2012-11-04 01:59:39	30.75	33.34		6.39773	-31.3456	-33.9857
2012-11-04 02:09:39	30.89	33.46		6.40468	-31.4883	-34.1081
2012-11-04 02:19:39	31.01	33.58		6.41162	-31.6106	-34.2304
2012-11-04 02:29:39	31.13	33.72		6.41856	-31.7329	-34.3731	2012-11-04 02:29:39
2012-11-04 02:39:39	31.27	33.85		6.42551	-31.8756	-34.5056
2012-11-04 02:49:39	31.4	33.97		6.43245	-32.0082	-34.6279
2012-11-04 02:59:39	31.52	34.09		6.4394	-32.1305	-34.7503
2012-11-04 03:09:39	31.63	34.22		6.44634	-32.2426	-34.8828
2012-11-04 03:19:39	31.76	34.35		6.45329	-32.3751	-35.0153
2012-11-04 03:29:39	31.91	34.48		6.46023	-32.528	-35.1478	2012-11-04 03:29:39
2012-11-04 03:39:39	32.03	34.61		6.46718	-32.6504	-35.2803
2012-11-04 03:49:39	32.15	34.74		6.47412	-32.7727	-35.4128
2012-11-04 03:59:39	32.29	34.86		6.48106	-32.9154	-35.5352
2012-11-04 04:09:39	32.42	35		6.48801	-33.0479	-35.6779
2012-11-04 04:19:39	32.56	35.12		6.49495	-33.1906	-35.8002
2012-11-04 04:29:39	32.7	35.28		6.5019	-33.3333	-35.9633	2012-11-04 04:29:39
2012-11-04 04:39:39	32.83	35.41		6.50884	-33.4659	-36.0958
2012-11-04 04:49:39	32.96	35.54		6.51579	-33.5984	-36.2283
2012-11-04 04:59:39	33.1	35.67		6.52273	-33.7411	-36.3609
2012-11-04 05:09:39	33.22	35.8		6.52968	-33.8634	-36.4934
2012-11-04 05:19:39	33.35	35.92		6.53662	-33.9959	-36.6157
2012-11-04 05:29:39	33.48	36.05		6.54356	-34.1284	-36.7482	2012-11-04 05:29:39
2012-11-04 05:39:39	33.55	36.18		6.55051	-34.1998	-36.8807
2012-11-04 05:49:39	33.74	36.33		6.55745	-34.3935	-37.0336
2012-11-04 05:59:39	33.86	36.45		6.5644	-34.5158	-37.156
2012-11-04 06:09:39	34.01	36.58		6.57134	-34.6687	-37.2885
2012-11-04 06:19:39	34.14	36.73		6.57829	-34.8012	-37.4414
2012-11-04 06:29:39	34.27	36.85		6.58523	-34.9337	-37.5637	2012-11-04 06:29:39
2012-11-04 06:39:39	34.42	37		6.59218	-35.0866	-37.7166
2012-11-04 06:49:39	34.56	37.15		6.59912	-35.2294	-37.8695
2012-11-04 06:59:39	34.7	37.29		6.60606	-35.3721	-38.0122
2012-11-04 07:09:39	34.82	37.41		6.61301	-35.4944	-38.1346
2012-11-04 07:19:39	34.97	37.56		6.61995	-35.6473	-38.2875
2012-11-04 07:29:39	35.1	37.69		6.6269	-35.7798	-38.42	2012-11-04 07:29:39
2012-11-04 07:39:39	35.25	37.84		6.63384	-35.9327	-38.5729
2012-11-04 07:49:39	35.39	37.97		6.64079	-36.0754	-38.7054
2012-11-04 07:59:39	35.52	38.11		6.64773	-36.208	-38.8481
2012-11-04 08:09:39	35.64	38.22		6.65468	-36.3303	-38.9602
2012-11-04 08:19:39	35.75	38.34		6.66162	-36.4424	-39.0826
2012-11-04 08:29:39	35.86	38.45		6.66856	-36.5545	-39.1947	2012-11-04 08:29:39
2012-11-04 08:39:39	35.99	38.58		6.67551	-36.6871	-39.3272
2012-11-04 08:49:39	36.11	38.7		6.68245	-36.8094	-39.4495
2012-11-04 08:59:39	36.21	38.82		6.6894	-36.9113	-39.5719
2012-11-04 09:09:39	36.35	38.93		6.69634	-37.054	-39.684
2012-11-04 09:19:39	36.48	39.06		6.70329	-37.1865	-39.8165
2012-11-04 09:29:39	36.61	39.2		6.71023	-37.3191	-39.9592	2012-11-04 09:29:39
2012-11-04 09:39:39	36.74	39.33		6.71718	-37.4516	-40.0917
2012-11-04 09:49:39	36.87	39.46		6.72412	-37.5841	-40.2243
2012-11-04 09:59:39	37	39.59		6.73106	-37.7166	-40.3568
2012-11-04 10:09:39	37.13	39.7		6.73801	-37.8491	-40.4689
2012-11-04 10:19:39	37.28	39.83		6.74495	-38.002	-40.6014
2012-11-04 10:29:39	37.4	39.97		6.7519	-38.1244	-40.7441	2012-11-04 10:29:39
2012-11-04 10:39:39	37.54	40.09		6.75884	-38.2671	-40.8665
2012-11-04 10:49:39	37.65	40.21		6.76579	-38.3792	-40.9888
2012-11-04 10:59:39	37.79	40.36		6.77273	-38.5219	-41.1417
2012-11-04 11:09:39	37.94	40.5		6.77968	-38.6748	-41.2844
2012-11-04 11:19:39	38.09	40.63		6.78662	-38.8277	-41.4169
2012-11-04 11:29:39	38.18	40.75		6.79356	-38.9195	-41.5392	2012-11-04 11:29:39
2012-11-04 11:39:39	38.33	40.9		6.80051	-39.0724	-41.6922
2012-11-04 11:49:39	38.45	41.04		6.80745	-39.1947	-41.8349
2012-11-04 11:59:39	38.56	41.17		6.8144	-39.3068	-41.9674
2012-11-04 12:09:39	38.74	41.31		6.82134	-39.4903	-42.1101
2012-11-04 12:19:39	38.87	41.44		6.82829	-39.6228	-42.2426
2012-11-04 12:29:39	39.01	41.58		6.83523	-39.7655	-42.3853	2012-11-04 12:29:39
2012-11-04 12:39:39	39.15	41.74		6.84218	-39.9083	-42.5484
2012-11-04 12:49:39	39.27	41.84		6.84912	-40.0306	-42.6504
2012-11-04 12:59:39	39.42	41.99		6.85606	-40.1835	-42.8033
2012-11-04 13:09:39	39.53	42.1		6.86301	-40.2956	-42.9154
2012-11-04 13:19:39	39.67	42.24		6.86995	-40.4383	-43.0581
2012-11-04 13:29:39	39.82	42.39		6.8769	-40.5912	-43.211	2012-11-04 13:29:39
2012-11-04 13:39:39	39.97	42.54		6.88384	-40.7441	-43.3639
2012-11-04 13:49:39	40.13	42.7		6.89079	-40.9072	-43.527
2012-11-04 13:59:39	40.24	42.8		6.89773	-41.0194	-43.629
2012-11-04 14:09:39	40.4	42.96		6.90468	-41.1825	-43.792
2012-11-04 14:19:39	40.54	43.1		6.91162	-41.3252	-43.9348
2012-11-04 14:29:39	40.69	43.25		6.91856	-41.4781	-44.0877	2012-11-04 14:29:39
2012-11-04 14:39:39	40.85	43.42		6.92551	-41.6412	-44.261
2012-11-04 14:49:39	41.01	43.58		6.93245	-41.8043	-44.4241
2012-11-04 14:59:39	41.15	43.73		6.9394	-41.947	-44.577
2012-11-04 15:09:39	41.29	43.86		6.94634	-42.0897	-44.7095
2012-11-04 15:19:39	41.45	44.02		6.95329	-42.2528	-44.8726
2012-11-04 15:29:39	41.25	44.42		6.96023	-42.0489	-45.2803	2012-11-04 15:29:39
2012-11-04 15:39:39	41.45	44.03		6.96718	-42.2528	-44.8828
2012-11-04 15:49:39	41.77	44.35		6.97412	-42.579	-45.209
2012-11-04 15:59:39	41.9	44.47		6.98106	-42.7115	-45.3313
2012-11-04 16:09:39	42.08	44.64		6.98801	-42.895	-45.5046
2012-11-04 16:19:39	42.23	44.79		6.99495	-43.0479	-45.6575
2012-11-04 16:29:39	42.39	44.94		7.0019	-43.211	-45.8104	2012-11-04 16:29:39
2012-11-04 16:39:39	42.53	45.09		7.00884	-43.3537	-45.9633
2012-11-04 16:49:39	42.68	45.24		7.01579	-43.5066	-46.1162
2012-11-04 16:59:39	42.83	45.4		7.02273	-43.6595	-46.2793
2012-11-04 17:09:39	43.04	45.61		7.02968	-43.8736	-46.4934
2012-11-04 17:19:39	43.2	45.77		7.03662	-44.0367	-46.6565
2012-11-04 17:29:39	43.37	45.94		7.04356	-44.21	-46.8298	2012-11-04 17:29:39
2012-11-04 17:39:39	43.53	46.1		7.05051	-44.3731	-46.9929
2012-11-04 17:49:39	43.69	46.26		7.05745	-44.5362	-47.156
2012-11-04 17:59:39	43.83	46.4		7.0644	-44.6789	-47.2987
2012-11-04 18:09:39	43.99	46.55		7.07134	-44.842	-47.4516
2012-11-04 18:19:39	44.14	46.71		7.07829	-44.9949	-47.6147
2012-11-04 18:29:39	44.29	46.87		7.08523	-45.1478	-47.7778	2012-11-04 18:29:39
2012-11-04 18:39:39	44.48	47.06		7.09218	-45.3415	-47.9715
2012-11-04 18:49:39	44.68	47.25		7.09912	-45.5454	-48.1651
2012-11-04 18:59:39	44.85	47.43		7.10606	-45.7187	-48.3486
2012-11-04 19:09:39	45.03	47.62		7.11301	-45.9021	-48.5423
2012-11-04 19:19:39	45.25	47.82		7.11995	-46.1264	-48.7462
2012-11-04 19:29:39	45.21	47.8		7.1269	-46.0856	-48.7258	2012-11-04 19:29:39
2012-11-04 19:39:39	45.31	47.88		7.13384	-46.1876	-48.8073
2012-11-04 19:49:39	45.6	48.17		7.14079	-46.4832	-49.103
2012-11-04 19:59:39	45.8	48.38		7.14773	-46.6871	-49.317
2012-11-04 20:09:39	46	48.58		7.15468	-46.8909	-49.5209
2012-11-04 20:19:39	46.22	48.78		7.16162	-47.1152	-49.7248
2012-11-04 20:29:39	46.41	48.99		7.16856	-47.3089	-49.9388	2012-11-04 20:29:39
2012-11-04 20:39:39	46.63	49.21		7.17551	-47.5331	-50.1631
2012-11-04 20:49:39	46.82	49.39		7.18245	-47.7268	-50.3466
2012-11-04 20:59:39	47.03	49.6		7.1894	-47.9409	-50.5607
2012-11-04 21:09:39	47.19	49.75		7.19634	-48.104	-50.7136
2012-11-04 21:19:39	47.36	49.93		7.20329	-48.2773	-50.897
2012-11-04 21:29:39	47.55	50.13		7.21023	-48.4709	-51.1009	2012-11-04 21:29:39
2012-11-04 21:39:39	47.73	50.3		7.21718	-48.6544	-51.2742
2012-11-04 21:49:39	47.88	50.46		7.22412	-48.8073	-51.4373
2012-11-04 21:59:39	48.04	50.6		7.23106	-48.9704	-51.58
2012-11-04 22:09:39	48.23	50.8		7.23801	-49.1641	-51.7839
2012-11-04 22:19:39	48.4	50.97		7.24495	-49.3374	-51.9572
2012-11-04 22:29:39	48.58	51.15		7.2519	-49.5209	-52.1407	2012-11-04 22:29:39
2012-11-04 22:39:39	48.77	51.34		7.25884	-49.7146	-52.3344
2012-11-04 22:49:39	48.95	51.54		7.26579	-49.8981	-52.5382
2012-11-04 22:59:39	49.16	51.71		7.27273	-50.1121	-52.7115
2012-11-04 23:09:39	49.34	51.92		7.27968	-50.2956	-52.9256
2012-11-04 23:19:39	49.51	52.09		7.28662	-50.4689	-53.0989
2012-11-04 23:29:39	49.7	52.28		7.29356	-50.6626	-53.2926	2012-11-04 23:29:39
2012-11-04 23:39:39	49.85	52.42		7.30051	-50.8155	-53.4353
2012-11-04 23:49:39	50.03	52.62		7.30745	-50.999	-53.6391
2012-11-04 23:59:39	50.22	52.82		7.3144	-51.1927	-53.843
2012-11-05 00:09:39	50.43	53.01		7.32134	-51.4067	-54.0367
2012-11-05 00:19:39	50.63	53.22		7.32829	-51.6106	-54.2508
2012-11-05 00:29:39	50.84	53.42		7.33523	-51.8247	-54.4546	2012-11-05 00:29:39
2012-11-05 00:39:39	51.06	53.64		7.34218	-52.0489	-54.6789
2012-11-05 00:49:39	51.26	53.84		7.34912	-52.2528	-54.8828
2012-11-05 00:59:39	51.47	54.05		7.35606	-52.4669	-55.0968
2012-11-05 01:09:39	51.67	54.27		7.36301	-52.6707	-55.3211
2012-11-05 01:19:39	51.82	54.44		7.36995	-52.8236	-55.4944
2012-11-05 01:29:39	52.05	54.64		7.3769	-53.0581	-55.6983	2012-11-05 01:29:39
2012-11-05 01:39:39	52.28	54.85		7.38384	-53.2926	-55.9123
2012-11-05 01:49:39	52.44	55.03		7.39079	-53.4557	-56.0958
2012-11-05 01:59:39	52.66	55.26		7.39773	-53.6799	-56.3303
2012-11-05 02:09:39	52.88	55.47		7.40468	-53.9042	-56.5443
2012-11-05 02:19:39	53.1	55.69		7.41162	-54.1284	-56.7686
2012-11-05 02:29:39	53.3	55.9		7.41856	-54.3323	-56.9827	2012-11-05 02:29:39
2012-11-05 02:39:39	53.53	56.11		7.42551	-54.5668	-57.1967
2012-11-05 02:49:39	53.74	56.33		7.43245	-54.7808	-57.421
2012-11-05 02:59:39	53.94	56.53		7.4394	-54.9847	-57.6249
2012-11-05 03:09:39	54.16	56.76		7.44634	-55.209	-57.8593
2012-11-05 03:19:39	54.41	57.01		7.45329	-55.4638	-58.1142
2012-11-05 03:29:39	54.61	57.22		7.46023	-55.6677	-58.3282	2012-11-05 03:29:39
2012-11-05 03:39:39	54.84	57.43		7.46718	-55.9021	-58.5423
2012-11-05 03:49:39	55.04	57.65		7.47412	-56.106	-58.7666
2012-11-05 03:59:39	55.24	57.87		7.48106	-56.3099	-58.9908
2012-11-05 04:09:39	55.48	58.08		7.48801	-56.5545	-59.2049
2012-11-05 04:19:39	55.69	58.29		7.49495	-56.7686	-59.419
2012-11-05 04:29:39	55.91	58.51		7.5019	-56.9929	-59.6432	2012-11-05 04:29:39
2012-11-05 04:39:39	56.12	58.73		7.50884	-57.2069	-59.8675
2012-11-05 04:49:39	56.32	58.93		7.51579	-57.4108	-60.0714
2012-11-05 04:59:39	56.51	59.12		7.52273	-57.6045	-60.265
2012-11-05 05:09:39	56.73	59.33		7.52968	-57.8287	-60.4791
2012-11-05 05:19:39	56.92	59.53		7.53662	-58.0224	-60.683
2012-11-05 05:29:39	57.08	59.7		7.54356	-58.1855	-60.8563	2012-11-05 05:29:39
2012-11-05 05:39:39	57.31	59.92		7.55051	-58.42	-61.0805
2012-11-05 05:49:39	57.5	60.11		7.55745	-58.6137	-61.2742
2012-11-05 05:59:39	57.71	60.31		7.5644	-58.8277	-61.4781
2012-11-05 06:09:39	57.89	60.5		7.57134	-59.0112	-61.6718
2012-11-05 06:19:39	58.07	60.68		7.57829	-59.1947	-61.8552
2012-11-05 06:29:39	58.26	60.86		7.58523	-59.3884	-62.0387	2012-11-05 06:29:39
2012-11-05 06:39:39	58.48	61.08		7.59218	-59.6126	-62.263
2012-11-05 06:49:39	58.7	61.31		7.59912	-59.8369	-62.4975
2012-11-05 06:59:39	58.89	61.5		7.60606	-60.0306	-62.6911
2012-11-05 07:09:39	59.11	61.7		7.61301	-60.2548	-62.895
2012-11-05 07:19:39	59.28	61.9		7.61995	-60.4281	-63.0989
2012-11-05 07:29:39	59.49	62.1		7.6269	-60.6422	-63.3028	2012-11-05 07:29:39
2012-11-05 07:39:39	59.72	62.32		7.63384	-60.8767	-63.527
2012-11-05 07:49:39	59.87	62.51		7.64079	-61.0296	-63.7207
2012-11-05 07:59:39	60.12	62.73		7.64773	-61.2844	-63.945
2012-11-05 08:09:39	60.31	62.92		7.65468	-61.4781	-64.1386
2012-11-05 08:19:39	60.51	63.12		7.66162	-61.682	-64.3425
2012-11-05 08:29:39	60.68	63.32		7.66856	-61.8552	-64.5464	2012-11-05 08:29:39
2012-11-05 08:39:39	60.92	63.54		7.67551	-62.0999	-64.7706
2012-11-05 08:49:39	61.09	63.71		7.68245	-62.2732	-64.9439
2012-11-05 08:59:39	61.28	63.9		7.6894	-62.4669	-65.1376
2012-11-05 09:09:39	61.43	64.08		7.69634	-62.6198	-65.3211
2012-11-05 09:19:39	61.63	64.25		7.70329	-62.8236	-65.4944
2012-11-05 09:29:39	61.84	64.48		7.71023	-63.0377	-65.7288	2012-11-05 09:29:39
2012-11-05 09:39:39	62.04	64.67		7.71718	-63.2416	-65.9225
2012-11-05 09:49:39	62.24	64.87		7.72412	-63.4455	-66.1264
2012-11-05 09:59:39	62.44	65.07		7.73106	-63.6493	-66.3303
2012-11-05 10:09:39	62.62	65.26		7.73801	-63.8328	-66.524
2012-11-05 10:19:39	62.83	65.46		7.74495	-64.0469	-66.7278
2012-11-05 10:29:39	63.03	65.66		7.7519	-64.2508	-66.9317	2012-11-05 10:29:39
2012-11-05 10:39:39	63.23	65.87		7.75884	-64.4546	-67.1458
2012-11-05 10:49:39	63.46	66.08		7.76579	-64.6891	-67.3598
2012-11-05 10:59:39	63.67	66.31		7.77273	-64.9032	-67.5943
2012-11-05 11:09:39	63.75	66.45		7.77968	-64.9847	-67.737
2012-11-05 11:19:39	64.03	66.71		7.78662	-65.2701	-68.002
2012-11-05 11:29:39	64.23	66.9		7.79356	-65.474	-68.1957	2012-11-05 11:29:39
2012-11-05 11:39:39	64.42	67.08		7.80051	-65.6677	-68.3792
2012-11-05 11:49:39	64.61	67.31		7.80745	-65.8614	-68.6137
2012-11-05 11:59:39	64.86	67.53		7.8144	-66.1162	-68.8379
2012-11-05 12:09:39	65.08	67.74		7.82134	-66.3405	-69.052
2012-11-05 12:19:39	65.31	67.96		7.82829	-66.5749	-69.2762
2012-11-05 12:29:39	65.55	68.22		7.83523	-66.8196	-69.5413	2012-11-05 12:29:39
2012-11-05 12:39:39	65.74	68.45		7.84218	-67.0133	-69.7757
2012-11-05 12:49:39	65.99	68.69		7.84912	-67.2681	-70.0204
2012-11-05 12:59:39	66.24	68.9		7.85606	-67.5229	-70.2345
2012-11-05 13:09:39	66.48	69.16		7.86301	-67.7676	-70.4995
2012-11-05 13:19:39	66.73	69.41		7.86995	-68.0224	-70.7543
2012-11-05 13:29:39	66.95	69.63		7.8769	-68.2467	-70.9786	2012-11-05 13:29:39
2012-11-05 13:39:39	67.17	69.85		7.88384	-68.4709	-71.2029
2012-11-05 13:49:39	67.39	70.11		7.89079	-68.6952	-71.4679
2012-11-05 13:59:39	67.63	70.32		7.89773	-68.9399	-71.682
2012-11-05 14:09:39	67.9	70.59		7.90468	-69.2151	-71.9572
2012-11-05 14:19:39	68.12	70.8		7.91162	-69.4393	-72.1713
2012-11-05 14:29:39	68.34	71.04		7.91856	-69.6636	-72.4159	2012-11-05 14:29:39
2012-11-05 14:39:39	68.54	71.25		7.92551	-69.8675	-72.63
2012-11-05 14:49:39	68.79	71.48		7.93245	-70.1223	-72.8644
2012-11-05 14:59:39	69	71.71		7.9394	-70.3364	-73.0989
2012-11-05 15:09:39	69.24	71.93		7.94634	-70.581	-73.3231
2012-11-05 15:19:39	69.48	72.16		7.95329	-70.8257	-73.5576
2012-11-05 15:29:39	69.79	72.48		7.96023	-71.1417	-73.8838	2012-11-05 15:29:39
2012-11-05 15:39:39	69.23	71.94		7.96718	-70.5708	-73.3333
2012-11-05 15:49:39	70.03	72.75		7.97412	-71.3863	-74.159
2012-11-05 15:59:39	70.31	73		7.98106	-71.6718	-74.4139
2012-11-05 16:09:39	70.55	73.22		7.98801	-71.9164	-74.6381
2012-11-05 16:19:39	70.8	73.48		7.99495	-72.1713	-74.9032
2012-11-05 16:29:39	71.02	73.7		8.0019	-72.3955	-75.1274	2012-11-05 16:29:39
2012-11-05 16:39:39	71.27	73.94		8.00884	-72.6504	-75.3721
2012-11-05 16:49:39	71.46	74.17		8.01579	-72.844	-75.6065
2012-11-05 16:59:39	71.73	74.43		8.02273	-73.1193	-75.8716
2012-11-05 17:09:39	72	74.69		8.02968	-73.3945	-76.1366
2012-11-05 17:19:39	72.23	74.92		8.03662	-73.629	-76.371
2012-11-05 17:29:39	72.49	75.18		8.04356	-73.894	-76.6361	2012-11-05 17:29:39
2012-11-05 17:39:39	72.71	75.41		8.05051	-74.1182	-76.8705
2012-11-05 17:49:39	72.94	75.65		8.05745	-74.3527	-77.1152
2012-11-05 17:59:39	73.21	75.91		8.0644	-74.6279	-77.3802
2012-11-05 18:09:39	73.46	76.16		8.07134	-74.8828	-77.6351
2012-11-05 18:19:39	73.68	76.38		8.07829	-75.107	-77.8593
2012-11-05 18:29:39	73.87	76.56		8.08523	-75.3007	-78.0428	2012-11-05 18:29:39
2012-11-05 18:39:39	74.13	76.86		8.09218	-75.5657	-78.3486
2012-11-05 18:49:39	74.38	77.08		8.09912	-75.8206	-78.5729
2012-11-05 18:59:39	74.63	77.34		8.10606	-76.0754	-78.8379
2012-11-05 19:09:39	74.86	77.57		8.11301	-76.3099	-79.0724
2012-11-05 19:19:39	75.1	77.83		8.11995	-76.5545	-79.3374
2012-11-05 19:29:39	75.37	78.09		8.1269	-76.8298	-79.6024	2012-11-05 19:29:39
2012-11-05 19:39:39	75.62	78.33		8.13384	-77.0846	-79.8471
2012-11-05 19:49:39	75.86	78.59		8.14079	-77.3293	-80.1121
2012-11-05 19:59:39	76.09	78.81		8.14773	-77.5637	-80.3364
2012-11-05 20:09:39	76.24	78.98		8.15468	-77.7166	-80.5097
2012-11-05 20:19:39	76.52	79.24		8.16162	-78.002	-80.7747
2012-11-05 20:29:39	76.79	79.5		8.16856	-78.2773	-81.0398	2012-11-05 20:29:39
2012-11-05 20:39:39	77.04	79.76		8.17551	-78.5321	-81.3048
2012-11-05 20:49:39	77.27	79.99		8.18245	-78.7666	-81.5392
2012-11-05 20:59:39	77.5	80.22		8.1894	-79.001	-81.7737
2012-11-05 21:09:39	77.73	80.47		8.19634	-79.2355	-82.0285
2012-11-05 21:19:39	77.99	80.7		8.20329	-79.5005	-82.263
2012-11-05 21:29:39	78.23	80.96		8.21023	-79.7452	-82.528	2012-11-05 21:29:39
2012-11-05 21:39:39	78.44	81.19		8.21718	-79.9592	-82.7625
2012-11-05 21:49:39	78.68	81.41		8.22412	-80.2039	-82.9867
2012-11-05 21:59:39	78.91	81.64		8.23106	-80.4383	-83.2212
2012-11-05 22:09:39	79.16	81.9		8.23801	-80.6932	-83.4862
2012-11-05 22:19:39	79.41	82.15		8.24495	-80.948	-83.7411
2012-11-05 22:29:39	79.63	82.37		8.2519	-81.1723	-83.9653	2012-11-05 22:29:39
2012-11-05 22:39:39	79.87	82.6		8.25884	-81.4169	-84.1998
2012-11-05 22:49:39	80.12	82.85		8.26579	-81.6718	-84.4546
2012-11-05 22:59:39	80.35	83.09		8.27273	-81.9062	-84.6993
2012-11-05 23:09:39	80.61	83.35		8.27968	-82.1713	-84.9643
2012-11-05 23:19:39	80.85	83.58		8.28662	-82.4159	-85.1988
2012-11-05 23:29:39	81.07	83.82		8.29356	-82.6402	-85.4434	2012-11-05 23:29:39
2012-11-05 23:39:39	81.3	84.05		8.30051	-82.8746	-85.6779
2012-11-05 23:49:39	81.55	84.31		8.30745	-83.1295	-85.9429
2012-11-05 23:59:39	81.8	84.57		8.3144	-83.3843	-86.208
2012-11-06 00:09:39	82.06	84.81		8.32134	-83.6493	-86.4526
2012-11-06 00:19:39	82.28	85.05		8.32829	-83.8736	-86.6972
2012-11-06 00:29:39	82.52	85.26		8.33523	-84.1182	-86.9113	2012-11-06 00:29:39
2012-11-06 00:39:39	82.71	85.52		8.34218	-84.3119	-87.1764
2012-11-06 00:49:39	83.01	85.8		8.34912	-84.6177	-87.4618
2012-11-06 00:59:39	83.24	86.03		8.35606	-84.8522	-87.6962
2012-11-06 01:09:39	83.51	86.28		8.36301	-85.1274	-87.9511
2012-11-06 01:19:39	79.74	86.67		8.36995	-81.2844	-88.3486
2012-11-06 01:29:39	84.03	86.81		8.3769	-85.6575	-88.4913	2012-11-06 01:29:39
2012-11-06 01:39:39	84.29	87.06		8.38384	-85.9225	-88.7462
2012-11-06 01:49:39	84.53	87.32		8.39079	-86.1672	-89.0112
2012-11-06 01:59:39	84.79	87.58		8.39773	-86.4322	-89.2762
2012-11-06 02:09:39	85.05	87.85		8.40468	-86.6972	-89.5515
2012-11-06 02:19:39	85.3	88.11		8.41162	-86.9521	-89.8165
2012-11-06 02:29:39	85.56	88.38		8.41856	-87.2171	-90.0917	2012-11-06 02:29:39
2012-11-06 02:39:39	85.82	88.62		8.42551	-87.4822	-90.3364
2012-11-06 02:49:39	86.09	88.89		8.43245	-87.7574	-90.6116
2012-11-06 02:59:39	86.35	89.15		8.4394	-88.0224	-90.8767
2012-11-06 03:09:39	86.61	89.39		8.44634	-88.2875	-91.1213
2012-11-06 03:19:39	86.87	89.68		8.45329	-88.5525	-91.4169
2012-11-06 03:29:39	87.12	89.95		8.46023	-88.8073	-91.6922	2012-11-06 03:29:39
2012-11-06 03:39:39	87.38	90.22		8.46718	-89.0724	-91.9674
2012-11-06 03:49:39	87.69	90.5		8.47412	-89.3884	-92.2528
2012-11-06 03:59:39	87.92	90.75		8.48106	-89.6228	-92.5076
2012-11-06 04:09:39	88.19	91.01		8.48801	-89.8981	-92.7727
2012-11-06 04:19:39	88.45	91.27		8.49495	-90.1631	-93.0377
2012-11-06 04:29:39	88.71	91.54		8.5019	-90.4281	-93.3129	2012-11-06 04:29:39
2012-11-06 04:39:39	88.98	91.81		8.50884	-90.7034	-93.5882
2012-11-06 04:49:39	89.21	92.07		8.51579	-90.9378	-93.8532
2012-11-06 04:59:39	89.51	92.35		8.52273	-91.2436	-94.1386
2012-11-06 05:09:39	89.77	92.58		8.52968	-91.5087	-94.3731
2012-11-06 05:19:39	90.02	92.88		8.53662	-91.7635	-94.6789
2012-11-06 05:29:39	90.27	93.11		8.54356	-92.0183	-94.9134	2012-11-06 05:29:39
2012-11-06 05:39:39	90.52	93.38		8.55051	-92.2732	-95.1886
2012-11-06 05:49:39	90.8	93.65		8.55745	-92.5586	-95.4638
2012-11-06 05:59:39	91.06	93.92		8.5644	-92.8236	-95.739
2012-11-06 06:09:39	91.32	94.18		8.57134	-93.0887	-96.0041
2012-11-06 06:19:39	91.57	94.45		8.57829	-93.3435	-96.2793
2012-11-06 06:29:39	91.88	94.75		8.58523	-93.6595	-96.5851	2012-11-06 06:29:39
2012-11-06 06:39:39	92.16	95.01		8.59218	-93.945	-96.8502
2012-11-06 06:49:39	92.4	95.25		8.59912	-94.1896	-97.0948
2012-11-06 06:59:39	92.66	95.53		8.60606	-94.4546	-97.3802
2012-11-06 07:09:39	92.91	95.76		8.61301	-94.7095	-97.6147
2012-11-06 07:19:39	93.17	96.04		8.61995	-94.9745	-97.9001
2012-11-06 07:29:39	93.43	96.31		8.6269	-95.2396	-98.1753	2012-11-06 07:29:39
2012-11-06 07:39:39	93.7	96.56		8.63384	-95.5148	-98.4302
2012-11-06 07:49:39	93.93	96.79		8.64079	-95.7492	-98.6646
2012-11-06 07:59:39	94.19	97.09		8.64773	-96.0143	-98.9704
2012-11-06 08:09:39	94.46	97.35		8.65468	-96.2895	-99.2355
2012-11-06 08:19:39	94.72	97.61		8.66162	-96.5545	-99.5005
2012-11-06 08:29:39	94.96	97.88		8.66856	-96.7992	-99.7757	2012-11-06 08:29:39
2012-11-06 08:39:39	95.22	98.14		8.67551	-97.0642	-100.041
2012-11-06 08:49:39	95.48	98.36		8.68245	-97.3293	-100.265
2012-11-06 08:59:39	95.71	98.65		8.6894	-97.5637	-100.561
2012-11-06 09:09:39	96.01	98.92		8.69634	-97.8695	-100.836
2012-11-06 09:19:39	96.27	99.19		8.70329	-98.1346	-101.111
2012-11-06 09:29:39	96.54	99.46		8.71023	-98.4098	-101.386	2012-11-06 09:29:39
2012-11-06 09:39:39	96.84	99.77		8.71718	-98.7156	-101.702
2012-11-06 09:49:39	97.1	100.03		8.72412	-98.9806	-101.967
2012-11-06 09:59:39	97.34	100.3		8.73106	-99.2253	-102.243
2012-11-06 10:09:39	97.65	100.58		8.73801	-99.5413	-102.528
2012-11-06 10:19:39	97.93	100.87		8.74495	-99.8267	-102.824
2012-11-06 10:29:39	98.24	101.19		8.7519	-100.143	-103.15	2012-11-06 10:29:39
2012-11-06 10:39:39	98.53	101.45		8.75884	-100.438	-103.415
2012-11-06 10:49:39	98.79	101.76		8.76579	-100.703	-103.731
2012-11-06 10:59:39	99.07	102.01		8.77273	-100.989	-103.986
2012-11-06 11:09:39	99.21	102.27		8.77968	-101.131	-104.251
2012-11-06 11:19:39	99.57	102.53		8.78662	-101.498	-104.516
2012-11-06 11:29:39	99.49	102.67		8.79356	-101.417	-104.659	2012-11-06 11:29:39
2012-11-06 11:39:39	100.06	103.07		8.80051	-101.998	-105.066
2012-11-06 11:49:39	100.35	103.33		8.80745	-102.294	-105.331
2012-11-06 11:59:39	100.61	103.63		8.8144	-102.559	-105.637
2012-11-06 12:09:39	100.89	103.87		8.82134	-102.844	-105.882
2012-11-06 12:19:39	101.16	104.18		8.82829	-103.119	-106.198
2012-11-06 12:29:39	101.46	104.47		8.83523	-103.425	-106.493	2012-11-06 12:29:39
2012-11-06 12:39:39	101.72	104.75		8.84218	-103.69	-106.779
2012-11-06 12:49:39	101.99	105.04		8.84912	-103.965	-107.074
2012-11-06 12:59:39	102.24	105.29		8.85606	-104.22	-107.329
2012-11-06 13:09:39	102.52	105.58		8.86301	-104.506	-107.625
2012-11-06 13:19:39	102.79	105.8		8.86995	-104.781	-107.849
2012-11-06 13:29:39	103.04	106.08		8.8769	-105.036	-108.135	2012-11-06 13:29:39
2012-11-06 13:39:39	103.35	106.41		8.88384	-105.352	-108.471
2012-11-06 13:49:39	103.61	106.69		8.89079	-105.617	-108.756
2012-11-06 13:59:39	103.9	106.97		8.89773	-105.912	-109.042
2012-11-06 14:09:39	104.19	107.25		8.90468	-106.208	-109.327
2012-11-06 14:19:39	104.48	107.52		8.91162	-106.504	-109.602
2012-11-06 14:29:39	104.73	107.8		8.91856	-106.758	-109.888	2012-11-06 14:29:39
2012-11-06 14:39:39	104.97	108.06		8.92551	-107.003	-110.153
2012-11-06 14:49:39	105.29	108.37		8.93245	-107.329	-110.469
2012-11-06 14:59:39	105.54	108.64		8.9394	-107.584	-110.744
2012-11-06 15:09:39	105.82	108.93		8.94634	-107.87	-111.04
2012-11-06 15:19:39	106.1	109.23		8.95329	-108.155	-111.346
2012-11-06 15:29:39	106.4	109.5		8.96023	-108.461	-111.621	2012-11-06 15:29:39
2012-11-06 15:39:39	106.67	109.78		8.96718	-108.736	-111.906
2012-11-06 15:49:39	106.97	110.08		8.97412	-109.042	-112.212
2012-11-06 15:59:39	107.25	110.38		8.98106	-109.327	-112.518
2012-11-06 16:09:39	107.55	110.66		8.98801	-109.633	-112.803
2012-11-06 16:19:39	107.84	111.01		8.99495	-109.929	-113.16
2012-11-06 16:29:39	108.15	111.31		9.0019	-110.245	-113.466	2012-11-06 16:29:39
2012-11-06 16:39:39	108.46	111.64		9.00884	-110.561	-113.802
2012-11-06 16:49:39	108.81	112.06		9.01579	-110.917	-114.23
2012-11-06 16:59:39	108.98	112.36		9.02273	-111.091	-114.536
2012-11-06 17:09:39	109.24	112.58		9.02968	-111.356	-114.76
2012-11-06 17:19:39	109.76	113.09		9.03662	-111.886	-115.28
2012-11-06 17:29:39	110.18	113.42		9.04356	-112.314	-115.617	2012-11-06 17:29:39
2012-11-06 17:39:39	110.49	113.74		9.05051	-112.63	-115.943
2012-11-06 17:49:39	110.85	114.03		9.05745	-112.997	-116.239
2012-11-06 17:59:39	111.19	114.43		9.0644	-113.344	-116.646
2012-11-06 18:09:39	111.51	114.75		9.07134	-113.67	-116.972
2012-11-06 18:19:39	111.83	115.07		9.07829	-113.996	-117.299
2012-11-06 18:29:39	112.16	115.45		9.08523	-114.332	-117.686	2012-11-06 18:29:39
2012-11-06 18:39:39	112.51	115.8		9.09218	-114.689	-118.043
2012-11-06 18:49:39	112.86	116.14		9.09912	-115.046	-118.389
2012-11-06 18:59:39	113.2	116.52		9.10606	-115.392	-118.777
2012-11-06 19:09:39	113.57	116.88		9.11301	-115.77	-119.144
2012-11-06 19:19:39	113.96	117.28		9.11995	-116.167	-119.551
2012-11-06 19:29:39	114.33	117.68		9.1269	-116.544	-119.959	2012-11-06 19:29:39
2012-11-06 19:39:39	114.67	117.93		9.13384	-116.891	-120.214
2012-11-06 19:49:39	115.04	118.39		9.14079	-117.268	-120.683
2012-11-06 19:59:39	115.4	118.78		9.14773	-117.635	-121.081
2012-11-06 20:09:39	115.75	119.15		9.15468	-117.992	-121.458
2012-11-06 20:19:39	116.17	119.55		9.16162	-118.42	-121.865
2012-11-06 20:29:39	116.59	120.02		9.16856	-118.848	-122.345	2012-11-06 20:29:39
2012-11-06 20:39:39	116.9	120.33		9.17551	-119.164	-122.661
2012-11-06 20:49:39	117.3	120.73		9.18245	-119.572	-123.068
2012-11-06 20:59:39	117.61	121.04		9.1894	-119.888	-123.384
2012-11-06 21:09:39	118.06	121.47		9.19634	-120.347	-123.823
2012-11-06 21:19:39	118.41	121.8		9.20329	-120.703	-124.159
2012-11-06 21:29:39	118.79	122.17		9.21023	-121.091	-124.536	2012-11-06 21:29:39
2012-11-06 21:39:39	119.18	122.51		9.21718	-121.488	-124.883
2012-11-06 21:49:39	119.49	122.91		9.22412	-121.804	-125.291
2012-11-06 21:59:39	119.85	123.29		9.23106	-122.171	-125.678
2012-11-06 22:09:39	120.1	123.61		9.23801	-122.426	-126.004
2012-11-06 22:19:39	120.54	123.99		9.24495	-122.875	-126.391
2012-11-06 22:29:39	120.86	124.33		9.2519	-123.201	-126.738	2012-11-06 22:29:39
2012-11-06 22:39:39	120.99	124.46		9.25884	-123.333	-126.871
2012-11-06 22:49:39	121.55	125.06		9.26579	-123.904	-127.482
2012-11-06 22:59:39	121.9	125.42		9.27273	-124.261	-127.849
2012-11-06 23:09:39	122.26	125.82		9.27968	-124.628	-128.257
2012-11-06 23:19:39	122.59	126.2		9.28662	-124.964	-128.644
2012-11-06 23:29:39	122.96	126.54		9.29356	-125.341	-128.991	2012-11-06 23:29:39
2012-11-06 23:39:39	123.35	126.94		9.30051	-125.739	-129.399
2012-11-06 23:49:39	123.67	127.28		9.30745	-126.065	-129.745
2012-11-06 23:59:39	124.1	127.71		9.3144	-126.504	-130.183
2012-11-07 00:09:39	124.5	128.13		9.32134	-126.911	-130.612
2012-11-07 00:19:39	124.88	128.44		9.32829	-127.299	-130.928
2012-11-07 00:29:39	125.24	128.83		9.33523	-127.666	-131.325	2012-11-07 00:29:39
2012-11-07 00:39:39	125.6	129.21		9.34218	-128.033	-131.713
2012-11-07 00:49:39	125.95	129.53		9.34912	-128.389	-132.039
2012-11-07 00:59:39	126.32	129.94		9.35606	-128.767	-132.457
2012-11-07 01:09:39	126.66	130.32		9.36301	-129.113	-132.844
2012-11-07 01:19:39	127.02	130.66		9.36995	-129.48	-133.191
2012-11-07 01:29:39	127.39	131		9.3769	-129.857	-133.537	2012-11-07 01:29:39
2012-11-07 01:39:39	127.74	131.37		9.38384	-130.214	-133.914
2012-11-07 01:49:39	128.08	131.8		9.39079	-130.561	-134.353
2012-11-07 01:59:39	128.43	132.14		9.39773	-130.917	-134.699
2012-11-07 02:09:39	128.83	132.56		9.40468	-131.325	-135.127
2012-11-07 02:19:39	129.15	132.88		9.41162	-131.651	-135.454
2012-11-07 02:29:39	129.51	133.29		9.41856	-132.018	-135.872	2012-11-07 02:29:39
2012-11-07 02:39:39	129.87	133.63		9.42551	-132.385	-136.218
2012-11-07 02:49:39	130.24	133.99		9.43245	-132.762	-136.585
2012-11-07 02:59:39	130.62	134.41		9.4394	-133.15	-137.013
2012-11-07 03:09:39	130.94	134.81		9.44634	-133.476	-137.421
2012-11-07 03:19:39	131.36	135.19		9.45329	-133.904	-137.808
2012-11-07 03:29:39	131.72	135.55		9.46023	-134.271	-138.175	2012-11-07 03:29:39
2012-11-07 03:39:39	132.08	135.83		9.46718	-134.638	-138.461
2012-11-07 03:49:39	132.42	136.33		9.47412	-134.985	-138.97
2012-11-07 03:59:39	132.77	136.73		9.48106	-135.341	-139.378
2012-11-07 04:09:39	133.17	137.12		9.48801	-135.749	-139.776
2012-11-07 04:19:39	133.54	137.48		9.49495	-136.126	-140.143
2012-11-07 04:29:39	133.93	137.85		9.5019	-136.524	-140.52	2012-11-07 04:29:39
2012-11-07 04:39:39	134.29	138.25		9.50884	-136.891	-140.928
2012-11-07 04:49:39	134.67	138.64		9.51579	-137.278	-141.325
2012-11-07 04:59:39	135.07	139.02		9.52273	-137.686	-141.713
2012-11-07 05:09:39	135.41	139.43		9.52968	-138.033	-142.13
2012-11-07 05:19:39	135.83	139.82		9.53662	-138.461	-142.528
2012-11-07 05:29:39	134.39	140.18		9.54356	-136.993	-142.895	2012-11-07 05:29:39
2012-11-07 05:39:39	136.46	140.46		9.55051	-139.103	-143.18
2012-11-07 05:49:39	136.84	140.86		9.55745	-139.49	-143.588
2012-11-07 05:59:39	137.22	141.25		9.5644	-139.878	-143.986
2012-11-07 06:09:39	137.56	141.62		9.57134	-140.224	-144.363
2012-11-07 06:19:39	137.93	142.02		9.57829	-140.601	-144.771
2012-11-07 06:29:39	138.3	142.41		9.58523	-140.979	-145.168	2012-11-07 06:29:39
2012-11-07 06:39:39	138.69	142.82		9.59218	-141.376	-145.586
2012-11-07 06:49:39	139.08	143.22		9.59912	-141.774	-145.994
2012-11-07 06:59:39	139.02	143.57		9.60606	-141.713	-146.351
2012-11-07 07:09:39	139.76	143.94		9.61301	-142.467	-146.728
2012-11-07 07:19:39	140.13	144.27		9.61995	-142.844	-147.064
2012-11-07 07:29:39	140.48	144.66		9.6269	-143.201	-147.462	2012-11-07 07:29:39
2012-11-07 07:39:39	140.7	144.94		9.63384	-143.425	-147.747
2012-11-07 07:49:39	141.11	145.28		9.64079	-143.843	-148.094
2012-11-07 07:59:39	141.36	145.64		9.64773	-144.098	-148.461
2012-11-07 08:09:39	141.78	145.92		9.65468	-144.526	-148.746
2012-11-07 08:19:39	142.11	146.31		9.66162	-144.862	-149.144
2012-11-07 08:29:39	142.34	146.55		9.66856	-145.097	-149.388	2012-11-07 08:29:39
2012-11-07 08:39:39	142.63	146.89		9.67551	-145.392	-149.735
2012-11-07 08:49:39	142.94	147.24		9.68245	-145.708	-150.092
2012-11-07 08:59:39	143.18	147.56		9.6894	-145.953	-150.418
2012-11-07 09:09:39	143.49	147.84		9.69634	-146.269	-150.703
2012-11-07 09:19:39	143.79	148.17		9.70329	-146.575	-151.04
2012-11-07 09:29:39	144.08	148.53		9.71023	-146.871	-151.407	2012-11-07 09:29:39
2012-11-07 09:39:39	144.41	148.81		9.71718	-147.207	-151.692
2012-11-07 09:49:39	144.76	149.2		9.72412	-147.564	-152.09
2012-11-07 09:59:39	145.06	149.51		9.73106	-147.87	-152.406
2012-11-07 10:09:39	145.28	149.79		9.73801	-148.094	-152.691
2012-11-07 10:19:39	145.49	150.12		9.74495	-148.308	-153.028
2012-11-07 10:29:39	145.91	150.43		9.7519	-148.736	-153.344	2012-11-07 10:29:39
2012-11-07 10:39:39	146.25	150.75		9.75884	-149.083	-153.67
2012-11-07 10:49:39	146.55	151.05		9.76579	-149.388	-153.976
2012-11-07 10:59:39	146.81	151.4		9.77273	-149.653	-154.332
2012-11-07 11:09:39	147.09	151.67		9.77968	-149.939	-154.608
2012-11-07 11:19:39	147.42	151.95		9.78662	-150.275	-154.893
2012-11-07 11:29:39	147.65	152.28		9.79356	-150.51	-155.229	2012-11-07 11:29:39
2012-11-07 11:39:39	147.92	152.55		9.80051	-150.785	-155.505
2012-11-07 11:49:39	148.24	152.95		9.80745	-151.111	-155.912
2012-11-07 11:59:39	148.46	153.22		9.8144	-151.335	-156.188
2012-11-07 12:09:39	148.79	153.51		9.82134	-151.672	-156.483
2012-11-07 12:19:39	149.1	153.84		9.82829	-151.988	-156.82
2012-11-07 12:29:39	149.36	154.14		9.83523	-152.253	-157.125	2012-11-07 12:29:39
2012-11-07 12:39:39	149.68	154.46		9.84218	-152.579	-157.452
2012-11-07 12:49:39	149.94	154.77		9.84912	-152.844	-157.768
2012-11-07 12:59:39	150.22	155.03		9.85606	-153.129	-158.033
2012-11-07 13:09:39	150.57	155.36		9.86301	-153.486	-158.369
2012-11-07 13:19:39	150.85	155.66		9.86995	-153.772	-158.675
2012-11-07 13:29:39	151.15	156.02		9.8769	-154.077	-159.042	2012-11-07 13:29:39
2012-11-07 13:39:39	151.45	156.31		9.88384	-154.383	-159.337
2012-11-07 13:49:39	151.75	156.64		9.89079	-154.689	-159.674
2012-11-07 13:59:39	152.01	156.94		9.89773	-154.954	-159.98
2012-11-07 14:09:39	152.31	157.24		9.90468	-155.26	-160.285
2012-11-07 14:19:39	152.56	157.58		9.91162	-155.515	-160.632
2012-11-07 14:29:39	152.86	157.82		9.91856	-155.821	-160.877	2012-11-07 14:29:39
2012-11-07 14:39:39	153.14	158.18		9.92551	-156.106	-161.244
2012-11-07 14:49:39	153.42	158.45		9.93245	-156.391	-161.519
2012-11-07 14:59:39	153.73	158.77		9.9394	-156.707	-161.845
2012-11-07 15:09:39	154.01	159.09		9.94634	-156.993	-162.171
2012-11-07 15:19:39	154.28	159.37		9.95329	-157.268	-162.457
2012-11-07 15:29:39	154.57	159.69		9.96023	-157.564	-162.783	2012-11-07 15:29:39
2012-11-07 15:39:39	154.85	160.01		9.96718	-157.849	-163.109
2012-11-07 15:49:39	155.11	160.31		9.97412	-158.114	-163.415
2012-11-07 15:59:39	155.41	160.6		9.98106	-158.42	-163.71
2012-11-07 16:09:39	155.68	160.91		9.98801	-158.695	-164.027
2012-11-07 16:19:39	155.98	161.21		9.99495	-159.001	-164.332
2012-11-07 16:29:39	156.2	161.5		10.0019	-159.225	-164.628	2012-11-07 16:29:39
2012-11-07 16:39:39	156.47	161.76		10.0088	-159.501	-164.893
2012-11-07 16:49:39	156.71	162.1		10.0158	-159.745	-165.24
2012-11-07 16:59:39	156.72	161.97		10.0227	-159.755	-165.107
2012-11-07 17:09:39	156.92	162.01		10.0297	-159.959	-165.148
2012-11-07 17:19:39	157.2	162.84		10.0366	-160.245	-165.994
2012-11-07 17:29:39	157.49	163.19		10.0436	-160.54	-166.351	2012-11-07 17:29:39
2012-11-07 17:39:39	157.8	163.46		10.0505	-160.856	-166.626
2012-11-07 17:49:39	158.09	163.78		10.0575	-161.152	-166.952
2012-11-07 17:59:39	158.41	164.12		10.0644	-161.478	-167.299
2012-11-07 18:09:39	158.72	164.45		10.0713	-161.794	-167.635
2012-11-07 18:19:39	158.93	164.81		10.0783	-162.008	-168.002
2012-11-07 18:29:39	159.27	165.03		10.0852	-162.355	-168.226	2012-11-07 18:29:39
2012-11-07 18:39:39	159.56	165.4		10.0922	-162.65	-168.603
2012-11-07 18:49:39	159.86	165.66		10.0991	-162.956	-168.869
2012-11-07 18:59:39	160.09	166.03		10.1061	-163.191	-169.246
2012-11-07 19:09:39	160.35	166.31		10.113	-163.456	-169.531
2012-11-07 19:19:39	160.66	166.69		10.12	-163.772	-169.918
2012-11-07 19:29:39	160.94	166.95		10.1269	-164.057	-170.183	2012-11-07 19:29:39
2012-11-07 19:39:39	161.23	167.25		10.1338	-164.353	-170.489
2012-11-07 19:49:39	161.52	167.56		10.1408	-164.648	-170.805
2012-11-07 19:59:39	161.76	167.82		10.1477	-164.893	-171.07
2012-11-07 20:09:39	162.06	168.14		10.1547	-165.199	-171.397
2012-11-07 20:19:39	162.28	168.43		10.1616	-165.423	-171.692
2012-11-07 20:29:39	162.37	168.75		10.1686	-165.515	-172.018	2012-11-07 20:29:39
2012-11-07 20:39:39	162.81	169.07		10.1755	-165.963	-172.345
2012-11-07 20:49:39	163.09	169.34		10.1825	-166.249	-172.62
2012-11-07 20:59:39	163.35	169.66		10.1894	-166.514	-172.946
2012-11-07 21:09:39	163.61	169.99		10.1963	-166.779	-173.282
2012-11-07 21:19:39	163.85	170.25		10.2033	-167.023	-173.547
2012-11-07 21:29:39	164.1	170.49		10.2102	-167.278	-173.792	2012-11-07 21:29:39
2012-11-07 21:39:39	164.38	170.84		10.2172	-167.564	-174.149
2012-11-07 21:49:39	164.62	171.11		10.2241	-167.808	-174.424
2012-11-07 21:59:39	164.86	171.38		10.2311	-168.053	-174.699
2012-11-07 22:09:39	165.11	171.69		10.238	-168.308	-175.015
2012-11-07 22:19:39	165.36	171.96		10.245	-168.563	-175.291
2012-11-07 22:29:39	165.54	172.23		10.2519	-168.746	-175.566	2012-11-07 22:29:39
2012-11-07 22:39:39	165.79	172.47		10.2588	-169.001	-175.81
2012-11-07 22:49:39	166.03	172.78		10.2658	-169.246	-176.126
2012-11-07 22:59:39	166.28	173.03		10.2727	-169.501	-176.381
2012-11-07 23:09:39	166.69	173.5		10.2797	-169.918	-176.86
2012-11-07 23:19:39	166.92	173.79		10.2866	-170.153	-177.156
2012-11-07 23:29:39	167.13	174.05		10.2936	-170.367	-177.421	2012-11-07 23:29:39
2012-11-07 23:39:39	167.37	174.32		10.3005	-170.612	-177.696
2012-11-07 23:49:39	167.62	174.6		10.3075	-170.866	-177.982
2012-11-07 23:59:39	167.8	174.83		10.3144	-171.05	-178.216
2012-11-08 00:09:39	168.01	175.05		10.3213	-171.264	-178.44
2012-11-08 00:19:39	168.22	175.35		10.3283	-171.478	-178.746
2012-11-08 00:29:39	168.42	175.61		10.3352	-171.682	-179.011	2012-11-08 00:29:39
2012-11-08 00:39:39	168.66	175.88		10.3422	-171.927	-179.286
2012-11-08 00:49:39	168.85	176.11		10.3491	-172.12	-179.521
2012-11-08 00:59:39	169.06	176.33		10.3561	-172.334	-179.745
2012-11-08 01:09:39	169.22	176.61		10.363	-172.497	-180.031
2012-11-08 01:19:39	169.46	176.87		10.37	-172.742	-180.296
2012-11-08 01:29:39	169.67	177.14		10.3769	-172.956	-180.571	2012-11-08 01:29:39
2012-11-08 01:39:39	169.85	177.36		10.3838	-173.14	-180.795
2012-11-08 01:49:39	170.07	177.6		10.3908	-173.364	-181.04
2012-11-08 01:59:39	170.25	177.93		10.3977	-173.547	-181.376
2012-11-08 02:09:39	170.47	178.11		10.4047	-173.772	-181.56
2012-11-08 02:19:39	170.65	178.42		10.4116	-173.955	-181.876
2012-11-08 02:29:39	170.85	178.64		10.4186	-174.159	-182.1	2012-11-08 02:29:39
2012-11-08 02:39:39	171.05	178.89		10.4255	-174.363	-182.355
2012-11-08 02:49:39	171.24	179.13		10.4325	-174.557	-182.599
2012-11-08 02:59:39	171.44	179.3		10.4394	-174.76	-182.773
2012-11-08 03:09:39	171.62	179.64		10.4463	-174.944	-183.119
2012-11-08 03:19:39	171.83	179.79		10.4533	-175.158	-183.272
2012-11-08 03:29:39	171.55	180.12		10.4602	-174.873	-183.609	2012-11-08 03:29:39
2012-11-08 03:39:39	172.17	180.38		10.4672	-175.505	-183.874
2012-11-08 03:49:39	172.36	180.55		10.4741	-175.698	-184.047
2012-11-08 03:59:39	172.56	180.85		10.4811	-175.902	-184.353
2012-11-08 04:09:39	172.73	181.07		10.488	-176.075	-184.577
2012-11-08 04:19:39	172.92	181.36		10.495	-176.269	-184.873
2012-11-08 04:29:39	173.09	181.59		10.5019	-176.442	-185.107	2012-11-08 04:29:39
2012-11-08 04:39:39	173.28	181.87		10.5088	-176.636	-185.392
2012-11-08 04:49:39	173.47	182.05		10.5158	-176.83	-185.576
2012-11-08 04:59:39	173.64	182.3		10.5227	-177.003	-185.831
2012-11-08 05:09:39	173.82	182.54		10.5297	-177.187	-186.075
2012-11-08 05:19:39	173.99	182.78		10.5366	-177.36	-186.32
2012-11-08 05:29:39	174.17	183		10.5436	-177.543	-186.544	2012-11-08 05:29:39
2012-11-08 05:39:39	174.34	183.24		10.5505	-177.717	-186.789
2012-11-08 05:49:39	174.51	183.45		10.5575	-177.89	-187.003
2012-11-08 05:59:39	174.68	183.7		10.5644	-178.063	-187.258
2012-11-08 06:09:39	174.83	183.96		10.5713	-178.216	-187.523
2012-11-08 06:19:39	174.99	184.19		10.5783	-178.379	-187.757
2012-11-08 06:29:39	175.17	184.41		10.5852	-178.563	-187.982	2012-11-08 06:29:39
2012-11-08 06:39:39	175.32	184.62		10.5922	-178.716	-188.196
2012-11-08 06:49:39	175.49	184.85		10.5991	-178.889	-188.43
2012-11-08 06:59:39	175.66	185.06		10.6061	-179.062	-188.644
2012-11-08 07:09:39	175.82	185.23		10.613	-179.225	-188.818
2012-11-08 07:19:39	175.97	185.43		10.62	-179.378	-189.021
2012-11-08 07:29:39	176.12	185.66		10.6269	-179.531	-189.256	2012-11-08 07:29:39
2012-11-08 07:39:39	176.26	185.87		10.6338	-179.674	-189.47
2012-11-08 07:49:39	176.43	186.04		10.6408	-179.847	-189.643
2012-11-08 07:59:39	176.56	186.28		10.6477	-179.98	-189.888
2012-11-08 08:09:39	176.7	186.46		10.6547	-180.122	-190.071
2012-11-08 08:19:39	176.86	186.63		10.6616	-180.285	-190.245
2012-11-08 08:29:39	176.97	186.74		10.6686	-180.398	-190.357	2012-11-08 08:29:39
2012-11-08 08:39:39	177.06	186.98		10.6755	-180.489	-190.601
2012-11-08 08:49:39	177.25	187.23		10.6825	-180.683	-190.856
2012-11-08 08:59:39	177.41	187.43		10.6894	-180.846	-191.06
2012-11-08 09:09:39	177.54	187.64		10.6963	-180.979	-191.274
2012-11-08 09:19:39	177.7	187.87		10.7033	-181.142	-191.509
2012-11-08 09:29:39	177.83	188.07		10.7102	-181.274	-191.713	2012-11-08 09:29:39
2012-11-08 09:39:39	177.97	188.29		10.7172	-181.417	-191.937
2012-11-08 09:49:39	178.11	188.49		10.7241	-181.56	-192.141
2012-11-08 09:59:39	178.25	188.67		10.7311	-181.702	-192.324
2012-11-08 10:09:39	178.19	188.62		10.738	-181.641	-192.273
2012-11-08 10:19:39	178.33	188.75		10.745	-181.784	-192.406
2012-11-08 10:29:39	178.45	188.97		10.7519	-181.906	-192.63	2012-11-08 10:29:39
2012-11-08 10:39:39	178.56	189.17		10.7588	-182.018	-192.834
2012-11-08 10:49:39	178.69	189.41		10.7658	-182.151	-193.078
2012-11-08 10:59:39	178.83	189.64		10.7727	-182.294	-193.313
2012-11-08 11:09:39	178.97	189.81		10.7797	-182.436	-193.486
2012-11-08 11:19:39	179.11	190.04		10.7866	-182.579	-193.721
2012-11-08 11:29:39	179.27	190.27		10.7936	-182.742	-193.955	2012-11-08 11:29:39
2012-11-08 11:39:39	179.36	190.42		10.8005	-182.834	-194.108
2012-11-08 11:49:39	179.51	190.61		10.8075	-182.987	-194.302
2012-11-08 11:59:39	179.65	190.82		10.8144	-183.129	-194.516
2012-11-08 12:09:39	179.8	191.01		10.8213	-183.282	-194.709
2012-11-08 12:19:39	179.91	191.23		10.8283	-183.394	-194.934
2012-11-08 12:29:39	180.04	191.35		10.8352	-183.527	-195.056	2012-11-08 12:29:39
2012-11-08 12:39:39	180.14	191.54		10.8422	-183.629	-195.25
2012-11-08 12:49:39	180.31	191.79		10.8491	-183.802	-195.505
2012-11-08 12:59:39	180.41	191.93		10.8561	-183.904	-195.647
2012-11-08 13:09:39	180.54	192.09		10.863	-184.037	-195.81
2012-11-08 13:19:39	180.65	192.26		10.87	-184.149	-195.984
2012-11-08 13:29:39	180.76	192.43		10.8769	-184.261	-196.157	2012-11-08 13:29:39
2012-11-08 13:39:39	180.88	192.59		10.8838	-184.383	-196.32
2012-11-08 13:49:39	181.01	192.83		10.8908	-184.516	-196.565
2012-11-08 13:59:39	181.15	193.04		10.8977	-184.659	-196.779
2012-11-08 14:09:39	181.25	193.16		10.9047	-184.76	-196.901
2012-11-08 14:19:39	181.37	193.35		10.9116	-184.883	-197.095
2012-11-08 14:29:39	181.2	192.47		10.9186	-184.709	-196.198	2012-11-08 14:29:39
2012-11-08 14:39:39	181.45	193.42		10.9255	-184.964	-197.166
2012-11-08 14:49:39	181.73	193.88		10.9325	-185.25	-197.635
2012-11-08 14:59:39	181.8	193.91		10.9394	-185.321	-197.666
2012-11-08 15:09:39	181.92	193.81		10.9463	-185.443	-197.564
2012-11-08 15:19:39	182.03	194.31		10.9533	-185.556	-198.073
2012-11-08 15:29:39	182.15	194.54		10.9602	-185.678	-198.308	2012-11-08 15:29:39
2012-11-08 15:39:39	182.27	194.79		10.9672	-185.8	-198.563
2012-11-08 15:49:39	182.35	194.98		10.9741	-185.882	-198.756
2012-11-08 15:59:39	182.51	195.12		10.9811	-186.045	-198.899
2012-11-08 16:09:39	182.59	195.25		10.988	-186.126	-199.032
2012-11-08 16:19:39	182.75	195.48		10.995	-186.29	-199.266
2012-11-08 16:29:39	182.87	195.68		11.0019	-186.412	-199.47	2012-11-08 16:29:39
2012-11-08 16:39:39	182.97	195.86		11.0088	-186.514	-199.653
2012-11-08 16:49:39	183.08	196.04		11.0158	-186.626	-199.837
2012-11-08 16:59:39	183.2	196.08		11.0227	-186.748	-199.878
2012-11-08 17:09:39	183.31	196.26		11.0297	-186.86	-200.061
2012-11-08 17:19:39	183.38	196.47		11.0366	-186.932	-200.275
2012-11-08 17:29:39	183.5	196.75		11.0436	-187.054	-200.561	2012-11-08 17:29:39
2012-11-08 17:39:39	183.6	196.82		11.0505	-187.156	-200.632
2012-11-08 17:49:39	183.7	196.91		11.0575	-187.258	-200.724
2012-11-08 17:59:39	183.78	197.03		11.0644	-187.339	-200.846
2012-11-08 18:09:39	183.87	197.22		11.0713	-187.431	-201.04
2012-11-08 18:19:39	183.97	197.39		11.0783	-187.533	-201.213
2012-11-08 18:29:39	184.05	197.48		11.0852	-187.615	-201.305	2012-11-08 18:29:39
2012-11-08 18:39:39	183.65	196.82		11.0922	-187.207	-200.632
2012-11-08 18:49:39	183.97	197.52		11.0991	-187.533	-201.346
2012-11-08 18:59:39	184.1	197.83		11.1061	-187.666	-201.662
2012-11-08 19:09:39	184.22	198.02		11.113	-187.788	-201.855
2012-11-08 19:19:39	184.35	198.31		11.12	-187.92	-202.151
2012-11-08 19:29:39	184.45	198.46		11.1269	-188.022	-202.304	2012-11-08 19:29:39
2012-11-08 19:39:39	184.58	198.79		11.1338	-188.155	-202.64
2012-11-08 19:49:39	184.73	198.99		11.1408	-188.308	-202.844
2012-11-08 19:59:39	184.81	199.06		11.1477	-188.389	-202.915
2012-11-08 20:09:39	184.94	199.4		11.1547	-188.522	-203.262
2012-11-08 20:19:39	185.07	199.59		11.1616	-188.654	-203.456
2012-11-08 20:29:39	185.21	199.81		11.1686	-188.797	-203.68	2012-11-08 20:29:39
2012-11-08 20:39:39	185.32	200.08		11.1755	-188.909	-203.955
2012-11-08 20:49:39	185.45	200.28		11.1825	-189.042	-204.159
2012-11-08 20:59:39	185.55	200.5		11.1894	-189.144	-204.383
2012-11-08 21:09:39	185.59	200.55		11.1963	-189.185	-204.434
2012-11-08 21:19:39	185.82	200.79		11.2033	-189.419	-204.679
2012-11-08 21:29:39	185.9	201.01		11.2102	-189.501	-204.903	2012-11-08 21:29:39
2012-11-08 21:39:39	186.04	201.2		11.2172	-189.643	-205.097
2012-11-08 21:49:39	186.16	201.39		11.2241	-189.766	-205.291
2012-11-08 21:59:39	186.26	201.59		11.2311	-189.867	-205.494
2012-11-08 22:09:39	186.36	201.83		11.238	-189.969	-205.739
2012-11-08 22:19:39	186.48	201.95		11.245	-190.092	-205.861
2012-11-08 22:29:39	186.58	202.13		11.2519	-190.194	-206.045	2012-11-08 22:29:39
2012-11-08 22:39:39	186.7	202.3		11.2588	-190.316	-206.218
2012-11-08 22:49:39	186.82	202.55		11.2658	-190.438	-206.473
2012-11-08 22:59:39	186.93	202.77		11.2727	-190.55	-206.697
2012-11-08 23:09:39	187.02	202.85		11.2797	-190.642	-206.779
2012-11-08 23:19:39	187.13	202.92		11.2866	-190.754	-206.85
2012-11-08 23:29:39	187.22	203.03		11.2936	-190.846	-206.962	2012-11-08 23:29:39
2012-11-08 23:39:39	187.34	203.24		11.3005	-190.968	-207.176
2012-11-08 23:49:39	187.42	203.59		11.3075	-191.05	-207.533
2012-11-08 23:59:39	187.52	203.71		11.3144	-191.152	-207.655
2012-11-09 00:09:39	187.64	203.98		11.3213	-191.274	-207.931
2012-11-09 00:19:39	187.72	204.13		11.3283	-191.356	-208.084
2012-11-09 00:29:39	187.85	204.35		11.3352	-191.488	-208.308	2012-11-09 00:29:39
2012-11-09 00:39:39	187.93	204.51		11.3422	-191.57	-208.471
2012-11-09 00:49:39	188.04	204.71		11.3491	-191.682	-208.675
2012-11-09 00:59:39	188.15	204.95		11.3561	-191.794	-208.919
2012-11-09 01:09:39	188.25	205.15		11.363	-191.896	-209.123
2012-11-09 01:19:39	188.35	205.28		11.37	-191.998	-209.256
2012-11-09 01:29:39	188.46	205.47		11.3769	-192.11	-209.45	2012-11-09 01:29:39
2012-11-09 01:39:39	188.55	205.71		11.3838	-192.202	-209.694
2012-11-09 01:49:39	188.67	205.93		11.3908	-192.324	-209.918
2012-11-09 01:59:39	188.78	206.04		11.3977	-192.436	-210.031
2012-11-09 02:09:39	188.88	206.36		11.4047	-192.538	-210.357
2012-11-09 02:19:39	189.01	206.49		11.4116	-192.671	-210.489
2012-11-09 02:29:39	189.12	206.62		11.4186	-192.783	-210.622	2012-11-09 02:29:39
2012-11-09 02:39:39	189.22	206.86		11.4255	-192.885	-210.866
2012-11-09 02:49:39	189.31	206.97		11.4325	-192.977	-210.979
2012-11-09 02:59:39	189.41	207.31		11.4394	-193.078	-211.325
2012-11-09 03:09:39	189.5	207.41		11.4463	-193.17	-211.427
2012-11-09 03:19:39	189.6	207.63		11.4533	-193.272	-211.651
2012-11-09 03:29:39	189.71	207.91		11.4602	-193.384	-211.937	2012-11-09 03:29:39
2012-11-09 03:39:39	189.82	208.06		11.4672	-193.496	-212.09
2012-11-09 03:49:39	189.93	208.27		11.4741	-193.609	-212.304
2012-11-09 03:59:39	190.01	208.5		11.4811	-193.69	-212.538
2012-11-09 04:09:39	190.12	208.62		11.488	-193.802	-212.661
2012-11-09 04:19:39	190.21	208.87		11.495	-193.894	-212.915
2012-11-09 04:29:39	190.31	209.01		11.5019	-193.996	-213.058	2012-11-09 04:29:39
2012-11-09 04:39:39	190.41	209.25		11.5088	-194.098	-213.303
2012-11-09 04:49:39	190.52	209.39		11.5158	-194.21	-213.445
2012-11-09 04:59:39	190.61	209.67		11.5227	-194.302	-213.731
2012-11-09 05:09:39	190.69	209.88		11.5297	-194.383	-213.945
2012-11-09 05:19:39	190.81	210.1		11.5366	-194.506	-214.169
2012-11-09 05:29:39	190.89	210.27		11.5436	-194.587	-214.343	2012-11-09 05:29:39
2012-11-09 05:39:39	190.99	210.5		11.5505	-194.689	-214.577
[truncated: 1,366 more rows]

## Sheet: Tensi
Zeit [d]	MP bot(2) [cm]	MP top(1) [cm]		air entry bot		AE time	AE [cm]	Type	Pos	Weight
0.00189815	0.846075	-1.66157		2012-11-18 14:39:39	8800	20.9255	-8970.44	1	2	1
0.0435648	0.326198	-2.15087
0.0852315	0.101937	-2.37513		air entry top
0.126898	-0.234455	-2.7421		Time					Pos	Weight
0.168565	-0.448522	-2.95617		2012-11-13 04:39:39	8800	15.5088	-8970.44	1	1	1
0.210231	-0.611621	-3.10907
0.251898	-0.703364	-3.21101
0.293565	-0.825688	-3.34353
0.335231	-1.03976	-3.56779
0.376898	-1.19266	-3.7105
0.418565	-1.34557	-3.8736
0.460231	-1.46789	-3.99592
0.501898	-1.54944	-4.08767
0.543565	-1.6208	-4.15902
0.585231	-1.83486	-4.3629
0.626898	-1.9368	-4.45464
0.668565	-1.84506	-4.37309
0.710231	-2.04893	-4.56677
0.751898	-2.14067	-4.65851
0.793565	-2.27319	-4.79103
0.835231	-2.32416	-4.8318
0.876898	-2.49745	-5.0051
0.918565	-2.61978	-5.12742
0.960231	-2.73191	-5.23955
1.0019	-2.81346	-5.31091
1.04356	-2.93578	-5.44343
1.08523	-2.91539	-5.42304
1.1269	-3.0683	-5.57594
1.16856	-3.13965	-5.6473
1.21023	-3.2212	-5.73904
1.2519	-3.31295	-5.82059
1.29356	-3.10907	-5.6371
1.33523	-3.09888	-5.61672
1.3769	-3.18043	-5.69827
1.41856	-3.16004	-5.73904
1.46023	-3.33333	-5.85117
1.5019	-3.3945	-5.91233
1.54356	-3.45566	-5.98369
1.58523	-3.51682	-6.03466
1.6269	-3.44546	-5.9735
1.66856	-3.20082	-5.72885
1.71023	-3.40469	-5.93272
1.7519	-3.49643	-6.01427
1.79356	-3.56779	-6.08563
1.83523	-3.60856	-6.1264
1.8769	-3.69011	-6.20795
1.91856	-3.72069	-6.23853
1.96023	-3.75127	-6.27931
2.0019	-3.80224	-6.33028
2.04356	-3.90418	-6.41182
2.08523	-3.95515	-6.47299
2.1269	-4.01631	-6.54434
2.16856	-4.09786	-6.6157
2.21023	-4.13863	-6.66667
2.2519	-4.23038	-6.75841
2.29356	-4.30173	-6.82977
2.33523	-4.37309	-6.91131
2.3769	-4.45464	-6.98267
2.41856	-4.53619	-7.06422
2.46023	-4.56677	-7.0948
2.5019	-4.62793	-7.15596
2.54356	-4.68909	-7.22732
2.58523	-4.79103	-7.29867
2.6269	-4.87258	-7.37003
2.66856	-4.95413	-7.45158
2.71023	-5.0051	-7.51274
2.7519	-5.09684	-7.59429
2.79356	-5.18858	-7.67584
2.83523	-4.62793	-7.10499
2.8769	-4.87258	-7.32926
2.91856	-5.05607	-7.51274
2.96023	-5.27013	-7.70642
3.0019	-5.39246	-7.83894
3.04356	-5.47401	-7.9103
3.08523	-5.65749	-8.09378
3.1269	-5.79001	-8.24669
3.16856	-5.91233	-8.3792
3.21023	-6.05505	-8.52192
3.2519	-6.17737	-8.65443
3.29356	-6.2895	-8.76656
3.33523	-6.41182	-8.89908
3.3769	-6.54434	-9.02141
3.41856	-6.68705	-9.18451
3.46023	-6.81957	-9.30683
3.5019	-6.9419	-9.43935
3.54356	-7.07441	-9.56167
3.58523	-7.21713	-9.71458
3.6269	-7.35984	-9.86748
3.66856	-7.47197	-9.97961
3.71023	-7.60449	-10.0815
3.7519	-7.7472	-10.2446
3.79356	-7.86952	-10.3772
3.83523	-8.04281	-10.5607
3.8769	-8.21611	-10.7238
3.91856	-8.40979	-10.9174
3.96023	-8.58308	-11.0907
4.0019	-8.76656	-11.2844
4.04356	-8.91947	-11.4475
4.08523	-9.10296	-11.6106
4.1269	-9.3578	-11.8756
4.16856	-9.61264	-12.1407
4.21023	-9.88787	-12.4159
4.2519	-10.1529	-12.6911
4.29356	-10.4179	-12.9562
4.33523	-10.6932	-13.2416
4.3769	-10.9786	-13.527
4.41856	-11.2538	-13.8124
4.46023	-11.5291	-14.0877
4.5019	-11.8043	-14.3629
4.54356	-12.0897	-14.6381
4.58523	-12.3853	-14.9439
4.6269	-12.6606	-15.2294
4.66856	-12.9052	-15.4638
4.71023	-13.16	-15.7288
4.7519	-13.4659	-16.0347
4.79356	-13.6697	-16.2385
4.83523	-13.894	-16.4526
4.8769	-14.1998	-16.7584
4.91856	-14.4546	-17.0336
4.96023	-14.6993	-17.2783
5.0019	-15.0561	-17.6249
5.04356	-15.3925	-17.9817
5.08523	-15.7492	-18.3384
5.1269	-16.1468	-18.736
5.16856	-16.4118	-19.0112
5.21023	-16.8603	-19.4597
5.2519	-17.2783	-19.8777
5.29356	-17.6758	-20.2752
5.33523	-18.0632	-20.6728
5.3769	-18.4811	-21.0907
5.41856	-18.9093	-21.5291
5.46023	-19.368	-21.9674
5.5019	-19.7859	-22.4159
5.54356	-20.2141	-22.8338
5.58523	-20.6626	-23.2824
5.6269	-21.1009	-23.7207
5.66856	-21.5392	-24.1692
5.71023	-22.0387	-24.6585
5.7519	-22.3853	-24.9847
5.79356	-22.946	-25.5454
5.83523	-23.3945	-25.9939
5.8769	-23.8532	-26.4526
5.91856	-24.3527	-26.9623
5.96023	-24.6687	-27.2783
6.0019	-25.2497	-27.8593
6.04356	-25.7288	-28.369
6.08523	-26.1774	-28.787
6.1269	-26.789	-29.3986
6.16856	-27.4108	-30.0204
6.21023	-28.0632	-30.6728
6.2519	-28.736	-31.366
6.29356	-29.4597	-32.0795
6.33523	-30.2039	-32.8236
6.3769	-30.9684	-33.5882
6.41856	-31.7329	-34.3731
6.46023	-32.528	-35.1478
6.5019	-33.3333	-35.9633
6.54356	-34.1284	-36.7482
6.58523	-34.9337	-37.5637
6.6269	-35.7798	-38.42
6.66856	-36.5545	-39.1947
6.71023	-37.3191	-39.9592
6.7519	-38.1244	-40.7441
6.79356	-38.9195	-41.5392
6.83523	-39.7655	-42.3853
6.8769	-40.5912	-43.211
6.91856	-41.4781	-44.0877
6.96023	-42.0489	-45.2803
7.0019	-43.211	-45.8104
7.04356	-44.21	-46.8298
7.08523	-45.1478	-47.7778
7.1269	-46.0856	-48.7258
7.16856	-47.3089	-49.9388
7.21023	-48.4709	-51.1009
7.2519	-49.5209	-52.1407
7.29356	-50.6626	-53.2926
7.33523	-51.8247	-54.4546
7.3769	-53.0581	-55.6983
7.41856	-54.3323	-56.9827
7.46023	-55.6677	-58.3282
7.5019	-56.9929	-59.6432
7.54356	-58.1855	-60.8563
7.58523	-59.3884	-62.0387
7.6269	-60.6422	-63.3028
7.66856	-61.8552	-64.5464
7.71023	-63.0377	-65.7288
7.7519	-64.2508	-66.9317
7.79356	-65.474	-68.1957
7.83523	-66.8196	-69.5413
7.8769	-68.2467	-70.9786
7.91856	-69.6636	-72.4159
7.96023	-71.1417	-73.8838
8.0019	-72.3955	-75.1274
8.04356	-73.894	-76.6361
8.08523	-75.3007	-78.0428
8.1269	-76.8298	-79.6024
8.16856	-78.2773	-81.0398
8.21023	-79.7452	-82.528
8.2519	-81.1723	-83.9653
8.29356	-82.6402	-85.4434
8.33523	-84.1182	-86.9113
8.3769	-85.6575	-88.4913
8.41856	-87.2171	-90.0917
8.46023	-88.8073	-91.6922
8.5019	-90.4281	-93.3129
8.54356	-92.0183	-94.9134
8.58523	-93.6595	-96.5851
8.6269	-95.2396	-98.1753
8.66856	-96.7992	-99.7757
8.71023	-98.4098	-101.386
8.7519	-100.143	-103.15
8.79356	-101.417	-104.659
8.83523	-103.425	-106.493
8.8769	-105.036	-108.135
8.91856	-106.758	-109.888
8.96023	-108.461	-111.621
9.0019	-110.245	-113.466
9.04356	-112.314	-115.617
9.08523	-114.332	-117.686
9.1269	-116.544	-119.959
9.16856	-118.848	-122.345
9.21023	-121.091	-124.536
9.2519	-123.201	-126.738
9.29356	-125.341	-128.991
9.33523	-127.666	-131.325
9.3769	-129.857	-133.537
9.41856	-132.018	-135.872
9.46023	-134.271	-138.175
9.5019	-136.524	-140.52
9.54356	-136.993	-142.895
9.58523	-140.979	-145.168
9.6269	-143.201	-147.462
9.66856	-145.097	-149.388
9.71023	-146.871	-151.407
9.7519	-148.736	-153.344
9.79356	-150.51	-155.229
9.83523	-152.253	-157.125
9.8769	-154.077	-159.042
9.91856	-155.821	-160.877
9.96023	-157.564	-162.783
10.0019	-159.225	-164.628
10.0436	-160.54	-166.351
10.0852	-162.355	-168.226
10.1269	-164.057	-170.183
10.1686	-165.515	-172.018
10.2102	-167.278	-173.792
10.2519	-168.746	-175.566
10.2936	-170.367	-177.421
10.3352	-171.682	-179.011
10.3769	-172.956	-180.571
10.4186	-174.159	-182.1
10.4602	-174.873	-183.609
10.5019	-176.442	-185.107
10.5436	-177.543	-186.544
10.5852	-178.563	-187.982
10.6269	-179.531	-189.256
10.6686	-180.398	-190.357
10.7102	-181.274	-191.713
10.7519	-181.906	-192.63
10.7936	-182.742	-193.955
10.8352	-183.527	-195.056
10.8769	-184.261	-196.157
10.9186	-184.709	-196.198
10.9602	-185.678	-198.308
11.0019	-186.412	-199.47
11.0436	-187.054	-200.561
11.0852	-187.615	-201.305
11.1269	-188.022	-202.304
11.1686	-188.797	-203.68
11.2102	-189.501	-204.903
11.2519	-190.194	-206.045
11.2936	-190.846	-206.962
11.3352	-191.488	-208.308
11.3769	-192.11	-209.45
11.4186	-192.783	-210.622
11.4602	-193.384	-211.937
11.5019	-193.996	-213.058
11.5436	-194.587	-214.343
11.5852	-195.178	-215.586
11.6269	-195.759	-216.809
11.6755	-195.392	-216.504
11.7172	-196.718	-218.797
11.7588	-197.288	-220.071
11.8005	-197.87	-221.478
11.8422	-198.43	-222.966
11.8838	-198.991	-224.363
11.9255	-199.307	-225.311
11.9672	-199.98	-227.717
12.0088	-200.693	-229.745
12.0505	-201.325	-231.325
12.0922	-201.957	-233.099
12.1338	-202.599	-234.944
12.1755	-203.16	-236.595
12.2172	-203.823	-238.603
12.2588	-204.465	-241.121
12.3005	-205.117	-243.751
12.3422	-205.77	-246.371
12.3838	-206.453	-249.327
12.4255	-207.074	-252.253
12.4672	-207.727	-255.454
12.5088	-208.369	-258.726
12.5505	-209.001	-262.528
12.5922	-209.623	-265.005
12.6338	-210.296	-268.084
12.6755	-210.968	-271.814
12.7172	-211.611	-275.851
12.7588	-212.008	-278.838
12.8005	-212.742	-283.772
12.8422	-213.425	-288.93
12.8838	-214.077	-294.516
12.9255	-214.771	-299.562
12.9672	-214.832	-301.876
13.0088	-215.923	-310.836
13.0505	-216.891	-319.052
13.0922	-217.757	-326.534
13.1338	-218.573	-335.127
13.1755	-219.409	-343.935
13.2172	-220.275	-354.037
13.2588	-220.999	-364.302
13.3005	-221.825	-375.943
13.3422	-222.61	-386.626
13.3838	-223.456	-401.07
13.4255	-224.251	-415.372
13.4672	-225.046	-432.508
13.5088	-225.912	-452.192
13.5505	-226.758	-473.099
13.5922	-227.584	-494.322
13.6338	-228.43	-521.162
13.6755	-229.307	-551.702
13.7172	-230.082	-583.66
13.7588	-230.938	-629.806
13.8005	-231.825	-680.917
13.8422	-232.783	-739.052
13.8838	-233.7	-816.534
13.9255	-234.648	-893.445
13.9672	-233.741	-975.056
14.0088	-236.758	-1123.63
14.0366	-237.625	-1234.66
14.0922	-237.564
14.1338	-240.489
14.1755	-241.855
14.2172	-243.17
14.2588	-244.414
14.3005	-245.657
14.3422	-246.932
14.3838	-248.308
14.4255	-249.715
14.4672	-251.07
14.5088	-252.436
14.5505	-253.731
14.5922	-255.117
14.6338	-256.453
14.6755	-257.829
14.7172	-259.113
14.7588	-260.387
14.8005	-262.243
14.8422	-261.641
14.8838	-266.493
14.9255	-268.644
14.9672	-270.917
15.0088	-272.987
15.0505	-275.178
15.0922	-277.401
15.1338	-279.776
15.1755	-282.069
15.2172	-284.159
15.2588	-286.473
15.3005	-288.767
15.3422	-291.264
15.3838	-293.823
15.4255	-296.453
15.4672	-299.266
15.5088	-301.988
15.5505	-304.74
15.5922	-307.686
15.6338	-310.703
15.6755	-313.242
15.7172	-315.209
15.7588	-318.379
15.8005	-321.427
15.8422	-324.659
15.8838	-328.267
15.9255	-332.1
15.9672	-335.821
16.0088	-339.837
16.0505	-344.241
16.0922	-348.95
16.1338	-353.721
16.1755	-358.97
16.2172	-364.852
16.2588	-371.05
16.3005	-377.401
16.3422	-383.598
16.3838	-389.908
16.4255	-395.973
16.4672	-403.537
16.5088	-411.397
16.5505	-420.224
16.5922	-429.572
16.6338	-439.072
16.6755	-446.789
16.7172	-452.987
16.7588	-461.988
16.8005	-476.096
16.8422	-490.836
16.8838	-504.73
16.9255	-517.727
16.9672	-529.49
17.0088	-549.083
17.0505	-569.419
17.0922	-589.256
17.1338	-615.892
17.1755	-641.774
17.2172	-671.651
17.2588	-704.363
17.3005	-737.655
17.3422	-773.15
17.3838	-813.374
17.4255	-858.909
17.4741	-916.249

## Sheet: HYDRUS
Data für die Zielfunktion: 2 x Tensionen, 1 x Endwassergehalt						Verdunstungsrate
Time	Obs	Type	Pos	Weight		Zeitintervall		Evarate [cm/d]			Type	1-Tension	2-Wassergehalt
0.00189815	0.846075	1	2	1		0.639086	0	0.401941			Pos	1-top	2-bot	(von oben nach unten)
0.0435648	0.326198	1	2	1		1.05808	0	0.403249			29	Time-Variable boundary conditions+
0.0852315	0.101937	1	2	1		1.64544	0	0.332703			17.4741	Final Time	Time Information
0.126898	-0.234455	1	2	1		2.17314	0	0.310706			760	Number of Data Points in Objective Function
0.168565	-0.448522	1	2	1		2.67944	0	0.311899		Interpolated Values	-5.19535	BC-top	[hPa]
0.210231	-0.611621	1	2	1		2.80468	0	0.319409			-3.94535	MP_top_ini	[hPa]	1
0.251898	-0.703364	1	2	1		3.02633	0	0.317686			-0.940528	MP_bot_ini	[hPa]	2
0.293565	-0.825688	1	2	1		3.64867	0	0.324716			0.309472	BC-bot	[hPa]
0.335231	-1.03976	1	2	1		4.02789	0	0.333466
0.376898	-1.19266	1	2	1		4.76888	0	0.377033
0.418565	-1.34557	1	2	1		5.15602	0	0.349248
0.460231	-1.46789	1	2	1		5.74868	0	0.378588		Real Values	-2.81983	BC-top	[cm]
0.501898	-1.54944	1	2	1		6.08396	0	0.333057			-1.56983	MP_top_ini	[cm]
0.543565	-1.6208	1	2	1		6.78727	0	0.342132			0.937819	MP_bot_ini	[cm]
0.585231	-1.83486	1	2	1		7.12644	0	0.309582			2.18782	BC-bot	[cm]
0.626898	-1.9368	1	2	1		7.77863	0	0.309849
0.668565	-1.84506	1	2	1		8.15288	0	0.303386
0.710231	-2.04893	1	2	1		8.79296	0	0.289677
0.751898	-2.14067	1	2	1		9.18627	0	0.298217
0.793565	-2.27319	1	2	1		9.73321	0	0.277685
0.835231	-2.32416	1	2	1		10.1016	0	0.247675
0.876898	-2.49745	1	2	1		10.7342	0	0.270397
0.918565	-2.61978	1	2	1		11.0874	0	0.241824
0.960231	-2.73191	1	2	1		11.6689	0	0.20387
1.0019	-2.81346	1	2	1		13.2376	0	0.147275
1.04356	-2.93578	1	2	1		13.8882	0	0.104724
1.08523	-2.91539	1	2	1		14.0847	0	0.102833
1.1269	-3.0683	1	2	1		14.7266	0	0.0963938
1.16856	-3.13965	1	2	1		17.4741	0	0.0847318
1.21023	-3.2212	1	2	1
1.2519	-3.31295	1	2	1
1.29356	-3.10907	1	2	1
1.33523	-3.09888	1	2	1
1.3769	-3.18043	1	2	1
1.41856	-3.16004	1	2	1
1.46023	-3.33333	1	2	1
1.5019	-3.3945	1	2	1
1.54356	-3.45566	1	2	1
1.58523	-3.51682	1	2	1
1.6269	-3.44546	1	2	1
1.66856	-3.20082	1	2	1
1.71023	-3.40469	1	2	1
1.7519	-3.49643	1	2	1
1.79356	-3.56779	1	2	1
1.83523	-3.60856	1	2	1
1.8769	-3.69011	1	2	1
1.91856	-3.72069	1	2	1
1.96023	-3.75127	1	2	1
2.0019	-3.80224	1	2	1
2.04356	-3.90418	1	2	1
2.08523	-3.95515	1	2	1
2.1269	-4.01631	1	2	1
2.16856	-4.09786	1	2	1
2.21023	-4.13863	1	2	1
2.2519	-4.23038	1	2	1
2.29356	-4.30173	1	2	1
2.33523	-4.37309	1	2	1
2.3769	-4.45464	1	2	1
2.41856	-4.53619	1	2	1
2.46023	-4.56677	1	2	1
2.5019	-4.62793	1	2	1
2.54356	-4.68909	1	2	1
2.58523	-4.79103	1	2	1
2.6269	-4.87258	1	2	1
2.66856	-4.95413	1	2	1
2.71023	-5.0051	1	2	1
2.7519	-5.09684	1	2	1
2.79356	-5.18858	1	2	1
2.83523	-4.62793	1	2	1
2.8769	-4.87258	1	2	1
2.91856	-5.05607	1	2	1
2.96023	-5.27013	1	2	1
3.0019	-5.39246	1	2	1
3.04356	-5.47401	1	2	1
3.08523	-5.65749	1	2	1
3.1269	-5.79001	1	2	1
3.16856	-5.91233	1	2	1
3.21023	-6.05505	1	2	1
3.2519	-6.17737	1	2	1
3.29356	-6.2895	1	2	1
3.33523	-6.41182	1	2	1
3.3769	-6.54434	1	2	1
3.41856	-6.68705	1	2	1
3.46023	-6.81957	1	2	1
3.5019	-6.9419	1	2	1
3.54356	-7.07441	1	2	1
3.58523	-7.21713	1	2	1
3.6269	-7.35984	1	2	1
3.66856	-7.47197	1	2	1
3.71023	-7.60449	1	2	1
3.7519	-7.7472	1	2	1
3.79356	-7.86952	1	2	1
3.83523	-8.04281	1	2	1
3.8769	-8.21611	1	2	1
3.91856	-8.40979	1	2	1
3.96023	-8.58308	1	2	1
4.0019	-8.76656	1	2	1
4.04356	-8.91947	1	2	1
4.08523	-9.10296	1	2	1
4.1269	-9.3578	1	2	1
4.16856	-9.61264	1	2	1
4.21023	-9.88787	1	2	1
4.2519	-10.1529	1	2	1
4.29356	-10.4179	1	2	1
4.33523	-10.6932	1	2	1
4.3769	-10.9786	1	2	1
4.41856	-11.2538	1	2	1
4.46023	-11.5291	1	2	1
4.5019	-11.8043	1	2	1
4.54356	-12.0897	1	2	1
4.58523	-12.3853	1	2	1
4.6269	-12.6606	1	2	1
4.66856	-12.9052	1	2	1
4.71023	-13.16	1	2	1
4.7519	-13.4659	1	2	1
4.79356	-13.6697	1	2	1
4.83523	-13.894	1	2	1
4.8769	-14.1998	1	2	1
4.91856	-14.4546	1	2	1
4.96023	-14.6993	1	2	1
5.0019	-15.0561	1	2	1
5.04356	-15.3925	1	2	1
5.08523	-15.7492	1	2	1
5.1269	-16.1468	1	2	1
5.16856	-16.4118	1	2	1
5.21023	-16.8603	1	2	1
5.2519	-17.2783	1	2	1
5.29356	-17.6758	1	2	1
5.33523	-18.0632	1	2	1
5.3769	-18.4811	1	2	1
5.41856	-18.9093	1	2	1
5.46023	-19.368	1	2	1
5.5019	-19.7859	1	2	1
5.54356	-20.2141	1	2	1
5.58523	-20.6626	1	2	1
5.6269	-21.1009	1	2	1
5.66856	-21.5392	1	2	1
5.71023	-22.0387	1	2	1
5.7519	-22.3853	1	2	1
5.79356	-22.946	1	2	1
5.83523	-23.3945	1	2	1
5.8769	-23.8532	1	2	1
5.91856	-24.3527	1	2	1
5.96023	-24.6687	1	2	1
6.0019	-25.2497	1	2	1
6.04356	-25.7288	1	2	1
6.08523	-26.1774	1	2	1
6.1269	-26.789	1	2	1
6.16856	-27.4108	1	2	1
6.21023	-28.0632	1	2	1
6.2519	-28.736	1	2	1
6.29356	-29.4597	1	2	1
6.33523	-30.2039	1	2	1
6.3769	-30.9684	1	2	1
6.41856	-31.7329	1	2	1
6.46023	-32.528	1	2	1
6.5019	-33.3333	1	2	1
6.54356	-34.1284	1	2	1
6.58523	-34.9337	1	2	1
6.6269	-35.7798	1	2	1
6.66856	-36.5545	1	2	1
6.71023	-37.3191	1	2	1
6.7519	-38.1244	1	2	1
6.79356	-38.9195	1	2	1
6.83523	-39.7655	1	2	1
6.8769	-40.5912	1	2	1
6.91856	-41.4781	1	2	1
6.96023	-42.0489	1	2	1
7.0019	-43.211	1	2	1
7.04356	-44.21	1	2	1
7.08523	-45.1478	1	2	1
7.1269	-46.0856	1	2	1
7.16856	-47.3089	1	2	1
7.21023	-48.4709	1	2	1
7.2519	-49.5209	1	2	1
7.29356	-50.6626	1	2	1
7.33523	-51.8247	1	2	1
7.3769	-53.0581	1	2	1
7.41856	-54.3323	1	2	1
7.46023	-55.6677	1	2	1
7.5019	-56.9929	1	2	1
7.54356	-58.1855	1	2	1
7.58523	-59.3884	1	2	1
7.6269	-60.6422	1	2	1
7.66856	-61.8552	1	2	1
7.71023	-63.0377	1	2	1
7.7519	-64.2508	1	2	1
7.79356	-65.474	1	2	1
7.83523	-66.8196	1	2	1
7.8769	-68.2467	1	2	1
7.91856	-69.6636	1	2	1
7.96023	-71.1417	1	2	1
8.0019	-72.3955	1	2	1
8.04356	-73.894	1	2	1
8.08523	-75.3007	1	2	1
8.1269	-76.8298	1	2	1
8.16856	-78.2773	1	2	1
8.21023	-79.7452	1	2	1
8.2519	-81.1723	1	2	1
8.29356	-82.6402	1	2	1
8.33523	-84.1182	1	2	1
8.3769	-85.6575	1	2	1
8.41856	-87.2171	1	2	1
8.46023	-88.8073	1	2	1
8.5019	-90.4281	1	2	1
8.54356	-92.0183	1	2	1
8.58523	-93.6595	1	2	1
8.6269	-95.2396	1	2	1
8.66856	-96.7992	1	2	1
8.71023	-98.4098	1	2	1
8.7519	-100.143	1	2	1
8.79356	-101.417	1	2	1
8.83523	-103.425	1	2	1
8.8769	-105.036	1	2	1
8.91856	-106.758	1	2	1
8.96023	-108.461	1	2	1
9.0019	-110.245	1	2	1
9.04356	-112.314	1	2	1
9.08523	-114.332	1	2	1
9.1269	-116.544	1	2	1
9.16856	-118.848	1	2	1
9.21023	-121.091	1	2	1
9.2519	-123.201	1	2	1
9.29356	-125.341	1	2	1
9.33523	-127.666	1	2	1
9.3769	-129.857	1	2	1
9.41856	-132.018	1	2	1
9.46023	-134.271	1	2	1
9.5019	-136.524	1	2	1
9.54356	-136.993	1	2	1
9.58523	-140.979	1	2	1
9.6269	-143.201	1	2	1
9.66856	-145.097	1	2	1
9.71023	-146.871	1	2	1
9.7519	-148.736	1	2	1
9.79356	-150.51	1	2	1
9.83523	-152.253	1	2	1
9.8769	-154.077	1	2	1
9.91856	-155.821	1	2	1
9.96023	-157.564	1	2	1
10.0019	-159.225	1	2	1
10.0436	-160.54	1	2	1
10.0852	-162.355	1	2	1
10.1269	-164.057	1	2	1
10.1686	-165.515	1	2	1
10.2102	-167.278	1	2	1
10.2519	-168.746	1	2	1
10.2936	-170.367	1	2	1
10.3352	-171.682	1	2	1
10.3769	-172.956	1	2	1
10.4186	-174.159	1	2	1
10.4602	-174.873	1	2	1
10.5019	-176.442	1	2	1
10.5436	-177.543	1	2	1
10.5852	-178.563	1	2	1
10.6269	-179.531	1	2	1
10.6686	-180.398	1	2	1
10.7102	-181.274	1	2	1
10.7519	-181.906	1	2	1
10.7936	-182.742	1	2	1
10.8352	-183.527	1	2	1
10.8769	-184.261	1	2	1
10.9186	-184.709	1	2	1
10.9602	-185.678	1	2	1
11.0019	-186.412	1	2	1
11.0436	-187.054	1	2	1
11.0852	-187.615	1	2	1
11.1269	-188.022	1	2	1
11.1686	-188.797	1	2	1
11.2102	-189.501	1	2	1
11.2519	-190.194	1	2	1
11.2936	-190.846	1	2	1
11.3352	-191.488	1	2	1
11.3769	-192.11	1	2	1
11.4186	-192.783	1	2	1
11.4602	-193.384	1	2	1
11.5019	-193.996	1	2	1
11.5436	-194.587	1	2	1
11.5852	-195.178	1	2	1
11.6269	-195.759	1	2	1
11.6755	-195.392	1	2	1
11.7172	-196.718	1	2	1
11.7588	-197.288	1	2	1
11.8005	-197.87	1	2	1
11.8422	-198.43	1	2	1
11.8838	-198.991	1	2	1
11.9255	-199.307	1	2	1
11.9672	-199.98	1	2	1
12.0088	-200.693	1	2	1
12.0505	-201.325	1	2	1
12.0922	-201.957	1	2	1
12.1338	-202.599	1	2	1
12.1755	-203.16	1	2	1
12.2172	-203.823	1	2	1
12.2588	-204.465	1	2	1
12.3005	-205.117	1	2	1
12.3422	-205.77	1	2	1
12.3838	-206.453	1	2	1
12.4255	-207.074	1	2	1
12.4672	-207.727	1	2	1
12.5088	-208.369	1	2	1
12.5505	-209.001	1	2	1
12.5922	-209.623	1	2	1
12.6338	-210.296	1	2	1
12.6755	-210.968	1	2	1
12.7172	-211.611	1	2	1
12.7588	-212.008	1	2	1
12.8005	-212.742	1	2	1
12.8422	-213.425	1	2	1
12.8838	-214.077	1	2	1
12.9255	-214.771	1	2	1
12.9672	-214.832	1	2	1
13.0088	-215.923	1	2	1
13.0505	-216.891	1	2	1
13.0922	-217.757	1	2	1
13.1338	-218.573	1	2	1
13.1755	-219.409	1	2	1
13.2172	-220.275	1	2	1
13.2588	-220.999	1	2	1
13.3005	-221.825	1	2	1
13.3422	-222.61	1	2	1
13.3838	-223.456	1	2	1
13.4255	-224.251	1	2	1
13.4672	-225.046	1	2	1
13.5088	-225.912	1	2	1
13.5505	-226.758	1	2	1
13.5922	-227.584	1	2	1
13.6338	-228.43	1	2	1
13.6755	-229.307	1	2	1
13.7172	-230.082	1	2	1
13.7588	-230.938	1	2	1
13.8005	-231.825	1	2	1
13.8422	-232.783	1	2	1
13.8838	-233.7	1	2	1
13.9255	-234.648	1	2	1
13.9672	-233.741	1	2	1
14.0088	-236.758	1	2	1
14.0366	-237.625	1	2	1
14.0922	-237.564	1	2	1
14.1338	-240.489	1	2	1
14.1755	-241.855	1	2	1
14.2172	-243.17	1	2	1
14.2588	-244.414	1	2	1
14.3005	-245.657	1	2	1
14.3422	-246.932	1	2	1
14.3838	-248.308	1	2	1
14.4255	-249.715	1	2	1
14.4672	-251.07	1	2	1
14.5088	-252.436	1	2	1
14.5505	-253.731	1	2	1
14.5922	-255.117	1	2	1
14.6338	-256.453	1	2	1
14.6755	-257.829	1	2	1
14.7172	-259.113	1	2	1
14.7588	-260.387	1	2	1
14.8005	-262.243	1	2	1
14.8422	-261.641	1	2	1
14.8838	-266.493	1	2	1
14.9255	-268.644	1	2	1
14.9672	-270.917	1	2	1
15.0088	-272.987	1	2	1
15.0505	-275.178	1	2	1
15.0922	-277.401	1	2	1
15.1338	-279.776	1	2	1
15.1755	-282.069	1	2	1
15.2172	-284.159	1	2	1
15.2588	-286.473	1	2	1
15.3005	-288.767	1	2	1
15.3422	-291.264	1	2	1
15.3838	-293.823	1	2	1
15.4255	-296.453	1	2	1
15.4672	-299.266	1	2	1
15.5088	-301.988	1	2	1
15.5505	-304.74	1	2	1
15.5922	-307.686	1	2	1
15.6338	-310.703	1	2	1
15.6755	-313.242	1	2	1
15.7172	-315.209	1	2	1
15.7588	-318.379	1	2	1
15.8005	-321.427	1	2	1
15.8422	-324.659	1	2	1
15.8838	-328.267	1	2	1
15.9255	-332.1	1	2	1
15.9672	-335.821	1	2	1
16.0088	-339.837	1	2	1
16.0505	-344.241	1	2	1
16.0922	-348.95	1	2	1
16.1338	-353.721	1	2	1
16.1755	-358.97	1	2	1
16.2172	-364.852	1	2	1
16.2588	-371.05	1	2	1
16.3005	-377.401	1	2	1
16.3422	-383.598	1	2	1
16.3838	-389.908	1	2	1
16.4255	-395.973	1	2	1
16.4672	-403.537	1	2	1
16.5088	-411.397	1	2	1
16.5505	-420.224	1	2	1
16.5922	-429.572	1	2	1
16.6338	-439.072	1	2	1
16.6755	-446.789	1	2	1
16.7172	-452.987	1	2	1
16.7588	-461.988	1	2	1
16.8005	-476.096	1	2	1
16.8422	-490.836	1	2	1
16.8838	-504.73	1	2	1
16.9255	-517.727	1	2	1
16.9672	-529.49	1	2	1
17.0088	-549.083	1	2	1
17.0505	-569.419	1	2	1
17.0922	-589.256	1	2	1
17.1338	-615.892	1	2	1
17.1755	-641.774	1	2	1
17.2172	-671.651	1	2	1
17.2588	-704.363	1	2	1
17.3005	-737.655	1	2	1
17.3422	-773.15	1	2	1
17.3838	-813.374	1	2	1
17.4255	-858.909	1	2	1
17.4741	-916.249	1	2	1
0.00189815	-1.66157	1	1	1
0.0435648	-2.15087	1	1	1
0.0852315	-2.37513	1	1	1
0.126898	-2.7421	1	1	1
0.168565	-2.95617	1	1	1
0.210231	-3.10907	1	1	1
0.251898	-3.21101	1	1	1
0.293565	-3.34353	1	1	1
0.335231	-3.56779	1	1	1
0.376898	-3.7105	1	1	1
0.418565	-3.8736	1	1	1
0.460231	-3.99592	1	1	1
0.501898	-4.08767	1	1	1
0.543565	-4.15902	1	1	1
0.585231	-4.3629	1	1	1
0.626898	-4.45464	1	1	1
0.668565	-4.37309	1	1	1
0.710231	-4.56677	1	1	1
0.751898	-4.65851	1	1	1
0.793565	-4.79103	1	1	1
0.835231	-4.8318	1	1	1
0.876898	-5.0051	1	1	1
0.918565	-5.12742	1	1	1
0.960231	-5.23955	1	1	1
1.0019	-5.31091	1	1	1
1.04356	-5.44343	1	1	1
1.08523	-5.42304	1	1	1
1.1269	-5.57594	1	1	1
1.16856	-5.6473	1	1	1
1.21023	-5.73904	1	1	1
1.2519	-5.82059	1	1	1
1.29356	-5.6371	1	1	1
1.33523	-5.61672	1	1	1
1.3769	-5.69827	1	1	1
1.41856	-5.73904	1	1	1
1.46023	-5.85117	1	1	1
1.5019	-5.91233	1	1	1
1.54356	-5.98369	1	1	1
1.58523	-6.03466	1	1	1
1.6269	-5.9735	1	1	1
1.66856	-5.72885	1	1	1
1.71023	-5.93272	1	1	1
1.7519	-6.01427	1	1	1
1.79356	-6.08563	1	1	1
1.83523	-6.1264	1	1	1
1.8769	-6.20795	1	1	1
1.91856	-6.23853	1	1	1
1.96023	-6.27931	1	1	1
2.0019	-6.33028	1	1	1
2.04356	-6.41182	1	1	1
2.08523	-6.47299	1	1	1
2.1269	-6.54434	1	1	1
2.16856	-6.6157	1	1	1
2.21023	-6.66667	1	1	1
2.2519	-6.75841	1	1	1
2.29356	-6.82977	1	1	1
2.33523	-6.91131	1	1	1
2.3769	-6.98267	1	1	1
2.41856	-7.06422	1	1	1
2.46023	-7.0948	1	1	1
2.5019	-7.15596	1	1	1
2.54356	-7.22732	1	1	1
2.58523	-7.29867	1	1	1
2.6269	-7.37003	1	1	1
2.66856	-7.45158	1	1	1
2.71023	-7.51274	1	1	1
2.7519	-7.59429	1	1	1
2.79356	-7.67584	1	1	1
2.83523	-7.10499	1	1	1
2.8769	-7.32926	1	1	1
2.91856	-7.51274	1	1	1
2.96023	-7.70642	1	1	1
3.0019	-7.83894	1	1	1
3.04356	-7.9103	1	1	1
3.08523	-8.09378	1	1	1
3.1269	-8.24669	1	1	1
3.16856	-8.3792	1	1	1
3.21023	-8.52192	1	1	1
3.2519	-8.65443	1	1	1
3.29356	-8.76656	1	1	1
3.33523	-8.89908	1	1	1
3.3769	-9.02141	1	1	1
3.41856	-9.18451	1	1	1
3.46023	-9.30683	1	1	1
3.5019	-9.43935	1	1	1
3.54356	-9.56167	1	1	1
3.58523	-9.71458	1	1	1
3.6269	-9.86748	1	1	1
3.66856	-9.97961	1	1	1
3.71023	-10.0815	1	1	1
3.7519	-10.2446	1	1	1
3.79356	-10.3772	1	1	1
3.83523	-10.5607	1	1	1
3.8769	-10.7238	1	1	1
3.91856	-10.9174	1	1	1
3.96023	-11.0907	1	1	1
4.0019	-11.2844	1	1	1
4.04356	-11.4475	1	1	1
4.08523	-11.6106	1	1	1
4.1269	-11.8756	1	1	1
4.16856	-12.1407	1	1	1
4.21023	-12.4159	1	1	1
4.2519	-12.6911	1	1	1
4.29356	-12.9562	1	1	1
4.33523	-13.2416	1	1	1
4.3769	-13.527	1	1	1
4.41856	-13.8124	1	1	1
4.46023	-14.0877	1	1	1
4.5019	-14.3629	1	1	1
4.54356	-14.6381	1	1	1
4.58523	-14.9439	1	1	1
4.6269	-15.2294	1	1	1
4.66856	-15.4638	1	1	1
4.71023	-15.7288	1	1	1
4.7519	-16.0347	1	1	1
4.79356	-16.2385	1	1	1
4.83523	-16.4526	1	1	1
4.8769	-16.7584	1	1	1
4.91856	-17.0336	1	1	1
4.96023	-17.2783	1	1	1
5.0019	-17.6249	1	1	1
5.04356	-17.9817	1	1	1
5.08523	-18.3384	1	1	1
5.1269	-18.736	1	1	1
5.16856	-19.0112	1	1	1
5.21023	-19.4597	1	1	1
5.2519	-19.8777	1	1	1
5.29356	-20.2752	1	1	1
5.33523	-20.6728	1	1	1
5.3769	-21.0907	1	1	1
5.41856	-21.5291	1	1	1
5.46023	-21.9674	1	1	1
5.5019	-22.4159	1	1	1
5.54356	-22.8338	1	1	1
5.58523	-23.2824	1	1	1
5.6269	-23.7207	1	1	1
5.66856	-24.1692	1	1	1
5.71023	-24.6585	1	1	1
5.7519	-24.9847	1	1	1
5.79356	-25.5454	1	1	1
5.83523	-25.9939	1	1	1
5.8769	-26.4526	1	1	1
5.91856	-26.9623	1	1	1
5.96023	-27.2783	1	1	1
6.0019	-27.8593	1	1	1
6.04356	-28.369	1	1	1
6.08523	-28.787	1	1	1
6.1269	-29.3986	1	1	1
6.16856	-30.0204	1	1	1
6.21023	-30.6728	1	1	1
6.2519	-31.366	1	1	1
6.29356	-32.0795	1	1	1
6.33523	-32.8236	1	1	1
6.3769	-33.5882	1	1	1
6.41856	-34.3731	1	1	1
6.46023	-35.1478	1	1	1
6.5019	-35.9633	1	1	1
6.54356	-36.7482	1	1	1
6.58523	-37.5637	1	1	1
6.6269	-38.42	1	1	1
6.66856	-39.1947	1	1	1
6.71023	-39.9592	1	1	1
6.7519	-40.7441	1	1	1
6.79356	-41.5392	1	1	1
6.83523	-42.3853	1	1	1
6.8769	-43.211	1	1	1
6.91856	-44.0877	1	1	1
6.96023	-45.2803	1	1	1
7.0019	-45.8104	1	1	1
7.04356	-46.8298	1	1	1
7.08523	-47.7778	1	1	1
7.1269	-48.7258	1	1	1
7.16856	-49.9388	1	1	1
7.21023	-51.1009	1	1	1
7.2519	-52.1407	1	1	1
7.29356	-53.2926	1	1	1
7.33523	-54.4546	1	1	1
7.3769	-55.6983	1	1	1
7.41856	-56.9827	1	1	1
7.46023	-58.3282	1	1	1
7.5019	-59.6432	1	1	1
7.54356	-60.8563	1	1	1
7.58523	-62.0387	1	1	1
7.6269	-63.3028	1	1	1
7.66856	-64.5464	1	1	1
7.71023	-65.7288	1	1	1
7.7519	-66.9317	1	1	1
7.79356	-68.1957	1	1	1
7.83523	-69.5413	1	1	1
7.8769	-70.9786	1	1	1
7.91856	-72.4159	1	1	1
7.96023	-73.8838	1	1	1
8.0019	-75.1274	1	1	1
8.04356	-76.6361	1	1	1
8.08523	-78.0428	1	1	1
8.1269	-79.6024	1	1	1
8.16856	-81.0398	1	1	1
8.21023	-82.528	1	1	1
8.2519	-83.9653	1	1	1
8.29356	-85.4434	1	1	1
8.33523	-86.9113	1	1	1
8.3769	-88.4913	1	1	1
8.41856	-90.0917	1	1	1
8.46023	-91.6922	1	1	1
8.5019	-93.3129	1	1	1
8.54356	-94.9134	1	1	1
8.58523	-96.5851	1	1	1
8.6269	-98.1753	1	1	1
8.66856	-99.7757	1	1	1
8.71023	-101.386	1	1	1
8.7519	-103.15	1	1	1
8.79356	-104.659	1	1	1
8.83523	-106.493	1	1	1
8.8769	-108.135	1	1	1
8.91856	-109.888	1	1	1
8.96023	-111.621	1	1	1
9.0019	-113.466	1	1	1
9.04356	-115.617	1	1	1
9.08523	-117.686	1	1	1
9.1269	-119.959	1	1	1
9.16856	-122.345	1	1	1
9.21023	-124.536	1	1	1
9.2519	-126.738	1	1	1
9.29356	-128.991	1	1	1
9.33523	-131.325	1	1	1
9.3769	-133.537	1	1	1
9.41856	-135.872	1	1	1
9.46023	-138.175	1	1	1
9.5019	-140.52	1	1	1
9.54356	-142.895	1	1	1
9.58523	-145.168	1	1	1
9.6269	-147.462	1	1	1
9.66856	-149.388	1	1	1
9.71023	-151.407	1	1	1
9.7519	-153.344	1	1	1
9.79356	-155.229	1	1	1
9.83523	-157.125	1	1	1
9.8769	-159.042	1	1	1
9.91856	-160.877	1	1	1
9.96023	-162.783	1	1	1
10.0019	-164.628	1	1	1
10.0436	-166.351	1	1	1
10.0852	-168.226	1	1	1
10.1269	-170.183	1	1	1
10.1686	-172.018	1	1	1
10.2102	-173.792	1	1	1
10.2519	-175.566	1	1	1
10.2936	-177.421	1	1	1
10.3352	-179.011	1	1	1
10.3769	-180.571	1	1	1
10.4186	-182.1	1	1	1
10.4602	-183.609	1	1	1
10.5019	-185.107	1	1	1
10.5436	-186.544	1	1	1
10.5852	-187.982	1	1	1
10.6269	-189.256	1	1	1
10.6686	-190.357	1	1	1
10.7102	-191.713	1	1	1
10.7519	-192.63	1	1	1
10.7936	-193.955	1	1	1
10.8352	-195.056	1	1	1
10.8769	-196.157	1	1	1
10.9186	-196.198	1	1	1
10.9602	-198.308	1	1	1
11.0019	-199.47	1	1	1
11.0436	-200.561	1	1	1
11.0852	-201.305	1	1	1
11.1269	-202.304	1	1	1
11.1686	-203.68	1	1	1
11.2102	-204.903	1	1	1
11.2519	-206.045	1	1	1
11.2936	-206.962	1	1	1
11.3352	-208.308	1	1	1
11.3769	-209.45	1	1	1
11.4186	-210.622	1	1	1
11.4602	-211.937	1	1	1
11.5019	-213.058	1	1	1
11.5436	-214.343	1	1	1
11.5852	-215.586	1	1	1
11.6269	-216.809	1	1	1
11.6755	-216.504	1	1	1
11.7172	-218.797	1	1	1
11.7588	-220.071	1	1	1
11.8005	-221.478	1	1	1
11.8422	-222.966	1	1	1
11.8838	-224.363	1	1	1
11.9255	-225.311	1	1	1
11.9672	-227.717	1	1	1
12.0088	-229.745	1	1	1
12.0505	-231.325	1	1	1
12.0922	-233.099	1	1	1
12.1338	-234.944	1	1	1
12.1755	-236.595	1	1	1
12.2172	-238.603	1	1	1
12.2588	-241.121	1	1	1
12.3005	-243.751	1	1	1
12.3422	-246.371	1	1	1
12.3838	-249.327	1	1	1
12.4255	-252.253	1	1	1
12.4672	-255.454	1	1	1
12.5088	-258.726	1	1	1
12.5505	-262.528	1	1	1
12.5922	-265.005	1	1	1
12.6338	-268.084	1	1	1
12.6755	-271.814	1	1	1
12.7172	-275.851	1	1	1
12.7588	-278.838	1	1	1
12.8005	-283.772	1	1	1
12.8422	-288.93	1	1	1
12.8838	-294.516	1	1	1
12.9255	-299.562	1	1	1
12.9672	-301.876	1	1	1
13.0088	-310.836	1	1	1
13.0505	-319.052	1	1	1
13.0922	-326.534	1	1	1
13.1338	-335.127	1	1	1
13.1755	-343.935	1	1	1
13.2172	-354.037	1	1	1
13.2588	-364.302	1	1	1
13.3005	-375.943	1	1	1
13.3422	-386.626	1	1	1
13.3838	-401.07	1	1	1
13.4255	-415.372	1	1	1
13.4672	-432.508	1	1	1
13.5088	-452.192	1	1	1
13.5505	-473.099	1	1	1
13.5922	-494.322	1	1	1
13.6338	-521.162	1	1	1
13.6755	-551.702	1	1	1
13.7172	-583.66	1	1	1
13.7588	-629.806	1	1	1
13.8005	-680.917	1	1	1
13.8422	-739.052	1	1	1
13.8838	-816.534	1	1	1
13.9255	-893.445	1	1	1
13.9672	-975.056	1	1	1
14.0088	-1123.63	1	1	1
14.0366	-1234.66	1	1	1
15.5088	-8970.44	1	1	1
17.4741	0.0863974	2	0	100000

## Sheet: tens_interpolation
		Datum / Zeit	Tension unten [hPa]	Tension oben [hPa]
m_bot	b_bot	2013-07-31 15:49:15	0.65	3.59
82.8	-3.43509e+06	2013-07-31 16:09:15	1.8	4.76
m_top	b_top	2013-07-31 15:53:59	0.921717	3.86644
84.24	-3.49483e+06	y = m*x+b
		AE unten [t]	AE oben [t]
		41227.2
			Brutto-Gewicht [g]	Netto-Gewicht [g]
-1.40314	58626.9	2013-08-23 17:58:52	382.99	12.72
		2013-08-24 10:54:53	382	11.73
-1.40314	58256.7	2013-08-24 06:49:00	382.24	11.9696
			AE unten
m_bot	b_bot	2012-11-12 09:53:11	605.57	48.07
-4.06713	168275	2012-11-15 10:52:53	593.2	35.7		41210.7
m_top	b_top	41228.2	594.395	36.8954		17.4741
-4.06713	167717	y = m*x+b				41228.2
