# Supplementary material for: A pore-size classification for peat bogs derived from unsaturated hydraulic properties
Source: Copernicus journal article supplement (doi:10.5194/hess-21-6185-2017), 2017-12-07
Supplement: Supplementary file 9 [file F2_HYDRUS.xlsx]

## Sheet: Gewicht
Datum / Zeit	Brutto-Gewicht [g]	Netto-Gewicht [g]	Gewichtsänderung [g]	Zeit [d]	Theta [-]	Verdunstungsrate [cm/d]		Volumen	240.58
2013-07-31 15:29:23	570.41	196.21	0					Höhe	5
2013-08-01 07:31:57	563.03	188.83	-7.38	0.668449	0.758958	0.229456		A	48.116
2013-08-01 20:13:38	556.27	182.07	-14.14	1.19739	0.730859	0.265614		Theta0	0.789633
2013-08-02 08:33:51	550.82	176.62	-19.59	1.71143	0.708205	0.220348		Trockengewicht	6.24
2013-08-02 12:40:04	549.03	174.83	-21.38	1.88242	0.700765	0.217569		Ks (as in Ksat)
2013-08-02 19:48:08	544.45	170.25	-25.96	2.17968	0.681727	0.320214		delta System [g]	374.2
2013-08-03 07:05:52	538.69	164.49	-31.72	2.65033	0.657785	0.25435
2013-08-03 15:09:11	534.95	160.75	-35.46	2.98596	0.64224	0.23159
2013-08-03 21:06:59	532.06	157.86	-38.35	3.23443	0.630227	0.241731
2013-08-04 10:12:57	527.24	153.04	-43.17	3.78025	0.610192	0.183531
2013-08-04 20:16:17	522.9	148.7	-47.51	4.19923	0.592152	0.215285
2013-08-05 08:39:55	517.98	143.78	-52.43	4.71564	0.571702	0.198008
2013-08-05 13:27:52	515.86	141.66	-54.55	4.91561	0.56289	0.220336
2013-08-05 20:45:27	511.91	137.71	-58.5	5.21949	0.546471	0.270149
2013-08-06 07:19:42	507.71	133.51	-62.7	5.65994	0.529013	0.198182
2013-08-06 12:49:21	505.64	131.44	-64.77	5.88886	0.520409	0.187925
2013-08-06 18:17:47	502.71	128.51	-67.7	6.11694	0.50823	0.266984
2013-08-07 08:11:16	497.1	122.9	-73.31	6.69574	0.484911	0.20144
2013-08-07 13:11:33	495.28	121.08	-75.13	6.90428	0.477346	0.181388
2013-08-07 19:27:11	493.08	118.88	-77.33	7.16514	0.468202	0.175275
2013-08-08 08:26:52	488.94	114.74	-81.47	7.70658	0.450993	0.158914
2013-08-08 19:51:04	484.95	110.75	-85.46	8.18172	0.434409	0.174525
2013-08-09 09:27:52	479.43	105.23	-90.98	8.74894	0.411464	0.202255
2013-08-09 13:18:10	477.71	103.51	-92.7	8.90887	0.404315	0.223519
2013-08-09 18:31:21	474.93	100.73	-95.48	9.12636	0.392759	0.265649
2013-08-10 09:23:29	467.45	93.25	-102.96	9.74589	0.361668	0.250927
2013-08-10 17:41:03	463.37	89.17	-107.04	10.0914	0.344709	0.245406
2013-08-11 05:22:04	457.51	83.31	-112.9	10.5782	0.320351	0.250171
2013-08-11 20:24:25	449.81	75.61	-120.6	11.2049	0.288345	0.255383
2013-08-12 08:36:27	443.84	69.64	-126.57	11.7132	0.26353	0.24407
2013-08-12 12:47:47	442.01	67.81	-128.4	11.8878	0.255923	0.217907
2013-08-12 17:58:31	439.8	65.6	-130.61	12.1036	0.246737	0.212848
2013-08-13 08:06:59	433.58	59.38	-136.83	12.6928	0.220883	0.219397
2013-08-13 12:55:03	431.46	57.26	-138.95	12.8928	0.212071	0.220256
2013-08-13 19:56:36	428.32	54.12	-142.09	13.1856	0.199019	0.22292
2013-08-14 07:54:12	423.53	49.33	-146.88	13.6839	0.179109	0.199765
2013-08-14 12:31:05	421.91	47.71	-148.5	13.8762	0.172375	0.175102
2013-08-14 17:59:21	420	45.8	-150.41	14.1041	0.164436	0.174135
2013-08-14 18:21:11	419.88	45.68	-150.53	14.1193	0.163937	0.16451
2013-08-15 11:12:41	414.82	40.62	-155.59	14.8217	0.142905	0.149713
2013-08-15 16:32:08	413.45	39.25	-156.96	15.0436	0.13721	0.128345
2013-08-15 19:16:55	412.76	38.56	-157.65	15.158	0.134342	0.125328
2013-08-16 08:58:33	409.77	35.57	-160.64	15.7286	0.121914	0.10891
2013-08-16 12:40:55	409.02	34.82	-161.39	15.883	0.118796	0.100935
2013-08-16 19:23:35	407.61	33.41	-162.8	16.1626	0.112935	0.104798
2013-08-17 09:24:04	404.94	30.74	-165.47	16.7463	0.101837	0.0950729
2013-08-17 15:09:44	403.99	29.79	-166.42	16.9864	0.0978884	0.0822478
2013-08-17 19:24:23	403.28	29.08	-167.13	17.1632	0.0949372	0.0834444
2013-08-18 09:15:44	401.23	27.03	-169.18	17.7405	0.0864162	0.0737976
2013-08-18 19:53:07	399.75	25.55	-170.66	18.1831	0.0802644	0.0694913
2013-08-19 08:14:13	398.11	23.91	-172.3	18.6978	0.0734475	0.0662291
2013-08-19 15:22:37	397.25	23.05	-173.16	18.9953	0.0698728	0.0600791
2013-08-19 22:10:11	396.4	22.2	-174.01	19.2783	0.0663397	0.0624151
2013-08-20 07:40:22	395.17	20.97	-175.24	19.6743	0.061227	0.0645601
2013-08-20 19:03:12	393.68	19.48	-176.73	20.1485	0.0550337	0.0653037
2013-08-21 07:57:16	391.96	17.76	-178.45	20.686	0.0478843	0.0665006
2013-08-21 20:33:58	390.44	16.24	-179.97	21.2115	0.0415662	0.060117
2013-08-22 08:33:55	389.19	14.99	-181.22	21.7115	0.0363704	0.0519602
2013-08-22 14:34:19	388.54	14.34	-181.87	21.9618	0.0336686	0.0539761
2013-08-22 17:34:12	388.24	14.04	-182.17	22.0867	0.0324216	0.0499136
2013-08-23 08:53:02	386.78	12.58	-183.63	22.7248	0.026353	0.0475541
2013-08-23 13:00:44	386.41	12.21	-184	22.8968	0.024815	0.0447046
2013-08-23 18:01:05	385.96	11.76	-184.45	23.1053	0.0229446	0.0448392
2013-08-24 10:56:57	384.54	10.34	-185.87	23.8108	0.0170421	0.041834
2013-08-24 18:57:50	383.84	9.64	-186.57	24.1448	0.0141325	0.0435632
2013-08-25 11:08:21	382.63	8.43	-187.78	24.8187	0.009103	0.0373125
2013-08-25 22:09:44	381.86	7.66	-188.55	25.278	0.0059024	0.0348427

## Sheet: Tensionen
Datum / Zeit	Tension unten [hPa]	Tension oben [hPa]	Zeit [d]	MP bot(2) [cm]	MP top(1) [cm]	Auswahl	WÄGUNG START
2013-07-29 14:32:20	4.15	6.68	-2.03962	-4.23038	-6.80938		41486.6	-6.9419
2013-07-29 14:33:20	4.15	6.69	-2.03893	-4.23038	-6.81957		2013-07-31 15:29:23
2013-07-29 14:34:20	4.16	6.7	-2.03823	-4.24057	-6.82977
2013-07-29 14:35:20	4.18	6.72	-2.03754	-4.26096	-6.85015
2013-07-29 14:36:20	4.27	6.57	-2.03684	-4.3527	-6.69725
2013-07-29 14:37:20	4.09	6.81	-2.03615	-4.16922	-6.9419
2013-07-29 14:38:20	4.07	6.59	-2.03545	-4.14883	-6.71764
2013-07-29 14:39:20	4.08	6.59	-2.03476	-4.15902	-6.71764
2013-07-29 14:40:20	4.09	6.62	-2.03407	-4.16922	-6.74822
2013-07-29 14:41:20	4.11	6.63	-2.03337	-4.1896	-6.75841
2013-07-29 14:42:20	4.11	6.63	-2.03268	-4.1896	-6.75841
2013-07-29 14:43:20	4.11	6.64	-2.03198	-4.1896	-6.7686
2013-07-29 14:44:20	4.13	6.64	-2.03129	-4.20999	-6.7686
2013-07-29 14:45:20	4.14	6.66	-2.03059	-4.22018	-6.78899
2013-07-29 14:46:20	4.15	6.66	-2.0299	-4.23038	-6.78899
2013-07-29 14:47:20	4.16	6.67	-2.0292	-4.24057	-6.79918
2013-07-29 14:48:20	4.15	6.67	-2.02851	-4.23038	-6.79918
2013-07-29 14:49:20	4.17	6.68	-2.02782	-4.25076	-6.80938
2013-07-29 14:50:20	4.18	6.7	-2.02712	-4.26096	-6.82977
2013-07-29 14:51:20	4.18	6.7	-2.02643	-4.26096	-6.82977
2013-07-29 14:52:20	4.19	6.71	-2.02573	-4.27115	-6.83996
2013-07-29 14:53:20	4.2	6.72	-2.02504	-4.28135	-6.85015
2013-07-29 14:54:20	4.21	6.72	-2.02434	-4.29154	-6.85015
2013-07-29 14:55:20	4.21	6.72	-2.02365	-4.29154	-6.85015
2013-07-29 14:56:20	4.11	6.67	-2.02295	-4.1896	-6.79918
2013-07-29 14:57:20	4.14	6.65	-2.02226	-4.22018	-6.7788
2013-07-29 14:58:20	4.14	6.65	-2.02157	-4.22018	-6.7788
2013-07-29 14:59:20	2.6	5.1	-2.02087	-2.65036	-5.19878
2013-07-29 15:00:20	2.65	5.17	-2.02018	-2.70133	-5.27013
2013-07-29 15:01:20	2.69	5.2	-2.01948	-2.7421	-5.30071
2013-07-29 15:02:20	2.71	5.23	-2.01879	-2.76249	-5.33129
2013-07-29 15:03:20	2.73	5.24	-2.01809	-2.78287	-5.34149
2013-07-29 15:04:20	2.75	5.26	-2.0174	-2.80326	-5.36188
2013-07-29 15:05:20	2.77	5.28	-2.0167	-2.82365	-5.38226
2013-07-29 15:06:20	2.78	5.29	-2.01601	-2.83384	-5.39246
2013-07-29 15:07:20	2.79	5.31	-2.01532	-2.84404	-5.41284
2013-07-29 15:08:20	2.8	5.32	-2.01462	-2.85423	-5.42304
2013-07-29 15:09:20	2.82	5.33	-2.01393	-2.87462	-5.43323
2013-07-29 15:10:20	2.83	5.34	-2.01323	-2.88481	-5.44343
2013-07-29 15:11:20	2.84	5.35	-2.01254	-2.89501	-5.45362
2013-07-29 15:12:20	2.85	5.36	-2.01184	-2.9052	-5.46381
2013-07-29 15:13:20	2.85	5.37	-2.01115	-2.9052	-5.47401
2013-07-29 15:14:20	2.86	5.42	-2.01045	-2.91539	-5.52497
2013-07-29 15:15:20	2.88	5.39	-2.00976	-2.93578	-5.49439
2013-07-29 15:16:20	2.89	5.39	-2.00907	-2.94597	-5.49439
2013-07-29 15:17:20	2.9	5.41	-2.00837	-2.95617	-5.51478
2013-07-29 15:18:20	2.9	5.41	-2.00768	-2.95617	-5.51478
2013-07-29 15:19:20	2.91	5.42	-2.00698	-2.96636	-5.52497
2013-07-29 15:20:20	2.92	5.43	-2.00629	-2.97655	-5.53517
2013-07-29 15:21:20	2.93	5.44	-2.00559	-2.98675	-5.54536
2013-07-29 15:22:20	2.94	5.46	-2.0049	-2.99694	-5.56575
2013-07-29 15:23:20	2.95	5.47	-2.0042	-3.00714	-5.57594
2013-07-29 15:24:20	2.96	5.47	-2.00351	-3.01733	-5.57594
2013-07-29 15:25:20	2.97	5.47	-2.00282	-3.02752	-5.57594
2013-07-29 15:26:20	2.98	5.49	-2.00212	-3.03772	-5.59633
2013-07-29 15:27:20	2.98	5.49	-2.00143	-3.03772	-5.59633
2013-07-29 15:28:20	2.98	5.49	-2.00073	-3.03772	-5.59633
2013-07-29 15:29:20	2.99	5.5	-2.00004	-3.04791	-5.60652
2013-07-29 15:30:20	3	5.52	-1.99934	-3.0581	-5.62691
2013-07-29 15:31:20	3.01	5.52	-1.99865	-3.0683	-5.62691
2013-07-29 15:32:20	3.02	5.53	-1.99795	-3.07849	-5.6371
2013-07-29 15:42:20	3.09	5.6	-1.99101	-3.14985	-5.70846
2013-07-29 15:52:20	3.16	5.67	-1.98407	-3.2212	-5.77982
2013-07-29 16:02:20	3.22	5.74	-1.97712	-3.28236	-5.85117
2013-07-29 16:12:20	3.29	5.79	-1.97018	-3.35372	-5.90214
2013-07-29 16:22:20	3.35	5.85	-1.96323	-3.41488	-5.9633
2013-07-29 16:32:20	3.4	5.9	-1.95629	-3.46585	-6.01427
2013-07-29 16:42:20	3.46	5.96	-1.94934	-3.52701	-6.07543
2013-07-29 16:52:20	3.5	6.01	-1.9424	-3.56779	-6.1264
2013-07-29 17:02:20	2.59	5.1	-1.93545	-2.64016	-5.19878
2013-07-29 17:12:20	2.67	5.18	-1.92851	-2.72171	-5.28033
2013-07-29 17:22:20	2.69	5.19	-1.92157	-2.7421	-5.29052
2013-07-29 17:32:20	2.69	5.21	-1.91462	-2.7421	-5.31091
2013-07-29 17:42:20	2.72	5.24	-1.90768	-2.77268	-5.34149
2013-07-29 17:52:20	2.73	5.25	-1.90073	-2.78287	-5.35168
2013-07-29 18:02:20	2.74	5.26	-1.89379	-2.79307	-5.36188
2013-07-29 18:12:20	2.76	5.28	-1.88684	-2.81346	-5.38226
2013-07-29 18:22:20	2.77	5.29	-1.8799	-2.82365	-5.39246
2013-07-29 18:32:20	2.78	5.29	-1.87295	-2.83384	-5.39246
2013-07-29 18:42:20	2.8	5.32	-1.86601	-2.85423	-5.42304
2013-07-29 18:52:20	2.82	5.34	-1.85907	-2.87462	-5.44343
2013-07-29 19:02:20	2.62	5.17	-1.85212	-2.67074	-5.27013
2013-07-29 19:22:20	3	5.59	-1.83823	-3.0581	-5.69827
2013-07-29 19:32:20	2.99	5.57	-1.83129	-3.04791	-5.67788
2013-07-29 19:42:20	2.97	5.52	-1.82434	-3.02752	-5.62691
2013-07-29 19:52:20	2.95	5.52	-1.8174	-3.00714	-5.62691
2013-07-29 20:02:20	2.96	5.48	-1.81045	-3.01733	-5.58614
2013-07-29 20:12:20	2.97	5.49	-1.80351	-3.02752	-5.59633
2013-07-29 20:22:20	3	5.53	-1.79657	-3.0581	-5.6371
2013-07-29 20:32:20	3.01	5.54	-1.78962	-3.0683	-5.6473
2013-07-29 20:42:20	3.03	5.55	-1.78268	-3.08869	-5.65749
2013-07-29 20:52:20	3.05	5.56	-1.77573	-3.10907	-5.66769
2013-07-29 21:02:20	3.07	5.59	-1.76879	-3.12946	-5.69827
2013-07-29 21:12:20	3.07	5.59	-1.76184	-3.12946	-5.69827
2013-07-29 21:22:20	3.09	5.62	-1.7549	-3.14985	-5.72885
2013-07-29 21:32:20	3.12	5.63	-1.74795	-3.18043	-5.73904
2013-07-29 21:42:20	3.14	5.65	-1.74101	-3.20082	-5.75943
2013-07-29 21:52:20	3.15	5.67	-1.73407	-3.21101	-5.77982
2013-07-29 22:02:20	3.17	5.68	-1.72712	-3.2314	-5.79001
2013-07-29 22:12:20	3.19	5.7	-1.72018	-3.25178	-5.8104
2013-07-29 22:22:20	3.21	5.72	-1.71323	-3.27217	-5.83078
2013-07-29 22:32:20	3.22	5.74	-1.70629	-3.28236	-5.85117
2013-07-29 22:42:20	3.21	5.72	-1.69934	-3.27217	-5.83078
2013-07-29 22:52:20	3.25	5.75	-1.6924	-3.31295	-5.86137
2013-07-29 23:02:20	3.24	5.76	-1.68545	-3.30275	-5.87156
2013-07-29 23:12:20	3.27	5.78	-1.67851	-3.33333	-5.89195
2013-07-29 23:22:20	3.3	5.81	-1.67157	-3.36391	-5.92253
2013-07-29 23:32:20	3.31	5.82	-1.66462	-3.37411	-5.93272
2013-07-29 23:42:20	3.28	5.8	-1.65768	-3.34353	-5.91233
2013-07-29 23:52:20	3.3	5.81	-1.65073	-3.36391	-5.92253
2013-07-30 00:02:20	3.32	5.83	-1.64379	-3.3843	-5.94292
2013-07-30 00:12:20	3.34	5.85	-1.63684	-3.40469	-5.9633
2013-07-30 00:22:20	3.37	5.87	-1.6299	-3.43527	-5.98369
2013-07-30 00:32:20	3.37	5.88	-1.62295	-3.43527	-5.99388
2013-07-30 00:42:20	3.38	5.89	-1.61601	-3.44546	-6.00408
2013-07-30 00:52:20	3.4	5.91	-1.60907	-3.46585	-6.02446
2013-07-30 01:02:20	3.41	5.92	-1.60212	-3.47604	-6.03466
2013-07-30 01:22:20	3.45	5.96	-1.58823	-3.51682	-6.07543
2013-07-30 01:32:20	3.46	5.97	-1.58129	-3.52701	-6.08563
2013-07-30 01:42:20	3.48	5.98	-1.57434	-3.5474	-6.09582
2013-07-30 01:52:20	3.49	6	-1.5674	-3.55759	-6.11621
2013-07-30 02:02:20	3.51	6.02	-1.56045	-3.57798	-6.1366
2013-07-30 02:12:20	3.5	6.01	-1.55351	-3.56779	-6.1264
2013-07-30 02:22:20	3.5	6.02	-1.54657	-3.56779	-6.1366
2013-07-30 02:32:20	3.52	6.03	-1.53962	-3.58818	-6.14679
2013-07-30 02:42:20	3.54	6.05	-1.53268	-3.60856	-6.16718
2013-07-30 02:52:20	3.52	6.03	-1.52573	-3.58818	-6.14679
2013-07-30 03:02:20	3.54	6.05	-1.51879	-3.60856	-6.16718
2013-07-30 03:12:20	3.56	6.06	-1.51184	-3.62895	-6.17737
2013-07-30 03:22:20	3.56	6.07	-1.5049	-3.62895	-6.18756
2013-07-30 03:32:20	3.53	6.05	-1.49795	-3.59837	-6.16718
2013-07-30 03:42:20	3.56	6.06	-1.49101	-3.62895	-6.17737
2013-07-30 03:52:20	3.58	6.08	-1.48407	-3.64934	-6.19776
2013-07-30 04:02:20	3.58	6.09	-1.47712	-3.64934	-6.20795
2013-07-30 04:12:20	3.59	6.1	-1.47018	-3.65953	-6.21814
2013-07-30 04:22:20	3.61	6.11	-1.46323	-3.67992	-6.22834
2013-07-30 04:32:20	3.62	6.13	-1.45629	-3.69011	-6.24873
2013-07-30 04:42:20	3.63	6.13	-1.44934	-3.70031	-6.24873
2013-07-30 04:52:20	3.63	6.14	-1.4424	-3.70031	-6.25892
2013-07-30 05:02:20	3.67	6.16	-1.43545	-3.74108	-6.27931
2013-07-30 05:12:20	3.67	6.17	-1.42851	-3.74108	-6.2895
2013-07-30 05:22:20	3.68	6.18	-1.42157	-3.75127	-6.29969
2013-07-30 05:32:20	3.7	6.2	-1.41462	-3.77166	-6.32008
2013-07-30 05:42:20	3.72	6.21	-1.40768	-3.79205	-6.33028
2013-07-30 05:52:20	3.73	6.23	-1.40073	-3.80224	-6.35066
2013-07-30 06:02:20	3.74	6.24	-1.39379	-3.81244	-6.36086
2013-07-30 06:12:20	3.71	6.22	-1.38684	-3.78186	-6.34047
2013-07-30 06:22:20	3.68	6.18	-1.3799	-3.75127	-6.29969
2013-07-30 06:32:20	3.69	6.2	-1.37295	-3.76147	-6.32008
2013-07-30 06:42:20	3.7	6.21	-1.36601	-3.77166	-6.33028
2013-07-30 06:52:20	3.72	6.22	-1.35907	-3.79205	-6.34047
2013-07-30 07:02:20	3.74	6.24	-1.35212	-3.81244	-6.36086
2013-07-30 07:12:20	3.67	6.18	-1.34518	-3.74108	-6.29969
2013-07-30 07:22:20	3.69	6.19	-1.33823	-3.76147	-6.30989
2013-07-30 07:32:20	3.71	6.21	-1.33129	-3.78186	-6.33028
2013-07-30 07:42:20	3.72	6.23	-1.32434	-3.79205	-6.35066
2013-07-30 07:52:20	3.74	6.24	-1.3174	-3.81244	-6.36086
2013-07-30 08:02:20	3.78	6.28	-1.31045	-3.85321	-6.40163
2013-07-30 08:12:20	3.77	6.27	-1.30351	-3.84302	-6.39144
2013-07-30 08:22:20	3.78	6.29	-1.29657	-3.85321	-6.41182
2013-07-30 08:32:20	3.8	6.3	-1.28962	-3.8736	-6.42202
2013-07-30 08:42:20	3.81	6.32	-1.28268	-3.88379	-6.44241
2013-07-30 08:52:20	3.81	6.3	-1.27573	-3.88379	-6.42202
2013-07-30 09:02:20	3.82	6.32	-1.26879	-3.89399	-6.44241
2013-07-30 09:12:20	3.84	6.34	-1.26184	-3.91437	-6.46279
2013-07-30 09:22:20	3.86	6.35	-1.2549	-3.93476	-6.47299
2013-07-30 09:32:20	3.86	6.36	-1.24795	-3.93476	-6.48318
2013-07-30 09:42:20	3.88	6.38	-1.24101	-3.95515	-6.50357
2013-07-30 09:52:20	3.84	6.34	-1.23407	-3.91437	-6.46279
2013-07-30 10:02:20	2.87	5.38	-1.22712	-2.92559	-5.4842
2013-07-30 10:12:20	2.95	5.45	-1.22018	-3.00714	-5.55556
2013-07-30 10:22:20	2.97	5.46	-1.21323	-3.02752	-5.56575
2013-07-30 10:32:20	2.49	4.99	-1.20629	-2.53823	-5.08665
2013-07-30 10:42:20	2.58	5.07	-1.19934	-2.62997	-5.1682
2013-07-30 10:52:20	2.63	5.13	-1.1924	-2.68094	-5.22936
2013-07-30 11:02:20	2.68	5.17	-1.18545	-2.73191	-5.27013
2013-07-30 11:12:20	2.72	5.21	-1.17851	-2.77268	-5.31091
2013-07-30 11:22:20	2.74	5.23	-1.17157	-2.79307	-5.33129
2013-07-30 11:32:20	2.78	5.28	-1.16462	-2.83384	-5.38226
2013-07-30 11:42:20	2.81	5.3	-1.15768	-2.86442	-5.40265
2013-07-30 11:52:20	2.82	5.31	-1.15073	-2.87462	-5.41284
2013-07-30 12:02:20	2.84	5.33	-1.14379	-2.89501	-5.43323
2013-07-30 12:12:20	2.86	5.35	-1.13684	-2.91539	-5.45362
2013-07-30 12:22:20	2.87	5.36	-1.1299	-2.92559	-5.46381
2013-07-30 12:32:20	2.89	5.38	-1.12295	-2.94597	-5.4842
2013-07-30 12:42:20	2.9	5.4	-1.11601	-2.95617	-5.50459
2013-07-30 12:52:20	2.92	5.42	-1.10907	-2.97655	-5.52497
2013-07-30 13:02:20	2.93	5.43	-1.10212	-2.98675	-5.53517
2013-07-30 13:12:20	2.95	5.45	-1.09518	-3.00714	-5.55556
2013-07-30 13:22:20	2.96	5.46	-1.08823	-3.01733	-5.56575
2013-07-30 13:32:20	2.98	5.47	-1.08129	-3.03772	-5.57594
2013-07-30 13:42:20	2.99	5.48	-1.07434	-3.04791	-5.58614
2013-07-30 13:52:20	3.01	5.5	-1.0674	-3.0683	-5.60652
2013-07-30 14:02:20	3.03	5.53	-1.06045	-3.08869	-5.6371
2013-07-30 14:12:20	3.02	5.53	-1.05351	-3.07849	-5.6371
2013-07-30 14:22:20	3.06	5.54	-1.04657	-3.11927	-5.6473
2013-07-30 14:32:20	3.07	5.57	-1.03962	-3.12946	-5.67788
2013-07-30 14:42:20	3.09	5.57	-1.03268	-3.14985	-5.67788
2013-07-30 14:52:20	3.1	5.59	-1.02573	-3.16004	-5.69827
2013-07-30 15:02:20	3.11	5.6	-1.01879	-3.17023	-5.70846
2013-07-30 15:12:20	3.13	5.62	-1.01184	-3.19062	-5.72885
2013-07-30 15:22:20	3.15	5.65	-1.0049	-3.21101	-5.75943
2013-07-30 15:32:20	3.16	5.65	-0.997955	-3.2212	-5.75943
2013-07-30 15:42:20	3.13	5.62	-0.99101	-3.19062	-5.72885
2013-07-30 16:02:20	3.18	5.68	-0.977121	-3.24159	-5.79001
2013-07-30 16:12:20	3.2	5.69	-0.970177	-3.26198	-5.8002
2013-07-30 16:22:20	3.21	5.7	-0.963233	-3.27217	-5.8104
2013-07-30 16:32:20	3.23	5.71	-0.956288	-3.29256	-5.82059
2013-07-30 16:42:20	3.24	5.73	-0.949344	-3.30275	-5.84098
2013-07-30 16:52:20	3.27	5.76	-0.942399	-3.33333	-5.87156
2013-07-30 17:02:20	3.22	5.71	-0.935455	-3.28236	-5.82059
2013-07-30 17:12:20	3.24	5.72	-0.92851	-3.30275	-5.83078
2013-07-30 17:22:20	3.27	5.75	-0.921566	-3.33333	-5.86137
2013-07-30 17:32:20	3.31	5.78	-0.914621	-3.37411	-5.89195
2013-07-30 17:42:20	3.31	5.81	-0.907677	-3.37411	-5.92253
2013-07-30 17:52:20	3.33	5.81	-0.900733	-3.3945	-5.92253
2013-07-30 18:02:20	3.35	5.84	-0.893788	-3.41488	-5.95311
2013-07-30 18:12:20	3.36	5.85	-0.886844	-3.42508	-5.9633
2013-07-30 18:22:20	3.37	5.87	-0.879899	-3.43527	-5.98369
2013-07-30 18:32:20	3.4	5.89	-0.872955	-3.46585	-6.00408
2013-07-30 18:42:20	3.39	5.88	-0.86601	-3.45566	-5.99388
2013-07-30 18:52:20	3.42	5.91	-0.859066	-3.48624	-6.02446
2013-07-30 19:02:20	3.45	5.92	-0.852121	-3.51682	-6.03466
2013-07-30 19:12:20	3.46	5.93	-0.845177	-3.52701	-6.04485
2013-07-30 19:22:20	3.47	5.96	-0.838233	-3.53721	-6.07543
2013-07-30 19:32:20	3.44	5.93	-0.831288	-3.50663	-6.04485
2013-07-30 19:42:20	3.46	5.94	-0.824344	-3.52701	-6.05505
2013-07-30 19:52:20	3.48	5.97	-0.817399	-3.5474	-6.08563
2013-07-30 20:02:20	3.47	5.95	-0.810455	-3.53721	-6.06524
2013-07-30 20:12:20	3.5	5.98	-0.80351	-3.56779	-6.09582
2013-07-30 20:22:20	3.51	5.99	-0.796566	-3.57798	-6.10601
2013-07-30 20:32:20	3.53	6.02	-0.789621	-3.59837	-6.1366
2013-07-30 20:42:20	3.54	6.02	-0.782677	-3.60856	-6.1366
2013-07-30 20:52:20	3.55	6.03	-0.775733	-3.61876	-6.14679
2013-07-30 21:02:20	3.57	6.05	-0.768788	-3.63914	-6.16718
2013-07-30 21:12:20	3.57	6.07	-0.761844	-3.63914	-6.18756
2013-07-30 21:22:20	3.59	6.08	-0.754899	-3.65953	-6.19776
2013-07-30 21:32:20	3.62	6.1	-0.747955	-3.69011	-6.21814
2013-07-30 21:42:20	3.64	6.12	-0.74101	-3.7105	-6.23853
2013-07-30 21:52:20	3.66	6.13	-0.734066	-3.73089	-6.24873
2013-07-30 22:02:20	3.67	6.15	-0.727121	-3.74108	-6.26911
2013-07-30 22:12:20	3.68	6.17	-0.720177	-3.75127	-6.2895
2013-07-30 22:22:20	3.7	6.19	-0.713233	-3.77166	-6.30989
2013-07-30 22:32:20	3.72	6.2	-0.706288	-3.79205	-6.32008
2013-07-30 22:42:20	3.73	6.21	-0.699344	-3.80224	-6.33028
2013-07-30 22:52:20	3.74	6.22	-0.692399	-3.81244	-6.34047
2013-07-30 23:02:20	3.74	6.23	-0.685455	-3.81244	-6.35066
2013-07-30 23:12:20	3.72	6.2	-0.67851	-3.79205	-6.32008
2013-07-30 23:22:20	3.74	6.22	-0.671566	-3.81244	-6.34047
2013-07-30 23:32:20	3.76	6.23	-0.664621	-3.83282	-6.35066
2013-07-30 23:42:20	3.76	6.26	-0.657677	-3.83282	-6.38124
2013-07-30 23:52:20	3.78	6.27	-0.650733	-3.85321	-6.39144
2013-07-31 00:02:20	3.8	6.29	-0.643788	-3.8736	-6.41182
2013-07-31 00:12:20	3.82	6.3	-0.636844	-3.89399	-6.42202
2013-07-31 00:22:20	3.83	6.32	-0.629899	-3.90418	-6.44241
2013-07-31 00:32:20	3.86	6.33	-0.622955	-3.93476	-6.4526
2013-07-31 00:42:20	3.85	6.34	-0.61601	-3.92457	-6.46279
2013-07-31 00:52:20	3.87	6.35	-0.609066	-3.94495	-6.47299
2013-07-31 01:02:20	3.88	6.37	-0.602121	-3.95515	-6.49337
2013-07-31 01:12:20	3.88	6.37	-0.595177	-3.95515	-6.49337
2013-07-31 01:22:20	3.89	6.37	-0.588233	-3.96534	-6.49337
2013-07-31 01:32:20	3.9	6.38	-0.581288	-3.97554	-6.50357
2013-07-31 01:42:20	3.91	6.4	-0.574344	-3.98573	-6.52396
2013-07-31 01:52:20	3.94	6.42	-0.567399	-4.01631	-6.54434
2013-07-31 02:02:20	3.94	6.43	-0.560455	-4.01631	-6.55454
2013-07-31 02:12:20	3.91	6.38	-0.55351	-3.98573	-6.50357
2013-07-31 02:22:20	3.93	6.41	-0.546566	-4.00612	-6.53415
2013-07-31 02:32:20	3.94	6.42	-0.539621	-4.01631	-6.54434
2013-07-31 02:42:20	3.96	6.43	-0.532677	-4.0367	-6.55454
2013-07-31 02:52:20	3.98	6.44	-0.525733	-4.05708	-6.56473
2013-07-31 03:02:20	3.95	6.44	-0.518788	-4.0265	-6.56473
2013-07-31 03:12:20	3.97	6.46	-0.511844	-4.04689	-6.58512
2013-07-31 03:22:20	3.98	6.46	-0.504899	-4.05708	-6.58512
2013-07-31 03:32:20	4	6.48	-0.497955	-4.07747	-6.6055
2013-07-31 03:42:20	3.99	6.48	-0.49101	-4.06728	-6.6055
2013-07-31 03:52:20	4.02	6.49	-0.484066	-4.09786	-6.6157
2013-07-31 04:02:20	4.02	6.51	-0.477121	-4.09786	-6.63609
2013-07-31 04:12:20	4.04	6.53	-0.470177	-4.11825	-6.65647
2013-07-31 04:22:20	4.06	6.54	-0.463233	-4.13863	-6.66667
2013-07-31 04:32:20	4.06	6.54	-0.456288	-4.13863	-6.66667
2013-07-31 04:42:20	4.08	6.55	-0.449344	-4.15902	-6.67686
2013-07-31 04:52:20	4.1	6.57	-0.442399	-4.17941	-6.69725
2013-07-31 05:02:20	4.1	6.58	-0.435455	-4.17941	-6.70744
2013-07-31 05:12:20	4.11	6.59	-0.42851	-4.1896	-6.71764
2013-07-31 05:22:20	4.12	6.6	-0.421566	-4.1998	-6.72783
2013-07-31 05:32:20	4.13	6.61	-0.414621	-4.20999	-6.73802
2013-07-31 05:42:20	4.15	6.62	-0.407677	-4.23038	-6.74822
2013-07-31 05:52:20	4.15	6.64	-0.400733	-4.23038	-6.7686
2013-07-31 06:02:20	4.17	6.65	-0.393788	-4.25076	-6.7788
2013-07-31 06:12:20	4.19	6.67	-0.386844	-4.27115	-6.79918
2013-07-31 06:22:20	4.21	6.68	-0.379899	-4.29154	-6.80938
2013-07-31 06:32:20	4.22	6.68	-0.372955	-4.30173	-6.80938
2013-07-31 06:42:20	4.22	6.7	-0.36601	-4.30173	-6.82977
2013-07-31 06:52:20	4.22	6.7	-0.359066	-4.30173	-6.82977
2013-07-31 07:02:20	4.24	6.71	-0.352121	-4.32212	-6.83996
2013-07-31 07:12:20	4.25	6.73	-0.345177	-4.33231	-6.86035
2013-07-31 07:22:20	4.26	6.73	-0.338233	-4.34251	-6.86035
2013-07-31 07:32:20	4.28	6.75	-0.331288	-4.3629	-6.88073
2013-07-31 07:42:20	4.3	6.77	-0.324344	-4.38328	-6.90112
2013-07-31 07:52:20	4.31	6.78	-0.317399	-4.39348	-6.91131
2013-07-31 08:02:20	4.33	6.8	-0.310455	-4.41386	-6.9317
2013-07-31 08:12:20	4.34	6.81	-0.30351	-4.42406	-6.9419
2013-07-31 08:22:20	4.34	6.81	-0.296566	-4.42406	-6.9419
2013-07-31 08:32:20	4.35	6.82	-0.289621	-4.43425	-6.95209
2013-07-31 08:42:20	4.37	6.84	-0.282677	-4.45464	-6.97248
2013-07-31 08:52:20	3.94	6.41	-0.275733	-4.01631	-6.53415
2013-07-31 09:02:20	2.9	5.37	-0.268788	-2.95617	-5.47401
2013-07-31 09:12:20	2.93	5.39	-0.261844	-2.98675	-5.49439
2013-07-31 09:22:20	3	5.46	-0.254899	-3.0581	-5.56575
2013-07-31 09:42:20	3.04	5.52	-0.24101	-3.09888	-5.62691
2013-07-31 09:52:20	3.06	5.53	-0.234066	-3.11927	-5.6371
2013-07-31 10:02:20	3.08	5.55	-0.227121	-3.13965	-5.65749
2013-07-31 10:12:20	3.12	5.59	-0.220177	-3.18043	-5.69827
2013-07-31 10:22:20	3.15	5.62	-0.213233	-3.21101	-5.72885
2013-07-31 10:32:20	3.16	5.64	-0.206288	-3.2212	-5.74924
2013-07-31 10:52:20	2.16	4.63	-0.192399	-2.20183	-4.71967
2013-07-31 11:02:20	2.25	4.71	-0.185455	-2.29358	-4.80122
2013-07-31 11:12:20	2.3	4.76	-0.17851	-2.34455	-4.85219
2013-07-31 11:22:20	2.37	4.84	-0.171566	-2.4159	-4.93374
2013-07-31 11:32:20	2.41	4.89	-0.164621	-2.45668	-4.98471
2013-07-31 11:42:20	2.43	4.9	-0.157677	-2.47706	-4.9949
2013-07-31 11:52:20	2.46	4.94	-0.150733	-2.50765	-5.03568
2013-07-31 12:02:20	2.49	4.96	-0.143788	-2.53823	-5.05607
2013-07-31 12:12:20	2.52	4.99	-0.136844	-2.56881	-5.08665
2013-07-31 12:22:20	2.56	5.03	-0.129899	-2.60958	-5.12742
2013-07-31 12:32:20	2.58	5.05	-0.122955	-2.62997	-5.14781
2013-07-31 12:42:20	2.62	5.08	-0.11601	-2.67074	-5.17839
2013-07-31 12:52:20	2.64	5.11	-0.109066	-2.69113	-5.20897
2013-07-31 13:02:20	2.68	5.14	-0.102121	-2.73191	-5.23955
2013-07-31 13:12:20	2.69	5.16	-0.095177	-2.7421	-5.25994
2013-07-31 13:22:20	2.73	5.2	-0.0882326	-2.78287	-5.30071
2013-07-31 13:32:20	2.75	5.21	-0.0812882	-2.80326	-5.31091
2013-07-31 13:42:20	2.77	5.24	-0.0743437	-2.82365	-5.34149
2013-07-31 13:52:20	2.81	5.27	-0.0673993	-2.86442	-5.37207
2013-07-31 14:02:20	2.83	5.3	-0.0604548	-2.88481	-5.40265
2013-07-31 14:12:20	2.85	5.31	-0.0535104	-2.9052	-5.41284
2013-07-31 14:22:20	2.86	5.33	-0.0465659	-2.91539	-5.43323
2013-07-31 14:32:20	2.88	5.34	-0.0396215	-2.93578	-5.44343
2013-07-31 14:42:20	2.89	5.36	-0.032677	-2.94597	-5.46381
2013-07-31 14:46:40	2.89	5.36	-0.029671	-2.94597	-5.46381
2013-07-31 14:47:40	2.89	5.35	-0.0289766	-2.94597	-5.45362
2013-07-31 14:49:15	2.89	5.37	-0.027876	-2.94597	-5.47401
2013-07-31 14:50:15	2.9	5.37	-0.0271815	-2.95617	-5.47401
2013-07-31 14:51:15	2.89	5.37	-0.0264871	-2.94597	-5.47401
2013-07-31 14:53:15	2.91	5.37	-0.0250982	-2.96636	-5.47401
2013-07-31 14:54:15	2.91	5.37	-0.0244038	-2.96636	-5.47401
2013-07-31 14:55:15	2.89	5.37	-0.0237093	-2.94597	-5.47401
2013-07-31 14:56:15	2.9	5.37	-0.0230149	-2.95617	-5.47401
2013-07-31 14:57:15	2.89	5.37	-0.0223204	-2.94597	-5.47401
2013-07-31 14:58:15	2.9	5.37	-0.021626	-2.95617	-5.47401
2013-07-31 14:59:15	2.91	5.39	-0.0209315	-2.96636	-5.49439
2013-07-31 15:00:15	2.92	5.38	-0.0202371	-2.97655	-5.4842
2013-07-31 15:01:15	2.92	5.37	-0.0195426	-2.97655	-5.47401
2013-07-31 15:02:15	2.93	5.4	-0.0188482	-2.98675	-5.50459
2013-07-31 15:03:15	2.9	5.39	-0.0181538	-2.95617	-5.49439
2013-07-31 15:04:15	2.9	5.38	-0.0174593	-2.95617	-5.4842
2013-07-31 15:05:15	2.92	5.38	-0.0167649	-2.97655	-5.4842
2013-07-31 15:06:15	2.92	5.39	-0.0160704	-2.97655	-5.49439
2013-07-31 15:07:15	2.92	5.4	-0.015376	-2.97655	-5.50459
2013-07-31 15:08:15	2.92	5.39	-0.0146815	-2.97655	-5.49439
2013-07-31 15:09:15	2.92	5.39	-0.0139871	-2.97655	-5.49439
2013-07-31 15:10:15	2.92	5.39	-0.0132926	-2.97655	-5.49439
2013-07-31 15:11:15	2.93	5.4	-0.0125982	-2.98675	-5.50459
2013-07-31 15:12:15	2.92	5.4	-0.0119038	-2.97655	-5.50459
2013-07-31 15:13:15	2.93	5.4	-0.0112093	-2.98675	-5.50459
2013-07-31 15:14:15	2.92	5.4	-0.0105149	-2.97655	-5.50459
2013-07-31 15:15:15	2.93	5.41	-0.00982042	-2.98675	-5.51478
2013-07-31 15:16:15	2.92	5.4	-0.00912598	-2.97655	-5.50459
2013-07-31 15:18:15	2.93	5.4	-0.00773709	-2.98675	-5.50459
2013-07-31 15:19:15	2.93	5.4	-0.00704264	-2.98675	-5.50459
2013-07-31 15:20:15	2.92	5.42	-0.0063482	-2.97655	-5.52497
2013-07-31 15:21:15	2.93	5.42	-0.00565375	-2.98675	-5.52497
2013-07-31 15:22:15	2.94	5.42	-0.00495931	-2.99694	-5.52497
2013-07-31 15:23:15	2.94	5.41	-0.00426487	-2.99694	-5.51478
2013-07-31 15:24:15	2.95	5.42	-0.00357042	-3.00714	-5.52497
2013-07-31 15:25:15	2.96	5.42	-0.00287598	-3.01733	-5.52497
2013-07-31 15:26:15	2.94	5.42	-0.00218153	-2.99694	-5.52497
2013-07-31 15:27:15	2.95	5.43	-0.00148709	-3.00714	-5.53517
2013-07-31 15:35:15	3.29	5.94	0.00406847	-3.35372	-6.05505
2013-07-31 15:37:15	3.56	6.16	0.00545736	-3.62895	-6.27931
2013-07-31 15:38:15	3.68	6.26	0.0061518	-3.75127	-6.38124
2013-07-31 15:39:15	3.76	6.33	0.00684625	-3.83282	-6.4526	2013-07-31 15:39:15
2013-07-31 15:40:15	3.8	6.37	0.00754069	-3.8736	-6.49337
2013-07-31 15:41:15	3.83	6.39	0.00823513	-3.90418	-6.51376
2013-07-31 15:42:15	3.86	6.41	0.00892958	-3.93476	-6.53415
2013-07-31 15:43:15	3.85	6.4	0.00962402	-3.92457	-6.52396
2013-07-31 15:44:15	3.88	6.4	0.0103185	-3.95515	-6.52396
2013-07-31 15:45:15	3.89	6.42	0.0110129	-3.96534	-6.54434
2013-07-31 15:46:15	3.87	6.4	0.0117074	-3.94495	-6.52396
2013-07-31 15:47:15	3.87	6.4	0.0124018	-3.94495	-6.52396
2013-07-31 15:48:15	3.88	6.41	0.0130962	-3.95515	-6.53415
2013-07-31 15:49:15	3.88	6.4	0.0137907	-3.95515	-6.52396
2013-07-31 15:59:15	3.86	6.37	0.0207351	-3.93476	-6.49337
2013-07-31 16:09:15	3.88	6.4	0.0276796	-3.95515	-6.52396
2013-07-31 16:19:15	3.88	6.39	0.034624	-3.95515	-6.51376
2013-07-31 16:29:15	3.93	6.44	0.0415685	-4.00612	-6.56473
2013-07-31 16:39:15	3.97	6.48	0.0485129	-4.04689	-6.6055	2013-07-31 16:39:15
2013-07-31 16:49:15	3.97	6.48	0.0554574	-4.04689	-6.6055
2013-07-31 16:59:15	4.01	6.52	0.0624018	-4.08767	-6.64628
2013-07-31 17:09:15	4.06	6.57	0.0693462	-4.13863	-6.69725
2013-07-31 17:19:15	4.12	6.62	0.0762907	-4.1998	-6.74822
2013-07-31 17:29:15	4.16	6.67	0.0832351	-4.24057	-6.79918
2013-07-31 17:39:15	4.2	6.71	0.0901796	-4.28135	-6.83996	2013-07-31 17:39:15
2013-07-31 17:49:15	4.25	6.77	0.097124	-4.33231	-6.90112
2013-07-31 17:59:15	4.28	6.8	0.104068	-4.3629	-6.9317
2013-07-31 18:09:15	4.03	6.58	0.111013	-4.10805	-6.70744
2013-07-31 18:19:15	4.07	6.58	0.117957	-4.14883	-6.70744
2013-07-31 18:29:15	4.13	6.63	0.124902	-4.20999	-6.75841
2013-07-31 18:39:15	4.16	6.68	0.131846	-4.24057	-6.80938	2013-07-31 18:39:15
2013-07-31 18:49:15	4.21	6.72	0.138791	-4.29154	-6.85015
2013-07-31 18:59:15	4.25	6.76	0.145735	-4.33231	-6.89093
2013-07-31 19:09:15	4.28	6.8	0.15268	-4.3629	-6.9317
2013-07-31 19:19:15	4.32	6.83	0.159624	-4.40367	-6.96228
2013-07-31 19:29:15	4.36	6.88	0.166568	-4.44444	-7.01325
2013-07-31 19:39:15	4.38	6.89	0.173513	-4.46483	-7.02345	2013-07-31 19:39:15
2013-07-31 19:49:15	4.44	6.94	0.180457	-4.52599	-7.07441
2013-07-31 19:59:15	4.45	6.96	0.187402	-4.53619	-7.0948
2013-07-31 20:09:15	4.47	6.99	0.194346	-4.55657	-7.12538
2013-07-31 20:19:15	4.5	7.02	0.201291	-4.58716	-7.15596
2013-07-31 20:29:15	4.52	7.05	0.208235	-4.60754	-7.18654
2013-07-31 20:39:15	4.56	7.08	0.21518	-4.64832	-7.21713	2013-07-31 20:39:15
2013-07-31 20:49:15	4.59	7.1	0.222124	-4.6789	-7.23751
2013-07-31 20:59:15	4.62	7.14	0.229068	-4.70948	-7.27829
2013-07-31 21:09:15	4.64	7.16	0.236013	-4.72987	-7.29867
2013-07-31 21:19:15	4.68	7.2	0.242957	-4.77064	-7.33945
2013-07-31 21:29:15	4.69	7.21	0.249902	-4.78084	-7.34964
2013-07-31 21:39:15	4.71	7.23	0.256846	-4.80122	-7.37003	2013-07-31 21:39:15
2013-07-31 21:49:15	4.76	7.26	0.263791	-4.85219	-7.40061
2013-07-31 21:59:15	4.75	7.27	0.270735	-4.842	-7.41081
2013-07-31 22:09:15	4.79	7.31	0.27768	-4.88277	-7.45158
2013-07-31 22:19:15	4.83	7.35	0.284624	-4.92355	-7.49235
2013-07-31 22:29:15	4.84	7.36	0.291568	-4.93374	-7.50255
2013-07-31 22:39:15	4.89	7.4	0.298513	-4.98471	-7.54332	2013-07-31 22:39:15
2013-07-31 22:49:15	4.91	7.42	0.305457	-5.0051	-7.56371
2013-07-31 22:59:15	4.89	7.41	0.312402	-4.98471	-7.55352
2013-07-31 23:09:15	4.93	7.45	0.319346	-5.02548	-7.59429
2013-07-31 23:19:15	4.92	7.44	0.326291	-5.01529	-7.5841
2013-07-31 23:29:15	4.95	7.47	0.333235	-5.04587	-7.61468
2013-07-31 23:39:15	4.98	7.5	0.34018	-5.07645	-7.64526	2013-07-31 23:39:15
2013-07-31 23:49:15	5	7.52	0.347124	-5.09684	-7.66565
2013-07-31 23:59:15	5.03	7.54	0.354068	-5.12742	-7.68603
2013-08-01 00:09:15	5	7.52	0.361013	-5.09684	-7.66565
2013-08-01 00:19:15	5.05	7.58	0.367957	-5.14781	-7.72681
2013-08-01 00:29:15	5.08	7.59	0.374902	-5.17839	-7.737
2013-08-01 00:39:15	5.09	7.61	0.381846	-5.18858	-7.75739	2013-08-01 00:39:15
2013-08-01 00:49:15	5.12	7.66	0.388791	-5.21916	-7.80836
2013-08-01 00:59:15	5.14	7.67	0.395735	-5.23955	-7.81855
2013-08-01 01:09:15	5.15	7.67	0.40268	-5.24975	-7.81855
2013-08-01 01:19:15	5.17	7.7	0.409624	-5.27013	-7.84913
2013-08-01 01:29:15	5.17	7.68	0.416568	-5.27013	-7.82875
2013-08-01 01:39:15	5.2	7.72	0.423513	-5.30071	-7.86952	2013-08-01 01:39:15
2013-08-01 01:49:15	5.22	7.74	0.430457	-5.3211	-7.88991
2013-08-01 01:59:15	5.25	7.76	0.437402	-5.35168	-7.9103
2013-08-01 02:09:15	5.23	7.74	0.444346	-5.33129	-7.88991
2013-08-01 02:19:15	5.26	7.78	0.451291	-5.36188	-7.93068
2013-08-01 02:29:15	5.26	7.77	0.458235	-5.36188	-7.92049
2013-08-01 02:39:15	5.28	7.8	0.46518	-5.38226	-7.95107	2013-08-01 02:39:15
2013-08-01 02:49:15	5.31	7.83	0.472124	-5.41284	-7.98165
2013-08-01 02:59:15	5.33	7.84	0.479068	-5.43323	-7.99185
2013-08-01 03:09:15	5.26	7.78	0.486013	-5.36188	-7.93068
2013-08-01 03:19:15	5.31	7.82	0.492957	-5.41284	-7.97146
2013-08-01 03:29:15	5.33	7.84	0.499902	-5.43323	-7.99185
2013-08-01 03:39:15	5.36	7.87	0.506846	-5.46381	-8.02243	2013-08-01 03:39:15
2013-08-01 03:49:15	5.37	7.89	0.513791	-5.47401	-8.04281
2013-08-01 03:59:15	5.4	7.92	0.520735	-5.50459	-8.07339
2013-08-01 04:09:15	5.41	7.92	0.52768	-5.51478	-8.07339
2013-08-01 04:19:15	5.41	7.93	0.534624	-5.51478	-8.08359
2013-08-01 04:29:15	5.44	7.96	0.541568	-5.54536	-8.11417
2013-08-01 04:39:15	5.43	7.94	0.548513	-5.53517	-8.09378	2013-08-01 04:39:15
2013-08-01 04:49:15	5.44	7.97	0.555457	-5.54536	-8.12436
2013-08-01 04:59:15	5.45	7.97	0.562402	-5.55556	-8.12436
2013-08-01 05:09:15	5.48	8	0.569346	-5.58614	-8.15494
2013-08-01 05:19:15	5.49	8	0.576291	-5.59633	-8.15494
2013-08-01 05:29:15	5.51	8.03	0.583235	-5.61672	-8.18552
2013-08-01 05:39:15	5.52	8.04	0.59018	-5.62691	-8.19572	2013-08-01 05:39:15
2013-08-01 05:49:15	5.53	8.05	0.597124	-5.6371	-8.20591
2013-08-01 05:59:15	5.55	8.07	0.604068	-5.65749	-8.2263
2013-08-01 06:09:15	5.55	8.07	0.611013	-5.65749	-8.2263
2013-08-01 06:19:15	5.56	8.08	0.617957	-5.66769	-8.23649
2013-08-01 06:29:15	5.58	8.1	0.624902	-5.68807	-8.25688
2013-08-01 06:49:15	5.61	8.13	0.638791	-5.71865	-8.28746	2013-08-01 06:49:15
2013-08-01 06:59:15	5.61	8.13	0.645735	-5.71865	-8.28746
2013-08-01 07:09:15	5.62	8.14	0.65268	-5.72885	-8.29766
2013-08-01 07:19:15	5.65	8.17	0.659624	-5.75943	-8.32824
2013-08-01 07:29:15	5.64	8.16	0.666568	-5.74924	-8.31804
2013-08-01 07:39:15	5.6	8.1	0.673513	-5.70846	-8.25688
2013-08-01 07:49:15	5.65	8.15	0.680457	-5.75943	-8.30785	2013-08-01 07:49:15
2013-08-01 07:59:15	5.7	8.19	0.687402	-5.8104	-8.34862
2013-08-01 08:09:15	5.74	8.24	0.694346	-5.85117	-8.39959
2013-08-01 08:19:15	5.76	8.27	0.701291	-5.87156	-8.43017
2013-08-01 08:29:15	5.76	8.26	0.708235	-5.87156	-8.41998
2013-08-01 08:39:15	5.8	8.3	0.71518	-5.91233	-8.46075
2013-08-01 08:49:15	5.78	8.27	0.722124	-5.89195	-8.43017	2013-08-01 08:49:15
2013-08-01 08:59:15	5.81	8.31	0.729068	-5.92253	-8.47095
2013-08-01 09:09:15	5.85	8.35	0.736013	-5.9633	-8.51172
2013-08-01 09:19:15	5.86	8.36	0.742957	-5.9735	-8.52192
2013-08-01 09:29:15	5.88	8.38	0.749902	-5.99388	-8.5423
2013-08-01 09:39:15	5.91	8.39	0.756846	-6.02446	-8.5525
2013-08-01 09:49:15	5.88	8.38	0.763791	-5.99388	-8.5423	2013-08-01 09:49:15
2013-08-01 09:59:15	5.92	8.41	0.770735	-6.03466	-8.57288
2013-08-01 10:09:15	5.93	8.42	0.77768	-6.04485	-8.58308
2013-08-01 10:19:15	5.89	8.39	0.784624	-6.00408	-8.5525
2013-08-01 10:29:15	5.9	8.39	0.791568	-6.01427	-8.5525
2013-08-01 10:39:15	5.94	8.45	0.798513	-6.05505	-8.61366
2013-08-01 10:49:15	5.95	8.45	0.805457	-6.06524	-8.61366	2013-08-01 10:49:15
2013-08-01 10:59:15	5.98	8.48	0.812402	-6.09582	-8.64424
2013-08-01 11:09:15	5.78	8.3	0.819346	-5.89195	-8.46075
2013-08-01 11:19:15	5.86	8.37	0.826291	-5.9735	-8.53211
2013-08-01 11:39:15	5.94	8.45	0.84018	-6.05505	-8.61366
2013-08-01 11:49:15	5.98	8.5	0.847124	-6.09582	-8.66463
2013-08-01 11:59:15	6.01	8.52	0.854068	-6.1264	-8.68502	2013-08-01 11:59:15
2013-08-01 12:09:15	6.05	8.55	0.861013	-6.16718	-8.7156
2013-08-01 12:19:15	6.05	8.53	0.867957	-6.16718	-8.69521
2013-08-01 12:29:15	6.05	8.56	0.874902	-6.16718	-8.72579
2013-08-01 12:39:15	6.08	8.59	0.881846	-6.19776	-8.75637
2013-08-01 12:49:15	6.11	8.61	0.888791	-6.22834	-8.77676
2013-08-01 12:59:15	6.12	8.62	0.895735	-6.23853	-8.78695	2013-08-01 12:59:15
2013-08-01 13:09:15	6.13	8.63	0.90268	-6.24873	-8.79715
2013-08-01 13:19:15	6.13	8.64	0.909624	-6.24873	-8.80734
2013-08-01 13:29:15	6.17	8.67	0.916568	-6.2895	-8.83792
2013-08-01 13:39:15	6.17	8.68	0.923513	-6.2895	-8.84811
2013-08-01 13:59:15	6.1	8.6	0.937402	-6.21814	-8.76656
2013-08-01 14:09:15	6.16	8.66	0.944346	-6.27931	-8.82773	2013-08-01 14:09:15
2013-08-01 14:19:15	6.17	8.68	0.951291	-6.2895	-8.84811
2013-08-01 14:29:15	6.2	8.72	0.958235	-6.32008	-8.88889
2013-08-01 14:39:15	6.23	8.74	0.96518	-6.35066	-8.90928
2013-08-01 14:49:15	6.25	8.75	0.972124	-6.37105	-8.91947
2013-08-01 14:59:15	6.27	8.77	0.979068	-6.39144	-8.93986
2013-08-01 15:09:15	6.27	8.78	0.986013	-6.39144	-8.95005	2013-08-01 15:09:15
2013-08-01 15:19:15	6.29	8.78	0.992957	-6.41182	-8.95005
2013-08-01 15:29:15	6.12	8.64	0.999902	-6.23853	-8.80734
2013-08-01 15:39:15	6.19	8.7	1.00685	-6.30989	-8.8685
2013-08-01 15:49:15	6.24	8.75	1.01379	-6.36086	-8.91947
2013-08-01 15:59:15	6.29	8.8	1.02074	-6.41182	-8.97044
2013-08-01 16:09:15	6.31	8.82	1.02768	-6.43221	-8.99083	2013-08-01 16:09:15
2013-08-01 16:19:15	6.34	8.85	1.03462	-6.46279	-9.02141
2013-08-01 16:29:15	6.29	8.8	1.04157	-6.41182	-8.97044
2013-08-01 16:39:15	6.3	8.8	1.04851	-6.42202	-8.97044
2013-08-01 16:49:15	6.33	8.84	1.05546	-6.4526	-9.01121
2013-08-01 16:59:15	6.36	8.87	1.0624	-6.48318	-9.04179
2013-08-01 17:09:15	6.39	8.9	1.06935	-6.51376	-9.07238	2013-08-01 17:09:15
2013-08-01 17:19:15	6.42	8.92	1.07629	-6.54434	-9.09276
2013-08-01 17:29:15	6.43	8.93	1.08324	-6.55454	-9.10296
2013-08-01 17:39:15	6.47	8.98	1.09018	-6.59531	-9.15392
2013-08-01 17:49:15	6.48	8.98	1.09712	-6.6055	-9.15392
2013-08-01 17:59:15	6.4	8.9	1.10407	-6.52396	-9.07238
2013-08-01 18:09:15	6.41	8.92	1.11101	-6.53415	-9.09276	2013-08-01 18:09:15
2013-08-01 18:19:15	6.47	8.97	1.11796	-6.59531	-9.14373
2013-08-01 18:29:15	6.49	8.99	1.1249	-6.6157	-9.16412
2013-08-01 18:39:15	6.5	9.01	1.13185	-6.62589	-9.18451
2013-08-01 18:49:15	6.53	9.03	1.13879	-6.65647	-9.20489
2013-08-01 18:59:15	6.53	9.05	1.14574	-6.65647	-9.22528
2013-08-01 19:09:15	6.55	9.06	1.15268	-6.67686	-9.23547	2013-08-01 19:09:15
2013-08-01 19:19:15	6.57	9.07	1.15962	-6.69725	-9.24567
2013-08-01 19:29:15	6.6	9.11	1.16657	-6.72783	-9.28644
2013-08-01 19:39:15	6.62	9.12	1.17351	-6.74822	-9.29664
2013-08-01 19:49:15	6.64	9.14	1.18046	-6.7686	-9.31702
2013-08-01 19:59:15	6.5	9	1.1874	-6.62589	-9.17431
2013-08-01 20:09:15	6.53	9.03	1.19435	-6.65647	-9.20489	2013-08-01 20:09:15
2013-08-01 20:19:15	6.23	8.73	1.20129	-6.35066	-8.89908
2013-08-01 20:29:15	6.32	8.81	1.20824	-6.44241	-8.98063
2013-08-01 20:39:15	6.37	8.87	1.21518	-6.49337	-9.04179
2013-08-01 20:49:15	6.41	8.91	1.22212	-6.53415	-9.08257
2013-08-01 20:59:15	6.47	8.97	1.22907	-6.59531	-9.14373
2013-08-01 21:09:15	6.37	8.91	1.23601	-6.49337	-9.08257	2013-08-01 21:09:15
2013-08-01 21:19:15	6.52	9.02	1.24296	-6.64628	-9.1947
2013-08-01 21:29:15	6.54	9.02	1.2499	-6.66667	-9.1947
2013-08-01 21:39:15	6.55	9.04	1.25685	-6.67686	-9.21509
2013-08-01 21:49:15	6.55	9.03	1.26379	-6.67686	-9.20489
2013-08-01 21:59:15	6.57	9.05	1.27074	-6.69725	-9.22528
2013-08-01 22:09:15	6.56	9.05	1.27768	-6.68705	-9.22528	2013-08-01 22:09:15
2013-08-01 22:19:15	6.58	9.06	1.28462	-6.70744	-9.23547
2013-08-01 22:29:15	6.61	9.09	1.29157	-6.73802	-9.26606
2013-08-01 22:39:15	6.62	9.1	1.29851	-6.74822	-9.27625
2013-08-01 22:49:15	6.64	9.12	1.30546	-6.7686	-9.29664
2013-08-01 22:59:15	6.64	9.12	1.3124	-6.7686	-9.29664
2013-08-01 23:09:15	6.66	9.15	1.31935	-6.78899	-9.32722	2013-08-01 23:09:15
2013-08-01 23:19:15	6.67	9.16	1.32629	-6.79918	-9.33741
2013-08-01 23:29:15	6.7	9.19	1.33324	-6.82977	-9.36799
2013-08-01 23:39:15	6.71	9.2	1.34018	-6.83996	-9.37819
2013-08-01 23:49:15	6.73	9.23	1.34712	-6.86035	-9.40877
2013-08-01 23:59:15	6.75	9.25	1.35407	-6.88073	-9.42915
2013-08-02 00:09:15	6.76	9.25	1.36101	-6.89093	-9.42915	2013-08-02 00:09:15
2013-08-02 00:19:15	6.59	9.07	1.36796	-6.71764	-9.24567
2013-08-02 00:29:15	6.6	9.09	1.3749	-6.72783	-9.26606
2013-08-02 00:39:15	6.66	9.15	1.38185	-6.78899	-9.32722
2013-08-02 00:49:15	6.69	9.18	1.38879	-6.81957	-9.3578
2013-08-02 01:09:15	6.76	9.25	1.40268	-6.89093	-9.42915
2013-08-02 01:19:15	6.78	9.27	1.40962	-6.91131	-9.44954	2013-08-02 01:19:15
2013-08-02 01:29:15	6.8	9.28	1.41657	-6.9317	-9.45973
2013-08-02 01:39:15	6.81	9.29	1.42351	-6.9419	-9.46993
2013-08-02 01:49:15	6.81	9.31	1.43046	-6.9419	-9.49032
2013-08-02 01:59:15	6.84	9.33	1.4374	-6.97248	-9.5107
2013-08-02 02:09:15	6.85	9.35	1.44435	-6.98267	-9.53109
2013-08-02 02:29:15	6.89	9.37	1.45824	-7.02345	-9.55148	2013-08-02 02:29:15
2013-08-02 02:39:15	6.91	9.4	1.46518	-7.04383	-9.58206
2013-08-02 02:49:15	6.89	9.38	1.47212	-7.02345	-9.56167
2013-08-02 02:59:15	6.86	9.35	1.47907	-6.99286	-9.53109
2013-08-02 03:09:15	6.88	9.37	1.48601	-7.01325	-9.55148
2013-08-02 03:19:15	6.9	9.39	1.49296	-7.03364	-9.57187
2013-08-02 03:29:15	6.9	9.39	1.4999	-7.03364	-9.57187	2013-08-02 03:29:15
2013-08-02 03:39:15	6.93	9.42	1.50685	-7.06422	-9.60245
2013-08-02 03:49:15	6.93	9.42	1.51379	-7.06422	-9.60245
2013-08-02 03:59:15	6.95	9.44	1.52074	-7.08461	-9.62283
2013-08-02 04:09:15	6.96	9.45	1.52768	-7.0948	-9.63303
2013-08-02 04:19:15	6.98	9.47	1.53462	-7.11519	-9.65341
2013-08-02 04:29:15	6.98	9.47	1.54157	-7.11519	-9.65341	2013-08-02 04:29:15
2013-08-02 04:39:15	6.92	9.41	1.54851	-7.05403	-9.59225
2013-08-02 04:49:15	6.94	9.43	1.55546	-7.07441	-9.61264
2013-08-02 04:59:15	6.98	9.47	1.5624	-7.11519	-9.65341
2013-08-02 05:09:15	6.99	9.48	1.56935	-7.12538	-9.66361
2013-08-02 05:19:15	7.02	9.5	1.57629	-7.15596	-9.684
2013-08-02 05:29:15	7.02	9.51	1.58324	-7.15596	-9.69419	2013-08-02 05:29:15
2013-08-02 05:39:15	7.03	9.51	1.59018	-7.16616	-9.69419
2013-08-02 05:49:15	7.05	9.54	1.59712	-7.18654	-9.72477
2013-08-02 05:59:15	7.04	9.53	1.60407	-7.17635	-9.71458
2013-08-02 06:09:15	7.07	9.56	1.61101	-7.20693	-9.74516
2013-08-02 06:19:15	7.05	9.54	1.61796	-7.18654	-9.72477
2013-08-02 06:29:15	7.07	9.56	1.6249	-7.20693	-9.74516	2013-08-02 06:29:15
2013-08-02 06:39:15	7.08	9.57	1.63185	-7.21713	-9.75535
2013-08-02 06:49:15	7.09	9.58	1.63879	-7.22732	-9.76555
2013-08-02 06:59:15	7.11	9.6	1.64574	-7.24771	-9.78593
2013-08-02 07:09:15	7.12	9.61	1.65268	-7.2579	-9.79613
2013-08-02 07:19:15	7.14	9.62	1.65962	-7.27829	-9.80632
2013-08-02 07:29:15	7.14	9.63	1.66657	-7.27829	-9.81651	2013-08-02 07:29:15
2013-08-02 07:39:15	7.15	9.65	1.67351	-7.28848	-9.8369
2013-08-02 07:49:15	7.16	9.65	1.68046	-7.29867	-9.8369
2013-08-02 07:59:15	7.16	9.65	1.6874	-7.29867	-9.8369
2013-08-02 08:09:15	7.17	9.66	1.69435	-7.30887	-9.84709
2013-08-02 08:19:15	7.18	9.67	1.70129	-7.31906	-9.85729
2013-08-02 08:29:15	7.17	9.66	1.70824	-7.30887	-9.84709	2013-08-02 08:29:15
2013-08-02 08:39:15	6.92	9.42	1.71518	-7.05403	-9.60245
2013-08-02 08:49:15	6.97	9.47	1.72212	-7.10499	-9.65341
2013-08-02 08:59:15	7.02	9.51	1.72907	-7.15596	-9.69419
2013-08-02 09:09:15	7.05	9.55	1.73601	-7.18654	-9.73496
2013-08-02 09:19:15	7.08	9.58	1.74296	-7.21713	-9.76555
2013-08-02 09:29:15	7.12	9.62	1.7499	-7.2579	-9.80632	2013-08-02 09:29:15
2013-08-02 09:39:15	7.16	9.65	1.75685	-7.29867	-9.8369
2013-08-02 09:49:15	7.18	9.67	1.76379	-7.31906	-9.85729
2013-08-02 09:59:15	7.19	9.69	1.77074	-7.32926	-9.87768
2013-08-02 10:09:15	7.21	9.71	1.77768	-7.34964	-9.89806
2013-08-02 10:19:15	7.22	9.72	1.78462	-7.35984	-9.90826
2013-08-02 10:29:15	7.24	9.72	1.79157	-7.38022	-9.90826	2013-08-02 10:29:15
2013-08-02 10:39:15	7.24	9.73	1.79851	-7.38022	-9.91845
2013-08-02 10:49:15	7.26	9.76	1.80546	-7.40061	-9.94903
2013-08-02 10:59:15	7.27	9.76	1.8124	-7.41081	-9.94903
2013-08-02 11:09:15	7.28	9.77	1.81935	-7.421	-9.95923
2013-08-02 11:19:15	7.3	9.79	1.82629	-7.44139	-9.97961
2013-08-02 11:29:15	7.31	9.8	1.83324	-7.45158	-9.98981	2013-08-02 11:29:15
2013-08-02 11:39:15	7.31	9.8	1.84018	-7.45158	-9.98981
2013-08-02 11:49:15	7.32	9.81	1.84712	-7.46177	-10
2013-08-02 11:59:15	7.33	9.82	1.85407	-7.47197	-10.0102
2013-08-02 12:09:15	7.35	9.84	1.86101	-7.49235	-10.0306
2013-08-02 12:19:15	7.35	9.85	1.86796	-7.49235	-10.0408
2013-08-02 12:29:15	7.37	9.86	1.8749	-7.51274	-10.051	2013-08-02 12:29:15
2013-08-02 12:39:15	7.39	9.87	1.88185	-7.53313	-10.0612
2013-08-02 12:49:15	7.29	9.78	1.88879	-7.43119	-9.96942
2013-08-02 12:59:15	7.35	9.84	1.89574	-7.49235	-10.0306
2013-08-02 13:09:15	7.4	9.88	1.90268	-7.54332	-10.0714
2013-08-02 13:19:15	7.41	9.9	1.90962	-7.55352	-10.0917
2013-08-02 13:29:15	7.45	9.93	1.91657	-7.59429	-10.1223	2013-08-02 13:29:15
2013-08-02 13:39:15	7.47	9.95	1.92351	-7.61468	-10.1427
2013-08-02 13:49:15	7.5	9.98	1.93046	-7.64526	-10.1733
2013-08-02 13:59:15	7.48	9.96	1.9374	-7.62487	-10.1529
2013-08-02 14:09:15	7.48	9.96	1.94435	-7.62487	-10.1529
2013-08-02 14:19:15	7.52	10.01	1.95129	-7.66565	-10.2039
2013-08-02 14:29:15	7.54	10.02	1.95824	-7.68603	-10.2141	2013-08-02 14:29:15
2013-08-02 14:39:15	7.55	10.04	1.96518	-7.69623	-10.2345
2013-08-02 14:49:15	7.55	10.04	1.97212	-7.69623	-10.2345
2013-08-02 14:59:15	7.59	10.07	1.97907	-7.737	-10.265
2013-08-02 15:09:15	7.6	10.08	1.98601	-7.7472	-10.2752
2013-08-02 15:19:15	7.62	10.1	1.99296	-7.76758	-10.2956
2013-08-02 15:29:15	7.65	10.13	1.9999	-7.79817	-10.3262	2013-08-02 15:29:15
2013-08-02 15:39:15	7.66	10.14	2.00685	-7.80836	-10.3364
2013-08-02 15:49:15	7.67	10.15	2.01379	-7.81855	-10.3466
2013-08-02 15:59:15	7.69	10.17	2.02074	-7.83894	-10.367
2013-08-02 16:09:15	7.7	10.18	2.02768	-7.84913	-10.3772
2013-08-02 16:19:15	7.72	10.2	2.03462	-7.86952	-10.3976
2013-08-02 16:29:15	7.74	10.22	2.04157	-7.88991	-10.4179	2013-08-02 16:29:15
2013-08-02 16:39:15	7.74	10.23	2.04851	-7.88991	-10.4281
2013-08-02 16:49:15	7.76	10.24	2.05546	-7.9103	-10.4383
2013-08-02 16:59:15	7.77	10.25	2.0624	-7.92049	-10.4485
2013-08-02 17:09:15	7.8	10.28	2.06935	-7.95107	-10.4791
2013-08-02 17:19:15	7.79	10.27	2.07629	-7.94088	-10.4689
2013-08-02 17:29:15	7.81	10.29	2.08324	-7.96126	-10.4893	2013-08-02 17:29:15
2013-08-02 17:39:15	7.84	10.32	2.09018	-7.99185	-10.5199
2013-08-02 17:49:15	7.85	10.34	2.09712	-8.00204	-10.5403
2013-08-02 17:59:15	7.87	10.35	2.10407	-8.02243	-10.5505
2013-08-02 18:09:15	7.89	10.37	2.11101	-8.04281	-10.5708
2013-08-02 18:19:15	7.91	10.38	2.11796	-8.0632	-10.581
2013-08-02 18:29:15	7.94	10.42	2.1249	-8.09378	-10.6218	2013-08-02 18:29:15
2013-08-02 18:39:15	7.96	10.44	2.13185	-8.11417	-10.6422
2013-08-02 18:49:15	7.99	10.46	2.13879	-8.14475	-10.6626
2013-08-02 18:59:15	8.01	10.48	2.14574	-8.16514	-10.683
2013-08-02 19:09:15	8.02	10.5	2.15268	-8.17533	-10.7034
2013-08-02 19:19:15	8.03	10.51	2.15962	-8.18552	-10.7136
2013-08-02 19:29:15	8.05	10.52	2.16657	-8.20591	-10.7238	2013-08-02 19:29:15
2013-08-02 19:39:15	8.07	10.54	2.17351	-8.2263	-10.7441
2013-08-02 19:49:15	7.48	10	2.18046	-7.62487	-10.1937
2013-08-02 19:59:15	8	10.49	2.1874	-8.15494	-10.6932
2013-08-02 20:09:15	8.05	10.51	2.19435	-8.20591	-10.7136
2013-08-02 20:19:15	8.08	10.55	2.20129	-8.23649	-10.7543
2013-08-02 20:29:15	8.1	10.56	2.20824	-8.25688	-10.7645	2013-08-02 20:29:15
2013-08-02 20:39:15	8.13	10.59	2.21518	-8.28746	-10.7951
2013-08-02 20:49:15	8.15	10.61	2.22212	-8.30785	-10.8155
2013-08-02 20:59:15	8.18	10.63	2.22907	-8.33843	-10.8359
2013-08-02 21:09:15	8.2	10.65	2.23601	-8.35882	-10.8563
2013-08-02 21:29:15	8.25	10.7	2.2499	-8.40979	-10.9072
2013-08-02 21:39:15	8.26	10.73	2.25685	-8.41998	-10.9378	2013-08-02 21:39:15
2013-08-02 21:59:15	8.28	10.76	2.27074	-8.44037	-10.9684
2013-08-02 22:09:15	8.3	10.78	2.27768	-8.46075	-10.9888
2013-08-02 22:19:15	8.34	10.8	2.28462	-8.50153	-11.0092
2013-08-02 22:29:15	8.33	10.81	2.29157	-8.49134	-11.0194
2013-08-02 22:39:15	8.35	10.82	2.29851	-8.51172	-11.0296
2013-08-02 22:49:15	8.37	10.84	2.30546	-8.53211	-11.0499	2013-08-02 22:49:15
2013-08-02 22:59:15	8.37	10.84	2.3124	-8.53211	-11.0499
2013-08-02 23:09:15	8.39	10.86	2.31935	-8.5525	-11.0703
2013-08-02 23:19:15	8.4	10.87	2.32629	-8.56269	-11.0805
2013-08-02 23:29:15	8.4	10.87	2.33324	-8.56269	-11.0805
2013-08-02 23:39:15	8.43	10.89	2.34018	-8.59327	-11.1009
2013-08-02 23:49:15	8.43	10.9	2.34712	-8.59327	-11.1111	2013-08-02 23:49:15
2013-08-02 23:59:15	8.44	10.92	2.35407	-8.60347	-11.1315
2013-08-03 00:09:15	8.45	10.93	2.36101	-8.61366	-11.1417
2013-08-03 00:19:15	8.45	10.92	2.36796	-8.61366	-11.1315
2013-08-03 00:29:15	8.47	10.95	2.3749	-8.63405	-11.1621
2013-08-03 00:39:15	8.49	10.96	2.38185	-8.65443	-11.1723
2013-08-03 00:49:15	8.51	10.98	2.38879	-8.67482	-11.1927	2013-08-03 00:49:15
2013-08-03 00:59:15	8.5	10.99	2.39574	-8.66463	-11.2029
2013-08-03 01:09:15	8.48	10.95	2.40268	-8.64424	-11.1621
2013-08-03 01:19:15	8.49	10.96	2.40962	-8.65443	-11.1723
2013-08-03 01:29:15	8.49	10.97	2.41657	-8.65443	-11.1825
2013-08-03 01:39:15	8.51	10.98	2.42351	-8.67482	-11.1927
2013-08-03 01:49:15	8.52	10.99	2.43046	-8.68502	-11.2029	2013-08-03 01:49:15
2013-08-03 01:59:15	8.52	11.01	2.4374	-8.68502	-11.2232
2013-08-03 02:09:15	8.54	11.02	2.44435	-8.7054	-11.2334
2013-08-03 02:19:15	8.56	11.03	2.45129	-8.72579	-11.2436
2013-08-03 02:29:15	8.57	11.04	2.45824	-8.73598	-11.2538
2013-08-03 02:39:15	8.57	11.05	2.46518	-8.73598	-11.264
2013-08-03 02:49:15	8.58	11.06	2.47212	-8.74618	-11.2742	2013-08-03 02:49:15
2013-08-03 02:59:15	8.56	11.03	2.47907	-8.72579	-11.2436
2013-08-03 03:09:15	8.59	11.06	2.48601	-8.75637	-11.2742
2013-08-03 03:19:15	8.6	11.08	2.49296	-8.76656	-11.2946
2013-08-03 03:29:15	8.61	11.08	2.4999	-8.77676	-11.2946
2013-08-03 03:39:15	8.61	11.09	2.50685	-8.77676	-11.3048
2013-08-03 03:49:15	8.63	11.1	2.51379	-8.79715	-11.315	2013-08-03 03:49:15
2013-08-03 03:59:15	8.63	11.11	2.52074	-8.79715	-11.3252
2013-08-03 04:09:15	8.65	11.12	2.52768	-8.81753	-11.3354
2013-08-03 04:19:15	8.66	11.12	2.53462	-8.82773	-11.3354
2013-08-03 04:29:15	8.64	11.12	2.54157	-8.80734	-11.3354
2013-08-03 04:39:15	8.66	11.14	2.54851	-8.82773	-11.3558
2013-08-03 04:49:15	8.69	11.16	2.55546	-8.85831	-11.3761	2013-08-03 04:49:15
2013-08-03 04:59:15	8.69	11.17	2.5624	-8.85831	-11.3863
2013-08-03 05:09:15	8.7	11.18	2.56935	-8.8685	-11.3965
2013-08-03 05:19:15	8.72	11.19	2.57629	-8.88889	-11.4067
2013-08-03 05:29:15	8.72	11.19	2.58324	-8.88889	-11.4067
2013-08-03 05:39:15	8.74	11.22	2.59018	-8.90928	-11.4373
2013-08-03 05:49:15	8.74	11.22	2.59712	-8.90928	-11.4373	2013-08-03 05:49:15
2013-08-03 05:59:15	8.75	11.23	2.60407	-8.91947	-11.4475
2013-08-03 06:09:15	8.77	11.25	2.61101	-8.93986	-11.4679
2013-08-03 06:19:15	8.77	11.25	2.61796	-8.93986	-11.4679
2013-08-03 06:29:15	8.79	11.27	2.6249	-8.96024	-11.4883
2013-08-03 06:39:15	8.8	11.27	2.63185	-8.97044	-11.4883
2013-08-03 06:49:15	8.81	11.28	2.63879	-8.98063	-11.4985	2013-08-03 06:49:15
2013-08-03 06:59:15	8.83	11.3	2.64574	-9.00102	-11.5189
2013-08-03 07:09:15	8.67	11.16	2.65268	-8.83792	-11.3761
2013-08-03 07:19:15	8.76	11.25	2.65962	-8.92966	-11.4679
2013-08-03 07:29:15	8.8	11.28	2.66657	-8.97044	-11.4985
2013-08-03 07:39:15	8.85	11.33	2.67351	-9.02141	-11.5494
2013-08-03 07:49:15	8.89	11.36	2.68046	-9.06218	-11.58	2013-08-03 07:49:15
2013-08-03 07:59:15	8.9	11.38	2.6874	-9.07238	-11.6004
2013-08-03 08:09:15	8.9	11.38	2.69435	-9.07238	-11.6004
2013-08-03 08:19:15	8.94	11.42	2.70129	-9.11315	-11.6412
2013-08-03 08:29:15	8.94	11.42	2.70824	-9.11315	-11.6412
2013-08-03 08:39:15	8.97	11.44	2.71518	-9.14373	-11.6616
2013-08-03 08:49:15	8.99	11.46	2.72212	-9.16412	-11.682	2013-08-03 08:49:15
2013-08-03 08:59:15	8.99	11.47	2.72907	-9.16412	-11.6922
2013-08-03 09:09:15	8.99	11.47	2.73601	-9.16412	-11.6922
2013-08-03 09:19:15	8.99	11.47	2.74296	-9.16412	-11.6922
2013-08-03 09:29:15	9.02	11.5	2.7499	-9.1947	-11.7227
2013-08-03 09:39:15	9.02	11.5	2.75685	-9.1947	-11.7227
2013-08-03 09:49:15	9.05	11.52	2.76379	-9.22528	-11.7431	2013-08-03 09:49:15
2013-08-03 09:59:15	9.04	11.52	2.77074	-9.21509	-11.7431
2013-08-03 10:09:15	9.05	11.53	2.77768	-9.22528	-11.7533
2013-08-03 10:19:15	9.05	11.53	2.78462	-9.22528	-11.7533
2013-08-03 10:29:15	9.08	11.54	2.79157	-9.25586	-11.7635
2013-08-03 10:39:15	9.09	11.56	2.79851	-9.26606	-11.7839
2013-08-03 10:49:15	9.09	11.57	2.80546	-9.26606	-11.7941	2013-08-03 10:49:15
2013-08-03 10:59:15	9.13	11.6	2.8124	-9.30683	-11.8247
2013-08-03 11:09:15	9.13	11.59	2.81935	-9.30683	-11.8145
2013-08-03 11:19:15	9.14	11.61	2.82629	-9.31702	-11.8349
2013-08-03 11:29:15	9.13	11.61	2.83324	-9.30683	-11.8349
2013-08-03 11:39:15	9.15	11.62	2.84018	-9.32722	-11.8451
2013-08-03 11:49:15	9.17	11.63	2.84712	-9.3476	-11.8552	2013-08-03 11:49:15
2013-08-03 11:59:15	9.18	11.65	2.85407	-9.3578	-11.8756
2013-08-03 12:09:15	9.19	11.66	2.86101	-9.36799	-11.8858
2013-08-03 12:19:15	9.2	11.67	2.86796	-9.37819	-11.896
2013-08-03 12:29:15	9.22	11.69	2.8749	-9.39857	-11.9164
2013-08-03 12:39:15	9.24	11.71	2.88185	-9.41896	-11.9368
2013-08-03 12:49:15	9.23	11.71	2.88879	-9.40877	-11.9368	2013-08-03 12:49:15
2013-08-03 12:59:15	9.24	11.71	2.89574	-9.41896	-11.9368
2013-08-03 13:09:15	9.26	11.73	2.90268	-9.43935	-11.9572
2013-08-03 13:19:15	9.29	11.76	2.90962	-9.46993	-11.9878
2013-08-03 13:29:15	9.3	11.78	2.91657	-9.48012	-12.0082
2013-08-03 13:39:15	9.3	11.77	2.92351	-9.48012	-11.998
2013-08-03 13:49:15	9.31	11.79	2.93046	-9.49032	-12.0183	2013-08-03 13:49:15
2013-08-03 13:59:15	9.27	11.74	2.9374	-9.44954	-11.9674
2013-08-03 14:09:15	9.28	11.76	2.94435	-9.45973	-11.9878
2013-08-03 14:19:15	9.3	11.76	2.95129	-9.48012	-11.9878
2013-08-03 14:29:15	9.32	11.78	2.95824	-9.50051	-12.0082
2013-08-03 14:39:15	9.33	11.79	2.96518	-9.5107	-12.0183
2013-08-03 14:49:15	9.35	11.81	2.97212	-9.53109	-12.0387	2013-08-03 14:49:15
2013-08-03 14:59:15	9.36	11.83	2.97907	-9.54128	-12.0591
2013-08-03 15:09:15	9.72	12.35	2.98601	-9.90826	-12.5892
2013-08-03 15:19:15	9.25	11.73	2.99296	-9.42915	-11.9572
2013-08-03 15:29:15	9.31	11.78	2.9999	-9.49032	-12.0082
2013-08-03 15:39:15	9.34	11.81	3.00685	-9.5209	-12.0387
2013-08-03 15:49:15	9.4	11.87	3.01379	-9.58206	-12.0999	2013-08-03 15:49:15
2013-08-03 15:59:15	9.42	11.9	3.02074	-9.60245	-12.1305
2013-08-03 16:09:15	9.45	11.91	3.02768	-9.63303	-12.1407
2013-08-03 16:19:15	9.48	11.94	3.03462	-9.66361	-12.1713
2013-08-03 16:29:15	9.5	11.96	3.04157	-9.684	-12.1916
2013-08-03 16:39:15	9.51	11.98	3.04851	-9.69419	-12.212
2013-08-03 16:49:15	9.52	11.99	3.05546	-9.70438	-12.2222	2013-08-03 16:49:15
2013-08-03 16:59:15	9.55	12.01	3.0624	-9.73496	-12.2426
2013-08-03 17:09:15	9.55	12.02	3.06935	-9.73496	-12.2528
2013-08-03 17:19:15	9.56	12.03	3.07629	-9.74516	-12.263
2013-08-03 17:29:15	9.59	12.05	3.08324	-9.77574	-12.2834
2013-08-03 17:39:15	9.59	12.06	3.09018	-9.77574	-12.2936
2013-08-03 17:49:15	9.6	12.08	3.09712	-9.78593	-12.314	2013-08-03 17:49:15
2013-08-03 17:59:15	9.62	12.08	3.10407	-9.80632	-12.314
2013-08-03 18:09:15	9.63	12.1	3.11101	-9.81651	-12.3344
2013-08-03 18:19:15	9.64	12.11	3.11796	-9.82671	-12.3445
2013-08-03 18:29:15	9.65	12.11	3.1249	-9.8369	-12.3445
2013-08-03 18:39:15	9.67	12.13	3.13185	-9.85729	-12.3649
2013-08-03 18:49:15	9.67	12.14	3.13879	-9.85729	-12.3751	2013-08-03 18:49:15
2013-08-03 18:59:15	9.69	12.16	3.14574	-9.87768	-12.3955
2013-08-03 19:09:15	9.69	12.17	3.15268	-9.87768	-12.4057
2013-08-03 19:19:15	9.71	12.17	3.15962	-9.89806	-12.4057
2013-08-03 19:39:15	9.73	12.2	3.17351	-9.91845	-12.4363
2013-08-03 19:49:15	9.74	12.21	3.18046	-9.92864	-12.4465
2013-08-03 19:59:15	9.73	12.2	3.1874	-9.91845	-12.4363	2013-08-03 19:59:15
2013-08-03 20:09:15	9.75	12.22	3.19435	-9.93884	-12.4567
2013-08-03 20:19:15	9.75	12.22	3.20129	-9.93884	-12.4567
2013-08-03 20:29:15	9.76	12.24	3.20824	-9.94903	-12.4771
2013-08-03 20:39:15	9.79	12.25	3.21518	-9.97961	-12.4873
2013-08-03 20:49:15	9.77	12.25	3.22212	-9.95923	-12.4873
2013-08-03 20:59:15	9.79	12.27	3.22907	-9.97961	-12.5076	2013-08-03 20:59:15
2013-08-03 21:09:15	9.19	11.72	3.23601	-9.36799	-11.947
2013-08-03 21:19:15	9.6	12.08	3.24296	-9.78593	-12.314
2013-08-03 21:29:15	9.6	12.05	3.2499	-9.78593	-12.2834
2013-08-03 21:39:15	9.61	12.06	3.25685	-9.79613	-12.2936
2013-08-03 21:49:15	9.64	12.09	3.26379	-9.82671	-12.3242
2013-08-03 21:59:15	9.68	12.12	3.27074	-9.86748	-12.3547	2013-08-03 21:59:15
2013-08-03 22:09:15	9.7	12.16	3.27768	-9.88787	-12.3955
2013-08-03 22:19:15	9.75	12.19	3.28462	-9.93884	-12.4261
2013-08-03 22:29:15	9.76	12.22	3.29157	-9.94903	-12.4567
2013-08-03 22:39:15	9.78	12.24	3.29851	-9.96942	-12.4771
2013-08-03 22:49:15	9.79	12.24	3.30546	-9.97961	-12.4771
2013-08-03 22:59:15	9.81	12.26	3.3124	-10	-12.4975	2013-08-03 22:59:15
2013-08-03 23:09:15	9.82	12.27	3.31935	-10.0102	-12.5076
2013-08-03 23:19:15	9.83	12.28	3.32629	-10.0204	-12.5178
2013-08-03 23:29:15	9.83	12.29	3.33324	-10.0204	-12.528
2013-08-03 23:39:15	9.84	12.3	3.34018	-10.0306	-12.5382
2013-08-03 23:49:15	9.86	12.31	3.34712	-10.051	-12.5484
2013-08-03 23:59:15	9.87	12.32	3.35407	-10.0612	-12.5586	2013-08-03 23:59:15
2013-08-04 00:09:15	9.87	12.32	3.36101	-10.0612	-12.5586
2013-08-04 00:19:15	9.87	12.32	3.36796	-10.0612	-12.5586
2013-08-04 00:29:15	9.83	12.28	3.3749	-10.0204	-12.5178
2013-08-04 00:39:15	9.85	12.3	3.38185	-10.0408	-12.5382
2013-08-04 00:49:15	9.85	12.31	3.38879	-10.0408	-12.5484
2013-08-04 00:59:15	9.84	12.29	3.39574	-10.0306	-12.528	2013-08-04 00:59:15
2013-08-04 01:09:15	9.86	12.31	3.40268	-10.051	-12.5484
2013-08-04 01:19:15	9.88	12.33	3.40962	-10.0714	-12.5688
2013-08-04 01:29:15	9.88	12.34	3.41657	-10.0714	-12.579
2013-08-04 01:39:15	9.91	12.36	3.42351	-10.1019	-12.5994
2013-08-04 01:49:15	9.9	12.36	3.43046	-10.0917	-12.5994
2013-08-04 01:59:15	9.91	12.37	3.4374	-10.1019	-12.6096	2013-08-04 01:59:15
2013-08-04 02:09:15	9.93	12.38	3.44435	-10.1223	-12.6198
2013-08-04 02:19:15	9.94	12.4	3.45129	-10.1325	-12.6402
2013-08-04 02:29:15	9.95	12.4	3.45824	-10.1427	-12.6402
2013-08-04 02:39:15	9.94	12.39	3.46518	-10.1325	-12.63
2013-08-04 02:49:15	9.96	12.42	3.47212	-10.1529	-12.6606
2013-08-04 02:59:15	9.97	12.42	3.47907	-10.1631	-12.6606	2013-08-04 02:59:15
2013-08-04 03:09:15	9.98	12.44	3.48601	-10.1733	-12.6809
2013-08-04 03:19:15	10	12.45	3.49296	-10.1937	-12.6911
2013-08-04 03:29:15	10.01	12.46	3.4999	-10.2039	-12.7013
2013-08-04 03:39:15	10.02	12.46	3.50685	-10.2141	-12.7013
2013-08-04 03:59:15	10.04	12.5	3.52074	-10.2345	-12.7421
2013-08-04 04:09:15	10.05	12.51	3.52768	-10.2446	-12.7523	2013-08-04 04:09:15
2013-08-04 04:19:15	10.06	12.51	3.53462	-10.2548	-12.7523
2013-08-04 04:29:15	10.08	12.53	3.54157	-10.2752	-12.7727
2013-08-04 04:39:15	10.08	12.53	3.54851	-10.2752	-12.7727
2013-08-04 04:49:15	10.09	12.54	3.55546	-10.2854	-12.7829
2013-08-04 04:59:15	10.1	12.56	3.5624	-10.2956	-12.8033
2013-08-04 05:09:15	10.11	12.56	3.56935	-10.3058	-12.8033	2013-08-04 05:09:15
2013-08-04 05:19:15	10.12	12.57	3.57629	-10.316	-12.8135
2013-08-04 05:29:15	10.13	12.58	3.58324	-10.3262	-12.8236
2013-08-04 05:39:15	10.13	12.58	3.59018	-10.3262	-12.8236
2013-08-04 05:49:15	10.15	12.6	3.59712	-10.3466	-12.844
2013-08-04 05:59:15	10.15	12.6	3.60407	-10.3466	-12.844
2013-08-04 06:09:15	10.16	12.61	3.61101	-10.3568	-12.8542	2013-08-04 06:09:15
2013-08-04 06:19:15	10.16	12.62	3.61796	-10.3568	-12.8644
2013-08-04 06:29:15	10.18	12.63	3.6249	-10.3772	-12.8746
2013-08-04 06:39:15	10.19	12.65	3.63185	-10.3874	-12.895
2013-08-04 06:49:15	10.2	12.65	3.63879	-10.3976	-12.895
2013-08-04 06:59:15	10.22	12.67	3.64574	-10.4179	-12.9154
2013-08-04 07:09:15	10.22	12.68	3.65268	-10.4179	-12.9256	2013-08-04 07:09:15
2013-08-04 07:19:15	10.23	12.69	3.65962	-10.4281	-12.9358
2013-08-04 07:29:15	10.24	12.69	3.66657	-10.4383	-12.9358
2013-08-04 07:39:15	10.25	12.71	3.67351	-10.4485	-12.9562
2013-08-04 07:49:15	10.27	12.72	3.68046	-10.4689	-12.9664
2013-08-04 07:59:15	10.28	12.73	3.6874	-10.4791	-12.9766
2013-08-04 08:09:15	10.28	12.74	3.69435	-10.4791	-12.9867	2013-08-04 08:09:15
2013-08-04 08:19:15	10.3	12.75	3.70129	-10.4995	-12.9969
2013-08-04 08:29:15	10.3	12.76	3.70824	-10.4995	-13.0071
2013-08-04 08:39:15	10.32	12.77	3.71518	-10.5199	-13.0173
2013-08-04 08:49:15	10.34	12.79	3.72212	-10.5403	-13.0377
2013-08-04 08:59:15	10.34	12.79	3.72907	-10.5403	-13.0377
2013-08-04 09:09:15	10.34	12.79	3.73601	-10.5403	-13.0377	2013-08-04 09:09:15
2013-08-04 09:19:15	10.35	12.81	3.74296	-10.5505	-13.0581
2013-08-04 09:29:15	10.36	12.81	3.7499	-10.5607	-13.0581
2013-08-04 09:39:15	10.37	12.83	3.75685	-10.5708	-13.0785
2013-08-04 09:49:15	10.39	12.83	3.76379	-10.5912	-13.0785
2013-08-04 09:59:15	10.39	12.84	3.77074	-10.5912	-13.0887
2013-08-04 10:09:15	10.4	12.85	3.77768	-10.6014	-13.0989	2013-08-04 10:09:15
2013-08-04 10:19:15	10.27	12.74	3.78462	-10.4689	-12.9867
2013-08-04 10:29:15	10.32	12.8	3.79157	-10.5199	-13.0479
2013-08-04 10:39:15	10.35	12.83	3.79851	-10.5505	-13.0785
2013-08-04 10:49:15	10.38	12.86	3.80546	-10.581	-13.1091
2013-08-04 10:59:15	10.43	12.89	3.8124	-10.632	-13.1397
2013-08-04 11:09:15	10.44	12.9	3.81935	-10.6422	-13.1498	2013-08-04 11:09:15
2013-08-04 11:19:15	10.45	12.92	3.82629	-10.6524	-13.1702
2013-08-04 11:29:15	10.47	12.93	3.83324	-10.6728	-13.1804
2013-08-04 11:39:15	10.47	12.94	3.84018	-10.6728	-13.1906
2013-08-04 11:49:15	10.49	12.96	3.84712	-10.6932	-13.211
2013-08-04 11:59:15	10.51	12.98	3.85407	-10.7136	-13.2314
2013-08-04 12:09:15	10.52	12.99	3.86101	-10.7238	-13.2416	2013-08-04 12:09:15
2013-08-04 12:19:15	10.52	13	3.86796	-10.7238	-13.2518
2013-08-04 12:29:15	10.54	13.01	3.8749	-10.7441	-13.262
2013-08-04 12:39:15	10.55	13.02	3.88185	-10.7543	-13.2722
2013-08-04 12:49:15	10.56	13.03	3.88879	-10.7645	-13.2824
2013-08-04 12:59:15	10.57	13.04	3.89574	-10.7747	-13.2926
2013-08-04 13:09:15	10.58	13.05	3.90268	-10.7849	-13.3028	2013-08-04 13:09:15
2013-08-04 13:19:15	10.61	13.07	3.90962	-10.8155	-13.3231
2013-08-04 13:29:15	10.6	13.07	3.91657	-10.8053	-13.3231
2013-08-04 13:39:15	10.61	13.08	3.92351	-10.8155	-13.3333
2013-08-04 13:59:15	10.65	13.11	3.9374	-10.8563	-13.3639
2013-08-04 14:09:15	10.66	13.13	3.94435	-10.8665	-13.3843
2013-08-04 14:19:15	10.66	13.13	3.95129	-10.8665	-13.3843	2013-08-04 14:19:15
2013-08-04 14:29:15	10.68	13.14	3.95824	-10.8869	-13.3945
2013-08-04 14:49:15	10.72	13.18	3.97212	-10.9276	-13.4353
2013-08-04 14:59:15	10.72	13.19	3.97907	-10.9276	-13.4455
2013-08-04 15:09:15	10.73	13.2	3.98601	-10.9378	-13.4557
2013-08-04 15:19:15	10.74	13.22	3.99296	-10.948	-13.476
2013-08-04 15:29:15	10.75	13.22	3.9999	-10.9582	-13.476	2013-08-04 15:29:15
2013-08-04 15:39:15	10.78	13.23	4.00685	-10.9888	-13.4862
2013-08-04 15:49:15	10.79	13.25	4.01379	-10.999	-13.5066
2013-08-04 15:59:15	10.81	13.27	4.02074	-11.0194	-13.527
2013-08-04 16:09:15	10.81	13.28	4.02768	-11.0194	-13.5372
2013-08-04 16:19:15	10.82	13.28	4.03462	-11.0296	-13.5372
2013-08-04 16:29:15	10.83	13.3	4.04157	-11.0398	-13.5576	2013-08-04 16:29:15
2013-08-04 16:39:15	10.85	13.33	4.04851	-11.0601	-13.5882
2013-08-04 16:49:15	10.86	13.34	4.05546	-11.0703	-13.5984
2013-08-04 16:59:15	10.88	13.35	4.0624	-11.0907	-13.6086
2013-08-04 17:09:15	10.89	13.34	4.06935	-11.1009	-13.5984
2013-08-04 17:19:15	10.91	13.38	4.07629	-11.1213	-13.6391
2013-08-04 17:29:15	10.92	13.38	4.08324	-11.1315	-13.6391	2013-08-04 17:29:15
2013-08-04 17:39:15	10.94	13.4	4.09018	-11.1519	-13.6595
2013-08-04 17:49:15	10.95	13.41	4.09712	-11.1621	-13.6697
2013-08-04 17:59:15	10.96	13.42	4.10407	-11.1723	-13.6799
2013-08-04 18:09:15	10.97	13.43	4.11101	-11.1825	-13.6901
2013-08-04 18:19:15	10.99	13.45	4.11796	-11.2029	-13.7105
2013-08-04 18:29:15	11.01	13.47	4.1249	-11.2232	-13.7309	2013-08-04 18:29:15
2013-08-04 18:39:15	11.02	13.48	4.13185	-11.2334	-13.7411
2013-08-04 18:49:15	11.03	13.49	4.13879	-11.2436	-13.7513
2013-08-04 18:59:15	11.06	13.52	4.14574	-11.2742	-13.7819
2013-08-04 19:09:15	11.07	13.54	4.15268	-11.2844	-13.8022
2013-08-04 19:19:15	11.08	13.55	4.15962	-11.2946	-13.8124
2013-08-04 19:29:15	11.1	13.56	4.16657	-11.315	-13.8226	2013-08-04 19:29:15
2013-08-04 19:39:15	11.12	13.57	4.17351	-11.3354	-13.8328
2013-08-04 19:49:15	11.13	13.59	4.18046	-11.3456	-13.8532
2013-08-04 19:59:15	11.14	13.61	4.1874	-11.3558	-13.8736
2013-08-04 20:09:15	11.16	13.63	4.19435	-11.3761	-13.894
2013-08-04 20:19:15	10.78	13.29	4.20129	-10.9888	-13.5474
2013-08-04 20:29:15	11.11	13.57	4.20824	-11.3252	-13.8328	2013-08-04 20:29:15
2013-08-04 20:49:15	11.17	13.62	4.22212	-11.3863	-13.8838
2013-08-04 20:59:15	11.17	13.63	4.22907	-11.3863	-13.894
2013-08-04 21:09:15	11.19	13.64	4.23601	-11.4067	-13.9042
2013-08-04 21:19:15	11.2	13.66	4.24296	-11.4169	-13.9246
2013-08-04 21:29:15	11.22	13.67	4.2499	-11.4373	-13.9348
2013-08-04 21:39:15	11.23	13.7	4.25685	-11.4475	-13.9653	2013-08-04 21:39:15
2013-08-04 21:49:15	11.24	13.7	4.26379	-11.4577	-13.9653
2013-08-04 21:59:15	11.26	13.71	4.27074	-11.4781	-13.9755
2013-08-04 22:09:15	11.27	13.73	4.27768	-11.4883	-13.9959
2013-08-04 22:19:15	11.28	13.74	4.28462	-11.4985	-14.0061
2013-08-04 22:29:15	11.3	13.75	4.29157	-11.5189	-14.0163
2013-08-04 22:39:15	11.31	13.77	4.29851	-11.5291	-14.0367	2013-08-04 22:39:15
2013-08-04 22:49:15	11.32	13.78	4.30546	-11.5392	-14.0469
2013-08-04 22:59:15	11.34	13.79	4.3124	-11.5596	-14.0571
2013-08-04 23:09:15	11.34	13.8	4.31935	-11.5596	-14.0673
2013-08-04 23:19:15	11.35	13.81	4.32629	-11.5698	-14.0775
2013-08-04 23:29:15	11.36	13.82	4.33324	-11.58	-14.0877
2013-08-04 23:39:15	11.38	13.84	4.34018	-11.6004	-14.1081	2013-08-04 23:39:15
2013-08-04 23:49:15	11.38	13.85	4.34712	-11.6004	-14.1182
2013-08-04 23:59:15	11.41	13.87	4.35407	-11.631	-14.1386
2013-08-05 00:09:15	11.41	13.88	4.36101	-11.631	-14.1488
2013-08-05 00:19:15	11.42	13.89	4.36796	-11.6412	-14.159
2013-08-05 00:29:15	11.44	13.89	4.3749	-11.6616	-14.159
2013-08-05 00:39:15	11.44	13.9	4.38185	-11.6616	-14.1692	2013-08-05 00:39:15
2013-08-05 00:49:15	11.45	13.92	4.38879	-11.6718	-14.1896
2013-08-05 00:59:15	11.46	13.93	4.39574	-11.682	-14.1998
2013-08-05 01:09:15	11.48	13.93	4.40268	-11.7023	-14.1998
2013-08-05 01:19:15	11.49	13.94	4.40962	-11.7125	-14.21
2013-08-05 01:29:15	11.5	13.97	4.41657	-11.7227	-14.2406
2013-08-05 01:39:15	11.45	13.92	4.42351	-11.6718	-14.1896	2013-08-05 01:39:15
2013-08-05 01:49:15	11.47	13.93	4.43046	-11.6922	-14.1998
2013-08-05 01:59:15	11.48	13.94	4.4374	-11.7023	-14.21
2013-08-05 02:09:15	11.49	13.95	4.44435	-11.7125	-14.2202
2013-08-05 02:19:15	11.51	13.96	4.45129	-11.7329	-14.2304
2013-08-05 02:29:15	11.53	13.97	4.45824	-11.7533	-14.2406
2013-08-05 02:39:15	11.53	13.98	4.46518	-11.7533	-14.2508	2013-08-05 02:39:15
2013-08-05 02:49:15	11.53	14	4.47212	-11.7533	-14.2712
2013-08-05 02:59:15	11.54	14	4.47907	-11.7635	-14.2712
2013-08-05 03:09:15	11.56	14.01	4.48601	-11.7839	-14.2813
2013-08-05 03:19:15	11.55	14.01	4.49296	-11.7737	-14.2813
2013-08-05 03:29:15	11.57	14.03	4.4999	-11.7941	-14.3017
2013-08-05 03:39:15	11.59	14.05	4.50685	-11.8145	-14.3221	2013-08-05 03:39:15
2013-08-05 03:49:15	11.58	14.05	4.51379	-11.8043	-14.3221
2013-08-05 03:59:15	11.6	14.06	4.52074	-11.8247	-14.3323
2013-08-05 04:09:15	11.61	14.07	4.52768	-11.8349	-14.3425
2013-08-05 04:19:15	11.61	14.07	4.53462	-11.8349	-14.3425
2013-08-05 04:39:15	11.65	14.11	4.54851	-11.8756	-14.3833
2013-08-05 04:49:15	11.65	14.11	4.55546	-11.8756	-14.3833	2013-08-05 04:49:15
2013-08-05 04:59:15	11.67	14.12	4.5624	-11.896	-14.3935
2013-08-05 05:09:15	11.68	14.14	4.56935	-11.9062	-14.4139
2013-08-05 05:19:15	11.68	14.14	4.57629	-11.9062	-14.4139
2013-08-05 05:29:15	11.7	14.16	4.58324	-11.9266	-14.4343
2013-08-05 05:49:15	11.73	14.18	4.59712	-11.9572	-14.4546
2013-08-05 05:59:15	11.73	14.19	4.60407	-11.9572	-14.4648	2013-08-05 05:59:15
2013-08-05 06:09:15	11.75	14.19	4.61101	-11.9776	-14.4648
2013-08-05 06:29:15	11.77	14.23	4.6249	-11.998	-14.5056
2013-08-05 06:39:15	11.8	14.25	4.63185	-12.0285	-14.526
2013-08-05 06:49:15	11.81	14.26	4.63879	-12.0387	-14.5362
2013-08-05 06:59:15	11.81	14.27	4.64574	-12.0387	-14.5464
2013-08-05 07:09:15	11.82	14.28	4.65268	-12.0489	-14.5566	2013-08-05 07:09:15
2013-08-05 07:19:15	11.84	14.3	4.65962	-12.0693	-14.577
2013-08-05 07:29:15	11.85	14.31	4.66657	-12.0795	-14.5872
2013-08-05 07:39:15	11.86	14.32	4.67351	-12.0897	-14.5973
2013-08-05 07:49:15	11.87	14.33	4.68046	-12.0999	-14.6075
2013-08-05 07:59:15	11.89	14.35	4.6874	-12.1203	-14.6279
2013-08-05 08:09:15	11.9	14.36	4.69435	-12.1305	-14.6381	2013-08-05 08:09:15
2013-08-05 08:19:15	11.91	14.37	4.70129	-12.1407	-14.6483
2013-08-05 08:29:15	11.92	14.39	4.70824	-12.1509	-14.6687
2013-08-05 08:39:15	11.94	14.39	4.71518	-12.1713	-14.6687
2013-08-05 08:49:15	11.87	14.34	4.72212	-12.0999	-14.6177
2013-08-05 08:59:15	11.91	14.38	4.72907	-12.1407	-14.6585
2013-08-05 09:09:15	11.95	14.42	4.73601	-12.1814	-14.6993	2013-08-05 09:09:15
2013-08-05 09:19:15	11.99	14.45	4.74296	-12.2222	-14.7299
2013-08-05 09:29:15	12	14.47	4.7499	-12.2324	-14.7503
2013-08-05 09:39:15	12.02	14.49	4.75685	-12.2528	-14.7706
2013-08-05 09:49:15	12.03	14.49	4.76379	-12.263	-14.7706
2013-08-05 09:59:15	12.04	14.51	4.77074	-12.2732	-14.791
2013-08-05 10:09:15	12.04	14.52	4.77768	-12.2732	-14.8012	2013-08-05 10:09:15
2013-08-05 10:19:15	12.08	14.54	4.78462	-12.314	-14.8216
2013-08-05 10:29:15	12.11	14.56	4.79157	-12.3445	-14.842
2013-08-05 10:39:15	12.1	14.57	4.79851	-12.3344	-14.8522
2013-08-05 10:49:15	12.12	14.59	4.80546	-12.3547	-14.8726
2013-08-05 10:59:15	12.13	14.59	4.8124	-12.3649	-14.8726
2013-08-05 11:09:15	12.14	14.61	4.81935	-12.3751	-14.893	2013-08-05 11:09:15
2013-08-05 11:19:15	12.16	14.62	4.82629	-12.3955	-14.9032
2013-08-05 11:29:15	12.17	14.63	4.83324	-12.4057	-14.9134
2013-08-05 11:39:15	12.18	14.65	4.84018	-12.4159	-14.9337
2013-08-05 11:49:15	12.2	14.67	4.84712	-12.4363	-14.9541
2013-08-05 11:59:15	12.21	14.69	4.85407	-12.4465	-14.9745
2013-08-05 12:09:15	12.23	14.71	4.86101	-12.4669	-14.9949	2013-08-05 12:09:15
2013-08-05 12:19:15	12.25	14.71	4.86796	-12.4873	-14.9949
2013-08-05 12:29:15	12.25	14.73	4.8749	-12.4873	-15.0153
2013-08-05 12:39:15	12.27	14.73	4.88185	-12.5076	-15.0153
2013-08-05 12:49:15	12.28	14.75	4.88879	-12.5178	-15.0357
2013-08-05 12:59:15	12.28	14.75	4.89574	-12.5178	-15.0357
2013-08-05 13:09:15	12.3	14.77	4.90268	-12.5382	-15.0561	2013-08-05 13:09:15
2013-08-05 13:19:15	12.31	14.78	4.90962	-12.5484	-15.0663
2013-08-05 13:29:15	12.21	14.67	4.91657	-12.4465	-14.9541
2013-08-05 13:39:15	12.3	14.75	4.92351	-12.5382	-15.0357
2013-08-05 13:49:15	12.34	14.8	4.93046	-12.579	-15.0866
2013-08-05 13:59:15	12.36	14.82	4.9374	-12.5994	-15.107
2013-08-05 14:09:15	12.38	14.84	4.94435	-12.6198	-15.1274	2013-08-05 14:09:15
2013-08-05 14:19:15	12.4	14.86	4.95129	-12.6402	-15.1478
2013-08-05 14:29:15	12.41	14.87	4.95824	-12.6504	-15.158
2013-08-05 14:39:15	12.43	14.9	4.96518	-12.6707	-15.1886
2013-08-05 14:49:15	12.45	14.91	4.97212	-12.6911	-15.1988
2013-08-05 14:59:15	12.47	14.92	4.97907	-12.7115	-15.209
2013-08-05 15:09:15	12.48	14.94	4.98601	-12.7217	-15.2294	2013-08-05 15:09:15
2013-08-05 15:19:15	12.5	14.96	4.99296	-12.7421	-15.2497
2013-08-05 15:29:15	12.53	14.98	4.9999	-12.7727	-15.2701
2013-08-05 15:39:15	12.54	15	5.00685	-12.7829	-15.2905
2013-08-05 15:49:15	12.55	15.01	5.01379	-12.7931	-15.3007
2013-08-05 15:59:15	12.58	15.03	5.02074	-12.8236	-15.3211
2013-08-05 16:09:15	12.59	15.05	5.02768	-12.8338	-15.3415	2013-08-05 16:09:15
2013-08-05 16:19:15	12.61	15.07	5.03462	-12.8542	-15.3619
2013-08-05 16:29:15	12.63	15.08	5.04157	-12.8746	-15.3721
2013-08-05 16:39:15	12.65	15.1	5.04851	-12.895	-15.3925
2013-08-05 16:49:15	12.66	15.12	5.05546	-12.9052	-15.4128
2013-08-05 16:59:15	12.67	15.12	5.0624	-12.9154	-15.4128
2013-08-05 17:09:15	12.71	15.16	5.06935	-12.9562	-15.4536	2013-08-05 17:09:15
2013-08-05 17:19:15	12.73	15.18	5.07629	-12.9766	-15.474
2013-08-05 17:29:15	12.73	15.19	5.08324	-12.9766	-15.4842
2013-08-05 17:39:15	12.77	15.22	5.09018	-13.0173	-15.5148
2013-08-05 17:49:15	12.79	15.23	5.09712	-13.0377	-15.525
2013-08-05 17:59:15	12.81	15.26	5.10407	-13.0581	-15.5556
2013-08-05 18:09:15	12.82	15.27	5.11101	-13.0683	-15.5657	2013-08-05 18:09:15
2013-08-05 18:19:15	12.84	15.29	5.11796	-13.0887	-15.5861
2013-08-05 18:29:15	12.86	15.31	5.1249	-13.1091	-15.6065
2013-08-05 18:39:15	12.87	15.32	5.13185	-13.1193	-15.6167
2013-08-05 18:49:15	12.89	15.35	5.13879	-13.1397	-15.6473
2013-08-05 18:59:15	12.92	15.37	5.14574	-13.1702	-15.6677
2013-08-05 19:09:15	12.92	15.37	5.15268	-13.1702	-15.6677	2013-08-05 19:09:15
2013-08-05 19:19:15	12.94	15.4	5.15962	-13.1906	-15.6983
2013-08-05 19:29:15	12.96	15.42	5.16657	-13.211	-15.7187
2013-08-05 19:39:15	12.99	15.45	5.17351	-13.2416	-15.7492
2013-08-05 19:49:15	13.01	15.46	5.18046	-13.262	-15.7594
2013-08-05 19:59:15	13.02	15.48	5.1874	-13.2722	-15.7798
2013-08-05 20:09:15	13.03	15.49	5.19435	-13.2824	-15.79	2013-08-05 20:09:15
2013-08-05 20:19:15	13.06	15.51	5.20129	-13.3129	-15.8104
2013-08-05 20:29:15	13.07	15.52	5.20824	-13.3231	-15.8206
2013-08-05 20:39:15	13.08	15.53	5.21518	-13.3333	-15.8308
2013-08-05 20:49:15	12.85	15.3	5.22212	-13.0989	-15.5963
2013-08-05 20:59:15	12.95	15.41	5.22907	-13.2008	-15.7085
2013-08-05 21:09:15	13.02	15.46	5.23601	-13.2722	-15.7594	2013-08-05 21:09:15
2013-08-05 21:19:15	13.07	15.52	5.24296	-13.3231	-15.8206
2013-08-05 21:29:15	13.09	15.55	5.2499	-13.3435	-15.8512
2013-08-05 21:39:15	13.12	15.56	5.25685	-13.3741	-15.8614
2013-08-05 21:49:15	13.08	15.53	5.26379	-13.3333	-15.8308
2013-08-05 21:59:15	13.11	15.56	5.27074	-13.3639	-15.8614
2013-08-05 22:09:15	13.11	15.56	5.27768	-13.3639	-15.8614	2013-08-05 22:09:15
2013-08-05 22:19:15	13.13	15.57	5.28462	-13.3843	-15.8716
2013-08-05 22:29:15	13.14	15.58	5.29157	-13.3945	-15.8818
2013-08-05 22:39:15	13.14	15.6	5.29851	-13.3945	-15.9021
2013-08-05 22:49:15	13.16	15.61	5.30546	-13.4149	-15.9123
2013-08-05 22:59:15	13.19	15.64	5.3124	-13.4455	-15.9429
2013-08-05 23:09:15	13.18	15.64	5.31935	-13.4353	-15.9429	2013-08-05 23:09:15
2013-08-05 23:19:15	13.2	15.65	5.32629	-13.4557	-15.9531
2013-08-05 23:29:15	13.21	15.66	5.33324	-13.4659	-15.9633
2013-08-05 23:39:15	13.22	15.67	5.34018	-13.476	-15.9735
2013-08-05 23:49:15	13.24	15.7	5.34712	-13.4964	-16.0041
2013-08-05 23:59:15	13.24	15.7	5.35407	-13.4964	-16.0041
2013-08-06 00:09:15	13.26	15.72	5.36101	-13.5168	-16.0245	2013-08-06 00:09:15
2013-08-06 00:19:15	13.26	15.73	5.36796	-13.5168	-16.0347
2013-08-06 00:29:15	13.29	15.74	5.3749	-13.5474	-16.0449
2013-08-06 00:39:15	13.29	15.75	5.38185	-13.5474	-16.055
2013-08-06 00:49:15	13.31	15.76	5.38879	-13.5678	-16.0652
2013-08-06 00:59:15	13.32	15.77	5.39574	-13.578	-16.0754
2013-08-06 01:09:15	13.33	15.78	5.40268	-13.5882	-16.0856	2013-08-06 01:09:15
2013-08-06 01:19:15	13.35	15.79	5.40962	-13.6086	-16.0958
2013-08-06 01:29:15	13.35	15.81	5.41657	-13.6086	-16.1162
2013-08-06 01:39:15	13.36	15.82	5.42351	-13.6188	-16.1264
2013-08-06 01:49:15	13.37	15.82	5.43046	-13.629	-16.1264
2013-08-06 01:59:15	13.39	15.84	5.4374	-13.6493	-16.1468
2013-08-06 02:09:15	13.4	15.85	5.44435	-13.6595	-16.157	2013-08-06 02:09:15
2013-08-06 02:19:15	13.41	15.86	5.45129	-13.6697	-16.1672
2013-08-06 02:29:15	13.42	15.87	5.45824	-13.6799	-16.1774
2013-08-06 02:39:15	13.44	15.89	5.46518	-13.7003	-16.1978
2013-08-06 02:49:15	13.44	15.9	5.47212	-13.7003	-16.208
2013-08-06 02:59:15	13.45	15.91	5.47907	-13.7105	-16.2181
2013-08-06 03:09:15	13.46	15.93	5.48601	-13.7207	-16.2385	2013-08-06 03:09:15
2013-08-06 03:19:15	13.47	15.92	5.49296	-13.7309	-16.2283
2013-08-06 03:29:15	13.47	15.94	5.4999	-13.7309	-16.2487
2013-08-06 03:39:15	13.49	15.94	5.50685	-13.7513	-16.2487
2013-08-06 03:49:15	13.49	15.94	5.51379	-13.7513	-16.2487
2013-08-06 03:59:15	13.51	15.96	5.52074	-13.7717	-16.2691
2013-08-06 04:09:15	13.51	15.97	5.52768	-13.7717	-16.2793	2013-08-06 04:09:15
2013-08-06 04:19:15	13.53	15.97	5.53462	-13.792	-16.2793
2013-08-06 04:29:15	13.53	15.99	5.54157	-13.792	-16.2997
2013-08-06 04:39:15	13.56	16.01	5.54851	-13.8226	-16.3201
2013-08-06 04:49:15	13.56	16.01	5.55546	-13.8226	-16.3201
2013-08-06 04:59:15	13.56	16.02	5.5624	-13.8226	-16.3303
2013-08-06 05:09:15	13.58	16.03	5.56935	-13.843	-16.3405	2013-08-06 05:09:15
2013-08-06 05:19:15	13.59	16.04	5.57629	-13.8532	-16.3507
2013-08-06 05:29:15	13.59	16.05	5.58324	-13.8532	-16.3609
2013-08-06 05:39:15	13.6	16.06	5.59018	-13.8634	-16.371
2013-08-06 05:49:15	13.61	16.07	5.59712	-13.8736	-16.3812
2013-08-06 05:59:15	13.63	16.09	5.60407	-13.894	-16.4016
2013-08-06 06:09:15	13.64	16.1	5.61101	-13.9042	-16.4118	2013-08-06 06:09:15
2013-08-06 06:19:15	13.65	16.1	5.61796	-13.9144	-16.4118
2013-08-06 06:29:15	13.65	16.11	5.6249	-13.9144	-16.422
2013-08-06 06:39:15	13.66	16.12	5.63185	-13.9246	-16.4322
2013-08-06 06:49:15	13.67	16.13	5.63879	-13.9348	-16.4424
2013-08-06 06:59:15	13.68	16.15	5.64574	-13.945	-16.4628
2013-08-06 07:09:15	13.69	16.14	5.65268	-13.9551	-16.4526	2013-08-06 07:09:15
2013-08-06 07:29:15	13.68	16.16	5.66657	-13.945	-16.473
2013-08-06 07:39:15	13.72	16.19	5.67351	-13.9857	-16.5036
2013-08-06 07:49:15	13.75	16.2	5.68046	-14.0163	-16.5138
2013-08-06 07:59:15	13.75	16.2	5.6874	-14.0163	-16.5138
2013-08-06 08:09:15	13.76	16.21	5.69435	-14.0265	-16.524
2013-08-06 08:19:15	13.77	16.23	5.70129	-14.0367	-16.5443	2013-08-06 08:19:15
2013-08-06 08:29:15	13.78	16.24	5.70824	-14.0469	-16.5545
2013-08-06 08:39:15	13.78	16.24	5.71518	-14.0469	-16.5545
2013-08-06 08:49:15	13.81	16.26	5.72212	-14.0775	-16.5749
2013-08-06 08:59:15	13.8	16.27	5.72907	-14.0673	-16.5851
2013-08-06 09:09:15	13.82	16.28	5.73601	-14.0877	-16.5953
2013-08-06 09:19:15	13.84	16.3	5.74296	-14.1081	-16.6157	2013-08-06 09:19:15
2013-08-06 09:29:15	13.84	16.29	5.7499	-14.1081	-16.6055
2013-08-06 09:39:15	13.86	16.31	5.75685	-14.1284	-16.6259
2013-08-06 09:49:15	13.87	16.32	5.76379	-14.1386	-16.6361
2013-08-06 10:09:15	13.9	16.34	5.77768	-14.1692	-16.6565
2013-08-06 10:19:15	13.89	16.35	5.78462	-14.159	-16.6667
2013-08-06 10:29:15	13.9	16.36	5.79157	-14.1692	-16.6769	2013-08-06 10:29:15
2013-08-06 10:39:15	13.91	16.37	5.79851	-14.1794	-16.6871
2013-08-06 10:49:15	13.93	16.38	5.80546	-14.1998	-16.6972
2013-08-06 10:59:15	13.93	16.39	5.8124	-14.1998	-16.7074
2013-08-06 11:09:15	13.94	16.4	5.81935	-14.21	-16.7176
2013-08-06 11:19:15	13.95	16.41	5.82629	-14.2202	-16.7278
2013-08-06 11:29:15	13.97	16.42	5.83324	-14.2406	-16.738	2013-08-06 11:29:15
2013-08-06 11:39:15	13.98	16.43	5.84018	-14.2508	-16.7482
2013-08-06 11:49:15	13.97	16.43	5.84712	-14.2406	-16.7482
2013-08-06 11:59:15	14.01	16.46	5.85407	-14.2813	-16.7788
2013-08-06 12:09:15	14.02	16.48	5.86101	-14.2915	-16.7992
2013-08-06 12:19:15	14.03	16.49	5.86796	-14.3017	-16.8094
2013-08-06 12:29:15	14.05	16.51	5.8749	-14.3221	-16.8298	2013-08-06 12:29:15
2013-08-06 12:39:15	14.05	16.52	5.88185	-14.3221	-16.84
2013-08-06 12:49:15	14.05	16.53	5.88879	-14.3221	-16.8502
2013-08-06 12:59:15	13.97	16.43	5.89574	-14.2406	-16.7482
2013-08-06 13:09:15	14.05	16.52	5.90268	-14.3221	-16.84
2013-08-06 13:19:15	14.04	16.49	5.90962	-14.3119	-16.8094
2013-08-06 13:29:15	14.05	16.5	5.91657	-14.3221	-16.8196	2013-08-06 13:29:15
2013-08-06 13:39:15	14.07	16.53	5.92351	-14.3425	-16.8502
2013-08-06 13:49:15	14.1	16.55	5.93046	-14.3731	-16.8705
2013-08-06 13:59:15	14.12	16.57	5.9374	-14.3935	-16.8909
2013-08-06 14:09:15	14.13	16.59	5.94435	-14.4037	-16.9113
2013-08-06 14:19:15	14.17	16.6	5.95129	-14.4444	-16.9215
2013-08-06 14:29:15	14.17	16.63	5.95824	-14.4444	-16.9521	2013-08-06 14:29:15
2013-08-06 14:39:15	14.2	16.64	5.96518	-14.475	-16.9623
2013-08-06 14:49:15	14.22	16.67	5.97212	-14.4954	-16.9929
2013-08-06 14:59:15	14.23	16.68	5.97907	-14.5056	-17.0031
2013-08-06 15:09:15	14.26	16.71	5.98601	-14.5362	-17.0336
2013-08-06 15:19:15	14.27	16.72	5.99296	-14.5464	-17.0438
2013-08-06 15:29:15	14.3	16.75	5.9999	-14.577	-17.0744	2013-08-06 15:29:15
2013-08-06 15:39:15	14.3	16.76	6.00685	-14.577	-17.0846
2013-08-06 15:49:15	14.33	16.79	6.01379	-14.6075	-17.1152
2013-08-06 15:59:15	14.35	16.8	6.02074	-14.6279	-17.1254
2013-08-06 16:09:15	14.38	16.83	6.02768	-14.6585	-17.156
2013-08-06 16:19:15	14.41	16.86	6.03462	-14.6891	-17.1865
2013-08-06 16:29:15	14.41	16.86	6.04157	-14.6891	-17.1865	2013-08-06 16:29:15
2013-08-06 16:39:15	14.43	16.88	6.04851	-14.7095	-17.2069
2013-08-06 16:49:15	14.46	16.91	6.05546	-14.7401	-17.2375
2013-08-06 16:59:15	14.48	16.92	6.0624	-14.7604	-17.2477
2013-08-06 17:09:15	14.51	16.94	6.06935	-14.791	-17.2681
2013-08-06 17:19:15	14.52	16.97	6.07629	-14.8012	-17.2987
2013-08-06 17:29:15	14.56	16.99	6.08324	-14.842	-17.3191	2013-08-06 17:29:15
2013-08-06 17:39:15	14.57	17.01	6.09018	-14.8522	-17.3394
2013-08-06 17:49:15	14.59	17.04	6.09712	-14.8726	-17.37
2013-08-06 17:59:15	14.6	17.05	6.10407	-14.8828	-17.3802
2013-08-06 18:09:15	14.63	17.08	6.11101	-14.9134	-17.4108
2013-08-06 18:19:15	14.51	16.97	6.11796	-14.791	-17.2987
2013-08-06 18:29:15	14.65	17.1	6.1249	-14.9337	-17.4312	2013-08-06 18:29:15
2013-08-06 18:39:15	14.7	17.15	6.13185	-14.9847	-17.4822
2013-08-06 18:49:15	14.73	17.18	6.13879	-15.0153	-17.5127
2013-08-06 18:59:15	14.75	17.2	6.14574	-15.0357	-17.5331
2013-08-06 19:09:15	14.77	17.22	6.15268	-15.0561	-17.5535
2013-08-06 19:19:15	14.79	17.25	6.15962	-15.0765	-17.5841
2013-08-06 19:29:15	14.81	17.26	6.16657	-15.0968	-17.5943	2013-08-06 19:29:15
2013-08-06 19:39:15	14.83	17.28	6.17351	-15.1172	-17.6147
2013-08-06 19:49:15	14.83	17.28	6.18046	-15.1172	-17.6147
2013-08-06 19:59:15	14.85	17.31	6.1874	-15.1376	-17.6453
2013-08-06 20:09:15	14.89	17.33	6.19435	-15.1784	-17.6656
2013-08-06 20:19:15	14.89	17.35	6.20129	-15.1784	-17.686
2013-08-06 20:29:15	14.91	17.36	6.20824	-15.1988	-17.6962	2013-08-06 20:29:15
2013-08-06 20:39:15	14.92	17.37	6.21518	-15.209	-17.7064
2013-08-06 20:49:15	14.94	17.39	6.22212	-15.2294	-17.7268
2013-08-06 20:59:15	14.96	17.42	6.22907	-15.2497	-17.7574
2013-08-06 21:09:15	14.97	17.42	6.23601	-15.2599	-17.7574
2013-08-06 21:19:15	14.98	17.44	6.24296	-15.2701	-17.7778
2013-08-06 21:29:15	15.01	17.47	6.2499	-15.3007	-17.8084	2013-08-06 21:29:15
2013-08-06 21:39:15	15.02	17.47	6.25685	-15.3109	-17.8084
2013-08-06 21:49:15	15.03	17.49	6.26379	-15.3211	-17.8287
2013-08-06 21:59:15	15.04	17.5	6.27074	-15.3313	-17.8389
2013-08-06 22:09:15	15.05	17.51	6.27768	-15.3415	-17.8491
2013-08-06 22:19:15	15.06	17.53	6.28462	-15.3517	-17.8695
2013-08-06 22:29:15	15.08	17.53	6.29157	-15.3721	-17.8695	2013-08-06 22:29:15
2013-08-06 22:39:15	15.09	17.54	6.29851	-15.3823	-17.8797
2013-08-06 22:49:15	15.09	17.56	6.30546	-15.3823	-17.9001
2013-08-06 22:59:15	15.12	17.57	6.3124	-15.4128	-17.9103
2013-08-06 23:09:15	15.11	17.58	6.31935	-15.4027	-17.9205
2013-08-06 23:19:15	15.14	17.58	6.32629	-15.4332	-17.9205
2013-08-06 23:29:15	15.15	17.61	6.33324	-15.4434	-17.9511	2013-08-06 23:29:15
2013-08-06 23:39:15	15.15	17.62	6.34018	-15.4434	-17.9613
2013-08-06 23:49:15	15.17	17.63	6.34712	-15.4638	-17.9715
2013-08-06 23:59:15	15.17	17.63	6.35407	-15.4638	-17.9715
2013-08-07 00:09:15	15.19	17.64	6.36101	-15.4842	-17.9817
2013-08-07 00:19:15	15.19	17.65	6.36796	-15.4842	-17.9918
2013-08-07 00:29:15	15.2	17.66	6.3749	-15.4944	-18.002	2013-08-07 00:29:15
2013-08-07 00:39:15	15.23	17.68	6.38185	-15.525	-18.0224
2013-08-07 00:49:15	15.23	17.69	6.38879	-15.525	-18.0326
2013-08-07 00:59:15	15.24	17.7	6.39574	-15.5352	-18.0428
2013-08-07 01:09:15	15.25	17.7	6.40268	-15.5454	-18.0428
2013-08-07 01:19:15	15.27	17.72	6.40962	-15.5657	-18.0632
2013-08-07 01:29:15	15.27	17.74	6.41657	-15.5657	-18.0836	2013-08-07 01:29:15
2013-08-07 01:39:15	15.28	17.75	6.42351	-15.5759	-18.0938
2013-08-07 01:49:15	15.29	17.75	6.43046	-15.5861	-18.0938
2013-08-07 01:59:15	15.3	17.76	6.4374	-15.5963	-18.104
2013-08-07 02:09:15	15.31	17.77	6.44435	-15.6065	-18.1142
2013-08-07 02:19:15	15.28	17.73	6.45129	-15.5759	-18.0734
2013-08-07 02:29:15	15.28	17.75	6.45824	-15.5759	-18.0938	2013-08-07 02:29:15
2013-08-07 02:39:15	15.3	17.76	6.46518	-15.5963	-18.104
2013-08-07 02:49:15	15.31	17.77	6.47212	-15.6065	-18.1142
2013-08-07 02:59:15	15.32	17.78	6.47907	-15.6167	-18.1244
2013-08-07 03:09:15	15.33	17.8	6.48601	-15.6269	-18.1448
2013-08-07 03:19:15	15.35	17.81	6.49296	-15.6473	-18.1549
2013-08-07 03:29:15	15.36	17.82	6.4999	-15.6575	-18.1651	2013-08-07 03:29:15
2013-08-07 03:39:15	15.36	17.83	6.50685	-15.6575	-18.1753
2013-08-07 03:49:15	15.38	17.84	6.51379	-15.6779	-18.1855
2013-08-07 03:59:15	15.4	17.85	6.52074	-15.6983	-18.1957
2013-08-07 04:09:15	15.4	17.86	6.52768	-15.6983	-18.2059
2013-08-07 04:19:15	15.41	17.87	6.53462	-15.7085	-18.2161
2013-08-07 04:29:15	15.43	17.89	6.54157	-15.7288	-18.2365	2013-08-07 04:29:15
2013-08-07 04:39:15	15.43	17.89	6.54851	-15.7288	-18.2365
2013-08-07 04:49:15	15.44	17.9	6.55546	-15.739	-18.2467
2013-08-07 04:59:15	15.45	17.92	6.5624	-15.7492	-18.2671
2013-08-07 05:09:15	15.46	17.92	6.56935	-15.7594	-18.2671
2013-08-07 05:19:15	15.47	17.93	6.57629	-15.7696	-18.2773
2013-08-07 05:29:15	15.49	17.95	6.58324	-15.79	-18.2977	2013-08-07 05:29:15
2013-08-07 05:39:15	15.49	17.95	6.59018	-15.79	-18.2977
2013-08-07 05:49:15	15.52	17.98	6.59712	-15.8206	-18.3282
2013-08-07 05:59:15	15.52	17.99	6.60407	-15.8206	-18.3384
2013-08-07 06:09:15	15.53	17.99	6.61101	-15.8308	-18.3384
2013-08-07 06:19:15	15.54	18	6.61796	-15.841	-18.3486
2013-08-07 06:29:15	15.56	18.01	6.6249	-15.8614	-18.3588	2013-08-07 06:29:15
2013-08-07 06:39:15	15.57	18.02	6.63185	-15.8716	-18.369
2013-08-07 06:49:15	15.58	18.04	6.63879	-15.8818	-18.3894
2013-08-07 06:59:15	15.58	18.05	6.64574	-15.8818	-18.3996
2013-08-07 07:09:15	15.59	18.06	6.65268	-15.8919	-18.4098
2013-08-07 07:19:15	15.63	18.08	6.65962	-15.9327	-18.4302
2013-08-07 07:29:15	15.63	18.08	6.66657	-15.9327	-18.4302	2013-08-07 07:29:15
2013-08-07 07:39:15	15.63	18.09	6.67351	-15.9327	-18.4404
2013-08-07 07:49:15	15.66	18.11	6.68046	-15.9633	-18.4608
2013-08-07 07:59:15	15.67	18.12	6.6874	-15.9735	-18.4709
2013-08-07 08:09:15	15.67	18.13	6.69435	-15.9735	-18.4811
2013-08-07 08:19:15	15.69	18.15	6.70129	-15.9939	-18.5015
2013-08-07 08:29:15	15.73	18.19	6.70824	-16.0347	-18.5423	2013-08-07 08:29:15
2013-08-07 08:39:15	15.75	18.2	6.71518	-16.055	-18.5525
2013-08-07 08:49:15	15.76	18.21	6.72212	-16.0652	-18.5627
2013-08-07 08:59:15	15.76	18.23	6.72907	-16.0652	-18.5831
2013-08-07 09:09:15	15.79	18.24	6.73601	-16.0958	-18.5933
2013-08-07 09:19:15	15.8	18.25	6.74296	-16.106	-18.6035
2013-08-07 09:29:15	15.81	18.27	6.7499	-16.1162	-18.6239	2013-08-07 09:29:15
2013-08-07 09:39:15	15.83	18.28	6.75685	-16.1366	-18.634
2013-08-07 09:49:15	15.84	18.29	6.76379	-16.1468	-18.6442
2013-08-07 09:59:15	15.85	18.31	6.77074	-16.157	-18.6646
2013-08-07 10:09:15	15.85	18.31	6.77768	-16.157	-18.6646
2013-08-07 10:19:15	15.88	18.33	6.78462	-16.1876	-18.685
2013-08-07 10:29:15	15.89	18.34	6.79157	-16.1978	-18.6952	2013-08-07 10:29:15
2013-08-07 10:39:15	15.91	18.36	6.79851	-16.2181	-18.7156
2013-08-07 10:49:15	15.89	18.27	6.80546	-16.1978	-18.6239
2013-08-07 10:59:15	15.92	18.38	6.8124	-16.2283	-18.736
2013-08-07 11:09:15	15.94	18.39	6.81935	-16.2487	-18.7462
2013-08-07 11:19:15	15.95	18.41	6.82629	-16.2589	-18.7666
2013-08-07 11:29:15	15.96	18.42	6.83324	-16.2691	-18.7768	2013-08-07 11:29:15
2013-08-07 11:39:15	15.98	18.43	6.84018	-16.2895	-18.787
2013-08-07 11:49:15	15.99	18.45	6.84712	-16.2997	-18.8073
2013-08-07 11:59:15	16	18.45	6.85407	-16.3099	-18.8073
2013-08-07 12:09:15	16	18.46	6.86101	-16.3099	-18.8175
2013-08-07 12:19:15	16.02	18.47	6.86796	-16.3303	-18.8277
2013-08-07 12:29:15	16.03	18.49	6.8749	-16.3405	-18.8481	2013-08-07 12:29:15
2013-08-07 12:39:15	16.05	18.5	6.88185	-16.3609	-18.8583
2013-08-07 12:49:15	16.06	18.51	6.88879	-16.371	-18.8685
2013-08-07 12:59:15	16.07	18.53	6.89574	-16.3812	-18.8889
2013-08-07 13:09:15	16.1	18.53	6.90268	-16.4118	-18.8889
2013-08-07 13:19:15	15.99	18.45	6.90962	-16.2997	-18.8073
2013-08-07 13:29:15	16.06	18.53	6.91657	-16.371	-18.8889	2013-08-07 13:29:15
2013-08-07 13:39:15	16.09	18.55	6.92351	-16.4016	-18.9093
2013-08-07 13:49:15	16.11	18.56	6.93046	-16.422	-18.9195
2013-08-07 13:59:15	16.11	18.58	6.9374	-16.422	-18.9399
2013-08-07 14:09:15	16.13	18.58	6.94435	-16.4424	-18.9399
2013-08-07 14:19:15	16.14	18.61	6.95129	-16.4526	-18.9704
2013-08-07 14:29:15	16.15	18.61	6.95824	-16.4628	-18.9704	2013-08-07 14:29:15
2013-08-07 14:39:15	16.16	18.62	6.96518	-16.473	-18.9806
2013-08-07 14:49:15	16.18	18.64	6.97212	-16.4934	-19.001
2013-08-07 14:59:15	16.19	18.65	6.97907	-16.5036	-19.0112
2013-08-07 15:09:15	16.2	18.66	6.98601	-16.5138	-19.0214
2013-08-07 15:19:15	16.21	18.67	6.99296	-16.524	-19.0316
2013-08-07 15:29:15	16.23	18.69	6.9999	-16.5443	-19.052	2013-08-07 15:29:15
2013-08-07 15:39:15	16.24	18.7	7.00685	-16.5545	-19.0622
2013-08-07 15:49:15	16.24	18.71	7.01379	-16.5545	-19.0724
2013-08-07 15:59:15	16.27	18.73	7.02074	-16.5851	-19.0928
2013-08-07 16:09:15	16.27	18.73	7.02768	-16.5851	-19.0928
2013-08-07 16:19:15	16.27	18.75	7.03462	-16.5851	-19.1131
2013-08-07 16:29:15	16.3	18.76	7.04157	-16.6157	-19.1233	2013-08-07 16:29:15
2013-08-07 16:39:15	16.3	18.77	7.04851	-16.6157	-19.1335
2013-08-07 16:49:15	16.32	18.78	7.05546	-16.6361	-19.1437
2013-08-07 16:59:15	16.34	18.81	7.0624	-16.6565	-19.1743
2013-08-07 17:09:15	16.36	18.81	7.06935	-16.6769	-19.1743
2013-08-07 17:19:15	16.36	18.82	7.07629	-16.6769	-19.1845
2013-08-07 17:29:15	16.38	18.83	7.08324	-16.6972	-19.1947	2013-08-07 17:29:15
2013-08-07 17:39:15	16.4	18.85	7.09018	-16.7176	-19.2151
2013-08-07 17:49:15	16.4	18.87	7.09712	-16.7176	-19.2355
2013-08-07 17:59:15	16.42	18.88	7.10407	-16.738	-19.2457
2013-08-07 18:09:15	16.42	18.88	7.11101	-16.738	-19.2457
2013-08-07 18:19:15	16.44	18.89	7.11796	-16.7584	-19.2559
2013-08-07 18:29:15	16.46	18.91	7.1249	-16.7788	-19.2762	2013-08-07 18:29:15
2013-08-07 18:39:15	16.46	18.92	7.13185	-16.7788	-19.2864
2013-08-07 18:49:15	16.46	18.92	7.13879	-16.7788	-19.2864
2013-08-07 18:59:15	16.48	18.94	7.14574	-16.7992	-19.3068
2013-08-07 19:09:15	16.5	18.96	7.15268	-16.8196	-19.3272
2013-08-07 19:19:15	16.51	18.97	7.15962	-16.8298	-19.3374
2013-08-07 19:29:15	16.1	18.65	7.16657	-16.4118	-19.0112	2013-08-07 19:29:15
2013-08-07 19:39:15	16.59	19.06	7.17351	-16.9113	-19.4292
2013-08-07 19:49:15	16.57	19.03	7.18046	-16.8909	-19.3986
2013-08-07 19:59:15	16.57	19.01	7.1874	-16.8909	-19.3782
2013-08-07 20:09:15	16.56	19.02	7.19435	-16.8807	-19.3884
2013-08-07 20:19:15	16.57	19.02	7.20129	-16.8909	-19.3884
2013-08-07 20:29:15	16.58	19.04	7.20824	-16.9011	-19.4088	2013-08-07 20:29:15
2013-08-07 20:39:15	16.58	19.05	7.21518	-16.9011	-19.419
2013-08-07 20:49:15	16.59	19.06	7.22212	-16.9113	-19.4292
2013-08-07 20:59:15	16.62	19.07	7.22907	-16.9419	-19.4393
2013-08-07 21:09:15	16.63	19.08	7.23601	-16.9521	-19.4495
2013-08-07 21:19:15	16.64	19.1	7.24296	-16.9623	-19.4699
2013-08-07 21:29:15	16.65	19.11	7.2499	-16.9725	-19.4801	2013-08-07 21:29:15
2013-08-07 21:39:15	16.66	19.12	7.25685	-16.9827	-19.4903
2013-08-07 21:49:15	16.67	19.13	7.26379	-16.9929	-19.5005
2013-08-07 21:59:15	16.7	19.14	7.27074	-17.0234	-19.5107
2013-08-07 22:09:15	16.71	19.16	7.27768	-17.0336	-19.5311
2013-08-07 22:19:15	16.71	19.17	7.28462	-17.0336	-19.5413
2013-08-07 22:29:15	16.74	19.19	7.29157	-17.0642	-19.5617	2013-08-07 22:29:15
2013-08-07 22:39:15	16.74	19.19	7.29851	-17.0642	-19.5617
2013-08-07 22:49:15	16.75	19.2	7.30546	-17.0744	-19.5719
2013-08-07 22:59:15	16.75	19.21	7.3124	-17.0744	-19.5821
2013-08-07 23:09:15	16.77	19.23	7.31935	-17.0948	-19.6024
2013-08-07 23:19:15	16.79	19.24	7.32629	-17.1152	-19.6126
2013-08-07 23:29:15	16.79	19.25	7.33324	-17.1152	-19.6228	2013-08-07 23:29:15
2013-08-07 23:39:15	16.81	19.27	7.34018	-17.1356	-19.6432
2013-08-07 23:49:15	16.78	19.23	7.34712	-17.105	-19.6024
2013-08-07 23:59:15	16.79	19.24	7.35407	-17.1152	-19.6126
2013-08-08 00:09:15	16.8	19.26	7.36101	-17.1254	-19.633
2013-08-08 00:19:15	16.81	19.26	7.36796	-17.1356	-19.633
2013-08-08 00:29:15	16.84	19.28	7.3749	-17.1662	-19.6534	2013-08-08 00:29:15
2013-08-08 00:39:15	16.86	19.31	7.38185	-17.1865	-19.684
2013-08-08 00:49:15	16.86	19.31	7.38879	-17.1865	-19.684
2013-08-08 00:59:15	16.87	19.32	7.39574	-17.1967	-19.6942
2013-08-08 01:09:15	16.87	19.34	7.40268	-17.1967	-19.7146
2013-08-08 01:29:15	16.9	19.36	7.41657	-17.2273	-19.735
2013-08-08 01:39:15	16.91	19.38	7.42351	-17.2375	-19.7554	2013-08-08 01:39:15
2013-08-08 01:49:15	16.93	19.38	7.43046	-17.2579	-19.7554
2013-08-08 01:59:15	16.94	19.39	7.4374	-17.2681	-19.7655
2013-08-08 02:09:15	16.95	19.41	7.44435	-17.2783	-19.7859
2013-08-08 02:19:15	16.98	19.43	7.45129	-17.3089	-19.8063
2013-08-08 02:29:15	16.96	19.43	7.45824	-17.2885	-19.8063
2013-08-08 02:39:15	16.97	19.43	7.46518	-17.2987	-19.8063	2013-08-08 02:39:15
2013-08-08 02:49:15	16.99	19.45	7.47212	-17.3191	-19.8267
2013-08-08 02:59:15	16.99	19.46	7.47907	-17.3191	-19.8369
2013-08-08 03:09:15	17.01	19.48	7.48601	-17.3394	-19.8573
2013-08-08 03:19:15	17.02	19.48	7.49296	-17.3496	-19.8573
2013-08-08 03:29:15	17.02	19.49	7.4999	-17.3496	-19.8675
2013-08-08 03:39:15	17.05	19.51	7.50685	-17.3802	-19.8879	2013-08-08 03:39:15
2013-08-08 03:49:15	17.06	19.52	7.51379	-17.3904	-19.8981
2013-08-08 03:59:15	17.07	19.53	7.52074	-17.4006	-19.9083
2013-08-08 04:09:15	17.08	19.55	7.52768	-17.4108	-19.9286
2013-08-08 04:19:15	17.08	19.55	7.53462	-17.4108	-19.9286
2013-08-08 04:29:15	17.11	19.56	7.54157	-17.4414	-19.9388
2013-08-08 04:39:15	17.11	19.58	7.54851	-17.4414	-19.9592	2013-08-08 04:39:15
2013-08-08 04:49:15	17.12	19.58	7.55546	-17.4516	-19.9592
2013-08-08 04:59:15	17.13	19.6	7.5624	-17.4618	-19.9796
2013-08-08 05:09:15	17.14	19.61	7.56935	-17.472	-19.9898
2013-08-08 05:19:15	17.16	19.62	7.57629	-17.4924	-20
2013-08-08 05:29:15	17.16	19.63	7.58324	-17.4924	-20.0102
2013-08-08 05:39:15	17.17	19.65	7.59018	-17.5025	-20.0306	2013-08-08 05:39:15
2013-08-08 05:49:15	17.19	19.65	7.59712	-17.5229	-20.0306
2013-08-08 05:59:15	17.2	19.66	7.60407	-17.5331	-20.0408
2013-08-08 06:09:15	17.21	19.67	7.61101	-17.5433	-20.051
2013-08-08 06:19:15	17.23	19.69	7.61796	-17.5637	-20.0714
2013-08-08 06:29:15	17.25	19.7	7.6249	-17.5841	-20.0815
2013-08-08 06:39:15	17.25	19.71	7.63185	-17.5841	-20.0917	2013-08-08 06:39:15
2013-08-08 06:49:15	17.26	19.72	7.63879	-17.5943	-20.1019
2013-08-08 06:59:15	17.29	19.74	7.64574	-17.6249	-20.1223
2013-08-08 07:09:15	17.29	19.75	7.65268	-17.6249	-20.1325
2013-08-08 07:19:15	17.3	19.77	7.65962	-17.6351	-20.1529
2013-08-08 07:29:15	17.32	19.77	7.66657	-17.6555	-20.1529
2013-08-08 07:39:15	17.32	19.78	7.67351	-17.6555	-20.1631	2013-08-08 07:39:15
2013-08-08 07:49:15	17.33	19.8	7.68046	-17.6656	-20.1835
2013-08-08 07:59:15	17.36	19.82	7.6874	-17.6962	-20.2039
2013-08-08 08:09:15	17.38	19.82	7.69435	-17.7166	-20.2039
2013-08-08 08:19:15	17.39	19.83	7.70129	-17.7268	-20.2141
2013-08-08 08:29:15	17.32	19.79	7.70824	-17.6555	-20.1733
2013-08-08 08:39:15	17.44	19.89	7.71518	-17.7778	-20.2752	2013-08-08 08:39:15
2013-08-08 08:49:15	17.46	19.9	7.72212	-17.7982	-20.2854
2013-08-08 08:59:15	17.48	19.94	7.72907	-17.8186	-20.3262
2013-08-08 09:09:15	17.49	19.94	7.73601	-17.8287	-20.3262
2013-08-08 09:19:15	17.49	19.94	7.74296	-17.8287	-20.3262
2013-08-08 09:29:15	17.52	19.96	7.7499	-17.8593	-20.3466
2013-08-08 09:39:15	17.52	19.97	7.75685	-17.8593	-20.3568	2013-08-08 09:39:15
2013-08-08 09:49:15	17.53	19.99	7.76379	-17.8695	-20.3772
2013-08-08 09:59:15	17.55	20	7.77074	-17.8899	-20.3874
2013-08-08 10:09:15	17.56	20.02	7.77768	-17.9001	-20.4077
2013-08-08 10:19:15	17.57	20.03	7.78462	-17.9103	-20.4179
2013-08-08 10:29:15	17.6	20.05	7.79157	-17.9409	-20.4383
2013-08-08 10:39:15	17.61	20.06	7.79851	-17.9511	-20.4485	2013-08-08 10:39:15
2013-08-08 10:49:15	17.62	20.07	7.80546	-17.9613	-20.4587
2013-08-08 10:59:15	17.63	20.08	7.8124	-17.9715	-20.4689
2013-08-08 11:09:15	17.65	20.1	7.81935	-17.9918	-20.4893
2013-08-08 11:19:15	17.66	20.11	7.82629	-18.002	-20.4995
2013-08-08 11:29:15	17.68	20.14	7.83324	-18.0224	-20.5301
2013-08-08 11:39:15	17.67	20.13	7.84018	-18.0122	-20.5199	2013-08-08 11:39:15
2013-08-08 11:49:15	17.72	20.18	7.84712	-18.0632	-20.5708
2013-08-08 11:59:15	17.71	20.17	7.85407	-18.053	-20.5607
2013-08-08 12:09:15	17.74	20.18	7.86101	-18.0836	-20.5708
2013-08-08 12:19:15	17.75	20.19	7.86796	-18.0938	-20.581
2013-08-08 12:29:15	17.76	20.21	7.8749	-18.104	-20.6014
2013-08-08 12:39:15	17.78	20.23	7.88185	-18.1244	-20.6218	2013-08-08 12:39:15
2013-08-08 12:49:15	17.81	20.24	7.88879	-18.1549	-20.632
2013-08-08 12:59:15	17.82	20.26	7.89574	-18.1651	-20.6524
2013-08-08 13:09:15	17.82	20.27	7.90268	-18.1651	-20.6626
2013-08-08 13:19:15	17.83	20.29	7.90962	-18.1753	-20.683
2013-08-08 13:29:15	17.85	20.3	7.91657	-18.1957	-20.6932
2013-08-08 13:39:15	17.86	20.31	7.92351	-18.2059	-20.7034	2013-08-08 13:39:15
2013-08-08 13:49:15	17.89	20.34	7.93046	-18.2365	-20.7339
2013-08-08 13:59:15	17.9	20.34	7.9374	-18.2467	-20.7339
2013-08-08 14:09:15	17.92	20.35	7.94435	-18.2671	-20.7441
2013-08-08 14:19:15	17.93	20.39	7.95129	-18.2773	-20.7849
2013-08-08 14:29:15	17.94	20.39	7.95824	-18.2875	-20.7849
2013-08-08 14:39:15	17.96	20.42	7.96518	-18.3078	-20.8155	2013-08-08 14:39:15
2013-08-08 14:49:15	17.97	20.43	7.97212	-18.318	-20.8257
2013-08-08 14:59:15	18	20.44	7.97907	-18.3486	-20.8359
2013-08-08 15:09:15	18.01	20.46	7.98601	-18.3588	-20.8563
2013-08-08 15:19:15	18.02	20.47	7.99296	-18.369	-20.8665
2013-08-08 15:29:15	18.03	20.49	7.9999	-18.3792	-20.8869
2013-08-08 15:39:15	18.05	20.51	8.00685	-18.3996	-20.9072	2013-08-08 15:39:15
2013-08-08 15:49:15	18.08	20.53	8.01379	-18.4302	-20.9276
2013-08-08 15:59:15	18.09	20.54	8.02074	-18.4404	-20.9378
2013-08-08 16:09:15	18.1	20.56	8.02768	-18.4506	-20.9582
2013-08-08 16:19:15	18.13	20.57	8.03462	-18.4811	-20.9684
2013-08-08 16:29:15	18.14	20.59	8.04157	-18.4913	-20.9888
2013-08-08 16:39:15	18.15	20.6	8.04851	-18.5015	-20.999	2013-08-08 16:39:15
2013-08-08 16:49:15	18.16	20.62	8.05546	-18.5117	-21.0194
2013-08-08 16:59:15	18.18	20.63	8.0624	-18.5321	-21.0296
2013-08-08 17:09:15	18.19	20.66	8.06935	-18.5423	-21.0601
2013-08-08 17:19:15	18.21	20.66	8.07629	-18.5627	-21.0601
2013-08-08 17:29:15	18.23	20.69	8.08324	-18.5831	-21.0907
2013-08-08 17:39:15	18.25	20.71	8.09018	-18.6035	-21.1111	2013-08-08 17:39:15
2013-08-08 17:49:15	18.25	20.71	8.09712	-18.6035	-21.1111
2013-08-08 17:59:15	18.28	20.73	8.10407	-18.634	-21.1315
2013-08-08 18:09:15	18.29	20.74	8.11101	-18.6442	-21.1417
2013-08-08 18:19:15	18.31	20.75	8.11796	-18.6646	-21.1519
2013-08-08 18:29:15	18.33	20.79	8.1249	-18.685	-21.1927
2013-08-08 18:39:15	18.35	20.81	8.13185	-18.7054	-21.213	2013-08-08 18:39:15
2013-08-08 18:49:15	18.37	20.82	8.13879	-18.7258	-21.2232
2013-08-08 18:59:15	18.38	20.84	8.14574	-18.736	-21.2436
2013-08-08 19:09:15	18.39	20.85	8.15268	-18.7462	-21.2538
2013-08-08 19:19:15	18.42	20.87	8.15962	-18.7768	-21.2742
2013-08-08 19:29:15	18.44	20.89	8.16657	-18.7971	-21.2946
2013-08-08 19:39:15	18.45	20.91	8.17351	-18.8073	-21.315	2013-08-08 19:39:15
2013-08-08 19:49:15	18.47	20.92	8.18046	-18.8277	-21.3252
2013-08-08 19:59:15	18.44	20.91	8.1874	-18.7971	-21.315
2013-08-08 20:09:15	18.48	20.95	8.19435	-18.8379	-21.3558
2013-08-08 20:19:15	18.5	20.96	8.20129	-18.8583	-21.366
2013-08-08 20:29:15	18.52	20.99	8.20824	-18.8787	-21.3965
2013-08-08 20:39:15	18.54	20.99	8.21518	-18.8991	-21.3965	2013-08-08 20:39:15
2013-08-08 20:49:15	18.56	21.01	8.22212	-18.9195	-21.4169
2013-08-08 20:59:15	18.59	21.04	8.22907	-18.9501	-21.4475
2013-08-08 21:09:15	18.61	21.05	8.23601	-18.9704	-21.4577
2013-08-08 21:19:15	18.58	21.03	8.24296	-18.9399	-21.4373
2013-08-08 21:29:15	18.6	21.05	8.2499	-18.9602	-21.4577
2013-08-08 21:39:15	18.61	21.07	8.25685	-18.9704	-21.4781	2013-08-08 21:39:15
2013-08-08 21:49:15	18.65	21.1	8.26379	-19.0112	-21.5087
2013-08-08 21:59:15	18.64	21.11	8.27074	-19.001	-21.5189
2013-08-08 22:09:15	18.67	21.13	8.27768	-19.0316	-21.5392
2013-08-08 22:19:15	18.68	21.15	8.28462	-19.0418	-21.5596
2013-08-08 22:29:15	18.69	21.17	8.29157	-19.052	-21.58
2013-08-08 22:39:15	18.73	21.19	8.29851	-19.0928	-21.6004	2013-08-08 22:39:15
2013-08-08 22:49:15	18.75	21.2	8.30546	-19.1131	-21.6106
2013-08-08 22:59:15	18.76	21.22	8.3124	-19.1233	-21.631
2013-08-08 23:09:15	18.77	21.24	8.31935	-19.1335	-21.6514
2013-08-08 23:19:15	18.79	21.26	8.32629	-19.1539	-21.6718
2013-08-08 23:29:15	18.82	21.28	8.33324	-19.1845	-21.6922
2013-08-08 23:39:15	18.85	21.29	8.34018	-19.2151	-21.7023	2013-08-08 23:39:15
2013-08-08 23:49:15	18.86	21.32	8.34712	-19.2253	-21.7329
2013-08-08 23:59:15	18.87	21.33	8.35407	-19.2355	-21.7431
2013-08-09 00:09:15	18.89	21.35	8.36101	-19.2559	-21.7635
2013-08-09 00:19:15	18.9	21.37	8.36796	-19.2661	-21.7839
2013-08-09 00:29:15	18.92	21.39	8.3749	-19.2864	-21.8043
2013-08-09 00:39:15	18.94	21.41	8.38185	-19.3068	-21.8247	2013-08-09 00:39:15
2013-08-09 00:49:15	18.96	21.43	8.38879	-19.3272	-21.8451
2013-08-09 00:59:15	18.99	21.45	8.39574	-19.3578	-21.8654
2013-08-09 01:09:15	19.01	21.47	8.40268	-19.3782	-21.8858
2013-08-09 01:19:15	19.03	21.49	8.40962	-19.3986	-21.9062
2013-08-09 01:29:15	19.05	21.51	8.41657	-19.419	-21.9266
2013-08-09 01:39:15	19.07	21.53	8.42351	-19.4393	-21.947	2013-08-09 01:39:15
2013-08-09 01:49:15	19.09	21.55	8.43046	-19.4597	-21.9674
2013-08-09 01:59:15	19.1	21.57	8.4374	-19.4699	-21.9878
2013-08-09 02:09:15	19.12	21.59	8.44435	-19.4903	-22.0082
2013-08-09 02:19:15	19.15	21.6	8.45129	-19.5209	-22.0183
2013-08-09 02:29:15	19.16	21.63	8.45824	-19.5311	-22.0489
2013-08-09 02:39:15	19.18	21.64	8.46518	-19.5515	-22.0591	2013-08-09 02:39:15
2013-08-09 02:49:15	19.2	21.67	8.47212	-19.5719	-22.0897
2013-08-09 02:59:15	19.22	21.68	8.47907	-19.5923	-22.0999
2013-08-09 03:09:15	19.24	21.71	8.48601	-19.6126	-22.1305
2013-08-09 03:19:15	19.26	21.72	8.49296	-19.633	-22.1407
2013-08-09 03:29:15	19.28	21.75	8.4999	-19.6534	-22.1713
2013-08-09 03:39:15	19.3	21.77	8.50685	-19.6738	-22.1916	2013-08-09 03:39:15
2013-08-09 03:49:15	19.33	21.79	8.51379	-19.7044	-22.212
2013-08-09 03:59:15	19.34	21.81	8.52074	-19.7146	-22.2324
2013-08-09 04:09:15	19.37	21.83	8.52768	-19.7452	-22.2528
2013-08-09 04:19:15	19.4	21.85	8.53462	-19.7757	-22.2732
2013-08-09 04:29:15	19.41	21.88	8.54157	-19.7859	-22.3038
2013-08-09 04:39:15	19.43	21.9	8.54851	-19.8063	-22.3242	2013-08-09 04:39:15
2013-08-09 04:49:15	19.46	21.92	8.55546	-19.8369	-22.3445
2013-08-09 04:59:15	19.48	21.95	8.5624	-19.8573	-22.3751
2013-08-09 05:09:15	19.51	21.98	8.56935	-19.8879	-22.4057
2013-08-09 05:19:15	19.52	21.99	8.57629	-19.8981	-22.4159
2013-08-09 05:29:15	19.55	22	8.58324	-19.9286	-22.4261
2013-08-09 05:39:15	19.58	22.04	8.59018	-19.9592	-22.4669	2013-08-09 05:39:15
2013-08-09 05:49:15	19.59	22.05	8.59712	-19.9694	-22.4771
2013-08-09 05:59:15	19.62	22.06	8.60407	-20	-22.4873
2013-08-09 06:09:15	19.64	22.1	8.61101	-20.0204	-22.528
2013-08-09 06:19:15	19.66	22.13	8.61796	-20.0408	-22.5586
2013-08-09 06:29:15	19.69	22.15	8.6249	-20.0714	-22.579
2013-08-09 06:39:15	19.71	22.17	8.63185	-20.0917	-22.5994	2013-08-09 06:39:15
2013-08-09 06:49:15	19.74	22.2	8.63879	-20.1223	-22.63
2013-08-09 06:59:15	19.75	22.22	8.64574	-20.1325	-22.6504
2013-08-09 07:09:15	19.78	22.24	8.65268	-20.1631	-22.6707
2013-08-09 07:19:15	19.81	22.26	8.65962	-20.1937	-22.6911
2013-08-09 07:29:15	19.82	22.28	8.66657	-20.2039	-22.7115
2013-08-09 07:39:15	19.84	22.3	8.67351	-20.2243	-22.7319	2013-08-09 07:39:15
2013-08-09 07:49:15	19.84	22.31	8.68046	-20.2243	-22.7421
2013-08-09 07:59:15	19.86	22.33	8.6874	-20.2446	-22.7625
2013-08-09 08:09:15	19.89	22.35	8.69435	-20.2752	-22.7829
2013-08-09 08:19:15	19.92	22.36	8.70129	-20.3058	-22.7931
2013-08-09 08:29:15	19.94	22.39	8.70824	-20.3262	-22.8236
2013-08-09 08:39:15	19.96	22.42	8.71518	-20.3466	-22.8542	2013-08-09 08:39:15
2013-08-09 08:49:15	19.98	22.44	8.72212	-20.367	-22.8746
2013-08-09 08:59:15	20.01	22.47	8.72907	-20.3976	-22.9052
2013-08-09 09:09:15	20.03	22.5	8.73601	-20.4179	-22.9358
2013-08-09 09:19:15	20.06	22.52	8.74296	-20.4485	-22.9562
2013-08-09 09:29:15	19.64	22.16	8.7499	-20.0204	-22.5892
2013-08-09 09:39:15	20.14	22.6	8.75685	-20.5301	-23.0377	2013-08-09 09:39:15
2013-08-09 09:49:15	20.17	22.63	8.76379	-20.5607	-23.0683
2013-08-09 09:59:15	20.17	22.62	8.77074	-20.5607	-23.0581
2013-08-09 10:09:15	20.19	22.64	8.77768	-20.581	-23.0785
2013-08-09 10:19:15	20.23	22.66	8.78462	-20.6218	-23.0989
2013-08-09 10:29:15	20.24	22.69	8.79157	-20.632	-23.1295
2013-08-09 10:39:15	20.28	22.72	8.79851	-20.6728	-23.16	2013-08-09 10:39:15
2013-08-09 10:49:15	20.28	22.73	8.80546	-20.6728	-23.1702
2013-08-09 11:09:15	20.35	22.79	8.81935	-20.7441	-23.2314
2013-08-09 11:19:15	20.38	22.83	8.82629	-20.7747	-23.2722
2013-08-09 11:29:15	20.41	22.85	8.83324	-20.8053	-23.2926
2013-08-09 11:39:15	20.42	22.85	8.84018	-20.8155	-23.2926
2013-08-09 11:49:15	20.46	22.91	8.84712	-20.8563	-23.3537	2013-08-09 11:49:15
2013-08-09 11:59:15	20.48	22.93	8.85407	-20.8767	-23.3741
2013-08-09 12:09:15	20.52	22.98	8.86101	-20.9174	-23.4251
2013-08-09 12:19:15	20.55	22.99	8.86796	-20.948	-23.4353
2013-08-09 12:29:15	20.56	23.03	8.8749	-20.9582	-23.476
2013-08-09 12:39:15	20.6	23.05	8.88185	-20.999	-23.4964
2013-08-09 12:49:15	20.63	23.09	8.88879	-21.0296	-23.5372	2013-08-09 12:49:15
2013-08-09 12:59:15	20.66	23.11	8.89574	-21.0601	-23.5576
2013-08-09 13:09:15	20.68	23.14	8.90268	-21.0805	-23.5882
2013-08-09 13:19:15	20.59	23.05	8.90962	-20.9888	-23.4964
2013-08-09 13:29:15	20.72	23.18	8.91657	-21.1213	-23.629
2013-08-09 13:39:15	20.7	23.17	8.92351	-21.1009	-23.6188
2013-08-09 13:49:15	20.73	23.2	8.93046	-21.1315	-23.6493	2013-08-09 13:49:15
2013-08-09 13:59:15	20.76	23.23	8.9374	-21.1621	-23.6799
2013-08-09 14:09:15	20.8	23.26	8.94435	-21.2029	-23.7105
2013-08-09 14:19:15	20.82	23.28	8.95129	-21.2232	-23.7309
2013-08-09 14:29:15	20.86	23.32	8.95824	-21.264	-23.7717
2013-08-09 14:39:15	20.9	23.36	8.96518	-21.3048	-23.8124
2013-08-09 14:49:15	20.93	23.4	8.97212	-21.3354	-23.8532	2013-08-09 14:49:15
2013-08-09 14:59:15	20.96	23.42	8.97907	-21.366	-23.8736
2013-08-09 15:09:15	21	23.46	8.98601	-21.4067	-23.9144
2013-08-09 15:19:15	21.03	23.49	8.99296	-21.4373	-23.945
2013-08-09 15:29:15	21.07	23.52	8.9999	-21.4781	-23.9755
2013-08-09 15:39:15	21.09	23.55	9.00685	-21.4985	-24.0061
2013-08-09 15:49:15	21.14	23.6	9.01379	-21.5494	-24.0571	2013-08-09 15:49:15
2013-08-09 15:59:15	21.15	23.63	9.02074	-21.5596	-24.0877
2013-08-09 16:09:15	21.21	23.66	9.02768	-21.6208	-24.1182
2013-08-09 16:19:15	21.24	23.7	9.03462	-21.6514	-24.159
2013-08-09 16:29:15	21.29	23.74	9.04157	-21.7023	-24.1998
2013-08-09 16:39:15	21.32	23.78	9.04851	-21.7329	-24.2406
2013-08-09 16:49:15	21.36	23.82	9.05546	-21.7737	-24.2813	2013-08-09 16:49:15
2013-08-09 16:59:15	21.39	23.86	9.0624	-21.8043	-24.3221
2013-08-09 17:09:15	21.44	23.89	9.06935	-21.8552	-24.3527
2013-08-09 17:19:15	21.47	23.94	9.07629	-21.8858	-24.4037
2013-08-09 17:29:15	21.51	23.98	9.08324	-21.9266	-24.4444
2013-08-09 17:39:15	21.54	24.02	9.09018	-21.9572	-24.4852
2013-08-09 17:49:15	21.59	24.05	9.09712	-22.0082	-24.5158	2013-08-09 17:49:15
2013-08-09 17:59:15	21.64	24.1	9.10407	-22.0591	-24.5668
2013-08-09 18:09:15	21.68	24.14	9.11101	-22.0999	-24.6075
2013-08-09 18:19:15	21.71	24.18	9.11796	-22.1305	-24.6483
2013-08-09 18:29:15	21.76	24.22	9.1249	-22.1814	-24.6891
2013-08-09 18:39:15	21.79	24.26	9.13185	-22.212	-24.7299
2013-08-09 18:49:15	21.84	24.31	9.13879	-22.263	-24.7808	2013-08-09 18:49:15
2013-08-09 18:59:15	21.88	24.34	9.14574	-22.3038	-24.8114
2013-08-09 19:09:15	21.92	24.39	9.15268	-22.3445	-24.8624
2013-08-09 19:19:15	21.96	24.43	9.15962	-22.3853	-24.9032
2013-08-09 19:29:15	22.02	24.47	9.16657	-22.4465	-24.9439
2013-08-09 19:39:15	22.05	24.5	9.17351	-22.4771	-24.9745
2013-08-09 19:49:15	22.08	24.53	9.18046	-22.5076	-25.0051	2013-08-09 19:49:15
2013-08-09 19:59:15	22.11	24.58	9.1874	-22.5382	-25.0561
2013-08-09 20:09:15	22.17	24.62	9.19435	-22.5994	-25.0968
2013-08-09 20:19:15	22.19	24.65	9.20129	-22.6198	-25.1274
2013-08-09 20:29:15	22.23	24.69	9.20824	-22.6606	-25.1682
2013-08-09 20:39:15	22.26	24.71	9.21518	-22.6911	-25.1886
2013-08-09 20:49:15	22.3	24.76	9.22212	-22.7319	-25.2396	2013-08-09 20:49:15
2013-08-09 20:59:15	22.33	24.78	9.22907	-22.7625	-25.2599
2013-08-09 21:09:15	22.36	24.82	9.23601	-22.7931	-25.3007
2013-08-09 21:19:15	22.39	24.85	9.24296	-22.8236	-25.3313
2013-08-09 21:29:15	22.42	24.89	9.2499	-22.8542	-25.3721
2013-08-09 21:39:15	22.47	24.93	9.25685	-22.9052	-25.4128
2013-08-09 21:49:15	22.51	24.96	9.26379	-22.946	-25.4434	2013-08-09 21:49:15
2013-08-09 21:59:15	22.52	24.99	9.27074	-22.9562	-25.474
2013-08-09 22:09:15	22.55	25.03	9.27768	-22.9867	-25.5148
2013-08-09 22:19:15	22.6	25.07	9.28462	-23.0377	-25.5556
2013-08-09 22:29:15	22.62	25.09	9.29157	-23.0581	-25.5759
2013-08-09 22:39:15	22.67	25.13	9.29851	-23.1091	-25.6167
2013-08-09 22:49:15	22.7	25.17	9.30546	-23.1397	-25.6575	2013-08-09 22:49:15
2013-08-09 22:59:15	22.74	25.2	9.3124	-23.1804	-25.6881
2013-08-09 23:09:15	22.78	25.23	9.31935	-23.2212	-25.7187
2013-08-09 23:19:15	22.8	25.26	9.32629	-23.2416	-25.7492
2013-08-09 23:29:15	22.84	25.31	9.33324	-23.2824	-25.8002
2013-08-09 23:39:15	22.88	25.34	9.34018	-23.3231	-25.8308
2013-08-09 23:49:15	22.91	25.37	9.34712	-23.3537	-25.8614	2013-08-09 23:49:15
2013-08-09 23:59:15	22.94	25.41	9.35407	-23.3843	-25.9021
2013-08-10 00:09:15	22.97	25.44	9.36101	-23.4149	-25.9327
2013-08-10 00:19:15	23.01	25.47	9.36796	-23.4557	-25.9633
2013-08-10 00:29:15	23.03	25.51	9.3749	-23.476	-26.0041
2013-08-10 00:39:15	23.08	25.55	9.38185	-23.527	-26.0449
2013-08-10 00:49:15	23.12	25.58	9.38879	-23.5678	-26.0754	2013-08-10 00:49:15
2013-08-10 00:59:15	23.16	25.6	9.39574	-23.6086	-26.0958
2013-08-10 01:09:15	23.2	25.66	9.40268	-23.6493	-26.157
2013-08-10 01:19:15	23.24	25.7	9.40962	-23.6901	-26.1978
2013-08-10 01:29:15	23.28	25.74	9.41657	-23.7309	-26.2385
2013-08-10 01:39:15	23.32	25.79	9.42351	-23.7717	-26.2895
2013-08-10 01:49:15	23.36	25.83	9.43046	-23.8124	-26.3303	2013-08-10 01:49:15
2013-08-10 01:59:15	23.4	25.87	9.4374	-23.8532	-26.371
2013-08-10 02:09:15	23.44	25.91	9.44435	-23.894	-26.4118
2013-08-10 02:19:15	23.47	25.94	9.45129	-23.9246	-26.4424
2013-08-10 02:29:15	23.52	25.99	9.45824	-23.9755	-26.4934
2013-08-10 02:39:15	23.55	26.02	9.46518	-24.0061	-26.524
2013-08-10 02:49:15	23.6	26.06	9.47212	-24.0571	-26.5647	2013-08-10 02:49:15
2013-08-10 02:59:15	23.64	26.09	9.47907	-24.0979	-26.5953
2013-08-10 03:09:15	23.68	26.14	9.48601	-24.1386	-26.6463
2013-08-10 03:19:15	23.72	26.19	9.49296	-24.1794	-26.6972
2013-08-10 03:29:15	23.76	26.22	9.4999	-24.2202	-26.7278
2013-08-10 03:39:15	23.81	26.26	9.50685	-24.2712	-26.7686
2013-08-10 03:49:15	23.83	26.3	9.51379	-24.2915	-26.8094	2013-08-10 03:49:15
2013-08-10 03:59:15	23.88	26.35	9.52074	-24.3425	-26.8603
2013-08-10 04:09:15	23.92	26.39	9.52768	-24.3833	-26.9011
2013-08-10 04:19:15	23.96	26.42	9.53462	-24.4241	-26.9317
2013-08-10 04:29:15	24	26.48	9.54157	-24.4648	-26.9929
2013-08-10 04:39:15	24.05	26.52	9.54851	-24.5158	-27.0336
2013-08-10 04:49:15	24.09	26.56	9.55546	-24.5566	-27.0744	2013-08-10 04:49:15
2013-08-10 04:59:15	24.12	26.6	9.5624	-24.5872	-27.1152
2013-08-10 05:09:15	24.16	26.64	9.56935	-24.6279	-27.156
2013-08-10 05:19:15	24.21	26.68	9.57629	-24.6789	-27.1967
2013-08-10 05:29:15	24.26	26.72	9.58324	-24.7299	-27.2375
2013-08-10 05:39:15	24.31	26.78	9.59018	-24.7808	-27.2987
2013-08-10 05:49:15	24.34	26.8	9.59712	-24.8114	-27.3191	2013-08-10 05:49:15
2013-08-10 05:59:15	24.38	26.85	9.60407	-24.8522	-27.37
2013-08-10 06:09:15	24.42	26.89	9.61101	-24.893	-27.4108
2013-08-10 06:19:15	24.47	26.94	9.61796	-24.9439	-27.4618
2013-08-10 06:29:15	24.53	26.98	9.6249	-25.0051	-27.5025
2013-08-10 06:39:15	24.55	27.02	9.63185	-25.0255	-27.5433
2013-08-10 06:49:15	24.59	27.06	9.63879	-25.0663	-27.5841	2013-08-10 06:49:15
2013-08-10 06:59:15	24.64	27.11	9.64574	-25.1172	-27.6351
2013-08-10 07:09:15	24.69	27.16	9.65268	-25.1682	-27.686
2013-08-10 07:19:15	24.74	27.2	9.65962	-25.2192	-27.7268
2013-08-10 07:29:15	24.78	27.25	9.66657	-25.2599	-27.7778
2013-08-10 07:39:15	24.81	27.28	9.67351	-25.2905	-27.8084
2013-08-10 07:49:15	24.87	27.34	9.68046	-25.3517	-27.8695	2013-08-10 07:49:15
2013-08-10 07:59:15	24.91	27.37	9.6874	-25.3925	-27.9001
2013-08-10 08:09:15	24.96	27.42	9.69435	-25.4434	-27.9511
2013-08-10 08:19:15	25.02	27.48	9.70129	-25.5046	-28.0122
2013-08-10 08:29:15	25.06	27.54	9.70824	-25.5454	-28.0734
2013-08-10 08:39:15	25.11	27.57	9.71518	-25.5963	-28.104
2013-08-10 08:49:15	25.16	27.62	9.72212	-25.6473	-28.1549	2013-08-10 08:49:15
2013-08-10 08:59:15	25.2	27.67	9.72907	-25.6881	-28.2059
2013-08-10 09:09:15	25.24	27.71	9.73601	-25.7288	-28.2467
2013-08-10 09:19:15	25.29	27.76	9.74296	-25.7798	-28.2977
2013-08-10 09:29:15	25.25	27.73	9.7499	-25.739	-28.2671
2013-08-10 09:39:15	25.37	27.82	9.75685	-25.8614	-28.3588
2013-08-10 09:49:15	25.4	27.86	9.76379	-25.8919	-28.3996	2013-08-10 09:49:15
2013-08-10 09:59:15	25.45	27.92	9.77074	-25.9429	-28.4608
2013-08-10 10:09:15	25.5	27.97	9.77768	-25.9939	-28.5117
2013-08-10 10:19:15	25.55	28.01	9.78462	-26.0449	-28.5525
2013-08-10 10:29:15	25.6	28.08	9.79157	-26.0958	-28.6239
2013-08-10 10:39:15	25.65	28.12	9.79851	-26.1468	-28.6646
2013-08-10 10:49:15	25.71	28.18	9.80546	-26.208	-28.7258	2013-08-10 10:49:15
2013-08-10 10:59:15	25.76	28.22	9.8124	-26.2589	-28.7666
2013-08-10 11:09:15	25.81	28.28	9.81935	-26.3099	-28.8277
2013-08-10 11:19:15	25.85	28.3	9.82629	-26.3507	-28.8481
2013-08-10 11:29:15	25.91	28.38	9.83324	-26.4118	-28.9297
2013-08-10 11:39:15	25.97	28.43	9.84018	-26.473	-28.9806
2013-08-10 11:49:15	26.02	28.49	9.84712	-26.524	-29.0418	2013-08-10 11:49:15
2013-08-10 11:59:15	26.06	28.55	9.85407	-26.5647	-29.103
2013-08-10 12:09:15	26.11	28.59	9.86101	-26.6157	-29.1437
2013-08-10 12:19:15	26.16	28.63	9.86796	-26.6667	-29.1845
2013-08-10 12:29:15	26.22	28.7	9.8749	-26.7278	-29.2559
2013-08-10 12:39:15	26.25	28.73	9.88185	-26.7584	-29.2864
2013-08-10 12:49:15	26.3	28.78	9.88879	-26.8094	-29.3374	2013-08-10 12:49:15
2013-08-10 12:59:15	26.35	28.83	9.89574	-26.8603	-29.3884
2013-08-10 13:09:15	26.42	28.88	9.90268	-26.9317	-29.4393
2013-08-10 13:19:15	26.46	28.95	9.90962	-26.9725	-29.5107
2013-08-10 13:29:15	26.51	28.98	9.91657	-27.0234	-29.5413
2013-08-10 13:39:15	26.55	29.02	9.92351	-27.0642	-29.5821
2013-08-10 13:49:15	26.6	29.06	9.93046	-27.1152	-29.6228	2013-08-10 13:49:15
2013-08-10 13:59:15	26.66	29.14	9.9374	-27.1764	-29.7044
2013-08-10 14:09:15	26.69	29.17	9.94435	-27.2069	-29.735
2013-08-10 14:19:15	26.76	29.24	9.95129	-27.2783	-29.8063
2013-08-10 14:29:15	26.81	29.29	9.95824	-27.3293	-29.8573
2013-08-10 14:39:15	26.88	29.35	9.96518	-27.4006	-29.9185
2013-08-10 14:49:15	26.92	29.4	9.97212	-27.4414	-29.9694	2013-08-10 14:49:15
2013-08-10 14:59:15	26.97	29.44	9.97907	-27.4924	-30.0102
2013-08-10 15:09:15	27.05	29.53	9.98601	-27.5739	-30.1019
2013-08-10 15:19:15	27.09	29.57	9.99296	-27.6147	-30.1427
2013-08-10 15:29:15	27.16	29.61	9.9999	-27.686	-30.1835
2013-08-10 15:39:15	27.2	29.69	10.0068	-27.7268	-30.265
2013-08-10 15:49:15	27.27	29.73	10.0138	-27.7982	-30.3058	2013-08-10 15:49:15
2013-08-10 15:59:15	27.34	29.82	10.0207	-27.8695	-30.3976
2013-08-10 16:09:15	27.38	29.87	10.0277	-27.9103	-30.4485
2013-08-10 16:19:15	27.46	29.95	10.0346	-27.9918	-30.5301
2013-08-10 16:29:15	27.56	30.03	10.0416	-28.0938	-30.6116
2013-08-10 16:39:15	27.6	30.08	10.0485	-28.1346	-30.6626
2013-08-10 16:49:15	27.66	30.13	10.0555	-28.1957	-30.7136	2013-08-10 16:49:15
2013-08-10 16:59:15	27.74	30.21	10.0624	-28.2773	-30.7951
2013-08-10 17:09:15	27.79	30.28	10.0693	-28.3282	-30.8665
2013-08-10 17:19:15	27.86	30.33	10.0763	-28.3996	-30.9174
2013-08-10 17:29:15	27.91	30.39	10.0832	-28.4506	-30.9786
2013-08-10 17:49:15	27.96	30.48	10.0971	-28.5015	-31.0703
2013-08-10 17:59:15	28.06	30.53	10.1041	-28.6035	-31.1213	2013-08-10 17:59:15
2013-08-10 18:09:15	28.12	30.6	10.111	-28.6646	-31.1927
2013-08-10 18:19:15	28.18	30.67	10.118	-28.7258	-31.264
2013-08-10 18:29:15	28.24	30.73	10.1249	-28.787	-31.3252
2013-08-10 18:39:15	28.32	30.79	10.1318	-28.8685	-31.3863
2013-08-10 18:49:15	28.39	30.87	10.1388	-28.9399	-31.4679
2013-08-10 18:59:15	28.46	30.94	10.1457	-29.0112	-31.5392	2013-08-10 18:59:15
2013-08-10 19:09:15	28.55	31.02	10.1527	-29.103	-31.6208
2013-08-10 19:19:15	28.6	31.09	10.1596	-29.1539	-31.6922
2013-08-10 19:29:15	28.65	31.14	10.1666	-29.2049	-31.7431
2013-08-10 19:39:15	28.74	31.23	10.1735	-29.2966	-31.8349
2013-08-10 19:49:15	28.8	31.28	10.1805	-29.3578	-31.8858
2013-08-10 19:59:15	28.84	31.33	10.1874	-29.3986	-31.9368	2013-08-10 19:59:15
2013-08-10 20:09:15	28.91	31.38	10.1943	-29.4699	-31.9878
2013-08-10 20:19:15	28.98	31.47	10.2013	-29.5413	-32.0795
2013-08-10 20:29:15	29.05	31.54	10.2082	-29.6126	-32.1509
2013-08-10 20:39:15	29.1	31.59	10.2152	-29.6636	-32.2018
2013-08-10 20:49:15	29.19	31.68	10.2221	-29.7554	-32.2936
2013-08-10 20:59:15	29.26	31.74	10.2291	-29.8267	-32.3547	2013-08-10 20:59:15
2013-08-10 21:09:15	29.3	31.8	10.236	-29.8675	-32.4159
2013-08-10 21:19:15	29.38	31.88	10.243	-29.949	-32.4975
2013-08-10 21:29:15	29.46	31.95	10.2499	-30.0306	-32.5688
2013-08-10 21:39:15	29.51	32	10.2568	-30.0815	-32.6198
2013-08-10 21:49:15	29.59	32.07	10.2638	-30.1631	-32.6911
2013-08-10 21:59:15	29.65	32.15	10.2707	-30.2243	-32.7727	2013-08-10 21:59:15
2013-08-10 22:09:15	29.72	32.2	10.2777	-30.2956	-32.8236
2013-08-10 22:19:15	29.79	32.29	10.2846	-30.367	-32.9154
2013-08-10 22:29:15	29.86	32.35	10.2916	-30.4383	-32.9766
2013-08-10 22:39:15	29.95	32.45	10.2985	-30.5301	-33.0785
2013-08-10 22:49:15	30.01	32.51	10.3055	-30.5912	-33.1397
2013-08-10 22:59:15	30.09	32.58	10.3124	-30.6728	-33.211	2013-08-10 22:59:15
2013-08-10 23:09:15	30.15	32.65	10.3193	-30.7339	-33.2824
2013-08-10 23:19:15	30.21	32.7	10.3263	-30.7951	-33.3333
2013-08-10 23:29:15	30.27	32.78	10.3332	-30.8563	-33.4149
2013-08-10 23:39:15	30.37	32.88	10.3402	-30.9582	-33.5168
2013-08-10 23:49:15	30.44	32.94	10.3471	-31.0296	-33.578
2013-08-10 23:59:15	30.49	33	10.3541	-31.0805	-33.6391	2013-08-10 23:59:15
2013-08-11 00:09:15	30.59	33.07	10.361	-31.1825	-33.7105
2013-08-11 00:19:15	30.64	33.14	10.368	-31.2334	-33.7819
2013-08-11 00:29:15	30.72	33.23	10.3749	-31.315	-33.8736
2013-08-11 00:39:15	30.8	33.3	10.3818	-31.3965	-33.945
2013-08-11 00:49:15	30.89	33.38	10.3888	-31.4883	-34.0265
2013-08-11 00:59:15	30.96	33.45	10.3957	-31.5596	-34.0979	2013-08-11 00:59:15
2013-08-11 01:09:15	31.04	33.53	10.4027	-31.6412	-34.1794
2013-08-11 01:19:15	31.09	33.6	10.4096	-31.6922	-34.2508
2013-08-11 01:29:15	31.18	33.68	10.4166	-31.7839	-34.3323
2013-08-11 01:39:15	31.27	33.77	10.4235	-31.8756	-34.4241
2013-08-11 01:49:15	31.33	33.85	10.4305	-31.9368	-34.5056
2013-08-11 01:59:15	31.44	33.94	10.4374	-32.0489	-34.5973	2013-08-11 01:59:15
2013-08-11 02:09:15	31.52	34.01	10.4443	-32.1305	-34.6687
2013-08-11 02:19:15	31.61	34.13	10.4513	-32.2222	-34.791
2013-08-11 02:29:15	31.7	34.2	10.4582	-32.314	-34.8624
2013-08-11 02:39:15	31.8	34.29	10.4652	-32.4159	-34.9541
2013-08-11 02:49:15	31.87	34.38	10.4721	-32.4873	-35.0459
2013-08-11 02:59:15	31.96	34.46	10.4791	-32.579	-35.1274	2013-08-11 02:59:15
2013-08-11 03:09:15	32.06	34.57	10.486	-32.6809	-35.2396
2013-08-11 03:19:15	32.17	34.66	10.493	-32.7931	-35.3313
2013-08-11 03:29:15	32.25	34.76	10.4999	-32.8746	-35.4332
2013-08-11 03:39:15	32.34	34.86	10.5068	-32.9664	-35.5352
2013-08-11 03:49:15	32.42	34.94	10.5138	-33.0479	-35.6167
2013-08-11 03:59:15	32.5	35.02	10.5207	-33.1295	-35.6983	2013-08-11 03:59:15
2013-08-11 04:09:15	32.6	35.13	10.5277	-33.2314	-35.8104
2013-08-11 04:19:15	32.71	35.22	10.5346	-33.3435	-35.9021
2013-08-11 04:29:15	32.81	35.33	10.5416	-33.4455	-36.0143
2013-08-11 04:39:15	32.89	35.41	10.5485	-33.527	-36.0958
2013-08-11 04:49:15	33	35.51	10.5555	-33.6391	-36.1978
2013-08-11 04:59:15	33.09	35.62	10.5624	-33.7309	-36.3099	2013-08-11 04:59:15
2013-08-11 05:09:15	33.18	35.69	10.5693	-33.8226	-36.3812
2013-08-11 05:19:15	33.29	35.8	10.5763	-33.9348	-36.4934
2013-08-11 05:29:15	33.18	35.7	10.5832	-33.8226	-36.3914
2013-08-11 05:39:15	33.4	35.91	10.5902	-34.0469	-36.6055
2013-08-11 05:49:15	33.51	36.02	10.5971	-34.159	-36.7176
2013-08-11 05:59:15	33.62	36.14	10.6041	-34.2712	-36.84	2013-08-11 05:59:15
2013-08-11 06:19:15	33.83	36.34	10.618	-34.4852	-37.0438
2013-08-11 06:29:15	33.92	36.44	10.6249	-34.577	-37.1458
2013-08-11 06:49:15	34.14	36.67	10.6388	-34.8012	-37.3802
2013-08-11 06:59:15	34.25	36.76	10.6457	-34.9134	-37.472
2013-08-11 07:09:15	34.37	36.88	10.6527	-35.0357	-37.5943
2013-08-11 07:19:15	34.45	36.97	10.6596	-35.1172	-37.686	2013-08-11 07:19:15
2013-08-11 07:29:15	34.57	37.1	10.6666	-35.2396	-37.8186
2013-08-11 07:39:15	34.68	37.19	10.6735	-35.3517	-37.9103
2013-08-11 07:49:15	34.79	37.3	10.6805	-35.4638	-38.0224
2013-08-11 07:59:15	34.89	37.41	10.6874	-35.5657	-38.1346
2013-08-11 08:09:15	35.01	37.52	10.6943	-35.6881	-38.2467
2013-08-11 08:19:15	35.12	37.65	10.7013	-35.8002	-38.3792	2013-08-11 08:19:15
2013-08-11 08:29:15	35.21	37.74	10.7082	-35.8919	-38.4709
2013-08-11 08:39:15	35.32	37.82	10.7152	-36.0041	-38.5525
2013-08-11 08:49:15	35.44	37.97	10.7221	-36.1264	-38.7054
2013-08-11 08:59:15	35.54	38.08	10.7291	-36.2283	-38.8175
2013-08-11 09:09:15	35.67	38.18	10.736	-36.3609	-38.9195
2013-08-11 09:19:15	35.78	38.32	10.743	-36.473	-39.0622	2013-08-11 09:19:15
2013-08-11 09:29:15	35.9	38.42	10.7499	-36.5953	-39.1641
2013-08-11 09:39:15	36.01	38.55	10.7568	-36.7074	-39.2966
2013-08-11 09:49:15	36.11	38.62	10.7638	-36.8094	-39.368
2013-08-11 09:59:15	36.24	38.77	10.7707	-36.9419	-39.5209
2013-08-11 10:09:15	36.36	38.88	10.7777	-37.0642	-39.633
2013-08-11 10:19:15	36.46	39	10.7846	-37.1662	-39.7554	2013-08-11 10:19:15
2013-08-11 10:29:15	36.59	39.03	10.7916	-37.2987	-39.7859
2013-08-11 10:39:15	36.7	39.22	10.7985	-37.4108	-39.9796
2013-08-11 10:49:15	36.81	39.33	10.8055	-37.5229	-40.0917
2013-08-11 10:59:15	36.91	39.43	10.8124	-37.6249	-40.1937
2013-08-11 11:09:15	37.03	39.57	10.8193	-37.7472	-40.3364
2013-08-11 11:19:15	37.15	39.69	10.8263	-37.8695	-40.4587	2013-08-11 11:19:15
2013-08-11 11:29:15	37.28	39.83	10.8332	-38.002	-40.6014
2013-08-11 11:39:15	37.4	39.97	10.8402	-38.1244	-40.7441
2013-08-11 11:49:15	37.56	40.07	10.8471	-38.2875	-40.8461
2013-08-11 11:59:15	37.66	40.18	10.8541	-38.3894	-40.9582
2013-08-11 12:09:15	37.77	40.35	10.861	-38.5015	-41.1315
2013-08-11 12:19:15	37.93	40.46	10.868	-38.6646	-41.2436	2013-08-11 12:19:15
2013-08-11 12:29:15	38.03	40.58	10.8749	-38.7666	-41.366
2013-08-11 12:39:15	38.17	40.75	10.8818	-38.9093	-41.5392
2013-08-11 12:49:15	38.32	40.86	10.8888	-39.0622	-41.6514
2013-08-11 12:59:15	38.44	40.99	10.8957	-39.1845	-41.7839
2013-08-11 13:09:15	38.61	41.16	10.9027	-39.3578	-41.9572
2013-08-11 13:19:15	38.72	41.27	10.9096	-39.4699	-42.0693	2013-08-11 13:19:15
2013-08-11 13:29:15	38.86	41.42	10.9166	-39.6126	-42.2222
2013-08-11 13:39:15	39.05	41.6	10.9235	-39.8063	-42.4057
2013-08-11 13:49:15	39.17	41.7	10.9305	-39.9286	-42.5076
2013-08-11 13:59:15	39.26	41.84	10.9374	-40.0204	-42.6504
2013-08-11 14:09:15	39.41	41.99	10.9443	-40.1733	-42.8033
2013-08-11 14:19:15	39.55	42.12	10.9513	-40.316	-42.9358	2013-08-11 14:19:15
2013-08-11 14:29:15	39.69	42.26	10.9582	-40.4587	-43.0785
2013-08-11 14:39:15	39.87	42.44	10.9652	-40.6422	-43.262
2013-08-11 14:49:15	40.01	42.53	10.9721	-40.7849	-43.3537
2013-08-11 14:59:15	40.15	42.71	10.9791	-40.9276	-43.5372
2013-08-11 15:09:15	40.27	42.83	10.986	-41.0499	-43.6595
2013-08-11 15:19:15	40.41	42.99	10.993	-41.1927	-43.8226	2013-08-11 15:19:15
2013-08-11 15:29:15	40.57	43.15	10.9999	-41.3558	-43.9857
2013-08-11 15:39:15	40.71	43.29	11.0068	-41.4985	-44.1284
2013-08-11 15:49:15	40.85	43.43	11.0138	-41.6412	-44.2712
2013-08-11 15:59:15	41.01	43.59	11.0207	-41.8043	-44.4343
2013-08-11 16:09:15	41.16	43.73	11.0277	-41.9572	-44.577
2013-08-11 16:19:15	41.31	43.9	11.0346	-42.1101	-44.7503	2013-08-11 16:19:15
2013-08-11 16:29:15	41.48	44.05	11.0416	-42.2834	-44.9032
2013-08-11 16:39:15	41.65	44.26	11.0485	-42.4567	-45.1172
2013-08-11 16:49:15	41.83	44.39	11.0555	-42.6402	-45.2497
2013-08-11 16:59:15	41.97	44.55	11.0624	-42.7829	-45.4128
2013-08-11 17:09:15	42.14	44.72	11.0693	-42.9562	-45.5861
2013-08-11 17:19:15	42.32	44.98	11.0763	-43.1397	-45.8512	2013-08-11 17:19:15
2013-08-11 17:29:15	42.51	45.05	11.0832	-43.3333	-45.9225
2013-08-11 17:39:15	42.65	45.24	11.0902	-43.476	-46.1162
2013-08-11 17:49:15	42.8	45.31	11.0971	-43.629	-46.1876
2013-08-11 17:59:15	43.01	45.62	11.1041	-43.843	-46.5036
2013-08-11 18:09:15	43.18	45.76	11.111	-44.0163	-46.6463
2013-08-11 18:19:15	43.35	45.95	11.118	-44.1896	-46.84	2013-08-11 18:19:15
2013-08-11 18:29:15	43.52	46.12	11.1249	-44.3629	-47.0133
2013-08-11 18:39:15	43.74	46.34	11.1318	-44.5872	-47.2375
2013-08-11 18:49:15	43.91	46.47	11.1388	-44.7604	-47.37
2013-08-11 18:59:15	44.06	46.65	11.1457	-44.9134	-47.5535
2013-08-11 19:09:15	44.25	46.89	11.1527	-45.107	-47.7982
2013-08-11 19:19:15	44.47	47.05	11.1596	-45.3313	-47.9613	2013-08-11 19:19:15
2013-08-11 19:29:15	44.62	47.23	11.1666	-45.4842	-48.1448
2013-08-11 19:39:15	44.85	47.45	11.1735	-45.7187	-48.369
2013-08-11 19:49:15	45	47.59	11.1805	-45.8716	-48.5117
2013-08-11 19:59:15	45.14	47.77	11.1874	-46.0143	-48.6952
2013-08-11 20:09:15	45.32	47.94	11.1943	-46.1978	-48.8685
2013-08-11 20:19:15	45.52	48.12	11.2013	-46.4016	-49.052	2013-08-11 20:19:15
2013-08-11 20:29:15	45.65	48.3	11.2082	-46.5341	-49.2355
2013-08-11 20:39:15	45.91	48.54	11.2152	-46.7992	-49.4801
2013-08-11 20:49:15	46.08	48.69	11.2221	-46.9725	-49.633
2013-08-11 20:59:15	46.26	48.88	11.2291	-47.156	-49.8267
2013-08-11 21:09:15	46.43	49.07	11.236	-47.3293	-50.0204
2013-08-11 21:19:15	46.63	49.28	11.243	-47.5331	-50.2345	2013-08-11 21:19:15
2013-08-11 21:29:15	46.86	49.51	11.2499	-47.7676	-50.4689
2013-08-11 21:39:15	47.05	49.71	11.2568	-47.9613	-50.6728
2013-08-11 21:49:15	47.25	49.9	11.2638	-48.1651	-50.8665
2013-08-11 21:59:15	47.48	50.1	11.2707	-48.3996	-51.0703
2013-08-11 22:09:15	47.67	50.32	11.2777	-48.5933	-51.2946
2013-08-11 22:19:15	47.88	50.54	11.2846	-48.8073	-51.5189	2013-08-11 22:19:15
2013-08-11 22:29:15	48.1	50.78	11.2916	-49.0316	-51.7635
2013-08-11 22:39:15	48.37	51	11.2985	-49.3068	-51.9878
2013-08-11 22:49:15	48.56	51.19	11.3055	-49.5005	-52.1814
2013-08-11 22:59:15	48.77	51.41	11.3124	-49.7146	-52.4057
2013-08-11 23:09:15	48.98	51.62	11.3193	-49.9286	-52.6198
2013-08-11 23:19:15	49.18	51.87	11.3263	-50.1325	-52.8746	2013-08-11 23:19:15
[truncated: 2,919 more rows]

## Sheet: Tensi
Zeit [d]	MP bot(2) [cm]	MP top(1) [cm]		air entry bot		AE time	AE [cm]	Type	Pos	Weight
0.00684625	-3.83282	-6.4526		2013-08-25 21:29:15	8800	25.2499	-8970.44	1	2	1
0.0485129	-4.04689	-6.6055
0.0901796	-4.28135	-6.83996		air entry top
0.131846	-4.24057	-6.80938		Time				Type	Pos	Weight
0.173513	-4.46483	-7.02345		2013-08-20 00:49:15	8800	19.3888	-8970.44	1	1	1
0.21518	-4.64832	-7.21713
0.256846	-4.80122	-7.37003
0.298513	-4.98471	-7.54332
0.34018	-5.07645	-7.64526
0.381846	-5.18858	-7.75739
0.423513	-5.30071	-7.86952
0.46518	-5.38226	-7.95107
0.506846	-5.46381	-8.02243
0.548513	-5.53517	-8.09378
0.59018	-5.62691	-8.19572
0.638791	-5.71865	-8.28746
0.680457	-5.75943	-8.30785
0.722124	-5.89195	-8.43017
0.763791	-5.99388	-8.5423
0.805457	-6.06524	-8.61366
0.854068	-6.1264	-8.68502
0.895735	-6.23853	-8.78695
0.944346	-6.27931	-8.82773
0.986013	-6.39144	-8.95005
1.02768	-6.43221	-8.99083
1.06935	-6.51376	-9.07238
1.11101	-6.53415	-9.09276
1.15268	-6.67686	-9.23547
1.19435	-6.65647	-9.20489
1.23601	-6.49337	-9.08257
1.27768	-6.68705	-9.22528
1.31935	-6.78899	-9.32722
1.36101	-6.89093	-9.42915
1.40962	-6.91131	-9.44954
1.45824	-7.02345	-9.55148
1.4999	-7.03364	-9.57187
1.54157	-7.11519	-9.65341
1.58324	-7.15596	-9.69419
1.6249	-7.20693	-9.74516
1.66657	-7.27829	-9.81651
1.70824	-7.30887	-9.84709
1.7499	-7.2579	-9.80632
1.79157	-7.38022	-9.90826
1.83324	-7.45158	-9.98981
1.8749	-7.51274	-10.051
1.91657	-7.59429	-10.1223
1.95824	-7.68603	-10.2141
1.9999	-7.79817	-10.3262
2.04157	-7.88991	-10.4179
2.08324	-7.96126	-10.4893
2.1249	-8.09378	-10.6218
2.16657	-8.20591	-10.7238
2.20824	-8.25688	-10.7645
2.25685	-8.41998	-10.9378
2.30546	-8.53211	-11.0499
2.34712	-8.59327	-11.1111
2.38879	-8.67482	-11.1927
2.43046	-8.68502	-11.2029
2.47212	-8.74618	-11.2742
2.51379	-8.79715	-11.315
2.55546	-8.85831	-11.3761
2.59712	-8.90928	-11.4373
2.63879	-8.98063	-11.4985
2.68046	-9.06218	-11.58
2.72212	-9.16412	-11.682
2.76379	-9.22528	-11.7431
2.80546	-9.26606	-11.7941
2.84712	-9.3476	-11.8552
2.88879	-9.40877	-11.9368
2.93046	-9.49032	-12.0183
2.97212	-9.53109	-12.0387
3.01379	-9.58206	-12.0999
3.05546	-9.70438	-12.2222
3.09712	-9.78593	-12.314
3.13879	-9.85729	-12.3751
3.1874	-9.91845	-12.4363
3.22907	-9.97961	-12.5076
3.27074	-9.86748	-12.3547
3.3124	-10	-12.4975
3.35407	-10.0612	-12.5586
3.39574	-10.0306	-12.528
3.4374	-10.1019	-12.6096
3.47907	-10.1631	-12.6606
3.52768	-10.2446	-12.7523
3.56935	-10.3058	-12.8033
3.61101	-10.3568	-12.8542
3.65268	-10.4179	-12.9256
3.69435	-10.4791	-12.9867
3.73601	-10.5403	-13.0377
3.77768	-10.6014	-13.0989
3.81935	-10.6422	-13.1498
3.86101	-10.7238	-13.2416
3.90268	-10.7849	-13.3028
3.95129	-10.8665	-13.3843
3.9999	-10.9582	-13.476
4.04157	-11.0398	-13.5576
4.08324	-11.1315	-13.6391
4.1249	-11.2232	-13.7309
4.16657	-11.315	-13.8226
4.20824	-11.3252	-13.8328
4.25685	-11.4475	-13.9653
4.29851	-11.5291	-14.0367
4.34018	-11.6004	-14.1081
4.38185	-11.6616	-14.1692
4.42351	-11.6718	-14.1896
4.46518	-11.7533	-14.2508
4.50685	-11.8145	-14.3221
4.55546	-11.8756	-14.3833
4.60407	-11.9572	-14.4648
4.65268	-12.0489	-14.5566
4.69435	-12.1305	-14.6381
4.73601	-12.1814	-14.6993
4.77768	-12.2732	-14.8012
4.81935	-12.3751	-14.893
4.86101	-12.4669	-14.9949
4.90268	-12.5382	-15.0561
4.94435	-12.6198	-15.1274
4.98601	-12.7217	-15.2294
5.02768	-12.8338	-15.3415
5.06935	-12.9562	-15.4536
5.11101	-13.0683	-15.5657
5.15268	-13.1702	-15.6677
5.19435	-13.2824	-15.79
5.23601	-13.2722	-15.7594
5.27768	-13.3639	-15.8614
5.31935	-13.4353	-15.9429
5.36101	-13.5168	-16.0245
5.40268	-13.5882	-16.0856
5.44435	-13.6595	-16.157
5.48601	-13.7207	-16.2385
5.52768	-13.7717	-16.2793
5.56935	-13.843	-16.3405
5.61101	-13.9042	-16.4118
5.65268	-13.9551	-16.4526
5.70129	-14.0367	-16.5443
5.74296	-14.1081	-16.6157
5.79157	-14.1692	-16.6769
5.83324	-14.2406	-16.738
5.8749	-14.3221	-16.8298
5.91657	-14.3221	-16.8196
5.95824	-14.4444	-16.9521
5.9999	-14.577	-17.0744
6.04157	-14.6891	-17.1865
6.08324	-14.842	-17.3191
6.1249	-14.9337	-17.4312
6.16657	-15.0968	-17.5943
6.20824	-15.1988	-17.6962
6.2499	-15.3007	-17.8084
6.29157	-15.3721	-17.8695
6.33324	-15.4434	-17.9511
6.3749	-15.4944	-18.002
6.41657	-15.5657	-18.0836
6.45824	-15.5759	-18.0938
6.4999	-15.6575	-18.1651
6.54157	-15.7288	-18.2365
6.58324	-15.79	-18.2977
6.6249	-15.8614	-18.3588
6.66657	-15.9327	-18.4302
6.70824	-16.0347	-18.5423
6.7499	-16.1162	-18.6239
6.79157	-16.1978	-18.6952
6.83324	-16.2691	-18.7768
6.8749	-16.3405	-18.8481
6.91657	-16.371	-18.8889
6.95824	-16.4628	-18.9704
6.9999	-16.5443	-19.052
7.04157	-16.6157	-19.1233
7.08324	-16.6972	-19.1947
7.1249	-16.7788	-19.2762
7.16657	-16.4118	-19.0112
7.20824	-16.9011	-19.4088
7.2499	-16.9725	-19.4801
7.29157	-17.0642	-19.5617
7.33324	-17.1152	-19.6228
7.3749	-17.1662	-19.6534
7.42351	-17.2375	-19.7554
7.46518	-17.2987	-19.8063
7.50685	-17.3802	-19.8879
7.54851	-17.4414	-19.9592
7.59018	-17.5025	-20.0306
7.63185	-17.5841	-20.0917
7.67351	-17.6555	-20.1631
7.71518	-17.7778	-20.2752
7.75685	-17.8593	-20.3568
7.79851	-17.9511	-20.4485
7.84018	-18.0122	-20.5199
7.88185	-18.1244	-20.6218
7.92351	-18.2059	-20.7034
7.96518	-18.3078	-20.8155
8.00685	-18.3996	-20.9072
8.04851	-18.5015	-20.999
8.09018	-18.6035	-21.1111
8.13185	-18.7054	-21.213
8.17351	-18.8073	-21.315
8.21518	-18.8991	-21.3965
8.25685	-18.9704	-21.4781
8.29851	-19.0928	-21.6004
8.34018	-19.2151	-21.7023
8.38185	-19.3068	-21.8247
8.42351	-19.4393	-21.947
8.46518	-19.5515	-22.0591
8.50685	-19.6738	-22.1916
8.54851	-19.8063	-22.3242
8.59018	-19.9592	-22.4669
8.63185	-20.0917	-22.5994
8.67351	-20.2243	-22.7319
8.71518	-20.3466	-22.8542
8.75685	-20.5301	-23.0377
8.79851	-20.6728	-23.16
8.84712	-20.8563	-23.3537
8.88879	-21.0296	-23.5372
8.93046	-21.1315	-23.6493
8.97212	-21.3354	-23.8532
9.01379	-21.5494	-24.0571
9.05546	-21.7737	-24.2813
9.09712	-22.0082	-24.5158
9.13879	-22.263	-24.7808
9.18046	-22.5076	-25.0051
9.22212	-22.7319	-25.2396
9.26379	-22.946	-25.4434
9.30546	-23.1397	-25.6575
9.34712	-23.3537	-25.8614
9.38879	-23.5678	-26.0754
9.43046	-23.8124	-26.3303
9.47212	-24.0571	-26.5647
9.51379	-24.2915	-26.8094
9.55546	-24.5566	-27.0744
9.59712	-24.8114	-27.3191
9.63879	-25.0663	-27.5841
9.68046	-25.3517	-27.8695
9.72212	-25.6473	-28.1549
9.76379	-25.8919	-28.3996
9.80546	-26.208	-28.7258
9.84712	-26.524	-29.0418
9.88879	-26.8094	-29.3374
9.93046	-27.1152	-29.6228
9.97212	-27.4414	-29.9694
10.0138	-27.7982	-30.3058
10.0555	-28.1957	-30.7136
10.1041	-28.6035	-31.1213
10.1457	-29.0112	-31.5392
10.1874	-29.3986	-31.9368
10.2291	-29.8267	-32.3547
10.2707	-30.2243	-32.7727
10.3124	-30.6728	-33.211
10.3541	-31.0805	-33.6391
10.3957	-31.5596	-34.0979
10.4374	-32.0489	-34.5973
10.4791	-32.579	-35.1274
10.5207	-33.1295	-35.6983
10.5624	-33.7309	-36.3099
10.6041	-34.2712	-36.84
10.6596	-35.1172	-37.686
10.7013	-35.8002	-38.3792
10.743	-36.473	-39.0622
10.7846	-37.1662	-39.7554
10.8263	-37.8695	-40.4587
10.868	-38.6646	-41.2436
10.9096	-39.4699	-42.0693
10.9513	-40.316	-42.9358
10.993	-41.1927	-43.8226
11.0346	-42.1101	-44.7503
11.0763	-43.1397	-45.8512
11.118	-44.1896	-46.84
11.1596	-45.3313	-47.9613
11.2013	-46.4016	-49.052
11.243	-47.5331	-50.2345
11.2846	-48.8073	-51.5189
11.3263	-50.1325	-52.8746
11.368	-51.4985	-54.21
11.4166	-53.1804	-55.9225
11.4582	-54.6381	-57.37
11.5068	-56.5138	-59.2762
11.5485	-58.1448	-60.9378
11.5902	-59.8369	-62.6096
11.6318	-61.6106	-64.3935
11.6735	-63.4353	-66.2589
11.7152	-65.0051	-67.9103
11.7568	-67.1662	-70.0102
11.7985	-69.1335	-71.9572
11.8402	-71.213	-74.0469
11.8818	-73.3639	-76.2997
11.9235	-75.5046	-78.4404
11.9652	-77.6656	-80.5403
12.0068	-79.8165	-82.7217
12.0485	-81.8247	-84.842
12.0902	-83.8634	-86.8909
12.1318	-85.8818	-88.9602
12.1735	-87.8593	-90.9378
12.2152	-89.7655	-92.8848
12.2568	-91.7125	-94.8216
12.2985	-93.7411	-96.9521
12.3402	-95.7187	-98.9602
12.3818	-97.7472	-101.04
12.4235	-99.7859	-103.15
12.4652	-101.876	-105.27
12.5068	-103.935	-107.492
12.5485	-106.065	-109.113
12.5902	-108.267	-111.896
12.6318	-110.51	-114.23
12.6735	-112.834	-116.646
12.7221	-115.607	-119.572
12.7638	-118.022	-122.13
12.8055	-120.469	-124.628
12.8471	-122.946	-127.156
12.8888	-125.566	-129.918
12.9305	-128.033	-132.436
12.9721	-130.489	-135.076
13.0138	-132.885	-137.574
13.0555	-135.107	-140.051
13.1041	-137.788	-142.793
13.1457	-139.817	-144.822
13.1874	-141.346	-146.626
13.2291	-143.282	-148.573
13.2707	-144.893	-150.306
13.3124	-146.412	-151.927
13.3541	-147.859	-153.394
13.3957	-149.164	-154.822
13.4374	-150.52	-156.259
13.4791	-151.641	-157.492
13.5207	-152.712	-158.614
13.5624	-153.7	-159.704
13.6041	-154.618	-160.724
13.6457	-155.494	-161.672
13.6874	-156.116	-162.314
13.7291	-156.85	-163.119
13.7707	-157.503	-163.823
13.8124	-158.124	-164.526
13.8541	-158.705	-165.199
13.8957	-159.266	-165.78
13.9374	-159.745	-166.391
13.9791	-160.306	-167.105
14.0207	-160.887	-167.737
14.0624	-161.356	-168.216
14.1041	-161.233	-168.308
14.1457	-162.304	-169.399
14.1874	-162.793	-169.888
14.2291	-163.231	-170.438
14.2707	-163.7	-170.826
14.3124	-164.169	-171.325
14.3541	-164.618	-171.743
14.3957	-165.066	-172.212
14.4374	-165.525	-172.701
14.4791	-165.973	-173.252
14.5207	-166.555	-173.884
14.5624	-166.952	-174.312
14.6041	-167.37	-174.771
14.6457	-167.768	-175.189
14.6943	-168.196	-175.607
14.736	-168.512	-175.81
14.7777	-168.532	-175.719
14.8193	-168.787	-176.055
14.861	-168.838	-176.228
14.9027	-169.174	-176.656
14.9443	-169.49	-177.023
14.986	-169.806	-177.278
15.0346	-170.153	-177.941
15.0763	-170.428	-178.104
15.118	-170.754	-178.552
15.1596	-170.897	-178.736
15.2013	-171.213	-179.399
15.243	-171.509	-179.806
15.2846	-171.713	-180.153
15.3263	-171.916	-180.612
15.368	-172.13	-181.101
15.4096	-172.385	-181.57
15.4513	-172.62	-182.11
15.493	-172.864	-182.722
15.5346	-173.109	-183.313
15.5763	-173.333	-183.914
15.618	-173.772	-184.903
15.6596	-174.016	-185.698
15.7013	-174.2	-186.279
15.743	-174.19	-186.983
15.7916	-174.526	-188.155
15.8332	-174.873	-189.195
15.8749	-175.148	-190.296
15.9166	-175.352	-191.427
15.9582	-175.596	-192.661
16.0068	-176.055	-194.251
16.0485	-176.249	-195.698
16.0902	-176.524	-197.554
16.1318	-176.799	-199.582
16.1735	-176.891	-201.59
16.2152	-177.207	-204.179
16.2568	-177.462	-206.809
16.2985	-177.737	-209.592
16.3402	-177.9	-213.496
16.3818	-178.124	-216.738
16.4235	-178.318	-221.274
16.4652	-178.532	-225.923
16.5068	-178.695	-231.131
16.5485	-178.97	-237.788
16.5902	-179.174	-244.903
16.6318	-179.368	-254.139
16.6735	-179.582	-265.484
16.7152	-179.867	-279.276
16.7568	-180.122	-295.8
16.7985	-180.387	-312.304
16.8402	-180.652	-334.679
16.8818	-180.907	-360.754
16.9235	-181.142	-395.719
16.9652	-181.407
17.0068	-181.468
17.0485	-181.753
17.0902	-180.102
17.1318	-182.314
17.1735	-182.579
17.2152	-182.864
17.2568	-183.099
17.2985	-183.293
17.3402	-183.527
17.3818	-183.731
17.4235	-183.945
17.4652	-184.149
17.5138	-184.434
17.5555	-184.679
17.5971	-184.852
17.6388	-185.138
17.6805	-185.352
17.7221	-185.566
17.7638	-185.8
17.8055	-186.106
17.8471	-186.381
17.8888	-186.646
17.9305	-186.922
17.9721	-187.36
18.0138	-187.584
18.0555	-187.839
18.1041	-188.104
18.1457	-188.298
18.1874	-188.104
18.2291	-188.563
18.2707	-188.797
18.3124	-188.981
18.3541	-189.215
18.3957	-189.47
18.4374	-189.674
18.4791	-189.878
18.5207	-190.112
18.5624	-190.469
18.6041	-190.693
18.6457	-190.907
18.6874	-191.182
18.736	-191.468
18.7777	-191.794
18.8193	-192.018
18.861	-192.446
18.9027	-192.783
18.9443	-192.997
18.986	-193.252
19.0277	-193.568
19.0693	-194.088
19.118	-194.485
19.1596	-194.801
19.2013	-194.995
19.243	-195.352
19.2846	-195.28
19.3263	-195.657
19.368	-196.035
19.4096	-196.412
19.4513	-196.789
19.493	-197.187
19.5346	-197.554
19.5763	-197.91
19.618	-198.277
19.6596	-198.705
19.7013	-199.032
19.743	-199.327
19.7846	-199.623
19.8263	-200.031
19.868	-200.469
19.9096	-200.754
19.9513	-200.856
19.993	-201.427
20.0346	-201.978
20.0763	-202.365
20.118	-202.936
20.1596	-203.282
20.2013	-203.751
20.243	-204.363
20.2846	-204.944
20.3263	-205.576
20.368	-206.157
20.4096	-206.789
20.4513	-207.533
20.493	-208.226
20.5346	-209.001
20.5763	-209.419
20.618	-210.367
20.6596	-211.203
20.7013	-211.702
20.743	-212.477
20.7846	-213.211
20.8263	-214.098
20.868	-215.474
20.9096	-216.656
20.9513	-217.655
20.993	-218.593
21.0346	-219.378
21.0763	-220.336
21.118	-221.56
21.1596	-223.028
21.2013	-224.608
21.243	-226.106
21.2846	-227.625
21.3263	-229.235
21.368	-230.846
21.4096	-232.64
21.4513	-234.516
21.493	-236.177
21.5346	-238.338
21.5763	-239.959
21.618	-242.324
21.6596	-244.852
21.7013	-247.105
21.743	-249.653
21.7846	-252.538
21.8263	-255.301
21.868	-258.338
21.9096	-261.407
21.9513	-263.955
21.993	-267.411
22.0346	-271.764
22.0763	-276.871
22.118	-282.416
22.1596	-289.419
22.2013	-293.089
22.243	-293.925
22.2846	-300.724
22.3263	-306.524
22.368	-313.435
22.4096	-319.276
22.4513	-327.523
22.493	-335.372
22.5346	-346.361
22.5763	-357.278
22.618	-368.44
22.6596	-383.201
22.7013	-400.581
22.743	-416.442
22.7846	-436.85
22.8263	-455.26
22.868	-475.77
22.9096	-493.129
22.9513	-521.081
22.993	-558.145
23.0346	-600.683
23.0763	-654.414
23.118	-701.437
23.1596	-780.714
23.2013	-891.855
23.243	-985.505
23.2707	-1060.44

## Sheet: HYDRUS
Data für die Zielfunktion: 2 x Tensionen, 1 x Endwassergehalt						Verdunstungsrate
Time	Obs	Type	Pos	Weight		Zeitintervall		Evarate [cm/d]			Type	1-Tension	2-Wassergehalt
0.00684625	-3.83282	1	2	1		0.668449	0	0.229456			Pos	1-top	2-bot	(von oben nach unten)
0.0485129	-4.04689	1	2	1		1.19739	0	0.265614			66	Time-Variable boundary conditions+
0.0901796	-4.28135	1	2	1		1.71143	0	0.220348			25.279	Final Time	Time Information
0.131846	-4.24057	1	2	1		1.88242	0	0.217569			1024	Number of Data Points in Objective Function
0.173513	-4.46483	1	2	1		2.17968	0	0.320214		Interpolated Values	-5.19535	BC-top	[hPa]
0.21518	-4.64832	1	2	1		2.65033	0	0.25435			-3.94535	MP_top_ini	[hPa]	1
0.256846	-4.80122	1	2	1		2.98596	0	0.23159			-0.940528	MP_bot_ini	[hPa]	2
0.298513	-4.98471	1	2	1		3.23443	0	0.241731			0.309472	BC-bot	[hPa]
0.34018	-5.07645	1	2	1		3.78025	0	0.183531
0.381846	-5.18858	1	2	1		4.19923	0	0.215285
0.423513	-5.30071	1	2	1		4.71564	0	0.198008
0.46518	-5.38226	1	2	1		4.91561	0	0.220336		Real Values	-6.78517	BC-top	[cm]
0.506846	-5.46381	1	2	1		5.21949	0	0.270149			-5.53517	MP_top_ini	[cm]
0.548513	-5.53517	1	2	1		5.65994	0	0.198182			-3.00714	MP_bot_ini	[cm]
0.59018	-5.62691	1	2	1		5.88886	0	0.187925			-1.75714	BC-bot	[cm]
0.638791	-5.71865	1	2	1		6.11694	0	0.266984
0.680457	-5.75943	1	2	1		6.69574	0	0.20144
0.722124	-5.89195	1	2	1		6.90428	0	0.181388
0.763791	-5.99388	1	2	1		7.16514	0	0.175275
0.805457	-6.06524	1	2	1		7.70658	0	0.158914
0.854068	-6.1264	1	2	1		8.18172	0	0.174525
0.895735	-6.23853	1	2	1		8.74894	0	0.202255
0.944346	-6.27931	1	2	1		8.90887	0	0.223519
0.986013	-6.39144	1	2	1		9.12636	0	0.265649
1.02768	-6.43221	1	2	1		9.74589	0	0.250927
1.06935	-6.51376	1	2	1		10.0914	0	0.245406
1.11101	-6.53415	1	2	1		10.5782	0	0.250171
1.15268	-6.67686	1	2	1		11.2049	0	0.255383
1.19435	-6.65647	1	2	1		11.7132	0	0.24407
1.23601	-6.49337	1	2	1		11.8878	0	0.217907
1.27768	-6.68705	1	2	1		12.1036	0	0.212848
1.31935	-6.78899	1	2	1		12.6928	0	0.219397
1.36101	-6.89093	1	2	1		12.8928	0	0.220256
1.40962	-6.91131	1	2	1		13.1856	0	0.22292
1.45824	-7.02345	1	2	1		13.6839	0	0.199765
1.4999	-7.03364	1	2	1		13.8762	0	0.175102
1.54157	-7.11519	1	2	1		14.1041	0	0.174135
1.58324	-7.15596	1	2	1		14.1193	0	0.16451
1.6249	-7.20693	1	2	1		14.8217	0	0.149713
1.66657	-7.27829	1	2	1		15.0436	0	0.128345
1.70824	-7.30887	1	2	1		15.158	0	0.125328
1.7499	-7.2579	1	2	1		15.7286	0	0.10891
1.79157	-7.38022	1	2	1		15.883	0	0.100935
1.83324	-7.45158	1	2	1		16.1626	0	0.104798
1.8749	-7.51274	1	2	1		16.7463	0	0.0950729
1.91657	-7.59429	1	2	1		16.9864	0	0.0822478
1.95824	-7.68603	1	2	1		17.1632	0	0.0834444
1.9999	-7.79817	1	2	1		17.7405	0	0.0737976
2.04157	-7.88991	1	2	1		18.1831	0	0.0694913
2.08324	-7.96126	1	2	1		18.6978	0	0.0662291
2.1249	-8.09378	1	2	1		18.9953	0	0.0600791
2.16657	-8.20591	1	2	1		19.2783	0	0.0624151
2.20824	-8.25688	1	2	1		19.6743	0	0.0645601
2.25685	-8.41998	1	2	1		20.1485	0	0.0653037
2.30546	-8.53211	1	2	1		20.686	0	0.0665006
2.34712	-8.59327	1	2	1		21.2115	0	0.060117
2.38879	-8.67482	1	2	1		21.7115	0	0.0519602
2.43046	-8.68502	1	2	1		21.9618	0	0.0539761
2.47212	-8.74618	1	2	1		22.0867	0	0.0499136
2.51379	-8.79715	1	2	1		22.7248	0	0.0475541
2.55546	-8.85831	1	2	1		22.8968	0	0.0447046
2.59712	-8.90928	1	2	1		23.1053	0	0.0448392
2.63879	-8.98063	1	2	1		23.8108	0	0.041834
2.68046	-9.06218	1	2	1		24.1448	0	0.0435632
2.72212	-9.16412	1	2	1		24.8187	0	0.0373125
2.76379	-9.22528	1	2	1		25.279	0	0.0348427
2.80546	-9.26606	1	2	1
2.84712	-9.3476	1	2	1
2.88879	-9.40877	1	2	1
2.93046	-9.49032	1	2	1
2.97212	-9.53109	1	2	1
3.01379	-9.58206	1	2	1
3.05546	-9.70438	1	2	1
3.09712	-9.78593	1	2	1
3.13879	-9.85729	1	2	1
3.1874	-9.91845	1	2	1
3.22907	-9.97961	1	2	1
3.27074	-9.86748	1	2	1
3.3124	-10	1	2	1
3.35407	-10.0612	1	2	1
3.39574	-10.0306	1	2	1
3.4374	-10.1019	1	2	1
3.47907	-10.1631	1	2	1
3.52768	-10.2446	1	2	1
3.56935	-10.3058	1	2	1
3.61101	-10.3568	1	2	1
3.65268	-10.4179	1	2	1
3.69435	-10.4791	1	2	1
3.73601	-10.5403	1	2	1
3.77768	-10.6014	1	2	1
3.81935	-10.6422	1	2	1
3.86101	-10.7238	1	2	1
3.90268	-10.7849	1	2	1
3.95129	-10.8665	1	2	1
3.9999	-10.9582	1	2	1
4.04157	-11.0398	1	2	1
4.08324	-11.1315	1	2	1
4.1249	-11.2232	1	2	1
4.16657	-11.315	1	2	1
4.20824	-11.3252	1	2	1
4.25685	-11.4475	1	2	1
4.29851	-11.5291	1	2	1
4.34018	-11.6004	1	2	1
4.38185	-11.6616	1	2	1
4.42351	-11.6718	1	2	1
4.46518	-11.7533	1	2	1
4.50685	-11.8145	1	2	1
4.55546	-11.8756	1	2	1
4.60407	-11.9572	1	2	1
4.65268	-12.0489	1	2	1
4.69435	-12.1305	1	2	1
4.73601	-12.1814	1	2	1
4.77768	-12.2732	1	2	1
4.81935	-12.3751	1	2	1
4.86101	-12.4669	1	2	1
4.90268	-12.5382	1	2	1
4.94435	-12.6198	1	2	1
4.98601	-12.7217	1	2	1
5.02768	-12.8338	1	2	1
5.06935	-12.9562	1	2	1
5.11101	-13.0683	1	2	1
5.15268	-13.1702	1	2	1
5.19435	-13.2824	1	2	1
5.23601	-13.2722	1	2	1
5.27768	-13.3639	1	2	1
5.31935	-13.4353	1	2	1
5.36101	-13.5168	1	2	1
5.40268	-13.5882	1	2	1
5.44435	-13.6595	1	2	1
5.48601	-13.7207	1	2	1
5.52768	-13.7717	1	2	1
5.56935	-13.843	1	2	1
5.61101	-13.9042	1	2	1
5.65268	-13.9551	1	2	1
5.70129	-14.0367	1	2	1
5.74296	-14.1081	1	2	1
5.79157	-14.1692	1	2	1
5.83324	-14.2406	1	2	1
5.8749	-14.3221	1	2	1
5.91657	-14.3221	1	2	1
5.95824	-14.4444	1	2	1
5.9999	-14.577	1	2	1
6.04157	-14.6891	1	2	1
6.08324	-14.842	1	2	1
6.1249	-14.9337	1	2	1
6.16657	-15.0968	1	2	1
6.20824	-15.1988	1	2	1
6.2499	-15.3007	1	2	1
6.29157	-15.3721	1	2	1
6.33324	-15.4434	1	2	1
6.3749	-15.4944	1	2	1
6.41657	-15.5657	1	2	1
6.45824	-15.5759	1	2	1
6.4999	-15.6575	1	2	1
6.54157	-15.7288	1	2	1
6.58324	-15.79	1	2	1
6.6249	-15.8614	1	2	1
6.66657	-15.9327	1	2	1
6.70824	-16.0347	1	2	1
6.7499	-16.1162	1	2	1
6.79157	-16.1978	1	2	1
6.83324	-16.2691	1	2	1
6.8749	-16.3405	1	2	1
6.91657	-16.371	1	2	1
6.95824	-16.4628	1	2	1
6.9999	-16.5443	1	2	1
7.04157	-16.6157	1	2	1
7.08324	-16.6972	1	2	1
7.1249	-16.7788	1	2	1
7.16657	-16.4118	1	2	1
7.20824	-16.9011	1	2	1
7.2499	-16.9725	1	2	1
7.29157	-17.0642	1	2	1
7.33324	-17.1152	1	2	1
7.3749	-17.1662	1	2	1
7.42351	-17.2375	1	2	1
7.46518	-17.2987	1	2	1
7.50685	-17.3802	1	2	1
7.54851	-17.4414	1	2	1
7.59018	-17.5025	1	2	1
7.63185	-17.5841	1	2	1
7.67351	-17.6555	1	2	1
7.71518	-17.7778	1	2	1
7.75685	-17.8593	1	2	1
7.79851	-17.9511	1	2	1
7.84018	-18.0122	1	2	1
7.88185	-18.1244	1	2	1
7.92351	-18.2059	1	2	1
7.96518	-18.3078	1	2	1
8.00685	-18.3996	1	2	1
8.04851	-18.5015	1	2	1
8.09018	-18.6035	1	2	1
8.13185	-18.7054	1	2	1
8.17351	-18.8073	1	2	1
8.21518	-18.8991	1	2	1
8.25685	-18.9704	1	2	1
8.29851	-19.0928	1	2	1
8.34018	-19.2151	1	2	1
8.38185	-19.3068	1	2	1
8.42351	-19.4393	1	2	1
8.46518	-19.5515	1	2	1
8.50685	-19.6738	1	2	1
8.54851	-19.8063	1	2	1
8.59018	-19.9592	1	2	1
8.63185	-20.0917	1	2	1
8.67351	-20.2243	1	2	1
8.71518	-20.3466	1	2	1
8.75685	-20.5301	1	2	1
8.79851	-20.6728	1	2	1
8.84712	-20.8563	1	2	1
8.88879	-21.0296	1	2	1
8.93046	-21.1315	1	2	1
8.97212	-21.3354	1	2	1
9.01379	-21.5494	1	2	1
9.05546	-21.7737	1	2	1
9.09712	-22.0082	1	2	1
9.13879	-22.263	1	2	1
9.18046	-22.5076	1	2	1
9.22212	-22.7319	1	2	1
9.26379	-22.946	1	2	1
9.30546	-23.1397	1	2	1
9.34712	-23.3537	1	2	1
9.38879	-23.5678	1	2	1
9.43046	-23.8124	1	2	1
9.47212	-24.0571	1	2	1
9.51379	-24.2915	1	2	1
9.55546	-24.5566	1	2	1
9.59712	-24.8114	1	2	1
9.63879	-25.0663	1	2	1
9.68046	-25.3517	1	2	1
9.72212	-25.6473	1	2	1
9.76379	-25.8919	1	2	1
9.80546	-26.208	1	2	1
9.84712	-26.524	1	2	1
9.88879	-26.8094	1	2	1
9.93046	-27.1152	1	2	1
9.97212	-27.4414	1	2	1
10.0138	-27.7982	1	2	1
10.0555	-28.1957	1	2	1
10.1041	-28.6035	1	2	1
10.1457	-29.0112	1	2	1
10.1874	-29.3986	1	2	1
10.2291	-29.8267	1	2	1
10.2707	-30.2243	1	2	1
10.3124	-30.6728	1	2	1
10.3541	-31.0805	1	2	1
10.3957	-31.5596	1	2	1
10.4374	-32.0489	1	2	1
10.4791	-32.579	1	2	1
10.5207	-33.1295	1	2	1
10.5624	-33.7309	1	2	1
10.6041	-34.2712	1	2	1
10.6596	-35.1172	1	2	1
10.7013	-35.8002	1	2	1
10.743	-36.473	1	2	1
10.7846	-37.1662	1	2	1
10.8263	-37.8695	1	2	1
10.868	-38.6646	1	2	1
10.9096	-39.4699	1	2	1
10.9513	-40.316	1	2	1
10.993	-41.1927	1	2	1
11.0346	-42.1101	1	2	1
11.0763	-43.1397	1	2	1
11.118	-44.1896	1	2	1
11.1596	-45.3313	1	2	1
11.2013	-46.4016	1	2	1
11.243	-47.5331	1	2	1
11.2846	-48.8073	1	2	1
11.3263	-50.1325	1	2	1
11.368	-51.4985	1	2	1
11.4166	-53.1804	1	2	1
11.4582	-54.6381	1	2	1
11.5068	-56.5138	1	2	1
11.5485	-58.1448	1	2	1
11.5902	-59.8369	1	2	1
11.6318	-61.6106	1	2	1
11.6735	-63.4353	1	2	1
11.7152	-65.0051	1	2	1
11.7568	-67.1662	1	2	1
11.7985	-69.1335	1	2	1
11.8402	-71.213	1	2	1
11.8818	-73.3639	1	2	1
11.9235	-75.5046	1	2	1
11.9652	-77.6656	1	2	1
12.0068	-79.8165	1	2	1
12.0485	-81.8247	1	2	1
12.0902	-83.8634	1	2	1
12.1318	-85.8818	1	2	1
12.1735	-87.8593	1	2	1
12.2152	-89.7655	1	2	1
12.2568	-91.7125	1	2	1
12.2985	-93.7411	1	2	1
12.3402	-95.7187	1	2	1
12.3818	-97.7472	1	2	1
12.4235	-99.7859	1	2	1
12.4652	-101.876	1	2	1
12.5068	-103.935	1	2	1
12.5485	-106.065	1	2	1
12.5902	-108.267	1	2	1
12.6318	-110.51	1	2	1
12.6735	-112.834	1	2	1
12.7221	-115.607	1	2	1
12.7638	-118.022	1	2	1
12.8055	-120.469	1	2	1
12.8471	-122.946	1	2	1
12.8888	-125.566	1	2	1
12.9305	-128.033	1	2	1
12.9721	-130.489	1	2	1
13.0138	-132.885	1	2	1
13.0555	-135.107	1	2	1
13.1041	-137.788	1	2	1
13.1457	-139.817	1	2	1
13.1874	-141.346	1	2	1
13.2291	-143.282	1	2	1
13.2707	-144.893	1	2	1
13.3124	-146.412	1	2	1
13.3541	-147.859	1	2	1
13.3957	-149.164	1	2	1
13.4374	-150.52	1	2	1
13.4791	-151.641	1	2	1
13.5207	-152.712	1	2	1
13.5624	-153.7	1	2	1
13.6041	-154.618	1	2	1
13.6457	-155.494	1	2	1
13.6874	-156.116	1	2	1
13.7291	-156.85	1	2	1
13.7707	-157.503	1	2	1
13.8124	-158.124	1	2	1
13.8541	-158.705	1	2	1
13.8957	-159.266	1	2	1
13.9374	-159.745	1	2	1
13.9791	-160.306	1	2	1
14.0207	-160.887	1	2	1
14.0624	-161.356	1	2	1
14.1041	-161.233	1	2	1
14.1457	-162.304	1	2	1
14.1874	-162.793	1	2	1
14.2291	-163.231	1	2	1
14.2707	-163.7	1	2	1
14.3124	-164.169	1	2	1
14.3541	-164.618	1	2	1
14.3957	-165.066	1	2	1
14.4374	-165.525	1	2	1
14.4791	-165.973	1	2	1
14.5207	-166.555	1	2	1
14.5624	-166.952	1	2	1
14.6041	-167.37	1	2	1
14.6457	-167.768	1	2	1
14.6943	-168.196	1	2	1
14.736	-168.512	1	2	1
14.7777	-168.532	1	2	1
14.8193	-168.787	1	2	1
14.861	-168.838	1	2	1
14.9027	-169.174	1	2	1
14.9443	-169.49	1	2	1
14.986	-169.806	1	2	1
15.0346	-170.153	1	2	1
15.0763	-170.428	1	2	1
15.118	-170.754	1	2	1
15.1596	-170.897	1	2	1
15.2013	-171.213	1	2	1
15.243	-171.509	1	2	1
15.2846	-171.713	1	2	1
15.3263	-171.916	1	2	1
15.368	-172.13	1	2	1
15.4096	-172.385	1	2	1
15.4513	-172.62	1	2	1
15.493	-172.864	1	2	1
15.5346	-173.109	1	2	1
15.5763	-173.333	1	2	1
15.618	-173.772	1	2	1
15.6596	-174.016	1	2	1
15.7013	-174.2	1	2	1
15.743	-174.19	1	2	1
15.7916	-174.526	1	2	1
15.8332	-174.873	1	2	1
15.8749	-175.148	1	2	1
15.9166	-175.352	1	2	1
15.9582	-175.596	1	2	1
16.0068	-176.055	1	2	1
16.0485	-176.249	1	2	1
16.0902	-176.524	1	2	1
16.1318	-176.799	1	2	1
16.1735	-176.891	1	2	1
16.2152	-177.207	1	2	1
16.2568	-177.462	1	2	1
16.2985	-177.737	1	2	1
16.3402	-177.9	1	2	1
16.3818	-178.124	1	2	1
16.4235	-178.318	1	2	1
16.4652	-178.532	1	2	1
16.5068	-178.695	1	2	1
16.5485	-178.97	1	2	1
16.5902	-179.174	1	2	1
16.6318	-179.368	1	2	1
16.6735	-179.582	1	2	1
16.7152	-179.867	1	2	1
16.7568	-180.122	1	2	1
16.7985	-180.387	1	2	1
16.8402	-180.652	1	2	1
16.8818	-180.907	1	2	1
16.9235	-181.142	1	2	1
16.9652	-181.407	1	2	1
17.0068	-181.468	1	2	1
17.0485	-181.753	1	2	1
17.0902	-180.102	1	2	1
17.1318	-182.314	1	2	1
17.1735	-182.579	1	2	1
17.2152	-182.864	1	2	1
17.2568	-183.099	1	2	1
17.2985	-183.293	1	2	1
17.3402	-183.527	1	2	1
17.3818	-183.731	1	2	1
17.4235	-183.945	1	2	1
17.4652	-184.149	1	2	1
17.5138	-184.434	1	2	1
17.5555	-184.679	1	2	1
17.5971	-184.852	1	2	1
17.6388	-185.138	1	2	1
17.6805	-185.352	1	2	1
17.7221	-185.566	1	2	1
17.7638	-185.8	1	2	1
17.8055	-186.106	1	2	1
17.8471	-186.381	1	2	1
17.8888	-186.646	1	2	1
17.9305	-186.922	1	2	1
17.9721	-187.36	1	2	1
18.0138	-187.584	1	2	1
18.0555	-187.839	1	2	1
18.1041	-188.104	1	2	1
18.1457	-188.298	1	2	1
18.1874	-188.104	1	2	1
18.2291	-188.563	1	2	1
18.2707	-188.797	1	2	1
18.3124	-188.981	1	2	1
18.3541	-189.215	1	2	1
18.3957	-189.47	1	2	1
18.4374	-189.674	1	2	1
18.4791	-189.878	1	2	1
18.5207	-190.112	1	2	1
18.5624	-190.469	1	2	1
18.6041	-190.693	1	2	1
18.6457	-190.907	1	2	1
18.6874	-191.182	1	2	1
18.736	-191.468	1	2	1
18.7777	-191.794	1	2	1
18.8193	-192.018	1	2	1
18.861	-192.446	1	2	1
18.9027	-192.783	1	2	1
18.9443	-192.997	1	2	1
18.986	-193.252	1	2	1
19.0277	-193.568	1	2	1
19.0693	-194.088	1	2	1
19.118	-194.485	1	2	1
19.1596	-194.801	1	2	1
19.2013	-194.995	1	2	1
19.243	-195.352	1	2	1
19.2846	-195.28	1	2	1
19.3263	-195.657	1	2	1
19.368	-196.035	1	2	1
19.4096	-196.412	1	2	1
19.4513	-196.789	1	2	1
19.493	-197.187	1	2	1
19.5346	-197.554	1	2	1
19.5763	-197.91	1	2	1
19.618	-198.277	1	2	1
19.6596	-198.705	1	2	1
19.7013	-199.032	1	2	1
19.743	-199.327	1	2	1
19.7846	-199.623	1	2	1
19.8263	-200.031	1	2	1
19.868	-200.469	1	2	1
19.9096	-200.754	1	2	1
19.9513	-200.856	1	2	1
19.993	-201.427	1	2	1
20.0346	-201.978	1	2	1
20.0763	-202.365	1	2	1
20.118	-202.936	1	2	1
20.1596	-203.282	1	2	1
20.2013	-203.751	1	2	1
20.243	-204.363	1	2	1
20.2846	-204.944	1	2	1
20.3263	-205.576	1	2	1
20.368	-206.157	1	2	1
20.4096	-206.789	1	2	1
20.4513	-207.533	1	2	1
20.493	-208.226	1	2	1
20.5346	-209.001	1	2	1
20.5763	-209.419	1	2	1
20.618	-210.367	1	2	1
20.6596	-211.203	1	2	1
20.7013	-211.702	1	2	1
20.743	-212.477	1	2	1
20.7846	-213.211	1	2	1
20.8263	-214.098	1	2	1
20.868	-215.474	1	2	1
20.9096	-216.656	1	2	1
20.9513	-217.655	1	2	1
20.993	-218.593	1	2	1
21.0346	-219.378	1	2	1
21.0763	-220.336	1	2	1
21.118	-221.56	1	2	1
21.1596	-223.028	1	2	1
21.2013	-224.608	1	2	1
21.243	-226.106	1	2	1
21.2846	-227.625	1	2	1
21.3263	-229.235	1	2	1
21.368	-230.846	1	2	1
21.4096	-232.64	1	2	1
21.4513	-234.516	1	2	1
21.493	-236.177	1	2	1
21.5346	-238.338	1	2	1
21.5763	-239.959	1	2	1
21.618	-242.324	1	2	1
21.6596	-244.852	1	2	1
21.7013	-247.105	1	2	1
21.743	-249.653	1	2	1
21.7846	-252.538	1	2	1
21.8263	-255.301	1	2	1
21.868	-258.338	1	2	1
21.9096	-261.407	1	2	1
21.9513	-263.955	1	2	1
21.993	-267.411	1	2	1
22.0346	-271.764	1	2	1
22.0763	-276.871	1	2	1
22.118	-282.416	1	2	1
22.1596	-289.419	1	2	1
22.2013	-293.089	1	2	1
22.243	-293.925	1	2	1
22.2846	-300.724	1	2	1
22.3263	-306.524	1	2	1
22.368	-313.435	1	2	1
22.4096	-319.276	1	2	1
22.4513	-327.523	1	2	1
22.493	-335.372	1	2	1
22.5346	-346.361	1	2	1
22.5763	-357.278	1	2	1
22.618	-368.44	1	2	1
22.6596	-383.201	1	2	1
22.7013	-400.581	1	2	1
22.743	-416.442	1	2	1
22.7846	-436.85	1	2	1
22.8263	-455.26	1	2	1
22.868	-475.77	1	2	1
22.9096	-493.129	1	2	1
22.9513	-521.081	1	2	1
22.993	-558.145	1	2	1
23.0346	-600.683	1	2	1
23.0763	-654.414	1	2	1
23.118	-701.437	1	2	1
23.1596	-780.714	1	2	1
23.2013	-891.855	1	2	1
23.243	-985.505	1	2	1
23.2707	-1060.44	1	2	1
25.2499	-8970.44	1	2	1
0.00684625	-6.4526	1	1	1
0.0485129	-6.6055	1	1	1
0.0901796	-6.83996	1	1	1
0.131846	-6.80938	1	1	1
0.173513	-7.02345	1	1	1
0.21518	-7.21713	1	1	1
0.256846	-7.37003	1	1	1
0.298513	-7.54332	1	1	1
0.34018	-7.64526	1	1	1
0.381846	-7.75739	1	1	1
0.423513	-7.86952	1	1	1
0.46518	-7.95107	1	1	1
0.506846	-8.02243	1	1	1
0.548513	-8.09378	1	1	1
0.59018	-8.19572	1	1	1
0.638791	-8.28746	1	1	1
0.680457	-8.30785	1	1	1
0.722124	-8.43017	1	1	1
0.763791	-8.5423	1	1	1
0.805457	-8.61366	1	1	1
0.854068	-8.68502	1	1	1
0.895735	-8.78695	1	1	1
0.944346	-8.82773	1	1	1
0.986013	-8.95005	1	1	1
1.02768	-8.99083	1	1	1
1.06935	-9.07238	1	1	1
1.11101	-9.09276	1	1	1
1.15268	-9.23547	1	1	1
1.19435	-9.20489	1	1	1
1.23601	-9.08257	1	1	1
1.27768	-9.22528	1	1	1
1.31935	-9.32722	1	1	1
1.36101	-9.42915	1	1	1
1.40962	-9.44954	1	1	1
1.45824	-9.55148	1	1	1
1.4999	-9.57187	1	1	1
1.54157	-9.65341	1	1	1
1.58324	-9.69419	1	1	1
1.6249	-9.74516	1	1	1
1.66657	-9.81651	1	1	1
1.70824	-9.84709	1	1	1
1.7499	-9.80632	1	1	1
1.79157	-9.90826	1	1	1
1.83324	-9.98981	1	1	1
1.8749	-10.051	1	1	1
1.91657	-10.1223	1	1	1
1.95824	-10.2141	1	1	1
1.9999	-10.3262	1	1	1
2.04157	-10.4179	1	1	1
2.08324	-10.4893	1	1	1
2.1249	-10.6218	1	1	1
2.16657	-10.7238	1	1	1
2.20824	-10.7645	1	1	1
2.25685	-10.9378	1	1	1
2.30546	-11.0499	1	1	1
2.34712	-11.1111	1	1	1
2.38879	-11.1927	1	1	1
2.43046	-11.2029	1	1	1
2.47212	-11.2742	1	1	1
2.51379	-11.315	1	1	1
2.55546	-11.3761	1	1	1
2.59712	-11.4373	1	1	1
2.63879	-11.4985	1	1	1
2.68046	-11.58	1	1	1
2.72212	-11.682	1	1	1
2.76379	-11.7431	1	1	1
2.80546	-11.7941	1	1	1
2.84712	-11.8552	1	1	1
2.88879	-11.9368	1	1	1
2.93046	-12.0183	1	1	1
2.97212	-12.0387	1	1	1
3.01379	-12.0999	1	1	1
3.05546	-12.2222	1	1	1
3.09712	-12.314	1	1	1
3.13879	-12.3751	1	1	1
3.1874	-12.4363	1	1	1
3.22907	-12.5076	1	1	1
3.27074	-12.3547	1	1	1
3.3124	-12.4975	1	1	1
3.35407	-12.5586	1	1	1
3.39574	-12.528	1	1	1
3.4374	-12.6096	1	1	1
3.47907	-12.6606	1	1	1
3.52768	-12.7523	1	1	1
3.56935	-12.8033	1	1	1
3.61101	-12.8542	1	1	1
3.65268	-12.9256	1	1	1
3.69435	-12.9867	1	1	1
3.73601	-13.0377	1	1	1
3.77768	-13.0989	1	1	1
3.81935	-13.1498	1	1	1
3.86101	-13.2416	1	1	1
3.90268	-13.3028	1	1	1
3.95129	-13.3843	1	1	1
3.9999	-13.476	1	1	1
4.04157	-13.5576	1	1	1
4.08324	-13.6391	1	1	1
4.1249	-13.7309	1	1	1
4.16657	-13.8226	1	1	1
4.20824	-13.8328	1	1	1
4.25685	-13.9653	1	1	1
4.29851	-14.0367	1	1	1
4.34018	-14.1081	1	1	1
4.38185	-14.1692	1	1	1
4.42351	-14.1896	1	1	1
4.46518	-14.2508	1	1	1
4.50685	-14.3221	1	1	1
4.55546	-14.3833	1	1	1
4.60407	-14.4648	1	1	1
4.65268	-14.5566	1	1	1
4.69435	-14.6381	1	1	1
4.73601	-14.6993	1	1	1
4.77768	-14.8012	1	1	1
4.81935	-14.893	1	1	1
4.86101	-14.9949	1	1	1
4.90268	-15.0561	1	1	1
4.94435	-15.1274	1	1	1
4.98601	-15.2294	1	1	1
5.02768	-15.3415	1	1	1
5.06935	-15.4536	1	1	1
5.11101	-15.5657	1	1	1
5.15268	-15.6677	1	1	1
5.19435	-15.79	1	1	1
5.23601	-15.7594	1	1	1
5.27768	-15.8614	1	1	1
5.31935	-15.9429	1	1	1
5.36101	-16.0245	1	1	1
5.40268	-16.0856	1	1	1
5.44435	-16.157	1	1	1
5.48601	-16.2385	1	1	1
5.52768	-16.2793	1	1	1
5.56935	-16.3405	1	1	1
5.61101	-16.4118	1	1	1
5.65268	-16.4526	1	1	1
5.70129	-16.5443	1	1	1
5.74296	-16.6157	1	1	1
5.79157	-16.6769	1	1	1
5.83324	-16.738	1	1	1
5.8749	-16.8298	1	1	1
5.91657	-16.8196	1	1	1
5.95824	-16.9521	1	1	1
5.9999	-17.0744	1	1	1
6.04157	-17.1865	1	1	1
6.08324	-17.3191	1	1	1
6.1249	-17.4312	1	1	1
6.16657	-17.5943	1	1	1
6.20824	-17.6962	1	1	1
6.2499	-17.8084	1	1	1
6.29157	-17.8695	1	1	1
6.33324	-17.9511	1	1	1
6.3749	-18.002	1	1	1
6.41657	-18.0836	1	1	1
6.45824	-18.0938	1	1	1
6.4999	-18.1651	1	1	1
6.54157	-18.2365	1	1	1
6.58324	-18.2977	1	1	1
6.6249	-18.3588	1	1	1
6.66657	-18.4302	1	1	1
6.70824	-18.5423	1	1	1
6.7499	-18.6239	1	1	1
6.79157	-18.6952	1	1	1
6.83324	-18.7768	1	1	1
6.8749	-18.8481	1	1	1
6.91657	-18.8889	1	1	1
6.95824	-18.9704	1	1	1
6.9999	-19.052	1	1	1
7.04157	-19.1233	1	1	1
7.08324	-19.1947	1	1	1
7.1249	-19.2762	1	1	1
7.16657	-19.0112	1	1	1
7.20824	-19.4088	1	1	1
7.2499	-19.4801	1	1	1
7.29157	-19.5617	1	1	1
7.33324	-19.6228	1	1	1
7.3749	-19.6534	1	1	1
7.42351	-19.7554	1	1	1
7.46518	-19.8063	1	1	1
7.50685	-19.8879	1	1	1
7.54851	-19.9592	1	1	1
7.59018	-20.0306	1	1	1
7.63185	-20.0917	1	1	1
7.67351	-20.1631	1	1	1
7.71518	-20.2752	1	1	1
7.75685	-20.3568	1	1	1
7.79851	-20.4485	1	1	1
7.84018	-20.5199	1	1	1
7.88185	-20.6218	1	1	1
7.92351	-20.7034	1	1	1
7.96518	-20.8155	1	1	1
8.00685	-20.9072	1	1	1
8.04851	-20.999	1	1	1
8.09018	-21.1111	1	1	1
8.13185	-21.213	1	1	1
8.17351	-21.315	1	1	1
8.21518	-21.3965	1	1	1
8.25685	-21.4781	1	1	1
8.29851	-21.6004	1	1	1
8.34018	-21.7023	1	1	1
8.38185	-21.8247	1	1	1
8.42351	-21.947	1	1	1
8.46518	-22.0591	1	1	1
8.50685	-22.1916	1	1	1
8.54851	-22.3242	1	1	1
8.59018	-22.4669	1	1	1
8.63185	-22.5994	1	1	1
8.67351	-22.7319	1	1	1
8.71518	-22.8542	1	1	1
8.75685	-23.0377	1	1	1
8.79851	-23.16	1	1	1
8.84712	-23.3537	1	1	1
8.88879	-23.5372	1	1	1
8.93046	-23.6493	1	1	1
8.97212	-23.8532	1	1	1
9.01379	-24.0571	1	1	1
9.05546	-24.2813	1	1	1
9.09712	-24.5158	1	1	1
9.13879	-24.7808	1	1	1
9.18046	-25.0051	1	1	1
9.22212	-25.2396	1	1	1
9.26379	-25.4434	1	1	1
9.30546	-25.6575	1	1	1
9.34712	-25.8614	1	1	1
9.38879	-26.0754	1	1	1
9.43046	-26.3303	1	1	1
9.47212	-26.5647	1	1	1
9.51379	-26.8094	1	1	1
9.55546	-27.0744	1	1	1
9.59712	-27.3191	1	1	1
9.63879	-27.5841	1	1	1
9.68046	-27.8695	1	1	1
9.72212	-28.1549	1	1	1
9.76379	-28.3996	1	1	1
9.80546	-28.7258	1	1	1
9.84712	-29.0418	1	1	1
9.88879	-29.3374	1	1	1
9.93046	-29.6228	1	1	1
9.97212	-29.9694	1	1	1
10.0138	-30.3058	1	1	1
10.0555	-30.7136	1	1	1
10.1041	-31.1213	1	1	1
10.1457	-31.5392	1	1	1
10.1874	-31.9368	1	1	1
10.2291	-32.3547	1	1	1
10.2707	-32.7727	1	1	1
10.3124	-33.211	1	1	1
10.3541	-33.6391	1	1	1
10.3957	-34.0979	1	1	1
10.4374	-34.5973	1	1	1
10.4791	-35.1274	1	1	1
10.5207	-35.6983	1	1	1
10.5624	-36.3099	1	1	1
10.6041	-36.84	1	1	1
10.6596	-37.686	1	1	1
10.7013	-38.3792	1	1	1
10.743	-39.0622	1	1	1
10.7846	-39.7554	1	1	1
10.8263	-40.4587	1	1	1
10.868	-41.2436	1	1	1
10.9096	-42.0693	1	1	1
10.9513	-42.9358	1	1	1
10.993	-43.8226	1	1	1
11.0346	-44.7503	1	1	1
11.0763	-45.8512	1	1	1
11.118	-46.84	1	1	1
11.1596	-47.9613	1	1	1
11.2013	-49.052	1	1	1
11.243	-50.2345	1	1	1
11.2846	-51.5189	1	1	1
11.3263	-52.8746	1	1	1
11.368	-54.21	1	1	1
11.4166	-55.9225	1	1	1
11.4582	-57.37	1	1	1
11.5068	-59.2762	1	1	1
11.5485	-60.9378	1	1	1
11.5902	-62.6096	1	1	1
11.6318	-64.3935	1	1	1
11.6735	-66.2589	1	1	1
11.7152	-67.9103	1	1	1
11.7568	-70.0102	1	1	1
11.7985	-71.9572	1	1	1
11.8402	-74.0469	1	1	1
11.8818	-76.2997	1	1	1
11.9235	-78.4404	1	1	1
11.9652	-80.5403	1	1	1
12.0068	-82.7217	1	1	1
12.0485	-84.842	1	1	1
12.0902	-86.8909	1	1	1
12.1318	-88.9602	1	1	1
12.1735	-90.9378	1	1	1
12.2152	-92.8848	1	1	1
12.2568	-94.8216	1	1	1
12.2985	-96.9521	1	1	1
12.3402	-98.9602	1	1	1
12.3818	-101.04	1	1	1
12.4235	-103.15	1	1	1
12.4652	-105.27	1	1	1
12.5068	-107.492	1	1	1
12.5485	-109.113	1	1	1
12.5902	-111.896	1	1	1
12.6318	-114.23	1	1	1
12.6735	-116.646	1	1	1
12.7221	-119.572	1	1	1
12.7638	-122.13	1	1	1
12.8055	-124.628	1	1	1
12.8471	-127.156	1	1	1
12.8888	-129.918	1	1	1
12.9305	-132.436	1	1	1
12.9721	-135.076	1	1	1
13.0138	-137.574	1	1	1
13.0555	-140.051	1	1	1
13.1041	-142.793	1	1	1
13.1457	-144.822	1	1	1
13.1874	-146.626	1	1	1
13.2291	-148.573	1	1	1
13.2707	-150.306	1	1	1
13.3124	-151.927	1	1	1
13.3541	-153.394	1	1	1
13.3957	-154.822	1	1	1
13.4374	-156.259	1	1	1
13.4791	-157.492	1	1	1
13.5207	-158.614	1	1	1
13.5624	-159.704	1	1	1
13.6041	-160.724	1	1	1
13.6457	-161.672	1	1	1
13.6874	-162.314	1	1	1
13.7291	-163.119	1	1	1
13.7707	-163.823	1	1	1
13.8124	-164.526	1	1	1
13.8541	-165.199	1	1	1
13.8957	-165.78	1	1	1
13.9374	-166.391	1	1	1
13.9791	-167.105	1	1	1
14.0207	-167.737	1	1	1
14.0624	-168.216	1	1	1
14.1041	-168.308	1	1	1
14.1457	-169.399	1	1	1
14.1874	-169.888	1	1	1
14.2291	-170.438	1	1	1
14.2707	-170.826	1	1	1
14.3124	-171.325	1	1	1
14.3541	-171.743	1	1	1
14.3957	-172.212	1	1	1
14.4374	-172.701	1	1	1
14.4791	-173.252	1	1	1
14.5207	-173.884	1	1	1
14.5624	-174.312	1	1	1
14.6041	-174.771	1	1	1
14.6457	-175.189	1	1	1
14.6943	-175.607	1	1	1
14.736	-175.81	1	1	1
14.7777	-175.719	1	1	1
14.8193	-176.055	1	1	1
14.861	-176.228	1	1	1
14.9027	-176.656	1	1	1
14.9443	-177.023	1	1	1
14.986	-177.278	1	1	1
15.0346	-177.941	1	1	1
15.0763	-178.104	1	1	1
15.118	-178.552	1	1	1
15.1596	-178.736	1	1	1
15.2013	-179.399	1	1	1
15.243	-179.806	1	1	1
15.2846	-180.153	1	1	1
15.3263	-180.612	1	1	1
15.368	-181.101	1	1	1
15.4096	-181.57	1	1	1
15.4513	-182.11	1	1	1
15.493	-182.722	1	1	1
15.5346	-183.313	1	1	1
15.5763	-183.914	1	1	1
15.618	-184.903	1	1	1
15.6596	-185.698	1	1	1
15.7013	-186.279	1	1	1
15.743	-186.983	1	1	1
15.7916	-188.155	1	1	1
15.8332	-189.195	1	1	1
15.8749	-190.296	1	1	1
15.9166	-191.427	1	1	1
15.9582	-192.661	1	1	1
16.0068	-194.251	1	1	1
16.0485	-195.698	1	1	1
16.0902	-197.554	1	1	1
16.1318	-199.582	1	1	1
16.1735	-201.59	1	1	1
16.2152	-204.179	1	1	1
16.2568	-206.809	1	1	1
16.2985	-209.592	1	1	1
16.3402	-213.496	1	1	1
16.3818	-216.738	1	1	1
16.4235	-221.274	1	1	1
16.4652	-225.923	1	1	1
16.5068	-231.131	1	1	1
16.5485	-237.788	1	1	1
16.5902	-244.903	1	1	1
16.6318	-254.139	1	1	1
16.6735	-265.484	1	1	1
16.7152	-279.276	1	1	1
16.7568	-295.8	1	1	1
16.7985	-312.304	1	1	1
16.8402	-334.679	1	1	1
16.8818	-360.754	1	1	1
16.9235	-395.719	1	1	1
19.3888	-8970.44	1	1	1
0.668449	0.758958	2	0	1000000
1.19739	0.730859	2	0	1000000
1.71143	0.708205	2	0	1000000
1.88242	0.700765	2	0	1000000
2.17968	0.681727	2	0	1000000
2.65033	0.657785	2	0	1000000
2.98596	0.64224	2	0	1000000
3.23443	0.630227	2	0	1000000
3.78025	0.610192	2	0	1000000
4.19923	0.592152	2	0	1000000
4.71564	0.571702	2	0	1000000
4.91561	0.56289	2	0	1000000
5.21949	0.546471	2	0	1000000
5.65994	0.529013	2	0	1000000
5.88886	0.520409	2	0	1000000
6.11694	0.50823	2	0	1000000
6.69574	0.484911	2	0	1000000
6.90428	0.477346	2	0	1000000
7.16514	0.468202	2	0	1000000
7.70658	0.450993	2	0	1000000
8.18172	0.434409	2	0	1000000
8.74894	0.411464	2	0	1000000
8.90887	0.404315	2	0	1000000
9.12636	0.392759	2	0	1000000
9.74589	0.361668	2	0	1000000
10.0914	0.344709	2	0	1000000
10.5782	0.320351	2	0	1000000
11.2049	0.288345	2	0	1000000
11.7132	0.26353	2	0	1000000
11.8878	0.255923	2	0	1000000
12.1036	0.246737	2	0	1000000
12.6928	0.220883	2	0	1000000
12.8928	0.212071	2	0	1000000
13.1856	0.199019	2	0	1000000
13.6839	0.179109	2	0	1000000
13.8762	0.172375	2	0	1000000
14.1041	0.164436	2	0	1000000
14.1193	0.163937	2	0	1000000
14.8217	0.142905	2	0	1000000
15.0436	0.13721	2	0	1000000
15.158	0.134342	2	0	1000000
15.7286	0.121914	2	0	1000000
15.883	0.118796	2	0	1000000
16.1626	0.112935	2	0	1000000
16.7463	0.101837	2	0	1000000
16.9864	0.0978884	2	0	1000000
17.1632	0.0949372	2	0	1000000
17.7405	0.0864162	2	0	1000000
18.1831	0.0802644	2	0	1000000
18.6978	0.0734475	2	0	1000000
18.9953	0.0698728	2	0	1000000
19.2783	0.0663397	2	0	1000000
19.6743	0.061227	2	0	1000000
20.1485	0.0550337	2	0	1000000
20.686	0.0478843	2	0	1000000
21.2115	0.0415662	2	0	1000000
21.7115	0.0363704	2	0	1000000
21.9618	0.0336686	2	0	1000000
22.0867	0.0324216	2	0	1000000
22.7248	0.026353	2	0	1000000
22.8968	0.024815	2	0	1000000
23.1053	0.0229446	2	0	1000000
23.8108	0.0170421	2	0	1000000
24.1448	0.0141325	2	0	1000000
24.8187	0.009103	2	0	1000000
25.278	0.0059024	2	0	1000000

## Sheet: tens_interpolation
		Datum / Zeit	Tension unten [hPa]	Tension oben [hPa]
m_bot	b_bot	2013-07-31 15:49:15	0.65	3.59
82.8	-3.43509e+06	2013-07-31 16:09:15	1.8	4.76
m_top	b_top	2013-07-31 15:53:59	0.921717	3.86644
84.24	-3.49483e+06	y = m*x+b
		AE unten [t]	AE oben [t]
		41227.2
			Brutto-Gewicht [g]	Netto-Gewicht [g]
-1.40314	58626.9	2013-08-23 17:58:52	382.99	12.72
		2013-08-24 10:54:53	382	11.73
-1.40314	58256.7	2013-08-24 06:49:00	382.24	11.9696
			AE unten
m_bot	b_bot	2012-11-12 09:52:24	595.08	28.48
-3.5343	146298	2012-11-15 10:52:20	584.33	17.73
m_top	b_top	2012-11-16 08:39:32	581.122	14.5216
-3.5343	145731	y = m*x+b
