# Supplementary material for: A pore-size classification for peat bogs derived from unsaturated hydraulic properties
Source: Copernicus journal article supplement (doi:10.5194/hess-21-6185-2017), 2017-12-07
Supplement: Supplementary file 10 [file G2_HYDRUS.xlsx]

## Sheet: Gewicht
Datum / Zeit	Brutto-Gewicht [g]	Netto-Gewicht [g]	Gewichtsänderung [g]	Zeit [d]	Theta [-]	Verdunstungsrate [cm/d]		Volumen	250
2013-07-31 15:03:42	586.33	216.13	0					Höhe	5
2013-08-01 07:30:01	579.41	209.21	-6.92	0.684941	0.8058	0.202061		A	50
2013-08-01 20:10:56	573.69	203.49	-12.64	1.21336	0.78292	0.216496		Theta0	0.83348
2013-08-02 08:31:57	568.47	198.27	-17.86	1.72795	0.76204	0.202877		Trockengewicht	7.76
2013-08-02 12:38:50	566.84	196.64	-19.49	1.8994	0.75552	0.190149		Ks (as in Ksat)
2013-08-02 19:05:09	563.41	193.21	-22.92	2.16767	0.7418	0.255707		delta System [g]	370.2
2013-08-03 07:03:47	557.75	187.55	-28.58	2.66673	0.71916	0.226828
2013-08-03 15:07:30	554.39	184.19	-31.94	3.00264	0.70572	0.200052
2013-08-03 20:42:43	551.98	181.78	-34.35	3.23543	0.69608	0.207052
2013-08-04 10:07:09	547.24	177.04	-39.09	3.79407	0.67712	0.169699
2013-08-04 19:57:21	543.26	173.06	-43.07	4.20393	0.6612	0.194214
2013-08-05 08:37:53	538.35	168.15	-47.98	4.73208	0.64156	0.185933
2013-08-05 13:25:53	536.48	166.28	-49.85	4.93207	0.63408	0.187005
2013-08-05 20:43:36	533	162.8	-53.33	5.23605	0.62016	0.228966
2013-08-06 06:56:05	529.14	158.94	-57.19	5.66138	0.60472	0.181504
2013-08-06 12:47:42	527.09	156.89	-59.24	5.90556	0.59652	0.167914
2013-08-06 18:15:55	524.54	154.34	-61.79	6.13349	0.58632	0.223751
2013-08-07 08:09:14	519.24	149.04	-67.09	6.71218	0.56512	0.18317
2013-08-07 13:09:49	517.47	147.27	-68.86	6.92092	0.55804	0.169595
2013-08-07 19:05:56	515.43	145.23	-70.9	7.16822	0.54988	0.164982
2013-08-08 08:24:58	511.25	141.05	-75.08	7.7231	0.53316	0.150662
2013-08-08 19:49:12	507.38	137.18	-78.95	8.19827	0.51768	0.16289
2013-08-09 09:06:52	501.97	131.77	-84.36	8.7522	0.49604	0.195332
2013-08-09 13:05:14	500.25	130.05	-86.08	8.91773	0.48916	0.207812
2013-08-09 18:29:13	497.73	127.53	-88.6	9.14272	0.47908	0.224011
2013-08-10 09:21:44	490.68	120.48	-95.65	9.76253	0.45088	0.227488
2013-08-10 17:20:22	486.99	116.79	-99.34	10.0949	0.43612	0.222034
2013-08-11 05:19:58	481.21	111.01	-105.12	10.5946	0.413	0.231333
2013-08-11 20:22:36	473.7	103.5	-112.63	11.2215	0.38296	0.239618
2013-08-12 08:08:08	468.01	97.81	-118.32	11.7114	0.3602	0.232267
2013-08-12 12:45:53	466	95.8	-120.33	11.9043	0.35216	0.208417
2013-08-12 17:56:39	463.81	93.61	-122.52	12.1201	0.3434	0.202957
2013-08-13 08:05:02	457.38	87.18	-128.95	12.7093	0.31768	0.218276
2013-08-13 12:53:09	455.18	84.98	-131.15	12.9093	0.30888	0.219913
2013-08-13 19:24:47	452.17	81.97	-134.16	13.1813	0.29684	0.221352
2013-08-14 07:52:21	446.51	76.31	-139.82	13.7005	0.2742	0.21805
2013-08-14 12:28:57	444.5	74.3	-141.83	13.8925	0.26616	0.209286
2013-08-14 17:57:11	442.12	71.92	-144.21	14.1205	0.25664	0.208832
2013-08-15 09:05:35	435.34	65.14	-150.99	14.7513	0.22952	0.21495
2013-08-15 16:30:18	432.19	61.99	-154.14	15.0601	0.21692	0.203996
2013-08-15 19:15:08	431.08	60.88	-155.25	15.1746	0.21248	0.193953
2013-08-16 08:56:47	426.38	56.18	-159.95	15.7452	0.19368	0.164741
2013-08-16 12:36:49	425.3	55.1	-161.03	15.898	0.18936	0.141354
2013-08-16 19:24:30	423.31	53.11	-163.02	16.1811	0.1814	0.140582
2013-08-17 09:21:25	419.82	49.62	-166.51	16.7623	0.16744	0.120098
2013-08-17 14:52:04	418.65	48.45	-167.68	16.9919	0.16276	0.10191
2013-08-17 19:25:19	417.73	47.53	-168.6	17.1817	0.15908	0.096965
2013-08-18 09:16:52	415.24	45.04	-171.09	17.7592	0.14912	0.0862385
2013-08-18 19:51:25	413.48	43.28	-172.85	18.1998	0.14208	0.0798803
2013-08-19 08:12:26	411.53	41.33	-174.8	18.7144	0.13428	0.0757878
2013-08-19 15:20:45	410.5	40.3	-175.83	19.0118	0.13016	0.0692585
2013-08-19 22:08:11	409.52	39.32	-176.81	19.2948	0.12624	0.0692722
2013-08-20 07:38:24	408.1	37.9	-178.23	19.6908	0.12056	0.0717204
2013-08-20 19:04:08	406.39	36.19	-179.94	20.167	0.11372	0.071818
2013-08-21 07:55:28	404.41	34.21	-181.92	20.7026	0.1058	0.073929
2013-08-21 20:34:56	402.65	32.45	-183.68	21.23	0.09876	0.0667408
2013-08-22 08:32:11	401.2	31	-185.13	21.7281	0.09296	0.0582231
2013-08-22 14:23:18	400.48	30.28	-185.85	21.9719	0.09008	0.0590573
2013-08-22 17:29:07	400.08	29.88	-186.25	22.101	0.08848	0.0619981
2013-08-23 08:51:17	398.34	28.14	-187.99	22.7414	0.08152	0.0543413
2013-08-23 12:58:38	397.87	27.67	-188.46	22.9132	0.07964	0.0547218
2013-08-23 17:59:08	397.34	27.14	-188.99	23.1218	0.07752	0.0507956
2013-08-24 10:55:11	395.54	25.34	-190.79	23.8274	0.07032	0.0510212
2013-08-24 18:58:59	394.64	24.44	-191.69	24.1634	0.06672	0.0535756
2013-08-25 11:06:33	392.94	22.74	-193.39	24.8353	0.05992	0.0506015
2013-08-25 22:10:47	391.76	21.56	-194.57	25.2966	0.0552	0.0511624
2013-08-26 08:19:18	390.69	20.49	-195.64	25.7192	0.05092	0.0506421
2013-08-26 17:28:49	389.75	19.55	-196.58	26.1008	0.04716	0.0492651
2013-08-27 07:45:00	388.31	18.11	-198.02	26.6954	0.0414	0.0484376
2013-08-27 16:42:47	387.51	17.31	-198.82	27.0688	0.0382	0.0428428
2013-08-28 08:43:56	386.14	15.94	-200.19	27.7363	0.03272	0.041051
2013-08-29 07:06:06	384.5	14.3	-201.83	28.6683	0.02616	0.035191
2013-08-30 08:59:15	382.602	12.4022		29.7469	0.0185688	0.035191

## Sheet: Tensionen
Datum / Zeit	Tension unten [hPa]	Tension oben [hPa]		Zeit [d]	MP bot(2) [cm]	MP top(1) [cm]		WÄGUNG START
2013-07-29 14:32:20	5.41	8.05		-2.02178	-5.51478	-8.20591		41486.6	-8.3894
2013-07-29 14:33:20	5.39	8.06		-2.02108	-5.49439	-8.21611		2013-07-31 15:03:42
2013-07-29 14:34:20	5.39	8.06		-2.02039	-5.49439	-8.21611
2013-07-29 14:35:20	5.41	8.07		-2.01969	-5.51478	-8.2263
2013-07-29 14:36:20	5.42	8.09		-2.019	-5.52497	-8.24669
2013-07-29 14:37:20	5.44	8.09		-2.0183	-5.54536	-8.24669
2013-07-29 14:38:20	5.45	8.11		-2.01761	-5.55556	-8.26707
2013-07-29 14:39:20	5.47	8.11		-2.01692	-5.57594	-8.26707
2013-07-29 14:40:20	5.49	8.13		-2.01622	-5.59633	-8.28746
2013-07-29 14:41:20	5.49	8.14		-2.01553	-5.59633	-8.29766
2013-07-29 14:42:20	5.51	8.15		-2.01483	-5.61672	-8.30785
2013-07-29 14:43:20	5.52	8.16		-2.01414	-5.62691	-8.31804
2013-07-29 14:44:20	5.53	8.17		-2.01344	-5.6371	-8.32824
2013-07-29 14:45:20	5.54	8.17		-2.01275	-5.6473	-8.32824
2013-07-29 14:46:20	5.54	8.19		-2.01205	-5.6473	-8.34862
2013-07-29 14:47:20	5.56	8.2		-2.01136	-5.66769	-8.35882
2013-07-29 14:48:20	5.57	8.2		-2.01067	-5.67788	-8.35882
2013-07-29 14:49:20	5.58	8.22		-2.00997	-5.68807	-8.3792
2013-07-29 14:50:20	5.59	8.23		-2.00928	-5.69827	-8.3894
2013-07-29 14:51:20	5.59	8.23		-2.00858	-5.69827	-8.3894
2013-07-29 14:52:20	5.37	8.02		-2.00789	-5.47401	-8.17533
2013-07-29 14:53:20	5.39	8.03		-2.00719	-5.49439	-8.18552
2013-07-29 14:54:20	5.4	8.03		-2.0065	-5.50459	-8.18552
2013-07-29 14:55:20	5.4	8.04		-2.0058	-5.50459	-8.19572
2013-07-29 14:56:20	5.41	8.05		-2.00511	-5.51478	-8.20591
2013-07-29 14:57:20	5.43	8.06		-2.00442	-5.53517	-8.21611
2013-07-29 14:58:20	3.97	6.6		-2.00372	-4.04689	-6.72783
2013-07-29 14:59:20	4.04	6.66		-2.00303	-4.11825	-6.78899
2013-07-29 15:00:20	4.07	6.7		-2.00233	-4.14883	-6.82977
2013-07-29 15:01:20	4.1	6.73		-2.00164	-4.17941	-6.86035
2013-07-29 15:02:20	4.12	6.76		-2.00094	-4.1998	-6.89093
2013-07-29 15:03:20	4.14	6.77		-2.00025	-4.22018	-6.90112
2013-07-29 15:04:20	4.16	6.79		-1.99955	-4.24057	-6.92151
2013-07-29 15:05:20	4.18	6.81		-1.99886	-4.26096	-6.9419
2013-07-29 15:06:20	4.19	6.82		-1.99817	-4.27115	-6.95209
2013-07-29 15:07:20	4.21	6.86		-1.99747	-4.29154	-6.99286
2013-07-29 15:08:20	4.22	6.87		-1.99678	-4.30173	-7.00306
2013-07-29 15:09:20	4.25	6.88		-1.99608	-4.33231	-7.01325
2013-07-29 15:10:20	4.25	6.89		-1.99539	-4.33231	-7.02345
2013-07-29 15:11:20	4.27	6.9		-1.99469	-4.3527	-7.03364
2013-07-29 15:12:20	4.28	6.91		-1.994	-4.3629	-7.04383
2013-07-29 15:13:20	4.29	6.92		-1.9933	-4.37309	-7.05403
2013-07-29 15:14:20	4.3	6.94		-1.99261	-4.38328	-7.07441
2013-07-29 15:15:20	4.32	6.95		-1.99192	-4.40367	-7.08461
2013-07-29 15:16:20	4.33	6.95		-1.99122	-4.41386	-7.08461
2013-07-29 15:17:20	4.34	6.97		-1.99053	-4.42406	-7.10499
2013-07-29 15:18:20	4.36	6.99		-1.98983	-4.44444	-7.12538
2013-07-29 15:19:20	4.37	7		-1.98914	-4.45464	-7.13558
2013-07-29 15:20:20	4.38	7.01		-1.98844	-4.46483	-7.14577
2013-07-29 15:21:20	4.39	7.02		-1.98775	-4.47503	-7.15596
2013-07-29 15:22:20	4.4	7.02		-1.98705	-4.48522	-7.15596
2013-07-29 15:23:20	4.41	7.03		-1.98636	-4.49541	-7.16616
2013-07-29 15:24:20	4.42	7.05		-1.98567	-4.50561	-7.18654
2013-07-29 15:25:20	4.43	7.05		-1.98497	-4.5158	-7.18654
2013-07-29 15:26:20	4.44	7.07		-1.98428	-4.52599	-7.20693
2013-07-29 15:27:20	4.45	7.08		-1.98358	-4.53619	-7.21713
2013-07-29 15:28:20	4.46	7.08		-1.98289	-4.54638	-7.21713
2013-07-29 15:29:20	4.47	7.09		-1.98219	-4.55657	-7.22732
2013-07-29 15:30:20	4.48	7.1		-1.9815	-4.56677	-7.23751
2013-07-29 15:31:20	4.49	7.11		-1.9808	-4.57696	-7.24771
2013-07-29 15:32:20	4.5	7.13		-1.98011	-4.58716	-7.26809
2013-07-29 15:42:20	4.59	7.21		-1.97317	-4.6789	-7.34964
2013-07-29 15:52:20	4.69	7.29		-1.96622	-4.78084	-7.43119
2013-07-29 16:02:20	4.76	7.38		-1.95928	-4.85219	-7.52294
2013-07-29 16:12:20	4.84	7.46		-1.95233	-4.93374	-7.60449
2013-07-29 16:22:20	4.93	7.54		-1.94539	-5.02548	-7.68603
2013-07-29 16:32:20	4.99	7.61		-1.93844	-5.08665	-7.75739
2013-07-29 16:42:20	5.05	7.67		-1.9315	-5.14781	-7.81855
2013-07-29 16:52:20	3.58	6.15		-1.92455	-3.64934	-6.26911
2013-07-29 17:02:20	3.78	6.39		-1.91761	-3.85321	-6.51376
2013-07-29 17:12:20	3.9	6.48		-1.91067	-3.97554	-6.6055
2013-07-29 17:22:20	3.92	6.51		-1.90372	-3.99592	-6.63609
2013-07-29 17:32:20	3.63	6.26		-1.89678	-3.70031	-6.38124
2013-07-29 17:42:20	3.73	6.35		-1.88983	-3.80224	-6.47299
2013-07-29 18:02:20	3.73	6.4		-1.87594	-3.80224	-6.52396
2013-07-29 18:12:20	3.91	6.55		-1.869	-3.98573	-6.67686
2013-07-29 18:22:20	3.98	6.61		-1.86205	-4.05708	-6.73802
2013-07-29 18:32:20	4.03	6.64		-1.85511	-4.10805	-6.7686
2013-07-29 18:42:20	4.07	6.68		-1.84817	-4.14883	-6.80938
2013-07-29 18:52:20	4.12	6.71		-1.84122	-4.1998	-6.83996
2013-07-29 19:02:20	4.1	6.69		-1.83428	-4.17941	-6.81957
2013-07-29 19:12:20	4.18	6.74		-1.82733	-4.26096	-6.87054
2013-07-29 19:22:20	4.2	6.77		-1.82039	-4.28135	-6.90112
2013-07-29 19:32:20	4.24	6.79		-1.81344	-4.32212	-6.92151
2013-07-29 19:42:20	4.22	6.81		-1.8065	-4.30173	-6.9419
2013-07-29 19:52:20	4.28	6.85		-1.79955	-4.3629	-6.98267
2013-07-29 20:02:20	4.21	6.79		-1.79261	-4.29154	-6.92151
2013-07-29 20:12:20	4.11	6.73		-1.78567	-4.1896	-6.86035
2013-07-29 20:22:20	4.16	6.78		-1.77872	-4.24057	-6.91131
2013-07-29 20:32:20	4.22	6.82		-1.77178	-4.30173	-6.95209
2013-07-29 20:42:20	4.25	6.83		-1.76483	-4.33231	-6.96228
2013-07-29 20:52:20	4.29	6.86		-1.75789	-4.37309	-6.99286
2013-07-29 21:02:20	4.31	6.91		-1.75094	-4.39348	-7.04383
2013-07-29 21:12:20	4.34	6.93		-1.744	-4.42406	-7.06422
2013-07-29 21:22:20	4.37	6.96		-1.73705	-4.45464	-7.0948
2013-07-29 21:32:20	4.4	6.99		-1.73011	-4.48522	-7.12538
2013-07-29 21:42:20	4.43	7.02		-1.72317	-4.5158	-7.15596
2013-07-29 21:52:20	4.48	7.04		-1.71622	-4.56677	-7.17635
2013-07-29 22:02:20	4.47	7.06		-1.70928	-4.55657	-7.19674
2013-07-29 22:12:20	4.52	7.1		-1.70233	-4.60754	-7.23751
2013-07-29 22:22:20	4.52	7.12		-1.69539	-4.60754	-7.2579
2013-07-29 22:32:20	4.58	7.15		-1.68844	-4.66871	-7.28848
2013-07-29 22:42:20	4.59	7.16		-1.6815	-4.6789	-7.29867
2013-07-29 22:52:20	4.57	7.16		-1.67455	-4.65851	-7.29867
2013-07-29 23:02:20	4.59	7.18		-1.66761	-4.6789	-7.31906
2013-07-29 23:12:20	4.63	7.19		-1.66067	-4.71967	-7.32926
2013-07-29 23:22:20	4.64	7.23		-1.65372	-4.72987	-7.37003
2013-07-29 23:32:20	4.61	7.2		-1.64678	-4.69929	-7.33945
2013-07-29 23:42:20	4.54	7.11		-1.63983	-4.62793	-7.24771
2013-07-29 23:52:20	4.57	7.15		-1.63289	-4.65851	-7.28848
2013-07-30 00:02:20	4.6	7.17		-1.62594	-4.68909	-7.30887
2013-07-30 00:12:20	4.66	7.19		-1.619	-4.75025	-7.32926
2013-07-30 00:22:20	4.65	7.23		-1.61205	-4.74006	-7.37003
2013-07-30 00:32:20	4.69	7.26		-1.60511	-4.78084	-7.40061
2013-07-30 00:42:20	4.61	7.2		-1.59817	-4.69929	-7.33945
2013-07-30 00:52:20	4.64	7.22		-1.59122	-4.72987	-7.35984
2013-07-30 01:02:20	4.67	7.25		-1.58428	-4.76045	-7.39042
2013-07-30 01:12:20	4.69	7.26		-1.57733	-4.78084	-7.40061
2013-07-30 01:22:20	4.71	7.28		-1.57039	-4.80122	-7.421
2013-07-30 01:32:20	4.73	7.31		-1.56344	-4.82161	-7.45158
2013-07-30 01:42:20	4.74	7.32		-1.5565	-4.8318	-7.46177
2013-07-30 01:52:20	4.79	7.34		-1.54955	-4.88277	-7.48216
2013-07-30 02:02:20	4.77	7.36		-1.54261	-4.86239	-7.50255
2013-07-30 02:12:20	4.79	7.37		-1.53567	-4.88277	-7.51274
2013-07-30 02:22:20	4.8	7.38		-1.52872	-4.89297	-7.52294
2013-07-30 02:32:20	4.81	7.38		-1.52178	-4.90316	-7.52294
2013-07-30 02:42:20	4.83	7.38		-1.51483	-4.92355	-7.52294
2013-07-30 02:52:20	4.83	7.4		-1.50789	-4.92355	-7.54332
2013-07-30 03:02:20	4.85	7.39		-1.50094	-4.94393	-7.53313
2013-07-30 03:12:20	4.85	7.4		-1.494	-4.94393	-7.54332
2013-07-30 03:22:20	4.84	7.42		-1.48705	-4.93374	-7.56371
2013-07-30 03:32:20	4.87	7.44		-1.48011	-4.96432	-7.5841
2013-07-30 03:42:20	4.88	7.45		-1.47317	-4.97452	-7.59429
2013-07-30 03:52:20	4.92	7.47		-1.46622	-5.01529	-7.61468
2013-07-30 04:02:20	4.91	7.49		-1.45928	-5.0051	-7.63507
2013-07-30 04:12:20	4.94	7.52		-1.45233	-5.03568	-7.66565
2013-07-30 04:22:20	4.97	7.53		-1.44539	-5.06626	-7.67584
2013-07-30 04:32:20	4.97	7.54		-1.43844	-5.06626	-7.68603
2013-07-30 04:42:20	4.98	7.56		-1.4315	-5.07645	-7.70642
2013-07-30 04:52:20	5.02	7.58		-1.42455	-5.11723	-7.72681
2013-07-30 05:02:20	5.04	7.6		-1.41761	-5.13761	-7.7472
2013-07-30 05:12:20	5.06	7.61		-1.41067	-5.158	-7.75739
2013-07-30 05:22:20	5.07	7.64		-1.40372	-5.1682	-7.78797
2013-07-30 05:32:20	5.09	7.66		-1.39678	-5.18858	-7.80836
2013-07-30 05:42:20	5.11	7.68		-1.38983	-5.20897	-7.82875
2013-07-30 05:52:20	5.12	7.69		-1.38289	-5.21916	-7.83894
2013-07-30 06:02:20	5.14	7.71		-1.37594	-5.23955	-7.85933
2013-07-30 06:12:20	5.17	7.72		-1.369	-5.27013	-7.86952
2013-07-30 06:22:20	5.16	7.75		-1.36205	-5.25994	-7.9001
2013-07-30 06:32:20	5.21	7.76		-1.35511	-5.31091	-7.9103
2013-07-30 06:42:20	5.21	7.78		-1.34817	-5.31091	-7.93068
2013-07-30 06:52:20	5.23	7.79		-1.34122	-5.33129	-7.94088
2013-07-30 07:02:20	5.23	7.8		-1.33428	-5.33129	-7.95107
2013-07-30 07:12:20	5.25	7.81		-1.32733	-5.35168	-7.96126
2013-07-30 07:22:20	5.26	7.83		-1.32039	-5.36188	-7.98165
2013-07-30 07:32:20	5.29	7.85		-1.31344	-5.39246	-8.00204
2013-07-30 07:42:20	5.3	7.86		-1.3065	-5.40265	-8.01223
2013-07-30 07:52:20	5.33	7.87		-1.29955	-5.43323	-8.02243
2013-07-30 08:02:20	5.34	7.9		-1.29261	-5.44343	-8.05301
2013-07-30 08:12:20	5.36	7.92		-1.28567	-5.46381	-8.07339
2013-07-30 08:22:20	5.38	7.92		-1.27872	-5.4842	-8.07339
2013-07-30 08:32:20	5.38	7.95		-1.27178	-5.4842	-8.10398
2013-07-30 08:42:20	5.4	7.96		-1.26483	-5.50459	-8.11417
2013-07-30 08:52:20	5.41	7.97		-1.25789	-5.51478	-8.12436
2013-07-30 09:02:20	5.4	7.97		-1.25094	-5.50459	-8.12436
2013-07-30 09:12:20	5.44	8		-1.244	-5.54536	-8.15494
2013-07-30 09:22:20	5.44	8		-1.23705	-5.54536	-8.15494
2013-07-30 09:32:20	5.45	8.02		-1.23011	-5.55556	-8.17533
2013-07-30 09:42:20	5.48	8.03		-1.22317	-5.58614	-8.18552
2013-07-30 09:52:20	5.49	8.04		-1.21622	-5.59633	-8.19572
2013-07-30 10:02:20	3.98	6.56		-1.20928	-4.05708	-6.68705
2013-07-30 10:12:20	4.13	6.68		-1.20233	-4.20999	-6.80938
2013-07-30 10:22:20	4.15	6.73		-1.19539	-4.23038	-6.86035
2013-07-30 10:32:20	3.62	6.17		-1.18844	-3.69011	-6.2895
2013-07-30 10:42:20	3.77	6.33		-1.1815	-3.84302	-6.4526
2013-07-30 10:52:20	3.82	6.37		-1.17455	-3.89399	-6.49337
2013-07-30 11:02:20	3.87	6.41		-1.16761	-3.94495	-6.53415
2013-07-30 11:12:20	3.88	6.45		-1.16067	-3.95515	-6.57492
2013-07-30 11:22:20	3.92	6.47		-1.15372	-3.99592	-6.59531
2013-07-30 11:32:20	3.95	6.52		-1.14678	-4.0265	-6.64628
2013-07-30 11:42:20	4	6.53		-1.13983	-4.07747	-6.65647
2013-07-30 11:52:20	4.01	6.56		-1.13289	-4.08767	-6.68705
2013-07-30 12:02:20	4.03	6.59		-1.12594	-4.10805	-6.71764
2013-07-30 12:12:20	4.06	6.62		-1.119	-4.13863	-6.74822
2013-07-30 12:22:20	4.08	6.6		-1.11205	-4.15902	-6.72783
2013-07-30 12:32:20	4.09	6.63		-1.10511	-4.16922	-6.75841
2013-07-30 12:42:20	4.11	6.66		-1.09817	-4.1896	-6.78899
2013-07-30 12:52:20	4.13	6.68		-1.09122	-4.20999	-6.80938
2013-07-30 13:02:20	4.15	6.7		-1.08428	-4.23038	-6.82977
2013-07-30 13:12:20	4.19	6.74		-1.07733	-4.27115	-6.87054
2013-07-30 13:22:20	4.21	6.76		-1.07039	-4.29154	-6.89093
2013-07-30 13:32:20	4.21	6.77		-1.06344	-4.29154	-6.90112
2013-07-30 13:42:20	4.24	6.8		-1.0565	-4.32212	-6.9317
2013-07-30 13:52:20	4.29	6.81		-1.04955	-4.37309	-6.9419
2013-07-30 14:02:20	4.28	6.84		-1.04261	-4.3629	-6.97248
2013-07-30 14:22:20	4.31	6.87		-1.02872	-4.39348	-7.00306
2013-07-30 14:32:20	4.34	6.87		-1.02178	-4.42406	-7.00306
2013-07-30 14:42:20	4.34	6.9		-1.01483	-4.42406	-7.03364
2013-07-30 14:52:20	4.37	6.9		-1.00789	-4.45464	-7.03364
2013-07-30 15:02:20	4.36	6.92		-1.00094	-4.44444	-7.05403
2013-07-30 15:12:20	4.39	6.94		-0.993999	-4.47503	-7.07441
2013-07-30 15:22:20	4.41	6.96		-0.987054	-4.49541	-7.0948
2013-07-30 15:32:20	4.4	6.95		-0.98011	-4.48522	-7.08461
2013-07-30 15:42:20	4.42	6.96		-0.973165	-4.50561	-7.0948
2013-07-30 15:52:20	4.43	6.99		-0.966221	-4.5158	-7.12538
2013-07-30 16:02:20	4.47	7.01		-0.959276	-4.55657	-7.14577
2013-07-30 16:12:20	4.48	7.03		-0.952332	-4.56677	-7.16616
2013-07-30 16:22:20	4.49	7.05		-0.945388	-4.57696	-7.18654
2013-07-30 16:32:20	4.53	7.05		-0.938443	-4.61774	-7.18654
2013-07-30 16:42:20	4.52	7.07		-0.931499	-4.60754	-7.20693
2013-07-30 16:52:20	4.54	7.08		-0.924554	-4.62793	-7.21713
2013-07-30 17:02:20	4.55	7.1		-0.91761	-4.63812	-7.23751
2013-07-30 17:12:20	4.56	7.11		-0.910665	-4.64832	-7.24771
2013-07-30 17:32:20	4.55	7.1		-0.896776	-4.63812	-7.23751
2013-07-30 17:42:20	4.59	7.14		-0.889832	-4.6789	-7.27829
2013-07-30 17:52:20	4.6	7.14		-0.882888	-4.68909	-7.27829
2013-07-30 18:02:20	4.63	7.17		-0.875943	-4.71967	-7.30887
2013-07-30 18:12:20	4.63	7.18		-0.868999	-4.71967	-7.31906
2013-07-30 18:22:20	4.68	7.19		-0.862054	-4.77064	-7.32926
2013-07-30 18:32:20	4.67	7.22		-0.85511	-4.76045	-7.35984
2013-07-30 18:42:20	4.71	7.22		-0.848165	-4.80122	-7.35984
2013-07-30 18:52:20	4.71	7.25		-0.841221	-4.80122	-7.39042
2013-07-30 19:02:20	4.72	7.26		-0.834276	-4.81142	-7.40061
2013-07-30 19:12:20	4.72	7.26		-0.827332	-4.81142	-7.40061
2013-07-30 19:22:20	4.74	7.29		-0.820388	-4.8318	-7.43119
2013-07-30 19:32:20	4.78	7.29		-0.813443	-4.87258	-7.43119
2013-07-30 19:42:20	4.77	7.31		-0.806499	-4.86239	-7.45158
2013-07-30 19:52:20	4.8	7.33		-0.799554	-4.89297	-7.47197
2013-07-30 20:02:20	4.77	7.32		-0.79261	-4.86239	-7.46177
2013-07-30 20:12:20	4.79	7.33		-0.785665	-4.88277	-7.47197
2013-07-30 20:22:20	4.8	7.34		-0.778721	-4.89297	-7.48216
2013-07-30 20:32:20	4.83	7.36		-0.771776	-4.92355	-7.50255
2013-07-30 20:42:20	4.84	7.38		-0.764832	-4.93374	-7.52294
2013-07-30 20:52:20	4.85	7.38		-0.757888	-4.94393	-7.52294
2013-07-30 21:02:20	4.88	7.4		-0.750943	-4.97452	-7.54332
2013-07-30 21:12:20	4.88	7.42		-0.743999	-4.97452	-7.56371
2013-07-30 21:22:20	4.94	7.43		-0.737054	-5.03568	-7.5739
2013-07-30 21:32:20	4.94	7.46		-0.73011	-5.03568	-7.60449
2013-07-30 21:42:20	4.95	7.49		-0.723165	-5.04587	-7.63507
2013-07-30 21:52:20	4.97	7.5		-0.716221	-5.06626	-7.64526
2013-07-30 22:02:20	5	7.52		-0.709276	-5.09684	-7.66565
2013-07-30 22:12:20	5.01	7.54		-0.702332	-5.10703	-7.68603
2013-07-30 22:22:20	5.03	7.56		-0.695388	-5.12742	-7.70642
2013-07-30 22:32:20	5.04	7.57		-0.688443	-5.13761	-7.71662
2013-07-30 22:42:20	5.07	7.6		-0.681499	-5.1682	-7.7472
2013-07-30 22:52:20	5.08	7.61		-0.674554	-5.17839	-7.75739
2013-07-30 23:02:20	5.1	7.62		-0.66761	-5.19878	-7.76758
2013-07-30 23:12:20	5.11	7.65		-0.660665	-5.20897	-7.79817
2013-07-30 23:22:20	5.14	7.67		-0.653721	-5.23955	-7.81855
2013-07-30 23:32:20	5.14	7.67		-0.646776	-5.23955	-7.81855
2013-07-30 23:42:20	5.17	7.69		-0.639832	-5.27013	-7.83894
2013-07-30 23:52:20	5.17	7.71		-0.632888	-5.27013	-7.85933
2013-07-31 00:02:20	5.18	7.72		-0.625943	-5.28033	-7.86952
2013-07-31 00:12:20	5.21	7.73		-0.618999	-5.31091	-7.87971
2013-07-31 00:22:20	5.22	7.75		-0.612054	-5.3211	-7.9001
2013-07-31 00:32:20	5.25	7.76		-0.60511	-5.35168	-7.9103
2013-07-31 00:42:20	5.25	7.78		-0.598165	-5.35168	-7.93068
2013-07-31 00:52:20	5.26	7.79		-0.591221	-5.36188	-7.94088
2013-07-31 01:02:20	5.29	7.81		-0.584276	-5.39246	-7.96126
2013-07-31 01:12:20	5.29	7.83		-0.577332	-5.39246	-7.98165
2013-07-31 01:22:20	5.31	7.84		-0.570388	-5.41284	-7.99185
2013-07-31 01:32:20	5.33	7.86		-0.563443	-5.43323	-8.01223
2013-07-31 01:42:20	5.34	7.86		-0.556499	-5.44343	-8.01223
2013-07-31 01:52:20	5.36	7.88		-0.549554	-5.46381	-8.03262
2013-07-31 02:02:20	5.38	7.9		-0.54261	-5.4842	-8.05301
2013-07-31 02:12:20	5.38	7.92		-0.535665	-5.4842	-8.07339
2013-07-31 02:22:20	5.41	7.93		-0.528721	-5.51478	-8.08359
2013-07-31 02:32:20	5.43	7.93		-0.521776	-5.53517	-8.08359
2013-07-31 02:42:20	5.44	7.94		-0.514832	-5.54536	-8.09378
2013-07-31 02:52:20	5.44	7.95		-0.507888	-5.54536	-8.10398
2013-07-31 03:02:20	5.45	7.97		-0.500943	-5.55556	-8.12436
2013-07-31 03:12:20	5.47	7.98		-0.493999	-5.57594	-8.13456
2013-07-31 03:22:20	5.47	7.99		-0.487054	-5.57594	-8.14475
2013-07-31 03:32:20	5.51	7.99		-0.48011	-5.61672	-8.14475
2013-07-31 03:42:20	5.52	8		-0.473165	-5.62691	-8.15494
2013-07-31 03:52:20	5.49	8.03		-0.466221	-5.59633	-8.18552
2013-07-31 04:02:20	5.5	8.04		-0.459276	-5.60652	-8.19572
2013-07-31 04:12:20	5.53	8.05		-0.452332	-5.6371	-8.20591
2013-07-31 04:22:20	5.56	8.06		-0.445388	-5.66769	-8.21611
2013-07-31 04:32:20	5.54	8.08		-0.438443	-5.6473	-8.23649
2013-07-31 04:42:20	5.53	8.06		-0.431499	-5.6371	-8.21611
2013-07-31 04:52:20	5.57	8.1		-0.424554	-5.67788	-8.25688
2013-07-31 05:02:20	5.58	8.09		-0.41761	-5.68807	-8.24669
2013-07-31 05:12:20	5.6	8.1		-0.410665	-5.70846	-8.25688
2013-07-31 05:22:20	5.6	8.1		-0.403721	-5.70846	-8.25688
2013-07-31 05:32:20	5.6	8.13		-0.396776	-5.70846	-8.28746
2013-07-31 05:42:20	5.63	8.15		-0.389832	-5.73904	-8.30785
2013-07-31 05:52:20	5.63	8.15		-0.382888	-5.73904	-8.30785
2013-07-31 06:02:20	5.63	8.16		-0.375943	-5.73904	-8.31804
2013-07-31 06:12:20	5.65	8.18		-0.368999	-5.75943	-8.33843
2013-07-31 06:22:20	5.67	8.18		-0.362054	-5.77982	-8.33843
2013-07-31 06:32:20	5.67	8.2		-0.35511	-5.77982	-8.35882
2013-07-31 06:42:20	5.69	8.19		-0.348165	-5.8002	-8.34862
2013-07-31 06:52:20	5.72	8.21		-0.341221	-5.83078	-8.36901
2013-07-31 07:02:20	5.71	8.23		-0.334276	-5.82059	-8.3894
2013-07-31 07:12:20	5.71	8.23		-0.327332	-5.82059	-8.3894
2013-07-31 07:22:20	5.71	8.23		-0.320388	-5.82059	-8.3894
2013-07-31 07:32:20	5.55	8.07		-0.313443	-5.65749	-8.2263
2013-07-31 07:42:20	5.39	7.9		-0.306499	-5.49439	-8.05301
2013-07-31 07:52:20	5.42	7.92		-0.299554	-5.52497	-8.07339
2013-07-31 08:02:20	5.42	7.95		-0.29261	-5.52497	-8.10398
2013-07-31 08:12:20	5.46	7.97		-0.285665	-5.56575	-8.12436
2013-07-31 08:22:20	5.47	7.99		-0.278721	-5.57594	-8.14475
2013-07-31 08:32:20	5.48	7.99		-0.271776	-5.58614	-8.14475
2013-07-31 08:42:20	5.49	8.01		-0.264832	-5.59633	-8.16514
2013-07-31 08:52:20	5.53	8.03		-0.257888	-5.6371	-8.18552
2013-07-31 09:02:20	3.64	6.15		-0.250943	-3.7105	-6.26911
2013-07-31 09:12:20	3.69	6.22		-0.243999	-3.76147	-6.34047
2013-07-31 09:22:20	3.78	6.3		-0.237054	-3.85321	-6.42202
2013-07-31 09:32:20	3.83	6.34		-0.23011	-3.90418	-6.46279
2013-07-31 09:42:20	3.88	6.39		-0.223165	-3.95515	-6.51376
2013-07-31 09:52:20	3.91	6.43		-0.216221	-3.98573	-6.55454
2013-07-31 10:02:20	3.93	6.45		-0.209276	-4.00612	-6.57492
2013-07-31 10:12:20	3.98	6.49		-0.202332	-4.05708	-6.6157
2013-07-31 10:22:20	4.01	6.52		-0.195388	-4.08767	-6.64628
2013-07-31 10:32:20	4.04	6.55		-0.188443	-4.11825	-6.67686
2013-07-31 10:42:20	4.05	6.56		-0.181499	-4.12844	-6.68705
2013-07-31 10:52:20	3.34	5.87		-0.174554	-3.40469	-5.98369
2013-07-31 11:02:20	3.44	5.94		-0.16761	-3.50663	-6.05505
2013-07-31 11:12:20	3.47	5.98		-0.160665	-3.53721	-6.09582
2013-07-31 11:22:20	3.51	6.02		-0.153721	-3.57798	-6.1366
2013-07-31 11:32:20	3.56	6.06		-0.146776	-3.62895	-6.17737
2013-07-31 11:42:20	3.55	6.06		-0.139832	-3.61876	-6.17737
2013-07-31 11:52:20	3.58	6.09		-0.132888	-3.64934	-6.20795
2013-07-31 12:02:20	3.61	6.12		-0.125943	-3.67992	-6.23853
2013-07-31 12:12:20	3.65	6.13		-0.118999	-3.72069	-6.24873
2013-07-31 12:22:20	3.67	6.18		-0.112054	-3.74108	-6.29969
2013-07-31 12:32:20	3.67	6.17		-0.10511	-3.74108	-6.2895
2013-07-31 12:42:20	3.66	6.18		-0.0981653	-3.73089	-6.29969
2013-07-31 12:52:20	3.69	6.2		-0.0912209	-3.76147	-6.32008
2013-07-31 13:02:20	3.71	6.21		-0.0842764	-3.78186	-6.33028
2013-07-31 13:12:20	3.75	6.22		-0.077332	-3.82263	-6.34047
2013-07-31 13:22:20	3.74	6.25		-0.0703876	-3.81244	-6.37105
2013-07-31 13:32:20	3.76	6.26		-0.0634431	-3.83282	-6.38124
2013-07-31 13:42:20	3.78	6.27		-0.0564987	-3.85321	-6.39144
2013-07-31 13:52:20	3.82	6.29		-0.0495542	-3.89399	-6.41182
2013-07-31 14:02:20	3.81	6.31		-0.0426098	-3.88379	-6.43221
2013-07-31 14:12:20	3.83	6.33		-0.0356653	-3.90418	-6.4526
2013-07-31 14:22:20	3.85	6.36		-0.0287209	-3.92457	-6.48318
2013-07-31 14:32:20	3.89	6.38		-0.0217764	-3.96534	-6.50357
2013-07-31 14:42:20	3.89	6.38		-0.014832	-3.96534	-6.50357
2013-07-31 14:46:40	3.9	6.38		-0.011826	-3.97554	-6.50357
2013-07-31 14:47:40	3.9	6.4		-0.0111315	-3.97554	-6.52396
2013-07-31 14:49:15	3.9	6.4		-0.0100309	-3.97554	-6.52396
2013-07-31 14:50:15	3.9	6.41		-0.00933648	-3.97554	-6.53415
2013-07-31 14:51:15	3.9	6.4		-0.00864204	-3.97554	-6.52396
2013-07-31 14:52:15	3.9	6.4		-0.00794759	-3.97554	-6.52396
2013-07-31 14:53:15	3.91	6.41		-0.00725315	-3.98573	-6.53415
2013-07-31 14:54:15	3.91	6.41		-0.0065587	-3.98573	-6.53415
2013-07-31 14:55:15	3.91	6.41		-0.00586426	-3.98573	-6.53415
2013-07-31 14:56:15	3.9	6.41		-0.00516981	-3.97554	-6.53415
2013-07-31 14:57:15	3.87	6.4		-0.00447537	-3.94495	-6.52396
2013-07-31 14:58:15	3.89	6.4		-0.00378092	-3.96534	-6.52396
2013-07-31 14:59:15	3.92	6.41		-0.00308648	-3.99592	-6.53415
2013-07-31 15:00:15	3.92	6.41		-0.00239204	-3.99592	-6.53415
2013-07-31 15:01:15	3.93	6.42		-0.00169759	-4.00612	-6.54434
2013-07-31 15:02:15	3.93	6.43		-0.00100315	-4.00612	-6.55454
2013-07-31 15:03:15	3.92	6.42		-0.000308702	-3.99592	-6.54434
2013-07-31 15:11:15	4.24	6.81		0.00524685	-4.32212	-6.9419
2013-07-31 15:12:15	3.82	6.57		0.0059413	-3.89399	-6.69725
2013-07-31 15:13:15	3.75	6.43		0.00663574	-3.82263	-6.55454
2013-07-31 15:14:15	3.76	6.39		0.00733019	-3.83282	-6.51376
2013-07-31 15:15:15	3.8	6.4		0.00802463	-3.8736	-6.52396
2013-07-31 15:16:15	3.83	6.42		0.00871908	-3.90418	-6.54434
2013-07-31 15:17:15	3.88	6.47		0.00941352	-3.95515	-6.59531
2013-07-31 15:18:15	3.91	6.49		0.010108	-3.98573	-6.6157
2013-07-31 15:19:15	3.92	6.5		0.0108024	-3.99592	-6.62589	2013-07-31 15:19:15
2013-07-31 15:20:15	3.93	6.52		0.0114969	-4.00612	-6.64628
2013-07-31 15:21:15	4	6.57		0.0121913	-4.07747	-6.69725
2013-07-31 15:22:15	4.07	6.59		0.0128857	-4.14883	-6.71764
2013-07-31 15:23:15	4.07	6.62		0.0135802	-4.14883	-6.74822
2013-07-31 15:24:15	4.11	6.64		0.0142746	-4.1896	-6.7686
2013-07-31 15:25:15	4.13	6.66		0.0149691	-4.20999	-6.78899
2013-07-31 15:26:15	4.13	6.68		0.0156635	-4.20999	-6.80938
2013-07-31 15:27:15	4.15	6.7		0.016358	-4.23038	-6.82977
2013-07-31 15:28:15	4.18	6.72		0.0170524	-4.26096	-6.85015
2013-07-31 15:29:15	4.2	6.74		0.0177469	-4.28135	-6.87054
2013-07-31 15:31:15	4.21	6.75		0.0191357	-4.29154	-6.88073
2013-07-31 15:32:15	4.23	6.76		0.0198302	-4.31193	-6.89093
2013-07-31 15:33:15	4.24	6.77		0.0205246	-4.32212	-6.90112
2013-07-31 15:34:15	4.26	6.78		0.0212191	-4.34251	-6.91131
2013-07-31 15:35:15	4.28	6.81		0.0219135	-4.3629	-6.9419
2013-07-31 15:37:15	4.3	6.82		0.0233024	-4.38328	-6.95209
2013-07-31 15:38:15	4.3	6.82		0.0239969	-4.38328	-6.95209
2013-07-31 15:39:15	4.32	6.83		0.0246913	-4.40367	-6.96228
2013-07-31 15:40:15	4.32	6.84		0.0253857	-4.40367	-6.97248
2013-07-31 15:41:15	4.33	6.86		0.0260802	-4.41386	-6.99286
2013-07-31 15:42:15	4.34	6.86		0.0267746	-4.42406	-6.99286
2013-07-31 15:43:15	4.34	6.86		0.0274691	-4.42406	-6.99286
2013-07-31 15:44:15	4.35	6.86		0.0281635	-4.43425	-6.99286
2013-07-31 15:45:15	4.37	6.89		0.028858	-4.45464	-7.02345
2013-07-31 15:46:15	4.37	6.86		0.0295524	-4.45464	-6.99286
2013-07-31 15:47:15	4.35	6.87		0.0302469	-4.43425	-7.00306
2013-07-31 15:48:15	4.39	6.9		0.0309413	-4.47503	-7.03364
2013-07-31 15:49:15	4.38	6.89		0.0316357	-4.46483	-7.02345
2013-07-31 15:59:15	4.42	6.91		0.0385802	-4.50561	-7.04383
2013-07-31 16:09:15	4.48	6.97		0.0455246	-4.56677	-7.10499
2013-07-31 16:19:15	4.49	7		0.0524691	-4.57696	-7.13558	2013-07-31 16:19:15
2013-07-31 16:29:15	4.56	7.05		0.0594135	-4.64832	-7.18654
2013-07-31 16:39:15	4.59	7.08		0.066358	-4.6789	-7.21713
2013-07-31 16:49:15	4.64	7.13		0.0733024	-4.72987	-7.26809
2013-07-31 16:59:15	4.7	7.19		0.0802469	-4.79103	-7.32926
2013-07-31 17:09:15	4.71	7.2		0.0871913	-4.80122	-7.33945
2013-07-31 17:19:15	4.78	7.26		0.0941357	-4.87258	-7.40061	2013-07-31 17:19:15
2013-07-31 17:29:15	4.81	7.3		0.10108	-4.90316	-7.44139
2013-07-31 17:39:15	4.84	7.32		0.108025	-4.93374	-7.46177
2013-07-31 17:49:15	4.87	7.36		0.114969	-4.96432	-7.50255
2013-07-31 17:59:15	4.9	7.34		0.121914	-4.9949	-7.48216
2013-07-31 18:09:15	4.94	7.42		0.128858	-5.03568	-7.56371
2013-07-31 18:19:15	4.98	7.46		0.135802	-5.07645	-7.60449	2013-07-31 18:19:15
2013-07-31 18:29:15	5.01	7.5		0.142747	-5.10703	-7.64526
2013-07-31 18:39:15	5.06	7.55		0.149691	-5.158	-7.69623
2013-07-31 18:49:15	5.1	7.6		0.156636	-5.19878	-7.7472
2013-07-31 18:59:15	5.13	7.62		0.16358	-5.22936	-7.76758
2013-07-31 19:09:15	5.18	7.67		0.170525	-5.28033	-7.81855
2013-07-31 19:19:15	5.23	7.71		0.177469	-5.33129	-7.85933	2013-07-31 19:19:15
2013-07-31 19:29:15	5.28	7.76		0.184414	-5.38226	-7.9103
2013-07-31 19:39:15	5.32	7.81		0.191358	-5.42304	-7.96126
2013-07-31 19:49:15	5.4	7.86		0.198302	-5.50459	-8.01223
2013-07-31 19:59:15	5.42	7.9		0.205247	-5.52497	-8.05301
2013-07-31 20:09:15	5.48	7.94		0.212191	-5.58614	-8.09378
2013-07-31 20:19:15	5.5	7.98		0.219136	-5.60652	-8.13456	2013-07-31 20:19:15
2013-07-31 20:29:15	5.56	8.01		0.22608	-5.66769	-8.16514
2013-07-31 20:39:15	5.6	8.07		0.233025	-5.70846	-8.2263
2013-07-31 20:49:15	5.62	8.11		0.239969	-5.72885	-8.26707
2013-07-31 20:59:15	5.67	8.16		0.246914	-5.77982	-8.31804
2013-07-31 21:09:15	5.72	8.2		0.253858	-5.83078	-8.35882
2013-07-31 21:19:15	5.77	8.25		0.260802	-5.88175	-8.40979	2013-07-31 21:19:15
2013-07-31 21:29:15	5.79	8.28		0.267747	-5.90214	-8.44037
2013-07-31 21:39:15	5.82	8.3		0.274691	-5.93272	-8.46075
2013-07-31 21:49:15	5.88	8.37		0.281636	-5.99388	-8.53211
2013-07-31 21:59:15	5.92	8.4		0.28858	-6.03466	-8.56269
2013-07-31 22:09:15	5.81	8.3		0.295525	-5.92253	-8.46075
2013-07-31 22:19:15	5.74	8.22		0.302469	-5.85117	-8.3792	2013-07-31 22:19:15
2013-07-31 22:29:15	5.81	8.27		0.309414	-5.92253	-8.43017
2013-07-31 22:39:15	5.79	8.28		0.316358	-5.90214	-8.44037
2013-07-31 22:49:15	5.87	8.36		0.323302	-5.98369	-8.52192
2013-07-31 22:59:15	5.92	8.41		0.330247	-6.03466	-8.57288
2013-07-31 23:09:15	5.96	8.44		0.337191	-6.07543	-8.60347
2013-07-31 23:19:15	6.01	8.49		0.344136	-6.1264	-8.65443	2013-07-31 23:19:15
2013-07-31 23:29:15	6.03	8.52		0.35108	-6.14679	-8.68502
2013-07-31 23:39:15	6.06	8.55		0.358025	-6.17737	-8.7156
2013-07-31 23:49:15	6.11	8.6		0.364969	-6.22834	-8.76656
2013-07-31 23:59:15	6.15	8.63		0.371914	-6.26911	-8.79715
2013-08-01 00:09:15	6.17	8.63		0.378858	-6.2895	-8.79715
2013-08-01 00:19:15	6.19	8.69		0.385802	-6.30989	-8.85831	2013-08-01 00:19:15
2013-08-01 00:29:15	6.24	8.73		0.392747	-6.36086	-8.89908
2013-08-01 00:39:15	6.27	8.76		0.399691	-6.39144	-8.92966
2013-08-01 00:49:15	6.29	8.78		0.406636	-6.41182	-8.95005
2013-08-01 00:59:15	6.34	8.83		0.41358	-6.46279	-9.00102
2013-08-01 01:09:15	6.37	8.86		0.420525	-6.49337	-9.0316
2013-08-01 01:19:15	6.4	8.89		0.427469	-6.52396	-9.06218	2013-08-01 01:19:15
2013-08-01 01:29:15	6.42	8.91		0.434414	-6.54434	-9.08257
2013-08-01 01:39:15	6.47	8.96		0.441358	-6.59531	-9.13354
2013-08-01 01:49:15	6.49	8.96		0.448302	-6.6157	-9.13354
2013-08-01 01:59:15	6.51	9		0.455247	-6.63609	-9.17431
2013-08-01 02:09:15	6.53	9.02		0.462191	-6.65647	-9.1947
2013-08-01 02:19:15	6.5	8.98		0.469136	-6.62589	-9.15392	2013-08-01 02:19:15
2013-08-01 02:29:15	6.51	8.99		0.47608	-6.63609	-9.16412
2013-08-01 02:39:15	6.54	9.02		0.483025	-6.66667	-9.1947
2013-08-01 02:49:15	6.56	9.06		0.489969	-6.68705	-9.23547
2013-08-01 02:59:15	6.62	9.1		0.496914	-6.74822	-9.27625
2013-08-01 03:09:15	6.66	9.12		0.503858	-6.78899	-9.29664
2013-08-01 03:19:15	6.68	9.14		0.510802	-6.80938	-9.31702	2013-08-01 03:19:15
2013-08-01 03:29:15	6.7	9.16		0.517747	-6.82977	-9.33741
2013-08-01 03:39:15	6.72	9.21		0.524691	-6.85015	-9.38838
2013-08-01 03:49:15	6.77	9.25		0.531636	-6.90112	-9.42915
2013-08-01 03:59:15	6.79	9.26		0.53858	-6.92151	-9.43935
2013-08-01 04:09:15	6.7	9.19		0.545525	-6.82977	-9.36799
2013-08-01 04:19:15	6.78	9.26		0.552469	-6.91131	-9.43935	2013-08-01 04:19:15
2013-08-01 04:29:15	6.82	9.29		0.559414	-6.95209	-9.46993
2013-08-01 04:39:15	6.83	9.29		0.566358	-6.96228	-9.46993
2013-08-01 04:49:15	6.84	9.32		0.573302	-6.97248	-9.50051
2013-08-01 04:59:15	6.72	9.21		0.580247	-6.85015	-9.38838
2013-08-01 05:09:15	6.81	9.3		0.587191	-6.9419	-9.48012
2013-08-01 05:19:15	6.88	9.35		0.594136	-7.01325	-9.53109	2013-08-01 05:19:15
2013-08-01 05:29:15	6.89	9.37		0.60108	-7.02345	-9.55148
2013-08-01 05:39:15	6.92	9.4		0.608025	-7.05403	-9.58206
2013-08-01 05:49:15	6.91	9.41		0.614969	-7.04383	-9.59225
2013-08-01 05:59:15	6.97	9.43		0.621914	-7.10499	-9.61264
2013-08-01 06:09:15	6.97	9.46		0.628858	-7.10499	-9.64322
2013-08-01 06:19:15	7.01	9.49		0.635802	-7.14577	-9.6738	2013-08-01 06:19:15
2013-08-01 06:29:15	7.03	9.49		0.642747	-7.16616	-9.6738
2013-08-01 06:39:15	7	9.49		0.649691	-7.13558	-9.6738
2013-08-01 06:49:15	7.05	9.54		0.656636	-7.18654	-9.72477
2013-08-01 06:59:15	7.06	9.54		0.66358	-7.19674	-9.72477
2013-08-01 07:09:15	7.08	9.57		0.670525	-7.21713	-9.75535
2013-08-01 07:19:15	7.09	9.58		0.677469	-7.22732	-9.76555	2013-08-01 07:19:15
2013-08-01 07:29:15	7.1	9.58		0.684414	-7.23751	-9.76555
2013-08-01 07:39:15	7.06	9.56		0.691358	-7.19674	-9.74516
2013-08-01 07:49:15	7.13	9.62		0.698302	-7.26809	-9.80632
2013-08-01 07:59:15	7.16	9.65		0.705247	-7.29867	-9.8369
2013-08-01 08:09:15	7.2	9.69		0.712191	-7.33945	-9.87768
2013-08-01 08:19:15	7.24	9.71		0.719136	-7.38022	-9.89806	2013-08-01 08:19:15
2013-08-01 08:29:15	7.26	9.72		0.72608	-7.40061	-9.90826
2013-08-01 08:39:15	7.29	9.76		0.733025	-7.43119	-9.94903
2013-08-01 08:59:15	7.32	9.8		0.746914	-7.46177	-9.98981
2013-08-01 09:09:15	7.34	9.82		0.753858	-7.48216	-10.0102
2013-08-01 09:19:15	7.38	9.85		0.760802	-7.52294	-10.0408
2013-08-01 09:29:15	7.39	9.87		0.767747	-7.53313	-10.0612	2013-08-01 09:29:15
2013-08-01 09:39:15	7.38	9.86		0.774691	-7.52294	-10.051
2013-08-01 09:49:15	7.42	9.9		0.781636	-7.56371	-10.0917
2013-08-01 09:59:15	7.44	9.92		0.78858	-7.5841	-10.1121
2013-08-01 10:09:15	7.42	9.9		0.795525	-7.56371	-10.0917
2013-08-01 10:19:15	7.45	9.93		0.802469	-7.59429	-10.1223
2013-08-01 10:29:15	7.41	9.9		0.809414	-7.55352	-10.0917	2013-08-01 10:29:15
2013-08-01 10:39:15	7.45	9.94		0.816358	-7.59429	-10.1325
2013-08-01 10:49:15	7.46	9.94		0.823302	-7.60449	-10.1325
2013-08-01 11:09:15	7.32	9.82		0.837191	-7.46177	-10.0102
2013-08-01 11:19:15	7.39	9.89		0.844136	-7.53313	-10.0815
2013-08-01 11:29:15	7.45	9.94		0.85108	-7.59429	-10.1325
2013-08-01 11:39:15	7.51	10		0.858025	-7.65545	-10.1937	2013-08-01 11:39:15
2013-08-01 11:49:15	7.56	10.01		0.864969	-7.70642	-10.2039
2013-08-01 11:59:15	7.5	9.99		0.871914	-7.64526	-10.1835
2013-08-01 12:09:15	7.55	10.04		0.878858	-7.69623	-10.2345
2013-08-01 12:19:15	7.57	10.07		0.885802	-7.71662	-10.265
2013-08-01 12:29:15	7.57	10.06		0.892747	-7.71662	-10.2548
2013-08-01 12:39:15	7.6	10.1		0.899691	-7.7472	-10.2956	2013-08-01 12:39:15
2013-08-01 12:49:15	7.64	10.13		0.906636	-7.78797	-10.3262
2013-08-01 12:59:15	7.63	10.12		0.91358	-7.77778	-10.316
2013-08-01 13:09:15	7.65	10.14		0.920525	-7.79817	-10.3364
2013-08-01 13:19:15	7.67	10.16		0.927469	-7.81855	-10.3568
2013-08-01 13:29:15	7.68	10.18		0.934414	-7.82875	-10.3772
2013-08-01 13:39:15	7.67	10.16		0.941358	-7.81855	-10.3568	2013-08-01 13:39:15
2013-08-01 13:49:15	7.72	10.2		0.948302	-7.86952	-10.3976
2013-08-01 13:59:15	7.72	10.22		0.955247	-7.86952	-10.4179
2013-08-01 14:09:15	7.75	10.24		0.962191	-7.9001	-10.4383
2013-08-01 14:19:15	7.79	10.28		0.969136	-7.94088	-10.4791
2013-08-01 14:29:15	7.82	10.29		0.97608	-7.97146	-10.4893
2013-08-01 14:39:15	7.81	10.3		0.983025	-7.96126	-10.4995	2013-08-01 14:39:15
2013-08-01 14:49:15	7.72	10.21		0.989969	-7.86952	-10.4077
2013-08-01 14:59:15	7.79	10.28		0.996914	-7.94088	-10.4791
2013-08-01 15:19:15	7.75	10.24		1.0108	-7.9001	-10.4383
2013-08-01 15:29:15	7.82	10.31		1.01775	-7.97146	-10.5097
2013-08-01 15:39:15	7.82	10.31		1.02469	-7.97146	-10.5097
2013-08-01 15:49:15	7.86	10.36		1.03164	-8.01223	-10.5607	2013-08-01 15:49:15
2013-08-01 15:59:15	7.83	10.29		1.03858	-7.98165	-10.4893
2013-08-01 16:09:15	7.84	10.32		1.04552	-7.99185	-10.5199
2013-08-01 16:19:15	7.84	10.32		1.05247	-7.99185	-10.5199
2013-08-01 16:29:15	7.86	10.34		1.05941	-8.01223	-10.5403
2013-08-01 16:39:15	7.89	10.38		1.06636	-8.04281	-10.581
2013-08-01 16:49:15	7.9	10.4		1.0733	-8.05301	-10.6014	2013-08-01 16:49:15
2013-08-01 16:59:15	7.91	10.4		1.08025	-8.0632	-10.6014
2013-08-01 17:09:15	7.92	10.41		1.08719	-8.07339	-10.6116
2013-08-01 17:19:15	7.95	10.45		1.09414	-8.10398	-10.6524
2013-08-01 17:29:15	7.86	10.36		1.10108	-8.01223	-10.5607
2013-08-01 17:39:15	7.91	10.41		1.10802	-8.0632	-10.6116
2013-08-01 17:49:15	7.89	10.38		1.11497	-8.04281	-10.581	2013-08-01 17:49:15
2013-08-01 17:59:15	7.93	10.42		1.12191	-8.08359	-10.6218
2013-08-01 18:09:15	7.98	10.47		1.12886	-8.13456	-10.6728
2013-08-01 18:19:15	7.89	10.36		1.1358	-8.04281	-10.5607
2013-08-01 18:29:15	7.94	10.43		1.14275	-8.09378	-10.632
2013-08-01 18:39:15	7.99	10.48		1.14969	-8.14475	-10.683
2013-08-01 18:49:15	8.03	10.52		1.15664	-8.18552	-10.7238	2013-08-01 18:49:15
2013-08-01 18:59:15	8.05	10.54		1.16358	-8.20591	-10.7441
2013-08-01 19:09:15	8.02	10.53		1.17052	-8.17533	-10.7339
2013-08-01 19:19:15	8.07	10.56		1.17747	-8.2263	-10.7645
2013-08-01 19:29:15	8.08	10.58		1.18441	-8.23649	-10.7849
2013-08-01 19:39:15	8.12	10.62		1.19136	-8.27727	-10.8257
2013-08-01 19:49:15	8.13	10.63		1.1983	-8.28746	-10.8359	2013-08-01 19:49:15
2013-08-01 19:59:15	8.17	10.67		1.20525	-8.32824	-10.8767
2013-08-01 20:09:15	8.19	10.68		1.21219	-8.34862	-10.8869
2013-08-01 20:19:15	8.07	10.54		1.21914	-8.2263	-10.7441
2013-08-01 20:39:15	7.78	10.3		1.23302	-7.93068	-10.4995
2013-08-01 20:49:15	7.97	10.5		1.23997	-8.12436	-10.7034
2013-08-01 20:59:15	8.1	10.61		1.24691	-8.25688	-10.8155	2013-08-01 20:59:15
2013-08-01 21:09:15	8.17	10.67		1.25386	-8.32824	-10.8767
2013-08-01 21:19:15	8.24	10.73		1.2608	-8.39959	-10.9378
2013-08-01 21:29:15	8.24	10.75		1.26775	-8.39959	-10.9582
2013-08-01 21:39:15	8.28	10.77		1.27469	-8.44037	-10.9786
2013-08-01 21:49:15	8.3	10.8		1.28164	-8.46075	-11.0092
2013-08-01 21:59:15	8.32	10.81		1.28858	-8.48114	-11.0194	2013-08-01 21:59:15
2013-08-01 22:09:15	8.36	10.82		1.29552	-8.52192	-11.0296
2013-08-01 22:19:15	8.37	10.85		1.30247	-8.53211	-11.0601
2013-08-01 22:29:15	8.39	10.86		1.30941	-8.5525	-11.0703
2013-08-01 22:39:15	8.34	10.83		1.31636	-8.50153	-11.0398
2013-08-01 22:49:15	8.36	10.85		1.3233	-8.52192	-11.0601
2013-08-01 22:59:15	8.39	10.87		1.33025	-8.5525	-11.0805	2013-08-01 22:59:15
2013-08-01 23:09:15	8.43	10.89		1.33719	-8.59327	-11.1009
2013-08-01 23:19:15	8.44	10.91		1.34414	-8.60347	-11.1213
2013-08-01 23:29:15	8.44	10.94		1.35108	-8.60347	-11.1519
2013-08-01 23:39:15	8.48	10.97		1.35802	-8.64424	-11.1825
2013-08-01 23:59:15	8.52	11.01		1.37191	-8.68502	-11.2232
2013-08-02 00:09:15	8.54	11.02		1.37886	-8.7054	-11.2334	2013-08-02 00:09:15
2013-08-02 00:19:15	8.55	11.04		1.3858	-8.7156	-11.2538
2013-08-02 00:29:15	8.57	11.05		1.39275	-8.73598	-11.264
2013-08-02 00:39:15	8.54	11.03		1.39969	-8.7054	-11.2436
2013-08-02 00:49:15	8.49	10.98		1.40664	-8.65443	-11.1927
2013-08-02 00:59:15	8.57	11.05		1.41358	-8.73598	-11.264
2013-08-02 01:09:15	8.59	11.08		1.42052	-8.75637	-11.2946	2013-08-02 01:09:15
2013-08-02 01:19:15	8.6	11.07		1.42747	-8.76656	-11.2844
2013-08-02 01:29:15	8.64	11.1		1.43441	-8.80734	-11.315
2013-08-02 01:39:15	8.65	11.12		1.44136	-8.81753	-11.3354
2013-08-02 01:49:15	8.63	11.11		1.4483	-8.79715	-11.3252
2013-08-02 01:59:15	8.68	11.15		1.45525	-8.84811	-11.366
2013-08-02 02:09:15	8.59	11.07		1.46219	-8.75637	-11.2844	2013-08-02 02:09:15
2013-08-02 02:19:15	8.65	11.13		1.46914	-8.81753	-11.3456
2013-08-02 02:29:15	8.66	11.14		1.47608	-8.82773	-11.3558
2013-08-02 02:39:15	8.71	11.18		1.48302	-8.8787	-11.3965
2013-08-02 02:49:15	8.74	11.2		1.48997	-8.90928	-11.4169
2013-08-02 03:09:15	8.71	11.19		1.50386	-8.8787	-11.4067
2013-08-02 03:19:15	8.74	11.22		1.5108	-8.90928	-11.4373	2013-08-02 03:19:15
2013-08-02 03:29:15	8.72	11.2		1.51775	-8.88889	-11.4169
2013-08-02 03:39:15	8.76	11.24		1.52469	-8.92966	-11.4577
2013-08-02 03:49:15	8.78	11.25		1.53164	-8.95005	-11.4679
2013-08-02 03:59:15	8.79	11.26		1.53858	-8.96024	-11.4781
2013-08-02 04:09:15	8.77	11.24		1.54552	-8.93986	-11.4577
2013-08-02 04:19:15	8.79	11.27		1.55247	-8.96024	-11.4883	2013-08-02 04:19:15
2013-08-02 04:29:15	8.81	11.29		1.55941	-8.98063	-11.5087
2013-08-02 04:39:15	8.83	11.31		1.56636	-9.00102	-11.5291
2013-08-02 04:49:15	8.84	11.31		1.5733	-9.01121	-11.5291
2013-08-02 04:59:15	8.87	11.34		1.58025	-9.04179	-11.5596
2013-08-02 05:09:15	8.9	11.35		1.58719	-9.07238	-11.5698
2013-08-02 05:19:15	8.89	11.37		1.59414	-9.06218	-11.5902	2013-08-02 05:19:15
2013-08-02 05:29:15	8.91	11.39		1.60108	-9.08257	-11.6106
2013-08-02 05:39:15	8.92	11.4		1.60802	-9.09276	-11.6208
2013-08-02 05:49:15	8.95	11.43		1.61497	-9.12334	-11.6514
2013-08-02 05:59:15	8.98	11.44		1.62191	-9.15392	-11.6616
2013-08-02 06:09:15	8.97	11.45		1.62886	-9.14373	-11.6718
2013-08-02 06:19:15	9	11.48		1.6358	-9.17431	-11.7023	2013-08-02 06:19:15
2013-08-02 06:29:15	8.98	11.45		1.64275	-9.15392	-11.6718
2013-08-02 06:39:15	8.99	11.45		1.64969	-9.16412	-11.6718
2013-08-02 06:49:15	9.01	11.5		1.65664	-9.18451	-11.7227
2013-08-02 06:59:15	9.03	11.5		1.66358	-9.20489	-11.7227
2013-08-02 07:09:15	9.04	11.52		1.67052	-9.21509	-11.7431
2013-08-02 07:29:15	9.04	11.52		1.68441	-9.21509	-11.7431	2013-08-02 07:29:15
2013-08-02 07:39:15	8.95	11.43		1.69136	-9.12334	-11.6514
2013-08-02 07:49:15	9	11.47		1.6983	-9.17431	-11.6922
2013-08-02 07:59:15	9.05	11.53		1.70525	-9.22528	-11.7533
2013-08-02 08:09:15	9.09	11.55		1.71219	-9.26606	-11.7737
2013-08-02 08:19:15	9.1	11.56		1.71914	-9.27625	-11.7839
2013-08-02 08:29:15	9.1	11.58		1.72608	-9.27625	-11.8043	2013-08-02 08:29:15
2013-08-02 08:39:15	8.87	11.36		1.73302	-9.04179	-11.58
2013-08-02 08:49:15	8.94	11.42		1.73997	-9.11315	-11.6412
2013-08-02 08:59:15	8.99	11.46		1.74691	-9.16412	-11.682
2013-08-02 09:09:15	9.04	11.51		1.75386	-9.21509	-11.7329
2013-08-02 09:19:15	9.09	11.55		1.7608	-9.26606	-11.7737
2013-08-02 09:29:15	9.12	11.59		1.76775	-9.29664	-11.8145	2013-08-02 09:29:15
2013-08-02 09:39:15	9.14	11.61		1.77469	-9.31702	-11.8349
2013-08-02 09:49:15	9.13	11.6		1.78164	-9.30683	-11.8247
2013-08-02 09:59:15	9.15	11.62		1.78858	-9.32722	-11.8451
2013-08-02 10:09:15	9.16	11.64		1.79552	-9.33741	-11.8654
2013-08-02 10:19:15	9.17	11.65		1.80247	-9.3476	-11.8756
2013-08-02 10:29:15	9.19	11.65		1.80941	-9.36799	-11.8756	2013-08-02 10:29:15
2013-08-02 10:39:15	9.17	11.65		1.81636	-9.3476	-11.8756
2013-08-02 10:49:15	9.23	11.68		1.8233	-9.40877	-11.9062
2013-08-02 10:59:15	9.2	11.65		1.83025	-9.37819	-11.8756
2013-08-02 11:09:15	9.16	11.64		1.83719	-9.33741	-11.8654
2013-08-02 11:19:15	9.23	11.68		1.84414	-9.40877	-11.9062
2013-08-02 11:29:15	9.24	11.71		1.85108	-9.41896	-11.9368	2013-08-02 11:29:15
2013-08-02 11:39:15	9.26	11.74		1.85802	-9.43935	-11.9674
2013-08-02 11:49:15	9.26	11.74		1.86497	-9.43935	-11.9674
2013-08-02 11:59:15	9.28	11.76		1.87191	-9.45973	-11.9878
2013-08-02 12:09:15	9.27	11.74		1.87886	-9.44954	-11.9674
2013-08-02 12:19:15	9.3	11.76		1.8858	-9.48012	-11.9878
2013-08-02 12:29:15	9.3	11.78		1.89275	-9.48012	-12.0082	2013-08-02 12:29:15
2013-08-02 12:39:15	9.23	11.6		1.89969	-9.40877	-11.8247
2013-08-02 12:49:15	9.12	11.6		1.90664	-9.29664	-11.8247
2013-08-02 12:59:15	9.21	11.68		1.91358	-9.38838	-11.9062
2013-08-02 13:09:15	9.26	11.74		1.92052	-9.43935	-11.9674
2013-08-02 13:19:15	9.32	11.78		1.92747	-9.50051	-12.0082
2013-08-02 13:29:15	9.33	11.8		1.93441	-9.5107	-12.0285	2013-08-02 13:29:15
2013-08-02 13:39:15	9.36	11.83		1.94136	-9.54128	-12.0591
2013-08-02 13:49:15	9.41	11.84		1.9483	-9.59225	-12.0693
2013-08-02 13:59:15	9.41	11.88		1.95525	-9.59225	-12.1101
2013-08-02 14:09:15	9.45	11.89		1.96219	-9.63303	-12.1203
2013-08-02 14:19:15	9.45	11.91		1.96914	-9.63303	-12.1407
2013-08-02 14:29:15	9.46	11.93		1.97608	-9.64322	-12.1611	2013-08-02 14:29:15
2013-08-02 14:39:15	9.46	11.94		1.98302	-9.64322	-12.1713
2013-08-02 14:49:15	9.48	11.95		1.98997	-9.66361	-12.1814
2013-08-02 14:59:15	9.5	11.93		1.99691	-9.684	-12.1611
2013-08-02 15:09:15	9.5	11.97		2.00386	-9.684	-12.2018
2013-08-02 15:19:15	9.53	12		2.0108	-9.71458	-12.2324
2013-08-02 15:29:15	9.55	12.02		2.01775	-9.73496	-12.2528	2013-08-02 15:29:15
2013-08-02 15:39:15	9.55	12.02		2.02469	-9.73496	-12.2528
2013-08-02 15:49:15	9.58	12.05		2.03164	-9.76555	-12.2834
2013-08-02 15:59:15	9.55	12.02		2.03858	-9.73496	-12.2528
2013-08-02 16:09:15	9.62	12.06		2.04552	-9.80632	-12.2936
2013-08-02 16:19:15	9.61	12.09		2.05247	-9.79613	-12.3242
2013-08-02 16:29:15	9.63	12.11		2.05941	-9.81651	-12.3445	2013-08-02 16:29:15
2013-08-02 16:39:15	9.63	12.12		2.06636	-9.81651	-12.3547
2013-08-02 16:49:15	9.65	12.14		2.0733	-9.8369	-12.3751
2013-08-02 16:59:15	9.67	12.16		2.08025	-9.85729	-12.3955
2013-08-02 17:19:15	9.69	12.19		2.09414	-9.87768	-12.4261
2013-08-02 17:29:15	9.65	12.14		2.10108	-9.8369	-12.3751
2013-08-02 17:39:15	9.7	12.18		2.10802	-9.88787	-12.4159	2013-08-02 17:39:15
2013-08-02 17:49:15	9.74	12.21		2.11497	-9.92864	-12.4465
2013-08-02 17:59:15	9.73	12.21		2.12191	-9.91845	-12.4465
2013-08-02 18:19:15	9.75	12.23		2.1358	-9.93884	-12.4669
2013-08-02 18:29:15	9.76	12.24		2.14275	-9.94903	-12.4771
2013-08-02 18:39:15	9.78	12.25		2.14969	-9.96942	-12.4873
2013-08-02 18:49:15	9.83	12.3		2.15664	-10.0204	-12.5382	2013-08-02 18:49:15
2013-08-02 18:59:15	9.84	12.29		2.16358	-10.0306	-12.528
2013-08-02 19:19:15	9.31	11.86		2.17747	-9.49032	-12.0897
2013-08-02 19:29:15	9.48	11.99		2.18441	-9.66361	-12.2222
2013-08-02 19:39:15	9.6	12.08		2.19136	-9.78593	-12.314
2013-08-02 19:49:15	9.64	12.13		2.1983	-9.82671	-12.3649
2013-08-02 19:59:15	9.71	12.2		2.20525	-9.89806	-12.4363	2013-08-02 19:59:15
2013-08-02 20:09:15	9.76	12.26		2.21219	-9.94903	-12.4975
2013-08-02 20:19:15	9.79	12.27		2.21914	-9.97961	-12.5076
2013-08-02 20:29:15	9.85	12.31		2.22608	-10.0408	-12.5484
2013-08-02 20:39:15	9.86	12.34		2.23302	-10.051	-12.579
2013-08-02 20:49:15	9.89	12.33		2.23997	-10.0815	-12.5688
2013-08-02 20:59:15	9.89	12.36		2.24691	-10.0815	-12.5994	2013-08-02 20:59:15
2013-08-02 21:09:15	9.91	12.38		2.25386	-10.1019	-12.6198
2013-08-02 21:19:15	9.93	12.4		2.2608	-10.1223	-12.6402
2013-08-02 21:29:15	9.94	12.4		2.26775	-10.1325	-12.6402
2013-08-02 21:39:15	9.99	12.45		2.27469	-10.1835	-12.6911
2013-08-02 21:49:15	10	12.47		2.28164	-10.1937	-12.7115
2013-08-02 21:59:15	10.02	12.49		2.28858	-10.2141	-12.7319	2013-08-02 21:59:15
2013-08-02 22:09:15	10.05	12.52		2.29552	-10.2446	-12.7625
2013-08-02 22:19:15	10.07	12.54		2.30247	-10.265	-12.7829
2013-08-02 22:29:15	10.11	12.56		2.30941	-10.3058	-12.8033
2013-08-02 22:39:15	10.1	12.57		2.31636	-10.2956	-12.8135
2013-08-02 22:49:15	10.13	12.6		2.3233	-10.3262	-12.844
2013-08-02 22:59:15	10.15	12.63		2.33025	-10.3466	-12.8746	2013-08-02 22:59:15
2013-08-02 23:09:15	10.15	12.63		2.33719	-10.3466	-12.8746
2013-08-02 23:19:15	10.17	12.65		2.34414	-10.367	-12.895
2013-08-02 23:29:15	10.21	12.67		2.35108	-10.4077	-12.9154
2013-08-02 23:39:15	10.22	12.69		2.35802	-10.4179	-12.9358
2013-08-02 23:49:15	10.24	12.7		2.36497	-10.4383	-12.946
2013-08-02 23:59:15	10.26	12.73		2.37191	-10.4587	-12.9766	2013-08-02 23:59:15
2013-08-03 00:09:15	10.28	12.75		2.37886	-10.4791	-12.9969
2013-08-03 00:19:15	10.3	12.77		2.3858	-10.4995	-13.0173
2013-08-03 00:29:15	10.29	12.76		2.39275	-10.4893	-13.0071
2013-08-03 00:39:15	10.29	12.76		2.39969	-10.4893	-13.0071
2013-08-03 00:49:15	10.32	12.79		2.40664	-10.5199	-13.0377
2013-08-03 00:59:15	10.33	12.81		2.41358	-10.5301	-13.0581	2013-08-03 00:59:15
2013-08-03 01:09:15	10.35	12.83		2.42052	-10.5505	-13.0785
2013-08-03 01:19:15	10.37	12.86		2.42747	-10.5708	-13.1091
2013-08-03 01:29:15	10.38	12.86		2.43441	-10.581	-13.1091
2013-08-03 01:39:15	10.4	12.88		2.44136	-10.6014	-13.1295
2013-08-03 01:49:15	10.43	12.9		2.4483	-10.632	-13.1498
2013-08-03 01:59:15	10.44	12.91		2.45525	-10.6422	-13.16	2013-08-03 01:59:15
2013-08-03 02:09:15	10.43	12.9		2.46219	-10.632	-13.1498
2013-08-03 02:19:15	10.41	12.88		2.46914	-10.6116	-13.1295
2013-08-03 02:29:15	10.47	12.92		2.47608	-10.6728	-13.1702
2013-08-03 02:39:15	10.47	12.94		2.48302	-10.6728	-13.1906
2013-08-03 02:49:15	10.48	12.95		2.48997	-10.683	-13.2008
2013-08-03 02:59:15	10.47	12.93		2.49691	-10.6728	-13.1804	2013-08-03 02:59:15
2013-08-03 03:09:15	10.49	12.96		2.50386	-10.6932	-13.211
2013-08-03 03:19:15	10.51	12.98		2.5108	-10.7136	-13.2314
2013-08-03 03:29:15	10.53	13.01		2.51775	-10.7339	-13.262
2013-08-03 03:39:15	10.55	13.02		2.52469	-10.7543	-13.2722
2013-08-03 03:49:15	10.56	13.04		2.53164	-10.7645	-13.2926
2013-08-03 03:59:15	10.56	13.04		2.53858	-10.7645	-13.2926	2013-08-03 03:59:15
2013-08-03 04:09:15	10.58	13.05		2.54552	-10.7849	-13.3028
2013-08-03 04:19:15	10.6	13.07		2.55247	-10.8053	-13.3231
2013-08-03 04:29:15	10.62	13.09		2.55941	-10.8257	-13.3435
2013-08-03 04:39:15	10.62	13.11		2.56636	-10.8257	-13.3639
2013-08-03 04:49:15	10.62	13.09		2.5733	-10.8257	-13.3435
2013-08-03 04:59:15	10.65	13.12		2.58025	-10.8563	-13.3741	2013-08-03 04:59:15
2013-08-03 05:09:15	10.67	13.13		2.58719	-10.8767	-13.3843
2013-08-03 05:19:15	10.68	13.15		2.59414	-10.8869	-13.4047
2013-08-03 05:29:15	10.69	13.15		2.60108	-10.897	-13.4047
2013-08-03 05:39:15	10.7	13.17		2.60802	-10.9072	-13.4251
2013-08-03 05:49:15	10.69	13.14		2.61497	-10.897	-13.3945
2013-08-03 05:59:15	10.72	13.19		2.62191	-10.9276	-13.4455	2013-08-03 05:59:15
2013-08-03 06:09:15	10.72	13.19		2.62886	-10.9276	-13.4455
2013-08-03 06:19:15	10.75	13.21		2.6358	-10.9582	-13.4659
2013-08-03 06:29:15	10.76	13.23		2.64275	-10.9684	-13.4862
2013-08-03 06:39:15	10.77	13.24		2.64969	-10.9786	-13.4964
2013-08-03 06:49:15	10.79	13.26		2.65664	-10.999	-13.5168
2013-08-03 06:59:15	10.8	13.27		2.66358	-11.0092	-13.527	2013-08-03 06:59:15
2013-08-03 07:09:15	10.51	12.99		2.67052	-10.7136	-13.2416
2013-08-03 07:19:15	10.59	13.05		2.67747	-10.7951	-13.3028
2013-08-03 07:39:15	10.7	13.17		2.69136	-10.9072	-13.4251
2013-08-03 07:49:15	10.76	13.24		2.6983	-10.9684	-13.4964
2013-08-03 07:59:15	10.79	13.26		2.70525	-10.999	-13.5168
2013-08-03 08:09:15	10.82	13.28		2.71219	-11.0296	-13.5372	2013-08-03 08:09:15
2013-08-03 08:19:15	10.84	13.31		2.71914	-11.0499	-13.5678
2013-08-03 08:29:15	10.83	13.3		2.72608	-11.0398	-13.5576
2013-08-03 08:39:15	10.87	13.33		2.73302	-11.0805	-13.5882
2013-08-03 08:49:15	10.84	13.31		2.73997	-11.0499	-13.5678
2013-08-03 08:59:15	10.87	13.33		2.74691	-11.0805	-13.5882
2013-08-03 09:19:15	10.89	13.36		2.7608	-11.1009	-13.6188	2013-08-03 09:19:15
2013-08-03 09:29:15	10.91	13.38		2.76775	-11.1213	-13.6391
2013-08-03 09:39:15	10.92	13.39		2.77469	-11.1315	-13.6493
2013-08-03 09:49:15	10.95	13.42		2.78164	-11.1621	-13.6799
2013-08-03 09:59:15	10.96	13.43		2.78858	-11.1723	-13.6901
2013-08-03 10:09:15	10.97	13.44		2.79552	-11.1825	-13.7003
2013-08-03 10:19:15	10.99	13.44		2.80247	-11.2029	-13.7003	2013-08-03 10:19:15
2013-08-03 10:29:15	10.97	13.45		2.80941	-11.1825	-13.7105
2013-08-03 10:39:15	10.99	13.45		2.81636	-11.2029	-13.7105
2013-08-03 10:49:15	11.01	13.48		2.8233	-11.2232	-13.7411
2013-08-03 10:59:15	11.05	13.52		2.83025	-11.264	-13.7819
2013-08-03 11:09:15	11.05	13.52		2.83719	-11.264	-13.7819
2013-08-03 11:19:15	11.05	13.52		2.84414	-11.264	-13.7819	2013-08-03 11:19:15
2013-08-03 11:29:15	11.07	13.53		2.85108	-11.2844	-13.792
2013-08-03 11:39:15	11.08	13.53		2.85802	-11.2946	-13.792
2013-08-03 11:49:15	11.1	13.56		2.86497	-11.315	-13.8226
2013-08-03 11:59:15	11.11	13.57		2.87191	-11.3252	-13.8328
2013-08-03 12:09:15	11.1	13.57		2.87886	-11.315	-13.8328
2013-08-03 12:19:15	11.12	13.59		2.8858	-11.3354	-13.8532	2013-08-03 12:19:15
2013-08-03 12:29:15	11.14	13.6		2.89275	-11.3558	-13.8634
2013-08-03 12:39:15	11.16	13.62		2.89969	-11.3761	-13.8838
2013-08-03 12:49:15	11.16	13.62		2.90664	-11.3761	-13.8838
2013-08-03 12:59:15	11.17	13.63		2.91358	-11.3863	-13.894
2013-08-03 13:09:15	11.2	13.66		2.92052	-11.4169	-13.9246
2013-08-03 13:19:15	11.17	13.6		2.92747	-11.3863	-13.8634	2013-08-03 13:19:15
2013-08-03 13:29:15	11.14	13.6		2.93441	-11.3558	-13.8634
2013-08-03 13:39:15	11.19	13.65		2.94136	-11.4067	-13.9144
2013-08-03 13:49:15	11.21	13.67		2.9483	-11.4271	-13.9348
2013-08-03 13:59:15	11.22	13.68		2.95525	-11.4373	-13.945
2013-08-03 14:09:15	11.23	13.69		2.96219	-11.4475	-13.9551
2013-08-03 14:19:15	11.25	13.71		2.96914	-11.4679	-13.9755	2013-08-03 14:19:15
2013-08-03 14:29:15	11.28	13.74		2.97608	-11.4985	-14.0061
2013-08-03 14:39:15	11.3	13.73		2.98302	-11.5189	-13.9959
2013-08-03 14:49:15	11.3	13.73		2.98997	-11.5189	-13.9959
2013-08-03 14:59:15	11.29	13.75		2.99691	-11.5087	-14.0163
2013-08-03 15:09:15	10.98	13.42		3.00386	-11.1927	-13.6799
2013-08-03 15:19:15	10.99	13.46		3.0108	-11.2029	-13.7207	2013-08-03 15:19:15
2013-08-03 15:39:15	11.14	13.6		3.02469	-11.3558	-13.8634
2013-08-03 15:49:15	11.19	13.65		3.03164	-11.4067	-13.9144
2013-08-03 15:59:15	11.26	13.69		3.03858	-11.4781	-13.9551
2013-08-03 16:09:15	11.29	13.75		3.04552	-11.5087	-14.0163
2013-08-03 16:19:15	11.32	13.77		3.05247	-11.5392	-14.0367
2013-08-03 16:29:15	11.34	13.79		3.05941	-11.5596	-14.0571	2013-08-03 16:29:15
2013-08-03 16:39:15	11.36	13.81		3.06636	-11.58	-14.0775
2013-08-03 16:49:15	11.37	13.83		3.0733	-11.5902	-14.0979
2013-08-03 16:59:15	11.4	13.85		3.08025	-11.6208	-14.1182
2013-08-03 17:09:15	11.42	13.87		3.08719	-11.6412	-14.1386
2013-08-03 17:19:15	11.43	13.85		3.09414	-11.6514	-14.1182
2013-08-03 17:29:15	11.43	13.88		3.10108	-11.6514	-14.1488	2013-08-03 17:29:15
2013-08-03 17:39:15	11.45	13.91		3.10802	-11.6718	-14.1794
2013-08-03 17:49:15	11.47	13.93		3.11497	-11.6922	-14.1998
2013-08-03 17:59:15	11.49	13.94		3.12191	-11.7125	-14.21
2013-08-03 18:09:15	11.49	13.95		3.12886	-11.7125	-14.2202
2013-08-03 18:19:15	11.5	13.96		3.1358	-11.7227	-14.2304
2013-08-03 18:29:15	11.52	13.97		3.14275	-11.7431	-14.2406	2013-08-03 18:29:15
2013-08-03 18:39:15	11.53	13.98		3.14969	-11.7533	-14.2508
2013-08-03 18:49:15	11.56	13.99		3.15664	-11.7839	-14.261
2013-08-03 18:59:15	11.57	14.01		3.16358	-11.7941	-14.2813
2013-08-03 19:09:15	11.57	14.03		3.17052	-11.7941	-14.3017
2013-08-03 19:19:15	11.61	14.04		3.17747	-11.8349	-14.3119
2013-08-03 19:29:15	11.59	14.05		3.18441	-11.8145	-14.3221	2013-08-03 19:29:15
2013-08-03 19:39:15	11.61	14.06		3.19136	-11.8349	-14.3323
2013-08-03 19:49:15	11.64	14.06		3.1983	-11.8654	-14.3323
2013-08-03 20:09:15	11.62	14.07		3.21219	-11.8451	-14.3425
2013-08-03 20:19:15	11.66	14.09		3.21914	-11.8858	-14.3629
2013-08-03 20:29:15	11.66	14.12		3.22608	-11.8858	-14.3935
2013-08-03 20:39:15	11.72	14.13		3.23302	-11.947	-14.4037	2013-08-03 20:39:15
2013-08-03 20:49:15	10.84	13.34		3.23997	-11.0499	-13.5984
2013-08-03 20:59:15	11.05	13.53		3.24691	-11.264	-13.792
2013-08-03 21:19:15	11.21	13.67		3.2608	-11.4271	-13.9348
2013-08-03 21:29:15	11.26	13.7		3.26775	-11.4781	-13.9653
2013-08-03 21:39:15	11.3	13.75		3.27469	-11.5189	-14.0163
2013-08-03 21:49:15	11.36	13.79		3.28164	-11.58	-14.0571	2013-08-03 21:49:15
2013-08-03 21:59:15	11.39	13.83		3.28858	-11.6106	-14.0979
2013-08-03 22:09:15	11.37	13.82		3.29552	-11.5902	-14.0877
2013-08-03 22:19:15	11.41	13.86		3.30247	-11.631	-14.1284
2013-08-03 22:39:15	11.5	13.93		3.31636	-11.7227	-14.1998
2013-08-03 22:49:15	11.52	13.96		3.3233	-11.7431	-14.2304
2013-08-03 22:59:15	11.56	14		3.33025	-11.7839	-14.2712	2013-08-03 22:59:15
2013-08-03 23:09:15	11.58	14.02		3.33719	-11.8043	-14.2915
2013-08-03 23:19:15	11.61	14.04		3.34414	-11.8349	-14.3119
2013-08-03 23:29:15	11.62	14.06		3.35108	-11.8451	-14.3323
2013-08-03 23:39:15	11.64	14.08		3.35802	-11.8654	-14.3527
2013-08-03 23:49:15	11.66	14.09		3.36497	-11.8858	-14.3629
2013-08-03 23:59:15	11.68	14.12		3.37191	-11.9062	-14.3935	2013-08-03 23:59:15
2013-08-04 00:09:15	11.69	14.14		3.37886	-11.9164	-14.4139
2013-08-04 00:19:15	11.71	14.15		3.3858	-11.9368	-14.4241
2013-08-04 00:29:15	11.71	14.16		3.39275	-11.9368	-14.4343
2013-08-04 00:39:15	11.72	14.17		3.39969	-11.947	-14.4444
2013-08-04 00:49:15	11.73	14.18		3.40664	-11.9572	-14.4546
2013-08-04 00:59:15	11.76	14.2		3.41358	-11.9878	-14.475	2013-08-04 00:59:15
2013-08-04 01:09:15	11.79	14.2		3.42052	-12.0183	-14.475
2013-08-04 01:19:15	11.79	14.23		3.42747	-12.0183	-14.5056
2013-08-04 01:29:15	11.8	14.24		3.43441	-12.0285	-14.5158
2013-08-04 01:39:15	11.83	14.26		3.44136	-12.0591	-14.5362
2013-08-04 01:49:15	11.84	14.28		3.4483	-12.0693	-14.5566
2013-08-04 01:59:15	11.87	14.29		3.45525	-12.0999	-14.5668	2013-08-04 01:59:15
2013-08-04 02:09:15	11.87	14.31		3.46219	-12.0999	-14.5872
2013-08-04 02:19:15	11.88	14.32		3.46914	-12.1101	-14.5973
2013-08-04 02:29:15	11.9	14.34		3.47608	-12.1305	-14.6177
2013-08-04 02:39:15	11.91	14.35		3.48302	-12.1407	-14.6279
2013-08-04 02:49:15	11.95	14.37		3.48997	-12.1814	-14.6483
2013-08-04 02:59:15	11.93	14.37		3.49691	-12.1611	-14.6483	2013-08-04 02:59:15
2013-08-04 03:09:15	11.96	14.4		3.50386	-12.1916	-14.6789
2013-08-04 03:19:15	11.97	14.4		3.5108	-12.2018	-14.6789
2013-08-04 03:29:15	11.98	14.43		3.51775	-12.212	-14.7095
2013-08-04 03:39:15	12	14.43		3.52469	-12.2324	-14.7095
2013-08-04 03:49:15	12.02	14.45		3.53164	-12.2528	-14.7299
2013-08-04 03:59:15	12.03	14.46		3.53858	-12.263	-14.7401	2013-08-04 03:59:15
2013-08-04 04:09:15	12.04	14.48		3.54552	-12.2732	-14.7604
2013-08-04 04:19:15	12.07	14.49		3.55247	-12.3038	-14.7706
2013-08-04 04:29:15	12.07	14.51		3.55941	-12.3038	-14.791
2013-08-04 04:39:15	12.1	14.53		3.56636	-12.3344	-14.8114
2013-08-04 04:49:15	12.1	14.54		3.5733	-12.3344	-14.8216
2013-08-04 04:59:15	12.11	14.55		3.58025	-12.3445	-14.8318	2013-08-04 04:59:15
2013-08-04 05:09:15	12.14	14.57		3.58719	-12.3751	-14.8522
2013-08-04 05:19:15	12.08	14.52		3.59414	-12.314	-14.8012
2013-08-04 05:29:15	12.13	14.57		3.60108	-12.3649	-14.8522
2013-08-04 05:39:15	12.14	14.57		3.60802	-12.3751	-14.8522
2013-08-04 05:49:15	12.16	14.59		3.61497	-12.3955	-14.8726
2013-08-04 05:59:15	12.17	14.61		3.62191	-12.4057	-14.893	2013-08-04 05:59:15
2013-08-04 06:09:15	12.18	14.62		3.62886	-12.4159	-14.9032
2013-08-04 06:19:15	12.2	14.64		3.6358	-12.4363	-14.9235
2013-08-04 06:29:15	12.2	14.64		3.64275	-12.4363	-14.9235
2013-08-04 06:39:15	12.23	14.66		3.64969	-12.4669	-14.9439
2013-08-04 06:49:15	12.22	14.67		3.65664	-12.4567	-14.9541
2013-08-04 06:59:15	12.25	14.68		3.66358	-12.4873	-14.9643	2013-08-04 06:59:15
2013-08-04 07:09:15	12.26	14.69		3.67052	-12.4975	-14.9745
2013-08-04 07:19:15	12.29	14.71		3.67747	-12.528	-14.9949
2013-08-04 07:29:15	12.29	14.72		3.68441	-12.528	-15.0051
2013-08-04 07:39:15	12.29	14.73		3.69136	-12.528	-15.0153
2013-08-04 07:49:15	12.31	14.74		3.6983	-12.5484	-15.0255
2013-08-04 07:59:15	12.33	14.75		3.70525	-12.5688	-15.0357	2013-08-04 07:59:15
2013-08-04 08:09:15	12.34	14.77		3.71219	-12.579	-15.0561
2013-08-04 08:19:15	12.37	14.79		3.71914	-12.6096	-15.0765
2013-08-04 08:29:15	12.36	14.79		3.72608	-12.5994	-15.0765
2013-08-04 08:39:15	12.38	14.82		3.73302	-12.6198	-15.107
2013-08-04 08:49:15	12.39	14.83		3.73997	-12.63	-15.1172
2013-08-04 08:59:15	12.4	14.84		3.74691	-12.6402	-15.1274	2013-08-04 08:59:15
2013-08-04 09:09:15	12.41	14.85		3.75386	-12.6504	-15.1376
2013-08-04 09:19:15	12.41	14.86		3.7608	-12.6504	-15.1478
2013-08-04 09:29:15	12.44	14.87		3.76775	-12.6809	-15.158
2013-08-04 09:39:15	12.45	14.89		3.77469	-12.6911	-15.1784
2013-08-04 09:49:15	12.47	14.9		3.78164	-12.7115	-15.1886
2013-08-04 09:59:15	12.46	14.91		3.78858	-12.7013	-15.1988	2013-08-04 09:59:15
2013-08-04 10:19:15	12.17	14.67		3.80247	-12.4057	-14.9541
2013-08-04 10:29:15	12.35	14.82		3.80941	-12.5892	-15.107
2013-08-04 10:39:15	12.45	14.9		3.81636	-12.6911	-15.1886
2013-08-04 10:49:15	12.51	14.93		3.8233	-12.7523	-15.2192
2013-08-04 10:59:15	12.55	14.99		3.83025	-12.7931	-15.2803
2013-08-04 11:09:15	12.57	15		3.83719	-12.8135	-15.2905	2013-08-04 11:09:15
2013-08-04 11:19:15	12.58	15.01		3.84414	-12.8236	-15.3007
2013-08-04 11:29:15	12.61	15.03		3.85108	-12.8542	-15.3211
2013-08-04 11:39:15	12.62	15.04		3.85802	-12.8644	-15.3313
2013-08-04 11:49:15	12.65	15.06		3.86497	-12.895	-15.3517
2013-08-04 11:59:15	12.65	15.07		3.87191	-12.895	-15.3619
2013-08-04 12:09:15	12.67	15.08		3.87886	-12.9154	-15.3721	2013-08-04 12:09:15
2013-08-04 12:19:15	12.68	15.1		3.8858	-12.9256	-15.3925
2013-08-04 12:29:15	12.69	15.11		3.89275	-12.9358	-15.4027
2013-08-04 12:39:15	12.7	15.12		3.89969	-12.946	-15.4128
2013-08-04 12:49:15	12.71	15.14		3.90664	-12.9562	-15.4332
2013-08-04 12:59:15	12.73	15.15		3.91358	-12.9766	-15.4434
2013-08-04 13:09:15	12.74	15.17		3.92052	-12.9867	-15.4638	2013-08-04 13:09:15
2013-08-04 13:19:15	12.75	15.18		3.92747	-12.9969	-15.474
2013-08-04 13:29:15	12.78	15.2		3.93441	-13.0275	-15.4944
2013-08-04 13:39:15	12.78	15.21		3.94136	-13.0275	-15.5046
2013-08-04 13:49:15	12.79	15.21		3.9483	-13.0377	-15.5046
2013-08-04 13:59:15	12.8	15.23		3.95525	-13.0479	-15.525
2013-08-04 14:09:15	12.82	15.24		3.96219	-13.0683	-15.5352	2013-08-04 14:09:15
2013-08-04 14:19:15	12.83	15.25		3.96914	-13.0785	-15.5454
2013-08-04 14:39:15	12.85	15.26		3.98302	-13.0989	-15.5556
2013-08-04 14:49:15	12.86	15.29		3.98997	-13.1091	-15.5861
2013-08-04 14:59:15	12.87	15.3		3.99691	-13.1193	-15.5963
2013-08-04 15:09:15	12.89	15.32		4.00386	-13.1397	-15.6167
2013-08-04 15:19:15	12.91	15.34		4.0108	-13.16	-15.6371	2013-08-04 15:19:15
2013-08-04 15:29:15	12.92	15.35		4.01775	-13.1702	-15.6473
2013-08-04 15:39:15	12.93	15.35		4.02469	-13.1804	-15.6473
2013-08-04 15:49:15	12.95	15.37		4.03164	-13.2008	-15.6677
2013-08-04 15:59:15	12.97	15.39		4.03858	-13.2212	-15.6881
2013-08-04 16:09:15	12.97	15.4		4.04552	-13.2212	-15.6983
2013-08-04 16:19:15	13.01	15.4		4.05247	-13.262	-15.6983	2013-08-04 16:19:15
2013-08-04 16:29:15	12.99	15.42		4.05941	-13.2416	-15.7187
2013-08-04 16:39:15	13.02	15.45		4.06636	-13.2722	-15.7492
2013-08-04 16:49:15	13.02	15.45		4.0733	-13.2722	-15.7492
2013-08-04 16:59:15	13.05	15.46		4.08025	-13.3028	-15.7594
2013-08-04 17:09:15	13.07	15.46		4.08719	-13.3231	-15.7594
2013-08-04 17:19:15	13.06	15.49		4.09414	-13.3129	-15.79	2013-08-04 17:19:15
2013-08-04 17:29:15	13.09	15.49		4.10108	-13.3435	-15.79
2013-08-04 17:39:15	13.08	15.51		4.10802	-13.3333	-15.8104
2013-08-04 17:49:15	13.1	15.52		4.11497	-13.3537	-15.8206
2013-08-04 17:59:15	13.11	15.54		4.12191	-13.3639	-15.841
2013-08-04 18:09:15	13.12	15.55		4.12886	-13.3741	-15.8512
2013-08-04 18:19:15	13.13	15.56		4.1358	-13.3843	-15.8614	2013-08-04 18:19:15
2013-08-04 18:29:15	13.14	15.57		4.14275	-13.3945	-15.8716
2013-08-04 18:39:15	13.16	15.59		4.14969	-13.4149	-15.8919
2013-08-04 18:49:15	13.15	15.58		4.15664	-13.4047	-15.8818
2013-08-04 18:59:15	13.19	15.6		4.16358	-13.4455	-15.9021
2013-08-04 19:09:15	13.19	15.62		4.17052	-13.4455	-15.9225
2013-08-04 19:19:15	13.21	15.62		4.17747	-13.4659	-15.9225	2013-08-04 19:19:15
2013-08-04 19:29:15	13.17	15.57		4.18441	-13.4251	-15.8716
2013-08-04 19:39:15	13.21	15.61		4.19136	-13.4659	-15.9123
2013-08-04 19:49:15	13.23	15.64		4.1983	-13.4862	-15.9429
2013-08-04 19:59:15	12.59	15.16		4.20525	-12.8338	-15.4536
2013-08-04 20:09:15	12.79	15.25		4.21219	-13.0377	-15.5454
2013-08-04 20:19:15	12.94	15.4		4.21914	-13.1906	-15.6983	2013-08-04 20:19:15
2013-08-04 20:29:15	13.03	15.49		4.22608	-13.2824	-15.79
2013-08-04 20:39:15	13.09	15.55		4.23302	-13.3435	-15.8512
2013-08-04 20:49:15	13.14	15.59		4.23997	-13.3945	-15.8919
2013-08-04 20:59:15	13.2	15.63		4.24691	-13.4557	-15.9327
2013-08-04 21:09:15	13.23	15.66		4.25386	-13.4862	-15.9633
2013-08-04 21:19:15	13.24	15.67		4.2608	-13.4964	-15.9735	2013-08-04 21:19:15
2013-08-04 21:29:15	13.25	15.68		4.26775	-13.5066	-15.9837
2013-08-04 21:39:15	13.27	15.7		4.27469	-13.527	-16.0041
2013-08-04 21:49:15	13.31	15.71		4.28164	-13.5678	-16.0143
2013-08-04 21:59:15	13.3	15.74		4.28858	-13.5576	-16.0449
2013-08-04 22:09:15	13.32	15.75		4.29552	-13.578	-16.055
2013-08-04 22:19:15	13.33	15.76		4.30247	-13.5882	-16.0652	2013-08-04 22:19:15
2013-08-04 22:29:15	13.35	15.77		4.30941	-13.6086	-16.0754
2013-08-04 22:39:15	13.37	15.79		4.31636	-13.629	-16.0958
2013-08-04 22:49:15	13.38	15.79		4.3233	-13.6391	-16.0958
2013-08-04 22:59:15	13.4	15.82		4.33025	-13.6595	-16.1264
2013-08-04 23:09:15	13.41	15.83		4.33719	-13.6697	-16.1366
2013-08-04 23:19:15	13.43	15.84		4.34414	-13.6901	-16.1468	2013-08-04 23:19:15
2013-08-04 23:29:15	13.42	15.84		4.35108	-13.6799	-16.1468
2013-08-04 23:39:15	13.44	15.86		4.35802	-13.7003	-16.1672
2013-08-04 23:49:15	13.47	15.86		4.36497	-13.7309	-16.1672
2013-08-04 23:59:15	13.47	15.9		4.37191	-13.7309	-16.208
2013-08-05 00:09:15	13.48	15.9		4.37886	-13.7411	-16.208
2013-08-05 00:19:15	13.5	15.92		4.3858	-13.7615	-16.2283	2013-08-05 00:19:15
2013-08-05 00:29:15	13.52	15.93		4.39275	-13.7819	-16.2385
2013-08-05 00:39:15	13.51	15.94		4.39969	-13.7717	-16.2487
2013-08-05 00:49:15	13.53	15.96		4.40664	-13.792	-16.2691
2013-08-05 00:59:15	13.55	15.96		4.41358	-13.8124	-16.2691
2013-08-05 01:09:15	13.56	15.98		4.42052	-13.8226	-16.2895
2013-08-05 01:19:15	13.58	15.99		4.42747	-13.843	-16.2997	2013-08-05 01:19:15
2013-08-05 01:29:15	13.57	16		4.43441	-13.8328	-16.3099
2013-08-05 01:39:15	13.59	16.01		4.44136	-13.8532	-16.3201
2013-08-05 01:49:15	13.6	16.02		4.4483	-13.8634	-16.3303
2013-08-05 01:59:15	13.61	16.04		4.45525	-13.8736	-16.3507
2013-08-05 02:09:15	13.63	16.05		4.46219	-13.894	-16.3609
2013-08-05 02:19:15	13.64	16.06		4.46914	-13.9042	-16.371	2013-08-05 02:19:15
2013-08-05 02:29:15	13.66	16.08		4.47608	-13.9246	-16.3914
2013-08-05 02:39:15	13.67	16.1		4.48302	-13.9348	-16.4118
2013-08-05 02:49:15	13.68	16.11		4.48997	-13.945	-16.422
2013-08-05 02:59:15	13.67	16.09		4.49691	-13.9348	-16.4016
2013-08-05 03:09:15	13.7	16.12		4.50386	-13.9653	-16.4322
2013-08-05 03:19:15	13.71	16.14		4.5108	-13.9755	-16.4526	2013-08-05 03:19:15
2013-08-05 03:29:15	13.71	16.14		4.51775	-13.9755	-16.4526
2013-08-05 03:39:15	13.74	16.16		4.52469	-14.0061	-16.473
2013-08-05 03:49:15	13.74	16.16		4.53164	-14.0061	-16.473
2013-08-05 03:59:15	13.75	16.18		4.53858	-14.0163	-16.4934
2013-08-05 04:09:15	13.77	16.19		4.54552	-14.0367	-16.5036
2013-08-05 04:19:15	13.79	16.21		4.55247	-14.0571	-16.524	2013-08-05 04:19:15
2013-08-05 04:29:15	13.78	16.21		4.55941	-14.0469	-16.524
2013-08-05 04:39:15	13.8	16.22		4.56636	-14.0673	-16.5341
2013-08-05 04:49:15	13.81	16.24		4.5733	-14.0775	-16.5545
2013-08-05 04:59:15	13.82	16.24		4.58025	-14.0877	-16.5545
2013-08-05 05:09:15	13.83	16.26		4.58719	-14.0979	-16.5749
2013-08-05 05:19:15	13.84	16.26		4.59414	-14.1081	-16.5749	2013-08-05 05:19:15
2013-08-05 05:29:15	13.85	16.29		4.60108	-14.1182	-16.6055
2013-08-05 05:39:15	13.87	16.29		4.60802	-14.1386	-16.6055
2013-08-05 05:49:15	13.88	16.31		4.61497	-14.1488	-16.6259
2013-08-05 05:59:15	13.9	16.32		4.62191	-14.1692	-16.6361
2013-08-05 06:09:15	13.9	16.33		4.62886	-14.1692	-16.6463
2013-08-05 06:19:15	13.92	16.35		4.6358	-14.1896	-16.6667	2013-08-05 06:19:15
2013-08-05 06:29:15	13.94	16.36		4.64275	-14.21	-16.6769
2013-08-05 06:39:15	13.96	16.38		4.64969	-14.2304	-16.6972
2013-08-05 06:49:15	13.96	16.39		4.65664	-14.2304	-16.7074
2013-08-05 06:59:15	13.97	16.4		4.66358	-14.2406	-16.7176
2013-08-05 07:09:15	13.98	16.42		4.67052	-14.2508	-16.738
2013-08-05 07:19:15	13.98	16.41		4.67747	-14.2508	-16.7278	2013-08-05 07:19:15
2013-08-05 07:29:15	14	16.42		4.68441	-14.2712	-16.738
2013-08-05 07:39:15	14.01	16.44		4.69136	-14.2813	-16.7584
2013-08-05 07:49:15	14.02	16.45		4.6983	-14.2915	-16.7686
2013-08-05 07:59:15	14.05	16.47		4.70525	-14.3221	-16.789
2013-08-05 08:09:15	14.06	16.47		4.71219	-14.3323	-16.789
2013-08-05 08:19:15	14.07	16.49		4.71914	-14.3425	-16.8094	2013-08-05 08:19:15
2013-08-05 08:29:15	14.08	16.51		4.72608	-14.3527	-16.8298
2013-08-05 08:39:15	13.89	16.28		4.73302	-14.159	-16.5953
2013-08-05 08:49:15	13.64	16.11		4.73997	-13.9042	-16.422
2013-08-05 08:59:15	13.86	16.27		4.74691	-14.1284	-16.5851
2013-08-05 09:09:15	13.93	16.38		4.75386	-14.1998	-16.6972
2013-08-05 09:19:15	14.01	16.45		4.7608	-14.2813	-16.7686	2013-08-05 09:19:15
2013-08-05 09:29:15	14.09	16.5		4.76775	-14.3629	-16.8196
2013-08-05 09:39:15	14.09	16.51		4.77469	-14.3629	-16.8298
2013-08-05 09:49:15	14.1	16.52		4.78164	-14.3731	-16.84
2013-08-05 09:59:15	14.14	16.53		4.78858	-14.4139	-16.8502
2013-08-05 10:09:15	14.15	16.54		4.79552	-14.4241	-16.8603
2013-08-05 10:19:15	14.14	16.56		4.80247	-14.4139	-16.8807	2013-08-05 10:19:15
2013-08-05 10:29:15	14.14	16.56		4.80941	-14.4139	-16.8807
2013-08-05 10:39:15	14.17	16.56		4.81636	-14.4444	-16.8807
2013-08-05 10:49:15	14.2	16.59		4.8233	-14.475	-16.9113
2013-08-05 10:59:15	14.18	16.6		4.83025	-14.4546	-16.9215
2013-08-05 11:09:15	14.19	16.6		4.83719	-14.4648	-16.9215
2013-08-05 11:19:15	14.21	16.62		4.84414	-14.4852	-16.9419	2013-08-05 11:19:15
2013-08-05 11:29:15	14.21	16.63		4.85108	-14.4852	-16.9521
2013-08-05 11:39:15	14.23	16.63		4.85802	-14.5056	-16.9521
2013-08-05 11:49:15	14.25	16.65		4.86497	-14.526	-16.9725
2013-08-05 11:59:15	14.23	16.65		4.87191	-14.5056	-16.9725
2013-08-05 12:09:15	14.25	16.67		4.87886	-14.526	-16.9929
2013-08-05 12:19:15	14.24	16.66		4.8858	-14.5158	-16.9827	2013-08-05 12:19:15
2013-08-05 12:29:15	14.27	16.69		4.89275	-14.5464	-17.0133
2013-08-05 12:39:15	14.28	16.69		4.89969	-14.5566	-17.0133
2013-08-05 12:49:15	14.29	16.72		4.90664	-14.5668	-17.0438
2013-08-05 12:59:15	14.3	16.73		4.91358	-14.577	-17.054
2013-08-05 13:09:15	14.31	16.73		4.92052	-14.5872	-17.054
2013-08-05 13:19:15	14.32	16.75		4.92747	-14.5973	-17.0744	2013-08-05 13:19:15
2013-08-05 13:29:15	14.26	16.68		4.93441	-14.5362	-17.0031
2013-08-05 13:39:15	14.31	16.73		4.94136	-14.5872	-17.054
2013-08-05 13:49:15	14.33	16.75		4.9483	-14.6075	-17.0744
2013-08-05 13:59:15	14.37	16.77		4.95525	-14.6483	-17.0948
2013-08-05 14:09:15	14.38	16.79		4.96219	-14.6585	-17.1152
2013-08-05 14:19:15	14.4	16.8		4.96914	-14.6789	-17.1254	2013-08-05 14:19:15
2013-08-05 14:29:15	14.4	16.8		4.97608	-14.6789	-17.1254
2013-08-05 14:39:15	14.42	16.83		4.98302	-14.6993	-17.156
2013-08-05 14:49:15	14.44	16.85		4.98997	-14.7197	-17.1764
2013-08-05 14:59:15	14.42	16.83		4.99691	-14.6993	-17.156
2013-08-05 15:09:15	14.45	16.86		5.00386	-14.7299	-17.1865
2013-08-05 15:19:15	14.48	16.88		5.0108	-14.7604	-17.2069	2013-08-05 15:19:15
2013-08-05 15:29:15	14.49	16.9		5.01775	-14.7706	-17.2273
2013-08-05 15:39:15	14.5	16.92		5.02469	-14.7808	-17.2477
2013-08-05 15:49:15	14.52	16.93		5.03164	-14.8012	-17.2579
2013-08-05 15:59:15	14.54	16.94		5.03858	-14.8216	-17.2681
2013-08-05 16:09:15	14.56	16.96		5.04552	-14.842	-17.2885
2013-08-05 16:19:15	14.58	16.96		5.05247	-14.8624	-17.2885	2013-08-05 16:19:15
2013-08-05 16:29:15	14.58	16.99		5.05941	-14.8624	-17.3191
2013-08-05 16:39:15	14.62	17		5.06636	-14.9032	-17.3293
2013-08-05 16:49:15	14.63	17.03		5.0733	-14.9134	-17.3598
2013-08-05 16:59:15	14.64	17.03		5.08025	-14.9235	-17.3598
2013-08-05 17:09:15	14.65	17.06		5.08719	-14.9337	-17.3904
2013-08-05 17:19:15	14.68	17.06		5.09414	-14.9643	-17.3904	2013-08-05 17:19:15
2013-08-05 17:29:15	14.67	17.08		5.10108	-14.9541	-17.4108
2013-08-05 17:39:15	14.68	17.1		5.10802	-14.9643	-17.4312
2013-08-05 17:49:15	14.72	17.09		5.11497	-15.0051	-17.421
2013-08-05 17:59:15	14.74	17.13		5.12191	-15.0255	-17.4618
2013-08-05 18:09:15	14.73	17.14		5.12886	-15.0153	-17.472
2013-08-05 18:19:15	14.76	17.16		5.1358	-15.0459	-17.4924	2013-08-05 18:19:15
2013-08-05 18:29:15	14.78	17.19		5.14275	-15.0663	-17.5229
2013-08-05 18:39:15	14.79	17.2		5.14969	-15.0765	-17.5331
2013-08-05 18:49:15	14.82	17.23		5.15664	-15.107	-17.5637
2013-08-05 18:59:15	14.84	17.24		5.16358	-15.1274	-17.5739
2013-08-05 19:09:15	14.85	17.25		5.17052	-15.1376	-17.5841
2013-08-05 19:19:15	14.86	17.27		5.17747	-15.1478	-17.6045	2013-08-05 19:19:15
2013-08-05 19:29:15	14.91	17.28		5.18441	-15.1988	-17.6147
2013-08-05 19:39:15	14.93	17.3		5.19136	-15.2192	-17.6351
2013-08-05 19:49:15	14.93	17.33		5.1983	-15.2192	-17.6656
2013-08-05 19:59:15	14.95	17.35		5.20525	-15.2396	-17.686
2013-08-05 20:09:15	14.96	17.36		5.21219	-15.2497	-17.6962
2013-08-05 20:19:15	14.99	17.38		5.21914	-15.2803	-17.7166	2013-08-05 20:19:15
2013-08-05 20:29:15	15.03	17.39		5.22608	-15.3211	-17.7268
2013-08-05 20:39:15	15.02	17.42		5.23302	-15.3109	-17.7574
2013-08-05 20:49:15	14.86	17.28		5.23997	-15.1478	-17.6147
2013-08-05 20:59:15	14.99	17.37		5.24691	-15.2803	-17.7064
2013-08-05 21:09:15	15	17.41		5.25386	-15.2905	-17.7472
2013-08-05 21:19:15	15.04	17.41		5.2608	-15.3313	-17.7472	2013-08-05 21:19:15
2013-08-05 21:29:15	15.04	17.45		5.26775	-15.3313	-17.788
2013-08-05 21:39:15	15.05	17.46		5.27469	-15.3415	-17.7982
2013-08-05 21:49:15	15.09	17.47		5.28164	-15.3823	-17.8084
2013-08-05 21:59:15	15.09	17.5		5.28858	-15.3823	-17.8389
2013-08-05 22:09:15	15.11	17.5		5.29552	-15.4027	-17.8389
2013-08-05 22:19:15	15.12	17.52		5.30247	-15.4128	-17.8593	2013-08-05 22:19:15
2013-08-05 22:29:15	15.13	17.53		5.30941	-15.423	-17.8695
2013-08-05 22:39:15	15.16	17.55		5.31636	-15.4536	-17.8899
2013-08-05 22:49:15	15.17	17.57		5.3233	-15.4638	-17.9103
2013-08-05 22:59:15	15.19	17.59		5.33025	-15.4842	-17.9307
2013-08-05 23:09:15	15.21	17.6		5.33719	-15.5046	-17.9409
2013-08-05 23:19:15	15.22	17.61		5.34414	-15.5148	-17.9511	2013-08-05 23:19:15
2013-08-05 23:29:15	15.22	17.62		5.35108	-15.5148	-17.9613
2013-08-05 23:39:15	15.24	17.64		5.35802	-15.5352	-17.9817
2013-08-05 23:49:15	15.26	17.66		5.36497	-15.5556	-18.002
2013-08-05 23:59:15	15.26	17.66		5.37191	-15.5556	-18.002
2013-08-06 00:09:15	15.28	17.67		5.37886	-15.5759	-18.0122
2013-08-06 00:19:15	15.28	17.69		5.3858	-15.5759	-18.0326	2013-08-06 00:19:15
2013-08-06 00:29:15	15.31	17.71		5.39275	-15.6065	-18.053
2013-08-06 00:39:15	15.31	17.71		5.39969	-15.6065	-18.053
2013-08-06 00:49:15	15.34	17.73		5.40664	-15.6371	-18.0734
2013-08-06 00:59:15	15.35	17.75		5.41358	-15.6473	-18.0938
2013-08-06 01:09:15	15.35	17.74		5.42052	-15.6473	-18.0836
2013-08-06 01:19:15	15.37	17.76		5.42747	-15.6677	-18.104	2013-08-06 01:19:15
2013-08-06 01:29:15	15.37	17.77		5.43441	-15.6677	-18.1142
2013-08-06 01:39:15	15.39	17.78		5.44136	-15.6881	-18.1244
2013-08-06 01:49:15	15.35	17.74		5.4483	-15.6473	-18.0836
2013-08-06 01:59:15	15.42	17.79		5.45525	-15.7187	-18.1346
2013-08-06 02:09:15	15.43	17.8		5.46219	-15.7288	-18.1448
2013-08-06 02:19:15	15.43	17.82		5.46914	-15.7288	-18.1651	2013-08-06 02:19:15
2013-08-06 02:29:15	15.44	17.83		5.47608	-15.739	-18.1753
2013-08-06 02:39:15	15.45	17.84		5.48302	-15.7492	-18.1855
2013-08-06 02:49:15	15.46	17.86		5.48997	-15.7594	-18.2059
2013-08-06 02:59:15	15.48	17.86		5.49691	-15.7798	-18.2059
2013-08-06 03:09:15	15.5	17.86		5.50386	-15.8002	-18.2059
2013-08-06 03:19:15	15.49	17.89		5.5108	-15.79	-18.2365	2013-08-06 03:19:15
2013-08-06 03:29:15	15.5	17.89		5.51775	-15.8002	-18.2365
2013-08-06 03:39:15	15.52	17.91		5.52469	-15.8206	-18.2569
2013-08-06 03:49:15	15.53	17.92		5.53164	-15.8308	-18.2671
2013-08-06 03:59:15	15.57	17.93		5.53858	-15.8716	-18.2773
2013-08-06 04:09:15	15.55	17.95		5.54552	-15.8512	-18.2977
2013-08-06 04:19:15	15.57	17.95		5.55247	-15.8716	-18.2977	2013-08-06 04:19:15
2013-08-06 04:29:15	15.59	17.96		5.55941	-15.8919	-18.3078
2013-08-06 04:39:15	15.59	17.98		5.56636	-15.8919	-18.3282
2013-08-06 04:49:15	15.6	17.99		5.5733	-15.9021	-18.3384
2013-08-06 04:59:15	15.6	17.99		5.58025	-15.9021	-18.3384
2013-08-06 05:09:15	15.61	18		5.58719	-15.9123	-18.3486
2013-08-06 05:19:15	15.63	18.02		5.59414	-15.9327	-18.369	2013-08-06 05:19:15
2013-08-06 05:29:15	15.66	18.03		5.60108	-15.9633	-18.3792
2013-08-06 05:39:15	15.65	18.04		5.60802	-15.9531	-18.3894
2013-08-06 05:49:15	15.66	18.03		5.61497	-15.9633	-18.3792
2013-08-06 05:59:15	15.67	18.06		5.62191	-15.9735	-18.4098
2013-08-06 06:09:15	15.68	18.06		5.62886	-15.9837	-18.4098
2013-08-06 06:19:15	15.69	18.08		5.6358	-15.9939	-18.4302	2013-08-06 06:19:15
2013-08-06 06:29:15	15.7	18.09		5.64275	-16.0041	-18.4404
2013-08-06 06:39:15	15.71	18.1		5.64969	-16.0143	-18.4506
2013-08-06 06:49:15	15.75	18.11		5.65664	-16.055	-18.4608
2013-08-06 06:59:15	15.45	17.93		5.66358	-15.7492	-18.2773
2013-08-06 07:09:15	15.62	18.05		5.67052	-15.9225	-18.3996
2013-08-06 07:19:15	15.73	18.14		5.67747	-16.0347	-18.4913	2013-08-06 07:19:15
2013-08-06 07:29:15	15.75	18.16		5.68441	-16.055	-18.5117
2013-08-06 07:39:15	15.71	18.15		5.69136	-16.0143	-18.5015
2013-08-06 07:49:15	15.73	18.15		5.6983	-16.0347	-18.5015
2013-08-06 07:59:15	15.77	18.14		5.70525	-16.0754	-18.4913
2013-08-06 08:09:15	15.76	18.16		5.71219	-16.0652	-18.5117
2013-08-06 08:19:15	15.76	18.16		5.71914	-16.0652	-18.5117	2013-08-06 08:19:15
2013-08-06 08:29:15	15.76	18.17		5.72608	-16.0652	-18.5219
2013-08-06 08:39:15	15.79	18.16		5.73302	-16.0958	-18.5117
2013-08-06 08:49:15	15.79	18.18		5.73997	-16.0958	-18.5321
2013-08-06 08:59:15	15.79	18.19		5.74691	-16.0958	-18.5423
2013-08-06 09:09:15	15.8	18.19		5.75386	-16.106	-18.5423
2013-08-06 09:19:15	15.81	18.2		5.7608	-16.1162	-18.5525	2013-08-06 09:19:15
2013-08-06 09:29:15	15.81	18.21		5.76775	-16.1162	-18.5627
2013-08-06 09:39:15	15.83	18.23		5.77469	-16.1366	-18.5831
2013-08-06 09:49:15	15.84	18.23		5.78164	-16.1468	-18.5831
2013-08-06 09:59:15	15.86	18.25		5.78858	-16.1672	-18.6035
2013-08-06 10:09:15	15.86	18.25		5.79552	-16.1672	-18.6035
2013-08-06 10:19:15	15.87	18.26		5.80247	-16.1774	-18.6137	2013-08-06 10:19:15
2013-08-06 10:29:15	15.9	18.27		5.80941	-16.208	-18.6239
2013-08-06 10:39:15	15.88	18.28		5.81636	-16.1876	-18.634
2013-08-06 10:49:15	15.91	18.3		5.8233	-16.2181	-18.6544
2013-08-06 10:59:15	15.9	18.3		5.83025	-16.208	-18.6544
2013-08-06 11:09:15	15.93	18.31		5.83719	-16.2385	-18.6646
2013-08-06 11:19:15	15.94	18.33		5.84414	-16.2487	-18.685	2013-08-06 11:19:15
2013-08-06 11:29:15	15.92	18.34		5.85108	-16.2283	-18.6952
2013-08-06 11:39:15	15.94	18.34		5.85802	-16.2487	-18.6952
2013-08-06 11:49:15	15.93	18.33		5.86497	-16.2385	-18.685
2013-08-06 11:59:15	15.95	18.36		5.87191	-16.2589	-18.7156
2013-08-06 12:09:15	15.99	18.35		5.87886	-16.2997	-18.7054
2013-08-06 12:19:15	15.98	18.37		5.8858	-16.2895	-18.7258	2013-08-06 12:19:15
2013-08-06 12:29:15	16.01	18.38		5.89275	-16.3201	-18.736
2013-08-06 12:39:15	16.01	18.4		5.89969	-16.3201	-18.7564
2013-08-06 12:49:15	15.76	18.12		5.90664	-16.0652	-18.4709
2013-08-06 12:59:15	15.82	18.19		5.91358	-16.1264	-18.5423
2013-08-06 13:09:15	15.92	18.28		5.92052	-16.2283	-18.634
2013-08-06 13:19:15	15.96	18.34		5.92747	-16.2691	-18.6952	2013-08-06 13:19:15
2013-08-06 13:29:15	16	18.37		5.93441	-16.3099	-18.7258
2013-08-06 13:39:15	16.04	18.39		5.94136	-16.3507	-18.7462
2013-08-06 13:49:15	16.04	18.41		5.9483	-16.3507	-18.7666
2013-08-06 13:59:15	16.07	18.44		5.95525	-16.3812	-18.7971
2013-08-06 14:09:15	16.11	18.45		5.96219	-16.422	-18.8073
2013-08-06 14:19:15	16.1	18.48		5.96914	-16.4118	-18.8379	2013-08-06 14:19:15
2013-08-06 14:29:15	16.13	18.49		5.97608	-16.4424	-18.8481
2013-08-06 14:39:15	16.13	18.51		5.98302	-16.4424	-18.8685
2013-08-06 14:49:15	16.18	18.52		5.98997	-16.4934	-18.8787
2013-08-06 14:59:15	16.16	18.54		5.99691	-16.473	-18.8991
2013-08-06 15:09:15	16.19	18.56		6.00386	-16.5036	-18.9195
2013-08-06 15:19:15	16.22	18.59		6.0108	-16.5341	-18.9501	2013-08-06 15:19:15
2013-08-06 15:29:15	16.23	18.61		6.01775	-16.5443	-18.9704
2013-08-06 15:39:15	16.26	18.63		6.02469	-16.5749	-18.9908
2013-08-06 15:49:15	16.26	18.64		6.03164	-16.5749	-19.001
2013-08-06 15:59:15	16.28	18.67		6.03858	-16.5953	-19.0316
2013-08-06 16:09:15	16.3	18.67		6.04552	-16.6157	-19.0316
2013-08-06 16:19:15	16.32	18.71		6.05247	-16.6361	-19.0724	2013-08-06 16:19:15
2013-08-06 16:29:15	16.34	18.7		6.05941	-16.6565	-19.0622
2013-08-06 16:39:15	16.36	18.72		6.06636	-16.6769	-19.0826
2013-08-06 16:49:15	16.39	18.75		6.0733	-16.7074	-19.1131
2013-08-06 16:59:15	16.39	18.77		6.08025	-16.7074	-19.1335
2013-08-06 17:09:15	16.42	18.77		6.08719	-16.738	-19.1335
2013-08-06 17:19:15	16.44	18.79		6.09414	-16.7584	-19.1539	2013-08-06 17:19:15
2013-08-06 17:29:15	16.47	18.82		6.10108	-16.789	-19.1845
2013-08-06 17:39:15	16.45	18.84		6.10802	-16.7686	-19.2049
2013-08-06 17:49:15	16.48	18.86		6.11497	-16.7992	-19.2253
2013-08-06 17:59:15	16.5	18.88		6.12191	-16.8196	-19.2457
2013-08-06 18:09:15	16.51	18.91		6.12886	-16.8298	-19.2762
2013-08-06 18:19:15	15.81	18.23		6.1358	-16.1162	-18.5831	2013-08-06 18:19:15
2013-08-06 18:29:15	15.91	18.34		6.14275	-16.2181	-18.6952
2013-08-06 18:39:15	16.03	18.44		6.14969	-16.3405	-18.7971
2013-08-06 18:49:15	16.12	18.55		6.15664	-16.4322	-18.9093
2013-08-06 18:59:15	16.22	18.64		6.16358	-16.5341	-19.001
2013-08-06 19:09:15	16.33	18.71		6.17052	-16.6463	-19.0724
2013-08-06 19:29:15	16.48	18.87		6.18441	-16.7992	-19.2355	2013-08-06 19:29:15
2013-08-06 19:39:15	16.52	18.91		6.19136	-16.84	-19.2762
2013-08-06 19:49:15	16.52	18.93		6.1983	-16.84	-19.2966
2013-08-06 19:59:15	16.55	18.97		6.20525	-16.8705	-19.3374
2013-08-06 20:09:15	16.57	19		6.21219	-16.8909	-19.368
2013-08-06 20:19:15	16.62	19.01		6.21914	-16.9419	-19.3782
2013-08-06 20:29:15	16.61	19.02		6.22608	-16.9317	-19.3884	2013-08-06 20:29:15
2013-08-06 20:39:15	16.62	19.04		6.23302	-16.9419	-19.4088
2013-08-06 20:49:15	16.65	19.06		6.23997	-16.9725	-19.4292
2013-08-06 20:59:15	16.69	19.08		6.24691	-17.0133	-19.4495
2013-08-06 21:09:15	16.69	19.1		6.25386	-17.0133	-19.4699
2013-08-06 21:19:15	16.71	19.13		6.2608	-17.0336	-19.5005
2013-08-06 21:29:15	16.74	19.14		6.26775	-17.0642	-19.5107	2013-08-06 21:29:15
2013-08-06 21:39:15	16.74	19.16		6.27469	-17.0642	-19.5311
2013-08-06 21:49:15	16.76	19.18		6.28164	-17.0846	-19.5515
2013-08-06 21:59:15	16.79	19.17		6.28858	-17.1152	-19.5413
2013-08-06 22:09:15	16.8	19.2		6.29552	-17.1254	-19.5719
2013-08-06 22:19:15	16.8	19.21		6.30247	-17.1254	-19.5821
2013-08-06 22:29:15	16.81	19.22		6.30941	-17.1356	-19.5923	2013-08-06 22:29:15
2013-08-06 22:39:15	16.84	19.24		6.31636	-17.1662	-19.6126
2013-08-06 22:49:15	16.84	19.26		6.3233	-17.1662	-19.633
2013-08-06 22:59:15	16.86	19.28		6.33025	-17.1865	-19.6534
2013-08-06 23:09:15	16.86	19.28		6.33719	-17.1865	-19.6534
2013-08-06 23:19:15	16.9	19.3		6.34414	-17.2273	-19.6738
2013-08-06 23:29:15	16.9	19.31		6.35108	-17.2273	-19.684	2013-08-06 23:29:15
2013-08-06 23:39:15	16.91	19.33		6.35802	-17.2375	-19.7044
2013-08-06 23:49:15	16.93	19.34		6.36497	-17.2579	-19.7146
2013-08-06 23:59:15	16.94	19.35		6.37191	-17.2681	-19.7248
2013-08-07 00:09:15	16.96	19.37		6.37886	-17.2885	-19.7452
2013-08-07 00:19:15	16.98	19.37		6.3858	-17.3089	-19.7452
2013-08-07 00:29:15	16.99	19.4		6.39275	-17.3191	-19.7757	2013-08-07 00:29:15
2013-08-07 00:39:15	16.99	19.4		6.39969	-17.3191	-19.7757
2013-08-07 00:49:15	17.01	19.43		6.40664	-17.3394	-19.8063
2013-08-07 00:59:15	17.03	19.44		6.41358	-17.3598	-19.8165
2013-08-07 01:09:15	17.04	19.45		6.42052	-17.37	-19.8267
2013-08-07 01:19:15	17.04	19.46		6.42747	-17.37	-19.8369
2013-08-07 01:29:15	17.05	19.47		6.43441	-17.3802	-19.8471	2013-08-07 01:29:15
2013-08-07 01:39:15	17.07	19.48		6.44136	-17.4006	-19.8573
2013-08-07 01:49:15	17.08	19.49		6.4483	-17.4108	-19.8675
2013-08-07 01:59:15	17.09	19.5		6.45525	-17.421	-19.8777
2013-08-07 02:09:15	17.1	19.52		6.46219	-17.4312	-19.8981
2013-08-07 02:19:15	17.13	19.53		6.46914	-17.4618	-19.9083
2013-08-07 02:29:15	17.14	19.55		6.47608	-17.472	-19.9286	2013-08-07 02:29:15
2013-08-07 02:39:15	17.14	19.55		6.48302	-17.472	-19.9286
2013-08-07 02:49:15	17.16	19.57		6.48997	-17.4924	-19.949
2013-08-07 02:59:15	17.17	19.58		6.49691	-17.5025	-19.9592
2013-08-07 03:09:15	17.2	19.58		6.50386	-17.5331	-19.9592
2013-08-07 03:19:15	17.19	19.61		6.5108	-17.5229	-19.9898
2013-08-07 03:29:15	17.21	19.62		6.51775	-17.5433	-20	2013-08-07 03:29:15
2013-08-07 03:39:15	17.23	19.63		6.52469	-17.5637	-20.0102
2013-08-07 03:49:15	17.24	19.65		6.53164	-17.5739	-20.0306
2013-08-07 03:59:15	17.25	19.66		6.53858	-17.5841	-20.0408
2013-08-07 04:09:15	17.26	19.67		6.54552	-17.5943	-20.051
2013-08-07 04:19:15	17.28	19.67		6.55247	-17.6147	-20.051
2013-08-07 04:29:15	17.27	19.69		6.55941	-17.6045	-20.0714	2013-08-07 04:29:15
2013-08-07 04:39:15	17.32	19.7		6.56636	-17.6555	-20.0815
2013-08-07 04:49:15	17.3	19.7		6.5733	-17.6351	-20.0815
2013-08-07 04:59:15	17.32	19.72		6.58025	-17.6555	-20.1019
2013-08-07 05:09:15	17.34	19.74		6.58719	-17.6758	-20.1223
2013-08-07 05:19:15	17.36	19.75		6.59414	-17.6962	-20.1325
2013-08-07 05:29:15	17.37	19.76		6.60108	-17.7064	-20.1427	2013-08-07 05:29:15
2013-08-07 05:39:15	17.39	19.77		6.60802	-17.7268	-20.1529
2013-08-07 05:49:15	17.38	19.79		6.61497	-17.7166	-20.1733
2013-08-07 05:59:15	17.42	19.81		6.62191	-17.7574	-20.1937
2013-08-07 06:09:15	17.4	19.82		6.62886	-17.737	-20.2039
2013-08-07 06:19:15	17.43	19.82		6.6358	-17.7676	-20.2039
2013-08-07 06:29:15	17.4	19.8		6.64275	-17.737	-20.1835	2013-08-07 06:29:15
2013-08-07 06:39:15	17.39	19.81		6.64969	-17.7268	-20.1937
2013-08-07 06:49:15	17.43	19.81		6.65664	-17.7676	-20.1937
2013-08-07 06:59:15	17.43	19.82		6.66358	-17.7676	-20.2039
2013-08-07 07:09:15	17.43	19.84		6.67052	-17.7676	-20.2243
2013-08-07 07:19:15	17.44	19.85		6.67747	-17.7778	-20.2345
2013-08-07 07:29:15	17.46	19.86		6.68441	-17.7982	-20.2446	2013-08-07 07:29:15
2013-08-07 07:39:15	17.46	19.88		6.69136	-17.7982	-20.265
2013-08-07 07:49:15	17.47	19.89		6.6983	-17.8084	-20.2752
2013-08-07 07:59:15	17.49	19.91		6.70525	-17.8287	-20.2956
2013-08-07 08:09:15	17.31	19.68		6.71219	-17.6453	-20.0612
2013-08-07 08:19:15	17.37	19.78		6.71914	-17.7064	-20.1631
2013-08-07 08:29:15	17.45	19.85		6.72608	-17.788	-20.2345	2013-08-07 08:29:15
2013-08-07 08:39:15	17.52	19.92		6.73302	-17.8593	-20.3058
2013-08-07 08:49:15	17.55	19.94		6.73997	-17.8899	-20.3262
2013-08-07 08:59:15	17.57	19.97		6.74691	-17.9103	-20.3568
2013-08-07 09:09:15	17.59	19.99		6.75386	-17.9307	-20.3772
2013-08-07 09:19:15	17.6	20		6.7608	-17.9409	-20.3874
2013-08-07 09:29:15	17.62	20.02		6.76775	-17.9613	-20.4077	2013-08-07 09:29:15
2013-08-07 09:39:15	17.65	20.03		6.77469	-17.9918	-20.4179
2013-08-07 09:49:15	17.63	20.04		6.78164	-17.9715	-20.4281
2013-08-07 09:59:15	17.67	20.06		6.78858	-18.0122	-20.4485
2013-08-07 10:09:15	17.68	20.06		6.79552	-18.0224	-20.4485
2013-08-07 10:19:15	17.69	20.08		6.80247	-18.0326	-20.4689
2013-08-07 10:29:15	17.72	20.09		6.80941	-18.0632	-20.4791	2013-08-07 10:29:15
2013-08-07 10:39:15	17.72	20.11		6.81636	-18.0632	-20.4995
2013-08-07 10:49:15	17.73	20.12		6.8233	-18.0734	-20.5097
2013-08-07 10:59:15	17.74	20.15		6.83025	-18.0836	-20.5403
2013-08-07 11:09:15	17.76	20.15		6.83719	-18.104	-20.5403
2013-08-07 11:19:15	17.77	20.16		6.84414	-18.1142	-20.5505
2013-08-07 11:29:15	17.79	20.18		6.85108	-18.1346	-20.5708	2013-08-07 11:29:15
2013-08-07 11:39:15	17.79	20.2		6.85802	-18.1346	-20.5912
2013-08-07 11:49:15	17.81	20.21		6.86497	-18.1549	-20.6014
2013-08-07 11:59:15	17.83	20.22		6.87191	-18.1753	-20.6116
2013-08-07 12:09:15	17.82	20.22		6.87886	-18.1651	-20.6116
2013-08-07 12:19:15	17.85	20.24		6.8858	-18.1957	-20.632
2013-08-07 12:29:15	17.85	20.25		6.89275	-18.1957	-20.6422	2013-08-07 12:29:15
2013-08-07 12:39:15	17.87	20.27		6.89969	-18.2161	-20.6626
2013-08-07 12:49:15	17.87	20.27		6.90664	-18.2161	-20.6626
2013-08-07 12:59:15	17.9	20.3		6.91358	-18.2467	-20.6932
2013-08-07 13:09:15	17.94	20.31		6.92052	-18.2875	-20.7034
2013-08-07 13:19:15	17.82	20.21		6.92747	-18.1651	-20.6014
2013-08-07 13:29:15	17.87	20.28		6.93441	-18.2161	-20.6728	2013-08-07 13:29:15
2013-08-07 13:39:15	17.92	20.31		6.94136	-18.2671	-20.7034
2013-08-07 13:49:15	17.91	20.31		6.9483	-18.2569	-20.7034
2013-08-07 13:59:15	17.95	20.34		6.95525	-18.2977	-20.7339
2013-08-07 14:09:15	17.95	20.34		6.96219	-18.2977	-20.7339
2013-08-07 14:19:15	17.97	20.35		6.96914	-18.318	-20.7441
2013-08-07 14:29:15	17.97	20.37		6.97608	-18.318	-20.7645	2013-08-07 14:29:15
2013-08-07 14:39:15	17.98	20.38		6.98302	-18.3282	-20.7747
2013-08-07 14:49:15	18	20.38		6.98997	-18.3486	-20.7747
2013-08-07 14:59:15	18.03	20.39		6.99691	-18.3792	-20.7849
2013-08-07 15:09:15	18.04	20.4		7.00386	-18.3894	-20.7951
2013-08-07 15:19:15	18.03	20.43		7.0108	-18.3792	-20.8257
2013-08-07 15:29:15	18.06	20.44		7.01775	-18.4098	-20.8359	2013-08-07 15:29:15
2013-08-07 15:39:15	18.07	20.46		7.02469	-18.42	-20.8563
2013-08-07 15:49:15	18.07	20.46		7.03164	-18.42	-20.8563
2013-08-07 15:59:15	18.11	20.48		7.03858	-18.4608	-20.8767
2013-08-07 16:09:15	18.12	20.48		7.04552	-18.4709	-20.8767
2013-08-07 16:19:15	18.15	20.53		7.05247	-18.5015	-20.9276
2013-08-07 16:29:15	18.15	20.53		7.05941	-18.5015	-20.9276	2013-08-07 16:29:15
2013-08-07 16:39:15	18.15	20.53		7.06636	-18.5015	-20.9276
2013-08-07 16:49:15	18.19	20.54		7.0733	-18.5423	-20.9378
2013-08-07 16:59:15	18.18	20.55		7.08025	-18.5321	-20.948
2013-08-07 17:09:15	18.22	20.56		7.08719	-18.5729	-20.9582
2013-08-07 17:19:15	18.2	20.58		7.09414	-18.5525	-20.9786
2013-08-07 17:29:15	18.22	20.59		7.10108	-18.5729	-20.9888	2013-08-07 17:29:15
2013-08-07 17:39:15	18.22	20.6		7.10802	-18.5729	-20.999
2013-08-07 17:49:15	18.25	20.61		7.11497	-18.6035	-21.0092
2013-08-07 17:59:15	18.25	20.63		7.12191	-18.6035	-21.0296
2013-08-07 18:09:15	18.26	20.64		7.12886	-18.6137	-21.0398
2013-08-07 18:19:15	18.29	20.63		7.1358	-18.6442	-21.0296
2013-08-07 18:29:15	18.29	20.66		7.14275	-18.6442	-21.0601	2013-08-07 18:29:15
2013-08-07 18:39:15	18.31	20.68		7.14969	-18.6646	-21.0805
2013-08-07 18:49:15	18.3	20.67		7.15664	-18.6544	-21.0703
2013-08-07 18:59:15	18.37	20.7		7.16358	-18.7258	-21.1009
2013-08-07 19:09:15	18.1	20.55		7.17052	-18.4506	-20.948
2013-08-07 19:19:15	18.31	20.68		7.17747	-18.6646	-21.0805
2013-08-07 19:29:15	18.38	20.75		7.18441	-18.736	-21.1519	2013-08-07 19:29:15
2013-08-07 19:39:15	18.39	20.78		7.19136	-18.7462	-21.1825
2013-08-07 19:49:15	18.36	20.77		7.1983	-18.7156	-21.1723
2013-08-07 19:59:15	18.38	20.78		7.20525	-18.736	-21.1825
2013-08-07 20:09:15	18.4	20.78		7.21219	-18.7564	-21.1825
2013-08-07 20:19:15	18.4	20.78		7.21914	-18.7564	-21.1825
2013-08-07 20:29:15	18.42	20.78		7.22608	-18.7768	-21.1825	2013-08-07 20:29:15
2013-08-07 20:39:15	18.44	20.79		7.23302	-18.7971	-21.1927
2013-08-07 20:49:15	18.43	20.81		7.23997	-18.787	-21.213
2013-08-07 20:59:15	18.46	20.8		7.24691	-18.8175	-21.2029
2013-08-07 21:09:15	18.46	20.84		7.25386	-18.8175	-21.2436
2013-08-07 21:19:15	18.49	20.83		7.2608	-18.8481	-21.2334
2013-08-07 21:29:15	18.47	20.85		7.26775	-18.8277	-21.2538	2013-08-07 21:29:15
2013-08-07 21:39:15	18.5	20.86		7.27469	-18.8583	-21.264
2013-08-07 21:49:15	18.51	20.87		7.28164	-18.8685	-21.2742
2013-08-07 21:59:15	18.51	20.89		7.28858	-18.8685	-21.2946
2013-08-07 22:09:15	18.53	20.9		7.29552	-18.8889	-21.3048
2013-08-07 22:19:15	18.53	20.91		7.30247	-18.8889	-21.315
2013-08-07 22:29:15	18.56	20.93		7.30941	-18.9195	-21.3354	2013-08-07 22:29:15
2013-08-07 22:39:15	18.57	20.93		7.31636	-18.9297	-21.3354
2013-08-07 22:59:15	18.59	20.96		7.33025	-18.9501	-21.366
2013-08-07 23:09:15	18.61	20.95		7.33719	-18.9704	-21.3558
2013-08-07 23:19:15	18.6	20.97		7.34414	-18.9602	-21.3761
2013-08-07 23:29:15	18.62	20.99		7.35108	-18.9806	-21.3965
2013-08-07 23:39:15	18.65	20.99		7.35802	-19.0112	-21.3965	2013-08-07 23:39:15
2013-08-07 23:49:15	18.6	20.97		7.36497	-18.9602	-21.3761
2013-08-07 23:59:15	18.61	20.98		7.37191	-18.9704	-21.3863
2013-08-08 00:09:15	18.61	20.99		7.37886	-18.9704	-21.3965
2013-08-08 00:19:15	18.63	21		7.3858	-18.9908	-21.4067
2013-08-08 00:29:15	18.64	21.01		7.39275	-19.001	-21.4169
2013-08-08 00:39:15	18.64	21.02		7.39969	-19.001	-21.4271	2013-08-08 00:39:15
2013-08-08 00:49:15	18.67	21.03		7.40664	-19.0316	-21.4373
2013-08-08 00:59:15	18.7	21.04		7.41358	-19.0622	-21.4475
2013-08-08 01:09:15	18.68	21.05		7.42052	-19.0418	-21.4577
2013-08-08 01:19:15	18.71	21.07		7.42747	-19.0724	-21.4781
2013-08-08 01:29:15	18.7	21.08		7.43441	-19.0622	-21.4883
2013-08-08 01:39:15	18.72	21.1		7.44136	-19.0826	-21.5087	2013-08-08 01:39:15
2013-08-08 01:49:15	18.75	21.11		7.4483	-19.1131	-21.5189
2013-08-08 01:59:15	18.74	21.12		7.45525	-19.103	-21.5291
2013-08-08 02:09:15	18.76	21.13		7.46219	-19.1233	-21.5392
2013-08-08 02:19:15	18.77	21.14		7.46914	-19.1335	-21.5494
2013-08-08 02:29:15	18.8	21.15		7.47608	-19.1641	-21.5596
2013-08-08 02:39:15	18.78	21.16		7.48302	-19.1437	-21.5698	2013-08-08 02:39:15
2013-08-08 02:49:15	18.8	21.17		7.48997	-19.1641	-21.58
2013-08-08 02:59:15	18.8	21.18		7.49691	-19.1641	-21.5902
2013-08-08 03:09:15	18.82	21.2		7.50386	-19.1845	-21.6106
2013-08-08 03:19:15	18.82	21.2		7.5108	-19.1845	-21.6106
2013-08-08 03:29:15	18.84	21.21		7.51775	-19.2049	-21.6208
2013-08-08 03:39:15	18.86	21.23		7.52469	-19.2253	-21.6412	2013-08-08 03:39:15
2013-08-08 03:49:15	18.87	21.21		7.53164	-19.2355	-21.6208
2013-08-08 03:59:15	18.86	21.23		7.53858	-19.2253	-21.6412
2013-08-08 04:09:15	18.91	21.25		7.54552	-19.2762	-21.6616
2013-08-08 04:19:15	18.9	21.26		7.55247	-19.2661	-21.6718
2013-08-08 04:29:15	18.9	21.27		7.55941	-19.2661	-21.682
2013-08-08 04:39:15	18.93	21.28		7.56636	-19.2966	-21.6922	2013-08-08 04:39:15
2013-08-08 04:49:15	18.93	21.29		7.5733	-19.2966	-21.7023
2013-08-08 04:59:15	18.93	21.31		7.58025	-19.2966	-21.7227
2013-08-08 05:09:15	18.95	21.31		7.58719	-19.317	-21.7227
2013-08-08 05:19:15	18.97	21.32		7.59414	-19.3374	-21.7329
2013-08-08 05:29:15	18.99	21.33		7.60108	-19.3578	-21.7431
2013-08-08 05:39:15	18.98	21.35		7.60802	-19.3476	-21.7635	2013-08-08 05:39:15
2013-08-08 05:49:15	19.01	21.35		7.61497	-19.3782	-21.7635
2013-08-08 05:59:15	19.02	21.36		7.62191	-19.3884	-21.7737
2013-08-08 06:09:15	19.01	21.39		7.62886	-19.3782	-21.8043
2013-08-08 06:19:15	19.02	21.39		7.6358	-19.3884	-21.8043
2013-08-08 06:29:15	19.04	21.39		7.64275	-19.4088	-21.8043
2013-08-08 06:39:15	19.05	21.41		7.64969	-19.419	-21.8247	2013-08-08 06:39:15
2013-08-08 06:49:15	19.04	21.42		7.65664	-19.4088	-21.8349
2013-08-08 06:59:15	19.07	21.43		7.66358	-19.4393	-21.8451
2013-08-08 07:09:15	19.09	21.44		7.67052	-19.4597	-21.8552
2013-08-08 07:19:15	19.08	21.45		7.67747	-19.4495	-21.8654
2013-08-08 07:29:15	19.1	21.46		7.68441	-19.4699	-21.8756
2013-08-08 07:39:15	19.11	21.48		7.69136	-19.4801	-21.896	2013-08-08 07:39:15
2013-08-08 07:49:15	19.12	21.49		7.6983	-19.4903	-21.9062
2013-08-08 07:59:15	19.12	21.5		7.70525	-19.4903	-21.9164
2013-08-08 08:09:15	19.16	21.52		7.71219	-19.5311	-21.9368
2013-08-08 08:19:15	19.14	21.51		7.71914	-19.5107	-21.9266
2013-08-08 08:29:15	18.87	21.25		7.72608	-19.2355	-21.6616
2013-08-08 08:39:15	18.97	21.34		7.73302	-19.3374	-21.7533	2013-08-08 08:39:15
2013-08-08 08:49:15	19.08	21.42		7.73997	-19.4495	-21.8349
2013-08-08 08:59:15	19.14	21.5		7.74691	-19.5107	-21.9164
2013-08-08 09:09:15	19.18	21.53		7.75386	-19.5515	-21.947
2013-08-08 09:19:15	19.2	21.57		7.7608	-19.5719	-21.9878
2013-08-08 09:29:15	19.22	21.58		7.76775	-19.5923	-21.998
2013-08-08 09:39:15	19.24	21.59		7.77469	-19.6126	-22.0082	2013-08-08 09:39:15
2013-08-08 09:49:15	19.26	21.61		7.78164	-19.633	-22.0285
2013-08-08 09:59:15	19.21	21.57		7.78858	-19.5821	-21.9878
2013-08-08 10:09:15	19.24	21.59		7.79552	-19.6126	-22.0082
2013-08-08 10:19:15	19.26	21.6		7.80247	-19.633	-22.0183
2013-08-08 10:29:15	19.26	21.61		7.80941	-19.633	-22.0285
2013-08-08 10:39:15	19.28	21.64		7.81636	-19.6534	-22.0591	2013-08-08 10:39:15
2013-08-08 10:49:15	19.3	21.65		7.8233	-19.6738	-22.0693
2013-08-08 10:59:15	19.32	21.64		7.83025	-19.6942	-22.0591
2013-08-08 11:09:15	19.31	21.68		7.83719	-19.684	-22.0999
2013-08-08 11:19:15	19.32	21.69		7.84414	-19.6942	-22.1101
2013-08-08 11:29:15	18.96	21.66		7.85108	-19.3272	-22.0795
2013-08-08 11:39:15	19.34	21.71		7.85802	-19.7146	-22.1305	2013-08-08 11:39:15
2013-08-08 11:49:15	19.37	21.72		7.86497	-19.7452	-22.1407
2013-08-08 11:59:15	19.38	21.74		7.87191	-19.7554	-22.1611
2013-08-08 12:09:15	19.38	21.74		7.87886	-19.7554	-22.1611
2013-08-08 12:19:15	19.41	21.77		7.8858	-19.7859	-22.1916
2013-08-08 12:29:15	19.42	21.79		7.89275	-19.7961	-22.212
2013-08-08 12:39:15	19.44	21.79		7.89969	-19.8165	-22.212	2013-08-08 12:39:15
2013-08-08 12:49:15	19.44	21.81		7.90664	-19.8165	-22.2324
2013-08-08 12:59:15	19.48	21.83		7.91358	-19.8573	-22.2528
2013-08-08 13:09:15	19.49	21.84		7.92052	-19.8675	-22.263
2013-08-08 13:19:15	19.5	21.86		7.92747	-19.8777	-22.2834
2013-08-08 13:29:15	19.52	21.87		7.93441	-19.8981	-22.2936
2013-08-08 13:39:15	19.53	21.88		7.94136	-19.9083	-22.3038	2013-08-08 13:39:15
2013-08-08 13:49:15	19.55	21.9		7.9483	-19.9286	-22.3242
2013-08-08 13:59:15	19.57	21.92		7.95525	-19.949	-22.3445
2013-08-08 14:09:15	19.58	21.93		7.96219	-19.9592	-22.3547
2013-08-08 14:19:15	19.6	21.95		7.96914	-19.9796	-22.3751
2013-08-08 14:29:15	19.61	21.97		7.97608	-19.9898	-22.3955
2013-08-08 14:39:15	19.63	21.98		7.98302	-20.0102	-22.4057	2013-08-08 14:39:15
2013-08-08 14:49:15	19.63	21.99		7.98997	-20.0102	-22.4159
2013-08-08 14:59:15	19.64	22		7.99691	-20.0204	-22.4261
2013-08-08 15:09:15	19.67	22.02		8.00386	-20.051	-22.4465
2013-08-08 15:19:15	19.67	22.03		8.0108	-20.051	-22.4567
2013-08-08 15:29:15	19.68	22.04		8.01775	-20.0612	-22.4669
2013-08-08 15:39:15	19.71	22.07		8.02469	-20.0917	-22.4975	2013-08-08 15:39:15
2013-08-08 15:49:15	19.72	22.07		8.03164	-20.1019	-22.4975
2013-08-08 15:59:15	19.72	22.08		8.03858	-20.1019	-22.5076
2013-08-08 16:09:15	19.74	22.1		8.04552	-20.1223	-22.528
2013-08-08 16:19:15	19.77	22.11		8.05247	-20.1529	-22.5382
2013-08-08 16:29:15	19.8	22.11		8.05941	-20.1835	-22.5382
2013-08-08 16:39:15	19.79	22.14		8.06636	-20.1733	-22.5688	2013-08-08 16:39:15
2013-08-08 16:49:15	19.81	22.16		8.0733	-20.1937	-22.5892
2013-08-08 16:59:15	19.82	22.17		8.08025	-20.2039	-22.5994
2013-08-08 17:09:15	19.83	22.18		8.08719	-20.2141	-22.6096
2013-08-08 17:19:15	19.83	22.19		8.09414	-20.2141	-22.6198
2013-08-08 17:29:15	19.86	22.22		8.10108	-20.2446	-22.6504
2013-08-08 17:39:15	19.88	22.22		8.10802	-20.265	-22.6504	2013-08-08 17:39:15
2013-08-08 17:49:15	19.89	22.24		8.11497	-20.2752	-22.6707
2013-08-08 17:59:15	19.9	22.26		8.12191	-20.2854	-22.6911
2013-08-08 18:09:15	19.93	22.28		8.12886	-20.316	-22.7115
2013-08-08 18:19:15	19.93	22.29		8.1358	-20.316	-22.7217
2013-08-08 18:29:15	19.94	22.31		8.14275	-20.3262	-22.7421
2013-08-08 18:39:15	19.97	22.32		8.14969	-20.3568	-22.7523	2013-08-08 18:39:15
2013-08-08 18:49:15	19.97	22.32		8.15664	-20.3568	-22.7523
2013-08-08 18:59:15	20.01	22.34		8.16358	-20.3976	-22.7727
2013-08-08 19:09:15	20	22.36		8.17052	-20.3874	-22.7931
2013-08-08 19:19:15	19.99	22.38		8.17747	-20.3772	-22.8135
2013-08-08 19:29:15	20.05	22.39		8.18441	-20.4383	-22.8236
2013-08-08 19:39:15	20.08	22.39		8.19136	-20.4689	-22.8236	2013-08-08 19:39:15
2013-08-08 19:49:15	19.82	22.29		8.1983	-20.2039	-22.7217
2013-08-08 19:59:15	20.01	22.38		8.20525	-20.3976	-22.8135
2013-08-08 20:09:15	20.08	22.45		8.21219	-20.4689	-22.8848
2013-08-08 20:19:15	20.11	22.49		8.21914	-20.4995	-22.9256
2013-08-08 20:29:15	20.12	22.51		8.22608	-20.5097	-22.946
2013-08-08 20:39:15	20.16	22.52		8.23302	-20.5505	-22.9562	2013-08-08 20:39:15
2013-08-08 20:49:15	20.16	22.53		8.23997	-20.5505	-22.9664
2013-08-08 20:59:15	20.17	22.55		8.24691	-20.5607	-22.9867
2013-08-08 21:09:15	20.2	22.57		8.25386	-20.5912	-23.0071
2013-08-08 21:19:15	20.23	22.59		8.2608	-20.6218	-23.0275
2013-08-08 21:29:15	20.24	22.61		8.26775	-20.632	-23.0479
2013-08-08 21:39:15	20.27	22.61		8.27469	-20.6626	-23.0479	2013-08-08 21:39:15
2013-08-08 21:49:15	20.3	22.64		8.28164	-20.6932	-23.0785
2013-08-08 21:59:15	20.32	22.64		8.28858	-20.7136	-23.0785
2013-08-08 22:09:15	20.3	22.66		8.29552	-20.6932	-23.0989
2013-08-08 22:19:15	20.31	22.68		8.30247	-20.7034	-23.1193
2013-08-08 22:29:15	20.33	22.7		8.30941	-20.7238	-23.1397
2013-08-08 22:39:15	20.38	22.72		8.31636	-20.7747	-23.16	2013-08-08 22:39:15
2013-08-08 22:49:15	20.4	22.73		8.3233	-20.7951	-23.1702
2013-08-08 22:59:15	20.39	22.76		8.33025	-20.7849	-23.2008
2013-08-08 23:09:15	20.4	22.77		8.33719	-20.7951	-23.211
2013-08-08 23:19:15	20.41	22.78		8.34414	-20.8053	-23.2212
2013-08-08 23:29:15	20.43	22.8		8.35108	-20.8257	-23.2416
2013-08-08 23:39:15	20.47	22.81		8.35802	-20.8665	-23.2518	2013-08-08 23:39:15
2013-08-08 23:49:15	20.47	22.84		8.36497	-20.8665	-23.2824
2013-08-08 23:59:15	20.48	22.85		8.37191	-20.8767	-23.2926
2013-08-09 00:09:15	20.49	22.86		8.37886	-20.8869	-23.3028
2013-08-09 00:19:15	20.5	22.87		8.3858	-20.897	-23.3129
2013-08-09 00:29:15	20.51	22.9		8.39275	-20.9072	-23.3435
2013-08-09 00:39:15	20.55	22.91		8.39969	-20.948	-23.3537	2013-08-09 00:39:15
2013-08-09 00:49:15	20.57	22.91		8.40664	-20.9684	-23.3537
2013-08-09 00:59:15	20.59	22.95		8.41358	-20.9888	-23.3945
2013-08-09 01:09:15	20.61	22.96		8.42052	-21.0092	-23.4047
2013-08-09 01:19:15	20.62	22.99		8.42747	-21.0194	-23.4353
2013-08-09 01:29:15	20.63	23		8.43441	-21.0296	-23.4455
2013-08-09 01:39:15	20.64	23.02		8.44136	-21.0398	-23.4659	2013-08-09 01:39:15
2013-08-09 01:49:15	20.67	23.03		8.4483	-21.0703	-23.476
2013-08-09 01:59:15	20.67	23.04		8.45525	-21.0703	-23.4862
2013-08-09 02:09:15	20.7	23.06		8.46219	-21.1009	-23.5066
2013-08-09 02:19:15	20.71	23.08		8.46914	-21.1111	-23.527
2013-08-09 02:29:15	20.72	23.09		8.47608	-21.1213	-23.5372
2013-08-09 02:39:15	20.73	23.11		8.48302	-21.1315	-23.5576	2013-08-09 02:39:15
2013-08-09 02:49:15	20.76	23.13		8.48997	-21.1621	-23.578
2013-08-09 02:59:15	20.77	23.14		8.49691	-21.1723	-23.5882
2013-08-09 03:09:15	20.78	23.15		8.50386	-21.1825	-23.5984
2013-08-09 03:19:15	20.8	23.17		8.5108	-21.2029	-23.6188
2013-08-09 03:29:15	20.84	23.18		8.51775	-21.2436	-23.629
2013-08-09 03:39:15	20.84	23.2		8.52469	-21.2436	-23.6493	2013-08-09 03:39:15
2013-08-09 03:49:15	20.86	23.23		8.53164	-21.264	-23.6799
2013-08-09 03:59:15	20.87	23.23		8.53858	-21.2742	-23.6799
2013-08-09 04:09:15	20.91	23.24		8.54552	-21.315	-23.6901
2013-08-09 04:19:15	20.9	23.27		8.55247	-21.3048	-23.7207
2013-08-09 04:29:15	20.92	23.29		8.55941	-21.3252	-23.7411
2013-08-09 04:39:15	20.94	23.31		8.56636	-21.3456	-23.7615	2013-08-09 04:39:15
2013-08-09 04:49:15	20.97	23.32		8.5733	-21.3761	-23.7717
2013-08-09 04:59:15	20.98	23.34		8.58025	-21.3863	-23.792
2013-08-09 05:09:15	21.01	23.36		8.58719	-21.4169	-23.8124
2013-08-09 05:19:15	21.02	23.39		8.59414	-21.4271	-23.843
2013-08-09 05:29:15	21.05	23.41		8.60108	-21.4577	-23.8634
2013-08-09 05:39:15	21.06	23.43		8.60802	-21.4679	-23.8838	2013-08-09 05:39:15
2013-08-09 05:49:15	21.08	23.44		8.61497	-21.4883	-23.894
2013-08-09 05:59:15	21.11	23.46		8.62191	-21.5189	-23.9144
2013-08-09 06:09:15	21.12	23.48		8.62886	-21.5291	-23.9348
2013-08-09 06:19:15	21.14	23.51		8.6358	-21.5494	-23.9653
2013-08-09 06:29:15	21.16	23.52		8.64275	-21.5698	-23.9755
2013-08-09 06:39:15	21.18	23.54		8.64969	-21.5902	-23.9959	2013-08-09 06:39:15
2013-08-09 06:49:15	21.21	23.57		8.65664	-21.6208	-24.0265
2013-08-09 06:59:15	21.22	23.59		8.66358	-21.631	-24.0469
2013-08-09 07:09:15	21.24	23.6		8.67052	-21.6514	-24.0571
2013-08-09 07:19:15	21.26	23.63		8.67747	-21.6718	-24.0877
2013-08-09 07:29:15	21.27	23.64		8.68441	-21.682	-24.0979
2013-08-09 07:39:15	21.28	23.65		8.69136	-21.6922	-24.1081	2013-08-09 07:39:15
2013-08-09 07:49:15	21.3	23.67		8.6983	-21.7125	-24.1284
2013-08-09 07:59:15	21.3	23.67		8.70525	-21.7125	-24.1284
2013-08-09 08:09:15	21.33	23.7		8.71219	-21.7431	-24.159
2013-08-09 08:19:15	21.36	23.72		8.71914	-21.7737	-24.1794
2013-08-09 08:29:15	21.39	23.73		8.72608	-21.8043	-24.1896
2013-08-09 08:39:15	21.41	23.76		8.73302	-21.8247	-24.2202	2013-08-09 08:39:15
2013-08-09 08:49:15	21.41	23.78		8.73997	-21.8247	-24.2406
2013-08-09 08:59:15	21.49	23.79		8.74691	-21.9062	-24.2508
2013-08-09 09:09:15	21.25	23.74		8.75386	-21.6616	-24.1998
2013-08-09 09:19:15	21.44	23.79		8.7608	-21.8552	-24.2508
2013-08-09 09:29:15	21.51	23.89		8.76775	-21.9266	-24.3527
2013-08-09 09:39:15	21.56	23.92		8.77469	-21.9776	-24.3833	2013-08-09 09:39:15
2013-08-09 09:49:15	21.54	23.93		8.78164	-21.9572	-24.3935
2013-08-09 09:59:15	21.58	23.95		8.78858	-21.998	-24.4139
2013-08-09 10:09:15	21.6	23.95		8.79552	-22.0183	-24.4139
2013-08-09 10:19:15	21.61	23.98		8.80247	-22.0285	-24.4444
2013-08-09 10:29:15	21.63	24		8.80941	-22.0489	-24.4648
2013-08-09 10:39:15	21.64	24.01		8.81636	-22.0591	-24.475	2013-08-09 10:39:15
2013-08-09 10:49:15	21.67	24.02		8.8233	-22.0897	-24.4852
2013-08-09 10:59:15	21.68	24.05		8.83025	-22.0999	-24.5158
2013-08-09 11:09:15	21.71	24.06		8.83719	-22.1305	-24.526
2013-08-09 11:19:15	21.72	24.08		8.84414	-22.1407	-24.5464
2013-08-09 11:29:15	21.75	24.11		8.85108	-22.1713	-24.577
2013-08-09 11:39:15	21.77	24.13		8.85802	-22.1916	-24.5973	2013-08-09 11:39:15
2013-08-09 11:49:15	21.8	24.16		8.86497	-22.2222	-24.6279
2013-08-09 11:59:15	21.82	24.18		8.87191	-22.2426	-24.6483
2013-08-09 12:09:15	21.84	24.18		8.87886	-22.263	-24.6483
2013-08-09 12:19:15	21.86	24.22		8.8858	-22.2834	-24.6891
2013-08-09 12:29:15	21.88	24.24		8.89275	-22.3038	-24.7095
2013-08-09 12:39:15	21.91	24.27		8.89969	-22.3344	-24.7401	2013-08-09 12:39:15
2013-08-09 12:49:15	21.92	24.28		8.90664	-22.3445	-24.7503
2013-08-09 12:59:15	21.94	24.3		8.91358	-22.3649	-24.7706
2013-08-09 13:09:15	21.91	24.3		8.92052	-22.3344	-24.7706
2013-08-09 13:19:15	21.98	24.33		8.92747	-22.4057	-24.8012
2013-08-09 13:29:15	21.99	24.34		8.93441	-22.4159	-24.8114
2013-08-09 13:39:15	21.99	24.37		8.94136	-22.4159	-24.842	2013-08-09 13:39:15
2013-08-09 13:49:15	22.02	24.39		8.9483	-22.4465	-24.8624
2013-08-09 13:59:15	22.06	24.43		8.95525	-22.4873	-24.9032
2013-08-09 14:09:15	22.07	24.44		8.96219	-22.4975	-24.9134
2013-08-09 14:19:15	22.09	24.47		8.96914	-22.5178	-24.9439
2013-08-09 14:29:15	22.12	24.49		8.97608	-22.5484	-24.9643
2013-08-09 14:39:15	22.16	24.5		8.98302	-22.5892	-24.9745	2013-08-09 14:39:15
2013-08-09 14:49:15	22.17	24.55		8.98997	-22.5994	-25.0255
2013-08-09 14:59:15	22.2	24.57		8.99691	-22.63	-25.0459
2013-08-09 15:09:15	22.22	24.6		9.00386	-22.6504	-25.0765
2013-08-09 15:19:15	22.25	24.61		9.0108	-22.6809	-25.0866
2013-08-09 15:29:15	22.26	24.64		9.01775	-22.6911	-25.1172
2013-08-09 15:39:15	22.28	24.66		9.02469	-22.7115	-25.1376	2013-08-09 15:39:15
2013-08-09 15:49:15	22.3	24.68		9.03164	-22.7319	-25.158
2013-08-09 15:59:15	22.33	24.7		9.03858	-22.7625	-25.1784
2013-08-09 16:09:15	22.35	24.72		9.04552	-22.7829	-25.1988
2013-08-09 16:19:15	22.37	24.74		9.05247	-22.8033	-25.2192
2013-08-09 16:29:15	22.4	24.78		9.05941	-22.8338	-25.2599
2013-08-09 16:39:15	22.43	24.8		9.06636	-22.8644	-25.2803	2013-08-09 16:39:15
2013-08-09 16:49:15	22.46	24.83		9.0733	-22.895	-25.3109
2013-08-09 16:59:15	22.49	24.84		9.08025	-22.9256	-25.3211
2013-08-09 17:09:15	22.5	24.87		9.08719	-22.9358	-25.3517
2013-08-09 17:19:15	22.56	24.89		9.09414	-22.9969	-25.3721
2013-08-09 17:29:15	22.55	24.92		9.10108	-22.9867	-25.4027
2013-08-09 17:39:15	22.58	24.95		9.10802	-23.0173	-25.4332	2013-08-09 17:39:15
2013-08-09 17:49:15	22.62	24.98		9.11497	-23.0581	-25.4638
2013-08-09 17:59:15	22.64	25.01		9.12191	-23.0785	-25.4944
2013-08-09 18:09:15	22.66	25.03		9.12886	-23.0989	-25.5148
2013-08-09 18:19:15	22.7	25.05		9.1358	-23.1397	-25.5352
2013-08-09 18:29:15	22.53	24.84		9.14275	-22.9664	-25.3211
2013-08-09 18:39:15	22.48	24.86		9.14969	-22.9154	-25.3415	2013-08-09 18:39:15
2013-08-09 18:49:15	22.64	25.01		9.15664	-23.0785	-25.4944
2013-08-09 18:59:15	22.72	25.09		9.16358	-23.16	-25.5759
2013-08-09 19:09:15	22.77	25.14		9.17052	-23.211	-25.6269
2013-08-09 19:19:15	22.82	25.16		9.17747	-23.262	-25.6473
2013-08-09 19:29:15	22.84	25.2		9.18441	-23.2824	-25.6881
2013-08-09 19:39:15	22.86	25.23		9.19136	-23.3028	-25.7187	2013-08-09 19:39:15
2013-08-09 19:49:15	22.88	25.26		9.1983	-23.3231	-25.7492
2013-08-09 19:59:15	22.92	25.29		9.20525	-23.3639	-25.7798
2013-08-09 20:09:15	22.94	25.31		9.21219	-23.3843	-25.8002
2013-08-09 20:19:15	22.93	25.29		9.21914	-23.3741	-25.7798
2013-08-09 20:29:15	22.96	25.33		9.22608	-23.4047	-25.8206
2013-08-09 20:39:15	23	25.35		9.23302	-23.4455	-25.841	2013-08-09 20:39:15
2013-08-09 20:49:15	23.01	25.39		9.23997	-23.4557	-25.8818
2013-08-09 20:59:15	23.04	25.41		9.24691	-23.4862	-25.9021
2013-08-09 21:09:15	23.06	25.45		9.25386	-23.5066	-25.9429
2013-08-09 21:19:15	23.1	25.46		9.2608	-23.5474	-25.9531
2013-08-09 21:29:15	23.11	25.48		9.26775	-23.5576	-25.9735
2013-08-09 21:39:15	23.15	25.51		9.27469	-23.5984	-26.0041	2013-08-09 21:39:15
2013-08-09 21:49:15	23.17	25.54		9.28164	-23.6188	-26.0347
2013-08-09 21:59:15	23.18	25.56		9.28858	-23.629	-26.055
2013-08-09 22:09:15	23.2	25.59		9.29552	-23.6493	-26.0856
2013-08-09 22:19:15	23.24	25.61		9.30247	-23.6901	-26.106
2013-08-09 22:29:15	23.26	25.63		9.30941	-23.7105	-26.1264
2013-08-09 22:39:15	23.27	25.65		9.31636	-23.7207	-26.1468	2013-08-09 22:39:15
2013-08-09 22:49:15	23.3	25.68		9.3233	-23.7513	-26.1774
2013-08-09 22:59:15	23.33	25.7		9.33025	-23.7819	-26.1978
2013-08-09 23:09:15	23.35	25.72		9.33719	-23.8022	-26.2181
2013-08-09 23:19:15	23.37	25.75		9.34414	-23.8226	-26.2487
2013-08-09 23:29:15	23.38	25.77		9.35108	-23.8328	-26.2691
2013-08-09 23:39:15	23.42	25.8		9.35802	-23.8736	-26.2997	2013-08-09 23:39:15
2013-08-09 23:49:15	23.44	25.82		9.36497	-23.894	-26.3201
2013-08-09 23:59:15	23.46	25.84		9.37191	-23.9144	-26.3405
2013-08-10 00:09:15	23.48	25.87		9.37886	-23.9348	-26.371
2013-08-10 00:19:15	23.5	25.89		9.3858	-23.9551	-26.3914
2013-08-10 00:29:15	23.53	25.91		9.39275	-23.9857	-26.4118
2013-08-10 00:39:15	23.55	25.93		9.39969	-24.0061	-26.4322	2013-08-10 00:39:15
2013-08-10 00:49:15	23.59	25.96		9.40664	-24.0469	-26.4628
2013-08-10 00:59:15	23.61	25.99		9.41358	-24.0673	-26.4934
2013-08-10 01:09:15	23.63	26.01		9.42052	-24.0877	-26.5138
2013-08-10 01:19:15	23.65	26.03		9.42747	-24.1081	-26.5341
2013-08-10 01:29:15	23.67	26.05		9.43441	-24.1284	-26.5545
2013-08-10 01:39:15	23.69	26.08		9.44136	-24.1488	-26.5851	2013-08-10 01:39:15
2013-08-10 01:49:15	23.71	26.09		9.4483	-24.1692	-26.5953
2013-08-10 01:59:15	23.73	26.12		9.45525	-24.1896	-26.6259
2013-08-10 02:09:15	23.75	26.14		9.46219	-24.21	-26.6463
2013-08-10 02:19:15	23.78	26.17		9.46914	-24.2406	-26.6769
2013-08-10 02:29:15	23.82	26.2		9.47608	-24.2813	-26.7074
2013-08-10 02:39:15	23.85	26.22		9.48302	-24.3119	-26.7278	2013-08-10 02:39:15
2013-08-10 02:49:15	23.87	26.24		9.48997	-24.3323	-26.7482
2013-08-10 02:59:15	23.9	26.27		9.49691	-24.3629	-26.7788
2013-08-10 03:09:15	23.92	26.3		9.50386	-24.3833	-26.8094
2013-08-10 03:19:15	23.96	26.31		9.5108	-24.4241	-26.8196
2013-08-10 03:29:15	23.97	26.36		9.51775	-24.4343	-26.8705
2013-08-10 03:39:15	24	26.38		9.52469	-24.4648	-26.8909	2013-08-10 03:39:15
2013-08-10 03:49:15	24.02	26.4		9.53164	-24.4852	-26.9113
2013-08-10 03:59:15	24.05	26.43		9.53858	-24.5158	-26.9419
2013-08-10 04:09:15	24.07	26.45		9.54552	-24.5362	-26.9623
2013-08-10 04:19:15	24.12	26.47		9.55247	-24.5872	-26.9827
2013-08-10 04:29:15	24.12	26.51		9.55941	-24.5872	-27.0234
2013-08-10 04:39:15	24.14	26.53		9.56636	-24.6075	-27.0438	2013-08-10 04:39:15
2013-08-10 04:49:15	24.16	26.55		9.5733	-24.6279	-27.0642
2013-08-10 04:59:15	24.17	26.56		9.58025	-24.6381	-27.0744
2013-08-10 05:09:15	24.24	26.58		9.58719	-24.7095	-27.0948
2013-08-10 05:19:15	24.24	26.62		9.59414	-24.7095	-27.1356
2013-08-10 05:29:15	24.26	26.64		9.60108	-24.7299	-27.156
2013-08-10 05:39:15	24.29	26.68		9.60802	-24.7604	-27.1967	2013-08-10 05:39:15
2013-08-10 05:49:15	24.32	26.69		9.61497	-24.791	-27.2069
2013-08-10 05:59:15	24.32	26.71		9.62191	-24.791	-27.2273
2013-08-10 06:09:15	24.35	26.74		9.62886	-24.8216	-27.2579
2013-08-10 06:19:15	24.37	26.76		9.6358	-24.842	-27.2783
2013-08-10 06:29:15	24.4	26.79		9.64275	-24.8726	-27.3089
2013-08-10 06:39:15	24.42	26.82		9.64969	-24.893	-27.3394	2013-08-10 06:39:15
2013-08-10 06:49:15	24.46	26.84		9.65664	-24.9337	-27.3598
2013-08-10 06:59:15	24.48	26.87		9.66358	-24.9541	-27.3904
2013-08-10 07:09:15	24.51	26.9		9.67052	-24.9847	-27.421
2013-08-10 07:19:15	24.54	26.92		9.67747	-25.0153	-27.4414
2013-08-10 07:29:15	24.58	26.95		9.68441	-25.0561	-27.472
2013-08-10 07:39:15	24.59	26.97		9.69136	-25.0663	-27.4924	2013-08-10 07:39:15
2013-08-10 07:49:15	24.63	27.01		9.6983	-25.107	-27.5331
2013-08-10 07:59:15	24.65	27.04		9.70525	-25.1274	-27.5637
2013-08-10 08:09:15	24.69	27.04		9.71219	-25.1682	-27.5637
2013-08-10 08:19:15	24.71	27.09		9.71914	-25.1886	-27.6147
2013-08-10 08:29:15	24.75	27.12		9.72608	-25.2294	-27.6453
2013-08-10 08:39:15	24.77	27.14		9.73302	-25.2497	-27.6656	2013-08-10 08:39:15
2013-08-10 08:49:15	24.8	27.18		9.73997	-25.2803	-27.7064
2013-08-10 08:59:15	24.83	27.21		9.74691	-25.3109	-27.737
2013-08-10 09:09:15	24.86	27.23		9.75386	-25.3415	-27.7574
2013-08-10 09:29:15	24.62	26.99		9.76775	-25.0968	-27.5127
2013-08-10 09:39:15	24.81	27.17		9.77469	-25.2905	-27.6962
2013-08-10 09:49:15	24.92	27.28		9.78164	-25.4027	-27.8084	2013-08-10 09:49:15
2013-08-10 09:59:15	24.96	27.32		9.78858	-25.4434	-27.8491
2013-08-10 10:09:15	25.02	27.36		9.79552	-25.5046	-27.8899
2013-08-10 10:19:15	25.04	27.39		9.80247	-25.525	-27.9205
2013-08-10 10:29:15	25.07	27.42		9.80941	-25.5556	-27.9511
2013-08-10 10:39:15	25.09	27.45		9.81636	-25.5759	-27.9817
2013-08-10 10:49:15	25.12	27.48		9.8233	-25.6065	-28.0122	2013-08-10 10:49:15
2013-08-10 10:59:15	25.16	27.51		9.83025	-25.6473	-28.0428
2013-08-10 11:09:15	25.19	27.54		9.83719	-25.6779	-28.0734
2013-08-10 11:19:15	25.22	27.57		9.84414	-25.7085	-28.104
2013-08-10 11:29:15	25.24	27.58		9.85108	-25.7288	-28.1142
2013-08-10 11:39:15	25.27	27.62		9.85802	-25.7594	-28.1549
2013-08-10 11:49:15	25.31	27.65		9.86497	-25.8002	-28.1855	2013-08-10 11:49:15
2013-08-10 11:59:15	25.34	27.69		9.87191	-25.8308	-28.2263
2013-08-10 12:09:15	25.34	27.7		9.87886	-25.8308	-28.2365
2013-08-10 12:19:15	25.4	27.74		9.8858	-25.8919	-28.2773
2013-08-10 12:29:15	25.4	27.76		9.89275	-25.8919	-28.2977
2013-08-10 12:39:15	25.43	27.78		9.89969	-25.9225	-28.318
2013-08-10 12:49:15	25.46	27.81		9.90664	-25.9531	-28.3486	2013-08-10 12:49:15
2013-08-10 12:59:15	25.48	27.83		9.91358	-25.9735	-28.369
2013-08-10 13:09:15	25.51	27.86		9.92052	-26.0041	-28.3996
2013-08-10 13:19:15	25.53	27.88		9.92747	-26.0245	-28.42
2013-08-10 13:29:15	25.56	27.9		9.93441	-26.055	-28.4404
2013-08-10 13:39:15	25.58	27.94		9.94136	-26.0754	-28.4811
2013-08-10 13:49:15	25.61	27.96		9.9483	-26.106	-28.5015	2013-08-10 13:49:15
2013-08-10 13:59:15	25.65	28.01		9.95525	-26.1468	-28.5525
2013-08-10 14:09:15	25.66	28.01		9.96219	-26.157	-28.5525
2013-08-10 14:19:15	25.7	28.05		9.96914	-26.1978	-28.5933
2013-08-10 14:29:15	25.73	28.07		9.97608	-26.2283	-28.6137
2013-08-10 14:39:15	25.75	28.1		9.98302	-26.2487	-28.6442
2013-08-10 14:49:15	25.78	28.13		9.98997	-26.2793	-28.6748	2013-08-10 14:49:15
2013-08-10 14:59:15	25.81	28.16		9.99691	-26.3099	-28.7054
2013-08-10 15:09:15	25.85	28.21		10.0039	-26.3507	-28.7564
2013-08-10 15:19:15	25.85	28.2		10.0108	-26.3507	-28.7462
2013-08-10 15:29:15	25.91	28.24		10.0177	-26.4118	-28.787
2013-08-10 15:39:15	25.92	28.29		10.0247	-26.422	-28.8379
2013-08-10 15:49:15	25.97	28.31		10.0316	-26.473	-28.8583	2013-08-10 15:49:15
2013-08-10 15:59:15	25.99	28.35		10.0386	-26.4934	-28.8991
2013-08-10 16:09:15	26.01	28.37		10.0455	-26.5138	-28.9195
2013-08-10 16:19:15	26.06	28.4		10.0525	-26.5647	-28.9501
2013-08-10 16:29:15	26.1	28.45		10.0594	-26.6055	-29.001
2013-08-10 16:39:15	26.14	28.47		10.0664	-26.6463	-29.0214
2013-08-10 16:49:15	26.16	28.51		10.0733	-26.6667	-29.0622	2013-08-10 16:49:15
2013-08-10 16:59:15	26.18	28.52		10.0802	-26.6871	-29.0724
2013-08-10 17:09:15	26.22	28.56		10.0872	-26.7278	-29.1131
2013-08-10 17:29:15	26.06	28.45		10.1011	-26.5647	-29.001
2013-08-10 17:39:15	26.22	28.6		10.108	-26.7278	-29.1539
2013-08-10 17:49:15	26.27	28.66		10.115	-26.7788	-29.2151
2013-08-10 17:59:15	26.28	28.68		10.1219	-26.789	-29.2355	2013-08-10 17:59:15
2013-08-10 18:09:15	26.34	28.71		10.1289	-26.8502	-29.2661
2013-08-10 18:19:15	26.38	28.74		10.1358	-26.8909	-29.2966
2013-08-10 18:29:15	26.42	28.76		10.1427	-26.9317	-29.317
2013-08-10 18:39:15	26.47	28.8		10.1497	-26.9827	-29.3578
2013-08-10 18:49:15	26.49	28.83		10.1566	-27.0031	-29.3884
2013-08-10 18:59:15	26.53	28.86		10.1636	-27.0438	-29.419	2013-08-10 18:59:15
2013-08-10 19:09:15	26.61	28.9		10.1705	-27.1254	-29.4597
2013-08-10 19:19:15	26.61	28.93		10.1775	-27.1254	-29.4903
2013-08-10 19:29:15	26.66	28.95		10.1844	-27.1764	-29.5107
2013-08-10 19:39:15	26.66	29		10.1914	-27.1764	-29.5617
2013-08-10 19:49:15	26.7	29.03		10.1983	-27.2171	-29.5923
2013-08-10 19:59:15	26.74	29.07		10.2052	-27.2579	-29.633	2013-08-10 19:59:15
2013-08-10 20:09:15	26.74	29.07		10.2122	-27.2579	-29.633
2013-08-10 20:19:15	26.76	29.1		10.2191	-27.2783	-29.6636
2013-08-10 20:29:15	26.82	29.14		10.2261	-27.3394	-29.7044
2013-08-10 20:39:15	26.84	29.15		10.233	-27.3598	-29.7146
2013-08-10 20:49:15	26.89	29.21		10.24	-27.4108	-29.7757
2013-08-10 20:59:15	26.91	29.24		10.2469	-27.4312	-29.8063	2013-08-10 20:59:15
2013-08-10 21:09:15	26.93	29.28		10.2539	-27.4516	-29.8471
2013-08-10 21:19:15	26.96	29.31		10.2608	-27.4822	-29.8777
2013-08-10 21:29:15	26.99	29.33		10.2677	-27.5127	-29.8981
2013-08-10 21:39:15	27.03	29.37		10.2747	-27.5535	-29.9388
2013-08-10 21:49:15	27.05	29.39		10.2816	-27.5739	-29.9592
2013-08-10 21:59:15	27.09	29.43		10.2886	-27.6147	-30	2013-08-10 21:59:15
2013-08-10 22:09:15	27.15	29.46		10.2955	-27.6758	-30.0306
2013-08-10 22:19:15	27.16	29.5		10.3025	-27.686	-30.0714
2013-08-10 22:29:15	27.17	29.53		10.3094	-27.6962	-30.1019
2013-08-10 22:39:15	27.22	29.57		10.3164	-27.7472	-30.1427
2013-08-10 22:49:15	27.28	29.62		10.3233	-27.8084	-30.1937
2013-08-10 22:59:15	27.3	29.66		10.3302	-27.8287	-30.2345	2013-08-10 22:59:15
2013-08-10 23:09:15	27.33	29.69		10.3372	-27.8593	-30.265
2013-08-10 23:19:15	27.35	29.71		10.3441	-27.8797	-30.2854
2013-08-10 23:29:15	27.39	29.75		10.3511	-27.9205	-30.3262
2013-08-10 23:39:15	27.43	29.79		10.358	-27.9613	-30.367
2013-08-10 23:49:15	27.48	29.83		10.365	-28.0122	-30.4077
2013-08-10 23:59:15	27.51	29.86		10.3719	-28.0428	-30.4383	2013-08-10 23:59:15
2013-08-11 00:09:15	27.54	29.9		10.3789	-28.0734	-30.4791
2013-08-11 00:19:15	27.57	29.93		10.3858	-28.104	-30.5097
2013-08-11 00:29:15	27.61	29.97		10.3927	-28.1448	-30.5505
2013-08-11 00:39:15	27.64	30		10.3997	-28.1753	-30.581
2013-08-11 00:49:15	27.67	30.02		10.4066	-28.2059	-30.6014
2013-08-11 00:59:15	27.69	30.07		10.4136	-28.2263	-30.6524	2013-08-11 00:59:15
2013-08-11 01:09:15	27.72	30.1		10.4205	-28.2569	-30.683
2013-08-11 01:19:15	27.76	30.13		10.4275	-28.2977	-30.7136
2013-08-11 01:29:15	27.8	30.16		10.4344	-28.3384	-30.7441
2013-08-11 01:39:15	27.83	30.21		10.4414	-28.369	-30.7951
2013-08-11 01:49:15	27.89	30.24		10.4483	-28.4302	-30.8257
2013-08-11 01:59:15	27.9	30.28		10.4552	-28.4404	-30.8665	2013-08-11 01:59:15
2013-08-11 02:09:15	27.94	30.3		10.4622	-28.4811	-30.8869
2013-08-11 02:19:15	27.98	30.35		10.4691	-28.5219	-30.9378
2013-08-11 02:29:15	28.03	30.39		10.4761	-28.5729	-30.9786
2013-08-11 02:39:15	28.07	30.43		10.483	-28.6137	-31.0194
2013-08-11 02:49:15	28.1	30.46		10.49	-28.6442	-31.0499
2013-08-11 02:59:15	28.16	30.49		10.4969	-28.7054	-31.0805	2013-08-11 02:59:15
2013-08-11 03:09:15	28.17	30.55		10.5039	-28.7156	-31.1417
2013-08-11 03:19:15	28.21	30.58		10.5108	-28.7564	-31.1723
2013-08-11 03:29:15	28.26	30.63		10.5177	-28.8073	-31.2232
2013-08-11 03:39:15	28.29	30.67		10.5247	-28.8379	-31.264
2013-08-11 03:49:15	28.34	30.71		10.5316	-28.8889	-31.3048
2013-08-11 03:59:15	28.4	30.74		10.5386	-28.9501	-31.3354	2013-08-11 03:59:15
2013-08-11 04:09:15	28.42	30.78		10.5455	-28.9704	-31.3761
2013-08-11 04:19:15	28.45	30.82		10.5525	-29.001	-31.4169
2013-08-11 04:29:15	28.5	30.87		10.5594	-29.052	-31.4679
2013-08-11 04:39:15	28.56	30.91		10.5664	-29.1131	-31.5087
2013-08-11 04:49:15	28.59	30.96		10.5733	-29.1437	-31.5596
2013-08-11 04:59:15	28.63	30.99		10.5802	-29.1845	-31.5902	2013-08-11 04:59:15
2013-08-11 05:09:15	28.66	31.04		10.5872	-29.2151	-31.6412
2013-08-11 05:19:15	28.71	31.06		10.5941	-29.2661	-31.6616
2013-08-11 05:29:15	28.61	31.01		10.6011	-29.1641	-31.6106
2013-08-11 05:39:15	28.74	31.14		10.608	-29.2966	-31.7431
2013-08-11 05:49:15	28.8	31.18		10.615	-29.3578	-31.7839
2013-08-11 05:59:15	28.85	31.24		10.6219	-29.4088	-31.8451	2013-08-11 05:59:15
2013-08-11 06:09:15	28.91	31.29		10.6289	-29.4699	-31.896
2013-08-11 06:19:15	28.95	31.34		10.6358	-29.5107	-31.947
2013-08-11 06:29:15	29	31.38		10.6427	-29.5617	-31.9878
2013-08-11 06:39:15	29.05	31.44		10.6497	-29.6126	-32.0489
2013-08-11 06:49:15	29.11	31.49		10.6566	-29.6738	-32.0999
2013-08-11 06:59:15	29.15	31.53		10.6636	-29.7146	-32.1407	2013-08-11 06:59:15
2013-08-11 07:09:15	29.2	31.59		10.6705	-29.7655	-32.2018
2013-08-11 07:19:15	29.24	31.62		10.6775	-29.8063	-32.2324
2013-08-11 07:29:15	29.29	31.67		10.6844	-29.8573	-32.2834
2013-08-11 07:39:15	29.33	31.71		10.6914	-29.8981	-32.3242
2013-08-11 07:49:15	29.38	31.76		10.6983	-29.949	-32.3751
2013-08-11 07:59:15	29.42	31.81		10.7052	-29.9898	-32.4261	2013-08-11 07:59:15
2013-08-11 08:09:15	29.47	31.85		10.7122	-30.0408	-32.4669
2013-08-11 08:19:15	29.52	31.89		10.7191	-30.0917	-32.5076
2013-08-11 08:29:15	29.56	31.93		10.7261	-30.1325	-32.5484
2013-08-11 08:39:15	29.6	31.99		10.733	-30.1733	-32.6096
2013-08-11 08:49:15	29.66	32.05		10.74	-30.2345	-32.6707
2013-08-11 08:59:15	29.7	32.07		10.7469	-30.2752	-32.6911	2013-08-11 08:59:15
2013-08-11 09:09:15	29.74	32.12		10.7539	-30.316	-32.7421
2013-08-11 09:19:15	29.79	32.18		10.7608	-30.367	-32.8033
2013-08-11 09:29:15	29.85	32.23		10.7677	-30.4281	-32.8542
2013-08-11 09:39:15	29.9	32.27		10.7747	-30.4791	-32.895
2013-08-11 09:49:15	29.94	32.31		10.7816	-30.5199	-32.9358
2013-08-11 09:59:15	29.97	32.35		10.7886	-30.5505	-32.9766	2013-08-11 09:59:15
2013-08-11 10:09:15	30.02	32.41		10.7955	-30.6014	-33.0377
2013-08-11 10:19:15	30.06	32.45		10.8025	-30.6422	-33.0785
2013-08-11 10:29:15	30.11	32.5		10.8094	-30.6932	-33.1295
2013-08-11 10:39:15	30.15	32.53		10.8164	-30.7339	-33.16
2013-08-11 10:49:15	30.2	32.58		10.8233	-30.7849	-33.211
2013-08-11 10:59:15	30.24	32.63		10.8302	-30.8257	-33.262	2013-08-11 10:59:15
2013-08-11 11:09:15	30.29	32.67		10.8372	-30.8767	-33.3028
2013-08-11 11:19:15	30.33	32.72		10.8441	-30.9174	-33.3537
2013-08-11 11:29:15	30.36	32.76		10.8511	-30.948	-33.3945
2013-08-11 11:39:15	30.43	32.79		10.858	-31.0194	-33.4251
2013-08-11 11:49:15	30.47	32.85		10.865	-31.0601	-33.4862
2013-08-11 11:59:15	30.52	32.89		10.8719	-31.1111	-33.527	2013-08-11 11:59:15
2013-08-11 12:09:15	30.56	32.94		10.8789	-31.1519	-33.578
2013-08-11 12:19:15	30.61	32.97		10.8858	-31.2029	-33.6086
2013-08-11 12:29:15	30.66	33.01		10.8927	-31.2538	-33.6493
2013-08-11 12:39:15	30.72	33.06		10.8997	-31.315	-33.7003
2013-08-11 12:49:15	30.74	33.11		10.9066	-31.3354	-33.7513
2013-08-11 12:59:15	30.79	33.16		10.9136	-31.3863	-33.8022	2013-08-11 12:59:15
2013-08-11 13:09:15	30.85	33.21		10.9205	-31.4475	-33.8532
2013-08-11 13:19:15	30.89	33.25		10.9275	-31.4883	-33.894
2013-08-11 13:29:15	30.93	33.3		10.9344	-31.5291	-33.945
2013-08-11 13:39:15	31	33.36		10.9414	-31.6004	-34.0061
2013-08-11 13:49:15	31.06	33.4		10.9483	-31.6616	-34.0469
2013-08-11 13:59:15	31.1	33.45		10.9552	-31.7023	-34.0979	2013-08-11 13:59:15
2013-08-11 14:09:15	31.14	33.5		10.9622	-31.7431	-34.1488
2013-08-11 14:19:15	31.18	33.55		10.9691	-31.7839	-34.1998
2013-08-11 14:29:15	31.22	33.6		10.9761	-31.8247	-34.2508
2013-08-11 14:39:15	31.29	33.66		10.983	-31.896	-34.3119
2013-08-11 14:49:15	31.34	33.7		10.99	-31.947	-34.3527
2013-08-11 14:59:15	31.39	33.76		10.9969	-31.998	-34.4139	2013-08-11 14:59:15
2013-08-11 15:09:15	31.45	33.78		11.0039	-32.0591	-34.4343
2013-08-11 15:19:15	31.47	33.85		11.0108	-32.0795	-34.5056
2013-08-11 15:29:15	31.55	33.9		11.0177	-32.1611	-34.5566
2013-08-11 15:39:15	31.59	33.96		11.0247	-32.2018	-34.6177
2013-08-11 15:49:15	31.63	34.01		11.0316	-32.2426	-34.6687
2013-08-11 15:59:15	31.71	34.05		11.0386	-32.3242	-34.7095	2013-08-11 15:59:15
2013-08-11 16:09:15	31.73	34.11		11.0455	-32.3445	-34.7706
2013-08-11 16:19:15	31.79	34.15		11.0525	-32.4057	-34.8114
2013-08-11 16:29:15	31.83	34.21		11.0594	-32.4465	-34.8726
2013-08-11 16:39:15	31.91	34.25		11.0664	-32.528	-34.9134
2013-08-11 16:49:15	31.99	34.32		11.0733	-32.6096	-34.9847
2013-08-11 16:59:15	32.01	34.39		11.0802	-32.63	-35.0561	2013-08-11 16:59:15
2013-08-11 17:09:15	32.05	34.42		11.0872	-32.6707	-35.0866
2013-08-11 17:19:15	32.1	34.49		11.0941	-32.7217	-35.158
2013-08-11 17:29:15	32.16	34.53		11.1011	-32.7829	-35.1988
2013-08-11 17:39:15	32.22	34.59		11.108	-32.844	-35.2599
2013-08-11 17:49:15	32.29	34.63		11.115	-32.9154	-35.3007
2013-08-11 17:59:15	32.33	34.71		11.1219	-32.9562	-35.3823	2013-08-11 17:59:15
2013-08-11 18:09:15	32.4	34.77		11.1289	-33.0275	-35.4434
2013-08-11 18:19:15	32.43	34.81		11.1358	-33.0581	-35.4842
2013-08-11 18:29:15	32.48	34.85		11.1427	-33.1091	-35.525
2013-08-11 18:39:15	32.51	34.92		11.1497	-33.1397	-35.5963
2013-08-11 18:49:15	32.61	34.97		11.1566	-33.2416	-35.6473
2013-08-11 18:59:15	32.65	35.02		11.1636	-33.2824	-35.6983	2013-08-11 18:59:15
2013-08-11 19:09:15	32.7	35.08		11.1705	-33.3333	-35.7594
2013-08-11 19:19:15	32.78	35.15		11.1775	-33.4149	-35.8308
2013-08-11 19:29:15	32.83	35.2		11.1844	-33.4659	-35.8818
2013-08-11 19:39:15	32.9	35.27		11.1914	-33.5372	-35.9531
2013-08-11 19:49:15	32.97	35.31		11.1983	-33.6086	-35.9939
2013-08-11 19:59:15	33	35.38		11.2052	-33.6391	-36.0652	2013-08-11 19:59:15
2013-08-11 20:09:15	33.06	35.43		11.2122	-33.7003	-36.1162
2013-08-11 20:19:15	33.11	35.5		11.2191	-33.7513	-36.1876
2013-08-11 20:29:15	32.98	35.36		11.2261	-33.6188	-36.0449
2013-08-11 20:39:15	33.13	35.53		11.233	-33.7717	-36.2181
2013-08-11 20:49:15	33.22	35.6		11.24	-33.8634	-36.2895
2013-08-11 20:59:15	33.27	35.67		11.2469	-33.9144	-36.3609	2013-08-11 20:59:15
2013-08-11 21:09:15	33.33	35.72		11.2539	-33.9755	-36.4118
2013-08-11 21:19:15	33.39	35.77		11.2608	-34.0367	-36.4628
2013-08-11 21:29:15	33.44	35.83		11.2677	-34.0877	-36.524
2013-08-11 21:39:15	33.49	35.89		11.2747	-34.1386	-36.5851
2013-08-11 21:49:15	33.55	35.93		11.2816	-34.1998	-36.6259
2013-08-11 21:59:15	33.6	36		11.2886	-34.2508	-36.6972	2013-08-11 21:59:15
2013-08-11 22:09:15	33.67	36.06		11.2955	-34.3221	-36.7584
2013-08-11 22:19:15	33.73	36.12		11.3025	-34.3833	-36.8196
2013-08-11 22:29:15	33.8	36.19		11.3094	-34.4546	-36.8909
2013-08-11 22:39:15	33.9	36.27		11.3164	-34.5566	-36.9725
2013-08-11 22:49:15	33.94	36.33		11.3233	-34.5973	-37.0336
[truncated: 2,910 more rows]

## Sheet: Tensi
Zeit [d]	MP bot(2) [cm]	MP top(1) [cm]		air entry bot		AE time	AE [cm]	Type	Pos	Weight
0.0108024	-3.99592	-6.62589		2013-08-30 08:59:15	8800	29.7469	-8970.44	1	2	1
0.0524691	-4.57696	-7.13558
0.0941357	-4.87258	-7.40061		air entry top
0.135802	-5.07645	-7.60449		Time				Type	Pos	Weight
0.177469	-5.33129	-7.85933		2013-08-26 09:09:15	8800	25.7539	-8970.44	1	1	1
0.219136	-5.60652	-8.13456
0.260802	-5.88175	-8.40979
0.302469	-5.85117	-8.3792
0.344136	-6.1264	-8.65443
0.385802	-6.30989	-8.85831
0.427469	-6.52396	-9.06218
0.469136	-6.62589	-9.15392
0.510802	-6.80938	-9.31702
0.552469	-6.91131	-9.43935
0.594136	-7.01325	-9.53109
0.635802	-7.14577	-9.6738
0.677469	-7.22732	-9.76555
0.719136	-7.38022	-9.89806
0.767747	-7.53313	-10.0612
0.809414	-7.55352	-10.0917
0.858025	-7.65545	-10.1937
0.899691	-7.7472	-10.2956
0.941358	-7.81855	-10.3568
0.983025	-7.96126	-10.4995
1.03164	-8.01223	-10.5607
1.0733	-8.05301	-10.6014
1.11497	-8.04281	-10.581
1.15664	-8.18552	-10.7238
1.1983	-8.28746	-10.8359
1.24691	-8.25688	-10.8155
1.28858	-8.48114	-11.0194
1.33025	-8.5525	-11.0805
1.37886	-8.7054	-11.2334
1.42052	-8.75637	-11.2946
1.46219	-8.75637	-11.2844
1.5108	-8.90928	-11.4373
1.55247	-8.96024	-11.4883
1.59414	-9.06218	-11.5902
1.6358	-9.17431	-11.7023
1.68441	-9.21509	-11.7431
1.72608	-9.27625	-11.8043
1.76775	-9.29664	-11.8145
1.80941	-9.36799	-11.8756
1.85108	-9.41896	-11.9368
1.89275	-9.48012	-12.0082
1.93441	-9.5107	-12.0285
1.97608	-9.64322	-12.1611
2.01775	-9.73496	-12.2528
2.05941	-9.81651	-12.3445
2.10802	-9.88787	-12.4159
2.15664	-10.0204	-12.5382
2.20525	-9.89806	-12.4363
2.24691	-10.0815	-12.5994
2.28858	-10.2141	-12.7319
2.33025	-10.3466	-12.8746
2.37191	-10.4587	-12.9766
2.41358	-10.5301	-13.0581
2.45525	-10.6422	-13.16
2.49691	-10.6728	-13.1804
2.53858	-10.7645	-13.2926
2.58025	-10.8563	-13.3741
2.62191	-10.9276	-13.4455
2.66358	-11.0092	-13.527
2.71219	-11.0296	-13.5372
2.7608	-11.1009	-13.6188
2.80247	-11.2029	-13.7003
2.84414	-11.264	-13.7819
2.8858	-11.3354	-13.8532
2.92747	-11.3863	-13.8634
2.96914	-11.4679	-13.9755
3.0108	-11.2029	-13.7207
3.05941	-11.5596	-14.0571
3.10108	-11.6514	-14.1488
3.14275	-11.7431	-14.2406
3.18441	-11.8145	-14.3221
3.23302	-11.947	-14.4037
3.28164	-11.58	-14.0571
3.33025	-11.7839	-14.2712
3.37191	-11.9062	-14.3935
3.41358	-11.9878	-14.475
3.45525	-12.0999	-14.5668
3.49691	-12.1611	-14.6483
3.53858	-12.263	-14.7401
3.58025	-12.3445	-14.8318
3.62191	-12.4057	-14.893
3.66358	-12.4873	-14.9643
3.70525	-12.5688	-15.0357
3.74691	-12.6402	-15.1274
3.78858	-12.7013	-15.1988
3.83719	-12.8135	-15.2905
3.87886	-12.9154	-15.3721
3.92052	-12.9867	-15.4638
3.96219	-13.0683	-15.5352
4.0108	-13.16	-15.6371
4.05247	-13.262	-15.6983
4.09414	-13.3129	-15.79
4.1358	-13.3843	-15.8614
4.17747	-13.4659	-15.9225
4.21914	-13.1906	-15.6983
4.2608	-13.4964	-15.9735
4.30247	-13.5882	-16.0652
4.34414	-13.6901	-16.1468
4.3858	-13.7615	-16.2283
4.42747	-13.843	-16.2997
4.46914	-13.9042	-16.371
4.5108	-13.9755	-16.4526
4.55247	-14.0571	-16.524
4.59414	-14.1081	-16.5749
4.6358	-14.1896	-16.6667
4.67747	-14.2508	-16.7278
4.71914	-14.3425	-16.8094
4.7608	-14.2813	-16.7686
4.80247	-14.4139	-16.8807
4.84414	-14.4852	-16.9419
4.8858	-14.5158	-16.9827
4.92747	-14.5973	-17.0744
4.96914	-14.6789	-17.1254
5.0108	-14.7604	-17.2069
5.05247	-14.8624	-17.2885
5.09414	-14.9643	-17.3904
5.1358	-15.0459	-17.4924
5.17747	-15.1478	-17.6045
5.21914	-15.2803	-17.7166
5.2608	-15.3313	-17.7472
5.30247	-15.4128	-17.8593
5.34414	-15.5148	-17.9511
5.3858	-15.5759	-18.0326
5.42747	-15.6677	-18.104
5.46914	-15.7288	-18.1651
5.5108	-15.79	-18.2365
5.55247	-15.8716	-18.2977
5.59414	-15.9327	-18.369
5.6358	-15.9939	-18.4302
5.67747	-16.0347	-18.4913
5.71914	-16.0652	-18.5117
5.7608	-16.1162	-18.5525
5.80247	-16.1774	-18.6137
5.84414	-16.2487	-18.685
5.8858	-16.2895	-18.7258
5.92747	-16.2691	-18.6952
5.96914	-16.4118	-18.8379
6.0108	-16.5341	-18.9501
6.05247	-16.6361	-19.0724
6.09414	-16.7584	-19.1539
6.1358	-16.1162	-18.5831
6.18441	-16.7992	-19.2355
6.22608	-16.9317	-19.3884
6.26775	-17.0642	-19.5107
6.30941	-17.1356	-19.5923
6.35108	-17.2273	-19.684
6.39275	-17.3191	-19.7757
6.43441	-17.3802	-19.8471
6.47608	-17.472	-19.9286
6.51775	-17.5433	-20
6.55941	-17.6045	-20.0714
6.60108	-17.7064	-20.1427
6.64275	-17.737	-20.1835
6.68441	-17.7982	-20.2446
6.72608	-17.788	-20.2345
6.76775	-17.9613	-20.4077
6.80941	-18.0632	-20.4791
6.85108	-18.1346	-20.5708
6.89275	-18.1957	-20.6422
6.93441	-18.2161	-20.6728
6.97608	-18.318	-20.7645
7.01775	-18.4098	-20.8359
7.05941	-18.5015	-20.9276
7.10108	-18.5729	-20.9888
7.14275	-18.6442	-21.0601
7.18441	-18.736	-21.1519
7.22608	-18.7768	-21.1825
7.26775	-18.8277	-21.2538
7.30941	-18.9195	-21.3354
7.35802	-19.0112	-21.3965
7.39969	-19.001	-21.4271
7.44136	-19.0826	-21.5087
7.48302	-19.1437	-21.5698
7.52469	-19.2253	-21.6412
7.56636	-19.2966	-21.6922
7.60802	-19.3476	-21.7635
7.64969	-19.419	-21.8247
7.69136	-19.4801	-21.896
7.73302	-19.3374	-21.7533
7.77469	-19.6126	-22.0082
7.81636	-19.6534	-22.0591
7.85802	-19.7146	-22.1305
7.89969	-19.8165	-22.212
7.94136	-19.9083	-22.3038
7.98302	-20.0102	-22.4057
8.02469	-20.0917	-22.4975
8.06636	-20.1733	-22.5688
8.10802	-20.265	-22.6504
8.14969	-20.3568	-22.7523
8.19136	-20.4689	-22.8236
8.23302	-20.5505	-22.9562
8.27469	-20.6626	-23.0479
8.31636	-20.7747	-23.16
8.35802	-20.8665	-23.2518
8.39969	-20.948	-23.3537
8.44136	-21.0398	-23.4659
8.48302	-21.1315	-23.5576
8.52469	-21.2436	-23.6493
8.56636	-21.3456	-23.7615
8.60802	-21.4679	-23.8838
8.64969	-21.5902	-23.9959
8.69136	-21.6922	-24.1081
8.73302	-21.8247	-24.2202
8.77469	-21.9776	-24.3833
8.81636	-22.0591	-24.475
8.85802	-22.1916	-24.5973
8.89969	-22.3344	-24.7401
8.94136	-22.4159	-24.842
8.98302	-22.5892	-24.9745
9.02469	-22.7115	-25.1376
9.06636	-22.8644	-25.2803
9.10802	-23.0173	-25.4332
9.14969	-22.9154	-25.3415
9.19136	-23.3028	-25.7187
9.23302	-23.4455	-25.841
9.27469	-23.5984	-26.0041
9.31636	-23.7207	-26.1468
9.35802	-23.8736	-26.2997
9.39969	-24.0061	-26.4322
9.44136	-24.1488	-26.5851
9.48302	-24.3119	-26.7278
9.52469	-24.4648	-26.8909
9.56636	-24.6075	-27.0438
9.60802	-24.7604	-27.1967
9.64969	-24.893	-27.3394
9.69136	-25.0663	-27.4924
9.73302	-25.2497	-27.6656
9.78164	-25.4027	-27.8084
9.8233	-25.6065	-28.0122
9.86497	-25.8002	-28.1855
9.90664	-25.9531	-28.3486
9.9483	-26.106	-28.5015
9.98997	-26.2793	-28.6748
10.0316	-26.473	-28.8583
10.0733	-26.6667	-29.0622
10.1219	-26.789	-29.2355
10.1636	-27.0438	-29.419
10.2052	-27.2579	-29.633
10.2469	-27.4312	-29.8063
10.2886	-27.6147	-30
10.3302	-27.8287	-30.2345
10.3719	-28.0428	-30.4383
10.4136	-28.2263	-30.6524
10.4552	-28.4404	-30.8665
10.4969	-28.7054	-31.0805
10.5386	-28.9501	-31.3354
10.5802	-29.1845	-31.5902
10.6219	-29.4088	-31.8451
10.6636	-29.7146	-32.1407
10.7052	-29.9898	-32.4261
10.7469	-30.2752	-32.6911
10.7886	-30.5505	-32.9766
10.8302	-30.8257	-33.262
10.8719	-31.1111	-33.527
10.9136	-31.3863	-33.8022
10.9552	-31.7023	-34.0979
10.9969	-31.998	-34.4139
11.0386	-32.3242	-34.7095
11.0802	-32.63	-35.0561
11.1219	-32.9562	-35.3823
11.1636	-33.2824	-35.6983
11.2052	-33.6391	-36.0652
11.2469	-33.9144	-36.3609
11.2886	-34.2508	-36.6972
11.3302	-34.6585	-37.0846
11.3719	-34.9949	-37.4414
11.4136	-35.3721	-37.788
11.4552	-35.739	-38.1753
11.4969	-36.1468	-38.5831
11.5386	-36.5647	-38.9399
11.5802	-36.9827	-39.4088
11.6219	-37.3904	-39.8267
11.6636	-37.8491	-40.2548
11.7052	-38.2263	-40.6728
11.7469	-38.6748	-41.1111
11.7886	-39.0826	-41.5087
11.8302	-39.5821	-42.0082
11.8719	-40.051	-42.4567
11.9136	-40.4383	-42.8542
11.9552	-40.9786	-43.3843
11.9969	-41.4781	-43.8838
12.0386	-41.9368	-44.3731
12.0802	-42.4771	-44.8828
12.1219	-42.9358	-45.3619
12.1636	-43.5678	-46.0143
12.2122	-44.261	-46.6972
12.2608	-45.0255	-47.4516
12.3025	-45.6575	-48.1244
12.3441	-46.4526	-48.8481
12.3858	-47.1865	-49.6432
12.4275	-47.9511	-50.4077
12.4691	-48.7258	-51.2029
12.5108	-49.5617	-52.0285
12.5594	-50.5607	-53.0071
12.6011	-51.5087	-53.9755
12.6427	-52.4975	-54.9235
12.6844	-53.476	-55.9531
12.7261	-54.4954	-56.9623
12.7677	-55.5657	-58.0122
12.8094	-56.6667	-59.1335
12.8511	-57.7166	-60.2039
12.8927	-58.8277	-61.3252
12.9344	-60.0408	-62.5076
12.9761	-61.4169	-63.9042
13.0177	-62.8746	-65.3415
13.0594	-64.1794	-66.6871
13.1011	-65.8002	-68.318
13.1427	-67.37	-69.8777
13.1844	-68.6544	-71.2232
13.2261	-70.632	-73.1804
13.2677	-72.3445	-74.8624
13.3094	-74.1284	-76.6769
13.3511	-76.0041	-78.5831
13.3927	-77.9613	-80.4893
13.4344	-79.8369	-82.4261
13.4761	-81.7431	-84.3119
13.5177	-83.6799	-86.2691
13.5664	-85.9633	-88.5831
13.608	-87.8593	-90.4893
13.6497	-89.7248	-92.3649
13.6914	-91.4985	-94.21
13.733	-93.1295	-96.1264
13.7747	-95.3925	-98.053
13.8164	-97.3598	-100.071
13.858	-99.3476	-102.029
13.8997	-101.376	-104.098
13.9414	-103.405	-106.106
13.983	-105.474	-108.247
14.0247	-107.655	-110.469
14.0664	-109.776	-112.559
14.108	-112.018	-114.822
14.1566	-114.404	-117.329
14.1983	-116.789	-119.704
14.24	-119.113	-122.1
14.2816	-121.631	-124.72
14.3302	-124.577	-127.696
14.3719	-126.942	-130.163
14.4136	-129.307	-132.63
14.4552	-131.672	-135.076
14.4969	-134.006	-137.441
14.5386	-136.218	-139.664
14.5802	-138.318	-141.835
14.6219	-140.285	-143.833
14.6636	-142.09	-145.607
14.7052	-143.782	-147.38
14.7469	-145.423	-149.083
14.8164	-147.176	-150.846
14.858	-148.277	-152.018
14.9066	-149.735	-153.415
14.9483	-150.836	-154.495
14.9969	-152.029	-155.739
15.0386	-152.987	-156.677
15.0802	-153.721	-157.523
15.1219	-154.597	-158.349
15.1636	-155.362	-159.103
15.2122	-156.086	-159.837
15.2539	-156.86	-160.601
15.2955	-157.431	-161.172
15.3372	-157.951	-161.702
15.3789	-158.471	-162.161
15.4205	-158.96	-162.671
15.4622	-159.48	-163.129
15.5039	-159.888	-163.578
15.5455	-160.336	-164.027
15.5872	-160.785	-164.455
15.6289	-161.152	-164.862
15.6705	-161.631	-165.27
15.7261	-162.243	-165.902
15.7677	-162.426	-166.065
15.8094	-162.813	-166.453
15.8511	-163.293	-166.911
15.8927	-163.649	-167.258
15.9344	-163.925	-167.543
15.9761	-164.251	-167.839
16.0177	-164.577	-168.165
16.0594	-164.883	-168.522
16.1011	-165.229	-168.889
16.1427	-165.545	-169.185
16.1844	-165.219	-169.256
16.2261	-166.228	-169.796
16.2677	-166.555	-170.173
16.3094	-166.779	-170.428
16.3511	-167.044	-170.693
16.3927	-167.329	-170.999
16.4344	-167.564	-171.244
16.4761	-167.798	-171.519
16.5177	-167.961	-171.682
16.5594	-168.226	-172.008
16.6011	-168.43	-172.232
16.6427	-168.614	-172.457
16.6914	-168.848	-172.752
16.733	-169.113	-173.048
16.7747	-169.327	-173.262
16.8164	-169.613	-173.547
16.858	-169.878	-173.863
16.8997	-170.102	-174.149
16.9414	-170.326	-174.434
16.983	-170.55	-174.709
17.0316	-170.673	-174.924
17.0733	-170.928	-175.311
17.115	-171.182	-175.678
17.1566	-171.448	-176.024
17.1983	-171.651	-176.33
17.24	-171.988	-176.718
17.2816	-172.192	-177.085
17.3233	-172.334	-177.278
17.365	-172.508	-177.594
17.4066	-172.732	-177.961
17.4483	-172.885	-178.216
17.49	-173.119	-178.624
17.5316	-173.293	-178.909
17.5733	-173.496	-179.246
17.615	-173.68	-179.592
17.6566	-173.863	-179.929
17.6983	-174.047	-180.306
17.74	-174.251	-180.622
17.7816	-174.383	-180.968
17.8233	-174.679	-181.427
17.865	-174.913	-181.825
17.9066	-175.087	-182.263
17.9483	-175.331	-182.681
17.99	-175.545	-182.987
18.0316	-175.719	-183.466
18.0733	-175.882	-183.925
18.115	-176.004	-184.292
18.1566	-176.239	-184.76
18.2052	-175.933	-184.455
18.2469	-176.544	-185.556
18.2886	-176.697	-185.994
18.3302	-176.789	-186.391
18.3719	-177.003	-186.871
18.4136	-177.115	-187.299
18.4552	-177.248	-187.757
18.4969	-177.431	-188.216
18.5386	-177.594	-188.736
18.5802	-177.88	-189.358
18.6219	-178.022	-189.857
18.6636	-178.186	-190.377
18.7052	-178.359	-190.948
18.7469	-178.491	-191.427
18.7886	-178.746	-192.09
18.8302	-178.909	-192.681
18.8719	-179.164	-193.394
18.9136	-179.327	-193.996
18.9552	-179.592	-194.689
18.9969	-179.745	-195.392
19.0386	-179.857	-195.963
19.0802	-180.173	-196.707
19.1219	-180.347	-197.441
19.1636	-180.581	-198.257
19.2052	-180.734	-199.021
19.2539	-180.928	-199.949
19.3025	-180.408	-200.082
19.3441	-181.233	-201.509
19.3858	-181.529	-202.416
19.4275	-181.794	-203.466
19.4691	-181.998	-204.424
19.5108	-182.243	-205.423
19.5525	-182.508	-206.432
19.5941	-182.691	-207.492
19.6358	-182.915	-208.043
19.6775	-183.16	-209.572
19.7191	-183.272	-210.459
19.7608	-183.333	-211.468
19.8025	-183.456	-212.548
19.8441	-183.619	-213.782
19.8858	-183.843	-215.005
19.9275	-184.077	-216.29
19.9691	-184.353	-217.737
20.0108	-184.791	-219.266
20.0525	-185.046	-220.652
20.1011	-185.087	-222.171
20.1427	-185.362	-223.568
20.1844	-185.036	-224.393
20.2261	-185.443	-225.77
20.2747	-185.719	-227.686
20.3164	-185.943	-229.205
20.358	-186.239	-230.754
20.3997	-186.483	-232.508
20.4414	-186.748	-234.088
20.483	-187.044	-235.647
20.5247	-187.319	-237.319
20.5664	-187.625	-239.348
20.608	-187.9	-241.376
20.6497	-188.206	-243.231
20.6914	-188.502	-245.311
20.733	-188.614	-246.646
20.7747	-188.736	-248.634
20.8164	-188.879	-250.479
20.858	-189.052	-252.569
20.8997	-189.827	-255.545
20.9414	-190.204	-257.87
20.983	-190.387	-260.112
21.0247	-190.561	-262.701
21.0664	-190.489	-264.343
21.108	-190.765	-267.523
21.1497	-191.07	-270.377
21.1914	-191.407	-273.629
21.233	-188.053	-269.562
21.2816	-192.406	-280.571
21.3233	-192.732	-284.577
21.365	-193.038	-288.502
21.4066	-193.435	-292.436
21.4483	-193.629	-297.207
21.49	-193.955	-301.539
21.5316	-194.108	-305.331
21.5733	-194.526	-308.053
21.615	-194.699	-315.719
21.6566	-194.893	-320.683
21.6983	-195.066	-327.299
21.74	-195.117	-333.252
21.7816	-195.79	-340.52
21.8233	-196.014	-348.787
21.865	-196.198	-356.014
21.9066	-196.402	-364.659
21.9483	-196.555	-372.885
21.99	-195.362	-381.366
22.0316	-196.86	-395.005
22.0733	-197.023	-408.542
22.115	-197.38	-420.102
22.1566	-198.012	-438.736
22.1983	-198.532	-452.773
22.24	-199.021	-475.79
22.2816	-199.348	-495.627
22.3233	-199.755	-517.727
22.365	-200.02	-542.334
22.4066	-200.367	-561.121
22.4483	-200.815	-593.71
22.5108	-201.448
22.5386	-201.825
22.5802	-202.171
22.6219	-202.467
22.6636	-202.712
22.7052	-203.017
22.7469	-200.846
22.7886	-203.547
22.8372	-204.016
22.8789	-204.444
22.9275	-204.516
22.9691	-205.046
23.0177	-205.586
23.0594	-206.147
23.1011	-206.606
23.1427	-206.922
23.1844	-207.676
23.233	-208.206
23.2747	-209.093
23.3164	-209.011
23.358	-209.837
23.3997	-210.418
23.4414	-210.958
23.483	-211.427
23.5247	-211.886
23.5664	-212.314
23.608	-212.926
23.6497	-213.588
23.6914	-214.037
23.733	-214.689
23.7747	-215.189
23.8164	-215.678
23.858	-215.586
23.8997	-216.167
23.9414	-216.922
23.983	-217.645
24.0247	-218.094
24.0664	-218.675
24.108	-219.602
24.1497	-220.673
24.1914	-221.743
24.233	-222.722
24.2747	-223.537
24.3164	-224.75
24.358	-225.464
24.3997	-226.483
24.4483	-227.39
24.49	-228.461
24.5316	-229.113
24.5733	-230.428
24.615	-231.335
24.6636	-232.059
24.7052	-232.834
24.7469	-234.587
24.7886	-235.209
24.8302	-237.319
24.8719	-238.186
24.9136	-239.592
24.9552	-241.081
24.9969	-242.345
25.0386	-243.976
25.0802	-246.218
25.1219	-248.267
25.1636	-250.693
25.2052	-253.303
25.2469	-255.556
25.2886	-257.635
25.3302	-260.071
25.3719	-262.661
25.4136	-265.24
25.4552	-268.124
25.4969	-272.161
25.5386	-275.505
25.5802	-277.819
25.6219	-281.57
25.6636	-286.871
25.7122	-291.896
25.7539	-297.839
25.7955	-304.485
25.8372	-311.906
25.8789	-319.011
25.9205	-325.627
25.9622	-333.282
26.0039	-341.458
26.0455	-351.019
26.0872	-363.242
26.1289	-377.023
26.1705	-396.555
26.2122	-415.902
26.2539	-438.063
26.2955	-459.358
26.3372	-484.913
26.3789	-509.674
26.4205	-547.441
26.4622	-573.629
26.5039	-621.855
26.5455	-656.279
26.5872	-721.009
26.6289	-782.141
26.6705	-893.955
26.7122	-943.976
26.7469	-980.683
26.7747	-1053.31

## Sheet: HYDRUS
Data für die Zielfunktion: 2 x Tensionen, 1 x Endwassergehalt						Verdunstungsrate
Time	Obs	Type	Pos	Weight		Zeitintervall		Evarate [cm/d]			Type	1-Tension	2-Wassergehalt
0.0108024	-3.99592	1	2	1		0.684941	0	0.202061			Pos	1-top	2-bot	(von oben nach unten)
0.0524691	-4.57696	1	2	1		1.21336	0	0.216496			72	Time-Variable boundary conditions+
0.0941357	-4.87258	1	2	1		1.72795	0	0.202877			29.748	Final Time	Time Information
0.135802	-5.07645	1	2	1		1.8994	0	0.190149			1241	Number of Data Points in Objective Function
0.177469	-5.33129	1	2	1		2.16767	0	0.255707		Interpolated Values	-5.19535	BC-top	[hPa]
0.219136	-5.60652	1	2	1		2.66673	0	0.226828			-3.94535	MP_top_ini	[hPa]	1
0.260802	-5.88175	1	2	1		3.00264	0	0.200052			-0.940528	MP_bot_ini	[hPa]	2
0.302469	-5.85117	1	2	1		3.23543	0	0.207052			0.309472	BC-bot	[hPa]
0.344136	-6.1264	1	2	1		3.79407	0	0.169699
0.385802	-6.30989	1	2	1		4.20393	0	0.194214
0.427469	-6.52396	1	2	1		4.73208	0	0.185933
0.469136	-6.62589	1	2	1		4.93207	0	0.187005		Real Values	-7.7	BC-top	[cm]
0.510802	-6.80938	1	2	1		5.23605	0	0.228966			-6.45	MP_top_ini	[cm]
0.552469	-6.91131	1	2	1		5.66138	0	0.181504			-3.9	MP_bot_ini	[cm]
0.594136	-7.01325	1	2	1		5.90556	0	0.167914			-2.65	BC-bot	[cm]
0.635802	-7.14577	1	2	1		6.13349	0	0.223751
0.677469	-7.22732	1	2	1		6.71218	0	0.18317
0.719136	-7.38022	1	2	1		6.92092	0	0.169595
0.767747	-7.53313	1	2	1		7.16822	0	0.164982
0.809414	-7.55352	1	2	1		7.7231	0	0.150662
0.858025	-7.65545	1	2	1		8.19827	0	0.16289
0.899691	-7.7472	1	2	1		8.7522	0	0.195332
0.941358	-7.81855	1	2	1		8.91773	0	0.207812
0.983025	-7.96126	1	2	1		9.14272	0	0.224011
1.03164	-8.01223	1	2	1		9.76253	0	0.227488
1.0733	-8.05301	1	2	1		10.0949	0	0.222034
1.11497	-8.04281	1	2	1		10.5946	0	0.231333
1.15664	-8.18552	1	2	1		11.2215	0	0.239618
1.1983	-8.28746	1	2	1		11.7114	0	0.232267
1.24691	-8.25688	1	2	1		11.9043	0	0.208417
1.28858	-8.48114	1	2	1		12.1201	0	0.202957
1.33025	-8.5525	1	2	1		12.7093	0	0.218276
1.37886	-8.7054	1	2	1		12.9093	0	0.219913
1.42052	-8.75637	1	2	1		13.1813	0	0.221352
1.46219	-8.75637	1	2	1		13.7005	0	0.21805
1.5108	-8.90928	1	2	1		13.8925	0	0.209286
1.55247	-8.96024	1	2	1		14.1205	0	0.208832
1.59414	-9.06218	1	2	1		14.7513	0	0.21495
1.6358	-9.17431	1	2	1		15.0601	0	0.203996
1.68441	-9.21509	1	2	1		15.1746	0	0.193953
1.72608	-9.27625	1	2	1		15.7452	0	0.164741
1.76775	-9.29664	1	2	1		15.898	0	0.141354
1.80941	-9.36799	1	2	1		16.1811	0	0.140582
1.85108	-9.41896	1	2	1		16.7623	0	0.120098
1.89275	-9.48012	1	2	1		16.9919	0	0.10191
1.93441	-9.5107	1	2	1		17.1817	0	0.096965
1.97608	-9.64322	1	2	1		17.7592	0	0.0862385
2.01775	-9.73496	1	2	1		18.1998	0	0.0798803
2.05941	-9.81651	1	2	1		18.7144	0	0.0757878
2.10802	-9.88787	1	2	1		19.0118	0	0.0692585
2.15664	-10.0204	1	2	1		19.2948	0	0.0692722
2.20525	-9.89806	1	2	1		19.6908	0	0.0717204
2.24691	-10.0815	1	2	1		20.167	0	0.071818
2.28858	-10.2141	1	2	1		20.7026	0	0.073929
2.33025	-10.3466	1	2	1		21.23	0	0.0667408
2.37191	-10.4587	1	2	1		21.7281	0	0.0582231
2.41358	-10.5301	1	2	1		21.9719	0	0.0590573
2.45525	-10.6422	1	2	1		22.101	0	0.0619981
2.49691	-10.6728	1	2	1		22.7414	0	0.0543413
2.53858	-10.7645	1	2	1		22.9132	0	0.0547218
2.58025	-10.8563	1	2	1		23.1218	0	0.0507956
2.62191	-10.9276	1	2	1		23.8274	0	0.0510212
2.66358	-11.0092	1	2	1		24.1634	0	0.0535756
2.71219	-11.0296	1	2	1		24.8353	0	0.0506015
2.7608	-11.1009	1	2	1		25.2966	0	0.0511624
2.80247	-11.2029	1	2	1		25.7192	0	0.0506421
2.84414	-11.264	1	2	1		26.1008	0	0.0492651
2.8858	-11.3354	1	2	1		26.6954	0	0.0484376
2.92747	-11.3863	1	2	1		27.0688	0	0.0428428
2.96914	-11.4679	1	2	1		27.7363	0	0.041051
3.0108	-11.2029	1	2	1		28.6683	0	0.035191
3.05941	-11.5596	1	2	1		29.748	0	0.035191
3.10108	-11.6514	1	2	1
3.14275	-11.7431	1	2	1
3.18441	-11.8145	1	2	1
3.23302	-11.947	1	2	1
3.28164	-11.58	1	2	1
3.33025	-11.7839	1	2	1
3.37191	-11.9062	1	2	1
3.41358	-11.9878	1	2	1
3.45525	-12.0999	1	2	1
3.49691	-12.1611	1	2	1
3.53858	-12.263	1	2	1
3.58025	-12.3445	1	2	1
3.62191	-12.4057	1	2	1
3.66358	-12.4873	1	2	1
3.70525	-12.5688	1	2	1
3.74691	-12.6402	1	2	1
3.78858	-12.7013	1	2	1
3.83719	-12.8135	1	2	1
3.87886	-12.9154	1	2	1
3.92052	-12.9867	1	2	1
3.96219	-13.0683	1	2	1
4.0108	-13.16	1	2	1
4.05247	-13.262	1	2	1
4.09414	-13.3129	1	2	1
4.1358	-13.3843	1	2	1
4.17747	-13.4659	1	2	1
4.21914	-13.1906	1	2	1
4.2608	-13.4964	1	2	1
4.30247	-13.5882	1	2	1
4.34414	-13.6901	1	2	1
4.3858	-13.7615	1	2	1
4.42747	-13.843	1	2	1
4.46914	-13.9042	1	2	1
4.5108	-13.9755	1	2	1
4.55247	-14.0571	1	2	1
4.59414	-14.1081	1	2	1
4.6358	-14.1896	1	2	1
4.67747	-14.2508	1	2	1
4.71914	-14.3425	1	2	1
4.7608	-14.2813	1	2	1
4.80247	-14.4139	1	2	1
4.84414	-14.4852	1	2	1
4.8858	-14.5158	1	2	1
4.92747	-14.5973	1	2	1
4.96914	-14.6789	1	2	1
5.0108	-14.7604	1	2	1
5.05247	-14.8624	1	2	1
5.09414	-14.9643	1	2	1
5.1358	-15.0459	1	2	1
5.17747	-15.1478	1	2	1
5.21914	-15.2803	1	2	1
5.2608	-15.3313	1	2	1
5.30247	-15.4128	1	2	1
5.34414	-15.5148	1	2	1
5.3858	-15.5759	1	2	1
5.42747	-15.6677	1	2	1
5.46914	-15.7288	1	2	1
5.5108	-15.79	1	2	1
5.55247	-15.8716	1	2	1
5.59414	-15.9327	1	2	1
5.6358	-15.9939	1	2	1
5.67747	-16.0347	1	2	1
5.71914	-16.0652	1	2	1
5.7608	-16.1162	1	2	1
5.80247	-16.1774	1	2	1
5.84414	-16.2487	1	2	1
5.8858	-16.2895	1	2	1
5.92747	-16.2691	1	2	1
5.96914	-16.4118	1	2	1
6.0108	-16.5341	1	2	1
6.05247	-16.6361	1	2	1
6.09414	-16.7584	1	2	1
6.1358	-16.1162	1	2	1
6.18441	-16.7992	1	2	1
6.22608	-16.9317	1	2	1
6.26775	-17.0642	1	2	1
6.30941	-17.1356	1	2	1
6.35108	-17.2273	1	2	1
6.39275	-17.3191	1	2	1
6.43441	-17.3802	1	2	1
6.47608	-17.472	1	2	1
6.51775	-17.5433	1	2	1
6.55941	-17.6045	1	2	1
6.60108	-17.7064	1	2	1
6.64275	-17.737	1	2	1
6.68441	-17.7982	1	2	1
6.72608	-17.788	1	2	1
6.76775	-17.9613	1	2	1
6.80941	-18.0632	1	2	1
6.85108	-18.1346	1	2	1
6.89275	-18.1957	1	2	1
6.93441	-18.2161	1	2	1
6.97608	-18.318	1	2	1
7.01775	-18.4098	1	2	1
7.05941	-18.5015	1	2	1
7.10108	-18.5729	1	2	1
7.14275	-18.6442	1	2	1
7.18441	-18.736	1	2	1
7.22608	-18.7768	1	2	1
7.26775	-18.8277	1	2	1
7.30941	-18.9195	1	2	1
7.35802	-19.0112	1	2	1
7.39969	-19.001	1	2	1
7.44136	-19.0826	1	2	1
7.48302	-19.1437	1	2	1
7.52469	-19.2253	1	2	1
7.56636	-19.2966	1	2	1
7.60802	-19.3476	1	2	1
7.64969	-19.419	1	2	1
7.69136	-19.4801	1	2	1
7.73302	-19.3374	1	2	1
7.77469	-19.6126	1	2	1
7.81636	-19.6534	1	2	1
7.85802	-19.7146	1	2	1
7.89969	-19.8165	1	2	1
7.94136	-19.9083	1	2	1
7.98302	-20.0102	1	2	1
8.02469	-20.0917	1	2	1
8.06636	-20.1733	1	2	1
8.10802	-20.265	1	2	1
8.14969	-20.3568	1	2	1
8.19136	-20.4689	1	2	1
8.23302	-20.5505	1	2	1
8.27469	-20.6626	1	2	1
8.31636	-20.7747	1	2	1
8.35802	-20.8665	1	2	1
8.39969	-20.948	1	2	1
8.44136	-21.0398	1	2	1
8.48302	-21.1315	1	2	1
8.52469	-21.2436	1	2	1
8.56636	-21.3456	1	2	1
8.60802	-21.4679	1	2	1
8.64969	-21.5902	1	2	1
8.69136	-21.6922	1	2	1
8.73302	-21.8247	1	2	1
8.77469	-21.9776	1	2	1
8.81636	-22.0591	1	2	1
8.85802	-22.1916	1	2	1
8.89969	-22.3344	1	2	1
8.94136	-22.4159	1	2	1
8.98302	-22.5892	1	2	1
9.02469	-22.7115	1	2	1
9.06636	-22.8644	1	2	1
9.10802	-23.0173	1	2	1
9.14969	-22.9154	1	2	1
9.19136	-23.3028	1	2	1
9.23302	-23.4455	1	2	1
9.27469	-23.5984	1	2	1
9.31636	-23.7207	1	2	1
9.35802	-23.8736	1	2	1
9.39969	-24.0061	1	2	1
9.44136	-24.1488	1	2	1
9.48302	-24.3119	1	2	1
9.52469	-24.4648	1	2	1
9.56636	-24.6075	1	2	1
9.60802	-24.7604	1	2	1
9.64969	-24.893	1	2	1
9.69136	-25.0663	1	2	1
9.73302	-25.2497	1	2	1
9.78164	-25.4027	1	2	1
9.8233	-25.6065	1	2	1
9.86497	-25.8002	1	2	1
9.90664	-25.9531	1	2	1
9.9483	-26.106	1	2	1
9.98997	-26.2793	1	2	1
10.0316	-26.473	1	2	1
10.0733	-26.6667	1	2	1
10.1219	-26.789	1	2	1
10.1636	-27.0438	1	2	1
10.2052	-27.2579	1	2	1
10.2469	-27.4312	1	2	1
10.2886	-27.6147	1	2	1
10.3302	-27.8287	1	2	1
10.3719	-28.0428	1	2	1
10.4136	-28.2263	1	2	1
10.4552	-28.4404	1	2	1
10.4969	-28.7054	1	2	1
10.5386	-28.9501	1	2	1
10.5802	-29.1845	1	2	1
10.6219	-29.4088	1	2	1
10.6636	-29.7146	1	2	1
10.7052	-29.9898	1	2	1
10.7469	-30.2752	1	2	1
10.7886	-30.5505	1	2	1
10.8302	-30.8257	1	2	1
10.8719	-31.1111	1	2	1
10.9136	-31.3863	1	2	1
10.9552	-31.7023	1	2	1
10.9969	-31.998	1	2	1
11.0386	-32.3242	1	2	1
11.0802	-32.63	1	2	1
11.1219	-32.9562	1	2	1
11.1636	-33.2824	1	2	1
11.2052	-33.6391	1	2	1
11.2469	-33.9144	1	2	1
11.2886	-34.2508	1	2	1
11.3302	-34.6585	1	2	1
11.3719	-34.9949	1	2	1
11.4136	-35.3721	1	2	1
11.4552	-35.739	1	2	1
11.4969	-36.1468	1	2	1
11.5386	-36.5647	1	2	1
11.5802	-36.9827	1	2	1
11.6219	-37.3904	1	2	1
11.6636	-37.8491	1	2	1
11.7052	-38.2263	1	2	1
11.7469	-38.6748	1	2	1
11.7886	-39.0826	1	2	1
11.8302	-39.5821	1	2	1
11.8719	-40.051	1	2	1
11.9136	-40.4383	1	2	1
11.9552	-40.9786	1	2	1
11.9969	-41.4781	1	2	1
12.0386	-41.9368	1	2	1
12.0802	-42.4771	1	2	1
12.1219	-42.9358	1	2	1
12.1636	-43.5678	1	2	1
12.2122	-44.261	1	2	1
12.2608	-45.0255	1	2	1
12.3025	-45.6575	1	2	1
12.3441	-46.4526	1	2	1
12.3858	-47.1865	1	2	1
12.4275	-47.9511	1	2	1
12.4691	-48.7258	1	2	1
12.5108	-49.5617	1	2	1
12.5594	-50.5607	1	2	1
12.6011	-51.5087	1	2	1
12.6427	-52.4975	1	2	1
12.6844	-53.476	1	2	1
12.7261	-54.4954	1	2	1
12.7677	-55.5657	1	2	1
12.8094	-56.6667	1	2	1
12.8511	-57.7166	1	2	1
12.8927	-58.8277	1	2	1
12.9344	-60.0408	1	2	1
12.9761	-61.4169	1	2	1
13.0177	-62.8746	1	2	1
13.0594	-64.1794	1	2	1
13.1011	-65.8002	1	2	1
13.1427	-67.37	1	2	1
13.1844	-68.6544	1	2	1
13.2261	-70.632	1	2	1
13.2677	-72.3445	1	2	1
13.3094	-74.1284	1	2	1
13.3511	-76.0041	1	2	1
13.3927	-77.9613	1	2	1
13.4344	-79.8369	1	2	1
13.4761	-81.7431	1	2	1
13.5177	-83.6799	1	2	1
13.5664	-85.9633	1	2	1
13.608	-87.8593	1	2	1
13.6497	-89.7248	1	2	1
13.6914	-91.4985	1	2	1
13.733	-93.1295	1	2	1
13.7747	-95.3925	1	2	1
13.8164	-97.3598	1	2	1
13.858	-99.3476	1	2	1
13.8997	-101.376	1	2	1
13.9414	-103.405	1	2	1
13.983	-105.474	1	2	1
14.0247	-107.655	1	2	1
14.0664	-109.776	1	2	1
14.108	-112.018	1	2	1
14.1566	-114.404	1	2	1
14.1983	-116.789	1	2	1
14.24	-119.113	1	2	1
14.2816	-121.631	1	2	1
14.3302	-124.577	1	2	1
14.3719	-126.942	1	2	1
14.4136	-129.307	1	2	1
14.4552	-131.672	1	2	1
14.4969	-134.006	1	2	1
14.5386	-136.218	1	2	1
14.5802	-138.318	1	2	1
14.6219	-140.285	1	2	1
14.6636	-142.09	1	2	1
14.7052	-143.782	1	2	1
14.7469	-145.423	1	2	1
14.8164	-147.176	1	2	1
14.858	-148.277	1	2	1
14.9066	-149.735	1	2	1
14.9483	-150.836	1	2	1
14.9969	-152.029	1	2	1
15.0386	-152.987	1	2	1
15.0802	-153.721	1	2	1
15.1219	-154.597	1	2	1
15.1636	-155.362	1	2	1
15.2122	-156.086	1	2	1
15.2539	-156.86	1	2	1
15.2955	-157.431	1	2	1
15.3372	-157.951	1	2	1
15.3789	-158.471	1	2	1
15.4205	-158.96	1	2	1
15.4622	-159.48	1	2	1
15.5039	-159.888	1	2	1
15.5455	-160.336	1	2	1
15.5872	-160.785	1	2	1
15.6289	-161.152	1	2	1
15.6705	-161.631	1	2	1
15.7261	-162.243	1	2	1
15.7677	-162.426	1	2	1
15.8094	-162.813	1	2	1
15.8511	-163.293	1	2	1
15.8927	-163.649	1	2	1
15.9344	-163.925	1	2	1
15.9761	-164.251	1	2	1
16.0177	-164.577	1	2	1
16.0594	-164.883	1	2	1
16.1011	-165.229	1	2	1
16.1427	-165.545	1	2	1
16.1844	-165.219	1	2	1
16.2261	-166.228	1	2	1
16.2677	-166.555	1	2	1
16.3094	-166.779	1	2	1
16.3511	-167.044	1	2	1
16.3927	-167.329	1	2	1
16.4344	-167.564	1	2	1
16.4761	-167.798	1	2	1
16.5177	-167.961	1	2	1
16.5594	-168.226	1	2	1
16.6011	-168.43	1	2	1
16.6427	-168.614	1	2	1
16.6914	-168.848	1	2	1
16.733	-169.113	1	2	1
16.7747	-169.327	1	2	1
16.8164	-169.613	1	2	1
16.858	-169.878	1	2	1
16.8997	-170.102	1	2	1
16.9414	-170.326	1	2	1
16.983	-170.55	1	2	1
17.0316	-170.673	1	2	1
17.0733	-170.928	1	2	1
17.115	-171.182	1	2	1
17.1566	-171.448	1	2	1
17.1983	-171.651	1	2	1
17.24	-171.988	1	2	1
17.2816	-172.192	1	2	1
17.3233	-172.334	1	2	1
17.365	-172.508	1	2	1
17.4066	-172.732	1	2	1
17.4483	-172.885	1	2	1
17.49	-173.119	1	2	1
17.5316	-173.293	1	2	1
17.5733	-173.496	1	2	1
17.615	-173.68	1	2	1
17.6566	-173.863	1	2	1
17.6983	-174.047	1	2	1
17.74	-174.251	1	2	1
17.7816	-174.383	1	2	1
17.8233	-174.679	1	2	1
17.865	-174.913	1	2	1
17.9066	-175.087	1	2	1
17.9483	-175.331	1	2	1
17.99	-175.545	1	2	1
18.0316	-175.719	1	2	1
18.0733	-175.882	1	2	1
18.115	-176.004	1	2	1
18.1566	-176.239	1	2	1
18.2052	-175.933	1	2	1
18.2469	-176.544	1	2	1
18.2886	-176.697	1	2	1
18.3302	-176.789	1	2	1
18.3719	-177.003	1	2	1
18.4136	-177.115	1	2	1
18.4552	-177.248	1	2	1
18.4969	-177.431	1	2	1
18.5386	-177.594	1	2	1
18.5802	-177.88	1	2	1
18.6219	-178.022	1	2	1
18.6636	-178.186	1	2	1
18.7052	-178.359	1	2	1
18.7469	-178.491	1	2	1
18.7886	-178.746	1	2	1
18.8302	-178.909	1	2	1
18.8719	-179.164	1	2	1
18.9136	-179.327	1	2	1
18.9552	-179.592	1	2	1
18.9969	-179.745	1	2	1
19.0386	-179.857	1	2	1
19.0802	-180.173	1	2	1
19.1219	-180.347	1	2	1
19.1636	-180.581	1	2	1
19.2052	-180.734	1	2	1
19.2539	-180.928	1	2	1
19.3025	-180.408	1	2	1
19.3441	-181.233	1	2	1
19.3858	-181.529	1	2	1
19.4275	-181.794	1	2	1
19.4691	-181.998	1	2	1
19.5108	-182.243	1	2	1
19.5525	-182.508	1	2	1
19.5941	-182.691	1	2	1
19.6358	-182.915	1	2	1
19.6775	-183.16	1	2	1
19.7191	-183.272	1	2	1
19.7608	-183.333	1	2	1
19.8025	-183.456	1	2	1
19.8441	-183.619	1	2	1
19.8858	-183.843	1	2	1
19.9275	-184.077	1	2	1
19.9691	-184.353	1	2	1
20.0108	-184.791	1	2	1
20.0525	-185.046	1	2	1
20.1011	-185.087	1	2	1
20.1427	-185.362	1	2	1
20.1844	-185.036	1	2	1
20.2261	-185.443	1	2	1
20.2747	-185.719	1	2	1
20.3164	-185.943	1	2	1
20.358	-186.239	1	2	1
20.3997	-186.483	1	2	1
20.4414	-186.748	1	2	1
20.483	-187.044	1	2	1
20.5247	-187.319	1	2	1
20.5664	-187.625	1	2	1
20.608	-187.9	1	2	1
20.6497	-188.206	1	2	1
20.6914	-188.502	1	2	1
20.733	-188.614	1	2	1
20.7747	-188.736	1	2	1
20.8164	-188.879	1	2	1
20.858	-189.052	1	2	1
20.8997	-189.827	1	2	1
20.9414	-190.204	1	2	1
20.983	-190.387	1	2	1
21.0247	-190.561	1	2	1
21.0664	-190.489	1	2	1
21.108	-190.765	1	2	1
21.1497	-191.07	1	2	1
21.1914	-191.407	1	2	1
21.233	-188.053	1	2	1
21.2816	-192.406	1	2	1
21.3233	-192.732	1	2	1
21.365	-193.038	1	2	1
21.4066	-193.435	1	2	1
21.4483	-193.629	1	2	1
21.49	-193.955	1	2	1
21.5316	-194.108	1	2	1
21.5733	-194.526	1	2	1
21.615	-194.699	1	2	1
21.6566	-194.893	1	2	1
21.6983	-195.066	1	2	1
21.74	-195.117	1	2	1
21.7816	-195.79	1	2	1
21.8233	-196.014	1	2	1
21.865	-196.198	1	2	1
21.9066	-196.402	1	2	1
21.9483	-196.555	1	2	1
21.99	-195.362	1	2	1
22.0316	-196.86	1	2	1
22.0733	-197.023	1	2	1
22.115	-197.38	1	2	1
22.1566	-198.012	1	2	1
22.1983	-198.532	1	2	1
22.24	-199.021	1	2	1
22.2816	-199.348	1	2	1
22.3233	-199.755	1	2	1
22.365	-200.02	1	2	1
22.4066	-200.367	1	2	1
22.4483	-200.815	1	2	1
22.5108	-201.448	1	2	1
22.5386	-201.825	1	2	1
22.5802	-202.171	1	2	1
22.6219	-202.467	1	2	1
22.6636	-202.712	1	2	1
22.7052	-203.017	1	2	1
22.7469	-200.846	1	2	1
22.7886	-203.547	1	2	1
22.8372	-204.016	1	2	1
22.8789	-204.444	1	2	1
22.9275	-204.516	1	2	1
22.9691	-205.046	1	2	1
23.0177	-205.586	1	2	1
23.0594	-206.147	1	2	1
23.1011	-206.606	1	2	1
23.1427	-206.922	1	2	1
23.1844	-207.676	1	2	1
23.233	-208.206	1	2	1
23.2747	-209.093	1	2	1
23.3164	-209.011	1	2	1
23.358	-209.837	1	2	1
23.3997	-210.418	1	2	1
23.4414	-210.958	1	2	1
23.483	-211.427	1	2	1
23.5247	-211.886	1	2	1
23.5664	-212.314	1	2	1
23.608	-212.926	1	2	1
23.6497	-213.588	1	2	1
23.6914	-214.037	1	2	1
23.733	-214.689	1	2	1
23.7747	-215.189	1	2	1
23.8164	-215.678	1	2	1
23.858	-215.586	1	2	1
23.8997	-216.167	1	2	1
23.9414	-216.922	1	2	1
23.983	-217.645	1	2	1
24.0247	-218.094	1	2	1
24.0664	-218.675	1	2	1
24.108	-219.602	1	2	1
24.1497	-220.673	1	2	1
24.1914	-221.743	1	2	1
24.233	-222.722	1	2	1
24.2747	-223.537	1	2	1
24.3164	-224.75	1	2	1
24.358	-225.464	1	2	1
24.3997	-226.483	1	2	1
24.4483	-227.39	1	2	1
24.49	-228.461	1	2	1
24.5316	-229.113	1	2	1
24.5733	-230.428	1	2	1
24.615	-231.335	1	2	1
24.6636	-232.059	1	2	1
24.7052	-232.834	1	2	1
24.7469	-234.587	1	2	1
24.7886	-235.209	1	2	1
24.8302	-237.319	1	2	1
24.8719	-238.186	1	2	1
24.9136	-239.592	1	2	1
24.9552	-241.081	1	2	1
24.9969	-242.345	1	2	1
25.0386	-243.976	1	2	1
25.0802	-246.218	1	2	1
25.1219	-248.267	1	2	1
25.1636	-250.693	1	2	1
25.2052	-253.303	1	2	1
25.2469	-255.556	1	2	1
25.2886	-257.635	1	2	1
25.3302	-260.071	1	2	1
25.3719	-262.661	1	2	1
25.4136	-265.24	1	2	1
25.4552	-268.124	1	2	1
25.4969	-272.161	1	2	1
25.5386	-275.505	1	2	1
25.5802	-277.819	1	2	1
25.6219	-281.57	1	2	1
25.6636	-286.871	1	2	1
25.7122	-291.896	1	2	1
25.7539	-297.839	1	2	1
25.7955	-304.485	1	2	1
25.8372	-311.906	1	2	1
25.8789	-319.011	1	2	1
25.9205	-325.627	1	2	1
25.9622	-333.282	1	2	1
26.0039	-341.458	1	2	1
26.0455	-351.019	1	2	1
26.0872	-363.242	1	2	1
26.1289	-377.023	1	2	1
26.1705	-396.555	1	2	1
26.2122	-415.902	1	2	1
26.2539	-438.063	1	2	1
26.2955	-459.358	1	2	1
26.3372	-484.913	1	2	1
26.3789	-509.674	1	2	1
26.4205	-547.441	1	2	1
26.4622	-573.629	1	2	1
26.5039	-621.855	1	2	1
26.5455	-656.279	1	2	1
26.5872	-721.009	1	2	1
26.6289	-782.141	1	2	1
26.6705	-893.955	1	2	1
26.7122	-943.976	1	2	1
26.7469	-980.683	1	2	1
26.7747	-1053.31	1	2	1
29.7469	-8970.44	1	2	1
0.0108024	-6.62589	1	1	1
0.0524691	-7.13558	1	1	1
0.0941357	-7.40061	1	1	1
0.135802	-7.60449	1	1	1
0.177469	-7.85933	1	1	1
0.219136	-8.13456	1	1	1
0.260802	-8.40979	1	1	1
0.302469	-8.3792	1	1	1
0.344136	-8.65443	1	1	1
0.385802	-8.85831	1	1	1
0.427469	-9.06218	1	1	1
0.469136	-9.15392	1	1	1
0.510802	-9.31702	1	1	1
0.552469	-9.43935	1	1	1
0.594136	-9.53109	1	1	1
0.635802	-9.6738	1	1	1
0.677469	-9.76555	1	1	1
0.719136	-9.89806	1	1	1
0.767747	-10.0612	1	1	1
0.809414	-10.0917	1	1	1
0.858025	-10.1937	1	1	1
0.899691	-10.2956	1	1	1
0.941358	-10.3568	1	1	1
0.983025	-10.4995	1	1	1
1.03164	-10.5607	1	1	1
1.0733	-10.6014	1	1	1
1.11497	-10.581	1	1	1
1.15664	-10.7238	1	1	1
1.1983	-10.8359	1	1	1
1.24691	-10.8155	1	1	1
1.28858	-11.0194	1	1	1
1.33025	-11.0805	1	1	1
1.37886	-11.2334	1	1	1
1.42052	-11.2946	1	1	1
1.46219	-11.2844	1	1	1
1.5108	-11.4373	1	1	1
1.55247	-11.4883	1	1	1
1.59414	-11.5902	1	1	1
1.6358	-11.7023	1	1	1
1.68441	-11.7431	1	1	1
1.72608	-11.8043	1	1	1
1.76775	-11.8145	1	1	1
1.80941	-11.8756	1	1	1
1.85108	-11.9368	1	1	1
1.89275	-12.0082	1	1	1
1.93441	-12.0285	1	1	1
1.97608	-12.1611	1	1	1
2.01775	-12.2528	1	1	1
2.05941	-12.3445	1	1	1
2.10802	-12.4159	1	1	1
2.15664	-12.5382	1	1	1
2.20525	-12.4363	1	1	1
2.24691	-12.5994	1	1	1
2.28858	-12.7319	1	1	1
2.33025	-12.8746	1	1	1
2.37191	-12.9766	1	1	1
2.41358	-13.0581	1	1	1
2.45525	-13.16	1	1	1
2.49691	-13.1804	1	1	1
2.53858	-13.2926	1	1	1
2.58025	-13.3741	1	1	1
2.62191	-13.4455	1	1	1
2.66358	-13.527	1	1	1
2.71219	-13.5372	1	1	1
2.7608	-13.6188	1	1	1
2.80247	-13.7003	1	1	1
2.84414	-13.7819	1	1	1
2.8858	-13.8532	1	1	1
2.92747	-13.8634	1	1	1
2.96914	-13.9755	1	1	1
3.0108	-13.7207	1	1	1
3.05941	-14.0571	1	1	1
3.10108	-14.1488	1	1	1
3.14275	-14.2406	1	1	1
3.18441	-14.3221	1	1	1
3.23302	-14.4037	1	1	1
3.28164	-14.0571	1	1	1
3.33025	-14.2712	1	1	1
3.37191	-14.3935	1	1	1
3.41358	-14.475	1	1	1
3.45525	-14.5668	1	1	1
3.49691	-14.6483	1	1	1
3.53858	-14.7401	1	1	1
3.58025	-14.8318	1	1	1
3.62191	-14.893	1	1	1
3.66358	-14.9643	1	1	1
3.70525	-15.0357	1	1	1
3.74691	-15.1274	1	1	1
3.78858	-15.1988	1	1	1
3.83719	-15.2905	1	1	1
3.87886	-15.3721	1	1	1
3.92052	-15.4638	1	1	1
3.96219	-15.5352	1	1	1
4.0108	-15.6371	1	1	1
4.05247	-15.6983	1	1	1
4.09414	-15.79	1	1	1
4.1358	-15.8614	1	1	1
4.17747	-15.9225	1	1	1
4.21914	-15.6983	1	1	1
4.2608	-15.9735	1	1	1
4.30247	-16.0652	1	1	1
4.34414	-16.1468	1	1	1
4.3858	-16.2283	1	1	1
4.42747	-16.2997	1	1	1
4.46914	-16.371	1	1	1
4.5108	-16.4526	1	1	1
4.55247	-16.524	1	1	1
4.59414	-16.5749	1	1	1
4.6358	-16.6667	1	1	1
4.67747	-16.7278	1	1	1
4.71914	-16.8094	1	1	1
4.7608	-16.7686	1	1	1
4.80247	-16.8807	1	1	1
4.84414	-16.9419	1	1	1
4.8858	-16.9827	1	1	1
4.92747	-17.0744	1	1	1
4.96914	-17.1254	1	1	1
5.0108	-17.2069	1	1	1
5.05247	-17.2885	1	1	1
5.09414	-17.3904	1	1	1
5.1358	-17.4924	1	1	1
5.17747	-17.6045	1	1	1
5.21914	-17.7166	1	1	1
5.2608	-17.7472	1	1	1
5.30247	-17.8593	1	1	1
5.34414	-17.9511	1	1	1
5.3858	-18.0326	1	1	1
5.42747	-18.104	1	1	1
5.46914	-18.1651	1	1	1
5.5108	-18.2365	1	1	1
5.55247	-18.2977	1	1	1
5.59414	-18.369	1	1	1
5.6358	-18.4302	1	1	1
5.67747	-18.4913	1	1	1
5.71914	-18.5117	1	1	1
5.7608	-18.5525	1	1	1
5.80247	-18.6137	1	1	1
5.84414	-18.685	1	1	1
5.8858	-18.7258	1	1	1
5.92747	-18.6952	1	1	1
5.96914	-18.8379	1	1	1
6.0108	-18.9501	1	1	1
6.05247	-19.0724	1	1	1
6.09414	-19.1539	1	1	1
6.1358	-18.5831	1	1	1
6.18441	-19.2355	1	1	1
6.22608	-19.3884	1	1	1
6.26775	-19.5107	1	1	1
6.30941	-19.5923	1	1	1
6.35108	-19.684	1	1	1
6.39275	-19.7757	1	1	1
6.43441	-19.8471	1	1	1
6.47608	-19.9286	1	1	1
6.51775	-20	1	1	1
6.55941	-20.0714	1	1	1
6.60108	-20.1427	1	1	1
6.64275	-20.1835	1	1	1
6.68441	-20.2446	1	1	1
6.72608	-20.2345	1	1	1
6.76775	-20.4077	1	1	1
6.80941	-20.4791	1	1	1
6.85108	-20.5708	1	1	1
6.89275	-20.6422	1	1	1
6.93441	-20.6728	1	1	1
6.97608	-20.7645	1	1	1
7.01775	-20.8359	1	1	1
7.05941	-20.9276	1	1	1
7.10108	-20.9888	1	1	1
7.14275	-21.0601	1	1	1
7.18441	-21.1519	1	1	1
7.22608	-21.1825	1	1	1
7.26775	-21.2538	1	1	1
7.30941	-21.3354	1	1	1
7.35802	-21.3965	1	1	1
7.39969	-21.4271	1	1	1
7.44136	-21.5087	1	1	1
7.48302	-21.5698	1	1	1
7.52469	-21.6412	1	1	1
7.56636	-21.6922	1	1	1
7.60802	-21.7635	1	1	1
7.64969	-21.8247	1	1	1
7.69136	-21.896	1	1	1
7.73302	-21.7533	1	1	1
7.77469	-22.0082	1	1	1
7.81636	-22.0591	1	1	1
7.85802	-22.1305	1	1	1
7.89969	-22.212	1	1	1
7.94136	-22.3038	1	1	1
7.98302	-22.4057	1	1	1
8.02469	-22.4975	1	1	1
8.06636	-22.5688	1	1	1
8.10802	-22.6504	1	1	1
8.14969	-22.7523	1	1	1
8.19136	-22.8236	1	1	1
8.23302	-22.9562	1	1	1
8.27469	-23.0479	1	1	1
8.31636	-23.16	1	1	1
8.35802	-23.2518	1	1	1
8.39969	-23.3537	1	1	1
8.44136	-23.4659	1	1	1
8.48302	-23.5576	1	1	1
8.52469	-23.6493	1	1	1
8.56636	-23.7615	1	1	1
8.60802	-23.8838	1	1	1
8.64969	-23.9959	1	1	1
8.69136	-24.1081	1	1	1
8.73302	-24.2202	1	1	1
8.77469	-24.3833	1	1	1
8.81636	-24.475	1	1	1
8.85802	-24.5973	1	1	1
8.89969	-24.7401	1	1	1
8.94136	-24.842	1	1	1
8.98302	-24.9745	1	1	1
9.02469	-25.1376	1	1	1
9.06636	-25.2803	1	1	1
9.10802	-25.4332	1	1	1
9.14969	-25.3415	1	1	1
9.19136	-25.7187	1	1	1
9.23302	-25.841	1	1	1
9.27469	-26.0041	1	1	1
9.31636	-26.1468	1	1	1
9.35802	-26.2997	1	1	1
9.39969	-26.4322	1	1	1
9.44136	-26.5851	1	1	1
9.48302	-26.7278	1	1	1
9.52469	-26.8909	1	1	1
9.56636	-27.0438	1	1	1
9.60802	-27.1967	1	1	1
9.64969	-27.3394	1	1	1
9.69136	-27.4924	1	1	1
9.73302	-27.6656	1	1	1
9.78164	-27.8084	1	1	1
9.8233	-28.0122	1	1	1
9.86497	-28.1855	1	1	1
9.90664	-28.3486	1	1	1
9.9483	-28.5015	1	1	1
9.98997	-28.6748	1	1	1
10.0316	-28.8583	1	1	1
10.0733	-29.0622	1	1	1
10.1219	-29.2355	1	1	1
10.1636	-29.419	1	1	1
10.2052	-29.633	1	1	1
10.2469	-29.8063	1	1	1
10.2886	-30	1	1	1
10.3302	-30.2345	1	1	1
10.3719	-30.4383	1	1	1
10.4136	-30.6524	1	1	1
10.4552	-30.8665	1	1	1
10.4969	-31.0805	1	1	1
10.5386	-31.3354	1	1	1
10.5802	-31.5902	1	1	1
10.6219	-31.8451	1	1	1
10.6636	-32.1407	1	1	1
10.7052	-32.4261	1	1	1
10.7469	-32.6911	1	1	1
10.7886	-32.9766	1	1	1
10.8302	-33.262	1	1	1
10.8719	-33.527	1	1	1
10.9136	-33.8022	1	1	1
10.9552	-34.0979	1	1	1
10.9969	-34.4139	1	1	1
11.0386	-34.7095	1	1	1
11.0802	-35.0561	1	1	1
11.1219	-35.3823	1	1	1
11.1636	-35.6983	1	1	1
11.2052	-36.0652	1	1	1
11.2469	-36.3609	1	1	1
11.2886	-36.6972	1	1	1
11.3302	-37.0846	1	1	1
11.3719	-37.4414	1	1	1
11.4136	-37.788	1	1	1
11.4552	-38.1753	1	1	1
11.4969	-38.5831	1	1	1
11.5386	-38.9399	1	1	1
11.5802	-39.4088	1	1	1
11.6219	-39.8267	1	1	1
11.6636	-40.2548	1	1	1
11.7052	-40.6728	1	1	1
11.7469	-41.1111	1	1	1
11.7886	-41.5087	1	1	1
11.8302	-42.0082	1	1	1
11.8719	-42.4567	1	1	1
11.9136	-42.8542	1	1	1
11.9552	-43.3843	1	1	1
11.9969	-43.8838	1	1	1
12.0386	-44.3731	1	1	1
12.0802	-44.8828	1	1	1
12.1219	-45.3619	1	1	1
12.1636	-46.0143	1	1	1
12.2122	-46.6972	1	1	1
12.2608	-47.4516	1	1	1
12.3025	-48.1244	1	1	1
12.3441	-48.8481	1	1	1
12.3858	-49.6432	1	1	1
12.4275	-50.4077	1	1	1
12.4691	-51.2029	1	1	1
12.5108	-52.0285	1	1	1
12.5594	-53.0071	1	1	1
12.6011	-53.9755	1	1	1
12.6427	-54.9235	1	1	1
12.6844	-55.9531	1	1	1
12.7261	-56.9623	1	1	1
12.7677	-58.0122	1	1	1
12.8094	-59.1335	1	1	1
12.8511	-60.2039	1	1	1
12.8927	-61.3252	1	1	1
12.9344	-62.5076	1	1	1
12.9761	-63.9042	1	1	1
13.0177	-65.3415	1	1	1
13.0594	-66.6871	1	1	1
13.1011	-68.318	1	1	1
13.1427	-69.8777	1	1	1
13.1844	-71.2232	1	1	1
13.2261	-73.1804	1	1	1
13.2677	-74.8624	1	1	1
13.3094	-76.6769	1	1	1
13.3511	-78.5831	1	1	1
13.3927	-80.4893	1	1	1
13.4344	-82.4261	1	1	1
13.4761	-84.3119	1	1	1
13.5177	-86.2691	1	1	1
13.5664	-88.5831	1	1	1
13.608	-90.4893	1	1	1
13.6497	-92.3649	1	1	1
13.6914	-94.21	1	1	1
13.733	-96.1264	1	1	1
13.7747	-98.053	1	1	1
13.8164	-100.071	1	1	1
13.858	-102.029	1	1	1
13.8997	-104.098	1	1	1
13.9414	-106.106	1	1	1
13.983	-108.247	1	1	1
14.0247	-110.469	1	1	1
14.0664	-112.559	1	1	1
14.108	-114.822	1	1	1
14.1566	-117.329	1	1	1
14.1983	-119.704	1	1	1
14.24	-122.1	1	1	1
14.2816	-124.72	1	1	1
14.3302	-127.696	1	1	1
14.3719	-130.163	1	1	1
14.4136	-132.63	1	1	1
14.4552	-135.076	1	1	1
14.4969	-137.441	1	1	1
14.5386	-139.664	1	1	1
14.5802	-141.835	1	1	1
14.6219	-143.833	1	1	1
14.6636	-145.607	1	1	1
14.7052	-147.38	1	1	1
14.7469	-149.083	1	1	1
14.8164	-150.846	1	1	1
14.858	-152.018	1	1	1
14.9066	-153.415	1	1	1
14.9483	-154.495	1	1	1
14.9969	-155.739	1	1	1
15.0386	-156.677	1	1	1
15.0802	-157.523	1	1	1
15.1219	-158.349	1	1	1
15.1636	-159.103	1	1	1
15.2122	-159.837	1	1	1
15.2539	-160.601	1	1	1
15.2955	-161.172	1	1	1
15.3372	-161.702	1	1	1
15.3789	-162.161	1	1	1
15.4205	-162.671	1	1	1
15.4622	-163.129	1	1	1
15.5039	-163.578	1	1	1
15.5455	-164.027	1	1	1
15.5872	-164.455	1	1	1
15.6289	-164.862	1	1	1
15.6705	-165.27	1	1	1
15.7261	-165.902	1	1	1
15.7677	-166.065	1	1	1
15.8094	-166.453	1	1	1
15.8511	-166.911	1	1	1
15.8927	-167.258	1	1	1
15.9344	-167.543	1	1	1
15.9761	-167.839	1	1	1
16.0177	-168.165	1	1	1
16.0594	-168.522	1	1	1
16.1011	-168.889	1	1	1
16.1427	-169.185	1	1	1
16.1844	-169.256	1	1	1
16.2261	-169.796	1	1	1
16.2677	-170.173	1	1	1
16.3094	-170.428	1	1	1
16.3511	-170.693	1	1	1
16.3927	-170.999	1	1	1
16.4344	-171.244	1	1	1
16.4761	-171.519	1	1	1
16.5177	-171.682	1	1	1
16.5594	-172.008	1	1	1
16.6011	-172.232	1	1	1
16.6427	-172.457	1	1	1
16.6914	-172.752	1	1	1
16.733	-173.048	1	1	1
16.7747	-173.262	1	1	1
16.8164	-173.547	1	1	1
16.858	-173.863	1	1	1
16.8997	-174.149	1	1	1
16.9414	-174.434	1	1	1
16.983	-174.709	1	1	1
17.0316	-174.924	1	1	1
17.0733	-175.311	1	1	1
17.115	-175.678	1	1	1
17.1566	-176.024	1	1	1
17.1983	-176.33	1	1	1
17.24	-176.718	1	1	1
17.2816	-177.085	1	1	1
17.3233	-177.278	1	1	1
17.365	-177.594	1	1	1
17.4066	-177.961	1	1	1
17.4483	-178.216	1	1	1
17.49	-178.624	1	1	1
17.5316	-178.909	1	1	1
17.5733	-179.246	1	1	1
17.615	-179.592	1	1	1
17.6566	-179.929	1	1	1
17.6983	-180.306	1	1	1
17.74	-180.622	1	1	1
17.7816	-180.968	1	1	1
17.8233	-181.427	1	1	1
17.865	-181.825	1	1	1
17.9066	-182.263	1	1	1
17.9483	-182.681	1	1	1
17.99	-182.987	1	1	1
18.0316	-183.466	1	1	1
18.0733	-183.925	1	1	1
18.115	-184.292	1	1	1
18.1566	-184.76	1	1	1
18.2052	-184.455	1	1	1
18.2469	-185.556	1	1	1
18.2886	-185.994	1	1	1
18.3302	-186.391	1	1	1
18.3719	-186.871	1	1	1
18.4136	-187.299	1	1	1
18.4552	-187.757	1	1	1
18.4969	-188.216	1	1	1
18.5386	-188.736	1	1	1
18.5802	-189.358	1	1	1
18.6219	-189.857	1	1	1
18.6636	-190.377	1	1	1
18.7052	-190.948	1	1	1
18.7469	-191.427	1	1	1
18.7886	-192.09	1	1	1
18.8302	-192.681	1	1	1
18.8719	-193.394	1	1	1
18.9136	-193.996	1	1	1
18.9552	-194.689	1	1	1
18.9969	-195.392	1	1	1
19.0386	-195.963	1	1	1
19.0802	-196.707	1	1	1
19.1219	-197.441	1	1	1
19.1636	-198.257	1	1	1
19.2052	-199.021	1	1	1
19.2539	-199.949	1	1	1
19.3025	-200.082	1	1	1
19.3441	-201.509	1	1	1
19.3858	-202.416	1	1	1
19.4275	-203.466	1	1	1
19.4691	-204.424	1	1	1
19.5108	-205.423	1	1	1
19.5525	-206.432	1	1	1
19.5941	-207.492	1	1	1
19.6358	-208.043	1	1	1
19.6775	-209.572	1	1	1
19.7191	-210.459	1	1	1
19.7608	-211.468	1	1	1
19.8025	-212.548	1	1	1
19.8441	-213.782	1	1	1
19.8858	-215.005	1	1	1
19.9275	-216.29	1	1	1
19.9691	-217.737	1	1	1
20.0108	-219.266	1	1	1
20.0525	-220.652	1	1	1
20.1011	-222.171	1	1	1
20.1427	-223.568	1	1	1
20.1844	-224.393	1	1	1
20.2261	-225.77	1	1	1
20.2747	-227.686	1	1	1
20.3164	-229.205	1	1	1
20.358	-230.754	1	1	1
20.3997	-232.508	1	1	1
20.4414	-234.088	1	1	1
20.483	-235.647	1	1	1
20.5247	-237.319	1	1	1
20.5664	-239.348	1	1	1
20.608	-241.376	1	1	1
20.6497	-243.231	1	1	1
20.6914	-245.311	1	1	1
20.733	-246.646	1	1	1
20.7747	-248.634	1	1	1
20.8164	-250.479	1	1	1
20.858	-252.569	1	1	1
20.8997	-255.545	1	1	1
20.9414	-257.87	1	1	1
20.983	-260.112	1	1	1
21.0247	-262.701	1	1	1
21.0664	-264.343	1	1	1
21.108	-267.523	1	1	1
21.1497	-270.377	1	1	1
21.1914	-273.629	1	1	1
21.233	-269.562	1	1	1
21.2816	-280.571	1	1	1
21.3233	-284.577	1	1	1
21.365	-288.502	1	1	1
21.4066	-292.436	1	1	1
21.4483	-297.207	1	1	1
21.49	-301.539	1	1	1
21.5316	-305.331	1	1	1
21.5733	-308.053	1	1	1
21.615	-315.719	1	1	1
21.6566	-320.683	1	1	1
21.6983	-327.299	1	1	1
21.74	-333.252	1	1	1
21.7816	-340.52	1	1	1
21.8233	-348.787	1	1	1
21.865	-356.014	1	1	1
21.9066	-364.659	1	1	1
21.9483	-372.885	1	1	1
21.99	-381.366	1	1	1
22.0316	-395.005	1	1	1
22.0733	-408.542	1	1	1
22.115	-420.102	1	1	1
22.1566	-438.736	1	1	1
22.1983	-452.773	1	1	1
22.24	-475.79	1	1	1
22.2816	-495.627	1	1	1
22.3233	-517.727	1	1	1
22.365	-542.334	1	1	1
22.4066	-561.121	1	1	1
22.4483	-593.71	1	1	1
25.7539	-8970.44	1	1	1
0.684941	0.8058	2	0	100000
1.21336	0.78292	2	0	100000
1.72795	0.76204	2	0	100000
1.8994	0.75552	2	0	100000
2.16767	0.7418	2	0	100000
2.66673	0.71916	2	0	100000
3.00264	0.70572	2	0	100000
3.23543	0.69608	2	0	100000
3.79407	0.67712	2	0	100000
4.20393	0.6612	2	0	100000
4.73208	0.64156	2	0	100000
4.93207	0.63408	2	0	100000
5.23605	0.62016	2	0	100000
5.66138	0.60472	2	0	100000
5.90556	0.59652	2	0	100000
6.13349	0.58632	2	0	100000
6.71218	0.56512	2	0	100000
6.92092	0.55804	2	0	100000
7.16822	0.54988	2	0	100000
7.7231	0.53316	2	0	100000
8.19827	0.51768	2	0	100000
8.7522	0.49604	2	0	100000
8.91773	0.48916	2	0	100000
9.14272	0.47908	2	0	100000
9.76253	0.45088	2	0	100000
10.0949	0.43612	2	0	100000
10.5946	0.413	2	0	100000
11.2215	0.38296	2	0	100000
11.7114	0.3602	2	0	100000
11.9043	0.35216	2	0	100000
12.1201	0.3434	2	0	100000
12.7093	0.31768	2	0	100000
12.9093	0.30888	2	0	100000
13.1813	0.29684	2	0	100000
13.7005	0.2742	2	0	100000
13.8925	0.26616	2	0	100000
14.1205	0.25664	2	0	100000
14.7513	0.22952	2	0	100000
15.0601	0.21692	2	0	100000
15.1746	0.21248	2	0	100000
15.7452	0.19368	2	0	100000
15.898	0.18936	2	0	100000
16.1811	0.1814	2	0	100000
16.7623	0.16744	2	0	100000
16.9919	0.16276	2	0	100000
17.1817	0.15908	2	0	100000
17.7592	0.14912	2	0	100000
18.1998	0.14208	2	0	100000
18.7144	0.13428	2	0	100000
19.0118	0.13016	2	0	100000
19.2948	0.12624	2	0	100000
19.6908	0.12056	2	0	100000
20.167	0.11372	2	0	100000
20.7026	0.1058	2	0	100000
21.23	0.09876	2	0	100000
21.7281	0.09296	2	0	100000
21.9719	0.09008	2	0	100000
22.101	0.08848	2	0	100000
22.7414	0.08152	2	0	100000
22.9132	0.07964	2	0	100000
23.1218	0.07752	2	0	100000
23.8274	0.07032	2	0	100000
24.1634	0.06672	2	0	100000
24.8353	0.05992	2	0	100000
25.2966	0.0552	2	0	100000
25.7192	0.05092	2	0	100000
26.1008	0.04716	2	0	100000
26.6954	0.0414	2	0	100000
27.0688	0.0382	2	0	100000
27.7363	0.03272	2	0	100000
28.6683	0.02616	2	0	100000
29.7469	0.0185688	2	0	100000

## Sheet: tens_interpolation
		Datum / Zeit	Tension unten [hPa]	Tension oben [hPa]
m_bot	b_bot	2013-07-31 15:49:15	0.65	3.59
82.8	-3.43509e+06	2013-07-31 16:09:15	1.8	4.76
m_top	b_top	2013-07-31 15:53:59	0.921717	3.86644
84.24	-3.49483e+06	y = m*x+b
		AE unten [t]	AE oben [t]
		41227.2
			Brutto-Gewicht [g]	Netto-Gewicht [g]
-1.40314	58626.9	2013-08-23 17:58:52	382.99	12.72
		2013-08-24 10:54:53	382	11.73
-1.40314	58256.7	2013-08-24 06:49:00	382.24	11.9696
			AE unten
m_bot	b_bot	2013-08-28 08:43:56	386.14	15.94
-1.75955	73432.7	2013-08-29 07:06:06	384.5	14.3
m_top	b_top	2013-08-30 08:59:15	382.602	12.4022
-1.75955	73062.5	y = m*x+b
