# Supplementary material for: A pore-size classification for peat bogs derived from unsaturated hydraulic properties
Source: Copernicus journal article supplement (doi:10.5194/hess-21-6185-2017), 2017-12-07
Supplement: Supplementary file 11 [file E3_HYDRUS.xlsx]

## Sheet: Gewicht
Datum / Zeit	Brutto-Gewicht [g]	Netto-Gewicht [g]	Gewichtsänderung [g]	Zeit [d]	Theta [-]	Verdunstungsrate [cm/d]		Volumen	250.34
2013-07-31 15:36:55	612.46	244.66	-1.76					Höhe	5
2013-08-01 20:14:07	599.56	231.76	-14.66	1.1925	0.894783	0.216058		A	50.068
2013-08-02 08:34:10	594.54	226.74	-19.68	1.70642	0.87473	0.195097		Theta0	0.946313
2013-08-02 12:40:39	592.85	225.05	-21.37	1.87759	0.86798	0.197195		Trockengewicht	7.76
2013-08-02 19:52:37	588.46	220.66	-25.76	2.17757	0.850443	0.29229		Ks (as in Ksat)
2013-08-03 07:06:09	583.02	215.22	-31.2	2.6453	0.828713	0.232295		delta System [g]	367.8
2013-08-03 15:09:32	579.45	211.65	-34.77	2.98099	0.814452	0.212409
2013-08-03 21:11:13	576.68	208.88	-37.54	3.23215	0.803387	0.220274
2013-08-04 10:13:37	572.23	204.43	-41.99	3.77549	0.785612	0.163581
2013-08-04 20:19:32	568.09	200.29	-46.13	4.19626	0.769074	0.196512
2013-08-05 08:40:12	563.52	195.72	-50.7	4.71061	0.750819	0.177458
2013-08-05 13:28:50	561.48	193.68	-52.74	4.91105	0.74267	0.203277
2013-08-05 20:45:43	557.63	189.83	-56.59	5.21444	0.727291	0.253455
2013-08-06 07:23:07	553.61	185.81	-60.61	5.65709	0.711233	0.181389
2013-08-06 12:49:43	551.7	183.9	-62.52	5.88389	0.703603	0.168197
2013-08-06 18:18:05	548.89	181.09	-65.33	6.11192	0.692378	0.246122
2013-08-07 08:11:34	543.67	175.87	-70.55	6.69073	0.671527	0.180126
2013-08-07 13:11:58	541.93	174.13	-72.29	6.89934	0.664576	0.166593
2013-08-07 19:33:37	539.81	172.01	-74.41	7.16438	0.656108	0.15976
2013-08-08 08:27:09	536.06	168.26	-78.16	7.70155	0.641128	0.139431
2013-08-08 19:51:20	532.4	164.6	-81.82	8.17668	0.626508	0.153854
2013-08-09 09:31:48	527.34	159.54	-86.88	8.74644	0.606295	0.177376
2013-08-09 13:18:27	525.81	158.01	-88.41	8.90384	0.600184	0.194144
2013-08-09 18:31:37	523.15	155.35	-91.07	9.12132	0.589558	0.244296
2013-08-10 09:23:47	516.34	148.54	-97.88	9.74088	0.562355	0.219534
2013-08-10 17:44:42	512.4	144.6	-101.82	10.0887	0.546617	0.226218
2013-08-11 05:22:24	507.12	139.32	-107.1	10.5733	0.525525	0.217654
2013-08-11 20:24:41	499.92	132.12	-114.3	11.1998	0.496764	0.229507
2013-08-12 08:40:51	494.41	126.61	-119.81	11.7111	0.474754	0.215267
2013-08-12 12:48:03	492.72	124.92	-121.5	11.8827	0.468004	0.196621
2013-08-12 17:58:50	490.62	122.82	-123.6	12.0986	0.459615	0.19434
2013-08-13 08:07:19	484.82	117.02	-129.4	12.6878	0.436446	0.196601
2013-08-13 12:55:23	482.71	114.91	-131.51	12.8878	0.428018	0.210673
2013-08-13 20:00:12	479.4	111.6	-134.82	13.1828	0.414796	0.224089
2013-08-14 07:54:31	474.29	106.49	-139.93	13.6789	0.394384	0.205748
2013-08-14 12:31:22	472.35	104.55	-141.87	13.8711	0.386634	0.201538
2013-08-14 18:00:43	469.87	102.07	-144.35	14.0999	0.376728	0.216574
2013-08-14 18:19:31	469.73	101.93	-144.49	14.1129	0.376168	0.214129
2013-08-15 11:16:55	462.18	94.38	-152.04	14.8194	0.346009	0.21343
2013-08-15 16:32:26	459.78	91.98	-154.44	15.0386	0.336422	0.218774
2013-08-15 19:17:11	458.47	90.67	-155.75	15.153	0.33119	0.228688
2013-08-16 08:58:50	452.62	84.82	-161.6	15.7236	0.307821	0.204771
2013-08-16 12:38:47	451.04	83.24	-163.18	15.8763	0.30151	0.206606
2013-08-16 19:22:01	447.62	79.82	-166.6	16.1563	0.287849	0.243931
2013-08-17 09:24:21	441.45	73.65	-172.77	16.7413	0.263202	0.21067
2013-08-17 15:12:54	439.1	71.3	-175.12	16.9833	0.253815	0.193914
2013-08-17 19:22:53	437.28	69.48	-176.94	17.1569	0.246545	0.209394
2013-08-18 09:14:18	432.59	64.79	-181.63	17.7343	0.22781	0.162241
2013-08-18 19:53:24	429.28	61.48	-184.94	18.1781	0.214588	0.148956
2013-08-19 08:14:31	426.05	58.25	-188.17	18.6928	0.201686	0.125348
2013-08-19 15:22:54	424.32	56.52	-189.9	18.9903	0.194775	0.116149
2013-08-19 22:10:27	422.72	54.92	-191.5	19.2733	0.188384	0.112912
2013-08-20 07:40:41	420.47	52.67	-193.75	19.6693	0.179396	0.113485
2013-08-20 19:01:52	417.79	49.99	-196.43	20.1423	0.168691	0.113153
2013-08-21 07:57:36	414.85	47.05	-199.37	20.681	0.156947	0.109003
2013-08-21 20:32:37	412.02	44.22	-202.2	21.2053	0.145642	0.107804
2013-08-22 08:34:12	409.78	41.98	-204.44	21.7064	0.136694	0.0892819
2013-08-22 14:38:19	408.52	40.72	-205.7	21.9593	0.131661	0.0995244
2013-08-22 17:32:44	408.07	40.27	-206.15	22.0804	0.129863	0.0742041
2013-08-23 08:53:20	405.43	37.63	-208.79	22.7197	0.119318	0.0824775
2013-08-23 13:01:03	404.75	36.95	-209.47	22.8918	0.116601	0.0789501
2013-08-23 18:01:22	403.93	36.13	-210.29	23.1003	0.113326	0.0785297
2013-08-24 10:57:14	401.3	33.5	-212.92	23.8058	0.10282	0.0744595
2013-08-24 18:55:56	399.99	32.19	-214.23	24.1382	0.0975873	0.0787064
2013-08-25 11:08:38	397.6	29.8	-216.62	24.8137	0.0880403	0.0706686
2013-08-25 22:08:00	395.91	28.11	-218.31	25.2716	0.0812894	0.0737158
2013-08-26 08:21:43	394.43	26.63	-219.79	25.6978	0.0753775	0.0693578
2013-08-26 17:32:59	393.14	25.34	-221.08	26.0806	0.0702245	0.067302
2013-08-27 07:48:08	391.26	23.46	-222.96	26.6745	0.0627147	0.0632289
2013-08-27 16:44:54	390.17	22.37	-224.05	27.0472	0.0583606	0.0584045
2013-08-28 08:46:36	388.38	20.58	-225.84	27.7151	0.0512104	0.0535322
2013-08-29 07:05:44	386.2	18.4	-228.02	28.645	0.0425022	0.0468205
2013-08-29 17:26:32	385.19	17.39	-229.03	29.0761	0.0384677	0.0467919
2013-08-30 09:32:16	383.72	15.92	-230.5	29.7468	0.0325957	0.0437784
2013-08-30 19:50:51	382.74	14.94	-231.48	30.1763	0.028681	0.0455656
2013-08-31 08:56:29	381.65	13.85	-232.57	30.7219	0.0243269	0.0399034
2013-08-31 18:02:54	381.02	13.22	-233.2	31.1014	0.0218103	0.0331602
2013-09-01 10:45:21	379.88	12.08	-234.34	31.7975	0.0172565	0.0327069

## Sheet: Tensionen
Datum / Zeit	Tension unten [hPa]	Tension oben [hPa]	Zeit [d]	Zeit [d]	MP bot(2) [cm]	MP top(1) [cm]		WÄGUNG START
2013-07-31 15:21:15	1.42	3.93		0.00606301	-1.4475	-4.00612		41486.6	-824.771
2013-07-31 15:22:15	1.43	3.94		0.00675745	-1.4577	-4.01631		2013-07-31 15:12:31
2013-07-31 15:23:15	1.44	3.93		0.0074519	-1.46789	-4.00612
2013-07-31 15:24:15	1.43	3.94		0.00814634	-1.4577	-4.01631
2013-07-31 15:25:15	1.44	3.94		0.00884078	-1.46789	-4.01631
2013-07-31 15:26:15	1.44	3.95		0.00953523	-1.46789	-4.0265
2013-07-31 15:27:15	1.44	3.95		0.0102297	-1.46789	-4.0265
2013-07-31 15:28:15	1.46	3.96		0.0109241	-1.48828	-4.0367
2013-07-31 15:29:15	1.45	3.94		0.0116186	-1.47808	-4.01631	2013-07-31 15:29:15
2013-07-31 15:31:15	1.44	3.95		0.0130075	-1.46789	-4.0265
2013-07-31 15:32:15	1.45	3.94		0.0137019	-1.47808	-4.01631
2013-07-31 15:33:15	1.46	3.94		0.0143963	-1.48828	-4.01631
2013-07-31 15:34:15	1.46	3.96		0.0150908	-1.48828	-4.0367
2013-07-31 15:59:15	2.55	5.06		0.0324519	-2.59939	-5.158
2013-07-31 16:09:15	2.59	5.15		0.0393963	-2.64016	-5.24975
2013-07-31 16:19:15	2.62	5.17		0.0463408	-2.67074	-5.27013
2013-07-31 16:29:15	2.7	5.24		0.0532852	-2.75229	-5.34149	2013-07-31 16:29:15
2013-07-31 16:39:15	2.78	5.31		0.0602297	-2.83384	-5.41284
2013-07-31 16:49:15	2.84	5.37		0.0671741	-2.89501	-5.47401
2013-07-31 16:59:15	2.95	5.48		0.0741186	-3.00714	-5.58614
2013-07-31 17:09:15	2.96	5.49		0.081063	-3.01733	-5.59633
2013-07-31 17:19:15	3.09	5.62		0.0880075	-3.14985	-5.72885
2013-07-31 17:29:15	3.02	5.55		0.0949519	-3.07849	-5.65749	2013-07-31 17:29:15
2013-07-31 17:39:15	3.08	5.61		0.101896	-3.13965	-5.71865
2013-07-31 17:49:15	3.18	5.73		0.108841	-3.24159	-5.84098
2013-07-31 18:09:15	3.32	5.85		0.12273	-3.3843	-5.9633
2013-07-31 18:19:15	3.37	5.9		0.129674	-3.43527	-6.01427
2013-07-31 18:29:15	3.45	5.99		0.136619	-3.51682	-6.10601
2013-07-31 18:39:15	3.47	6		0.143563	-3.53721	-6.11621	2013-07-31 18:39:15
2013-07-31 18:59:15	3.57	6.1		0.157452	-3.63914	-6.21814
2013-07-31 19:19:15	3.55	6.09		0.171341	-3.61876	-6.20795
2013-07-31 19:29:15	3.71	6.25		0.178285	-3.78186	-6.37105
2013-07-31 19:39:15	3.79	6.31		0.18523	-3.8634	-6.43221
2013-07-31 19:49:15	3.82	6.35		0.192174	-3.89399	-6.47299
2013-07-31 19:59:15	3.91	6.42		0.199119	-3.98573	-6.54434	2013-07-31 19:59:15
2013-07-31 20:09:15	3.93	6.46		0.206063	-4.00612	-6.58512
2013-07-31 20:19:15	3.91	6.43		0.213007	-3.98573	-6.55454
2013-07-31 20:29:15	4.02	6.55		0.219952	-4.09786	-6.67686
2013-07-31 20:39:15	4.04	6.58		0.226896	-4.11825	-6.70744
2013-07-31 20:49:15	4.15	6.68		0.233841	-4.23038	-6.80938
2013-07-31 20:59:15	4.21	6.74		0.240785	-4.29154	-6.87054	2013-07-31 20:59:15
2013-07-31 21:09:15	4.26	6.8		0.24773	-4.34251	-6.9317
2013-07-31 21:19:15	4.35	6.88		0.254674	-4.43425	-7.01325
2013-07-31 21:29:15	4.38	6.92		0.261619	-4.46483	-7.05403
2013-07-31 21:39:15	4.47	7		0.268563	-4.55657	-7.13558
2013-07-31 21:49:15	4.52	7.05		0.275507	-4.60754	-7.18654
2013-07-31 22:09:15	4.62	7.15		0.289396	-4.70948	-7.28848	2013-07-31 22:09:15
2013-07-31 22:19:15	4.7	7.24		0.296341	-4.79103	-7.38022
2013-07-31 22:29:15	4.76	7.3		0.303285	-4.85219	-7.44139
2013-07-31 22:39:15	4.83	7.37		0.31023	-4.92355	-7.51274
2013-07-31 22:49:15	4.89	7.43		0.317174	-4.98471	-7.5739
2013-07-31 22:59:15	4.2	6.73		0.324119	-4.28135	-6.86035
2013-07-31 23:09:15	4.33	6.87		0.331063	-4.41386	-7.00306	2013-07-31 23:09:15
2013-07-31 23:19:15	4.47	7		0.338007	-4.55657	-7.13558
2013-07-31 23:29:15	4.55	7.1		0.344952	-4.63812	-7.23751
2013-07-31 23:39:15	4.65	7.19		0.351896	-4.74006	-7.32926
2013-07-31 23:49:15	4.78	7.31		0.358841	-4.87258	-7.45158
2013-07-31 23:59:15	4.76	7.31		0.365785	-4.85219	-7.45158
2013-08-01 00:09:15	4.87	7.4		0.37273	-4.96432	-7.54332	2013-08-01 00:09:15
2013-08-01 00:19:15	4.85	7.38		0.379674	-4.94393	-7.52294
2013-08-01 00:29:15	4.94	7.47		0.386619	-5.03568	-7.61468
2013-08-01 00:39:15	4.93	7.47		0.393563	-5.02548	-7.61468
2013-08-01 00:49:15	5	7.55		0.400507	-5.09684	-7.69623
2013-08-01 00:59:15	5.08	7.61		0.407452	-5.17839	-7.75739
2013-08-01 01:09:15	5.11	7.64		0.414396	-5.20897	-7.78797	2013-08-01 01:09:15
2013-08-01 01:19:15	5.15	7.69		0.421341	-5.24975	-7.83894
2013-08-01 01:29:15	5.21	7.74		0.428285	-5.31091	-7.88991
2013-08-01 01:39:15	5.23	7.77		0.43523	-5.33129	-7.92049
2013-08-01 01:49:15	5.28	7.82		0.442174	-5.38226	-7.97146
2013-08-01 01:59:15	5.34	7.87		0.449119	-5.44343	-8.02243
2013-08-01 02:09:15	5.37	7.91		0.456063	-5.47401	-8.0632	2013-08-01 02:09:15
2013-08-01 02:19:15	5.42	7.95		0.463007	-5.52497	-8.10398
2013-08-01 02:29:15	5.45	7.98		0.469952	-5.55556	-8.13456
2013-08-01 02:39:15	5.49	8.04		0.476896	-5.59633	-8.19572
2013-08-01 02:49:15	5.56	8.1		0.483841	-5.66769	-8.25688
2013-08-01 02:59:15	5.58	8.12		0.490785	-5.68807	-8.27727
2013-08-01 03:09:15	5.62	8.16		0.49773	-5.72885	-8.31804	2013-08-01 03:09:15
2013-08-01 03:19:15	5.66	8.2		0.504674	-5.76962	-8.35882
2013-08-01 03:29:15	5.68	8.22		0.511619	-5.79001	-8.3792
2013-08-01 03:39:15	5.75	8.29		0.518563	-5.86137	-8.45056
2013-08-01 03:49:15	5.77	8.3		0.525507	-5.88175	-8.46075
2013-08-01 03:59:15	5.82	8.35		0.532452	-5.93272	-8.51172
2013-08-01 04:09:15	5.69	8.22		0.539396	-5.8002	-8.3792	2013-08-01 04:09:15
2013-08-01 04:19:15	5.71	8.24		0.546341	-5.82059	-8.39959
2013-08-01 04:29:15	5.78	8.31		0.553285	-5.89195	-8.47095
2013-08-01 04:39:15	5.83	8.37		0.56023	-5.94292	-8.53211
2013-08-01 04:49:15	5.8	8.34		0.567174	-5.91233	-8.50153
2013-08-01 04:59:15	5.86	8.4		0.574119	-5.9735	-8.56269
2013-08-01 05:09:15	5.87	8.42		0.581063	-5.98369	-8.58308	2013-08-01 05:09:15
2013-08-01 05:19:15	5.91	8.44		0.588007	-6.02446	-8.60347
2013-08-01 05:29:15	5.95	8.49		0.594952	-6.06524	-8.65443
2013-08-01 05:39:15	6	8.54		0.601896	-6.11621	-8.7054
2013-08-01 05:49:15	6.04	8.57		0.608841	-6.15698	-8.73598
2013-08-01 05:59:15	6.06	8.61		0.615785	-6.17737	-8.77676
2013-08-01 06:09:15	6.12	8.66		0.62273	-6.23853	-8.82773	2013-08-01 06:09:15
2013-08-01 06:19:15	6.17	8.7		0.629674	-6.2895	-8.8685
2013-08-01 06:29:15	6.16	8.7		0.636619	-6.27931	-8.8685
2013-08-01 06:39:15	6.19	8.73		0.643563	-6.30989	-8.89908
2013-08-01 06:49:15	6.24	8.79		0.650507	-6.36086	-8.96024
2013-08-01 06:59:15	6.28	8.82		0.657452	-6.40163	-8.99083
2013-08-01 07:09:15	6.3	8.84		0.664396	-6.42202	-9.01121	2013-08-01 07:09:15
2013-08-01 07:19:15	6.34	8.88		0.671341	-6.46279	-9.05199
2013-08-01 07:29:15	6.11	8.65		0.678285	-6.22834	-8.81753
2013-08-01 07:39:15	6.22	8.76		0.68523	-6.34047	-8.92966
2013-08-01 07:49:15	6.3	8.83		0.692174	-6.42202	-9.00102
2013-08-01 07:59:15	6.36	8.9		0.699119	-6.48318	-9.07238
2013-08-01 08:09:15	6.42	8.96		0.706063	-6.54434	-9.13354	2013-08-01 08:09:15
2013-08-01 08:19:15	6.43	8.97		0.713007	-6.55454	-9.14373
2013-08-01 08:29:15	6.46	8.99		0.719952	-6.58512	-9.16412
2013-08-01 08:39:15	6.49	9.03		0.726896	-6.6157	-9.20489
2013-08-01 08:49:15	6.53	9.06		0.733841	-6.65647	-9.23547
2013-08-01 08:59:15	6.57	9.1		0.740785	-6.69725	-9.27625
2013-08-01 09:09:15	6.42	8.95		0.74773	-6.54434	-9.12334	2013-08-01 09:09:15
2013-08-01 09:19:15	6.51	9.03		0.754674	-6.63609	-9.20489
2013-08-01 09:29:15	6.58	9.12		0.761619	-6.70744	-9.29664
2013-08-01 09:39:15	6.63	9.15		0.768563	-6.75841	-9.32722
2013-08-01 09:49:15	6.53	9.06		0.775507	-6.65647	-9.23547
2013-08-01 09:59:15	6.66	9.18		0.782452	-6.78899	-9.3578
2013-08-01 10:09:15	6.73	9.25		0.789396	-6.86035	-9.42915	2013-08-01 10:09:15
2013-08-01 10:19:15	6.75	9.27		0.796341	-6.88073	-9.44954
2013-08-01 10:39:15	6.76	9.28		0.81023	-6.89093	-9.45973
2013-08-01 10:49:15	6.81	9.32		0.817174	-6.9419	-9.50051
2013-08-01 10:59:15	6.83	9.36		0.824119	-6.96228	-9.54128
2013-08-01 11:09:15	6.57	9.05		0.831063	-6.69725	-9.22528
2013-08-01 11:19:15	6.66	9.15		0.838007	-6.78899	-9.32722	2013-08-01 11:19:15
2013-08-01 11:29:15	6.77	9.24		0.844952	-6.90112	-9.41896
2013-08-01 11:39:15	6.88	9.36		0.851896	-7.01325	-9.54128
2013-08-01 11:49:15	6.94	9.42		0.858841	-7.07441	-9.60245
2013-08-01 11:59:15	6.99	9.48		0.865785	-7.12538	-9.66361
2013-08-01 12:09:15	7.03	9.49		0.87273	-7.16616	-9.6738
2013-08-01 12:19:15	7.04	9.52		0.879674	-7.17635	-9.70438	2013-08-01 12:19:15
2013-08-01 12:29:15	7.1	9.59		0.886619	-7.23751	-9.77574
2013-08-01 12:39:15	7.15	9.63		0.893563	-7.28848	-9.81651
2013-08-01 12:49:15	7.16	9.63		0.900507	-7.29867	-9.81651
2013-08-01 12:59:15	7.2	9.68		0.907452	-7.33945	-9.86748
2013-08-01 13:09:15	7.22	9.7		0.914396	-7.35984	-9.88787
2013-08-01 13:19:15	6.83	9.31		0.921341	-6.96228	-9.49032	2013-08-01 13:19:15
2013-08-01 13:29:15	6.87	9.36		0.928285	-7.00306	-9.54128
2013-08-01 13:39:15	7.02	9.5		0.93523	-7.15596	-9.684
2013-08-01 13:49:15	7.16	9.64		0.942174	-7.29867	-9.82671
2013-08-01 13:59:15	7.21	9.69		0.949119	-7.34964	-9.87768
2013-08-01 14:09:15	7.26	9.72		0.956063	-7.40061	-9.90826
2013-08-01 14:19:15	7.3	9.79		0.963007	-7.44139	-9.97961	2013-08-01 14:19:15
2013-08-01 14:29:15	7.34	9.82		0.969952	-7.48216	-10.0102
2013-08-01 14:39:15	7.41	9.89		0.976896	-7.55352	-10.0815
2013-08-01 14:49:15	7.45	9.93		0.983841	-7.59429	-10.1223
2013-08-01 14:59:15	7.51	9.98		0.990785	-7.65545	-10.1733
2013-08-01 15:09:15	7.55	10.03		0.99773	-7.69623	-10.2243
2013-08-01 15:19:15	7.6	10.08		1.00467	-7.7472	-10.2752	2013-08-01 15:19:15
2013-08-01 15:29:15	7.64	10.12		1.01162	-7.78797	-10.316
2013-08-01 15:39:15	7.66	10.13		1.01856	-7.80836	-10.3262
2013-08-01 15:49:15	7.72	10.2		1.02551	-7.86952	-10.3976
2013-08-01 15:59:15	7.74	10.22		1.03245	-7.88991	-10.4179
2013-08-01 16:09:15	7.72	10.2		1.0394	-7.86952	-10.3976
2013-08-01 16:19:15	7.83	10.31		1.04634	-7.98165	-10.5097	2013-08-01 16:19:15
2013-08-01 16:29:15	7.88	10.36		1.05329	-8.03262	-10.5607
2013-08-01 16:39:15	7.88	10.36		1.06023	-8.03262	-10.5607
2013-08-01 16:49:15	7.93	10.41		1.06717	-8.08359	-10.6116
2013-08-01 16:59:15	7.96	10.43		1.07412	-8.11417	-10.632
2013-08-01 17:09:15	7.98	10.46		1.08106	-8.13456	-10.6626
2013-08-01 17:19:15	8.05	10.52		1.08801	-8.20591	-10.7238	2013-08-01 17:19:15
2013-08-01 17:29:15	8.07	10.55		1.09495	-8.2263	-10.7543
2013-08-01 17:39:15	8.13	10.61		1.1019	-8.28746	-10.8155
2013-08-01 17:49:15	8.1	10.57		1.10884	-8.25688	-10.7747
2013-08-01 17:59:15	8.18	10.65		1.11579	-8.33843	-10.8563
2013-08-01 18:09:15	8.22	10.69		1.12273	-8.3792	-10.897
2013-08-01 18:19:15	8.12	10.6		1.12967	-8.27727	-10.8053	2013-08-01 18:19:15
2013-08-01 18:29:15	8.23	10.71		1.13662	-8.3894	-10.9174
2013-08-01 18:39:15	8.3	10.78		1.14356	-8.46075	-10.9888
2013-08-01 18:49:15	8.17	10.68		1.15051	-8.32824	-10.8869
2013-08-01 18:59:15	8.29	10.78		1.15745	-8.45056	-10.9888
2013-08-01 19:09:15	8.35	10.84		1.1644	-8.51172	-11.0499
2013-08-01 19:19:15	8.4	10.89		1.17134	-8.56269	-11.1009	2013-08-01 19:19:15
2013-08-01 19:29:15	8.43	10.91		1.17829	-8.59327	-11.1213
2013-08-01 19:39:15	8.5	10.98		1.18523	-8.66463	-11.1927
2013-08-01 19:49:15	8.54	11.03		1.19217	-8.7054	-11.2436
2013-08-01 19:59:15	8.6	11.08		1.19912	-8.76656	-11.2946
2013-08-01 20:09:15	8.59	11.08		1.20606	-8.75637	-11.2946
2013-08-01 20:19:15	8.02	10.51		1.21301	-8.17533	-10.7136	2013-08-01 20:19:15
2013-08-01 20:29:15	8.16	10.68		1.21995	-8.31804	-10.8869
2013-08-01 20:39:15	8.34	10.84		1.2269	-8.50153	-11.0499
2013-08-01 20:49:15	8.45	10.97		1.23384	-8.61366	-11.1825
2013-08-01 20:59:15	8.54	11.04		1.24079	-8.7054	-11.2538
2013-08-01 21:19:15	8.09	10.56		1.25467	-8.24669	-10.7645
2013-08-01 21:29:15	8.21	10.73		1.26162	-8.36901	-10.9378	2013-08-01 21:29:15
2013-08-01 21:39:15	8.33	10.85		1.26856	-8.49134	-11.0601
2013-08-01 21:49:15	8.45	10.94		1.27551	-8.61366	-11.1519
2013-08-01 21:59:15	8.54	11.05		1.28245	-8.7054	-11.264
2013-08-01 22:09:15	8.63	11.14		1.2894	-8.79715	-11.3558
2013-08-01 22:19:15	8.67	11.16		1.29634	-8.83792	-11.3761
2013-08-01 22:29:15	8.7	11.2		1.30329	-8.8685	-11.4169	2013-08-01 22:29:15
2013-08-01 22:39:15	8.76	11.27		1.31023	-8.92966	-11.4883
2013-08-01 22:49:15	8.77	11.27		1.31717	-8.93986	-11.4883
2013-08-01 22:59:15	8.79	11.3		1.32412	-8.96024	-11.5189
2013-08-01 23:09:15	8.82	11.33		1.33106	-8.99083	-11.5494
2013-08-01 23:19:15	8.85	11.36		1.33801	-9.02141	-11.58
2013-08-01 23:29:15	8.89	11.39		1.34495	-9.06218	-11.6106	2013-08-01 23:29:15
2013-08-01 23:39:15	8.93	11.43		1.3519	-9.10296	-11.6514
2013-08-01 23:49:15	8.95	11.45		1.35884	-9.12334	-11.6718
2013-08-01 23:59:15	8.99	11.49		1.36579	-9.16412	-11.7125
2013-08-02 00:19:15	9.03	11.54		1.37967	-9.20489	-11.7635
2013-08-02 00:29:15	9.04	11.55		1.38662	-9.21509	-11.7737
2013-08-02 00:39:15	9.07	11.58		1.39356	-9.24567	-11.8043	2013-08-02 00:39:15
2013-08-02 00:49:15	9.09	11.6		1.40051	-9.26606	-11.8247
2013-08-02 00:59:15	9.14	11.64		1.40745	-9.31702	-11.8654
2013-08-02 01:19:15	9.18	11.7		1.42134	-9.3578	-11.9266
2013-08-02 01:29:15	9.18	11.69		1.42829	-9.3578	-11.9164
2013-08-02 01:39:15	9.23	11.74		1.43523	-9.40877	-11.9674
2013-08-02 01:49:15	9.28	11.77		1.44217	-9.45973	-11.998	2013-08-02 01:49:15
2013-08-02 01:59:15	9.28	11.79		1.44912	-9.45973	-12.0183
2013-08-02 02:09:15	9.3	11.82		1.45606	-9.48012	-12.0489
2013-08-02 02:19:15	9.34	11.85		1.46301	-9.5209	-12.0795
2013-08-02 02:29:15	9.35	11.86		1.46995	-9.53109	-12.0897
2013-08-02 02:39:15	9.36	11.87		1.4769	-9.54128	-12.0999
2013-08-02 02:49:15	9.39	11.9		1.48384	-9.57187	-12.1305	2013-08-02 02:49:15
2013-08-02 02:59:15	9.38	11.91		1.49079	-9.56167	-12.1407
2013-08-02 03:19:15	9.41	11.92		1.50467	-9.59225	-12.1509
2013-08-02 03:29:15	9.47	11.97		1.51162	-9.65341	-12.2018
2013-08-02 03:39:15	9.5	12.01		1.51856	-9.684	-12.2426
2013-08-02 03:49:15	9.49	12		1.52551	-9.6738	-12.2324
2013-08-02 03:59:15	9.52	12.04		1.53245	-9.70438	-12.2732	2013-08-02 03:59:15
2013-08-02 04:09:15	9.53	12.04		1.5394	-9.71458	-12.2732
2013-08-02 04:19:15	9.57	12.08		1.54634	-9.75535	-12.314
2013-08-02 04:29:15	9.58	12.09		1.55329	-9.76555	-12.3242
2013-08-02 04:39:15	9.6	12.11		1.56023	-9.78593	-12.3445
2013-08-02 04:49:15	9.62	12.13		1.56717	-9.80632	-12.3649
2013-08-02 04:59:15	9.61	12.13		1.57412	-9.79613	-12.3649	2013-08-02 04:59:15
2013-08-02 05:09:15	9.65	12.16		1.58106	-9.8369	-12.3955
2013-08-02 05:19:15	9.65	12.17		1.58801	-9.8369	-12.4057
2013-08-02 05:29:15	9.69	12.19		1.59495	-9.87768	-12.4261
2013-08-02 05:39:15	9.68	12.19		1.6019	-9.86748	-12.4261
2013-08-02 05:49:15	9.72	12.23		1.60884	-9.90826	-12.4669
2013-08-02 05:59:15	9.74	12.26		1.61579	-9.92864	-12.4975	2013-08-02 05:59:15
2013-08-02 06:09:15	9.72	12.24		1.62273	-9.90826	-12.4771
2013-08-02 06:19:15	9.76	12.28		1.62967	-9.94903	-12.5178
2013-08-02 06:29:15	9.79	12.31		1.63662	-9.97961	-12.5484
2013-08-02 06:49:15	9.84	12.37		1.65051	-10.0306	-12.6096
2013-08-02 06:59:15	9.88	12.39		1.65745	-10.0714	-12.63
2013-08-02 07:09:15	9.88	12.39		1.6644	-10.0714	-12.63	2013-08-02 07:09:15
2013-08-02 07:19:15	9.9	12.42		1.67134	-10.0917	-12.6606
2013-08-02 07:29:15	9.92	12.44		1.67829	-10.1121	-12.6809
2013-08-02 07:39:15	9.25	11.77		1.68523	-9.42915	-11.998
2013-08-02 07:49:15	9.42	11.93		1.69217	-9.60245	-12.1611
2013-08-02 07:59:15	9.51	12.03		1.69912	-9.69419	-12.263
2013-08-02 08:09:15	9.64	12.15		1.70606	-9.82671	-12.3853	2013-08-02 08:09:15
2013-08-02 08:19:15	9.73	12.25		1.71301	-9.91845	-12.4873
2013-08-02 08:29:15	9.83	12.36		1.71995	-10.0204	-12.5994
2013-08-02 08:49:15	9.4	11.92		1.73384	-9.58206	-12.1509
2013-08-02 08:59:15	9.49	12.01		1.74079	-9.6738	-12.2426
2013-08-02 09:09:15	9	11.51		1.74773	-9.17431	-11.7329
2013-08-02 09:19:15	9.11	11.62		1.75467	-9.28644	-11.8451	2013-08-02 09:19:15
2013-08-02 09:29:15	9.18	11.69		1.76162	-9.3578	-11.9164
2013-08-02 09:39:15	9.31	11.83		1.76856	-9.49032	-12.0591
2013-08-02 09:49:15	9.4	11.92		1.77551	-9.58206	-12.1509
2013-08-02 09:59:15	9.51	12.03		1.78245	-9.69419	-12.263
2013-08-02 10:09:15	9.62	12.14		1.7894	-9.80632	-12.3751
2013-08-02 10:19:15	9.7	12.2		1.79634	-9.88787	-12.4363	2013-08-02 10:19:15
2013-08-02 10:29:15	9.78	12.29		1.80329	-9.96942	-12.528
2013-08-02 10:39:15	9.79	12.3		1.81023	-9.97961	-12.5382
2013-08-02 10:49:15	9.89	12.39		1.81717	-10.0815	-12.63
2013-08-02 10:59:15	9.92	12.43		1.82412	-10.1121	-12.6707
2013-08-02 11:09:15	9.94	12.46		1.83106	-10.1325	-12.7013
2013-08-02 11:19:15	9.98	12.48		1.83801	-10.1733	-12.7217	2013-08-02 11:19:15
2013-08-02 11:29:15	10	12.51		1.84495	-10.1937	-12.7523
2013-08-02 11:39:15	10.05	12.55		1.8519	-10.2446	-12.7931
2013-08-02 11:49:15	10.09	12.58		1.85884	-10.2854	-12.8236
2013-08-02 11:59:15	10.11	12.61		1.86579	-10.3058	-12.8542
2013-08-02 12:09:15	10.09	12.61		1.87273	-10.2854	-12.8542
2013-08-02 12:19:15	10.16	12.66		1.87967	-10.3568	-12.9052	2013-08-02 12:19:15
2013-08-02 12:29:15	10.17	12.68		1.88662	-10.367	-12.9256
2013-08-02 12:39:15	10.23	12.72		1.89356	-10.4281	-12.9664
2013-08-02 12:49:15	10.04	12.55		1.90051	-10.2345	-12.7931
2013-08-02 12:59:15	10.16	12.69		1.90745	-10.3568	-12.9358
2013-08-02 13:09:15	10.24	12.76		1.9144	-10.4383	-13.0071
2013-08-02 13:19:15	10.28	12.79		1.92134	-10.4791	-13.0377	2013-08-02 13:19:15
2013-08-02 13:29:15	10.32	12.84		1.92829	-10.5199	-13.0887
2013-08-02 13:39:15	10.36	12.87		1.93523	-10.5607	-13.1193
2013-08-02 13:49:15	10.24	12.75		1.94217	-10.4383	-12.9969
2013-08-02 14:09:15	10.41	12.93		1.95606	-10.6116	-13.1804
2013-08-02 14:19:15	10.43	12.95		1.96301	-10.632	-13.2008
2013-08-02 14:29:15	10.47	13		1.96995	-10.6728	-13.2518	2013-08-02 14:29:15
2013-08-02 14:39:15	10.51	13.02		1.9769	-10.7136	-13.2722
2013-08-02 14:49:15	10.51	13.02		1.98384	-10.7136	-13.2722
2013-08-02 14:59:15	10.53	13.08		1.99079	-10.7339	-13.3333
2013-08-02 15:09:15	10.56	13.06		1.99773	-10.7645	-13.3129
2013-08-02 15:19:15	10.6	13.12		2.00467	-10.8053	-13.3741
2013-08-02 15:29:15	10.63	13.15		2.01162	-10.8359	-13.4047	2013-08-02 15:29:15
2013-08-02 15:39:15	10.65	13.17		2.01856	-10.8563	-13.4251
2013-08-02 15:49:15	10.67	13.19		2.02551	-10.8767	-13.4455
2013-08-02 15:59:15	10.71	13.23		2.03245	-10.9174	-13.4862
2013-08-02 16:09:15	10.65	13.16		2.0394	-10.8563	-13.4149
2013-08-02 16:19:15	10.74	13.25		2.04634	-10.948	-13.5066
2013-08-02 16:29:15	10.79	13.3		2.05329	-10.999	-13.5576	2013-08-02 16:29:15
2013-08-02 16:39:15	10.81	13.33		2.06023	-11.0194	-13.5882
2013-08-02 16:49:15	10.83	13.35		2.06717	-11.0398	-13.6086
2013-08-02 16:59:15	10.89	13.4		2.07412	-11.1009	-13.6595
2013-08-02 17:09:15	10.93	13.44		2.08106	-11.1417	-13.7003
2013-08-02 17:19:15	10.96	13.47		2.08801	-11.1723	-13.7309
2013-08-02 17:29:15	11	13.51		2.09495	-11.213	-13.7717	2013-08-02 17:29:15
2013-08-02 17:39:15	11.02	13.53		2.1019	-11.2334	-13.792
2013-08-02 17:49:15	11.06	13.57		2.10884	-11.2742	-13.8328
2013-08-02 17:59:15	11.09	13.6		2.11579	-11.3048	-13.8634
2013-08-02 18:09:15	11.15	13.67		2.12273	-11.366	-13.9348
2013-08-02 18:19:15	11.13	13.64		2.12967	-11.3456	-13.9042
2013-08-02 18:29:15	11.1	13.61		2.13662	-11.315	-13.8736	2013-08-02 18:29:15
2013-08-02 18:39:15	11.19	13.7		2.14356	-11.4067	-13.9653
2013-08-02 18:49:15	11.22	13.74		2.15051	-11.4373	-14.0061
2013-08-02 18:59:15	11.28	13.78		2.15745	-11.4985	-14.0469
2013-08-02 19:09:15	11.3	13.81		2.1644	-11.5189	-14.0775
2013-08-02 19:19:15	11.31	13.83		2.17134	-11.5291	-14.0979
2013-08-02 19:29:15	11.35	13.86		2.17829	-11.5698	-14.1284	2013-08-02 19:29:15
2013-08-02 19:39:15	11.41	13.91		2.18523	-11.631	-14.1794
2013-08-02 19:59:15	11.23	13.72		2.19912	-11.4475	-13.9857
2013-08-02 20:09:15	11.41	13.93		2.20606	-11.631	-14.1998
2013-08-02 20:19:15	11.48	14		2.21301	-11.7023	-14.2712
2013-08-02 20:29:15	11.52	14.03		2.21995	-11.7431	-14.3017
2013-08-02 20:39:15	11.55	14.06		2.2269	-11.7737	-14.3323	2013-08-02 20:39:15
2013-08-02 20:49:15	11.56	14.07		2.23384	-11.7839	-14.3425
2013-08-02 20:59:15	11.58	14.08		2.24079	-11.8043	-14.3527
2013-08-02 21:09:15	11.62	14.11		2.24773	-11.8451	-14.3833
2013-08-02 21:19:15	11.66	14.15		2.25467	-11.8858	-14.4241
2013-08-02 21:29:15	11.68	14.19		2.26162	-11.9062	-14.4648
2013-08-02 21:39:15	11.71	14.22		2.26856	-11.9368	-14.4954	2013-08-02 21:39:15
2013-08-02 21:49:15	11.65	14.15		2.27551	-11.8756	-14.4241
2013-08-02 21:59:15	11.74	14.25		2.28245	-11.9674	-14.526
2013-08-02 22:09:15	11.76	14.27		2.2894	-11.9878	-14.5464
2013-08-02 22:19:15	11.7	14.21		2.29634	-11.9266	-14.4852
2013-08-02 22:29:15	11.71	14.22		2.30329	-11.9368	-14.4954
2013-08-02 22:39:15	11.79	14.3		2.31023	-12.0183	-14.577	2013-08-02 22:39:15
2013-08-02 22:49:15	11.81	14.32		2.31717	-12.0387	-14.5973
2013-08-02 22:59:15	11.83	14.33		2.32412	-12.0591	-14.6075
2013-08-02 23:09:15	11.88	14.37		2.33106	-12.1101	-14.6483
2013-08-02 23:19:15	11.89	14.4		2.33801	-12.1203	-14.6789
2013-08-02 23:29:15	11.9	14.41		2.34495	-12.1305	-14.6891
2013-08-02 23:39:15	11.92	14.43		2.3519	-12.1509	-14.7095	2013-08-02 23:39:15
2013-08-02 23:49:15	11.94	14.44		2.35884	-12.1713	-14.7197
2013-08-02 23:59:15	11.97	14.47		2.36579	-12.2018	-14.7503
2013-08-03 00:09:15	11.99	14.51		2.37273	-12.2222	-14.791
2013-08-03 00:19:15	12.02	14.53		2.37967	-12.2528	-14.8114
2013-08-03 00:29:15	12.02	14.54		2.38662	-12.2528	-14.8216
2013-08-03 00:39:15	12.06	14.57		2.39356	-12.2936	-14.8522	2013-08-03 00:39:15
2013-08-03 00:49:15	12.02	14.53		2.40051	-12.2528	-14.8114
2013-08-03 00:59:15	12.05	14.56		2.40745	-12.2834	-14.842
2013-08-03 01:09:15	12.11	14.61		2.4144	-12.3445	-14.893
2013-08-03 01:19:15	12.13	14.64		2.42134	-12.3649	-14.9235
2013-08-03 01:29:15	12.15	14.65		2.42829	-12.3853	-14.9337
2013-08-03 01:39:15	12.16	14.67		2.43523	-12.3955	-14.9541	2013-08-03 01:39:15
2013-08-03 01:49:15	12.15	14.66		2.44217	-12.3853	-14.9439
2013-08-03 01:59:15	12.21	14.72		2.44912	-12.4465	-15.0051
2013-08-03 02:09:15	12.22	14.71		2.45606	-12.4567	-14.9949
2013-08-03 02:19:15	12.23	14.73		2.46301	-12.4669	-15.0153
2013-08-03 02:29:15	12.23	14.74		2.46995	-12.4669	-15.0255
2013-08-03 02:39:15	12.25	14.76		2.4769	-12.4873	-15.0459	2013-08-03 02:39:15
2013-08-03 02:49:15	12.26	14.77		2.48384	-12.4975	-15.0561
2013-08-03 02:59:15	12.25	14.77		2.49079	-12.4873	-15.0561
2013-08-03 03:09:15	12.27	14.78		2.49773	-12.5076	-15.0663
2013-08-03 03:19:15	12.3	14.8		2.50467	-12.5382	-15.0866
2013-08-03 03:29:15	12.31	14.83		2.51162	-12.5484	-15.1172
2013-08-03 03:39:15	12.33	14.83		2.51856	-12.5688	-15.1172	2013-08-03 03:39:15
2013-08-03 03:49:15	12.31	14.82		2.52551	-12.5484	-15.107
2013-08-03 03:59:15	12.35	14.86		2.53245	-12.5892	-15.1478
2013-08-03 04:09:15	12.36	14.86		2.5394	-12.5994	-15.1478
2013-08-03 04:19:15	12.38	14.89		2.54634	-12.6198	-15.1784
2013-08-03 04:29:15	12.38	14.91		2.55329	-12.6198	-15.1988
2013-08-03 04:39:15	12.4	14.92		2.56023	-12.6402	-15.209	2013-08-03 04:39:15
2013-08-03 04:49:15	12.43	14.95		2.56717	-12.6707	-15.2396
2013-08-03 04:59:15	12.43	14.95		2.57412	-12.6707	-15.2396
2013-08-03 05:09:15	12.45	14.97		2.58106	-12.6911	-15.2599
2013-08-03 05:19:15	12.47	15		2.58801	-12.7115	-15.2905
2013-08-03 05:29:15	12.49	15.01		2.59495	-12.7319	-15.3007
2013-08-03 05:39:15	12.51	15.04		2.6019	-12.7523	-15.3313	2013-08-03 05:39:15
2013-08-03 05:49:15	12.53	15.04		2.60884	-12.7727	-15.3313
2013-08-03 05:59:15	12.54	15.06		2.61579	-12.7829	-15.3517
2013-08-03 06:09:15	12.54	15.07		2.62273	-12.7829	-15.3619
2013-08-03 06:19:15	12.56	15.07		2.62967	-12.8033	-15.3619
2013-08-03 06:29:15	12.6	15.12		2.63662	-12.844	-15.4128
2013-08-03 06:39:15	12.58	15.1		2.64356	-12.8236	-15.3925	2013-08-03 06:39:15
2013-08-03 06:49:15	12.62	15.14		2.65051	-12.8644	-15.4332
2013-08-03 06:59:15	12.64	15.16		2.65745	-12.8848	-15.4536
2013-08-03 07:09:15	12.3	14.82		2.6644	-12.5382	-15.107
2013-08-03 07:19:15	12.43	14.96		2.67134	-12.6707	-15.2497
2013-08-03 07:29:15	12.54	15.06		2.67829	-12.7829	-15.3517
2013-08-03 07:49:15	12.58	15.11		2.69217	-12.8236	-15.4027	2013-08-03 07:49:15
2013-08-03 07:59:15	12.61	15.13		2.69912	-12.8542	-15.423
2013-08-03 08:09:15	12.65	15.16		2.70606	-12.895	-15.4536
2013-08-03 08:19:15	12.68	15.2		2.71301	-12.9256	-15.4944
2013-08-03 08:29:15	12.7	15.22		2.71995	-12.946	-15.5148
2013-08-03 08:39:15	12.73	15.25		2.7269	-12.9766	-15.5454
2013-08-03 08:49:15	12.77	15.29		2.73384	-13.0173	-15.5861	2013-08-03 08:49:15
2013-08-03 08:59:15	12.78	15.31		2.74079	-13.0275	-15.6065
2013-08-03 09:09:15	12.8	15.32		2.74773	-13.0479	-15.6167
2013-08-03 09:19:15	12.84	15.35		2.75467	-13.0887	-15.6473
2013-08-03 09:29:15	12.86	15.38		2.76162	-13.1091	-15.6779
2013-08-03 09:39:15	12.86	15.38		2.76856	-13.1091	-15.6779
2013-08-03 09:49:15	12.89	15.41		2.77551	-13.1397	-15.7085	2013-08-03 09:49:15
2013-08-03 09:59:15	12.9	15.42		2.78245	-13.1498	-15.7187
2013-08-03 10:09:15	12.9	15.41		2.7894	-13.1498	-15.7085
2013-08-03 10:19:15	12.92	15.44		2.79634	-13.1702	-15.739
2013-08-03 10:29:15	12.89	15.41		2.80329	-13.1397	-15.7085
2013-08-03 10:39:15	12.9	15.42		2.81023	-13.1498	-15.7187
2013-08-03 10:49:15	12.92	15.45		2.81717	-13.1702	-15.7492	2013-08-03 10:49:15
2013-08-03 10:59:15	12.98	15.49		2.82412	-13.2314	-15.79
2013-08-03 11:09:15	12.93	15.45		2.83106	-13.1804	-15.7492
2013-08-03 11:19:15	12.99	15.51		2.83801	-13.2416	-15.8104
2013-08-03 11:29:15	12.99	15.51		2.84495	-13.2416	-15.8104
2013-08-03 11:39:15	13.01	15.53		2.8519	-13.262	-15.8308
2013-08-03 11:49:15	12.99	15.51		2.85884	-13.2416	-15.8104	2013-08-03 11:49:15
2013-08-03 11:59:15	13.03	15.55		2.86579	-13.2824	-15.8512
2013-08-03 12:09:15	13.06	15.58		2.87273	-13.3129	-15.8818
2013-08-03 12:19:15	13.09	15.61		2.87967	-13.3435	-15.9123
2013-08-03 12:29:15	13.04	15.56		2.88662	-13.2926	-15.8614
2013-08-03 12:39:15	13.09	15.61		2.89356	-13.3435	-15.9123
2013-08-03 12:49:15	13.1	15.63		2.90051	-13.3537	-15.9327	2013-08-03 12:49:15
2013-08-03 12:59:15	13.12	15.64		2.90745	-13.3741	-15.9429
2013-08-03 13:09:15	13.16	15.67		2.9144	-13.4149	-15.9735
2013-08-03 13:19:15	13.18	15.7		2.92134	-13.4353	-16.0041
2013-08-03 13:29:15	13.19	15.72		2.92829	-13.4455	-16.0245
2013-08-03 13:39:15	13.23	15.74		2.93523	-13.4862	-16.0449
2013-08-03 13:49:15	13.23	15.74		2.94217	-13.4862	-16.0449	2013-08-03 13:49:15
2013-08-03 13:59:15	13.22	15.72		2.94912	-13.476	-16.0245
2013-08-03 14:09:15	13.25	15.77		2.95606	-13.5066	-16.0754
2013-08-03 14:19:15	13.27	15.8		2.96301	-13.527	-16.106
2013-08-03 14:29:15	13.31	15.83		2.96995	-13.5678	-16.1366
2013-08-03 14:39:15	13.3	15.84		2.9769	-13.5576	-16.1468
2013-08-03 14:49:15	13.31	15.83		2.98384	-13.5678	-16.1366	2013-08-03 14:49:15
2013-08-03 14:59:15	13.34	15.86		2.99079	-13.5984	-16.1672
2013-08-03 15:19:15	12.84	15.38		3.00467	-13.0887	-15.6779
2013-08-03 15:29:15	13	15.54		3.01162	-13.2518	-15.841
2013-08-03 15:39:15	13.16	15.7		3.01856	-13.4149	-16.0041
2013-08-03 15:49:15	13.29	15.83		3.02551	-13.5474	-16.1366
2013-08-03 15:59:15	13.38	15.93		3.03245	-13.6391	-16.2385	2013-08-03 15:59:15
2013-08-03 16:09:15	13.41	15.94		3.0394	-13.6697	-16.2487
2013-08-03 16:19:15	13.43	15.97		3.04634	-13.6901	-16.2793
2013-08-03 16:29:15	13.45	15.99		3.05329	-13.7105	-16.2997
2013-08-03 16:39:15	13.47	15.99		3.06023	-13.7309	-16.2997
2013-08-03 16:49:15	13.48	16.01		3.06717	-13.7411	-16.3201
2013-08-03 16:59:15	13.42	15.95		3.07412	-13.6799	-16.2589	2013-08-03 16:59:15
2013-08-03 17:09:15	13.48	16.01		3.08106	-13.7411	-16.3201
2013-08-03 17:19:15	13.49	16.03		3.08801	-13.7513	-16.3405
2013-08-03 17:29:15	13.51	16.05		3.09495	-13.7717	-16.3609
2013-08-03 17:39:15	13.53	16.08		3.1019	-13.792	-16.3914
2013-08-03 17:49:15	13.55	16.08		3.10884	-13.8124	-16.3914
2013-08-03 17:59:15	13.57	16.11		3.11579	-13.8328	-16.422	2013-08-03 17:59:15
2013-08-03 18:09:15	13.6	16.13		3.12273	-13.8634	-16.4424
2013-08-03 18:19:15	13.59	16.13		3.12967	-13.8532	-16.4424
2013-08-03 18:29:15	13.57	16.11		3.13662	-13.8328	-16.422
2013-08-03 18:39:15	13.59	16.12		3.14356	-13.8532	-16.4322
2013-08-03 18:49:15	13.57	16.11		3.15051	-13.8328	-16.422
2013-08-03 18:59:15	13.61	16.13		3.15745	-13.8736	-16.4424	2013-08-03 18:59:15
2013-08-03 19:09:15	13.62	16.16		3.1644	-13.8838	-16.473
2013-08-03 19:19:15	13.65	16.18		3.17134	-13.9144	-16.4934
2013-08-03 19:29:15	13.59	16.13		3.17829	-13.8532	-16.4424
2013-08-03 19:39:15	13.53	16.06		3.18523	-13.792	-16.371
2013-08-03 19:49:15	13.6	16.14		3.19217	-13.8634	-16.4526
2013-08-03 19:59:15	13.65	16.19		3.19912	-13.9144	-16.5036	2013-08-03 19:59:15
2013-08-03 20:09:15	13.68	16.21		3.20606	-13.945	-16.524
2013-08-03 20:19:15	13.67	16.21		3.21301	-13.9348	-16.524
2013-08-03 20:29:15	13.69	16.23		3.21995	-13.9551	-16.5443
2013-08-03 20:39:15	13.72	16.26		3.2269	-13.9857	-16.5749
2013-08-03 20:49:15	13.72	16.26		3.23384	-13.9857	-16.5749
2013-08-03 20:59:15	13.72	16.26		3.24079	-13.9857	-16.5749	2013-08-03 20:59:15
2013-08-03 21:19:15	13.35	15.88		3.25467	-13.6086	-16.1876
2013-08-03 21:29:15	13.43	15.99		3.26162	-13.6901	-16.2997
2013-08-03 21:39:15	13.54	16.08		3.26856	-13.8022	-16.3914
2013-08-03 21:49:15	13.65	16.17		3.27551	-13.9144	-16.4832
2013-08-03 21:59:15	13.73	16.26		3.28245	-13.9959	-16.5749
2013-08-03 22:09:15	13.78	16.31		3.2894	-14.0469	-16.6259	2013-08-03 22:09:15
2013-08-03 22:19:15	13.8	16.33		3.29634	-14.0673	-16.6463
2013-08-03 22:29:15	13.82	16.36		3.30329	-14.0877	-16.6769
2013-08-03 22:39:15	13.84	16.37		3.31023	-14.1081	-16.6871
2013-08-03 22:49:15	13.85	16.39		3.31717	-14.1182	-16.7074
2013-08-03 22:59:15	13.87	16.41		3.32412	-14.1386	-16.7278
2013-08-03 23:09:15	13.89	16.43		3.33106	-14.159	-16.7482	2013-08-03 23:09:15
2013-08-03 23:19:15	13.92	16.45		3.33801	-14.1896	-16.7686
2013-08-03 23:39:15	13.96	16.49		3.3519	-14.2304	-16.8094
2013-08-03 23:49:15	13.98	16.5		3.35884	-14.2508	-16.8196
2013-08-03 23:59:15	13.99	16.54		3.36579	-14.261	-16.8603
2013-08-04 00:09:15	14	16.53		3.37273	-14.2712	-16.8502
2013-08-04 00:19:15	14.01	16.55		3.37967	-14.2813	-16.8705	2013-08-04 00:19:15
2013-08-04 00:29:15	14.03	16.56		3.38662	-14.3017	-16.8807
2013-08-04 00:39:15	14.06	16.59		3.39356	-14.3323	-16.9113
2013-08-04 00:49:15	14.07	16.6		3.40051	-14.3425	-16.9215
2013-08-04 00:59:15	14.08	16.62		3.40745	-14.3527	-16.9419
2013-08-04 01:09:15	14.08	16.62		3.4144	-14.3527	-16.9419
2013-08-04 01:19:15	14.11	16.65		3.42134	-14.3833	-16.9725	2013-08-04 01:19:15
2013-08-04 01:29:15	14.12	16.64		3.42829	-14.3935	-16.9623
2013-08-04 01:39:15	14.13	16.67		3.43523	-14.4037	-16.9929
2013-08-04 01:49:15	14.14	16.68		3.44217	-14.4139	-17.0031
2013-08-04 01:59:15	14.16	16.7		3.44912	-14.4343	-17.0234
2013-08-04 02:09:15	14.17	16.71		3.45606	-14.4444	-17.0336
2013-08-04 02:19:15	14.11	16.65		3.46301	-14.3833	-16.9725	2013-08-04 02:19:15
2013-08-04 02:29:15	14.18	16.72		3.46995	-14.4546	-17.0438
2013-08-04 02:39:15	14.21	16.75		3.4769	-14.4852	-17.0744
2013-08-04 02:49:15	14.22	16.76		3.48384	-14.4954	-17.0846
2013-08-04 02:59:15	14.25	16.78		3.49079	-14.526	-17.105
2013-08-04 03:09:15	14.25	16.79		3.49773	-14.526	-17.1152
2013-08-04 03:19:15	14.27	16.8		3.50467	-14.5464	-17.1254	2013-08-04 03:19:15
2013-08-04 03:29:15	14.29	16.84		3.51162	-14.5668	-17.1662
2013-08-04 03:39:15	14.31	16.83		3.51856	-14.5872	-17.156
2013-08-04 03:49:15	14.33	16.86		3.52551	-14.6075	-17.1865
2013-08-04 03:59:15	14.33	16.87		3.53245	-14.6075	-17.1967
2013-08-04 04:09:15	14.34	16.88		3.5394	-14.6177	-17.2069
2013-08-04 04:19:15	14.37	16.89		3.54634	-14.6483	-17.2171	2013-08-04 04:19:15
2013-08-04 04:29:15	14.37	16.91		3.55329	-14.6483	-17.2375
2013-08-04 04:39:15	14.4	16.93		3.56023	-14.6789	-17.2579
2013-08-04 04:49:15	14.38	16.93		3.56717	-14.6585	-17.2579
2013-08-04 04:59:15	14.41	16.95		3.57412	-14.6891	-17.2783
2013-08-04 05:09:15	14.42	16.96		3.58106	-14.6993	-17.2885
2013-08-04 05:19:15	14.43	16.98		3.58801	-14.7095	-17.3089	2013-08-04 05:19:15
2013-08-04 05:29:15	14.45	16.99		3.59495	-14.7299	-17.3191
2013-08-04 05:39:15	14.45	17		3.6019	-14.7299	-17.3293
2013-08-04 05:49:15	14.47	17.02		3.60884	-14.7503	-17.3496
2013-08-04 05:59:15	14.5	17.03		3.61579	-14.7808	-17.3598
2013-08-04 06:09:15	14.5	17.04		3.62273	-14.7808	-17.37
2013-08-04 06:19:15	14.5	17.05		3.62967	-14.7808	-17.3802	2013-08-04 06:19:15
2013-08-04 06:29:15	14.52	17.06		3.63662	-14.8012	-17.3904
2013-08-04 06:39:15	14.53	17.07		3.64356	-14.8114	-17.4006
2013-08-04 06:49:15	14.54	17.08		3.65051	-14.8216	-17.4108
2013-08-04 06:59:15	14.56	17.1		3.65745	-14.842	-17.4312
2013-08-04 07:09:15	14.56	17.11		3.6644	-14.842	-17.4414
2013-08-04 07:19:15	14.58	17.12		3.67134	-14.8624	-17.4516	2013-08-04 07:19:15
2013-08-04 07:29:15	14.61	17.13		3.67829	-14.893	-17.4618
2013-08-04 07:39:15	14.61	17.14		3.68523	-14.893	-17.472
2013-08-04 07:49:15	14.62	17.17		3.69217	-14.9032	-17.5025
2013-08-04 07:59:15	14.64	17.18		3.69912	-14.9235	-17.5127
2013-08-04 08:09:15	14.64	17.19		3.70606	-14.9235	-17.5229
2013-08-04 08:19:15	14.65	17.2		3.71301	-14.9337	-17.5331	2013-08-04 08:19:15
2013-08-04 08:29:15	14.66	17.21		3.71995	-14.9439	-17.5433
2013-08-04 08:39:15	14.67	17.21		3.7269	-14.9541	-17.5433
2013-08-04 08:49:15	14.68	17.23		3.73384	-14.9643	-17.5637
2013-08-04 08:59:15	14.72	17.26		3.74079	-15.0051	-17.5943
2013-08-04 09:09:15	14.72	17.27		3.74773	-15.0051	-17.6045
2013-08-04 09:19:15	14.73	17.29		3.75467	-15.0153	-17.6249	2013-08-04 09:19:15
2013-08-04 09:39:15	14.76	17.32		3.76856	-15.0459	-17.6555
2013-08-04 09:49:15	14.78	17.32		3.77551	-15.0663	-17.6555
2013-08-04 09:59:15	14.79	17.33		3.78245	-15.0765	-17.6656
2013-08-04 10:09:15	14.81	17.35		3.7894	-15.0968	-17.686
2013-08-04 10:19:15	13.87	16.42		3.79634	-14.1386	-16.738
2013-08-04 10:29:15	14.03	16.58		3.80329	-14.3017	-16.9011	2013-08-04 10:29:15
2013-08-04 10:39:15	14.12	16.67		3.81023	-14.3935	-16.9929
2013-08-04 10:49:15	14.23	16.78		3.81717	-14.5056	-17.105
2013-08-04 10:59:15	14.33	16.88		3.82412	-14.6075	-17.2069
2013-08-04 11:09:15	14.4	16.95		3.83106	-14.6789	-17.2783
2013-08-04 11:19:15	14.48	17.04		3.83801	-14.7604	-17.37
2013-08-04 11:29:15	14.57	17.12		3.84495	-14.8522	-17.4516	2013-08-04 11:29:15
2013-08-04 11:39:15	14.62	17.17		3.8519	-14.9032	-17.5025
2013-08-04 11:49:15	14.71	17.27		3.85884	-14.9949	-17.6045
2013-08-04 11:59:15	14.75	17.31		3.86579	-15.0357	-17.6453
2013-08-04 12:09:15	14.8	17.35		3.87273	-15.0866	-17.686
2013-08-04 12:19:15	14.81	17.37		3.87967	-15.0968	-17.7064
2013-08-04 12:29:15	14.84	17.39		3.88662	-15.1274	-17.7268	2013-08-04 12:29:15
2013-08-04 12:39:15	14.89	17.44		3.89356	-15.1784	-17.7778
2013-08-04 12:49:15	14.89	17.45		3.90051	-15.1784	-17.788
2013-08-04 12:59:15	14.92	17.47		3.90745	-15.209	-17.8084
2013-08-04 13:09:15	14.92	17.47		3.9144	-15.209	-17.8084
2013-08-04 13:19:15	14.96	17.51		3.92134	-15.2497	-17.8491
2013-08-04 13:29:15	14.98	17.52		3.92829	-15.2701	-17.8593	2013-08-04 13:29:15
2013-08-04 13:39:15	15	17.54		3.93523	-15.2905	-17.8797
2013-08-04 13:49:15	15	17.55		3.94217	-15.2905	-17.8899
2013-08-04 13:59:15	15	17.56		3.94912	-15.2905	-17.9001
2013-08-04 14:09:15	15.03	17.58		3.95606	-15.3211	-17.9205
2013-08-04 14:29:15	15.07	17.61		3.96995	-15.3619	-17.9511
2013-08-04 14:39:15	15.05	17.61		3.9769	-15.3415	-17.9511	2013-08-04 14:39:15
2013-08-04 14:59:15	15.12	17.67		3.99079	-15.4128	-18.0122
2013-08-04 15:09:15	15.13	17.69		3.99773	-15.423	-18.0326
2013-08-04 15:19:15	15.16	17.71		4.00467	-15.4536	-18.053
2013-08-04 15:29:15	15.18	17.73		4.01162	-15.474	-18.0734
2013-08-04 15:39:15	15.2	17.74		4.01856	-15.4944	-18.0836
2013-08-04 15:49:15	15.18	17.74		4.02551	-15.474	-18.0836	2013-08-04 15:49:15
2013-08-04 15:59:15	15.18	17.74		4.03245	-15.474	-18.0836
2013-08-04 16:09:15	15.22	17.78		4.0394	-15.5148	-18.1244
2013-08-04 16:19:15	15.23	17.78		4.04634	-15.525	-18.1244
2013-08-04 16:29:15	15.25	17.8		4.05329	-15.5454	-18.1448
2013-08-04 16:39:15	15.29	17.85		4.06023	-15.5861	-18.1957
2013-08-04 16:49:15	15.28	17.84		4.06717	-15.5759	-18.1855	2013-08-04 16:49:15
2013-08-04 16:59:15	15.31	17.87		4.07412	-15.6065	-18.2161
2013-08-04 17:09:15	15.34	17.89		4.08106	-15.6371	-18.2365
2013-08-04 17:19:15	15.26	17.82		4.08801	-15.5556	-18.1651
2013-08-04 17:29:15	15.35	17.9		4.09495	-15.6473	-18.2467
2013-08-04 17:39:15	15.35	17.91		4.1019	-15.6473	-18.2569
2013-08-04 17:49:15	15.38	17.94		4.10884	-15.6779	-18.2875	2013-08-04 17:49:15
2013-08-04 17:59:15	15.41	17.96		4.11579	-15.7085	-18.3078
2013-08-04 18:09:15	15.42	17.98		4.12273	-15.7187	-18.3282
2013-08-04 18:19:15	15.42	17.97		4.12967	-15.7187	-18.318
2013-08-04 18:29:15	15.43	17.98		4.13662	-15.7288	-18.3282
2013-08-04 18:39:15	15.47	18.03		4.14356	-15.7696	-18.3792
2013-08-04 18:49:15	15.5	18.04		4.15051	-15.8002	-18.3894	2013-08-04 18:49:15
2013-08-04 18:59:15	15.52	18.08		4.15745	-15.8206	-18.4302
2013-08-04 19:09:15	15.54	18.09		4.1644	-15.841	-18.4404
2013-08-04 19:19:15	15.55	18.11		4.17134	-15.8512	-18.4608
2013-08-04 19:29:15	15.58	18.14		4.17829	-15.8818	-18.4913
2013-08-04 19:39:15	15.61	18.17		4.18523	-15.9123	-18.5219
2013-08-04 19:49:15	15.62	18.18		4.19217	-15.9225	-18.5321	2013-08-04 19:49:15
2013-08-04 19:59:15	15.65	18.2		4.19912	-15.9531	-18.5525
2013-08-04 20:09:15	15.67	18.23		4.20606	-15.9735	-18.5831
2013-08-04 20:29:15	15.35	17.9		4.21995	-15.6473	-18.2467
2013-08-04 20:39:15	15.52	18.08		4.2269	-15.8206	-18.4302
2013-08-04 20:49:15	15.61	18.17		4.23384	-15.9123	-18.5219
2013-08-04 20:59:15	15.64	18.21		4.24079	-15.9429	-18.5627	2013-08-04 20:59:15
2013-08-04 21:09:15	15.7	18.26		4.24773	-16.0041	-18.6137
2013-08-04 21:19:15	15.69	18.25		4.25467	-15.9939	-18.6035
2013-08-04 21:29:15	15.73	18.28		4.26162	-16.0347	-18.634
2013-08-04 21:39:15	15.7	18.26		4.26856	-16.0041	-18.6137
2013-08-04 21:49:15	15.72	18.28		4.27551	-16.0245	-18.634
2013-08-04 21:59:15	15.75	18.3		4.28245	-16.055	-18.6544	2013-08-04 21:59:15
2013-08-04 22:09:15	15.77	18.32		4.2894	-16.0754	-18.6748
2013-08-04 22:19:15	15.77	18.34		4.29634	-16.0754	-18.6952
2013-08-04 22:29:15	15.8	18.35		4.30329	-16.106	-18.7054
2013-08-04 22:39:15	15.78	18.33		4.31023	-16.0856	-18.685
2013-08-04 22:49:15	15.78	18.35		4.31717	-16.0856	-18.7054
2013-08-04 22:59:15	15.8	18.35		4.32412	-16.106	-18.7054	2013-08-04 22:59:15
2013-08-04 23:09:15	15.8	18.37		4.33106	-16.106	-18.7258
2013-08-04 23:19:15	15.83	18.39		4.33801	-16.1366	-18.7462
2013-08-04 23:29:15	15.84	18.4		4.34495	-16.1468	-18.7564
2013-08-04 23:39:15	15.86	18.42		4.3519	-16.1672	-18.7768
2013-08-04 23:49:15	15.87	18.43		4.35884	-16.1774	-18.787
2013-08-04 23:59:15	15.86	18.41		4.36579	-16.1672	-18.7666	2013-08-04 23:59:15
2013-08-05 00:09:15	15.89	18.44		4.37273	-16.1978	-18.7971
2013-08-05 00:19:15	15.9	18.46		4.37967	-16.208	-18.8175
2013-08-05 00:29:15	15.9	18.46		4.38662	-16.208	-18.8175
2013-08-05 00:39:15	15.92	18.48		4.39356	-16.2283	-18.8379
2013-08-05 00:49:15	15.93	18.49		4.40051	-16.2385	-18.8481
2013-08-05 00:59:15	15.94	18.5		4.40745	-16.2487	-18.8583	2013-08-05 00:59:15
2013-08-05 01:09:15	15.95	18.52		4.4144	-16.2589	-18.8787
2013-08-05 01:19:15	15.97	18.53		4.42134	-16.2793	-18.8889
2013-08-05 01:29:15	15.98	18.56		4.42829	-16.2895	-18.9195
2013-08-05 01:39:15	16	18.56		4.43523	-16.3099	-18.9195
2013-08-05 01:49:15	16.01	18.57		4.44217	-16.3201	-18.9297
2013-08-05 01:59:15	16.02	18.59		4.44912	-16.3303	-18.9501	2013-08-05 01:59:15
2013-08-05 02:09:15	16.03	18.6		4.45606	-16.3405	-18.9602
2013-08-05 02:19:15	16.05	18.61		4.46301	-16.3609	-18.9704
2013-08-05 02:29:15	16.05	18.62		4.46995	-16.3609	-18.9806
2013-08-05 02:39:15	16.06	18.62		4.4769	-16.371	-18.9806
2013-08-05 02:49:15	16.07	18.64		4.48384	-16.3812	-19.001
2013-08-05 02:59:15	16.1	18.66		4.49079	-16.4118	-19.0214	2013-08-05 02:59:15
2013-08-05 03:09:15	16.09	18.66		4.49773	-16.4016	-19.0214
2013-08-05 03:19:15	16.11	18.68		4.50467	-16.422	-19.0418
2013-08-05 03:29:15	16.1	18.67		4.51162	-16.4118	-19.0316
2013-08-05 03:39:15	16.12	18.69		4.51856	-16.4322	-19.052
2013-08-05 03:49:15	16.15	18.71		4.52551	-16.4628	-19.0724
2013-08-05 03:59:15	16.15	18.71		4.53245	-16.4628	-19.0724	2013-08-05 03:59:15
2013-08-05 04:09:15	16.17	18.73		4.5394	-16.4832	-19.0928
2013-08-05 04:19:15	16.19	18.75		4.54634	-16.5036	-19.1131
2013-08-05 04:29:15	16.2	18.77		4.55329	-16.5138	-19.1335
2013-08-05 04:39:15	16.22	18.91		4.56023	-16.5341	-19.2762
2013-08-05 04:49:15	16.24	18.9		4.56717	-16.5545	-19.2661
2013-08-05 04:59:15	16.24	18.91		4.57412	-16.5545	-19.2762	2013-08-05 04:59:15
2013-08-05 05:09:15	16.26	18.94		4.58106	-16.5749	-19.3068
2013-08-05 05:19:15	16.28	18.96		4.58801	-16.5953	-19.3272
2013-08-05 05:29:15	16.3	19.01		4.59495	-16.6157	-19.3782
2013-08-05 05:39:15	16.32	19.02		4.6019	-16.6361	-19.3884
2013-08-05 05:49:15	16.33	19.05		4.60884	-16.6463	-19.419
2013-08-05 05:59:15	16.35	19.06		4.61579	-16.6667	-19.4292	2013-08-05 05:59:15
2013-08-05 06:09:15	16.35	19.08		4.62273	-16.6667	-19.4495
2013-08-05 06:19:15	16.39	19.1		4.62967	-16.7074	-19.4699
2013-08-05 06:29:15	16.38	19.1		4.63662	-16.6972	-19.4699
2013-08-05 06:39:15	16.41	19.14		4.64356	-16.7278	-19.5107
2013-08-05 06:49:15	16.14	18.87		4.65051	-16.4526	-19.2355
2013-08-05 06:59:15	16.28	19		4.65745	-16.5953	-19.368	2013-08-05 06:59:15
2013-08-05 07:09:15	16.38	19.11		4.6644	-16.6972	-19.4801
2013-08-05 07:19:15	16.44	19.15		4.67134	-16.7584	-19.5209
2013-08-05 07:29:15	16.43	19.15		4.67829	-16.7482	-19.5209
2013-08-05 07:39:15	16.46	19.18		4.68523	-16.7788	-19.5515
2013-08-05 07:49:15	16.42	19.14		4.69217	-16.738	-19.5107
2013-08-05 07:59:15	16.46	19.19		4.69912	-16.7788	-19.5617	2013-08-05 07:59:15
2013-08-05 08:09:15	16.49	19.21		4.70606	-16.8094	-19.5821
2013-08-05 08:19:15	16.5	19.21		4.71301	-16.8196	-19.5821
2013-08-05 08:29:15	16.52	19.24		4.71995	-16.84	-19.6126
2013-08-05 08:39:15	16.55	19.25		4.7269	-16.8705	-19.6228
2013-08-05 08:49:15	16.24	18.95		4.73384	-16.5545	-19.317
2013-08-05 08:59:15	16.35	19.05		4.74079	-16.6667	-19.419	2013-08-05 08:59:15
2013-08-05 09:09:15	16.41	19.11		4.74773	-16.7278	-19.4801
2013-08-05 09:19:15	16.52	19.22		4.75467	-16.84	-19.5923
2013-08-05 09:29:15	16.56	19.25		4.76162	-16.8807	-19.6228
2013-08-05 09:39:15	16.61	19.3		4.76856	-16.9317	-19.6738
2013-08-05 09:49:15	16.61	19.3		4.77551	-16.9317	-19.6738
2013-08-05 09:59:15	16.65	19.33		4.78245	-16.9725	-19.7044	2013-08-05 09:59:15
2013-08-05 10:09:15	16.64	19.32		4.7894	-16.9623	-19.6942
2013-08-05 10:19:15	16.67	19.35		4.79634	-16.9929	-19.7248
2013-08-05 10:29:15	16.69	19.37		4.80329	-17.0133	-19.7452
2013-08-05 10:39:15	16.71	19.39		4.81023	-17.0336	-19.7655
2013-08-05 10:49:15	16.74	19.41		4.81717	-17.0642	-19.7859
2013-08-05 10:59:15	16.77	19.43		4.82412	-17.0948	-19.8063	2013-08-05 10:59:15
2013-08-05 11:09:15	16.78	19.45		4.83106	-17.105	-19.8267
2013-08-05 11:19:15	16.81	19.46		4.83801	-17.1356	-19.8369
2013-08-05 11:29:15	16.81	19.47		4.84495	-17.1356	-19.8471
2013-08-05 11:39:15	16.81	19.46		4.8519	-17.1356	-19.8369
2013-08-05 11:49:15	16.83	19.49		4.85884	-17.156	-19.8675
2013-08-05 11:59:15	16.87	19.51		4.86579	-17.1967	-19.8879	2013-08-05 11:59:15
2013-08-05 12:09:15	16.86	19.52		4.87273	-17.1865	-19.8981
2013-08-05 12:19:15	16.89	19.53		4.87967	-17.2171	-19.9083
2013-08-05 12:29:15	16.91	19.55		4.88662	-17.2375	-19.9286
2013-08-05 12:39:15	16.93	19.57		4.89356	-17.2579	-19.949
2013-08-05 12:49:15	16.95	19.58		4.90051	-17.2783	-19.9592
2013-08-05 12:59:15	16.96	19.59		4.90745	-17.2885	-19.9694	2013-08-05 12:59:15
2013-08-05 13:09:15	17	19.62		4.9144	-17.3293	-20
2013-08-05 13:19:15	16.99	19.61		4.92134	-17.3191	-19.9898
2013-08-05 13:29:15	16.79	19.38		4.92829	-17.1152	-19.7554
2013-08-05 13:39:15	16.82	19.43		4.93523	-17.1458	-19.8063
2013-08-05 13:49:15	16.97	19.57		4.94217	-17.2987	-19.949
2013-08-05 13:59:15	17.07	19.68		4.94912	-17.4006	-20.0612	2013-08-05 13:59:15
2013-08-05 14:09:15	17.1	19.7		4.95606	-17.4312	-20.0815
2013-08-05 14:19:15	17.14	19.73		4.96301	-17.472	-20.1121
2013-08-05 14:29:15	17.16	19.76		4.96995	-17.4924	-20.1427
2013-08-05 14:39:15	17.18	19.77		4.9769	-17.5127	-20.1529
2013-08-05 14:49:15	17.2	19.8		4.98384	-17.5331	-20.1835
2013-08-05 14:59:15	17.2	19.78		4.99079	-17.5331	-20.1631	2013-08-05 14:59:15
2013-08-05 15:09:15	17.24	19.82		4.99773	-17.5739	-20.2039
2013-08-05 15:19:15	17.3	19.87		5.00467	-17.6351	-20.2548
2013-08-05 15:29:15	17.32	19.89		5.01162	-17.6555	-20.2752
2013-08-05 15:49:15	17.35	19.91		5.02551	-17.686	-20.2956
2013-08-05 15:59:15	17.37	19.94		5.03245	-17.7064	-20.3262
2013-08-05 16:09:15	17.41	19.97		5.0394	-17.7472	-20.3568	2013-08-05 16:09:15
2013-08-05 16:19:15	17.44	19.98		5.04634	-17.7778	-20.367
2013-08-05 16:29:15	17.45	20.01		5.05329	-17.788	-20.3976
2013-08-05 16:39:15	17.49	20.03		5.06023	-17.8287	-20.4179
2013-08-05 16:49:15	17.5	20.04		5.06717	-17.8389	-20.4281
2013-08-05 16:59:15	17.52	20.06		5.07412	-17.8593	-20.4485
2013-08-05 17:09:15	17.55	20.09		5.08106	-17.8899	-20.4791	2013-08-05 17:09:15
2013-08-05 17:19:15	17.59	20.13		5.08801	-17.9307	-20.5199
2013-08-05 17:29:15	17.58	20.13		5.09495	-17.9205	-20.5199
2013-08-05 17:39:15	17.62	20.16		5.1019	-17.9613	-20.5505
2013-08-05 17:49:15	17.65	20.18		5.10884	-17.9918	-20.5708
2013-08-05 17:59:15	17.67	20.2		5.11579	-18.0122	-20.5912
2013-08-05 18:09:15	17.71	20.24		5.12273	-18.053	-20.632	2013-08-05 18:09:15
2013-08-05 18:19:15	17.67	20.2		5.12967	-18.0122	-20.5912
2013-08-05 18:29:15	17.76	20.29		5.13662	-18.104	-20.683
2013-08-05 18:39:15	17.77	20.3		5.14356	-18.1142	-20.6932
2013-08-05 18:49:15	17.8	20.34		5.15051	-18.1448	-20.7339
2013-08-05 18:59:15	17.83	20.35		5.15745	-18.1753	-20.7441
2013-08-05 19:09:15	17.84	20.37		5.1644	-18.1855	-20.7645	2013-08-05 19:09:15
2013-08-05 19:19:15	17.86	20.39		5.17134	-18.2059	-20.7849
2013-08-05 19:29:15	17.9	20.42		5.17829	-18.2467	-20.8155
2013-08-05 19:39:15	17.93	20.44		5.18523	-18.2773	-20.8359
2013-08-05 19:49:15	17.94	20.47		5.19217	-18.2875	-20.8665
2013-08-05 19:59:15	17.95	20.48		5.19912	-18.2977	-20.8767
2013-08-05 20:09:15	17.96	20.49		5.20606	-18.3078	-20.8869	2013-08-05 20:09:15
2013-08-05 20:19:15	17.99	20.5		5.21301	-18.3384	-20.897
2013-08-05 20:29:15	18.01	20.53		5.21995	-18.3588	-20.9276
2013-08-05 20:39:15	18.02	20.55		5.2269	-18.369	-20.948
2013-08-05 20:49:15	17.36	19.9		5.23384	-17.6962	-20.2854
2013-08-05 20:59:15	17.55	20.09		5.24079	-17.8899	-20.4791
2013-08-05 21:09:15	17.69	20.22		5.24773	-18.0326	-20.6116	2013-08-05 21:09:15
2013-08-05 21:19:15	17.83	20.36		5.25467	-18.1753	-20.7543
2013-08-05 21:29:15	17.95	20.46		5.26162	-18.2977	-20.8563
2013-08-05 21:39:15	17.99	20.52		5.26856	-18.3384	-20.9174
2013-08-05 21:49:15	18.03	20.55		5.27551	-18.3792	-20.948
2013-08-05 21:59:15	18.05	20.59		5.28245	-18.3996	-20.9888
2013-08-05 22:09:15	18.07	20.6		5.2894	-18.42	-20.999	2013-08-05 22:09:15
2013-08-05 22:19:15	18.08	20.6		5.29634	-18.4302	-20.999
2013-08-05 22:29:15	18.11	20.63		5.30329	-18.4608	-21.0296
2013-08-05 22:39:15	18.12	20.65		5.31023	-18.4709	-21.0499
2013-08-05 22:49:15	18.14	20.66		5.31717	-18.4913	-21.0601
2013-08-05 22:59:15	18.15	20.67		5.32412	-18.5015	-21.0703
2013-08-05 23:09:15	18.17	20.7		5.33106	-18.5219	-21.1009	2013-08-05 23:09:15
2013-08-05 23:19:15	18.2	20.72		5.33801	-18.5525	-21.1213
2013-08-05 23:29:15	18.21	20.73		5.34495	-18.5627	-21.1315
2013-08-05 23:39:15	18.22	20.73		5.3519	-18.5729	-21.1315
2013-08-05 23:49:15	18.24	20.75		5.35884	-18.5933	-21.1519
2013-08-05 23:59:15	18.24	20.75		5.36579	-18.5933	-21.1519
2013-08-06 00:09:15	18.25	20.76		5.37273	-18.6035	-21.1621	2013-08-06 00:09:15
2013-08-06 00:19:15	18.29	20.78		5.37967	-18.6442	-21.1825
2013-08-06 00:29:15	18.29	20.81		5.38662	-18.6442	-21.213
2013-08-06 00:39:15	18.31	20.82		5.39356	-18.6646	-21.2232
2013-08-06 00:49:15	18.32	20.82		5.40051	-18.6748	-21.2232
2013-08-06 00:59:15	18.34	20.84		5.40745	-18.6952	-21.2436
2013-08-06 01:09:15	18.35	20.85		5.4144	-18.7054	-21.2538	2013-08-06 01:09:15
2013-08-06 01:19:15	18.36	20.86		5.42134	-18.7156	-21.264
2013-08-06 01:29:15	18.35	20.86		5.42829	-18.7054	-21.264
2013-08-06 01:39:15	18.37	20.89		5.43523	-18.7258	-21.2946
2013-08-06 01:49:15	18.38	20.9		5.44217	-18.736	-21.3048
2013-08-06 01:59:15	18.43	20.92		5.44912	-18.787	-21.3252
2013-08-06 02:09:15	18.42	20.92		5.45606	-18.7768	-21.3252	2013-08-06 02:09:15
2013-08-06 02:19:15	18.42	20.92		5.46301	-18.7768	-21.3252
2013-08-06 02:29:15	18.43	20.94		5.46995	-18.787	-21.3456
2013-08-06 02:39:15	18.45	20.95		5.4769	-18.8073	-21.3558
2013-08-06 02:49:15	18.46	20.97		5.48384	-18.8175	-21.3761
2013-08-06 02:59:15	18.47	20.98		5.49079	-18.8277	-21.3863
2013-08-06 03:09:15	18.48	20.98		5.49773	-18.8379	-21.3863	2013-08-06 03:09:15
2013-08-06 03:19:15	18.5	20.99		5.50467	-18.8583	-21.3965
2013-08-06 03:29:15	18.52	21.02		5.51162	-18.8787	-21.4271
2013-08-06 03:39:15	18.52	21.02		5.51856	-18.8787	-21.4271
2013-08-06 03:49:15	18.55	21.04		5.52551	-18.9093	-21.4475
2013-08-06 03:59:15	18.55	21.04		5.53245	-18.9093	-21.4475
2013-08-06 04:09:15	18.57	21.06		5.5394	-18.9297	-21.4679	2013-08-06 04:09:15
2013-08-06 04:19:15	18.58	21.07		5.54634	-18.9399	-21.4781
2013-08-06 04:29:15	18.61	21.09		5.55329	-18.9704	-21.4985
2013-08-06 04:39:15	18.61	21.1		5.56023	-18.9704	-21.5087
2013-08-06 04:49:15	18.62	21.11		5.56717	-18.9806	-21.5189
2013-08-06 04:59:15	18.63	21.11		5.57412	-18.9908	-21.5189
2013-08-06 05:09:15	18.66	21.13		5.58106	-19.0214	-21.5392	2013-08-06 05:09:15
2013-08-06 05:19:15	18.66	21.14		5.58801	-19.0214	-21.5494
2013-08-06 05:29:15	18.68	21.15		5.59495	-19.0418	-21.5596
2013-08-06 05:39:15	18.67	21.15		5.6019	-19.0316	-21.5596
2013-08-06 05:49:15	18.68	21.16		5.60884	-19.0418	-21.5698
2013-08-06 05:59:15	18.63	21.11		5.61579	-18.9908	-21.5189
2013-08-06 06:09:15	18.69	21.18		5.62273	-19.052	-21.5902	2013-08-06 06:09:15
2013-08-06 06:19:15	18.71	21.2		5.62967	-19.0724	-21.6106
2013-08-06 06:29:15	18.72	21.2		5.63662	-19.0826	-21.6106
2013-08-06 06:39:15	18.73	21.2		5.64356	-19.0928	-21.6106
2013-08-06 06:49:15	18.76	21.22		5.65051	-19.1233	-21.631
2013-08-06 06:59:15	18.77	21.24		5.65745	-19.1335	-21.6514
2013-08-06 07:09:15	18.77	21.24		5.6644	-19.1335	-21.6514	2013-08-06 07:09:15
2013-08-06 07:19:15	18.77	21.24		5.67134	-19.1335	-21.6514
2013-08-06 07:29:15	18.05	20.53		5.67829	-18.3996	-20.9276
2013-08-06 07:39:15	18.18	20.65		5.68523	-18.5321	-21.0499
2013-08-06 07:49:15	18.29	20.73		5.69217	-18.6442	-21.1315
2013-08-06 07:59:15	18.37	20.83		5.69912	-18.7258	-21.2334
2013-08-06 08:09:15	18.48	20.94		5.70606	-18.8379	-21.3456	2013-08-06 08:09:15
2013-08-06 08:19:15	18.55	21		5.71301	-18.9093	-21.4067
2013-08-06 08:29:15	18.6	21.05		5.71995	-18.9602	-21.4577
2013-08-06 08:39:15	18.67	21.12		5.7269	-19.0316	-21.5291
2013-08-06 08:49:15	18.75	21.18		5.73384	-19.1131	-21.5902
2013-08-06 08:59:15	18.78	21.23		5.74079	-19.1437	-21.6412
2013-08-06 09:09:15	18.76	21.21		5.74773	-19.1233	-21.6208	2013-08-06 09:09:15
2013-08-06 09:19:15	18.78	21.22		5.75467	-19.1437	-21.631
2013-08-06 09:29:15	18.79	21.23		5.76162	-19.1539	-21.6412
2013-08-06 09:39:15	18.83	21.26		5.76856	-19.1947	-21.6718
2013-08-06 09:49:15	18.83	21.27		5.77551	-19.1947	-21.682
2013-08-06 09:59:15	18.85	21.29		5.78245	-19.2151	-21.7023
2013-08-06 10:09:15	18.85	21.29		5.7894	-19.2151	-21.7023	2013-08-06 10:09:15
2013-08-06 10:19:15	18.88	21.32		5.79634	-19.2457	-21.7329
2013-08-06 10:29:15	18.89	21.32		5.80329	-19.2559	-21.7329
2013-08-06 10:39:15	18.88	21.33		5.81023	-19.2457	-21.7431
2013-08-06 10:49:15	18.9	21.33		5.81717	-19.2661	-21.7431
2013-08-06 10:59:15	18.94	21.37		5.82412	-19.3068	-21.7839
2013-08-06 11:09:15	18.95	21.38		5.83106	-19.317	-21.7941	2013-08-06 11:09:15
2013-08-06 11:19:15	18.96	21.39		5.83801	-19.3272	-21.8043
2013-08-06 11:29:15	18.96	21.39		5.84495	-19.3272	-21.8043
2013-08-06 11:39:15	18.99	21.41		5.8519	-19.3578	-21.8247
2013-08-06 11:49:15	18.98	21.4		5.85884	-19.3476	-21.8145
2013-08-06 11:59:15	19.02	21.44		5.86579	-19.3884	-21.8552
2013-08-06 12:09:15	19.04	21.45		5.87273	-19.4088	-21.8654	2013-08-06 12:09:15
2013-08-06 12:19:15	19.07	21.48		5.87967	-19.4393	-21.896
2013-08-06 12:29:15	19.07	21.5		5.88662	-19.4393	-21.9164
2013-08-06 12:39:15	19.1	21.51		5.89356	-19.4699	-21.9266
2013-08-06 12:59:15	18.79	21.22		5.90745	-19.1539	-21.631
2013-08-06 13:09:15	18.94	21.36		5.9144	-19.3068	-21.7737
2013-08-06 13:19:15	19.06	21.47		5.92134	-19.4292	-21.8858	2013-08-06 13:19:15
2013-08-06 13:29:15	19.15	21.55		5.92829	-19.5209	-21.9674
2013-08-06 13:39:15	19.16	21.57		5.93523	-19.5311	-21.9878
2013-08-06 13:49:15	19.21	21.6		5.94217	-19.5821	-22.0183
2013-08-06 13:59:15	19.22	21.63		5.94912	-19.5923	-22.0489
2013-08-06 14:09:15	19.24	21.65		5.95606	-19.6126	-22.0693
2013-08-06 14:19:15	19.28	21.68		5.96301	-19.6534	-22.0999	2013-08-06 14:19:15
2013-08-06 14:29:15	19.32	21.71		5.96995	-19.6942	-22.1305
2013-08-06 14:39:15	19.33	21.73		5.9769	-19.7044	-22.1509
2013-08-06 14:49:15	19.36	21.75		5.98384	-19.735	-22.1713
2013-08-06 14:59:15	19.38	21.76		5.99079	-19.7554	-22.1814
2013-08-06 15:09:15	19.39	21.79		5.99773	-19.7655	-22.212
2013-08-06 15:19:15	19.4	21.81		6.00467	-19.7757	-22.2324	2013-08-06 15:19:15
2013-08-06 15:39:15	19.49	21.88		6.01856	-19.8675	-22.3038
2013-08-06 15:49:15	19.51	21.89		6.02551	-19.8879	-22.314
2013-08-06 15:59:15	19.52	21.92		6.03245	-19.8981	-22.3445
2013-08-06 16:09:15	19.55	21.94		6.0394	-19.9286	-22.3649
2013-08-06 16:19:15	19.59	21.95		6.04634	-19.9694	-22.3751
2013-08-06 16:29:15	19.61	21.99		6.05329	-19.9898	-22.4159	2013-08-06 16:29:15
2013-08-06 16:39:15	19.62	22.01		6.06023	-20	-22.4363
2013-08-06 16:49:15	19.65	22.04		6.06717	-20.0306	-22.4669
2013-08-06 16:59:15	19.67	22.06		6.07412	-20.051	-22.4873
2013-08-06 17:09:15	19.69	22.08		6.08106	-20.0714	-22.5076
2013-08-06 17:19:15	19.72	22.1		6.08801	-20.1019	-22.528
2013-08-06 17:29:15	19.75	22.13		6.09495	-20.1325	-22.5586	2013-08-06 17:29:15
2013-08-06 17:39:15	19.76	22.15		6.1019	-20.1427	-22.579
2013-08-06 17:49:15	19.8	22.19		6.10884	-20.1835	-22.6198
2013-08-06 17:59:15	19.82	22.21		6.11579	-20.2039	-22.6402
2013-08-06 18:09:15	19.84	22.22		6.12273	-20.2243	-22.6504
2013-08-06 18:19:15	19.17	21.53		6.12967	-19.5413	-21.947
2013-08-06 18:29:15	19.36	21.73		6.13662	-19.735	-22.1509	2013-08-06 18:29:15
2013-08-06 18:39:15	19.52	21.9		6.14356	-19.8981	-22.3242
2013-08-06 18:49:15	19.72	22.08		6.15051	-20.1019	-22.5076
2013-08-06 18:59:15	19.8	22.17		6.15745	-20.1835	-22.5994
2013-08-06 19:09:15	19.88	22.24		6.1644	-20.265	-22.6707
2013-08-06 19:19:15	19.9	22.26		6.17134	-20.2854	-22.6911
2013-08-06 19:29:15	19.92	22.29		6.17829	-20.3058	-22.7217	2013-08-06 19:29:15
2013-08-06 19:39:15	19.93	22.29		6.18523	-20.316	-22.7217
2013-08-06 19:49:15	19.94	22.3		6.19217	-20.3262	-22.7319
2013-08-06 19:59:15	19.95	22.31		6.19912	-20.3364	-22.7421
2013-08-06 20:09:15	19.99	22.35		6.20606	-20.3772	-22.7829
2013-08-06 20:19:15	20.01	22.37		6.21301	-20.3976	-22.8033
2013-08-06 20:29:15	20.03	22.4		6.21995	-20.4179	-22.8338	2013-08-06 20:29:15
2013-08-06 20:39:15	20.05	22.4		6.2269	-20.4383	-22.8338
2013-08-06 20:49:15	20.07	22.43		6.23384	-20.4587	-22.8644
2013-08-06 20:59:15	20.1	22.47		6.24079	-20.4893	-22.9052
2013-08-06 21:09:15	20.11	22.46		6.24773	-20.4995	-22.895
2013-08-06 21:19:15	20.12	22.48		6.25467	-20.5097	-22.9154
2013-08-06 21:29:15	20.14	22.5		6.26162	-20.5301	-22.9358	2013-08-06 21:29:15
2013-08-06 21:39:15	20.15	22.51		6.26856	-20.5403	-22.946
2013-08-06 21:49:15	20.17	22.53		6.27551	-20.5607	-22.9664
2013-08-06 21:59:15	20.18	22.54		6.28245	-20.5708	-22.9766
2013-08-06 22:09:15	20.19	22.55		6.2894	-20.581	-22.9867
2013-08-06 22:19:15	20.21	22.57		6.29634	-20.6014	-23.0071
2013-08-06 22:29:15	20.22	22.58		6.30329	-20.6116	-23.0173	2013-08-06 22:29:15
2013-08-06 22:39:15	20.23	22.59		6.31023	-20.6218	-23.0275
2013-08-06 22:49:15	20.27	22.62		6.31717	-20.6626	-23.0581
2013-08-06 22:59:15	20.23	22.59		6.32412	-20.6218	-23.0275
2013-08-06 23:09:15	20.24	22.6		6.33106	-20.632	-23.0377
2013-08-06 23:19:15	20.25	22.6		6.33801	-20.6422	-23.0377
2013-08-06 23:29:15	20.26	22.63		6.34495	-20.6524	-23.0683	2013-08-06 23:29:15
2013-08-06 23:39:15	20.27	22.62		6.3519	-20.6626	-23.0581
2013-08-06 23:49:15	20.28	22.63		6.35884	-20.6728	-23.0683
2013-08-06 23:59:15	20.28	22.64		6.36579	-20.6728	-23.0785
2013-08-07 00:09:15	20.3	22.65		6.37273	-20.6932	-23.0887
2013-08-07 00:19:15	20.08	22.43		6.37967	-20.4689	-22.8644
2013-08-07 00:29:15	20.2	22.56		6.38662	-20.5912	-22.9969	2013-08-07 00:29:15
2013-08-07 00:39:15	20.27	22.62		6.39356	-20.6626	-23.0581
2013-08-07 00:49:15	20.31	22.66		6.40051	-20.7034	-23.0989
2013-08-07 00:59:15	20.32	22.68		6.40745	-20.7136	-23.1193
2013-08-07 01:09:15	20.35	22.69		6.4144	-20.7441	-23.1295
2013-08-07 01:19:15	20.36	22.69		6.42134	-20.7543	-23.1295
2013-08-07 01:29:15	20.36	22.72		6.42829	-20.7543	-23.16	2013-08-07 01:29:15
2013-08-07 01:39:15	20.38	22.72		6.43523	-20.7747	-23.16
2013-08-07 01:49:15	20.39	22.74		6.44217	-20.7849	-23.1804
2013-08-07 01:59:15	20.4	22.74		6.44912	-20.7951	-23.1804
2013-08-07 02:09:15	20.42	22.77		6.45606	-20.8155	-23.211
2013-08-07 02:19:15	20.44	22.78		6.46301	-20.8359	-23.2212
2013-08-07 02:29:15	20.44	22.78		6.46995	-20.8359	-23.2212	2013-08-07 02:29:15
2013-08-07 02:39:15	20.46	22.81		6.4769	-20.8563	-23.2518
2013-08-07 02:49:15	20.47	22.82		6.48384	-20.8665	-23.262
2013-08-07 02:59:15	20.49	22.83		6.49079	-20.8869	-23.2722
2013-08-07 03:09:15	20.5	22.85		6.49773	-20.897	-23.2926
2013-08-07 03:19:15	20.52	22.87		6.50467	-20.9174	-23.3129
2013-08-07 03:29:15	20.53	22.86		6.51162	-20.9276	-23.3028	2013-08-07 03:29:15
2013-08-07 03:39:15	20.53	22.87		6.51856	-20.9276	-23.3129
2013-08-07 03:49:15	20.54	22.89		6.52551	-20.9378	-23.3333
2013-08-07 03:59:15	20.55	22.89		6.53245	-20.948	-23.3333
2013-08-07 04:09:15	20.56	22.91		6.5394	-20.9582	-23.3537
2013-08-07 04:19:15	20.57	22.91		6.54634	-20.9684	-23.3537
2013-08-07 04:29:15	20.58	22.92		6.55329	-20.9786	-23.3639	2013-08-07 04:29:15
2013-08-07 04:39:15	20.6	22.94		6.56023	-20.999	-23.3843
2013-08-07 04:49:15	20.6	22.95		6.56717	-20.999	-23.3945
2013-08-07 04:59:15	20.63	22.97		6.57412	-21.0296	-23.4149
2013-08-07 05:09:15	20.63	22.97		6.58106	-21.0296	-23.4149
2013-08-07 05:19:15	20.65	23		6.58801	-21.0499	-23.4455
2013-08-07 05:29:15	20.67	23.01		6.59495	-21.0703	-23.4557	2013-08-07 05:29:15
2013-08-07 05:39:15	20.66	23.01		6.6019	-21.0601	-23.4557
2013-08-07 05:49:15	20.7	23.04		6.60884	-21.1009	-23.4862
2013-08-07 05:59:15	20.69	23.03		6.61579	-21.0907	-23.476
2013-08-07 06:09:15	20.69	23.03		6.62273	-21.0907	-23.476
2013-08-07 06:19:15	20.71	23.05		6.62967	-21.1111	-23.4964
2013-08-07 06:29:15	20.73	23.07		6.63662	-21.1315	-23.5168	2013-08-07 06:29:15
2013-08-07 06:39:15	20.75	23.09		6.64356	-21.1519	-23.5372
2013-08-07 06:49:15	20.76	23.1		6.65051	-21.1621	-23.5474
2013-08-07 06:59:15	20.77	23.1		6.65745	-21.1723	-23.5474
2013-08-07 07:09:15	20.78	23.12		6.6644	-21.1825	-23.5678
2013-08-07 07:19:15	20.79	23.13		6.67134	-21.1927	-23.578
2013-08-07 07:29:15	20.81	23.15		6.67829	-21.213	-23.5984	2013-08-07 07:29:15
2013-08-07 07:39:15	20.81	23.15		6.68523	-21.213	-23.5984
2013-08-07 07:49:15	20.84	23.17		6.69217	-21.2436	-23.6188
2013-08-07 07:59:15	20.81	23.14		6.69912	-21.213	-23.5882
2013-08-07 08:09:15	20.85	23.18		6.70606	-21.2538	-23.629
2013-08-07 08:19:15	20.49	22.83		6.71301	-20.8869	-23.2722
2013-08-07 08:29:15	20.59	22.93		6.71995	-20.9888	-23.3741	2013-08-07 08:29:15
2013-08-07 08:39:15	20.72	23.06		6.7269	-21.1213	-23.5066
2013-08-07 08:49:15	20.81	23.13		6.73384	-21.213	-23.578
2013-08-07 08:59:15	20.88	23.21		6.74079	-21.2844	-23.6595
2013-08-07 09:09:15	20.89	23.22		6.74773	-21.2946	-23.6697
2013-08-07 09:19:15	20.91	23.24		6.75467	-21.315	-23.6901
2013-08-07 09:29:15	20.95	23.27		6.76162	-21.3558	-23.7207	2013-08-07 09:29:15
2013-08-07 09:39:15	20.94	23.28		6.76856	-21.3456	-23.7309
2013-08-07 09:49:15	20.98	23.32		6.77551	-21.3863	-23.7717
2013-08-07 09:59:15	21	23.32		6.78245	-21.4067	-23.7717
2013-08-07 10:09:15	21	23.33		6.7894	-21.4067	-23.7819
2013-08-07 10:19:15	21	23.33		6.79634	-21.4067	-23.7819
2013-08-07 10:29:15	21.02	23.35		6.80329	-21.4271	-23.8022	2013-08-07 10:29:15
2013-08-07 10:39:15	21.05	23.38		6.81023	-21.4577	-23.8328
2013-08-07 10:49:15	21.05	23.38		6.81717	-21.4577	-23.8328
2013-08-07 10:59:15	21.08	23.41		6.82412	-21.4883	-23.8634
2013-08-07 11:09:15	21.09	23.42		6.83106	-21.4985	-23.8736
2013-08-07 11:19:15	21.11	23.42		6.83801	-21.5189	-23.8736
2013-08-07 11:39:15	21.13	23.45		6.8519	-21.5392	-23.9042	2013-08-07 11:39:15
2013-08-07 11:49:15	21.15	23.47		6.85884	-21.5596	-23.9246
2013-08-07 11:59:15	21.16	23.48		6.86579	-21.5698	-23.9348
2013-08-07 12:09:15	21.17	23.5		6.87273	-21.58	-23.9551
2013-08-07 12:19:15	21.18	23.52		6.87967	-21.5902	-23.9755
2013-08-07 12:29:15	21.2	23.54		6.88662	-21.6106	-23.9959
2013-08-07 12:39:15	21.2	23.54		6.89356	-21.6106	-23.9959	2013-08-07 12:39:15
2013-08-07 12:49:15	21.22	23.54		6.90051	-21.631	-23.9959
2013-08-07 12:59:15	21.24	23.57		6.90745	-21.6514	-24.0265
2013-08-07 13:09:15	21.24	23.6		6.9144	-21.6514	-24.0571
2013-08-07 13:19:15	20.57	22.9		6.92134	-20.9684	-23.3435
2013-08-07 13:29:15	20.7	23.03		6.92829	-21.1009	-23.476
2013-08-07 13:39:15	20.84	23.16		6.93523	-21.2436	-23.6086	2013-08-07 13:39:15
2013-08-07 13:49:15	20.92	23.26		6.94217	-21.3252	-23.7105
2013-08-07 13:59:15	21.05	23.37		6.94912	-21.4577	-23.8226
2013-08-07 14:09:15	21.11	23.43		6.95606	-21.5189	-23.8838
2013-08-07 14:19:15	21.2	23.51		6.96301	-21.6106	-23.9653
2013-08-07 14:29:15	21.24	23.56		6.96995	-21.6514	-24.0163
2013-08-07 14:39:15	21.29	23.6		6.9769	-21.7023	-24.0571	2013-08-07 14:39:15
2013-08-07 14:49:15	21.29	23.61		6.98384	-21.7023	-24.0673
2013-08-07 14:59:15	21.31	23.64		6.99079	-21.7227	-24.0979
2013-08-07 15:09:15	21.32	23.64		6.99773	-21.7329	-24.0979
2013-08-07 15:19:15	21.35	23.67		7.00467	-21.7635	-24.1284
2013-08-07 15:29:15	21.35	23.67		7.01162	-21.7635	-24.1284
2013-08-07 15:39:15	21.39	23.7		7.01856	-21.8043	-24.159	2013-08-07 15:39:15
2013-08-07 15:49:15	21.41	23.72		7.02551	-21.8247	-24.1794
2013-08-07 15:59:15	21.4	23.73		7.03245	-21.8145	-24.1896
2013-08-07 16:09:15	21.42	23.74		7.0394	-21.8349	-24.1998
2013-08-07 16:19:15	21.44	23.77		7.04634	-21.8552	-24.2304
2013-08-07 16:29:15	21.46	23.77		7.05329	-21.8756	-24.2304
2013-08-07 16:39:15	21.45	23.76		7.06023	-21.8654	-24.2202	2013-08-07 16:39:15
2013-08-07 16:49:15	21.45	23.77		7.06717	-21.8654	-24.2304
2013-08-07 16:59:15	21.47	23.78		7.07412	-21.8858	-24.2406
2013-08-07 17:09:15	21.48	23.79		7.08106	-21.896	-24.2508
2013-08-07 17:19:15	21.49	23.8		7.08801	-21.9062	-24.261
2013-08-07 17:29:15	21.52	23.84		7.09495	-21.9368	-24.3017
2013-08-07 17:39:15	21.52	23.83		7.1019	-21.9368	-24.2915	2013-08-07 17:39:15
2013-08-07 17:49:15	21.55	23.86		7.10884	-21.9674	-24.3221
2013-08-07 17:59:15	21.55	23.87		7.11579	-21.9674	-24.3323
2013-08-07 18:09:15	21.56	23.88		7.12273	-21.9776	-24.3425
2013-08-07 18:19:15	21.58	23.9		7.12967	-21.998	-24.3629
2013-08-07 18:29:15	21.58	23.91		7.13662	-21.998	-24.3731
2013-08-07 18:39:15	21.61	23.92		7.14356	-22.0285	-24.3833	2013-08-07 18:39:15
2013-08-07 18:49:15	21.58	23.9		7.15051	-21.998	-24.3629
2013-08-07 18:59:15	21.61	23.93		7.15745	-22.0285	-24.3935
2013-08-07 19:09:15	21.63	23.95		7.1644	-22.0489	-24.4139
2013-08-07 19:19:15	21.65	23.96		7.17134	-22.0693	-24.4241
2013-08-07 19:39:15	21.24	23.59		7.18523	-21.6514	-24.0469
2013-08-07 19:49:15	21.4	23.72		7.19217	-21.8145	-24.1794	2013-08-07 19:49:15
2013-08-07 19:59:15	21.5	23.81		7.19912	-21.9164	-24.2712
2013-08-07 20:09:15	21.57	23.86		7.20606	-21.9878	-24.3221
2013-08-07 20:19:15	21.66	23.96		7.21301	-22.0795	-24.4241
2013-08-07 20:29:15	21.65	23.97		7.21995	-22.0693	-24.4343
2013-08-07 20:39:15	21.68	23.99		7.2269	-22.0999	-24.4546
2013-08-07 20:49:15	21.69	24		7.23384	-22.1101	-24.4648	2013-08-07 20:49:15
2013-08-07 20:59:15	21.69	24		7.24079	-22.1101	-24.4648
2013-08-07 21:09:15	21.72	24.02		7.24773	-22.1407	-24.4852
2013-08-07 21:19:15	21.71	24.03		7.25467	-22.1305	-24.4954
2013-08-07 21:29:15	21.73	24.04		7.26162	-22.1509	-24.5056
2013-08-07 21:39:15	21.75	24.06		7.26856	-22.1713	-24.526
2013-08-07 21:49:15	21.75	24.07		7.27551	-22.1713	-24.5362	2013-08-07 21:49:15
2013-08-07 21:59:15	21.78	24.09		7.28245	-22.2018	-24.5566
2013-08-07 22:09:15	21.78	24.1		7.2894	-22.2018	-24.5668
2013-08-07 22:19:15	21.79	24.11		7.29634	-22.212	-24.577
2013-08-07 22:29:15	21.82	24.13		7.30329	-22.2426	-24.5973
2013-08-07 22:39:15	21.82	24.14		7.31023	-22.2426	-24.6075
2013-08-07 22:49:15	21.83	24.15		7.31717	-22.2528	-24.6177	2013-08-07 22:49:15
2013-08-07 22:59:15	21.86	24.16		7.32412	-22.2834	-24.6279
2013-08-07 23:09:15	21.86	24.18		7.33106	-22.2834	-24.6483
2013-08-07 23:19:15	21.89	24.21		7.33801	-22.314	-24.6789
2013-08-07 23:29:15	21.91	24.21		7.34495	-22.3344	-24.6789
2013-08-07 23:39:15	21.9	24.22		7.3519	-22.3242	-24.6891
2013-08-07 23:49:15	21.91	24.23		7.35884	-22.3344	-24.6993	2013-08-07 23:49:15
2013-08-07 23:59:15	21.93	24.24		7.36579	-22.3547	-24.7095
2013-08-08 00:09:15	21.92	24.24		7.37273	-22.3445	-24.7095
2013-08-08 00:19:15	21.95	24.26		7.37967	-22.3751	-24.7299
2013-08-08 00:29:15	21.96	24.26		7.38662	-22.3853	-24.7299
2013-08-08 00:39:15	21.96	24.29		7.39356	-22.3853	-24.7604
2013-08-08 00:49:15	21.99	24.31		7.40051	-22.4159	-24.7808	2013-08-08 00:49:15
2013-08-08 00:59:15	22	24.31		7.40745	-22.4261	-24.7808
2013-08-08 01:09:15	22.01	24.33		7.4144	-22.4363	-24.8012
2013-08-08 01:19:15	22.01	24.33		7.42134	-22.4363	-24.8012
2013-08-08 01:29:15	22.03	24.35		7.42829	-22.4567	-24.8216
2013-08-08 01:39:15	22.05	24.37		7.43523	-22.4771	-24.842
2013-08-08 01:49:15	22.07	24.38		7.44217	-22.4975	-24.8522	2013-08-08 01:49:15
2013-08-08 01:59:15	22.07	24.39		7.44912	-22.4975	-24.8624
2013-08-08 02:09:15	22.09	24.39		7.45606	-22.5178	-24.8624
2013-08-08 02:19:15	22.09	24.41		7.46301	-22.5178	-24.8828
2013-08-08 02:29:15	22.1	24.42		7.46995	-22.528	-24.893
2013-08-08 02:39:15	22.11	24.42		7.4769	-22.5382	-24.893
2013-08-08 02:49:15	22.12	24.44		7.48384	-22.5484	-24.9134	2013-08-08 02:49:15
2013-08-08 02:59:15	22.11	24.44		7.49079	-22.5382	-24.9134
2013-08-08 03:09:15	22.13	24.45		7.49773	-22.5586	-24.9235
2013-08-08 03:19:15	22.14	24.46		7.50467	-22.5688	-24.9337
2013-08-08 03:29:15	22.14	24.46		7.51162	-22.5688	-24.9337
2013-08-08 03:39:15	22.16	24.49		7.51856	-22.5892	-24.9643
2013-08-08 03:49:15	22.18	24.49		7.52551	-22.6096	-24.9643	2013-08-08 03:49:15
2013-08-08 03:59:15	22.17	24.49		7.53245	-22.5994	-24.9643
2013-08-08 04:09:15	22.19	24.51		7.5394	-22.6198	-24.9847
2013-08-08 04:19:15	22.2	24.51		7.54634	-22.63	-24.9847
2013-08-08 04:29:15	22.19	24.52		7.55329	-22.6198	-24.9949
2013-08-08 04:39:15	22.22	24.55		7.56023	-22.6504	-25.0255
2013-08-08 04:49:15	22.25	24.56		7.56717	-22.6809	-25.0357	2013-08-08 04:49:15
2013-08-08 04:59:15	22.24	24.56		7.57412	-22.6707	-25.0357
2013-08-08 05:09:15	22.25	24.55		7.58106	-22.6809	-25.0255
2013-08-08 05:19:15	22.26	24.58		7.58801	-22.6911	-25.0561
2013-08-08 05:29:15	22.27	24.6		7.59495	-22.7013	-25.0765
2013-08-08 05:39:15	22.28	24.61		7.6019	-22.7115	-25.0866
2013-08-08 05:49:15	22.29	24.61		7.60884	-22.7217	-25.0866	2013-08-08 05:49:15
2013-08-08 05:59:15	22.27	24.59		7.61579	-22.7013	-25.0663
2013-08-08 06:09:15	22.28	24.6		7.62273	-22.7115	-25.0765
2013-08-08 06:19:15	22.31	24.62		7.62967	-22.7421	-25.0968
2013-08-08 06:29:15	22.31	24.62		7.63662	-22.7421	-25.0968
2013-08-08 06:39:15	22.31	24.63		7.64356	-22.7421	-25.107
2013-08-08 06:49:15	22.32	24.63		7.65051	-22.7523	-25.107	2013-08-08 06:49:15
2013-08-08 06:59:15	22.34	24.66		7.65745	-22.7727	-25.1376
2013-08-08 07:09:15	22.34	24.66		7.6644	-22.7727	-25.1376
2013-08-08 07:19:15	22.38	24.67		7.67134	-22.8135	-25.1478
2013-08-08 07:29:15	22.38	24.69		7.67829	-22.8135	-25.1682
2013-08-08 07:39:15	22.38	24.69		7.68523	-22.8135	-25.1682
2013-08-08 07:49:15	22.35	24.66		7.69217	-22.7829	-25.1376	2013-08-08 07:49:15
2013-08-08 07:59:15	22.39	24.71		7.69912	-22.8236	-25.1886
2013-08-08 08:09:15	22.4	24.72		7.70606	-22.8338	-25.1988
2013-08-08 08:19:15	22.41	24.73		7.71301	-22.844	-25.209
2013-08-08 08:29:15	22.23	24.54		7.71995	-22.6606	-25.0153
2013-08-08 08:39:15	22.37	24.68		7.7269	-22.8033	-25.158
2013-08-08 08:49:15	22.45	24.74		7.73384	-22.8848	-25.2192	2013-08-08 08:49:15
2013-08-08 08:59:15	22.44	24.74		7.74079	-22.8746	-25.2192
2013-08-08 09:09:15	22.47	24.77		7.74773	-22.9052	-25.2497
2013-08-08 09:19:15	22.47	24.78		7.75467	-22.9052	-25.2599
2013-08-08 09:29:15	22.5	24.8		7.76162	-22.9358	-25.2803
2013-08-08 09:39:15	22.51	24.82		7.76856	-22.946	-25.3007
2013-08-08 09:49:15	22.52	24.81		7.77551	-22.9562	-25.2905	2013-08-08 09:49:15
2013-08-08 09:59:15	22.54	24.86		7.78245	-22.9766	-25.3415
2013-08-08 10:09:15	22.56	24.87		7.7894	-22.9969	-25.3517
2013-08-08 10:19:15	22.58	24.89		7.79634	-23.0173	-25.3721
2013-08-08 10:29:15	22.58	24.9		7.80329	-23.0173	-25.3823
2013-08-08 10:39:15	22.6	24.91		7.81023	-23.0377	-25.3925
2013-08-08 10:49:15	22.62	24.93		7.81717	-23.0581	-25.4128	2013-08-08 10:49:15
2013-08-08 10:59:15	22.64	24.94		7.82412	-23.0785	-25.423
2013-08-08 11:09:15	22.64	24.95		7.83106	-23.0785	-25.4332
2013-08-08 11:19:15	22.65	24.96		7.83801	-23.0887	-25.4434
2013-08-08 11:29:15	22.67	25		7.84495	-23.1091	-25.4842
2013-08-08 11:39:15	22.67	24.99		7.8519	-23.1091	-25.474
2013-08-08 11:49:15	22.71	25.02		7.85884	-23.1498	-25.5046	2013-08-08 11:49:15
2013-08-08 11:59:15	22.71	25.02		7.86579	-23.1498	-25.5046
2013-08-08 12:09:15	22.73	25.04		7.87273	-23.1702	-25.525
2013-08-08 12:19:15	22.74	25.05		7.87967	-23.1804	-25.5352
2013-08-08 12:29:15	22.74	25.07		7.88662	-23.1804	-25.5556
2013-08-08 12:39:15	22.76	25.08		7.89356	-23.2008	-25.5657
2013-08-08 12:49:15	22.78	25.09		7.90051	-23.2212	-25.5759	2013-08-08 12:49:15
2013-08-08 12:59:15	22.8	25.11		7.90745	-23.2416	-25.5963
2013-08-08 13:09:15	22.8	25.11		7.9144	-23.2416	-25.5963
2013-08-08 13:19:15	22.84	25.15		7.92134	-23.2824	-25.6371
2013-08-08 13:29:15	22.83	25.15		7.92829	-23.2722	-25.6371
2013-08-08 13:39:15	22.83	25.15		7.93523	-23.2722	-25.6371
2013-08-08 13:49:15	22.86	25.17		7.94217	-23.3028	-25.6575	2013-08-08 13:49:15
2013-08-08 13:59:15	22.88	25.19		7.94912	-23.3231	-25.6779
2013-08-08 14:09:15	22.88	25.19		7.95606	-23.3231	-25.6779
2013-08-08 14:19:15	22.9	25.22		7.96301	-23.3435	-25.7085
2013-08-08 14:29:15	22.92	25.24		7.96995	-23.3639	-25.7288
2013-08-08 14:39:15	22.94	25.25		7.9769	-23.3843	-25.739
2013-08-08 14:49:15	22.96	25.26		7.98384	-23.4047	-25.7492	2013-08-08 14:49:15
2013-08-08 14:59:15	22.97	25.29		7.99079	-23.4149	-25.7798
2013-08-08 15:09:15	22.98	25.29		7.99773	-23.4251	-25.7798
2013-08-08 15:19:15	22.98	25.29		8.00467	-23.4251	-25.7798
2013-08-08 15:29:15	22.98	25.3		8.01162	-23.4251	-25.79
2013-08-08 15:39:15	23.01	25.32		8.01856	-23.4557	-25.8104
2013-08-08 15:49:15	23.01	25.33		8.02551	-23.4557	-25.8206	2013-08-08 15:49:15
2013-08-08 15:59:15	23.03	25.35		8.03245	-23.476	-25.841
2013-08-08 16:09:15	23.05	25.38		8.0394	-23.4964	-25.8716
2013-08-08 16:19:15	23.07	25.38		8.04634	-23.5168	-25.8716
2013-08-08 16:29:15	23.08	25.38		8.05329	-23.527	-25.8716
2013-08-08 16:39:15	23.1	25.4		8.06023	-23.5474	-25.8919
2013-08-08 16:49:15	23.08	25.41		8.06717	-23.527	-25.9021	2013-08-08 16:49:15
2013-08-08 16:59:15	23.11	25.43		8.07412	-23.5576	-25.9225
2013-08-08 17:09:15	23.12	25.44		8.08106	-23.5678	-25.9327
2013-08-08 17:19:15	23.13	25.44		8.08801	-23.578	-25.9327
2013-08-08 17:29:15	23.18	25.48		8.09495	-23.629	-25.9735
2013-08-08 17:39:15	23.17	25.47		8.1019	-23.6188	-25.9633
2013-08-08 17:49:15	23.18	25.48		8.10884	-23.629	-25.9735	2013-08-08 17:49:15
2013-08-08 17:59:15	23.18	25.49		8.11579	-23.629	-25.9837
2013-08-08 18:09:15	23.2	25.51		8.12273	-23.6493	-26.0041
2013-08-08 18:19:15	23.21	25.52		8.12967	-23.6595	-26.0143
2013-08-08 18:29:15	23.23	25.55		8.13662	-23.6799	-26.0449
2013-08-08 18:49:15	23.26	25.58		8.15051	-23.7105	-26.0754
2013-08-08 18:59:15	23.31	25.6		8.15745	-23.7615	-26.0958	2013-08-08 18:59:15
2013-08-08 19:09:15	23.32	25.62		8.1644	-23.7717	-26.1162
2013-08-08 19:19:15	23.34	25.64		8.17134	-23.792	-26.1366
2013-08-08 19:29:15	23.33	25.64		8.17829	-23.7819	-26.1366
2013-08-08 19:39:15	23.35	25.65		8.18523	-23.8022	-26.1468
2013-08-08 19:49:15	23.37	25.68		8.19217	-23.8226	-26.1774
2013-08-08 19:59:15	23.1	25.41		8.19912	-23.5474	-25.9021	2013-08-08 19:59:15
2013-08-08 20:09:15	23.21	25.52		8.20606	-23.6595	-26.0143
2013-08-08 20:19:15	23.31	25.62		8.21301	-23.7615	-26.1162
2013-08-08 20:29:15	23.38	25.69		8.21995	-23.8328	-26.1876
2013-08-08 20:39:15	23.4	25.71		8.2269	-23.8532	-26.208
2013-08-08 20:49:15	23.41	25.72		8.23384	-23.8634	-26.2181
2013-08-08 20:59:15	23.42	25.74		8.24079	-23.8736	-26.2385	2013-08-08 20:59:15
2013-08-08 21:09:15	23.45	25.77		8.24773	-23.9042	-26.2691
2013-08-08 21:19:15	23.46	25.77		8.25467	-23.9144	-26.2691
2013-08-08 21:29:15	23.47	25.79		8.26162	-23.9246	-26.2895
2013-08-08 21:39:15	23.49	25.81		8.26856	-23.945	-26.3099
2013-08-08 21:49:15	23.54	25.84		8.27551	-23.9959	-26.3405
2013-08-08 21:59:15	23.54	25.85		8.28245	-23.9959	-26.3507	2013-08-08 21:59:15
2013-08-08 22:09:15	23.56	25.87		8.2894	-24.0163	-26.371
2013-08-08 22:19:15	23.56	25.88		8.29634	-24.0163	-26.3812
2013-08-08 22:29:15	23.58	25.9		8.30329	-24.0367	-26.4016
2013-08-08 22:39:15	23.62	25.93		8.31023	-24.0775	-26.4322
2013-08-08 22:49:15	23.63	25.94		8.31717	-24.0877	-26.4424
2013-08-08 22:59:15	23.63	25.94		8.32412	-24.0877	-26.4424	2013-08-08 22:59:15
2013-08-08 23:09:15	23.67	25.97		8.33106	-24.1284	-26.473
2013-08-08 23:19:15	23.66	25.98		8.33801	-24.1182	-26.4832
2013-08-08 23:29:15	23.67	25.99		8.34495	-24.1284	-26.4934
2013-08-08 23:39:15	23.71	26.01		8.3519	-24.1692	-26.5138
2013-08-08 23:49:15	23.72	26.03		8.35884	-24.1794	-26.5341
2013-08-08 23:59:15	23.73	26.04		8.36579	-24.1896	-26.5443	2013-08-08 23:59:15
2013-08-09 00:09:15	23.75	26.05		8.37273	-24.21	-26.5545
2013-08-09 00:19:15	23.75	26.06		8.37967	-24.21	-26.5647
2013-08-09 00:29:15	23.76	26.07		8.38662	-24.2202	-26.5749
2013-08-09 00:39:15	23.77	26.07		8.39356	-24.2304	-26.5749
2013-08-09 00:49:15	23.81	26.11		8.40051	-24.2712	-26.6157
2013-08-09 00:59:15	23.82	26.12		8.40745	-24.2813	-26.6259	2013-08-09 00:59:15
2013-08-09 01:09:15	23.83	26.13		8.4144	-24.2915	-26.6361
2013-08-09 01:19:15	23.84	26.15		8.42134	-24.3017	-26.6565
2013-08-09 01:29:15	23.85	26.17		8.42829	-24.3119	-26.6769
2013-08-09 01:39:15	23.87	26.19		8.43523	-24.3323	-26.6972
2013-08-09 01:49:15	23.88	26.19		8.44217	-24.3425	-26.6972
2013-08-09 01:59:15	23.9	26.21		8.44912	-24.3629	-26.7176	2013-08-09 01:59:15
2013-08-09 02:09:15	23.87	26.18		8.45606	-24.3323	-26.6871
2013-08-09 02:19:15	23.89	26.2		8.46301	-24.3527	-26.7074
2013-08-09 02:29:15	23.9	26.21		8.46995	-24.3629	-26.7176
2013-08-09 02:39:15	23.92	26.23		8.4769	-24.3833	-26.738
2013-08-09 02:49:15	23.95	26.26		8.48384	-24.4139	-26.7686
2013-08-09 02:59:15	23.97	26.27		8.49079	-24.4343	-26.7788	2013-08-09 02:59:15
2013-08-09 03:09:15	23.98	26.28		8.49773	-24.4444	-26.789
2013-08-09 03:19:15	24	26.3		8.50467	-24.4648	-26.8094
2013-08-09 03:29:15	24.01	26.32		8.51162	-24.475	-26.8298
2013-08-09 03:39:15	24.02	26.33		8.51856	-24.4852	-26.84
2013-08-09 03:49:15	24.03	26.34		8.52551	-24.4954	-26.8502
2013-08-09 03:59:15	24.06	26.37		8.53245	-24.526	-26.8807	2013-08-09 03:59:15
2013-08-09 04:09:15	24.09	26.39		8.5394	-24.5566	-26.9011
2013-08-09 04:19:15	24.09	26.4		8.54634	-24.5566	-26.9113
2013-08-09 04:29:15	24.11	26.42		8.55329	-24.577	-26.9317
2013-08-09 04:39:15	24.12	26.43		8.56023	-24.5872	-26.9419
2013-08-09 04:49:15	24.16	26.46		8.56717	-24.6279	-26.9725
2013-08-09 04:59:15	24.16	26.47		8.57412	-24.6279	-26.9827	2013-08-09 04:59:15
2013-08-09 05:09:15	24.19	26.49		8.58106	-24.6585	-27.0031
2013-08-09 05:19:15	24.21	26.51		8.58801	-24.6789	-27.0234
2013-08-09 05:29:15	24.23	26.53		8.59495	-24.6993	-27.0438
2013-08-09 05:39:15	24.25	26.55		8.6019	-24.7197	-27.0642
2013-08-09 05:49:15	24.27	26.57		8.60884	-24.7401	-27.0846
2013-08-09 05:59:15	24.3	26.6		8.61579	-24.7706	-27.1152	2013-08-09 05:59:15
2013-08-09 06:09:15	24.31	26.62		8.62273	-24.7808	-27.1356
2013-08-09 06:19:15	24.34	26.64		8.62967	-24.8114	-27.156
2013-08-09 06:29:15	24.36	26.66		8.63662	-24.8318	-27.1764
2013-08-09 06:39:15	24.36	26.66		8.64356	-24.8318	-27.1764
2013-08-09 06:49:15	24.4	26.7		8.65051	-24.8726	-27.2171
2013-08-09 06:59:15	24.41	26.71		8.65745	-24.8828	-27.2273	2013-08-09 06:59:15
2013-08-09 07:09:15	24.43	26.73		8.6644	-24.9032	-27.2477
2013-08-09 07:19:15	24.45	26.74		8.67134	-24.9235	-27.2579
2013-08-09 07:29:15	24.45	26.75		8.67829	-24.9235	-27.2681
2013-08-09 07:39:15	24.47	26.76		8.68523	-24.9439	-27.2783
2013-08-09 07:49:15	24.48	26.79		8.69217	-24.9541	-27.3089
2013-08-09 07:59:15	24.48	26.79		8.69912	-24.9541	-27.3089	2013-08-09 07:59:15
2013-08-09 08:09:15	24.51	26.81		8.70606	-24.9847	-27.3293
2013-08-09 08:19:15	24.56	26.83		8.71301	-25.0357	-27.3496
2013-08-09 08:29:15	24.55	26.85		8.71995	-25.0255	-27.37
2013-08-09 08:39:15	24.56	26.86		8.7269	-25.0357	-27.3802
2013-08-09 08:49:15	24.58	26.88		8.73384	-25.0561	-27.4006
2013-08-09 08:59:15	24.59	26.88		8.74079	-25.0663	-27.4006	2013-08-09 08:59:15
2013-08-09 09:09:15	24.62	26.92		8.74773	-25.0968	-27.4414
2013-08-09 09:19:15	24.64	26.93		8.75467	-25.1172	-27.4516
2013-08-09 09:39:15	24.47	26.79		8.76856	-24.9439	-27.3089
2013-08-09 09:49:15	24.66	26.96		8.77551	-25.1376	-27.4822
2013-08-09 09:59:15	24.7	27		8.78245	-25.1784	-27.5229
2013-08-09 10:09:15	24.73	27.02		8.7894	-25.209	-27.5433	2013-08-09 10:09:15
2013-08-09 10:19:15	24.75	27.05		8.79634	-25.2294	-27.5739
2013-08-09 10:29:15	24.76	27.05		8.80329	-25.2396	-27.5739
2013-08-09 10:39:15	24.8	27.1		8.81023	-25.2803	-27.6249
2013-08-09 10:49:15	24.81	27.1		8.81717	-25.2905	-27.6249
2013-08-09 10:59:15	24.83	27.14		8.82412	-25.3109	-27.6656
2013-08-09 11:09:15	24.85	27.14		8.83106	-25.3313	-27.6656	2013-08-09 11:09:15
2013-08-09 11:19:15	24.88	27.17		8.83801	-25.3619	-27.6962
2013-08-09 11:29:15	24.91	27.19		8.84495	-25.3925	-27.7166
2013-08-09 11:39:15	24.9	27.2		8.8519	-25.3823	-27.7268
2013-08-09 11:49:15	24.93	27.23		8.85884	-25.4128	-27.7574
2013-08-09 11:59:15	24.96	27.26		8.86579	-25.4434	-27.788
2013-08-09 12:09:15	24.99	27.29		8.87273	-25.474	-27.8186	2013-08-09 12:09:15
2013-08-09 12:19:15	25	27.3		8.87967	-25.4842	-27.8287
2013-08-09 12:29:15	25.03	27.32		8.88662	-25.5148	-27.8491
2013-08-09 12:39:15	25.04	27.33		8.89356	-25.525	-27.8593
2013-08-09 12:49:15	25.09	27.38		8.90051	-25.5759	-27.9103
2013-08-09 12:59:15	25.1	27.39		8.90745	-25.5861	-27.9205
2013-08-09 13:09:15	25.12	27.42		8.9144	-25.6065	-27.9511	2013-08-09 13:09:15
2013-08-09 13:19:15	24.93	27.19		8.92134	-25.4128	-27.7166
2013-08-09 13:29:15	25.01	27.3		8.92829	-25.4944	-27.8287
2013-08-09 13:39:15	25.13	27.43		8.93523	-25.6167	-27.9613
2013-08-09 13:49:15	25.14	27.45		8.94217	-25.6269	-27.9817
2013-08-09 13:59:15	25.2	27.5		8.94912	-25.6881	-28.0326
2013-08-09 14:09:15	25.22	27.54		8.95606	-25.7085	-28.0734	2013-08-09 14:09:15
2013-08-09 14:19:15	25.25	27.55		8.96301	-25.739	-28.0836
2013-08-09 14:29:15	25.26	27.59		8.96995	-25.7492	-28.1244
2013-08-09 14:39:15	25.33	27.62		8.9769	-25.8206	-28.1549
2013-08-09 14:49:15	25.33	27.63		8.98384	-25.8206	-28.1651
2013-08-09 14:59:15	25.36	27.66		8.99079	-25.8512	-28.1957
2013-08-09 15:09:15	25.4	27.7		8.99773	-25.8919	-28.2365	2013-08-09 15:09:15
2013-08-09 15:19:15	25.44	27.73		9.00467	-25.9327	-28.2671
2013-08-09 15:29:15	25.47	27.75		9.01162	-25.9633	-28.2875
2013-08-09 15:39:15	25.48	27.77		9.01856	-25.9735	-28.3078
2013-08-09 15:49:15	25.51	27.8		9.02551	-26.0041	-28.3384
2013-08-09 15:59:15	25.52	27.83		9.03245	-26.0143	-28.369
2013-08-09 16:09:15	25.56	27.85		9.0394	-26.055	-28.3894	2013-08-09 16:09:15
2013-08-09 16:19:15	25.59	27.88		9.04634	-26.0856	-28.42
2013-08-09 16:29:15	25.62	27.91		9.05329	-26.1162	-28.4506
2013-08-09 16:39:15	25.64	27.93		9.06023	-26.1366	-28.4709
2013-08-09 16:49:15	25.65	27.96		9.06717	-26.1468	-28.5015
2013-08-09 16:59:15	25.68	27.99		9.07412	-26.1774	-28.5321
2013-08-09 17:09:15	25.69	27.98		9.08106	-26.1876	-28.5219	2013-08-09 17:09:15
2013-08-09 17:19:15	25.74	28.03		9.08801	-26.2385	-28.5729
2013-08-09 17:29:15	25.77	28.07		9.09495	-26.2691	-28.6137
2013-08-09 17:39:15	25.8	28.1		9.1019	-26.2997	-28.6442
2013-08-09 17:49:15	25.83	28.12		9.10884	-26.3303	-28.6646
2013-08-09 17:59:15	25.86	28.15		9.11579	-26.3609	-28.6952
2013-08-09 18:09:15	25.87	28.18		9.12273	-26.371	-28.7258	2013-08-09 18:09:15
2013-08-09 18:19:15	25.91	28.2		9.12967	-26.4118	-28.7462
2013-08-09 18:29:15	25.94	28.22		9.13662	-26.4424	-28.7666
2013-08-09 18:39:15	25.54	27.85		9.14356	-26.0347	-28.3894
2013-08-09 18:49:15	25.75	28.04		9.15051	-26.2487	-28.5831
2013-08-09 18:59:15	25.91	28.21		9.15745	-26.4118	-28.7564
2013-08-09 19:09:15	25.99	28.28		9.1644	-26.4934	-28.8277	2013-08-09 19:09:15
2013-08-09 19:19:15	26.03	28.32		9.17134	-26.5341	-28.8685
2013-08-09 19:29:15	26.04	28.32		9.17829	-26.5443	-28.8685
2013-08-09 19:39:15	26.07	28.37		9.18523	-26.5749	-28.9195
2013-08-09 19:49:15	26.1	28.4		9.19217	-26.6055	-28.9501
2013-08-09 19:59:15	26.15	28.44		9.19912	-26.6565	-28.9908
2013-08-09 20:09:15	26.18	28.47		9.20606	-26.6871	-29.0214	2013-08-09 20:09:15
2013-08-09 20:19:15	26.18	28.48		9.21301	-26.6871	-29.0316
2013-08-09 20:29:15	26.22	28.51		9.21995	-26.7278	-29.0622
2013-08-09 20:39:15	26.24	28.53		9.2269	-26.7482	-29.0826
2013-08-09 20:49:15	26.26	28.58		9.23384	-26.7686	-29.1335
2013-08-09 20:59:15	26.29	28.59		9.24079	-26.7992	-29.1437
2013-08-09 21:09:15	26.33	28.63		9.24773	-26.84	-29.1845	2013-08-09 21:09:15
2013-08-09 21:19:15	26.36	28.64		9.25467	-26.8705	-29.1947
2013-08-09 21:29:15	26.36	28.65		9.26162	-26.8705	-29.2049
2013-08-09 21:39:15	26.38	28.68		9.26856	-26.8909	-29.2355
2013-08-09 21:49:15	26.38	28.68		9.27551	-26.8909	-29.2355
2013-08-09 21:59:15	26.4	28.7		9.28245	-26.9113	-29.2559
2013-08-09 22:09:15	26.42	28.73		9.2894	-26.9317	-29.2864	2013-08-09 22:09:15
2013-08-09 22:19:15	26.46	28.75		9.29634	-26.9725	-29.3068
2013-08-09 22:29:15	26.47	28.77		9.30329	-26.9827	-29.3272
2013-08-09 22:39:15	26.49	28.78		9.31023	-27.0031	-29.3374
2013-08-09 22:49:15	26.5	28.82		9.31717	-27.0133	-29.3782
2013-08-09 22:59:15	26.54	28.83		9.32412	-27.054	-29.3884
2013-08-09 23:09:15	26.56	28.85		9.33106	-27.0744	-29.4088	2013-08-09 23:09:15
2013-08-09 23:19:15	26.57	28.88		9.33801	-27.0846	-29.4393
2013-08-09 23:29:15	26.59	28.9		9.34495	-27.105	-29.4597
2013-08-09 23:39:15	26.61	28.91		9.3519	-27.1254	-29.4699
2013-08-09 23:49:15	26.62	28.91		9.35884	-27.1356	-29.4699
2013-08-09 23:59:15	26.66	28.94		9.36579	-27.1764	-29.5005
2013-08-10 00:09:15	26.68	28.98		9.37273	-27.1967	-29.5413	2013-08-10 00:09:15
2013-08-10 00:19:15	26.69	29		9.37967	-27.2069	-29.5617
2013-08-10 00:29:15	26.7	28.99		9.38662	-27.2171	-29.5515
2013-08-10 00:39:15	26.74	29.04		9.39356	-27.2579	-29.6024
2013-08-10 00:49:15	26.78	29.08		9.40051	-27.2987	-29.6432
2013-08-10 00:59:15	26.79	29.1		9.40745	-27.3089	-29.6636
2013-08-10 01:09:15	26.81	29.11		9.4144	-27.3293	-29.6738	2013-08-10 01:09:15
2013-08-10 01:19:15	26.83	29.12		9.42134	-27.3496	-29.684
2013-08-10 01:29:15	26.86	29.15		9.42829	-27.3802	-29.7146
2013-08-10 01:39:15	26.88	29.18		9.43523	-27.4006	-29.7452
2013-08-10 01:49:15	26.89	29.2		9.44217	-27.4108	-29.7655
2013-08-10 01:59:15	26.92	29.22		9.44912	-27.4414	-29.7859
2013-08-10 02:09:15	26.96	29.26		9.45606	-27.4822	-29.8267	2013-08-10 02:09:15
2013-08-10 02:19:15	26.97	29.27		9.46301	-27.4924	-29.8369
2013-08-10 02:29:15	27.01	29.3		9.46995	-27.5331	-29.8675
2013-08-10 02:39:15	27.02	29.31		9.4769	-27.5433	-29.8777
2013-08-10 02:49:15	27.06	29.34		9.48384	-27.5841	-29.9083
2013-08-10 02:59:15	27.07	29.37		9.49079	-27.5943	-29.9388
2013-08-10 03:09:15	27.08	29.38		9.49773	-27.6045	-29.949	2013-08-10 03:09:15
2013-08-10 03:19:15	27.11	29.41		9.50467	-27.6351	-29.9796
2013-08-10 03:29:15	27.13	29.43		9.51162	-27.6555	-30
2013-08-10 03:39:15	27.14	29.44		9.51856	-27.6656	-30.0102
2013-08-10 03:49:15	27.17	29.47		9.52551	-27.6962	-30.0408
2013-08-10 03:59:15	27.21	29.5		9.53245	-27.737	-30.0714
2013-08-10 04:09:15	27.21	29.52		9.5394	-27.737	-30.0917	2013-08-10 04:09:15
2013-08-10 04:19:15	27.25	29.55		9.54634	-27.7778	-30.1223
2013-08-10 04:29:15	27.28	29.57		9.55329	-27.8084	-30.1427
2013-08-10 04:39:15	27.3	29.6		9.56023	-27.8287	-30.1733
2013-08-10 04:49:15	27.33	29.62		9.56717	-27.8593	-30.1937
2013-08-10 04:59:15	27.34	29.64		9.57412	-27.8695	-30.2141
2013-08-10 05:09:15	27.37	29.66		9.58106	-27.9001	-30.2345	2013-08-10 05:09:15
2013-08-10 05:19:15	27.38	29.68		9.58801	-27.9103	-30.2548
2013-08-10 05:29:15	27.4	29.71		9.59495	-27.9307	-30.2854
2013-08-10 05:39:15	27.42	29.72		9.6019	-27.9511	-30.2956
2013-08-10 05:49:15	27.46	29.75		9.60884	-27.9918	-30.3262
2013-08-10 05:59:15	27.48	29.78		9.61579	-28.0122	-30.3568
2013-08-10 06:09:15	27.5	29.79		9.62273	-28.0326	-30.367	2013-08-10 06:09:15
2013-08-10 06:19:15	27.54	29.83		9.62967	-28.0734	-30.4077
2013-08-10 06:29:15	27.54	29.83		9.63662	-28.0734	-30.4077
2013-08-10 06:39:15	27.57	29.86		9.64356	-28.104	-30.4383
2013-08-10 06:49:15	27.59	29.89		9.65051	-28.1244	-30.4689
2013-08-10 06:59:15	27.63	29.91		9.65745	-28.1651	-30.4893
2013-08-10 07:09:15	27.63	29.92		9.6644	-28.1651	-30.4995	2013-08-10 07:09:15
2013-08-10 07:19:15	27.66	29.96		9.67134	-28.1957	-30.5403
2013-08-10 07:29:15	27.69	29.98		9.67829	-28.2263	-30.5607
2013-08-10 07:39:15	27.72	30		9.68523	-28.2569	-30.581
2013-08-10 07:49:15	27.73	30.02		9.69217	-28.2671	-30.6014
2013-08-10 07:59:15	27.75	30.05		9.69912	-28.2875	-30.632
2013-08-10 08:09:15	27.77	30.06		9.70606	-28.3078	-30.6422	2013-08-10 08:09:15
2013-08-10 08:19:15	27.82	30.1		9.71301	-28.3588	-30.683
2013-08-10 08:29:15	27.86	30.14		9.71995	-28.3996	-30.7238
2013-08-10 08:39:15	27.85	30.14		9.7269	-28.3894	-30.7238
2013-08-10 08:49:15	27.87	30.17		9.73384	-28.4098	-30.7543
2013-08-10 08:59:15	27.92	30.21		9.74079	-28.4608	-30.7951
2013-08-10 09:09:15	27.94	30.22		9.74773	-28.4811	-30.8053	2013-08-10 09:09:15
2013-08-10 09:19:15	27.95	30.25		9.75467	-28.4913	-30.8359
2013-08-10 09:29:15	27.59	29.89		9.76162	-28.1244	-30.4689
2013-08-10 09:39:15	27.78	30.07		9.76856	-28.318	-30.6524
2013-08-10 09:59:15	27.97	30.28		9.78245	-28.5117	-30.8665
2013-08-10 10:09:15	28.02	30.31		9.7894	-28.5627	-30.897
2013-08-10 10:19:15	28.03	30.33		9.79634	-28.5729	-30.9174	2013-08-10 10:19:15
2013-08-10 10:29:15	28.07	30.37		9.80329	-28.6137	-30.9582
2013-08-10 10:39:15	28.09	30.38		9.81023	-28.634	-30.9684
2013-08-10 10:49:15	28.14	30.42		9.81717	-28.685	-31.0092
2013-08-10 10:59:15	28.16	30.45		9.82412	-28.7054	-31.0398
2013-08-10 11:09:15	28.2	30.5		9.83106	-28.7462	-31.0907
2013-08-10 11:19:15	28.19	30.49		9.83801	-28.736	-31.0805	2013-08-10 11:19:15
2013-08-10 11:29:15	28.23	30.53		9.84495	-28.7768	-31.1213
2013-08-10 11:39:15	28.28	30.57		9.8519	-28.8277	-31.1621
2013-08-10 11:49:15	28.3	30.61		9.85884	-28.8481	-31.2029
2013-08-10 11:59:15	28.31	30.62		9.86579	-28.8583	-31.213
2013-08-10 12:09:15	28.35	30.65		9.87273	-28.8991	-31.2436
2013-08-10 12:19:15	28.37	30.66		9.87967	-28.9195	-31.2538	2013-08-10 12:19:15
2013-08-10 12:29:15	28.41	30.7		9.88662	-28.9602	-31.2946
2013-08-10 12:39:15	28.43	30.72		9.89356	-28.9806	-31.315
2013-08-10 12:49:15	28.44	30.74		9.90051	-28.9908	-31.3354
2013-08-10 12:59:15	28.48	30.78		9.90745	-29.0316	-31.3761
2013-08-10 13:09:15	28.51	30.79		9.9144	-29.0622	-31.3863
2013-08-10 13:19:15	28.53	30.82		9.92134	-29.0826	-31.4169	2013-08-10 13:19:15
2013-08-10 13:29:15	28.55	30.84		9.92829	-29.103	-31.4373
2013-08-10 13:39:15	28.58	30.88		9.93523	-29.1335	-31.4781
2013-08-10 13:49:15	28.61	30.9		9.94217	-29.1641	-31.4985
2013-08-10 13:59:15	28.64	30.94		9.94912	-29.1947	-31.5392
2013-08-10 14:09:15	28.66	30.95		9.95606	-29.2151	-31.5494
2013-08-10 14:19:15	28.69	30.99		9.96301	-29.2457	-31.5902	2013-08-10 14:19:15
2013-08-10 14:29:15	28.71	31.01		9.96995	-29.2661	-31.6106
2013-08-10 14:39:15	28.76	31.05		9.9769	-29.317	-31.6514
2013-08-10 14:49:15	28.76	31.05		9.98384	-29.317	-31.6514
2013-08-10 14:59:15	28.78	31.08		9.99079	-29.3374	-31.682
2013-08-10 15:09:15	28.83	31.12		9.99773	-29.3884	-31.7227
2013-08-10 15:19:15	28.86	31.16		10.0047	-29.419	-31.7635	2013-08-10 15:19:15
2013-08-10 15:29:15	28.89	31.17		10.0116	-29.4495	-31.7737
2013-08-10 15:39:15	28.92	31.21		10.0186	-29.4801	-31.8145
2013-08-10 15:49:15	28.93	31.22		10.0255	-29.4903	-31.8247
2013-08-10 15:59:15	28.96	31.27		10.0325	-29.5209	-31.8756
2013-08-10 16:09:15	28.97	31.28		10.0394	-29.5311	-31.8858
2013-08-10 16:19:15	29.02	31.32		10.0463	-29.5821	-31.9266	2013-08-10 16:19:15
2013-08-10 16:29:15	29.07	31.37		10.0533	-29.633	-31.9776
2013-08-10 16:39:15	29.09	31.4		10.0602	-29.6534	-32.0082
2013-08-10 16:49:15	29.12	31.42		10.0672	-29.684	-32.0285
2013-08-10 16:59:15	29.19	31.46		10.0741	-29.7554	-32.0693
2013-08-10 17:09:15	29.21	31.51		10.0811	-29.7757	-32.1203
2013-08-10 17:19:15	29.24	31.52		10.088	-29.8063	-32.1305	2013-08-10 17:19:15
2013-08-10 17:29:15	29.26	31.55		10.095	-29.8267	-32.1611
2013-08-10 17:39:15	29.3	31.6		10.1019	-29.8675	-32.212
2013-08-10 17:49:15	28.67	31		10.1088	-29.2253	-31.6004
2013-08-10 17:59:15	29	31.32		10.1158	-29.5617	-31.9266
2013-08-10 18:09:15	29.2	31.5		10.1227	-29.7655	-32.1101
2013-08-10 18:19:15	29.31	31.61		10.1297	-29.8777	-32.2222	2013-08-10 18:19:15
2013-08-10 18:29:15	29.35	31.65		10.1366	-29.9185	-32.263
2013-08-10 18:39:15	29.39	31.69		10.1436	-29.9592	-32.3038
2013-08-10 18:49:15	29.42	31.71		10.1505	-29.9898	-32.3242
2013-08-10 18:59:15	29.47	31.77		10.1575	-30.0408	-32.3853
2013-08-10 19:09:15	29.51	31.8		10.1644	-30.0815	-32.4159
2013-08-10 19:19:15	29.54	31.84		10.1713	-30.1121	-32.4567	2013-08-10 19:19:15
2013-08-10 19:29:15	29.56	31.85		10.1783	-30.1325	-32.4669
2013-08-10 19:39:15	29.61	31.91		10.1852	-30.1835	-32.528
2013-08-10 19:49:15	29.63	31.93		10.1922	-30.2039	-32.5484
2013-08-10 19:59:15	29.66	31.96		10.1991	-30.2345	-32.579
2013-08-10 20:09:15	29.67	31.97		10.2061	-30.2446	-32.5892
2013-08-10 20:19:15	29.72	32.02		10.213	-30.2956	-32.6402	2013-08-10 20:19:15
2013-08-10 20:29:15	29.75	32.05		10.22	-30.3262	-32.6707
2013-08-10 20:39:15	29.77	32.07		10.2269	-30.3466	-32.6911
2013-08-10 20:49:15	29.83	32.14		10.2338	-30.4077	-32.7625
2013-08-10 20:59:15	29.84	32.15		10.2408	-30.4179	-32.7727
2013-08-10 21:09:15	29.86	32.16		10.2477	-30.4383	-32.7829
2013-08-10 21:19:15	29.89	32.19		10.2547	-30.4689	-32.8135	2013-08-10 21:19:15
2013-08-10 21:29:15	29.92	32.22		10.2616	-30.4995	-32.844
2013-08-10 21:39:15	29.93	32.24		10.2686	-30.5097	-32.8644
2013-08-10 21:49:15	29.96	32.27		10.2755	-30.5403	-32.895
2013-08-10 21:59:15	30	32.31		10.2825	-30.581	-32.9358
2013-08-10 22:09:15	30.03	32.33		10.2894	-30.6116	-32.9562
2013-08-10 22:19:15	30.07	32.35		10.2963	-30.6524	-32.9766	2013-08-10 22:19:15
2013-08-10 22:29:15	30.09	32.39		10.3033	-30.6728	-33.0173
2013-08-10 22:39:15	30.13	32.44		10.3102	-30.7136	-33.0683
2013-08-10 22:49:15	30.17	32.46		10.3172	-30.7543	-33.0887
2013-08-10 22:59:15	30.17	32.48		10.3241	-30.7543	-33.1091
2013-08-10 23:09:15	30.19	32.51		10.3311	-30.7747	-33.1397
2013-08-10 23:19:15	30.22	32.52		10.338	-30.8053	-33.1498	2013-08-10 23:19:15
2013-08-10 23:29:15	30.24	32.55		10.345	-30.8257	-33.1804
2013-08-10 23:39:15	30.29	32.6		10.3519	-30.8767	-33.2314
2013-08-10 23:49:15	30.31	32.61		10.3588	-30.897	-33.2416
2013-08-10 23:59:15	30.34	32.63		10.3658	-30.9276	-33.262
2013-08-11 00:09:15	30.36	32.67		10.3727	-30.948	-33.3028
2013-08-11 00:19:15	30.38	32.69		10.3797	-30.9684	-33.3231	2013-08-11 00:19:15
2013-08-11 00:29:15	30.41	32.71		10.3866	-30.999	-33.3435
2013-08-11 00:39:15	30.43	32.73		10.3936	-31.0194	-33.3639
2013-08-11 00:49:15	30.45	32.76		10.4005	-31.0398	-33.3945
2013-08-11 00:59:15	30.46	32.79		10.4075	-31.0499	-33.4251
2013-08-11 01:09:15	30.51	32.81		10.4144	-31.1009	-33.4455
2013-08-11 01:19:15	30.54	32.85		10.4213	-31.1315	-33.4862	2013-08-11 01:19:15
2013-08-11 01:29:15	30.56	32.87		10.4283	-31.1519	-33.5066
2013-08-11 01:39:15	30.6	32.9		10.4352	-31.1927	-33.5372
2013-08-11 01:49:15	30.62	32.93		10.4422	-31.213	-33.5678
2013-08-11 01:59:15	30.64	32.94		10.4491	-31.2334	-33.578
2013-08-11 02:09:15	30.66	32.96		10.4561	-31.2538	-33.5984
2013-08-11 02:19:15	30.7	33.02		10.463	-31.2946	-33.6595	2013-08-11 02:19:15
2013-08-11 02:29:15	30.74	33.04		10.47	-31.3354	-33.6799
2013-08-11 02:39:15	30.77	33.07		10.4769	-31.366	-33.7105
2013-08-11 02:49:15	30.79	33.09		10.4838	-31.3863	-33.7309
2013-08-11 02:59:15	30.81	33.1		10.4908	-31.4067	-33.7411
2013-08-11 03:09:15	30.85	33.16		10.4977	-31.4475	-33.8022
2013-08-11 03:19:15	30.89	33.19		10.5047	-31.4883	-33.8328	2013-08-11 03:19:15
2013-08-11 03:29:15	30.92	33.22		10.5116	-31.5189	-33.8634
2013-08-11 03:39:15	30.95	33.25		10.5186	-31.5494	-33.894
2013-08-11 03:49:15	30.98	33.28		10.5255	-31.58	-33.9246
2013-08-11 03:59:15	31.01	33.31		10.5325	-31.6106	-33.9551
2013-08-11 04:09:15	31.05	33.35		10.5394	-31.6514	-33.9959
2013-08-11 04:19:15	31.07	33.38		10.5463	-31.6718	-34.0265	2013-08-11 04:19:15
2013-08-11 04:29:15	31.11	33.42		10.5533	-31.7125	-34.0673
2013-08-11 04:39:15	31.14	33.45		10.5602	-31.7431	-34.0979
2013-08-11 04:59:15	31.2	33.51		10.5741	-31.8043	-34.159
2013-08-11 05:09:15	31.24	33.55		10.5811	-31.8451	-34.1998
2013-08-11 05:19:15	31.26	33.57		10.588	-31.8654	-34.2202
2013-08-11 05:29:15	30.92	33.21		10.595	-31.5189	-33.8532	2013-08-11 05:29:15
2013-08-11 05:39:15	31.16	33.45		10.6019	-31.7635	-34.0979
2013-08-11 05:49:15	31.29	33.59		10.6088	-31.896	-34.2406
2013-08-11 05:59:15	31.34	33.64		10.6158	-31.947	-34.2915
2013-08-11 06:09:15	31.39	33.69		10.6227	-31.998	-34.3425
2013-08-11 06:19:15	31.44	33.74		10.6297	-32.0489	-34.3935
2013-08-11 06:29:15	31.48	33.78		10.6366	-32.0897	-34.4343	2013-08-11 06:29:15
2013-08-11 06:39:15	31.52	33.83		10.6436	-32.1305	-34.4852
2013-08-11 06:49:15	31.57	33.87		10.6505	-32.1814	-34.526
2013-08-11 06:59:15	31.57	33.89		10.6575	-32.1814	-34.5464
2013-08-11 07:09:15	31.63	33.94		10.6644	-32.2426	-34.5973
2013-08-11 07:19:15	31.67	33.98		10.6713	-32.2834	-34.6381
2013-08-11 07:29:15	31.71	34.02		10.6783	-32.3242	-34.6789	2013-08-11 07:29:15
2013-08-11 07:39:15	31.71	34.05		10.6852	-32.3242	-34.7095
2013-08-11 07:49:15	31.77	34.08		10.6922	-32.3853	-34.7401
2013-08-11 07:59:15	31.8	34.12		10.6991	-32.4159	-34.7808
2013-08-11 08:09:15	31.83	34.14		10.7061	-32.4465	-34.8012
2013-08-11 08:19:15	31.87	34.18		10.713	-32.4873	-34.842
2013-08-11 08:29:15	31.91	34.22		10.72	-32.528	-34.8828	2013-08-11 08:29:15
2013-08-11 08:39:15	31.95	34.25		10.7269	-32.5688	-34.9134
2013-08-11 08:49:15	31.99	34.3		10.7338	-32.6096	-34.9643
2013-08-11 08:59:15	32.03	34.33		10.7408	-32.6504	-34.9949
2013-08-11 09:09:15	32.06	34.37		10.7477	-32.6809	-35.0357
2013-08-11 09:19:15	32.09	34.4		10.7547	-32.7115	-35.0663
2013-08-11 09:29:15	32.15	34.44		10.7616	-32.7727	-35.107	2013-08-11 09:29:15
2013-08-11 09:39:15	32.18	34.49		10.7686	-32.8033	-35.158
2013-08-11 09:49:15	32.21	34.5		10.7755	-32.8338	-35.1682
2013-08-11 09:59:15	32.24	34.54		10.7825	-32.8644	-35.209
2013-08-11 10:09:15	32.27	34.57		10.7894	-32.895	-35.2396
2013-08-11 10:19:15	32.32	34.61		10.7963	-32.946	-35.2803
2013-08-11 10:29:15	32.33	34.63		10.8033	-32.9562	-35.3007	2013-08-11 10:29:15
2013-08-11 10:39:15	32.37	34.67		10.8102	-32.9969	-35.3415
2013-08-11 10:49:15	32.39	34.7		10.8172	-33.0173	-35.3721
2013-08-11 10:59:15	32.43	34.72		10.8241	-33.0581	-35.3925
2013-08-11 11:09:15	32.46	34.76		10.8311	-33.0887	-35.4332
2013-08-11 11:19:15	32.5	34.81		10.838	-33.1295	-35.4842
2013-08-11 11:29:15	32.52	34.82		10.845	-33.1498	-35.4944	2013-08-11 11:29:15
2013-08-11 11:39:15	32.54	34.87		10.8519	-33.1702	-35.5454
2013-08-11 11:49:15	32.61	34.9		10.8588	-33.2416	-35.5759
2013-08-11 11:59:15	32.63	34.94		10.8658	-33.262	-35.6167
2013-08-11 12:09:15	32.68	35		10.8727	-33.3129	-35.6779
2013-08-11 12:19:15	32.71	35.02		10.8797	-33.3435	-35.6983
2013-08-11 12:29:15	32.76	35.05		10.8866	-33.3945	-35.7288	2013-08-11 12:29:15
2013-08-11 12:39:15	32.81	35.12		10.8936	-33.4455	-35.8002
2013-08-11 12:49:15	32.86	35.15		10.9005	-33.4964	-35.8308
2013-08-11 12:59:15	32.88	35.17		10.9075	-33.5168	-35.8512
2013-08-11 13:09:15	32.96	35.25		10.9144	-33.5984	-35.9327
2013-08-11 13:19:15	32.97	35.25		10.9213	-33.6086	-35.9327
2013-08-11 13:29:15	33.02	35.3		10.9283	-33.6595	-35.9837	2013-08-11 13:29:15
2013-08-11 13:39:15	33.06	35.36		10.9352	-33.7003	-36.0449
2013-08-11 13:49:15	33.11	35.41		10.9422	-33.7513	-36.0958
2013-08-11 13:59:15	33.14	35.44		10.9491	-33.7819	-36.1264
2013-08-11 14:09:15	33.19	35.48		10.9561	-33.8328	-36.1672
2013-08-11 14:19:15	33.23	35.52		10.963	-33.8736	-36.208
2013-08-11 14:29:15	33.26	35.56		10.97	-33.9042	-36.2487	2013-08-11 14:29:15
2013-08-11 14:39:15	33.32	35.62		10.9769	-33.9653	-36.3099
2013-08-11 14:49:15	33.35	35.63		10.9838	-33.9959	-36.3201
2013-08-11 14:59:15	33.38	35.69		10.9908	-34.0265	-36.3812
2013-08-11 15:09:15	33.42	35.71		10.9977	-34.0673	-36.4016
2013-08-11 15:19:15	33.46	35.74		11.0047	-34.1081	-36.4322
2013-08-11 15:29:15	33.52	35.8		11.0116	-34.1692	-36.4934	2013-08-11 15:29:15
2013-08-11 15:39:15	33.54	35.83		11.0186	-34.1896	-36.524
2013-08-11 15:49:15	33.57	35.87		11.0255	-34.2202	-36.5647
2013-08-11 15:59:15	33.62	35.91		11.0325	-34.2712	-36.6055
2013-08-11 16:09:15	33.66	35.95		11.0394	-34.3119	-36.6463
2013-08-11 16:19:15	33.68	35.99		11.0463	-34.3323	-36.6871
2013-08-11 16:29:15	33.71	36.02		11.0533	-34.3629	-36.7176	2013-08-11 16:29:15
2013-08-11 16:39:15	33.8	36.11		11.0602	-34.4546	-36.8094
2013-08-11 16:49:15	33.85	36.13		11.0672	-34.5056	-36.8298
2013-08-11 16:59:15	33.88	36.17		11.0741	-34.5362	-36.8705
2013-08-11 17:09:15	33.91	36.2		11.0811	-34.5668	-36.9011
2013-08-11 17:19:15	33.98	36.3		11.088	-34.6381	-37.0031
2013-08-11 17:29:15	34.03	36.3		11.095	-34.6891	-37.0031	2013-08-11 17:29:15
2013-08-11 17:39:15	34.03	36.33		11.1019	-34.6891	-37.0336
2013-08-11 17:49:15	34.09	36.37		11.1088	-34.7503	-37.0744
2013-08-11 17:59:15	34.13	36.44		11.1158	-34.791	-37.1458
2013-08-11 18:09:15	34.18	36.47		11.1227	-34.842	-37.1764
2013-08-11 18:19:15	34.19	36.5		11.1297	-34.8522	-37.2069
2013-08-11 18:29:15	34.25	36.55		11.1366	-34.9134	-37.2579	2013-08-11 18:29:15
2013-08-11 18:39:15	34.32	36.61		11.1436	-34.9847	-37.3191
2013-08-11 18:49:15	34.35	36.64		11.1505	-35.0153	-37.3496
2013-08-11 18:59:15	34.38	36.68		11.1575	-35.0459	-37.3904
2013-08-11 19:09:15	34.43	36.75		11.1644	-35.0968	-37.4618
2013-08-11 19:19:15	34.5	36.79		11.1713	-35.1682	-37.5025
2013-08-11 19:29:15	34.51	36.82		11.1783	-35.1784	-37.5331	2013-08-11 19:29:15
2013-08-11 19:39:15	34.58	36.89		11.1852	-35.2497	-37.6045
2013-08-11 19:49:15	34.63	36.92		11.1922	-35.3007	-37.6351
2013-08-11 19:59:15	34.64	36.94		11.1991	-35.3109	-37.6555
2013-08-11 20:09:15	34.69	36.99		11.2061	-35.3619	-37.7064
2013-08-11 20:19:15	34.71	37.02		11.213	-35.3823	-37.737
2013-08-11 20:29:15	34.44	36.73		11.22	-35.107	-37.4414	2013-08-11 20:29:15
2013-08-11 20:39:15	34.69	36.98		11.2269	-35.3619	-37.6962
2013-08-11 20:49:15	34.78	37.07		11.2338	-35.4536	-37.788
2013-08-11 20:59:15	34.82	37.11		11.2408	-35.4944	-37.8287
2013-08-11 21:09:15	34.85	37.14		11.2477	-35.525	-37.8593
2013-08-11 21:19:15	34.91	37.21		11.2547	-35.5861	-37.9307
2013-08-11 21:29:15	34.96	37.26		11.2616	-35.6371	-37.9817	2013-08-11 21:29:15
2013-08-11 21:39:15	34.98	37.29		11.2686	-35.6575	-38.0122
2013-08-11 21:49:15	35.04	37.34		11.2755	-35.7187	-38.0632
2013-08-11 21:59:15	35.08	37.38		11.2825	-35.7594	-38.104
2013-08-11 22:09:15	35.13	37.43		11.2894	-35.8104	-38.1549
2013-08-11 22:19:15	35.14	37.47		11.2963	-35.8206	-38.1957
2013-08-11 22:29:15	34.56	37.54		11.3033	-35.2294	-38.2671	2013-08-11 22:29:15
2013-08-11 22:39:15	35.29	37.58		11.3102	-35.9735	-38.3078
2013-08-11 22:49:15	35.32	37.61		11.3172	-36.0041	-38.3384
2013-08-11 22:59:15	35.34	37.65		11.3241	-36.0245	-38.3792
2013-08-11 23:09:15	35.4	37.69		11.3311	-36.0856	-38.42
2013-08-11 23:19:15	35.44	37.74		11.338	-36.1264	-38.4709
2013-08-11 23:29:15	35.48	37.78		11.345	-36.1672	-38.5117	2013-08-11 23:29:15
2013-08-11 23:39:15	35.51	37.83		11.3519	-36.1978	-38.5627
2013-08-11 23:49:15	35.55	37.85		11.3588	-36.2385	-38.5831
2013-08-11 23:59:15	35.59	37.88		11.3658	-36.2793	-38.6137
2013-08-12 00:09:15	35.64	37.93		11.3727	-36.3303	-38.6646
2013-08-12 00:19:15	35.69	37.98		11.3797	-36.3812	-38.7156
2013-08-12 00:29:15	35.73	38.03		11.3866	-36.422	-38.7666	2013-08-12 00:29:15
2013-08-12 00:39:15	35.77	38.08		11.3936	-36.4628	-38.8175
2013-08-12 00:49:15	35.81	38.12		11.4005	-36.5036	-38.8583
2013-08-12 00:59:15	35.86	38.17		11.4075	-36.5545	-38.9093
2013-08-12 01:09:15	35.92	38.22		11.4144	-36.6157	-38.9602
2013-08-12 01:19:15	35.96	38.27		11.4213	-36.6565	-39.0112
2013-08-12 01:29:15	35.99	38.29		11.4283	-36.6871	-39.0316	2013-08-12 01:29:15
2013-08-12 01:39:15	36.02	38.33		11.4352	-36.7176	-39.0724
2013-08-12 01:49:15	36.07	38.37		11.4422	-36.7686	-39.1131
2013-08-12 01:59:15	36.13	38.43		11.4491	-36.8298	-39.1743
2013-08-12 02:09:15	36.17	38.48		11.4561	-36.8705	-39.2253
2013-08-12 02:19:15	36.21	38.5		11.463	-36.9113	-39.2457
2013-08-12 02:29:15	36.24	38.54		11.47	-36.9419	-39.2864	2013-08-12 02:29:15
2013-08-12 02:39:15	36.29	38.6		11.4769	-36.9929	-39.3476
2013-08-12 02:49:15	36.35	38.65		11.4838	-37.054	-39.3986
2013-08-12 02:59:15	36.42	38.71		11.4908	-37.1254	-39.4597
2013-08-12 03:09:15	36.44	38.74		11.4977	-37.1458	-39.4903
2013-08-12 03:19:15	36.49	38.79		11.5047	-37.1967	-39.5413
2013-08-12 03:29:15	36.54	38.83		11.5116	-37.2477	-39.5821	2013-08-12 03:29:15
2013-08-12 03:39:15	36.59	38.88		11.5186	-37.2987	-39.633
2013-08-12 03:49:15	36.62	38.93		11.5255	-37.3293	-39.684
2013-08-12 03:59:15	36.68	38.97		11.5325	-37.3904	-39.7248
2013-08-12 04:09:15	36.73	39.03		11.5394	-37.4414	-39.7859
2013-08-12 04:19:15	36.78	39.09		11.5463	-37.4924	-39.8471
2013-08-12 04:29:15	36.81	39.12		11.5533	-37.5229	-39.8777	2013-08-12 04:29:15
2013-08-12 04:39:15	36.87	39.16		11.5602	-37.5841	-39.9185
2013-08-12 04:49:15	36.9	39.2		11.5672	-37.6147	-39.9592
2013-08-12 04:59:15	36.96	39.24		11.5741	-37.6758	-40
2013-08-12 05:09:15	36.98	39.27		11.5811	-37.6962	-40.0306
2013-08-12 05:19:15	37.01	39.32		11.588	-37.7268	-40.0815
2013-08-12 05:29:15	37.09	39.37		11.595	-37.8084	-40.1325	2013-08-12 05:29:15
2013-08-12 05:39:15	37.1	39.42		11.6019	-37.8186	-40.1835
2013-08-12 05:49:15	37.17	39.47		11.6088	-37.8899	-40.2345
2013-08-12 05:59:15	37.21	39.53		11.6158	-37.9307	-40.2956
2013-08-12 06:09:15	37.27	39.56		11.6227	-37.9918	-40.3262
2013-08-12 06:19:15	37.32	39.63		11.6297	-38.0428	-40.3976
2013-08-12 06:29:15	37.34	39.65		11.6366	-38.0632	-40.4179	2013-08-12 06:29:15
2013-08-12 06:39:15	37.37	39.69		11.6436	-38.0938	-40.4587
2013-08-12 06:49:15	37.44	39.73		11.6505	-38.1651	-40.4995
2013-08-12 06:59:15	37.48	39.78		11.6575	-38.2059	-40.5505
2013-08-12 07:09:15	37.51	39.81		11.6644	-38.2365	-40.581
2013-08-12 07:19:15	37.53	39.84		11.6713	-38.2569	-40.6116
2013-08-12 07:29:15	37.56	39.89		11.6783	-38.2875	-40.6626	2013-08-12 07:29:15
2013-08-12 07:39:15	37.64	39.95		11.6852	-38.369	-40.7238
2013-08-12 07:49:15	37.68	39.98		11.6922	-38.4098	-40.7543
2013-08-12 07:59:15	37.7	40		11.6991	-38.4302	-40.7747
2013-08-12 08:09:15	37.77	40.07		11.7061	-38.5015	-40.8461
2013-08-12 08:19:15	37.81	40.12		11.713	-38.5423	-40.897
2013-08-12 08:29:15	37.86	40.17		11.72	-38.5933	-40.948	2013-08-12 08:29:15
2013-08-12 08:59:15	37.99	40.27		11.7408	-38.7258	-41.0499
2013-08-12 09:09:15	38.03	40.33		11.7477	-38.7666	-41.1111
2013-08-12 09:19:15	38.05	40.34		11.7547	-38.787	-41.1213
2013-08-12 09:29:15	38.08	40.37		11.7616	-38.8175	-41.1519
2013-08-12 09:39:15	38.11	40.41		11.7686	-38.8481	-41.1927
2013-08-12 09:49:15	38.15	40.45		11.7755	-38.8889	-41.2334	2013-08-12 09:49:15
2013-08-12 09:59:15	38.19	40.48		11.7825	-38.9297	-41.264
2013-08-12 10:09:15	38.25	40.56		11.7894	-38.9908	-41.3456
2013-08-12 10:19:15	38.31	40.6		11.7963	-39.052	-41.3863
2013-08-12 10:29:15	38.36	40.65		11.8033	-39.103	-41.4373
2013-08-12 10:39:15	38.4	40.7		11.8102	-39.1437	-41.4883
2013-08-12 10:49:15	38.48	40.78		11.8172	-39.2253	-41.5698	2013-08-12 10:49:15
2013-08-12 10:59:15	38.51	40.8		11.8241	-39.2559	-41.5902
2013-08-12 11:09:15	38.53	40.84		11.8311	-39.2762	-41.631
2013-08-12 11:19:15	38.6	40.9		11.838	-39.3476	-41.6922
2013-08-12 11:29:15	38.69	40.97		11.845	-39.4393	-41.7635
2013-08-12 11:39:15	38.71	41		11.8519	-39.4597	-41.7941
2013-08-12 11:49:15	38.75	41.07		11.8588	-39.5005	-41.8654	2013-08-12 11:49:15
2013-08-12 11:59:15	38.84	41.13		11.8658	-39.5923	-41.9266
2013-08-12 12:09:15	38.86	41.14		11.8727	-39.6126	-41.9368
2013-08-12 12:19:15	38.92	41.23		11.8797	-39.6738	-42.0285
2013-08-12 12:29:15	38.97	41.27		11.8866	-39.7248	-42.0693
2013-08-12 12:39:15	39.01	41.34		11.8936	-39.7655	-42.1407
2013-08-12 12:49:15	38.97	41.26		11.9005	-39.7248	-42.0591	2013-08-12 12:49:15
2013-08-12 12:59:15	39.05	41.36		11.9075	-39.8063	-42.1611
2013-08-12 13:09:15	39.17	41.46		11.9144	-39.9286	-42.263
2013-08-12 13:19:15	39.22	41.5		11.9213	-39.9796	-42.3038
2013-08-12 13:29:15	39.27	41.57		11.9283	-40.0306	-42.3751
2013-08-12 13:39:15	39.35	41.65		11.9352	-40.1121	-42.4567
2013-08-12 13:49:15	39.37	41.68		11.9422	-40.1325	-42.4873	2013-08-12 13:49:15
2013-08-12 13:59:15	39.43	41.75		11.9491	-40.1937	-42.5586
2013-08-12 14:09:15	39.5	41.8		11.9561	-40.265	-42.6096
2013-08-12 14:19:15	39.55	41.85		11.963	-40.316	-42.6606
2013-08-12 14:29:15	39.61	41.91		11.97	-40.3772	-42.7217
2013-08-12 14:39:15	39.65	41.95		11.9769	-40.4179	-42.7625
2013-08-12 14:49:15	39.72	42.02		11.9838	-40.4893	-42.8338	2013-08-12 14:49:15
2013-08-12 14:59:15	39.76	42.05		11.9908	-40.5301	-42.8644
2013-08-12 15:09:15	39.8	42.1		11.9977	-40.5708	-42.9154
2013-08-12 15:19:15	39.87	42.18		12.0047	-40.6422	-42.9969
2013-08-12 15:29:15	39.92	42.21		12.0116	-40.6932	-43.0275
2013-08-12 15:39:15	39.98	42.27		12.0186	-40.7543	-43.0887
2013-08-12 15:49:15	40	42.31		12.0255	-40.7747	-43.1295	2013-08-12 15:49:15
2013-08-12 15:59:15	40.09	42.38		12.0325	-40.8665	-43.2008
2013-08-12 16:09:15	40.11	42.43		12.0394	-40.8869	-43.2518
2013-08-12 16:19:15	40.16	42.46		12.0463	-40.9378	-43.2824
2013-08-12 16:29:15	40.21	42.51		12.0533	-40.9888	-43.3333
2013-08-12 16:39:15	40.26	42.57		12.0602	-41.0398	-43.3945
2013-08-12 16:49:15	40.32	42.62		12.0672	-41.1009	-43.4455	2013-08-12 16:49:15
2013-08-12 16:59:15	40.36	42.67		12.0741	-41.1417	-43.4964
2013-08-12 17:09:15	40.41	42.72		12.0811	-41.1927	-43.5474
2013-08-12 17:19:15	40.46	42.77		12.088	-41.2436	-43.5984
2013-08-12 17:29:15	40.47	42.79		12.095	-41.2538	-43.6188
2013-08-12 17:39:15	40.56	42.89		12.1019	-41.3456	-43.7207
2013-08-12 17:49:15	40.62	42.92		12.1088	-41.4067	-43.7513	2013-08-12 17:49:15
2013-08-12 17:59:15	40.94	48.02		12.1158	-41.7329	-48.9501
2013-08-12 18:09:15	40.15	42.47		12.1227	-40.9276	-43.2926
2013-08-12 18:19:15	40.37	42.69		12.1297	-41.1519	-43.5168
2013-08-12 18:29:15	40.58	42.93		12.1366	-41.366	-43.7615
2013-08-12 18:39:15	40.72	43.02		12.1436	-41.5087	-43.8532
2013-08-12 18:49:15	40.77	43.08		12.1505	-41.5596	-43.9144	2013-08-12 18:49:15
2013-08-12 18:59:15	40.83	43.14		12.1575	-41.6208	-43.9755
2013-08-12 19:09:15	40.89	43.21		12.1644	-41.682	-44.0469
2013-08-12 19:19:15	40.93	43.24		12.1713	-41.7227	-44.0775
2013-08-12 19:29:15	41	43.32		12.1783	-41.7941	-44.159
2013-08-12 19:39:15	41.05	43.38		12.1852	-41.8451	-44.2202
2013-08-12 19:49:15	41.1	43.42		12.1922	-41.896	-44.261	2013-08-12 19:49:15
2013-08-12 19:59:15	41.16	43.48		12.1991	-41.9572	-44.3221
2013-08-12 20:09:15	41.22	43.54		12.2061	-42.0183	-44.3833
2013-08-12 20:19:15	41.29	43.61		12.213	-42.0897	-44.4546
2013-08-12 20:29:15	41.35	43.67		12.22	-42.1509	-44.5158
2013-08-12 20:39:15	41.41	43.73		12.2269	-42.212	-44.577
2013-08-12 20:49:15	41.48	43.81		12.2338	-42.2834	-44.6585	2013-08-12 20:49:15
2013-08-12 20:59:15	41.57	43.89		12.2408	-42.3751	-44.7401
2013-08-12 21:09:15	41.62	43.94		12.2477	-42.4261	-44.791
2013-08-12 21:19:15	41.65	43.98		12.2547	-42.4567	-44.8318
2013-08-12 21:29:15	41.73	44.05		12.2616	-42.5382	-44.9032
2013-08-12 21:39:15	41.77	44.07		12.2686	-42.579	-44.9235
2013-08-12 21:49:15	41.82	44.07		12.2755	-42.63	-44.9235	2013-08-12 21:49:15
2013-08-12 21:59:15	41.88	44.2		12.2825	-42.6911	-45.0561
2013-08-12 22:09:15	41.94	44.27		12.2894	-42.7523	-45.1274
2013-08-12 22:19:15	42.01	44.34		12.2963	-42.8236	-45.1988
2013-08-12 22:29:15	42.06	44.39		12.3033	-42.8746	-45.2497
2013-08-12 22:39:15	42.12	44.45		12.3102	-42.9358	-45.3109
2013-08-12 22:49:15	42.18	44.5		12.3172	-42.9969	-45.3619	2013-08-12 22:49:15
2013-08-12 22:59:15	42.23	44.57		12.3241	-43.0479	-45.4332
2013-08-12 23:09:15	42.29	44.63		12.3311	-43.1091	-45.4944
2013-08-12 23:19:15	42.35	44.68		12.338	-43.1702	-45.5454
2013-08-12 23:29:15	42.43	44.76		12.345	-43.2518	-45.6269
2013-08-12 23:39:15	42.5	44.83		12.3519	-43.3231	-45.6983
2013-08-12 23:49:15	42.56	44.9		12.3588	-43.3843	-45.7696	2013-08-12 23:49:15
2013-08-12 23:59:15	42.63	44.93		12.3658	-43.4557	-45.8002
2013-08-13 00:09:15	42.7	45.03		12.3727	-43.527	-45.9021
2013-08-13 00:19:15	42.76	45.08		12.3797	-43.5882	-45.9531
2013-08-13 00:29:15	42.82	45.15		12.3866	-43.6493	-46.0245
2013-08-13 00:39:15	42.9	45.22		12.3936	-43.7309	-46.0958
2013-08-13 00:49:15	42.97	45.28		12.4005	-43.8022	-46.157	2013-08-13 00:49:15
2013-08-13 00:59:15	43	45.35		12.4075	-43.8328	-46.2283
2013-08-13 01:09:15	43.09	45.42		12.4144	-43.9246	-46.2997
2013-08-13 01:19:15	43.17	45.49		12.4213	-44.0061	-46.371
2013-08-13 01:29:15	43.23	45.56		12.4283	-44.0673	-46.4424
2013-08-13 01:39:15	43.29	45.63		12.4352	-44.1284	-46.5138
2013-08-13 01:49:15	43.35	45.69		12.4422	-44.1896	-46.5749	2013-08-13 01:49:15
2013-08-13 01:59:15	43.41	45.75		12.4491	-44.2508	-46.6361
2013-08-13 02:09:15	43.49	45.81		12.4561	-44.3323	-46.6972
2013-08-13 02:19:15	43.55	45.88		12.463	-44.3935	-46.7686
2013-08-13 02:29:15	43.63	45.95		12.47	-44.475	-46.84
2013-08-13 02:39:15	43.66	46.01		12.4769	-44.5056	-46.9011
2013-08-13 02:49:15	43.75	46.09		12.4838	-44.5973	-46.9827	2013-08-13 02:49:15
2013-08-13 02:59:15	43.82	46.16		12.4908	-44.6687	-47.054
2013-08-13 03:09:15	43.87	46.21		12.4977	-44.7197	-47.105
2013-08-13 03:19:15	43.93	46.26		12.5047	-44.7808	-47.156
2013-08-13 03:29:15	44.02	46.36		12.5116	-44.8726	-47.2579
2013-08-13 03:39:15	44.11	46.44		12.5186	-44.9643	-47.3394
2013-08-13 03:49:15	44.17	46.51		12.5255	-45.0255	-47.4108	2013-08-13 03:49:15
2013-08-13 03:59:15	44.24	46.57		12.5325	-45.0968	-47.472
2013-08-13 04:09:15	44.31	46.65		12.5394	-45.1682	-47.5535
2013-08-13 04:19:15	44.39	46.72		12.5463	-45.2497	-47.6249
2013-08-13 04:29:15	44.47	46.8		12.5533	-45.3313	-47.7064
2013-08-13 04:39:15	44.52	46.86		12.5602	-45.3823	-47.7676
2013-08-13 04:49:15	44.6	46.94		12.5672	-45.4638	-47.8491	2013-08-13 04:49:15
2013-08-13 04:59:15	44.69	47.01		12.5741	-45.5556	-47.9205
2013-08-13 05:09:15	44.77	47.1		12.5811	-45.6371	-48.0122
2013-08-13 05:19:15	44.84	47.18		12.588	-45.7085	-48.0938
2013-08-13 05:29:15	44.89	47.24		12.595	-45.7594	-48.1549
2013-08-13 05:39:15	44.99	47.33		12.6019	-45.8614	-48.2467
2013-08-13 05:49:15	45.06	47.39		12.6088	-45.9327	-48.3078	2013-08-13 05:49:15
2013-08-13 05:59:15	45.14	47.47		12.6158	-46.0143	-48.3894
2013-08-13 06:09:15	45.2	47.54		12.6227	-46.0754	-48.4608
2013-08-13 06:19:15	45.3	47.63		12.6297	-46.1774	-48.5525
2013-08-13 06:29:15	45.38	47.71		12.6366	-46.2589	-48.634
2013-08-13 06:39:15	45.43	47.79		12.6436	-46.3099	-48.7156
2013-08-13 06:49:15	45.52	47.86		12.6505	-46.4016	-48.787	2013-08-13 06:49:15
2013-08-13 06:59:15	45.6	47.95		12.6575	-46.4832	-48.8787
2013-08-13 07:09:15	45.67	48.02		12.6644	-46.5545	-48.9501
2013-08-13 07:19:15	45.75	48.1		12.6713	-46.6361	-49.0316
2013-08-13 07:29:15	45.83	48.19		12.6783	-46.7176	-49.1233
2013-08-13 07:39:15	45.93	48.27		12.6852	-46.8196	-49.2049
2013-08-13 07:49:15	46	48.34		12.6922	-46.8909	-49.2762	2013-08-13 07:49:15
2013-08-13 07:59:15	46.09	48.43		12.6991	-46.9827	-49.368
2013-08-13 08:09:15	45.86	48.24		12.7061	-46.7482	-49.1743
2013-08-13 08:19:15	46.11	48.44		12.713	-47.0031	-49.3782
2013-08-13 08:29:15	46.23	48.59		12.72	-47.1254	-49.5311
2013-08-13 08:39:15	46.33	48.66		12.7269	-47.2273	-49.6024
2013-08-13 08:49:15	46.41	48.75		12.7338	-47.3089	-49.6942	2013-08-13 08:49:15
2013-08-13 08:59:15	46.51	48.84		12.7408	-47.4108	-49.7859
2013-08-13 09:09:15	46.61	48.95		12.7477	-47.5127	-49.8981
2013-08-13 09:19:15	46.71	49.05		12.7547	-47.6147	-50
2013-08-13 09:29:15	46.81	49.14		12.7616	-47.7166	-50.0917
2013-08-13 09:39:15	46.87	49.22		12.7686	-47.7778	-50.1733
2013-08-13 09:49:15	46.96	49.3		12.7755	-47.8695	-50.2548	2013-08-13 09:49:15
2013-08-13 09:59:15	47.07	49.4		12.7825	-47.9817	-50.3568
2013-08-13 10:09:15	47.14	49.5		12.7894	-48.053	-50.4587
2013-08-13 10:19:15	47.22	49.57		12.7963	-48.1346	-50.5301
2013-08-13 10:29:15	47.33	49.65		12.8033	-48.2467	-50.6116
2013-08-13 10:39:15	47.38	49.72		12.8102	-48.2977	-50.683
2013-08-13 10:49:15	47.47	49.81		12.8172	-48.3894	-50.7747	2013-08-13 10:49:15
2013-08-13 10:59:15	47.57	49.9		12.8241	-48.4913	-50.8665
2013-08-13 11:09:15	47.63	49.96		12.8311	-48.5525	-50.9276
2013-08-13 11:19:15	47.69	50.05		12.838	-48.6137	-51.0194
2013-08-13 11:39:15	47.87	50.23		12.8519	-48.7971	-51.2029
2013-08-13 11:49:15	47.93	50.29		12.8588	-48.8583	-51.264
2013-08-13 11:59:15	48.08	50.44		12.8658	-49.0112	-51.4169	2013-08-13 11:59:15
2013-08-13 12:09:15	48.18	50.51		12.8727	-49.1131	-51.4883
2013-08-13 12:19:15	48.25	50.6		12.8797	-49.1845	-51.58
2013-08-13 12:29:15	48.34	50.67		12.8866	-49.2762	-51.6514
2013-08-13 12:39:15	48.47	50.84		12.8936	-49.4088	-51.8247
2013-08-13 12:59:15	48.45	50.82		12.9075	-49.3884	-51.8043
2013-08-13 13:09:15	48.72	51.06		12.9144	-49.6636	-52.0489	2013-08-13 13:09:15
2013-08-13 13:19:15	48.79	51.14		12.9213	-49.735	-52.1305
2013-08-13 13:29:15	48.89	51.23		12.9283	-49.8369	-52.2222
2013-08-13 13:39:15	49.01	51.37		12.9352	-49.9592	-52.3649
2013-08-13 13:49:15	49.14	51.48		12.9422	-50.0917	-52.4771
2013-08-13 13:59:15	49.21	51.55		12.9491	-50.1631	-52.5484
2013-08-13 14:09:15	49.35	51.7		12.9561	-50.3058	-52.7013	2013-08-13 14:09:15
2013-08-13 14:19:15	49.43	51.76		12.963	-50.3874	-52.7625
2013-08-13 14:29:15	49.56	51.93		12.97	-50.5199	-52.9358
2013-08-13 14:39:15	49.66	52		12.9769	-50.6218	-53.0071
2013-08-13 14:49:15	49.77	52.14		12.9838	-50.7339	-53.1498
2013-08-13 14:59:15	49.9	52.24		12.9908	-50.8665	-53.2518
2013-08-13 15:09:15	49.97	52.32		12.9977	-50.9378	-53.3333	2013-08-13 15:09:15
2013-08-13 15:19:15	50.13	52.49		13.0047	-51.1009	-53.5066
2013-08-13 15:29:15	50.23	52.57		13.0116	-51.2029	-53.5882
2013-08-13 15:39:15	50.31	52.65		13.0186	-51.2844	-53.6697
2013-08-13 15:49:15	50.38	52.75		13.0255	-51.3558	-53.7717
2013-08-13 15:59:15	50.51	52.86		13.0325	-51.4883	-53.8838
2013-08-13 16:09:15	50.61	52.96		13.0394	-51.5902	-53.9857	2013-08-13 16:09:15
2013-08-13 16:19:15	50.69	53.05		13.0463	-51.6718	-54.0775
2013-08-13 16:29:15	50.78	53.13		13.0533	-51.7635	-54.159
2013-08-13 16:39:15	50.88	53.24		13.0602	-51.8654	-54.2712
2013-08-13 16:49:15	51.01	53.4		13.0672	-51.998	-54.4343
2013-08-13 16:59:15	51.17	53.51		13.0741	-52.1611	-54.5464
2013-08-13 17:09:15	51.24	53.61		13.0811	-52.2324	-54.6483	2013-08-13 17:09:15
2013-08-13 17:19:15	51.34	53.73		13.088	-52.3344	-54.7706
2013-08-13 17:29:15	51.51	53.88		13.095	-52.5076	-54.9235
2013-08-13 17:39:15	51.6	53.94		13.1019	-52.5994	-54.9847
2013-08-13 17:49:15	51.81	54.18		13.1088	-52.8135	-55.2294
2013-08-13 17:59:15	51.89	54.25		13.1158	-52.895	-55.3007
2013-08-13 18:09:15	51.99	54.38		13.1227	-52.9969	-55.4332	2013-08-13 18:09:15
2013-08-13 18:19:15	52.17	54.54		13.1297	-53.1804	-55.5963
2013-08-13 18:29:15	52.26	54.62		13.1366	-53.2722	-55.6779
2013-08-13 18:39:15	52.34	54.7		13.1436	-53.3537	-55.7594
2013-08-13 18:49:15	52.41	54.76		13.1505	-53.4251	-55.8206
2013-08-13 18:59:15	52.52	54.88		13.1575	-53.5372	-55.9429
2013-08-13 19:09:15	52.62	55		13.1644	-53.6391	-56.0652	2013-08-13 19:09:15
2013-08-13 19:19:15	52.77	55.11		13.1713	-53.792	-56.1774
2013-08-13 19:29:15	52.84	55.23		13.1783	-53.8634	-56.2997
2013-08-13 19:39:15	52.95	55.33		13.1852	-53.9755	-56.4016
2013-08-13 19:49:15	53.15	55.5		13.1922	-54.1794	-56.5749
2013-08-13 20:09:15	53.33	55.71		13.2061	-54.3629	-56.789
2013-08-13 20:19:15	53.42	55.78		13.213	-54.4546	-56.8603	2013-08-13 20:19:15
2013-08-13 20:29:15	53.53	55.9		13.22	-54.5668	-56.9827
2013-08-13 20:39:15	53.64	56.01		13.2269	-54.6789	-57.0948
2013-08-13 20:49:15	53.77	56.14		13.2338	-54.8114	-57.2273
2013-08-13 20:59:15	53.84	56.22		13.2408	-54.8828	-57.3089
2013-08-13 21:09:15	53.96	56.33		13.2477	-55.0051	-57.421
2013-08-13 21:19:15	54.06	56.43		13.2547	-55.107	-57.5229	2013-08-13 21:19:15
2013-08-13 21:29:15	54.18	56.54		13.2616	-55.2294	-57.6351
2013-08-13 21:39:15	54.29	56.65		13.2686	-55.3415	-57.7472
2013-08-13 21:49:15	54.41	56.79		13.2755	-55.4638	-57.8899
2013-08-13 21:59:15	54.55	56.91		13.2825	-55.6065	-58.0122
2013-08-13 22:09:15	54.67	57.05		13.2894	-55.7288	-58.1549
2013-08-13 22:19:15	54.78	57.17		13.2963	-55.841	-58.2773	2013-08-13 22:19:15
2013-08-13 22:29:15	54.9	57.29		13.3033	-55.9633	-58.3996
2013-08-13 22:39:15	55.04	57.42		13.3102	-56.106	-58.5321
2013-08-13 22:49:15	55.17	57.55		13.3172	-56.2385	-58.6646
2013-08-13 22:59:15	55.29	57.68		13.3241	-56.3609	-58.7971
2013-08-13 23:09:15	55.42	57.8		13.3311	-56.4934	-58.9195
2013-08-13 23:19:15	55.55	57.94		13.338	-56.6259	-59.0622	2013-08-13 23:19:15
2013-08-13 23:29:15	55.68	58.04		13.345	-56.7584	-59.1641
2013-08-13 23:39:15	55.81	58.2		13.3519	-56.8909	-59.3272
2013-08-13 23:49:15	55.96	58.33		13.3588	-57.0438	-59.4597
2013-08-13 23:59:15	56.09	58.47		13.3658	-57.1764	-59.6024
2013-08-14 00:09:15	56.21	58.59		13.3727	-57.2987	-59.7248
2013-08-14 00:19:15	56.34	58.71		13.3797	-57.4312	-59.8471	2013-08-14 00:19:15
2013-08-14 00:29:15	56.49	58.88		13.3866	-57.5841	-60.0204
2013-08-14 00:39:15	56.65	59.01		13.3936	-57.7472	-60.1529
2013-08-14 00:49:15	56.76	59.14		13.4005	-57.8593	-60.2854
2013-08-14 00:59:15	56.89	59.28		13.4075	-57.9918	-60.4281
2013-08-14 01:09:15	57.04	59.42		13.4144	-58.1448	-60.5708
2013-08-14 01:19:15	57.07	59.54		13.4213	-58.1753	-60.6932	2013-08-14 01:19:15
2013-08-14 01:29:15	57.29	59.69		13.4283	-58.3996	-60.8461
2013-08-14 01:39:15	57.45	59.83		13.4352	-58.5627	-60.9888
2013-08-14 01:49:15	57.6	59.97		13.4422	-58.7156	-61.1315
2013-08-14 01:59:15	57.72	60.1		13.4491	-58.8379	-61.264
2013-08-14 02:09:15	57.85	60.25		13.4561	-58.9704	-61.4169
2013-08-14 02:19:15	58	60.39		13.463	-59.1233	-61.5596	2013-08-14 02:19:15
2013-08-14 02:29:15	58.14	60.53		13.47	-59.2661	-61.7023
2013-08-14 02:39:15	58.28	60.67		13.4769	-59.4088	-61.8451
2013-08-14 02:49:15	58.42	60.82		13.4838	-59.5515	-61.998
2013-08-14 02:59:15	58.56	60.96		13.4908	-59.6942	-62.1407
2013-08-14 03:09:15	58.7	61.09		13.4977	-59.8369	-62.2732
2013-08-14 03:19:15	58.85	61.23		13.5047	-59.9898	-62.4159	2013-08-14 03:19:15
2013-08-14 03:29:15	58.98	61.34		13.5116	-60.1223	-62.528
2013-08-14 03:39:15	59.13	61.52		13.5186	-60.2752	-62.7115
2013-08-14 03:49:15	59.25	61.65		13.5255	-60.3976	-62.844
2013-08-14 03:59:15	59.39	61.8		13.5325	-60.5403	-62.9969
2013-08-14 04:09:15	59.54	61.92		13.5394	-60.6932	-63.1193
2013-08-14 04:19:15	59.66	62.07		13.5463	-60.8155	-63.2722	2013-08-14 04:19:15
2013-08-14 04:29:15	59.77	62.21		13.5533	-60.9276	-63.4149
2013-08-14 04:39:15	59.94	62.35		13.5602	-61.1009	-63.5576
2013-08-14 04:49:15	60.12	62.51		13.5672	-61.2844	-63.7207
2013-08-14 04:59:15	60.26	62.66		13.5741	-61.4271	-63.8736
2013-08-14 05:09:15	60.39	62.78		13.5811	-61.5596	-63.9959
2013-08-14 05:19:15	60.52	62.92		13.588	-61.6922	-64.1386	2013-08-14 05:19:15
2013-08-14 05:29:15	60.66	63.05		13.595	-61.8349	-64.2712
2013-08-14 05:39:15	60.78	63.18		13.6019	-61.9572	-64.4037
2013-08-14 05:49:15	60.91	63.3		13.6088	-62.0897	-64.526
2013-08-14 05:59:15	61.09	63.49		13.6158	-62.2732	-64.7197
2013-08-14 06:09:15	61.23	63.64		13.6227	-62.4159	-64.8726
2013-08-14 06:19:15	61.39	63.8		13.6297	-62.579	-65.0357	2013-08-14 06:19:15
2013-08-14 06:29:15	61.54	63.94		13.6366	-62.7319	-65.1784
2013-08-14 06:39:15	61.72	64.11		13.6436	-62.9154	-65.3517
2013-08-14 06:49:15	61.83	64.23		13.6505	-63.0275	-65.474
2013-08-14 06:59:15	61.99	64.39		13.6575	-63.1906	-65.6371
2013-08-14 07:09:15	62.12	64.42		13.6644	-63.3231	-65.6677
2013-08-14 07:19:15	62.29	64.69		13.6713	-63.4964	-65.9429	2013-08-14 07:19:15
2013-08-14 07:29:15	62.44	64.84		13.6783	-63.6493	-66.0958
2013-08-14 07:39:15	62.57	64.98		13.6852	-63.7819	-66.2385
2013-08-14 07:49:15	62.73	65.15		13.6922	-63.945	-66.4118
2013-08-14 07:59:15	62.42	64.83		13.6991	-63.629	-66.0856
2013-08-14 08:09:15	62.75	65.17		13.7061	-63.9653	-66.4322
2013-08-14 08:19:15	62.95	65.37		13.713	-64.1692	-66.6361	2013-08-14 08:19:15
2013-08-14 08:29:15	63.14	65.55		13.72	-64.3629	-66.8196
2013-08-14 08:39:15	63.3	65.72		13.7269	-64.526	-66.9929
2013-08-14 08:49:15	63.46	65.88		13.7338	-64.6891	-67.156
2013-08-14 08:59:15	63.63	66.05		13.7408	-64.8624	-67.3293
2013-08-14 09:09:15	63.78	66.21		13.7477	-65.0153	-67.4924
2013-08-14 09:19:15	63.97	66.38		13.7547	-65.209	-67.6656	2013-08-14 09:19:15
2013-08-14 09:29:15	64.11	66.54		13.7616	-65.3517	-67.8287
2013-08-14 09:39:15	64.29	66.71		13.7686	-65.5352	-68.002
2013-08-14 09:49:15	64.46	66.88		13.7755	-65.7085	-68.1753
2013-08-14 09:59:15	64.65	67.08		13.7825	-65.9021	-68.3792
2013-08-14 10:09:15	64.81	67.24		13.7894	-66.0652	-68.5423
2013-08-14 10:19:15	64.96	67.37		13.7963	-66.2181	-68.6748	2013-08-14 10:19:15
2013-08-14 10:29:15	65.13	67.56		13.8033	-66.3914	-68.8685
2013-08-14 10:39:15	65.31	67.75		13.8102	-66.5749	-69.0622
2013-08-14 10:49:15	65.47	67.88		13.8172	-66.738	-69.1947
2013-08-14 10:59:15	65.64	68.06		13.8241	-66.9113	-69.3782
2013-08-14 11:09:15	65.81	68.26		13.8311	-67.0846	-69.5821
2013-08-14 11:19:15	65.99	68.42		13.838	-67.2681	-69.7452	2013-08-14 11:19:15
2013-08-14 11:29:15	66.12	68.53		13.845	-67.4006	-69.8573
2013-08-14 11:39:15	66.27	68.7		13.8519	-67.5535	-70.0306
2013-08-14 11:49:15	66.43	68.86		13.8588	-67.7166	-70.1937
2013-08-14 11:59:15	66.58	69.01		13.8658	-67.8695	-70.3466
2013-08-14 12:09:15	66.74	69.17		13.8727	-68.0326	-70.5097
2013-08-14 12:19:15	66.89	69.32		13.8797	-68.1855	-70.6626	2013-08-14 12:19:15
2013-08-14 12:39:15	67	69.45		13.8936	-68.2977	-70.7951
2013-08-14 12:49:15	67.23	69.67		13.9005	-68.5321	-71.0194
2013-08-14 12:59:15	67.41	69.87		13.9075	-68.7156	-71.2232
2013-08-14 13:09:15	67.63	70.05		13.9144	-68.9399	-71.4067
2013-08-14 13:19:15	67.8	70.23		13.9213	-69.1131	-71.5902
2013-08-14 13:29:15	67.99	70.43		13.9283	-69.3068	-71.7941	2013-08-14 13:29:15
2013-08-14 13:39:15	68.19	70.62		13.9352	-69.5107	-71.9878
2013-08-14 13:49:15	68.33	70.76		13.9422	-69.6534	-72.1305
2013-08-14 13:59:15	68.52	70.96		13.9491	-69.8471	-72.3344
2013-08-14 14:09:15	68.71	71.23		13.9561	-70.0408	-72.6096
2013-08-14 14:19:15	69.01	71.41		13.963	-70.3466	-72.7931
2013-08-14 14:29:15	69.16	71.6		13.97	-70.4995	-72.9867	2013-08-14 14:29:15
2013-08-14 14:39:15	69.38	71.86		13.9769	-70.7238	-73.2518
2013-08-14 14:49:15	69.63	72.04		13.9838	-70.9786	-73.4353
2013-08-14 14:59:15	69.76	72.18		13.9908	-71.1111	-73.578
2013-08-14 15:09:15	70.02	72.5		13.9977	-71.3761	-73.9042
2013-08-14 15:19:15	70.21	72.6		14.0047	-71.5698	-74.0061
2013-08-14 15:29:15	70.36	72.8		14.0116	-71.7227	-74.21	2013-08-14 15:29:15
2013-08-14 15:39:15	70.59	73.08		14.0186	-71.9572	-74.4954
2013-08-14 15:49:15	70.84	73.27		14.0255	-72.212	-74.6891
2013-08-14 15:59:15	70.98	73.4		14.0325	-72.3547	-74.8216
2013-08-14 16:09:15	71.2	73.65		14.0394	-72.579	-75.0765
2013-08-14 16:19:15	71.41	73.85		14.0463	-72.7931	-75.2803
2013-08-14 16:29:15	71.56	74.03		14.0533	-72.946	-75.4638	2013-08-14 16:29:15
2013-08-14 16:39:15	71.76	74.21		14.0602	-73.1498	-75.6473
2013-08-14 16:49:15	71.96	74.42		14.0672	-73.3537	-75.8614
[truncated: 2,540 more rows]

## Sheet: Tensi
Zeit [d]	MP bot(2) [cm]	MP top(1) [cm]		air entry bot		AE time	AE [cm]	Type	Pos	Weight
0.0116186	-1.47808	-4.01631		2013-09-01 03:19:15	8800	31.5047	-8970.44	1	2	1
0.0532852	-2.75229	-5.34149					8800
0.0949519	-3.07849	-5.65749		air entry top
0.143563	-3.53721	-6.11621		Time					Pos	Weight
0.199119	-3.98573	-6.54434		41512.6	8800	25.9283	-8970.44	1	1	1
0.240785	-4.29154	-6.87054
0.289396	-4.70948	-7.28848
0.331063	-4.41386	-7.00306
0.37273	-4.96432	-7.54332
0.414396	-5.20897	-7.78797
0.456063	-5.47401	-8.0632
0.49773	-5.72885	-8.31804
0.539396	-5.8002	-8.3792
0.581063	-5.98369	-8.58308
0.62273	-6.23853	-8.82773
0.664396	-6.42202	-9.01121
0.706063	-6.54434	-9.13354
0.74773	-6.54434	-9.12334
0.789396	-6.86035	-9.42915
0.838007	-6.78899	-9.32722
0.879674	-7.17635	-9.70438
0.921341	-6.96228	-9.49032
0.963007	-7.44139	-9.97961
1.00467	-7.7472	-10.2752
1.04634	-7.98165	-10.5097
1.08801	-8.20591	-10.7238
1.12967	-8.27727	-10.8053
1.17134	-8.56269	-11.1009
1.21301	-8.17533	-10.7136
1.26162	-8.36901	-10.9378
1.30329	-8.8685	-11.4169
1.34495	-9.06218	-11.6106
1.39356	-9.24567	-11.8043
1.44217	-9.45973	-11.998
1.48384	-9.57187	-12.1305
1.53245	-9.70438	-12.2732
1.57412	-9.79613	-12.3649
1.61579	-9.92864	-12.4975
1.6644	-10.0714	-12.63
1.70606	-9.82671	-12.3853
1.75467	-9.28644	-11.8451
1.79634	-9.88787	-12.4363
1.83801	-10.1733	-12.7217
1.87967	-10.3568	-12.9052
1.92134	-10.4791	-13.0377
1.96995	-10.6728	-13.2518
2.01162	-10.8359	-13.4047
2.05329	-10.999	-13.5576
2.09495	-11.213	-13.7717
2.13662	-11.315	-13.8736
2.17829	-11.5698	-14.1284
2.2269	-11.7737	-14.3323
2.26856	-11.9368	-14.4954
2.31023	-12.0183	-14.577
2.3519	-12.1509	-14.7095
2.39356	-12.2936	-14.8522
2.43523	-12.3955	-14.9541
2.4769	-12.4873	-15.0459
2.51856	-12.5688	-15.1172
2.56023	-12.6402	-15.209
2.6019	-12.7523	-15.3313
2.64356	-12.8236	-15.3925
2.69217	-12.8236	-15.4027
2.73384	-13.0173	-15.5861
2.77551	-13.1397	-15.7085
2.81717	-13.1702	-15.7492
2.85884	-13.2416	-15.8104
2.90051	-13.3537	-15.9327
2.94217	-13.4862	-16.0449
2.98384	-13.5678	-16.1366
3.03245	-13.6391	-16.2385
3.07412	-13.6799	-16.2589
3.11579	-13.8328	-16.422
3.15745	-13.8736	-16.4424
3.19912	-13.9144	-16.5036
3.24079	-13.9857	-16.5749
3.2894	-14.0469	-16.6259
3.33106	-14.159	-16.7482
3.37967	-14.2813	-16.8705
3.42134	-14.3833	-16.9725
3.46301	-14.3833	-16.9725
3.50467	-14.5464	-17.1254
3.54634	-14.6483	-17.2171
3.58801	-14.7095	-17.3089
3.62967	-14.7808	-17.3802
3.67134	-14.8624	-17.4516
3.71301	-14.9337	-17.5331
3.75467	-15.0153	-17.6249
3.80329	-14.3017	-16.9011
3.84495	-14.8522	-17.4516
3.88662	-15.1274	-17.7268
3.92829	-15.2701	-17.8593
3.9769	-15.3415	-17.9511
4.02551	-15.474	-18.0836
4.06717	-15.5759	-18.1855
4.10884	-15.6779	-18.2875
4.15051	-15.8002	-18.3894
4.19217	-15.9225	-18.5321
4.24079	-15.9429	-18.5627
4.28245	-16.055	-18.6544
4.32412	-16.106	-18.7054
4.36579	-16.1672	-18.7666
4.40745	-16.2487	-18.8583
4.44912	-16.3303	-18.9501
4.49079	-16.4118	-19.0214
4.53245	-16.4628	-19.0724
4.57412	-16.5545	-19.2762
4.61579	-16.6667	-19.4292
4.65745	-16.5953	-19.368
4.69912	-16.7788	-19.5617
4.74079	-16.6667	-19.419
4.78245	-16.9725	-19.7044
4.82412	-17.0948	-19.8063
4.86579	-17.1967	-19.8879
4.90745	-17.2885	-19.9694
4.94912	-17.4006	-20.0612
4.99079	-17.5331	-20.1631
5.0394	-17.7472	-20.3568
5.08106	-17.8899	-20.4791
5.12273	-18.053	-20.632
5.1644	-18.1855	-20.7645
5.20606	-18.3078	-20.8869
5.24773	-18.0326	-20.6116
5.2894	-18.42	-20.999
5.33106	-18.5219	-21.1009
5.37273	-18.6035	-21.1621
5.4144	-18.7054	-21.2538
5.45606	-18.7768	-21.3252
5.49773	-18.8379	-21.3863
5.5394	-18.9297	-21.4679
5.58106	-19.0214	-21.5392
5.62273	-19.052	-21.5902
5.6644	-19.1335	-21.6514
5.70606	-18.8379	-21.3456
5.74773	-19.1233	-21.6208
5.7894	-19.2151	-21.7023
5.83106	-19.317	-21.7941
5.87273	-19.4088	-21.8654
5.92134	-19.4292	-21.8858
5.96301	-19.6534	-22.0999
6.00467	-19.7757	-22.2324
6.05329	-19.9898	-22.4159
6.09495	-20.1325	-22.5586
6.13662	-19.735	-22.1509
6.17829	-20.3058	-22.7217
6.21995	-20.4179	-22.8338
6.26162	-20.5301	-22.9358
6.30329	-20.6116	-23.0173
6.34495	-20.6524	-23.0683
6.38662	-20.5912	-22.9969
6.42829	-20.7543	-23.16
6.46995	-20.8359	-23.2212
6.51162	-20.9276	-23.3028
6.55329	-20.9786	-23.3639
6.59495	-21.0703	-23.4557
6.63662	-21.1315	-23.5168
6.67829	-21.213	-23.5984
6.71995	-20.9888	-23.3741
6.76162	-21.3558	-23.7207
6.80329	-21.4271	-23.8022
6.8519	-21.5392	-23.9042
6.89356	-21.6106	-23.9959
6.93523	-21.2436	-23.6086
6.9769	-21.7023	-24.0571
7.01856	-21.8043	-24.159
7.06023	-21.8654	-24.2202
7.1019	-21.9368	-24.2915
7.14356	-22.0285	-24.3833
7.19217	-21.8145	-24.1794
7.23384	-22.1101	-24.4648
7.27551	-22.1713	-24.5362
7.31717	-22.2528	-24.6177
7.35884	-22.3344	-24.6993
7.40051	-22.4159	-24.7808
7.44217	-22.4975	-24.8522
7.48384	-22.5484	-24.9134
7.52551	-22.6096	-24.9643
7.56717	-22.6809	-25.0357
7.60884	-22.7217	-25.0866
7.65051	-22.7523	-25.107
7.69217	-22.7829	-25.1376
7.73384	-22.8848	-25.2192
7.77551	-22.9562	-25.2905
7.81717	-23.0581	-25.4128
7.85884	-23.1498	-25.5046
7.90051	-23.2212	-25.5759
7.94217	-23.3028	-25.6575
7.98384	-23.4047	-25.7492
8.02551	-23.4557	-25.8206
8.06717	-23.527	-25.9021
8.10884	-23.629	-25.9735
8.15745	-23.7615	-26.0958
8.19912	-23.5474	-25.9021
8.24079	-23.8736	-26.2385
8.28245	-23.9959	-26.3507
8.32412	-24.0877	-26.4424
8.36579	-24.1896	-26.5443
8.40745	-24.2813	-26.6259
8.44912	-24.3629	-26.7176
8.49079	-24.4343	-26.7788
8.53245	-24.526	-26.8807
8.57412	-24.6279	-26.9827
8.61579	-24.7706	-27.1152
8.65745	-24.8828	-27.2273
8.69912	-24.9541	-27.3089
8.74079	-25.0663	-27.4006
8.7894	-25.209	-27.5433
8.83106	-25.3313	-27.6656
8.87273	-25.474	-27.8186
8.9144	-25.6065	-27.9511
8.95606	-25.7085	-28.0734
8.99773	-25.8919	-28.2365
9.0394	-26.055	-28.3894
9.08106	-26.1876	-28.5219
9.12273	-26.371	-28.7258
9.1644	-26.4934	-28.8277
9.20606	-26.6871	-29.0214
9.24773	-26.84	-29.1845
9.2894	-26.9317	-29.2864
9.33106	-27.0744	-29.4088
9.37273	-27.1967	-29.5413
9.4144	-27.3293	-29.6738
9.45606	-27.4822	-29.8267
9.49773	-27.6045	-29.949
9.5394	-27.737	-30.0917
9.58106	-27.9001	-30.2345
9.62273	-28.0326	-30.367
9.6644	-28.1651	-30.4995
9.70606	-28.3078	-30.6422
9.74773	-28.4811	-30.8053
9.79634	-28.5729	-30.9174
9.83801	-28.736	-31.0805
9.87967	-28.9195	-31.2538
9.92134	-29.0826	-31.4169
9.96301	-29.2457	-31.5902
10.0047	-29.419	-31.7635
10.0463	-29.5821	-31.9266
10.088	-29.8063	-32.1305
10.1297	-29.8777	-32.2222
10.1713	-30.1121	-32.4567
10.213	-30.2956	-32.6402
10.2547	-30.4689	-32.8135
10.2963	-30.6524	-32.9766
10.338	-30.8053	-33.1498
10.3797	-30.9684	-33.3231
10.4213	-31.1315	-33.4862
10.463	-31.2946	-33.6595
10.5047	-31.4883	-33.8328
10.5463	-31.6718	-34.0265
10.595	-31.5189	-33.8532
10.6366	-32.0897	-34.4343
10.6783	-32.3242	-34.6789
10.72	-32.528	-34.8828
10.7616	-32.7727	-35.107
10.8033	-32.9562	-35.3007
10.845	-33.1498	-35.4944
10.8866	-33.3945	-35.7288
10.9283	-33.6595	-35.9837
10.97	-33.9042	-36.2487
11.0116	-34.1692	-36.4934
11.0533	-34.3629	-36.7176
11.095	-34.6891	-37.0031
11.1366	-34.9134	-37.2579
11.1783	-35.1784	-37.5331
11.22	-35.107	-37.4414
11.2616	-35.6371	-37.9817
11.3033	-35.2294	-38.2671
11.345	-36.1672	-38.5117
11.3866	-36.422	-38.7666
11.4283	-36.6871	-39.0316
11.47	-36.9419	-39.2864
11.5116	-37.2477	-39.5821
11.5533	-37.5229	-39.8777
11.595	-37.8084	-40.1325
11.6366	-38.0632	-40.4179
11.6783	-38.2875	-40.6626
11.72	-38.5933	-40.948
11.7755	-38.8889	-41.2334
11.8172	-39.2253	-41.5698
11.8588	-39.5005	-41.8654
11.9005	-39.7248	-42.0591
11.9422	-40.1325	-42.4873
11.9838	-40.4893	-42.8338
12.0255	-40.7747	-43.1295
12.0672	-41.1009	-43.4455
12.1088	-41.4067	-43.7513
12.1505	-41.5596	-43.9144
12.1922	-41.896	-44.261
12.2338	-42.2834	-44.6585
12.2755	-42.63	-44.9235
12.3172	-42.9969	-45.3619
12.3588	-43.3843	-45.7696
12.4005	-43.8022	-46.157
12.4422	-44.1896	-46.5749
12.4838	-44.5973	-46.9827
12.5255	-45.0255	-47.4108
12.5672	-45.4638	-47.8491
12.6088	-45.9327	-48.3078
12.6505	-46.4016	-48.787
12.6922	-46.8909	-49.2762
12.7338	-47.3089	-49.6942
12.7755	-47.8695	-50.2548
12.8172	-48.3894	-50.7747
12.8658	-49.0112	-51.4169
12.9144	-49.6636	-52.0489
12.9561	-50.3058	-52.7013
12.9977	-50.9378	-53.3333
13.0394	-51.5902	-53.9857
13.0811	-52.2324	-54.6483
13.1227	-52.9969	-55.4332
13.1644	-53.6391	-56.0652
13.213	-54.4546	-56.8603
13.2547	-55.107	-57.5229
13.2963	-55.841	-58.2773
13.338	-56.6259	-59.0622
13.3797	-57.4312	-59.8471
13.4213	-58.1753	-60.6932
13.463	-59.1233	-61.5596
13.5047	-59.9898	-62.4159
13.5463	-60.8155	-63.2722
13.588	-61.6922	-64.1386
13.6297	-62.579	-65.0357
13.6713	-63.4964	-65.9429
13.713	-64.1692	-66.6361
13.7547	-65.209	-67.6656
13.7963	-66.2181	-68.6748
13.838	-67.2681	-69.7452
13.8797	-68.1855	-70.6626
13.9283	-69.3068	-71.7941
13.97	-70.4995	-72.9867
14.0116	-71.7227	-74.21
14.0533	-72.946	-75.4638
14.095	-74.21	-76.6871
14.1366	-75.3313	-77.8695
14.1783	-76.5545	-79.2151
14.22	-77.9001	-80.4383
14.2616	-79.2661	-81.8043
14.3033	-80.5301	-83.0479
14.345	-81.8451	-84.4037
14.3866	-83.16	-85.7187
14.4283	-84.5973	-87.1662
14.47	-86.0958	-88.6646
14.5116	-87.5841	-90.2039
14.5533	-89.103	-91.7329
14.595	-90.5912	-93.2416
14.6366	-92.1814	-94.8318
14.6783	-93.7717	-96.422
14.72	-95.3415	-98.0428
14.7616	-96.9623	-99.6636
14.8033	-98.4709	-101.193
14.845	-99.949	-102.681
14.8866	-101.529	-104.322
14.9283	-103.303	-106.055
14.97	-104.883	-107.645
15.0116	-106.718	-109.541
15.0533	-108.491	-111.254
15.095	-110.306	-113.191
15.1366	-112.059	-114.944
15.1783	-113.823	-116.738
15.22	-115.657	-118.563
15.2616	-117.564	-120.55
15.3033	-119.348	-122.375
15.345	-121.04	-124.077
15.3866	-122.722	-125.708
15.4283	-124.424	-127.513
15.47	-126.096	-129.205
15.5116	-127.768	-130.907
15.5533	-129.439	-132.589
15.595	-130.999	-134.149
15.6366	-132.599	-135.719
15.6783	-134.2	-137.401
15.72	-135.535	-138.695
15.7616	-137.034	-140.336
15.8033	-138.634	-142.029
15.8519	-140.663	-144.149
15.8936	-142.365	-145.586
15.9422	-144.322	-147.87
15.9838	-145.953	-149.602
16.0255	-147.686	-151.539
16.0672	-149.348	-153.17
16.1088	-150.856	-154.873
16.1505	-152.416	-156.402
16.1922	-153.792	-157.87
16.2338	-155.168	-159.307
16.2755	-156.33	-160.408
16.3172	-157.38	-161.417
16.3588	-158.338	-162.416
16.4005	-159.235	-163.374
16.4422	-160.153	-164.332
16.4838	-161.152	-165.372
16.5255	-161.947	-166.3
16.5741	-162.905	-167.197
16.6158	-163.609	-168.022
16.6644	-164.485	-168.899
16.7061	-165.229	-169.725
16.7477	-165.933	-170.459
16.7894	-166.432	-170.968
16.8311	-167.115	-171.692
16.8727	-167.768	-172.345
16.9144	-168.379	-173.017
16.963	-169.052	-173.792
17.0047	-169.521	-174.261
17.0463	-170.133	-174.852
17.088	-170.703	-175.678
17.1297	-171.284	-176.32
17.1713	-171.916	-177.044
17.213	-172.314	-177.543
17.2547	-172.905	-178.124
17.2963	-173.384	-178.624
17.338	-173.823	-179.001
17.3866	-174.312	-179.551
17.4283	-174.944	-180.204
17.47	-175.331	-180.642
17.5116	-175.719	-181.06
17.5533	-176.106	-181.539
17.595	-176.483	-181.927
17.6366	-176.871	-182.355
17.6783	-177.258	-182.803
17.72	-177.676	-183.211
17.7616	-177.839	-183.578
17.8033	-178.287	-184.098
17.845	-178.675	-184.516
17.8866	-179.083	-185.036
17.9283	-179.409	-185.311
17.97	-179.755	-185.851
18.0116	-180.122	-186.31
18.0533	-180.459	-186.697
18.095	-180.765	-187.064
18.1366	-181.03	-187.38
18.1783	-181.356	-187.829
18.22	-181.56	-188.073
18.2616	-181.916	-188.614
18.3033	-182.171	-188.869
18.345	-182.477	-189.297
18.3866	-182.732	-189.684
18.4283	-182.977	-190.041
18.47	-183.242	-190.418
18.5116	-183.517	-190.795
18.5533	-183.863	-191.315
18.595	-184.159	-191.631
18.6366	-184.597	-192.232
18.6783	-184.883	-192.467
18.72	-184.924	-192.691
18.7616	-185.209	-193.242
18.8033	-185.556	-193.731
18.845	-185.872	-194.23
18.8866	-186.208	-194.72
18.9283	-186.493	-195.178
18.97	-186.789	-195.566
19.0116	-185.301	-193.751
19.0533	-187.319	-196.381
19.095	-187.635	-196.932
19.1366	-187.91	-197.441
19.1783	-188.196	-197.92
19.22	-188.43	-198.389
19.2616	-188.705	-198.756
19.3102	-188.838	-199.062
19.3519	-189.185	-199.745
19.3936	-189.531	-200.296
19.4352	-189.837	-200.846
19.4769	-190.173	-201.397
19.5186	-190.642	-202.11
19.5602	-190.948	-202.671
19.6019	-191.213	-203.242
19.6436	-191.529	-203.812
19.6852	-191.784	-204.363
19.7269	-191.825	-204.577
19.7686	-192.069	-205.178
19.8102	-192.304	-205.81
19.8519	-192.671	-206.463
19.8936	-192.895	-207.054
19.9352	-193.242	-207.768
19.9769	-193.507	-208.42
20.0186	-193.976	-209.327
20.0602	-194.251	-210.102
20.1019	-194.495	-210.724
20.1436	-194.781	-211.498
20.1852	-194.76	-211.947
20.2269	-195.087	-212.783
20.2686	-195.392	-213.527
20.3102	-195.708	-214.424
20.3519	-196.004	-215.25
20.3936	-196.32	-216.188
20.4352	-196.677	-217.095
20.4838	-197.085	-218.328
20.5255	-197.462	-219.235
20.5672	-197.819	-220.336
20.6088	-198.186	-221.417
20.6505	-198.542	-222.569
20.6991	-193.354	-215.341
20.7408	-199.062	-224.689
20.7825	-199.317	-225.841
20.8241	-199.613	-227.044
20.8658	-199.969	-228.685
20.9075	-200.612	-230.357
20.9491	-201.03	-231.845
20.9908	-201.529	-233.435
21.0394	-201.865	-235.229
21.0811	-202.08	-236.932
21.1227	-202.375	-238.552
21.1644	-202.732	-240.398
21.2061	-203.17	-242.446
21.2477	-203.344	-244.159
21.2894	-203.843	-246.208
21.3311	-204.261	-248.471
21.3727	-204.628	-250.479
21.4144	-205.015	-252.773
21.4561	-205.403	-254.689
21.4977	-205.657	-256.769
21.5394	-205.973	-259.562
21.5811	-206.259	-261.876
21.6227	-206.514	-264.302
21.6644	-206.83	-267.492
21.7061	-207.238	-270.061
21.7477	-207.513	-272.579
21.7894	-207.951	-275.637
21.8311	-208.277	-278.991
21.8727	-208.573	-282.803
21.9144	-208.869	-286.218
21.9561	-209.123	-290.367
21.9977	-208.919	-293.16
22.0394	-209.531	-298.614
22.0811	-210.112	-304.108
22.1227	-209.99	-307.319
22.1644	-210.714	-314.659
22.2061	-211.397	-321.427
22.2477	-211.906	-327.309
22.2894	-212.334	-334.699
22.3311	-212.803	-341.397
22.3727	-213.14	-348.593
22.4144	-213.568	-355.015
22.4561	-213.914	-364.139
22.4977	-214.393	-370.591
22.5394	-214.76	-380.377
22.5811	-215.127	-389.317
22.6227	-215.586	-399.572
22.6644	-215.923	-412.538
22.7061	-216.279	-426.871
22.7477	-215.107	-435.423
22.7894	-217.013	-449.531
22.8311	-217.441	-468.338
22.8727	-217.961	-484.332
22.9144	-216.534	-496.616
22.9561	-218.573	-519.032
22.9977	-219.174	-541.315
23.0394	-219.684	-565.494
23.0811	-220.173	-591.814
23.1227	-219.582	-612.813
23.1644	-221.091	-650.805
23.2061	-221.702	-670.652
23.2477	-222.059	-700.01
23.2894	-222.436	-740.693
23.3311	-223.262	-782.426
23.3658	-223.66	-824.771
23.4144	-224.292
23.4561	-224.709
23.4977	-225.311
23.5394	-225.892
23.5811	-226.402
23.6227	-226.942
23.6644	-227.401
23.7061	-227.961
23.7477	-228.563
23.7894	-229.093
23.8311	-223.231
23.8727	-229.613
23.9144	-230.245
23.9561	-231.172
23.9977	-231.713
24.0463	-231.57
24.088	-233.129
24.1297	-233.935
24.1713	-234.241
24.213	-235.81
24.2547	-236.687
24.2963	-237.513
24.338	-238.4
24.3797	-239.113
24.4213	-239.929
24.463	-240.887
24.5047	-241.59
24.5463	-242.508
24.588	-243.272
24.6297	-244.302
24.6713	-245.087
24.713	-246.29
24.7547	-247.146
24.7963	-247.9
24.838	-247.401
24.8797	-250.336
24.9213	-251.733
24.963	-252.803
25.0047	-254.149
25.0463	-255.474
25.088	-257.187
25.1297	-258.634
25.1713	-260.306
25.213	-261.937
25.2547	-263.67
25.2963	-263.649
25.338	-266.942
25.3797	-268.461
25.4213	-270.194
25.463	-272.314
25.5047	-273.935
25.5533	-275.912
25.595	-278.114
25.6366	-280.418
25.6783	-282.813
25.72	-278.338
25.7686	-288.155
25.8102	-291.672
25.8519	-294.424
25.8936	-297.574
25.9352	-300.387
25.9769	-303.18
26.0186	-306.055
26.0602	-309.429
26.1019	-301.182
26.1436	-317.533
26.1852	-323.16
26.2269	-328.277
26.2686	-332.813
26.3102	-337.584
26.3519	-342.905
26.3936	-348.777
26.4352	-352.548
26.4769	-359.45
26.5186	-364.913
26.5602	-372.895
26.6019	-378.869
26.6436	-387.717
26.6852	-395.678
26.7269	-404.149
26.7686	-413.537
26.8102	-424.047
26.8519	-434.924
26.8936	-447.615
26.9352	-460.51
26.9769	-472.803
27.0186	-486.993
27.0602	-501.641
27.1019	-517.411
27.1436	-536.432
27.1852	-557.034
27.2269	-579.817
27.2686	-602.538
27.3102	-623.853

## Sheet: HYDRUS
Data für die Zielfunktion: 2 x Tensionen, 1 x Endwassergehalt					31.7975	Verdunstungsrate
Time	Obs	Type	Pos	Weight		Zeitintervall		Evarate [cm/d]			Type	1-Tension	2-Wassergehalt
0.0116186	-1.47808	1	2	1		1.1925	0	0.216058			Pos	1-top	2-bot	(von oben nach unten)
0.0532852	-2.75229	1	2	1		1.70642	0	0.195097			77	Time-Variable boundary conditions+
0.0949519	-3.07849	1	2	1		1.87759	0	0.197195			31.799	Final Time	Time Information
0.143563	-3.53721	1	2	1		2.17757	0	0.29229			1279	Number of Data Points in Objective Function
0.199119	-3.98573	1	2	1		2.6453	0	0.232295		Interpolated Values	-5.67177	BC-top	[hPa]
0.240785	-4.29154	1	2	1		2.98099	0	0.212409			-4.42177	MP_top_ini	[hPa]	1
0.289396	-4.70948	1	2	1		3.23215	0	0.220274			-1.96429	MP_bot_ini	[hPa]	2
0.331063	-4.41386	1	2	1		3.77549	0	0.163581			-0.714286	BC-bot	[hPa]
0.37273	-4.96432	1	2	1		4.19626	0	0.196512
0.414396	-5.20897	1	2	1		4.71061	0	0.177458
0.456063	-5.47401	1	2	1		4.91105	0	0.203277
0.49773	-5.72885	1	2	1		5.21444	0	0.253455		Real Values	-5.25612	BC-top	cm
0.539396	-5.8002	1	2	1		5.65709	0	0.181389			-4.00612	MP_top_ini	cm
0.581063	-5.98369	1	2	1		5.88389	0	0.168197			-1.4475	MP_bot_ini	cm
0.62273	-6.23853	1	2	1		6.11192	0	0.246122			-0.197503	BC-bot	cm
0.664396	-6.42202	1	2	1		6.69073	0	0.180126			3.93
0.706063	-6.54434	1	2	1		6.89934	0	0.166593			1.42
0.74773	-6.54434	1	2	1		7.16438	0	0.15976
0.789396	-6.86035	1	2	1		7.70155	0	0.139431
0.838007	-6.78899	1	2	1		8.17668	0	0.153854
0.879674	-7.17635	1	2	1		8.74644	0	0.177376
0.921341	-6.96228	1	2	1		8.90384	0	0.194144
0.963007	-7.44139	1	2	1		9.12132	0	0.244296
1.00467	-7.7472	1	2	1		9.74088	0	0.219534
1.04634	-7.98165	1	2	1		10.0887	0	0.226218
1.08801	-8.20591	1	2	1		10.5733	0	0.217654
1.12967	-8.27727	1	2	1		11.1998	0	0.229507
1.17134	-8.56269	1	2	1		11.7111	0	0.215267
1.21301	-8.17533	1	2	1		11.8827	0	0.196621
1.26162	-8.36901	1	2	1		12.0986	0	0.19434
1.30329	-8.8685	1	2	1		12.6878	0	0.196601
1.34495	-9.06218	1	2	1		12.8878	0	0.210673
1.39356	-9.24567	1	2	1		13.1828	0	0.224089
1.44217	-9.45973	1	2	1		13.6789	0	0.205748
1.48384	-9.57187	1	2	1		13.8711	0	0.201538
1.53245	-9.70438	1	2	1		14.0999	0	0.216574
1.57412	-9.79613	1	2	1		14.1129	0	0.214129
1.61579	-9.92864	1	2	1		14.8194	0	0.21343
1.6644	-10.0714	1	2	1		15.0386	0	0.218774
1.70606	-9.82671	1	2	1		15.153	0	0.228688
1.75467	-9.28644	1	2	1		15.7236	0	0.204771
1.79634	-9.88787	1	2	1		15.8763	0	0.206606
1.83801	-10.1733	1	2	1		16.1563	0	0.243931
1.87967	-10.3568	1	2	1		16.7413	0	0.21067
1.92134	-10.4791	1	2	1		16.9833	0	0.193914
1.96995	-10.6728	1	2	1		17.1569	0	0.209394
2.01162	-10.8359	1	2	1		17.7343	0	0.162241
2.05329	-10.999	1	2	1		18.1781	0	0.148956
2.09495	-11.213	1	2	1		18.6928	0	0.125348
2.13662	-11.315	1	2	1		18.9903	0	0.116149
2.17829	-11.5698	1	2	1		19.2733	0	0.112912
2.2269	-11.7737	1	2	1		19.6693	0	0.113485
2.26856	-11.9368	1	2	1		20.1423	0	0.113153
2.31023	-12.0183	1	2	1		20.681	0	0.109003
2.3519	-12.1509	1	2	1		21.2053	0	0.107804
2.39356	-12.2936	1	2	1		21.7064	0	0.0892819
2.43523	-12.3955	1	2	1		21.9593	0	0.0995244
2.4769	-12.4873	1	2	1		22.0804	0	0.0742041
2.51856	-12.5688	1	2	1		22.7197	0	0.0824775
2.56023	-12.6402	1	2	1		22.8918	0	0.0789501
2.6019	-12.7523	1	2	1		23.1003	0	0.0785297
2.64356	-12.8236	1	2	1		23.8058	0	0.0744595
2.69217	-12.8236	1	2	1		24.1382	0	0.0787064
2.73384	-13.0173	1	2	1		24.8137	0	0.0706686
2.77551	-13.1397	1	2	1		25.2716	0	0.0737158
2.81717	-13.1702	1	2	1		25.6978	0	0.0693578
2.85884	-13.2416	1	2	1		26.0806	0	0.067302
2.90051	-13.3537	1	2	1		26.6745	0	0.0632289
2.94217	-13.4862	1	2	1		27.0472	0	0.0584045
2.98384	-13.5678	1	2	1		27.7151	0	0.0535322
3.03245	-13.6391	1	2	1		28.645	0	0.0468205
3.07412	-13.6799	1	2	1		29.0761	0	0.0467919
3.11579	-13.8328	1	2	1		29.7468	0	0.0437784
3.15745	-13.8736	1	2	1		30.1763	0	0.0455656
3.19912	-13.9144	1	2	1		30.7219	0	0.0399034
3.24079	-13.9857	1	2	1		31.1014	0	0.0331602
3.2894	-14.0469	1	2	1		31.799	0	0.0327069
3.33106	-14.159	1	2	1
3.37967	-14.2813	1	2	1
3.42134	-14.3833	1	2	1
3.46301	-14.3833	1	2	1
3.50467	-14.5464	1	2	1
3.54634	-14.6483	1	2	1
3.58801	-14.7095	1	2	1
3.62967	-14.7808	1	2	1
3.67134	-14.8624	1	2	1
3.71301	-14.9337	1	2	1
3.75467	-15.0153	1	2	1
3.80329	-14.3017	1	2	1
3.84495	-14.8522	1	2	1
3.88662	-15.1274	1	2	1
3.92829	-15.2701	1	2	1
3.9769	-15.3415	1	2	1
4.02551	-15.474	1	2	1
4.06717	-15.5759	1	2	1
4.10884	-15.6779	1	2	1
4.15051	-15.8002	1	2	1
4.19217	-15.9225	1	2	1
4.24079	-15.9429	1	2	1
4.28245	-16.055	1	2	1
4.32412	-16.106	1	2	1
4.36579	-16.1672	1	2	1
4.40745	-16.2487	1	2	1
4.44912	-16.3303	1	2	1
4.49079	-16.4118	1	2	1
4.53245	-16.4628	1	2	1
4.57412	-16.5545	1	2	1
4.61579	-16.6667	1	2	1
4.65745	-16.5953	1	2	1
4.69912	-16.7788	1	2	1
4.74079	-16.6667	1	2	1
4.78245	-16.9725	1	2	1
4.82412	-17.0948	1	2	1
4.86579	-17.1967	1	2	1
4.90745	-17.2885	1	2	1
4.94912	-17.4006	1	2	1
4.99079	-17.5331	1	2	1
5.0394	-17.7472	1	2	1
5.08106	-17.8899	1	2	1
5.12273	-18.053	1	2	1
5.1644	-18.1855	1	2	1
5.20606	-18.3078	1	2	1
5.24773	-18.0326	1	2	1
5.2894	-18.42	1	2	1
5.33106	-18.5219	1	2	1
5.37273	-18.6035	1	2	1
5.4144	-18.7054	1	2	1
5.45606	-18.7768	1	2	1
5.49773	-18.8379	1	2	1
5.5394	-18.9297	1	2	1
5.58106	-19.0214	1	2	1
5.62273	-19.052	1	2	1
5.6644	-19.1335	1	2	1
5.70606	-18.8379	1	2	1
5.74773	-19.1233	1	2	1
5.7894	-19.2151	1	2	1
5.83106	-19.317	1	2	1
5.87273	-19.4088	1	2	1
5.92134	-19.4292	1	2	1
5.96301	-19.6534	1	2	1
6.00467	-19.7757	1	2	1
6.05329	-19.9898	1	2	1
6.09495	-20.1325	1	2	1
6.13662	-19.735	1	2	1
6.17829	-20.3058	1	2	1
6.21995	-20.4179	1	2	1
6.26162	-20.5301	1	2	1
6.30329	-20.6116	1	2	1
6.34495	-20.6524	1	2	1
6.38662	-20.5912	1	2	1
6.42829	-20.7543	1	2	1
6.46995	-20.8359	1	2	1
6.51162	-20.9276	1	2	1
6.55329	-20.9786	1	2	1
6.59495	-21.0703	1	2	1
6.63662	-21.1315	1	2	1
6.67829	-21.213	1	2	1
6.71995	-20.9888	1	2	1
6.76162	-21.3558	1	2	1
6.80329	-21.4271	1	2	1
6.8519	-21.5392	1	2	1
6.89356	-21.6106	1	2	1
6.93523	-21.2436	1	2	1
6.9769	-21.7023	1	2	1
7.01856	-21.8043	1	2	1
7.06023	-21.8654	1	2	1
7.1019	-21.9368	1	2	1
7.14356	-22.0285	1	2	1
7.19217	-21.8145	1	2	1
7.23384	-22.1101	1	2	1
7.27551	-22.1713	1	2	1
7.31717	-22.2528	1	2	1
7.35884	-22.3344	1	2	1
7.40051	-22.4159	1	2	1
7.44217	-22.4975	1	2	1
7.48384	-22.5484	1	2	1
7.52551	-22.6096	1	2	1
7.56717	-22.6809	1	2	1
7.60884	-22.7217	1	2	1
7.65051	-22.7523	1	2	1
7.69217	-22.7829	1	2	1
7.73384	-22.8848	1	2	1
7.77551	-22.9562	1	2	1
7.81717	-23.0581	1	2	1
7.85884	-23.1498	1	2	1
7.90051	-23.2212	1	2	1
7.94217	-23.3028	1	2	1
7.98384	-23.4047	1	2	1
8.02551	-23.4557	1	2	1
8.06717	-23.527	1	2	1
8.10884	-23.629	1	2	1
8.15745	-23.7615	1	2	1
8.19912	-23.5474	1	2	1
8.24079	-23.8736	1	2	1
8.28245	-23.9959	1	2	1
8.32412	-24.0877	1	2	1
8.36579	-24.1896	1	2	1
8.40745	-24.2813	1	2	1
8.44912	-24.3629	1	2	1
8.49079	-24.4343	1	2	1
8.53245	-24.526	1	2	1
8.57412	-24.6279	1	2	1
8.61579	-24.7706	1	2	1
8.65745	-24.8828	1	2	1
8.69912	-24.9541	1	2	1
8.74079	-25.0663	1	2	1
8.7894	-25.209	1	2	1
8.83106	-25.3313	1	2	1
8.87273	-25.474	1	2	1
8.9144	-25.6065	1	2	1
8.95606	-25.7085	1	2	1
8.99773	-25.8919	1	2	1
9.0394	-26.055	1	2	1
9.08106	-26.1876	1	2	1
9.12273	-26.371	1	2	1
9.1644	-26.4934	1	2	1
9.20606	-26.6871	1	2	1
9.24773	-26.84	1	2	1
9.2894	-26.9317	1	2	1
9.33106	-27.0744	1	2	1
9.37273	-27.1967	1	2	1
9.4144	-27.3293	1	2	1
9.45606	-27.4822	1	2	1
9.49773	-27.6045	1	2	1
9.5394	-27.737	1	2	1
9.58106	-27.9001	1	2	1
9.62273	-28.0326	1	2	1
9.6644	-28.1651	1	2	1
9.70606	-28.3078	1	2	1
9.74773	-28.4811	1	2	1
9.79634	-28.5729	1	2	1
9.83801	-28.736	1	2	1
9.87967	-28.9195	1	2	1
9.92134	-29.0826	1	2	1
9.96301	-29.2457	1	2	1
10.0047	-29.419	1	2	1
10.0463	-29.5821	1	2	1
10.088	-29.8063	1	2	1
10.1297	-29.8777	1	2	1
10.1713	-30.1121	1	2	1
10.213	-30.2956	1	2	1
10.2547	-30.4689	1	2	1
10.2963	-30.6524	1	2	1
10.338	-30.8053	1	2	1
10.3797	-30.9684	1	2	1
10.4213	-31.1315	1	2	1
10.463	-31.2946	1	2	1
10.5047	-31.4883	1	2	1
10.5463	-31.6718	1	2	1
10.595	-31.5189	1	2	1
10.6366	-32.0897	1	2	1
10.6783	-32.3242	1	2	1
10.72	-32.528	1	2	1
10.7616	-32.7727	1	2	1
10.8033	-32.9562	1	2	1
10.845	-33.1498	1	2	1
10.8866	-33.3945	1	2	1
10.9283	-33.6595	1	2	1
10.97	-33.9042	1	2	1
11.0116	-34.1692	1	2	1
11.0533	-34.3629	1	2	1
11.095	-34.6891	1	2	1
11.1366	-34.9134	1	2	1
11.1783	-35.1784	1	2	1
11.22	-35.107	1	2	1
11.2616	-35.6371	1	2	1
11.3033	-35.2294	1	2	1
11.345	-36.1672	1	2	1
11.3866	-36.422	1	2	1
11.4283	-36.6871	1	2	1
11.47	-36.9419	1	2	1
11.5116	-37.2477	1	2	1
11.5533	-37.5229	1	2	1
11.595	-37.8084	1	2	1
11.6366	-38.0632	1	2	1
11.6783	-38.2875	1	2	1
11.72	-38.5933	1	2	1
11.7755	-38.8889	1	2	1
11.8172	-39.2253	1	2	1
11.8588	-39.5005	1	2	1
11.9005	-39.7248	1	2	1
11.9422	-40.1325	1	2	1
11.9838	-40.4893	1	2	1
12.0255	-40.7747	1	2	1
12.0672	-41.1009	1	2	1
12.1088	-41.4067	1	2	1
12.1505	-41.5596	1	2	1
12.1922	-41.896	1	2	1
12.2338	-42.2834	1	2	1
12.2755	-42.63	1	2	1
12.3172	-42.9969	1	2	1
12.3588	-43.3843	1	2	1
12.4005	-43.8022	1	2	1
12.4422	-44.1896	1	2	1
12.4838	-44.5973	1	2	1
12.5255	-45.0255	1	2	1
12.5672	-45.4638	1	2	1
12.6088	-45.9327	1	2	1
12.6505	-46.4016	1	2	1
12.6922	-46.8909	1	2	1
12.7338	-47.3089	1	2	1
12.7755	-47.8695	1	2	1
12.8172	-48.3894	1	2	1
12.8658	-49.0112	1	2	1
12.9144	-49.6636	1	2	1
12.9561	-50.3058	1	2	1
12.9977	-50.9378	1	2	1
13.0394	-51.5902	1	2	1
13.0811	-52.2324	1	2	1
13.1227	-52.9969	1	2	1
13.1644	-53.6391	1	2	1
13.213	-54.4546	1	2	1
13.2547	-55.107	1	2	1
13.2963	-55.841	1	2	1
13.338	-56.6259	1	2	1
13.3797	-57.4312	1	2	1
13.4213	-58.1753	1	2	1
13.463	-59.1233	1	2	1
13.5047	-59.9898	1	2	1
13.5463	-60.8155	1	2	1
13.588	-61.6922	1	2	1
13.6297	-62.579	1	2	1
13.6713	-63.4964	1	2	1
13.713	-64.1692	1	2	1
13.7547	-65.209	1	2	1
13.7963	-66.2181	1	2	1
13.838	-67.2681	1	2	1
13.8797	-68.1855	1	2	1
13.9283	-69.3068	1	2	1
13.97	-70.4995	1	2	1
14.0116	-71.7227	1	2	1
14.0533	-72.946	1	2	1
14.095	-74.21	1	2	1
14.1366	-75.3313	1	2	1
14.1783	-76.5545	1	2	1
14.22	-77.9001	1	2	1
14.2616	-79.2661	1	2	1
14.3033	-80.5301	1	2	1
14.345	-81.8451	1	2	1
14.3866	-83.16	1	2	1
14.4283	-84.5973	1	2	1
14.47	-86.0958	1	2	1
14.5116	-87.5841	1	2	1
14.5533	-89.103	1	2	1
14.595	-90.5912	1	2	1
14.6366	-92.1814	1	2	1
14.6783	-93.7717	1	2	1
14.72	-95.3415	1	2	1
14.7616	-96.9623	1	2	1
14.8033	-98.4709	1	2	1
14.845	-99.949	1	2	1
14.8866	-101.529	1	2	1
14.9283	-103.303	1	2	1
14.97	-104.883	1	2	1
15.0116	-106.718	1	2	1
15.0533	-108.491	1	2	1
15.095	-110.306	1	2	1
15.1366	-112.059	1	2	1
15.1783	-113.823	1	2	1
15.22	-115.657	1	2	1
15.2616	-117.564	1	2	1
15.3033	-119.348	1	2	1
15.345	-121.04	1	2	1
15.3866	-122.722	1	2	1
15.4283	-124.424	1	2	1
15.47	-126.096	1	2	1
15.5116	-127.768	1	2	1
15.5533	-129.439	1	2	1
15.595	-130.999	1	2	1
15.6366	-132.599	1	2	1
15.6783	-134.2	1	2	1
15.72	-135.535	1	2	1
15.7616	-137.034	1	2	1
15.8033	-138.634	1	2	1
15.8519	-140.663	1	2	1
15.8936	-142.365	1	2	1
15.9422	-144.322	1	2	1
15.9838	-145.953	1	2	1
16.0255	-147.686	1	2	1
16.0672	-149.348	1	2	1
16.1088	-150.856	1	2	1
16.1505	-152.416	1	2	1
16.1922	-153.792	1	2	1
16.2338	-155.168	1	2	1
16.2755	-156.33	1	2	1
16.3172	-157.38	1	2	1
16.3588	-158.338	1	2	1
16.4005	-159.235	1	2	1
16.4422	-160.153	1	2	1
16.4838	-161.152	1	2	1
16.5255	-161.947	1	2	1
16.5741	-162.905	1	2	1
16.6158	-163.609	1	2	1
16.6644	-164.485	1	2	1
16.7061	-165.229	1	2	1
16.7477	-165.933	1	2	1
16.7894	-166.432	1	2	1
16.8311	-167.115	1	2	1
16.8727	-167.768	1	2	1
16.9144	-168.379	1	2	1
16.963	-169.052	1	2	1
17.0047	-169.521	1	2	1
17.0463	-170.133	1	2	1
17.088	-170.703	1	2	1
17.1297	-171.284	1	2	1
17.1713	-171.916	1	2	1
17.213	-172.314	1	2	1
17.2547	-172.905	1	2	1
17.2963	-173.384	1	2	1
17.338	-173.823	1	2	1
17.3866	-174.312	1	2	1
17.4283	-174.944	1	2	1
17.47	-175.331	1	2	1
17.5116	-175.719	1	2	1
17.5533	-176.106	1	2	1
17.595	-176.483	1	2	1
17.6366	-176.871	1	2	1
17.6783	-177.258	1	2	1
17.72	-177.676	1	2	1
17.7616	-177.839	1	2	1
17.8033	-178.287	1	2	1
17.845	-178.675	1	2	1
17.8866	-179.083	1	2	1
17.9283	-179.409	1	2	1
17.97	-179.755	1	2	1
18.0116	-180.122	1	2	1
18.0533	-180.459	1	2	1
18.095	-180.765	1	2	1
18.1366	-181.03	1	2	1
18.1783	-181.356	1	2	1
18.22	-181.56	1	2	1
18.2616	-181.916	1	2	1
18.3033	-182.171	1	2	1
18.345	-182.477	1	2	1
18.3866	-182.732	1	2	1
18.4283	-182.977	1	2	1
18.47	-183.242	1	2	1
18.5116	-183.517	1	2	1
18.5533	-183.863	1	2	1
18.595	-184.159	1	2	1
18.6366	-184.597	1	2	1
18.6783	-184.883	1	2	1
18.72	-184.924	1	2	1
18.7616	-185.209	1	2	1
18.8033	-185.556	1	2	1
18.845	-185.872	1	2	1
18.8866	-186.208	1	2	1
18.9283	-186.493	1	2	1
18.97	-186.789	1	2	1
19.0116	-185.301	1	2	1
19.0533	-187.319	1	2	1
19.095	-187.635	1	2	1
19.1366	-187.91	1	2	1
19.1783	-188.196	1	2	1
19.22	-188.43	1	2	1
19.2616	-188.705	1	2	1
19.3102	-188.838	1	2	1
19.3519	-189.185	1	2	1
19.3936	-189.531	1	2	1
19.4352	-189.837	1	2	1
19.4769	-190.173	1	2	1
19.5186	-190.642	1	2	1
19.5602	-190.948	1	2	1
19.6019	-191.213	1	2	1
19.6436	-191.529	1	2	1
19.6852	-191.784	1	2	1
19.7269	-191.825	1	2	1
19.7686	-192.069	1	2	1
19.8102	-192.304	1	2	1
19.8519	-192.671	1	2	1
19.8936	-192.895	1	2	1
19.9352	-193.242	1	2	1
19.9769	-193.507	1	2	1
20.0186	-193.976	1	2	1
20.0602	-194.251	1	2	1
20.1019	-194.495	1	2	1
20.1436	-194.781	1	2	1
20.1852	-194.76	1	2	1
20.2269	-195.087	1	2	1
20.2686	-195.392	1	2	1
20.3102	-195.708	1	2	1
20.3519	-196.004	1	2	1
20.3936	-196.32	1	2	1
20.4352	-196.677	1	2	1
20.4838	-197.085	1	2	1
20.5255	-197.462	1	2	1
20.5672	-197.819	1	2	1
20.6088	-198.186	1	2	1
20.6505	-198.542	1	2	1
20.6991	-193.354	1	2	1
20.7408	-199.062	1	2	1
20.7825	-199.317	1	2	1
20.8241	-199.613	1	2	1
20.8658	-199.969	1	2	1
20.9075	-200.612	1	2	1
20.9491	-201.03	1	2	1
20.9908	-201.529	1	2	1
21.0394	-201.865	1	2	1
21.0811	-202.08	1	2	1
21.1227	-202.375	1	2	1
21.1644	-202.732	1	2	1
21.2061	-203.17	1	2	1
21.2477	-203.344	1	2	1
21.2894	-203.843	1	2	1
21.3311	-204.261	1	2	1
21.3727	-204.628	1	2	1
21.4144	-205.015	1	2	1
21.4561	-205.403	1	2	1
21.4977	-205.657	1	2	1
21.5394	-205.973	1	2	1
21.5811	-206.259	1	2	1
21.6227	-206.514	1	2	1
21.6644	-206.83	1	2	1
21.7061	-207.238	1	2	1
21.7477	-207.513	1	2	1
21.7894	-207.951	1	2	1
21.8311	-208.277	1	2	1
21.8727	-208.573	1	2	1
21.9144	-208.869	1	2	1
21.9561	-209.123	1	2	1
21.9977	-208.919	1	2	1
22.0394	-209.531	1	2	1
22.0811	-210.112	1	2	1
22.1227	-209.99	1	2	1
22.1644	-210.714	1	2	1
22.2061	-211.397	1	2	1
22.2477	-211.906	1	2	1
22.2894	-212.334	1	2	1
22.3311	-212.803	1	2	1
22.3727	-213.14	1	2	1
22.4144	-213.568	1	2	1
22.4561	-213.914	1	2	1
22.4977	-214.393	1	2	1
22.5394	-214.76	1	2	1
22.5811	-215.127	1	2	1
22.6227	-215.586	1	2	1
22.6644	-215.923	1	2	1
22.7061	-216.279	1	2	1
22.7477	-215.107	1	2	1
22.7894	-217.013	1	2	1
22.8311	-217.441	1	2	1
22.8727	-217.961	1	2	1
22.9144	-216.534	1	2	1
22.9561	-218.573	1	2	1
22.9977	-219.174	1	2	1
23.0394	-219.684	1	2	1
23.0811	-220.173	1	2	1
23.1227	-219.582	1	2	1
23.1644	-221.091	1	2	1
23.2061	-221.702	1	2	1
23.2477	-222.059	1	2	1
23.2894	-222.436	1	2	1
23.3311	-223.262	1	2	1
23.3658	-223.66	1	2	1
23.4144	-224.292	1	2	1
23.4561	-224.709	1	2	1
23.4977	-225.311	1	2	1
23.5394	-225.892	1	2	1
23.5811	-226.402	1	2	1
23.6227	-226.942	1	2	1
23.6644	-227.401	1	2	1
23.7061	-227.961	1	2	1
23.7477	-228.563	1	2	1
23.7894	-229.093	1	2	1
23.8311	-223.231	1	2	1
23.8727	-229.613	1	2	1
23.9144	-230.245	1	2	1
23.9561	-231.172	1	2	1
23.9977	-231.713	1	2	1
24.0463	-231.57	1	2	1
24.088	-233.129	1	2	1
24.1297	-233.935	1	2	1
24.1713	-234.241	1	2	1
24.213	-235.81	1	2	1
24.2547	-236.687	1	2	1
24.2963	-237.513	1	2	1
24.338	-238.4	1	2	1
24.3797	-239.113	1	2	1
24.4213	-239.929	1	2	1
24.463	-240.887	1	2	1
24.5047	-241.59	1	2	1
24.5463	-242.508	1	2	1
24.588	-243.272	1	2	1
24.6297	-244.302	1	2	1
24.6713	-245.087	1	2	1
24.713	-246.29	1	2	1
24.7547	-247.146	1	2	1
24.7963	-247.9	1	2	1
24.838	-247.401	1	2	1
24.8797	-250.336	1	2	1
24.9213	-251.733	1	2	1
24.963	-252.803	1	2	1
25.0047	-254.149	1	2	1
25.0463	-255.474	1	2	1
25.088	-257.187	1	2	1
25.1297	-258.634	1	2	1
25.1713	-260.306	1	2	1
25.213	-261.937	1	2	1
25.2547	-263.67	1	2	1
25.2963	-263.649	1	2	1
25.338	-266.942	1	2	1
25.3797	-268.461	1	2	1
25.4213	-270.194	1	2	1
25.463	-272.314	1	2	1
25.5047	-273.935	1	2	1
25.5533	-275.912	1	2	1
25.595	-278.114	1	2	1
25.6366	-280.418	1	2	1
25.6783	-282.813	1	2	1
25.72	-278.338	1	2	1
25.7686	-288.155	1	2	1
25.8102	-291.672	1	2	1
25.8519	-294.424	1	2	1
25.8936	-297.574	1	2	1
25.9352	-300.387	1	2	1
25.9769	-303.18	1	2	1
26.0186	-306.055	1	2	1
26.0602	-309.429	1	2	1
26.1019	-301.182	1	2	1
26.1436	-317.533	1	2	1
26.1852	-323.16	1	2	1
26.2269	-328.277	1	2	1
26.2686	-332.813	1	2	1
26.3102	-337.584	1	2	1
26.3519	-342.905	1	2	1
26.3936	-348.777	1	2	1
26.4352	-352.548	1	2	1
26.4769	-359.45	1	2	1
26.5186	-364.913	1	2	1
26.5602	-372.895	1	2	1
26.6019	-378.869	1	2	1
26.6436	-387.717	1	2	1
26.6852	-395.678	1	2	1
26.7269	-404.149	1	2	1
26.7686	-413.537	1	2	1
26.8102	-424.047	1	2	1
26.8519	-434.924	1	2	1
26.8936	-447.615	1	2	1
26.9352	-460.51	1	2	1
26.9769	-472.803	1	2	1
27.0186	-486.993	1	2	1
27.0602	-501.641	1	2	1
27.1019	-517.411	1	2	1
27.1436	-536.432	1	2	1
27.1852	-557.034	1	2	1
27.2269	-579.817	1	2	1
27.2686	-602.538	1	2	1
27.3102	-623.853	1	2	1
0.0116186	-4.01631	1	1	1
0.0532852	-5.34149	1	1	1
0.0949519	-5.65749	1	1	1
0.143563	-6.11621	1	1	1
0.199119	-6.54434	1	1	1
0.240785	-6.87054	1	1	1
0.289396	-7.28848	1	1	1
0.331063	-7.00306	1	1	1
0.37273	-7.54332	1	1	1
0.414396	-7.78797	1	1	1
0.456063	-8.0632	1	1	1
0.49773	-8.31804	1	1	1
0.539396	-8.3792	1	1	1
0.581063	-8.58308	1	1	1
0.62273	-8.82773	1	1	1
0.664396	-9.01121	1	1	1
0.706063	-9.13354	1	1	1
0.74773	-9.12334	1	1	1
0.789396	-9.42915	1	1	1
0.838007	-9.32722	1	1	1
0.879674	-9.70438	1	1	1
0.921341	-9.49032	1	1	1
0.963007	-9.97961	1	1	1
1.00467	-10.2752	1	1	1
1.04634	-10.5097	1	1	1
1.08801	-10.7238	1	1	1
1.12967	-10.8053	1	1	1
1.17134	-11.1009	1	1	1
1.21301	-10.7136	1	1	1
1.26162	-10.9378	1	1	1
1.30329	-11.4169	1	1	1
1.34495	-11.6106	1	1	1
1.39356	-11.8043	1	1	1
1.44217	-11.998	1	1	1
1.48384	-12.1305	1	1	1
1.53245	-12.2732	1	1	1
1.57412	-12.3649	1	1	1
1.61579	-12.4975	1	1	1
1.6644	-12.63	1	1	1
1.70606	-12.3853	1	1	1
1.75467	-11.8451	1	1	1
1.79634	-12.4363	1	1	1
1.83801	-12.7217	1	1	1
1.87967	-12.9052	1	1	1
1.92134	-13.0377	1	1	1
1.96995	-13.2518	1	1	1
2.01162	-13.4047	1	1	1
2.05329	-13.5576	1	1	1
2.09495	-13.7717	1	1	1
2.13662	-13.8736	1	1	1
2.17829	-14.1284	1	1	1
2.2269	-14.3323	1	1	1
2.26856	-14.4954	1	1	1
2.31023	-14.577	1	1	1
2.3519	-14.7095	1	1	1
2.39356	-14.8522	1	1	1
2.43523	-14.9541	1	1	1
2.4769	-15.0459	1	1	1
2.51856	-15.1172	1	1	1
2.56023	-15.209	1	1	1
2.6019	-15.3313	1	1	1
2.64356	-15.3925	1	1	1
2.69217	-15.4027	1	1	1
2.73384	-15.5861	1	1	1
2.77551	-15.7085	1	1	1
2.81717	-15.7492	1	1	1
2.85884	-15.8104	1	1	1
2.90051	-15.9327	1	1	1
2.94217	-16.0449	1	1	1
2.98384	-16.1366	1	1	1
3.03245	-16.2385	1	1	1
3.07412	-16.2589	1	1	1
3.11579	-16.422	1	1	1
3.15745	-16.4424	1	1	1
3.19912	-16.5036	1	1	1
3.24079	-16.5749	1	1	1
3.2894	-16.6259	1	1	1
3.33106	-16.7482	1	1	1
3.37967	-16.8705	1	1	1
3.42134	-16.9725	1	1	1
3.46301	-16.9725	1	1	1
3.50467	-17.1254	1	1	1
3.54634	-17.2171	1	1	1
3.58801	-17.3089	1	1	1
3.62967	-17.3802	1	1	1
3.67134	-17.4516	1	1	1
3.71301	-17.5331	1	1	1
3.75467	-17.6249	1	1	1
3.80329	-16.9011	1	1	1
3.84495	-17.4516	1	1	1
3.88662	-17.7268	1	1	1
3.92829	-17.8593	1	1	1
3.9769	-17.9511	1	1	1
4.02551	-18.0836	1	1	1
4.06717	-18.1855	1	1	1
4.10884	-18.2875	1	1	1
4.15051	-18.3894	1	1	1
4.19217	-18.5321	1	1	1
4.24079	-18.5627	1	1	1
4.28245	-18.6544	1	1	1
4.32412	-18.7054	1	1	1
4.36579	-18.7666	1	1	1
4.40745	-18.8583	1	1	1
4.44912	-18.9501	1	1	1
4.49079	-19.0214	1	1	1
4.53245	-19.0724	1	1	1
4.57412	-19.2762	1	1	1
4.61579	-19.4292	1	1	1
4.65745	-19.368	1	1	1
4.69912	-19.5617	1	1	1
4.74079	-19.419	1	1	1
4.78245	-19.7044	1	1	1
4.82412	-19.8063	1	1	1
4.86579	-19.8879	1	1	1
4.90745	-19.9694	1	1	1
4.94912	-20.0612	1	1	1
4.99079	-20.1631	1	1	1
5.0394	-20.3568	1	1	1
5.08106	-20.4791	1	1	1
5.12273	-20.632	1	1	1
5.1644	-20.7645	1	1	1
5.20606	-20.8869	1	1	1
5.24773	-20.6116	1	1	1
5.2894	-20.999	1	1	1
5.33106	-21.1009	1	1	1
5.37273	-21.1621	1	1	1
5.4144	-21.2538	1	1	1
5.45606	-21.3252	1	1	1
5.49773	-21.3863	1	1	1
5.5394	-21.4679	1	1	1
5.58106	-21.5392	1	1	1
5.62273	-21.5902	1	1	1
5.6644	-21.6514	1	1	1
5.70606	-21.3456	1	1	1
5.74773	-21.6208	1	1	1
5.7894	-21.7023	1	1	1
5.83106	-21.7941	1	1	1
5.87273	-21.8654	1	1	1
5.92134	-21.8858	1	1	1
5.96301	-22.0999	1	1	1
6.00467	-22.2324	1	1	1
6.05329	-22.4159	1	1	1
6.09495	-22.5586	1	1	1
6.13662	-22.1509	1	1	1
6.17829	-22.7217	1	1	1
6.21995	-22.8338	1	1	1
6.26162	-22.9358	1	1	1
6.30329	-23.0173	1	1	1
6.34495	-23.0683	1	1	1
6.38662	-22.9969	1	1	1
6.42829	-23.16	1	1	1
6.46995	-23.2212	1	1	1
6.51162	-23.3028	1	1	1
6.55329	-23.3639	1	1	1
6.59495	-23.4557	1	1	1
6.63662	-23.5168	1	1	1
6.67829	-23.5984	1	1	1
6.71995	-23.3741	1	1	1
6.76162	-23.7207	1	1	1
6.80329	-23.8022	1	1	1
6.8519	-23.9042	1	1	1
6.89356	-23.9959	1	1	1
6.93523	-23.6086	1	1	1
6.9769	-24.0571	1	1	1
7.01856	-24.159	1	1	1
7.06023	-24.2202	1	1	1
7.1019	-24.2915	1	1	1
7.14356	-24.3833	1	1	1
7.19217	-24.1794	1	1	1
7.23384	-24.4648	1	1	1
7.27551	-24.5362	1	1	1
7.31717	-24.6177	1	1	1
7.35884	-24.6993	1	1	1
7.40051	-24.7808	1	1	1
7.44217	-24.8522	1	1	1
7.48384	-24.9134	1	1	1
7.52551	-24.9643	1	1	1
7.56717	-25.0357	1	1	1
7.60884	-25.0866	1	1	1
7.65051	-25.107	1	1	1
7.69217	-25.1376	1	1	1
7.73384	-25.2192	1	1	1
7.77551	-25.2905	1	1	1
7.81717	-25.4128	1	1	1
7.85884	-25.5046	1	1	1
7.90051	-25.5759	1	1	1
7.94217	-25.6575	1	1	1
7.98384	-25.7492	1	1	1
8.02551	-25.8206	1	1	1
8.06717	-25.9021	1	1	1
8.10884	-25.9735	1	1	1
8.15745	-26.0958	1	1	1
8.19912	-25.9021	1	1	1
8.24079	-26.2385	1	1	1
8.28245	-26.3507	1	1	1
8.32412	-26.4424	1	1	1
8.36579	-26.5443	1	1	1
8.40745	-26.6259	1	1	1
8.44912	-26.7176	1	1	1
8.49079	-26.7788	1	1	1
8.53245	-26.8807	1	1	1
8.57412	-26.9827	1	1	1
8.61579	-27.1152	1	1	1
8.65745	-27.2273	1	1	1
8.69912	-27.3089	1	1	1
8.74079	-27.4006	1	1	1
8.7894	-27.5433	1	1	1
8.83106	-27.6656	1	1	1
8.87273	-27.8186	1	1	1
8.9144	-27.9511	1	1	1
8.95606	-28.0734	1	1	1
8.99773	-28.2365	1	1	1
9.0394	-28.3894	1	1	1
9.08106	-28.5219	1	1	1
9.12273	-28.7258	1	1	1
9.1644	-28.8277	1	1	1
9.20606	-29.0214	1	1	1
9.24773	-29.1845	1	1	1
9.2894	-29.2864	1	1	1
9.33106	-29.4088	1	1	1
9.37273	-29.5413	1	1	1
9.4144	-29.6738	1	1	1
9.45606	-29.8267	1	1	1
9.49773	-29.949	1	1	1
9.5394	-30.0917	1	1	1
9.58106	-30.2345	1	1	1
9.62273	-30.367	1	1	1
9.6644	-30.4995	1	1	1
9.70606	-30.6422	1	1	1
9.74773	-30.8053	1	1	1
9.79634	-30.9174	1	1	1
9.83801	-31.0805	1	1	1
9.87967	-31.2538	1	1	1
9.92134	-31.4169	1	1	1
9.96301	-31.5902	1	1	1
10.0047	-31.7635	1	1	1
10.0463	-31.9266	1	1	1
10.088	-32.1305	1	1	1
10.1297	-32.2222	1	1	1
10.1713	-32.4567	1	1	1
10.213	-32.6402	1	1	1
10.2547	-32.8135	1	1	1
10.2963	-32.9766	1	1	1
10.338	-33.1498	1	1	1
10.3797	-33.3231	1	1	1
10.4213	-33.4862	1	1	1
10.463	-33.6595	1	1	1
10.5047	-33.8328	1	1	1
10.5463	-34.0265	1	1	1
10.595	-33.8532	1	1	1
10.6366	-34.4343	1	1	1
10.6783	-34.6789	1	1	1
10.72	-34.8828	1	1	1
10.7616	-35.107	1	1	1
10.8033	-35.3007	1	1	1
10.845	-35.4944	1	1	1
10.8866	-35.7288	1	1	1
10.9283	-35.9837	1	1	1
10.97	-36.2487	1	1	1
11.0116	-36.4934	1	1	1
11.0533	-36.7176	1	1	1
11.095	-37.0031	1	1	1
11.1366	-37.2579	1	1	1
11.1783	-37.5331	1	1	1
11.22	-37.4414	1	1	1
11.2616	-37.9817	1	1	1
11.3033	-38.2671	1	1	1
11.345	-38.5117	1	1	1
11.3866	-38.7666	1	1	1
11.4283	-39.0316	1	1	1
11.47	-39.2864	1	1	1
11.5116	-39.5821	1	1	1
11.5533	-39.8777	1	1	1
11.595	-40.1325	1	1	1
11.6366	-40.4179	1	1	1
11.6783	-40.6626	1	1	1
11.72	-40.948	1	1	1
11.7755	-41.2334	1	1	1
11.8172	-41.5698	1	1	1
11.8588	-41.8654	1	1	1
11.9005	-42.0591	1	1	1
11.9422	-42.4873	1	1	1
11.9838	-42.8338	1	1	1
12.0255	-43.1295	1	1	1
12.0672	-43.4455	1	1	1
12.1088	-43.7513	1	1	1
12.1505	-43.9144	1	1	1
12.1922	-44.261	1	1	1
12.2338	-44.6585	1	1	1
12.2755	-44.9235	1	1	1
12.3172	-45.3619	1	1	1
12.3588	-45.7696	1	1	1
12.4005	-46.157	1	1	1
12.4422	-46.5749	1	1	1
12.4838	-46.9827	1	1	1
12.5255	-47.4108	1	1	1
12.5672	-47.8491	1	1	1
12.6088	-48.3078	1	1	1
12.6505	-48.787	1	1	1
12.6922	-49.2762	1	1	1
12.7338	-49.6942	1	1	1
12.7755	-50.2548	1	1	1
12.8172	-50.7747	1	1	1
12.8658	-51.4169	1	1	1
12.9144	-52.0489	1	1	1
12.9561	-52.7013	1	1	1
12.9977	-53.3333	1	1	1
13.0394	-53.9857	1	1	1
13.0811	-54.6483	1	1	1
13.1227	-55.4332	1	1	1
13.1644	-56.0652	1	1	1
13.213	-56.8603	1	1	1
13.2547	-57.5229	1	1	1
13.2963	-58.2773	1	1	1
13.338	-59.0622	1	1	1
13.3797	-59.8471	1	1	1
13.4213	-60.6932	1	1	1
13.463	-61.5596	1	1	1
13.5047	-62.4159	1	1	1
13.5463	-63.2722	1	1	1
13.588	-64.1386	1	1	1
13.6297	-65.0357	1	1	1
13.6713	-65.9429	1	1	1
13.713	-66.6361	1	1	1
13.7547	-67.6656	1	1	1
13.7963	-68.6748	1	1	1
13.838	-69.7452	1	1	1
13.8797	-70.6626	1	1	1
13.9283	-71.7941	1	1	1
13.97	-72.9867	1	1	1
14.0116	-74.21	1	1	1
14.0533	-75.4638	1	1	1
14.095	-76.6871	1	1	1
14.1366	-77.8695	1	1	1
14.1783	-79.2151	1	1	1
14.22	-80.4383	1	1	1
14.2616	-81.8043	1	1	1
14.3033	-83.0479	1	1	1
14.345	-84.4037	1	1	1
14.3866	-85.7187	1	1	1
14.4283	-87.1662	1	1	1
14.47	-88.6646	1	1	1
14.5116	-90.2039	1	1	1
14.5533	-91.7329	1	1	1
14.595	-93.2416	1	1	1
14.6366	-94.8318	1	1	1
14.6783	-96.422	1	1	1
14.72	-98.0428	1	1	1
14.7616	-99.6636	1	1	1
14.8033	-101.193	1	1	1
14.845	-102.681	1	1	1
14.8866	-104.322	1	1	1
14.9283	-106.055	1	1	1
14.97	-107.645	1	1	1
15.0116	-109.541	1	1	1
15.0533	-111.254	1	1	1
15.095	-113.191	1	1	1
15.1366	-114.944	1	1	1
15.1783	-116.738	1	1	1
15.22	-118.563	1	1	1
15.2616	-120.55	1	1	1
15.3033	-122.375	1	1	1
15.345	-124.077	1	1	1
15.3866	-125.708	1	1	1
15.4283	-127.513	1	1	1
15.47	-129.205	1	1	1
15.5116	-130.907	1	1	1
15.5533	-132.589	1	1	1
15.595	-134.149	1	1	1
15.6366	-135.719	1	1	1
15.6783	-137.401	1	1	1
15.72	-138.695	1	1	1
15.7616	-140.336	1	1	1
15.8033	-142.029	1	1	1
15.8519	-144.149	1	1	1
15.8936	-145.586	1	1	1
15.9422	-147.87	1	1	1
15.9838	-149.602	1	1	1
16.0255	-151.539	1	1	1
16.0672	-153.17	1	1	1
16.1088	-154.873	1	1	1
16.1505	-156.402	1	1	1
16.1922	-157.87	1	1	1
16.2338	-159.307	1	1	1
16.2755	-160.408	1	1	1
16.3172	-161.417	1	1	1
16.3588	-162.416	1	1	1
16.4005	-163.374	1	1	1
16.4422	-164.332	1	1	1
16.4838	-165.372	1	1	1
16.5255	-166.3	1	1	1
16.5741	-167.197	1	1	1
16.6158	-168.022	1	1	1
16.6644	-168.899	1	1	1
16.7061	-169.725	1	1	1
16.7477	-170.459	1	1	1
16.7894	-170.968	1	1	1
16.8311	-171.692	1	1	1
16.8727	-172.345	1	1	1
16.9144	-173.017	1	1	1
16.963	-173.792	1	1	1
17.0047	-174.261	1	1	1
17.0463	-174.852	1	1	1
17.088	-175.678	1	1	1
17.1297	-176.32	1	1	1
17.1713	-177.044	1	1	1
17.213	-177.543	1	1	1
17.2547	-178.124	1	1	1
17.2963	-178.624	1	1	1
17.338	-179.001	1	1	1
17.3866	-179.551	1	1	1
17.4283	-180.204	1	1	1
17.47	-180.642	1	1	1
17.5116	-181.06	1	1	1
17.5533	-181.539	1	1	1
17.595	-181.927	1	1	1
17.6366	-182.355	1	1	1
17.6783	-182.803	1	1	1
17.72	-183.211	1	1	1
17.7616	-183.578	1	1	1
17.8033	-184.098	1	1	1
17.845	-184.516	1	1	1
17.8866	-185.036	1	1	1
17.9283	-185.311	1	1	1
17.97	-185.851	1	1	1
18.0116	-186.31	1	1	1
18.0533	-186.697	1	1	1
18.095	-187.064	1	1	1
18.1366	-187.38	1	1	1
18.1783	-187.829	1	1	1
18.22	-188.073	1	1	1
18.2616	-188.614	1	1	1
18.3033	-188.869	1	1	1
18.345	-189.297	1	1	1
18.3866	-189.684	1	1	1
18.4283	-190.041	1	1	1
18.47	-190.418	1	1	1
18.5116	-190.795	1	1	1
18.5533	-191.315	1	1	1
18.595	-191.631	1	1	1
18.6366	-192.232	1	1	1
18.6783	-192.467	1	1	1
18.72	-192.691	1	1	1
18.7616	-193.242	1	1	1
18.8033	-193.731	1	1	1
18.845	-194.23	1	1	1
18.8866	-194.72	1	1	1
18.9283	-195.178	1	1	1
18.97	-195.566	1	1	1
19.0116	-193.751	1	1	1
19.0533	-196.381	1	1	1
19.095	-196.932	1	1	1
19.1366	-197.441	1	1	1
19.1783	-197.92	1	1	1
19.22	-198.389	1	1	1
19.2616	-198.756	1	1	1
19.3102	-199.062	1	1	1
19.3519	-199.745	1	1	1
19.3936	-200.296	1	1	1
19.4352	-200.846	1	1	1
19.4769	-201.397	1	1	1
19.5186	-202.11	1	1	1
19.5602	-202.671	1	1	1
19.6019	-203.242	1	1	1
19.6436	-203.812	1	1	1
19.6852	-204.363	1	1	1
19.7269	-204.577	1	1	1
19.7686	-205.178	1	1	1
19.8102	-205.81	1	1	1
19.8519	-206.463	1	1	1
19.8936	-207.054	1	1	1
19.9352	-207.768	1	1	1
19.9769	-208.42	1	1	1
20.0186	-209.327	1	1	1
20.0602	-210.102	1	1	1
20.1019	-210.724	1	1	1
20.1436	-211.498	1	1	1
20.1852	-211.947	1	1	1
20.2269	-212.783	1	1	1
20.2686	-213.527	1	1	1
20.3102	-214.424	1	1	1
20.3519	-215.25	1	1	1
20.3936	-216.188	1	1	1
20.4352	-217.095	1	1	1
20.4838	-218.328	1	1	1
20.5255	-219.235	1	1	1
20.5672	-220.336	1	1	1
20.6088	-221.417	1	1	1
20.6505	-222.569	1	1	1
20.6991	-215.341	1	1	1
20.7408	-224.689	1	1	1
20.7825	-225.841	1	1	1
20.8241	-227.044	1	1	1
20.8658	-228.685	1	1	1
20.9075	-230.357	1	1	1
20.9491	-231.845	1	1	1
20.9908	-233.435	1	1	1
21.0394	-235.229	1	1	1
21.0811	-236.932	1	1	1
21.1227	-238.552	1	1	1
21.1644	-240.398	1	1	1
21.2061	-242.446	1	1	1
21.2477	-244.159	1	1	1
21.2894	-246.208	1	1	1
21.3311	-248.471	1	1	1
21.3727	-250.479	1	1	1
21.4144	-252.773	1	1	1
21.4561	-254.689	1	1	1
21.4977	-256.769	1	1	1
21.5394	-259.562	1	1	1
21.5811	-261.876	1	1	1
21.6227	-264.302	1	1	1
21.6644	-267.492	1	1	1
21.7061	-270.061	1	1	1
21.7477	-272.579	1	1	1
21.7894	-275.637	1	1	1
21.8311	-278.991	1	1	1
21.8727	-282.803	1	1	1
21.9144	-286.218	1	1	1
21.9561	-290.367	1	1	1
21.9977	-293.16	1	1	1
22.0394	-298.614	1	1	1
22.0811	-304.108	1	1	1
22.1227	-307.319	1	1	1
22.1644	-314.659	1	1	1
22.2061	-321.427	1	1	1
22.2477	-327.309	1	1	1
22.2894	-334.699	1	1	1
22.3311	-341.397	1	1	1
22.3727	-348.593	1	1	1
22.4144	-355.015	1	1	1
22.4561	-364.139	1	1	1
22.4977	-370.591	1	1	1
22.5394	-380.377	1	1	1
22.5811	-389.317	1	1	1
22.6227	-399.572	1	1	1
22.6644	-412.538	1	1	1
22.7061	-426.871	1	1	1
22.7477	-435.423	1	1	1
22.7894	-449.531	1	1	1
22.8311	-468.338	1	1	1
22.8727	-484.332	1	1	1
22.9144	-496.616	1	1	1
22.9561	-519.032	1	1	1
22.9977	-541.315	1	1	1
23.0394	-565.494	1	1	1
23.0811	-591.814	1	1	1
23.1227	-612.813	1	1	1
23.1644	-650.805	1	1	1
23.2061	-670.652	1	1	1
23.2477	-700.01	1	1	1
23.2894	-740.693	1	1	1
23.3311	-782.426	1	1	1
23.3658	-824.771	1	1	1
1.1925	0.894783	2	0	100000
1.70642	0.87473	2	0	100000
1.87759	0.86798	2	0	100000
2.17757	0.850443	2	0	100000
2.6453	0.828713	2	0	100000
2.98099	0.814452	2	0	100000
3.23215	0.803387	2	0	100000
3.77549	0.785612	2	0	100000
4.19626	0.769074	2	0	100000
4.71061	0.750819	2	0	100000
4.91105	0.74267	2	0	100000
5.21444	0.727291	2	0	100000
5.65709	0.711233	2	0	100000
5.88389	0.703603	2	0	100000
6.11192	0.692378	2	0	100000
6.69073	0.671527	2	0	100000
6.89934	0.664576	2	0	100000
7.16438	0.656108	2	0	100000
7.70155	0.641128	2	0	100000
8.17668	0.626508	2	0	100000
8.74644	0.606295	2	0	100000
8.90384	0.600184	2	0	100000
9.12132	0.589558	2	0	100000
9.74088	0.562355	2	0	100000
10.0887	0.546617	2	0	100000
10.5733	0.525525	2	0	100000
11.1998	0.496764	2	0	100000
11.7111	0.474754	2	0	100000
11.8827	0.468004	2	0	100000
12.0986	0.459615	2	0	100000
12.6878	0.436446	2	0	100000
12.8878	0.428018	2	0	100000
13.1828	0.414796	2	0	100000
13.6789	0.394384	2	0	100000
13.8711	0.386634	2	0	100000
14.0999	0.376728	2	0	100000
14.1129	0.376168	2	0	100000
14.8194	0.346009	2	0	100000
15.0386	0.336422	2	0	100000
15.153	0.33119	2	0	100000
15.7236	0.307821	2	0	100000
15.8763	0.30151	2	0	100000
16.1563	0.287849	2	0	100000
16.7413	0.263202	2	0	100000
16.9833	0.253815	2	0	100000
17.1569	0.246545	2	0	100000
17.7343	0.22781	2	0	100000
18.1781	0.214588	2	0	100000
18.6928	0.201686	2	0	100000
18.9903	0.194775	2	0	100000
19.2733	0.188384	2	0	100000
19.6693	0.179396	2	0	100000
20.1423	0.168691	2	0	100000
20.681	0.156947	2	0	100000
21.2053	0.145642	2	0	100000
21.7064	0.136694	2	0	100000
21.9593	0.131661	2	0	100000
22.0804	0.129863	2	0	100000
22.7197	0.119318	2	0	100000
22.8918	0.116601	2	0	100000
23.1003	0.113326	2	0	100000
23.8058	0.10282	2	0	100000
24.1382	0.0975873	2	0	100000
24.8137	0.0880403	2	0	100000
25.2716	0.0812894	2	0	100000
25.6978	0.0753775	2	0	100000
26.0806	0.0702245	2	0	100000
26.6745	0.0627147	2	0	100000
27.0472	0.0583606	2	0	100000
27.7151	0.0512104	2	0	100000
28.645	0.0425022	2	0	100000
29.0761	0.0384677	2	0	100000
29.7468	0.0325957	2	0	100000
30.1763	0.028681	2	0	100000
30.7219	0.0243269	2	0	100000
31.1014	0.0218103	2	0	100000
31.7975	0.0172565	2	0	100000

## Sheet: tens_interpolation
		Datum / Zeit	Tension unten [hPa]	Tension oben [hPa]
m_bot	b_bot	41486.6	1.83	4.24
117.257	-4.8646e+06	41486.6	2.4	4.8
m_top	b_top	41486.6	1.925	4.33333
115.2	-4.77926e+06	y = m*x+b
		AE unten [t]	AE oben [t]
		41227.2
			Brutto-Gewicht [g]	Netto-Gewicht [g]
-1.40314	58626.9	2013-08-23 17:58:52	382.99	12.72
		2013-08-24 10:54:53	382	11.73
-1.40314	58256.7	2013-08-24 06:49:00	382.24	11.9696
			AE unten
m_bot	b_bot	41509.7	1.83	4.24
1.06581	-44239.6	41510.3	2.4	4.8
m_top	b_top	2013-08-24 06:49:00	2.4	4.8
1.04711	-43461	y = m*x+b
