# Supplementary material for: A pore-size classification for peat bogs derived from unsaturated hydraulic properties
Source: Copernicus journal article supplement (doi:10.5194/hess-21-6185-2017), 2017-12-07
Supplement: Supplementary file 12 [file A321_4_HYDRUS.xlsx]

## Sheet: Gewicht
Datum / Zeit	Brutto-Gewicht [g]	Netto-Gewicht [g]	Gewichtsänderung [g]	Zeit [d]	Theta [-]	Verdunstungsrate [cm/d]		Volumen	228
2012-12-08 17:54:17	602.91	231.21	0					Höhe	5
2012-12-09 11:52:27	587.94	216.24	-14.97	0.748727	0.909386	0.438464		A	45.6
2012-12-09 19:46:29	581.85	210.15	-21.06	1.07792	0.882675	0.405701		Theta0	0.975044
2012-12-10 09:23:23	572.05	200.35	-30.86	1.64521	0.839693	0.378839		Trockengewicht	8.9
2012-12-10 23:03:00	562.88	191.18	-40.03	2.21439	0.799474	0.35331		Ks (as in Ksat)
2012-12-11 11:58:00	554.68	182.98	-48.23	2.75258	0.763509	0.334126		delta System [g]	371.7
2012-12-11 17:26:38	551.24	179.54	-51.67	2.9808	0.748421	0.330556
2012-12-12 09:20:03	540.87	169.17	-62.04	3.64289	0.702939	0.343474
2012-12-12 17:20:00	535.98	164.28	-66.93	3.97619	0.681491	0.321744
2012-12-13 09:52:19	526.14	154.44	-76.77	4.6653	0.638333	0.313143
2012-12-13 21:56:00	518.72	147.02	-84.19	5.16786	0.605789	0.323782
2012-12-14 09:20:00	511.83	140.13	-91.08	5.64286	0.57557	0.318098
2012-12-14 20:05:00	505.09	133.39	-97.82	6.09078	0.546009	0.329988
2012-12-15 11:42:00	496.56	124.86	-106.35	6.74147	0.508596	0.28748
2012-12-16 14:35:00	482.72	111.02	-120.19	7.86161	0.447895	0.270956
2012-12-17 08:59:00	473.26	101.56	-129.65	8.62828	0.406404	0.270595
2012-12-18 08:16:00	460.81	89.11	-142.1	9.59841	0.351798	0.28143
2012-12-18 16:30:00	456.89	85.19	-146.02	9.94147	0.334605	0.250586
2012-12-19 08:05:00	449.21	77.51	-153.7	10.5908	0.300921	0.259386
2012-12-19 16:44:00	444.89	73.19	-158.02	10.9512	0.281974	0.262854
2012-12-20 08:20:03	437.08	65.38	-165.83	11.6012	0.247719	0.263481
2012-12-20 17:25:00	432.67	60.97	-170.24	11.9797	0.228377	0.255552
2012-12-21 08:17:00	426.49	54.79	-176.42	12.5991	0.201272	0.218787
2012-12-21 18:25:00	422.72	51.02	-180.19	13.0213	0.184737	0.19581
2012-12-22 09:45:00	417.36	45.66	-185.55	13.6602	0.161228	0.183982
2012-12-22 19:15:54	414.41	42.71	-188.5	14.0567	0.148289	0.163177
2012-12-23 08:45:00	410.53	38.83	-192.38	14.6186	0.131272	0.151435
2012-12-25 11:41:00	399.3	27.6	-203.61	16.7408	0.0820175	0.116044
2012-12-26 14:35:00	394.75	23.05	-208.16	17.8616	0.0620614	0.0890237
2012-12-27 12:00:00	391.64	19.94	-211.27	18.754	0.0484211	0.0764284
2012-12-27 18:05:00	390.79	19.09	-212.12	19.0074	0.044693	0.07354
2012-12-28 09:40:00	388.72	17.02	-214.19	19.6567	0.035614	0.0699127
2012-12-29 09:41:00	385.85	14.15	-217.06	20.6574	0.0230263	0.0628949

## Sheet: Tensionen
Datum / Zeit	Tension unten [hPa]	Tension oben [hPa]	Zeit [d]	MP bot(2) [cm]	MP top(1) [cm]		WÄGUNG START
2012-12-10 16:09:40	5.51	8.03	1.92735	-5.61672	-8.18552	2012-12-10 16:09:40	41251.7	-8.3792
2012-12-10 16:10:40	5.52	8.02	1.92804	-5.62691	-8.17533		2012-12-08 17:54:17
2012-12-10 16:11:40	5.53	8.06	1.92874	-5.6371	-8.21611
2012-12-10 16:12:40	5.54	8.08	1.92943	-5.6473	-8.23649
2012-12-10 16:13:40	5.56	8.07	1.93013	-5.66769	-8.2263
2012-12-10 16:14:40	5.57	8.11	1.93082	-5.67788	-8.26707
2012-12-10 16:15:40	5.57	8.08	1.93152	-5.67788	-8.23649
2012-12-10 16:16:40	5.6	8.12	1.93221	-5.70846	-8.27727
2012-12-10 16:17:40	5.6	8.13	1.93291	-5.70846	-8.28746
2012-12-10 16:18:40	5.61	8.13	1.9336	-5.71865	-8.28746
2012-12-10 16:19:40	5.63	8.16	1.93429	-5.73904	-8.31804	2012-12-10 16:19:40
2012-12-10 16:20:40	5.61	8.14	1.93499	-5.71865	-8.29766
2012-12-10 16:21:40	5.63	8.15	1.93568	-5.73904	-8.30785
2012-12-10 16:22:40	5.64	8.15	1.93638	-5.74924	-8.30785
2012-12-10 16:23:40	5.66	8.18	1.93707	-5.76962	-8.33843
2012-12-10 16:24:40	5.68	8.19	1.93777	-5.79001	-8.34862
2012-12-10 16:25:40	5.66	8.18	1.93846	-5.76962	-8.33843
2012-12-10 16:26:40	5.68	8.2	1.93916	-5.79001	-8.35882
2012-12-10 16:27:40	5.69	8.2	1.93985	-5.8002	-8.35882
2012-12-10 16:28:40	5.68	8.2	1.94054	-5.79001	-8.35882
2012-12-10 16:29:40	5.7	8.22	1.94124	-5.8104	-8.3792	2012-12-10 16:29:40
2012-12-10 16:30:40	5.71	8.24	1.94193	-5.82059	-8.39959
2012-12-10 16:31:40	5.73	8.26	1.94263	-5.84098	-8.41998
2012-12-10 16:32:40	5.72	8.23	1.94332	-5.83078	-8.3894
2012-12-10 16:33:40	5.72	8.22	1.94402	-5.83078	-8.3792
2012-12-10 16:34:40	5.7	8.23	1.94471	-5.8104	-8.3894
2012-12-10 16:35:40	5.77	8.28	1.94541	-5.88175	-8.44037
2012-12-10 16:36:40	5.71	8.24	1.9461	-5.82059	-8.39959
2012-12-10 16:37:40	5.76	8.27	1.94679	-5.87156	-8.43017
2012-12-10 16:38:40	5.75	8.27	1.94749	-5.86137	-8.43017
2012-12-10 16:39:40	5.76	8.27	1.94818	-5.87156	-8.43017	2012-12-10 16:39:40
2012-12-10 16:40:40	5.77	8.29	1.94888	-5.88175	-8.45056
2012-12-10 16:41:40	5.77	8.26	1.94957	-5.88175	-8.41998
2012-12-10 16:42:40	5.79	8.31	1.95027	-5.90214	-8.47095
2012-12-10 16:43:40	5.8	8.27	1.95096	-5.91233	-8.43017
2012-12-10 16:44:40	5.81	8.33	1.95166	-5.92253	-8.49134
2012-12-10 16:45:40	5.8	8.33	1.95235	-5.91233	-8.49134
2012-12-10 16:46:40	5.82	8.33	1.95304	-5.93272	-8.49134
2012-12-10 16:47:40	5.8	8.31	1.95374	-5.91233	-8.47095
2012-12-10 16:48:40	5.81	8.33	1.95443	-5.92253	-8.49134
2012-12-10 16:49:40	5.82	8.34	1.95513	-5.93272	-8.50153	2012-12-10 16:49:40
2012-12-10 16:50:40	5.81	8.33	1.95582	-5.92253	-8.49134
2012-12-10 16:51:40	5.84	8.36	1.95652	-5.95311	-8.52192
2012-12-10 16:52:40	5.84	8.35	1.95721	-5.95311	-8.51172
2012-12-10 16:53:40	5.84	8.36	1.95791	-5.95311	-8.52192
2012-12-10 16:54:40	5.84	8.36	1.9586	-5.95311	-8.52192
2012-12-10 16:55:40	5.85	8.36	1.95929	-5.9633	-8.52192
2012-12-10 16:56:40	5.89	8.38	1.95999	-6.00408	-8.5423
2012-12-10 16:57:40	5.87	8.38	1.96068	-5.98369	-8.5423
2012-12-10 16:58:40	5.87	8.39	1.96138	-5.98369	-8.5525
2012-12-10 16:59:40	5.88	8.39	1.96207	-5.99388	-8.5525	2012-12-10 16:59:40
2012-12-10 17:00:40	5.89	8.39	1.96277	-6.00408	-8.5525
2012-12-10 17:01:40	5.88	8.4	1.96346	-5.99388	-8.56269
2012-12-10 17:02:40	5.87	8.4	1.96416	-5.98369	-8.56269
2012-12-10 17:03:40	5.91	8.43	1.96485	-6.02446	-8.59327
2012-12-10 17:04:40	5.89	8.39	1.96554	-6.00408	-8.5525
2012-12-10 17:05:40	5.92	8.43	1.96624	-6.03466	-8.59327
2012-12-10 17:06:40	5.93	8.45	1.96693	-6.04485	-8.61366
2012-12-10 17:07:40	5.93	8.44	1.96763	-6.04485	-8.60347
2012-12-10 17:08:40	5.94	8.46	1.96832	-6.05505	-8.62385
2012-12-10 17:09:40	5.93	8.43	1.96902	-6.04485	-8.59327	2012-12-10 17:09:40
2012-12-10 17:19:40	5.98	8.49	1.97596	-6.09582	-8.65443
2012-12-10 17:29:40	6.03	8.54	1.98291	-6.14679	-8.7054
2012-12-10 17:39:40	6.09	8.61	1.98985	-6.20795	-8.77676
2012-12-10 17:49:40	6.16	8.67	1.99679	-6.27931	-8.83792
2012-12-10 17:59:40	6.19	8.71	2.00374	-6.30989	-8.8787
2012-12-10 18:09:40	6.26	8.77	2.01068	-6.38124	-8.93986	2012-12-10 18:09:40
2012-12-10 18:19:40	6.25	8.76	2.01763	-6.37105	-8.92966
2012-12-10 18:29:40	6.16	8.67	2.02457	-6.27931	-8.83792
2012-12-10 18:39:40	6.27	8.79	2.03152	-6.39144	-8.96024
2012-12-10 18:49:40	6.32	8.84	2.03846	-6.44241	-9.01121
2012-12-10 18:59:40	6.35	8.87	2.04541	-6.47299	-9.04179
2012-12-10 19:09:40	6.4	8.92	2.05235	-6.52396	-9.09276	2012-12-10 19:09:40
2012-12-10 19:19:40	6.43	8.96	2.05929	-6.55454	-9.13354
2012-12-10 19:29:40	6.46	8.98	2.06624	-6.58512	-9.15392
2012-12-10 19:39:40	6.51	9.03	2.07318	-6.63609	-9.20489
2012-12-10 19:49:40	6.55	9.07	2.08013	-6.67686	-9.24567
2012-12-10 19:59:40	6.61	9.14	2.08707	-6.73802	-9.31702
2012-12-10 20:09:40	6.63	9.15	2.09402	-6.75841	-9.32722	2012-12-10 20:09:40
2012-12-10 20:19:40	6.66	9.19	2.10096	-6.78899	-9.36799
2012-12-10 20:29:40	6.7	9.22	2.10791	-6.82977	-9.39857
2012-12-10 20:39:40	6.71	9.23	2.11485	-6.83996	-9.40877
2012-12-10 20:49:40	6.74	9.27	2.12179	-6.87054	-9.44954
2012-12-10 20:59:40	6.76	9.3	2.12874	-6.89093	-9.48012
2012-12-10 21:09:40	6.82	9.35	2.13568	-6.95209	-9.53109	2012-12-10 21:09:40
2012-12-10 21:19:40	6.86	9.39	2.14263	-6.99286	-9.57187
2012-12-10 21:29:40	6.89	9.44	2.14957	-7.02345	-9.62283
2012-12-10 21:39:40	6.93	9.45	2.15652	-7.06422	-9.63303
2012-12-10 21:49:40	6.96	9.5	2.16346	-7.0948	-9.684
2012-12-10 21:59:40	7	9.54	2.17041	-7.13558	-9.72477
2012-12-10 22:09:40	7.03	9.57	2.17735	-7.16616	-9.75535	2012-12-10 22:09:40
2012-12-10 22:19:40	7.06	9.6	2.18429	-7.19674	-9.78593
2012-12-10 22:29:40	7.1	9.64	2.19124	-7.23751	-9.82671
2012-12-10 22:39:40	7.15	9.67	2.19818	-7.28848	-9.85729
2012-12-10 22:49:40	7.16	9.7	2.20513	-7.29867	-9.88787
2012-12-10 22:59:40	7.31	9.83	2.21207	-7.45158	-10.0204
2012-12-10 23:09:40	7.11	9.62	2.21902	-7.24771	-9.80632	2012-12-10 23:09:40
2012-12-10 23:19:40	7.18	9.71	2.22596	-7.31906	-9.89806
2012-12-10 23:29:40	7.26	9.78	2.23291	-7.40061	-9.96942
2012-12-10 23:39:40	7.32	9.84	2.23985	-7.46177	-10.0306
2012-12-10 23:49:40	7.37	9.88	2.24679	-7.51274	-10.0714
2012-12-10 23:59:40	7.38	9.91	2.25374	-7.52294	-10.1019
2012-12-11 00:09:40	7.38	9.9	2.26068	-7.52294	-10.0917	2012-12-11 00:09:40
2012-12-11 00:19:40	7.43	9.95	2.26763	-7.5739	-10.1427
2012-12-11 00:29:40	7.48	10	2.27457	-7.62487	-10.1937
2012-12-11 00:39:40	7.52	10.04	2.28152	-7.66565	-10.2345
2012-12-11 00:49:40	7.55	10.06	2.28846	-7.69623	-10.2548
2012-12-11 00:59:40	7.58	10.1	2.29541	-7.72681	-10.2956
2012-12-11 01:09:40	7.6	10.12	2.30235	-7.7472	-10.316	2012-12-11 01:09:40
2012-12-11 01:19:40	7.65	10.18	2.30929	-7.79817	-10.3772
2012-12-11 01:29:40	7.66	10.18	2.31624	-7.80836	-10.3772
2012-12-11 01:39:40	7.72	10.22	2.32318	-7.86952	-10.4179
2012-12-11 01:49:40	7.72	10.23	2.33013	-7.86952	-10.4281
2012-12-11 01:59:40	7.76	10.27	2.33707	-7.9103	-10.4689
2012-12-11 02:09:40	7.79	10.3	2.34402	-7.94088	-10.4995	2012-12-11 02:09:40
2012-12-11 02:19:40	7.81	10.31	2.35096	-7.96126	-10.5097
2012-12-11 02:29:40	7.85	10.35	2.35791	-8.00204	-10.5505
2012-12-11 02:39:40	7.87	10.37	2.36485	-8.02243	-10.5708
2012-12-11 02:49:40	7.91	10.41	2.37179	-8.0632	-10.6116
2012-12-11 02:59:40	7.94	10.43	2.37874	-8.09378	-10.632
2012-12-11 03:09:40	7.98	10.47	2.38568	-8.13456	-10.6728	2012-12-11 03:09:40
2012-12-11 03:19:40	8.01	10.5	2.39263	-8.16514	-10.7034
2012-12-11 03:29:40	8.05	10.54	2.39957	-8.20591	-10.7441
2012-12-11 03:39:40	8.03	10.52	2.40652	-8.18552	-10.7238
2012-12-11 03:49:40	8.08	10.56	2.41346	-8.23649	-10.7645
2012-12-11 03:59:40	8.13	10.61	2.42041	-8.28746	-10.8155
2012-12-11 04:09:40	8.18	10.65	2.42735	-8.33843	-10.8563	2012-12-11 04:09:40
2012-12-11 04:19:40	8.2	10.68	2.43429	-8.35882	-10.8869
2012-12-11 04:29:40	8.22	10.71	2.44124	-8.3792	-10.9174
2012-12-11 04:39:40	8.27	10.75	2.44818	-8.43017	-10.9582
2012-12-11 04:49:40	8.26	10.73	2.45513	-8.41998	-10.9378
2012-12-11 04:59:40	8.3	10.79	2.46207	-8.46075	-10.999
2012-12-11 05:09:40	8.34	10.8	2.46902	-8.50153	-11.0092	2012-12-11 05:09:40
2012-12-11 05:19:40	8.24	10.7	2.47596	-8.39959	-10.9072
2012-12-11 05:29:40	8.32	10.81	2.48291	-8.48114	-11.0194
2012-12-11 05:39:40	8.39	10.85	2.48985	-8.5525	-11.0601
2012-12-11 05:49:40	8.42	10.88	2.49679	-8.58308	-11.0907
2012-12-11 05:59:40	8.46	10.92	2.50374	-8.62385	-11.1315
2012-12-11 06:09:40	8.5	10.95	2.51068	-8.66463	-11.1621	2012-12-11 06:09:40
2012-12-11 06:19:40	8.5	10.94	2.51763	-8.66463	-11.1519
2012-12-11 06:29:40	8.55	10.98	2.52457	-8.7156	-11.1927
2012-12-11 06:39:40	8.57	11.02	2.53152	-8.73598	-11.2334
2012-12-11 06:49:40	8.6	11.05	2.53846	-8.76656	-11.264
2012-12-11 06:59:40	8.63	11.07	2.54541	-8.79715	-11.2844
2012-12-11 07:09:40	8.64	11.08	2.55235	-8.80734	-11.2946	2012-12-11 07:09:40
2012-12-11 07:19:40	8.68	11.1	2.55929	-8.84811	-11.315
2012-12-11 07:29:40	8.68	11.12	2.56624	-8.84811	-11.3354
2012-12-11 07:39:40	8.75	11.16	2.57318	-8.91947	-11.3761
2012-12-11 07:49:40	8.75	11.18	2.58013	-8.91947	-11.3965
2012-12-11 07:59:40	8.79	11.2	2.58707	-8.96024	-11.4169
2012-12-11 08:09:40	8.8	11.22	2.59402	-8.97044	-11.4373	2012-12-11 08:09:40
2012-12-11 08:19:40	8.82	11.25	2.60096	-8.99083	-11.4679
2012-12-11 08:29:40	8.85	11.29	2.60791	-9.02141	-11.5087
2012-12-11 08:39:40	8.88	11.32	2.61485	-9.05199	-11.5392
2012-12-11 08:49:40	8.91	11.32	2.62179	-9.08257	-11.5392
2012-12-11 08:59:40	8.94	11.4	2.62874	-9.11315	-11.6208
2012-12-11 09:09:40	8.96	11.4	2.63568	-9.13354	-11.6208	2012-12-11 09:09:40
2012-12-11 09:19:40	9.01	11.43	2.64263	-9.18451	-11.6514
2012-12-11 09:29:40	9.04	11.46	2.64957	-9.21509	-11.682
2012-12-11 09:39:40	9.09	11.52	2.65652	-9.26606	-11.7431
2012-12-11 09:49:40	9.02	11.45	2.66346	-9.1947	-11.6718
2012-12-11 09:59:40	9.1	11.51	2.67041	-9.27625	-11.7329
2012-12-11 10:09:40	9.12	11.55	2.67735	-9.29664	-11.7737	2012-12-11 10:09:40
2012-12-11 10:19:40	9.14	11.57	2.68429	-9.31702	-11.7941
2012-12-11 10:29:40	9.2	11.61	2.69124	-9.37819	-11.8349
2012-12-11 10:39:40	9.22	11.63	2.69818	-9.39857	-11.8552
2012-12-11 10:49:40	9.23	11.64	2.70513	-9.40877	-11.8654
2012-12-11 10:59:40	9.27	11.64	2.71207	-9.44954	-11.8654
2012-12-11 11:09:40	9.28	11.69	2.71902	-9.45973	-11.9164	2012-12-11 11:09:40
2012-12-11 11:19:40	9.32	11.73	2.72596	-9.50051	-11.9572
2012-12-11 11:29:40	9.35	11.75	2.73291	-9.53109	-11.9776
2012-12-11 11:39:40	9.39	11.8	2.73985	-9.57187	-12.0285
2012-12-11 11:49:40	9.42	11.82	2.74679	-9.60245	-12.0489
2012-12-11 11:57:20	9.45	11.86	2.75212	-9.63303	-12.0897
2012-12-11 11:58:20	9.47	11.87	2.75281	-9.65341	-12.0999	2012-12-11 11:58:20
2012-12-11 11:59:20	9.44	11.85	2.75351	-9.62283	-12.0795
2012-12-11 12:00:20	9.45	11.86	2.7542	-9.63303	-12.0897
2012-12-11 12:02:20	9.18	11.56	2.75559	-9.3578	-11.7839
2012-12-11 12:03:20	9.13	11.51	2.75628	-9.30683	-11.7329
2012-12-11 12:04:20	9.14	11.55	2.75698	-9.31702	-11.7737
2012-12-11 12:05:20	9.15	11.54	2.75767	-9.32722	-11.7635	2012-12-11 12:05:20
2012-12-11 12:06:20	9.2	11.58	2.75837	-9.37819	-11.8043
2012-12-11 12:07:20	9.22	11.61	2.75906	-9.39857	-11.8349
2012-12-11 12:08:20	9.21	11.62	2.75976	-9.38838	-11.8451
2012-12-11 12:09:20	9.27	11.63	2.76045	-9.44954	-11.8552
2012-12-11 12:10:20	9.26	11.65	2.76115	-9.43935	-11.8756
2012-12-11 12:11:20	9.18	11.66	2.76184	-9.3578	-11.8858	2012-12-11 12:11:20
2012-12-11 12:12:20	9.29	11.69	2.76253	-9.46993	-11.9164
2012-12-11 12:13:20	9.3	11.68	2.76323	-9.48012	-11.9062
2012-12-11 12:14:20	9.31	11.71	2.76392	-9.49032	-11.9368
2012-12-11 12:15:20	9.35	11.71	2.76462	-9.53109	-11.9368
2012-12-11 12:16:20	9.34	11.72	2.76531	-9.5209	-11.947
2012-12-11 12:17:20	9.33	11.72	2.76601	-9.5107	-11.947	2012-12-11 12:17:20
2012-12-11 12:18:20	9.36	11.74	2.7667	-9.54128	-11.9674
2012-12-11 12:19:20	9.35	11.74	2.7674	-9.53109	-11.9674
2012-12-11 12:20:20	9.36	11.75	2.76809	-9.54128	-11.9776
2012-12-11 12:21:20	9.41	11.8	2.76878	-9.59225	-12.0285
2012-12-11 12:22:20	9.41	11.82	2.76948	-9.59225	-12.0489
2012-12-11 12:23:20	9.42	11.81	2.77017	-9.60245	-12.0387	2012-12-11 12:23:20
2012-12-11 12:24:20	9.41	11.79	2.77087	-9.59225	-12.0183
2012-12-11 12:25:20	9.45	11.81	2.77156	-9.63303	-12.0387
2012-12-11 12:26:20	9.44	11.82	2.77226	-9.62283	-12.0489
2012-12-11 12:27:20	9.44	11.84	2.77295	-9.62283	-12.0693
2012-12-11 12:28:20	9.44	11.84	2.77365	-9.62283	-12.0693
2012-12-11 12:29:20	9.48	11.86	2.77434	-9.66361	-12.0897	2012-12-11 12:29:20
2012-12-11 12:30:20	9.47	11.85	2.77503	-9.65341	-12.0795
2012-12-11 12:31:20	9.45	11.84	2.77573	-9.63303	-12.0693
2012-12-11 12:32:20	9.47	11.85	2.77642	-9.65341	-12.0795
2012-12-11 12:33:20	9.48	11.86	2.77712	-9.66361	-12.0897
2012-12-11 12:34:20	9.46	11.87	2.77781	-9.64322	-12.0999
2012-12-11 12:35:20	9.44	11.82	2.77851	-9.62283	-12.0489	2012-12-11 12:35:20
2012-12-11 12:36:20	9.47	11.88	2.7792	-9.65341	-12.1101
2012-12-11 12:37:20	9.43	11.88	2.7799	-9.61264	-12.1101
2012-12-11 12:38:20	9.51	11.9	2.78059	-9.69419	-12.1305
2012-12-11 12:39:20	9.49	11.89	2.78128	-9.6738	-12.1203
2012-12-11 12:40:20	9.46	11.85	2.78198	-9.64322	-12.0795
2012-12-11 12:41:20	9.5	11.88	2.78267	-9.684	-12.1101	2012-12-11 12:41:20
2012-12-11 12:42:20	9.5	11.89	2.78337	-9.684	-12.1203
2012-12-11 12:43:20	9.5	11.9	2.78406	-9.684	-12.1305
2012-12-11 12:44:20	9.52	11.91	2.78476	-9.70438	-12.1407
2012-12-11 12:45:20	9.5	11.91	2.78545	-9.684	-12.1407
2012-12-11 12:46:20	9.53	11.92	2.78615	-9.71458	-12.1509
2012-12-11 12:47:20	9.53	11.92	2.78684	-9.71458	-12.1509	2012-12-11 12:47:20
2012-12-11 12:48:20	9.49	11.89	2.78753	-9.6738	-12.1203
2012-12-11 12:49:20	9.51	11.89	2.78823	-9.69419	-12.1203
2012-12-11 12:50:20	9.53	11.93	2.78892	-9.71458	-12.1611
2012-12-11 12:51:20	9.54	11.92	2.78962	-9.72477	-12.1509
2012-12-11 12:52:20	9.51	11.92	2.79031	-9.69419	-12.1509
2012-12-11 12:53:20	9.52	11.92	2.79101	-9.70438	-12.1509	2012-12-11 12:53:20
2012-12-11 12:54:20	9.53	11.92	2.7917	-9.71458	-12.1509
2012-12-11 12:55:20	9.54	11.92	2.7924	-9.72477	-12.1509
2012-12-11 12:56:20	9.54	11.96	2.79309	-9.72477	-12.1916
2012-12-11 12:57:20	9.55	11.94	2.79378	-9.73496	-12.1713
2012-12-11 13:07:20	9.58	11.96	2.80073	-9.76555	-12.1916
2012-12-11 13:17:20	9.6	11.98	2.80767	-9.78593	-12.212	2012-12-11 13:17:20
2012-12-11 13:27:20	9.63	12.01	2.81462	-9.81651	-12.2426
2012-12-11 13:37:20	9.67	12.04	2.82156	-9.85729	-12.2732
2012-12-11 13:47:20	9.71	12.09	2.82851	-9.89806	-12.3242
2012-12-11 13:57:20	9.73	12.13	2.83545	-9.91845	-12.3649
2012-12-11 14:07:20	9.76	12.14	2.8424	-9.94903	-12.3751
2012-12-11 14:17:20	9.79	12.18	2.84934	-9.97961	-12.4159	2012-12-11 14:17:20
2012-12-11 14:27:20	9.84	12.21	2.85628	-10.0306	-12.4465
2012-12-11 14:37:20	9.86	12.24	2.86323	-10.051	-12.4771
2012-12-11 14:47:20	9.88	12.28	2.87017	-10.0714	-12.5178
2012-12-11 14:57:20	9.94	12.3	2.87712	-10.1325	-12.5382
2012-12-11 15:07:20	9.94	12.31	2.88406	-10.1325	-12.5484
2012-12-11 15:17:20	9.98	12.34	2.89101	-10.1733	-12.579	2012-12-11 15:17:20
2012-12-11 15:27:20	10.01	12.37	2.89795	-10.2039	-12.6096
2012-12-11 15:37:20	10.04	12.41	2.9049	-10.2345	-12.6504
2012-12-11 15:47:20	10.08	12.44	2.91184	-10.2752	-12.6809
2012-12-11 15:57:20	10.1	12.46	2.91878	-10.2956	-12.7013
2012-12-11 16:07:20	10.12	12.48	2.92573	-10.316	-12.7217
2012-12-11 16:17:20	10.15	12.51	2.93267	-10.3466	-12.7523	2012-12-11 16:17:20
2012-12-11 16:27:20	10.17	12.52	2.93962	-10.367	-12.7625
2012-12-11 16:37:20	10.21	12.58	2.94656	-10.4077	-12.8236
2012-12-11 16:47:20	10.22	12.58	2.95351	-10.4179	-12.8236
2012-12-11 16:57:20	10.22	12.58	2.96045	-10.4179	-12.8236
2012-12-11 17:07:20	10.26	12.62	2.9674	-10.4587	-12.8644
2012-12-11 17:17:20	10.25	12.62	2.97434	-10.4485	-12.8644	2012-12-11 17:17:20
2012-12-11 17:27:20	10.46	12.82	2.98128	-10.6626	-13.0683
2012-12-11 17:37:20	10.29	12.65	2.98823	-10.4893	-12.895
2012-12-11 17:47:20	10.34	12.7	2.99517	-10.5403	-12.946
2012-12-11 17:57:20	9.69	12.05	3.00212	-9.87768	-12.2834
2012-12-11 18:07:20	9.74	12.12	3.00906	-9.92864	-12.3547
2012-12-11 18:17:20	9.91	12.26	3.01601	-10.1019	-12.4975	2012-12-11 18:17:20
2012-12-11 18:27:20	10.05	12.41	3.02295	-10.2446	-12.6504
2012-12-11 18:37:20	10.17	12.52	3.0299	-10.367	-12.7625
2012-12-11 18:47:20	10.27	12.6	3.03684	-10.4689	-12.844
2012-12-11 18:57:20	10.33	12.65	3.04378	-10.5301	-12.895
2012-12-11 19:07:20	10.37	12.69	3.05073	-10.5708	-12.9358
2012-12-11 19:17:20	10.41	12.73	3.05767	-10.6116	-12.9766	2012-12-11 19:17:20
2012-12-11 19:27:20	10.44	12.75	3.06462	-10.6422	-12.9969
2012-12-11 19:37:20	10.47	12.78	3.07156	-10.6728	-13.0275
2012-12-11 19:47:20	10.5	12.81	3.07851	-10.7034	-13.0581
2012-12-11 19:57:20	10.53	12.85	3.08545	-10.7339	-13.0989
2012-12-11 20:07:20	10.57	12.89	3.0924	-10.7747	-13.1397
2012-12-11 20:17:20	10.52	12.83	3.09934	-10.7238	-13.0785	2012-12-11 20:17:20
2012-12-11 20:27:20	10.61	12.91	3.10628	-10.8155	-13.16
2012-12-11 20:37:20	10.65	12.96	3.11323	-10.8563	-13.211
2012-12-11 20:47:20	10.69	13	3.12017	-10.897	-13.2518
2012-12-11 20:57:20	10.68	13	3.12712	-10.8869	-13.2518
2012-12-11 21:07:20	10.73	13.05	3.13406	-10.9378	-13.3028
2012-12-11 21:17:20	10.77	13.08	3.14101	-10.9786	-13.3333	2012-12-11 21:17:20
2012-12-11 21:27:20	10.8	13.11	3.14795	-11.0092	-13.3639
2012-12-11 21:37:20	10.84	13.15	3.1549	-11.0499	-13.4047
2012-12-11 21:47:20	10.84	13.14	3.16184	-11.0499	-13.3945
2012-12-11 21:57:20	10.89	13.19	3.16878	-11.1009	-13.4455
2012-12-11 22:07:20	10.9	13.22	3.17573	-11.1111	-13.476
2012-12-11 22:17:20	10.94	13.24	3.18267	-11.1519	-13.4964	2012-12-11 22:17:20
2012-12-11 22:27:20	10.91	13.25	3.18962	-11.1213	-13.5066
2012-12-11 22:37:20	11	13.31	3.19656	-11.213	-13.5678
2012-12-11 22:47:20	11.03	13.34	3.20351	-11.2436	-13.5984
2012-12-11 22:57:20	11.06	13.36	3.21045	-11.2742	-13.6188
2012-12-11 23:07:20	11.09	13.4	3.2174	-11.3048	-13.6595
2012-12-11 23:17:20	11.13	13.43	3.22434	-11.3456	-13.6901	2012-12-11 23:17:20
2012-12-11 23:27:20	11.16	13.47	3.23128	-11.3761	-13.7309
2012-12-11 23:37:20	11.2	13.5	3.23823	-11.4169	-13.7615
2012-12-11 23:47:20	11.23	13.53	3.24517	-11.4475	-13.792
2012-12-11 23:57:20	11.24	13.55	3.25212	-11.4577	-13.8124
2012-12-12 00:07:20	11.24	13.55	3.25906	-11.4577	-13.8124
2012-12-12 00:17:20	11.3	13.6	3.26601	-11.5189	-13.8634	2012-12-12 00:17:20
2012-12-12 00:27:20	11.32	13.63	3.27295	-11.5392	-13.894
2012-12-12 00:37:20	11.32	13.63	3.2799	-11.5392	-13.894
2012-12-12 00:47:20	11.35	13.67	3.28684	-11.5698	-13.9348
2012-12-12 00:57:20	11.35	13.66	3.29378	-11.5698	-13.9246
2012-12-12 01:07:20	11.4	13.71	3.30073	-11.6208	-13.9755
2012-12-12 01:17:20	11.42	13.73	3.30767	-11.6412	-13.9959	2012-12-12 01:17:20
2012-12-12 01:27:20	11.45	13.75	3.31462	-11.6718	-14.0163
2012-12-12 01:37:20	11.48	13.78	3.32156	-11.7023	-14.0469
2012-12-12 01:47:20	11.53	13.82	3.32851	-11.7533	-14.0877
2012-12-12 01:57:20	11.55	13.86	3.33545	-11.7737	-14.1284
2012-12-12 02:07:20	11.58	13.89	3.3424	-11.8043	-14.159
2012-12-12 02:17:20	11.62	13.91	3.34934	-11.8451	-14.1794	2012-12-12 02:17:20
2012-12-12 02:27:20	11.57	13.85	3.35628	-11.7941	-14.1182
2012-12-12 02:37:20	11.63	13.94	3.36323	-11.8552	-14.21
2012-12-12 02:47:20	11.66	13.97	3.37017	-11.8858	-14.2406
2012-12-12 02:57:20	11.69	13.99	3.37712	-11.9164	-14.261
2012-12-12 03:07:20	11.73	14.02	3.38406	-11.9572	-14.2915
2012-12-12 03:17:20	11.74	14.04	3.39101	-11.9674	-14.3119	2012-12-12 03:17:20
2012-12-12 03:27:20	11.77	14.08	3.39795	-11.998	-14.3527
2012-12-12 03:37:20	11.8	14.1	3.4049	-12.0285	-14.3731
2012-12-12 03:47:20	11.84	14.14	3.41184	-12.0693	-14.4139
2012-12-12 03:57:20	11.87	14.17	3.41878	-12.0999	-14.4444
2012-12-12 04:07:20	11.89	14.2	3.42573	-12.1203	-14.475
2012-12-12 04:17:20	11.9	14.21	3.43267	-12.1305	-14.4852	2012-12-12 04:17:20
2012-12-12 04:27:20	11.94	14.24	3.43962	-12.1713	-14.5158
2012-12-12 04:37:20	11.97	14.26	3.44656	-12.2018	-14.5362
2012-12-12 04:47:20	12.01	14.3	3.45351	-12.2426	-14.577
2012-12-12 04:57:20	11.97	14.28	3.46045	-12.2018	-14.5566
2012-12-12 05:07:20	12.02	14.33	3.4674	-12.2528	-14.6075
2012-12-12 05:17:20	12.06	14.37	3.47434	-12.2936	-14.6483	2012-12-12 05:17:20
2012-12-12 05:27:20	12.1	14.4	3.48128	-12.3344	-14.6789
2012-12-12 05:37:20	12.12	14.43	3.48823	-12.3547	-14.7095
2012-12-12 05:47:20	12.16	14.45	3.49517	-12.3955	-14.7299
2012-12-12 05:57:20	12.19	14.49	3.50212	-12.4261	-14.7706
2012-12-12 06:07:20	12.2	14.5	3.50906	-12.4363	-14.7808
2012-12-12 06:17:20	12.23	14.54	3.51601	-12.4669	-14.8216	2012-12-12 06:17:20
2012-12-12 06:27:20	12.28	14.56	3.52295	-12.5178	-14.842
2012-12-12 06:37:20	12.29	14.58	3.5299	-12.528	-14.8624
2012-12-12 06:47:20	12.31	14.61	3.53684	-12.5484	-14.893
2012-12-12 06:57:20	12.35	14.64	3.54378	-12.5892	-14.9235
2012-12-12 07:07:20	12.37	14.66	3.55073	-12.6096	-14.9439
2012-12-12 07:17:20	12.39	14.69	3.55767	-12.63	-14.9745	2012-12-12 07:17:20
2012-12-12 07:27:20	12.42	14.72	3.56462	-12.6606	-15.0051
2012-12-12 07:37:20	12.44	14.75	3.57156	-12.6809	-15.0357
2012-12-12 07:47:20	12.45	14.75	3.57851	-12.6911	-15.0357
2012-12-12 07:57:20	12.49	14.78	3.58545	-12.7319	-15.0663
2012-12-12 08:07:20	12.3	14.59	3.5924	-12.5382	-14.8726
2012-12-12 08:17:20	12.46	14.74	3.59934	-12.7013	-15.0255	2012-12-12 08:17:20
2012-12-12 08:27:20	12.52	14.81	3.60628	-12.7625	-15.0968
2012-12-12 08:37:20	12.54	14.84	3.61323	-12.7829	-15.1274
2012-12-12 08:47:20	12.56	14.86	3.62017	-12.8033	-15.1478
2012-12-12 08:57:20	12.58	14.88	3.62712	-12.8236	-15.1682
2012-12-12 09:07:20	12.59	14.89	3.63406	-12.8338	-15.1784
2012-12-12 09:17:20	12.61	14.9	3.64101	-12.8542	-15.1886	2012-12-12 09:17:20
2012-12-12 09:27:20	12.56	14.86	3.64795	-12.8033	-15.1478
2012-12-12 09:37:20	12.63	14.94	3.6549	-12.8746	-15.2294
2012-12-12 09:47:20	12.68	14.97	3.66184	-12.9256	-15.2599
2012-12-12 09:57:20	12.71	15.01	3.66878	-12.9562	-15.3007
2012-12-12 10:07:20	12.72	15.03	3.67573	-12.9664	-15.3211
2012-12-12 10:17:20	12.76	15.06	3.68267	-13.0071	-15.3517	2012-12-12 10:17:20
2012-12-12 10:27:20	12.78	15.08	3.68962	-13.0275	-15.3721
2012-12-12 10:37:20	12.81	15.11	3.69656	-13.0581	-15.4027
2012-12-12 10:47:20	12.84	15.15	3.70351	-13.0887	-15.4434
2012-12-12 10:57:20	12.85	15.16	3.71045	-13.0989	-15.4536
2012-12-12 11:07:20	12.89	15.19	3.7174	-13.1397	-15.4842
2012-12-12 11:17:20	12.92	15.23	3.72434	-13.1702	-15.525	2012-12-12 11:17:20
2012-12-12 11:27:20	12.95	15.25	3.73128	-13.2008	-15.5454
2012-12-12 11:37:20	12.98	15.28	3.73823	-13.2314	-15.5759
2012-12-12 11:47:20	13	15.3	3.74517	-13.2518	-15.5963
2012-12-12 11:57:20	13.02	15.32	3.75212	-13.2722	-15.6167
2012-12-12 12:07:20	13.03	15.34	3.75906	-13.2824	-15.6371
2012-12-12 12:17:20	13.05	15.36	3.76601	-13.3028	-15.6575	2012-12-12 12:17:20
2012-12-12 12:27:20	13.08	15.38	3.77295	-13.3333	-15.6779
2012-12-12 12:37:20	13.11	15.39	3.7799	-13.3639	-15.6881
2012-12-12 12:47:20	13.14	15.43	3.78684	-13.3945	-15.7288
2012-12-12 12:57:20	13.15	15.45	3.79378	-13.4047	-15.7492
2012-12-12 13:07:20	13.16	15.46	3.80073	-13.4149	-15.7594
2012-12-12 13:17:20	13.19	15.49	3.80767	-13.4455	-15.79	2012-12-12 13:17:20
2012-12-12 13:27:20	13.2	15.5	3.81462	-13.4557	-15.8002
2012-12-12 13:37:20	13.22	15.53	3.82156	-13.476	-15.8308
2012-12-12 13:47:20	13.26	15.55	3.82851	-13.5168	-15.8512
2012-12-12 13:57:20	13.27	15.58	3.83545	-13.527	-15.8818
2012-12-12 14:07:20	13.3	15.6	3.8424	-13.5576	-15.9021
2012-12-12 14:17:20	13.34	15.61	3.84934	-13.5984	-15.9123	2012-12-12 14:17:20
2012-12-12 14:27:20	13.36	15.64	3.85628	-13.6188	-15.9429
2012-12-12 14:37:20	13.36	15.66	3.86323	-13.6188	-15.9633
2012-12-12 14:47:20	13.41	15.7	3.87017	-13.6697	-16.0041
2012-12-12 14:57:20	13.44	15.73	3.87712	-13.7003	-16.0347
2012-12-12 15:07:20	13.45	15.75	3.88406	-13.7105	-16.055
2012-12-12 15:17:20	13.48	15.77	3.89101	-13.7411	-16.0754	2012-12-12 15:17:20
2012-12-12 15:27:20	13.5	15.77	3.89795	-13.7615	-16.0754
2012-12-12 15:37:20	13.5	15.81	3.9049	-13.7615	-16.1162
2012-12-12 15:47:20	13.54	15.83	3.91184	-13.8022	-16.1366
2012-12-12 15:57:20	13.55	15.84	3.91878	-13.8124	-16.1468
2012-12-12 16:07:20	13.56	15.86	3.92573	-13.8226	-16.1672
2012-12-12 16:17:20	13.6	15.89	3.93267	-13.8634	-16.1978	2012-12-12 16:17:20
2012-12-12 16:27:20	13.63	15.93	3.93962	-13.894	-16.2385
2012-12-12 16:37:20	13.64	15.93	3.94656	-13.9042	-16.2385
2012-12-12 16:47:20	13.67	15.94	3.95351	-13.9348	-16.2487
2012-12-12 16:57:20	13.69	15.98	3.96045	-13.9551	-16.2895
2012-12-12 17:07:20	13.71	16	3.9674	-13.9755	-16.3099
2012-12-12 17:17:20	13.75	16.04	3.97434	-14.0163	-16.3507	2012-12-12 17:17:20
2012-12-12 17:27:20	13.63	15.91	3.98128	-13.894	-16.2181
2012-12-12 17:37:20	13.76	16.06	3.98823	-14.0265	-16.371
2012-12-12 17:47:20	13.81	16.09	3.99517	-14.0775	-16.4016
2012-12-12 17:57:20	13.84	16.12	4.00212	-14.1081	-16.4322
2012-12-12 18:07:20	13.86	16.16	4.00906	-14.1284	-16.473
2012-12-12 18:17:20	13.88	16.18	4.01601	-14.1488	-16.4934	2012-12-12 18:17:20
2012-12-12 18:27:20	13.93	16.21	4.02295	-14.1998	-16.524
2012-12-12 18:37:20	13.95	16.25	4.0299	-14.2202	-16.5647
2012-12-12 18:47:20	13.97	16.26	4.03684	-14.2406	-16.5749
2012-12-12 18:57:20	14	16.3	4.04378	-14.2712	-16.6157
2012-12-12 19:07:20	14.02	16.32	4.05073	-14.2915	-16.6361
2012-12-12 19:17:20	14.06	16.34	4.05767	-14.3323	-16.6565	2012-12-12 19:17:20
2012-12-12 19:27:20	14.08	16.37	4.06462	-14.3527	-16.6871
2012-12-12 19:37:20	14.1	16.4	4.07156	-14.3731	-16.7176
2012-12-12 19:47:20	14.12	16.42	4.07851	-14.3935	-16.738
2012-12-12 19:57:20	14.15	16.44	4.08545	-14.4241	-16.7584
2012-12-12 20:07:20	14.18	16.46	4.0924	-14.4546	-16.7788
2012-12-12 20:17:20	14.19	16.5	4.09934	-14.4648	-16.8196	2012-12-12 20:17:20
2012-12-12 20:27:20	14.22	16.52	4.10628	-14.4954	-16.84
2012-12-12 20:37:20	14.26	16.56	4.11323	-14.5362	-16.8807
2012-12-12 20:47:20	14.28	16.58	4.12017	-14.5566	-16.9011
2012-12-12 20:57:20	14.28	16.6	4.12712	-14.5566	-16.9215
2012-12-12 21:07:20	14.33	16.63	4.13406	-14.6075	-16.9521
2012-12-12 21:17:20	14.36	16.67	4.14101	-14.6381	-16.9929	2012-12-12 21:17:20
2012-12-12 21:27:20	14.38	16.68	4.14795	-14.6585	-17.0031
2012-12-12 21:37:20	14.39	16.71	4.1549	-14.6687	-17.0336
2012-12-12 21:47:20	14.43	16.74	4.16184	-14.7095	-17.0642
2012-12-12 21:57:20	14.43	16.76	4.16878	-14.7095	-17.0846
2012-12-12 22:07:20	14.46	16.78	4.17573	-14.7401	-17.105
2012-12-12 22:17:20	14.49	16.8	4.18267	-14.7706	-17.1254	2012-12-12 22:17:20
2012-12-12 22:27:20	14.5	16.83	4.18962	-14.7808	-17.156
2012-12-12 22:37:20	14.52	16.84	4.19656	-14.8012	-17.1662
2012-12-12 22:47:20	14.56	16.87	4.20351	-14.842	-17.1967
2012-12-12 22:57:20	14.59	16.91	4.21045	-14.8726	-17.2375
2012-12-12 23:07:20	14.61	16.93	4.2174	-14.893	-17.2579
2012-12-12 23:17:20	14.64	16.95	4.22434	-14.9235	-17.2783	2012-12-12 23:17:20
2012-12-12 23:27:20	14.67	16.99	4.23128	-14.9541	-17.3191
2012-12-12 23:37:20	14.7	17.01	4.23823	-14.9847	-17.3394
2012-12-12 23:47:20	14.71	17.03	4.24517	-14.9949	-17.3598
2012-12-12 23:57:20	14.73	17.05	4.25212	-15.0153	-17.3802
2012-12-13 00:07:20	14.77	17.08	4.25906	-15.0561	-17.4108
2012-12-13 00:17:20	14.79	17.11	4.26601	-15.0765	-17.4414	2012-12-13 00:17:20
2012-12-13 00:27:20	14.82	17.14	4.27295	-15.107	-17.472
2012-12-13 00:37:20	14.84	17.15	4.2799	-15.1274	-17.4822
2012-12-13 00:47:20	14.85	17.17	4.28684	-15.1376	-17.5025
2012-12-13 00:57:20	14.88	17.2	4.29378	-15.1682	-17.5331
2012-12-13 01:07:20	14.92	17.23	4.30073	-15.209	-17.5637
2012-12-13 01:17:20	14.92	17.25	4.30767	-15.209	-17.5841	2012-12-13 01:17:20
2012-12-13 01:27:20	14.95	17.28	4.31462	-15.2396	-17.6147
2012-12-13 01:37:20	14.98	17.3	4.32156	-15.2701	-17.6351
2012-12-13 01:47:20	15.01	17.34	4.32851	-15.3007	-17.6758
2012-12-13 01:57:20	15.03	17.36	4.33545	-15.3211	-17.6962
2012-12-13 02:07:20	15.07	17.39	4.3424	-15.3619	-17.7268
2012-12-13 02:17:20	15.09	17.41	4.34934	-15.3823	-17.7472	2012-12-13 02:17:20
2012-12-13 02:27:20	15.11	17.43	4.35628	-15.4027	-17.7676
2012-12-13 02:37:20	15.13	17.45	4.36323	-15.423	-17.788
2012-12-13 02:47:20	15.13	17.46	4.37017	-15.423	-17.7982
2012-12-13 02:57:20	15.16	17.48	4.37712	-15.4536	-17.8186
2012-12-13 03:07:20	15.19	17.51	4.38406	-15.4842	-17.8491
2012-12-13 03:17:20	15.21	17.54	4.39101	-15.5046	-17.8797	2012-12-13 03:17:20
2012-12-13 03:27:20	15.25	17.56	4.39795	-15.5454	-17.9001
2012-12-13 03:37:20	15.27	17.59	4.4049	-15.5657	-17.9307
2012-12-13 03:47:20	15.3	17.62	4.41184	-15.5963	-17.9613
2012-12-13 03:57:20	15.32	17.64	4.41878	-15.6167	-17.9817
2012-12-13 04:07:20	15.35	17.67	4.42573	-15.6473	-18.0122
2012-12-13 04:17:20	15.37	17.69	4.43267	-15.6677	-18.0326	2012-12-13 04:17:20
2012-12-13 04:27:20	15.39	17.72	4.43962	-15.6881	-18.0632
2012-12-13 04:37:20	15.41	17.72	4.44656	-15.7085	-18.0632
2012-12-13 04:47:20	15.44	17.77	4.45351	-15.739	-18.1142
2012-12-13 04:57:20	15.44	17.77	4.46045	-15.739	-18.1142
2012-12-13 05:07:20	15.46	17.79	4.4674	-15.7594	-18.1346
2012-12-13 05:17:20	15.5	17.83	4.47434	-15.8002	-18.1753	2012-12-13 05:17:20
2012-12-13 05:27:20	15.51	17.84	4.48128	-15.8104	-18.1855
2012-12-13 05:37:20	15.53	17.86	4.48823	-15.8308	-18.2059
2012-12-13 05:47:20	15.56	17.89	4.49517	-15.8614	-18.2365
2012-12-13 05:57:20	15.59	17.92	4.50212	-15.8919	-18.2671
2012-12-13 06:07:20	15.61	17.94	4.50906	-15.9123	-18.2875
2012-12-13 06:17:20	15.64	17.97	4.51601	-15.9429	-18.318	2012-12-13 06:17:20
2012-12-13 06:27:20	15.67	18	4.52295	-15.9735	-18.3486
2012-12-13 06:37:20	15.68	18.01	4.5299	-15.9837	-18.3588
2012-12-13 06:47:20	15.7	18.04	4.53684	-16.0041	-18.3894
2012-12-13 06:57:20	15.73	18.06	4.54378	-16.0347	-18.4098
2012-12-13 07:07:20	15.76	18.08	4.55073	-16.0652	-18.4302
2012-12-13 07:17:20	15.78	18.11	4.55767	-16.0856	-18.4608	2012-12-13 07:17:20
2012-12-13 07:27:20	15.81	18.13	4.56462	-16.1162	-18.4811
2012-12-13 07:37:20	15.8	18.15	4.57156	-16.106	-18.5015
2012-12-13 07:47:20	15.85	18.18	4.57851	-16.157	-18.5321
2012-12-13 07:57:20	15.9	18.21	4.58545	-16.208	-18.5627
2012-12-13 08:07:20	15.91	18.23	4.5924	-16.2181	-18.5831
2012-12-13 08:17:20	15.93	18.26	4.59934	-16.2385	-18.6137	2012-12-13 08:17:20
2012-12-13 08:27:20	15.96	18.3	4.60628	-16.2691	-18.6544
2012-12-13 08:37:20	16	18.32	4.61323	-16.3099	-18.6748
2012-12-13 08:47:20	16.02	18.34	4.62017	-16.3303	-18.6952
2012-12-13 08:57:20	16.04	18.36	4.62712	-16.3507	-18.7156
2012-12-13 09:07:20	16.05	18.39	4.63406	-16.3609	-18.7462
2012-12-13 09:17:20	16.08	18.41	4.64101	-16.3914	-18.7666	2012-12-13 09:17:20
2012-12-13 09:27:20	16.12	18.45	4.64795	-16.4322	-18.8073
2012-12-13 09:37:20	16.16	18.49	4.6549	-16.473	-18.8481
2012-12-13 09:47:20	16.17	18.5	4.66184	-16.4832	-18.8583
2012-12-13 09:57:20	16.12	18.43	4.66878	-16.4322	-18.787
2012-12-13 10:07:20	16.19	18.53	4.67573	-16.5036	-18.8889
2012-12-13 10:17:20	16.23	18.56	4.68267	-16.5443	-18.9195	2012-12-13 10:17:20
2012-12-13 10:27:20	16.25	18.59	4.68962	-16.5647	-18.9501
2012-12-13 10:37:20	16.28	18.62	4.69656	-16.5953	-18.9806
2012-12-13 10:47:20	16.31	18.66	4.70351	-16.6259	-19.0214
2012-12-13 10:57:20	16.35	18.7	4.71045	-16.6667	-19.0622
2012-12-13 11:07:20	16.37	18.71	4.7174	-16.6871	-19.0724
2012-12-13 11:17:20	16.39	18.75	4.72434	-16.7074	-19.1131	2012-12-13 11:17:20
2012-12-13 11:27:20	16.41	18.76	4.73128	-16.7278	-19.1233
2012-12-13 11:37:20	16.43	18.79	4.73823	-16.7482	-19.1539
2012-12-13 11:47:20	16.46	18.81	4.74517	-16.7788	-19.1743
2012-12-13 11:57:20	16.49	18.84	4.75212	-16.8094	-19.2049
2012-12-13 12:07:20	16.51	18.85	4.75906	-16.8298	-19.2151
2012-12-13 12:17:20	16.51	18.86	4.76601	-16.8298	-19.2253	2012-12-13 12:17:20
2012-12-13 12:27:20	16.55	18.89	4.77295	-16.8705	-19.2559
2012-12-13 12:37:20	16.56	18.92	4.7799	-16.8807	-19.2864
2012-12-13 12:47:20	16.59	18.95	4.78684	-16.9113	-19.317
2012-12-13 12:57:20	16.6	18.96	4.79378	-16.9215	-19.3272
2012-12-13 13:07:20	16.63	18.99	4.80073	-16.9521	-19.3578
2012-12-13 13:17:20	16.66	19.01	4.80767	-16.9827	-19.3782	2012-12-13 13:17:20
2012-12-13 13:27:20	16.69	19.04	4.81462	-17.0133	-19.4088
2012-12-13 13:37:20	16.7	19.06	4.82156	-17.0234	-19.4292
2012-12-13 13:47:20	16.73	19.08	4.82851	-17.054	-19.4495
2012-12-13 13:57:20	16.32	18.67	4.83545	-16.6361	-19.0316
2012-12-13 14:17:20	15.77	18.07	4.84934	-16.0754	-18.42
2012-12-13 14:27:20	15.88	18.17	4.85628	-16.1876	-18.5219	2012-12-13 14:27:20
2012-12-13 14:37:20	16.02	18.31	4.86323	-16.3303	-18.6646
2012-12-13 14:47:20	16.17	18.46	4.87017	-16.4832	-18.8175
2012-12-13 14:57:20	16.31	18.59	4.87712	-16.6259	-18.9501
2012-12-13 15:07:20	16.45	18.73	4.88406	-16.7686	-19.0928
2012-12-13 15:17:20	16.56	18.84	4.89101	-16.8807	-19.2049
2012-12-13 15:27:20	16.65	18.93	4.89795	-16.9725	-19.2966	2012-12-13 15:27:20
2012-12-13 15:37:20	16.73	19.01	4.9049	-17.054	-19.3782
2012-12-13 15:47:20	16.78	19.06	4.91184	-17.105	-19.4292
2012-12-13 15:57:20	16.81	19.09	4.91878	-17.1356	-19.4597
2012-12-13 16:07:20	16.86	19.13	4.92573	-17.1865	-19.5005
2012-12-13 16:17:20	16.91	19.18	4.93267	-17.2375	-19.5515
2012-12-13 16:27:20	16.96	19.25	4.93962	-17.2885	-19.6228	2012-12-13 16:27:20
2012-12-13 16:37:20	16.98	19.26	4.94656	-17.3089	-19.633
2012-12-13 16:47:20	17.01	19.3	4.95351	-17.3394	-19.6738
2012-12-13 16:57:20	17.05	19.33	4.96045	-17.3802	-19.7044
2012-12-13 17:07:20	17.08	19.36	4.9674	-17.4108	-19.735
2012-12-13 17:17:20	17.11	19.4	4.97434	-17.4414	-19.7757
2012-12-13 17:27:20	17.14	19.43	4.98128	-17.472	-19.8063	2012-12-13 17:27:20
2012-12-13 17:37:20	17.16	19.46	4.98823	-17.4924	-19.8369
2012-12-13 17:47:20	17.2	19.47	4.99517	-17.5331	-19.8471
2012-12-13 17:57:20	17.25	19.53	5.00212	-17.5841	-19.9083
2012-12-13 18:07:20	17.24	19.52	5.00906	-17.5739	-19.8981
2012-12-13 18:17:20	17.32	19.6	5.01601	-17.6555	-19.9796
2012-12-13 18:27:20	17.35	19.63	5.02295	-17.686	-20.0102	2012-12-13 18:27:20
2012-12-13 18:37:20	17.39	19.68	5.0299	-17.7268	-20.0612
2012-12-13 18:47:20	17.41	19.69	5.03684	-17.7472	-20.0714
2012-12-13 18:57:20	17.45	19.74	5.04378	-17.788	-20.1223
2012-12-13 19:07:20	17.5	19.79	5.05073	-17.8389	-20.1733
2012-12-13 19:17:20	17.53	19.81	5.05767	-17.8695	-20.1937
2012-12-13 19:27:20	17.56	19.85	5.06462	-17.9001	-20.2345	2012-12-13 19:27:20
2012-12-13 19:37:20	17.59	19.88	5.07156	-17.9307	-20.265
2012-12-13 19:47:20	17.62	19.91	5.07851	-17.9613	-20.2956
2012-12-13 19:57:20	17.65	19.95	5.08545	-17.9918	-20.3364
2012-12-13 20:07:20	17.69	19.97	5.0924	-18.0326	-20.3568
2012-12-13 20:17:20	17.73	20.02	5.09934	-18.0734	-20.4077
2012-12-13 20:27:20	17.77	20.05	5.10628	-18.1142	-20.4383	2012-12-13 20:27:20
2012-12-13 20:37:20	17.79	20.09	5.11323	-18.1346	-20.4791
2012-12-13 20:47:20	17.82	20.11	5.12017	-18.1651	-20.4995
2012-12-13 20:57:20	17.85	20.13	5.12712	-18.1957	-20.5199
2012-12-13 21:07:20	17.87	20.16	5.13406	-18.2161	-20.5505
2012-12-13 21:17:20	17.9	20.2	5.14101	-18.2467	-20.5912
2012-12-13 21:27:20	17.95	20.24	5.14795	-18.2977	-20.632	2012-12-13 21:27:20
2012-12-13 21:37:20	17.96	20.27	5.1549	-18.3078	-20.6626
2012-12-13 21:47:20	18	20.29	5.16184	-18.3486	-20.683
2012-12-13 21:57:20	18.16	20.46	5.16878	-18.5117	-20.8563
2012-12-13 22:07:20	18.05	20.34	5.17573	-18.3996	-20.7339
2012-12-13 22:17:20	18.06	20.37	5.18267	-18.4098	-20.7645
2012-12-13 22:27:20	18.11	20.41	5.18962	-18.4608	-20.8053	2012-12-13 22:27:20
2012-12-13 22:37:20	18.14	20.44	5.19656	-18.4913	-20.8359
2012-12-13 22:47:20	18.18	20.48	5.20351	-18.5321	-20.8767
2012-12-13 22:57:20	18.22	20.51	5.21045	-18.5729	-20.9072
2012-12-13 23:07:20	18.22	20.53	5.2174	-18.5729	-20.9276
2012-12-13 23:17:20	18.27	20.57	5.22434	-18.6239	-20.9684
2012-12-13 23:27:20	18.3	20.6	5.23128	-18.6544	-20.999	2012-12-13 23:27:20
2012-12-13 23:37:20	18.33	20.62	5.23823	-18.685	-21.0194
2012-12-13 23:47:20	18.34	20.65	5.24517	-18.6952	-21.0499
2012-12-13 23:57:20	18.39	20.69	5.25212	-18.7462	-21.0907
2012-12-14 00:07:20	18.4	20.71	5.25906	-18.7564	-21.1111
2012-12-14 00:17:20	18.43	20.74	5.26601	-18.787	-21.1417
2012-12-14 00:27:20	18.48	20.78	5.27295	-18.8379	-21.1825	2012-12-14 00:27:20
2012-12-14 00:37:20	18.5	20.81	5.2799	-18.8583	-21.213
2012-12-14 00:47:20	18.53	20.85	5.28684	-18.8889	-21.2538
2012-12-14 00:57:20	18.56	20.87	5.29378	-18.9195	-21.2742
2012-12-14 01:07:20	18.61	20.91	5.30073	-18.9704	-21.315
2012-12-14 01:17:20	18.63	20.94	5.30767	-18.9908	-21.3456
2012-12-14 01:27:20	18.66	20.97	5.31462	-19.0214	-21.3761	2012-12-14 01:27:20
2012-12-14 01:37:20	18.69	21.02	5.32156	-19.052	-21.4271
2012-12-14 01:47:20	18.74	21.05	5.32851	-19.103	-21.4577
2012-12-14 01:57:20	18.76	21.07	5.33545	-19.1233	-21.4781
2012-12-14 02:07:20	18.79	21.1	5.3424	-19.1539	-21.5087
2012-12-14 02:17:20	18.83	21.14	5.34934	-19.1947	-21.5494
2012-12-14 02:27:20	18.87	21.17	5.35628	-19.2355	-21.58	2012-12-14 02:27:20
2012-12-14 02:37:20	18.9	21.2	5.36323	-19.2661	-21.6106
2012-12-14 02:47:20	18.93	21.24	5.37017	-19.2966	-21.6514
2012-12-14 02:57:20	18.96	21.26	5.37712	-19.3272	-21.6718
2012-12-14 03:07:20	18.99	21.3	5.38406	-19.3578	-21.7125
2012-12-14 03:17:20	19.01	21.33	5.39101	-19.3782	-21.7431
2012-12-14 03:27:20	19.05	21.36	5.39795	-19.419	-21.7737	2012-12-14 03:27:20
2012-12-14 03:37:20	19.09	21.4	5.4049	-19.4597	-21.8145
2012-12-14 03:47:20	19.12	21.43	5.41184	-19.4903	-21.8451
2012-12-14 03:57:20	19.14	21.45	5.41878	-19.5107	-21.8654
2012-12-14 04:07:20	19.18	21.5	5.42573	-19.5515	-21.9164
2012-12-14 04:17:20	19.22	21.53	5.43267	-19.5923	-21.947
2012-12-14 04:27:20	19.26	21.57	5.43962	-19.633	-21.9878	2012-12-14 04:27:20
2012-12-14 04:37:20	19.28	21.6	5.44656	-19.6534	-22.0183
2012-12-14 04:47:20	19.32	21.64	5.45351	-19.6942	-22.0591
2012-12-14 04:57:20	19.35	21.66	5.46045	-19.7248	-22.0795
2012-12-14 05:07:20	19.38	21.68	5.4674	-19.7554	-22.0999
2012-12-14 05:17:20	19.42	21.73	5.47434	-19.7961	-22.1509
2012-12-14 05:27:20	19.45	21.75	5.48128	-19.8267	-22.1713	2012-12-14 05:27:20
2012-12-14 05:37:20	19.47	21.79	5.48823	-19.8471	-22.212
2012-12-14 05:47:20	19.49	21.81	5.49517	-19.8675	-22.2324
2012-12-14 05:57:20	19.54	21.85	5.50212	-19.9185	-22.2732
2012-12-14 06:07:20	19.56	21.88	5.50906	-19.9388	-22.3038
2012-12-14 06:17:20	19.61	21.91	5.51601	-19.9898	-22.3344
2012-12-14 06:27:20	19.63	21.95	5.52295	-20.0102	-22.3751	2012-12-14 06:27:20
2012-12-14 06:37:20	19.68	21.99	5.5299	-20.0612	-22.4159
2012-12-14 06:47:20	19.71	22.03	5.53684	-20.0917	-22.4567
2012-12-14 06:57:20	19.74	22.06	5.54378	-20.1223	-22.4873
2012-12-14 07:07:20	19.75	22.07	5.55073	-20.1325	-22.4975
2012-12-14 07:17:20	19.8	22.11	5.55767	-20.1835	-22.5382
2012-12-14 07:27:20	19.83	22.14	5.56462	-20.2141	-22.5688	2012-12-14 07:27:20
2012-12-14 07:37:20	19.87	22.18	5.57156	-20.2548	-22.6096
2012-12-14 07:47:20	19.89	22.21	5.57851	-20.2752	-22.6402
2012-12-14 07:57:20	19.94	22.24	5.58545	-20.3262	-22.6707
2012-12-14 08:07:20	19.95	22.28	5.5924	-20.3364	-22.7115
2012-12-14 08:17:20	20	22.32	5.59934	-20.3874	-22.7523
2012-12-14 08:27:20	20.01	22.32	5.60628	-20.3976	-22.7523	2012-12-14 08:27:20
2012-12-14 08:37:20	20.03	22.35	5.61323	-20.4179	-22.7829
2012-12-14 08:47:20	20.05	22.38	5.62017	-20.4383	-22.8135
2012-12-14 08:57:20	20.07	22.4	5.62712	-20.4587	-22.8338
2012-12-14 09:07:20	20.12	22.44	5.63406	-20.5097	-22.8746
2012-12-14 09:17:20	20.15	22.47	5.64101	-20.5403	-22.9052
2012-12-14 09:27:20	20.15	22.46	5.64795	-20.5403	-22.895	2012-12-14 09:27:20
2012-12-14 09:37:20	20.19	22.51	5.6549	-20.581	-22.946
2012-12-14 09:47:20	20.23	22.54	5.66184	-20.6218	-22.9766
2012-12-14 09:57:20	20.23	22.55	5.66878	-20.6218	-22.9867
2012-12-14 10:07:20	20.25	22.59	5.67573	-20.6422	-23.0275
2012-12-14 10:17:20	20.29	22.62	5.68267	-20.683	-23.0581
2012-12-14 10:27:20	20.31	22.65	5.68962	-20.7034	-23.0887	2012-12-14 10:27:20
2012-12-14 10:37:20	20.35	22.67	5.69656	-20.7441	-23.1091
2012-12-14 10:47:20	20.38	22.67	5.70351	-20.7747	-23.1091
2012-12-14 10:57:20	20.41	22.72	5.71045	-20.8053	-23.16
2012-12-14 11:07:20	20.45	22.76	5.7174	-20.8461	-23.2008
2012-12-14 11:17:20	20.48	22.79	5.72434	-20.8767	-23.2314
2012-12-14 11:27:20	20.51	22.83	5.73128	-20.9072	-23.2722	2012-12-14 11:27:20
2012-12-14 11:37:20	20.55	22.86	5.73823	-20.948	-23.3028
2012-12-14 11:47:20	20.59	22.91	5.74517	-20.9888	-23.3537
2012-12-14 11:57:20	20.63	22.94	5.75212	-21.0296	-23.3843
2012-12-14 12:07:20	20.66	22.96	5.75906	-21.0601	-23.4047
2012-12-14 12:17:20	20.69	22.98	5.76601	-21.0907	-23.4251
2012-12-14 12:27:20	20.71	23.03	5.77295	-21.1111	-23.476	2012-12-14 12:27:20
2012-12-14 12:37:20	20.74	23.06	5.7799	-21.1417	-23.5066
2012-12-14 12:47:20	20.77	23.08	5.78684	-21.1723	-23.527
2012-12-14 12:57:20	20.81	23.12	5.79378	-21.213	-23.5678
2012-12-14 13:07:20	20.83	23.15	5.80073	-21.2334	-23.5984
2012-12-14 13:17:20	20.87	23.18	5.80767	-21.2742	-23.629
2012-12-14 13:27:20	20.92	23.22	5.81462	-21.3252	-23.6697	2012-12-14 13:27:20
2012-12-14 13:37:20	20.94	23.25	5.82156	-21.3456	-23.7003
2012-12-14 13:47:20	20.98	23.29	5.82851	-21.3863	-23.7411
2012-12-14 13:57:20	21.01	23.32	5.83545	-21.4169	-23.7717
2012-12-14 14:07:20	21.05	23.34	5.8424	-21.4577	-23.792
2012-12-14 14:17:20	21.07	23.38	5.84934	-21.4781	-23.8328
2012-12-14 14:27:20	21.12	23.42	5.85628	-21.5291	-23.8736	2012-12-14 14:27:20
2012-12-14 14:37:20	21.16	23.46	5.86323	-21.5698	-23.9144
2012-12-14 14:47:20	21.17	23.46	5.87017	-21.58	-23.9144
2012-12-14 14:57:20	21.24	23.54	5.87712	-21.6514	-23.9959
2012-12-14 15:07:20	21.27	23.57	5.88406	-21.682	-24.0265
2012-12-14 15:17:20	21.32	23.62	5.89101	-21.7329	-24.0775
2012-12-14 15:27:20	21.32	23.65	5.89795	-21.7329	-24.1081	2012-12-14 15:27:20
2012-12-14 15:37:20	21.4	23.67	5.9049	-21.8145	-24.1284
2012-12-14 15:47:20	21.39	23.71	5.91184	-21.8043	-24.1692
2012-12-14 15:57:20	21.43	23.74	5.91878	-21.8451	-24.1998
2012-12-14 16:07:20	21.48	23.79	5.92573	-21.896	-24.2508
2012-12-14 16:17:20	21.51	23.82	5.93267	-21.9266	-24.2813
2012-12-14 16:27:20	21.54	23.85	5.93962	-21.9572	-24.3119	2012-12-14 16:27:20
2012-12-14 16:37:20	21.58	23.88	5.94656	-21.998	-24.3425
2012-12-14 16:47:20	21.61	23.92	5.95351	-22.0285	-24.3833
2012-12-14 16:57:20	21.65	23.94	5.96045	-22.0693	-24.4037
2012-12-14 17:07:20	21.69	24	5.9674	-22.1101	-24.4648
2012-12-14 17:17:20	21.72	24.04	5.97434	-22.1407	-24.5056
2012-12-14 17:27:20	21.77	24.07	5.98128	-22.1916	-24.5362	2012-12-14 17:27:20
2012-12-14 17:37:20	21.81	24.12	5.98823	-22.2324	-24.5872
2012-12-14 17:47:20	21.85	24.16	5.99517	-22.2732	-24.6279
2012-12-14 17:57:20	21.89	24.2	6.00212	-22.314	-24.6687
2012-12-14 18:07:20	21.92	24.23	6.00906	-22.3445	-24.6993
2012-12-14 18:17:20	21.95	24.26	6.01601	-22.3751	-24.7299
2012-12-14 18:27:20	22	24.3	6.02295	-22.4261	-24.7706	2012-12-14 18:27:20
2012-12-14 18:37:20	22.04	24.35	6.0299	-22.4669	-24.8216
2012-12-14 18:47:20	22.09	24.4	6.03684	-22.5178	-24.8726
2012-12-14 18:57:20	22.08	24.41	6.04378	-22.5076	-24.8828
2012-12-14 19:07:20	22.13	24.45	6.05073	-22.5586	-24.9235
2012-12-14 19:17:20	22.17	24.49	6.05767	-22.5994	-24.9643
2012-12-14 19:27:20	22.2	24.52	6.06462	-22.63	-24.9949	2012-12-14 19:27:20
2012-12-14 19:37:20	22.26	24.59	6.07156	-22.6911	-25.0663
2012-12-14 19:47:20	22.29	24.6	6.07851	-22.7217	-25.0765
2012-12-14 19:57:20	22.24	24.51	6.08545	-22.6707	-24.9847
2012-12-14 20:07:20	22.18	24.51	6.0924	-22.6096	-24.9847
2012-12-14 20:17:20	22.35	24.65	6.09934	-22.7829	-25.1274
2012-12-14 20:27:20	22.36	24.65	6.10628	-22.7931	-25.1274	2012-12-14 20:27:20
2012-12-14 20:37:20	22.41	24.7	6.11323	-22.844	-25.1784
2012-12-14 20:47:20	22.46	24.75	6.12017	-22.895	-25.2294
2012-12-14 20:57:20	22.5	24.8	6.12712	-22.9358	-25.2803
2012-12-14 21:07:20	22.55	24.85	6.13406	-22.9867	-25.3313
2012-12-14 21:17:20	22.59	24.88	6.14101	-23.0275	-25.3619
2012-12-14 21:27:20	22.63	24.93	6.14795	-23.0683	-25.4128	2012-12-14 21:27:20
2012-12-14 21:37:20	22.67	24.95	6.1549	-23.1091	-25.4332
2012-12-14 21:47:20	22.73	25.04	6.16184	-23.1702	-25.525
2012-12-14 21:57:20	22.76	25.06	6.16878	-23.2008	-25.5454
2012-12-14 22:07:20	22.8	25.11	6.17573	-23.2416	-25.5963
2012-12-14 22:17:20	22.85	25.16	6.18267	-23.2926	-25.6473
2012-12-14 22:27:20	22.87	25.18	6.18962	-23.3129	-25.6677	2012-12-14 22:27:20
2012-12-14 22:37:20	22.91	25.21	6.19656	-23.3537	-25.6983
2012-12-14 22:47:20	22.94	25.24	6.20351	-23.3843	-25.7288
2012-12-14 22:57:20	22.97	25.29	6.21045	-23.4149	-25.7798
2012-12-14 23:07:20	23.01	25.32	6.2174	-23.4557	-25.8104
2012-12-14 23:17:20	23.06	25.37	6.22434	-23.5066	-25.8614
2012-12-14 23:27:20	23.09	25.4	6.23128	-23.5372	-25.8919	2012-12-14 23:27:20
2012-12-14 23:37:20	23.11	25.42	6.23823	-23.5576	-25.9123
2012-12-14 23:47:20	23.17	25.47	6.24517	-23.6188	-25.9633
2012-12-14 23:57:20	23.21	25.52	6.25212	-23.6595	-26.0143
2012-12-15 00:07:20	23.26	25.56	6.25906	-23.7105	-26.055
2012-12-15 00:17:20	23.27	25.59	6.26601	-23.7207	-26.0856
2012-12-15 00:27:20	23.32	25.64	6.27295	-23.7717	-26.1366	2012-12-15 00:27:20
2012-12-15 00:37:20	23.32	25.67	6.2799	-23.7717	-26.1672
2012-12-15 00:47:20	23.38	25.7	6.28684	-23.8328	-26.1978
2012-12-15 00:57:20	23.43	25.74	6.29378	-23.8838	-26.2385
2012-12-15 01:07:20	23.45	25.76	6.30073	-23.9042	-26.2589
2012-12-15 01:17:20	23.51	25.82	6.30767	-23.9653	-26.3201
2012-12-15 01:27:20	23.52	25.86	6.31462	-23.9755	-26.3609	2012-12-15 01:27:20
2012-12-15 01:37:20	23.59	25.91	6.32156	-24.0469	-26.4118
2012-12-15 01:47:20	23.62	25.94	6.32851	-24.0775	-26.4424
2012-12-15 01:57:20	23.67	25.99	6.33545	-24.1284	-26.4934
2012-12-15 02:07:20	23.72	26.03	6.3424	-24.1794	-26.5341
2012-12-15 02:17:20	23.74	26.07	6.34934	-24.1998	-26.5749
2012-12-15 02:27:20	23.8	26.11	6.35628	-24.261	-26.6157	2012-12-15 02:27:20
2012-12-15 02:37:20	23.82	26.13	6.36323	-24.2813	-26.6361
2012-12-15 02:47:20	23.86	26.18	6.37017	-24.3221	-26.6871
2012-12-15 02:57:20	23.92	26.23	6.37712	-24.3833	-26.738
2012-12-15 03:07:20	23.95	26.27	6.38406	-24.4139	-26.7788
2012-12-15 03:17:20	23.99	26.3	6.39101	-24.4546	-26.8094
2012-12-15 03:27:20	24.01	26.34	6.39795	-24.475	-26.8502	2012-12-15 03:27:20
2012-12-15 03:37:20	24.02	26.37	6.4049	-24.4852	-26.8807
2012-12-15 03:47:20	24.08	26.41	6.41184	-24.5464	-26.9215
2012-12-15 03:57:20	24.12	26.44	6.41878	-24.5872	-26.9521
2012-12-15 04:07:20	24.15	26.48	6.42573	-24.6177	-26.9929
2012-12-15 04:17:20	24.22	26.53	6.43267	-24.6891	-27.0438
2012-12-15 04:27:20	24.24	26.58	6.43962	-24.7095	-27.0948	2012-12-15 04:27:20
2012-12-15 04:37:20	24.28	26.6	6.44656	-24.7503	-27.1152
2012-12-15 04:47:20	24.33	26.65	6.45351	-24.8012	-27.1662
2012-12-15 04:57:20	24.37	26.69	6.46045	-24.842	-27.2069
2012-12-15 05:07:20	24.41	26.72	6.4674	-24.8828	-27.2375
2012-12-15 05:17:20	24.43	26.78	6.47434	-24.9032	-27.2987
2012-12-15 05:27:20	24.47	26.8	6.48128	-24.9439	-27.3191	2012-12-15 05:27:20
2012-12-15 05:37:20	24.5	26.84	6.48823	-24.9745	-27.3598
2012-12-15 05:47:20	24.56	26.88	6.49517	-25.0357	-27.4006
2012-12-15 05:57:20	24.6	26.91	6.50212	-25.0765	-27.4312
2012-12-15 06:07:20	24.62	26.95	6.50906	-25.0968	-27.472
2012-12-15 06:17:20	24.65	26.99	6.51601	-25.1274	-27.5127
2012-12-15 06:27:20	24.68	27.02	6.52295	-25.158	-27.5433	2012-12-15 06:27:20
2012-12-15 06:37:20	24.71	27.05	6.5299	-25.1886	-27.5739
2012-12-15 06:47:20	24.76	27.1	6.53684	-25.2396	-27.6249
2012-12-15 06:57:20	24.8	27.12	6.54378	-25.2803	-27.6453
2012-12-15 07:07:20	24.83	27.16	6.55073	-25.3109	-27.686
2012-12-15 07:17:20	24.86	27.19	6.55767	-25.3415	-27.7166
2012-12-15 07:27:20	24.9	27.23	6.56462	-25.3823	-27.7574	2012-12-15 07:27:20
2012-12-15 07:37:20	24.95	27.28	6.57156	-25.4332	-27.8084
2012-12-15 07:47:20	24.99	27.32	6.57851	-25.474	-27.8491
2012-12-15 07:57:20	25.01	27.35	6.58545	-25.4944	-27.8797
2012-12-15 08:07:20	25.04	27.38	6.5924	-25.525	-27.9103
2012-12-15 08:17:20	25.07	27.41	6.59934	-25.5556	-27.9409
2012-12-15 08:27:20	25.11	27.44	6.60628	-25.5963	-27.9715	2012-12-15 08:27:20
2012-12-15 08:37:20	25.14	27.47	6.61323	-25.6269	-28.002
2012-12-15 08:47:20	25.19	27.52	6.62017	-25.6779	-28.053
2012-12-15 08:57:20	25.23	27.57	6.62712	-25.7187	-28.104
2012-12-15 09:07:20	25.26	27.59	6.63406	-25.7492	-28.1244
2012-12-15 09:17:20	25.29	27.63	6.64101	-25.7798	-28.1651
2012-12-15 09:27:20	25.35	27.68	6.64795	-25.841	-28.2161	2012-12-15 09:27:20
2012-12-15 09:37:20	25.4	27.73	6.6549	-25.8919	-28.2671
2012-12-15 09:47:20	25.43	27.77	6.66184	-25.9225	-28.3078
2012-12-15 09:57:20	25.48	27.81	6.66878	-25.9735	-28.3486
2012-12-15 10:07:20	25.51	27.85	6.67573	-26.0041	-28.3894
2012-12-15 10:17:20	25.56	27.89	6.68267	-26.055	-28.4302
2012-12-15 10:27:20	25.6	27.93	6.68962	-26.0958	-28.4709	2012-12-15 10:27:20
2012-12-15 10:37:20	25.62	27.96	6.69656	-26.1162	-28.5015
2012-12-15 10:47:20	25.67	28.01	6.70351	-26.1672	-28.5525
2012-12-15 10:57:20	25.71	28.03	6.71045	-26.208	-28.5729
2012-12-15 11:07:20	25.75	28.08	6.7174	-26.2487	-28.6239
2012-12-15 11:17:20	25.79	28.14	6.72434	-26.2895	-28.685
2012-12-15 11:27:20	25.83	28.17	6.73128	-26.3303	-28.7156	2012-12-15 11:27:20
2012-12-15 11:37:20	25.87	28.2	6.73823	-26.371	-28.7462
2012-12-15 11:47:20	25.82	28.18	6.74517	-26.3201	-28.7258
2012-12-15 11:57:20	25.91	28.27	6.75212	-26.4118	-28.8175
2012-12-15 12:07:20	25.95	28.31	6.75906	-26.4526	-28.8583
2012-12-15 12:17:20	25.99	28.34	6.76601	-26.4934	-28.8889
2012-12-15 12:27:20	26.04	28.39	6.77295	-26.5443	-28.9399	2012-12-15 12:27:20
2012-12-15 12:37:20	26.1	28.44	6.7799	-26.6055	-28.9908
2012-12-15 12:47:20	26.14	28.49	6.78684	-26.6463	-29.0418
2012-12-15 12:57:20	26.17	28.52	6.79378	-26.6769	-29.0724
2012-12-15 13:07:20	26.22	28.57	6.80073	-26.7278	-29.1233
2012-12-15 13:17:20	26.25	28.6	6.80767	-26.7584	-29.1539
2012-12-15 13:27:20	26.3	28.66	6.81462	-26.8094	-29.2151	2012-12-15 13:27:20
2012-12-15 13:37:20	26.35	28.7	6.82156	-26.8603	-29.2559
2012-12-15 13:47:20	26.39	28.74	6.82851	-26.9011	-29.2966
2012-12-15 13:57:20	26.41	28.76	6.83545	-26.9215	-29.317
2012-12-15 14:07:20	26.46	28.82	6.8424	-26.9725	-29.3782
2012-12-15 14:17:20	26.51	28.86	6.84934	-27.0234	-29.419
2012-12-15 14:27:20	26.56	28.91	6.85628	-27.0744	-29.4699	2012-12-15 14:27:20
2012-12-15 14:37:20	26.6	28.95	6.86323	-27.1152	-29.5107
2012-12-15 14:47:20	26.63	28.99	6.87017	-27.1458	-29.5515
2012-12-15 14:57:20	26.68	29.04	6.87712	-27.1967	-29.6024
2012-12-15 15:07:20	26.73	29.09	6.88406	-27.2477	-29.6534
2012-12-15 15:17:20	26.75	29.12	6.89101	-27.2681	-29.684
2012-12-15 15:27:20	26.82	29.18	6.89795	-27.3394	-29.7452	2012-12-15 15:27:20
2012-12-15 15:37:20	26.86	29.22	6.9049	-27.3802	-29.7859
2012-12-15 15:47:20	26.92	29.27	6.91184	-27.4414	-29.8369
2012-12-15 15:57:20	26.96	29.3	6.91878	-27.4822	-29.8675
2012-12-15 16:07:20	27	29.35	6.92573	-27.5229	-29.9185
2012-12-15 16:17:20	27.03	29.39	6.93267	-27.5535	-29.9592
2012-12-15 16:27:20	27.08	29.43	6.93962	-27.6045	-30	2012-12-15 16:27:20
2012-12-15 16:37:20	27.12	29.46	6.94656	-27.6453	-30.0306
2012-12-15 16:47:20	27.17	29.52	6.95351	-27.6962	-30.0917
2012-12-15 16:57:20	27.22	29.58	6.96045	-27.7472	-30.1529
2012-12-15 17:07:20	27.27	29.63	6.9674	-27.7982	-30.2039
2012-12-15 17:17:20	27.32	29.67	6.97434	-27.8491	-30.2446
2012-12-15 17:27:20	27.35	29.71	6.98128	-27.8797	-30.2854	2012-12-15 17:27:20
2012-12-15 17:37:20	27.4	29.74	6.98823	-27.9307	-30.316
2012-12-15 17:47:20	27.45	29.81	6.99517	-27.9817	-30.3874
2012-12-15 17:57:20	27.49	29.85	7.00212	-28.0224	-30.4281
2012-12-15 18:07:20	27.53	29.9	7.00906	-28.0632	-30.4791
2012-12-15 18:17:20	27.6	29.95	7.01601	-28.1346	-30.5301
2012-12-15 18:27:20	27.64	30	7.02295	-28.1753	-30.581	2012-12-15 18:27:20
2012-12-15 18:37:20	27.69	30.05	7.0299	-28.2263	-30.632
2012-12-15 18:47:20	27.75	30.11	7.03684	-28.2875	-30.6932
2012-12-15 18:57:20	27.79	30.15	7.04378	-28.3282	-30.7339
2012-12-15 19:07:20	27.84	30.2	7.05073	-28.3792	-30.7849
2012-12-15 19:17:20	27.88	30.23	7.05767	-28.42	-30.8155
2012-12-15 19:27:20	27.93	30.28	7.06462	-28.4709	-30.8665	2012-12-15 19:27:20
2012-12-15 19:37:20	27.98	30.33	7.07156	-28.5219	-30.9174
2012-12-15 19:47:20	28.03	30.39	7.07851	-28.5729	-30.9786
2012-12-15 19:57:20	28.08	30.44	7.08545	-28.6239	-31.0296
2012-12-15 20:07:20	28.13	30.48	7.0924	-28.6748	-31.0703
2012-12-15 20:17:20	28.18	30.54	7.09934	-28.7258	-31.1315
2012-12-15 20:27:20	28.22	30.59	7.10628	-28.7666	-31.1825	2012-12-15 20:27:20
2012-12-15 20:37:20	28.27	30.63	7.11323	-28.8175	-31.2232
2012-12-15 20:47:20	28.33	30.69	7.12017	-28.8787	-31.2844
2012-12-15 20:57:20	28.39	30.73	7.12712	-28.9399	-31.3252
2012-12-15 21:07:20	28.43	30.78	7.13406	-28.9806	-31.3761
2012-12-15 21:17:20	28.49	30.85	7.14101	-29.0418	-31.4475
2012-12-15 21:27:20	28.54	30.9	7.14795	-29.0928	-31.4985	2012-12-15 21:27:20
2012-12-15 21:37:20	28.61	30.96	7.1549	-29.1641	-31.5596
2012-12-15 21:47:20	28.67	31	7.16184	-29.2253	-31.6004
2012-12-15 21:57:20	28.71	31.06	7.16878	-29.2661	-31.6616
2012-12-15 22:07:20	28.77	31.1	7.17573	-29.3272	-31.7023
2012-12-15 22:17:20	28.82	31.16	7.18267	-29.3782	-31.7635
2012-12-15 22:27:20	28.86	31.23	7.18962	-29.419	-31.8349	2012-12-15 22:27:20
2012-12-15 22:37:20	28.92	31.28	7.19656	-29.4801	-31.8858
2012-12-15 22:47:20	28.97	31.33	7.20351	-29.5311	-31.9368
2012-12-15 22:57:20	29.01	31.37	7.21045	-29.5719	-31.9776
2012-12-15 23:07:20	29.08	31.43	7.2174	-29.6432	-32.0387
2012-12-15 23:17:20	29.13	31.49	7.22434	-29.6942	-32.0999
2012-12-15 23:27:20	29.19	31.55	7.23128	-29.7554	-32.1611	2012-12-15 23:27:20
2012-12-15 23:37:20	29.24	31.59	7.23823	-29.8063	-32.2018
2012-12-15 23:47:20	29.27	31.64	7.24517	-29.8369	-32.2528
2012-12-15 23:57:20	29.29	31.71	7.25212	-29.8573	-32.3242
2012-12-16 00:07:20	29.4	31.75	7.25906	-29.9694	-32.3649
2012-12-16 00:17:20	29.45	31.8	7.26601	-30.0204	-32.4159
2012-12-16 00:27:20	29.51	31.86	7.27295	-30.0815	-32.4771	2012-12-16 00:27:20
2012-12-16 00:37:20	29.55	31.92	7.2799	-30.1223	-32.5382
2012-12-16 00:47:20	29.62	31.99	7.28684	-30.1937	-32.6096
2012-12-16 00:57:20	29.68	32.03	7.29378	-30.2548	-32.6504
2012-12-16 01:07:20	29.73	32.09	7.30073	-30.3058	-32.7115
2012-12-16 01:17:20	29.79	32.15	7.30767	-30.367	-32.7727
2012-12-16 01:27:20	29.85	32.21	7.31462	-30.4281	-32.8338	2012-12-16 01:27:20
2012-12-16 01:37:20	29.91	32.22	7.32156	-30.4893	-32.844
2012-12-16 01:47:20	29.95	32.32	7.32851	-30.5301	-32.946
2012-12-16 01:57:20	30.02	32.39	7.33545	-30.6014	-33.0173
2012-12-16 02:07:20	30.06	32.43	7.3424	-30.6422	-33.0581
2012-12-16 02:17:20	30.12	32.48	7.34934	-30.7034	-33.1091
2012-12-16 02:27:20	30.18	32.54	7.35628	-30.7645	-33.1702	2012-12-16 02:27:20
2012-12-16 02:37:20	30.22	32.59	7.36323	-30.8053	-33.2212
2012-12-16 02:47:20	30.28	32.64	7.37017	-30.8665	-33.2722
2012-12-16 02:57:20	30.32	32.69	7.37712	-30.9072	-33.3231
2012-12-16 03:07:20	30.37	32.74	7.38406	-30.9582	-33.3741
2012-12-16 03:17:20	30.45	32.81	7.39101	-31.0398	-33.4455
2012-12-16 03:27:20	30.49	32.86	7.39795	-31.0805	-33.4964	2012-12-16 03:27:20
2012-12-16 03:37:20	30.55	32.92	7.4049	-31.1417	-33.5576
2012-12-16 03:47:20	30.6	32.98	7.41184	-31.1927	-33.6188
2012-12-16 03:57:20	30.66	33.03	7.41878	-31.2538	-33.6697
2012-12-16 04:07:20	30.72	33.09	7.42573	-31.315	-33.7309
2012-12-16 04:17:20	30.78	33.16	7.43267	-31.3761	-33.8022
2012-12-16 04:27:20	30.86	33.23	7.43962	-31.4577	-33.8736	2012-12-16 04:27:20
2012-12-16 04:37:20	30.93	33.29	7.44656	-31.5291	-33.9348
2012-12-16 04:47:20	30.98	33.34	7.45351	-31.58	-33.9857
2012-12-16 04:57:20	31.03	33.4	7.46045	-31.631	-34.0469
2012-12-16 05:07:20	31.08	33.46	7.4674	-31.682	-34.1081
2012-12-16 05:17:20	31.13	33.54	7.47434	-31.7329	-34.1896
2012-12-16 05:27:20	31.22	33.6	7.48128	-31.8247	-34.2508	2012-12-16 05:27:20
2012-12-16 05:37:20	31.29	33.65	7.48823	-31.896	-34.3017
2012-12-16 05:47:20	31.32	33.72	7.49517	-31.9266	-34.3731
2012-12-16 05:57:20	31.4	33.78	7.50212	-32.0082	-34.4343
2012-12-16 06:07:20	31.47	33.84	7.50906	-32.0795	-34.4954
2012-12-16 06:17:20	31.54	33.9	7.51601	-32.1509	-34.5566
2012-12-16 06:27:20	31.6	33.98	7.52295	-32.212	-34.6381	2012-12-16 06:27:20
2012-12-16 06:37:20	31.57	34	7.5299	-32.1814	-34.6585
2012-12-16 06:47:20	31.69	34.07	7.53684	-32.3038	-34.7299
2012-12-16 06:57:20	31.76	34.14	7.54378	-32.3751	-34.8012
2012-12-16 07:07:20	31.82	34.2	7.55073	-32.4363	-34.8624
2012-12-16 07:17:20	31.89	34.27	7.55767	-32.5076	-34.9337
2012-12-16 07:27:20	31.94	34.32	7.56462	-32.5586	-34.9847	2012-12-16 07:27:20
2012-12-16 07:37:20	32.02	34.4	7.57156	-32.6402	-35.0663
2012-12-16 07:47:20	32.08	34.46	7.57851	-32.7013	-35.1274
2012-12-16 07:57:20	32.16	34.54	7.58545	-32.7829	-35.209
2012-12-16 08:07:20	32.22	34.59	7.5924	-32.844	-35.2599
2012-12-16 08:17:20	32.28	34.65	7.59934	-32.9052	-35.3211
2012-12-16 08:27:20	32.34	34.72	7.60628	-32.9664	-35.3925	2012-12-16 08:27:20
2012-12-16 08:37:20	32.38	34.78	7.61323	-33.0071	-35.4536
2012-12-16 08:47:20	32.43	34.82	7.62017	-33.0581	-35.4944
2012-12-16 08:57:20	32.54	34.91	7.62712	-33.1702	-35.5861
2012-12-16 09:07:20	32.58	34.95	7.63406	-33.211	-35.6269
2012-12-16 09:17:20	32.65	35.03	7.64101	-33.2824	-35.7085
2012-12-16 09:27:20	32.71	35.09	7.64795	-33.3435	-35.7696	2012-12-16 09:27:20
2012-12-16 09:37:20	32.77	35.14	7.6549	-33.4047	-35.8206
2012-12-16 09:47:20	32.84	35.2	7.66184	-33.476	-35.8818
2012-12-16 09:57:20	32.9	35.26	7.66878	-33.5372	-35.9429
2012-12-16 10:07:20	32.97	35.34	7.67573	-33.6086	-36.0245
2012-12-16 10:17:20	33.03	35.39	7.68267	-33.6697	-36.0754
2012-12-16 10:27:20	33.07	35.46	7.68962	-33.7105	-36.1468	2012-12-16 10:27:20
2012-12-16 10:37:20	33.17	35.55	7.69656	-33.8124	-36.2385
2012-12-16 10:47:20	33.22	35.61	7.70351	-33.8634	-36.2997
2012-12-16 10:57:20	33.29	35.66	7.71045	-33.9348	-36.3507
2012-12-16 11:07:20	33.35	35.71	7.7174	-33.9959	-36.4016
2012-12-16 11:17:20	33.41	35.79	7.72434	-34.0571	-36.4832
2012-12-16 11:27:20	33.49	35.87	7.73128	-34.1386	-36.5647	2012-12-16 11:27:20
2012-12-16 11:37:20	33.56	35.94	7.73823	-34.21	-36.6361
2012-12-16 11:47:20	33.63	36.01	7.74517	-34.2813	-36.7074
2012-12-16 11:57:20	33.71	36.08	7.75212	-34.3629	-36.7788
2012-12-16 12:07:20	33.76	36.13	7.75906	-34.4139	-36.8298
2012-12-16 12:17:20	33.83	36.2	7.76601	-34.4852	-36.9011
2012-12-16 12:27:20	33.91	36.29	7.77295	-34.5668	-36.9929	2012-12-16 12:27:20
2012-12-16 12:37:20	33.95	36.34	7.7799	-34.6075	-37.0438
2012-12-16 12:47:20	34.03	36.42	7.78684	-34.6891	-37.1254
2012-12-16 12:57:20	34.1	36.49	7.79378	-34.7604	-37.1967
2012-12-16 13:07:20	34.18	36.55	7.80073	-34.842	-37.2579
2012-12-16 13:17:20	34.23	36.63	7.80767	-34.893	-37.3394
2012-12-16 13:27:20	34.3	36.68	7.81462	-34.9643	-37.3904	2012-12-16 13:27:20
2012-12-16 13:37:20	34.37	36.75	7.82156	-35.0357	-37.4618
2012-12-16 13:47:20	34.45	36.85	7.82851	-35.1172	-37.5637
2012-12-16 13:57:20	34.53	36.91	7.83545	-35.1988	-37.6249
2012-12-16 14:07:20	34.59	36.99	7.8424	-35.2599	-37.7064
2012-12-16 14:17:20	34.66	37.06	7.84934	-35.3313	-37.7778
2012-12-16 14:27:20	34.75	37.14	7.85628	-35.423	-37.8593	2012-12-16 14:27:20
2012-12-16 14:37:20	34.7	37.11	7.86323	-35.3721	-37.8287
2012-12-16 14:47:20	34.89	37.28	7.87017	-35.5657	-38.002
2012-12-16 14:57:20	34.96	37.34	7.87712	-35.6371	-38.0632
2012-12-16 15:07:20	35.04	37.41	7.88406	-35.7187	-38.1346
2012-12-16 15:17:20	35.1	37.47	7.89101	-35.7798	-38.1957
2012-12-16 15:27:20	35.19	37.59	7.89795	-35.8716	-38.318	2012-12-16 15:27:20
2012-12-16 15:37:20	35.25	37.64	7.9049	-35.9327	-38.369
2012-12-16 15:47:20	35.33	37.72	7.91184	-36.0143	-38.4506
2012-12-16 15:57:20	35.42	37.82	7.91878	-36.106	-38.5525
2012-12-16 16:07:20	35.49	37.89	7.92573	-36.1774	-38.6239
2012-12-16 16:17:20	35.56	37.96	7.93267	-36.2487	-38.6952
2012-12-16 16:27:20	35.64	38.03	7.93962	-36.3303	-38.7666	2012-12-16 16:27:20
2012-12-16 16:37:20	35.72	38.11	7.94656	-36.4118	-38.8481
2012-12-16 16:47:20	35.79	38.18	7.95351	-36.4832	-38.9195
2012-12-16 16:57:20	35.84	38.21	7.96045	-36.5341	-38.9501
2012-12-16 17:07:20	35.93	38.32	7.9674	-36.6259	-39.0622
2012-12-16 17:17:20	36	38.38	7.97434	-36.6972	-39.1233
2012-12-16 17:27:20	36.09	38.46	7.98128	-36.789	-39.2049	2012-12-16 17:27:20
2012-12-16 17:37:20	36.17	38.58	7.98823	-36.8705	-39.3272
2012-12-16 17:47:20	36.26	38.66	7.99517	-36.9623	-39.4088
2012-12-16 17:57:20	36.37	38.75	8.00212	-37.0744	-39.5005
2012-12-16 18:07:20	36.45	38.85	8.00906	-37.156	-39.6024
2012-12-16 18:17:20	36.54	38.93	8.01601	-37.2477	-39.684
2012-12-16 18:27:20	36.61	39.01	8.02295	-37.3191	-39.7655	2012-12-16 18:27:20
2012-12-16 18:37:20	36.71	39.1	8.0299	-37.421	-39.8573
2012-12-16 18:47:20	36.81	39.21	8.03684	-37.5229	-39.9694
2012-12-16 18:57:20	36.9	39.29	8.04378	-37.6147	-40.051
2012-12-16 19:07:20	36.95	39.36	8.05073	-37.6656	-40.1223
2012-12-16 19:17:20	37.06	39.46	8.05767	-37.7778	-40.2243
2012-12-16 19:27:20	37.18	39.56	8.06462	-37.9001	-40.3262	2012-12-16 19:27:20
2012-12-16 19:37:20	37.26	39.65	8.07156	-37.9817	-40.4179
2012-12-16 19:47:20	37.34	39.74	8.07851	-38.0632	-40.5097
2012-12-16 19:57:20	37.45	39.85	8.08545	-38.1753	-40.6218
2012-12-16 20:07:20	37.53	39.94	8.0924	-38.2569	-40.7136
2012-12-16 20:17:20	37.61	40.01	8.09934	-38.3384	-40.7849
2012-12-16 20:27:20	37.71	40.11	8.10628	-38.4404	-40.8869	2012-12-16 20:27:20
2012-12-16 20:37:20	37.81	40.21	8.11323	-38.5423	-40.9888
2012-12-16 20:47:20	37.91	40.31	8.12017	-38.6442	-41.0907
2012-12-16 20:57:20	38.01	40.41	8.12712	-38.7462	-41.1927
2012-12-16 21:07:20	38.09	40.49	8.13406	-38.8277	-41.2742
2012-12-16 21:17:20	38.19	40.61	8.14101	-38.9297	-41.3965
2012-12-16 21:27:20	38.3	40.71	8.14795	-39.0418	-41.4985	2012-12-16 21:27:20
2012-12-16 21:37:20	38.39	40.79	8.1549	-39.1335	-41.58
2012-12-16 21:47:20	38.5	40.9	8.16184	-39.2457	-41.6922
2012-12-16 21:57:20	38.6	41	8.16878	-39.3476	-41.7941
2012-12-16 22:07:20	38.7	41.11	8.17573	-39.4495	-41.9062
2012-12-16 22:17:20	38.79	41.18	8.18267	-39.5413	-41.9776
2012-12-16 22:27:20	38.87	41.26	8.18962	-39.6228	-42.0591	2012-12-16 22:27:20
2012-12-16 22:37:20	38.95	41.36	8.19656	-39.7044	-42.1611
2012-12-16 22:47:20	39.03	41.45	8.20351	-39.7859	-42.2528
2012-12-16 22:57:20	39.17	41.56	8.21045	-39.9286	-42.3649
2012-12-16 23:07:20	39.27	41.66	8.2174	-40.0306	-42.4669
2012-12-16 23:17:20	39.36	41.76	8.22434	-40.1223	-42.5688
2012-12-16 23:27:20	39.47	41.89	8.23128	-40.2345	-42.7013	2012-12-16 23:27:20
2012-12-16 23:37:20	39.6	42	8.23823	-40.367	-42.8135
2012-12-16 23:47:20	39.68	42.09	8.24517	-40.4485	-42.9052
2012-12-16 23:57:20	39.77	42.19	8.25212	-40.5403	-43.0071
2012-12-17 00:07:20	39.86	42.27	8.25906	-40.632	-43.0887
2012-12-17 00:17:20	40	42.4	8.26601	-40.7747	-43.2212
2012-12-17 00:27:20	40.09	42.5	8.27295	-40.8665	-43.3231	2012-12-17 00:27:20
2012-12-17 00:37:20	40.19	42.61	8.2799	-40.9684	-43.4353
2012-12-17 00:47:20	40.28	42.71	8.28684	-41.0601	-43.5372
2012-12-17 00:57:20	40.42	42.8	8.29378	-41.2029	-43.629
2012-12-17 01:07:20	40.51	42.92	8.30073	-41.2946	-43.7513
2012-12-17 01:17:20	40.6	43.03	8.30767	-41.3863	-43.8634
2012-12-17 01:27:20	40.73	43.13	8.31462	-41.5189	-43.9653	2012-12-17 01:27:20
2012-12-17 01:37:20	40.82	43.24	8.32156	-41.6106	-44.0775
2012-12-17 01:47:20	40.93	43.34	8.32851	-41.7227	-44.1794
2012-12-17 01:57:20	41.03	43.44	8.33545	-41.8247	-44.2813
2012-12-17 02:07:20	41.15	43.56	8.3424	-41.947	-44.4037
2012-12-17 02:17:20	41.25	43.65	8.34934	-42.0489	-44.4954
2012-12-17 02:27:20	41.34	43.76	8.35628	-42.1407	-44.6075	2012-12-17 02:27:20
2012-12-17 02:37:20	41.45	43.88	8.36323	-42.2528	-44.7299
2012-12-17 02:47:20	41.57	43.99	8.37017	-42.3751	-44.842
2012-12-17 02:57:20	41.69	44.11	8.37712	-42.4975	-44.9643
2012-12-17 03:07:20	41.81	44.22	8.38406	-42.6198	-45.0765
2012-12-17 03:17:20	41.9	44.34	8.39101	-42.7115	-45.1988
2012-12-17 03:27:20	42.02	44.44	8.39795	-42.8338	-45.3007	2012-12-17 03:27:20
2012-12-17 03:37:20	42.15	44.57	8.4049	-42.9664	-45.4332
2012-12-17 03:47:20	42.24	44.68	8.41184	-43.0581	-45.5454
2012-12-17 03:57:20	42.35	44.77	8.41878	-43.1702	-45.6371
2012-12-17 04:07:20	42.43	44.88	8.42573	-43.2518	-45.7492
2012-12-17 04:17:20	42.57	44.98	8.43267	-43.3945	-45.8512
2012-12-17 04:27:20	42.67	45.1	8.43962	-43.4964	-45.9735	2012-12-17 04:27:20
2012-12-17 04:37:20	42.78	45.21	8.44656	-43.6086	-46.0856
2012-12-17 04:47:20	42.88	45.32	8.45351	-43.7105	-46.1978
2012-12-17 04:57:20	43	45.43	8.46045	-43.8328	-46.3099
2012-12-17 05:07:20	43.1	45.53	8.4674	-43.9348	-46.4118
2012-12-17 05:17:20	43.19	45.64	8.47434	-44.0265	-46.524
2012-12-17 05:27:20	43.33	45.78	8.48128	-44.1692	-46.6667	2012-12-17 05:27:20
2012-12-17 05:37:20	43.46	45.89	8.48823	-44.3017	-46.7788
2012-12-17 05:47:20	43.51	45.94	8.49517	-44.3527	-46.8298
2012-12-17 05:57:20	43.63	46.08	8.50212	-44.475	-46.9725
2012-12-17 06:07:20	43.75	46.18	8.50906	-44.5973	-47.0744
2012-12-17 06:17:20	43.86	46.31	8.51601	-44.7095	-47.2069
2012-12-17 06:27:20	43.99	46.44	8.52295	-44.842	-47.3394	2012-12-17 06:27:20
2012-12-17 06:37:20	44.11	46.57	8.5299	-44.9643	-47.472
2012-12-17 06:47:20	44.22	46.69	8.53684	-45.0765	-47.5943
2012-12-17 06:57:20	44.36	46.81	8.54378	-45.2192	-47.7166
2012-12-17 07:07:20	44.44	46.89	8.55073	-45.3007	-47.7982
2012-12-17 07:17:20	44.58	47.05	8.55767	-45.4434	-47.9613
2012-12-17 07:27:20	44.69	47.16	8.56462	-45.5556	-48.0734	2012-12-17 07:27:20
2012-12-17 07:37:20	44.81	47.28	8.57156	-45.6779	-48.1957
2012-12-17 07:47:20	44.94	47.4	8.57851	-45.8104	-48.318
2012-12-17 07:57:20	45.07	47.54	8.58545	-45.9429	-48.4608
2012-12-17 08:07:20	45.2	47.67	8.5924	-46.0754	-48.5933
2012-12-17 08:17:20	45.31	47.79	8.59934	-46.1876	-48.7156
2012-12-17 08:27:20	45.44	47.91	8.60628	-46.3201	-48.8379	2012-12-17 08:27:20
2012-12-17 08:37:20	45.59	48.03	8.61323	-46.473	-48.9602
2012-12-17 08:47:20	45.7	48.17	8.62017	-46.5851	-49.103
2012-12-17 08:57:20	45.84	48.3	8.62712	-46.7278	-49.2355
2012-12-17 09:07:20	45.94	48.42	8.63406	-46.8298	-49.3578
2012-12-17 09:17:20	46.1	48.59	8.64101	-46.9929	-49.5311
2012-12-17 09:27:20	46.21	48.73	8.64795	-47.105	-49.6738	2012-12-17 09:27:20
2012-12-17 09:37:20	46.37	48.87	8.6549	-47.2681	-49.8165
2012-12-17 09:47:20	46.49	49	8.66184	-47.3904	-49.949
2012-12-17 09:57:20	46.64	49.12	8.66878	-47.5433	-50.0714
2012-12-17 10:07:20	46.77	49.27	8.67573	-47.6758	-50.2243
2012-12-17 10:17:20	46.88	49.41	8.68267	-47.788	-50.367
2012-12-17 10:27:20	47.04	49.53	8.68962	-47.9511	-50.4893	2012-12-17 10:27:20
2012-12-17 10:37:20	47.21	49.69	8.69656	-48.1244	-50.6524
2012-12-17 10:47:20	47.33	49.81	8.70351	-48.2467	-50.7747
2012-12-17 10:57:20	47.48	49.96	8.71045	-48.3996	-50.9276
2012-12-17 11:07:20	47.61	50.09	8.7174	-48.5321	-51.0601
2012-12-17 11:17:20	47.73	50.25	8.72434	-48.6544	-51.2232
2012-12-17 11:27:20	47.77	50.25	8.73128	-48.6952	-51.2232	2012-12-17 11:27:20
2012-12-17 11:37:20	47.98	50.45	8.73823	-48.9093	-51.4271
2012-12-17 11:47:20	48.14	50.61	8.74517	-49.0724	-51.5902
2012-12-17 11:57:20	48.33	50.8	8.75212	-49.2661	-51.7839
2012-12-17 12:07:20	48.5	50.96	8.75906	-49.4393	-51.947
2012-12-17 12:17:20	48.69	51.14	8.76601	-49.633	-52.1305
2012-12-17 12:27:20	48.88	51.34	8.77295	-49.8267	-52.3344	2012-12-17 12:27:20
2012-12-17 12:37:20	49.06	51.51	8.7799	-50.0102	-52.5076
2012-12-17 12:47:20	49.24	51.69	8.78684	-50.1937	-52.6911
2012-12-17 12:57:20	49.41	51.88	8.79378	-50.367	-52.8848
2012-12-17 13:07:20	49.57	52.06	8.80073	-50.5301	-53.0683
2012-12-17 13:17:20	49.75	52.23	8.80767	-50.7136	-53.2416
2012-12-17 13:27:20	49.9	52.36	8.81462	-50.8665	-53.3741	2012-12-17 13:27:20
2012-12-17 13:37:20	50.08	52.56	8.82156	-51.0499	-53.578
2012-12-17 13:47:20	50.22	52.68	8.82851	-51.1927	-53.7003
2012-12-17 13:57:20	50.37	52.85	8.83545	-51.3456	-53.8736
2012-12-17 14:07:20	50.51	52.98	8.8424	-51.4883	-54.0061
2012-12-17 14:17:20	50.67	53.15	8.84934	-51.6514	-54.1794
2012-12-17 14:27:20	50.81	53.29	8.85628	-51.7941	-54.3221	2012-12-17 14:27:20
2012-12-17 14:37:20	50.97	53.46	8.86323	-51.9572	-54.4954
2012-12-17 14:47:20	51.1	53.61	8.87017	-52.0897	-54.6483
2012-12-17 14:57:20	51.25	53.75	8.87712	-52.2426	-54.791
2012-12-17 15:07:20	51.4	53.87	8.88406	-52.3955	-54.9134
2012-12-17 15:17:20	51.54	54.02	8.89101	-52.5382	-55.0663
2012-12-17 15:27:20	51.72	54.2	8.89795	-52.7217	-55.2497	2012-12-17 15:27:20
2012-12-17 15:37:20	51.88	54.37	8.9049	-52.8848	-55.423
2012-12-17 15:47:20	52.07	54.56	8.91184	-53.0785	-55.6167
2012-12-17 15:57:20	52.31	54.77	8.91878	-53.3231	-55.8308
2012-12-17 16:07:20	52.48	54.94	8.92573	-53.4964	-56.0041
2012-12-17 16:17:20	52.67	55.14	8.93267	-53.6901	-56.208
2012-12-17 16:27:20	52.84	55.33	8.93962	-53.8634	-56.4016	2012-12-17 16:27:20
2012-12-17 16:37:20	53.01	55.5	8.94656	-54.0367	-56.5749
2012-12-17 16:47:20	53.21	55.69	8.95351	-54.2406	-56.7686
2012-12-17 16:57:20	53.43	55.91	8.96045	-54.4648	-56.9929
2012-12-17 17:07:20	53.62	56.09	8.9674	-54.6585	-57.1764
2012-12-17 17:17:20	53.83	56.31	8.97434	-54.8726	-57.4006
2012-12-17 17:27:20	53.99	56.48	8.98128	-55.0357	-57.5739	2012-12-17 17:27:20
2012-12-17 17:37:20	54.21	56.7	8.98823	-55.2599	-57.7982
2012-12-17 17:47:20	54.41	56.89	8.99517	-55.4638	-57.9918
2012-12-17 17:57:20	54.59	57.08	9.00212	-55.6473	-58.1855
2012-12-17 18:07:20	54.75	57.26	9.00906	-55.8104	-58.369
2012-12-17 18:17:20	54.96	57.45	9.01601	-56.0245	-58.5627
2012-12-17 18:27:20	55.15	57.66	9.02295	-56.2181	-58.7768	2012-12-17 18:27:20
2012-12-17 18:37:20	55.35	57.87	9.0299	-56.422	-58.9908
2012-12-17 18:47:20	55.57	58.06	9.03684	-56.6463	-59.1845
2012-12-17 18:57:20	55.74	58.25	9.04378	-56.8196	-59.3782
2012-12-17 19:07:20	55.94	58.46	9.05073	-57.0234	-59.5923
2012-12-17 19:17:20	56.16	58.67	9.05767	-57.2477	-59.8063
2012-12-17 19:27:20	56.35	58.87	9.06462	-57.4414	-60.0102	2012-12-17 19:27:20
2012-12-17 19:37:20	56.58	59.07	9.07156	-57.6758	-60.2141
2012-12-17 19:47:20	56.81	59.32	9.07851	-57.9103	-60.4689
2012-12-17 19:57:20	57.03	59.53	9.08545	-58.1346	-60.683
2012-12-17 20:07:20	57.17	59.68	9.0924	-58.2773	-60.8359
2012-12-17 20:17:20	57.38	59.9	9.09934	-58.4913	-61.0601
2012-12-17 20:27:20	57.61	60.13	9.10628	-58.7258	-61.2946	2012-12-17 20:27:20
2012-12-17 20:37:20	57.84	60.36	9.11323	-58.9602	-61.5291
2012-12-17 20:47:20	58.08	60.6	9.12017	-59.2049	-61.7737
2012-12-17 20:57:20	58.26	60.78	9.12712	-59.3884	-61.9572
2012-12-17 21:07:20	58.47	61.01	9.13406	-59.6024	-62.1916
2012-12-17 21:17:20	58.72	61.23	9.14101	-59.8573	-62.4159
2012-12-17 21:27:20	58.94	61.46	9.14795	-60.0815	-62.6504	2012-12-17 21:27:20
2012-12-17 21:37:20	59.16	61.68	9.1549	-60.3058	-62.8746
2012-12-17 21:47:20	59.37	61.91	9.16184	-60.5199	-63.1091
2012-12-17 21:57:20	59.61	62.14	9.16878	-60.7645	-63.3435
2012-12-17 22:07:20	59.85	62.4	9.17573	-61.0092	-63.6086
2012-12-17 22:17:20	60.11	62.63	9.18267	-61.2742	-63.843
2012-12-17 22:27:20	60.3	62.84	9.18962	-61.4679	-64.0571	2012-12-17 22:27:20
2012-12-17 22:37:20	60.52	63.07	9.19656	-61.6922	-64.2915
2012-12-17 22:47:20	60.74	63.3	9.20351	-61.9164	-64.526
2012-12-17 22:57:20	60.99	63.52	9.21045	-62.1713	-64.7503
2012-12-17 23:07:20	61.2	63.76	9.2174	-62.3853	-64.9949
2012-12-17 23:17:20	61.47	63.99	9.22434	-62.6606	-65.2294
2012-12-17 23:27:20	61.69	64.24	9.23128	-62.8848	-65.4842	2012-12-17 23:27:20
2012-12-17 23:37:20	61.94	64.48	9.23823	-63.1397	-65.7288
2012-12-17 23:47:20	62.19	64.74	9.24517	-63.3945	-65.9939
2012-12-17 23:57:20	62.38	64.96	9.25212	-63.5882	-66.2181
2012-12-18 00:07:20	62.64	65.2	9.25906	-63.8532	-66.4628
2012-12-18 00:17:20	62.89	65.46	9.26601	-64.1081	-66.7278
2012-12-18 00:27:20	63.12	65.7	9.27295	-64.3425	-66.9725	2012-12-18 00:27:20
2012-12-18 00:37:20	63.36	65.95	9.2799	-64.5872	-67.2273
2012-12-18 00:47:20	63.61	66.18	9.28684	-64.842	-67.4618
2012-12-18 00:57:20	63.84	66.43	9.29378	-65.0765	-67.7166
2012-12-18 01:07:20	64.12	66.7	9.30073	-65.3619	-67.9918
2012-12-18 01:17:20	64.34	66.93	9.30767	-65.5861	-68.2263
2012-12-18 01:27:20	64.58	67.13	9.31462	-65.8308	-68.4302	2012-12-18 01:27:20
2012-12-18 01:37:20	64.81	67.4	9.32156	-66.0652	-68.7054
2012-12-18 01:47:20	65.07	67.63	9.32851	-66.3303	-68.9399
2012-12-18 01:57:20	65.32	67.88	9.33545	-66.5851	-69.1947
2012-12-18 02:07:20	65.57	68.15	9.3424	-66.84	-69.4699
2012-12-18 02:17:20	65.83	68.41	9.34934	-67.105	-69.735
2012-12-18 02:27:20	66.08	68.66	9.35628	-67.3598	-69.9898	2012-12-18 02:27:20
2012-12-18 02:37:20	66.32	68.91	9.36323	-67.6045	-70.2446
2012-12-18 02:47:20	66.55	69.16	9.37017	-67.8389	-70.4995
2012-12-18 02:57:20	66.86	69.46	9.37712	-68.1549	-70.8053
2012-12-18 03:07:20	67.09	69.68	9.38406	-68.3894	-71.0296
2012-12-18 03:17:20	67.37	69.94	9.39101	-68.6748	-71.2946
2012-12-18 03:27:20	67.56	70.15	9.39795	-68.8685	-71.5087	2012-12-18 03:27:20
2012-12-18 03:37:20	67.83	70.44	9.4049	-69.1437	-71.8043
2012-12-18 03:47:20	68.08	70.69	9.41184	-69.3986	-72.0591
2012-12-18 03:57:20	68.35	70.96	9.41878	-69.6738	-72.3344
2012-12-18 04:07:20	68.62	71.22	9.42573	-69.949	-72.5994
2012-12-18 04:17:20	68.85	71.49	9.43267	-70.1835	-72.8746
2012-12-18 04:27:20	69.16	71.76	9.43962	-70.4995	-73.1498	2012-12-18 04:27:20
2012-12-18 04:37:20	69.41	72.05	9.44656	-70.7543	-73.4455
2012-12-18 04:47:20	69.68	72.3	9.45351	-71.0296	-73.7003
2012-12-18 04:57:20	69.92	72.56	9.46045	-71.2742	-73.9653
2012-12-18 05:07:20	70.2	72.82	9.4674	-71.5596	-74.2304
2012-12-18 05:17:20	70.45	73.12	9.47434	-71.8145	-74.5362
2012-12-18 05:27:20	70.75	73.39	9.48128	-72.1203	-74.8114	2012-12-18 05:27:20
2012-12-18 05:37:20	71.03	73.66	9.48823	-72.4057	-75.0866
2012-12-18 05:47:20	71.29	73.93	9.49517	-72.6707	-75.3619
2012-12-18 05:57:20	71.5	74.16	9.50212	-72.8848	-75.5963
2012-12-18 06:07:20	71.8	74.43	9.50906	-73.1906	-75.8716
2012-12-18 06:17:20	72.05	74.69	9.51601	-73.4455	-76.1366
2012-12-18 06:27:20	72.32	74.93	9.52295	-73.7207	-76.3812	2012-12-18 06:27:20
2012-12-18 06:37:20	72.55	75.17	9.5299	-73.9551	-76.6259
2012-12-18 06:47:20	72.82	75.47	9.53684	-74.2304	-76.9317
2012-12-18 06:57:20	73.07	75.73	9.54378	-74.4852	-77.1967
2012-12-18 07:07:20	73.34	75.99	9.55073	-74.7604	-77.4618
2012-12-18 07:17:20	73.59	76.26	9.55767	-75.0153	-77.737
2012-12-18 07:27:20	73.88	76.54	9.56462	-75.3109	-78.0224	2012-12-18 07:27:20
2012-12-18 07:37:20	74.13	76.8	9.57156	-75.5657	-78.2875
2012-12-18 07:47:20	74.43	77.1	9.57851	-75.8716	-78.5933
2012-12-18 07:57:20	74.66	77.31	9.58545	-76.106	-78.8073
2012-12-18 08:07:20	74.92	77.6	9.5924	-76.371	-79.103
2012-12-18 08:17:20	75.06	77.9	9.59934	-76.5138	-79.4088
2012-12-18 08:27:20	75.47	78.18	9.60628	-76.9317	-79.6942	2012-12-18 08:27:20
2012-12-18 08:37:20	75.73	78.43	9.61323	-77.1967	-79.949
2012-12-18 08:47:20	76.01	78.69	9.62017	-77.4822	-80.2141
2012-12-18 08:57:20	76.25	78.9	9.62712	-77.7268	-80.4281
2012-12-18 09:07:20	76.45	79.18	9.63406	-77.9307	-80.7136
2012-12-18 09:17:20	76.73	79.44	9.64101	-78.2161	-80.9786
2012-12-18 09:27:20	76.96	79.67	9.64795	-78.4506	-81.213	2012-12-18 09:27:20
2012-12-18 09:37:20	77.22	79.92	9.6549	-78.7156	-81.4679
2012-12-18 09:47:20	77.49	80.2	9.66184	-78.9908	-81.7533
2012-12-18 09:57:20	77.75	80.4	9.66878	-79.2559	-81.9572
2012-12-18 10:07:20	77.98	80.71	9.67573	-79.4903	-82.2732
2012-12-18 10:17:20	78.26	80.93	9.68267	-79.7757	-82.4975
2012-12-18 10:27:20	78.52	81.24	9.68962	-80.0408	-82.8135	2012-12-18 10:27:20
2012-12-18 10:37:20	78.82	81.55	9.69656	-80.3466	-83.1295
2012-12-18 10:47:20	79.09	81.82	9.70351	-80.6218	-83.4047
2012-12-18 10:57:20	79.36	82.07	9.71045	-80.897	-83.6595
2012-12-18 11:07:20	79.63	82.34	9.7174	-81.1723	-83.9348
2012-12-18 11:17:20	79.92	82.61	9.72434	-81.4679	-84.21
2012-12-18 11:27:20	80.17	82.88	9.73128	-81.7227	-84.4852	2012-12-18 11:27:20
2012-12-18 11:37:20	80.44	83.17	9.73823	-81.998	-84.7808
2012-12-18 11:47:20	80.7	83.45	9.74517	-82.263	-85.0663
2012-12-18 11:57:20	80.92	83.69	9.75212	-82.4873	-85.3109
2012-12-18 12:07:20	81.21	83.91	9.75906	-82.7829	-85.5352
2012-12-18 12:17:20	81.47	84.2	9.76601	-83.0479	-85.8308
2012-12-18 12:27:20	81.75	84.48	9.77295	-83.3333	-86.1162	2012-12-18 12:27:20
2012-12-18 12:37:20	82.04	84.75	9.7799	-83.629	-86.3914
2012-12-18 12:47:20	82.3	85.06	9.78684	-83.894	-86.7074
2012-12-18 12:57:20	82.62	85.38	9.79378	-84.2202	-87.0336
2012-12-18 13:07:20	82.88	85.6	9.80073	-84.4852	-87.2579
2012-12-18 13:17:20	83.18	85.89	9.80767	-84.791	-87.5535
2012-12-18 13:27:20	83.47	86.2	9.81462	-85.0866	-87.8695	2012-12-18 13:27:20
2012-12-18 13:37:20	83.71	86.48	9.82156	-85.3313	-88.1549
2012-12-18 13:47:20	84	86.81	9.82851	-85.6269	-88.4913
2012-12-18 13:57:20	84.34	87.11	9.83545	-85.9735	-88.7971
2012-12-18 14:07:20	84.62	87.38	9.8424	-86.2589	-89.0724
2012-12-18 14:17:20	84.9	87.69	9.84934	-86.5443	-89.3884
2012-12-18 14:27:20	85.15	87.98	9.85628	-86.7992	-89.684	2012-12-18 14:27:20
2012-12-18 14:37:20	85.5	88.27	9.86323	-87.156	-89.9796
2012-12-18 14:47:20	85.76	88.56	9.87017	-87.421	-90.2752
2012-12-18 14:57:20	86.04	88.83	9.87712	-87.7064	-90.5505
2012-12-18 15:07:20	86.31	89.12	9.88406	-87.9817	-90.8461
2012-12-18 15:17:20	86.61	89.36	9.89101	-88.2875	-91.0907
2012-12-18 15:27:20	86.87	89.63	9.89795	-88.5525	-91.366	2012-12-18 15:27:20
2012-12-18 15:37:20	87.1	89.91	9.9049	-88.787	-91.6514
2012-12-18 15:47:20	87.41	90.22	9.91184	-89.103	-91.9674
2012-12-18 15:57:20	87.7	90.54	9.91878	-89.3986	-92.2936
2012-12-18 16:07:20	87.97	90.84	9.92573	-89.6738	-92.5994
2012-12-18 16:17:20	88.32	91.16	9.93267	-90.0306	-92.9256
2012-12-18 16:27:20	88.6	91.49	9.93962	-90.316	-93.262	2012-12-18 16:27:20
2012-12-18 16:37:20	88.8	91.64	9.94656	-90.5199	-93.4149
2012-12-18 16:47:20	89.14	91.97	9.95351	-90.8665	-93.7513
2012-12-18 16:57:20	89.39	92.26	9.96045	-91.1213	-94.0469
2012-12-18 17:07:20	89.74	92.57	9.9674	-91.4781	-94.3629
2012-12-18 17:17:20	90.06	92.91	9.97434	-91.8043	-94.7095
2012-12-18 17:27:20	90.39	93.24	9.98128	-92.1407	-95.0459	2012-12-18 17:27:20
2012-12-18 17:37:20	90.72	93.58	9.98823	-92.4771	-95.3925
2012-12-18 17:47:20	90.91	93.86	9.99517	-92.6707	-95.6779
2012-12-18 17:57:20	91.21	94.17	10.0021	-92.9766	-95.9939
2012-12-18 18:07:20	91.62	94.5	10.0091	-93.3945	-96.3303
2012-12-18 18:17:20	91.93	94.79	10.016	-93.7105	-96.6259
2012-12-18 18:27:20	92.24	95.11	10.023	-94.0265	-96.9521	2012-12-18 18:27:20
2012-12-18 18:37:20	92.55	95.45	10.0299	-94.3425	-97.2987
2012-12-18 18:47:20	92.91	95.8	10.0368	-94.7095	-97.6555
2012-12-18 18:57:20	93.24	96.11	10.0438	-95.0459	-97.9715
2012-12-18 19:07:20	93.58	96.48	10.0507	-95.3925	-98.3486
2012-12-18 19:17:20	93.94	96.79	10.0577	-95.7594	-98.6646
2012-12-18 19:27:20	94.31	97.17	10.0646	-96.1366	-99.052	2012-12-18 19:27:20
2012-12-18 19:37:20	94.61	97.48	10.0716	-96.4424	-99.368
2012-12-18 19:47:20	94.95	97.81	10.0785	-96.789	-99.7044
2012-12-18 19:57:20	95.31	98.2	10.0855	-97.156	-100.102
2012-12-18 20:07:20	95.63	98.52	10.0924	-97.4822	-100.428
2012-12-18 20:17:20	95.94	98.84	10.0993	-97.7982	-100.754
2012-12-18 20:27:20	96.32	99.18	10.1063	-98.1855	-101.101	2012-12-18 20:27:20
2012-12-18 20:37:20	96.63	99.52	10.1132	-98.5015	-101.448
2012-12-18 20:47:20	96.97	99.85	10.1202	-98.8481	-101.784
2012-12-18 20:57:20	97.29	100.17	10.1271	-99.1743	-102.11
2012-12-18 21:07:20	97.6	100.46	10.1341	-99.4903	-102.406
2012-12-18 21:17:20	97.86	100.82	10.141	-99.7554	-102.773
2012-12-18 21:27:20	98.24	101.14	10.148	-100.143	-103.099	2012-12-18 21:27:20
2012-12-18 21:37:20	98.55	101.51	10.1549	-100.459	-103.476
2012-12-18 21:47:20	98.92	101.82	10.1618	-100.836	-103.792
2012-12-18 21:57:20	99.21	102.19	10.1688	-101.131	-104.169
2012-12-18 22:07:20	99.47	102.53	10.1757	-101.397	-104.516
2012-12-18 22:17:20	99.93	102.89	10.1827	-101.865	-104.883
2012-12-18 22:27:20	100.28	103.24	10.1896	-102.222	-105.24	2012-12-18 22:27:20
2012-12-18 22:37:20	100.6	103.57	10.1966	-102.548	-105.576
2012-12-18 22:47:20	100.95	103.93	10.2035	-102.905	-105.943
2012-12-18 22:57:20	101.29	104.29	10.2105	-103.252	-106.31
2012-12-18 23:07:20	101.61	104.63	10.2174	-103.578	-106.656
2012-12-18 23:17:20	101.96	104.93	10.2243	-103.935	-106.962
2012-12-18 23:27:20	102.32	105.27	10.2313	-104.302	-107.309	2012-12-18 23:27:20
2012-12-18 23:37:20	102.61	105.61	10.2382	-104.597	-107.655
2012-12-18 23:47:20	102.97	105.95	10.2452	-104.964	-108.002
2012-12-18 23:57:20	103.26	106.27	10.2521	-105.26	-108.328
2012-12-19 00:07:20	103.59	106.6	10.2591	-105.596	-108.665
2012-12-19 00:17:20	103.89	106.92	10.266	-105.902	-108.991
2012-12-19 00:27:20	104.22	107.2	10.273	-106.239	-109.276	2012-12-19 00:27:20
2012-12-19 00:37:20	104.57	107.57	10.2799	-106.595	-109.653
2012-12-19 00:47:20	104.9	107.86	10.2868	-106.932	-109.949
2012-12-19 00:57:20	105.21	108.21	10.2938	-107.248	-110.306
2012-12-19 01:07:20	105.52	108.59	10.3007	-107.564	-110.693
2012-12-19 01:17:20	105.83	108.91	10.3077	-107.88	-111.019
2012-12-19 01:27:20	106.2	109.23	10.3146	-108.257	-111.346	2012-12-19 01:27:20
2012-12-19 01:37:20	106.5	109.57	10.3216	-108.563	-111.692
2012-12-19 01:47:20	106.81	109.9	10.3285	-108.879	-112.029
2012-12-19 01:57:20	107.16	110.24	10.3355	-109.235	-112.375
2012-12-19 02:07:20	107.44	110.53	10.3424	-109.521	-112.671
2012-12-19 02:17:20	107.75	110.84	10.3493	-109.837	-112.987
2012-12-19 02:27:20	108.13	111.21	10.3563	-110.224	-113.364	2012-12-19 02:27:20
2012-12-19 02:37:20	108.46	111.54	10.3632	-110.561	-113.7
2012-12-19 02:47:20	108.8	111.92	10.3702	-110.907	-114.088
2012-12-19 02:57:20	109.08	112.24	10.3771	-111.193	-114.414
2012-12-19 03:07:20	109.33	112.55	10.3841	-111.448	-114.73
2012-12-19 03:17:20	109.72	112.86	10.391	-111.845	-115.046
2012-12-19 03:27:20	110.07	113.2	10.398	-112.202	-115.392	2012-12-19 03:27:20
2012-12-19 03:37:20	110.38	113.55	10.4049	-112.518	-115.749
2012-12-19 03:47:20	110.72	113.89	10.4118	-112.864	-116.096
2012-12-19 03:57:20	111.05	114.25	10.4188	-113.201	-116.463
2012-12-19 04:07:20	111.36	114.53	10.4257	-113.517	-116.748
2012-12-19 04:17:20	111.74	114.92	10.4327	-113.904	-117.146
2012-12-19 04:27:20	112.01	115.24	10.4396	-114.179	-117.472	2012-12-19 04:27:20
2012-12-19 04:37:20	112.36	115.57	10.4466	-114.536	-117.808
2012-12-19 04:47:20	112.71	115.92	10.4535	-114.893	-118.165
2012-12-19 04:57:20	113.09	116.3	10.4605	-115.28	-118.552
2012-12-19 05:07:20	113.44	116.6	10.4674	-115.637	-118.858
2012-12-19 05:17:20	113.78	116.99	10.4743	-115.984	-119.256
2012-12-19 05:27:20	114.11	117.36	10.4813	-116.32	-119.633	2012-12-19 05:27:20
2012-12-19 05:37:20	114.46	117.7	10.4882	-116.677	-119.98
2012-12-19 05:47:20	114.8	118.08	10.4952	-117.023	-120.367
2012-12-19 05:57:20	115.15	118.42	10.5021	-117.38	-120.714
2012-12-19 06:07:20	115.48	118.76	10.5091	-117.717	-121.06
2012-12-19 06:17:20	115.84	119.15	10.516	-118.084	-121.458
2012-12-19 06:27:20	116.14	119.49	10.523	-118.389	-121.804	2012-12-19 06:27:20
2012-12-19 06:37:20	116.47	119.85	10.5299	-118.726	-122.171
2012-12-19 06:47:20	116.88	120.19	10.5368	-119.144	-122.518
2012-12-19 06:57:20	117.23	120.51	10.5438	-119.501	-122.844
2012-12-19 07:07:20	117.57	120.9	10.5507	-119.847	-123.242
2012-12-19 07:17:20	117.91	121.27	10.5577	-120.194	-123.619
2012-12-19 07:27:20	118.26	121.63	10.5646	-120.55	-123.986	2012-12-19 07:27:20
2012-12-19 07:37:20	118.58	121.98	10.5716	-120.877	-124.343
2012-12-19 07:47:20	118.93	122.34	10.5785	-121.233	-124.709
2012-12-19 07:57:20	119.27	122.71	10.5855	-121.58	-125.087
2012-12-19 08:07:20	119.3	123.06	10.5924	-121.611	-125.443
2012-12-19 08:17:20	119.96	123.47	10.5993	-122.283	-125.861
2012-12-19 08:27:20	120.35	123.81	10.6063	-122.681	-126.208	2012-12-19 08:27:20
2012-12-19 08:37:20	120.68	124.25	10.6132	-123.017	-126.656
2012-12-19 08:47:20	121.04	124.61	10.6202	-123.384	-127.023
2012-12-19 08:57:20	121.03	124.97	10.6271	-123.374	-127.39
2012-12-19 09:07:20	121.78	125.34	10.6341	-124.139	-127.768
2012-12-19 09:17:20	122.16	125.15	10.641	-124.526	-127.574
2012-12-19 09:27:20	122.52	126.08	10.648	-124.893	-128.522	2012-12-19 09:27:20
2012-12-19 09:37:20	122.88	126.41	10.6549	-125.26	-128.858
2012-12-19 09:47:20	123.21	126.78	10.6618	-125.596	-129.235
2012-12-19 09:57:20	123.57	127.15	10.6688	-125.963	-129.613
2012-12-19 10:07:20	123.94	127.63	10.6757	-126.34	-130.102
2012-12-19 10:17:20	124.32	127.96	10.6827	-126.728	-130.438
2012-12-19 10:27:20	124.68	128.28	10.6896	-127.095	-130.765	2012-12-19 10:27:20
2012-12-19 10:37:20	125.03	128.67	10.6966	-127.452	-131.162
2012-12-19 10:47:20	125.37	128.99	10.7035	-127.798	-131.488
2012-12-19 10:57:20	125.72	129.37	10.7105	-128.155	-131.876
2012-12-19 11:07:20	126.09	129.76	10.7174	-128.532	-132.273
2012-12-19 11:17:20	126.43	130.12	10.7243	-128.879	-132.64
2012-12-19 11:27:20	126.66	130.46	10.7313	-129.113	-132.987	2012-12-19 11:27:20
2012-12-19 11:37:20	127.08	130.84	10.7382	-129.541	-133.374
2012-12-19 11:47:20	127.46	131.19	10.7452	-129.929	-133.731
2012-12-19 11:57:20	127.82	131.59	10.7521	-130.296	-134.139
2012-12-19 12:07:20	128.23	132	10.7591	-130.714	-134.557
2012-12-19 12:17:20	128.59	132.32	10.766	-131.081	-134.883
2012-12-19 12:27:20	128.95	132.69	10.773	-131.448	-135.26	2012-12-19 12:27:20
2012-12-19 12:37:20	129.27	133.03	10.7799	-131.774	-135.607
2012-12-19 12:47:20	129.6	133.36	10.7868	-132.11	-135.943
2012-12-19 12:57:20	129.98	133.69	10.7938	-132.497	-136.279
2012-12-19 13:07:20	130.31	134.09	10.8007	-132.834	-136.687
2012-12-19 13:17:20	130.65	134.44	10.8077	-133.18	-137.044
2012-12-19 13:27:20	131	134.78	10.8146	-133.537	-137.39	2012-12-19 13:27:20
2012-12-19 13:37:20	131.35	135.16	10.8216	-133.894	-137.778
2012-12-19 13:47:20	131.65	135.52	10.8285	-134.2	-138.145
2012-12-19 13:57:20	132.02	135.88	10.8355	-134.577	-138.512
2012-12-19 14:07:20	132.37	136.23	10.8424	-134.934	-138.869
2012-12-19 14:17:20	132.69	136.6	10.8493	-135.26	-139.246
2012-12-19 14:27:20	132.97	136.95	10.8563	-135.545	-139.602	2012-12-19 14:27:20
2012-12-19 14:37:20	133.33	137.28	10.8632	-135.912	-139.939
2012-12-19 14:47:20	133.66	137.64	10.8702	-136.249	-140.306
2012-12-19 14:57:20	134	138.01	10.8771	-136.595	-140.683
2012-12-19 15:07:20	134.31	138.36	10.8841	-136.911	-141.04
2012-12-19 15:17:20	134.65	138.7	10.891	-137.258	-141.386
2012-12-19 15:27:20	134.98	139.06	10.898	-137.594	-141.753	2012-12-19 15:27:20
2012-12-19 15:37:20	135.34	139.37	10.9049	-137.961	-142.069
2012-12-19 15:47:20	135.58	139.69	10.9118	-138.206	-142.396
2012-12-19 15:57:20	135.97	140.04	10.9188	-138.603	-142.752
2012-12-19 16:07:20	136.29	140.28	10.9257	-138.93	-142.997
2012-12-19 16:17:20	136.59	140.65	10.9327	-139.235	-143.374
2012-12-19 16:27:20	136.9	140.99	10.9396	-139.551	-143.721	2012-12-19 16:27:20
2012-12-19 16:37:20	137.26	141.36	10.9466	-139.918	-144.098
2012-12-19 16:47:20	137.08	141.53	10.9535	-139.735	-144.271
2012-12-19 16:57:20	137.8	141.91	10.9605	-140.469	-144.659
2012-12-19 17:07:20	138.11	142.23	10.9674	-140.785	-144.985
2012-12-19 17:17:20	138.47	142.61	10.9743	-141.152	-145.372
2012-12-19 17:27:20	138.81	142.94	10.9813	-141.498	-145.708	2012-12-19 17:27:20
2012-12-19 17:37:20	139.14	143.31	10.9882	-141.835	-146.086
2012-12-19 17:47:20	139.47	143.59	10.9952	-142.171	-146.371
2012-12-19 17:57:20	139.82	143.97	11.0021	-142.528	-146.758
2012-12-19 18:07:20	140.13	144.28	11.0091	-142.844	-147.074
2012-12-19 18:17:20	140.43	144.62	11.016	-143.15	-147.421
2012-12-19 18:27:20	140.77	144.96	11.023	-143.496	-147.768	2012-12-19 18:27:20
2012-12-19 18:37:20	141.08	145.29	11.0299	-143.812	-148.104
2012-12-19 18:47:20	141.41	145.6	11.0368	-144.149	-148.42
2012-12-19 18:57:20	141.71	145.93	11.0438	-144.455	-148.756
2012-12-19 19:07:20	142.04	146.26	11.0507	-144.791	-149.093
2012-12-19 19:17:20	142.35	146.55	11.0577	-145.107	-149.388
2012-12-19 19:27:20	142.69	146.86	11.0646	-145.454	-149.704	2012-12-19 19:27:20
2012-12-19 19:37:20	142.98	147.17	11.0716	-145.749	-150.02
2012-12-19 19:47:20	143.29	147.52	11.0785	-146.065	-150.377
2012-12-19 19:57:20	143.61	147.83	11.0855	-146.391	-150.693
2012-12-19 20:07:20	143.93	148.15	11.0924	-146.718	-151.019
2012-12-19 20:17:20	144.21	148.44	11.0993	-147.003	-151.315
2012-12-19 20:27:20	144.49	148.75	11.1063	-147.288	-151.631	2012-12-19 20:27:20
2012-12-19 20:37:20	144.15	149.03	11.1132	-146.942	-151.916
2012-12-19 20:47:20	145.06	149.32	11.1202	-147.87	-152.212
2012-12-19 20:57:20	145.33	149.57	11.1271	-148.145	-152.467
2012-12-19 21:07:20	145.61	149.88	11.1341	-148.43	-152.783
2012-12-19 21:17:20	145.87	150.12	11.141	-148.695	-153.028
2012-12-19 21:27:20	146.14	150.41	11.148	-148.97	-153.323	2012-12-19 21:27:20
2012-12-19 21:37:20	146.41	150.71	11.1549	-149.246	-153.629
2012-12-19 21:47:20	146.65	150.96	11.1618	-149.49	-153.884
2012-12-19 21:57:20	146.92	151.25	11.1688	-149.766	-154.179
2012-12-19 22:07:20	147.13	151.46	11.1757	-149.98	-154.393
2012-12-19 22:17:20	147.29	151.78	11.1827	-150.143	-154.72
2012-12-19 22:27:20	147.56	152.02	11.1896	-150.418	-154.964	2012-12-19 22:27:20
2012-12-19 22:37:20	147.86	152.28	11.1966	-150.724	-155.229
2012-12-19 22:47:20	148.15	152.54	11.2035	-151.019	-155.494
2012-12-19 22:57:20	148.37	152.81	11.2105	-151.244	-155.77
2012-12-19 23:07:20	148.63	153.09	11.2174	-151.509	-156.055
2012-12-19 23:17:20	148.88	153.34	11.2243	-151.764	-156.31
2012-12-19 23:27:20	149.11	153.57	11.2313	-151.998	-156.544	2012-12-19 23:27:20
2012-12-19 23:37:20	149.34	153.85	11.2382	-152.232	-156.83
2012-12-19 23:47:20	149.57	154.08	11.2452	-152.467	-157.064
2012-12-19 23:57:20	149.83	154.34	11.2521	-152.732	-157.329
2012-12-20 00:07:20	150.02	154.6	11.2591	-152.926	-157.594
2012-12-20 00:17:20	150.26	154.84	11.266	-153.17	-157.839
2012-12-20 00:27:20	150.5	155.1	11.273	-153.415	-158.104	2012-12-20 00:27:20
2012-12-20 00:37:20	150.73	155.32	11.2799	-153.649	-158.328
2012-12-20 00:47:20	150.92	155.59	11.2868	-153.843	-158.603
2012-12-20 00:57:20	151.19	155.81	11.2938	-154.118	-158.828
2012-12-20 01:07:20	151.41	156.06	11.3007	-154.343	-159.083
2012-12-20 01:17:20	151.59	156.32	11.3077	-154.526	-159.348
2012-12-20 01:27:20	151.86	156.54	11.3146	-154.801	-159.572	2012-12-20 01:27:20
2012-12-20 01:37:20	152.05	156.79	11.3216	-154.995	-159.827
2012-12-20 01:47:20	152.29	157.03	11.3285	-155.24	-160.071
2012-12-20 01:57:20	152.48	157.27	11.3355	-155.433	-160.316
2012-12-20 02:07:20	152.71	157.5	11.3424	-155.668	-160.55
2012-12-20 02:17:20	152.92	157.73	11.3493	-155.882	-160.785
2012-12-20 02:27:20	153.14	157.95	11.3563	-156.106	-161.009	2012-12-20 02:27:20
2012-12-20 02:37:20	153.36	158.17	11.3632	-156.33	-161.233
2012-12-20 02:47:20	153.56	158.39	11.3702	-156.534	-161.458
2012-12-20 02:57:20	153.75	158.62	11.3771	-156.728	-161.692
2012-12-20 03:07:20	153.95	158.8	11.3841	-156.932	-161.876
2012-12-20 03:17:20	154.13	159.05	11.391	-157.115	-162.13
2012-12-20 03:27:20	154.34	159.27	11.398	-157.329	-162.355	2012-12-20 03:27:20
2012-12-20 03:37:20	154.52	159.49	11.4049	-157.513	-162.579
2012-12-20 03:47:20	154.74	159.69	11.4118	-157.737	-162.783
2012-12-20 03:57:20	154.93	159.91	11.4188	-157.931	-163.007
2012-12-20 04:07:20	155.11	160.12	11.4257	-158.114	-163.221
2012-12-20 04:17:20	155.32	160.32	11.4327	-158.328	-163.425
2012-12-20 04:27:20	155.5	160.53	11.4396	-158.512	-163.639	2012-12-20 04:27:20
2012-12-20 04:37:20	155.69	160.74	11.4466	-158.705	-163.853
2012-12-20 04:47:20	155.86	160.92	11.4535	-158.879	-164.037
2012-12-20 04:57:20	156.05	161.12	11.4605	-159.072	-164.241
2012-12-20 05:07:20	156.23	161.33	11.4674	-159.256	-164.455
2012-12-20 05:17:20	156.41	161.48	11.4743	-159.439	-164.608
2012-12-20 05:27:20	156.58	161.68	11.4813	-159.613	-164.811	2012-12-20 05:27:20
2012-12-20 05:37:20	156.74	161.86	11.4882	-159.776	-164.995
2012-12-20 05:47:20	156.93	162.06	11.4952	-159.969	-165.199
2012-12-20 05:57:20	157.04	162.24	11.5021	-160.082	-165.382
2012-12-20 06:07:20	157.21	162.41	11.5091	-160.255	-165.556
2012-12-20 06:17:20	157.4	162.62	11.516	-160.449	-165.77
2012-12-20 06:27:20	157.59	162.79	11.523	-160.642	-165.943	2012-12-20 06:27:20
2012-12-20 06:37:20	157.73	162.95	11.5299	-160.785	-166.106
2012-12-20 06:47:20	157.87	163.12	11.5368	-160.928	-166.279
2012-12-20 06:57:20	158.03	163.3	11.5438	-161.091	-166.463
2012-12-20 07:07:20	158.19	163.47	11.5507	-161.254	-166.636
2012-12-20 07:17:20	158.35	163.61	11.5577	-161.417	-166.779
2012-12-20 07:27:20	158.48	163.84	11.5646	-161.549	-167.013	2012-12-20 07:27:20
2012-12-20 07:37:20	158.62	164.01	11.5716	-161.692	-167.187
2012-12-20 07:47:20	158.74	164.18	11.5785	-161.814	-167.36
2012-12-20 07:57:20	158.87	164.36	11.5855	-161.947	-167.543
2012-12-20 08:07:20	158.98	164.51	11.5924	-162.059	-167.696
2012-12-20 08:17:20	159.12	164.72	11.5993	-162.202	-167.91
2012-12-20 08:37:20	159.24	165.05	11.6132	-162.324	-168.247	2012-12-20 08:37:20
2012-12-20 08:47:20	159.42	165.21	11.6202	-162.508	-168.41
2012-12-20 08:57:20	159.53	165.37	11.6271	-162.62	-168.573
2012-12-20 09:07:20	159.69	165.53	11.6341	-162.783	-168.736
2012-12-20 09:17:20	159.84	165.67	11.641	-162.936	-168.879
2012-12-20 09:27:20	159.96	165.85	11.648	-163.058	-169.062
2012-12-20 09:37:20	160.13	166.01	11.6549	-163.231	-169.225	2012-12-20 09:37:20
2012-12-20 09:47:20	160.26	166.15	11.6618	-163.364	-169.368
2012-12-20 09:57:20	160.29	166.31	11.6688	-163.394	-169.531
2012-12-20 10:07:20	160.53	166.46	11.6757	-163.639	-169.684
2012-12-20 10:17:20	160.7	166.6	11.6827	-163.812	-169.827
2012-12-20 10:27:20	160.83	166.73	11.6896	-163.945	-169.959
2012-12-20 10:37:20	160.97	166.88	11.6966	-164.088	-170.112	2012-12-20 10:37:20
2012-12-20 10:47:20	161.07	167.01	11.7035	-164.19	-170.245
2012-12-20 10:57:20	161.17	167.14	11.7105	-164.292	-170.377
2012-12-20 11:07:20	161.23	167.26	11.7174	-164.353	-170.499
2012-12-20 11:17:20	161.36	167.37	11.7243	-164.485	-170.612
2012-12-20 11:27:20	161.45	167.49	11.7313	-164.577	-170.734
2012-12-20 11:37:20	161.09	167.56	11.7382	-164.21	-170.805	2012-12-20 11:37:20
2012-12-20 11:47:20	161.59	167.7	11.7452	-164.72	-170.948
2012-12-20 11:57:20	161.65	167.8	11.7521	-164.781	-171.05
2012-12-20 12:07:20	161.68	167.86	11.7591	-164.811	-171.111
2012-12-20 12:17:20	161.76	167.95	11.766	-164.893	-171.203
2012-12-20 12:27:20	161.82	168.03	11.773	-164.954	-171.284
2012-12-20 12:37:20	161.73	168.06	11.7799	-164.862	-171.315	2012-12-20 12:37:20
2012-12-20 12:47:20	161.95	168.23	11.7868	-165.087	-171.488
2012-12-20 12:57:20	162.13	168.35	11.7938	-165.27	-171.611
2012-12-20 13:07:20	162.29	168.55	11.8007	-165.433	-171.814
2012-12-20 13:17:20	162.43	168.69	11.8077	-165.576	-171.957
2012-12-20 13:27:20	162.62	168.86	11.8146	-165.77	-172.13
2012-12-20 13:37:20	162.77	168.95	11.8216	-165.923	-172.222	2012-12-20 13:37:20
2012-12-20 13:47:20	162.92	169.16	11.8285	-166.075	-172.436
2012-12-20 13:57:20	163.09	169.3	11.8355	-166.249	-172.579
2012-12-20 14:07:20	163.23	169.44	11.8424	-166.391	-172.722
2012-12-20 14:17:20	163.4	169.57	11.8493	-166.565	-172.854
2012-12-20 14:27:20	163.52	169.71	11.8563	-166.687	-172.997
2012-12-20 14:37:20	163.66	169.83	11.8632	-166.83	-173.119	2012-12-20 14:37:20
2012-12-20 14:47:20	163.81	169.98	11.8702	-166.983	-173.272
2012-12-20 14:57:20	163.97	170.1	11.8771	-167.146	-173.394
2012-12-20 15:07:20	164.09	170.21	11.8841	-167.268	-173.507
2012-12-20 15:17:20	164.16	170.34	11.891	-167.339	-173.639
2012-12-20 15:27:20	164.3	170.47	11.898	-167.482	-173.772
2012-12-20 15:37:20	164.43	170.56	11.9049	-167.615	-173.863	2012-12-20 15:37:20
2012-12-20 15:47:20	164.54	170.68	11.9118	-167.727	-173.986
2012-12-20 15:57:20	164.62	170.82	11.9188	-167.808	-174.128
2012-12-20 16:07:20	164.78	170.94	11.9257	-167.971	-174.251
2012-12-20 16:17:20	164.92	171.08	11.9327	-168.114	-174.393
2012-12-20 16:27:20	165.06	171.2	11.9396	-168.257	-174.516
2012-12-20 16:37:20	165.17	171.35	11.9466	-168.369	-174.669	2012-12-20 16:37:20
2012-12-20 16:47:20	165.19	171.4	11.9535	-168.389	-174.72
2012-12-20 16:57:20	165.4	171.55	11.9605	-168.603	-174.873
2012-12-20 17:07:20	165.52	171.65	11.9674	-168.726	-174.975
2012-12-20 17:17:20	165.6	171.79	11.9743	-168.807	-175.117
2012-12-20 17:27:20	164.54	171.35	11.9813	-167.727	-174.669
2012-12-20 17:37:20	165.73	171.96	11.9882	-168.94	-175.291	2012-12-20 17:37:20
2012-12-20 17:47:20	165.86	172.08	11.9952	-169.072	-175.413
2012-12-20 17:57:20	165.98	172.18	12.0021	-169.195	-175.515
2012-12-20 18:07:20	166.12	172.26	12.0091	-169.337	-175.596
2012-12-20 18:17:20	166.24	172.37	12.016	-169.46	-175.708
2012-12-20 18:27:20	166.36	172.51	12.023	-169.582	-175.851
2012-12-20 18:37:20	166.46	172.61	12.0299	-169.684	-175.953	2012-12-20 18:37:20
2012-12-20 18:47:20	166.58	172.71	12.0368	-169.806	-176.055
2012-12-20 18:57:20	166.67	172.81	12.0438	-169.898	-176.157
2012-12-21 08:20:05	169.98	176.56	12.6012	-173.272	-179.98
2012-12-21 08:21:05	170.78	177.1	12.6019	-174.088	-180.53
2012-12-21 08:22:05	171.33	177.36	12.6026	-174.648	-180.795
2012-12-21 08:23:05	171.76	177.81	12.6033	-175.087	-181.254	2012-12-21 08:23:05
2012-12-21 08:24:05	172.11	178.15	12.604	-175.443	-181.6
2012-12-21 08:25:05	172.39	178.41	12.6047	-175.729	-181.865
2012-12-21 08:26:05	172.63	178.72	12.6054	-175.973	-182.181
2012-12-21 08:27:05	172.82	178.94	12.6061	-176.167	-182.406
2012-12-21 08:28:05	172.99	179.12	12.6068	-176.34	-182.589
2012-12-21 08:29:05	173.15	179.28	12.6075	-176.504	-182.752	2012-12-21 08:29:05
2012-12-21 08:30:05	173.29	179.49	12.6082	-176.646	-182.966
2012-12-21 08:31:05	173.41	179.65	12.6089	-176.769	-183.129
2012-12-21 08:32:05	173.53	179.8	12.6096	-176.891	-183.282
2012-12-21 08:33:05	173.62	179.94	12.6103	-176.983	-183.425
2012-12-21 08:34:05	173.7	180.03	12.611	-177.064	-183.517
2012-12-21 08:35:05	173.78	180.13	12.6117	-177.146	-183.619	2012-12-21 08:35:05
2012-12-21 08:36:05	173.85	180.19	12.6124	-177.217	-183.68
2012-12-21 08:37:05	173.9	180.25	12.6131	-177.268	-183.741
2012-12-21 08:38:05	173.96	180.27	12.6138	-177.329	-183.761
2012-12-21 08:39:05	173.98	180.28	12.6144	-177.35	-183.772
2012-12-21 08:40:05	174.01	180.28	12.6151	-177.38	-183.772
2012-12-21 08:41:05	174.04	180.29	12.6158	-177.411	-183.782	2012-12-21 08:41:05
2012-12-21 08:42:05	174.05	180.29	12.6165	-177.421	-183.782
2012-12-21 08:43:05	174.06	180.34	12.6172	-177.431	-183.833
2012-12-21 08:44:05	174.06	180.36	12.6179	-177.431	-183.853
2012-12-21 08:45:05	174.08	180.38	12.6186	-177.452	-183.874
2012-12-21 08:46:05	174.09	180.35	12.6193	-177.462	-183.843
2012-12-21 08:47:05	174.11	180.38	12.62	-177.482	-183.874	2012-12-21 08:47:05
2012-12-21 08:48:05	174.12	180.39	12.6207	-177.492	-183.884
2012-12-21 08:49:05	174.15	180.42	12.6214	-177.523	-183.914
2012-12-21 08:50:05	174.09	180.38	12.6221	-177.462	-183.874
2012-12-21 08:51:05	174.16	180.43	12.6228	-177.533	-183.925
2012-12-21 08:52:05	174.17	180.43	12.6235	-177.543	-183.925
2012-12-21 08:53:05	174.18	180.47	12.6242	-177.554	-183.965	2012-12-21 08:53:05
2012-12-21 08:54:05	174.19	180.49	12.6249	-177.564	-183.986
2012-12-21 08:55:05	174.2	180.51	12.6256	-177.574	-184.006
2012-12-21 08:56:05	174.2	180.48	12.6263	-177.574	-183.976
2012-12-21 08:57:05	174.17	180.48	12.6269	-177.543	-183.976
2012-12-21 08:58:05	174.16	180.53	12.6276	-177.533	-184.027
2012-12-21 08:59:05	174.2	180.56	12.6283	-177.574	-184.057	2012-12-21 08:59:05
2012-12-21 09:00:05	174.24	180.57	12.629	-177.615	-184.067
2012-12-21 09:01:05	174.21	180.57	12.6297	-177.584	-184.067
2012-12-21 09:02:05	174.25	180.56	12.6304	-177.625	-184.057
2012-12-21 09:03:05	174.27	180.6	12.6311	-177.645	-184.098
2012-12-21 09:04:05	174.28	180.64	12.6318	-177.655	-184.139
2012-12-21 09:05:05	174.28	180.62	12.6325	-177.655	-184.118	2012-12-21 09:05:05
2012-12-21 09:06:05	174.29	180.64	12.6332	-177.666	-184.139
2012-12-21 09:07:05	174.31	180.63	12.6339	-177.686	-184.128
2012-12-21 09:08:05	174.33	180.67	12.6346	-177.706	-184.169
2012-12-21 09:09:05	174.33	180.67	12.6353	-177.706	-184.169
2012-12-21 09:10:05	174.35	180.68	12.636	-177.727	-184.179
2012-12-21 09:11:05	174.35	180.69	12.6367	-177.727	-184.19	2012-12-21 09:11:05
2012-12-21 09:12:05	174.37	180.7	12.6374	-177.747	-184.2
2012-12-21 09:13:05	174.36	180.74	12.6381	-177.737	-184.241
2012-12-21 09:14:05	174.38	180.75	12.6388	-177.757	-184.251
2012-12-21 09:15:05	174.38	180.77	12.6394	-177.757	-184.271
2012-12-21 09:16:05	174.41	180.76	12.6401	-177.788	-184.261
2012-12-21 09:17:05	174.42	180.75	12.6408	-177.798	-184.251	2012-12-21 09:17:05
2012-12-21 09:18:05	174.44	180.81	12.6415	-177.819	-184.312
2012-12-21 09:19:05	174.38	180.78	12.6422	-177.757	-184.281
2012-12-21 09:20:05	174.43	180.8	12.6429	-177.808	-184.302
2012-12-21 09:30:05	174.49	180.9	12.6499	-177.87	-184.404
2012-12-21 09:40:05	174.57	181.05	12.6568	-177.951	-184.557
2012-12-21 09:50:05	174.63	181.14	12.6637	-178.012	-184.648	2012-12-21 09:50:05
2012-12-21 10:00:05	174.72	181.26	12.6707	-178.104	-184.771
2012-12-21 10:10:05	174.78	181.38	12.6776	-178.165	-184.893
2012-12-21 10:20:05	174.91	181.5	12.6846	-178.298	-185.015
2012-12-21 10:30:05	175	181.6	12.6915	-178.389	-185.117
2012-12-21 10:40:05	175.08	181.68	12.6985	-178.471	-185.199
2012-12-21 10:50:05	174.45	181.8	12.7054	-177.829	-185.321	2012-12-21 10:50:05
2012-12-21 11:00:05	175.22	181.92	12.7124	-178.614	-185.443
2012-12-21 11:10:05	175.33	182.06	12.7193	-178.726	-185.586
2012-12-21 11:20:05	175.42	182.12	12.7262	-178.818	-185.647
2012-12-21 11:30:05	175.52	182.26	12.7332	-178.919	-185.79
2012-12-21 11:40:05	175.6	182.35	12.7401	-179.001	-185.882
2012-12-21 11:50:05	175.69	182.46	12.7471	-179.093	-185.994	2012-12-21 11:50:05
2012-12-21 12:00:05	175.79	182.6	12.754	-179.195	-186.137
2012-12-21 12:10:05	175.87	182.7	12.761	-179.276	-186.239
2012-12-21 12:20:05	175.93	182.81	12.7679	-179.337	-186.351
2012-12-21 12:30:05	176.02	182.9	12.7749	-179.429	-186.442
2012-12-21 12:40:05	176.1	182.95	12.7818	-179.511	-186.493
2012-12-21 12:50:05	176.18	183.03	12.7887	-179.592	-186.575	2012-12-21 12:50:05
2012-12-21 13:00:05	176.26	183.2	12.7957	-179.674	-186.748
2012-12-21 13:10:05	176.38	183.32	12.8026	-179.796	-186.871
2012-12-21 13:20:05	176.45	183.41	12.8096	-179.867	-186.962
2012-12-21 13:30:05	176.55	183.6	12.8165	-179.969	-187.156
2012-12-21 13:40:05	176.64	183.64	12.8235	-180.061	-187.197
2012-12-21 13:50:05	176.71	183.8	12.8304	-180.133	-187.36	2012-12-21 13:50:05
2012-12-21 14:00:05	176.79	183.87	12.8374	-180.214	-187.431
2012-12-21 14:10:05	176.91	184.08	12.8443	-180.336	-187.645
2012-12-21 14:20:05	176.98	184.19	12.8512	-180.408	-187.757
2012-12-21 14:30:05	177.08	184.35	12.8582	-180.51	-187.92
2012-12-21 14:40:05	177.17	184.45	12.8651	-180.601	-188.022
2012-12-21 14:50:05	177.21	184.58	12.8721	-180.642	-188.155	2012-12-21 14:50:05
2012-12-21 15:00:05	177.28	184.68	12.879	-180.714	-188.257
2012-12-21 15:10:05	177.38	184.81	12.886	-180.815	-188.389
2012-12-21 15:20:05	177.46	184.95	12.8929	-180.897	-188.532
2012-12-21 15:30:05	177.57	185.06	12.8999	-181.009	-188.644
2012-12-21 15:40:05	177.64	185.21	12.9068	-181.081	-188.797
2012-12-21 15:50:05	177.76	185.29	12.9137	-181.203	-188.879	2012-12-21 15:50:05
2012-12-21 16:00:05	177.86	185.46	12.9207	-181.305	-189.052
2012-12-21 16:10:05	177.94	185.57	12.9276	-181.386	-189.164
2012-12-21 16:20:05	178.05	185.75	12.9346	-181.498	-189.348
2012-12-21 16:30:05	178.14	185.88	12.9415	-181.59	-189.48
2012-12-21 16:40:05	178.23	186	12.9485	-181.682	-189.602
2012-12-21 16:50:05	178.33	186.13	12.9554	-181.784	-189.735	2012-12-21 16:50:05
2012-12-21 17:00:05	178.42	186.3	12.9624	-181.876	-189.908
2012-12-21 17:10:05	178.48	186.42	12.9693	-181.937	-190.031
2012-12-21 17:20:05	178.56	186.51	12.9762	-182.018	-190.122
2012-12-21 17:30:05	178.68	186.7	12.9832	-182.141	-190.316
2012-12-21 17:40:05	178.76	186.82	12.9901	-182.222	-190.438
2012-12-21 17:50:05	178.86	186.96	12.9971	-182.324	-190.581	2012-12-21 17:50:05
2012-12-21 18:00:05	178.96	187.09	13.004	-182.426	-190.714
2012-12-21 18:10:05	179.05	187.26	13.011	-182.518	-190.887
2012-12-21 18:20:05	179.14	187.37	13.0179	-182.61	-190.999
2012-12-21 18:30:05	178.3	186.27	13.0249	-181.753	-189.878
2012-12-21 18:40:05	179.2	187.6	13.0318	-182.671	-191.233
2012-12-21 18:50:05	179.33	187.82	13.0387	-182.803	-191.458	2012-12-21 18:50:05
2012-12-21 19:00:05	179.45	188.04	13.0457	-182.926	-191.682
2012-12-21 19:10:05	179.58	188.2	13.0526	-183.058	-191.845
2012-12-21 19:20:05	179.7	188.39	13.0596	-183.18	-192.039
2012-12-21 19:30:05	179.8	188.55	13.0665	-183.282	-192.202
2012-12-21 19:40:05	179.91	188.72	13.0735	-183.394	-192.375
2012-12-21 19:50:05	180.01	188.9	13.0804	-183.496	-192.559	2012-12-21 19:50:05
2012-12-21 20:00:05	180.1	189.1	13.0874	-183.588	-192.762
2012-12-21 20:10:05	179.73	189.26	13.0943	-183.211	-192.926
2012-12-21 20:20:05	180.22	189.41	13.1012	-183.71	-193.078
2012-12-21 20:30:05	180.34	189.6	13.1082	-183.833	-193.272
2012-12-21 20:40:05	180.45	189.78	13.1151	-183.945	-193.456
2012-12-21 20:50:05	180.56	189.95	13.1221	-184.057	-193.629	2012-12-21 20:50:05
2012-12-21 21:00:05	180.67	190.1	13.129	-184.169	-193.782
2012-12-21 21:10:05	180.75	190.29	13.136	-184.251	-193.976
2012-12-21 21:20:05	180.83	190.45	13.1429	-184.332	-194.139
2012-12-21 21:30:05	180.94	190.58	13.1499	-184.444	-194.271
2012-12-21 21:40:05	181.05	190.66	13.1568	-184.557	-194.353
2012-12-21 21:50:05	181.17	190.94	13.1637	-184.679	-194.638	2012-12-21 21:50:05
2012-12-21 22:00:05	181.27	191.14	13.1707	-184.781	-194.842
2012-12-21 22:10:05	181.38	191.29	13.1776	-184.893	-194.995
2012-12-21 22:20:05	181.48	191.5	13.1846	-184.995	-195.209
2012-12-21 22:30:05	181.56	191.71	13.1915	-185.076	-195.423
2012-12-21 22:40:05	181.68	191.83	13.1985	-185.199	-195.545
2012-12-21 22:50:05	181.77	192.08	13.2054	-185.291	-195.8	2012-12-21 22:50:05
2012-12-21 23:00:05	181.88	192.28	13.2124	-185.403	-196.004
2012-12-21 23:10:05	181.97	192.47	13.2193	-185.494	-196.198
2012-12-21 23:20:05	182.05	192.65	13.2262	-185.576	-196.381
2012-12-21 23:30:05	182.18	192.82	13.2332	-185.708	-196.555
2012-12-21 23:40:05	182.26	193.05	13.2401	-185.79	-196.789
2012-12-21 23:50:05	182.36	193.26	13.2471	-185.892	-197.003	2012-12-21 23:50:05
2012-12-22 00:00:05	182.47	193.47	13.254	-186.004	-197.217
2012-12-22 00:10:05	182.56	193.67	13.261	-186.096	-197.421
2012-12-22 00:20:05	182.67	193.89	13.2679	-186.208	-197.645
2012-12-22 00:30:05	182.76	194.08	13.2749	-186.3	-197.839
2012-12-22 00:40:05	182.85	194.27	13.2818	-186.391	-198.033
2012-12-22 00:50:05	182.94	194.5	13.2887	-186.483	-198.267	2012-12-22 00:50:05
2012-12-22 01:00:05	183.06	194.65	13.2957	-186.606	-198.42
2012-12-22 01:10:05	183.15	194.88	13.3026	-186.697	-198.654
2012-12-22 01:20:05	183.24	195.11	13.3096	-186.789	-198.889
2012-12-22 01:30:05	183.33	195.27	13.3165	-186.881	-199.052
2012-12-22 01:40:05	183.44	195.46	13.3235	-186.993	-199.246
2012-12-22 01:50:05	183.5	195.68	13.3304	-187.054	-199.47	2012-12-22 01:50:05
2012-12-22 02:00:05	183.62	195.94	13.3374	-187.176	-199.735
2012-12-22 02:10:05	183.73	196.15	13.3443	-187.288	-199.949
2012-12-22 02:20:05	183.83	196.34	13.3512	-187.39	-200.143
2012-12-22 02:30:05	183.88	196.54	13.3582	-187.441	-200.347
2012-12-22 02:40:05	184.03	196.73	13.3651	-187.594	-200.54
2012-12-22 02:50:05	184.13	197.04	13.3721	-187.696	-200.856	2012-12-22 02:50:05
2012-12-22 03:00:05	184.2	197.3	13.379	-187.768	-201.121
2012-12-22 03:10:05	184.27	197.51	13.386	-187.839	-201.335
2012-12-22 03:20:05	184.37	197.71	13.3929	-187.941	-201.539
2012-12-22 03:30:05	184.47	197.95	13.3999	-188.043	-201.784
2012-12-22 03:40:05	184.57	198.15	13.4068	-188.145	-201.988
2012-12-22 03:50:05	184.64	198.38	13.4137	-188.216	-202.222	2012-12-22 03:50:05
2012-12-22 04:00:05	184.75	198.68	13.4207	-188.328	-202.528
2012-12-22 04:10:05	184.81	198.78	13.4276	-188.389	-202.63
2012-12-22 04:20:05	184.75	199.11	13.4346	-188.328	-202.966
2012-12-22 04:30:05	184.79	199.38	13.4415	-188.369	-203.242
2012-12-22 04:40:05	184.75	199.66	13.4485	-188.328	-203.527
2012-12-22 04:50:05	184.74	199.88	13.4554	-188.318	-203.751	2012-12-22 04:50:05
2012-12-22 05:00:05	184.78	200.15	13.4624	-188.359	-204.027
2012-12-22 05:10:05	184.82	200.44	13.4693	-188.4	-204.322
2012-12-22 05:20:05	184.92	200.7	13.4762	-188.502	-204.587
2012-12-22 05:30:05	185	200.94	13.4832	-188.583	-204.832
2012-12-22 05:40:05	185.42	201.16	13.4901	-189.011	-205.056
2012-12-22 05:50:05	185.57	201.48	13.4971	-189.164	-205.382	2012-12-22 05:50:05
2012-12-22 06:00:05	185.69	201.76	13.504	-189.286	-205.668
2012-12-22 06:10:05	185.82	202.02	13.511	-189.419	-205.933
2012-12-22 06:20:05	185.91	202.32	13.5179	-189.511	-206.239
2012-12-22 06:30:05	186.01	202.59	13.5249	-189.613	-206.514
2012-12-22 06:40:05	186.07	202.89	13.5318	-189.674	-206.82
2012-12-22 06:50:05	186.22	203.17	13.5387	-189.827	-207.105	2012-12-22 06:50:05
2012-12-22 07:00:05	186.33	203.44	13.5457	-189.939	-207.38
2012-12-22 07:10:05	186.42	203.73	13.5526	-190.031	-207.676
2012-12-22 07:20:05	186.54	203.99	13.5596	-190.153	-207.941
2012-12-22 07:30:05	186.63	204.27	13.5665	-190.245	-208.226
2012-12-22 07:40:05	186.71	204.69	13.5735	-190.326	-208.654
2012-12-22 07:50:05	186.85	204.99	13.5804	-190.469	-208.96	2012-12-22 07:50:05
2012-12-22 08:00:05	186.93	205.29	13.5874	-190.55	-209.266
2012-12-22 08:10:05	187.06	205.59	13.5943	-190.683	-209.572
2012-12-22 08:20:05	187.17	205.88	13.6012	-190.795	-209.867
2012-12-22 08:30:05	187.23	206.28	13.6082	-190.856	-210.275
2012-12-22 08:40:05	187.33	206.59	13.6151	-190.958	-210.591
2012-12-22 08:50:05	187.47	206.93	13.6221	-191.101	-210.938	2012-12-22 08:50:05
2012-12-22 09:00:05	187.55	207.19	13.629	-191.182	-211.203
2012-12-22 09:10:05	187.65	207.51	13.636	-191.284	-211.529
2012-12-22 09:20:05	187.75	207.94	13.6429	-191.386	-211.967
2012-12-22 09:30:05	187.87	208.25	13.6499	-191.509	-212.283
2012-12-22 09:40:05	187.93	208.55	13.6568	-191.57	-212.589
2012-12-22 09:50:05	184.76	206.3	13.6637	-188.338	-210.296	2012-12-22 09:50:05
2012-12-22 10:00:05	187.36	208.76	13.6707	-190.989	-212.803
2012-12-22 10:10:05	188.04	209.23	13.6776	-191.682	-213.282
2012-12-22 10:20:05	188.14	209.54	13.6846	-191.784	-213.598
2012-12-22 10:30:05	188.24	209.99	13.6915	-191.886	-214.057
2012-12-22 10:40:05	188.38	208.19	13.6985	-192.029	-212.222
2012-12-22 10:50:05	188.5	210.63	13.7054	-192.151	-214.709	2012-12-22 10:50:05
2012-12-22 11:00:05	188.61	211.09	13.7124	-192.263	-215.178
2012-12-22 11:10:05	188.7	211.51	13.7193	-192.355	-215.607
2012-12-22 11:20:05	188.81	211.76	13.7262	-192.467	-215.861
2012-12-22 11:30:05	188.9	212.16	13.7332	-192.559	-216.269
2012-12-22 11:40:05	189	212.48	13.7401	-192.661	-216.595
2012-12-22 11:50:05	189.11	212.91	13.7471	-192.773	-217.034	2012-12-22 11:50:05
2012-12-22 12:00:05	189.2	213.35	13.754	-192.864	-217.482
2012-12-22 12:10:05	189.28	213.75	13.761	-192.946	-217.89
2012-12-22 12:20:05	189.39	214.1	13.7679	-193.058	-218.247
2012-12-22 12:30:05	189.49	214.48	13.7749	-193.16	-218.634
2012-12-22 12:40:05	189.58	214.91	13.7818	-193.252	-219.072
2012-12-22 12:50:05	189.71	215.32	13.7887	-193.384	-219.49	2012-12-22 12:50:05
2012-12-22 13:00:05	189.79	215.65	13.7957	-193.466	-219.827
2012-12-22 13:10:05	189.9	216.07	13.8026	-193.578	-220.255
2012-12-22 13:20:05	190.02	216.48	13.8096	-193.7	-220.673
2012-12-22 13:30:05	190.12	216.86	13.8165	-193.802	-221.06
2012-12-22 13:40:05	190.23	217.31	13.8235	-193.914	-221.519
2012-12-22 13:50:05	190.33	217.77	13.8304	-194.016	-221.988	2012-12-22 13:50:05
2012-12-22 14:00:05	190.45	218.23	13.8374	-194.139	-222.457
2012-12-22 14:10:05	190.49	218.68	13.8443	-194.179	-222.915
2012-12-22 14:20:05	190.63	219.12	13.8512	-194.322	-223.364
2012-12-22 14:30:05	190.71	219.6	13.8582	-194.404	-223.853
2012-12-22 14:40:05	190.83	220.07	13.8651	-194.526	-224.332
2012-12-22 14:50:05	190.91	220.55	13.8721	-194.608	-224.822	2012-12-22 14:50:05
2012-12-22 15:00:05	191.01	221.03	13.879	-194.709	-225.311
2012-12-22 15:10:05	191.16	221.46	13.886	-194.862	-225.749
2012-12-22 15:20:05	191.25	221.81	13.8929	-194.954	-226.106
2012-12-22 15:30:05	191.33	222.35	13.8999	-195.036	-226.656
2012-12-22 15:40:05	191.44	222.81	13.9068	-195.148	-227.125
2012-12-22 15:50:05	191.56	223.24	13.9137	-195.27	-227.564	2012-12-22 15:50:05
2012-12-22 16:00:05	191.64	223.74	13.9207	-195.352	-228.073
2012-12-22 16:10:05	191.79	224.29	13.9276	-195.505	-228.634
2012-12-22 16:20:05	191.87	224.74	13.9346	-195.586	-229.093
2012-12-22 16:30:05	191.98	225.16	13.9415	-195.698	-229.521
2012-12-22 16:40:05	192.05	225.73	13.9485	-195.77	-230.102
2012-12-22 16:50:05	192.2	226.29	13.9554	-195.923	-230.673	2012-12-22 16:50:05
2012-12-22 17:00:05	192.32	226.68	13.9624	-196.045	-231.07
2012-12-22 17:10:05	192.42	226.96	13.9693	-196.147	-231.356
2012-12-22 17:20:05	192.51	227.84	13.9762	-196.239	-232.253
2012-12-22 17:30:05	192.64	228.39	13.9832	-196.371	-232.813
2012-12-22 17:40:05	192.73	228.91	13.9901	-196.463	-233.344
2012-12-22 17:50:05	192.86	229.45	13.9971	-196.595	-233.894	2012-12-22 17:50:05
2012-12-22 18:00:05	192.97	230.04	14.004	-196.707	-234.495
2012-12-22 18:10:05	193.08	230.58	14.011	-196.82	-235.046
2012-12-22 18:20:05	193.17	231.13	14.0179	-196.911	-235.607
2012-12-22 18:30:05	193.3	231.74	14.0249	-197.044	-236.228
2012-12-22 18:40:05	193.42	232.04	14.0318	-197.166	-236.534
2012-12-22 18:50:05	193.49	232.9	14.0387	-197.238	-237.411	2012-12-22 18:50:05
2012-12-22 19:00:05	193.6	233.5	14.0457	-197.35	-238.022
2012-12-22 19:10:05	193.73	234.19	14.0526	-197.482	-238.726
2012-12-22 19:20:05	191.4	232.27	14.0596	-195.107	-236.769
2012-12-22 19:30:05	193.31	234.82	14.0665	-197.054	-239.368
2012-12-22 19:40:05	193.55	235.74	14.0735	-197.299	-240.306
2012-12-22 19:50:05	194.07	236.36	14.0804	-197.829	-240.938	2012-12-22 19:50:05
2012-12-22 20:00:05	194.25	237.01	14.0874	-198.012	-241.6
2012-12-23 08:42:20	203.37	311.31	14.6167	-207.309	-317.339
2012-12-23 08:43:20	203.37	311.4	14.6174	-207.309	-317.431
2012-12-23 08:45:20	194.62	293.43	14.6188	-198.389	-299.113
2012-12-23 08:46:20	196.37	296.11	14.6195	-200.173	-301.845
2012-12-23 08:47:20	197.43	297.06	14.6202	-201.254	-302.813	2012-12-23 08:47:20
2012-12-23 08:48:20	198.2	298.39	14.6209	-202.039	-304.169
2012-12-23 08:49:20	198.79	299.52	14.6216	-202.64	-305.321
2012-12-23 08:50:20	199.17	300.44	14.6223	-203.028	-306.259
2012-12-23 08:51:20	199.62	301.64	14.623	-203.486	-307.482
2012-12-23 08:52:20	199.97	302.46	14.6236	-203.843	-308.318
2012-12-23 08:53:20	200.3	303.38	14.6243	-204.179	-309.256	2012-12-23 08:53:20
2012-12-23 08:54:20	200.54	304.09	14.625	-204.424	-309.98
2012-12-23 08:55:20	200.84	304.87	14.6257	-204.73	-310.775
2012-12-23 08:56:20	201.1	305.54	14.6264	-204.995	-311.458
2012-12-23 08:57:20	201.34	306.13	14.6271	-205.24	-312.059
2012-12-23 08:58:20	201.57	306.66	14.6278	-205.474	-312.599
2012-12-23 08:59:20	201.75	307.26	14.6285	-205.657	-313.211	2012-12-23 08:59:20
2012-12-23 09:00:20	201.94	307.81	14.6292	-205.851	-313.772
2012-12-23 09:01:20	202.55	307.47	14.6299	-206.473	-313.425
2012-12-23 09:02:20	201.49	307.57	14.6306	-205.392	-313.527
2012-12-23 09:03:20	200.88	308.48	14.6313	-204.771	-314.455
2012-12-23 09:04:20	181.65	279.18	14.632	-185.168	-284.587
2012-12-23 09:05:20	186.33	285.34	14.6327	-189.939	-290.866	2012-12-23 09:05:20
2012-12-23 09:06:20	188.62	288.27	14.6334	-192.273	-293.853
2012-12-23 09:07:20	190.11	290.26	14.6341	-193.792	-295.882
2012-12-23 09:08:20	191.23	291.86	14.6348	-194.934	-297.513
2012-12-23 09:09:20	192.14	293.22	14.6355	-195.861	-298.899
2012-12-23 09:10:20	192.91	294.38	14.6361	-196.646	-300.082
2012-12-23 09:11:20	193.59	295.46	14.6368	-197.339	-301.182	2012-12-23 09:11:20
2012-12-23 09:12:20	194.19	296.52	14.6375	-197.951	-302.263
2012-12-23 09:13:20	194.75	297.7	14.6382	-198.522	-303.466
2012-12-23 09:14:20	195.24	298.65	14.6389	-199.021	-304.434
2012-12-23 09:15:20	195.7	299.67	14.6396	-199.49	-305.474
2012-12-23 09:16:20	196.1	300.63	14.6403	-199.898	-306.453
2012-12-23 09:17:20	196.38	301.5	14.641	-200.183	-307.339	2012-12-23 09:17:20
2012-12-23 09:18:20	196.85	302.33	14.6417	-200.663	-308.186
2012-12-23 09:19:20	197.27	303.15	14.6424	-201.091	-309.021
2012-12-23 09:20:20	197.66	303.97	14.6431	-201.488	-309.857
2012-12-23 09:21:20	197.98	304.7	14.6438	-201.814	-310.601
2012-12-23 09:22:20	198.3	305.36	14.6445	-202.141	-311.274
2012-12-23 09:23:20	198.66	306.25	14.6452	-202.508	-312.181	2012-12-23 09:23:20
2012-12-23 09:24:20	198.97	307.07	14.6459	-202.824	-313.017
2012-12-23 09:25:20	199.27	307.72	14.6466	-203.129	-313.68
2012-12-23 09:26:20	199.56	308.39	14.6473	-203.425	-314.363
2012-12-23 09:27:20	199.86	309.08	14.648	-203.731	-315.066
2012-12-23 09:28:20	200.05	309.66	14.6486	-203.925	-315.657
2012-12-23 09:29:20	200.34	310.28	14.6493	-204.22	-316.29	2012-12-23 09:29:20
2012-12-23 09:30:20	200.57	310.84	14.65	-204.455	-316.86
2012-12-23 09:31:20	200.8	311.32	14.6507	-204.689	-317.35
2012-12-23 09:32:20	200.98	311.81	14.6514	-204.873	-317.849
2012-12-23 09:33:20	201.19	312.16	14.6521	-205.087	-318.206
2012-12-23 09:34:20	201.35	312.62	14.6528	-205.25	-318.675
2012-12-23 09:35:20	201.55	313.02	14.6535	-205.454	-319.083	2012-12-23 09:35:20
2012-12-23 09:36:20	201.77	313.46	14.6542	-205.678	-319.531
2012-12-23 09:37:20	201.94	313.69	14.6549	-205.851	-319.766
2012-12-23 09:38:20	202.13	314.02	14.6556	-206.045	-320.102
2012-12-23 09:39:20	202.26	314.38	14.6563	-206.177	-320.469
2012-12-23 09:40:20	202.44	314.68	14.657	-206.361	-320.775
2012-12-23 09:41:20	202.61	315.04	14.6577	-206.534	-321.142	2012-12-23 09:41:20
2012-12-23 09:42:20	202.72	315.32	14.6584	-206.646	-321.427
2012-12-23 09:52:20	203.64	318.09	14.6653	-207.584	-324.251
2012-12-23 10:02:20	204.07	320.71	14.6723	-208.022	-326.922
2012-12-23 10:12:20	204.38	322.81	14.6792	-208.338	-329.062
2012-12-23 10:22:20	204.7	324.78	14.6861	-208.665	-331.07
2012-12-23 10:32:20	204.97	326.64	14.6931	-208.94	-332.966	2012-12-23 10:32:20
2012-12-23 10:42:20	205.22	328.58	14.7	-209.195	-334.944
2012-12-23 10:52:20	205.46	330.8	14.707	-209.439	-337.207
2012-12-23 11:02:20	205.67	332.72	14.7139	-209.653	-339.164
2012-12-23 11:12:20	205.85	334.42	14.7209	-209.837	-340.897
2012-12-23 11:22:20	206.07	336.72	14.7278	-210.061	-343.242
2012-12-23 11:32:20	206.29	338.4	14.7348	-210.285	-344.954	2012-12-23 11:32:20
2012-12-23 11:42:20	206.44	340.52	14.7417	-210.438	-347.115
2012-12-23 11:52:20	206.66	342.39	14.7486	-210.663	-349.021
2012-12-23 12:02:20	206.83	344.56	14.7556	-210.836	-351.233
2012-12-23 12:12:20	207.02	346.39	14.7625	-211.03	-353.099
2012-12-23 12:22:20	207.22	348.61	14.7695	-211.233	-355.362
2012-12-23 12:32:20	207.36	350.72	14.7764	-211.376	-357.513	2012-12-23 12:32:20
2012-12-23 12:42:20	207.53	352.71	14.7834	-211.549	-359.541
2012-12-23 12:52:20	207.72	354.85	14.7903	-211.743	-361.723
2012-12-23 13:02:20	207.87	356.64	14.7973	-211.896	-363.547
2012-12-23 13:12:20	208.01	359.02	14.8042	-212.039	-365.973
2012-12-23 13:22:20	208.19	361.34	14.8111	-212.222	-368.338
2012-12-23 13:32:20	208.34	363.27	14.8181	-212.375	-370.306	2012-12-23 13:32:20
2012-12-23 13:42:20	208.5	365.31	14.825	-212.538	-372.385
2012-12-23 13:52:20	208.67	367.44	14.832	-212.712	-374.557
2012-12-23 14:02:20	208.81	369.46	14.8389	-212.854	-376.616
2012-12-23 14:12:20	208.89	371.12	14.8459	-212.936	-378.308
2012-12-23 14:22:20	209.01	373.27	14.8528	-213.058	-380.499
2012-12-23 14:32:20	209.18	375.3	14.8598	-213.231	-382.569	2012-12-23 14:32:20
2012-12-23 14:42:20	209.31	377.57	14.8667	-213.364	-384.883
2012-12-23 14:52:20	209.44	380.02	14.8736	-213.496	-387.38
2012-12-23 15:02:20	209.59	382.21	14.8806	-213.649	-389.613
2012-12-23 15:12:20	209.76	384.58	14.8875	-213.823	-392.029
2012-12-23 15:22:20	209.9	386.91	14.8945	-213.965	-394.404
2012-12-23 15:32:20	210.06	389.2	14.9014	-214.128	-396.738	2012-12-23 15:32:20
2012-12-23 15:42:20	210.23	391.49	14.9084	-214.302	-399.072
2012-12-23 15:52:20	210.26	393.42	14.9153	-214.332	-401.04
2012-12-23 16:02:20	210.48	396.05	14.9223	-214.557	-403.721
2012-12-23 16:12:20	210.67	398.58	14.9292	-214.75	-406.3
2012-12-23 16:22:20	210.86	400.64	14.9361	-214.944	-408.4
2012-12-23 16:32:20	211.02	402.82	14.9431	-215.107	-410.622	2012-12-23 16:32:20
2012-12-23 16:42:20	211.19	405.19	14.95	-215.28	-413.038
2012-12-23 16:52:20	211.38	408.43	14.957	-215.474	-416.34
2012-12-23 17:02:20	211.51	410.83	14.9639	-215.607	-418.787
2012-12-23 17:12:20	211.68	413.11	14.9709	-215.78	-421.111
2012-12-23 17:22:20	211.83	415.93	14.9778	-215.933	-423.986
2012-12-23 17:32:20	212.04	418.32	14.9848	-216.147	-426.422	2012-12-23 17:32:20
2012-12-23 17:42:20	212.14	421.2	14.9917	-216.249	-429.358
2012-12-23 17:52:20	212.35	424.21	14.9986	-216.463	-432.426
2012-12-23 18:02:20	212.55	426.86	15.0056	-216.667	-435.127
2012-12-23 18:12:20	212.65	429.54	15.0125	-216.769	-437.859
2012-12-23 18:22:20	212.83	431.7	15.0195	-216.952	-440.061
2012-12-23 18:32:20	213.03	434.83	15.0264	-217.156	-443.252	2012-12-23 18:32:20
2012-12-23 18:42:20	213.2	437.93	15.0334	-217.329	-446.412
2012-12-23 18:52:20	213.35	440.25	15.0403	-217.482	-448.777
2012-12-23 19:02:20	213.51	443.34	15.0473	-217.645	-451.927
2012-12-23 19:12:20	213.66	445.93	15.0542	-217.798	-454.567
2012-12-23 19:22:20	213.78	449.57	15.0611	-217.92	-458.277
2012-12-23 19:32:20	213.96	451.98	15.0681	-218.104	-460.734	2012-12-23 19:32:20
2012-12-23 19:42:20	214.08	454.87	15.075	-218.226	-463.68
2012-12-23 19:52:20	214.26	457.33	15.082	-218.41	-466.188
2012-12-23 20:02:20	214.42	460.94	15.0889	-218.573	-469.867
2012-12-23 20:12:20	214.48	464.26	15.0959	-218.634	-473.252
2012-12-23 20:22:20	214.72	467.24	15.1028	-218.879	-476.29
2012-12-23 20:32:20	214.89	470.48	15.1098	-219.052	-479.592	2012-12-23 20:32:20
2012-12-23 20:42:20	215.04	473.51	15.1167	-219.205	-482.681
2012-12-23 20:52:20	215.2	476.74	15.1236	-219.368	-485.973
2012-12-23 21:02:20	215.29	480.39	15.1306	-219.46	-489.694
2012-12-23 21:12:20	215.53	483.57	15.1375	-219.704	-492.936
2012-12-23 21:22:20	215.64	487.32	15.1445	-219.817	-496.758
2012-12-23 21:32:20	215.86	490.69	15.1514	-220.041	-500.194	2012-12-23 21:32:20
2012-12-23 21:42:20	216	494.11	15.1584	-220.183	-503.68
2012-12-23 21:52:20	216.18	496.72	15.1653	-220.367	-506.34
2012-12-23 22:02:20	216.38	500.02	15.1723	-220.571	-509.704
2012-12-23 22:12:20	216.57	503.64	15.1792	-220.765	-513.394
2012-12-23 22:22:20	216.75	505.51	15.1861	-220.948	-515.301
2012-12-23 22:32:20	216.96	508.5	15.1931	-221.162	-518.349	2012-12-23 22:32:20
2012-12-23 22:42:20	217.1	511.93	15.2	-221.305	-521.845
2012-12-23 22:52:20	217.24	515.01	15.207	-221.448	-524.985
2012-12-23 23:02:20	217.43	518.51	15.2139	-221.641	-528.552
2012-12-23 23:12:20	217.62	522.46	15.2209	-221.835	-532.579
2012-12-23 23:22:20	217.8	526.06	15.2278	-222.018	-536.249
2012-12-23 23:32:20	217.99	528.94	15.2348	-222.212	-539.185	2012-12-23 23:32:20
2012-12-23 23:42:20	218.14	533.59	15.2417	-222.365	-543.925
2012-12-23 23:52:20	218.33	537.25	15.2486	-222.559	-547.655
2012-12-24 00:02:20	218.49	540.79	15.2556	-222.722	-551.264
2012-12-24 00:12:20	218.71	545.61	15.2625	-222.946	-556.177
2012-12-24 00:22:20	218.86	549.23	15.2695	-223.099	-559.867
2012-12-24 00:32:20	219.06	552.61	15.2764	-223.303	-563.313	2012-12-24 00:32:20
2012-12-24 00:42:20	218.87	557.68	15.2834	-223.109	-568.481
2012-12-24 00:52:20	219.37	561.5	15.2903	-223.619	-572.375
2012-12-24 01:02:20	219.56	565.53	15.2973	-223.812	-576.483
2012-12-24 01:12:20	219.72	568.62	15.3042	-223.976	-579.633
2012-12-24 01:22:20	219.92	570.46	15.3111	-224.179	-581.509
2012-12-24 01:32:20	220.16	576.58	15.3181	-224.424	-587.747	2012-12-24 01:32:20
2012-12-24 01:42:20	220.36	581.75	15.325	-224.628	-593.017
2012-12-24 01:52:20	220.56	586.37	15.332	-224.832	-597.727
2012-12-24 02:02:20	220.68	591.35	15.3389	-224.954	-602.803
2012-12-24 02:12:20	220.88	596.22	15.3459	-225.158	-607.768
2012-12-24 02:22:20	221.02	601.06	15.3528	-225.301	-612.701
2012-12-24 02:32:20	221.28	605.14	15.3598	-225.566	-616.86	2012-12-24 02:32:20
2012-12-24 02:42:20	221.42	611.09	15.3667	-225.708	-622.926
2012-12-24 02:52:20	221.66	615.13	15.3736	-225.953	-627.044
2012-12-24 03:02:20	221.5	620.72	15.3806	-225.79	-632.742
2012-12-24 03:12:20	222.02	625.52	15.3875	-226.32	-637.635
2012-12-24 03:22:20	222	630.29	15.3945	-226.3	-642.497
2012-12-24 03:32:20	222.39	635.34	15.4014	-226.697	-647.645	2012-12-24 03:32:20
[truncated: 958 more rows]

## Sheet: Tensi
Zeit [d]	MP bot(2) [cm]	MP top(1) [cm]		air entry bot		AE time	AE [cm]	Type	Pos	Weight
1.92735	-5.61672	-8.18552		2012-12-28 08:55:30	8800	19.6258	-8970.44	1	2	1
1.93429	-5.73904	-8.31804
1.94124	-5.8104	-8.3792		air entry top
1.94818	-5.87156	-8.43017		Time				Type	Pos	Weight
1.95513	-5.93272	-8.50153		2012-12-26 00:52:20	8800	17.2903	-8970.44	1	1	1
1.96207	-5.99388	-8.5525
1.96902	-6.04485	-8.59327
2.01068	-6.38124	-8.93986
2.05235	-6.52396	-9.09276
2.09402	-6.75841	-9.32722
2.13568	-6.95209	-9.53109
2.17735	-7.16616	-9.75535
2.21902	-7.24771	-9.80632
2.26068	-7.52294	-10.0917
2.30235	-7.7472	-10.316
2.34402	-7.94088	-10.4995
2.38568	-8.13456	-10.6728
2.42735	-8.33843	-10.8563
2.46902	-8.50153	-11.0092
2.51068	-8.66463	-11.1621
2.55235	-8.80734	-11.2946
2.59402	-8.97044	-11.4373
2.63568	-9.13354	-11.6208
2.67735	-9.29664	-11.7737
2.71902	-9.45973	-11.9164
2.75281	-9.65341	-12.0999
2.75767	-9.32722	-11.7635
2.76184	-9.3578	-11.8858
2.76601	-9.5107	-11.947
2.77017	-9.60245	-12.0387
2.77434	-9.66361	-12.0897
2.77851	-9.62283	-12.0489
2.78267	-9.684	-12.1101
2.78684	-9.71458	-12.1509
2.79101	-9.70438	-12.1509
2.80767	-9.78593	-12.212
2.84934	-9.97961	-12.4159
2.89101	-10.1733	-12.579
2.93267	-10.3466	-12.7523
2.97434	-10.4485	-12.8644
3.01601	-10.1019	-12.4975
3.05767	-10.6116	-12.9766
3.09934	-10.7238	-13.0785
3.14101	-10.9786	-13.3333
3.18267	-11.1519	-13.4964
3.22434	-11.3456	-13.6901
3.26601	-11.5189	-13.8634
3.30767	-11.6412	-13.9959
3.34934	-11.8451	-14.1794
3.39101	-11.9674	-14.3119
3.43267	-12.1305	-14.4852
3.47434	-12.2936	-14.6483
3.51601	-12.4669	-14.8216
3.55767	-12.63	-14.9745
3.59934	-12.7013	-15.0255
3.64101	-12.8542	-15.1886
3.68267	-13.0071	-15.3517
3.72434	-13.1702	-15.525
3.76601	-13.3028	-15.6575
3.80767	-13.4455	-15.79
3.84934	-13.5984	-15.9123
3.89101	-13.7411	-16.0754
3.93267	-13.8634	-16.1978
3.97434	-14.0163	-16.3507
4.01601	-14.1488	-16.4934
4.05767	-14.3323	-16.6565
4.09934	-14.4648	-16.8196
4.14101	-14.6381	-16.9929
4.18267	-14.7706	-17.1254
4.22434	-14.9235	-17.2783
4.26601	-15.0765	-17.4414
4.30767	-15.209	-17.5841
4.34934	-15.3823	-17.7472
4.39101	-15.5046	-17.8797
4.43267	-15.6677	-18.0326
4.47434	-15.8002	-18.1753
4.51601	-15.9429	-18.318
4.55767	-16.0856	-18.4608
4.59934	-16.2385	-18.6137
4.64101	-16.3914	-18.7666
4.68267	-16.5443	-18.9195
4.72434	-16.7074	-19.1131
4.76601	-16.8298	-19.2253
4.80767	-16.9827	-19.3782
4.85628	-16.1876	-18.5219
4.89795	-16.9725	-19.2966
4.93962	-17.2885	-19.6228
4.98128	-17.472	-19.8063
5.02295	-17.686	-20.0102
5.06462	-17.9001	-20.2345
5.10628	-18.1142	-20.4383
5.14795	-18.2977	-20.632
5.18962	-18.4608	-20.8053
5.23128	-18.6544	-20.999
5.27295	-18.8379	-21.1825
5.31462	-19.0214	-21.3761
5.35628	-19.2355	-21.58
5.39795	-19.419	-21.7737
5.43962	-19.633	-21.9878
5.48128	-19.8267	-22.1713
5.52295	-20.0102	-22.3751
5.56462	-20.2141	-22.5688
5.60628	-20.3976	-22.7523
5.64795	-20.5403	-22.895
5.68962	-20.7034	-23.0887
5.73128	-20.9072	-23.2722
5.77295	-21.1111	-23.476
5.81462	-21.3252	-23.6697
5.85628	-21.5291	-23.8736
5.89795	-21.7329	-24.1081
5.93962	-21.9572	-24.3119
5.98128	-22.1916	-24.5362
6.02295	-22.4261	-24.7706
6.06462	-22.63	-24.9949
6.10628	-22.7931	-25.1274
6.14795	-23.0683	-25.4128
6.18962	-23.3129	-25.6677
6.23128	-23.5372	-25.8919
6.27295	-23.7717	-26.1366
6.31462	-23.9755	-26.3609
6.35628	-24.261	-26.6157
6.39795	-24.475	-26.8502
6.43962	-24.7095	-27.0948
6.48128	-24.9439	-27.3191
6.52295	-25.158	-27.5433
6.56462	-25.3823	-27.7574
6.60628	-25.5963	-27.9715
6.64795	-25.841	-28.2161
6.68962	-26.0958	-28.4709
6.73128	-26.3303	-28.7156
6.77295	-26.5443	-28.9399
6.81462	-26.8094	-29.2151
6.85628	-27.0744	-29.4699
6.89795	-27.3394	-29.7452
6.93962	-27.6045	-30
6.98128	-27.8797	-30.2854
7.02295	-28.1753	-30.581
7.06462	-28.4709	-30.8665
7.10628	-28.7666	-31.1825
7.14795	-29.0928	-31.4985
7.18962	-29.419	-31.8349
7.23128	-29.7554	-32.1611
7.27295	-30.0815	-32.4771
7.31462	-30.4281	-32.8338
7.35628	-30.7645	-33.1702
7.39795	-31.0805	-33.4964
7.43962	-31.4577	-33.8736
7.48128	-31.8247	-34.2508
7.52295	-32.212	-34.6381
7.56462	-32.5586	-34.9847
7.60628	-32.9664	-35.3925
7.64795	-33.3435	-35.7696
7.68962	-33.7105	-36.1468
7.73128	-34.1386	-36.5647
7.77295	-34.5668	-36.9929
7.81462	-34.9643	-37.3904
7.85628	-35.423	-37.8593
7.89795	-35.8716	-38.318
7.93962	-36.3303	-38.7666
7.98128	-36.789	-39.2049
8.02295	-37.3191	-39.7655
8.06462	-37.9001	-40.3262
8.10628	-38.4404	-40.8869
8.14795	-39.0418	-41.4985
8.18962	-39.6228	-42.0591
8.23128	-40.2345	-42.7013
8.27295	-40.8665	-43.3231
8.31462	-41.5189	-43.9653
8.35628	-42.1407	-44.6075
8.39795	-42.8338	-45.3007
8.43962	-43.4964	-45.9735
8.48128	-44.1692	-46.6667
8.52295	-44.842	-47.3394
8.56462	-45.5556	-48.0734
8.60628	-46.3201	-48.8379
8.64795	-47.105	-49.6738
8.68962	-47.9511	-50.4893
8.73128	-48.6952	-51.2232
8.77295	-49.8267	-52.3344
8.81462	-50.8665	-53.3741
8.85628	-51.7941	-54.3221
8.89795	-52.7217	-55.2497
8.93962	-53.8634	-56.4016
8.98128	-55.0357	-57.5739
9.02295	-56.2181	-58.7768
9.06462	-57.4414	-60.0102
9.10628	-58.7258	-61.2946
9.14795	-60.0815	-62.6504
9.18962	-61.4679	-64.0571
9.23128	-62.8848	-65.4842
9.27295	-64.3425	-66.9725
9.31462	-65.8308	-68.4302
9.35628	-67.3598	-69.9898
9.39795	-68.8685	-71.5087
9.43962	-70.4995	-73.1498
9.48128	-72.1203	-74.8114
9.52295	-73.7207	-76.3812
9.56462	-75.3109	-78.0224
9.60628	-76.9317	-79.6942
9.64795	-78.4506	-81.213
9.68962	-80.0408	-82.8135
9.73128	-81.7227	-84.4852
9.77295	-83.3333	-86.1162
9.81462	-85.0866	-87.8695
9.85628	-86.7992	-89.684
9.89795	-88.5525	-91.366
9.93962	-90.316	-93.262
9.98128	-92.1407	-95.0459
10.023	-94.0265	-96.9521
10.0646	-96.1366	-99.052
10.1063	-98.1855	-101.101
10.148	-100.143	-103.099
10.1896	-102.222	-105.24
10.2313	-104.302	-107.309
10.273	-106.239	-109.276
10.3146	-108.257	-111.346
10.3563	-110.224	-113.364
10.398	-112.202	-115.392
10.4396	-114.179	-117.472
10.4813	-116.32	-119.633
10.523	-118.389	-121.804
10.5646	-120.55	-123.986
10.6063	-122.681	-126.208
10.648	-124.893	-128.522
10.6896	-127.095	-130.765
10.7313	-129.113	-132.987
10.773	-131.448	-135.26
10.8146	-133.537	-137.39
10.8563	-135.545	-139.602
10.898	-137.594	-141.753
10.9396	-139.551	-143.721
10.9813	-141.498	-145.708
11.023	-143.496	-147.768
11.0646	-145.454	-149.704
11.1063	-147.288	-151.631
11.148	-148.97	-153.323
11.1896	-150.418	-154.964
11.2313	-151.998	-156.544
11.273	-153.415	-158.104
11.3146	-154.801	-159.572
11.3563	-156.106	-161.009
11.398	-157.329	-162.355
11.4396	-158.512	-163.639
11.4813	-159.613	-164.811
11.523	-160.642	-165.943
11.5646	-161.549	-167.013
11.6132	-162.324	-168.247
11.6549	-163.231	-169.225
11.6966	-164.088	-170.112
11.7382	-164.21	-170.805
11.7799	-164.862	-171.315
11.8216	-165.923	-172.222
11.8632	-166.83	-173.119
11.9049	-167.615	-173.863
11.9466	-168.369	-174.669
11.9882	-168.94	-175.291
12.0299	-169.684	-175.953
12.6033	-175.087	-181.254
12.6075	-176.504	-182.752
12.6117	-177.146	-183.619
12.6158	-177.411	-183.782
12.62	-177.482	-183.874
12.6242	-177.554	-183.965
12.6283	-177.574	-184.057
12.6325	-177.655	-184.118
12.6367	-177.727	-184.19
12.6408	-177.798	-184.251
12.6637	-178.012	-184.648
12.7054	-177.829	-185.321
12.7471	-179.093	-185.994
12.7887	-179.592	-186.575
12.8304	-180.133	-187.36
12.8721	-180.642	-188.155
12.9137	-181.203	-188.879
12.9554	-181.784	-189.735
12.9971	-182.324	-190.581
13.0387	-182.803	-191.458
13.0804	-183.496	-192.559
13.1221	-184.057	-193.629
13.1637	-184.679	-194.638
13.2054	-185.291	-195.8
13.2471	-185.892	-197.003
13.2887	-186.483	-198.267
13.3304	-187.054	-199.47
13.3721	-187.696	-200.856
13.4137	-188.216	-202.222
13.4554	-188.318	-203.751
13.4971	-189.164	-205.382
13.5387	-189.827	-207.105
13.5804	-190.469	-208.96
13.6221	-191.101	-210.938
13.6637	-188.338	-210.296
13.7054	-192.151	-214.709
13.7471	-192.773	-217.034
13.7887	-193.384	-219.49
13.8304	-194.016	-221.988
13.8721	-194.608	-224.822
13.9137	-195.27	-227.564
13.9554	-195.923	-230.673
13.9971	-196.595	-233.894
14.0387	-197.238	-237.411
14.0804	-197.829	-240.938
14.6202	-201.254	-302.813
14.6243	-204.179	-309.256
14.6285	-205.657	-313.211
14.6327	-189.939	-290.866
14.6368	-197.339	-301.182
14.641	-200.183	-307.339
14.6452	-202.508	-312.181
14.6493	-204.22	-316.29
14.6535	-205.454	-319.083
14.6577	-206.534	-321.142
14.6931	-208.94	-332.966
14.7348	-210.285	-344.954
14.7764	-211.376	-357.513
14.8181	-212.375	-370.306
14.8598	-213.231	-382.569
14.9014	-214.128	-396.738
14.9431	-215.107	-410.622
14.9848	-216.147	-426.422
15.0264	-217.156	-443.252
15.0681	-218.104	-460.734
15.1098	-219.052	-479.592
15.1514	-220.041	-500.194
15.1931	-221.162	-518.349
15.2348	-222.212	-539.185
15.2764	-223.303	-563.313
15.3181	-224.424	-587.747
15.3598	-225.566	-616.86
15.4014	-226.697	-647.645
15.4431	-227.92	-678.909
15.4848	-229.103	-713.18
15.5264	-230.296	-747.197
15.5681	-231.59	-788.716
15.6098	-233.007	-832.63
15.6514	-234.383	-879.939
15.6931	-235.372	-929.684
15.707	-235.923	-947.625
15.7348	-236.942
15.7764	-238.552
15.8181	-240.143
15.8598	-241.733
15.9014	-243.466
15.9431	-245.056
15.9848	-246.707
16.0264	-248.359
16.0681	-250.163
16.1098	-251.886
16.1514	-253.598
16.1931	-255.596
16.2348	-257.36
16.2764	-259.46
16.3181	-261.549
16.3598	-263.609
16.4014	-265.708
16.4431	-268.033
16.4848	-270.469
16.5264	-272.875
16.5681	-275.127
16.6098	-277.931
16.6514	-280.785
16.6931	-283.221
16.7348	-285.27
16.7764	-288.614
16.8181	-292.773
16.8598	-296.606
16.9014	-299.898
16.9431	-303.639
16.9848	-307.39
17.0264	-311.539
17.0681	-315.688
17.1098	-319.766
17.1514	-323.649
17.1931	-328.277
17.2348	-332.895
17.2764	-337.023
17.3181	-341.6
17.3598	-346.799
17.4014	-352.151
17.4431	-356.626
17.4848	-363.231
17.5264	-369.307
17.5681	-375.953
17.6098	-383.18
17.6514	-390.041
17.6931	-397.421
17.7348	-405.148
17.7764	-412.875
17.8181	-421.498
17.8598	-430.01
17.9014	-437.36
17.9431	-449.225
17.9848	-460.02
18.0264	-470.877
18.0681	-482.253
18.1098	-493.68
18.1514	-505.505
18.1931	-518.848
18.2348	-531.692
18.2695	-543.099

## Sheet: HYDRUS
Data für die Zielfunktion: 2 x Tensionen, 1 x Endwassergehalt						Verdunstungsrate
Time	Obs	Type	Pos	Weight		Zeitintervall		Evarate [cm/d]			Type	1-Tension	2-Wassergehalt
1.92735	-5.61672	1	2	1		0.748727	0	0.438464			Pos	1-top	2-bot	(von oben nach unten)
1.93429	-5.73904	1	2	1		1.07792	0	0.405701			32	Time-Variable boundary conditions+
1.94124	-5.8104	1	2	1		1.64521	0	0.378839			20.658	Final Time	Time Information
1.94818	-5.87156	1	2	1		2.21439	0	0.35331			772	Number of Data Points in Objective Function
1.95513	-5.93272	1	2	1		2.75258	0	0.334126		Interpolated Values	-4.37101	BC-top	[hPa]
1.96207	-5.99388	1	2	1		2.9808	0	0.330556			-3.12101	MP_top_ini	[hPa]	1
1.96902	-6.04485	1	2	1		3.64289	0	0.343474			-0.0708418	MP_bot_ini	[hPa]	2
2.01068	-6.38124	1	2	1		3.97619	0	0.321744			1.17916	BC-bot	[hPa]
2.05235	-6.52396	1	2	1		4.6653	0	0.313143
2.09402	-6.75841	1	2	1		5.16786	0	0.323782
2.13568	-6.95209	1	2	1		5.64286	0	0.318098
2.17735	-7.16616	1	2	1		6.09078	0	0.329988		Real Values	-1.25	BC-top	[cm]
2.21902	-7.24771	1	2	1		6.74147	0	0.28748				MP_top_ini	[cm]
2.26068	-7.52294	1	2	1		7.86161	0	0.270956				MP_bot_ini	[cm]
2.30235	-7.7472	1	2	1		8.62828	0	0.270595			1.25	BC-bot	[cm]
2.34402	-7.94088	1	2	1		9.59841	0	0.28143
2.38568	-8.13456	1	2	1		9.94147	0	0.250586
2.42735	-8.33843	1	2	1		10.5908	0	0.259386
2.46902	-8.50153	1	2	1		10.9512	0	0.262854
2.51068	-8.66463	1	2	1		11.6012	0	0.263481
2.55235	-8.80734	1	2	1		11.9797	0	0.255552
2.59402	-8.97044	1	2	1		12.5991	0	0.218787
2.63568	-9.13354	1	2	1		13.0213	0	0.19581
2.67735	-9.29664	1	2	1		13.6602	0	0.183982
2.71902	-9.45973	1	2	1		14.0567	0	0.163177
2.75281	-9.65341	1	2	1		14.6186	0	0.151435
2.75767	-9.32722	1	2	1		16.7408	0	0.116044
2.76184	-9.3578	1	2	1		17.8616	0	0.0890237
2.76601	-9.5107	1	2	1		18.754	0	0.0764284
2.77017	-9.60245	1	2	1		19.0074	0	0.07354
2.77434	-9.66361	1	2	1		19.6567	0	0.0699127
2.77851	-9.62283	1	2	1		20.658	0	0.0628949
2.78267	-9.684	1	2	1
2.78684	-9.71458	1	2	1
2.79101	-9.70438	1	2	1
2.80767	-9.78593	1	2	1
2.84934	-9.97961	1	2	1
2.89101	-10.1733	1	2	1
2.93267	-10.3466	1	2	1
2.97434	-10.4485	1	2	1
3.01601	-10.1019	1	2	1
3.05767	-10.6116	1	2	1
3.09934	-10.7238	1	2	1
3.14101	-10.9786	1	2	1
3.18267	-11.1519	1	2	1
3.22434	-11.3456	1	2	1
3.26601	-11.5189	1	2	1
3.30767	-11.6412	1	2	1
3.34934	-11.8451	1	2	1
3.39101	-11.9674	1	2	1
3.43267	-12.1305	1	2	1
3.47434	-12.2936	1	2	1
3.51601	-12.4669	1	2	1
3.55767	-12.63	1	2	1
3.59934	-12.7013	1	2	1
3.64101	-12.8542	1	2	1
3.68267	-13.0071	1	2	1
3.72434	-13.1702	1	2	1
3.76601	-13.3028	1	2	1
3.80767	-13.4455	1	2	1
3.84934	-13.5984	1	2	1
3.89101	-13.7411	1	2	1
3.93267	-13.8634	1	2	1
3.97434	-14.0163	1	2	1
4.01601	-14.1488	1	2	1
4.05767	-14.3323	1	2	1
4.09934	-14.4648	1	2	1
4.14101	-14.6381	1	2	1
4.18267	-14.7706	1	2	1
4.22434	-14.9235	1	2	1
4.26601	-15.0765	1	2	1
4.30767	-15.209	1	2	1
4.34934	-15.3823	1	2	1
4.39101	-15.5046	1	2	1
4.43267	-15.6677	1	2	1
4.47434	-15.8002	1	2	1
4.51601	-15.9429	1	2	1
4.55767	-16.0856	1	2	1
4.59934	-16.2385	1	2	1
4.64101	-16.3914	1	2	1
4.68267	-16.5443	1	2	1
4.72434	-16.7074	1	2	1
4.76601	-16.8298	1	2	1
4.80767	-16.9827	1	2	1
4.85628	-16.1876	1	2	1
4.89795	-16.9725	1	2	1
4.93962	-17.2885	1	2	1
4.98128	-17.472	1	2	1
5.02295	-17.686	1	2	1
5.06462	-17.9001	1	2	1
5.10628	-18.1142	1	2	1
5.14795	-18.2977	1	2	1
5.18962	-18.4608	1	2	1
5.23128	-18.6544	1	2	1
5.27295	-18.8379	1	2	1
5.31462	-19.0214	1	2	1
5.35628	-19.2355	1	2	1
5.39795	-19.419	1	2	1
5.43962	-19.633	1	2	1
5.48128	-19.8267	1	2	1
5.52295	-20.0102	1	2	1
5.56462	-20.2141	1	2	1
5.60628	-20.3976	1	2	1
5.64795	-20.5403	1	2	1
5.68962	-20.7034	1	2	1
5.73128	-20.9072	1	2	1
5.77295	-21.1111	1	2	1
5.81462	-21.3252	1	2	1
5.85628	-21.5291	1	2	1
5.89795	-21.7329	1	2	1
5.93962	-21.9572	1	2	1
5.98128	-22.1916	1	2	1
6.02295	-22.4261	1	2	1
6.06462	-22.63	1	2	1
6.10628	-22.7931	1	2	1
6.14795	-23.0683	1	2	1
6.18962	-23.3129	1	2	1
6.23128	-23.5372	1	2	1
6.27295	-23.7717	1	2	1
6.31462	-23.9755	1	2	1
6.35628	-24.261	1	2	1
6.39795	-24.475	1	2	1
6.43962	-24.7095	1	2	1
6.48128	-24.9439	1	2	1
6.52295	-25.158	1	2	1
6.56462	-25.3823	1	2	1
6.60628	-25.5963	1	2	1
6.64795	-25.841	1	2	1
6.68962	-26.0958	1	2	1
6.73128	-26.3303	1	2	1
6.77295	-26.5443	1	2	1
6.81462	-26.8094	1	2	1
6.85628	-27.0744	1	2	1
6.89795	-27.3394	1	2	1
6.93962	-27.6045	1	2	1
6.98128	-27.8797	1	2	1
7.02295	-28.1753	1	2	1
7.06462	-28.4709	1	2	1
7.10628	-28.7666	1	2	1
7.14795	-29.0928	1	2	1
7.18962	-29.419	1	2	1
7.23128	-29.7554	1	2	1
7.27295	-30.0815	1	2	1
7.31462	-30.4281	1	2	1
7.35628	-30.7645	1	2	1
7.39795	-31.0805	1	2	1
7.43962	-31.4577	1	2	1
7.48128	-31.8247	1	2	1
7.52295	-32.212	1	2	1
7.56462	-32.5586	1	2	1
7.60628	-32.9664	1	2	1
7.64795	-33.3435	1	2	1
7.68962	-33.7105	1	2	1
7.73128	-34.1386	1	2	1
7.77295	-34.5668	1	2	1
7.81462	-34.9643	1	2	1
7.85628	-35.423	1	2	1
7.89795	-35.8716	1	2	1
7.93962	-36.3303	1	2	1
7.98128	-36.789	1	2	1
8.02295	-37.3191	1	2	1
8.06462	-37.9001	1	2	1
8.10628	-38.4404	1	2	1
8.14795	-39.0418	1	2	1
8.18962	-39.6228	1	2	1
8.23128	-40.2345	1	2	1
8.27295	-40.8665	1	2	1
8.31462	-41.5189	1	2	1
8.35628	-42.1407	1	2	1
8.39795	-42.8338	1	2	1
8.43962	-43.4964	1	2	1
8.48128	-44.1692	1	2	1
8.52295	-44.842	1	2	1
8.56462	-45.5556	1	2	1
8.60628	-46.3201	1	2	1
8.64795	-47.105	1	2	1
8.68962	-47.9511	1	2	1
8.73128	-48.6952	1	2	1
8.77295	-49.8267	1	2	1
8.81462	-50.8665	1	2	1
8.85628	-51.7941	1	2	1
8.89795	-52.7217	1	2	1
8.93962	-53.8634	1	2	1
8.98128	-55.0357	1	2	1
9.02295	-56.2181	1	2	1
9.06462	-57.4414	1	2	1
9.10628	-58.7258	1	2	1
9.14795	-60.0815	1	2	1
9.18962	-61.4679	1	2	1
9.23128	-62.8848	1	2	1
9.27295	-64.3425	1	2	1
9.31462	-65.8308	1	2	1
9.35628	-67.3598	1	2	1
9.39795	-68.8685	1	2	1
9.43962	-70.4995	1	2	1
9.48128	-72.1203	1	2	1
9.52295	-73.7207	1	2	1
9.56462	-75.3109	1	2	1
9.60628	-76.9317	1	2	1
9.64795	-78.4506	1	2	1
9.68962	-80.0408	1	2	1
9.73128	-81.7227	1	2	1
9.77295	-83.3333	1	2	1
9.81462	-85.0866	1	2	1
9.85628	-86.7992	1	2	1
9.89795	-88.5525	1	2	1
9.93962	-90.316	1	2	1
9.98128	-92.1407	1	2	1
10.023	-94.0265	1	2	1
10.0646	-96.1366	1	2	1
10.1063	-98.1855	1	2	1
10.148	-100.143	1	2	1
10.1896	-102.222	1	2	1
10.2313	-104.302	1	2	1
10.273	-106.239	1	2	1
10.3146	-108.257	1	2	1
10.3563	-110.224	1	2	1
10.398	-112.202	1	2	1
10.4396	-114.179	1	2	1
10.4813	-116.32	1	2	1
10.523	-118.389	1	2	1
10.5646	-120.55	1	2	1
10.6063	-122.681	1	2	1
10.648	-124.893	1	2	1
10.6896	-127.095	1	2	1
10.7313	-129.113	1	2	1
10.773	-131.448	1	2	1
10.8146	-133.537	1	2	1
10.8563	-135.545	1	2	1
10.898	-137.594	1	2	1
10.9396	-139.551	1	2	1
10.9813	-141.498	1	2	1
11.023	-143.496	1	2	1
11.0646	-145.454	1	2	1
11.1063	-147.288	1	2	1
11.148	-148.97	1	2	1
11.1896	-150.418	1	2	1
11.2313	-151.998	1	2	1
11.273	-153.415	1	2	1
11.3146	-154.801	1	2	1
11.3563	-156.106	1	2	1
11.398	-157.329	1	2	1
11.4396	-158.512	1	2	1
11.4813	-159.613	1	2	1
11.523	-160.642	1	2	1
11.5646	-161.549	1	2	1
11.6132	-162.324	1	2	1
11.6549	-163.231	1	2	1
11.6966	-164.088	1	2	1
11.7382	-164.21	1	2	1
11.7799	-164.862	1	2	1
11.8216	-165.923	1	2	1
11.8632	-166.83	1	2	1
11.9049	-167.615	1	2	1
11.9466	-168.369	1	2	1
11.9882	-168.94	1	2	1
12.0299	-169.684	1	2	1
12.6033	-175.087	1	2	1
12.6075	-176.504	1	2	1
12.6117	-177.146	1	2	1
12.6158	-177.411	1	2	1
12.62	-177.482	1	2	1
12.6242	-177.554	1	2	1
12.6283	-177.574	1	2	1
12.6325	-177.655	1	2	1
12.6367	-177.727	1	2	1
12.6408	-177.798	1	2	1
12.6637	-178.012	1	2	1
12.7054	-177.829	1	2	1
12.7471	-179.093	1	2	1
12.7887	-179.592	1	2	1
12.8304	-180.133	1	2	1
12.8721	-180.642	1	2	1
12.9137	-181.203	1	2	1
12.9554	-181.784	1	2	1
12.9971	-182.324	1	2	1
13.0387	-182.803	1	2	1
13.0804	-183.496	1	2	1
13.1221	-184.057	1	2	1
13.1637	-184.679	1	2	1
13.2054	-185.291	1	2	1
13.2471	-185.892	1	2	1
13.2887	-186.483	1	2	1
13.3304	-187.054	1	2	1
13.3721	-187.696	1	2	1
13.4137	-188.216	1	2	1
13.4554	-188.318	1	2	1
13.4971	-189.164	1	2	1
13.5387	-189.827	1	2	1
13.5804	-190.469	1	2	1
13.6221	-191.101	1	2	1
13.6637	-188.338	1	2	1
13.7054	-192.151	1	2	1
13.7471	-192.773	1	2	1
13.7887	-193.384	1	2	1
13.8304	-194.016	1	2	1
13.8721	-194.608	1	2	1
13.9137	-195.27	1	2	1
13.9554	-195.923	1	2	1
13.9971	-196.595	1	2	1
14.0387	-197.238	1	2	1
14.0804	-197.829	1	2	1
14.6202	-201.254	1	2	1
14.6243	-204.179	1	2	1
14.6285	-205.657	1	2	1
14.6327	-189.939	1	2	1
14.6368	-197.339	1	2	1
14.641	-200.183	1	2	1
14.6452	-202.508	1	2	1
14.6493	-204.22	1	2	1
14.6535	-205.454	1	2	1
14.6577	-206.534	1	2	1
14.6931	-208.94	1	2	1
14.7348	-210.285	1	2	1
14.7764	-211.376	1	2	1
14.8181	-212.375	1	2	1
14.8598	-213.231	1	2	1
14.9014	-214.128	1	2	1
14.9431	-215.107	1	2	1
14.9848	-216.147	1	2	1
15.0264	-217.156	1	2	1
15.0681	-218.104	1	2	1
15.1098	-219.052	1	2	1
15.1514	-220.041	1	2	1
15.1931	-221.162	1	2	1
15.2348	-222.212	1	2	1
15.2764	-223.303	1	2	1
15.3181	-224.424	1	2	1
15.3598	-225.566	1	2	1
15.4014	-226.697	1	2	1
15.4431	-227.92	1	2	1
15.4848	-229.103	1	2	1
15.5264	-230.296	1	2	1
15.5681	-231.59	1	2	1
15.6098	-233.007	1	2	1
15.6514	-234.383	1	2	1
15.6931	-235.372	1	2	1
15.707	-235.923	1	2	1
15.7348	-236.942	1	2	1
15.7764	-238.552	1	2	1
15.8181	-240.143	1	2	1
15.8598	-241.733	1	2	1
15.9014	-243.466	1	2	1
15.9431	-245.056	1	2	1
15.9848	-246.707	1	2	1
16.0264	-248.359	1	2	1
16.0681	-250.163	1	2	1
16.1098	-251.886	1	2	1
16.1514	-253.598	1	2	1
16.1931	-255.596	1	2	1
16.2348	-257.36	1	2	1
16.2764	-259.46	1	2	1
16.3181	-261.549	1	2	1
16.3598	-263.609	1	2	1
16.4014	-265.708	1	2	1
16.4431	-268.033	1	2	1
16.4848	-270.469	1	2	1
16.5264	-272.875	1	2	1
16.5681	-275.127	1	2	1
16.6098	-277.931	1	2	1
16.6514	-280.785	1	2	1
16.6931	-283.221	1	2	1
16.7348	-285.27	1	2	1
16.7764	-288.614	1	2	1
16.8181	-292.773	1	2	1
16.8598	-296.606	1	2	1
16.9014	-299.898	1	2	1
16.9431	-303.639	1	2	1
16.9848	-307.39	1	2	1
17.0264	-311.539	1	2	1
17.0681	-315.688	1	2	1
17.1098	-319.766	1	2	1
17.1514	-323.649	1	2	1
17.1931	-328.277	1	2	1
17.2348	-332.895	1	2	1
17.2764	-337.023	1	2	1
17.3181	-341.6	1	2	1
17.3598	-346.799	1	2	1
17.4014	-352.151	1	2	1
17.4431	-356.626	1	2	1
17.4848	-363.231	1	2	1
17.5264	-369.307	1	2	1
17.5681	-375.953	1	2	1
17.6098	-383.18	1	2	1
17.6514	-390.041	1	2	1
17.6931	-397.421	1	2	1
17.7348	-405.148	1	2	1
17.7764	-412.875	1	2	1
17.8181	-421.498	1	2	1
17.8598	-430.01	1	2	1
17.9014	-437.36	1	2	1
17.9431	-449.225	1	2	1
17.9848	-460.02	1	2	1
18.0264	-470.877	1	2	1
18.0681	-482.253	1	2	1
18.1098	-493.68	1	2	1
18.1514	-505.505	1	2	1
18.1931	-518.848	1	2	1
18.2348	-531.692	1	2	1
18.2695	-543.099	1	2	1
19.6258	-8970.44	1	2	1
1.92735	-8.18552	1	1	1
1.93429	-8.31804	1	1	1
1.94124	-8.3792	1	1	1
1.94818	-8.43017	1	1	1
1.95513	-8.50153	1	1	1
1.96207	-8.5525	1	1	1
1.96902	-8.59327	1	1	1
2.01068	-8.93986	1	1	1
2.05235	-9.09276	1	1	1
2.09402	-9.32722	1	1	1
2.13568	-9.53109	1	1	1
2.17735	-9.75535	1	1	1
2.21902	-9.80632	1	1	1
2.26068	-10.0917	1	1	1
2.30235	-10.316	1	1	1
2.34402	-10.4995	1	1	1
2.38568	-10.6728	1	1	1
2.42735	-10.8563	1	1	1
2.46902	-11.0092	1	1	1
2.51068	-11.1621	1	1	1
2.55235	-11.2946	1	1	1
2.59402	-11.4373	1	1	1
2.63568	-11.6208	1	1	1
2.67735	-11.7737	1	1	1
2.71902	-11.9164	1	1	1
2.75281	-12.0999	1	1	1
2.75767	-11.7635	1	1	1
2.76184	-11.8858	1	1	1
2.76601	-11.947	1	1	1
2.77017	-12.0387	1	1	1
2.77434	-12.0897	1	1	1
2.77851	-12.0489	1	1	1
2.78267	-12.1101	1	1	1
2.78684	-12.1509	1	1	1
2.79101	-12.1509	1	1	1
2.80767	-12.212	1	1	1
2.84934	-12.4159	1	1	1
2.89101	-12.579	1	1	1
2.93267	-12.7523	1	1	1
2.97434	-12.8644	1	1	1
3.01601	-12.4975	1	1	1
3.05767	-12.9766	1	1	1
3.09934	-13.0785	1	1	1
3.14101	-13.3333	1	1	1
3.18267	-13.4964	1	1	1
3.22434	-13.6901	1	1	1
3.26601	-13.8634	1	1	1
3.30767	-13.9959	1	1	1
3.34934	-14.1794	1	1	1
3.39101	-14.3119	1	1	1
3.43267	-14.4852	1	1	1
3.47434	-14.6483	1	1	1
3.51601	-14.8216	1	1	1
3.55767	-14.9745	1	1	1
3.59934	-15.0255	1	1	1
3.64101	-15.1886	1	1	1
3.68267	-15.3517	1	1	1
3.72434	-15.525	1	1	1
3.76601	-15.6575	1	1	1
3.80767	-15.79	1	1	1
3.84934	-15.9123	1	1	1
3.89101	-16.0754	1	1	1
3.93267	-16.1978	1	1	1
3.97434	-16.3507	1	1	1
4.01601	-16.4934	1	1	1
4.05767	-16.6565	1	1	1
4.09934	-16.8196	1	1	1
4.14101	-16.9929	1	1	1
4.18267	-17.1254	1	1	1
4.22434	-17.2783	1	1	1
4.26601	-17.4414	1	1	1
4.30767	-17.5841	1	1	1
4.34934	-17.7472	1	1	1
4.39101	-17.8797	1	1	1
4.43267	-18.0326	1	1	1
4.47434	-18.1753	1	1	1
4.51601	-18.318	1	1	1
4.55767	-18.4608	1	1	1
4.59934	-18.6137	1	1	1
4.64101	-18.7666	1	1	1
4.68267	-18.9195	1	1	1
4.72434	-19.1131	1	1	1
4.76601	-19.2253	1	1	1
4.80767	-19.3782	1	1	1
4.85628	-18.5219	1	1	1
4.89795	-19.2966	1	1	1
4.93962	-19.6228	1	1	1
4.98128	-19.8063	1	1	1
5.02295	-20.0102	1	1	1
5.06462	-20.2345	1	1	1
5.10628	-20.4383	1	1	1
5.14795	-20.632	1	1	1
5.18962	-20.8053	1	1	1
5.23128	-20.999	1	1	1
5.27295	-21.1825	1	1	1
5.31462	-21.3761	1	1	1
5.35628	-21.58	1	1	1
5.39795	-21.7737	1	1	1
5.43962	-21.9878	1	1	1
5.48128	-22.1713	1	1	1
5.52295	-22.3751	1	1	1
5.56462	-22.5688	1	1	1
5.60628	-22.7523	1	1	1
5.64795	-22.895	1	1	1
5.68962	-23.0887	1	1	1
5.73128	-23.2722	1	1	1
5.77295	-23.476	1	1	1
5.81462	-23.6697	1	1	1
5.85628	-23.8736	1	1	1
5.89795	-24.1081	1	1	1
5.93962	-24.3119	1	1	1
5.98128	-24.5362	1	1	1
6.02295	-24.7706	1	1	1
6.06462	-24.9949	1	1	1
6.10628	-25.1274	1	1	1
6.14795	-25.4128	1	1	1
6.18962	-25.6677	1	1	1
6.23128	-25.8919	1	1	1
6.27295	-26.1366	1	1	1
6.31462	-26.3609	1	1	1
6.35628	-26.6157	1	1	1
6.39795	-26.8502	1	1	1
6.43962	-27.0948	1	1	1
6.48128	-27.3191	1	1	1
6.52295	-27.5433	1	1	1
6.56462	-27.7574	1	1	1
6.60628	-27.9715	1	1	1
6.64795	-28.2161	1	1	1
6.68962	-28.4709	1	1	1
6.73128	-28.7156	1	1	1
6.77295	-28.9399	1	1	1
6.81462	-29.2151	1	1	1
6.85628	-29.4699	1	1	1
6.89795	-29.7452	1	1	1
6.93962	-30	1	1	1
6.98128	-30.2854	1	1	1
7.02295	-30.581	1	1	1
7.06462	-30.8665	1	1	1
7.10628	-31.1825	1	1	1
7.14795	-31.4985	1	1	1
7.18962	-31.8349	1	1	1
7.23128	-32.1611	1	1	1
7.27295	-32.4771	1	1	1
7.31462	-32.8338	1	1	1
7.35628	-33.1702	1	1	1
7.39795	-33.4964	1	1	1
7.43962	-33.8736	1	1	1
7.48128	-34.2508	1	1	1
7.52295	-34.6381	1	1	1
7.56462	-34.9847	1	1	1
7.60628	-35.3925	1	1	1
7.64795	-35.7696	1	1	1
7.68962	-36.1468	1	1	1
7.73128	-36.5647	1	1	1
7.77295	-36.9929	1	1	1
7.81462	-37.3904	1	1	1
7.85628	-37.8593	1	1	1
7.89795	-38.318	1	1	1
7.93962	-38.7666	1	1	1
7.98128	-39.2049	1	1	1
8.02295	-39.7655	1	1	1
8.06462	-40.3262	1	1	1
8.10628	-40.8869	1	1	1
8.14795	-41.4985	1	1	1
8.18962	-42.0591	1	1	1
8.23128	-42.7013	1	1	1
8.27295	-43.3231	1	1	1
8.31462	-43.9653	1	1	1
8.35628	-44.6075	1	1	1
8.39795	-45.3007	1	1	1
8.43962	-45.9735	1	1	1
8.48128	-46.6667	1	1	1
8.52295	-47.3394	1	1	1
8.56462	-48.0734	1	1	1
8.60628	-48.8379	1	1	1
8.64795	-49.6738	1	1	1
8.68962	-50.4893	1	1	1
8.73128	-51.2232	1	1	1
8.77295	-52.3344	1	1	1
8.81462	-53.3741	1	1	1
8.85628	-54.3221	1	1	1
8.89795	-55.2497	1	1	1
8.93962	-56.4016	1	1	1
8.98128	-57.5739	1	1	1
9.02295	-58.7768	1	1	1
9.06462	-60.0102	1	1	1
9.10628	-61.2946	1	1	1
9.14795	-62.6504	1	1	1
9.18962	-64.0571	1	1	1
9.23128	-65.4842	1	1	1
9.27295	-66.9725	1	1	1
9.31462	-68.4302	1	1	1
9.35628	-69.9898	1	1	1
9.39795	-71.5087	1	1	1
9.43962	-73.1498	1	1	1
9.48128	-74.8114	1	1	1
9.52295	-76.3812	1	1	1
9.56462	-78.0224	1	1	1
9.60628	-79.6942	1	1	1
9.64795	-81.213	1	1	1
9.68962	-82.8135	1	1	1
9.73128	-84.4852	1	1	1
9.77295	-86.1162	1	1	1
9.81462	-87.8695	1	1	1
9.85628	-89.684	1	1	1
9.89795	-91.366	1	1	1
9.93962	-93.262	1	1	1
9.98128	-95.0459	1	1	1
10.023	-96.9521	1	1	1
10.0646	-99.052	1	1	1
10.1063	-101.101	1	1	1
10.148	-103.099	1	1	1
10.1896	-105.24	1	1	1
10.2313	-107.309	1	1	1
10.273	-109.276	1	1	1
10.3146	-111.346	1	1	1
10.3563	-113.364	1	1	1
10.398	-115.392	1	1	1
10.4396	-117.472	1	1	1
10.4813	-119.633	1	1	1
10.523	-121.804	1	1	1
10.5646	-123.986	1	1	1
10.6063	-126.208	1	1	1
10.648	-128.522	1	1	1
10.6896	-130.765	1	1	1
10.7313	-132.987	1	1	1
10.773	-135.26	1	1	1
10.8146	-137.39	1	1	1
10.8563	-139.602	1	1	1
10.898	-141.753	1	1	1
10.9396	-143.721	1	1	1
10.9813	-145.708	1	1	1
11.023	-147.768	1	1	1
11.0646	-149.704	1	1	1
11.1063	-151.631	1	1	1
11.148	-153.323	1	1	1
11.1896	-154.964	1	1	1
11.2313	-156.544	1	1	1
11.273	-158.104	1	1	1
11.3146	-159.572	1	1	1
11.3563	-161.009	1	1	1
11.398	-162.355	1	1	1
11.4396	-163.639	1	1	1
11.4813	-164.811	1	1	1
11.523	-165.943	1	1	1
11.5646	-167.013	1	1	1
11.6132	-168.247	1	1	1
11.6549	-169.225	1	1	1
11.6966	-170.112	1	1	1
11.7382	-170.805	1	1	1
11.7799	-171.315	1	1	1
11.8216	-172.222	1	1	1
11.8632	-173.119	1	1	1
11.9049	-173.863	1	1	1
11.9466	-174.669	1	1	1
11.9882	-175.291	1	1	1
12.0299	-175.953	1	1	1
12.6033	-181.254	1	1	1
12.6075	-182.752	1	1	1
12.6117	-183.619	1	1	1
12.6158	-183.782	1	1	1
12.62	-183.874	1	1	1
12.6242	-183.965	1	1	1
12.6283	-184.057	1	1	1
12.6325	-184.118	1	1	1
12.6367	-184.19	1	1	1
12.6408	-184.251	1	1	1
12.6637	-184.648	1	1	1
12.7054	-185.321	1	1	1
12.7471	-185.994	1	1	1
12.7887	-186.575	1	1	1
12.8304	-187.36	1	1	1
12.8721	-188.155	1	1	1
12.9137	-188.879	1	1	1
12.9554	-189.735	1	1	1
12.9971	-190.581	1	1	1
13.0387	-191.458	1	1	1
13.0804	-192.559	1	1	1
13.1221	-193.629	1	1	1
13.1637	-194.638	1	1	1
13.2054	-195.8	1	1	1
13.2471	-197.003	1	1	1
13.2887	-198.267	1	1	1
13.3304	-199.47	1	1	1
13.3721	-200.856	1	1	1
13.4137	-202.222	1	1	1
13.4554	-203.751	1	1	1
13.4971	-205.382	1	1	1
13.5387	-207.105	1	1	1
13.5804	-208.96	1	1	1
13.6221	-210.938	1	1	1
13.6637	-210.296	1	1	1
13.7054	-214.709	1	1	1
13.7471	-217.034	1	1	1
13.7887	-219.49	1	1	1
13.8304	-221.988	1	1	1
13.8721	-224.822	1	1	1
13.9137	-227.564	1	1	1
13.9554	-230.673	1	1	1
13.9971	-233.894	1	1	1
14.0387	-237.411	1	1	1
14.0804	-240.938	1	1	1
14.6202	-302.813	1	1	1
14.6243	-309.256	1	1	1
14.6285	-313.211	1	1	1
14.6327	-290.866	1	1	1
14.6368	-301.182	1	1	1
14.641	-307.339	1	1	1
14.6452	-312.181	1	1	1
14.6493	-316.29	1	1	1
14.6535	-319.083	1	1	1
14.6577	-321.142	1	1	1
14.6931	-332.966	1	1	1
14.7348	-344.954	1	1	1
14.7764	-357.513	1	1	1
14.8181	-370.306	1	1	1
14.8598	-382.569	1	1	1
14.9014	-396.738	1	1	1
14.9431	-410.622	1	1	1
14.9848	-426.422	1	1	1
15.0264	-443.252	1	1	1
15.0681	-460.734	1	1	1
15.1098	-479.592	1	1	1
15.1514	-500.194	1	1	1
15.1931	-518.349	1	1	1
15.2348	-539.185	1	1	1
15.2764	-563.313	1	1	1
15.3181	-587.747	1	1	1
15.3598	-616.86	1	1	1
15.4014	-647.645	1	1	1
15.4431	-678.909	1	1	1
15.4848	-713.18	1	1	1
15.5264	-747.197	1	1	1
15.5681	-788.716	1	1	1
15.6098	-832.63	1	1	1
15.6514	-879.939	1	1	1
15.6931	-929.684	1	1	1
15.707	-947.625	1	1	1
19.6258	-8970.44	1	1	1
0.748727	0.909386	2	0	100000
1.07792	0.882675	2	0	100000
1.64521	0.839693	2	0	100000
2.21439	0.799474	2	0	100000
2.75258	0.763509	2	0	100000
2.9808	0.748421	2	0	100000
3.64289	0.702939	2	0	100000
3.97619	0.681491	2	0	100000
4.6653	0.638333	2	0	100000
5.16786	0.605789	2	0	100000
5.64286	0.57557	2	0	100000
6.09078	0.546009	2	0	100000
6.74147	0.508596	2	0	100000
7.86161	0.447895	2	0	100000
8.62828	0.406404	2	0	100000
9.59841	0.351798	2	0	100000
9.94147	0.334605	2	0	100000
10.5908	0.300921	2	0	100000
10.9512	0.281974	2	0	100000
11.6012	0.247719	2	0	100000
11.9797	0.228377	2	0	100000
12.5991	0.201272	2	0	100000
13.0213	0.184737	2	0	100000
13.6602	0.161228	2	0	100000
14.0567	0.148289	2	0	100000
14.6186	0.131272	2	0	100000
16.7408	0.0820175	2	0	100000
17.8616	0.0620614	2	0	100000
18.754	0.0484211	2	0	100000
19.0074	0.044693	2	0	100000
19.6567	0.035614	2	0	100000
20.6574	0.0230263	2	0	100000

## Sheet: tens_interpolation
		Datum / Zeit	Tension unten [hPa]	Tension oben [hPa]
m_bot	b_bot	2012-12-11 12:24:20	9.41	11.79
3.37099	-139059	2012-12-11 18:57:20	10.33	12.65
m_top	b_top	2012-12-08 17:54:17	0.0694249	3.05859
3.15115	-129987	y = m*x+b
		AE unten [t]	AE oben [t]
		41227.2
			Brutto-Gewicht [g]	Netto-Gewicht [g]
-1.40314	58626.9	2013-08-23 17:58:52	382.99	12.72
		2013-08-24 10:54:53	382	11.73
-1.40314	58256.7	2013-08-24 06:49:00	382.24	11.9696
			AE unten
m_bot	b_bot	2012-11-12 09:52:24	595.08	28.48
-3.5343	146298	2012-11-15 10:52:20	584.33	17.73
m_top	b_top	2012-11-16 08:39:32	581.122	14.5216
-3.5343	145731	y = m*x+b
