# Supplementary material for: A pore-size classification for peat bogs derived from unsaturated hydraulic properties
Source: Copernicus journal article supplement (doi:10.5194/hess-21-6185-2017), 2017-12-07
Supplement: Supplementary file 13 [file E4_HYDRUS.xlsx]

## Sheet: Gewicht
Datum / Zeit	Brutto-Gewicht [g]	Netto-Gewicht [g]	Gewichtsänderung [g]	Zeit [d]	Theta [-]	Verdunstungsrate [cm/d]		Volumen	251
2013-07-31 15:53:59	610.27	242.07	0					Höhe	5
2013-08-01 07:32:15	603.39	235.19	-6.88	0.651581	0.89239	0.210337		A	50.2
2013-08-01 20:14:37	597.05	228.85	-13.22	1.181	0.867131	0.238554		Theta0	0.919801
2013-08-02 08:34:56	591.84	223.64	-18.43	1.69511	0.846375	0.201872		Trockengewicht	11.2
2013-08-02 12:40:21	590.1	221.9	-20.17	1.86554	0.839442	0.203381		Ks (as in Ksat)
2013-08-02 19:56:49	585.43	217.23	-24.84	2.16864	0.820837	0.30692		delta System [g]	368.2
2013-08-03 07:06:31	579.89	211.69	-30.38	2.63371	0.798765	0.237294
2013-08-03 15:10:02	576.18	207.98	-34.09	2.96949	0.783984	0.220099
2013-08-03 21:15:13	573.24	205.04	-37.03	3.22308	0.772271	0.23094
2013-08-04 10:13:14	568.67	200.47	-41.6	3.76337	0.754064	0.168494
2013-08-04 20:22:43	564.34	196.14	-45.93	4.18663	0.736813	0.203788
2013-08-05 08:40:32	559.73	191.53	-50.54	4.699	0.718446	0.179232
2013-08-05 13:29:10	557.64	189.44	-52.63	4.89944	0.71012	0.207707
2013-08-05 20:46:01	553.58	185.38	-56.69	5.20281	0.693944	0.266598
2013-08-06 07:26:48	549.45	181.25	-60.82	5.64779	0.67749	0.184886
2013-08-06 12:50:04	547.48	179.28	-62.79	5.87229	0.669641	0.174804
2013-08-06 18:18:35	544.51	176.31	-65.76	6.10043	0.657809	0.259331
2013-08-07 08:11:55	539.08	170.88	-71.19	6.67913	0.636175	0.186914
2013-08-07 13:12:23	537.37	169.17	-72.9	6.88779	0.629363	0.163251
2013-08-07 19:37:20	535.18	166.98	-75.09	7.15512	0.620637	0.16319
2013-08-08 08:27:26	531.38	163.18	-78.89	7.6899	0.605498	0.141546
2013-08-08 19:51:38	527.59	159.39	-82.68	8.16504	0.590398	0.158898
2013-08-09 09:35:15	522.23	154.03	-88.04	8.73699	0.569044	0.186682
2013-08-09 13:18:47	520.75	152.55	-89.52	8.89223	0.563147	0.189912
2013-08-09 18:31:55	518.07	149.87	-92.2	9.10969	0.55247	0.245508
2013-08-10 09:24:05	511.12	142.92	-99.15	9.72925	0.524781	0.223459
2013-08-10 17:48:54	507.1	138.9	-103.17	10.0798	0.508765	0.228431
2013-08-11 05:22:46	501.69	133.49	-108.58	10.5617	0.487211	0.223659
2013-08-11 20:25:01	494.5	126.3	-115.77	11.1882	0.458566	0.228591
2013-08-12 08:48:05	488.78	120.58	-121.49	11.7042	0.435777	0.220813
2013-08-12 12:48:25	487.16	118.96	-123.11	11.8711	0.429323	0.193364
2013-08-12 17:59:50	485.08	116.88	-125.19	12.0874	0.421036	0.191592
2013-08-13 08:07:43	479.17	110.97	-131.1	12.6762	0.39749	0.199945
2013-08-13 12:55:42	477.09	108.89	-133.18	12.8762	0.389203	0.207179
2013-08-13 20:03:54	473.83	105.63	-136.44	13.1736	0.376215	0.218389
2013-08-14 07:55:01	468.73	100.53	-141.54	13.6674	0.355896	0.205727
2013-08-14 12:31:45	466.82	98.62	-143.45	13.8596	0.348287	0.197981
2013-08-14 17:59:49	464.45	96.25	-145.82	14.0874	0.338845	0.207223
2013-08-14 18:21:36	464.28	96.08	-145.99	14.1025	0.338167	0.223957
2013-08-15 11:20:26	456.89	88.69	-153.38	14.81	0.308725	0.208064
2013-08-15 16:32:46	454.65	86.45	-155.62	15.0269	0.299801	0.205729
2013-08-15 19:17:28	453.39	85.19	-156.88	15.1413	0.294781	0.219451
2013-08-16 08:59:18	447.75	79.55	-162.52	15.712	0.272311	0.196859
2013-08-16 12:39:09	446.24	78.04	-164.03	15.8647	0.266295	0.19701
2013-08-16 19:23:15	443.05	74.85	-167.22	16.1453	0.253586	0.226443
2013-08-17 09:24:39	437.32	69.12	-172.95	16.7296	0.230757	0.195349
2013-08-17 15:16:23	435.19	66.99	-175.08	16.9739	0.222271	0.173715
2013-08-17 19:24:04	433.61	65.41	-176.66	17.1459	0.215976	0.182988
2013-08-18 09:15:24	429.44	61.24	-180.83	17.7232	0.199363	0.143885
2013-08-18 19:53:41	426.51	58.31	-183.76	18.1665	0.187689	0.131678
2013-08-19 08:14:54	423.48	55.28	-186.79	18.6812	0.175618	0.117261
2013-08-19 15:23:13	421.9	53.7	-188.37	18.9786	0.169323	0.105816
2013-08-19 22:10:58	420.41	52.21	-189.86	19.2618	0.163386	0.104826
2013-08-20 07:40:57	418.33	50.13	-191.94	19.6576	0.1551	0.104676
2013-08-20 19:02:53	415.85	47.65	-194.42	20.1312	0.145219	0.104322
2013-08-21 07:57:55	413.1	44.9	-197.17	20.6694	0.134263	0.101782
2013-08-21 20:33:38	410.6	42.4	-199.67	21.1942	0.124303	0.0948927
2013-08-22 08:34:29	408.61	40.41	-201.66	21.6948	0.116375	0.0791892
2013-08-22 14:41:35	407.59	39.39	-202.68	21.9497	0.112311	0.0797063
2013-08-22 17:33:53	407.07	38.87	-203.2	22.0694	0.110239	0.0865655
2013-08-23 08:53:44	404.77	36.57	-205.5	22.7082	0.101076	0.0717258
2013-08-23 13:01:22	404.17	35.97	-206.1	22.8801	0.0986853	0.0695005
2013-08-23 18:01:41	403.44	35.24	-206.83	23.0887	0.0957769	0.0697291
2013-08-24 10:57:36	401.14	32.94	-209.13	23.7942	0.0866135	0.0649416
2013-08-24 18:57:20	399.99	31.79	-210.28	24.1273	0.0820319	0.0687646
2013-08-25 11:08:57	397.93	29.73	-212.34	24.8021	0.0738247	0.0608181
2013-08-25 22:09:05	396.47	28.27	-213.8	25.2605	0.068008	0.0634413
2013-08-26 08:22:04	395.18	26.98	-215.09	25.6862	0.0628685	0.0603671
2013-08-26 17:33:20	394.04	25.84	-216.23	26.069	0.0583267	0.0593198
2013-08-27 07:48:27	392.38	24.18	-217.89	26.6628	0.0517131	0.0556858
2013-08-27 16:45:30	391.4	23.2	-218.87	27.0358	0.0478088	0.0523448
2013-08-28 08:46:56	389.82	21.62	-220.45	27.7034	0.0415139	0.0471407
2013-08-29 07:05:24	387.83	19.63	-222.44	28.6329	0.0335857	0.0426487
2013-08-29 17:27:02	386.98	18.78	-223.29	29.0646	0.0301992	0.0392232
2013-08-30 09:32:38	385.65	17.45	-224.62	29.7352	0.0249004	0.0395106
2013-08-30 19:50:31	384.78	16.58	-225.49	30.1643	0.0214343	0.0403894
2013-08-31 08:56:54	383.78	15.58	-226.49	30.7104	0.0174502	0.0364776
2013-08-31 18:03:24	383.18	14.98	-227.09	31.0899	0.0150598	0.0314934

## Sheet: Tensionen
Datum / Zeit	Tension unten [hPa]	Tension oben [hPa]	Zeit [d]	Zeit [d]	MP bot(2) [cm]	MP top(1) [cm]	Auswahl	WÄGUNG START
2013-07-29 14:32:20	1.29	4.21		-2.05669	-1.31498	-4.29154	s	41486.7	-914.516
2013-07-29 14:33:20	1.31	4.23		-2.056	-1.33537	-4.31193	s	2013-07-31 15:53:59
2013-07-29 14:34:20	1.34	4.25		-2.0553	-1.36595	-4.33231
2013-07-29 14:35:20	1.36	4.27		-2.05461	-1.38634	-4.3527
2013-07-29 14:36:20	1.19	4.1		-2.05392	-1.21305	-4.17941
2013-07-29 14:37:20	1.22	4.14		-2.05322	-1.24363	-4.22018
2013-07-29 14:38:20	1.25	4.16		-2.05253	-1.27421	-4.24057
2013-07-29 14:39:20	1.28	4.18		-2.05183	-1.30479	-4.26096
2013-07-29 14:40:20	1.79	4.26		-2.05114	-1.82467	-4.34251
2013-07-29 14:41:20	1.04	3.94		-2.05044	-1.06014	-4.01631
2013-07-29 14:42:20	1.06	3.97		-2.04975	-1.08053	-4.04689
2013-07-29 14:43:20	1.09	3.99		-2.04905	-1.11111	-4.06728
2013-07-29 14:44:20	1.11	4.01		-2.04836	-1.1315	-4.08767
2013-07-29 14:45:20	1.14	4.04		-2.04767	-1.16208	-4.11825
2013-07-29 14:46:20	1.15	4.06		-2.04697	-1.17227	-4.13863
2013-07-29 14:47:20	1.16	4.08		-2.04628	-1.18247	-4.15902
2013-07-29 14:48:20	1.17	4.08		-2.04558	-1.19266	-4.15902
2013-07-29 14:49:20	1.19	4.1		-2.04489	-1.21305	-4.17941
2013-07-29 14:50:20	1.2	4.11		-2.04419	-1.22324	-4.1896
2013-07-29 14:51:20	1.22	4.13		-2.0435	-1.24363	-4.20999
2013-07-29 14:52:20	1.23	4.14		-2.0428	-1.25382	-4.22018
2013-07-29 14:53:20	1.25	4.15		-2.04211	-1.27421	-4.23038
2013-07-29 14:54:20	1.33	4.31		-2.04142	-1.35576	-4.39348
2013-07-29 14:55:20	1.16	4.06		-2.04072	-1.18247	-4.13863
2013-07-29 14:56:20	1.08	4		-2.04003	-1.10092	-4.07747
2013-07-29 14:57:20	1.12	4.01		-2.03933	-1.14169	-4.08767
2013-07-29 14:58:20	1.13	4.04		-2.03864	-1.15189	-4.11825
2013-07-29 14:59:20	0.22	3.18		-2.03794	-0.224261	-3.24159
2013-07-29 15:00:20	0.28	3.17		-2.03725	-0.285423	-3.2314
2013-07-29 15:01:20	0.35	3.25		-2.03655	-0.356779	-3.31295
2013-07-29 15:02:20	0.36	3.26		-2.03586	-0.366972	-3.32314
2013-07-29 15:03:20	0.36	3.26		-2.03517	-0.366972	-3.32314
2013-07-29 15:04:20	0.36	3.27		-2.03447	-0.366972	-3.33333
2013-07-29 15:05:20	0.37	3.27		-2.03378	-0.377166	-3.33333
2013-07-29 15:06:20	0.37	3.28		-2.03308	-0.377166	-3.34353
2013-07-29 15:07:20	0.38	3.28		-2.03239	-0.38736	-3.34353
2013-07-29 15:08:20	0.37	3.29		-2.03169	-0.377166	-3.35372
2013-07-29 15:09:20	0.39	3.29		-2.031	-0.397554	-3.35372
2013-07-29 15:10:20	0.38	3.29		-2.0303	-0.38736	-3.35372
2013-07-29 15:11:20	0.39	3.29		-2.02961	-0.397554	-3.35372
2013-07-29 15:12:20	0.39	3.3		-2.02892	-0.397554	-3.36391
2013-07-29 15:13:20	0.4	3.3		-2.02822	-0.407747	-3.36391
2013-07-29 15:14:20	0.4	3.29		-2.02753	-0.407747	-3.35372
2013-07-29 15:15:20	0.4	3.31		-2.02683	-0.407747	-3.37411
2013-07-29 15:16:20	0.4	3.31		-2.02614	-0.407747	-3.37411
2013-07-29 15:17:20	0.41	3.31		-2.02544	-0.417941	-3.37411
2013-07-29 15:18:20	0.4	3.31		-2.02475	-0.407747	-3.37411
2013-07-29 15:19:20	0.41	3.32		-2.02405	-0.417941	-3.3843
2013-07-29 15:20:20	0.41	3.33		-2.02336	-0.417941	-3.3945
2013-07-29 15:21:20	0.42	3.33		-2.02267	-0.428135	-3.3945
2013-07-29 15:22:20	0.42	3.33		-2.02197	-0.428135	-3.3945
2013-07-29 15:23:20	0.42	3.33		-2.02128	-0.428135	-3.3945
2013-07-29 15:24:20	0.42	3.34		-2.02058	-0.428135	-3.40469
2013-07-29 15:25:20	0.43	3.34		-2.01989	-0.438328	-3.40469
2013-07-29 15:26:20	0.43	3.34		-2.01919	-0.438328	-3.40469
2013-07-29 15:27:20	0.43	3.34		-2.0185	-0.438328	-3.40469
2013-07-29 15:28:20	0.43	3.34		-2.0178	-0.438328	-3.40469
2013-07-29 15:29:20	0.44	3.35		-2.01711	-0.448522	-3.41488
2013-07-29 15:30:20	0.45	3.35		-2.01642	-0.458716	-3.41488
2013-07-29 15:31:20	0.45	3.35		-2.01572	-0.458716	-3.41488
2013-07-29 15:32:20	0.45	3.36		-2.01503	-0.458716	-3.42508
2013-07-29 15:42:20	0.48	3.39		-2.00808	-0.489297	-3.45566
2013-07-29 15:52:20	0.52	3.42		-2.00114	-0.530071	-3.48624
2013-07-29 16:02:20	0.56	3.47		-1.99419	-0.570846	-3.53721
2013-07-29 16:12:20	0.58	3.48		-1.98725	-0.591233	-3.5474
2013-07-29 16:22:20	0.65	3.55		-1.9803	-0.662589	-3.61876
2013-07-29 16:32:20	0.7	3.61		-1.97336	-0.713558	-3.67992
2013-07-29 16:42:20	0.77	3.67		-1.96642	-0.784913	-3.74108
2013-07-29 16:52:20	0.84	3.74		-1.95947	-0.856269	-3.81244
2013-07-29 17:02:20	0.37	3.27		-1.95253	-0.377166	-3.33333
2013-07-29 17:12:20	0.38	3.29		-1.94558	-0.38736	-3.35372
2013-07-29 17:22:20	0.39	3.29		-1.93864	-0.397554	-3.35372
2013-07-29 17:32:20	0.39	3.3		-1.93169	-0.397554	-3.36391
2013-07-29 17:42:20	0.41	3.3		-1.92475	-0.417941	-3.36391
2013-07-29 17:52:20	0.4	3.31		-1.9178	-0.407747	-3.37411
2013-07-29 18:02:20	0.39	3.31		-1.91086	-0.397554	-3.37411
2013-07-29 18:12:20	0.41	3.31		-1.90392	-0.417941	-3.37411
2013-07-29 18:22:20	0.4	3.32		-1.89697	-0.407747	-3.3843
2013-07-29 18:32:20	0.4	3.31		-1.89003	-0.407747	-3.37411
2013-07-29 18:42:20	0.41	3.31		-1.88308	-0.417941	-3.37411
2013-07-29 18:52:20	0.41	3.32		-1.87614	-0.417941	-3.3843
2013-07-29 19:02:20	0.48	3.41		-1.86919	-0.489297	-3.47604
2013-07-29 19:12:20	0.47	3.41		-1.86225	-0.479103	-3.47604
2013-07-29 19:22:20	0.47	3.42		-1.8553	-0.479103	-3.48624
2013-07-29 19:32:20	1.11	4.03		-1.84836	-1.1315	-4.10805
2013-07-29 19:42:20	0.84	3.8		-1.84142	-0.856269	-3.8736
2013-07-29 19:52:20	1.41	3.78		-1.83447	-1.43731	-3.85321
2013-07-29 20:02:20	0.87	3.81		-1.82753	-0.88685	-3.88379
2013-07-29 20:12:20	0.89	3.82		-1.82058	-0.907238	-3.89399
2013-07-29 20:22:20	0.91	3.84		-1.81364	-0.927625	-3.91437
2013-07-29 20:32:20	0.95	3.87		-1.80669	-0.9684	-3.94495
2013-07-29 20:42:20	0.97	3.89		-1.79975	-0.988787	-3.96534
2013-07-29 20:52:20	0.99	3.91		-1.7928	-1.00917	-3.98573
2013-07-29 21:02:20	1.03	3.95		-1.78586	-1.04995	-4.0265
2013-07-29 21:12:20	1.06	3.97		-1.77892	-1.08053	-4.04689
2013-07-29 21:22:20	1.08	3.99		-1.77197	-1.10092	-4.06728
2013-07-29 21:32:20	1.08	4		-1.76503	-1.10092	-4.07747
2013-07-29 21:42:20	1.12	4.02		-1.75808	-1.14169	-4.09786
2013-07-29 21:52:20	1.14	4.06		-1.75114	-1.16208	-4.13863
2013-07-29 22:02:20	1.15	4.08		-1.74419	-1.17227	-4.15902
2013-07-29 22:12:20	1.21	4.12		-1.73725	-1.23344	-4.1998
2013-07-29 22:22:20	1.22	4.14		-1.7303	-1.24363	-4.22018
2013-07-29 22:32:20	1.26	4.18		-1.72336	-1.2844	-4.26096
2013-07-29 22:42:20	1.29	4.2		-1.71642	-1.31498	-4.28135
2013-07-29 22:52:20	1.33	4.24		-1.70947	-1.35576	-4.32212
2013-07-29 23:02:20	1.36	4.27		-1.70253	-1.38634	-4.3527
2013-07-29 23:12:20	1.36	4.28		-1.69558	-1.38634	-4.3629
2013-07-29 23:22:20	1.37	4.28		-1.68864	-1.39653	-4.3629
2013-07-29 23:32:20	1.4	4.32		-1.68169	-1.42712	-4.40367
2013-07-29 23:42:20	1.44	4.35		-1.67475	-1.46789	-4.43425
2013-07-29 23:52:20	1.46	4.38		-1.6678	-1.48828	-4.46483
2013-07-30 00:02:20	1.46	4.38		-1.66086	-1.48828	-4.46483
2013-07-30 00:12:20	1.48	4.39		-1.65392	-1.50866	-4.47503
2013-07-30 00:22:20	1.5	4.41		-1.64697	-1.52905	-4.49541
2013-07-30 00:32:20	1.22	4.13		-1.64003	-1.24363	-4.20999
2013-07-30 00:42:20	1.28	4.19		-1.63308	-1.30479	-4.27115
2013-07-30 00:52:20	1.32	4.24		-1.62614	-1.34557	-4.32212
2013-07-30 01:02:20	1.37	4.29		-1.61919	-1.39653	-4.37309
2013-07-30 01:12:20	1.41	4.32		-1.61225	-1.43731	-4.40367
2013-07-30 01:22:20	1.44	4.35		-1.6053	-1.46789	-4.43425
2013-07-30 01:32:20	1.48	4.39		-1.59836	-1.50866	-4.47503
2013-07-30 01:42:20	1.5	4.41		-1.59142	-1.52905	-4.49541
2013-07-30 01:52:20	1.53	4.44		-1.58447	-1.55963	-4.52599
2013-07-30 02:02:20	1.43	4.35		-1.57753	-1.4577	-4.43425
2013-07-30 02:12:20	1.48	4.39		-1.57058	-1.50866	-4.47503
2013-07-30 02:22:20	1.51	4.43		-1.56364	-1.53925	-4.5158
2013-07-30 02:32:20	1.54	4.45		-1.55669	-1.56983	-4.53619
2013-07-30 02:42:20	1.56	4.48		-1.54975	-1.59021	-4.56677
2013-07-30 02:52:20	1.59	4.51		-1.5428	-1.6208	-4.59735
2013-07-30 03:02:20	1.61	4.52		-1.53586	-1.64118	-4.60754
2013-07-30 03:12:20	1.64	4.55		-1.52892	-1.67176	-4.63812
2013-07-30 03:22:20	1.65	4.57		-1.52197	-1.68196	-4.65851
2013-07-30 03:32:20	1.61	4.53		-1.51503	-1.64118	-4.61774
2013-07-30 03:42:20	1.66	4.55		-1.50808	-1.69215	-4.63812
2013-07-30 03:52:20	1.68	4.59		-1.50114	-1.71254	-4.6789
2013-07-30 04:02:20	1.7	4.61		-1.49419	-1.73293	-4.69929
2013-07-30 04:12:20	1.73	4.64		-1.48725	-1.76351	-4.72987
2013-07-30 04:22:20	1.75	4.66		-1.4803	-1.78389	-4.75025
2013-07-30 04:32:20	1.72	4.63		-1.47336	-1.75331	-4.71967
2013-07-30 04:42:20	1.72	4.63		-1.46642	-1.75331	-4.71967
2013-07-30 04:52:20	1.76	4.67		-1.45947	-1.79409	-4.76045
2013-07-30 05:02:20	1.77	4.68		-1.45253	-1.80428	-4.77064
2013-07-30 05:12:20	1.49	4.4		-1.44558	-1.51886	-4.48522
2013-07-30 05:22:20	1.52	4.45		-1.43864	-1.54944	-4.53619
2013-07-30 05:32:20	1.56	4.47		-1.43169	-1.59021	-4.55657
2013-07-30 05:42:20	1.59	4.51		-1.42475	-1.6208	-4.59735
2013-07-30 05:52:20	1.62	4.53		-1.4178	-1.65138	-4.61774
2013-07-30 06:02:20	1.64	4.55		-1.41086	-1.67176	-4.63812
2013-07-30 06:12:20	1.66	4.58		-1.40392	-1.69215	-4.66871
2013-07-30 06:22:20	1.68	4.6		-1.39697	-1.71254	-4.68909
2013-07-30 06:32:20	1.71	4.63		-1.39003	-1.74312	-4.71967
2013-07-30 06:42:20	1.72	4.64		-1.38308	-1.75331	-4.72987
2013-07-30 06:52:20	1.66	4.58		-1.37614	-1.69215	-4.66871
2013-07-30 07:02:20	1.57	4.49		-1.36919	-1.60041	-4.57696
2013-07-30 07:12:20	1.59	4.51		-1.36225	-1.6208	-4.59735
2013-07-30 07:22:20	1.62	4.53		-1.3553	-1.65138	-4.61774
2013-07-30 07:32:20	1.65	4.56		-1.34836	-1.68196	-4.64832
2013-07-30 07:42:20	1.67	4.59		-1.34142	-1.70234	-4.6789
2013-07-30 07:52:20	1.67	4.59		-1.33447	-1.70234	-4.6789
2013-07-30 08:02:20	1.71	4.63		-1.32753	-1.74312	-4.71967
2013-07-30 08:12:20	1.71	4.63		-1.32058	-1.74312	-4.71967
2013-07-30 08:22:20	1.73	4.65		-1.31364	-1.76351	-4.74006
2013-07-30 08:32:20	1.75	4.66		-1.30669	-1.78389	-4.75025
2013-07-30 08:42:20	1.76	4.68		-1.29975	-1.79409	-4.77064
2013-07-30 08:52:20	1.76	4.69		-1.2928	-1.79409	-4.78084
2013-07-30 09:02:20	1.79	4.71		-1.28586	-1.82467	-4.80122
2013-07-30 09:12:20	1.81	4.72		-1.27892	-1.84506	-4.81142
2013-07-30 09:22:20	1.81	4.74		-1.27197	-1.84506	-4.8318
2013-07-30 09:32:20	1.83	4.75		-1.26503	-1.86544	-4.842
2013-07-30 09:42:20	1.86	4.77		-1.25808	-1.89602	-4.86239
2013-07-30 09:52:20	1.87	4.8		-1.25114	-1.90622	-4.89297
2013-07-30 10:02:20	0.53	3.44		-1.24419	-0.540265	-3.50663
2013-07-30 10:12:20	0.61	3.53		-1.23725	-0.621814	-3.59837
2013-07-30 10:22:20	0.66	3.59		-1.2303	-0.672783	-3.65953
2013-07-30 10:32:20	0.23	3.15		-1.22336	-0.234455	-3.21101
2013-07-30 10:42:20	0.33	3.25		-1.21642	-0.336391	-3.31295
2013-07-30 10:52:20	0.38	3.3		-1.20947	-0.38736	-3.36391
2013-07-30 11:02:20	0.44	3.35		-1.20253	-0.448522	-3.41488
2013-07-30 11:12:20	0.48	3.4		-1.19558	-0.489297	-3.46585
2013-07-30 11:22:20	0.51	3.43		-1.18864	-0.519878	-3.49643
2013-07-30 11:32:20	0.54	3.46		-1.18169	-0.550459	-3.52701
2013-07-30 11:42:20	0.59	3.5		-1.17475	-0.601427	-3.56779
2013-07-30 11:52:20	0.57	3.5		-1.1678	-0.58104	-3.56779
2013-07-30 12:02:20	0.6	3.52		-1.16086	-0.611621	-3.58818
2013-07-30 12:12:20	0.61	3.54		-1.15392	-0.621814	-3.60856
2013-07-30 12:22:20	0.64	3.55		-1.14697	-0.652396	-3.61876
2013-07-30 12:32:20	0.66	3.59		-1.14003	-0.672783	-3.65953
2013-07-30 12:42:20	0.69	3.61		-1.13308	-0.703364	-3.67992
2013-07-30 12:52:20	0.72	3.63		-1.12614	-0.733945	-3.70031
2013-07-30 13:02:20	0.73	3.65		-1.11919	-0.744139	-3.72069
2013-07-30 13:12:20	0.75	3.68		-1.11225	-0.764526	-3.75127
2013-07-30 13:22:20	0.78	3.7		-1.1053	-0.795107	-3.77166
2013-07-30 13:32:20	0.8	3.73		-1.09836	-0.815494	-3.80224
2013-07-30 13:42:20	0.84	3.76		-1.09142	-0.856269	-3.83282
2013-07-30 13:52:20	0.87	3.79		-1.08447	-0.88685	-3.8634
2013-07-30 14:02:20	0.75	3.67		-1.07753	-0.764526	-3.74108
2013-07-30 14:12:20	0.77	3.7		-1.07058	-0.784913	-3.77166
2013-07-30 14:22:20	0.8	3.71		-1.06364	-0.815494	-3.78186
2013-07-30 14:32:20	0.83	3.74		-1.05669	-0.846075	-3.81244
2013-07-30 14:42:20	0.84	3.76		-1.04975	-0.856269	-3.83282
2013-07-30 14:52:20	0.87	3.79		-1.0428	-0.88685	-3.8634
2013-07-30 15:02:20	0.89	3.81		-1.03586	-0.907238	-3.88379
2013-07-30 15:12:20	0.91	3.84		-1.02892	-0.927625	-3.91437
2013-07-30 15:22:20	0.94	3.87		-1.02197	-0.958206	-3.94495
2013-07-30 15:32:20	0.96	3.88		-1.01503	-0.978593	-3.95515
2013-07-30 15:42:20	0.97	3.9		-1.00808	-0.988787	-3.97554
2013-07-30 15:52:20	1	3.93		-1.00114	-1.01937	-4.00612
2013-07-30 16:02:20	1.03	3.96		-0.994194	-1.04995	-4.0367
2013-07-30 16:12:20	1.06	3.98		-0.987249	-1.08053	-4.05708
2013-07-30 16:32:20	1.11	4.04		-0.97336	-1.1315	-4.11825
2013-07-30 16:42:20	1.13	4.06		-0.966416	-1.15189	-4.13863
2013-07-30 16:52:20	1.17	4.09		-0.959472	-1.19266	-4.16922
2013-07-30 17:02:20	1.07	3.99		-0.952527	-1.09072	-4.06728
2013-07-30 17:12:20	0.92	3.85		-0.945583	-0.937819	-3.92457
2013-07-30 17:22:20	0.98	3.89		-0.938638	-0.998981	-3.96534
2013-07-30 17:32:20	1.02	3.94		-0.931694	-1.03976	-4.01631
2013-07-30 17:52:20	1.06	3.98		-0.917805	-1.08053	-4.05708
2013-07-30 18:02:20	1.08	4.01		-0.91086	-1.10092	-4.08767
2013-07-30 18:12:20	1.12	4.05		-0.903916	-1.14169	-4.12844
2013-07-30 18:22:20	1.14	4.06		-0.896972	-1.16208	-4.13863
2013-07-30 18:32:20	1.18	4.09		-0.890027	-1.20285	-4.16922
2013-07-30 18:42:20	1.2	4.14		-0.883083	-1.22324	-4.22018
2013-07-30 18:52:20	1.25	4.18		-0.876138	-1.27421	-4.26096
2013-07-30 19:12:20	1.31	4.24		-0.862249	-1.33537	-4.32212
2013-07-30 19:22:20	1.34	4.27		-0.855305	-1.36595	-4.3527
2013-07-30 19:32:20	1.36	4.29		-0.84836	-1.38634	-4.37309
2013-07-30 19:42:20	1.18	4.11		-0.841416	-1.20285	-4.1896
2013-07-30 19:52:20	1.24	4.17		-0.834472	-1.26402	-4.25076
2013-07-30 20:02:20	1.28	4.22		-0.827527	-1.30479	-4.30173
2013-07-30 20:12:20	1.33	4.26		-0.820583	-1.35576	-4.34251
2013-07-30 20:22:20	1.36	4.29		-0.813638	-1.38634	-4.37309
2013-07-30 20:32:20	1.37	4.3		-0.806694	-1.39653	-4.38328
2013-07-30 20:42:20	1.38	4.31		-0.799749	-1.40673	-4.39348
2013-07-30 20:52:20	1.42	4.34		-0.792805	-1.4475	-4.42406
2013-07-30 21:02:20	1.42	4.36		-0.78586	-1.4475	-4.44444
2013-07-30 21:12:20	1.46	4.37		-0.778916	-1.48828	-4.45464
2013-07-30 21:22:20	1.46	4.38		-0.771972	-1.48828	-4.46483
2013-07-30 21:32:20	1.42	4.33		-0.765027	-1.4475	-4.41386
2013-07-30 21:42:20	1.44	4.37		-0.758083	-1.46789	-4.45464
2013-07-30 21:52:20	1.48	4.41		-0.751138	-1.50866	-4.49541
2013-07-30 22:02:20	1.51	4.43		-0.744194	-1.53925	-4.5158
2013-07-30 22:12:20	1.54	4.46		-0.737249	-1.56983	-4.54638
2013-07-30 22:22:20	1.41	4.33		-0.730305	-1.43731	-4.41386
2013-07-30 22:32:20	1.45	4.37		-0.72336	-1.47808	-4.45464
2013-07-30 22:42:20	1.48	4.4		-0.716416	-1.50866	-4.48522
2013-07-30 22:52:20	1.51	4.44		-0.709472	-1.53925	-4.52599
2013-07-30 23:02:20	1.55	4.47		-0.702527	-1.58002	-4.55657
2013-07-30 23:12:20	1.57	4.49		-0.695583	-1.60041	-4.57696
2013-07-30 23:22:20	1.58	4.51		-0.688638	-1.6106	-4.59735
2013-07-30 23:32:20	1.59	4.53		-0.681694	-1.6208	-4.61774
2013-07-30 23:42:20	1.64	4.57		-0.674749	-1.67176	-4.65851
2013-07-30 23:52:20	1.59	4.52		-0.667805	-1.6208	-4.60754
2013-07-31 00:02:20	1.63	4.56		-0.66086	-1.66157	-4.64832
2013-07-31 00:12:20	1.66	4.59		-0.653916	-1.69215	-4.6789
2013-07-31 00:22:20	1.69	4.62		-0.646972	-1.72273	-4.70948
2013-07-31 00:32:20	1.49	4.41		-0.640027	-1.51886	-4.49541
2013-07-31 00:42:20	1.52	4.45		-0.633083	-1.54944	-4.53619
2013-07-31 00:52:20	1.55	4.49		-0.626138	-1.58002	-4.57696
2013-07-31 01:02:20	1.58	4.52		-0.619194	-1.6106	-4.60754
2013-07-31 01:12:20	1.62	4.54		-0.612249	-1.65138	-4.62793
2013-07-31 01:22:20	1.53	4.46		-0.605305	-1.55963	-4.54638
2013-07-31 01:32:20	1.57	4.5		-0.59836	-1.60041	-4.58716
2013-07-31 01:42:20	1.6	4.52		-0.591416	-1.63099	-4.60754
2013-07-31 01:52:20	1.61	4.54		-0.584472	-1.64118	-4.62793
2013-07-31 02:02:20	1.65	4.58		-0.577527	-1.68196	-4.66871
2013-07-31 02:12:20	1.66	4.58		-0.570583	-1.69215	-4.66871
2013-07-31 02:22:20	1.68	4.59		-0.563638	-1.71254	-4.6789
2013-07-31 02:32:20	1.7	4.62		-0.556694	-1.73293	-4.70948
2013-07-31 02:42:20	1.7	4.62		-0.549749	-1.73293	-4.70948
2013-07-31 02:52:20	1.72	4.65		-0.542805	-1.75331	-4.74006
2013-07-31 03:02:20	1.72	4.64		-0.53586	-1.75331	-4.72987
2013-07-31 03:12:20	1.73	4.65		-0.528916	-1.76351	-4.74006
2013-07-31 03:22:20	1.76	4.68		-0.521972	-1.79409	-4.77064
2013-07-31 03:32:20	1.77	4.7		-0.515027	-1.80428	-4.79103
2013-07-31 03:42:20	1.81	4.73		-0.508083	-1.84506	-4.82161
2013-07-31 03:52:20	1.81	4.75		-0.501138	-1.84506	-4.842
2013-07-31 04:02:20	1.84	4.77		-0.494194	-1.87564	-4.86239
2013-07-31 04:12:20	1.81	4.74		-0.487249	-1.84506	-4.8318
2013-07-31 04:22:20	1.81	4.73		-0.480305	-1.84506	-4.82161
2013-07-31 04:32:20	1.83	4.76		-0.47336	-1.86544	-4.85219
2013-07-31 04:42:20	1.86	4.78		-0.466416	-1.89602	-4.87258
2013-07-31 04:52:20	1.89	4.82		-0.459472	-1.92661	-4.91335
2013-07-31 05:02:20	1.9	4.82		-0.452527	-1.9368	-4.91335
2013-07-31 05:12:20	1.92	4.85		-0.445583	-1.95719	-4.94393
2013-07-31 05:22:20	1.83	4.75		-0.438638	-1.86544	-4.842
2013-07-31 05:32:20	1.86	4.79		-0.431694	-1.89602	-4.88277
2013-07-31 05:42:20	1.9	4.82		-0.424749	-1.9368	-4.91335
2013-07-31 05:52:20	1.93	4.86		-0.417805	-1.96738	-4.95413
2013-07-31 06:02:20	1.95	4.87		-0.41086	-1.98777	-4.96432
2013-07-31 06:12:20	1.98	4.91		-0.403916	-2.01835	-5.0051
2013-07-31 06:22:20	1.89	4.82		-0.396972	-1.92661	-4.91335
2013-07-31 06:32:20	1.94	4.86		-0.390027	-1.97757	-4.95413
2013-07-31 06:42:20	1.97	4.89		-0.383083	-2.00815	-4.98471
2013-07-31 06:52:20	2.01	4.93		-0.376138	-2.04893	-5.02548
2013-07-31 07:02:20	2.02	4.95		-0.369194	-2.05912	-5.04587
2013-07-31 07:12:20	2.04	4.97		-0.362249	-2.07951	-5.06626
2013-07-31 07:22:20	2.05	4.98		-0.355305	-2.0897	-5.07645
2013-07-31 07:32:20	2.08	5.01		-0.34836	-2.12029	-5.10703
2013-07-31 07:52:20	2.12	5.05		-0.334472	-2.16106	-5.14781
2013-07-31 08:02:20	2.14	5.07		-0.327527	-2.18145	-5.1682
2013-07-31 08:12:20	2.17	5.09		-0.320583	-2.21203	-5.18858
2013-07-31 08:22:20	1.59	4.53		-0.313638	-1.6208	-4.61774
2013-07-31 08:32:20	1.63	4.55		-0.306694	-1.66157	-4.63812
2013-07-31 08:42:20	1.65	4.58		-0.299749	-1.68196	-4.66871
2013-07-31 08:52:20	1.66	4.58		-0.292805	-1.69215	-4.66871
2013-07-31 09:02:20	0.58	3.5		-0.28586	-0.591233	-3.56779
2013-07-31 09:12:20	0.61	3.54		-0.278916	-0.621814	-3.60856
2013-07-31 09:22:20	0.68	3.59		-0.271972	-0.69317	-3.65953
2013-07-31 09:32:20	0.72	3.65		-0.265027	-0.733945	-3.72069
2013-07-31 09:42:20	0.77	3.7		-0.258083	-0.784913	-3.77166
2013-07-31 09:52:20	0.8	3.73		-0.251138	-0.815494	-3.80224
2013-07-31 10:02:20	0.81	3.75		-0.244194	-0.825688	-3.82263
2013-07-31 10:12:20	0.87	3.79		-0.237249	-0.88685	-3.8634
2013-07-31 10:22:20	0.89	3.82		-0.230305	-0.907238	-3.89399
2013-07-31 10:32:20	0.92	3.85		-0.22336	-0.937819	-3.92457
2013-07-31 10:42:20	0.94	3.87		-0.216416	-0.958206	-3.94495
2013-07-31 10:52:20	-0.13	2.8		-0.209472	0.132518	-2.85423
2013-07-31 11:02:20	-0.04	2.88		-0.202527	0.0407747	-2.93578
2013-07-31 11:12:20	0	2.93		-0.195583	0	-2.98675
2013-07-31 11:22:20	0.05	2.97		-0.188638	-0.0509684	-3.02752
2013-07-31 11:32:20	0.1	3.01		-0.181694	-0.101937	-3.0683
2013-07-31 11:42:20	0.09	3.02		-0.174749	-0.0917431	-3.07849
2013-07-31 11:52:20	0.14	3.07		-0.167805	-0.142712	-3.12946
2013-07-31 12:02:20	0.16	3.09		-0.16086	-0.163099	-3.14985
2013-07-31 12:12:20	0.2	3.12		-0.153916	-0.203874	-3.18043
2013-07-31 12:22:20	0.24	3.16		-0.146972	-0.244648	-3.2212
2013-07-31 12:32:20	0.24	3.17		-0.140027	-0.244648	-3.2314
2013-07-31 12:42:20	0.27	3.2		-0.133083	-0.275229	-3.26198
2013-07-31 12:52:20	0.31	3.24		-0.126138	-0.316004	-3.30275
2013-07-31 13:02:20	0.33	3.25		-0.119194	-0.336391	-3.31295
2013-07-31 13:12:20	0.37	3.29		-0.112249	-0.377166	-3.35372
2013-07-31 13:22:20	0.39	3.32		-0.105305	-0.397554	-3.3843
2013-07-31 13:32:20	0.42	3.35		-0.0983605	-0.428135	-3.41488
2013-07-31 13:42:20	0.45	3.38		-0.091416	-0.458716	-3.44546
2013-07-31 13:52:20	0.47	3.4		-0.0844716	-0.479103	-3.46585
2013-07-31 14:02:20	0.49	3.42		-0.0775271	-0.49949	-3.48624
2013-07-31 14:12:20	0.52	3.45		-0.0705827	-0.530071	-3.51682
2013-07-31 14:22:20	0.55	3.47		-0.0636382	-0.560652	-3.53721
2013-07-31 14:32:20	0.56	3.52		-0.0566938	-0.570846	-3.58818
2013-07-31 14:42:20	0.59	3.51		-0.0497493	-0.601427	-3.57798
2013-07-31 14:46:40	0.59	3.51		-0.0467433	-0.601427	-3.57798
2013-07-31 14:47:40	0.59	3.52		-0.0460489	-0.601427	-3.58818
2013-07-31 14:49:15	0.6	3.52		-0.0449483	-0.611621	-3.58818
2013-07-31 14:50:15	0.6	3.53		-0.0442538	-0.611621	-3.59837
2013-07-31 14:51:15	0.61	3.54		-0.0435594	-0.621814	-3.60856
2013-07-31 14:52:15	0.6	3.53		-0.0428649	-0.611621	-3.59837
2013-07-31 14:53:15	0.61	3.53		-0.0421705	-0.621814	-3.59837
2013-07-31 14:54:15	0.61	3.53		-0.0414761	-0.621814	-3.59837
2013-07-31 14:55:15	0.61	3.54		-0.0407816	-0.621814	-3.60856
2013-07-31 14:56:15	0.6	3.54		-0.0400872	-0.611621	-3.60856
2013-07-31 14:57:15	0.61	3.53		-0.0393927	-0.621814	-3.59837
2013-07-31 14:58:15	0.61	3.53		-0.0386983	-0.621814	-3.59837
2013-07-31 14:59:15	0.62	3.54		-0.0380038	-0.632008	-3.60856
2013-07-31 15:00:15	0.62	3.54		-0.0373094	-0.632008	-3.60856
2013-07-31 15:01:15	0.63	3.56		-0.0366149	-0.642202	-3.62895
2013-07-31 15:02:15	0.62	3.55		-0.0359205	-0.632008	-3.61876
2013-07-31 15:03:15	0.61	3.55		-0.0352261	-0.621814	-3.61876
2013-07-31 15:04:15	0.61	3.54		-0.0345316	-0.621814	-3.60856
2013-07-31 15:05:15	0.62	3.54		-0.0338372	-0.632008	-3.60856
2013-07-31 15:06:15	0.61	3.55		-0.0331427	-0.621814	-3.61876
2013-07-31 15:07:15	0.63	3.56		-0.0324483	-0.642202	-3.62895
2013-07-31 15:08:15	0.62	3.55		-0.0317538	-0.632008	-3.61876
2013-07-31 15:09:15	0.63	3.55		-0.0310594	-0.642202	-3.61876
2013-07-31 15:10:15	0.61	3.54		-0.0303649	-0.621814	-3.60856
2013-07-31 15:11:15	0.63	3.56		-0.0296705	-0.642202	-3.62895
2013-07-31 15:12:15	0.62	3.55		-0.0289761	-0.632008	-3.61876
2013-07-31 15:13:15	0.63	3.55		-0.0282816	-0.642202	-3.61876
2013-07-31 15:14:15	0.62	3.55		-0.0275872	-0.632008	-3.61876
2013-07-31 15:15:15	0.62	3.55		-0.0268927	-0.632008	-3.61876
2013-07-31 15:16:15	0.61	3.54		-0.0261983	-0.621814	-3.60856
2013-07-31 15:17:15	0.65	3.54		-0.0255038	-0.662589	-3.60856
2013-07-31 15:18:15	0.62	3.56		-0.0248094	-0.632008	-3.62895
2013-07-31 15:19:15	0.62	3.55		-0.0241149	-0.632008	-3.61876
2013-07-31 15:20:15	0.62	3.55		-0.0234205	-0.632008	-3.61876
2013-07-31 15:21:15	0.63	3.55		-0.0227261	-0.642202	-3.61876
2013-07-31 15:22:15	0.64	3.56		-0.0220316	-0.652396	-3.62895
2013-07-31 15:23:15	0.63	3.57		-0.0213372	-0.642202	-3.63914
2013-07-31 15:24:15	0.63	3.55		-0.0206427	-0.642202	-3.61876
2013-07-31 15:25:15	0.63	3.57		-0.0199483	-0.642202	-3.63914
2013-07-31 15:26:15	0.63	3.56		-0.0192538	-0.642202	-3.62895
2013-07-31 15:27:15	0.64	3.57		-0.0185594	-0.652396	-3.63914
2013-07-31 15:28:15	0.64	3.57		-0.0178649	-0.652396	-3.63914
2013-07-31 15:29:15	0.64	3.57		-0.0171705	-0.652396	-3.63914
2013-07-31 15:31:15	0.64	3.57		-0.0157816	-0.652396	-3.63914
2013-07-31 15:32:15	0.64	3.58		-0.0150872	-0.652396	-3.64934
2013-07-31 15:33:15	0.64	3.58		-0.0143927	-0.652396	-3.64934
2013-07-31 15:35:15	0.63	3.56		-0.0130038	-0.642202	-3.62895
2013-07-31 15:37:15	0.65	3.57		-0.0116149	-0.662589	-3.63914
2013-07-31 15:38:15	0.64	3.57		-0.0109205	-0.652396	-3.63914
2013-07-31 15:39:15	0.64	3.57		-0.0102261	-0.652396	-3.63914
2013-07-31 15:40:15	0.63	3.58		-0.00953161	-0.642202	-3.64934
2013-07-31 15:41:15	0.65	3.59		-0.00883717	-0.662589	-3.65953
2013-07-31 15:42:15	0.64	3.58		-0.00814272	-0.652396	-3.64934
2013-07-31 15:43:15	0.64	3.58		-0.00744828	-0.652396	-3.64934
2013-07-31 15:44:15	0.65	3.59		-0.00675383	-0.662589	-3.65953
2013-07-31 15:45:15	0.66	3.6		-0.00605939	-0.672783	-3.66972
2013-07-31 15:46:15	0.65	3.58		-0.00536495	-0.662589	-3.64934
2013-07-31 15:47:15	0.64	3.57		-0.0046705	-0.652396	-3.63914
2013-07-31 15:48:15	0.66	3.59		-0.00397606	-0.672783	-3.65953
2013-07-31 15:49:15	0.65	3.59		-0.00328161	-0.662589	-3.65953
2013-07-31 16:09:15	1.8	4.76		0.0106073	-1.83486	-4.85219	2013-07-31 16:09:15	-4.37219	-2.53733
2013-07-31 16:19:15	1.8	4.74		0.0175517	-1.83486	-4.8318		-4.3518
2013-07-31 16:29:15	1.64	4.57		0.0244962	-1.67176	-4.65851	2013-07-31 16:29:15	-4.17851
2013-07-31 16:39:15	1.76	4.69		0.0314406	-1.79409	-4.78084		-4.30084
2013-07-31 16:49:15	1.79	4.72		0.0383851	-1.82467	-4.81142		-4.33142
2013-07-31 16:59:15	1.84	4.78		0.0453295	-1.87564	-4.87258		-4.39258
2013-07-31 17:09:15	1.93	4.87		0.0522739	-1.96738	-4.96432		-4.48432
2013-07-31 17:19:15	2.05	4.99		0.0592184	-2.0897	-5.08665		-4.60665
2013-07-31 17:29:15	2.15	5.09		0.0661628	-2.19164	-5.18858	2013-07-31 17:29:15	-4.70858
2013-07-31 17:39:15	1.75	4.68		0.0731073	-1.78389	-4.77064		-4.29064
2013-07-31 17:49:15	1.86	4.8		0.0800517	-1.89602	-4.89297		-4.41297
2013-07-31 17:59:15	1.89	4.83		0.0869962	-1.92661	-4.92355		-4.44355
2013-07-31 18:09:15	1.98	4.91		0.0939406	-2.01835	-5.0051		-4.5251
2013-07-31 18:19:15	2.03	4.95		0.100885	-2.06932	-5.04587		-4.56587
2013-07-31 18:29:15	2.1	5.05		0.107829	-2.14067	-5.14781	2013-07-31 18:29:15	-4.66781
2013-07-31 18:39:15	2.19	5.13		0.114774	-2.23242	-5.22936		-4.74936
2013-07-31 18:49:15	2.27	5.21		0.121718	-2.31397	-5.31091		-4.83091
2013-07-31 18:59:15	2.32	5.26		0.128663	-2.36493	-5.36188		-4.88188
2013-07-31 19:09:15	2.44	5.36		0.135607	-2.48726	-5.46381		-4.98381
2013-07-31 19:19:15	2.48	5.41		0.142552	-2.52803	-5.51478		-5.03478
2013-07-31 19:29:15	2.47	5.4		0.149496	-2.51784	-5.50459	2013-07-31 19:29:15	-5.02459
2013-07-31 19:39:15	2.53	5.47		0.156441	-2.579	-5.57594		-5.09594
2013-07-31 19:49:15	2.63	5.57		0.163385	-2.68094	-5.67788		-5.19788
2013-07-31 19:59:15	2.7	5.63		0.170329	-2.75229	-5.73904		-5.25904
2013-07-31 20:09:15	2.79	5.7		0.177274	-2.84404	-5.8104		-5.3304
2013-07-31 20:39:15	2.95	5.88		0.198107	-3.00714	-5.99388		-5.51388
2013-07-31 20:49:15	3.04	5.95		0.205052	-3.09888	-6.06524	2013-07-31 20:49:15	-5.58524
2013-07-31 20:59:15	3.12	6.03		0.211996	-3.18043	-6.14679		-5.66679
2013-07-31 21:09:15	3.16	6.06		0.218941	-3.2212	-6.17737		-5.69737
2013-07-31 21:19:15	3.24	6.16		0.225885	-3.30275	-6.27931		-5.79931
2013-07-31 21:29:15	3.31	6.23		0.232829	-3.37411	-6.35066		-5.87066
2013-07-31 21:49:15	3.47	6.36		0.246718	-3.53721	-6.48318		-6.00318
2013-07-31 22:19:15	3.66	6.55		0.267552	-3.73089	-6.67686	2013-07-31 22:19:15	-6.19686
2013-07-31 22:29:15	3.63	6.55		0.274496	-3.70031	-6.67686		-6.19686
2013-07-31 22:39:15	3.65	6.55		0.281441	-3.72069	-6.67686		-6.19686
2013-07-31 22:49:15	3.32	6.22		0.288385	-3.3843	-6.34047		-5.86047
2013-07-31 22:59:15	3.41	6.3		0.295329	-3.47604	-6.42202		-5.94202
2013-07-31 23:09:15	3.52	6.42		0.302274	-3.58818	-6.54434		-6.06434
2013-07-31 23:19:15	3.62	6.53		0.309218	-3.69011	-6.65647	2013-07-31 23:19:15	-6.17647
2013-07-31 23:29:15	3.69	6.59		0.316163	-3.76147	-6.71764		-6.23764
2013-07-31 23:39:15	3.77	6.66		0.323107	-3.84302	-6.78899		-6.30899
2013-07-31 23:49:15	3.85	6.73		0.330052	-3.92457	-6.86035		-6.38035
2013-07-31 23:59:15	3.91	6.8		0.336996	-3.98573	-6.9317		-6.4517
2013-08-01 00:09:15	3.97	6.87		0.343941	-4.04689	-7.00306		-6.52306
2013-08-01 00:19:15	4.05	6.94		0.350885	-4.12844	-7.07441	2013-08-01 00:19:15	-6.59441
2013-08-01 00:29:15	4.14	7.01		0.357829	-4.22018	-7.14577		-6.66577
2013-08-01 00:39:15	4.21	7.05		0.364774	-4.29154	-7.18654		-6.70654
2013-08-01 00:49:15	4.26	7.13		0.371718	-4.34251	-7.26809		-6.78809
2013-08-01 00:59:15	4.34	7.2		0.378663	-4.42406	-7.33945		-6.85945
2013-08-01 01:09:15	4.41	7.25		0.385607	-4.49541	-7.39042		-6.91042
2013-08-01 01:19:15	4.44	7.27		0.392552	-4.52599	-7.41081	2013-08-01 01:19:15	-6.93081
2013-08-01 01:29:15	4.61	7.36		0.399496	-4.69929	-7.50255		-7.02255
2013-08-01 01:39:15	4.64	7.44		0.406441	-4.72987	-7.5841		-7.1041
2013-08-01 01:49:15	4.84	7.49		0.413385	-4.93374	-7.63507		-7.15507
2013-08-01 01:59:15	4.85	7.55		0.420329	-4.94393	-7.69623		-7.21623
2013-08-01 02:09:15	4.98	7.63		0.427274	-5.07645	-7.77778		-7.29778
2013-08-01 02:19:15	5	7.65		0.434218	-5.09684	-7.79817	2013-08-01 02:19:15	-7.31817
2013-08-01 02:29:15	5.09	7.72		0.441163	-5.18858	-7.86952		-7.38952
2013-08-01 02:39:15	5.1	7.74		0.448107	-5.19878	-7.88991		-7.40991
2013-08-01 02:49:15	5.21	7.82		0.455052	-5.31091	-7.97146		-7.49146
2013-08-01 02:59:15	5.27	7.87		0.461996	-5.37207	-8.02243		-7.54243
2013-08-01 03:09:15	5.35	7.93		0.468941	-5.45362	-8.08359		-7.60359
2013-08-01 03:19:15	5.37	7.96		0.475885	-5.47401	-8.11417	2013-08-01 03:19:15	-7.63417
2013-08-01 03:29:15	5.43	8.01		0.482829	-5.53517	-8.16514		-7.68514
2013-08-01 03:39:15	5.49	8.05		0.489774	-5.59633	-8.20591		-7.72591
2013-08-01 03:49:15	5.53	8.08		0.496718	-5.6371	-8.23649		-7.75649
2013-08-01 03:59:15	5.58	8.14		0.503663	-5.68807	-8.29766		-7.81766
2013-08-01 04:09:15	5.61	8.16		0.510607	-5.71865	-8.31804		-7.83804
2013-08-01 04:19:15	5.73	8.27		0.517552	-5.84098	-8.43017	2013-08-01 04:19:15	-7.95017
2013-08-01 04:29:15	5.81	8.34		0.524496	-5.92253	-8.50153		-8.02153
2013-08-01 04:39:15	5.84	8.38		0.531441	-5.95311	-8.5423		-8.0623
2013-08-01 04:49:15	5.93	8.43		0.538385	-6.04485	-8.59327		-8.11327
2013-08-01 04:59:15	5.89	8.38		0.545329	-6.00408	-8.5423		-8.0623
2013-08-01 05:09:15	6.01	8.51		0.552274	-6.1264	-8.67482		-8.19482
2013-08-01 05:19:15	6.08	8.56		0.559218	-6.19776	-8.72579	2013-08-01 05:19:15	-8.24579
2013-08-01 05:29:15	6.13	8.61		0.566163	-6.24873	-8.77676		-8.29676
2013-08-01 05:39:15	6.19	8.66		0.573107	-6.30989	-8.82773		-8.34773
2013-08-01 05:49:15	6.26	8.74		0.580052	-6.38124	-8.90928		-8.42928
2013-08-01 05:59:15	6.26	8.73		0.586996	-6.38124	-8.89908		-8.41908
2013-08-01 06:09:15	6.35	8.82		0.593941	-6.47299	-8.99083		-8.51083
2013-08-01 06:19:15	6.41	8.86		0.600885	-6.53415	-9.0316	2013-08-01 06:19:15	-8.5516
2013-08-01 06:29:15	6.45	8.91		0.607829	-6.57492	-9.08257		-8.60257
2013-08-01 06:39:15	6.48	8.93		0.614774	-6.6055	-9.10296		-8.62296
2013-08-01 06:49:15	6.56	9.01		0.621718	-6.68705	-9.18451		-8.70451
2013-08-01 06:59:15	6.56	8.99		0.628663	-6.68705	-9.16412		-8.68412
2013-08-01 07:09:15	6.63	9.08		0.635607	-6.75841	-9.25586		-8.77586
2013-08-01 07:19:15	6.68	9.13		0.642552	-6.80938	-9.30683	2013-08-01 07:19:15	-8.82683
2013-08-01 07:29:15	6.2	8.65		0.649496	-6.32008	-8.81753		-8.33753
2013-08-01 07:39:15	6.32	8.78		0.656441	-6.44241	-8.95005		-8.47005
2013-08-01 07:49:15	6.45	8.91		0.663385	-6.57492	-9.08257		-8.60257
2013-08-01 07:59:15	6.57	9.02		0.670329	-6.69725	-9.1947		-8.7147
2013-08-01 08:09:15	6.7	9.14		0.677274	-6.82977	-9.31702		-8.83702
2013-08-01 08:19:15	6.77	9.2		0.684218	-6.90112	-9.37819	2013-08-01 08:19:15	-8.89819
2013-08-01 08:29:15	6.84	9.28		0.691163	-6.97248	-9.45973		-8.97973
2013-08-01 08:39:15	6.91	9.35		0.698107	-7.04383	-9.53109		-9.05109
2013-08-01 08:49:15	6.97	9.41		0.705052	-7.10499	-9.59225		-9.11225
2013-08-01 08:59:15	7.02	9.45		0.711996	-7.15596	-9.63303		-9.15303
2013-08-01 09:09:15	7.11	9.56		0.718941	-7.24771	-9.74516		-9.26516
2013-08-01 09:19:15	7.12	9.56		0.725885	-7.2579	-9.74516	2013-08-01 09:19:15	-9.26516
2013-08-01 09:29:15	7.18	9.62		0.732829	-7.31906	-9.80632		-9.32632
2013-08-01 09:39:15	7.23	9.67		0.739774	-7.37003	-9.85729		-9.37729
2013-08-01 09:49:15	7.29	9.73		0.746718	-7.43119	-9.91845		-9.43845
2013-08-01 09:59:15	6.62	9.06		0.753663	-6.74822	-9.23547		-8.75547
2013-08-01 10:19:15	6.79	9.23		0.767552	-6.92151	-9.40877		-8.92877
2013-08-01 10:39:15	7.01	9.45		0.781441	-7.14577	-9.63303	2013-08-01 10:39:15	-9.15303
2013-08-01 10:49:15	7.12	9.56		0.788385	-7.2579	-9.74516		-9.26516
2013-08-01 10:59:15	7.23	9.67		0.795329	-7.37003	-9.85729		-9.37729
2013-08-01 11:09:15	7.3	9.73		0.802274	-7.44139	-9.91845		-9.43845
2013-08-01 11:19:15	7.43	9.85		0.809218	-7.5739	-10.0408		-9.56077
2013-08-01 11:29:15	7.04	9.45		0.816163	-7.17635	-9.63303		-9.15303
2013-08-01 11:49:15	7.33	9.75		0.830052	-7.47197	-9.93884	2013-08-01 11:49:15	-9.45884
2013-08-01 11:59:15	7.41	9.82		0.836996	-7.55352	-10.0102		-9.53019
2013-08-01 12:09:15	7.47	9.88		0.843941	-7.61468	-10.0714		-9.59136
2013-08-01 12:19:15	7.49	9.89		0.850885	-7.63507	-10.0815		-9.60155
2013-08-01 12:29:15	7.58	9.99		0.857829	-7.72681	-10.1835		-9.70349
2013-08-01 12:39:15	7.64	10.05		0.864774	-7.78797	-10.2446		-9.76465
2013-08-01 12:49:15	7.7	10.11		0.871718	-7.84913	-10.3058	2013-08-01 12:49:15	-9.82581
2013-08-01 12:59:15	7.79	10.19		0.878663	-7.94088	-10.3874		-9.90736
2013-08-01 13:09:15	7.81	10.23		0.885607	-7.96126	-10.4281		-9.94813
2013-08-01 13:19:15	7.9	10.29		0.892552	-8.05301	-10.4893		-10.0093
2013-08-01 13:29:15	7.93	10.34		0.899496	-8.08359	-10.5403		-10.0603
2013-08-01 13:39:15	8.02	10.43		0.906441	-8.17533	-10.632		-10.152
2013-08-01 13:49:15	8.11	10.52		0.913385	-8.26707	-10.7238	2013-08-01 13:49:15	-10.2438
2013-08-01 13:59:15	7.94	10.35		0.920329	-8.09378	-10.5505		-10.0705
2013-08-01 14:09:15	8.08	10.49		0.927274	-8.23649	-10.6932		-10.2132
2013-08-01 14:19:15	8.16	10.58		0.934218	-8.31804	-10.7849		-10.3049
2013-08-01 14:29:15	8.18	10.6		0.941163	-8.33843	-10.8053		-10.3253
2013-08-01 14:39:15	8.24	10.66		0.948107	-8.39959	-10.8665		-10.3865
2013-08-01 14:49:15	8.32	10.74		0.955052	-8.48114	-10.948	2013-08-01 14:49:15	-10.468
2013-08-01 14:59:15	8.37	10.79		0.961996	-8.53211	-10.999		-10.519
2013-08-01 15:09:15	8.41	10.83		0.968941	-8.57288	-11.0398		-10.5598
2013-08-01 15:19:15	8.46	10.88		0.975885	-8.62385	-11.0907		-10.6107
2013-08-01 15:29:15	7.25	9.67		0.982829	-7.39042	-9.85729		-9.37729
2013-08-01 15:39:15	7.44	9.86		0.989774	-7.5841	-10.051		-9.57097
2013-08-01 15:49:15	7.64	10.05		0.996718	-7.78797	-10.2446	2013-08-01 15:49:15	-9.76465
2013-08-01 15:59:15	7.79	10.2		1.00366	-7.94088	-10.3976		-9.91755
2013-08-01 16:09:15	8	10.42		1.01061	-8.15494	-10.6218		-10.1418
2013-08-01 16:19:15	8.22	10.64		1.01755	-8.3792	-10.8461		-10.3661
2013-08-01 16:29:15	8.35	10.76		1.0245	-8.51172	-10.9684		-10.4884
2013-08-01 16:39:15	8.48	10.89		1.03144	-8.64424	-11.1009		-10.6209
2013-08-01 16:49:15	8.55	10.96		1.03839	-8.7156	-11.1723	2013-08-01 16:49:15	-10.6923
2013-08-01 16:59:15	8.65	11.05		1.04533	-8.81753	-11.264		-10.784
2013-08-01 17:09:15	8.68	11.09		1.05227	-8.84811	-11.3048		-10.8248
2013-08-01 17:19:15	8.7	11.11		1.05922	-8.8685	-11.3252		-10.8452
2013-08-01 17:29:15	8.61	11.02		1.06616	-8.77676	-11.2334		-10.7534
2013-08-01 17:39:15	8.77	11.18		1.07311	-8.93986	-11.3965		-10.9165
2013-08-01 17:49:15	8.82	11.24		1.08005	-8.99083	-11.4577	2013-08-01 17:49:15	-10.9777
2013-08-01 17:59:15	8.9	11.32		1.087	-9.07238	-11.5392		-11.0592
2013-08-01 18:09:15	8.98	11.41		1.09394	-9.15392	-11.631		-11.151
2013-08-01 18:19:15	8.98	11.41		1.10089	-9.15392	-11.631		-11.151
2013-08-01 18:29:15	9.08	11.5		1.10783	-9.25586	-11.7227		-11.2427
2013-08-01 18:39:15	9.12	11.56		1.11477	-9.29664	-11.7839		-11.3039
2013-08-01 18:49:15	9.22	11.66		1.12172	-9.39857	-11.8858	2013-08-01 18:49:15	-11.4058
2013-08-01 18:59:15	9.27	11.71		1.12866	-9.44954	-11.9368		-11.4568
2013-08-01 19:09:15	9.32	11.75		1.13561	-9.50051	-11.9776		-11.4976
2013-08-01 19:19:15	9.28	11.71		1.14255	-9.45973	-11.9368		-11.4568
2013-08-01 19:29:15	9.13	11.57		1.1495	-9.30683	-11.7941		-11.3141
2013-08-01 19:39:15	9.31	11.75		1.15644	-9.49032	-11.9776		-11.4976
2013-08-01 19:49:15	9.39	11.82		1.16339	-9.57187	-12.0489	2013-08-01 19:49:15	-11.5689
2013-08-01 19:59:15	8.81	11.25		1.17033	-8.98063	-11.4679		-10.9879
2013-08-01 20:09:15	9.07	11.51		1.17727	-9.24567	-11.7329		-11.2529
2013-08-01 20:19:15	8.51	10.97		1.18422	-8.67482	-11.1825		-10.7025
2013-08-01 20:29:15	8.75	11.21		1.19116	-8.91947	-11.4271		-10.9471
2013-08-01 20:39:15	8.9	11.36		1.19811	-9.07238	-11.58		-11.1
2013-08-01 20:49:15	9.02	11.49		1.20505	-9.1947	-11.7125	2013-08-01 20:49:15	-11.2325
2013-08-01 20:59:15	9.15	11.62		1.212	-9.32722	-11.8451		-11.3651
2013-08-01 21:09:15	9.29	11.76		1.21894	-9.46993	-11.9878		-11.5078
2013-08-01 21:19:15	9.2	11.79		1.22589	-9.37819	-12.0183		-11.5383
2013-08-01 21:29:15	9.41	11.9		1.23283	-9.59225	-12.1305		-11.6505
2013-08-01 21:39:15	9.44	11.93		1.23977	-9.62283	-12.1611		-11.6811
2013-08-01 21:49:15	9.32	11.79		1.24672	-9.50051	-12.0183	2013-08-01 21:49:15	-11.5383
2013-08-01 21:59:15	9.45	11.93		1.25366	-9.63303	-12.1611		-11.6811
2013-08-01 22:09:15	9.5	11.98		1.26061	-9.684	-12.212		-11.732
2013-08-01 22:19:15	9.58	12.06		1.26755	-9.76555	-12.2936		-11.8136
2013-08-01 22:29:15	9.6	12.08		1.2745	-9.78593	-12.314		-11.834
2013-08-01 22:39:15	9.67	12.15		1.28144	-9.85729	-12.3853		-11.9053
2013-08-01 22:49:15	9.71	12.2		1.28839	-9.89806	-12.4363	2013-08-01 22:49:15	-11.9563
2013-08-01 22:59:15	9.73	12.22		1.29533	-9.91845	-12.4567		-11.9767
2013-08-01 23:09:15	9.75	12.24		1.30227	-9.93884	-12.4771		-11.9971
2013-08-01 23:19:15	9.81	12.29		1.30922	-10	-12.528		-12.048
2013-08-01 23:29:15	9.84	12.33		1.31616	-10.0306	-12.5688		-12.0888
2013-08-01 23:39:15	9.84	12.34		1.32311	-10.0306	-12.579		-12.099
2013-08-01 23:49:15	9.86	12.36		1.33005	-10.051	-12.5994	2013-08-01 23:49:15	-12.1194
2013-08-01 23:59:15	9.89	12.42		1.337	-10.0815	-12.6606		-12.1806
2013-08-02 00:09:15	9.89	12.4		1.34394	-10.0815	-12.6402		-12.1602
2013-08-02 00:19:15	9.96	12.46		1.35089	-10.1529	-12.7013		-12.2213
2013-08-02 00:29:15	9.99	12.49		1.35783	-10.1835	-12.7319		-12.2519
2013-08-02 00:39:15	10.04	12.56		1.36477	-10.2345	-12.8033		-12.3233
2013-08-02 00:49:15	10.07	12.57		1.37172	-10.265	-12.8135	2013-08-02 00:49:15	-12.3335
2013-08-02 00:59:15	10.08	12.59		1.37866	-10.2752	-12.8338		-12.3538
2013-08-02 01:19:15	10.13	12.65		1.39255	-10.3262	-12.895		-12.415
2013-08-02 01:29:15	10.05	12.71		1.3995	-10.2446	-12.9562		-12.4762
2013-08-02 01:49:15	10.28	12.81		1.41339	-10.4791	-13.0581		-12.5781
2013-08-02 01:59:15	10.06	12.58		1.42033	-10.2548	-12.8236		-12.3436
2013-08-02 02:09:15	10.14	12.66		1.42727	-10.3364	-12.9052	2013-08-02 02:09:15	-12.4252
2013-08-02 02:19:15	10.14	12.66		1.43422	-10.3364	-12.9052		-12.4252
2013-08-02 02:29:15	10.16	12.7		1.44116	-10.3568	-12.946		-12.466
2013-08-02 02:39:15	10.08	12.61		1.44811	-10.2752	-12.8542		-12.3742
2013-08-02 02:49:15	10.21	12.74		1.45505	-10.4077	-12.9867		-12.5067
2013-08-02 02:59:15	10.28	12.81		1.462	-10.4791	-13.0581		-12.5781
2013-08-02 03:09:15	10.35	12.89		1.46894	-10.5505	-13.1397	2013-08-02 03:09:15	-12.6597
2013-08-02 03:19:15	10.35	12.88		1.47589	-10.5505	-13.1295		-12.6495
2013-08-02 03:29:15	10.41	12.94		1.48283	-10.6116	-13.1906		-12.7106
2013-08-02 03:49:15	10.45	12.99		1.49672	-10.6524	-13.2416		-12.7616
2013-08-02 03:59:15	10.47	13.02		1.50366	-10.6728	-13.2722		-12.7922
2013-08-02 04:09:15	10.49	13.02		1.51061	-10.6932	-13.2722		-12.7922
2013-08-02 04:19:15	10.26	12.8		1.51755	-10.4587	-13.0479	2013-08-02 04:19:15	-12.5679
2013-08-02 04:29:15	10.29	12.84		1.5245	-10.4893	-13.0887		-12.6087
2013-08-02 04:39:15	10.45	12.98		1.53144	-10.6524	-13.2314		-12.7514
2013-08-02 04:49:15	10.49	13.04		1.53839	-10.6932	-13.2926		-12.8126
2013-08-02 04:59:15	10.54	13.1		1.54533	-10.7441	-13.3537		-12.8737
2013-08-02 05:09:15	10.56	13.11		1.55227	-10.7645	-13.3639		-12.8839
2013-08-02 05:19:15	10.59	13.15		1.55922	-10.7951	-13.4047	2013-08-02 05:19:15	-12.9247
2013-08-02 05:29:15	10.6	13.16		1.56616	-10.8053	-13.4149		-12.9349
2013-08-02 05:39:15	10.64	13.19		1.57311	-10.8461	-13.4455		-12.9655
2013-08-02 05:49:15	10.71	13.26		1.58005	-10.9174	-13.5168		-13.0368
2013-08-02 05:59:15	10.72	13.27		1.587	-10.9276	-13.527		-13.047
2013-08-02 06:09:15	10.75	13.32		1.59394	-10.9582	-13.578		-13.098
2013-08-02 06:19:15	10.61	13.17		1.60089	-10.8155	-13.4251	2013-08-02 06:19:15	-12.9451
2013-08-02 06:29:15	10.73	13.29		1.60783	-10.9378	-13.5474		-13.0674
2013-08-02 06:39:15	10.73	13.29		1.61477	-10.9378	-13.5474		-13.0674
2013-08-02 06:49:15	10.76	13.33		1.62172	-10.9684	-13.5882		-13.1082
2013-08-02 06:59:15	10.72	13.29		1.62866	-10.9276	-13.5474		-13.0674
2013-08-02 07:09:15	10.8	13.37		1.63561	-11.0092	-13.629		-13.149
2013-08-02 07:19:15	10.86	13.42		1.64255	-11.0703	-13.6799	2013-08-02 07:19:15	-13.1999
2013-08-02 07:29:15	10.9	13.48		1.6495	-11.1111	-13.7411		-13.2611
2013-08-02 07:39:15	10.89	13.46		1.65644	-11.1009	-13.7207		-13.2407
2013-08-02 07:49:15	10.93	13.52		1.66339	-11.1417	-13.7819		-13.3019
2013-08-02 07:59:15	10.97	13.54		1.67033	-11.1825	-13.8022		-13.3222
2013-08-02 08:09:15	11.01	13.58		1.67727	-11.2232	-13.843		-13.363
2013-08-02 08:19:15	11.03	13.62		1.68422	-11.2436	-13.8838	2013-08-02 08:19:15	-13.4038
2013-08-02 08:29:15	11.03	13.61		1.69116	-11.2436	-13.8736		-13.3936
2013-08-02 08:39:15	10.86	13.46		1.69811	-11.0703	-13.7207		-13.2407
2013-08-02 08:49:15	11	13.59		1.70505	-11.213	-13.8532		-13.3732
2013-08-02 08:59:15	11.03	13.62		1.712	-11.2436	-13.8838		-13.4038
2013-08-02 09:09:15	11.1	13.7		1.71894	-11.315	-13.9653		-13.4853
2013-08-02 09:19:15	11.14	13.73		1.72589	-11.3558	-13.9959	2013-08-02 09:19:15	-13.5159
2013-08-02 09:29:15	11.17	13.77		1.73283	-11.3863	-14.0367		-13.5567
2013-08-02 09:39:15	11.21	13.81		1.73977	-11.4271	-14.0775		-13.5975
2013-08-02 09:49:15	11.22	13.82		1.74672	-11.4373	-14.0877		-13.6077
2013-08-02 09:59:15	11.2	13.8		1.75366	-11.4169	-14.0673		-13.5873
2013-08-02 10:09:15	11.26	13.86		1.76061	-11.4781	-14.1284		-13.6484
2013-08-02 10:19:15	11.3	13.9		1.76755	-11.5189	-14.1692	2013-08-02 10:19:15	-13.6892
2013-08-02 10:29:15	11.33	13.94		1.7745	-11.5494	-14.21		-13.73
2013-08-02 10:39:15	11.38	13.99		1.78144	-11.6004	-14.261		-13.781
2013-08-02 10:49:15	11.43	14.03		1.78839	-11.6514	-14.3017		-13.8217
2013-08-02 10:59:15	11.44	14.04		1.79533	-11.6616	-14.3119		-13.8319
2013-08-02 11:09:15	11.45	14.06		1.80227	-11.6718	-14.3323		-13.8523
2013-08-02 11:19:15	11.5	14.1		1.80922	-11.7227	-14.3731	2013-08-02 11:19:15	-13.8931
2013-08-02 11:29:15	11.53	14.13		1.81616	-11.7533	-14.4037		-13.9237
2013-08-02 11:39:15	11.55	14.16		1.82311	-11.7737	-14.4343		-13.9543
2013-08-02 11:49:15	11.58	14.19		1.83005	-11.8043	-14.4648		-13.9848
2013-08-02 11:59:15	11.5	14.11		1.837	-11.7227	-14.3833		-13.9033
2013-08-02 12:09:15	11.44	14.05		1.84394	-11.6616	-14.3221		-13.8421
2013-08-02 12:19:15	11.57	14.17		1.85089	-11.7941	-14.4444	2013-08-02 12:19:15	-13.9644
2013-08-02 12:29:15	11.56	14.17		1.85783	-11.7839	-14.4444		-13.9644
2013-08-02 12:39:15	11.59	14.2		1.86477	-11.8145	-14.475		-13.995
2013-08-02 12:49:15	11.57	14.16		1.87172	-11.7941	-14.4343		-13.9543
2013-08-02 12:59:15	11.73	14.34		1.87866	-11.9572	-14.6177		-14.1377
2013-08-02 13:19:15	11.84	14.44		1.89255	-12.0693	-14.7197		-14.2397
2013-08-02 13:29:15	11.94	14.53		1.8995	-12.1713	-14.8114	2013-08-02 13:29:15	-14.3314
2013-08-02 13:39:15	11.95	14.55		1.90644	-12.1814	-14.8318		-14.3518
2013-08-02 13:49:15	12.02	14.63		1.91339	-12.2528	-14.9134		-14.4334
2013-08-02 13:59:15	12.06	14.66		1.92033	-12.2936	-14.9439		-14.4639
2013-08-02 14:09:15	12.02	14.62		1.92727	-12.2528	-14.9032		-14.4232
2013-08-02 14:19:15	12.13	14.75		1.93422	-12.3649	-15.0357		-14.5557
2013-08-02 14:29:15	12.2	14.81		1.94116	-12.4363	-15.0968	2013-08-02 14:29:15	-14.6168
2013-08-02 14:39:15	12.23	14.84		1.94811	-12.4669	-15.1274		-14.6474
2013-08-02 14:49:15	12.24	14.86		1.95505	-12.4771	-15.1478		-14.6678
2013-08-02 14:59:15	12.31	14.92		1.962	-12.5484	-15.209		-14.729
2013-08-02 15:09:15	12.22	14.84		1.96894	-12.4567	-15.1274		-14.6474
2013-08-02 15:19:15	12.29	14.9		1.97589	-12.528	-15.1886		-14.7086
2013-08-02 15:29:15	12.33	14.95		1.98283	-12.5688	-15.2396	2013-08-02 15:29:15	-14.7596
2013-08-02 15:39:15	12.4	15.03		1.98977	-12.6402	-15.3211		-14.8411
2013-08-02 15:49:15	12.45	15.07		1.99672	-12.6911	-15.3619		-14.8819
2013-08-02 15:59:15	12.5	15.13		2.00366	-12.7421	-15.423		-14.943
2013-08-02 16:09:15	12.57	15.21		2.01061	-12.8135	-15.5046		-15.0246
2013-08-02 16:19:15	12.63	15.26		2.01755	-12.8746	-15.5556		-15.0756
2013-08-02 16:29:15	12.6	15.25		2.0245	-12.844	-15.5454	2013-08-02 16:29:15	-15.0654
2013-08-02 16:39:15	12.63	15.27		2.03144	-12.8746	-15.5657		-15.0857
2013-08-02 16:49:15	12.67	15.3		2.03839	-12.9154	-15.5963		-15.1163
2013-08-02 16:59:15	12.68	15.33		2.04533	-12.9256	-15.6269		-15.1469
2013-08-02 17:09:15	12.77	15.41		2.05227	-13.0173	-15.7085		-15.2285
2013-08-02 17:19:15	12.81	15.45		2.05922	-13.0581	-15.7492		-15.2692
2013-08-02 17:29:15	12.88	15.51		2.06616	-13.1295	-15.8104	2013-08-02 17:29:15	-15.3304
2013-08-02 17:39:15	12.93	15.56		2.07311	-13.1804	-15.8614		-15.3814
2013-08-02 17:49:15	12.99	15.64		2.08005	-13.2416	-15.9429		-15.4629
2013-08-02 17:59:15	13.02	15.66		2.087	-13.2722	-15.9633		-15.4833
2013-08-02 18:09:15	13.07	15.71		2.09394	-13.3231	-16.0143		-15.5343
2013-08-02 18:19:15	13.06	15.69		2.10089	-13.3129	-15.9939		-15.5139
2013-08-02 18:29:15	13.15	15.8		2.10783	-13.4047	-16.106	2013-08-02 18:29:15	-15.626
2013-08-02 18:39:15	13.19	15.84		2.11477	-13.4455	-16.1468		-15.6668
2013-08-02 18:49:15	13.26	15.91		2.12172	-13.5168	-16.2181		-15.7381
2013-08-02 18:59:15	13.33	15.99		2.12866	-13.5882	-16.2997		-15.8197
2013-08-02 19:09:15	13.38	16.02		2.13561	-13.6391	-16.3303		-15.8503
2013-08-02 19:19:15	13.36	16.02		2.14255	-13.6188	-16.3303		-15.8503
2013-08-02 19:29:15	13.23	15.88		2.1495	-13.4862	-16.1876	2013-08-02 19:29:15	-15.7076
2013-08-02 19:39:15	13.4	16.06		2.15644	-13.6595	-16.371		-15.891
2013-08-02 19:49:15	13.47	16.12		2.16339	-13.7309	-16.4322		-15.9522
2013-08-02 19:59:15	13.13	15.93		2.17033	-13.3843	-16.2385		-15.7585
2013-08-02 20:09:15	13.39	16.06		2.17727	-13.6493	-16.371		-15.891
2013-08-02 20:19:15	13.49	16.16		2.18422	-13.7513	-16.473		-15.993
2013-08-02 20:29:15	13.54	16.2		2.19116	-13.8022	-16.5138	2013-08-02 20:29:15	-16.0338
2013-08-02 20:39:15	13.6	16.27		2.19811	-13.8634	-16.5851		-16.1051
2013-08-02 20:49:15	13.66	16.33		2.20505	-13.9246	-16.6463		-16.1663
2013-08-02 20:59:15	13.66	16.35		2.212	-13.9246	-16.6667		-16.1867
2013-08-02 21:09:15	13.5	16.18		2.21894	-13.7615	-16.4934		-16.0134
2013-08-02 21:19:15	13.7	16.37		2.22589	-13.9653	-16.6871		-16.2071
2013-08-02 21:29:15	13.75	16.44		2.23283	-14.0163	-16.7584	2013-08-02 21:29:15	-16.2784
2013-08-02 21:39:15	13.8	16.49		2.23977	-14.0673	-16.8094		-16.3294
2013-08-02 21:49:15	13.84	16.53		2.24672	-14.1081	-16.8502		-16.3702
2013-08-02 21:59:15	13.87	16.56		2.25366	-14.1386	-16.8807		-16.4007
2013-08-02 22:09:15	13.93	16.61		2.26061	-14.1998	-16.9317		-16.4517
2013-08-02 22:19:15	13.85	16.55		2.26755	-14.1182	-16.8705		-16.3905
2013-08-02 22:29:15	13.93	16.63		2.2745	-14.1998	-16.9521	2013-08-02 22:29:15	-16.4721
2013-08-02 22:39:15	13.99	16.69		2.28144	-14.261	-17.0133		-16.5333
2013-08-02 22:49:15	14.02	16.73		2.28839	-14.2915	-17.054		-16.574
2013-08-02 22:59:15	14.07	16.78		2.29533	-14.3425	-17.105		-16.625
2013-08-02 23:09:15	14.11	16.82		2.30227	-14.3833	-17.1458		-16.6658
2013-08-02 23:19:15	14.15	16.87		2.30922	-14.4241	-17.1967		-16.7167
2013-08-02 23:29:15	14.2	16.91		2.31616	-14.475	-17.2375	2013-08-02 23:29:15	-16.7575
2013-08-02 23:39:15	14.17	16.89		2.32311	-14.4444	-17.2171		-16.7371
2013-08-02 23:49:15	14.18	16.9		2.33005	-14.4546	-17.2273		-16.7473
2013-08-02 23:59:15	14.2	16.92		2.337	-14.475	-17.2477		-16.7677
2013-08-03 00:09:15	14.25	16.98		2.34394	-14.526	-17.3089		-16.8289
2013-08-03 00:19:15	14.26	16.99		2.35089	-14.5362	-17.3191		-16.8391
2013-08-03 00:29:15	14.25	16.98		2.35783	-14.526	-17.3089	2013-08-03 00:29:15	-16.8289
2013-08-03 00:39:15	14.3	17.02		2.36477	-14.577	-17.3496		-16.8696
2013-08-03 00:49:15	14.32	17.05		2.37172	-14.5973	-17.3802		-16.9002
2013-08-03 00:59:15	14.35	17.09		2.37866	-14.6279	-17.421		-16.941
2013-08-03 01:09:15	14.37	17.11		2.38561	-14.6483	-17.4414		-16.9614
2013-08-03 01:19:15	14.38	17.11		2.39255	-14.6585	-17.4414		-16.9614
2013-08-03 01:29:15	14.45	17.2		2.3995	-14.7299	-17.5331	2013-08-03 01:29:15	-17.0531
2013-08-03 01:39:15	14.42	17.15		2.40644	-14.6993	-17.4822		-17.0022
2013-08-03 01:49:15	14.47	17.22		2.41339	-14.7503	-17.5535		-17.0735
2013-08-03 01:59:15	14.52	17.26		2.42033	-14.8012	-17.5943		-17.1143
2013-08-03 02:09:15	14.37	17.12		2.42727	-14.6483	-17.4516		-16.9716
2013-08-03 02:19:15	14.47	17.22		2.43422	-14.7503	-17.5535		-17.0735
2013-08-03 02:29:15	14.52	17.27		2.44116	-14.8012	-17.6045	2013-08-03 02:29:15	-17.1245
2013-08-03 02:39:15	14.55	17.3		2.44811	-14.8318	-17.6351		-17.1551
2013-08-03 02:49:15	14.57	17.32		2.45505	-14.8522	-17.6555		-17.1755
2013-08-03 02:59:15	14.6	17.35		2.462	-14.8828	-17.686		-17.206
2013-08-03 03:09:15	14.62	17.38		2.46894	-14.9032	-17.7166		-17.2366
2013-08-03 03:29:15	14.69	17.45		2.48283	-14.9745	-17.788		-17.308
2013-08-03 03:39:15	14.7	17.46		2.48977	-14.9847	-17.7982	2013-08-03 03:39:15	-17.3182
2013-08-03 03:49:15	14.73	17.49		2.49672	-15.0153	-17.8287		-17.3487
2013-08-03 03:59:15	14.77	17.55		2.50366	-15.0561	-17.8899		-17.4099
2013-08-03 04:09:15	14.78	17.55		2.51061	-15.0663	-17.8899		-17.4099
2013-08-03 04:19:15	14.82	17.59		2.51755	-15.107	-17.9307		-17.4507
2013-08-03 04:29:15	14.85	17.61		2.5245	-15.1376	-17.9511		-17.4711
2013-08-03 04:39:15	14.87	17.63		2.53144	-15.158	-17.9715	2013-08-03 04:39:15	-17.4915
2013-08-03 04:49:15	14.92	17.68		2.53839	-15.209	-18.0224		-17.5424
2013-08-03 04:59:15	14.93	17.69		2.54533	-15.2192	-18.0326		-17.5526
2013-08-03 05:09:15	14.96	17.71		2.55227	-15.2497	-18.053		-17.573
2013-08-03 05:19:15	14.95	17.73		2.55922	-15.2396	-18.0734		-17.5934
2013-08-03 05:29:15	14.94	17.72		2.56616	-15.2294	-18.0632		-17.5832
2013-08-03 05:39:15	14.98	17.76		2.57311	-15.2701	-18.104	2013-08-03 05:39:15	-17.624
2013-08-03 05:49:15	14.98	17.75		2.58005	-15.2701	-18.0938		-17.6138
2013-08-03 05:59:15	14.92	17.7		2.587	-15.209	-18.0428		-17.5628
2013-08-03 06:09:15	15	17.79		2.59394	-15.2905	-18.1346		-17.6546
2013-08-03 06:19:15	15.03	17.82		2.60089	-15.3211	-18.1651		-17.6851
2013-08-03 06:29:15	15	17.79		2.60783	-15.2905	-18.1346		-17.6546
2013-08-03 06:39:15	15.07	17.86		2.61477	-15.3619	-18.2059	2013-08-03 06:39:15	-17.7259
2013-08-03 06:49:15	15.09	17.88		2.62172	-15.3823	-18.2263		-17.7463
2013-08-03 06:59:15	15.14	17.94		2.62866	-15.4332	-18.2875		-17.8075
2013-08-03 07:09:15	14.71	17.51		2.63561	-14.9949	-17.8491		-17.3691
2013-08-03 07:19:15	14.89	17.68		2.64255	-15.1784	-18.0224		-17.5424
2013-08-03 07:29:15	14.99	17.78		2.6495	-15.2803	-18.1244		-17.6444
2013-08-03 07:39:15	15.06	17.84		2.65644	-15.3517	-18.1855	2013-08-03 07:39:15	-17.7055
2013-08-03 07:49:15	15.13	17.91		2.66339	-15.423	-18.2569		-17.7769
2013-08-03 07:59:15	15.14	17.94		2.67033	-15.4332	-18.2875		-17.8075
2013-08-03 08:09:15	15.17	17.96		2.67727	-15.4638	-18.3078		-17.8278
2013-08-03 08:19:15	13.97	16.77		2.68422	-14.2406	-17.0948		-16.6148
2013-08-03 08:29:15	14.14	16.94		2.69116	-14.4139	-17.2681		-16.7881
2013-08-03 08:39:15	14.35	17.14		2.69811	-14.6279	-17.472	2013-08-03 08:39:15	-16.992
2013-08-03 08:49:15	14.53	17.32		2.70505	-14.8114	-17.6555		-17.1755
2013-08-03 08:59:15	14.68	17.49		2.712	-14.9643	-17.8287		-17.3487
2013-08-03 09:09:15	14.75	17.55		2.71894	-15.0357	-17.8899		-17.4099
2013-08-03 09:19:15	14.62	17.42		2.72589	-14.9032	-17.7574		-17.2774
2013-08-03 09:29:15	14.77	17.58		2.73283	-15.0561	-17.9205		-17.4405
2013-08-03 09:39:15	14.86	17.68		2.73977	-15.1478	-18.0224	2013-08-03 09:39:15	-17.5424
2013-08-03 09:49:15	14.97	17.79		2.74672	-15.2599	-18.1346		-17.6546
2013-08-03 09:59:15	15	17.81		2.75366	-15.2905	-18.1549		-17.6749
2013-08-03 10:09:15	14.93	17.74		2.76061	-15.2192	-18.0836		-17.6036
2013-08-03 10:19:15	15.04	17.85		2.76755	-15.3313	-18.1957		-17.7157
2013-08-03 10:29:15	15.11	17.93		2.7745	-15.4027	-18.2773		-17.7973
2013-08-03 10:39:15	15.19	18.01		2.78144	-15.4842	-18.3588	2013-08-03 10:39:15	-17.8788
2013-08-03 10:49:15	15.24	18.06		2.78839	-15.5352	-18.4098		-17.9298
2013-08-03 10:59:15	15.28	18.1		2.79533	-15.5759	-18.4506		-17.9706
2013-08-03 11:09:15	15.28	18.11		2.80227	-15.5759	-18.4608		-17.9808
2013-08-03 11:19:15	15.32	18.14		2.80922	-15.6167	-18.4913		-18.0113
2013-08-03 11:29:15	15.33	18.16		2.81616	-15.6269	-18.5117		-18.0317
2013-08-03 11:39:15	15.27	18.09		2.82311	-15.5657	-18.4404	2013-08-03 11:39:15	-17.9604
2013-08-03 11:49:15	15.2	18.02		2.83005	-15.4944	-18.369		-17.889
2013-08-03 11:59:15	15.3	18.15		2.837	-15.5963	-18.5015		-18.0215
2013-08-03 12:09:15	15.36	18.19		2.84394	-15.6575	-18.5423		-18.0623
2013-08-03 12:19:15	15.44	18.27		2.85089	-15.739	-18.6239		-18.1439
2013-08-03 12:29:15	15.43	18.27		2.85783	-15.7288	-18.6239		-18.1439
2013-08-03 12:39:15	15.51	18.33		2.86477	-15.8104	-18.685	2013-08-03 12:39:15	-18.205
2013-08-03 12:49:15	15.51	18.34		2.87172	-15.8104	-18.6952		-18.2152
2013-08-03 12:59:15	15.55	18.39		2.87866	-15.8512	-18.7462		-18.2662
2013-08-03 13:09:15	15.57	18.41		2.88561	-15.8716	-18.7666		-18.2866
2013-08-03 13:19:15	15.62	18.47		2.89255	-15.9225	-18.8277		-18.3477
2013-08-03 13:29:15	15.66	18.5		2.8995	-15.9633	-18.8583		-18.3783
2013-08-03 13:39:15	15.6	18.44		2.90644	-15.9021	-18.7971	2013-08-03 13:39:15	-18.3171
2013-08-03 13:49:15	15.59	18.43		2.91339	-15.8919	-18.787		-18.307
2013-08-03 13:59:15	15.68	18.52		2.92033	-15.9837	-18.8787		-18.3987
2013-08-03 14:09:15	15.74	18.58		2.92727	-16.0449	-18.9399		-18.4599
2013-08-03 14:19:15	15.79	18.64		2.93422	-16.0958	-19.001		-18.521
2013-08-03 14:29:15	15.86	18.71		2.94116	-16.1672	-19.0724		-18.5924
2013-08-03 14:39:15	15.9	18.74		2.94811	-16.208	-19.103	2013-08-03 14:39:15	-18.623
2013-08-03 14:49:15	15.91	18.76		2.95505	-16.2181	-19.1233		-18.6433
2013-08-03 14:59:15	15.95	18.78		2.962	-16.2589	-19.1437		-18.6637
2013-08-03 15:09:15	16.02	18.85		2.96894	-16.3303	-19.2151		-18.7351
2013-08-03 15:19:15	15.91	18.76		2.97589	-16.2181	-19.1233		-18.6433
2013-08-03 15:29:15	16.01	18.87		2.98283	-16.3201	-19.2355		-18.7555
2013-08-03 15:39:15	16.1	18.94		2.98977	-16.4118	-19.3068	2013-08-03 15:39:15	-18.8268
2013-08-03 15:49:15	16.13	18.97		2.99672	-16.4424	-19.3374		-18.8574
2013-08-03 15:59:15	16.15	19		3.00366	-16.4628	-19.368		-18.888
2013-08-03 16:09:15	16.2	19.04		3.01061	-16.5138	-19.4088		-18.9288
2013-08-03 16:19:15	16.15	19		3.01755	-16.4628	-19.368		-18.888
2013-08-03 16:29:15	16.2	19.05		3.0245	-16.5138	-19.419		-18.939
2013-08-03 16:39:15	16.25	19.1		3.03144	-16.5647	-19.4699	2013-08-03 16:39:15	-18.9899
2013-08-03 16:49:15	16.28	19.14		3.03839	-16.5953	-19.5107		-19.0307
2013-08-03 16:59:15	16.35	19.21		3.04533	-16.6667	-19.5821		-19.1021
2013-08-03 17:09:15	16.33	19.19		3.05227	-16.6463	-19.5617		-19.0817
2013-08-03 17:19:15	16.4	19.25		3.05922	-16.7176	-19.6228		-19.1428
2013-08-03 17:29:15	16.43	19.29		3.06616	-16.7482	-19.6636		-19.1836
2013-08-03 17:39:15	16.43	19.29		3.07311	-16.7482	-19.6636	2013-08-03 17:39:15	-19.1836
2013-08-03 17:49:15	16.46	19.32		3.08005	-16.7788	-19.6942		-19.2142
2013-08-03 17:59:15	16.35	19.22		3.087	-16.6667	-19.5923		-19.1123
2013-08-03 18:09:15	16.43	19.3		3.09394	-16.7482	-19.6738		-19.1938
2013-08-03 18:19:15	16.47	19.35		3.10089	-16.789	-19.7248		-19.2448
2013-08-03 18:29:15	16.45	19.32		3.10783	-16.7686	-19.6942		-19.2142
2013-08-03 18:39:15	16.47	19.34		3.11477	-16.789	-19.7146	2013-08-03 18:39:15	-19.2346
2013-08-03 18:49:15	16.44	19.32		3.12172	-16.7584	-19.6942		-19.2142
2013-08-03 18:59:15	16.5	19.37		3.12866	-16.8196	-19.7452		-19.2652
2013-08-03 19:09:15	16.53	19.41		3.13561	-16.8502	-19.7859		-19.3059
2013-08-03 19:19:15	16.54	19.41		3.14255	-16.8603	-19.7859		-19.3059
2013-08-03 19:29:15	16.57	19.44		3.1495	-16.8909	-19.8165		-19.3365
2013-08-03 19:39:15	16.57	19.46		3.15644	-16.8909	-19.8369	2013-08-03 19:39:15	-19.3569
2013-08-03 19:49:15	16.56	19.44		3.16339	-16.8807	-19.8165		-19.3365
2013-08-03 19:59:15	16.63	19.5		3.17033	-16.9521	-19.8777		-19.3977
2013-08-03 20:19:15	16.64	19.51		3.18422	-16.9623	-19.8879		-19.4079
2013-08-03 20:29:15	16.6	19.48		3.19116	-16.9215	-19.8573		-19.3773
2013-08-03 20:39:15	16.67	19.55		3.19811	-16.9929	-19.9286		-19.4486
2013-08-03 20:49:15	16.66	19.55		3.20505	-16.9827	-19.9286	2013-08-03 20:49:15	-19.4486
2013-08-03 20:59:15	16.7	19.57		3.212	-17.0234	-19.949		-19.469
2013-08-03 21:09:15	16.7	19.59		3.21894	-17.0234	-19.9694		-19.4894
2013-08-03 21:19:15	16.33	19.28		3.22589	-16.6463	-19.6534		-19.1734
2013-08-03 21:29:15	16.43	19.3		3.23283	-16.7482	-19.6738		-19.1938
2013-08-03 21:39:15	16.49	19.38		3.23977	-16.8094	-19.7554		-19.2754
2013-08-03 21:49:15	16.61	19.48		3.24672	-16.9317	-19.8573	2013-08-03 21:49:15	-19.3773
2013-08-03 21:59:15	16.63	19.49		3.25366	-16.9521	-19.8675		-19.3875
2013-08-03 22:09:15	16.66	19.54		3.26061	-16.9827	-19.9185		-19.4385
2013-08-03 22:19:15	16.68	19.56		3.26755	-17.0031	-19.9388		-19.4588
2013-08-03 22:29:15	16.69	19.57		3.2745	-17.0133	-19.949		-19.469
2013-08-03 22:39:15	16.74	19.63		3.28144	-17.0642	-20.0102		-19.5302
2013-08-03 22:49:15	16.75	19.63		3.28839	-17.0744	-20.0102	2013-08-03 22:49:15	-19.5302
2013-08-03 22:59:15	16.77	19.67		3.29533	-17.0948	-20.051		-19.571
2013-08-03 23:09:15	16.79	19.68		3.30227	-17.1152	-20.0612		-19.5812
2013-08-03 23:29:15	16.81	19.69		3.31616	-17.1356	-20.0714		-19.5914
2013-08-03 23:39:15	16.82	19.7		3.32311	-17.1458	-20.0815		-19.6015
2013-08-03 23:49:15	16.71	19.6		3.33005	-17.0336	-19.9796		-19.4996
2013-08-03 23:59:15	16.83	19.72		3.337	-17.156	-20.1019	2013-08-03 23:59:15	-19.6219
2013-08-04 00:09:15	16.83	19.72		3.34394	-17.156	-20.1019		-19.6219
2013-08-04 00:19:15	16.88	19.78		3.35089	-17.2069	-20.1631		-19.6831
2013-08-04 00:29:15	16.9	19.78		3.35783	-17.2273	-20.1631		-19.6831
2013-08-04 00:39:15	16.91	19.81		3.36477	-17.2375	-20.1937		-19.7137
2013-08-04 00:49:15	16.92	19.81		3.37172	-17.2477	-20.1937		-19.7137
2013-08-04 00:59:15	16.96	19.86		3.37866	-17.2885	-20.2446	2013-08-04 00:59:15	-19.7646
2013-08-04 01:09:15	16.97	19.85		3.38561	-17.2987	-20.2345		-19.7545
2013-08-04 01:19:15	17.01	19.91		3.39255	-17.3394	-20.2956		-19.8156
2013-08-04 01:29:15	16.77	19.67		3.3995	-17.0948	-20.051		-19.571
2013-08-04 01:39:15	16.92	19.81		3.40644	-17.2477	-20.1937		-19.7137
2013-08-04 01:49:15	16.95	19.85		3.41339	-17.2783	-20.2345		-19.7545
2013-08-04 01:59:15	16.99	19.87		3.42033	-17.3191	-20.2548	2013-08-04 01:59:15	-19.7748
2013-08-04 02:09:15	17.01	19.9		3.42727	-17.3394	-20.2854		-19.8054
2013-08-04 02:19:15	17.05	19.96		3.43422	-17.3802	-20.3466		-19.8666
2013-08-04 02:29:15	17.06	19.96		3.44116	-17.3904	-20.3466		-19.8666
2013-08-04 02:39:15	17.08	19.99		3.44811	-17.4108	-20.3772		-19.8972
2013-08-04 02:49:15	17.06	19.97		3.45505	-17.3904	-20.3568		-19.8768
2013-08-04 02:59:15	17.11	20.01		3.462	-17.4414	-20.3976	2013-08-04 02:59:15	-19.9176
2013-08-04 03:09:15	17.12	20.01		3.46894	-17.4516	-20.3976		-19.9176
2013-08-04 03:19:15	17.13	20.03		3.47589	-17.4618	-20.4179		-19.9379
2013-08-04 03:29:15	17.16	20.06		3.48283	-17.4924	-20.4485		-19.9685
2013-08-04 03:39:15	17.19	20.08		3.48977	-17.5229	-20.4689		-19.9889
2013-08-04 03:49:15	17.22	20.13		3.49672	-17.5535	-20.5199		-20.0399
2013-08-04 03:59:15	17.22	20.12		3.50366	-17.5535	-20.5097	2013-08-04 03:59:15	-20.0297
2013-08-04 04:09:15	17.23	20.13		3.51061	-17.5637	-20.5199		-20.0399
2013-08-04 04:19:15	17.21	20.12		3.51755	-17.5433	-20.5097		-20.0297
2013-08-04 04:29:15	17.25	20.16		3.5245	-17.5841	-20.5505		-20.0705
2013-08-04 04:39:15	17.28	20.18		3.53144	-17.6147	-20.5708		-20.0908
2013-08-04 04:49:15	17.29	20.19		3.53839	-17.6249	-20.581		-20.101
2013-08-04 04:59:15	17.28	20.19		3.54533	-17.6147	-20.581	2013-08-04 04:59:15	-20.101
2013-08-04 05:09:15	17.32	20.22		3.55227	-17.6555	-20.6116		-20.1316
2013-08-04 05:19:15	17.35	20.26		3.55922	-17.686	-20.6524		-20.1724
2013-08-04 05:29:15	17.38	20.28		3.56616	-17.7166	-20.6728		-20.1928
2013-08-04 05:39:15	17.37	20.26		3.57311	-17.7064	-20.6524		-20.1724
2013-08-04 05:49:15	17.42	20.32		3.58005	-17.7574	-20.7136		-20.2336
2013-08-04 05:59:15	17.42	20.33		3.587	-17.7574	-20.7238	2013-08-04 05:59:15	-20.2438
2013-08-04 06:09:15	17.45	20.35		3.59394	-17.788	-20.7441		-20.2641
2013-08-04 06:19:15	17.46	20.36		3.60089	-17.7982	-20.7543		-20.2743
2013-08-04 06:29:15	17.49	20.4		3.60783	-17.8287	-20.7951		-20.3151
2013-08-04 06:39:15	17.51	20.42		3.61477	-17.8491	-20.8155		-20.3355
2013-08-04 06:49:15	17.53	20.45		3.62172	-17.8695	-20.8461		-20.3661
2013-08-04 06:59:15	17.55	20.45		3.62866	-17.8899	-20.8461	2013-08-04 06:59:15	-20.3661
2013-08-04 07:09:15	17.56	20.46		3.63561	-17.9001	-20.8563		-20.3763
2013-08-04 07:19:15	17.56	20.46		3.64255	-17.9001	-20.8563		-20.3763
2013-08-04 07:29:15	17.58	20.49		3.6495	-17.9205	-20.8869		-20.4069
2013-08-04 07:39:15	17.61	20.51		3.65644	-17.9511	-20.9072		-20.4272
2013-08-04 07:49:15	17.62	20.53		3.66339	-17.9613	-20.9276		-20.4476
2013-08-04 07:59:15	17.64	20.55		3.67033	-17.9817	-20.948	2013-08-04 07:59:15	-20.468
2013-08-04 08:09:15	17.67	20.58		3.67727	-18.0122	-20.9786		-20.4986
2013-08-04 08:19:15	17.69	20.59		3.68422	-18.0326	-20.9888		-20.5088
2013-08-04 08:29:15	17.71	20.62		3.69116	-18.053	-21.0194		-20.5394
2013-08-04 08:39:15	17.74	20.64		3.69811	-18.0836	-21.0398		-20.5598
2013-08-04 08:49:15	17.75	20.66		3.70505	-18.0938	-21.0601		-20.5801
2013-08-04 08:59:15	17.79	20.69		3.712	-18.1346	-21.0907	2013-08-04 08:59:15	-20.6107
2013-08-04 09:09:15	17.78	20.69		3.71894	-18.1244	-21.0907		-20.6107
2013-08-04 09:19:15	17.84	20.75		3.72589	-18.1855	-21.1519		-20.6719
2013-08-04 09:29:15	17.85	20.75		3.73283	-18.1957	-21.1519		-20.6719
2013-08-04 09:39:15	17.88	20.78		3.73977	-18.2263	-21.1825		-20.7025
2013-08-04 09:49:15	17.9	20.81		3.74672	-18.2467	-21.213		-20.733
2013-08-04 09:59:15	17.88	20.8		3.75366	-18.2263	-21.2029	2013-08-04 09:59:15	-20.7229
2013-08-04 10:09:15	17.87	20.78		3.76061	-18.2161	-21.1825		-20.7025
2013-08-04 10:19:15	17.49	20.38		3.76755	-17.8287	-20.7747		-20.2947
2013-08-04 10:29:15	17.63	20.53		3.7745	-17.9715	-20.9276		-20.4476
2013-08-04 10:39:15	17.69	20.59		3.78144	-18.0326	-20.9888		-20.5088
2013-08-04 10:49:15	17.78	20.69		3.78839	-18.1244	-21.0907		-20.6107
2013-08-04 10:59:15	17.9	20.79		3.79533	-18.2467	-21.1927	2013-08-04 10:59:15	-20.7127
2013-08-04 11:09:15	17.9	20.78		3.80227	-18.2467	-21.1825		-20.7025
2013-08-04 11:19:15	17.96	20.86		3.80922	-18.3078	-21.264		-20.784
2013-08-04 11:29:15	17.99	20.88		3.81616	-18.3384	-21.2844		-20.8044
2013-08-04 11:39:15	18.01	20.91		3.82311	-18.3588	-21.315		-20.835
2013-08-04 11:49:15	18.04	20.94		3.83005	-18.3894	-21.3456		-20.8656
2013-08-04 11:59:15	18.07	20.96		3.837	-18.42	-21.366	2013-08-04 11:59:15	-20.886
2013-08-04 12:19:15	18.13	21.02		3.85089	-18.4811	-21.4271		-20.9471
2013-08-04 12:29:15	18.1	21		3.85783	-18.4506	-21.4067		-20.9267
2013-08-04 12:39:15	18.16	21.05		3.86477	-18.5117	-21.4577		-20.9777
2013-08-04 12:49:15	18.18	21.07		3.87172	-18.5321	-21.4781		-20.9981
2013-08-04 12:59:15	18.22	21.12		3.87866	-18.5729	-21.5291		-21.0491
2013-08-04 13:09:15	18.19	21.1		3.88561	-18.5423	-21.5087	2013-08-04 13:09:15	-21.0287
2013-08-04 13:19:15	18.26	21.16		3.89255	-18.6137	-21.5698		-21.0898
2013-08-04 13:29:15	18.25	21.14		3.8995	-18.6035	-21.5494		-21.0694
2013-08-04 13:39:15	18.3	21.19		3.90644	-18.6544	-21.6004		-21.1204
2013-08-04 13:49:15	18.3	21.21		3.91339	-18.6544	-21.6208		-21.1408
2013-08-04 13:59:15	18.32	21.22		3.92033	-18.6748	-21.631		-21.151
2013-08-04 14:09:15	18.36	21.26		3.92727	-18.7156	-21.6718	2013-08-04 14:09:15	-21.1918
2013-08-04 14:19:15	18.37	21.28		3.93422	-18.7258	-21.6922		-21.2122
2013-08-04 14:29:15	18.4	21.3		3.94116	-18.7564	-21.7125		-21.2325
2013-08-04 14:39:15	18.42	21.32		3.94811	-18.7768	-21.7329		-21.2529
2013-08-04 14:49:15	18.47	21.36		3.95505	-18.8277	-21.7737		-21.2937
2013-08-04 14:59:15	18.51	21.4		3.962	-18.8685	-21.8145		-21.3345
2013-08-04 15:09:15	18.51	21.4		3.96894	-18.8685	-21.8145	2013-08-04 15:09:15	-21.3345
2013-08-04 15:19:15	18.53	21.43		3.97589	-18.8889	-21.8451		-21.3651
2013-08-04 15:29:15	18.58	21.47		3.98283	-18.9399	-21.8858		-21.4058
2013-08-04 15:39:15	18.59	21.49		3.98977	-18.9501	-21.9062		-21.4262
2013-08-04 15:49:15	18.62	21.51		3.99672	-18.9806	-21.9266		-21.4466
2013-08-04 15:59:15	18.62	21.53		4.00366	-18.9806	-21.947		-21.467
2013-08-04 16:09:15	18.56	21.46		4.01061	-18.9195	-21.8756	2013-08-04 16:09:15	-21.3956
2013-08-04 16:19:15	18.63	21.53		4.01755	-18.9908	-21.947		-21.467
2013-08-04 16:29:15	18.67	21.56		4.0245	-19.0316	-21.9776		-21.4976
2013-08-04 16:39:15	18.72	21.61		4.03144	-19.0826	-22.0285		-21.5485
2013-08-04 16:49:15	18.76	21.66		4.03839	-19.1233	-22.0795		-21.5995
2013-08-04 16:59:15	18.79	21.69		4.04533	-19.1539	-22.1101		-21.6301
2013-08-04 17:09:15	18.79	21.68		4.05227	-19.1539	-22.0999	2013-08-04 17:09:15	-21.6199
2013-08-04 17:19:15	18.83	21.72		4.05922	-19.1947	-22.1407		-21.6607
2013-08-04 17:29:15	18.84	21.73		4.06616	-19.2049	-22.1509		-21.6709
2013-08-04 17:39:15	18.87	21.75		4.07311	-19.2355	-22.1713		-21.6913
2013-08-04 17:49:15	18.93	21.82		4.08005	-19.2966	-22.2426		-21.7626
2013-08-04 17:59:15	18.94	21.84		4.087	-19.3068	-22.263		-21.783
2013-08-04 18:09:15	18.98	21.87		4.09394	-19.3476	-22.2936	2013-08-04 18:09:15	-21.8136
2013-08-04 18:19:15	18.98	21.88		4.10089	-19.3476	-22.3038		-21.8238
2013-08-04 18:29:15	19.03	21.92		4.10783	-19.3986	-22.3445		-21.8645
2013-08-04 18:39:15	19.07	21.96		4.11477	-19.4393	-22.3853		-21.9053
2013-08-04 18:49:15	19.09	21.99		4.12172	-19.4597	-22.4159		-21.9359
2013-08-04 18:59:15	19.13	22.03		4.12866	-19.5005	-22.4567		-21.9767
2013-08-04 19:09:15	19.16	22.04		4.13561	-19.5311	-22.4669	2013-08-04 19:09:15	-21.9869
2013-08-04 19:19:15	19.15	22.05		4.14255	-19.5209	-22.4771		-21.9971
2013-08-04 19:29:15	19.16	22.05		4.1495	-19.5311	-22.4771		-21.9971
2013-08-04 19:39:15	19.2	22.09		4.15644	-19.5719	-22.5178		-22.0378
2013-08-04 19:49:15	19.22	22.12		4.16339	-19.5923	-22.5484		-22.0684
2013-08-04 19:59:15	19.25	22.15		4.17033	-19.6228	-22.579		-22.099
2013-08-04 20:09:15	19.3	22.21		4.17727	-19.6738	-22.6402	2013-08-04 20:09:15	-22.1602
2013-08-04 20:19:15	19.29	22.19		4.18422	-19.6636	-22.6198		-22.1398
2013-08-04 20:29:15	19	21.95		4.19116	-19.368	-22.3751		-21.8951
2013-08-04 20:39:15	19.13	22.05		4.19811	-19.5005	-22.4771		-21.9971
2013-08-04 20:49:15	19.23	22.14		4.20505	-19.6024	-22.5688		-22.0888
2013-08-04 20:59:15	19.28	22.19		4.212	-19.6534	-22.6198		-22.1398
2013-08-04 21:09:15	19.35	22.27		4.21894	-19.7248	-22.7013	2013-08-04 21:09:15	-22.2213
2013-08-04 21:19:15	19.36	22.28		4.22589	-19.735	-22.7115		-22.2315
2013-08-04 21:29:15	19.38	22.3		4.23283	-19.7554	-22.7319		-22.2519
2013-08-04 21:39:15	19.43	22.34		4.23977	-19.8063	-22.7727		-22.2927
2013-08-04 21:49:15	19.37	22.27		4.24672	-19.7452	-22.7013		-22.2213
2013-08-04 21:59:15	19.44	22.36		4.25366	-19.8165	-22.7931		-22.3131
2013-08-04 22:09:15	19.45	22.37		4.26061	-19.8267	-22.8033	2013-08-04 22:09:15	-22.3233
2013-08-04 22:19:15	19.47	22.37		4.26755	-19.8471	-22.8033		-22.3233
2013-08-04 22:29:15	19.49	22.4		4.2745	-19.8675	-22.8338		-22.3538
2013-08-04 22:39:15	19.49	22.39		4.28144	-19.8675	-22.8236		-22.3436
2013-08-04 22:49:15	19.52	22.42		4.28839	-19.8981	-22.8542		-22.3742
2013-08-04 22:59:15	19.52	22.43		4.29533	-19.8981	-22.8644		-22.3844
2013-08-04 23:09:15	19.54	22.45		4.30227	-19.9185	-22.8848	2013-08-04 23:09:15	-22.4048
2013-08-04 23:19:15	19.56	22.47		4.30922	-19.9388	-22.9052		-22.4252
2013-08-04 23:29:15	19.59	22.5		4.31616	-19.9694	-22.9358		-22.4558
2013-08-04 23:39:15	19.58	22.48		4.32311	-19.9592	-22.9154		-22.4354
2013-08-04 23:49:15	19.6	22.51		4.33005	-19.9796	-22.946		-22.466
2013-08-04 23:59:15	19.63	22.54		4.337	-20.0102	-22.9766		-22.4966
2013-08-05 00:09:15	19.61	22.52		4.34394	-19.9898	-22.9562	2013-08-05 00:09:15	-22.4762
2013-08-05 00:19:15	19.67	22.59		4.35089	-20.051	-23.0275		-22.5475
2013-08-05 00:29:15	19.68	22.58		4.35783	-20.0612	-23.0173		-22.5373
2013-08-05 00:39:15	19.72	22.64		4.36477	-20.1019	-23.0785		-22.5985
2013-08-05 00:49:15	19.73	22.64		4.37172	-20.1121	-23.0785		-22.5985
2013-08-05 00:59:15	19.75	22.66		4.37866	-20.1325	-23.0989		-22.6189
2013-08-05 01:09:15	19.77	22.68		4.38561	-20.1529	-23.1193	2013-08-05 01:09:15	-22.6393
2013-08-05 01:19:15	19.78	22.7		4.39255	-20.1631	-23.1397		-22.6597
2013-08-05 01:29:15	19.55	22.45		4.3995	-19.9286	-22.8848		-22.4048
2013-08-05 01:39:15	19.66	22.57		4.40644	-20.0408	-23.0071		-22.5271
2013-08-05 01:49:15	19.72	22.63		4.41339	-20.1019	-23.0683		-22.5883
2013-08-05 01:59:15	19.8	22.69		4.42033	-20.1835	-23.1295		-22.6495
2013-08-05 02:09:15	19.8	22.72		4.42727	-20.1835	-23.16	2013-08-05 02:09:15	-22.68
2013-08-05 02:19:15	19.8	22.71		4.43422	-20.1835	-23.1498		-22.6698
2013-08-05 02:29:15	19.83	22.74		4.44116	-20.2141	-23.1804		-22.7004
2013-08-05 02:39:15	19.84	22.76		4.44811	-20.2243	-23.2008		-22.7208
2013-08-05 02:49:15	19.85	22.76		4.45505	-20.2345	-23.2008		-22.7208
2013-08-05 02:59:15	19.91	22.82		4.462	-20.2956	-23.262		-22.782
2013-08-05 03:09:15	19.91	22.82		4.46894	-20.2956	-23.262	2013-08-05 03:09:15	-22.782
2013-08-05 03:19:15	19.95	22.85		4.47589	-20.3364	-23.2926		-22.8126
2013-08-05 03:29:15	19.97	22.89		4.48283	-20.3568	-23.3333		-22.8533
2013-08-05 03:39:15	19.97	22.88		4.48977	-20.3568	-23.3231		-22.8431
2013-08-05 03:49:15	20	22.91		4.49672	-20.3874	-23.3537		-22.8737
2013-08-05 03:59:15	20	22.91		4.50366	-20.3874	-23.3537		-22.8737
2013-08-05 04:09:15	20.05	22.96		4.51061	-20.4383	-23.4047	2013-08-05 04:09:15	-22.9247
2013-08-05 04:19:15	20.07	22.97		4.51755	-20.4587	-23.4149		-22.9349
2013-08-05 04:29:15	20.08	22.99		4.5245	-20.4689	-23.4353		-22.9553
2013-08-05 04:39:15	20.08	22.99		4.53144	-20.4689	-23.4353		-22.9553
2013-08-05 04:49:15	20.14	23.04		4.53839	-20.5301	-23.4862		-23.0062
2013-08-05 04:59:15	20.14	23.05		4.54533	-20.5301	-23.4964		-23.0164
2013-08-05 05:09:15	20.17	23.08		4.55227	-20.5607	-23.527	2013-08-05 05:09:15	-23.047
2013-08-05 05:19:15	20.19	23.11		4.55922	-20.581	-23.5576		-23.0776
2013-08-05 05:29:15	20.23	23.15		4.56616	-20.6218	-23.5984		-23.1184
2013-08-05 05:39:15	20.24	23.15		4.57311	-20.632	-23.5984		-23.1184
2013-08-05 05:49:15	20.25	23.17		4.58005	-20.6422	-23.6188		-23.1388
2013-08-05 05:59:15	20.28	23.19		4.587	-20.6728	-23.6391		-23.1591
2013-08-05 06:09:15	20.28	23.2		4.59394	-20.6728	-23.6493	2013-08-05 06:09:15	-23.1693
2013-08-05 06:19:15	20.33	23.25		4.60089	-20.7238	-23.7003		-23.2203
2013-08-05 06:29:15	20.31	23.22		4.60783	-20.7034	-23.6697		-23.1897
2013-08-05 06:39:15	20.33	23.24		4.61477	-20.7238	-23.6901		-23.2101
2013-08-05 06:49:15	20.36	23.28		4.62172	-20.7543	-23.7309		-23.2509
2013-08-05 06:59:15	20.36	23.28		4.62866	-20.7543	-23.7309		-23.2509
2013-08-05 07:09:15	20.33	23.24		4.63561	-20.7238	-23.6901	2013-08-05 07:09:15	-23.2101
2013-08-05 07:19:15	20.42	23.33		4.64255	-20.8155	-23.7819		-23.3019
2013-08-05 07:29:15	20.43	23.33		4.6495	-20.8257	-23.7819		-23.3019
2013-08-05 07:39:15	20.44	23.35		4.65644	-20.8359	-23.8022		-23.3222
2013-08-05 07:49:15	20.45	23.35		4.66339	-20.8461	-23.8022		-23.3222
2013-08-05 07:59:15	20.48	23.39		4.67033	-20.8767	-23.843		-23.363
2013-08-05 08:09:15	20.46	23.37		4.67727	-20.8563	-23.8226	2013-08-05 08:09:15	-23.3426
2013-08-05 08:19:15	20.49	23.41		4.68422	-20.8869	-23.8634		-23.3834
2013-08-05 08:29:15	20.52	23.42		4.69116	-20.9174	-23.8736		-23.3936
2013-08-05 08:39:15	20.55	23.47		4.69811	-20.948	-23.9246		-23.4446
2013-08-05 08:49:15	20.43	23.34		4.70505	-20.8257	-23.792		-23.312
2013-08-05 08:59:15	20.51	23.42		4.712	-20.9072	-23.8736		-23.3936
2013-08-05 09:09:15	20.56	23.47		4.71894	-20.9582	-23.9246	2013-08-05 09:09:15	-23.4446
2013-08-05 09:19:15	20.57	23.49		4.72589	-20.9684	-23.945		-23.465
2013-08-05 09:29:15	20.62	23.53		4.73283	-21.0194	-23.9857		-23.5057
2013-08-05 09:39:15	20.68	23.58		4.73977	-21.0805	-24.0367		-23.5567
2013-08-05 09:49:15	20.68	23.59		4.74672	-21.0805	-24.0469		-23.5669
2013-08-05 09:59:15	20.73	23.64		4.75366	-21.1315	-24.0979		-23.6179
2013-08-05 10:09:15	20.74	23.66		4.76061	-21.1417	-24.1182	2013-08-05 10:09:15	-23.6382
2013-08-05 10:19:15	20.78	23.69		4.76755	-21.1825	-24.1488		-23.6688
2013-08-05 10:29:15	20.79	23.7		4.7745	-21.1927	-24.159		-23.679
2013-08-05 10:39:15	20.82	23.73		4.78144	-21.2232	-24.1896		-23.7096
2013-08-05 10:49:15	20.84	23.76		4.78839	-21.2436	-24.2202		-23.7402
2013-08-05 10:59:15	20.88	23.8		4.79533	-21.2844	-24.261		-23.781
2013-08-05 11:09:15	20.91	23.83		4.80227	-21.315	-24.2915	2013-08-05 11:09:15	-23.8115
2013-08-05 11:19:15	20.94	23.85		4.80922	-21.3456	-24.3119		-23.8319
2013-08-05 11:29:15	20.96	23.88		4.81616	-21.366	-24.3425		-23.8625
2013-08-05 11:39:15	21.02	23.94		4.82311	-21.4271	-24.4037		-23.9237
2013-08-05 11:49:15	21.04	23.95		4.83005	-21.4475	-24.4139		-23.9339
2013-08-05 11:59:15	21.08	24		4.837	-21.4883	-24.4648		-23.9848
2013-08-05 12:09:15	21.08	23.99		4.84394	-21.4883	-24.4546	2013-08-05 12:09:15	-23.9746
2013-08-05 12:19:15	21.11	24.03		4.85089	-21.5189	-24.4954		-24.0154
2013-08-05 12:29:15	21.14	24.06		4.85783	-21.5494	-24.526		-24.046
2013-08-05 12:39:15	21.16	24.07		4.86477	-21.5698	-24.5362		-24.0562
2013-08-05 12:49:15	21.17	24.08		4.87172	-21.58	-24.5464		-24.0664
2013-08-05 12:59:15	21.17	24.09		4.87866	-21.58	-24.5566		-24.0766
2013-08-05 13:09:15	21.16	24.09		4.88561	-21.5698	-24.5566	2013-08-05 13:09:15	-24.0766
2013-08-05 13:19:15	21.24	24.15		4.89255	-21.6514	-24.6177		-24.1377
2013-08-05 13:29:15	20.98	23.96		4.8995	-21.3863	-24.4241		-23.9441
2013-08-05 13:39:15	21.02	23.94		4.90644	-21.4271	-24.4037		-23.9237
2013-08-05 13:49:15	21.11	24.04		4.91339	-21.5189	-24.5056		-24.0256
2013-08-05 13:59:15	21.25	24.17		4.92033	-21.6616	-24.6381		-24.1581
2013-08-05 14:09:15	21.28	24.19		4.92727	-21.6922	-24.6585	2013-08-05 14:09:15	-24.1785
2013-08-05 14:19:15	21.26	24.18		4.93422	-21.6718	-24.6483		-24.1683
2013-08-05 14:29:15	21.36	24.29		4.94116	-21.7737	-24.7604		-24.2804
2013-08-05 14:39:15	21.37	24.31		4.94811	-21.7839	-24.7808		-24.3008
2013-08-05 14:49:15	21.44	24.36		4.95505	-21.8552	-24.8318		-24.3518
2013-08-05 14:59:15	21.46	24.38		4.962	-21.8756	-24.8522		-24.3722
2013-08-05 15:09:15	21.5	24.42		4.96894	-21.9164	-24.893	2013-08-05 15:09:15	-24.413
2013-08-05 15:19:15	21.52	24.45		4.97589	-21.9368	-24.9235		-24.4435
2013-08-05 15:29:15	21.57	24.49		4.98283	-21.9878	-24.9643		-24.4843
2013-08-05 15:59:15	21.67	24.6		5.00366	-22.0897	-25.0765		-24.5965
2013-08-05 16:09:15	21.71	24.64		5.01061	-22.1305	-25.1172		-24.6372
2013-08-05 16:19:15	21.75	24.67		5.01755	-22.1713	-25.1478		-24.6678
2013-08-05 16:29:15	21.81	24.73		5.0245	-22.2324	-25.209	2013-08-05 16:29:15	-24.729
2013-08-05 16:39:15	21.82	24.76		5.03144	-22.2426	-25.2396		-24.7596
2013-08-05 16:49:15	21.87	24.79		5.03839	-22.2936	-25.2701		-24.7901
2013-08-05 16:59:15	21.91	24.83		5.04533	-22.3344	-25.3109		-24.8309
2013-08-05 17:09:15	21.98	24.89		5.05227	-22.4057	-25.3721		-24.8921
2013-08-05 17:19:15	22.02	24.95		5.05922	-22.4465	-25.4332		-24.9532
2013-08-05 17:29:15	22.05	24.98		5.06616	-22.4771	-25.4638	2013-08-05 17:29:15	-24.9838
2013-08-05 17:39:15	22.08	25.01		5.07311	-22.5076	-25.4944		-25.0144
2013-08-05 17:49:15	22.12	25.05		5.08005	-22.5484	-25.5352		-25.0552
2013-08-05 17:59:15	22.18	25.1		5.087	-22.6096	-25.5861		-25.1061
2013-08-05 18:09:15	22.21	25.13		5.09394	-22.6402	-25.6167		-25.1367
2013-08-05 18:19:15	22.25	25.18		5.10089	-22.6809	-25.6677		-25.1877
2013-08-05 18:29:15	22.3	25.21		5.10783	-22.7319	-25.6983	2013-08-05 18:29:15	-25.2183
2013-08-05 18:39:15	22.3	25.21		5.11477	-22.7319	-25.6983		-25.2183
2013-08-05 18:49:15	22.34	25.25		5.12172	-22.7727	-25.739		-25.259
2013-08-05 18:59:15	22.37	25.29		5.12866	-22.8033	-25.7798		-25.2998
2013-08-05 19:09:15	22.4	25.33		5.13561	-22.8338	-25.8206		-25.3406
2013-08-05 19:19:15	22.41	25.36		5.14255	-22.844	-25.8512		-25.3712
2013-08-05 19:29:15	22.48	25.4		5.1495	-22.9154	-25.8919	2013-08-05 19:29:15	-25.4119
2013-08-05 19:39:15	22.52	25.44		5.15644	-22.9562	-25.9327		-25.4527
2013-08-05 19:49:15	22.53	25.45		5.16339	-22.9664	-25.9429		-25.4629
2013-08-05 19:59:15	22.56	25.48		5.17033	-22.9969	-25.9735		-25.4935
2013-08-05 20:09:15	22.59	25.51		5.17727	-23.0275	-26.0041		-25.5241
2013-08-05 20:19:15	22.62	25.54		5.18422	-23.0581	-26.0347		-25.5547
2013-08-05 20:29:15	22.63	25.55		5.19116	-23.0683	-26.0449	2013-08-05 20:29:15	-25.5649
2013-08-05 20:39:15	22.65	25.58		5.19811	-23.0887	-26.0754		-25.5954
2013-08-05 20:49:15	22.42	25.36		5.20505	-22.8542	-25.8512		-25.3712
2013-08-05 20:59:15	22.55	25.5		5.212	-22.9867	-25.9939		-25.5139
2013-08-05 21:09:15	22.62	25.55		5.21894	-23.0581	-26.0449		-25.5649
2013-08-05 21:19:15	22.64	25.58		5.22589	-23.0785	-26.0754		-25.5954
2013-08-05 21:29:15	22.7	25.62		5.23283	-23.1397	-26.1162	2013-08-05 21:29:15	-25.6362
2013-08-05 21:39:15	22.72	25.66		5.23977	-23.16	-26.157		-25.677
2013-08-05 21:49:15	22.72	25.66		5.24672	-23.16	-26.157		-25.677
2013-08-05 21:59:15	22.75	25.7		5.25366	-23.1906	-26.1978		-25.7178
2013-08-05 22:09:15	22.78	25.72		5.26061	-23.2212	-26.2181		-25.7381
2013-08-05 22:19:15	22.82	25.75		5.26755	-23.262	-26.2487		-25.7687
2013-08-05 22:29:15	22.87	25.8		5.2745	-23.3129	-26.2997	2013-08-05 22:29:15	-25.8197
2013-08-05 22:39:15	22.88	25.82		5.28144	-23.3231	-26.3201		-25.8401
2013-08-05 22:49:15	22.9	25.82		5.28839	-23.3435	-26.3201		-25.8401
2013-08-05 22:59:15	22.94	25.87		5.29533	-23.3843	-26.371		-25.891
2013-08-05 23:09:15	22.93	25.86		5.30227	-23.3741	-26.3609		-25.8809
2013-08-05 23:19:15	22.95	25.88		5.30922	-23.3945	-26.3812		-25.9012
2013-08-05 23:29:15	22.98	25.93		5.31616	-23.4251	-26.4322	2013-08-05 23:29:15	-25.9522
2013-08-05 23:39:15	22.98	25.91		5.32311	-23.4251	-26.4118		-25.9318
2013-08-05 23:49:15	23.01	25.94		5.33005	-23.4557	-26.4424		-25.9624
2013-08-05 23:59:15	22.97	25.9		5.337	-23.4149	-26.4016		-25.9216
2013-08-06 00:09:15	23	25.94		5.34394	-23.4455	-26.4424		-25.9624
2013-08-06 00:19:15	23.04	25.97		5.35089	-23.4862	-26.473		-25.993
2013-08-06 00:29:15	23.06	25.98		5.35783	-23.5066	-26.4832	2013-08-06 00:29:15	-26.0032
2013-08-06 00:39:15	23.07	25.99		5.36477	-23.5168	-26.4934		-26.0134
2013-08-06 00:49:15	23.04	25.97		5.37172	-23.4862	-26.473		-25.993
2013-08-06 00:59:15	23.06	25.99		5.37866	-23.5066	-26.4934		-26.0134
2013-08-06 01:09:15	23.07	26.01		5.38561	-23.5168	-26.5138		-26.0338
2013-08-06 01:19:15	23.13	26.07		5.39255	-23.578	-26.5749		-26.0949
2013-08-06 01:29:15	23.12	26.05		5.3995	-23.5678	-26.5545	2013-08-06 01:29:15	-26.0745
2013-08-06 01:39:15	23.15	26.09		5.40644	-23.5984	-26.5953		-26.1153
2013-08-06 01:49:15	23.15	26.08		5.41339	-23.5984	-26.5851		-26.1051
2013-08-06 01:59:15	23.18	26.12		5.42033	-23.629	-26.6259		-26.1459
2013-08-06 02:09:15	23.19	26.14		5.42727	-23.6391	-26.6463		-26.1663
2013-08-06 02:19:15	23.21	26.14		5.43422	-23.6595	-26.6463		-26.1663
2013-08-06 02:29:15	23.25	26.19		5.44116	-23.7003	-26.6972	2013-08-06 02:29:15	-26.2172
2013-08-06 02:39:15	23.23	26.17		5.44811	-23.6799	-26.6769		-26.1969
2013-08-06 02:49:15	23.26	26.19		5.45505	-23.7105	-26.6972		-26.2172
2013-08-06 02:59:15	23.27	26.19		5.462	-23.7207	-26.6972		-26.2172
2013-08-06 03:09:15	23.29	26.23		5.46894	-23.7411	-26.738		-26.258
2013-08-06 03:19:15	23.3	26.24		5.47589	-23.7513	-26.7482		-26.2682
2013-08-06 03:29:15	23.33	26.26		5.48283	-23.7819	-26.7686	2013-08-06 03:29:15	-26.2886
2013-08-06 03:39:15	23.33	26.28		5.48977	-23.7819	-26.789		-26.309
2013-08-06 03:49:15	23.35	26.3		5.49672	-23.8022	-26.8094		-26.3294
2013-08-06 03:59:15	23.37	26.31		5.50366	-23.8226	-26.8196		-26.3396
2013-08-06 04:09:15	23.36	26.3		5.51061	-23.8124	-26.8094		-26.3294
2013-08-06 04:19:15	23.36	26.27		5.51755	-23.8124	-26.7788		-26.2988
2013-08-06 04:29:15	23.41	26.34		5.5245	-23.8634	-26.8502	2013-08-06 04:29:15	-26.3702
2013-08-06 04:39:15	23.4	26.32		5.53144	-23.8532	-26.8298		-26.3498
2013-08-06 04:49:15	23.4	26.33		5.53839	-23.8532	-26.84		-26.36
2013-08-06 04:59:15	23.45	26.38		5.54533	-23.9042	-26.8909		-26.4109
2013-08-06 05:09:15	23.46	26.4		5.55227	-23.9144	-26.9113		-26.4313
2013-08-06 05:19:15	23.48	26.42		5.55922	-23.9348	-26.9317		-26.4517
2013-08-06 05:29:15	23.48	26.42		5.56616	-23.9348	-26.9317	2013-08-06 05:29:15	-26.4517
2013-08-06 05:39:15	23.48	26.41		5.57311	-23.9348	-26.9215		-26.4415
2013-08-06 05:49:15	23.48	26.43		5.58005	-23.9348	-26.9419		-26.4619
2013-08-06 05:59:15	23.51	26.45		5.587	-23.9653	-26.9623		-26.4823
2013-08-06 06:09:15	23.51	26.45		5.59394	-23.9653	-26.9623		-26.4823
2013-08-06 06:19:15	23.51	26.44		5.60089	-23.9653	-26.9521		-26.4721
2013-08-06 06:29:15	23.53	26.47		5.60783	-23.9857	-26.9827	2013-08-06 06:29:15	-26.5027
2013-08-06 06:39:15	23.56	26.5		5.61477	-24.0163	-27.0133		-26.5333
2013-08-06 06:49:15	23.57	26.51		5.62172	-24.0265	-27.0234		-26.5434
2013-08-06 06:59:15	23.6	26.53		5.62866	-24.0571	-27.0438		-26.5638
2013-08-06 07:09:15	23.59	26.54		5.63561	-24.0469	-27.054		-26.574
2013-08-06 07:19:15	23.62	26.56		5.64255	-24.0775	-27.0744		-26.5944
2013-08-06 07:29:15	23.45	26.5		5.6495	-23.9042	-27.0133	2013-08-06 07:29:15	-26.5333
2013-08-06 07:39:15	23.64	26.59		5.65644	-24.0979	-27.105		-26.625
2013-08-06 07:49:15	23.66	26.6		5.66339	-24.1182	-27.1152		-26.6352
2013-08-06 07:59:15	23.66	26.6		5.67033	-24.1182	-27.1152		-26.6352
2013-08-06 08:09:15	23.69	26.63		5.67727	-24.1488	-27.1458		-26.6658
2013-08-06 08:19:15	23.69	26.64		5.68422	-24.1488	-27.156		-26.676
2013-08-06 08:29:15	23.74	26.68		5.69116	-24.1998	-27.1967	2013-08-06 08:29:15	-26.7167
2013-08-06 08:39:15	23.73	26.68		5.69811	-24.1896	-27.1967		-26.7167
2013-08-06 08:49:15	23.77	26.71		5.70505	-24.2304	-27.2273		-26.7473
2013-08-06 08:59:15	23.79	26.73		5.712	-24.2508	-27.2477		-26.7677
2013-08-06 09:09:15	23.8	26.75		5.71894	-24.261	-27.2681		-26.7881
2013-08-06 09:19:15	23.86	26.79		5.72589	-24.3221	-27.3089		-26.8289
2013-08-06 09:29:15	23.85	26.8		5.73283	-24.3119	-27.3191	2013-08-06 09:29:15	-26.8391
2013-08-06 09:39:15	23.89	26.83		5.73977	-24.3527	-27.3496		-26.8696
2013-08-06 09:49:15	23.88	26.83		5.74672	-24.3425	-27.3496		-26.8696
2013-08-06 09:59:15	23.91	26.85		5.75366	-24.3731	-27.37		-26.89
2013-08-06 10:09:15	23.91	26.86		5.76061	-24.3731	-27.3802		-26.9002
2013-08-06 10:19:15	23.95	26.88		5.76755	-24.4139	-27.4006		-26.9206
2013-08-06 10:29:15	23.97	26.93		5.7745	-24.4343	-27.4516	2013-08-06 10:29:15	-26.9716
2013-08-06 10:39:15	23.98	26.93		5.78144	-24.4444	-27.4516		-26.9716
2013-08-06 10:49:15	24.04	26.98		5.78839	-24.5056	-27.5025		-27.0225
2013-08-06 10:59:15	24.07	27.02		5.79533	-24.5362	-27.5433		-27.0633
2013-08-06 11:09:15	24.07	27.01		5.80227	-24.5362	-27.5331		-27.0531
2013-08-06 11:19:15	24.11	27.03		5.80922	-24.577	-27.5535		-27.0735
2013-08-06 11:29:15	24.12	27.06		5.81616	-24.5872	-27.5841	2013-08-06 11:29:15	-27.1041
2013-08-06 11:39:15	24.14	27.08		5.82311	-24.6075	-27.6045		-27.1245
2013-08-06 11:49:15	24.15	27.1		5.83005	-24.6177	-27.6249		-27.1449
2013-08-06 11:59:15	24.2	27.14		5.837	-24.6687	-27.6656		-27.1856
2013-08-06 12:09:15	24.21	27.16		5.84394	-24.6789	-27.686		-27.206
2013-08-06 12:19:15	24.25	27.18		5.85089	-24.7197	-27.7064		-27.2264
2013-08-06 12:29:15	24.25	27.19		5.85783	-24.7197	-27.7166	2013-08-06 12:29:15	-27.2366
2013-08-06 12:39:15	24.27	27.22		5.86477	-24.7401	-27.7472		-27.2672
2013-08-06 12:49:15	24.3	27.24		5.87172	-24.7706	-27.7676		-27.2876
2013-08-06 12:59:15	23.69	26.64		5.87866	-24.1488	-27.156		-26.676
2013-08-06 13:09:15	23.82	26.77		5.88561	-24.2813	-27.2885		-26.8085
2013-08-06 13:29:15	24.06	27.01		5.8995	-24.526	-27.5331		-27.0531
2013-08-06 13:39:15	24.2	27.13		5.90644	-24.6687	-27.6555	2013-08-06 13:39:15	-27.1755
2013-08-06 13:49:15	24.28	27.24		5.91339	-24.7503	-27.7676		-27.2876
2013-08-06 13:59:15	24.39	27.33		5.92033	-24.8624	-27.8593		-27.3793
2013-08-06 14:09:15	24.4	27.34		5.92727	-24.8726	-27.8695		-27.3895
2013-08-06 14:19:15	24.45	27.4		5.93422	-24.9235	-27.9307		-27.4507
2013-08-06 14:29:15	24.5	27.46		5.94116	-24.9745	-27.9918		-27.5118
2013-08-06 14:39:15	24.54	27.48		5.94811	-25.0153	-28.0122	2013-08-06 14:39:15	-27.5322
2013-08-06 14:49:15	24.57	27.53		5.95505	-25.0459	-28.0632		-27.5832
2013-08-06 14:59:15	24.62	27.57		5.962	-25.0968	-28.104		-27.624
2013-08-06 15:09:15	24.66	27.6		5.96894	-25.1376	-28.1346		-27.6546
2013-08-06 15:19:15	24.73	27.65		5.97589	-25.209	-28.1855		-27.7055
2013-08-06 15:29:15	24.76	27.7		5.98283	-25.2396	-28.2365		-27.7565
2013-08-06 15:39:15	24.84	27.78		5.98977	-25.3211	-28.318	2013-08-06 15:39:15	-27.838
2013-08-06 15:49:15	24.89	27.83		5.99672	-25.3721	-28.369		-27.889
2013-08-06 15:59:15	24.92	27.87		6.00366	-25.4027	-28.4098		-27.9298
2013-08-06 16:09:15	24.97	27.92		6.01061	-25.4536	-28.4608		-27.9808
2013-08-06 16:19:15	25.02	27.96		6.01755	-25.5046	-28.5015		-28.0215
2013-08-06 16:29:15	25.06	28.01		6.0245	-25.5454	-28.5525		-28.0725
2013-08-06 16:39:15	25.1	28.04		6.03144	-25.5861	-28.5831	2013-08-06 16:39:15	-28.1031
2013-08-06 16:49:15	25.12	28.07		6.03839	-25.6065	-28.6137		-28.1337
2013-08-06 16:59:15	25.2	28.13		6.04533	-25.6881	-28.6748		-28.1948
2013-08-06 17:09:15	25.23	28.18		6.05227	-25.7187	-28.7258		-28.2458
2013-08-06 17:19:15	25.29	28.23		6.05922	-25.7798	-28.7768		-28.2968
2013-08-06 17:29:15	25.31	28.26		6.06616	-25.8002	-28.8073		-28.3273
2013-08-06 17:39:15	25.35	28.29		6.07311	-25.841	-28.8379	2013-08-06 17:39:15	-28.3579
2013-08-06 17:49:15	25.41	28.35		6.08005	-25.9021	-28.8991		-28.4191
2013-08-06 17:59:15	25.43	28.37		6.087	-25.9225	-28.9195		-28.4395
2013-08-06 18:09:15	25.46	28.4		6.09394	-25.9531	-28.9501		-28.4701
2013-08-06 18:19:15	25.48	28.42		6.10089	-25.9735	-28.9704		-28.4904
2013-08-06 18:29:15	25.53	28.48		6.10783	-26.0245	-29.0316		-28.5516
2013-08-06 18:39:15	25.58	28.5		6.11477	-26.0754	-29.052	2013-08-06 18:39:15	-28.572
2013-08-06 18:49:15	25.58	28.52		6.12172	-26.0754	-29.0724		-28.5924
2013-08-06 18:59:15	25.62	28.56		6.12866	-26.1162	-29.1131		-28.6331
2013-08-06 19:09:15	25.66	28.6		6.13561	-26.157	-29.1539		-28.6739
2013-08-06 19:19:15	25.7	28.63		6.14255	-26.1978	-29.1845		-28.7045
2013-08-06 19:29:15	25.73	28.67		6.1495	-26.2283	-29.2253		-28.7453
2013-08-06 19:39:15	25.75	28.67		6.15644	-26.2487	-29.2253	2013-08-06 19:39:15	-28.7453
2013-08-06 19:49:15	25.79	28.72		6.16339	-26.2895	-29.2762		-28.7962
2013-08-06 19:59:15	25.79	28.72		6.17033	-26.2895	-29.2762		-28.7962
2013-08-06 20:09:15	25.83	28.77		6.17727	-26.3303	-29.3272		-28.8472
2013-08-06 20:19:15	25.86	28.81		6.18422	-26.3609	-29.368		-28.888
2013-08-06 20:29:15	25.76	28.72		6.19116	-26.2589	-29.2762		-28.7962
2013-08-06 20:39:15	25.87	28.8		6.19811	-26.371	-29.3578	2013-08-06 20:39:15	-28.8778
2013-08-06 20:49:15	25.92	28.85		6.20505	-26.422	-29.4088		-28.9288
2013-08-06 20:59:15	25.96	28.9		6.212	-26.4628	-29.4597		-28.9797
2013-08-06 21:09:15	25.93	28.88		6.21894	-26.4322	-29.4393		-28.9593
2013-08-06 21:19:15	25.96	28.9		6.22589	-26.4628	-29.4597		-28.9797
2013-08-06 21:29:15	26.02	28.97		6.23283	-26.524	-29.5311		-29.0511
2013-08-06 21:39:15	26.03	28.97		6.23977	-26.5341	-29.5311	2013-08-06 21:39:15	-29.0511
2013-08-06 21:49:15	26.04	28.98		6.24672	-26.5443	-29.5413		-29.0613
2013-08-06 21:59:15	26.04	28.99		6.25366	-26.5443	-29.5515		-29.0715
2013-08-06 22:09:15	26.07	29		6.26061	-26.5749	-29.5617		-29.0817
2013-08-06 22:19:15	26.08	29.03		6.26755	-26.5851	-29.5923		-29.1123
2013-08-06 22:29:15	26.09	29.04		6.2745	-26.5953	-29.6024		-29.1224
2013-08-06 22:39:15	26.15	29.08		6.28144	-26.6565	-29.6432	2013-08-06 22:39:15	-29.1632
2013-08-06 22:49:15	26.14	29.09		6.28839	-26.6463	-29.6534		-29.1734
2013-08-06 22:59:15	26.14	29.09		6.29533	-26.6463	-29.6534		-29.1734
2013-08-06 23:09:15	26.16	29.11		6.30227	-26.6667	-29.6738		-29.1938
2013-08-06 23:19:15	26.17	29.11		6.30922	-26.6769	-29.6738		-29.1938
2013-08-06 23:29:15	26.21	29.16		6.31616	-26.7176	-29.7248		-29.2448
2013-08-06 23:39:15	26.21	29.16		6.32311	-26.7176	-29.7248	2013-08-06 23:39:15	-29.2448
2013-08-06 23:49:15	26.24	29.18		6.33005	-26.7482	-29.7452		-29.2652
2013-08-06 23:59:15	26.24	29.18		6.337	-26.7482	-29.7452		-29.2652
2013-08-07 00:09:15	26.22	29.16		6.34394	-26.7278	-29.7248		-29.2448
2013-08-07 00:19:15	26.26	29.21		6.35089	-26.7686	-29.7757		-29.2957
2013-08-07 00:29:15	26.3	29.24		6.35783	-26.8094	-29.8063		-29.3263
2013-08-07 00:39:15	26.29	29.23		6.36477	-26.7992	-29.7961	2013-08-07 00:39:15	-29.3161
2013-08-07 00:49:15	26.33	29.28		6.37172	-26.84	-29.8471		-29.3671
2013-08-07 00:59:15	26.33	29.28		6.37866	-26.84	-29.8471		-29.3671
2013-08-07 01:09:15	26.33	29.28		6.38561	-26.84	-29.8471		-29.3671
2013-08-07 01:19:15	26.35	29.3		6.39255	-26.8603	-29.8675		-29.3875
2013-08-07 01:29:15	26.37	29.32		6.3995	-26.8807	-29.8879		-29.4079
2013-08-07 01:39:15	26.38	29.32		6.40644	-26.8909	-29.8879	2013-08-07 01:39:15	-29.4079
2013-08-07 01:49:15	26.36	29.32		6.41339	-26.8705	-29.8879		-29.4079
2013-08-07 01:59:15	26.4	29.34		6.42033	-26.9113	-29.9083		-29.4283
2013-08-07 02:09:15	26.41	29.37		6.42727	-26.9215	-29.9388		-29.4588
2013-08-07 02:19:15	26.44	29.4		6.43422	-26.9521	-29.9694		-29.4894
2013-08-07 02:29:15	26.45	29.4		6.44116	-26.9623	-29.9694		-29.4894
2013-08-07 02:39:15	26.49	29.43		6.44811	-27.0031	-30	2013-08-07 02:39:15	-29.52
2013-08-07 02:49:15	26.51	29.43		6.45505	-27.0234	-30		-29.52
2013-08-07 02:59:15	26.53	29.48		6.462	-27.0438	-30.051		-29.571
2013-08-07 03:09:15	26.52	29.49		6.46894	-27.0336	-30.0612		-29.5812
2013-08-07 03:19:15	26.58	29.53		6.47589	-27.0948	-30.1019		-29.6219
2013-08-07 03:29:15	26.57	29.52		6.48283	-27.0846	-30.0917		-29.6117
2013-08-07 03:39:15	26.59	29.55		6.48977	-27.105	-30.1223	2013-08-07 03:39:15	-29.6423
2013-08-07 03:49:15	26.61	29.56		6.49672	-27.1254	-30.1325		-29.6525
2013-08-07 03:59:15	26.63	29.59		6.50366	-27.1458	-30.1631		-29.6831
2013-08-07 04:09:15	26.65	29.6		6.51061	-27.1662	-30.1733		-29.6933
2013-08-07 04:19:15	26.67	29.62		6.51755	-27.1865	-30.1937		-29.7137
2013-08-07 04:29:15	26.68	29.62		6.5245	-27.1967	-30.1937		-29.7137
2013-08-07 04:39:15	26.7	29.65		6.53144	-27.2171	-30.2243	2013-08-07 04:39:15	-29.7443
2013-08-07 04:49:15	26.7	29.65		6.53839	-27.2171	-30.2243		-29.7443
2013-08-07 04:59:15	26.74	29.69		6.54533	-27.2579	-30.265		-29.785
2013-08-07 05:09:15	26.73	29.68		6.55227	-27.2477	-30.2548		-29.7748
2013-08-07 05:19:15	26.75	29.7		6.55922	-27.2681	-30.2752		-29.7952
2013-08-07 05:29:15	26.81	29.76		6.56616	-27.3293	-30.3364		-29.8564
2013-08-07 05:39:15	26.82	29.77		6.57311	-27.3394	-30.3466	2013-08-07 05:39:15	-29.8666
2013-08-07 05:49:15	26.83	29.77		6.58005	-27.3496	-30.3466		-29.8666
2013-08-07 05:59:15	26.86	29.8		6.587	-27.3802	-30.3772		-29.8972
2013-08-07 06:09:15	26.87	29.82		6.59394	-27.3904	-30.3976		-29.9176
2013-08-07 06:19:15	26.87	29.82		6.60089	-27.3904	-30.3976		-29.9176
2013-08-07 06:29:15	26.92	29.87		6.60783	-27.4414	-30.4485		-29.9685
2013-08-07 06:39:15	26.86	29.81		6.61477	-27.3802	-30.3874	2013-08-07 06:39:15	-29.9074
2013-08-07 06:49:15	26.94	29.9		6.62172	-27.4618	-30.4791		-29.9991
2013-08-07 06:59:15	26.95	29.9		6.62866	-27.472	-30.4791		-29.9991
2013-08-07 07:09:15	26.96	29.92		6.63561	-27.4822	-30.4995		-30.0195
2013-08-07 07:19:15	27.03	29.97		6.64255	-27.5535	-30.5505		-30.0705
2013-08-07 07:29:15	27.02	29.97		6.6495	-27.5433	-30.5505		-30.0705
2013-08-07 07:39:15	27.04	30		6.65644	-27.5637	-30.581	2013-08-07 07:39:15	-30.101
2013-08-07 07:49:15	27.09	30.03		6.66339	-27.6147	-30.6116		-30.1316
2013-08-07 07:59:15	27.09	30.03		6.67033	-27.6147	-30.6116		-30.1316
2013-08-07 08:09:15	27.09	30.05		6.67727	-27.6147	-30.632		-30.152
2013-08-07 08:19:15	27.06	29.99		6.68422	-27.5841	-30.5708		-30.0908
2013-08-07 08:29:15	27.09	30.05		6.69116	-27.6147	-30.632		-30.152
2013-08-07 08:39:15	27.14	30.07		6.69811	-27.6656	-30.6524	2013-08-07 08:39:15	-30.1724
2013-08-07 08:49:15	27.13	30.09		6.70505	-27.6555	-30.6728		-30.1928
2013-08-07 08:59:15	27.18	30.13		6.712	-27.7064	-30.7136		-30.2336
2013-08-07 09:09:15	27.16	30.1		6.71894	-27.686	-30.683		-30.203
2013-08-07 09:19:15	27.19	30.14		6.72589	-27.7166	-30.7238		-30.2438
2013-08-07 09:29:15	27.23	30.18		6.73283	-27.7574	-30.7645		-30.2845
2013-08-07 09:39:15	27.25	30.2		6.73977	-27.7778	-30.7849	2013-08-07 09:39:15	-30.3049
2013-08-07 09:49:15	27.3	30.25		6.74672	-27.8287	-30.8359		-30.3559
2013-08-07 09:59:15	27.32	30.27		6.75366	-27.8491	-30.8563		-30.3763
2013-08-07 10:09:15	27.33	30.29		6.76061	-27.8593	-30.8767		-30.3967
2013-08-07 10:19:15	27.36	30.31		6.76755	-27.8899	-30.897		-30.417
2013-08-07 10:29:15	27.37	30.31		6.7745	-27.9001	-30.897		-30.417
2013-08-07 10:39:15	27.41	30.37		6.78144	-27.9409	-30.9582	2013-08-07 10:39:15	-30.4782
2013-08-07 10:49:15	27.4	30.35		6.78839	-27.9307	-30.9378		-30.4578
2013-08-07 10:59:15	27.44	30.4		6.79533	-27.9715	-30.9888		-30.5088
2013-08-07 11:09:15	27.45	30.41		6.80227	-27.9817	-30.999		-30.519
2013-08-07 11:19:15	27.49	30.44		6.80922	-28.0224	-31.0296		-30.5496
2013-08-07 11:29:15	27.54	30.47		6.81616	-28.0734	-31.0601		-30.5801
2013-08-07 11:39:15	27.53	30.48		6.82311	-28.0632	-31.0703	2013-08-07 11:39:15	-30.5903
2013-08-07 11:49:15	27.56	30.51		6.83005	-28.0938	-31.1009		-30.6209
2013-08-07 11:59:15	27.53	30.48		6.837	-28.0632	-31.0703		-30.5903
2013-08-07 12:09:15	27.58	30.53		6.84394	-28.1142	-31.1213		-30.6413
2013-08-07 12:19:15	27.58	30.53		6.85089	-28.1142	-31.1213		-30.6413
2013-08-07 12:29:15	27.59	30.54		6.85783	-28.1244	-31.1315		-30.6515
2013-08-07 12:39:15	27.64	30.59		6.86477	-28.1753	-31.1825	2013-08-07 12:39:15	-30.7025
2013-08-07 12:49:15	27.67	30.6		6.87172	-28.2059	-31.1927		-30.7127
2013-08-07 12:59:15	27.69	30.64		6.87866	-28.2263	-31.2334		-30.7534
2013-08-07 13:09:15	27.72	30.65		6.88561	-28.2569	-31.2436		-30.7636
2013-08-07 13:19:15	27.63	30.6		6.89255	-28.1651	-31.1927		-30.7127
2013-08-07 13:29:15	27.69	30.65		6.8995	-28.2263	-31.2436		-30.7636
2013-08-07 13:39:15	27.71	30.68		6.90644	-28.2467	-31.2742	2013-08-07 13:39:15	-30.7942
2013-08-07 13:49:15	27.74	30.7		6.91339	-28.2773	-31.2946		-30.8146
2013-08-07 13:59:15	27.81	30.77		6.92033	-28.3486	-31.366		-30.886
2013-08-07 14:09:15	27.79	30.76		6.92727	-28.3282	-31.3558		-30.8758
2013-08-07 14:19:15	27.86	30.8		6.93422	-28.3996	-31.3965		-30.9165
2013-08-07 14:29:15	27.84	30.81		6.94116	-28.3792	-31.4067		-30.9267
2013-08-07 14:39:15	27.88	30.84		6.94811	-28.42	-31.4373	2013-08-07 14:39:15	-30.9573
2013-08-07 14:49:15	27.89	30.85		6.95505	-28.4302	-31.4475		-30.9675
2013-08-07 14:59:15	27.95	30.92		6.962	-28.4913	-31.5189		-31.0389
2013-08-07 15:09:15	27.93	30.9		6.96894	-28.4709	-31.4985		-31.0185
2013-08-07 15:29:15	27.94	30.92		6.98283	-28.4811	-31.5189		-31.0389
2013-08-07 15:39:15	28	30.97		6.98977	-28.5423	-31.5698		-31.0898
2013-08-07 15:49:15	27.99	30.96		6.99672	-28.5321	-31.5596	2013-08-07 15:49:15	-31.0796
2013-08-07 15:59:15	27.99	31.01		7.00366	-28.5321	-31.6106		-31.1306
2013-08-07 16:09:15	28.06	31.02		7.01061	-28.6035	-31.6208		-31.1408
2013-08-07 16:19:15	28.11	31.08		7.01755	-28.6544	-31.682		-31.202
2013-08-07 16:29:15	28.08	31.04		7.0245	-28.6239	-31.6412		-31.1612
2013-08-07 16:39:15	28.11	31.08		7.03144	-28.6544	-31.682		-31.202
2013-08-07 16:49:15	28.13	31.1		7.03839	-28.6748	-31.7023	2013-08-07 16:49:15	-31.2223
2013-08-07 16:59:15	28.16	31.13		7.04533	-28.7054	-31.7329		-31.2529
2013-08-07 17:09:15	28.17	31.14		7.05227	-28.7156	-31.7431		-31.2631
2013-08-07 17:19:15	28.19	31.15		7.05922	-28.736	-31.7533		-31.2733
2013-08-07 17:29:15	28.23	31.19		7.06616	-28.7768	-31.7941		-31.3141
2013-08-07 17:39:15	28.23	31.19		7.07311	-28.7768	-31.7941		-31.3141
2013-08-07 17:49:15	28.26	31.22		7.08005	-28.8073	-31.8247	2013-08-07 17:49:15	-31.3447
2013-08-07 17:59:15	28.25	31.22		7.087	-28.7971	-31.8247		-31.3447
2013-08-07 18:09:15	28.31	31.27		7.09394	-28.8583	-31.8756		-31.3956
2013-08-07 18:19:15	28.29	31.26		7.10089	-28.8379	-31.8654		-31.3854
2013-08-07 18:29:15	28.32	31.28		7.10783	-28.8685	-31.8858		-31.4058
2013-08-07 18:39:15	28.34	31.29		7.11477	-28.8889	-31.896		-31.416
2013-08-07 18:49:15	28.34	31.3		7.12172	-28.8889	-31.9062	2013-08-07 18:49:15	-31.4262
2013-08-07 18:59:15	28.4	31.36		7.12866	-28.9501	-31.9674		-31.4874
2013-08-07 19:09:15	28.42	31.37		7.13561	-28.9704	-31.9776		-31.4976
2013-08-07 19:19:15	28.44	31.41		7.14255	-28.9908	-32.0183		-31.5383
2013-08-07 19:29:15	28.48	31.45		7.1495	-29.0316	-32.0591		-31.5791
2013-08-07 19:39:15	28.26	31.32		7.15644	-28.8073	-31.9266		-31.4466
2013-08-07 19:49:15	28.5	31.47		7.16339	-29.052	-32.0795	2013-08-07 19:49:15	-31.5995
2013-08-07 19:59:15	28.53	31.47		7.17033	-29.0826	-32.0795		-31.5995
2013-08-07 20:09:15	28.54	31.48		7.17727	-29.0928	-32.0897		-31.6097
2013-08-07 20:19:15	28.56	31.5		7.18422	-29.1131	-32.1101		-31.6301
2013-08-07 20:29:15	28.52	31.47		7.19116	-29.0724	-32.0795		-31.5995
2013-08-07 20:39:15	28.56	31.52		7.19811	-29.1131	-32.1305		-31.6505
2013-08-07 20:49:15	28.57	31.52		7.20505	-29.1233	-32.1305	2013-08-07 20:49:15	-31.6505
2013-08-07 20:59:15	28.58	31.53		7.212	-29.1335	-32.1407		-31.6607
2013-08-07 21:09:15	28.6	31.54		7.21894	-29.1539	-32.1509		-31.6709
2013-08-07 21:19:15	28.61	31.56		7.22589	-29.1641	-32.1713		-31.6913
2013-08-07 21:29:15	28.65	31.61		7.23283	-29.2049	-32.2222		-31.7422
2013-08-07 21:39:15	28.64	31.59		7.23977	-29.1947	-32.2018		-31.7218
2013-08-07 21:49:15	28.67	31.62		7.24672	-29.2253	-32.2324	2013-08-07 21:49:15	-31.7524
2013-08-07 21:59:15	28.72	31.66		7.25366	-29.2762	-32.2732		-31.7932
2013-08-07 22:09:15	28.73	31.67		7.26061	-29.2864	-32.2834		-31.8034
2013-08-07 22:19:15	28.74	31.7		7.26755	-29.2966	-32.314		-31.834
2013-08-07 22:29:15	28.77	31.71		7.2745	-29.3272	-32.3242		-31.8442
2013-08-07 22:39:15	28.78	31.74		7.28144	-29.3374	-32.3547		-31.8747
2013-08-07 22:49:15	28.8	31.77		7.28839	-29.3578	-32.3853	2013-08-07 22:49:15	-31.9053
2013-08-07 22:59:15	28.8	31.76		7.29533	-29.3578	-32.3751		-31.8951
2013-08-07 23:09:15	28.82	31.77		7.30227	-29.3782	-32.3853		-31.9053
2013-08-07 23:19:15	28.86	31.82		7.30922	-29.419	-32.4363		-31.9563
2013-08-07 23:29:15	28.87	31.83		7.31616	-29.4292	-32.4465		-31.9665
2013-08-07 23:39:15	28.88	31.84		7.32311	-29.4393	-32.4567		-31.9767
2013-08-07 23:49:15	28.93	31.88		7.33005	-29.4903	-32.4975	2013-08-07 23:49:15	-32.0175
2013-08-07 23:59:15	28.9	31.86		7.337	-29.4597	-32.4771		-31.9971
2013-08-08 00:09:15	28.93	31.88		7.34394	-29.4903	-32.4975		-32.0175
2013-08-08 00:19:15	28.98	31.94		7.35089	-29.5413	-32.5586		-32.0786
2013-08-08 00:29:15	28.98	31.94		7.35783	-29.5413	-32.5586		-32.0786
2013-08-08 00:39:15	29	31.96		7.36477	-29.5617	-32.579		-32.099
2013-08-08 00:49:15	29.04	31.99		7.37172	-29.6024	-32.6096	2013-08-08 00:49:15	-32.1296
2013-08-08 00:59:15	28.97	31.96		7.37866	-29.5311	-32.579		-32.099
2013-08-08 01:09:15	29.06	32.02		7.38561	-29.6228	-32.6402		-32.1602
2013-08-08 01:19:15	29.07	32.03		7.39255	-29.633	-32.6504		-32.1704
2013-08-08 01:29:15	29.08	32.03		7.3995	-29.6432	-32.6504		-32.1704
2013-08-08 01:39:15	29.12	32.09		7.40644	-29.684	-32.7115		-32.2315
2013-08-08 01:49:15	29.12	32.08		7.41339	-29.684	-32.7013	2013-08-08 01:49:15	-32.2213
2013-08-08 01:59:15	29.15	32.1		7.42033	-29.7146	-32.7217		-32.2417
2013-08-08 02:09:15	29.21	32.17		7.42727	-29.7757	-32.7931		-32.3131
2013-08-08 02:19:15	29.2	32.16		7.43422	-29.7655	-32.7829		-32.3029
2013-08-08 02:29:15	29.2	32.16		7.44116	-29.7655	-32.7829		-32.3029
2013-08-08 02:39:15	29.23	32.2		7.44811	-29.7961	-32.8236		-32.3436
2013-08-08 02:49:15	29.25	32.21		7.45505	-29.8165	-32.8338	2013-08-08 02:49:15	-32.3538
2013-08-08 02:59:15	29.25	32.2		7.462	-29.8165	-32.8236		-32.3436
2013-08-08 03:09:15	29.29	32.24		7.46894	-29.8573	-32.8644		-32.3844
2013-08-08 03:19:15	29.31	32.25		7.47589	-29.8777	-32.8746		-32.3946
2013-08-08 03:29:15	29.32	32.28		7.48283	-29.8879	-32.9052		-32.4252
2013-08-08 03:39:15	29.35	32.28		7.48977	-29.9185	-32.9052		-32.4252
2013-08-08 03:49:15	29.31	32.27		7.49672	-29.8777	-32.895	2013-08-08 03:49:15	-32.415
2013-08-08 03:59:15	29.32	32.26		7.50366	-29.8879	-32.8848		-32.4048
2013-08-08 04:09:15	29.34	32.29		7.51061	-29.9083	-32.9154		-32.4354
2013-08-08 04:19:15	29.36	32.32		7.51755	-29.9286	-32.946		-32.466
2013-08-08 04:29:15	29.37	32.34		7.5245	-29.9388	-32.9664		-32.4864
2013-08-08 04:39:15	29.43	32.39		7.53144	-30	-33.0173		-32.5373
2013-08-08 04:49:15	29.44	32.39		7.53839	-30.0102	-33.0173	2013-08-08 04:49:15	-32.5373
2013-08-08 04:59:15	29.45	32.4		7.54533	-30.0204	-33.0275		-32.5475
2013-08-08 05:09:15	29.47	32.43		7.55227	-30.0408	-33.0581		-32.5781
2013-08-08 05:19:15	29.48	32.45		7.55922	-30.051	-33.0785		-32.5985
2013-08-08 05:29:15	29.51	32.47		7.56616	-30.0815	-33.0989		-32.6189
2013-08-08 05:39:15	29.52	32.48		7.57311	-30.0917	-33.1091		-32.6291
2013-08-08 05:49:15	29.56	32.52		7.58005	-30.1325	-33.1498	2013-08-08 05:49:15	-32.6698
2013-08-08 05:59:15	29.57	32.52		7.587	-30.1427	-33.1498		-32.6698
2013-08-08 06:09:15	29.58	32.54		7.59394	-30.1529	-33.1702		-32.6902
2013-08-08 06:19:15	29.63	32.58		7.60089	-30.2039	-33.211		-32.731
2013-08-08 06:29:15	29.64	32.59		7.60783	-30.2141	-33.2212		-32.7412
2013-08-08 06:39:15	29.64	32.58		7.61477	-30.2141	-33.211		-32.731
2013-08-08 06:49:15	29.68	32.64		7.62172	-30.2548	-33.2722	2013-08-08 06:49:15	-32.7922
2013-08-08 06:59:15	29.69	32.64		7.62866	-30.265	-33.2722		-32.7922
2013-08-08 07:09:15	29.71	32.66		7.63561	-30.2854	-33.2926		-32.8126
2013-08-08 07:19:15	29.71	32.67		7.64255	-30.2854	-33.3028		-32.8228
2013-08-08 07:29:15	29.75	32.7		7.6495	-30.3262	-33.3333		-32.8533
2013-08-08 07:39:15	29.76	32.71		7.65644	-30.3364	-33.3435		-32.8635
2013-08-08 07:49:15	29.78	32.73		7.66339	-30.3568	-33.3639	2013-08-08 07:49:15	-32.8839
2013-08-08 07:59:15	29.8	32.78		7.67033	-30.3772	-33.4149		-32.9349
2013-08-08 08:09:15	29.83	32.77		7.67727	-30.4077	-33.4047		-32.9247
2013-08-08 08:19:15	29.82	32.77		7.68422	-30.3976	-33.4047		-32.9247
2013-08-08 08:29:15	29.45	32.43		7.69116	-30.0204	-33.0581		-32.5781
2013-08-08 08:39:15	29.64	32.61		7.69811	-30.2141	-33.2416		-32.7616
2013-08-08 08:49:15	29.72	32.68		7.70505	-30.2956	-33.3129	2013-08-08 08:49:15	-32.8329
2013-08-08 08:59:15	29.82	32.79		7.712	-30.3976	-33.4251		-32.9451
2013-08-08 09:09:15	29.85	32.8		7.71894	-30.4281	-33.4353		-32.9553
2013-08-08 09:19:15	29.85	32.81		7.72589	-30.4281	-33.4455		-32.9655
2013-08-08 09:29:15	29.89	32.85		7.73283	-30.4689	-33.4862		-33.0062
2013-08-08 09:39:15	29.92	32.88		7.73977	-30.4995	-33.5168		-33.0368
2013-08-08 09:49:15	29.94	32.91		7.74672	-30.5199	-33.5474	2013-08-08 09:49:15	-33.0674
2013-08-08 09:59:15	29.99	32.95		7.75366	-30.5708	-33.5882		-33.1082
2013-08-08 10:09:15	30.02	32.98		7.76061	-30.6014	-33.6188		-33.1388
2013-08-08 10:19:15	30.04	33.01		7.76755	-30.6218	-33.6493		-33.1693
2013-08-08 10:29:15	30.07	33.02		7.7745	-30.6524	-33.6595		-33.1795
2013-08-08 10:39:15	30.1	33.07		7.78144	-30.683	-33.7105		-33.2305
2013-08-08 10:49:15	30.07	33.04		7.78839	-30.6524	-33.6799	2013-08-08 10:49:15	-33.1999
2013-08-08 10:59:15	30.09	33.06		7.79533	-30.6728	-33.7003		-33.2203
2013-08-08 11:09:15	30.18	33.13		7.80227	-30.7645	-33.7717		-33.2917
2013-08-08 11:19:15	30.23	33.2		7.80922	-30.8155	-33.843		-33.363
2013-08-08 11:29:15	30.26	33.21		7.81616	-30.8461	-33.8532		-33.3732
2013-08-08 11:39:15	30.25	33.22		7.82311	-30.8359	-33.8634		-33.3834
2013-08-08 11:49:15	30.31	33.28		7.83005	-30.897	-33.9246	2013-08-08 11:49:15	-33.4446
2013-08-08 11:59:15	30.32	33.28		7.837	-30.9072	-33.9246		-33.4446
2013-08-08 12:09:15	30.38	33.33		7.84394	-30.9684	-33.9755		-33.4955
2013-08-08 12:19:15	30.38	33.35		7.85089	-30.9684	-33.9959		-33.5159
2013-08-08 12:29:15	30.44	33.4		7.85783	-31.0296	-34.0469		-33.5669
2013-08-08 12:39:15	30.45	33.41		7.86477	-31.0398	-34.0571		-33.5771
2013-08-08 12:49:15	30.48	33.46		7.87172	-31.0703	-34.1081	2013-08-08 12:49:15	-33.6281
2013-08-08 12:59:15	30.51	33.48		7.87866	-31.1009	-34.1284		-33.6484
2013-08-08 13:09:15	30.53	33.49		7.88561	-31.1213	-34.1386		-33.6586
2013-08-08 13:19:15	30.57	33.54		7.89255	-31.1621	-34.1896		-33.7096
2013-08-08 13:29:15	30.57	33.55		7.8995	-31.1621	-34.1998		-33.7198
2013-08-08 13:39:15	30.6	33.57		7.90644	-31.1927	-34.2202		-33.7402
2013-08-08 13:49:15	30.65	33.61		7.91339	-31.2436	-34.261	2013-08-08 13:49:15	-33.781
2013-08-08 13:59:15	30.65	33.61		7.92033	-31.2436	-34.261		-33.781
2013-08-08 14:09:15	30.67	33.64		7.92727	-31.264	-34.2915		-33.8115
2013-08-08 14:19:15	30.73	33.68		7.93422	-31.3252	-34.3323		-33.8523
2013-08-08 14:29:15	30.74	33.72		7.94116	-31.3354	-34.3731		-33.8931
2013-08-08 14:39:15	30.77	33.73		7.94811	-31.366	-34.3833		-33.9033
2013-08-08 14:49:15	30.81	33.76		7.95505	-31.4067	-34.4139	2013-08-08 14:49:15	-33.9339
2013-08-08 14:59:15	30.86	33.83		7.962	-31.4577	-34.4852		-34.0052
2013-08-08 15:09:15	30.89	33.84		7.96894	-31.4883	-34.4954		-34.0154
2013-08-08 15:19:15	30.88	33.83		7.97589	-31.4781	-34.4852		-34.0052
2013-08-08 15:29:15	30.9	33.88		7.98283	-31.4985	-34.5362		-34.0562
2013-08-08 15:39:15	30.96	33.91		7.98977	-31.5596	-34.5668		-34.0868
2013-08-08 15:49:15	30.97	33.93		7.99672	-31.5698	-34.5872	2013-08-08 15:49:15	-34.1072
2013-08-08 15:59:15	31.01	33.96		8.00366	-31.6106	-34.6177		-34.1377
2013-08-08 16:09:15	31.04	34.02		8.01061	-31.6412	-34.6789		-34.1989
2013-08-08 16:19:15	31.06	34.03		8.01755	-31.6616	-34.6891		-34.2091
2013-08-08 16:29:15	31.07	34.04		8.0245	-31.6718	-34.6993		-34.2193
2013-08-08 16:39:15	31.08	34.03		8.03144	-31.682	-34.6891		-34.2091
2013-08-08 16:49:15	31.11	34.08		8.03839	-31.7125	-34.7401	2013-08-08 16:49:15	-34.2601
2013-08-08 16:59:15	31.15	34.12		8.04533	-31.7533	-34.7808		-34.3008
2013-08-08 17:09:15	31.19	34.15		8.05227	-31.7941	-34.8114		-34.3314
2013-08-08 17:19:15	31.18	34.26		8.05922	-31.7839	-34.9235		-34.4435
2013-08-08 17:29:15	31.23	34.18		8.06616	-31.8349	-34.842		-34.362
2013-08-08 17:39:15	31.23	34.21		8.07311	-31.8349	-34.8726		-34.3926
2013-08-08 17:49:15	31.26	34.24		8.08005	-31.8654	-34.9032	2013-08-08 17:49:15	-34.4232
2013-08-08 17:59:15	31.33	34.3		8.087	-31.9368	-34.9643		-34.4843
2013-08-08 18:09:15	31.35	34.32		8.09394	-31.9572	-34.9847		-34.5047
2013-08-08 18:19:15	31.37	34.33		8.10089	-31.9776	-34.9949		-34.5149
2013-08-08 18:29:15	31.42	34.39		8.10783	-32.0285	-35.0561		-34.5761
2013-08-08 18:39:15	31.45	34.41		8.11477	-32.0591	-35.0765		-34.5965
2013-08-08 18:49:15	31.49	34.46		8.12172	-32.0999	-35.1274	2013-08-08 18:49:15	-34.6474
2013-08-08 18:59:15	31.51	34.47		8.12866	-32.1203	-35.1376		-34.6576
2013-08-08 19:09:15	31.51	34.5		8.13561	-32.1203	-35.1682		-34.6882
2013-08-08 19:19:15	31.56	34.55		8.14255	-32.1713	-35.2192		-34.7392
2013-08-08 19:29:15	31.6	34.56		8.1495	-32.212	-35.2294		-34.7494
2013-08-08 19:39:15	31.61	34.58		8.15644	-32.2222	-35.2497		-34.7697
2013-08-08 19:49:15	31.69	34.67		8.16339	-32.3038	-35.3415	2013-08-08 19:49:15	-34.8615
2013-08-08 19:59:15	31.27	34.25		8.17033	-31.8756	-34.9134		-34.4334
2013-08-08 20:09:15	31.39	34.36		8.17727	-31.998	-35.0255		-34.5455
2013-08-08 20:19:15	31.51	34.48		8.18422	-32.1203	-35.1478		-34.6678
2013-08-08 20:29:15	31.65	34.62		8.19116	-32.263	-35.2905		-34.8105
2013-08-08 20:39:15	31.68	34.65		8.19811	-32.2936	-35.3211		-34.8411
2013-08-08 20:49:15	31.72	34.69		8.20505	-32.3344	-35.3619	2013-08-08 20:49:15	-34.8819
2013-08-08 20:59:15	31.78	34.75		8.212	-32.3955	-35.423		-34.943
2013-08-08 21:09:15	31.83	34.8		8.21894	-32.4465	-35.474		-34.994
2013-08-08 21:19:15	31.85	34.81		8.22589	-32.4669	-35.4842		-35.0042
2013-08-08 21:29:15	31.9	34.87		8.23283	-32.5178	-35.5454		-35.0654
2013-08-08 21:39:15	31.94	34.9		8.23977	-32.5586	-35.5759		-35.0959
2013-08-08 21:49:15	32.01	35.01		8.24672	-32.63	-35.6881	2013-08-08 21:49:15	-35.2081
2013-08-08 21:59:15	32.03	35		8.25366	-32.6504	-35.6779		-35.1979
2013-08-08 22:09:15	32.07	35.02		8.26061	-32.6911	-35.6983		-35.2183
2013-08-08 22:19:15	32.08	35.06		8.26755	-32.7013	-35.739		-35.259
2013-08-08 22:29:15	32.1	35.09		8.2745	-32.7217	-35.7696		-35.2896
2013-08-08 22:39:15	32.18	35.13		8.28144	-32.8033	-35.8104		-35.3304
2013-08-08 22:49:15	32.21	35.16		8.28839	-32.8338	-35.841	2013-08-08 22:49:15	-35.361
2013-08-08 22:59:15	32.22	35.19		8.29533	-32.844	-35.8716		-35.3916
2013-08-08 23:09:15	32.26	35.24		8.30227	-32.8848	-35.9225		-35.4425
2013-08-08 23:19:15	32.28	35.25		8.30922	-32.9052	-35.9327		-35.4527
2013-08-08 23:29:15	32.33	35.31		8.31616	-32.9562	-35.9939		-35.5139
2013-08-08 23:39:15	32.36	35.33		8.32311	-32.9867	-36.0143		-35.5343
2013-08-08 23:49:15	32.38	35.35		8.33005	-33.0071	-36.0347	2013-08-08 23:49:15	-35.5547
2013-08-08 23:59:15	32.41	35.38		8.337	-33.0377	-36.0652		-35.5852
2013-08-09 00:09:15	32.44	35.39		8.34394	-33.0683	-36.0754		-35.5954
2013-08-09 00:19:15	32.46	35.43		8.35089	-33.0887	-36.1162		-35.6362
2013-08-09 00:29:15	32.48	35.45		8.35783	-33.1091	-36.1366		-35.6566
2013-08-09 00:39:15	32.55	35.5		8.36477	-33.1804	-36.1876		-35.7076
2013-08-09 00:49:15	32.58	35.56		8.37172	-33.211	-36.2487	2013-08-09 00:49:15	-35.7687
2013-08-09 00:59:15	32.64	35.59		8.37866	-33.2722	-36.2793		-35.7993
2013-08-09 01:09:15	32.66	35.62		8.38561	-33.2926	-36.3099		-35.8299
2013-08-09 01:19:15	32.66	35.63		8.39255	-33.2926	-36.3201		-35.8401
2013-08-09 01:29:15	32.7	35.67		8.3995	-33.3333	-36.3609		-35.8809
2013-08-09 01:39:15	32.76	35.73		8.40644	-33.3945	-36.422		-35.942
2013-08-09 01:49:15	32.78	35.74		8.41339	-33.4149	-36.4322	2013-08-09 01:49:15	-35.9522
2013-08-09 01:59:15	32.8	35.76		8.42033	-33.4353	-36.4526		-35.9726
2013-08-09 02:09:15	32.83	35.81		8.42727	-33.4659	-36.5036		-36.0236
2013-08-09 02:19:15	32.88	35.85		8.43422	-33.5168	-36.5443		-36.0643
2013-08-09 02:29:15	32.9	35.86		8.44116	-33.5372	-36.5545		-36.0745
2013-08-09 02:39:15	32.94	35.91		8.44811	-33.578	-36.6055		-36.1255
2013-08-09 02:49:15	32.96	35.94		8.45505	-33.5984	-36.6361	2013-08-09 02:49:15	-36.1561
2013-08-09 02:59:15	33.01	35.98		8.462	-33.6493	-36.6769		-36.1969
2013-08-09 03:09:15	33.06	36.02		8.46894	-33.7003	-36.7176		-36.2376
2013-08-09 03:19:15	33.08	36.05		8.47589	-33.7207	-36.7482		-36.2682
2013-08-09 03:29:15	33.1	36.07		8.48283	-33.7411	-36.7686		-36.2886
2013-08-09 03:39:15	33.13	36.11		8.48977	-33.7717	-36.8094		-36.3294
2013-08-09 03:49:15	33.16	36.14		8.49672	-33.8022	-36.84	2013-08-09 03:49:15	-36.36
2013-08-09 03:59:15	33.21	36.18		8.50366	-33.8532	-36.8807		-36.4007
2013-08-09 04:09:15	33.23	35.97		8.51061	-33.8736	-36.6667		-36.1867
2013-08-09 04:19:15	33.28	36.24		8.51755	-33.9246	-36.9419		-36.4619
2013-08-09 04:29:15	33.31	36.29		8.5245	-33.9551	-36.9929		-36.5129
2013-08-09 04:39:15	33.35	36.31		8.53144	-33.9959	-37.0133		-36.5333
2013-08-09 04:49:15	33.39	36.37		8.53839	-34.0367	-37.0744	2013-08-09 04:49:15	-36.5944
2013-08-09 04:59:15	33.43	36.39		8.54533	-34.0775	-37.0948		-36.6148
2013-08-09 05:09:15	33.48	36.45		8.55227	-34.1284	-37.156		-36.676
2013-08-09 05:19:15	33.5	36.47		8.55922	-34.1488	-37.1764		-36.6964
2013-08-09 05:29:15	33.55	36.52		8.56616	-34.1998	-37.2273		-36.7473
2013-08-09 05:39:15	33.58	36.55		8.57311	-34.2304	-37.2579		-36.7779
2013-08-09 05:49:15	33.64	36.6		8.58005	-34.2915	-37.3089	2013-08-09 05:49:15	-36.8289
2013-08-09 05:59:15	33.66	36.64		8.587	-34.3119	-37.3496		-36.8696
2013-08-09 06:19:15	33.75	36.72		8.60089	-34.4037	-37.4312		-36.9512
2013-08-09 06:29:15	33.79	36.76		8.60783	-34.4444	-37.472		-36.992
2013-08-09 06:39:15	33.78	36.74		8.61477	-34.4343	-37.4516		-36.9716
2013-08-09 06:49:15	33.83	36.81		8.62172	-34.4852	-37.5229		-37.0429
2013-08-09 06:59:15	33.88	36.85		8.62866	-34.5362	-37.5637	2013-08-09 06:59:15	-37.0837
2013-08-09 07:09:15	33.92	36.9		8.63561	-34.577	-37.6147		-37.1347
2013-08-09 07:19:15	33.93	36.9		8.64255	-34.5872	-37.6147		-37.1347
2013-08-09 07:29:15	33.94	36.89		8.6495	-34.5973	-37.6045		-37.1245
2013-08-09 07:39:15	33.97	36.94		8.65644	-34.6279	-37.6555		-37.1755
2013-08-09 07:49:15	33.98	36.96		8.66339	-34.6381	-37.6758		-37.1958
2013-08-09 07:59:15	34.01	36.99		8.67033	-34.6687	-37.7064	2013-08-09 07:59:15	-37.2264
2013-08-09 08:09:15	34.07	37.03		8.67727	-34.7299	-37.7472		-37.2672
2013-08-09 08:19:15	34.12	37.09		8.68422	-34.7808	-37.8084		-37.3284
2013-08-09 08:29:15	34.15	37.12		8.69116	-34.8114	-37.8389		-37.3589
2013-08-09 08:39:15	34.14	37.13		8.69811	-34.8012	-37.8491		-37.3691
2013-08-09 08:49:15	34.19	37.16		8.70505	-34.8522	-37.8797		-37.3997
2013-08-09 08:59:15	34.22	37.2		8.712	-34.8828	-37.9205	2013-08-09 08:59:15	-37.4405
2013-08-09 09:09:15	34.31	37.3		8.71894	-34.9745	-38.0224		-37.5424
2013-08-09 09:19:15	34.34	37.29		8.72589	-35.0051	-38.0122		-37.5322
2013-08-09 09:29:15	34.39	37.37		8.73283	-35.0561	-38.0938		-37.6138
2013-08-09 09:39:15	34.37	37.41		8.73977	-35.0357	-38.1346		-37.6546
2013-08-09 09:49:15	34.51	37.47		8.74672	-35.1784	-38.1957		-37.7157
2013-08-09 09:59:15	34.5	37.47		8.75366	-35.1682	-38.1957	2013-08-09 09:59:15	-37.7157
2013-08-09 10:09:15	34.53	37.5		8.76061	-35.1988	-38.2263		-37.7463
2013-08-09 10:19:15	34.62	37.56		8.76755	-35.2905	-38.2875		-37.8075
2013-08-09 10:29:15	34.63	37.55		8.7745	-35.3007	-38.2773		-37.7973
2013-08-09 10:39:15	34.7	37.67		8.78144	-35.3721	-38.3996		-37.9196
2013-08-09 10:49:15	34.72	37.68		8.78839	-35.3925	-38.4098		-37.9298
2013-08-09 10:59:15	34.79	37.76		8.79533	-35.4638	-38.4913	2013-08-09 10:59:15	-38.0113
2013-08-09 11:09:15	34.8	37.77		8.80227	-35.474	-38.5015		-38.0215
2013-08-09 11:19:15	34.79	37.79		8.80922	-35.4638	-38.5219		-38.0419
2013-08-09 11:29:15	34.85	37.82		8.81616	-35.525	-38.5525		-38.0725
2013-08-09 11:39:15	34.89	37.87		8.82311	-35.5657	-38.6035		-38.1235
2013-08-09 11:49:15	34.97	37.94		8.83005	-35.6473	-38.6748		-38.1948
2013-08-09 11:59:15	35	37.97		8.837	-35.6779	-38.7054	2013-08-09 11:59:15	-38.2254
2013-08-09 12:09:15	35.08	38.06		8.84394	-35.7594	-38.7971		-38.3171
2013-08-09 12:19:15	35.13	38.1		8.85089	-35.8104	-38.8379		-38.3579
2013-08-09 12:29:15	35.18	38.16		8.85783	-35.8614	-38.8991		-38.4191
2013-08-09 12:39:15	35.18	38.15		8.86477	-35.8614	-38.8889		-38.4089
2013-08-09 12:49:15	35.27	38.24		8.87172	-35.9531	-38.9806		-38.5006
2013-08-09 12:59:15	35.29	38.27		8.87866	-35.9735	-39.0112	2013-08-09 12:59:15	-38.5312
2013-08-09 13:09:15	35.32	38.3		8.88561	-36.0041	-39.0418		-38.5618
2013-08-09 13:19:15	35.2	38.3		8.89255	-35.8818	-39.0418		-38.5618
2013-08-09 13:29:15	35.36	38.32		8.8995	-36.0449	-39.0622		-38.5822
2013-08-09 13:39:15	35.45	38.43		8.90644	-36.1366	-39.1743		-38.6943
2013-08-09 13:49:15	35.48	38.45		8.91339	-36.1672	-39.1947		-38.7147
2013-08-09 13:59:15	35.54	38.51		8.92033	-36.2283	-39.2559	2013-08-09 13:59:15	-38.7759
2013-08-09 14:09:15	35.6	38.6		8.92727	-36.2895	-39.3476		-38.8676
2013-08-09 14:19:15	35.65	38.61		8.93422	-36.3405	-39.3578		-38.8778
2013-08-09 14:29:15	35.73	38.7		8.94116	-36.422	-39.4495		-38.9695
2013-08-09 14:39:15	35.8	38.76		8.94811	-36.4934	-39.5107		-39.0307
2013-08-09 14:49:15	35.82	38.79		8.95505	-36.5138	-39.5413		-39.0613
2013-08-09 14:59:15	35.89	38.85		8.962	-36.5851	-39.6024	2013-08-09 14:59:15	-39.1224
2013-08-09 15:09:15	35.96	38.93		8.96894	-36.6565	-39.684		-39.204
2013-08-09 15:19:15	35.98	38.96		8.97589	-36.6769	-39.7146		-39.2346
2013-08-09 15:29:15	36.02	39		8.98283	-36.7176	-39.7554		-39.2754
2013-08-09 15:39:15	36.1	39.08		8.98977	-36.7992	-39.8369		-39.3569
2013-08-09 15:49:15	36.14	39.13		8.99672	-36.84	-39.8879		-39.4079
2013-08-09 15:59:15	36.22	39.23		9.00366	-36.9215	-39.9898	2013-08-09 15:59:15	-39.5098
2013-08-09 16:09:15	36.29	39.27		9.01061	-36.9929	-40.0306		-39.5506
2013-08-09 16:19:15	36.36	39.34		9.01755	-37.0642	-40.1019		-39.6219
2013-08-09 16:29:15	36.44	39.41		9.0245	-37.1458	-40.1733		-39.6933
2013-08-09 16:39:15	36.51	39.48		9.03144	-37.2171	-40.2446		-39.7646
2013-08-09 16:49:15	36.57	39.54		9.03839	-37.2783	-40.3058		-39.8258
2013-08-09 16:59:15	36.6	39.58		9.04533	-37.3089	-40.3466	2013-08-09 16:59:15	-39.8666
2013-08-09 17:09:15	36.65	39.63		9.05227	-37.3598	-40.3976		-39.9176
2013-08-09 17:19:15	36.74	39.71		9.05922	-37.4516	-40.4791		-39.9991
2013-08-09 17:29:15	36.76	39.8		9.06616	-37.472	-40.5708		-40.0908
2013-08-09 17:39:15	36.83	39.82		9.07311	-37.5433	-40.5912		-40.1112
2013-08-09 17:49:15	36.92	39.89		9.08005	-37.6351	-40.6626		-40.1826
2013-08-09 17:59:15	36.99	39.96		9.087	-37.7064	-40.7339	2013-08-09 17:59:15	-40.2539
2013-08-09 18:09:15	37.03	40.04		9.09394	-37.7472	-40.8155		-40.3355
2013-08-09 18:19:15	37.07	40.05		9.10089	-37.788	-40.8257		-40.3457
2013-08-09 18:29:15	37.14	40.1		9.10783	-37.8593	-40.8767		-40.3967
2013-08-09 18:39:15	36.54	39.53		9.11477	-37.2477	-40.2956		-39.8156
2013-08-09 18:49:15	36.76	39.76		9.12172	-37.472	-40.5301		-40.0501
2013-08-09 18:59:15	36.96	39.94		9.12866	-37.6758	-40.7136	2013-08-09 18:59:15	-40.2336
2013-08-09 19:09:15	37.11	40.09		9.13561	-37.8287	-40.8665		-40.3865
2013-08-09 19:19:15	37.16	40.17		9.14255	-37.8797	-40.948		-40.468
2013-08-09 19:29:15	37.23	40.22		9.1495	-37.9511	-40.999		-40.519
2013-08-09 19:39:15	37.21	40.21		9.15644	-37.9307	-40.9888		-40.5088
2013-08-09 19:49:15	37.32	40.32		9.16339	-38.0428	-41.1009		-40.6209
2013-08-09 19:59:15	37.44	40.41		9.17033	-38.1651	-41.1927	2013-08-09 19:59:15	-40.7127
2013-08-09 20:09:15	37.49	40.49		9.17727	-38.2161	-41.2742		-40.7942
2013-08-09 20:19:15	37.55	40.53		9.18422	-38.2773	-41.315		-40.835
2013-08-09 20:29:15	37.63	40.61		9.19116	-38.3588	-41.3965		-40.9165
2013-08-09 20:39:15	37.68	40.65		9.19811	-38.4098	-41.4373		-40.9573
2013-08-09 20:49:15	37.75	40.72		9.20505	-38.4811	-41.5087		-41.0287
2013-08-09 20:59:15	37.74	40.73		9.212	-38.4709	-41.5189	2013-08-09 20:59:15	-41.0389
2013-08-09 21:09:15	37.82	40.81		9.21894	-38.5525	-41.6004		-41.1204
2013-08-09 21:19:15	37.83	40.82		9.22589	-38.5627	-41.6106		-41.1306
2013-08-09 21:29:15	37.87	40.86		9.23283	-38.6035	-41.6514		-41.1714
2013-08-09 21:39:15	38	40.98		9.23977	-38.736	-41.7737		-41.2937
2013-08-09 21:49:15	37.99	40.99		9.24672	-38.7258	-41.7839		-41.3039
2013-08-09 21:59:15	38.03	41		9.25366	-38.7666	-41.7941	2013-08-09 21:59:15	-41.3141
2013-08-09 22:09:15	38.09	41.09		9.26061	-38.8277	-41.8858		-41.4058
2013-08-09 22:19:15	38.18	41.14		9.26755	-38.9195	-41.9368		-41.4568
2013-08-09 22:29:15	38.19	41.17		9.2745	-38.9297	-41.9674		-41.4874
2013-08-09 22:39:15	38.2	41.19		9.28144	-38.9399	-41.9878		-41.5078
2013-08-09 22:49:15	38.29	41.3		9.28839	-39.0316	-42.0999		-41.6199
2013-08-09 22:59:15	38.35	41.31		9.29533	-39.0928	-42.1101	2013-08-09 22:59:15	-41.6301
2013-08-09 23:09:15	38.34	41.32		9.30227	-39.0826	-42.1203		-41.6403
2013-08-09 23:19:15	38.34	41.31		9.30922	-39.0826	-42.1101		-41.6301
2013-08-09 23:29:15	38.42	41.42		9.31616	-39.1641	-42.2222		-41.7422
2013-08-09 23:39:15	38.47	41.45		9.32311	-39.2151	-42.2528		-41.7728
2013-08-09 23:49:15	38.51	41.49		9.33005	-39.2559	-42.2936		-41.8136
2013-08-09 23:59:15	38.53	41.52		9.337	-39.2762	-42.3242	2013-08-09 23:59:15	-41.8442
2013-08-10 00:09:15	38.59	41.59		9.34394	-39.3374	-42.3955		-41.9155
2013-08-10 00:19:15	38.63	41.63		9.35089	-39.3782	-42.4363		-41.9563
2013-08-10 00:29:15	38.67	41.65		9.35783	-39.419	-42.4567		-41.9767
2013-08-10 00:39:15	38.77	41.76		9.36477	-39.5209	-42.5688		-42.0888
2013-08-10 00:49:15	38.78	41.79		9.37172	-39.5311	-42.5994		-42.1194
2013-08-10 00:59:15	38.83	41.82		9.37866	-39.5821	-42.63	2013-08-10 00:59:15	-42.15
2013-08-10 01:09:15	38.86	41.85		9.38561	-39.6126	-42.6606		-42.1806
2013-08-10 01:19:15	38.91	41.9		9.39255	-39.6636	-42.7115		-42.2315
2013-08-10 01:29:15	38.97	41.97		9.3995	-39.7248	-42.7829		-42.3029
2013-08-10 01:39:15	39.02	42.01		9.40644	-39.7757	-42.8236		-42.3436
2013-08-10 01:49:15	39.07	42.06		9.41339	-39.8267	-42.8746		-42.3946
2013-08-10 01:59:15	39.12	42.12		9.42033	-39.8777	-42.9358	2013-08-10 01:59:15	-42.4558
2013-08-10 02:09:15	39.19	42.19		9.42727	-39.949	-43.0071		-42.5271
2013-08-10 02:19:15	39.23	42.22		9.43422	-39.9898	-43.0377		-42.5577
2013-08-10 02:29:15	39.3	42.32		9.44116	-40.0612	-43.1397		-42.6597
2013-08-10 02:39:15	39.38	42.37		9.44811	-40.1427	-43.1906		-42.7106
2013-08-10 02:49:15	39.39	42.39		9.45505	-40.1529	-43.211		-42.731
2013-08-10 02:59:15	39.44	42.43		9.462	-40.2039	-43.2518	2013-08-10 02:59:15	-42.7718
2013-08-10 03:09:15	39.47	42.47		9.46894	-40.2345	-43.2926		-42.8126
2013-08-10 03:19:15	39.55	42.53		9.47589	-40.316	-43.3537		-42.8737
2013-08-10 03:29:15	39.59	42.59		9.48283	-40.3568	-43.4149		-42.9349
2013-08-10 03:39:15	39.64	42.62		9.48977	-40.4077	-43.4455		-42.9655
2013-08-10 03:49:15	39.69	42.67		9.49672	-40.4587	-43.4964		-43.0164
2013-08-10 03:59:15	39.73	42.73		9.50366	-40.4995	-43.5576	2013-08-10 03:59:15	-43.0776
2013-08-10 04:09:15	39.8	42.79		9.51061	-40.5708	-43.6188		-43.1388
2013-08-10 04:19:15	39.86	42.84		9.51755	-40.632	-43.6697		-43.1897
2013-08-10 04:29:15	39.9	42.91		9.5245	-40.6728	-43.7411		-43.2611
2013-08-10 04:39:15	39.98	42.98		9.53144	-40.7543	-43.8124		-43.3324
2013-08-10 04:49:15	40.04	43.04		9.53839	-40.8155	-43.8736		-43.3936
2013-08-10 04:59:15	40.08	43.09		9.54533	-40.8563	-43.9246	2013-08-10 04:59:15	-43.4446
2013-08-10 05:09:15	40.15	43.14		9.55227	-40.9276	-43.9755		-43.4955
2013-08-10 05:19:15	40.2	43.19		9.55922	-40.9786	-44.0265		-43.5465
2013-08-10 05:29:15	40.22	43.23		9.56616	-40.999	-44.0673		-43.5873
2013-08-10 05:39:15	40.28	43.28		9.57311	-41.0601	-44.1182		-43.6382
2013-08-10 05:49:15	40.33	43.32		9.58005	-41.1111	-44.159		-43.679
2013-08-10 05:59:15	40.4	43.39		9.587	-41.1825	-44.2304	2013-08-10 05:59:15	-43.7504
2013-08-10 06:09:15	40.45	43.45		9.59394	-41.2334	-44.2915		-43.8115
2013-08-10 06:19:15	40.5	43.51		9.60089	-41.2844	-44.3527		-43.8727
2013-08-10 06:29:15	40.51	43.57		9.60783	-41.2946	-44.4139		-43.9339
2013-08-10 06:39:15	40.59	43.6		9.61477	-41.3761	-44.4444		-43.9644
2013-08-10 06:49:15	40.66	43.67		9.62172	-41.4475	-44.5158		-44.0358
2013-08-10 06:59:15	40.69	43.7		9.62866	-41.4781	-44.5464	2013-08-10 06:59:15	-44.0664
2013-08-10 07:09:15	40.76	43.75		9.63561	-41.5494	-44.5973		-44.1173
2013-08-10 07:19:15	40.8	43.79		9.64255	-41.5902	-44.6381		-44.1581
2013-08-10 07:29:15	40.82	43.84		9.6495	-41.6106	-44.6891		-44.2091
2013-08-10 07:39:15	40.87	43.88		9.65644	-41.6616	-44.7299		-44.2499
2013-08-10 07:49:15	40.94	43.94		9.66339	-41.7329	-44.791		-44.311
2013-08-10 07:59:15	40.99	44		9.67033	-41.7839	-44.8522	2013-08-10 07:59:15	-44.3722
2013-08-10 08:09:15	41.06	44.04		9.67727	-41.8552	-44.893		-44.413
2013-08-10 08:19:15	41.13	44.13		9.68422	-41.9266	-44.9847		-44.5047
2013-08-10 08:29:15	41.19	44.15		9.69116	-41.9878	-45.0051		-44.5251
2013-08-10 08:39:15	41.25	44.25		9.69811	-42.0489	-45.107		-44.627
2013-08-10 08:49:15	41.3	44.31		9.70505	-42.0999	-45.1682		-44.6882
2013-08-10 08:59:15	41.37	44.4		9.712	-42.1713	-45.2599	2013-08-10 08:59:15	-44.7799
2013-08-10 09:09:15	41.44	44.44		9.71894	-42.2426	-45.3007		-44.8207
2013-08-10 09:19:15	41.48	44.47		9.72589	-42.2834	-45.3313		-44.8513
2013-08-10 09:29:15	41.51	44.53		9.73283	-42.314	-45.3925		-44.9125
2013-08-10 09:39:15	41.61	44.6		9.73977	-42.4159	-45.4638		-44.9838
2013-08-10 09:49:15	41.6	44.6		9.74672	-42.4057	-45.4638		-44.9838
2013-08-10 09:59:15	41.64	44.68		9.75366	-42.4465	-45.5454	2013-08-10 09:59:15	-45.0654
2013-08-10 10:09:15	41.78	44.77		9.76061	-42.5892	-45.6371		-45.1571
2013-08-10 10:19:15	41.78	44.78		9.76755	-42.5892	-45.6473		-45.1673
2013-08-10 10:29:15	41.92	44.92		9.7745	-42.7319	-45.79		-45.31
2013-08-10 10:39:15	41.96	44.94		9.78144	-42.7727	-45.8104		-45.3304
2013-08-10 10:49:15	42.02	45.01		9.78839	-42.8338	-45.8818		-45.4018
2013-08-10 10:59:15	41.99	45		9.79533	-42.8033	-45.8716	2013-08-10 10:59:15	-45.3916
2013-08-10 11:09:15	42.12	45.12		9.80227	-42.9358	-45.9939		-45.5139
2013-08-10 11:19:15	42.14	45.16		9.80922	-42.9562	-46.0347		-45.5547
2013-08-10 11:29:15	42.27	45.26		9.81616	-43.0887	-46.1366		-45.6566
2013-08-10 11:39:15	42.31	45.25		9.82311	-43.1295	-46.1264		-45.6464
2013-08-10 11:49:15	42.39	45.39		9.83005	-43.211	-46.2691		-45.7891
2013-08-10 12:09:15	42.47	45.49		9.84394	-43.2926	-46.371	2013-08-10 12:09:15	-45.891
2013-08-10 12:19:15	42.51	45.5		9.85089	-43.3333	-46.3812		-45.9012
2013-08-10 12:29:15	42.52	45.59		9.85783	-43.3435	-46.473		-45.993
2013-08-10 12:39:15	42.62	45.62		9.86477	-43.4455	-46.5036		-46.0236
2013-08-10 12:49:15	42.69	45.7		9.87172	-43.5168	-46.5851		-46.1051
2013-08-10 12:59:15	42.76	45.78		9.87866	-43.5882	-46.6667		-46.1867
2013-08-10 13:09:15	42.83	45.84		9.88561	-43.6595	-46.7278	2013-08-10 13:09:15	-46.2478
2013-08-10 13:19:15	42.91	45.93		9.89255	-43.7411	-46.8196		-46.3396
2013-08-10 13:29:15	42.91	45.88		9.8995	-43.7411	-46.7686		-46.2886
2013-08-10 13:39:15	43	45.99		9.90644	-43.8328	-46.8807		-46.4007
2013-08-10 13:49:15	42.95	45.96		9.91339	-43.7819	-46.8502		-46.3702
2013-08-10 13:59:15	43.06	46.16		9.92033	-43.894	-47.054		-46.574
2013-08-10 14:09:15	43.1	46.07		9.92727	-43.9348	-46.9623	2013-08-10 14:09:15	-46.4823
2013-08-10 14:19:15	43.17	46.18		9.93422	-44.0061	-47.0744		-46.5944
2013-08-10 14:29:15	43.19	46.23		9.94116	-44.0265	-47.1254		-46.6454
2013-08-10 14:39:15	43.33	46.34		9.94811	-44.1692	-47.2375		-46.7575
2013-08-10 14:49:15	43.41	46.44		9.95505	-44.2508	-47.3394		-46.8594
2013-08-10 14:59:15	43.47	46.45		9.962	-44.3119	-47.3496		-46.8696
2013-08-10 15:09:15	43.56	46.57		9.96894	-44.4037	-47.472	2013-08-10 15:09:15	-46.992
2013-08-10 15:19:15	43.6	46.62		9.97589	-44.4444	-47.5229		-47.0429
2013-08-10 15:29:15	43.65	46.65		9.98283	-44.4954	-47.5535		-47.0735
2013-08-10 15:39:15	43.75	46.78		9.98977	-44.5973	-47.686		-47.206
2013-08-10 15:59:15	43.9	46.91		10.0037	-44.7503	-47.8186		-47.3386
2013-08-10 16:09:15	43.89	46.92		10.0106	-44.7401	-47.8287		-47.3487
2013-08-10 16:19:15	44.03	47.04		10.0176	-44.8828	-47.9511	2013-08-10 16:19:15	-47.4711
2013-08-10 16:29:15	44.13	47.14		10.0245	-44.9847	-48.053		-47.573
2013-08-10 16:39:15	44.19	47.23		10.0314	-45.0459	-48.1448		-47.6648
2013-08-10 16:49:15	44.25	47.26		10.0384	-45.107	-48.1753		-47.6953
2013-08-10 16:59:15	44.32	47.34		10.0453	-45.1784	-48.2569		-47.7769
2013-08-10 17:09:15	44.41	47.46		10.0523	-45.2701	-48.3792		-47.8992
2013-08-10 17:19:15	44.5	47.5		10.0592	-45.3619	-48.42	2013-08-10 17:19:15	-47.94
2013-08-10 17:29:15	44.56	47.57		10.0662	-45.423	-48.4913		-48.0113
2013-08-10 17:39:15	44.64	47.66		10.0731	-45.5046	-48.5831		-48.1031
2013-08-10 17:49:15	44.45	47.73		10.0801	-45.3109	-48.6544		-48.1744
2013-08-10 17:59:15	44.68	47.7		10.087	-45.5454	-48.6239		-48.1439
2013-08-10 18:09:15	44.75	47.76		10.0939	-45.6167	-48.685		-48.205
2013-08-10 18:19:15	44.81	47.8		10.1009	-45.6779	-48.7258	2013-08-10 18:19:15	-48.2458
2013-08-10 18:29:15	44.88	47.91		10.1078	-45.7492	-48.8379		-48.3579
2013-08-10 18:39:15	44.96	47.97		10.1148	-45.8308	-48.8991		-48.4191
2013-08-10 18:49:15	45.02	48.03		10.1217	-45.8919	-48.9602		-48.4802
2013-08-10 18:59:15	45.11	48.12		10.1287	-45.9837	-49.052		-48.572
2013-08-10 19:09:15	45.19	48.18		10.1356	-46.0652	-49.1131		-48.6331
2013-08-10 19:19:15	45.27	48.26		10.1426	-46.1468	-49.1947	2013-08-10 19:19:15	-48.7147
2013-08-10 19:29:15	45.31	48.29		10.1495	-46.1876	-49.2253		-48.7453
2013-08-10 19:39:15	45.41	48.43		10.1564	-46.2895	-49.368		-48.888
2013-08-10 19:49:15	45.45	48.45		10.1634	-46.3303	-49.3884		-48.9084
2013-08-10 19:59:15	45.54	48.54		10.1703	-46.422	-49.4801		-49.0001
2013-08-10 20:09:15	45.59	48.58		10.1773	-46.473	-49.5209		-49.0409
2013-08-10 20:19:15	45.68	48.68		10.1842	-46.5647	-49.6228	2013-08-10 20:19:15	-49.1428
2013-08-10 20:29:15	45.75	48.74		10.1912	-46.6361	-49.684		-49.204
2013-08-10 20:39:15	45.75	48.76		10.1981	-46.6361	-49.7044		-49.2244
2013-08-10 20:49:15	45.88	48.88		10.2051	-46.7686	-49.8267		-49.3467
2013-08-10 20:59:15	45.93	48.93		10.212	-46.8196	-49.8777		-49.3977
2013-08-10 21:09:15	45.95	48.93		10.2189	-46.84	-49.8777		-49.3977
2013-08-10 21:19:15	46.01	49.06		10.2259	-46.9011	-50.0102	2013-08-10 21:19:15	-49.5302
2013-08-10 21:29:15	46.12	49.1		10.2328	-47.0133	-50.051		-49.571
2013-08-10 21:39:15	46.11	49.1		10.2398	-47.0031	-50.051		-49.571
2013-08-10 21:49:15	46.15	49.14		10.2467	-47.0438	-50.0917		-49.6117
2013-08-10 21:59:15	46.29	49.3		10.2537	-47.1865	-50.2548		-49.7748
2013-08-10 22:09:15	46.35	49.34		10.2606	-47.2477	-50.2956		-49.8156
2013-08-10 22:19:15	46.37	49.39		10.2676	-47.2681	-50.3466	2013-08-10 22:19:15	-49.8666
2013-08-10 22:29:15	46.44	49.43		10.2745	-47.3394	-50.3874		-49.9074
2013-08-10 22:39:15	46.54	49.58		10.2814	-47.4414	-50.5403		-50.0603
2013-08-10 22:49:15	46.59	49.59		10.2884	-47.4924	-50.5505		-50.0705
2013-08-10 22:59:15	46.65	49.65		10.2953	-47.5535	-50.6116		-50.1316
2013-08-10 23:09:15	46.7	49.72		10.3023	-47.6045	-50.683		-50.203
2013-08-10 23:19:15	46.74	49.76		10.3092	-47.6453	-50.7238	2013-08-10 23:19:15	-50.2438
2013-08-10 23:29:15	46.78	49.8		10.3162	-47.686	-50.7645		-50.2845
2013-08-10 23:39:15	46.87	49.92		10.3231	-47.7778	-50.8869		-50.4069
2013-08-10 23:49:15	46.95	49.94		10.3301	-47.8593	-50.9072		-50.4272
2013-08-10 23:59:15	46.99	50.02		10.337	-47.9001	-50.9888		-50.5088
2013-08-11 00:09:15	47.05	50.08		10.3439	-47.9613	-51.0499		-50.5699
2013-08-11 00:19:15	47.11	50.13		10.3509	-48.0224	-51.1009	2013-08-11 00:19:15	-50.6209
2013-08-11 00:29:15	47.18	50.2		10.3578	-48.0938	-51.1723		-50.6923
2013-08-11 00:39:15	47.26	50.26		10.3648	-48.1753	-51.2334		-50.7534
2013-08-11 00:49:15	47.3	50.32		10.3717	-48.2161	-51.2946		-50.8146
2013-08-11 00:59:15	47.38	50.4		10.3787	-48.2977	-51.3761		-50.8961
2013-08-11 01:09:15	47.45	50.47		10.3856	-48.369	-51.4475		-50.9675
2013-08-11 01:19:15	47.53	50.55		10.3926	-48.4506	-51.5291	2013-08-11 01:19:15	-51.0491
2013-08-11 01:29:15	47.61	50.63		10.3995	-48.5321	-51.6106		-51.1306
2013-08-11 01:39:15	47.64	50.67		10.4064	-48.5627	-51.6514		-51.1714
2013-08-11 01:49:15	47.71	50.76		10.4134	-48.634	-51.7431		-51.2631
2013-08-11 01:59:15	47.78	50.79		10.4203	-48.7054	-51.7737		-51.2937
2013-08-11 02:09:15	47.84	50.86		10.4273	-48.7666	-51.8451		-51.3651
2013-08-11 02:19:15	47.95	51		10.4342	-48.8787	-51.9878	2013-08-11 02:19:15	-51.5078
2013-08-11 02:29:15	48.02	51.03		10.4412	-48.9501	-52.0183		-51.5383
2013-08-11 02:39:15	48.11	51.14		10.4481	-49.0418	-52.1305		-51.6505
2013-08-11 02:49:15	48.2	51.23		10.4551	-49.1335	-52.2222		-51.7422
2013-08-11 02:59:15	48.26	51.3		10.462	-49.1947	-52.2936		-51.8136
2013-08-11 03:09:15	48.39	51.42		10.4689	-49.3272	-52.4159		-51.9359
2013-08-11 03:19:15	48.48	51.49		10.4759	-49.419	-52.4873	2013-08-11 03:19:15	-52.0073
2013-08-11 03:29:15	48.56	51.59		10.4828	-49.5005	-52.5892		-52.1092
2013-08-11 03:39:15	48.67	51.7		10.4898	-49.6126	-52.7013		-52.2213
2013-08-11 03:49:15	48.75	51.78		10.4967	-49.6942	-52.7829		-52.3029
2013-08-11 03:59:15	48.83	51.82		10.5037	-49.7757	-52.8236		-52.3436
2013-08-11 04:09:15	48.9	51.94		10.5106	-49.8471	-52.946		-52.466
2013-08-11 04:19:15	48.97	52.01		10.5176	-49.9185	-53.0173	2013-08-11 04:19:15	-52.5373
2013-08-11 04:29:15	49.09	52.12		10.5245	-50.0408	-53.1295		-52.6495
2013-08-11 04:39:15	49.18	52.22		10.5314	-50.1325	-53.2314		-52.7514
2013-08-11 04:49:15	49.25	52.31		10.5384	-50.2039	-53.3231		-52.8431
2013-08-11 04:59:15	49.38	52.4		10.5453	-50.3364	-53.4149		-52.9349
2013-08-11 05:09:15	49.46	52.49		10.5523	-50.4179	-53.5066		-53.0266
2013-08-11 05:19:15	49.55	52.6		10.5592	-50.5097	-53.6188	2013-08-11 05:19:15	-53.1388
2013-08-11 05:29:15	48.36	51.45		10.5662	-49.2966	-52.4465		-51.9665
2013-08-11 05:39:15	48.73	51.77		10.5731	-49.6738	-52.7727		-52.2927
2013-08-11 05:49:15	49.01	52.03		10.5801	-49.9592	-53.0377		-52.5577
2013-08-11 05:59:15	49.21	52.25		10.587	-50.1631	-53.262		-52.782
2013-08-11 06:09:15	49.4	52.45		10.5939	-50.3568	-53.4659		-52.9859
2013-08-11 06:19:15	49.55	52.59		10.6009	-50.5097	-53.6086	2013-08-11 06:19:15	-53.1286
2013-08-11 06:29:15	49.68	52.72		10.6078	-50.6422	-53.7411		-53.2611
2013-08-11 06:39:15	49.82	52.85		10.6148	-50.7849	-53.8736		-53.3936
2013-08-11 06:49:15	49.95	52.99		10.6217	-50.9174	-54.0163		-53.5363
2013-08-11 06:59:15	50.04	53.08		10.6287	-51.0092	-54.1081		-53.6281
2013-08-11 07:09:15	50.14	53.18		10.6356	-51.1111	-54.21		-53.73
2013-08-11 07:19:15	50.23	53.26		10.6426	-51.2029	-54.2915	2013-08-11 07:19:15	-53.8115
2013-08-11 07:29:15	50.31	53.36		10.6495	-51.2844	-54.3935		-53.9135
2013-08-11 07:39:15	50.4	53.47		10.6564	-51.3761	-54.5056		-54.0256
2013-08-11 07:49:15	50.52	53.55		10.6634	-51.4985	-54.5872		-54.1072
2013-08-11 07:59:15	50.61	53.66		10.6703	-51.5902	-54.6993		-54.2193
2013-08-11 08:09:15	50.7	53.73		10.6773	-51.682	-54.7706		-54.2906
2013-08-11 08:19:15	50.81	53.84		10.6842	-51.7941	-54.8828	2013-08-11 08:19:15	-54.4028
2013-08-11 08:29:15	50.88	53.92		10.6912	-51.8654	-54.9643		-54.4843
2013-08-11 08:39:15	50.97	54.02		10.6981	-51.9572	-55.0663		-54.5863
2013-08-11 08:49:15	51.08	54.13		10.7051	-52.0693	-55.1784		-54.6984
2013-08-11 08:59:15	51.2	54.23		10.712	-52.1916	-55.2803		-54.8003
2013-08-11 09:09:15	51.24	54.3		10.7189	-52.2324	-55.3517		-54.8717
2013-08-11 09:19:15	51.33	54.41		10.7259	-52.3242	-55.4638	2013-08-11 09:19:15	-54.9838
2013-08-11 09:29:15	51.45	54.49		10.7328	-52.4465	-55.5454		-55.0654
2013-08-11 09:39:15	51.53	54.6		10.7398	-52.528	-55.6575		-55.1775
2013-08-11 09:49:15	51.61	54.66		10.7467	-52.6096	-55.7187		-55.2387
2013-08-11 09:59:15	51.72	54.77		10.7537	-52.7217	-55.8308		-55.3508
2013-08-11 10:09:15	51.82	54.87		10.7606	-52.8236	-55.9327		-55.4527
2013-08-11 10:19:15	51.9	54.96		10.7676	-52.9052	-56.0245	2013-08-11 10:19:15	-55.5445
2013-08-11 10:29:15	51.96	55.02		10.7745	-52.9664	-56.0856		-55.6056
2013-08-11 10:39:15	52.01	55.09		10.7814	-53.0173	-56.157		-55.677
2013-08-11 10:49:15	52.13	55.17		10.7884	-53.1397	-56.2385		-55.7585
2013-08-11 10:59:15	52.19	55.24		10.7953	-53.2008	-56.3099		-55.8299
2013-08-11 11:09:15	52.27	55.31		10.8023	-53.2824	-56.3812		-55.9012
2013-08-11 11:19:15	52.35	55.41		10.8092	-53.3639	-56.4832	2013-08-11 11:19:15	-56.0032
2013-08-11 11:29:15	52.42	55.49		10.8162	-53.4353	-56.5647		-56.0847
2013-08-11 11:39:15	52.51	55.61		10.8231	-53.527	-56.6871		-56.2071
2013-08-11 11:49:15	52.65	55.71		10.8301	-53.6697	-56.789		-56.309
2013-08-11 11:59:15	52.71	55.77		10.837	-53.7309	-56.8502		-56.3702
2013-08-11 12:09:15	52.78	55.92		10.8439	-53.8022	-57.0031		-56.5231
2013-08-11 12:19:15	52.95	56		10.8509	-53.9755	-57.0846	2013-08-11 12:19:15	-56.6046
2013-08-11 12:29:15	53	56.05		10.8578	-54.0265	-57.1356		-56.6556
2013-08-11 12:39:15	53.13	56.23		10.8648	-54.159	-57.3191		-56.8391
2013-08-11 12:49:15	53.24	56.29		10.8717	-54.2712	-57.3802		-56.9002
2013-08-11 12:59:15	53.32	56.38		10.8787	-54.3527	-57.472		-56.992
2013-08-11 13:09:15	53.48	56.56		10.8856	-54.5158	-57.6555		-57.1755
2013-08-11 13:19:15	53.55	56.62		10.8926	-54.5872	-57.7166	2013-08-11 13:19:15	-57.2366
2013-08-11 13:29:15	53.69	56.75		10.8995	-54.7299	-57.8491		-57.3691
2013-08-11 13:39:15	53.84	56.9		10.9064	-54.8828	-58.002		-57.522
2013-08-11 13:49:15	53.91	56.97		10.9134	-54.9541	-58.0734		-57.5934
2013-08-11 13:59:15	53.99	57.06		10.9203	-55.0357	-58.1651		-57.6851
2013-08-11 14:09:15	54.05	57.11		10.9273	-55.0968	-58.2161		-57.7361
2013-08-11 14:19:15	54.13	57.21		10.9342	-55.1784	-58.318	2013-08-11 14:19:15	-57.838
2013-08-11 14:29:15	54.24	57.32		10.9412	-55.2905	-58.4302		-57.9502
2013-08-11 14:39:15	54.44	57.5		10.9481	-55.4944	-58.6137		-58.1337
2013-08-11 14:49:15	54.48	57.54		10.9551	-55.5352	-58.6544		-58.1744
2013-08-11 14:59:15	54.56	57.65		10.962	-55.6167	-58.7666		-58.2866
2013-08-11 15:09:15	54.67	57.73		10.9689	-55.7288	-58.8481		-58.3681
2013-08-11 15:19:15	54.68	57.76		10.9759	-55.739	-58.8787	2013-08-11 15:19:15	-58.3987
2013-08-11 15:29:15	54.88	57.9		10.9828	-55.9429	-59.0214		-58.5414
2013-08-11 15:39:15	54.9	57.94		10.9898	-55.9633	-59.0622		-58.5822
2013-08-11 15:49:15	54.92	58.02		10.9967	-55.9837	-59.1437		-58.6637
2013-08-11 15:59:15	55.05	58.14		11.0037	-56.1162	-59.2661		-58.7861
2013-08-11 16:09:15	55.1	58.2		11.0106	-56.1672	-59.3272		-58.8472
2013-08-11 16:19:15	55.21	58.31		11.0176	-56.2793	-59.4393	2013-08-11 16:19:15	-58.9593
2013-08-11 16:29:15	55.29	58.39		11.0245	-56.3609	-59.5209		-59.0409
2013-08-11 16:39:15	55.47	58.61		11.0314	-56.5443	-59.7452		-59.2652
2013-08-11 16:59:15	55.68	58.74		11.0453	-56.7584	-59.8777		-59.3977
2013-08-11 17:09:15	55.76	58.83		11.0523	-56.84	-59.9694		-59.4894
2013-08-11 17:19:15	55.9	59.1		11.0592	-56.9827	-60.2446		-59.7646
2013-08-11 17:29:15	56.05	59.12		11.0662	-57.1356	-60.265	2013-08-11 17:29:15	-59.785
2013-08-11 17:39:15	56.12	59.21		11.0731	-57.2069	-60.3568		-59.8768
2013-08-11 17:49:15	56.19	59.27		11.0801	-57.2783	-60.4179		-59.9379
2013-08-11 17:59:15	56.4	59.5		11.087	-57.4924	-60.6524		-60.1724
2013-08-11 18:09:15	56.45	59.53		11.0939	-57.5433	-60.683		-60.203
2013-08-11 18:19:15	56.54	59.62		11.1009	-57.6351	-60.7747		-60.2947
2013-08-11 18:29:15	56.62	59.72		11.1078	-57.7166	-60.8767	2013-08-11 18:29:15	-60.3967
2013-08-11 18:39:15	56.81	59.92		11.1148	-57.9103	-61.0805		-60.6005
2013-08-11 18:49:15	56.86	59.94		11.1217	-57.9613	-61.1009		-60.6209
2013-08-11 18:59:15	56.95	60.04		11.1287	-58.053	-61.2029		-60.7229
2013-08-11 19:09:15	57.08	60.22		11.1356	-58.1855	-61.3863		-60.9063
2013-08-11 19:19:15	57.22	60.28		11.1426	-58.3282	-61.4475		-60.9675
2013-08-11 19:29:15	57.31	60.38		11.1495	-58.42	-61.5494	2013-08-11 19:29:15	-61.0694
2013-08-11 19:39:15	57.45	60.58		11.1564	-58.5627	-61.7533		-61.2733
2013-08-11 19:49:15	57.54	60.63		11.1634	-58.6544	-61.8043		-61.3243
2013-08-11 19:59:15	57.61	60.73		11.1703	-58.7258	-61.9062		-61.4262
2013-08-11 20:09:15	57.72	60.76		11.1773	-58.8379	-61.9368		-61.4568
2013-08-11 20:19:15	57.83	60.93		11.1842	-58.9501	-62.1101		-61.6301
2013-08-11 20:29:15	57.82	60.99		11.1912	-58.9399	-62.1713	2013-08-11 20:29:15	-61.6913
2013-08-11 20:39:15	58.03	61.15		11.1981	-59.1539	-62.3344		-61.8544
2013-08-11 20:49:15	58.1	61.21		11.2051	-59.2253	-62.3955		-61.9155
2013-08-11 20:59:15	58.2	61.31		11.212	-59.3272	-62.4975		-62.0175
2013-08-11 21:09:15	58.28	61.42		11.2189	-59.4088	-62.6096		-62.1296
2013-08-11 21:19:15	58.4	61.52		11.2259	-59.5311	-62.7115		-62.2315
2013-08-11 21:29:15	58.49	61.64		11.2328	-59.6228	-62.8338	2013-08-11 21:29:15	-62.3538
2013-08-11 21:39:15	58.61	61.75		11.2398	-59.7452	-62.946		-62.466
2013-08-11 21:49:15	58.68	61.86		11.2467	-59.8165	-63.0581		-62.5781
2013-08-11 21:59:15	58.79	61.9		11.2537	-59.9286	-63.0989		-62.6189
2013-08-11 22:09:15	58.9	62.03		11.2606	-60.0408	-63.2314		-62.7514
2013-08-11 22:19:15	59.02	62.16		11.2676	-60.1631	-63.3639		-62.8839
2013-08-11 22:29:15	59.15	62.33		11.2745	-60.2956	-63.5372	2013-08-11 22:29:15	-63.0572
[truncated: 2,908 more rows]

## Sheet: Tensi
Zeit [d]	MP bot(2) [cm]	MP top(1) [cm]		air entry bot		AE time	AE [cm]	Type	Pos	Weight
0.0106073	-1.83486	-4.37219		2013-08-31 17:39:15	8800	31.0731	-8970.44	1	2	1
0.0244962	-1.67176	-4.17851
0.0661628	-2.19164	-4.70858		air entry top
0.107829	-2.14067	-4.66781		Time					Pos	Weight
0.149496	-2.51784	-5.02459		2013-08-26 16:09:15	8800	26.0106	-8970.44	1	1	1
0.205052	-3.09888	-5.58524
0.267552	-3.73089	-6.19686
0.309218	-3.69011	-6.17647
0.350885	-4.12844	-6.59441
0.392552	-4.52599	-6.93081
0.434218	-5.09684	-7.31817
0.475885	-5.47401	-7.63417
0.517552	-5.84098	-7.95017
0.559218	-6.19776	-8.24579
0.600885	-6.53415	-8.5516
0.642552	-6.80938	-8.82683
0.684218	-6.90112	-8.89819
0.725885	-7.2579	-9.26516
0.781441	-7.14577	-9.15303
0.830052	-7.47197	-9.45884
0.871718	-7.84913	-9.82581
0.913385	-8.26707	-10.2438
0.955052	-8.48114	-10.468
0.996718	-7.78797	-9.76465
1.03839	-8.7156	-10.6923
1.08005	-8.99083	-10.9777
1.12172	-9.39857	-11.4058
1.16339	-9.57187	-11.5689
1.20505	-9.1947	-11.2325
1.24672	-9.50051	-11.5383
1.28839	-9.89806	-11.9563
1.33005	-10.051	-12.1194
1.37172	-10.265	-12.3335
1.42727	-10.3364	-12.4252
1.46894	-10.5505	-12.6597
1.51755	-10.4587	-12.5679
1.55922	-10.7951	-12.9247
1.60089	-10.8155	-12.9451
1.64255	-11.0703	-13.1999
1.68422	-11.2436	-13.4038
1.72589	-11.3558	-13.5159
1.76755	-11.5189	-13.6892
1.80922	-11.7227	-13.8931
1.85089	-11.7941	-13.9644
1.8995	-12.1713	-14.3314
1.94116	-12.4363	-14.6168
1.98283	-12.5688	-14.7596
2.0245	-12.844	-15.0654
2.06616	-13.1295	-15.3304
2.10783	-13.4047	-15.626
2.1495	-13.4862	-15.7076
2.19116	-13.8022	-16.0338
2.23283	-14.0163	-16.2784
2.2745	-14.1998	-16.4721
2.31616	-14.475	-16.7575
2.35783	-14.526	-16.8289
2.3995	-14.7299	-17.0531
2.44116	-14.8012	-17.1245
2.48977	-14.9847	-17.3182
2.53144	-15.158	-17.4915
2.57311	-15.2701	-17.624
2.61477	-15.3619	-17.7259
2.65644	-15.3517	-17.7055
2.69811	-14.6279	-16.992
2.73977	-15.1478	-17.5424
2.78144	-15.4842	-17.8788
2.82311	-15.5657	-17.9604
2.86477	-15.8104	-18.205
2.90644	-15.9021	-18.3171
2.94811	-16.208	-18.623
2.98977	-16.4118	-18.8268
3.03144	-16.5647	-18.9899
3.07311	-16.7482	-19.1836
3.11477	-16.789	-19.2346
3.15644	-16.8909	-19.3569
3.20505	-16.9827	-19.4486
3.24672	-16.9317	-19.3773
3.28839	-17.0744	-19.5302
3.337	-17.156	-19.6219
3.37866	-17.2885	-19.7646
3.42033	-17.3191	-19.7748
3.462	-17.4414	-19.9176
3.50366	-17.5535	-20.0297
3.54533	-17.6147	-20.101
3.587	-17.7574	-20.2438
3.62866	-17.8899	-20.3661
3.67033	-17.9817	-20.468
3.712	-18.1346	-20.6107
3.75366	-18.2263	-20.7229
3.79533	-18.2467	-20.7127
3.837	-18.42	-20.886
3.88561	-18.5423	-21.0287
3.92727	-18.7156	-21.1918
3.96894	-18.8685	-21.3345
4.01061	-18.9195	-21.3956
4.05227	-19.1539	-21.6199
4.09394	-19.3476	-21.8136
4.13561	-19.5311	-21.9869
4.17727	-19.6738	-22.1602
4.21894	-19.7248	-22.2213
4.26061	-19.8267	-22.3233
4.30227	-19.9185	-22.4048
4.34394	-19.9898	-22.4762
4.38561	-20.1529	-22.6393
4.42727	-20.1835	-22.68
4.46894	-20.2956	-22.782
4.51061	-20.4383	-22.9247
4.55227	-20.5607	-23.047
4.59394	-20.6728	-23.1693
4.63561	-20.7238	-23.2101
4.67727	-20.8563	-23.3426
4.71894	-20.9582	-23.4446
4.76061	-21.1417	-23.6382
4.80227	-21.315	-23.8115
4.84394	-21.4883	-23.9746
4.88561	-21.5698	-24.0766
4.92727	-21.6922	-24.1785
4.96894	-21.9164	-24.413
5.0245	-22.2324	-24.729
5.06616	-22.4771	-24.9838
5.10783	-22.7319	-25.2183
5.1495	-22.9154	-25.4119
5.19116	-23.0683	-25.5649
5.23283	-23.1397	-25.6362
5.2745	-23.3129	-25.8197
5.31616	-23.4251	-25.9522
5.35783	-23.5066	-26.0032
5.3995	-23.5678	-26.0745
5.44116	-23.7003	-26.2172
5.48283	-23.7819	-26.2886
5.5245	-23.8634	-26.3702
5.56616	-23.9348	-26.4517
5.60783	-23.9857	-26.5027
5.6495	-23.9042	-26.5333
5.69116	-24.1998	-26.7167
5.73283	-24.3119	-26.8391
5.7745	-24.4343	-26.9716
5.81616	-24.5872	-27.1041
5.85783	-24.7197	-27.2366
5.90644	-24.6687	-27.1755
5.94811	-25.0153	-27.5322
5.98977	-25.3211	-27.838
6.03144	-25.5861	-28.1031
6.07311	-25.841	-28.3579
6.11477	-26.0754	-28.572
6.15644	-26.2487	-28.7453
6.19811	-26.371	-28.8778
6.23977	-26.5341	-29.0511
6.28144	-26.6565	-29.1632
6.32311	-26.7176	-29.2448
6.36477	-26.7992	-29.3161
6.40644	-26.8909	-29.4079
6.44811	-27.0031	-29.52
6.48977	-27.105	-29.6423
6.53144	-27.2171	-29.7443
6.57311	-27.3394	-29.8666
6.61477	-27.3802	-29.9074
6.65644	-27.5637	-30.101
6.69811	-27.6656	-30.1724
6.73977	-27.7778	-30.3049
6.78144	-27.9409	-30.4782
6.82311	-28.0632	-30.5903
6.86477	-28.1753	-30.7025
6.90644	-28.2467	-30.7942
6.94811	-28.42	-30.9573
6.99672	-28.5321	-31.0796
7.03839	-28.6748	-31.2223
7.08005	-28.8073	-31.3447
7.12172	-28.8889	-31.4262
7.16339	-29.052	-31.5995
7.20505	-29.1233	-31.6505
7.24672	-29.2253	-31.7524
7.28839	-29.3578	-31.9053
7.33005	-29.4903	-32.0175
7.37172	-29.6024	-32.1296
7.41339	-29.684	-32.2213
7.45505	-29.8165	-32.3538
7.49672	-29.8777	-32.415
7.53839	-30.0102	-32.5373
7.58005	-30.1325	-32.6698
7.62172	-30.2548	-32.7922
7.66339	-30.3568	-32.8839
7.70505	-30.2956	-32.8329
7.74672	-30.5199	-33.0674
7.78839	-30.6524	-33.1999
7.83005	-30.897	-33.4446
7.87172	-31.0703	-33.6281
7.91339	-31.2436	-33.781
7.95505	-31.4067	-33.9339
7.99672	-31.5698	-34.1072
8.03839	-31.7125	-34.2601
8.08005	-31.8654	-34.4232
8.12172	-32.0999	-34.6474
8.16339	-32.3038	-34.8615
8.20505	-32.3344	-34.8819
8.24672	-32.63	-35.2081
8.28839	-32.8338	-35.361
8.33005	-33.0071	-35.5547
8.37172	-33.211	-35.7687
8.41339	-33.4149	-35.9522
8.45505	-33.5984	-36.1561
8.49672	-33.8022	-36.36
8.53839	-34.0367	-36.5944
8.58005	-34.2915	-36.8289
8.62866	-34.5362	-37.0837
8.67033	-34.6687	-37.2264
8.712	-34.8828	-37.4405
8.75366	-35.1682	-37.7157
8.79533	-35.4638	-38.0113
8.837	-35.6779	-38.2254
8.87866	-35.9735	-38.5312
8.92033	-36.2283	-38.7759
8.962	-36.5851	-39.1224
9.00366	-36.9215	-39.5098
9.04533	-37.3089	-39.8666
9.087	-37.7064	-40.2539
9.12866	-37.6758	-40.2336
9.17033	-38.1651	-40.7127
9.212	-38.4709	-41.0389
9.25366	-38.7666	-41.3141
9.29533	-39.0928	-41.6301
9.337	-39.2762	-41.8442
9.37866	-39.5821	-42.15
9.42033	-39.8777	-42.4558
9.462	-40.2039	-42.7718
9.50366	-40.4995	-43.0776
9.54533	-40.8563	-43.4446
9.587	-41.1825	-43.7504
9.62866	-41.4781	-44.0664
9.67033	-41.7839	-44.3722
9.712	-42.1713	-44.7799
9.75366	-42.4465	-45.0654
9.79533	-42.8033	-45.3916
9.84394	-43.2926	-45.891
9.88561	-43.6595	-46.2478
9.92727	-43.9348	-46.4823
9.96894	-44.4037	-46.992
10.0176	-44.8828	-47.4711
10.0592	-45.3619	-47.94
10.1009	-45.6779	-48.2458
10.1426	-46.1468	-48.7147
10.1842	-46.5647	-49.1428
10.2259	-46.9011	-49.5302
10.2676	-47.2681	-49.8666
10.3092	-47.6453	-50.2438
10.3509	-48.0224	-50.6209
10.3926	-48.4506	-51.0491
10.4342	-48.8787	-51.5078
10.4759	-49.419	-52.0073
10.5176	-49.9185	-52.5373
10.5592	-50.5097	-53.1388
10.6009	-50.5097	-53.1286
10.6426	-51.2029	-53.8115
10.6842	-51.7941	-54.4028
10.7259	-52.3242	-54.9838
10.7676	-52.9052	-55.5445
10.8092	-53.3639	-56.0032
10.8509	-53.9755	-56.6046
10.8926	-54.5872	-57.2366
10.9342	-55.1784	-57.838
10.9759	-55.739	-58.3987
11.0176	-56.2793	-58.9593
11.0662	-57.1356	-59.785
11.1078	-57.7166	-60.3967
11.1495	-58.42	-61.0694
11.1912	-58.9399	-61.6913
11.2328	-59.6228	-62.3538
11.2745	-60.2956	-63.0572
11.3162	-60.9582	-63.6484
11.3578	-61.631	-64.3722
11.3995	-62.3344	-65.0348
11.4412	-62.9766	-65.728
11.4828	-63.7207	-66.4619
11.5245	-64.2813	-67.0633
11.5662	-64.9541	-67.7769
11.6078	-65.7085	-68.4802
11.6495	-66.3914	-69.1123
11.6912	-66.9521	-69.8156
11.7328	-67.5535	-70.3355
11.7814	-68.3282	-71.1
11.8231	-69.0826	-71.8442
11.8648	-69.8471	-72.7616
11.9134	-70.6626	-73.4853
11.9551	-71.4271	-74.3212
11.9967	-72.1509	-74.9532
12.0384	-72.8746	-75.7076
12.0801	-73.527	-76.4313
12.1287	-74.2813	-77.1245
12.1703	-75.0255	-77.9094
12.212	-75.8919	-78.7657
12.2537	-76.5545	-79.5914
12.2953	-77.5943	-80.5496
12.337	-78.5219	-81.4874
12.3787	-79.5107	-82.4762
12.4203	-80.367	-83.363
12.462	-81.3252	-84.3416
12.5037	-82.2528	-85.3202
12.5453	-83.3129	-86.3294
12.587	-84.3221	-87.4405
12.6287	-85.4128	-88.5618
12.6703	-86.5036	-89.7443
12.712	-87.5229	-90.7534
12.7606	-88.8583	-92.0582
12.8023	-89.7859	-93.0062
12.8439	-90.8053	-94.0562
12.8856	-91.9164	-95.2285
12.9273	-93.0683	-96.5027
12.9689	-94.3527	-97.6749
13.0106	-95.5046	-98.9186
13.0523	-96.7074	-100.193
13.0939	-98.0632	-101.722
13.1356	-99.2355	-102.762
13.1773	-100.387	-104.179
13.2189	-101.743	-105.361
13.2606	-103.129	-106.717
13.3023	-104.475	-108.266
13.3439	-105.607	-109.52
13.3856	-107.217	-111.018
13.4273	-108.542	-112.384
13.4689	-109.99	-113.863
13.5106	-111.335	-115.3
13.5523	-112.722	-116.788
13.5939	-114.077	-118.266
13.6356	-115.617	-119.805
13.6773	-116.789	-121.069
13.7259	-118.471	-122.833
13.7676	-119.857	-124.158
13.8092	-121.152	-125.718
13.8509	-122.477	-126.961
13.8926	-123.598	-128.246
13.9342	-124.985	-129.887
13.9759	-126.616	-131.508
14.0176	-128.022	-132.955
14.0592	-129.317	-134.545
14.1078	-130.979	-136.401
14.1495	-132.446	-137.889
14.1912	-133.843	-139.204
14.2398	-135.515	-141.08
14.2814	-136.922	-142.486
14.3231	-138.206	-143.924
14.3648	-139.48	-145.453
14.4134	-141.254	-147.4
14.4551	-142.844	-149.102
14.5106	-144.811	-151.365
14.5523	-146.188	-153.016
14.6078	-148.084	-155.177
14.6495	-149.572	-156.768
14.6912	-150.897	-158.327
14.7328	-152.049	-159.693
14.7745	-152.987	-160.866
14.8231	-154.23	-162.609
14.8648	-155.474	-163.781
14.9064	-156.677	-165.208
14.9481	-157.859	-166.574
14.9967	-159.205	-168.113
15.0453	-160.377	-169.928
15.087	-161.6	-171.222
15.1287	-162.671	-172.517
15.1703	-163.527	-173.791
15.212	-164.597	-175.167
15.2606	-165.627	-176.543
15.3023	-166.534	-177.706
15.3439	-167.421	-178.857
15.3856	-168.247	-179.999
15.4273	-169.052	-181.171
15.4689	-169.898	-182.282
15.5106	-170.693	-183.445
15.5523	-171.56	-184.505
15.6009	-172.589	-185.82
15.6426	-173.323	-186.921
15.6842	-173.925	-187.736
15.7259	-174.434	-188.817
15.7745	-175.556	-190.101
15.8231	-176.514	-191.538
15.8648	-175.168	-187.971
15.9064	-178.155	-193.944
15.9481	-179.011	-195.402
15.9898	-179.796	-196.839
16.0384	-180.693	-198.419
16.0801	-181.366	-199.897
16.1217	-182.202	-201.273
16.1634	-182.752	-202.537
16.2051	-183.537	-204.056
16.2467	-184.281	-205.402
16.2884	-184.954	-206.594
16.3301	-185.556	-207.797
16.3717	-186.106	-208.929
16.4134	-186.738	-210.142
16.4551	-187.604	-211.569
16.4967	-188.155	-212.792
16.5453	-188.95	-214.27
16.587	-189.541	-215.585
16.6287	-190.122	-216.921
16.6773	-190.907	-218.541
16.7189	-191.6	-219.928
16.7606	-191.927	-221.008
16.8023	-192.824	-222.619
16.8439	-193.496	-224.097
16.8856	-194.067	-225.473
16.9273	-194.689	-227.124
16.9689	-195.087	-228.378
17.0106	-195.637	-230.009
17.0523	-196.453	-231.722
17.0939	-197.166	-233.516
17.1426	-197.92	-235.769
17.1842	-198.42	-237.522
17.2259	-199.123	-239.408
17.2676	-199.715	-241.131
17.3092	-200.234	-242.741
17.3509	-200.836	-244.535
17.3926	-201.386	-246.299
17.4342	-201.896	-247.909
17.4759	-202.436	-249.744
17.5176	-203.017	-251.549
17.5592	-203.568	-253.383
17.6009	-204.088	-255.29
17.6426	-204.801	-257.206
17.6842	-205.372	-258.99
17.7259	-204.618	-259.286
17.7676	-206.789	-263.414
17.8092	-207.441	-265.381
17.8509	-208.104	-267.787
17.8926	-208.665	-270.009
17.9342	-209.409	-272.13
17.9759	-209.929	-274.117
18.0245	-210.734	-276.829
18.0662	-211.131	-279.235
18.1078	-211.692	-280.682
18.1495	-212.375	-283.852
18.1912	-212.732	-285.789
18.2328	-213.598	-288.694
18.2745	-214.057	-290.702
18.3162	-214.811	-293.118
18.3717	-215.443	-296.503
18.4134	-215.79	-298.929
18.4551	-216.667	-301.712
18.4967	-217.248	-303.699
18.5384	-218.012	-306.666
18.5801	-218.685	-309.255
18.6217	-219.246	-311.763
18.6634	-219.929	-314.841
18.7051	-220.449	-317.655
18.7467	-221.295	-320.539
18.7884	-221.998	-323.353
18.837	-222.926	-327.002
18.8787	-223.731	-329.673
18.9203	-224.343	-332.537
18.9689	-224.373	-336.197
19.0106	-225.617	-339
19.0523	-226.453	-341.977
19.0939	-227.248	-345.473
19.1356	-228.033	-348.123
19.1773	-228.654	-351.09
19.2189	-229.501	-354.8
19.2606	-230.112	-358.001
19.3023	-230.805	-361.222
19.3439	-231.529	-364.515
19.3856	-232.61	-368.338
19.4273	-233.068	-372.191
19.4759	-234.434	-376.656
19.5245	-235.708	-381.365
19.5731	-236.738	-385.657
19.6217	-237.808	-390.152
19.6703	-234.954	-387.349
19.7189	-238.869	-398.225
19.7676	-240.01	-403.159
19.8162	-241.448	-409.418
19.8648	-242.538	-413.689
19.9134	-243.394	-419.112
19.962	-244.862	-425.453
20.0106	-245.209	-430.366
20.0592	-246.565	-435.208
20.1078	-247.798	-441.202
20.1564	-248.461	-445.616
20.2051	-249.847	-449.979
20.2537	-251.091	-459.153
20.3023	-252.385	-466.085
20.3509	-253.833	-472.894
20.3995	-255.036	-479.826
20.4481	-256.555	-487.135
20.4967	-257.961	-495.32
20.5453	-259.562	-503.353
20.5939	-261.091	-511.253
20.6426	-262.65	-516.972
20.6981	-263.853	-525.544
20.7467	-265.117	-532.935
20.7953	-266.667	-540.05
20.8439	-268.532	-552.751
20.8926	-270.836	-562.527
20.9412	-272.324	-570.254
20.9967	-273.996	-580.397
21.0453	-275.138	-588.643
21.0939	-276.758	-598.541
21.1426	-278.481	-609.754
21.1912	-280.826	-622.068
21.2398	-282.355	-632.558
21.2884	-284.577	-639.979
21.337	-286.687	-649.795
21.3856	-288.593	-659.041
21.4342	-290.02	-670.743
21.4828	-292.202	-678.205
21.5314	-293.721	-689.571
21.5801	-295.831	-695.901
21.6287	-297.727	-706.686
21.6773	-300.183	-718.429
21.7328	-302.497	-729.51
21.7814	-305.066	-740.723
21.8301	-307.248	-753.424
21.8787	-309.052	-765.218
21.9273	-311.284	-776.605
21.9828	-313.323	-791.365
22.0384	-316.024	-808.215
22.087	-318.359	-823.394
22.1356	-322.283	-841.712
22.1842	-325.219	-856.187
22.2328	-328.41	-869.224
22.2884	-331.651	-889.724
22.337	-334.557	-892.914
22.3787	-337.013	-914.036
22.4412	-340.856
22.4898	-344.016
22.5384	-347.034
22.587	-350.051
22.6356	-353.456
22.6842	-356.667
22.7398	-359.46
22.7884	-363.69
22.837	-367.492
22.8856	-369.908
22.9342	-374.271
22.9828	-378.175
23.0384	-382.936
23.087	-387.288
23.1356	-392.181
23.1842	-396.738
23.2328	-400.071
23.2884	-405.515
23.337	-410.163
23.3856	-414.924
23.4342	-419.653
23.4828	-424.465
23.5314	-429.235
23.5801	-434.659
23.6287	-439.643
23.6773	-444.791
23.7259	-450.336
23.7745	-454.975
23.8231	-459.103
23.8717	-466.106
23.9203	-472.701
23.9689	-478.114
24.0176	-483.282
24.0662	-490.683
24.1148	-498.93
24.1634	-506.891
24.212	-515.719
24.2606	-523.405
24.3092	-531.723
24.3578	-538.94
24.4064	-546.239
24.4551	-554.465
24.5037	-562.018
24.5523	-570.204
24.6009	-579.195
24.6495	-587.176
24.6981	-596.983
24.7467	-607.961
24.7953	-617.666
24.8439	-626.463
24.8926	-636.361
24.9412	-645.637
24.9898	-657.543
25.0384	-670.714
25.087	-682.416
25.1356	-696.024
25.1842	-708.583
25.2328	-721.233
25.2814	-733.507
25.3301	-747.472
25.3787	-756.86
25.4273	-774.159
25.4759	-783.823
25.5245	-797.961
25.5731	-811.713
25.6217	-830.958
25.6703	-843.976
25.7189	-861.244
25.7676	-883.323
25.8162	-901.233
25.8717	-921.376
25.9203	-937.085
25.9689	-954.424
26.0176	-971.845
26.0662	-991.713
26.1217	-1023.23
26.1703	-1052.22
26.2189	-1075.92
26.2676	-1097.17
26.3162	-1123.75
26.3648	-1147.83
26.4134	-1171.33
26.462	-1189.31
26.5106	-1213.97
26.5592	-1244.66
26.6078	-1279.91
26.6564	-1303.36
26.7051	-1328.19
26.7537	-1361.31
26.8023	-1393.18
26.8509	-1429.88
26.8995	-1459.44
26.9481	-1495.32
26.9967	-1537.44
27.0453	-1565.26
27.0592	-1578.98

## Sheet: HYDRUS
Data für die Zielfunktion: 2 x Tensionen, 1 x Endwassergehalt					31.0731	Verdunstungsrate
Time	Obs	Type	Pos	Weight		Zeitintervall		Evarate [cm/d]			Type	1-Tension	2-Wassergehalt
0.0106073	-1.83486	1	2	1		0.651581	0	0.210337			Pos	1-top	2-bot	(von oben nach unten)
0.0244962	-1.67176	1	2	1		1.181	0	0.238554			77	Time-Variable boundary conditions+
0.0661628	-2.19164	1	2	1		1.69511	0	0.201872			31.091	Final Time	Time Information
0.107829	-2.14067	1	2	1		1.86554	0	0.203381			1213	Number of Data Points in Objective Function
0.149496	-2.51784	1	2	1		2.16864	0	0.30692		Interpolated Values	-5.19535	BC-top	[hPa]
0.205052	-3.09888	1	2	1		2.63371	0	0.237294			-3.94535	MP_top_ini	[hPa]	1
0.267552	-3.73089	1	2	1		2.96949	0	0.220099			-0.940528	MP_bot_ini	[hPa]	2
0.309218	-3.69011	1	2	1		3.22308	0	0.23094			0.309472	BC-bot	[hPa]
0.350885	-4.12844	1	2	1		3.76337	0	0.168494
0.392552	-4.52599	1	2	1		4.18663	0	0.203788
0.434218	-5.09684	1	2	1		4.699	0	0.179232
0.475885	-5.47401	1	2	1		4.89944	0	0.207707		Real Values	-5.32	BC-top	[hPa]
0.517552	-5.84098	1	2	1		5.20281	0	0.266598			-4.07	MP_top_ini	[hPa]
0.559218	-6.19776	1	2	1		5.64779	0	0.184886			-1.57	MP_bot_ini	[hPa]
0.600885	-6.53415	1	2	1		5.87229	0	0.174804			-0.32	BC-bot	[hPa]
0.642552	-6.80938	1	2	1		6.10043	0	0.259331
0.684218	-6.90112	1	2	1		6.67913	0	0.186914
0.725885	-7.2579	1	2	1		6.88779	0	0.163251
0.781441	-7.14577	1	2	1		7.15512	0	0.16319				-1.57	-4.07
0.830052	-7.47197	1	2	1		7.6899	0	0.141546
0.871718	-7.84913	1	2	1		8.16504	0	0.158898
0.913385	-8.26707	1	2	1		8.73699	0	0.186682
0.955052	-8.48114	1	2	1		8.89223	0	0.189912
0.996718	-7.78797	1	2	1		9.10969	0	0.245508
1.03839	-8.7156	1	2	1		9.72925	0	0.223459
1.08005	-8.99083	1	2	1		10.0798	0	0.228431
1.12172	-9.39857	1	2	1		10.5617	0	0.223659
1.16339	-9.57187	1	2	1		11.1882	0	0.228591
1.20505	-9.1947	1	2	1		11.7042	0	0.220813
1.24672	-9.50051	1	2	1		11.8711	0	0.193364
1.28839	-9.89806	1	2	1		12.0874	0	0.191592
1.33005	-10.051	1	2	1		12.6762	0	0.199945
1.37172	-10.265	1	2	1		12.8762	0	0.207179
1.42727	-10.3364	1	2	1		13.1736	0	0.218389
1.46894	-10.5505	1	2	1		13.6674	0	0.205727
1.51755	-10.4587	1	2	1		13.8596	0	0.197981
1.55922	-10.7951	1	2	1		14.0874	0	0.207223
1.60089	-10.8155	1	2	1		14.1025	0	0.223957
1.64255	-11.0703	1	2	1		14.81	0	0.208064
1.68422	-11.2436	1	2	1		15.0269	0	0.205729
1.72589	-11.3558	1	2	1		15.1413	0	0.219451
1.76755	-11.5189	1	2	1		15.712	0	0.196859
1.80922	-11.7227	1	2	1		15.8647	0	0.19701
1.85089	-11.7941	1	2	1		16.1453	0	0.226443
1.8995	-12.1713	1	2	1		16.7296	0	0.195349
1.94116	-12.4363	1	2	1		16.9739	0	0.173715
1.98283	-12.5688	1	2	1		17.1459	0	0.182988
2.0245	-12.844	1	2	1		17.7232	0	0.143885
2.06616	-13.1295	1	2	1		18.1665	0	0.131678
2.10783	-13.4047	1	2	1		18.6812	0	0.117261
2.1495	-13.4862	1	2	1		18.9786	0	0.105816
2.19116	-13.8022	1	2	1		19.2618	0	0.104826
2.23283	-14.0163	1	2	1		19.6576	0	0.104676
2.2745	-14.1998	1	2	1		20.1312	0	0.104322
2.31616	-14.475	1	2	1		20.6694	0	0.101782
2.35783	-14.526	1	2	1		21.1942	0	0.0948927
2.3995	-14.7299	1	2	1		21.6948	0	0.0791892
2.44116	-14.8012	1	2	1		21.9497	0	0.0797063
2.48977	-14.9847	1	2	1		22.0694	0	0.0865655
2.53144	-15.158	1	2	1		22.7082	0	0.0717258
2.57311	-15.2701	1	2	1		22.8801	0	0.0695005
2.61477	-15.3619	1	2	1		23.0887	0	0.0697291
2.65644	-15.3517	1	2	1		23.7942	0	0.0649416
2.69811	-14.6279	1	2	1		24.1273	0	0.0687646
2.73977	-15.1478	1	2	1		24.8021	0	0.0608181
2.78144	-15.4842	1	2	1		25.2605	0	0.0634413
2.82311	-15.5657	1	2	1		25.6862	0	0.0603671
2.86477	-15.8104	1	2	1		26.069	0	0.0593198
2.90644	-15.9021	1	2	1		26.6628	0	0.0556858
2.94811	-16.208	1	2	1		27.0358	0	0.0523448
2.98977	-16.4118	1	2	1		27.7034	0	0.0471407
3.03144	-16.5647	1	2	1		28.6329	0	0.0426487
3.07311	-16.7482	1	2	1		29.0646	0	0.0392232
3.11477	-16.789	1	2	1		29.7352	0	0.0395106
3.15644	-16.8909	1	2	1		30.1643	0	0.0403894
3.20505	-16.9827	1	2	1		30.7104	0	0.0364776
3.24672	-16.9317	1	2	1		31.091	0	0.0314934
3.28839	-17.0744	1	2	1
3.337	-17.156	1	2	1
3.37866	-17.2885	1	2	1
3.42033	-17.3191	1	2	1
3.462	-17.4414	1	2	1
3.50366	-17.5535	1	2	1
3.54533	-17.6147	1	2	1
3.587	-17.7574	1	2	1
3.62866	-17.8899	1	2	1
3.67033	-17.9817	1	2	1
3.712	-18.1346	1	2	1
3.75366	-18.2263	1	2	1
3.79533	-18.2467	1	2	1
3.837	-18.42	1	2	1
3.88561	-18.5423	1	2	1
3.92727	-18.7156	1	2	1
3.96894	-18.8685	1	2	1
4.01061	-18.9195	1	2	1
4.05227	-19.1539	1	2	1
4.09394	-19.3476	1	2	1
4.13561	-19.5311	1	2	1
4.17727	-19.6738	1	2	1
4.21894	-19.7248	1	2	1
4.26061	-19.8267	1	2	1
4.30227	-19.9185	1	2	1
4.34394	-19.9898	1	2	1
4.38561	-20.1529	1	2	1
4.42727	-20.1835	1	2	1
4.46894	-20.2956	1	2	1
4.51061	-20.4383	1	2	1
4.55227	-20.5607	1	2	1
4.59394	-20.6728	1	2	1
4.63561	-20.7238	1	2	1
4.67727	-20.8563	1	2	1
4.71894	-20.9582	1	2	1
4.76061	-21.1417	1	2	1
4.80227	-21.315	1	2	1
4.84394	-21.4883	1	2	1
4.88561	-21.5698	1	2	1
4.92727	-21.6922	1	2	1
4.96894	-21.9164	1	2	1
5.0245	-22.2324	1	2	1
5.06616	-22.4771	1	2	1
5.10783	-22.7319	1	2	1
5.1495	-22.9154	1	2	1
5.19116	-23.0683	1	2	1
5.23283	-23.1397	1	2	1
5.2745	-23.3129	1	2	1
5.31616	-23.4251	1	2	1
5.35783	-23.5066	1	2	1
5.3995	-23.5678	1	2	1
5.44116	-23.7003	1	2	1
5.48283	-23.7819	1	2	1
5.5245	-23.8634	1	2	1
5.56616	-23.9348	1	2	1
5.60783	-23.9857	1	2	1
5.6495	-23.9042	1	2	1
5.69116	-24.1998	1	2	1
5.73283	-24.3119	1	2	1
5.7745	-24.4343	1	2	1
5.81616	-24.5872	1	2	1
5.85783	-24.7197	1	2	1
5.90644	-24.6687	1	2	1
5.94811	-25.0153	1	2	1
5.98977	-25.3211	1	2	1
6.03144	-25.5861	1	2	1
6.07311	-25.841	1	2	1
6.11477	-26.0754	1	2	1
6.15644	-26.2487	1	2	1
6.19811	-26.371	1	2	1
6.23977	-26.5341	1	2	1
6.28144	-26.6565	1	2	1
6.32311	-26.7176	1	2	1
6.36477	-26.7992	1	2	1
6.40644	-26.8909	1	2	1
6.44811	-27.0031	1	2	1
6.48977	-27.105	1	2	1
6.53144	-27.2171	1	2	1
6.57311	-27.3394	1	2	1
6.61477	-27.3802	1	2	1
6.65644	-27.5637	1	2	1
6.69811	-27.6656	1	2	1
6.73977	-27.7778	1	2	1
6.78144	-27.9409	1	2	1
6.82311	-28.0632	1	2	1
6.86477	-28.1753	1	2	1
6.90644	-28.2467	1	2	1
6.94811	-28.42	1	2	1
6.99672	-28.5321	1	2	1
7.03839	-28.6748	1	2	1
7.08005	-28.8073	1	2	1
7.12172	-28.8889	1	2	1
7.16339	-29.052	1	2	1
7.20505	-29.1233	1	2	1
7.24672	-29.2253	1	2	1
7.28839	-29.3578	1	2	1
7.33005	-29.4903	1	2	1
7.37172	-29.6024	1	2	1
7.41339	-29.684	1	2	1
7.45505	-29.8165	1	2	1
7.49672	-29.8777	1	2	1
7.53839	-30.0102	1	2	1
7.58005	-30.1325	1	2	1
7.62172	-30.2548	1	2	1
7.66339	-30.3568	1	2	1
7.70505	-30.2956	1	2	1
7.74672	-30.5199	1	2	1
7.78839	-30.6524	1	2	1
7.83005	-30.897	1	2	1
7.87172	-31.0703	1	2	1
7.91339	-31.2436	1	2	1
7.95505	-31.4067	1	2	1
7.99672	-31.5698	1	2	1
8.03839	-31.7125	1	2	1
8.08005	-31.8654	1	2	1
8.12172	-32.0999	1	2	1
8.16339	-32.3038	1	2	1
8.20505	-32.3344	1	2	1
8.24672	-32.63	1	2	1
8.28839	-32.8338	1	2	1
8.33005	-33.0071	1	2	1
8.37172	-33.211	1	2	1
8.41339	-33.4149	1	2	1
8.45505	-33.5984	1	2	1
8.49672	-33.8022	1	2	1
8.53839	-34.0367	1	2	1
8.58005	-34.2915	1	2	1
8.62866	-34.5362	1	2	1
8.67033	-34.6687	1	2	1
8.712	-34.8828	1	2	1
8.75366	-35.1682	1	2	1
8.79533	-35.4638	1	2	1
8.837	-35.6779	1	2	1
8.87866	-35.9735	1	2	1
8.92033	-36.2283	1	2	1
8.962	-36.5851	1	2	1
9.00366	-36.9215	1	2	1
9.04533	-37.3089	1	2	1
9.087	-37.7064	1	2	1
9.12866	-37.6758	1	2	1
9.17033	-38.1651	1	2	1
9.212	-38.4709	1	2	1
9.25366	-38.7666	1	2	1
9.29533	-39.0928	1	2	1
9.337	-39.2762	1	2	1
9.37866	-39.5821	1	2	1
9.42033	-39.8777	1	2	1
9.462	-40.2039	1	2	1
9.50366	-40.4995	1	2	1
9.54533	-40.8563	1	2	1
9.587	-41.1825	1	2	1
9.62866	-41.4781	1	2	1
9.67033	-41.7839	1	2	1
9.712	-42.1713	1	2	1
9.75366	-42.4465	1	2	1
9.79533	-42.8033	1	2	1
9.84394	-43.2926	1	2	1
9.88561	-43.6595	1	2	1
9.92727	-43.9348	1	2	1
9.96894	-44.4037	1	2	1
10.0176	-44.8828	1	2	1
10.0592	-45.3619	1	2	1
10.1009	-45.6779	1	2	1
10.1426	-46.1468	1	2	1
10.1842	-46.5647	1	2	1
10.2259	-46.9011	1	2	1
10.2676	-47.2681	1	2	1
10.3092	-47.6453	1	2	1
10.3509	-48.0224	1	2	1
10.3926	-48.4506	1	2	1
10.4342	-48.8787	1	2	1
10.4759	-49.419	1	2	1
10.5176	-49.9185	1	2	1
10.5592	-50.5097	1	2	1
10.6009	-50.5097	1	2	1
10.6426	-51.2029	1	2	1
10.6842	-51.7941	1	2	1
10.7259	-52.3242	1	2	1
10.7676	-52.9052	1	2	1
10.8092	-53.3639	1	2	1
10.8509	-53.9755	1	2	1
10.8926	-54.5872	1	2	1
10.9342	-55.1784	1	2	1
10.9759	-55.739	1	2	1
11.0176	-56.2793	1	2	1
11.0662	-57.1356	1	2	1
11.1078	-57.7166	1	2	1
11.1495	-58.42	1	2	1
11.1912	-58.9399	1	2	1
11.2328	-59.6228	1	2	1
11.2745	-60.2956	1	2	1
11.3162	-60.9582	1	2	1
11.3578	-61.631	1	2	1
11.3995	-62.3344	1	2	1
11.4412	-62.9766	1	2	1
11.4828	-63.7207	1	2	1
11.5245	-64.2813	1	2	1
11.5662	-64.9541	1	2	1
11.6078	-65.7085	1	2	1
11.6495	-66.3914	1	2	1
11.6912	-66.9521	1	2	1
11.7328	-67.5535	1	2	1
11.7814	-68.3282	1	2	1
11.8231	-69.0826	1	2	1
11.8648	-69.8471	1	2	1
11.9134	-70.6626	1	2	1
11.9551	-71.4271	1	2	1
11.9967	-72.1509	1	2	1
12.0384	-72.8746	1	2	1
12.0801	-73.527	1	2	1
12.1287	-74.2813	1	2	1
12.1703	-75.0255	1	2	1
12.212	-75.8919	1	2	1
12.2537	-76.5545	1	2	1
12.2953	-77.5943	1	2	1
12.337	-78.5219	1	2	1
12.3787	-79.5107	1	2	1
12.4203	-80.367	1	2	1
12.462	-81.3252	1	2	1
12.5037	-82.2528	1	2	1
12.5453	-83.3129	1	2	1
12.587	-84.3221	1	2	1
12.6287	-85.4128	1	2	1
12.6703	-86.5036	1	2	1
12.712	-87.5229	1	2	1
12.7606	-88.8583	1	2	1
12.8023	-89.7859	1	2	1
12.8439	-90.8053	1	2	1
12.8856	-91.9164	1	2	1
12.9273	-93.0683	1	2	1
12.9689	-94.3527	1	2	1
13.0106	-95.5046	1	2	1
13.0523	-96.7074	1	2	1
13.0939	-98.0632	1	2	1
13.1356	-99.2355	1	2	1
13.1773	-100.387	1	2	1
13.2189	-101.743	1	2	1
13.2606	-103.129	1	2	1
13.3023	-104.475	1	2	1
13.3439	-105.607	1	2	1
13.3856	-107.217	1	2	1
13.4273	-108.542	1	2	1
13.4689	-109.99	1	2	1
13.5106	-111.335	1	2	1
13.5523	-112.722	1	2	1
13.5939	-114.077	1	2	1
13.6356	-115.617	1	2	1
13.6773	-116.789	1	2	1
13.7259	-118.471	1	2	1
13.7676	-119.857	1	2	1
13.8092	-121.152	1	2	1
13.8509	-122.477	1	2	1
13.8926	-123.598	1	2	1
13.9342	-124.985	1	2	1
13.9759	-126.616	1	2	1
14.0176	-128.022	1	2	1
14.0592	-129.317	1	2	1
14.1078	-130.979	1	2	1
14.1495	-132.446	1	2	1
14.1912	-133.843	1	2	1
14.2398	-135.515	1	2	1
14.2814	-136.922	1	2	1
14.3231	-138.206	1	2	1
14.3648	-139.48	1	2	1
14.4134	-141.254	1	2	1
14.4551	-142.844	1	2	1
14.5106	-144.811	1	2	1
14.5523	-146.188	1	2	1
14.6078	-148.084	1	2	1
14.6495	-149.572	1	2	1
14.6912	-150.897	1	2	1
14.7328	-152.049	1	2	1
14.7745	-152.987	1	2	1
14.8231	-154.23	1	2	1
14.8648	-155.474	1	2	1
14.9064	-156.677	1	2	1
14.9481	-157.859	1	2	1
14.9967	-159.205	1	2	1
15.0453	-160.377	1	2	1
15.087	-161.6	1	2	1
15.1287	-162.671	1	2	1
15.1703	-163.527	1	2	1
15.212	-164.597	1	2	1
15.2606	-165.627	1	2	1
15.3023	-166.534	1	2	1
15.3439	-167.421	1	2	1
15.3856	-168.247	1	2	1
15.4273	-169.052	1	2	1
15.4689	-169.898	1	2	1
15.5106	-170.693	1	2	1
15.5523	-171.56	1	2	1
15.6009	-172.589	1	2	1
15.6426	-173.323	1	2	1
15.6842	-173.925	1	2	1
15.7259	-174.434	1	2	1
15.7745	-175.556	1	2	1
15.8231	-176.514	1	2	1
15.8648	-175.168	1	2	1
15.9064	-178.155	1	2	1
15.9481	-179.011	1	2	1
15.9898	-179.796	1	2	1
16.0384	-180.693	1	2	1
16.0801	-181.366	1	2	1
16.1217	-182.202	1	2	1
16.1634	-182.752	1	2	1
16.2051	-183.537	1	2	1
16.2467	-184.281	1	2	1
16.2884	-184.954	1	2	1
16.3301	-185.556	1	2	1
16.3717	-186.106	1	2	1
16.4134	-186.738	1	2	1
16.4551	-187.604	1	2	1
16.4967	-188.155	1	2	1
16.5453	-188.95	1	2	1
16.587	-189.541	1	2	1
16.6287	-190.122	1	2	1
16.6773	-190.907	1	2	1
16.7189	-191.6	1	2	1
16.7606	-191.927	1	2	1
16.8023	-192.824	1	2	1
16.8439	-193.496	1	2	1
16.8856	-194.067	1	2	1
16.9273	-194.689	1	2	1
16.9689	-195.087	1	2	1
17.0106	-195.637	1	2	1
17.0523	-196.453	1	2	1
17.0939	-197.166	1	2	1
17.1426	-197.92	1	2	1
17.1842	-198.42	1	2	1
17.2259	-199.123	1	2	1
17.2676	-199.715	1	2	1
17.3092	-200.234	1	2	1
17.3509	-200.836	1	2	1
17.3926	-201.386	1	2	1
17.4342	-201.896	1	2	1
17.4759	-202.436	1	2	1
17.5176	-203.017	1	2	1
17.5592	-203.568	1	2	1
17.6009	-204.088	1	2	1
17.6426	-204.801	1	2	1
17.6842	-205.372	1	2	1
17.7259	-204.618	1	2	1
17.7676	-206.789	1	2	1
17.8092	-207.441	1	2	1
17.8509	-208.104	1	2	1
17.8926	-208.665	1	2	1
17.9342	-209.409	1	2	1
17.9759	-209.929	1	2	1
18.0245	-210.734	1	2	1
18.0662	-211.131	1	2	1
18.1078	-211.692	1	2	1
18.1495	-212.375	1	2	1
18.1912	-212.732	1	2	1
18.2328	-213.598	1	2	1
18.2745	-214.057	1	2	1
18.3162	-214.811	1	2	1
18.3717	-215.443	1	2	1
18.4134	-215.79	1	2	1
18.4551	-216.667	1	2	1
18.4967	-217.248	1	2	1
18.5384	-218.012	1	2	1
18.5801	-218.685	1	2	1
18.6217	-219.246	1	2	1
18.6634	-219.929	1	2	1
18.7051	-220.449	1	2	1
18.7467	-221.295	1	2	1
18.7884	-221.998	1	2	1
18.837	-222.926	1	2	1
18.8787	-223.731	1	2	1
18.9203	-224.343	1	2	1
18.9689	-224.373	1	2	1
19.0106	-225.617	1	2	1
19.0523	-226.453	1	2	1
19.0939	-227.248	1	2	1
19.1356	-228.033	1	2	1
19.1773	-228.654	1	2	1
19.2189	-229.501	1	2	1
19.2606	-230.112	1	2	1
19.3023	-230.805	1	2	1
19.3439	-231.529	1	2	1
19.3856	-232.61	1	2	1
19.4273	-233.068	1	2	1
19.4759	-234.434	1	2	1
19.5245	-235.708	1	2	1
19.5731	-236.738	1	2	1
19.6217	-237.808	1	2	1
19.6703	-234.954	1	2	1
19.7189	-238.869	1	2	1
19.7676	-240.01	1	2	1
19.8162	-241.448	1	2	1
19.8648	-242.538	1	2	1
19.9134	-243.394	1	2	1
19.962	-244.862	1	2	1
20.0106	-245.209	1	2	1
20.0592	-246.565	1	2	1
20.1078	-247.798	1	2	1
20.1564	-248.461	1	2	1
20.2051	-249.847	1	2	1
20.2537	-251.091	1	2	1
20.3023	-252.385	1	2	1
20.3509	-253.833	1	2	1
20.3995	-255.036	1	2	1
20.4481	-256.555	1	2	1
20.4967	-257.961	1	2	1
20.5453	-259.562	1	2	1
20.5939	-261.091	1	2	1
20.6426	-262.65	1	2	1
20.6981	-263.853	1	2	1
20.7467	-265.117	1	2	1
20.7953	-266.667	1	2	1
20.8439	-268.532	1	2	1
20.8926	-270.836	1	2	1
20.9412	-272.324	1	2	1
20.9967	-273.996	1	2	1
21.0453	-275.138	1	2	1
21.0939	-276.758	1	2	1
21.1426	-278.481	1	2	1
21.1912	-280.826	1	2	1
21.2398	-282.355	1	2	1
21.2884	-284.577	1	2	1
21.337	-286.687	1	2	1
21.3856	-288.593	1	2	1
21.4342	-290.02	1	2	1
21.4828	-292.202	1	2	1
21.5314	-293.721	1	2	1
21.5801	-295.831	1	2	1
21.6287	-297.727	1	2	1
21.6773	-300.183	1	2	1
21.7328	-302.497	1	2	1
21.7814	-305.066	1	2	1
21.8301	-307.248	1	2	1
21.8787	-309.052	1	2	1
21.9273	-311.284	1	2	1
21.9828	-313.323	1	2	1
22.0384	-316.024	1	2	1
22.087	-318.359	1	2	1
22.1356	-322.283	1	2	1
22.1842	-325.219	1	2	1
22.2328	-328.41	1	2	1
22.2884	-331.651	1	2	1
22.337	-334.557	1	2	1
22.3787	-337.013	1	2	1
22.4412	-340.856	1	2	1
22.4898	-344.016	1	2	1
22.5384	-347.034	1	2	1
22.587	-350.051	1	2	1
22.6356	-353.456	1	2	1
22.6842	-356.667	1	2	1
22.7398	-359.46	1	2	1
22.7884	-363.69	1	2	1
22.837	-367.492	1	2	1
22.8856	-369.908	1	2	1
22.9342	-374.271	1	2	1
22.9828	-378.175	1	2	1
23.0384	-382.936	1	2	1
23.087	-387.288	1	2	1
23.1356	-392.181	1	2	1
23.1842	-396.738	1	2	1
23.2328	-400.071	1	2	1
23.2884	-405.515	1	2	1
23.337	-410.163	1	2	1
23.3856	-414.924	1	2	1
23.4342	-419.653	1	2	1
23.4828	-424.465	1	2	1
23.5314	-429.235	1	2	1
23.5801	-434.659	1	2	1
23.6287	-439.643	1	2	1
23.6773	-444.791	1	2	1
23.7259	-450.336	1	2	1
23.7745	-454.975	1	2	1
23.8231	-459.103	1	2	1
23.8717	-466.106	1	2	1
23.9203	-472.701	1	2	1
23.9689	-478.114	1	2	1
24.0176	-483.282	1	2	1
24.0662	-490.683	1	2	1
24.1148	-498.93	1	2	1
24.1634	-506.891	1	2	1
24.212	-515.719	1	2	1
24.2606	-523.405	1	2	1
24.3092	-531.723	1	2	1
24.3578	-538.94	1	2	1
24.4064	-546.239	1	2	1
24.4551	-554.465	1	2	1
24.5037	-562.018	1	2	1
24.5523	-570.204	1	2	1
24.6009	-579.195	1	2	1
24.6495	-587.176	1	2	1
24.6981	-596.983	1	2	1
24.7467	-607.961	1	2	1
24.7953	-617.666	1	2	1
24.8439	-626.463	1	2	1
24.8926	-636.361	1	2	1
24.9412	-645.637	1	2	1
24.9898	-657.543	1	2	1
25.0384	-670.714	1	2	1
25.087	-682.416	1	2	1
25.1356	-696.024	1	2	1
25.1842	-708.583	1	2	1
25.2328	-721.233	1	2	1
25.2814	-733.507	1	2	1
25.3301	-747.472	1	2	1
25.3787	-756.86	1	2	1
25.4273	-774.159	1	2	1
25.4759	-783.823	1	2	1
25.5245	-797.961	1	2	1
25.5731	-811.713	1	2	1
25.6217	-830.958	1	2	1
25.6703	-843.976	1	2	1
25.7189	-861.244	1	2	1
25.7676	-883.323	1	2	1
25.8162	-901.233	1	2	1
25.8717	-921.376	1	2	1
25.9203	-937.085	1	2	1
25.9689	-954.424	1	2	1
26.0176	-971.845	1	2	1
26.0662	-991.713	1	2	1
26.1217	-1023.23	1	2	1
26.1703	-1052.22	1	2	1
26.2189	-1075.92	1	2	1
26.2676	-1097.17	1	2	1
26.3162	-1123.75	1	2	1
26.3648	-1147.83	1	2	1
26.4134	-1171.33	1	2	1
26.462	-1189.31	1	2	1
26.5106	-1213.97	1	2	1
26.5592	-1244.66	1	2	1
26.6078	-1279.91	1	2	1
26.6564	-1303.36	1	2	1
26.7051	-1328.19	1	2	1
26.7537	-1361.31	1	2	1
26.8023	-1393.18	1	2	1
26.8509	-1429.88	1	2	1
26.8995	-1459.44	1	2	1
26.9481	-1495.32	1	2	1
26.9967	-1537.44	1	2	1
27.0453	-1565.26	1	2	1
27.0592	-1578.98	1	2	1
31.0731	-8970.44	1	2	1
0.0106073	-4.37219	1	1	1
0.0244962	-4.17851	1	1	1
0.0661628	-4.70858	1	1	1
0.107829	-4.66781	1	1	1
0.149496	-5.02459	1	1	1
0.205052	-5.58524	1	1	1
0.267552	-6.19686	1	1	1
0.309218	-6.17647	1	1	1
0.350885	-6.59441	1	1	1
0.392552	-6.93081	1	1	1
0.434218	-7.31817	1	1	1
0.475885	-7.63417	1	1	1
0.517552	-7.95017	1	1	1
0.559218	-8.24579	1	1	1
0.600885	-8.5516	1	1	1
0.642552	-8.82683	1	1	1
0.684218	-8.89819	1	1	1
0.725885	-9.26516	1	1	1
0.781441	-9.15303	1	1	1
0.830052	-9.45884	1	1	1
0.871718	-9.82581	1	1	1
0.913385	-10.2438	1	1	1
0.955052	-10.468	1	1	1
0.996718	-9.76465	1	1	1
1.03839	-10.6923	1	1	1
1.08005	-10.9777	1	1	1
1.12172	-11.4058	1	1	1
1.16339	-11.5689	1	1	1
1.20505	-11.2325	1	1	1
1.24672	-11.5383	1	1	1
1.28839	-11.9563	1	1	1
1.33005	-12.1194	1	1	1
1.37172	-12.3335	1	1	1
1.42727	-12.4252	1	1	1
1.46894	-12.6597	1	1	1
1.51755	-12.5679	1	1	1
1.55922	-12.9247	1	1	1
1.60089	-12.9451	1	1	1
1.64255	-13.1999	1	1	1
1.68422	-13.4038	1	1	1
1.72589	-13.5159	1	1	1
1.76755	-13.6892	1	1	1
1.80922	-13.8931	1	1	1
1.85089	-13.9644	1	1	1
1.8995	-14.3314	1	1	1
1.94116	-14.6168	1	1	1
1.98283	-14.7596	1	1	1
2.0245	-15.0654	1	1	1
2.06616	-15.3304	1	1	1
2.10783	-15.626	1	1	1
2.1495	-15.7076	1	1	1
2.19116	-16.0338	1	1	1
2.23283	-16.2784	1	1	1
2.2745	-16.4721	1	1	1
2.31616	-16.7575	1	1	1
2.35783	-16.8289	1	1	1
2.3995	-17.0531	1	1	1
2.44116	-17.1245	1	1	1
2.48977	-17.3182	1	1	1
2.53144	-17.4915	1	1	1
2.57311	-17.624	1	1	1
2.61477	-17.7259	1	1	1
2.65644	-17.7055	1	1	1
2.69811	-16.992	1	1	1
2.73977	-17.5424	1	1	1
2.78144	-17.8788	1	1	1
2.82311	-17.9604	1	1	1
2.86477	-18.205	1	1	1
2.90644	-18.3171	1	1	1
2.94811	-18.623	1	1	1
2.98977	-18.8268	1	1	1
3.03144	-18.9899	1	1	1
3.07311	-19.1836	1	1	1
3.11477	-19.2346	1	1	1
3.15644	-19.3569	1	1	1
3.20505	-19.4486	1	1	1
3.24672	-19.3773	1	1	1
3.28839	-19.5302	1	1	1
3.337	-19.6219	1	1	1
3.37866	-19.7646	1	1	1
3.42033	-19.7748	1	1	1
3.462	-19.9176	1	1	1
3.50366	-20.0297	1	1	1
3.54533	-20.101	1	1	1
3.587	-20.2438	1	1	1
3.62866	-20.3661	1	1	1
3.67033	-20.468	1	1	1
3.712	-20.6107	1	1	1
3.75366	-20.7229	1	1	1
3.79533	-20.7127	1	1	1
3.837	-20.886	1	1	1
3.88561	-21.0287	1	1	1
3.92727	-21.1918	1	1	1
3.96894	-21.3345	1	1	1
4.01061	-21.3956	1	1	1
4.05227	-21.6199	1	1	1
4.09394	-21.8136	1	1	1
4.13561	-21.9869	1	1	1
4.17727	-22.1602	1	1	1
4.21894	-22.2213	1	1	1
4.26061	-22.3233	1	1	1
4.30227	-22.4048	1	1	1
4.34394	-22.4762	1	1	1
4.38561	-22.6393	1	1	1
4.42727	-22.68	1	1	1
4.46894	-22.782	1	1	1
4.51061	-22.9247	1	1	1
4.55227	-23.047	1	1	1
4.59394	-23.1693	1	1	1
4.63561	-23.2101	1	1	1
4.67727	-23.3426	1	1	1
4.71894	-23.4446	1	1	1
4.76061	-23.6382	1	1	1
4.80227	-23.8115	1	1	1
4.84394	-23.9746	1	1	1
4.88561	-24.0766	1	1	1
4.92727	-24.1785	1	1	1
4.96894	-24.413	1	1	1
5.0245	-24.729	1	1	1
5.06616	-24.9838	1	1	1
5.10783	-25.2183	1	1	1
5.1495	-25.4119	1	1	1
5.19116	-25.5649	1	1	1
5.23283	-25.6362	1	1	1
5.2745	-25.8197	1	1	1
5.31616	-25.9522	1	1	1
5.35783	-26.0032	1	1	1
5.3995	-26.0745	1	1	1
5.44116	-26.2172	1	1	1
5.48283	-26.2886	1	1	1
5.5245	-26.3702	1	1	1
5.56616	-26.4517	1	1	1
5.60783	-26.5027	1	1	1
5.6495	-26.5333	1	1	1
5.69116	-26.7167	1	1	1
5.73283	-26.8391	1	1	1
5.7745	-26.9716	1	1	1
5.81616	-27.1041	1	1	1
5.85783	-27.2366	1	1	1
5.90644	-27.1755	1	1	1
5.94811	-27.5322	1	1	1
5.98977	-27.838	1	1	1
6.03144	-28.1031	1	1	1
6.07311	-28.3579	1	1	1
6.11477	-28.572	1	1	1
6.15644	-28.7453	1	1	1
6.19811	-28.8778	1	1	1
6.23977	-29.0511	1	1	1
6.28144	-29.1632	1	1	1
6.32311	-29.2448	1	1	1
6.36477	-29.3161	1	1	1
6.40644	-29.4079	1	1	1
6.44811	-29.52	1	1	1
6.48977	-29.6423	1	1	1
6.53144	-29.7443	1	1	1
6.57311	-29.8666	1	1	1
6.61477	-29.9074	1	1	1
6.65644	-30.101	1	1	1
6.69811	-30.1724	1	1	1
6.73977	-30.3049	1	1	1
6.78144	-30.4782	1	1	1
6.82311	-30.5903	1	1	1
6.86477	-30.7025	1	1	1
6.90644	-30.7942	1	1	1
6.94811	-30.9573	1	1	1
6.99672	-31.0796	1	1	1
7.03839	-31.2223	1	1	1
7.08005	-31.3447	1	1	1
7.12172	-31.4262	1	1	1
7.16339	-31.5995	1	1	1
7.20505	-31.6505	1	1	1
7.24672	-31.7524	1	1	1
7.28839	-31.9053	1	1	1
7.33005	-32.0175	1	1	1
7.37172	-32.1296	1	1	1
7.41339	-32.2213	1	1	1
7.45505	-32.3538	1	1	1
7.49672	-32.415	1	1	1
7.53839	-32.5373	1	1	1
7.58005	-32.6698	1	1	1
7.62172	-32.7922	1	1	1
7.66339	-32.8839	1	1	1
7.70505	-32.8329	1	1	1
7.74672	-33.0674	1	1	1
7.78839	-33.1999	1	1	1
7.83005	-33.4446	1	1	1
7.87172	-33.6281	1	1	1
7.91339	-33.781	1	1	1
7.95505	-33.9339	1	1	1
7.99672	-34.1072	1	1	1
8.03839	-34.2601	1	1	1
8.08005	-34.4232	1	1	1
8.12172	-34.6474	1	1	1
8.16339	-34.8615	1	1	1
8.20505	-34.8819	1	1	1
8.24672	-35.2081	1	1	1
8.28839	-35.361	1	1	1
8.33005	-35.5547	1	1	1
8.37172	-35.7687	1	1	1
8.41339	-35.9522	1	1	1
8.45505	-36.1561	1	1	1
8.49672	-36.36	1	1	1
8.53839	-36.5944	1	1	1
8.58005	-36.8289	1	1	1
8.62866	-37.0837	1	1	1
8.67033	-37.2264	1	1	1
8.712	-37.4405	1	1	1
8.75366	-37.7157	1	1	1
8.79533	-38.0113	1	1	1
8.837	-38.2254	1	1	1
8.87866	-38.5312	1	1	1
8.92033	-38.7759	1	1	1
8.962	-39.1224	1	1	1
9.00366	-39.5098	1	1	1
9.04533	-39.8666	1	1	1
9.087	-40.2539	1	1	1
9.12866	-40.2336	1	1	1
9.17033	-40.7127	1	1	1
9.212	-41.0389	1	1	1
9.25366	-41.3141	1	1	1
9.29533	-41.6301	1	1	1
9.337	-41.8442	1	1	1
9.37866	-42.15	1	1	1
9.42033	-42.4558	1	1	1
9.462	-42.7718	1	1	1
9.50366	-43.0776	1	1	1
9.54533	-43.4446	1	1	1
9.587	-43.7504	1	1	1
9.62866	-44.0664	1	1	1
9.67033	-44.3722	1	1	1
9.712	-44.7799	1	1	1
9.75366	-45.0654	1	1	1
9.79533	-45.3916	1	1	1
9.84394	-45.891	1	1	1
9.88561	-46.2478	1	1	1
9.92727	-46.4823	1	1	1
9.96894	-46.992	1	1	1
10.0176	-47.4711	1	1	1
10.0592	-47.94	1	1	1
10.1009	-48.2458	1	1	1
10.1426	-48.7147	1	1	1
10.1842	-49.1428	1	1	1
10.2259	-49.5302	1	1	1
10.2676	-49.8666	1	1	1
10.3092	-50.2438	1	1	1
10.3509	-50.6209	1	1	1
10.3926	-51.0491	1	1	1
10.4342	-51.5078	1	1	1
10.4759	-52.0073	1	1	1
10.5176	-52.5373	1	1	1
10.5592	-53.1388	1	1	1
10.6009	-53.1286	1	1	1
10.6426	-53.8115	1	1	1
10.6842	-54.4028	1	1	1
10.7259	-54.9838	1	1	1
10.7676	-55.5445	1	1	1
10.8092	-56.0032	1	1	1
10.8509	-56.6046	1	1	1
10.8926	-57.2366	1	1	1
10.9342	-57.838	1	1	1
10.9759	-58.3987	1	1	1
11.0176	-58.9593	1	1	1
11.0662	-59.785	1	1	1
11.1078	-60.3967	1	1	1
11.1495	-61.0694	1	1	1
11.1912	-61.6913	1	1	1
11.2328	-62.3538	1	1	1
11.2745	-63.0572	1	1	1
11.3162	-63.6484	1	1	1
11.3578	-64.3722	1	1	1
11.3995	-65.0348	1	1	1
11.4412	-65.728	1	1	1
11.4828	-66.4619	1	1	1
11.5245	-67.0633	1	1	1
11.5662	-67.7769	1	1	1
11.6078	-68.4802	1	1	1
11.6495	-69.1123	1	1	1
11.6912	-69.8156	1	1	1
11.7328	-70.3355	1	1	1
11.7814	-71.1	1	1	1
11.8231	-71.8442	1	1	1
11.8648	-72.7616	1	1	1
11.9134	-73.4853	1	1	1
11.9551	-74.3212	1	1	1
11.9967	-74.9532	1	1	1
12.0384	-75.7076	1	1	1
12.0801	-76.4313	1	1	1
12.1287	-77.1245	1	1	1
12.1703	-77.9094	1	1	1
12.212	-78.7657	1	1	1
12.2537	-79.5914	1	1	1
12.2953	-80.5496	1	1	1
12.337	-81.4874	1	1	1
12.3787	-82.4762	1	1	1
12.4203	-83.363	1	1	1
12.462	-84.3416	1	1	1
12.5037	-85.3202	1	1	1
12.5453	-86.3294	1	1	1
12.587	-87.4405	1	1	1
12.6287	-88.5618	1	1	1
12.6703	-89.7443	1	1	1
12.712	-90.7534	1	1	1
12.7606	-92.0582	1	1	1
12.8023	-93.0062	1	1	1
12.8439	-94.0562	1	1	1
12.8856	-95.2285	1	1	1
12.9273	-96.5027	1	1	1
12.9689	-97.6749	1	1	1
13.0106	-98.9186	1	1	1
13.0523	-100.193	1	1	1
13.0939	-101.722	1	1	1
13.1356	-102.762	1	1	1
13.1773	-104.179	1	1	1
13.2189	-105.361	1	1	1
13.2606	-106.717	1	1	1
13.3023	-108.266	1	1	1
13.3439	-109.52	1	1	1
13.3856	-111.018	1	1	1
13.4273	-112.384	1	1	1
13.4689	-113.863	1	1	1
13.5106	-115.3	1	1	1
13.5523	-116.788	1	1	1
13.5939	-118.266	1	1	1
13.6356	-119.805	1	1	1
13.6773	-121.069	1	1	1
13.7259	-122.833	1	1	1
13.7676	-124.158	1	1	1
13.8092	-125.718	1	1	1
13.8509	-126.961	1	1	1
13.8926	-128.246	1	1	1
13.9342	-129.887	1	1	1
13.9759	-131.508	1	1	1
14.0176	-132.955	1	1	1
14.0592	-134.545	1	1	1
14.1078	-136.401	1	1	1
14.1495	-137.889	1	1	1
14.1912	-139.204	1	1	1
14.2398	-141.08	1	1	1
14.2814	-142.486	1	1	1
14.3231	-143.924	1	1	1
14.3648	-145.453	1	1	1
14.4134	-147.4	1	1	1
14.4551	-149.102	1	1	1
14.5106	-151.365	1	1	1
14.5523	-153.016	1	1	1
14.6078	-155.177	1	1	1
14.6495	-156.768	1	1	1
14.6912	-158.327	1	1	1
14.7328	-159.693	1	1	1
14.7745	-160.866	1	1	1
14.8231	-162.609	1	1	1
14.8648	-163.781	1	1	1
14.9064	-165.208	1	1	1
14.9481	-166.574	1	1	1
14.9967	-168.113	1	1	1
15.0453	-169.928	1	1	1
15.087	-171.222	1	1	1
15.1287	-172.517	1	1	1
15.1703	-173.791	1	1	1
15.212	-175.167	1	1	1
15.2606	-176.543	1	1	1
15.3023	-177.706	1	1	1
15.3439	-178.857	1	1	1
15.3856	-179.999	1	1	1
15.4273	-181.171	1	1	1
15.4689	-182.282	1	1	1
15.5106	-183.445	1	1	1
15.5523	-184.505	1	1	1
15.6009	-185.82	1	1	1
15.6426	-186.921	1	1	1
15.6842	-187.736	1	1	1
15.7259	-188.817	1	1	1
15.7745	-190.101	1	1	1
15.8231	-191.538	1	1	1
15.8648	-187.971	1	1	1
15.9064	-193.944	1	1	1
15.9481	-195.402	1	1	1
15.9898	-196.839	1	1	1
16.0384	-198.419	1	1	1
16.0801	-199.897	1	1	1
16.1217	-201.273	1	1	1
16.1634	-202.537	1	1	1
16.2051	-204.056	1	1	1
16.2467	-205.402	1	1	1
16.2884	-206.594	1	1	1
16.3301	-207.797	1	1	1
16.3717	-208.929	1	1	1
16.4134	-210.142	1	1	1
16.4551	-211.569	1	1	1
16.4967	-212.792	1	1	1
16.5453	-214.27	1	1	1
16.587	-215.585	1	1	1
16.6287	-216.921	1	1	1
16.6773	-218.541	1	1	1
16.7189	-219.928	1	1	1
16.7606	-221.008	1	1	1
16.8023	-222.619	1	1	1
16.8439	-224.097	1	1	1
16.8856	-225.473	1	1	1
16.9273	-227.124	1	1	1
16.9689	-228.378	1	1	1
17.0106	-230.009	1	1	1
17.0523	-231.722	1	1	1
17.0939	-233.516	1	1	1
17.1426	-235.769	1	1	1
17.1842	-237.522	1	1	1
17.2259	-239.408	1	1	1
17.2676	-241.131	1	1	1
17.3092	-242.741	1	1	1
17.3509	-244.535	1	1	1
17.3926	-246.299	1	1	1
17.4342	-247.909	1	1	1
17.4759	-249.744	1	1	1
17.5176	-251.549	1	1	1
17.5592	-253.383	1	1	1
17.6009	-255.29	1	1	1
17.6426	-257.206	1	1	1
17.6842	-258.99	1	1	1
17.7259	-259.286	1	1	1
17.7676	-263.414	1	1	1
17.8092	-265.381	1	1	1
17.8509	-267.787	1	1	1
17.8926	-270.009	1	1	1
17.9342	-272.13	1	1	1
17.9759	-274.117	1	1	1
18.0245	-276.829	1	1	1
18.0662	-279.235	1	1	1
18.1078	-280.682	1	1	1
18.1495	-283.852	1	1	1
18.1912	-285.789	1	1	1
18.2328	-288.694	1	1	1
18.2745	-290.702	1	1	1
18.3162	-293.118	1	1	1
18.3717	-296.503	1	1	1
18.4134	-298.929	1	1	1
18.4551	-301.712	1	1	1
18.4967	-303.699	1	1	1
18.5384	-306.666	1	1	1
18.5801	-309.255	1	1	1
18.6217	-311.763	1	1	1
18.6634	-314.841	1	1	1
18.7051	-317.655	1	1	1
18.7467	-320.539	1	1	1
18.7884	-323.353	1	1	1
18.837	-327.002	1	1	1
18.8787	-329.673	1	1	1
18.9203	-332.537	1	1	1
18.9689	-336.197	1	1	1
19.0106	-339	1	1	1
19.0523	-341.977	1	1	1
19.0939	-345.473	1	1	1
19.1356	-348.123	1	1	1
19.1773	-351.09	1	1	1
19.2189	-354.8	1	1	1
19.2606	-358.001	1	1	1
19.3023	-361.222	1	1	1
19.3439	-364.515	1	1	1
19.3856	-368.338	1	1	1
19.4273	-372.191	1	1	1
19.4759	-376.656	1	1	1
19.5245	-381.365	1	1	1
19.5731	-385.657	1	1	1
19.6217	-390.152	1	1	1
19.6703	-387.349	1	1	1
19.7189	-398.225	1	1	1
19.7676	-403.159	1	1	1
19.8162	-409.418	1	1	1
19.8648	-413.689	1	1	1
19.9134	-419.112	1	1	1
19.962	-425.453	1	1	1
20.0106	-430.366	1	1	1
20.0592	-435.208	1	1	1
20.1078	-441.202	1	1	1
20.1564	-445.616	1	1	1
20.2051	-449.979	1	1	1
20.2537	-459.153	1	1	1
20.3023	-466.085	1	1	1
20.3509	-472.894	1	1	1
20.3995	-479.826	1	1	1
20.4481	-487.135	1	1	1
20.4967	-495.32	1	1	1
20.5453	-503.353	1	1	1
20.5939	-511.253	1	1	1
20.6426	-516.972	1	1	1
20.6981	-525.544	1	1	1
20.7467	-532.935	1	1	1
20.7953	-540.05	1	1	1
20.8439	-552.751	1	1	1
20.8926	-562.527	1	1	1
20.9412	-570.254	1	1	1
20.9967	-580.397	1	1	1
21.0453	-588.643	1	1	1
21.0939	-598.541	1	1	1
21.1426	-609.754	1	1	1
21.1912	-622.068	1	1	1
21.2398	-632.558	1	1	1
21.2884	-639.979	1	1	1
21.337	-649.795	1	1	1
21.3856	-659.041	1	1	1
21.4342	-670.743	1	1	1
21.4828	-678.205	1	1	1
21.5314	-689.571	1	1	1
21.5801	-695.901	1	1	1
21.6287	-706.686	1	1	1
21.6773	-718.429	1	1	1
21.7328	-729.51	1	1	1
21.7814	-740.723	1	1	1
21.8301	-753.424	1	1	1
21.8787	-765.218	1	1	1
21.9273	-776.605	1	1	1
21.9828	-791.365	1	1	1
22.0384	-808.215	1	1	1
22.087	-823.394	1	1	1
22.1356	-841.712	1	1	1
22.1842	-856.187	1	1	1
22.2328	-869.224	1	1	1
22.2884	-889.724	1	1	1
22.337	-892.914	1	1	1
22.3787	-914.036	1	1	1
26.0106	-8970.44	1	1	1
0.651581	0.89239	2	0	100000
1.181	0.867131	2	0	100000
1.69511	0.846375	2	0	100000
1.86554	0.839442	2	0	100000
2.16864	0.820837	2	0	100000
2.63371	0.798765	2	0	100000
2.96949	0.783984	2	0	100000
3.22308	0.772271	2	0	100000
3.76337	0.754064	2	0	100000
4.18663	0.736813	2	0	100000
4.699	0.718446	2	0	100000
4.89944	0.71012	2	0	100000
5.20281	0.693944	2	0	100000
5.64779	0.67749	2	0	100000
5.87229	0.669641	2	0	100000
6.10043	0.657809	2	0	100000
6.67913	0.636175	2	0	100000
6.88779	0.629363	2	0	100000
7.15512	0.620637	2	0	100000
7.6899	0.605498	2	0	100000
8.16504	0.590398	2	0	100000
8.73699	0.569044	2	0	100000
8.89223	0.563147	2	0	100000
9.10969	0.55247	2	0	100000
9.72925	0.524781	2	0	100000
10.0798	0.508765	2	0	100000
10.5617	0.487211	2	0	100000
11.1882	0.458566	2	0	100000
11.7042	0.435777	2	0	100000
11.8711	0.429323	2	0	100000
12.0874	0.421036	2	0	100000
12.6762	0.39749	2	0	100000
12.8762	0.389203	2	0	100000
13.1736	0.376215	2	0	100000
13.6674	0.355896	2	0	100000
13.8596	0.348287	2	0	100000
14.0874	0.338845	2	0	100000
14.1025	0.338167	2	0	100000
14.81	0.308725	2	0	100000
15.0269	0.299801	2	0	100000
15.1413	0.294781	2	0	100000
15.712	0.272311	2	0	100000
15.8647	0.266295	2	0	100000
16.1453	0.253586	2	0	100000
16.7296	0.230757	2	0	100000
16.9739	0.222271	2	0	100000
17.1459	0.215976	2	0	100000
17.7232	0.199363	2	0	100000
18.1665	0.187689	2	0	100000
18.6812	0.175618	2	0	100000
18.9786	0.169323	2	0	100000
19.2618	0.163386	2	0	100000
19.6576	0.1551	2	0	100000
20.1312	0.145219	2	0	100000
20.6694	0.134263	2	0	100000
21.1942	0.124303	2	0	100000
21.6948	0.116375	2	0	100000
21.9497	0.112311	2	0	100000
22.0694	0.110239	2	0	100000
22.7082	0.101076	2	0	100000
22.8801	0.0986853	2	0	100000
23.0887	0.0957769	2	0	100000
23.7942	0.0866135	2	0	100000
24.1273	0.0820319	2	0	100000
24.8021	0.0738247	2	0	100000
25.2605	0.068008	2	0	100000
25.6862	0.0628685	2	0	100000
26.069	0.0583267	2	0	100000
26.6628	0.0517131	2	0	100000
27.0358	0.0478088	2	0	100000
27.7034	0.0415139	2	0	100000
28.6329	0.0335857	2	0	100000
29.0646	0.0301992	2	0	100000
29.7352	0.0249004	2	0	100000
30.1643	0.0214343	2	0	100000
30.7104	0.0174502	2	0	100000
31.0899	0.0150598	2	0	100000

## Sheet: tens_interpolation
		Datum / Zeit	Tension unten [hPa]	Tension oben [hPa]
m_bot	b_bot	2013-07-31 15:49:15	0.65	3.59
82.8	-3.43509e+06	2013-07-31 16:09:15	1.8	4.76
m_top	b_top	2013-07-31 15:53:59	0.921717	3.86644
84.24	-3.49483e+06	y = m*x+b
		AE unten [t]	AE oben [t]
		41227.2
			Brutto-Gewicht [g]	Netto-Gewicht [g]
-1.40314	58626.9	2013-08-23 17:58:52	382.99	12.72
		2013-08-24 10:54:53	382	11.73
-1.40314	58256.7	2013-08-24 06:49:00	382.24	11.9696
			AE unten
m_bot	b_bot	41517.8	383.18	14.98
-1.7395	72603.4	41518.4	381.97	13.77
m_top	b_top	2013-08-31 17:39:15	383.209	15.0092
-1.7395	72235.2	y = m*x+b
