# Supplementary material for: A pore-size classification for peat bogs derived from unsaturated hydraulic properties
Source: Copernicus journal article supplement (doi:10.5194/hess-21-6185-2017), 2017-12-07
Supplement: Supplementary file 14 [file G4_HYDRUS.xlsx]

## Sheet: Gewicht
Datum / Zeit	Brutto-Gewicht [g]	Netto-Gewicht [g]	Gewichtsänderung [g]	Zeit [d]	Theta [-]	Verdunstungsrate [cm/d]		Volumen	247
2013-07-31 14:50:13	608.39	236.59	0					Höhe	5
2013-08-01 07:30:40	600.69	228.89	-7.7	0.694756	0.878178	0.224353		A	49.4
2013-08-01 20:11:39	594.2	222.4	-14.19	1.22322	0.851903	0.248603		Theta0	0.909352
2013-08-02 08:32:38	588.5	216.7	-19.89	1.73779	0.828826	0.224234		Trockengewicht	11.98
2013-08-02 12:38:32	586.74	214.94	-21.65	1.90855	0.8217	0.20864		Ks (as in Ksat)
2013-08-02 19:13:49	582.76	210.96	-25.63	2.18305	0.805587	0.293501		delta System [g]	371.8
2013-08-03 07:04:20	576.65	204.85	-31.74	2.67647	0.78085	0.250669
2013-08-03 15:08:02	572.98	201.18	-35.41	3.01237	0.765992	0.221173
2013-08-03 20:49:23	570.29	198.49	-38.1	3.24942	0.755101	0.229709
2013-08-04 10:11:56	565.23	193.43	-43.16	3.80675	0.734615	0.183786
2013-08-04 20:03:44	560.9	189.1	-47.49	4.21771	0.717085	0.213283
2013-08-05 08:38:29	555.76	183.96	-52.63	4.74185	0.696275	0.198514
2013-08-05 13:26:30	553.65	181.85	-54.74	4.94186	0.687733	0.213553
2013-08-05 20:44:14	549.82	178.02	-58.57	5.24584	0.672227	0.255048
2013-08-06 07:02:49	545.64	173.84	-62.75	5.67541	0.655304	0.196976
2013-08-06 12:48:12	543.44	171.64	-64.95	5.91526	0.646397	0.185678
2013-08-06 18:16:31	540.6	168.8	-67.79	6.14327	0.634899	0.252145
2013-08-07 08:09:56	534.89	163.09	-73.5	6.72202	0.611781	0.199717
2013-08-07 13:10:20	533.01	161.21	-75.38	6.93063	0.60417	0.18243
2013-08-07 19:13:46	530.79	158.99	-77.6	7.18302	0.595182	0.178058
2013-08-08 08:25:35	526.38	154.58	-82.01	7.73289	0.577328	0.16235
2013-08-08 19:49:50	522.24	150.44	-86.15	8.20807	0.560567	0.176366
2013-08-09 09:14:01	516.65	144.85	-91.74	8.76653	0.537935	0.202624
2013-08-09 13:05:48	514.87	143.07	-93.52	8.92749	0.530729	0.223854
2013-08-09 18:30:08	512.07	140.27	-96.32	9.15272	0.519393	0.251655
2013-08-10 09:22:16	504.57	132.77	-103.82	9.77225	0.489028	0.24506
2013-08-10 17:26:59	500.54	128.74	-107.85	10.1089	0.472713	0.242356
2013-08-11 05:20:32	494.62	122.82	-113.77	10.6044	0.448745	0.241837
2013-08-11 20:23:09	486.79	114.99	-121.6	11.2312	0.417045	0.252868
2013-08-12 08:15:30	480.82	109.02	-127.57	11.7259	0.392874	0.244296
2013-08-12 12:46:30	478.84	107.04	-129.55	11.9141	0.384858	0.212988
2013-08-12 17:56:56	476.54	104.74	-131.85	12.1297	0.375547	0.215968
2013-08-13 08:05:38	470	98.2	-138.39	12.719	0.349069	0.224624
2013-08-13 12:53:44	467.71	95.91	-140.68	12.9191	0.339798	0.231704
2013-08-13 19:32:40	464.55	92.75	-143.84	13.1961	0.327004	0.2309
2013-08-14 07:52:55	458.7	86.9	-149.69	13.7102	0.30332	0.230361
2013-08-14 12:29:45	456.65	84.85	-151.74	13.9024	0.29502	0.215866
2013-08-14 17:58:08	454.15	82.35	-154.24	14.1305	0.284899	0.221913
2013-08-14 18:20:19	453.98	82.18	-154.41	14.1459	0.284211	0.223429
2013-08-15 11:01:07	445.99	74.19	-162.4	14.8409	0.251862	0.232722
2013-08-15 16:30:53	443.46	71.66	-164.93	15.0699	0.241619	0.223639
2013-08-15 19:15:40	442.16	70.36	-166.23	15.1843	0.236356	0.229949
2013-08-16 08:57:22	436.36	64.56	-172.03	15.755	0.212874	0.205758
2013-08-16 12:37:25	434.89	63.09	-173.5	15.9078	0.206923	0.194721
2013-08-16 19:24:13	431.95	60.15	-176.44	16.1903	0.19502	0.210676
2013-08-17 09:22:33	426.65	54.85	-181.74	16.7725	0.173563	0.184284
2013-08-17 15:03:29	424.78	52.98	-183.61	17.0092	0.165992	0.159888
2013-08-17 19:25:01	423.31	51.51	-185.08	17.1908	0.16004	0.163846
2013-08-18 09:16:32	419.43	47.63	-188.96	17.7683	0.144332	0.136017
2013-08-18 19:51:57	416.64	44.84	-191.75	18.2095	0.133036	0.127991
2013-08-19 08:12:58	413.64	41.84	-194.75	18.7241	0.120891	0.118014
2013-08-19 15:21:23	412.1	40.3	-196.29	19.0216	0.114656	0.104781
2013-08-19 22:08:46	410.63	38.83	-197.76	19.3045	0.108704	0.105185
2013-08-20 07:39:00	408.58	36.78	-199.81	19.7005	0.100405	0.104794
2013-08-20 19:03:48	406.2	34.4	-202.19	20.1761	0.0907692	0.10131
2013-08-21 07:56:02	403.62	31.82	-204.77	20.7124	0.0803239	0.0973876
2013-08-21 20:34:36	401.39	29.59	-207	21.2391	0.0712955	0.085694
2013-08-22 08:32:43	399.65	27.85	-208.74	21.7378	0.064251	0.0706292
2013-08-22 14:29:50	398.79	26.99	-209.6	21.9858	0.0607692	0.0701966
2013-08-22 17:31:01	398.34	26.54	-210.05	22.1117	0.0589474	0.0723986
2013-08-23 08:51:51	396.36	24.56	-212.03	22.7511	0.0509312	0.0626791
2013-08-23 12:59:12	395.85	24.05	-212.54	22.9229	0.0488664	0.0601013
2013-08-23 17:59:56	395.26	23.46	-213.13	23.1317	0.0464777	0.0571901
2013-08-24 10:55:45	393.32	21.52	-215.07	23.8372	0.0386235	0.0556696
2013-08-24 18:58:34	392.38	20.58	-216.01	24.1725	0.0348178	0.0567521
2013-08-25 11:07:10	390.66	18.86	-217.73	24.8451	0.0278543	0.0517635
2013-08-25 17:59:15	389.927	18.1269	-218.91	25.1313	0.0248863	0.0518568

## Sheet: Tensionen
Datum / Zeit	Tension unten [hPa]	Tension oben [hPa]		Zeit [d]	MP bot(2) [cm]	MP top(1) [cm]	Auswahl	WÄGUNG START
2013-07-29 14:32:20	2.44	5.03		-2.01242	-2.48726	-5.12742		41486.6	-5.79001
2013-07-29 14:33:20	2.51	5.1		-2.01173	-2.55861	-5.19878		2013-08-25 09:29:15
2013-07-29 14:34:20	2.57	5.17		-2.01103	-2.61978	-5.27013
2013-07-29 14:35:20	2.63	5.21		-2.01034	-2.68094	-5.31091
2013-07-29 14:36:20	2.67	5.26		-2.00964	-2.72171	-5.36188
2013-07-29 14:37:20	2.72	5.3		-2.00895	-2.77268	-5.40265
2013-07-29 14:38:20	2.75	5.31		-2.00825	-2.80326	-5.41284
2013-07-29 14:39:20	2.79	5.38		-2.00756	-2.84404	-5.4842
2013-07-29 14:40:20	2.85	5.43		-2.00686	-2.9052	-5.53517
2013-07-29 14:41:20	2.87	5.46		-2.00617	-2.92559	-5.56575
2013-07-29 14:42:20	2.91	5.49		-2.00548	-2.96636	-5.59633
2013-07-29 14:43:20	2.95	5.54		-2.00478	-3.00714	-5.6473
2013-07-29 14:44:20	2.98	5.56		-2.00409	-3.03772	-5.66769
2013-07-29 14:45:20	3	5.6		-2.00339	-3.0581	-5.70846
2013-07-29 14:46:20	3.03	5.62		-2.0027	-3.08869	-5.72885
2013-07-29 14:47:20	3.05	5.64		-2.002	-3.10907	-5.74924
2013-07-29 14:48:20	3.07	5.66		-2.00131	-3.12946	-5.76962
2013-07-29 14:49:20	3.09	5.68		-2.00061	-3.14985	-5.79001
2013-07-29 14:50:20	2.98	4.72		-1.99992	-3.03772	-4.81142
2013-07-29 14:51:20	2.96	5.55		-1.99923	-3.01733	-5.65749
2013-07-29 14:52:20	3	5.6		-1.99853	-3.0581	-5.70846
2013-07-29 14:53:20	3.04	5.64		-1.99784	-3.09888	-5.74924
2013-07-29 14:54:20	3.07	5.66		-1.99714	-3.12946	-5.76962
2013-07-29 14:55:20	3.1	5.69		-1.99645	-3.16004	-5.8002
2013-07-29 14:56:20	3.14	5.73		-1.99575	-3.20082	-5.84098
2013-07-29 14:57:20	3.15	5.75		-1.99506	-3.21101	-5.86137
2013-07-29 14:58:20	-0.15	2.41		-1.99436	0.152905	-2.45668
2013-07-29 14:59:20	0.2	2.78		-1.99367	-0.203874	-2.83384
2013-07-29 15:00:20	0.43	3.01		-1.99298	-0.438328	-3.0683
2013-07-29 15:01:20	0.62	3.2		-1.99228	-0.632008	-3.26198
2013-07-29 15:02:20	0.78	3.36		-1.99159	-0.795107	-3.42508
2013-07-29 15:03:20	0.91	3.5		-1.99089	-0.927625	-3.56779
2013-07-29 15:04:20	1.05	3.63		-1.9902	-1.07034	-3.70031
2013-07-29 15:05:20	1.16	3.74		-1.9895	-1.18247	-3.81244
2013-07-29 15:06:20	1.26	3.83		-1.98881	-1.2844	-3.90418
2013-07-29 15:07:20	1.36	3.95		-1.98811	-1.38634	-4.0265
2013-07-29 15:08:20	1.43	4.02		-1.98742	-1.4577	-4.09786
2013-07-29 15:09:20	1.5	4.09		-1.98673	-1.52905	-4.16922
2013-07-29 15:10:20	1.58	4.16		-1.98603	-1.6106	-4.24057
2013-07-29 15:11:20	1.63	4.22		-1.98534	-1.66157	-4.30173
2013-07-29 15:12:20	1.67	4.27		-1.98464	-1.70234	-4.3527
2013-07-29 15:13:20	1.72	4.32		-1.98395	-1.75331	-4.40367
2013-07-29 15:14:20	1.76	4.35		-1.98325	-1.79409	-4.43425
2013-07-29 15:15:20	1.8	4.39		-1.98256	-1.83486	-4.47503
2013-07-29 15:16:20	1.84	4.43		-1.98186	-1.87564	-4.5158
2013-07-29 15:17:20	1.88	4.46		-1.98117	-1.91641	-4.54638
2013-07-29 15:18:20	1.91	4.5		-1.98048	-1.94699	-4.58716
2013-07-29 15:19:20	1.94	4.53		-1.97978	-1.97757	-4.61774
2013-07-29 15:20:20	1.98	4.57		-1.97909	-2.01835	-4.65851
2013-07-29 15:21:20	2	4.58		-1.97839	-2.03874	-4.66871
2013-07-29 15:22:20	2.02	4.6		-1.9777	-2.05912	-4.68909
2013-07-29 15:23:20	2.03	4.62		-1.977	-2.06932	-4.70948
2013-07-29 15:24:20	2.05	4.63		-1.97631	-2.0897	-4.71967
2013-07-29 15:25:20	2.07	4.65		-1.97561	-2.11009	-4.74006
2013-07-29 15:26:20	2.09	4.67		-1.97492	-2.13048	-4.76045
2013-07-29 15:27:20	2.1	4.68		-1.97423	-2.14067	-4.77064
2013-07-29 15:28:20	2.13	4.71		-1.97353	-2.17125	-4.80122
2013-07-29 15:29:20	2.15	4.73		-1.97284	-2.19164	-4.82161
2013-07-29 15:30:20	2.17	4.76		-1.97214	-2.21203	-4.85219
2013-07-29 15:31:20	2.19	4.78		-1.97145	-2.23242	-4.87258
2013-07-29 15:32:20	2.22	4.8		-1.97075	-2.263	-4.89297
2013-07-29 15:42:20	2.34	4.93		-1.96381	-2.38532	-5.02548
2013-07-29 15:52:20	2.47	5.05		-1.95686	-2.51784	-5.14781
2013-07-29 16:02:20	2.59	5.17		-1.94992	-2.64016	-5.27013
2013-07-29 16:12:20	2.69	5.27		-1.94298	-2.7421	-5.37207
2013-07-29 16:22:20	2.81	5.39		-1.93603	-2.86442	-5.49439
2013-07-29 16:32:20	2.91	5.49		-1.92909	-2.96636	-5.59633
2013-07-29 16:42:20	2.88	5.49		-1.92214	-2.93578	-5.59633
2013-07-29 16:52:20	-0.24	2.31		-1.9152	0.244648	-2.35474
2013-07-29 17:02:20	1.95	4.55		-1.90825	-1.98777	-4.63812
2013-07-29 17:12:20	2.02	4.6		-1.90131	-2.05912	-4.68909
2013-07-29 17:22:20	2.25	4.67		-1.89436	-2.29358	-4.76045
2013-07-29 17:32:20	2.17	4.77		-1.88742	-2.21203	-4.86239
2013-07-29 17:42:20	2.2	4.79		-1.88048	-2.24261	-4.88277
2013-07-29 17:52:20	2.24	4.85		-1.87353	-2.28338	-4.94393
2013-07-29 18:02:20	2.26	4.86		-1.86659	-2.30377	-4.95413
2013-07-29 18:12:20	2.2	4.8		-1.85964	-2.24261	-4.89297
2013-07-29 18:22:20	2.22	4.81		-1.8527	-2.263	-4.90316
2013-07-29 18:32:20	2.24	4.83		-1.84575	-2.28338	-4.92355
2013-07-29 18:42:20	2.25	4.85		-1.83881	-2.29358	-4.94393
2013-07-29 18:52:20	2.25	4.85		-1.83186	-2.29358	-4.94393
2013-07-29 19:02:20	2.26	4.85		-1.82492	-2.30377	-4.94393
2013-07-29 19:12:20	2.28	4.87		-1.81798	-2.32416	-4.96432
2013-07-29 19:22:20	2.31	4.9		-1.81103	-2.35474	-4.9949
2013-07-29 19:32:20	2.33	4.92		-1.80409	-2.37513	-5.01529
2013-07-29 19:42:20	2.34	4.93		-1.79714	-2.38532	-5.02548
2013-07-29 19:52:20	2.36	4.96		-1.7902	-2.40571	-5.05607
2013-07-29 20:02:20	2.2	5.23		-1.78325	-2.24261	-5.33129
2013-07-29 20:12:20	1.83	4.43		-1.77631	-1.86544	-4.5158
2013-07-29 20:22:20	1.87	4.47		-1.76936	-1.90622	-4.55657
2013-07-29 20:32:20	1.91	4.51		-1.76242	-1.94699	-4.59735
2013-07-29 20:42:20	1.94	4.53		-1.75548	-1.97757	-4.61774
2013-07-29 20:52:20	1.96	4.56		-1.74853	-1.99796	-4.64832
2013-07-29 21:02:20	1.97	4.58		-1.74159	-2.00815	-4.66871
2013-07-29 21:12:20	2	4.6		-1.73464	-2.03874	-4.68909
2013-07-29 21:22:20	2.03	4.62		-1.7277	-2.06932	-4.70948
2013-07-29 21:32:20	2.05	4.66		-1.72075	-2.0897	-4.75025
2013-07-29 21:42:20	2.07	4.67		-1.71381	-2.11009	-4.76045
2013-07-29 21:52:20	2.1	4.7		-1.70686	-2.14067	-4.79103
2013-07-29 22:02:20	2.11	4.72		-1.69992	-2.15087	-4.81142
2013-07-29 22:12:20	2.13	4.74		-1.69298	-2.17125	-4.8318
2013-07-29 22:22:20	2.15	4.76		-1.68603	-2.19164	-4.85219
2013-07-29 22:32:20	2.18	4.79		-1.67909	-2.22222	-4.88277
2013-07-29 22:42:20	2.21	4.8		-1.67214	-2.2528	-4.89297
2013-07-29 22:52:20	2.22	4.82		-1.6652	-2.263	-4.91335
2013-07-29 23:02:20	2.23	4.84		-1.65825	-2.27319	-4.93374
2013-07-29 23:12:20	2.25	4.86		-1.65131	-2.29358	-4.95413
2013-07-29 23:22:20	2.28	4.88		-1.64436	-2.32416	-4.97452
2013-07-29 23:32:20	2.3	4.9		-1.63742	-2.34455	-4.9949
2013-07-29 23:42:20	2.33	4.92		-1.63048	-2.37513	-5.01529
2013-07-29 23:52:20	2.35	4.95		-1.62353	-2.39551	-5.04587
2013-07-30 00:02:20	2.36	4.96		-1.61659	-2.40571	-5.05607
2013-07-30 00:12:20	2.38	4.98		-1.60964	-2.4261	-5.07645
2013-07-30 00:22:20	2.4	5		-1.6027	-2.44648	-5.09684
2013-07-30 00:32:20	2.43	5.03		-1.59575	-2.47706	-5.12742
2013-07-30 00:42:20	2.44	5.04		-1.58881	-2.48726	-5.13761
2013-07-30 00:52:20	2.46	5.06		-1.58186	-2.50765	-5.158
2013-07-30 01:02:20	2.49	5.08		-1.57492	-2.53823	-5.17839
2013-07-30 01:12:20	2.5	5.11		-1.56798	-2.54842	-5.20897
2013-07-30 01:22:20	2.53	5.13		-1.56103	-2.579	-5.22936
2013-07-30 01:32:20	2.54	5.13		-1.55409	-2.58919	-5.22936
2013-07-30 01:42:20	2.55	5.15		-1.54714	-2.59939	-5.24975
2013-07-30 01:52:20	2.56	5.15		-1.5402	-2.60958	-5.24975
2013-07-30 02:02:20	2.57	5.18		-1.53325	-2.61978	-5.28033
2013-07-30 02:12:20	2.6	5.19		-1.52631	-2.65036	-5.29052
2013-07-30 02:22:20	2.61	5.21		-1.51936	-2.66055	-5.31091
2013-07-30 02:32:20	2.62	5.22		-1.51242	-2.67074	-5.3211
2013-07-30 02:42:20	2.64	5.24		-1.50548	-2.69113	-5.34149
2013-07-30 02:52:20	2.67	5.27		-1.49853	-2.72171	-5.37207
2013-07-30 03:02:20	2.68	5.27		-1.49159	-2.73191	-5.37207
2013-07-30 03:12:20	2.69	5.28		-1.48464	-2.7421	-5.38226
2013-07-30 03:22:20	2.67	5.27		-1.4777	-2.72171	-5.37207
2013-07-30 03:32:20	2.71	5.31		-1.47075	-2.76249	-5.41284
2013-07-30 03:42:20	2.73	5.32		-1.46381	-2.78287	-5.42304
2013-07-30 03:52:20	2.74	5.34		-1.45686	-2.79307	-5.44343
2013-07-30 04:02:20	2.75	5.35		-1.44992	-2.80326	-5.45362
2013-07-30 04:12:20	2.77	5.37		-1.44298	-2.82365	-5.47401
2013-07-30 04:22:20	2.79	5.39		-1.43603	-2.84404	-5.49439
2013-07-30 04:32:20	2.8	5.4		-1.42909	-2.85423	-5.50459
2013-07-30 04:42:20	2.82	5.41		-1.42214	-2.87462	-5.51478
2013-07-30 04:52:20	2.85	5.43		-1.4152	-2.9052	-5.53517
2013-07-30 05:02:20	2.86	5.46		-1.40825	-2.91539	-5.56575
2013-07-30 05:12:20	2.88	5.48		-1.40131	-2.93578	-5.58614
2013-07-30 05:22:20	2.89	5.49		-1.39436	-2.94597	-5.59633
2013-07-30 05:32:20	2.91	5.51		-1.38742	-2.96636	-5.61672
2013-07-30 05:42:20	2.94	5.53		-1.38048	-2.99694	-5.6371
2013-07-30 05:52:20	2.96	5.54		-1.37353	-3.01733	-5.6473
2013-07-30 06:02:20	2.97	5.56		-1.36659	-3.02752	-5.66769
2013-07-30 06:12:20	2.97	5.56		-1.35964	-3.02752	-5.66769
2013-07-30 06:22:20	3	5.58		-1.3527	-3.0581	-5.68807
2013-07-30 06:32:20	2.86	5.46		-1.34575	-2.91539	-5.56575
2013-07-30 06:42:20	2.89	5.47		-1.33881	-2.94597	-5.57594
2013-07-30 06:52:20	2.92	5.5		-1.33186	-2.97655	-5.60652
2013-07-30 07:02:20	2.92	5.51		-1.32492	-2.97655	-5.61672
2013-07-30 07:12:20	2.94	5.53		-1.31798	-2.99694	-5.6371
2013-07-30 07:22:20	2.95	5.54		-1.31103	-3.00714	-5.6473
2013-07-30 07:32:20	2.98	5.57		-1.30409	-3.03772	-5.67788
2013-07-30 07:42:20	2.99	5.58		-1.29714	-3.04791	-5.68807
2013-07-30 07:52:20	3	5.59		-1.2902	-3.0581	-5.69827
2013-07-30 08:02:20	3.03	5.62		-1.28325	-3.08869	-5.72885
2013-07-30 08:12:20	3.03	5.62		-1.27631	-3.08869	-5.72885
2013-07-30 08:22:20	3.05	5.64		-1.26936	-3.10907	-5.74924
2013-07-30 08:32:20	3.08	5.67		-1.26242	-3.13965	-5.77982
2013-07-30 08:42:20	3.1	5.69		-1.25548	-3.16004	-5.8002
2013-07-30 08:52:20	3.12	5.71		-1.24853	-3.18043	-5.82059
2013-07-30 09:02:20	3.13	5.73		-1.24159	-3.19062	-5.84098
2013-07-30 09:12:20	3.17	5.74		-1.23464	-3.2314	-5.85117
2013-07-30 09:22:20	3.17	5.75		-1.2277	-3.2314	-5.86137
2013-07-30 09:32:20	3.18	5.77		-1.22075	-3.24159	-5.88175
2013-07-30 09:42:20	3.21	5.79		-1.21381	-3.27217	-5.90214
2013-07-30 09:52:20	3.22	5.8		-1.20686	-3.28236	-5.91233
2013-07-30 10:02:20	1.75	4.33		-1.19992	-1.78389	-4.41386
2013-07-30 10:12:20	1.84	4.43		-1.19298	-1.87564	-4.5158
2013-07-30 10:22:20	1.88	4.47		-1.18603	-1.91641	-4.55657
2013-07-30 10:32:20	1.51	4.1		-1.17909	-1.53925	-4.17941
2013-07-30 10:42:20	1.56	4.15		-1.17214	-1.59021	-4.23038
2013-07-30 10:52:20	1.58	4.16		-1.1652	-1.6106	-4.24057
2013-07-30 11:02:20	1.61	4.19		-1.15825	-1.64118	-4.27115
2013-07-30 11:12:20	1.63	4.22		-1.15131	-1.66157	-4.30173
2013-07-30 11:22:20	1.64	4.22		-1.14436	-1.67176	-4.30173
2013-07-30 11:32:20	1.66	4.24		-1.13742	-1.69215	-4.32212
2013-07-30 11:42:20	1.68	4.26		-1.13048	-1.71254	-4.34251
2013-07-30 11:52:20	1.67	4.25		-1.12353	-1.70234	-4.33231
2013-07-30 12:02:20	1.69	4.25		-1.11659	-1.72273	-4.33231
2013-07-30 12:12:20	1.68	4.26		-1.10964	-1.71254	-4.34251
2013-07-30 12:22:20	1.68	4.25		-1.1027	-1.71254	-4.33231
2013-07-30 12:32:20	1.7	4.28		-1.09575	-1.73293	-4.3629
2013-07-30 12:42:20	1.71	4.29		-1.08881	-1.74312	-4.37309
2013-07-30 12:52:20	1.71	4.28		-1.08186	-1.74312	-4.3629
2013-07-30 13:02:20	1.73	4.3		-1.07492	-1.76351	-4.38328
2013-07-30 13:12:20	1.74	4.31		-1.06798	-1.7737	-4.39348
2013-07-30 13:22:20	1.75	4.33		-1.06103	-1.78389	-4.41386
2013-07-30 13:32:20	1.76	4.34		-1.05409	-1.79409	-4.42406
2013-07-30 13:42:20	1.78	4.34		-1.04714	-1.81448	-4.42406
2013-07-30 13:52:20	1.8	4.36		-1.0402	-1.83486	-4.44444
2013-07-30 14:02:20	1.8	4.38		-1.03325	-1.83486	-4.46483
2013-07-30 14:12:20	1.81	4.39		-1.02631	-1.84506	-4.47503
2013-07-30 14:22:20	1.82	4.38		-1.01936	-1.85525	-4.46483
2013-07-30 14:32:20	1.84	4.41		-1.01242	-1.87564	-4.49541
2013-07-30 14:42:20	1.82	4.39		-1.00548	-1.85525	-4.47503
2013-07-30 14:52:20	1.83	4.41		-0.998531	-1.86544	-4.49541
2013-07-30 15:02:20	1.85	4.41		-0.991587	-1.88583	-4.49541
2013-07-30 15:12:20	1.85	4.42		-0.984642	-1.88583	-4.50561
2013-07-30 15:22:20	1.87	4.44		-0.977698	-1.90622	-4.52599
2013-07-30 15:32:20	1.88	4.45		-0.970753	-1.91641	-4.53619
2013-07-30 15:42:20	1.88	4.47		-0.963809	-1.91641	-4.55657
2013-07-30 15:52:20	1.9	4.46		-0.956865	-1.9368	-4.54638
2013-07-30 16:02:20	1.92	4.49		-0.94992	-1.95719	-4.57696
2013-07-30 16:12:20	1.93	4.49		-0.942976	-1.96738	-4.57696
2013-07-30 16:22:20	1.93	4.51		-0.936031	-1.96738	-4.59735
2013-07-30 16:32:20	1.95	4.51		-0.929087	-1.98777	-4.59735
2013-07-30 16:42:20	1.96	4.52		-0.922142	-1.99796	-4.60754
2013-07-30 16:52:20	1.97	4.54		-0.915198	-2.00815	-4.62793
2013-07-30 17:02:20	1.97	4.55		-0.908253	-2.00815	-4.63812
2013-07-30 17:12:20	1.98	4.56		-0.901309	-2.01835	-4.64832
2013-07-30 17:22:20	2	4.57		-0.894365	-2.03874	-4.65851
2013-07-30 17:32:20	2.01	4.58		-0.88742	-2.04893	-4.66871
2013-07-30 17:42:20	2.02	4.59		-0.880476	-2.05912	-4.6789
2013-07-30 17:52:20	2.02	4.58		-0.873531	-2.05912	-4.66871
2013-07-30 18:02:20	2.02	4.6		-0.866587	-2.05912	-4.68909
2013-07-30 18:12:20	2.04	4.6		-0.859642	-2.07951	-4.68909
2013-07-30 18:22:20	2.05	4.61		-0.852698	-2.0897	-4.69929
2013-07-30 18:32:20	2.05	4.62		-0.845753	-2.0897	-4.70948
2013-07-30 18:42:20	2.06	4.63		-0.838809	-2.0999	-4.71967
2013-07-30 18:52:20	2.07	4.65		-0.831865	-2.11009	-4.74006
2013-07-30 19:02:20	2.08	4.66		-0.82492	-2.12029	-4.75025
2013-07-30 19:12:20	2.09	4.67		-0.817976	-2.13048	-4.76045
2013-07-30 19:22:20	2.11	4.68		-0.811031	-2.15087	-4.77064
2013-07-30 19:32:20	2.11	4.68		-0.804087	-2.15087	-4.77064
2013-07-30 19:42:20	2.11	4.68		-0.797142	-2.15087	-4.77064
2013-07-30 19:52:20	2.12	4.7		-0.790198	-2.16106	-4.79103
2013-07-30 20:02:20	2.13	4.71		-0.783253	-2.17125	-4.80122
2013-07-30 20:12:20	2.13	4.7		-0.776309	-2.17125	-4.79103
2013-07-30 20:22:20	2.15	4.72		-0.769365	-2.19164	-4.81142
2013-07-30 20:32:20	2.16	4.73		-0.76242	-2.20183	-4.82161
2013-07-30 20:42:20	2.17	4.73		-0.755476	-2.21203	-4.82161
2013-07-30 20:52:20	2.18	4.74		-0.748531	-2.22222	-4.8318
2013-07-30 21:02:20	2.2	4.76		-0.741587	-2.24261	-4.85219
2013-07-30 21:12:20	2.18	4.75		-0.734642	-2.22222	-4.842
2013-07-30 21:22:20	2.21	4.77		-0.727698	-2.2528	-4.86239
2013-07-30 21:32:20	2.22	4.78		-0.720753	-2.263	-4.87258
2013-07-30 21:42:20	2.23	4.8		-0.713809	-2.27319	-4.89297
2013-07-30 21:52:20	2.24	4.8		-0.706865	-2.28338	-4.89297
2013-07-30 22:02:20	2.23	4.8		-0.69992	-2.27319	-4.89297
2013-07-30 22:12:20	2.24	4.81		-0.692976	-2.28338	-4.90316
2013-07-30 22:22:20	2.26	4.83		-0.686031	-2.30377	-4.92355
2013-07-30 22:32:20	2.28	4.84		-0.679087	-2.32416	-4.93374
2013-07-30 22:42:20	2.28	4.84		-0.672142	-2.32416	-4.93374
2013-07-30 22:52:20	2.3	4.85		-0.665198	-2.34455	-4.94393
2013-07-30 23:02:20	2.3	4.86		-0.658253	-2.34455	-4.95413
2013-07-30 23:12:20	2.32	4.88		-0.651309	-2.36493	-4.97452
2013-07-30 23:22:20	2.33	4.89		-0.644365	-2.37513	-4.98471
2013-07-30 23:32:20	2.33	4.89		-0.63742	-2.37513	-4.98471
2013-07-30 23:42:20	2.35	4.91		-0.630476	-2.39551	-5.0051
2013-07-30 23:52:20	2.36	4.92		-0.623531	-2.40571	-5.01529
2013-07-31 00:02:20	2.38	4.94		-0.616587	-2.4261	-5.03568
2013-07-31 00:12:20	2.38	4.95		-0.609642	-2.4261	-5.04587
2013-07-31 00:22:20	2.4	4.95		-0.602698	-2.44648	-5.04587
2013-07-31 00:32:20	2.4	4.97		-0.595753	-2.44648	-5.06626
2013-07-31 00:42:20	2.43	4.99		-0.588809	-2.47706	-5.08665
2013-07-31 00:52:20	2.43	4.99		-0.581865	-2.47706	-5.08665
2013-07-31 01:02:20	2.46	5.02		-0.57492	-2.50765	-5.11723
2013-07-31 01:12:20	2.46	5.02		-0.567976	-2.50765	-5.11723
2013-07-31 01:22:20	2.47	5.03		-0.561031	-2.51784	-5.12742
2013-07-31 01:32:20	2.48	5.04		-0.554087	-2.52803	-5.13761
2013-07-31 01:42:20	2.49	5.05		-0.547142	-2.53823	-5.14781
2013-07-31 01:52:20	2.49	5.05		-0.540198	-2.53823	-5.14781
2013-07-31 02:02:20	2.51	5.07		-0.533253	-2.55861	-5.1682
2013-07-31 02:12:20	2.52	5.08		-0.526309	-2.56881	-5.17839
2013-07-31 02:22:20	2.54	5.1		-0.519365	-2.58919	-5.19878
2013-07-31 02:32:20	2.54	5.11		-0.51242	-2.58919	-5.20897
2013-07-31 02:42:20	2.56	5.12		-0.505476	-2.60958	-5.21916
2013-07-31 02:52:20	2.57	5.13		-0.498531	-2.61978	-5.22936
2013-07-31 03:02:20	2.58	5.14		-0.491587	-2.62997	-5.23955
2013-07-31 03:12:20	2.6	5.15		-0.484642	-2.65036	-5.24975
2013-07-31 03:22:20	2.61	5.16		-0.477698	-2.66055	-5.25994
2013-07-31 03:32:20	2.62	5.18		-0.470753	-2.67074	-5.28033
2013-07-31 03:42:20	2.65	5.2		-0.463809	-2.70133	-5.30071
2013-07-31 03:52:20	2.65	5.2		-0.456865	-2.70133	-5.30071
2013-07-31 04:02:20	2.66	5.22		-0.44992	-2.71152	-5.3211
2013-07-31 04:12:20	2.69	5.25		-0.442976	-2.7421	-5.35168
2013-07-31 04:22:20	2.7	5.25		-0.436031	-2.75229	-5.35168
2013-07-31 04:32:20	2.69	5.24		-0.429087	-2.7421	-5.34149
2013-07-31 04:42:20	2.71	5.26		-0.422142	-2.76249	-5.36188
2013-07-31 04:52:20	2.73	5.29		-0.415198	-2.78287	-5.39246
2013-07-31 05:02:20	2.74	5.29		-0.408253	-2.79307	-5.39246
2013-07-31 05:12:20	2.76	5.31		-0.401309	-2.81346	-5.41284
2013-07-31 05:22:20	2.76	5.31		-0.394365	-2.81346	-5.41284
2013-07-31 05:32:20	2.79	5.33		-0.38742	-2.84404	-5.43323
2013-07-31 05:42:20	2.79	5.35		-0.380476	-2.84404	-5.45362
2013-07-31 05:52:20	2.82	5.37		-0.373531	-2.87462	-5.47401
2013-07-31 06:02:20	2.84	5.38		-0.366587	-2.89501	-5.4842
2013-07-31 06:12:20	2.85	5.41		-0.359642	-2.9052	-5.51478
2013-07-31 06:22:20	2.87	5.42		-0.352698	-2.92559	-5.52497
2013-07-31 06:32:20	2.88	5.44		-0.345753	-2.93578	-5.54536
2013-07-31 06:42:20	2.9	5.45		-0.338809	-2.95617	-5.55556
2013-07-31 06:52:20	2.92	5.47		-0.331865	-2.97655	-5.57594
2013-07-31 07:02:20	2.93	5.47		-0.32492	-2.98675	-5.57594
2013-07-31 07:12:20	2.94	5.49		-0.317976	-2.99694	-5.59633
2013-07-31 07:22:20	2.92	5.47		-0.311031	-2.97655	-5.57594
2013-07-31 07:32:20	2.94	5.49		-0.304087	-2.99694	-5.59633
2013-07-31 07:42:20	2.96	5.51		-0.297142	-3.01733	-5.61672
2013-07-31 07:52:20	2.98	5.53		-0.290198	-3.03772	-5.6371
2013-07-31 08:02:20	2.99	5.54		-0.283253	-3.04791	-5.6473
2013-07-31 08:12:20	3.02	5.57		-0.276309	-3.07849	-5.67788
2013-07-31 08:22:20	3.03	5.57		-0.269365	-3.08869	-5.67788
2013-07-31 08:32:20	3.04	5.59		-0.26242	-3.09888	-5.69827
2013-07-31 08:42:20	3.06	5.61		-0.255476	-3.11927	-5.71865
2013-07-31 08:52:20	3.08	5.62		-0.248531	-3.13965	-5.72885
2013-07-31 09:02:20	1.68	4.22		-0.241587	-1.71254	-4.30173
2013-07-31 09:12:20	1.69	4.24		-0.234642	-1.72273	-4.32212
2013-07-31 09:22:20	1.76	4.29		-0.227698	-1.79409	-4.37309
2013-07-31 09:32:20	1.76	4.32		-0.220753	-1.79409	-4.40367
2013-07-31 09:42:20	1.81	4.35		-0.213809	-1.84506	-4.43425
2013-07-31 09:52:20	1.82	4.37		-0.206865	-1.85525	-4.45464
2013-07-31 10:02:20	1.83	4.38		-0.19992	-1.86544	-4.46483
2013-07-31 10:12:20	1.86	4.41		-0.192976	-1.89602	-4.49541
2013-07-31 10:22:20	1.89	4.43		-0.186031	-1.92661	-4.5158
2013-07-31 10:32:20	1.9	4.44		-0.179087	-1.9368	-4.52599
2013-07-31 10:42:20	1.92	4.46		-0.172142	-1.95719	-4.54638
2013-07-31 10:52:20	1.4	3.95		-0.165198	-1.42712	-4.0265
2013-07-31 11:02:20	1.5	4.04		-0.158253	-1.52905	-4.11825
2013-07-31 11:12:20	1.56	4.11		-0.151309	-1.59021	-4.1896
2013-07-31 11:22:20	1.64	4.19		-0.144365	-1.67176	-4.27115
2013-07-31 11:32:20	1.71	4.26		-0.13742	-1.74312	-4.34251
2013-07-31 11:42:20	1.75	4.28		-0.130476	-1.78389	-4.3629
2013-07-31 11:52:20	1.79	4.32		-0.123531	-1.82467	-4.40367
2013-07-31 12:02:20	1.84	4.39		-0.116587	-1.87564	-4.47503
2013-07-31 12:12:20	1.89	4.43		-0.109642	-1.92661	-4.5158
2013-07-31 12:22:20	1.94	4.48		-0.102698	-1.97757	-4.56677
2013-07-31 12:32:20	1.97	4.51		-0.0957534	-2.00815	-4.59735
2013-07-31 12:42:20	1.97	4.51		-0.088809	-2.00815	-4.59735
2013-07-31 12:52:20	2.01	4.56		-0.0818645	-2.04893	-4.64832
2013-07-31 13:02:20	2.05	4.59		-0.0749201	-2.0897	-4.6789
2013-07-31 13:12:20	2.1	4.64		-0.0679756	-2.14067	-4.72987
2013-07-31 13:22:20	2.15	4.68		-0.0610312	-2.19164	-4.77064
2013-07-31 13:32:20	2.19	4.73		-0.0540867	-2.23242	-4.82161
2013-07-31 13:42:20	1.88	4.41		-0.0471423	-1.91641	-4.49541
2013-07-31 13:52:20	1.87	4.41		-0.0401978	-1.90622	-4.49541
2013-07-31 14:02:20	1.86	4.4		-0.0332534	-1.89602	-4.48522
2013-07-31 14:12:20	1.86	4.4		-0.026309	-1.89602	-4.48522
2013-07-31 14:22:20	1.87	4.42		-0.0193645	-1.90622	-4.50561
2013-07-31 14:32:20	1.85	4.4		-0.0124201	-1.88583	-4.48522
2013-07-31 14:42:20	1.86	4.4		-0.00547562	-1.89602	-4.48522
2013-07-31 14:46:40	1.87	4.4		-0.00246962	-1.90622	-4.48522
2013-07-31 14:47:40	1.87	4.41		-0.00177517	-1.90622	-4.49541
2013-07-31 14:49:15	1.87	4.42		-0.000674552	-1.90622	-4.50561
2013-07-31 14:50:15	2.54	4.86		1.98929e-05	-2.58919	-4.95413
2013-07-31 14:56:15	2.03	4.54		0.00418656	-2.06932	-4.62793
2013-07-31 14:57:15	1.85	4.45		0.004881	-1.88583	-4.53619
2013-07-31 14:58:15	1.93	4.51		0.00557545	-1.96738	-4.59735
2013-07-31 14:59:15	1.97	4.54		0.00626989	-2.00815	-4.62793	2013-07-31 14:59:15
2013-07-31 15:00:15	1.99	4.56		0.00696434	-2.02854	-4.64832
2013-07-31 15:01:15	2	4.56		0.00765878	-2.03874	-4.64832
2013-07-31 15:02:15	2.01	4.57		0.00835323	-2.04893	-4.65851
2013-07-31 15:03:15	2.02	4.57		0.00904767	-2.05912	-4.65851
2013-07-31 15:04:15	2	4.56		0.00974212	-2.03874	-4.64832
2013-07-31 15:05:15	2.01	4.56		0.0104366	-2.04893	-4.64832
2013-07-31 15:06:15	2.02	4.57		0.011131	-2.05912	-4.65851
2013-07-31 15:07:15	2.02	4.58		0.0118254	-2.05912	-4.66871
2013-07-31 15:08:15	2.02	4.57		0.0125199	-2.05912	-4.65851
2013-07-31 15:09:15	2.03	4.58		0.0132143	-2.06932	-4.66871
2013-07-31 15:10:15	2.03	4.57		0.0139088	-2.06932	-4.65851
2013-07-31 15:11:15	2.03	4.58		0.0146032	-2.06932	-4.66871
2013-07-31 15:12:15	2.03	4.58		0.0152977	-2.06932	-4.66871
2013-07-31 15:13:15	2.04	4.58		0.0159921	-2.07951	-4.66871
2013-07-31 15:14:15	2.01	4.55		0.0166866	-2.04893	-4.63812
2013-07-31 15:15:15	2.02	4.55		0.017381	-2.05912	-4.63812
2013-07-31 15:16:15	2.02	4.57		0.0180754	-2.05912	-4.65851
2013-07-31 15:17:15	2.04	4.58		0.0187699	-2.07951	-4.66871
2013-07-31 15:18:15	2.03	4.58		0.0194643	-2.06932	-4.66871
2013-07-31 15:19:15	2.04	4.59		0.0201588	-2.07951	-4.6789
2013-07-31 15:20:15	2.04	4.58		0.0208532	-2.07951	-4.66871
2013-07-31 15:21:15	2.06	4.58		0.0215477	-2.0999	-4.66871
2013-07-31 15:22:15	2.07	4.58		0.0222421	-2.11009	-4.66871
2013-07-31 15:23:15	2.07	4.59		0.0229366	-2.11009	-4.6789
2013-07-31 15:24:15	2.08	4.59		0.023631	-2.12029	-4.6789
2013-07-31 15:25:15	2.09	4.6		0.0243254	-2.13048	-4.68909
2013-07-31 15:26:15	2.08	4.6		0.0250199	-2.12029	-4.68909
2013-07-31 15:27:15	2.09	4.61		0.0257143	-2.13048	-4.69929
2013-07-31 15:28:15	2.1	4.61		0.0264088	-2.14067	-4.69929
2013-07-31 15:29:15	2.1	4.62		0.0271032	-2.14067	-4.70948
2013-07-31 15:31:15	2.11	4.63		0.0284921	-2.15087	-4.71967
2013-07-31 15:32:15	2.11	4.63		0.0291866	-2.15087	-4.71967
2013-07-31 15:33:15	2.11	4.63		0.029881	-2.15087	-4.71967
2013-07-31 15:34:15	2.12	4.64		0.0305754	-2.16106	-4.72987
2013-07-31 15:35:15	2.13	4.65		0.0312699	-2.17125	-4.74006
2013-07-31 15:37:15	2.14	4.66		0.0326588	-2.18145	-4.75025
2013-07-31 15:38:15	2.14	4.65		0.0333532	-2.18145	-4.74006
2013-07-31 15:39:15	2.15	4.66		0.0340477	-2.19164	-4.75025
2013-07-31 15:40:15	2.15	4.66		0.0347421	-2.19164	-4.75025
2013-07-31 15:41:15	2.15	4.67		0.0354366	-2.19164	-4.76045
2013-07-31 15:42:15	2.16	4.68		0.036131	-2.20183	-4.77064
2013-07-31 15:43:15	2.16	4.67		0.0368254	-2.20183	-4.76045
2013-07-31 15:44:15	2.16	4.68		0.0375199	-2.20183	-4.77064
2013-07-31 15:45:15	2.18	4.68		0.0382143	-2.22222	-4.77064
2013-07-31 15:46:15	2.17	4.69		0.0389088	-2.21203	-4.78084
2013-07-31 15:47:15	2.17	4.69		0.0396032	-2.21203	-4.78084
2013-07-31 15:48:15	2.19	4.71		0.0402977	-2.23242	-4.80122
2013-07-31 15:49:15	2.19	4.7		0.0409921	-2.23242	-4.79103	2013-07-31 15:49:15
2013-07-31 16:09:15	2.24	4.74		0.054881	-2.28338	-4.8318
2013-07-31 16:19:15	2.27	4.78		0.0618254	-2.31397	-4.87258
2013-07-31 16:29:15	2.31	4.82		0.0687699	-2.35474	-4.91335
2013-07-31 16:39:15	2.36	4.87		0.0757143	-2.40571	-4.96432
2013-07-31 16:49:15	2.4	4.91		0.0826588	-2.44648	-5.0051
2013-07-31 16:59:15	2.42	4.94		0.0896032	-2.46687	-5.03568	2013-07-31 16:59:15
2013-07-31 17:09:15	2.43	4.94		0.0965477	-2.47706	-5.03568
2013-07-31 17:19:15	2.48	4.98		0.103492	-2.52803	-5.07645
2013-07-31 17:29:15	2.51	5.03		0.110437	-2.55861	-5.12742
2013-07-31 17:39:15	2.57	5.08		0.117381	-2.61978	-5.17839
2013-07-31 17:49:15	2.6	5.11		0.124325	-2.65036	-5.20897
2013-07-31 17:59:15	2.65	5.17		0.13127	-2.70133	-5.27013	2013-07-31 17:59:15
2013-07-31 18:09:15	2.53	5.05		0.138214	-2.579	-5.14781
2013-07-31 18:19:15	2.6	5.11		0.145159	-2.65036	-5.20897
2013-07-31 18:29:15	2.67	5.18		0.152103	-2.72171	-5.28033
2013-07-31 18:39:15	2.71	5.22		0.159048	-2.76249	-5.3211
2013-07-31 18:49:15	2.77	5.29		0.165992	-2.82365	-5.39246
2013-07-31 18:59:15	2.83	5.33		0.172937	-2.88481	-5.43323	2013-07-31 18:59:15
2013-07-31 19:09:15	2.87	5.38		0.179881	-2.92559	-5.4842
2013-07-31 19:19:15	2.91	5.42		0.186825	-2.96636	-5.52497
2013-07-31 19:29:15	3	5.5		0.19377	-3.0581	-5.60652
2013-07-31 19:39:15	3.07	5.57		0.200714	-3.12946	-5.67788
2013-07-31 19:49:15	3.16	5.67		0.207659	-3.2212	-5.77982
2013-07-31 19:59:15	3.21	5.72		0.214603	-3.27217	-5.83078	2013-07-31 19:59:15
2013-07-31 20:09:15	3.26	5.77		0.221548	-3.32314	-5.88175
2013-07-31 20:19:15	3.29	5.79		0.228492	-3.35372	-5.90214
2013-07-31 20:29:15	3.31	5.81		0.235437	-3.37411	-5.92253
2013-07-31 20:39:15	3.32	5.83		0.242381	-3.3843	-5.94292
2013-07-31 20:49:15	3.27	5.78		0.249325	-3.33333	-5.89195
2013-07-31 20:59:15	3.29	5.8		0.25627	-3.35372	-5.91233	2013-07-31 20:59:15
2013-07-31 21:09:15	3.31	5.82		0.263214	-3.37411	-5.93272
2013-07-31 21:19:15	3.1	5.62		0.270159	-3.16004	-5.72885
2013-07-31 21:29:15	3.2	5.7		0.277103	-3.26198	-5.8104
2013-07-31 21:39:15	3.29	5.81		0.284048	-3.35372	-5.92253
2013-07-31 21:49:15	3.37	5.88		0.290992	-3.43527	-5.99388
2013-07-31 21:59:15	3.43	5.94		0.297937	-3.49643	-6.05505	2013-07-31 21:59:15
2013-07-31 22:09:15	3.5	6.01		0.304881	-3.56779	-6.1264
2013-07-31 22:19:15	3.51	6.01		0.311825	-3.57798	-6.1264
2013-07-31 22:29:15	3.58	6.08		0.31877	-3.64934	-6.19776
2013-07-31 22:39:15	3.6	6.12		0.325714	-3.66972	-6.23853
2013-07-31 22:49:15	3.69	6.19		0.332659	-3.76147	-6.30989
2013-07-31 22:59:15	3.75	6.25		0.339603	-3.82263	-6.37105	2013-07-31 22:59:15
2013-07-31 23:09:15	3.82	6.33		0.346548	-3.89399	-6.4526
2013-07-31 23:19:15	3.88	6.39		0.353492	-3.95515	-6.51376
2013-07-31 23:29:15	3.94	6.44		0.360437	-4.01631	-6.56473
2013-07-31 23:39:15	3.99	6.49		0.367381	-4.06728	-6.6157
2013-07-31 23:49:15	4.07	6.58		0.374325	-4.14883	-6.70744
2013-07-31 23:59:15	4.14	6.66		0.38127	-4.22018	-6.78899	2013-07-31 23:59:15
2013-08-01 00:09:15	4.2	6.72		0.388214	-4.28135	-6.85015
2013-08-01 00:19:15	4.3	6.8		0.395159	-4.38328	-6.9317
2013-08-01 00:29:15	4.36	6.87		0.402103	-4.44444	-7.00306
2013-08-01 00:39:15	4.43	6.93		0.409048	-4.5158	-7.06422
2013-08-01 00:49:15	4.51	7.01		0.415992	-4.59735	-7.14577
2013-08-01 00:59:15	4.61	7.11		0.422937	-4.69929	-7.24771	2013-08-01 00:59:15
2013-08-01 01:09:15	4.59	7.1		0.429881	-4.6789	-7.23751
2013-08-01 01:19:15	4.69	7.19		0.436825	-4.78084	-7.32926
2013-08-01 01:29:15	4.64	7.14		0.44377	-4.72987	-7.27829
2013-08-01 01:39:15	4.75	7.26		0.450714	-4.842	-7.40061
2013-08-01 01:49:15	4.82	7.34		0.457659	-4.91335	-7.48216
2013-08-01 01:59:15	4.85	7.37		0.464603	-4.94393	-7.51274	2013-08-01 01:59:15
2013-08-01 02:09:15	4.97	7.47		0.471548	-5.06626	-7.61468
2013-08-01 02:19:15	5.03	7.53		0.478492	-5.12742	-7.67584
2013-08-01 02:29:15	5.11	7.62		0.485437	-5.20897	-7.76758
2013-08-01 02:39:15	5.17	7.69		0.492381	-5.27013	-7.83894
2013-08-01 02:49:15	5.23	7.75		0.499325	-5.33129	-7.9001
2013-08-01 02:59:15	5.28	7.8		0.50627	-5.38226	-7.95107	2013-08-01 02:59:15
2013-08-01 03:09:15	5.37	7.88		0.513214	-5.47401	-8.03262
2013-08-01 03:19:15	5.42	7.93		0.520159	-5.52497	-8.08359
2013-08-01 03:29:15	5.47	7.97		0.527103	-5.57594	-8.12436
2013-08-01 03:39:15	5.54	8.05		0.534048	-5.6473	-8.20591
2013-08-01 03:49:15	5.25	7.76		0.540992	-5.35168	-7.9103
2013-08-01 03:59:15	5.4	7.91		0.547937	-5.50459	-8.0632	2013-08-01 03:59:15
2013-08-01 04:09:15	5.54	8.05		0.554881	-5.6473	-8.20591
2013-08-01 04:19:15	5.65	8.15		0.561825	-5.75943	-8.30785
2013-08-01 04:29:15	5.74	8.25		0.56877	-5.85117	-8.40979
2013-08-01 04:39:15	5.81	8.31		0.575714	-5.92253	-8.47095
2013-08-01 04:49:15	5.85	8.36		0.582659	-5.9633	-8.52192
2013-08-01 04:59:15	5.9	8.4		0.589603	-6.01427	-8.56269	2013-08-01 04:59:15
2013-08-01 05:09:15	5.97	8.48		0.596548	-6.08563	-8.64424
2013-08-01 05:19:15	6.02	8.53		0.603492	-6.1366	-8.69521
2013-08-01 05:29:15	5.89	8.39		0.610437	-6.00408	-8.5525
2013-08-01 05:39:15	6.02	8.52		0.617381	-6.1366	-8.68502
2013-08-01 05:49:15	6.07	8.57		0.624325	-6.18756	-8.73598
2013-08-01 05:59:15	6.08	8.59		0.63127	-6.19776	-8.75637	2013-08-01 05:59:15
2013-08-01 06:09:15	6.14	8.65		0.638214	-6.25892	-8.81753
2013-08-01 06:19:15	6.22	8.73		0.645159	-6.34047	-8.89908
2013-08-01 06:29:15	6.28	8.78		0.652103	-6.40163	-8.95005
2013-08-01 06:39:15	6.3	8.81		0.659048	-6.42202	-8.98063
2013-08-01 06:49:15	6.38	8.89		0.665992	-6.50357	-9.06218
2013-08-01 06:59:15	6.44	8.95		0.672937	-6.56473	-9.12334	2013-08-01 06:59:15
2013-08-01 07:09:15	6.43	8.93		0.679881	-6.55454	-9.10296
2013-08-01 07:19:15	6.41	8.91		0.686825	-6.53415	-9.08257
2013-08-01 07:29:15	6.46	8.96		0.69377	-6.58512	-9.13354
2013-08-01 07:39:15	6.08	8.6		0.700714	-6.19776	-8.76656
2013-08-01 07:49:15	6.03	8.53		0.707659	-6.14679	-8.69521
2013-08-01 07:59:15	6.16	8.68		0.714603	-6.27931	-8.84811	2013-08-01 07:59:15
2013-08-01 08:19:15	6.4	8.91		0.728492	-6.52396	-9.08257
2013-08-01 08:29:15	6.46	8.97		0.735437	-6.58512	-9.14373
2013-08-01 08:39:15	6.48	9		0.742381	-6.6055	-9.17431
2013-08-01 08:49:15	6.57	9.08		0.749325	-6.69725	-9.25586
2013-08-01 08:59:15	6.62	9.14		0.75627	-6.74822	-9.31702
2013-08-01 09:09:15	6.72	9.24		0.763214	-6.85015	-9.41896	2013-08-01 09:09:15
2013-08-01 09:19:15	6.75	9.26		0.770159	-6.88073	-9.43935
2013-08-01 09:29:15	6.63	9.15		0.777103	-6.75841	-9.32722
2013-08-01 09:39:15	6.65	9.16		0.784048	-6.7788	-9.33741
2013-08-01 09:49:15	6.75	9.26		0.790992	-6.88073	-9.43935
2013-08-01 09:59:15	6.79	9.31		0.797937	-6.92151	-9.49032
2013-08-01 10:09:15	6.84	9.35		0.804881	-6.97248	-9.53109	2013-08-01 10:09:15
2013-08-01 10:19:15	6.92	9.43		0.811825	-7.05403	-9.61264
2013-08-01 10:29:15	6.96	9.47		0.81877	-7.0948	-9.65341
2013-08-01 10:39:15	7	9.52		0.825714	-7.13558	-9.70438
2013-08-01 10:49:15	7.06	9.57		0.832659	-7.19674	-9.75535
2013-08-01 10:59:15	7.12	9.61		0.839603	-7.2579	-9.79613
2013-08-01 11:09:15	6.99	9.49		0.846548	-7.12538	-9.6738	2013-08-01 11:09:15
2013-08-01 11:19:15	7.12	9.63		0.853492	-7.2579	-9.81651
2013-08-01 11:29:15	7.15	9.66		0.860437	-7.28848	-9.84709
2013-08-01 11:39:15	7.25	9.74		0.867381	-7.39042	-9.92864
2013-08-01 11:49:15	7.31	9.81		0.874325	-7.45158	-10
2013-08-01 11:59:15	7.36	9.87		0.88127	-7.50255	-10.0612
2013-08-01 12:09:15	7.39	9.9		0.888214	-7.53313	-10.0917	2013-08-01 12:09:15
2013-08-01 12:19:15	7.46	9.96		0.895159	-7.60449	-10.1529
2013-08-01 12:29:15	7.49	10		0.902103	-7.63507	-10.1937
2013-08-01 12:39:15	7.56	10.06		0.909048	-7.70642	-10.2548
2013-08-01 12:49:15	7.6	10.1		0.915992	-7.7472	-10.2956
2013-08-01 12:59:15	7.38	9.9		0.922937	-7.52294	-10.0917
2013-08-01 13:09:15	7.55	10.06		0.929881	-7.69623	-10.2548	2013-08-01 13:09:15
2013-08-01 13:19:15	7.59	10.09		0.936825	-7.737	-10.2854
2013-08-01 13:29:15	7.39	9.89		0.94377	-7.53313	-10.0815
2013-08-01 13:39:15	7.55	10.06		0.950714	-7.69623	-10.2548
2013-08-01 13:49:15	7.65	10.15		0.957659	-7.79817	-10.3466
2013-08-01 13:59:15	7.65	10.16		0.964603	-7.79817	-10.3568
2013-08-01 14:09:15	7.69	10.19		0.971548	-7.83894	-10.3874	2013-08-01 14:09:15
2013-08-01 14:19:15	7.73	10.22		0.978492	-7.87971	-10.4179
2013-08-01 14:29:15	7.83	10.32		0.985437	-7.98165	-10.5199
2013-08-01 14:39:15	7.88	10.38		0.992381	-8.03262	-10.581
2013-08-01 14:49:15	7.96	10.45		0.999325	-8.11417	-10.6524
2013-08-01 14:59:15	8.02	10.51		1.00627	-8.17533	-10.7136
2013-08-01 15:09:15	8.06	10.56		1.01321	-8.21611	-10.7645	2013-08-01 15:09:15
2013-08-01 15:19:15	8.09	10.59		1.02016	-8.24669	-10.7951
2013-08-01 15:29:15	8.19	10.68		1.0271	-8.34862	-10.8869
2013-08-01 15:39:15	8.24	10.73		1.03405	-8.39959	-10.9378
2013-08-01 15:49:15	8.28	10.77		1.04099	-8.44037	-10.9786
2013-08-01 15:59:15	8.32	10.81		1.04794	-8.48114	-11.0194
2013-08-01 16:09:15	8.28	10.77		1.05488	-8.44037	-10.9786	2013-08-01 16:09:15
2013-08-01 16:19:15	8.38	10.87		1.06183	-8.5423	-11.0805
2013-08-01 16:29:15	8.45	10.96		1.06877	-8.61366	-11.1723
2013-08-01 16:39:15	8.52	11.02		1.07571	-8.68502	-11.2334
2013-08-01 16:49:15	8.55	11.05		1.08266	-8.7156	-11.264
2013-08-01 16:59:15	8.62	11.11		1.0896	-8.78695	-11.3252
2013-08-01 17:09:15	8.69	11.18		1.09655	-8.85831	-11.3965	2013-08-01 17:09:15
2013-08-01 17:19:15	8.71	11.21		1.10349	-8.8787	-11.4271
2013-08-01 17:29:15	8.73	11.23		1.11044	-8.89908	-11.4475
2013-08-01 17:39:15	8.82	11.32		1.11738	-8.99083	-11.5392
2013-08-01 17:49:15	8.62	11.04		1.12433	-8.78695	-11.2538
2013-08-01 17:59:15	8.83	11.32		1.13127	-9.00102	-11.5392
2013-08-01 18:09:15	8.7	11.19		1.13821	-8.8685	-11.4067	2013-08-01 18:09:15
2013-08-01 18:19:15	8.85	11.35		1.14516	-9.02141	-11.5698
2013-08-01 18:29:15	8.87	11.37		1.1521	-9.04179	-11.5902
2013-08-01 18:39:15	8.94	11.43		1.15905	-9.11315	-11.6514
2013-08-01 18:49:15	8.99	11.49		1.16599	-9.16412	-11.7125
2013-08-01 18:59:15	9.07	11.56		1.17294	-9.24567	-11.7839
2013-08-01 19:09:15	9.09	11.58		1.17988	-9.26606	-11.8043	2013-08-01 19:09:15
2013-08-01 19:19:15	9.11	11.61		1.18683	-9.28644	-11.8349
2013-08-01 19:29:15	9.17	11.67		1.19377	-9.3476	-11.896
2013-08-01 19:39:15	9.25	11.74		1.20071	-9.42915	-11.9674
2013-08-01 19:49:15	9.2	11.7		1.20766	-9.37819	-11.9266
2013-08-01 19:59:15	9.26	11.76		1.2146	-9.43935	-11.9878
2013-08-01 20:09:15	9.31	11.8		1.22155	-9.49032	-12.0285	2013-08-01 20:09:15
2013-08-01 20:19:15	9.15	11.65		1.22849	-9.32722	-11.8756
2013-08-01 20:29:15	9.3	11.8		1.23544	-9.48012	-12.0285
2013-08-01 20:49:15	9.09	11.64		1.24933	-9.26606	-11.8654
2013-08-01 20:59:15	9.25	11.78		1.25627	-9.42915	-12.0082
2013-08-01 21:09:15	9.36	11.89		1.26321	-9.54128	-12.1203
2013-08-01 21:19:15	9.45	11.97		1.27016	-9.63303	-12.2018	2013-08-01 21:19:15
2013-08-01 21:29:15	9.43	11.96		1.2771	-9.61264	-12.1916
2013-08-01 21:39:15	9.45	11.98		1.28405	-9.63303	-12.212
2013-08-01 21:49:15	9.52	12.05		1.29099	-9.70438	-12.2834
2013-08-01 21:59:15	9.56	12.1		1.29794	-9.74516	-12.3344
2013-08-01 22:09:15	9.64	12.17		1.30488	-9.82671	-12.4057
2013-08-01 22:19:15	9.7	12.22		1.31183	-9.88787	-12.4567	2013-08-01 22:19:15
2013-08-01 22:29:15	9.7	12.21		1.31877	-9.88787	-12.4465
2013-08-01 22:39:15	9.77	12.3		1.32571	-9.95923	-12.5382
2013-08-01 22:49:15	9.78	12.3		1.33266	-9.96942	-12.5382
2013-08-01 22:59:15	9.77	12.28		1.3396	-9.95923	-12.5178
2013-08-01 23:09:15	9.83	12.35		1.34655	-10.0204	-12.5892
2013-08-01 23:19:15	9.82	12.34		1.35349	-10.0102	-12.579	2013-08-01 23:19:15
2013-08-01 23:29:15	9.9	12.41		1.36044	-10.0917	-12.6504
2013-08-01 23:39:15	9.96	12.48		1.36738	-10.1529	-12.7217
2013-08-01 23:49:15	9.99	12.51		1.37433	-10.1835	-12.7523
2013-08-01 23:59:15	9.96	12.49		1.38127	-10.1529	-12.7319
2013-08-02 00:09:15	9.99	12.5		1.38821	-10.1835	-12.7421
2013-08-02 00:19:15	10.01	12.53		1.39516	-10.2039	-12.7727	2013-08-02 00:19:15
2013-08-02 00:29:15	10.07	12.6		1.4021	-10.265	-12.844
2013-08-02 00:39:15	10.14	12.66		1.40905	-10.3364	-12.9052
2013-08-02 00:49:15	10.15	12.66		1.41599	-10.3466	-12.9052
2013-08-02 00:59:15	10	12.52		1.42294	-10.1937	-12.7625
2013-08-02 01:09:15	10.13	12.65		1.42988	-10.3262	-12.895
2013-08-02 01:19:15	10.19	12.71		1.43683	-10.3874	-12.9562	2013-08-02 01:19:15
2013-08-02 01:29:15	10.23	12.74		1.44377	-10.4281	-12.9867
2013-08-02 01:39:15	10.28	12.8		1.45071	-10.4791	-13.0479
2013-08-02 01:49:15	10.34	12.86		1.45766	-10.5403	-13.1091
2013-08-02 01:59:15	10.35	12.87		1.4646	-10.5505	-13.1193
2013-08-02 02:09:15	10.28	12.8		1.47155	-10.4791	-13.0479
2013-08-02 02:19:15	10.35	12.87		1.47849	-10.5505	-13.1193	2013-08-02 02:19:15
2013-08-02 02:29:15	10.41	12.93		1.48544	-10.6116	-13.1804
2013-08-02 02:39:15	10.38	12.9		1.49238	-10.581	-13.1498
2013-08-02 02:59:15	10.5	13.01		1.50627	-10.7034	-13.262
2013-08-02 03:09:15	10.51	13.03		1.51321	-10.7136	-13.2824
2013-08-02 03:19:15	10.47	12.98		1.52016	-10.6728	-13.2314
2013-08-02 03:29:15	10.51	13.03		1.5271	-10.7136	-13.2824	2013-08-02 03:29:15
2013-08-02 03:39:15	10.56	13.08		1.53405	-10.7645	-13.3333
2013-08-02 03:49:15	10.58	13.1		1.54099	-10.7849	-13.3537
2013-08-02 03:59:15	10.63	13.14		1.54794	-10.8359	-13.3945
2013-08-02 04:09:15	10.63	13.14		1.55488	-10.8359	-13.3945
2013-08-02 04:19:15	10.69	13.2		1.56183	-10.897	-13.4557
2013-08-02 04:29:15	10.72	13.24		1.56877	-10.9276	-13.4964	2013-08-02 04:29:15
2013-08-02 04:39:15	10.76	13.28		1.57571	-10.9684	-13.5372
2013-08-02 04:49:15	10.78	13.29		1.58266	-10.9888	-13.5474
2013-08-02 04:59:15	10.81	13.33		1.5896	-11.0194	-13.5882
2013-08-02 05:09:15	10.81	13.32		1.59655	-11.0194	-13.578
2013-08-02 05:19:15	10.85	13.36		1.60349	-11.0601	-13.6188
2013-08-02 05:29:15	10.85	13.36		1.61044	-11.0601	-13.6188	2013-08-02 05:29:15
2013-08-02 05:39:15	10.9	13.41		1.61738	-11.1111	-13.6697
2013-08-02 05:49:15	10.94	13.45		1.62433	-11.1519	-13.7105
2013-08-02 05:59:15	10.96	13.48		1.63127	-11.1723	-13.7411
2013-08-02 06:09:15	11.01	13.52		1.63821	-11.2232	-13.7819
2013-08-02 06:19:15	10.84	13.36		1.64516	-11.0499	-13.6188
2013-08-02 06:29:15	10.96	13.47		1.6521	-11.1723	-13.7309	2013-08-02 06:29:15
2013-08-02 06:39:15	11.03	13.53		1.65905	-11.2436	-13.792
2013-08-02 06:49:15	11.06	13.57		1.66599	-11.2742	-13.8328
2013-08-02 06:59:15	11.07	13.58		1.67294	-11.2844	-13.843
2013-08-02 07:09:15	11.11	13.61		1.67988	-11.3252	-13.8736
2013-08-02 07:19:15	11.15	13.66		1.68683	-11.366	-13.9246
2013-08-02 07:29:15	11.06	13.57		1.69377	-11.2742	-13.8328	2013-08-02 07:29:15
2013-08-02 07:39:15	11.12	13.64		1.70071	-11.3354	-13.9042
2013-08-02 07:49:15	11.19	13.7		1.70766	-11.4067	-13.9653
2013-08-02 07:59:15	11.22	13.73		1.7146	-11.4373	-13.9959
2013-08-02 08:09:15	11.28	13.79		1.72155	-11.4985	-14.0571
2013-08-02 08:19:15	11.33	13.83		1.72849	-11.5494	-14.0979
2013-08-02 08:29:15	11.29	13.8		1.73544	-11.5087	-14.0673	2013-08-02 08:29:15
2013-08-02 08:39:15	11.09	13.59		1.74238	-11.3048	-13.8532
2013-08-02 08:49:15	11.2	13.71		1.74933	-11.4169	-13.9755
2013-08-02 08:59:15	11.25	13.75		1.75627	-11.4679	-14.0163
2013-08-02 09:09:15	11.34	13.84		1.76321	-11.5596	-14.1081
2013-08-02 09:19:15	11.26	13.76		1.77016	-11.4781	-14.0265
2013-08-02 09:29:15	11.23	13.74		1.7771	-11.4475	-14.0061	2013-08-02 09:29:15
2013-08-02 09:39:15	11.32	13.82		1.78405	-11.5392	-14.0877
2013-08-02 09:49:15	11.35	13.85		1.79099	-11.5698	-14.1182
2013-08-02 09:59:15	11.4	13.89		1.79794	-11.6208	-14.159
2013-08-02 10:09:15	11.45	13.96		1.80488	-11.6718	-14.2304
2013-08-02 10:19:15	11.49	13.99		1.81183	-11.7125	-14.261
2013-08-02 10:29:15	11.42	13.93		1.81877	-11.6412	-14.1998	2013-08-02 10:29:15
2013-08-02 10:39:15	11.51	14.02		1.82571	-11.7329	-14.2915
2013-08-02 10:49:15	11.54	14.04		1.83266	-11.7635	-14.3119
2013-08-02 10:59:15	11.56	14.06		1.8396	-11.7839	-14.3323
2013-08-02 11:09:15	11.56	14.06		1.84655	-11.7839	-14.3323
2013-08-02 11:19:15	11.45	13.95		1.85349	-11.6718	-14.2202
2013-08-02 11:29:15	11.58	14.08		1.86044	-11.8043	-14.3527	2013-08-02 11:29:15
2013-08-02 11:39:15	11.62	14.13		1.86738	-11.8451	-14.4037
2013-08-02 11:49:15	11.65	14.15		1.87433	-11.8756	-14.4241
2013-08-02 11:59:15	11.67	14.17		1.88127	-11.896	-14.4444
2013-08-02 12:09:15	11.71	14.22		1.88821	-11.9368	-14.4954
2013-08-02 12:19:15	11.74	14.24		1.89516	-11.9674	-14.5158
2013-08-02 12:29:15	11.79	14.29		1.9021	-12.0183	-14.5668	2013-08-02 12:29:15
2013-08-02 12:39:15	11.67	14.17		1.90905	-11.896	-14.4444
2013-08-02 12:49:15	11.77	14.28		1.91599	-11.998	-14.5566
2013-08-02 12:59:15	11.85	14.35		1.92294	-12.0795	-14.6279
2013-08-02 13:09:15	11.92	14.42		1.92988	-12.1509	-14.6993
2013-08-02 13:19:15	11.99	14.5		1.93683	-12.2222	-14.7808
2013-08-02 13:29:15	12.02	14.53		1.94377	-12.2528	-14.8114	2013-08-02 13:29:15
2013-08-02 13:39:15	12.08	14.57		1.95071	-12.314	-14.8522
2013-08-02 13:49:15	12.11	14.6		1.95766	-12.3445	-14.8828
2013-08-02 13:59:15	12.16	14.66		1.9646	-12.3955	-14.9439
2013-08-02 14:09:15	12.17	14.66		1.97155	-12.4057	-14.9439
2013-08-02 14:19:15	12.23	14.73		1.97849	-12.4669	-15.0153
2013-08-02 14:29:15	12.27	14.77		1.98544	-12.5076	-15.0561	2013-08-02 14:29:15
2013-08-02 14:39:15	12.34	14.84		1.99238	-12.579	-15.1274
2013-08-02 14:49:15	12.39	14.89		1.99933	-12.63	-15.1784
2013-08-02 14:59:15	12.39	14.89		2.00627	-12.63	-15.1784
2013-08-02 15:09:15	12.48	14.98		2.01321	-12.7217	-15.2701
2013-08-02 15:19:15	12.53	15.02		2.02016	-12.7727	-15.3109
2013-08-02 15:29:15	12.58	15.08		2.0271	-12.8236	-15.3721	2013-08-02 15:29:15
2013-08-02 15:39:15	12.53	15.02		2.03405	-12.7727	-15.3109
2013-08-02 15:49:15	12.61	15.12		2.04099	-12.8542	-15.4128
2013-08-02 15:59:15	12.45	14.94		2.04794	-12.6911	-15.2294
2013-08-02 16:09:15	12.24	14.75		2.05488	-12.4771	-15.0357
2013-08-02 16:19:15	12.49	14.98		2.06183	-12.7319	-15.2701
2013-08-02 16:29:15	12.56	15.06		2.06877	-12.8033	-15.3517	2013-08-02 16:29:15
2013-08-02 16:39:15	12.62	15.12		2.07571	-12.8644	-15.4128
2013-08-02 16:49:15	12.72	15.21		2.08266	-12.9664	-15.5046
2013-08-02 16:59:15	12.73	15.23		2.0896	-12.9766	-15.525
2013-08-02 17:09:15	12.52	15.01		2.09655	-12.7625	-15.3007
2013-08-02 17:19:15	12.71	15.21		2.10349	-12.9562	-15.5046
2013-08-02 17:29:15	12.78	15.28		2.11044	-13.0275	-15.5759	2013-08-02 17:29:15
2013-08-02 17:39:15	12.83	15.33		2.11738	-13.0785	-15.6269
2013-08-02 17:49:15	12.79	15.29		2.12433	-13.0377	-15.5861
2013-08-02 17:59:15	12.86	15.37		2.13127	-13.1091	-15.6677
2013-08-02 18:09:15	12.9	15.4		2.13821	-13.1498	-15.6983
2013-08-02 18:19:15	12.87	15.37		2.14516	-13.1193	-15.6677
2013-08-02 18:29:15	12.96	15.45		2.1521	-13.211	-15.7492	2013-08-02 18:29:15
2013-08-02 18:39:15	13.02	15.51		2.15905	-13.2722	-15.8104
2013-08-02 18:49:15	12.98	15.47		2.16599	-13.2314	-15.7696
2013-08-02 18:59:15	13.04	15.54		2.17294	-13.2926	-15.841
2013-08-02 19:09:15	13.03	15.52		2.17988	-13.2824	-15.8206
2013-08-02 19:19:15	12.96	15.47		2.18683	-13.211	-15.7696
2013-08-02 19:29:15	13.08	15.6		2.19377	-13.3333	-15.9021	2013-08-02 19:29:15
2013-08-02 19:39:15	13.2	15.69		2.20071	-13.4557	-15.9939
2013-08-02 19:49:15	13.25	15.75		2.20766	-13.5066	-16.055
2013-08-02 19:59:15	13.3	15.8		2.2146	-13.5576	-16.106
2013-08-02 20:09:15	13.35	15.85		2.22155	-13.6086	-16.157
2013-08-02 20:19:15	13.4	15.88		2.22849	-13.6595	-16.1876
2013-08-02 20:29:15	13.46	15.95		2.23544	-13.7207	-16.2589	2013-08-02 20:29:15
2013-08-02 20:39:15	13.47	15.96		2.24238	-13.7309	-16.2691
2013-08-02 20:49:15	13.51	16		2.24933	-13.7717	-16.3099
2013-08-02 20:59:15	13.53	16.03		2.25627	-13.792	-16.3405
2013-08-02 21:09:15	13.61	16.09		2.26321	-13.8736	-16.4016
2013-08-02 21:19:15	13.68	16.17		2.27016	-13.945	-16.4832
2013-08-02 21:29:15	13.73	16.23		2.2771	-13.9959	-16.5443	2013-08-02 21:29:15
2013-08-02 21:39:15	13.74	16.23		2.28405	-14.0061	-16.5443
2013-08-02 21:49:15	13.79	16.28		2.29099	-14.0571	-16.5953
2013-08-02 21:59:15	13.75	16.23		2.29794	-14.0163	-16.5443
2013-08-02 22:09:15	13.81	16.3		2.30488	-14.0775	-16.6157
2013-08-02 22:19:15	13.87	16.35		2.31183	-14.1386	-16.6667
2013-08-02 22:29:15	13.89	16.38		2.31877	-14.159	-16.6972	2013-08-02 22:29:15
2013-08-02 22:39:15	13.9	16.39		2.32571	-14.1692	-16.7074
2013-08-02 22:49:15	13.96	16.45		2.33266	-14.2304	-16.7686
2013-08-02 22:59:15	13.98	16.47		2.3396	-14.2508	-16.789
2013-08-02 23:09:15	14.04	16.53		2.34655	-14.3119	-16.8502
2013-08-02 23:19:15	14.08	16.57		2.35349	-14.3527	-16.8909
2013-08-02 23:29:15	14.08	16.56		2.36044	-14.3527	-16.8807	2013-08-02 23:29:15
2013-08-02 23:39:15	14.11	16.59		2.36738	-14.3833	-16.9113
2013-08-02 23:49:15	14.11	16.59		2.37433	-14.3833	-16.9113
2013-08-02 23:59:15	14.13	16.61		2.38127	-14.4037	-16.9317
2013-08-03 00:09:15	14.18	16.66		2.38821	-14.4546	-16.9827
2013-08-03 00:19:15	14.16	16.64		2.39516	-14.4343	-16.9623
2013-08-03 00:29:15	14.19	16.68		2.4021	-14.4648	-17.0031	2013-08-03 00:29:15
2013-08-03 00:39:15	14.23	16.71		2.40905	-14.5056	-17.0336
2013-08-03 00:49:15	14.24	16.73		2.41599	-14.5158	-17.054
2013-08-03 00:59:15	14.27	16.76		2.42294	-14.5464	-17.0846
2013-08-03 01:09:15	14.32	16.8		2.42988	-14.5973	-17.1254
2013-08-03 01:19:15	14.36	16.84		2.43683	-14.6381	-17.1662
2013-08-03 01:29:15	14.39	16.89		2.44377	-14.6687	-17.2171	2013-08-03 01:29:15
2013-08-03 01:39:15	14.39	16.88		2.45071	-14.6687	-17.2069
2013-08-03 01:49:15	14.44	16.93		2.45766	-14.7197	-17.2579
2013-08-03 01:59:15	14.5	16.99		2.4646	-14.7808	-17.3191
2013-08-03 02:09:15	14.52	17		2.47155	-14.8012	-17.3293
2013-08-03 02:19:15	14.55	17.04		2.47849	-14.8318	-17.37
2013-08-03 02:29:15	14.57	17.06		2.48544	-14.8522	-17.3904	2013-08-03 02:29:15
2013-08-03 02:39:15	14.6	17.08		2.49238	-14.8828	-17.4108
2013-08-03 02:49:15	14.61	17.1		2.49933	-14.893	-17.4312
2013-08-03 02:59:15	14.65	17.14		2.50627	-14.9337	-17.472
2013-08-03 03:09:15	14.66	17.17		2.51321	-14.9439	-17.5025
2013-08-03 03:19:15	14.71	17.19		2.52016	-14.9949	-17.5229
2013-08-03 03:29:15	14.74	17.24		2.5271	-15.0255	-17.5739	2013-08-03 03:29:15
2013-08-03 03:39:15	14.77	17.25		2.53405	-15.0561	-17.5841
2013-08-03 03:49:15	14.79	17.27		2.54099	-15.0765	-17.6045
2013-08-03 03:59:15	14.82	17.31		2.54794	-15.107	-17.6453
2013-08-03 04:09:15	14.85	17.34		2.55488	-15.1376	-17.6758
2013-08-03 04:19:15	14.88	17.36		2.56183	-15.1682	-17.6962
2013-08-03 04:29:15	14.9	17.38		2.56877	-15.1886	-17.7166	2013-08-03 04:29:15
2013-08-03 04:39:15	14.93	17.42		2.57571	-15.2192	-17.7574
2013-08-03 04:49:15	14.95	17.43		2.58266	-15.2396	-17.7676
2013-08-03 04:59:15	14.97	17.46		2.5896	-15.2599	-17.7982
2013-08-03 05:09:15	15	17.48		2.59655	-15.2905	-17.8186
2013-08-03 05:19:15	15.01	17.49		2.60349	-15.3007	-17.8287
2013-08-03 05:29:15	15.02	17.51		2.61044	-15.3109	-17.8491	2013-08-03 05:29:15
2013-08-03 05:39:15	15.04	17.53		2.61738	-15.3313	-17.8695
2013-08-03 05:49:15	15.07	17.56		2.62433	-15.3619	-17.9001
2013-08-03 05:59:15	15.11	17.59		2.63127	-15.4027	-17.9307
2013-08-03 06:09:15	15.12	17.6		2.63821	-15.4128	-17.9409
2013-08-03 06:19:15	15.16	17.64		2.64516	-15.4536	-17.9817
2013-08-03 06:29:15	15.21	17.69		2.6521	-15.5046	-18.0326	2013-08-03 06:29:15
2013-08-03 06:39:15	15.22	17.71		2.65905	-15.5148	-18.053
2013-08-03 06:49:15	15.26	17.75		2.66599	-15.5556	-18.0938
2013-08-03 06:59:15	15.29	17.78		2.67294	-15.5861	-18.1244
2013-08-03 07:09:15	15.07	17.55		2.67988	-15.3619	-17.8899
2013-08-03 07:19:15	15.21	17.69		2.68683	-15.5046	-18.0326
2013-08-03 07:29:15	15.26	17.74		2.69377	-15.5556	-18.0836	2013-08-03 07:29:15
2013-08-03 07:39:15	15.29	17.76		2.70071	-15.5861	-18.104
2013-08-03 07:59:15	15.36	17.83		2.7146	-15.6575	-18.1753
2013-08-03 08:09:15	15.39	17.87		2.72155	-15.6881	-18.2161
2013-08-03 08:19:15	15.4	17.88		2.72849	-15.6983	-18.2263
2013-08-03 08:29:15	15.44	17.92		2.73544	-15.739	-18.2671
2013-08-03 08:39:15	15.44	17.91		2.74238	-15.739	-18.2569	2013-08-03 08:39:15
2013-08-03 08:49:15	15.46	17.94		2.74933	-15.7594	-18.2875
2013-08-03 08:59:15	15.4	17.87		2.75627	-15.6983	-18.2161
2013-08-03 09:09:15	15.32	17.8		2.76321	-15.6167	-18.1448
2013-08-03 09:19:15	15.43	17.91		2.77016	-15.7288	-18.2569
2013-08-03 09:29:15	15.46	17.94		2.7771	-15.7594	-18.2875
2013-08-03 09:39:15	15.52	18		2.78405	-15.8206	-18.3486	2013-08-03 09:39:15
2013-08-03 09:49:15	15.57	18.05		2.79099	-15.8716	-18.3996
2013-08-03 09:59:15	15.59	18.07		2.79794	-15.8919	-18.42
2013-08-03 10:09:15	15.64	18.11		2.80488	-15.9429	-18.4608
2013-08-03 10:19:15	15.66	18.13		2.81183	-15.9633	-18.4811
2013-08-03 10:29:15	15.61	18.07		2.81877	-15.9123	-18.42
2013-08-03 10:39:15	15.09	17.56		2.82571	-15.3823	-17.9001	2013-08-03 10:39:15
2013-08-03 10:49:15	15.11	17.59		2.83266	-15.4027	-17.9307
2013-08-03 10:59:15	15.28	17.74		2.8396	-15.5759	-18.0836
2013-08-03 11:09:15	15.4	17.87		2.84655	-15.6983	-18.2161
2013-08-03 11:19:15	15.52	17.99		2.85349	-15.8206	-18.3384
2013-08-03 11:29:15	15.59	18.08		2.86044	-15.8919	-18.4302
2013-08-03 11:39:15	15.6	18.06		2.86738	-15.9021	-18.4098	2013-08-03 11:39:15
2013-08-03 11:49:15	15.48	18.02		2.87433	-15.7798	-18.369
2013-08-03 11:59:15	15.63	18.1		2.88127	-15.9327	-18.4506
2013-08-03 12:09:15	15.69	18.17		2.88821	-15.9939	-18.5219
2013-08-03 12:19:15	15.72	18.2		2.89516	-16.0245	-18.5525
2013-08-03 12:29:15	15.77	18.25		2.9021	-16.0754	-18.6035
2013-08-03 12:39:15	15.8	18.27		2.90905	-16.106	-18.6239	2013-08-03 12:39:15
2013-08-03 12:49:15	15.83	18.3		2.91599	-16.1366	-18.6544
2013-08-03 12:59:15	15.8	18.28		2.92294	-16.106	-18.634
2013-08-03 13:09:15	15.85	18.33		2.92988	-16.157	-18.685
2013-08-03 13:19:15	15.89	18.38		2.93683	-16.1978	-18.736
2013-08-03 13:29:15	15.94	18.41		2.94377	-16.2487	-18.7666
2013-08-03 13:39:15	15.95	18.42		2.95071	-16.2589	-18.7768	2013-08-03 13:39:15
2013-08-03 13:49:15	15.98	18.45		2.95766	-16.2895	-18.8073
2013-08-03 13:59:15	15.98	18.45		2.9646	-16.2895	-18.8073
2013-08-03 14:09:15	16.01	18.47		2.97155	-16.3201	-18.8277
2013-08-03 14:19:15	16.04	18.51		2.97849	-16.3507	-18.8685
2013-08-03 14:29:15	16.05	18.52		2.98544	-16.3609	-18.8787
2013-08-03 14:39:15	16.09	18.55		2.99238	-16.4016	-18.9093	2013-08-03 14:39:15
2013-08-03 14:49:15	16.13	18.61		2.99933	-16.4424	-18.9704
2013-08-03 14:59:15	16.15	18.62		3.00627	-16.4628	-18.9806
2013-08-03 15:09:15	15.72	18.2		3.01321	-16.0245	-18.5525
2013-08-03 15:19:15	15.88	18.35		3.02016	-16.1876	-18.7054
2013-08-03 15:29:15	16.03	18.5		3.0271	-16.3405	-18.8583
2013-08-03 15:39:15	16.15	18.62		3.03405	-16.4628	-18.9806	2013-08-03 15:39:15
2013-08-03 15:49:15	16.22	18.68		3.04099	-16.5341	-19.0418
2013-08-03 15:59:15	16.21	18.69		3.04794	-16.524	-19.052
2013-08-03 16:09:15	16.17	18.64		3.05488	-16.4832	-19.001
2013-08-03 16:19:15	16.25	18.72		3.06183	-16.5647	-19.0826
2013-08-03 16:29:15	16.31	18.78		3.06877	-16.6259	-19.1437
2013-08-03 16:39:15	16.33	18.81		3.07571	-16.6463	-19.1743	2013-08-03 16:39:15
2013-08-03 16:49:15	16.4	18.86		3.08266	-16.7176	-19.2253
2013-08-03 16:59:15	16.38	18.86		3.0896	-16.6972	-19.2253
2013-08-03 17:09:15	16.42	18.87		3.09655	-16.738	-19.2355
2013-08-03 17:19:15	16.44	18.91		3.10349	-16.7584	-19.2762
2013-08-03 17:29:15	16.49	18.96		3.11044	-16.8094	-19.3272
2013-08-03 17:39:15	16.5	18.96		3.11738	-16.8196	-19.3272	2013-08-03 17:39:15
2013-08-03 17:49:15	16.52	18.98		3.12433	-16.84	-19.3476
2013-08-03 17:59:15	16.39	18.86		3.13127	-16.7074	-19.2253
2013-08-03 18:09:15	16.53	19.01		3.13821	-16.8502	-19.3782
2013-08-03 18:19:15	16.54	19.01		3.14516	-16.8603	-19.3782
2013-08-03 18:29:15	16.57	19.04		3.1521	-16.8909	-19.4088
2013-08-03 18:39:15	16.61	19.07		3.15905	-16.9317	-19.4393	2013-08-03 18:39:15
2013-08-03 18:49:15	16.52	18.99		3.16599	-16.84	-19.3578
2013-08-03 18:59:15	16.61	19.07		3.17294	-16.9317	-19.4393
2013-08-03 19:09:15	16.64	19.11		3.17988	-16.9623	-19.4801
2013-08-03 19:19:15	16.64	19.11		3.18683	-16.9623	-19.4801
2013-08-03 19:29:15	16.69	19.15		3.19377	-17.0133	-19.5209
2013-08-03 19:39:15	16.69	19.17		3.20071	-17.0133	-19.5413	2013-08-03 19:39:15
2013-08-03 19:49:15	16.7	19.17		3.20766	-17.0234	-19.5413
2013-08-03 19:59:15	16.74	19.22		3.2146	-17.0642	-19.5923
2013-08-03 20:09:15	16.78	19.22		3.22155	-17.105	-19.5923
2013-08-03 20:19:15	16.79	19.26		3.22849	-17.1152	-19.633
2013-08-03 20:29:15	16.83	19.3		3.23544	-17.156	-19.6738
2013-08-03 20:39:15	16.86	19.33		3.24238	-17.1865	-19.7044	2013-08-03 20:39:15
2013-08-03 20:49:15	16.64	19.09		3.24933	-16.9623	-19.4597
2013-08-03 20:59:15	16.61	19.08		3.25627	-16.9317	-19.4495
2013-08-03 21:09:15	16.73	19.2		3.26321	-17.054	-19.5719
2013-08-03 21:19:15	16.81	19.27		3.27016	-17.1356	-19.6432
2013-08-03 21:29:15	16.85	19.32		3.2771	-17.1764	-19.6942
2013-08-03 21:39:15	16.89	19.34		3.28405	-17.2171	-19.7146	2013-08-03 21:39:15
2013-08-03 21:49:15	16.89	19.35		3.29099	-17.2171	-19.7248
2013-08-03 21:59:15	16.91	19.36		3.29794	-17.2375	-19.735
2013-08-03 22:09:15	16.95	19.43		3.30488	-17.2783	-19.8063
2013-08-03 22:19:15	16.95	19.41		3.31183	-17.2783	-19.7859
2013-08-03 22:29:15	16.98	19.43		3.31877	-17.3089	-19.8063
2013-08-03 22:39:15	16.98	19.44		3.32571	-17.3089	-19.8165	2013-08-03 22:39:15
2013-08-03 22:49:15	17.03	19.48		3.33266	-17.3598	-19.8573
2013-08-03 22:59:15	17.02	19.48		3.3396	-17.3496	-19.8573
2013-08-03 23:09:15	16.98	19.43		3.34655	-17.3089	-19.8063
2013-08-03 23:19:15	17.03	19.49		3.35349	-17.3598	-19.8675
2013-08-03 23:29:15	17.02	19.48		3.36044	-17.3496	-19.8573
2013-08-03 23:39:15	17.07	19.53		3.36738	-17.4006	-19.9083	2013-08-03 23:39:15
2013-08-03 23:49:15	17.07	19.53		3.37433	-17.4006	-19.9083
2013-08-03 23:59:15	17.08	19.54		3.38127	-17.4108	-19.9185
2013-08-04 00:09:15	17.11	19.56		3.38821	-17.4414	-19.9388
2013-08-04 00:19:15	17.14	19.6		3.39516	-17.472	-19.9796
2013-08-04 00:29:15	17.14	19.61		3.4021	-17.472	-19.9898
2013-08-04 00:39:15	17.19	19.65		3.40905	-17.5229	-20.0306	2013-08-04 00:39:15
2013-08-04 00:49:15	17.22	19.68		3.41599	-17.5535	-20.0612
2013-08-04 00:59:15	17.25	19.71		3.42294	-17.5841	-20.0917
2013-08-04 01:09:15	17.28	19.73		3.42988	-17.6147	-20.1121
2013-08-04 01:19:15	17.29	19.76		3.43683	-17.6249	-20.1427
2013-08-04 01:29:15	17.31	19.76		3.44377	-17.6453	-20.1427
2013-08-04 01:39:15	17.35	19.8		3.45071	-17.686	-20.1835	2013-08-04 01:39:15
2013-08-04 01:49:15	17.35	19.8		3.45766	-17.686	-20.1835
2013-08-04 01:59:15	17.39	19.86		3.4646	-17.7268	-20.2446
2013-08-04 02:09:15	17.39	19.84		3.47155	-17.7268	-20.2243
2013-08-04 02:19:15	17.44	19.9		3.47849	-17.7778	-20.2854
2013-08-04 02:29:15	17.47	19.92		3.48544	-17.8084	-20.3058
2013-08-04 02:39:15	17.48	19.94		3.49238	-17.8186	-20.3262	2013-08-04 02:39:15
2013-08-04 02:49:15	17.49	19.95		3.49933	-17.8287	-20.3364
2013-08-04 02:59:15	17.46	19.91		3.50627	-17.7982	-20.2956
2013-08-04 03:09:15	17.51	19.97		3.51321	-17.8491	-20.3568
2013-08-04 03:19:15	17.5	19.95		3.52016	-17.8389	-20.3364
2013-08-04 03:29:15	17.53	20		3.5271	-17.8695	-20.3874
2013-08-04 03:39:15	17.56	20.03		3.53405	-17.9001	-20.4179	2013-08-04 03:39:15
2013-08-04 03:49:15	17.61	20.07		3.54099	-17.9511	-20.4587
2013-08-04 03:59:15	17.61	20.08		3.54794	-17.9511	-20.4689
2013-08-04 04:09:15	17.63	20.1		3.55488	-17.9715	-20.4893
2013-08-04 04:19:15	17.59	20.04		3.56183	-17.9307	-20.4281
2013-08-04 04:29:15	17.62	20.08		3.56877	-17.9613	-20.4689
2013-08-04 04:39:15	17.67	20.13		3.57571	-18.0122	-20.5199	2013-08-04 04:39:15
2013-08-04 04:49:15	17.65	20.11		3.58266	-17.9918	-20.4995
2013-08-04 04:59:15	17.71	20.17		3.5896	-18.053	-20.5607
2013-08-04 05:09:15	17.69	20.15		3.59655	-18.0326	-20.5403
2013-08-04 05:19:15	17.74	20.2		3.60349	-18.0836	-20.5912
2013-08-04 05:29:15	17.77	20.22		3.61044	-18.1142	-20.6116
2013-08-04 05:39:15	17.79	20.25		3.61738	-18.1346	-20.6422	2013-08-04 05:39:15
2013-08-04 05:49:15	17.81	20.27		3.62433	-18.1549	-20.6626
2013-08-04 05:59:15	17.83	20.28		3.63127	-18.1753	-20.6728
2013-08-04 06:09:15	17.82	20.28		3.63821	-18.1651	-20.6728
2013-08-04 06:19:15	17.86	20.31		3.64516	-18.2059	-20.7034
2013-08-04 06:29:15	17.87	20.32		3.6521	-18.2161	-20.7136
2013-08-04 06:39:15	17.9	20.35		3.65905	-18.2467	-20.7441	2013-08-04 06:39:15
2013-08-04 06:49:15	17.9	20.36		3.66599	-18.2467	-20.7543
2013-08-04 06:59:15	17.92	20.38		3.67294	-18.2671	-20.7747
2013-08-04 07:09:15	17.95	20.41		3.67988	-18.2977	-20.8053
2013-08-04 07:19:15	17.93	20.39		3.68683	-18.2773	-20.7849
2013-08-04 07:29:15	17.98	20.43		3.69377	-18.3282	-20.8257
2013-08-04 07:39:15	18	20.46		3.70071	-18.3486	-20.8563	2013-08-04 07:39:15
2013-08-04 07:49:15	18	20.45		3.70766	-18.3486	-20.8461
2013-08-04 07:59:15	17.99	20.45		3.7146	-18.3384	-20.8461
2013-08-04 08:09:15	18.02	20.49		3.72155	-18.369	-20.8869
2013-08-04 08:19:15	18.05	20.51		3.72849	-18.3996	-20.9072
2013-08-04 08:29:15	18.05	20.5		3.73544	-18.3996	-20.897
2013-08-04 08:39:15	18.1	20.56		3.74238	-18.4506	-20.9582	2013-08-04 08:39:15
2013-08-04 08:49:15	18.13	20.57		3.74933	-18.4811	-20.9684
2013-08-04 08:59:15	18.15	20.61		3.75627	-18.5015	-21.0092
2013-08-04 09:09:15	18.16	20.62		3.76321	-18.5117	-21.0194
2013-08-04 09:19:15	18.21	20.66		3.77016	-18.5627	-21.0601
2013-08-04 09:29:15	18.23	20.69		3.7771	-18.5831	-21.0907
2013-08-04 09:39:15	18.26	20.71		3.78405	-18.6137	-21.1111	2013-08-04 09:39:15
2013-08-04 09:49:15	18.16	20.61		3.79099	-18.5117	-21.0092
2013-08-04 09:59:15	18.21	20.66		3.79794	-18.5627	-21.0601
2013-08-04 10:09:15	18.26	20.71		3.80488	-18.6137	-21.1111
2013-08-04 10:19:15	17.87	20.32		3.81183	-18.2161	-20.7136
2013-08-04 10:29:15	18.03	20.47		3.81877	-18.3792	-20.8665
2013-08-04 10:39:15	18.12	20.57		3.82571	-18.4709	-20.9684	2013-08-04 10:39:15
2013-08-04 10:49:15	18.21	20.65		3.83266	-18.5627	-21.0499
2013-08-04 10:59:15	18.19	20.64		3.8396	-18.5423	-21.0398
2013-08-04 11:09:15	18.22	20.67		3.84655	-18.5729	-21.0703
2013-08-04 11:19:15	18.26	20.73		3.85349	-18.6137	-21.1315
2013-08-04 11:29:15	18.29	20.74		3.86044	-18.6442	-21.1417
2013-08-04 11:39:15	18.31	20.76		3.86738	-18.6646	-21.1621	2013-08-04 11:39:15
2013-08-04 11:49:15	18.36	20.81		3.87433	-18.7156	-21.213
2013-08-04 11:59:15	18.36	20.82		3.88127	-18.7156	-21.2232
2013-08-04 12:09:15	18.41	20.85		3.88821	-18.7666	-21.2538
2013-08-04 12:19:15	18.43	20.88		3.89516	-18.787	-21.2844
2013-08-04 12:29:15	18.44	20.89		3.9021	-18.7971	-21.2946
2013-08-04 12:39:15	18.48	20.94		3.90905	-18.8379	-21.3456	2013-08-04 12:39:15
2013-08-04 12:49:15	18.46	20.9		3.91599	-18.8175	-21.3048
2013-08-04 12:59:15	18.48	20.94		3.92294	-18.8379	-21.3456
2013-08-04 13:09:15	18.53	20.98		3.92988	-18.8889	-21.3863
2013-08-04 13:19:15	18.57	21.02		3.93683	-18.9297	-21.4271
2013-08-04 13:29:15	18.59	21.03		3.94377	-18.9501	-21.4373
2013-08-04 13:39:15	18.64	21.07		3.95071	-19.001	-21.4781	2013-08-04 13:39:15
2013-08-04 13:49:15	18.66	21.1		3.95766	-19.0214	-21.5087
2013-08-04 13:59:15	18.68	21.12		3.9646	-19.0418	-21.5291
2013-08-04 14:09:15	18.71	21.17		3.97155	-19.0724	-21.58
2013-08-04 14:19:15	18.74	21.17		3.97849	-19.103	-21.58
2013-08-04 14:29:15	18.77	21.22		3.98544	-19.1335	-21.631
2013-08-04 14:39:15	18.76	21.21		3.99238	-19.1233	-21.6208	2013-08-04 14:39:15
2013-08-04 14:49:15	18.81	21.25		3.99933	-19.1743	-21.6616
2013-08-04 14:59:15	18.85	21.3		4.00627	-19.2151	-21.7125
2013-08-04 15:09:15	18.84	21.28		4.01321	-19.2049	-21.6922
2013-08-04 15:19:15	18.88	21.31		4.02016	-19.2457	-21.7227
2013-08-04 15:29:15	18.89	21.34		4.0271	-19.2559	-21.7533
2013-08-04 15:39:15	18.91	21.36		4.03405	-19.2762	-21.7737	2013-08-04 15:39:15
2013-08-04 15:49:15	18.95	21.4		4.04099	-19.317	-21.8145
2013-08-04 15:59:15	18.98	21.43		4.04794	-19.3476	-21.8451
2013-08-04 16:09:15	19	21.46		4.05488	-19.368	-21.8756
2013-08-04 16:19:15	19.02	21.47		4.06183	-19.3884	-21.8858
2013-08-04 16:29:15	19.06	21.5		4.06877	-19.4292	-21.9164
2013-08-04 16:39:15	19.11	21.56		4.07571	-19.4801	-21.9776	2013-08-04 16:39:15
2013-08-04 16:49:15	19.1	21.55		4.08266	-19.4699	-21.9674
2013-08-04 16:59:15	19.13	21.58		4.0896	-19.5005	-21.998
2013-08-04 17:09:15	19.15	21.61		4.09655	-19.5209	-22.0285
2013-08-04 17:19:15	19.18	21.63		4.10349	-19.5515	-22.0489
2013-08-04 17:29:15	19.22	21.67		4.11044	-19.5923	-22.0897
2013-08-04 17:39:15	19.25	21.7		4.11738	-19.6228	-22.1203	2013-08-04 17:39:15
2013-08-04 17:49:15	19.27	21.72		4.12433	-19.6432	-22.1407
2013-08-04 17:59:15	19.3	21.74		4.13127	-19.6738	-22.1611
2013-08-04 18:09:15	19.31	21.77		4.13821	-19.684	-22.1916
2013-08-04 18:19:15	19.33	21.78		4.14516	-19.7044	-22.2018
2013-08-04 18:29:15	19.33	21.77		4.1521	-19.7044	-22.1916
2013-08-04 18:39:15	19.29	21.74		4.15905	-19.6636	-22.1611	2013-08-04 18:39:15
2013-08-04 18:49:15	19.36	21.8		4.16599	-19.735	-22.2222
2013-08-04 18:59:15	19.39	21.84		4.17294	-19.7655	-22.263
2013-08-04 19:09:15	19.42	21.87		4.17988	-19.7961	-22.2936
2013-08-04 19:19:15	19.44	21.89		4.18683	-19.8165	-22.314
2013-08-04 19:29:15	19.47	21.91		4.19377	-19.8471	-22.3344
2013-08-04 19:39:15	19.5	21.94		4.20071	-19.8777	-22.3649	2013-08-04 19:39:15
2013-08-04 19:49:15	19.53	21.97		4.20766	-19.9083	-22.3955
2013-08-04 19:59:15	19.57	22.02		4.2146	-19.949	-22.4465
2013-08-04 20:09:15	19.08	21.56		4.22155	-19.4495	-21.9776
2013-08-04 20:19:15	19.24	21.7		4.22849	-19.6126	-22.1203
2013-08-04 20:29:15	19.4	21.87		4.23544	-19.7757	-22.2936
2013-08-04 20:39:15	19.53	22		4.24238	-19.9083	-22.4261	2013-08-04 20:39:15
2013-08-04 20:49:15	19.57	22.04		4.24933	-19.949	-22.4669
2013-08-04 20:59:15	19.62	22.08		4.25627	-20	-22.5076
2013-08-04 21:09:15	19.64	22.11		4.26321	-20.0204	-22.5382
2013-08-04 21:19:15	19.67	22.14		4.27016	-20.051	-22.5688
2013-08-04 21:29:15	19.69	22.16		4.2771	-20.0714	-22.5892
2013-08-04 21:39:15	19.74	22.21		4.28405	-20.1223	-22.6402	2013-08-04 21:39:15
2013-08-04 21:49:15	19.76	22.23		4.29099	-20.1427	-22.6606
2013-08-04 21:59:15	19.79	22.26		4.29794	-20.1733	-22.6911
2013-08-04 22:09:15	19.78	22.24		4.30488	-20.1631	-22.6707
2013-08-04 22:19:15	19.8	22.27		4.31183	-20.1835	-22.7013
2013-08-04 22:29:15	19.85	22.32		4.31877	-20.2345	-22.7523
2013-08-04 22:39:15	19.86	22.32		4.32571	-20.2446	-22.7523	2013-08-04 22:39:15
2013-08-04 22:49:15	19.88	22.34		4.33266	-20.265	-22.7727
2013-08-04 22:59:15	19.91	22.36		4.3396	-20.2956	-22.7931
2013-08-04 23:09:15	19.91	22.39		4.34655	-20.2956	-22.8236
2013-08-04 23:19:15	19.93	22.4		4.35349	-20.316	-22.8338
2013-08-04 23:29:15	19.96	22.43		4.36044	-20.3466	-22.8644
2013-08-04 23:39:15	19.99	22.45		4.36738	-20.3772	-22.8848	2013-08-04 23:39:15
2013-08-04 23:49:15	19.99	22.45		4.37433	-20.3772	-22.8848
2013-08-04 23:59:15	20.02	22.48		4.38127	-20.4077	-22.9154
2013-08-05 00:09:15	19.98	22.44		4.38821	-20.367	-22.8746
2013-08-05 00:19:15	20.02	22.47		4.39516	-20.4077	-22.9052
2013-08-05 00:29:15	20.03	22.49		4.4021	-20.4179	-22.9256
2013-08-05 00:39:15	20.02	22.51		4.40905	-20.4077	-22.946	2013-08-05 00:39:15
2013-08-05 00:49:15	19.9	22.36		4.41599	-20.2854	-22.7931
2013-08-05 00:59:15	19.99	22.47		4.42294	-20.3772	-22.9052
2013-08-05 01:09:15	20.05	22.5		4.42988	-20.4383	-22.9358
2013-08-05 01:19:15	20.07	22.53		4.43683	-20.4587	-22.9664
2013-08-05 01:29:15	20.1	22.58		4.44377	-20.4893	-23.0173
2013-08-05 01:39:15	20.12	22.58		4.45071	-20.5097	-23.0173	2013-08-05 01:39:15
2013-08-05 01:49:15	20.13	22.59		4.45766	-20.5199	-23.0275
2013-08-05 01:59:15	20.15	22.62		4.4646	-20.5403	-23.0581
2013-08-05 02:09:15	20.17	22.63		4.47155	-20.5607	-23.0683
2013-08-05 02:19:15	20.18	22.65		4.47849	-20.5708	-23.0887
2013-08-05 02:29:15	20.22	22.68		4.48544	-20.6116	-23.1193
2013-08-05 02:39:15	20.23	22.69		4.49238	-20.6218	-23.1295	2013-08-05 02:39:15
2013-08-05 02:49:15	20.21	22.68		4.49933	-20.6014	-23.1193
2013-08-05 02:59:15	20.25	22.72		4.50627	-20.6422	-23.16
2013-08-05 03:09:15	20.28	22.73		4.51321	-20.6728	-23.1702
2013-08-05 03:19:15	20.3	22.75		4.52016	-20.6932	-23.1906
2013-08-05 03:29:15	20.32	22.79		4.5271	-20.7136	-23.2314
2013-08-05 03:39:15	20.35	22.82		4.53405	-20.7441	-23.262	2013-08-05 03:39:15
2013-08-05 03:49:15	20.36	22.83		4.54099	-20.7543	-23.2722
2013-08-05 03:59:15	20.39	22.85		4.54794	-20.7849	-23.2926
2013-08-05 04:09:15	20.41	22.88		4.55488	-20.8053	-23.3231
2013-08-05 04:19:15	20.43	22.89		4.56183	-20.8257	-23.3333
2013-08-05 04:29:15	20.44	22.93		4.56877	-20.8359	-23.3741
2013-08-05 04:39:15	20.48	22.94		4.57571	-20.8767	-23.3843	2013-08-05 04:39:15
2013-08-05 04:49:15	20.5	22.97		4.58266	-20.897	-23.4149
2013-08-05 04:59:15	20.5	22.96		4.5896	-20.897	-23.4047
2013-08-05 05:09:15	20.52	23		4.59655	-20.9174	-23.4455
2013-08-05 05:19:15	20.56	23.03		4.60349	-20.9582	-23.476
2013-08-05 05:29:15	20.59	23.05		4.61044	-20.9888	-23.4964
2013-08-05 05:39:15	20.61	23.07		4.61738	-21.0092	-23.5168	2013-08-05 05:39:15
2013-08-05 05:49:15	20.64	23.11		4.62433	-21.0398	-23.5576
2013-08-05 05:59:15	20.66	23.14		4.63127	-21.0601	-23.5882
2013-08-05 06:09:15	20.68	23.14		4.63821	-21.0805	-23.5882
2013-08-05 06:19:15	20.71	23.17		4.64516	-21.1111	-23.6188
2013-08-05 06:29:15	20.75	23.22		4.6521	-21.1519	-23.6697
2013-08-05 06:39:15	20.77	23.23		4.65905	-21.1723	-23.6799	2013-08-05 06:39:15
2013-08-05 06:49:15	20.78	23.25		4.66599	-21.1825	-23.7003
2013-08-05 06:59:15	20.82	23.28		4.67294	-21.2232	-23.7309
2013-08-05 07:09:15	20.8	23.26		4.67988	-21.2029	-23.7105
2013-08-05 07:19:15	20.84	23.3		4.68683	-21.2436	-23.7513
2013-08-05 07:29:15	20.88	23.34		4.69377	-21.2844	-23.792
2013-08-05 07:39:15	20.91	23.36		4.70071	-21.315	-23.8124	2013-08-05 07:39:15
2013-08-05 07:49:15	20.86	23.33		4.70766	-21.264	-23.7819
2013-08-05 07:59:15	20.9	23.36		4.7146	-21.3048	-23.8124
2013-08-05 08:09:15	20.93	23.38		4.72155	-21.3354	-23.8328
2013-08-05 08:19:15	20.93	23.4		4.72849	-21.3354	-23.8532
2013-08-05 08:29:15	20.98	23.44		4.73544	-21.3863	-23.894
2013-08-05 08:39:15	20.26	22.72		4.74238	-20.6524	-23.16	2013-08-05 08:39:15
2013-08-05 08:49:15	20.49	22.95		4.74933	-20.8869	-23.3945
2013-08-05 08:59:15	20.6	23.08		4.75627	-20.999	-23.527
2013-08-05 09:09:15	20.74	23.2		4.76321	-21.1417	-23.6493
2013-08-05 09:19:15	20.86	23.32		4.77016	-21.264	-23.7717
2013-08-05 09:29:15	20.94	23.4		4.7771	-21.3456	-23.8532
2013-08-05 09:39:15	21.01	23.48		4.78405	-21.4169	-23.9348	2013-08-05 09:39:15
2013-08-05 09:49:15	21.02	23.48		4.79099	-21.4271	-23.9348
2013-08-05 09:59:15	21.09	23.55		4.79794	-21.4985	-24.0061
2013-08-05 10:09:15	21.11	23.58		4.80488	-21.5189	-24.0367
2013-08-05 10:19:15	21.17	23.63		4.81183	-21.58	-24.0877
2013-08-05 10:29:15	21.18	23.64		4.81877	-21.5902	-24.0979
2013-08-05 10:39:15	21.21	23.67		4.82571	-21.6208	-24.1284	2013-08-05 10:39:15
2013-08-05 10:49:15	21.21	23.67		4.83266	-21.6208	-24.1284
2013-08-05 10:59:15	21.23	23.68		4.8396	-21.6412	-24.1386
2013-08-05 11:09:15	21.26	23.73		4.84655	-21.6718	-24.1896
2013-08-05 11:19:15	21.27	23.73		4.85349	-21.682	-24.1896
2013-08-05 11:29:15	21.3	23.76		4.86044	-21.7125	-24.2202
2013-08-05 11:39:15	21.32	23.79		4.86738	-21.7329	-24.2508	2013-08-05 11:39:15
2013-08-05 11:49:15	21.33	23.8		4.87433	-21.7431	-24.261
2013-08-05 11:59:15	21.37	23.83		4.88127	-21.7839	-24.2915
2013-08-05 12:09:15	21.39	23.86		4.88821	-21.8043	-24.3221
2013-08-05 12:19:15	21.45	23.91		4.89516	-21.8654	-24.3731
2013-08-05 12:29:15	21.47	23.91		4.9021	-21.8858	-24.3731
2013-08-05 12:39:15	21.5	23.95		4.90905	-21.9164	-24.4139	2013-08-05 12:39:15
2013-08-05 12:49:15	21.53	24		4.91599	-21.947	-24.4648
2013-08-05 12:59:15	21.55	24.02		4.92294	-21.9674	-24.4852
2013-08-05 13:09:15	21.56	24.03		4.92988	-21.9776	-24.4954
2013-08-05 13:19:15	21.58	24.05		4.93683	-21.998	-24.5158
2013-08-05 13:29:15	21.39	23.87		4.94377	-21.8043	-24.3323
2013-08-05 13:39:15	21.52	23.99		4.95071	-21.9368	-24.4546	2013-08-05 13:39:15
2013-08-05 13:49:15	21.59	24.06		4.95766	-22.0082	-24.526
2013-08-05 13:59:15	21.67	24.13		4.9646	-22.0897	-24.5973
2013-08-05 14:09:15	21.72	24.18		4.97155	-22.1407	-24.6483
2013-08-05 14:19:15	21.75	24.22		4.97849	-22.1713	-24.6891
2013-08-05 14:29:15	21.71	24.18		4.98544	-22.1305	-24.6483
2013-08-05 14:49:15	21.82	24.29		4.99933	-22.2426	-24.7604	2013-08-05 14:49:15
2013-08-05 14:59:15	21.86	24.32		5.00627	-22.2834	-24.791
2013-08-05 15:09:15	21.9	24.36		5.01321	-22.3242	-24.8318
2013-08-05 15:19:15	21.95	24.41		5.02016	-22.3751	-24.8828
2013-08-05 15:29:15	21.99	24.45		5.0271	-22.4159	-24.9235
2013-08-05 15:39:15	22	24.48		5.03405	-22.4261	-24.9541
2013-08-05 15:49:15	22.05	24.51		5.04099	-22.4771	-24.9847	2013-08-05 15:49:15
2013-08-05 15:59:15	22.11	24.56		5.04794	-22.5382	-25.0357
2013-08-05 16:09:15	22.16	24.62		5.05488	-22.5892	-25.0968
2013-08-05 16:19:15	22.16	24.63		5.06183	-22.5892	-25.107
2013-08-05 16:29:15	22.19	24.65		5.06877	-22.6198	-25.1274
2013-08-05 16:39:15	22.23	24.69		5.07571	-22.6606	-25.1682
2013-08-05 16:49:15	22.27	24.73		5.08266	-22.7013	-25.209	2013-08-05 16:49:15
2013-08-05 16:59:15	22.3	24.76		5.0896	-22.7319	-25.2396
2013-08-05 17:09:15	22.33	24.79		5.09655	-22.7625	-25.2701
2013-08-05 17:19:15	22.39	24.85		5.10349	-22.8236	-25.3313
2013-08-05 17:29:15	22.41	24.87		5.11044	-22.844	-25.3517
2013-08-05 17:39:15	22.39	24.85		5.11738	-22.8236	-25.3313
2013-08-05 17:49:15	22.49	24.95		5.12433	-22.9256	-25.4332	2013-08-05 17:49:15
2013-08-05 17:59:15	22.47	24.93		5.13127	-22.9052	-25.4128
2013-08-05 18:09:15	22.49	24.95		5.13821	-22.9256	-25.4332
2013-08-05 18:19:15	22.53	25		5.14516	-22.9664	-25.4842
2013-08-05 18:29:15	22.58	25.04		5.1521	-23.0173	-25.525
2013-08-05 18:39:15	22.62	25.1		5.15905	-23.0581	-25.5861
2013-08-05 18:49:15	22.64	25.11		5.16599	-23.0785	-25.5963	2013-08-05 18:49:15
2013-08-05 18:59:15	22.69	25.15		5.17294	-23.1295	-25.6371
2013-08-05 19:09:15	22.7	25.16		5.17988	-23.1397	-25.6473
2013-08-05 19:19:15	22.77	25.22		5.18683	-23.211	-25.7085
2013-08-05 19:29:15	22.78	25.25		5.19377	-23.2212	-25.739
2013-08-05 19:39:15	22.81	25.28		5.20071	-23.2518	-25.7696
2013-08-05 19:49:15	22.86	25.33		5.20766	-23.3028	-25.8206	2013-08-05 19:49:15
2013-08-05 19:59:15	22.9	25.36		5.2146	-23.3435	-25.8512
2013-08-05 20:09:15	22.92	25.38		5.22155	-23.3639	-25.8716
2013-08-05 20:19:15	22.92	25.37		5.22849	-23.3639	-25.8614
2013-08-05 20:29:15	22.96	25.4		5.23544	-23.4047	-25.8919
2013-08-05 20:39:15	22.98	25.44		5.24238	-23.4251	-25.9327
2013-08-05 20:49:15	22.54	25.01		5.24933	-22.9766	-25.4944	2013-08-05 20:49:15
2013-08-05 20:59:15	22.72	25.19		5.25627	-23.16	-25.6779
2013-08-05 21:09:15	22.8	25.27		5.26321	-23.2416	-25.7594
2013-08-05 21:19:15	22.92	25.39		5.27016	-23.3639	-25.8818
2013-08-05 21:29:15	22.98	25.44		5.2771	-23.4251	-25.9327
2013-08-05 21:39:15	23.01	25.48		5.28405	-23.4557	-25.9735
2013-08-05 21:49:15	23.02	25.49		5.29099	-23.4659	-25.9837	2013-08-05 21:49:15
2013-08-05 21:59:15	23.05	25.52		5.29794	-23.4964	-26.0143
2013-08-05 22:09:15	23.09	25.55		5.30488	-23.5372	-26.0449
2013-08-05 22:19:15	23.11	25.57		5.31183	-23.5576	-26.0652
2013-08-05 22:29:15	23.14	25.6		5.31877	-23.5882	-26.0958
2013-08-05 22:39:15	23.17	25.65		5.32571	-23.6188	-26.1468
2013-08-05 22:49:15	23.19	25.65		5.33266	-23.6391	-26.1468	2013-08-05 22:49:15
2013-08-05 22:59:15	23.23	25.7		5.3396	-23.6799	-26.1978
2013-08-05 23:09:15	23.26	25.73		5.34655	-23.7105	-26.2283
2013-08-05 23:19:15	23.29	25.75		5.35349	-23.7411	-26.2487
2013-08-05 23:29:15	23.32	25.78		5.36044	-23.7717	-26.2793
2013-08-05 23:39:15	23.34	25.81		5.36738	-23.792	-26.3099
2013-08-05 23:49:15	23.37	25.83		5.37433	-23.8226	-26.3303	2013-08-05 23:49:15
2013-08-05 23:59:15	23.36	25.83		5.38127	-23.8124	-26.3303
2013-08-06 00:09:15	23.4	25.86		5.38821	-23.8532	-26.3609
2013-08-06 00:19:15	23.43	25.89		5.39516	-23.8838	-26.3914
2013-08-06 00:29:15	23.42	25.88		5.4021	-23.8736	-26.3812
2013-08-06 00:39:15	23.44	25.91		5.40905	-23.894	-26.4118
2013-08-06 00:49:15	23.47	25.93		5.41599	-23.9246	-26.4322	2013-08-06 00:49:15
2013-08-06 00:59:15	23.51	25.98		5.42294	-23.9653	-26.4832
2013-08-06 01:09:15	23.52	25.98		5.42988	-23.9755	-26.4832
2013-08-06 01:19:15	23.52	25.98		5.43683	-23.9755	-26.4832
2013-08-06 01:29:15	23.54	26.02		5.44377	-23.9959	-26.524
2013-08-06 01:39:15	23.55	26.02		5.45071	-24.0061	-26.524
2013-08-06 01:49:15	23.59	26.05		5.45766	-24.0469	-26.5545	2013-08-06 01:49:15
2013-08-06 01:59:15	23.63	26.09		5.4646	-24.0877	-26.5953
2013-08-06 02:09:15	23.63	26.1		5.47155	-24.0877	-26.6055
2013-08-06 02:19:15	23.65	26.11		5.47849	-24.1081	-26.6157
2013-08-06 02:29:15	23.67	26.14		5.48544	-24.1284	-26.6463
2013-08-06 02:39:15	23.7	26.16		5.49238	-24.159	-26.6667
2013-08-06 02:49:15	23.71	26.17		5.49933	-24.1692	-26.6769	2013-08-06 02:49:15
2013-08-06 02:59:15	23.74	26.2		5.50627	-24.1998	-26.7074
2013-08-06 03:09:15	23.77	26.22		5.51321	-24.2304	-26.7278
2013-08-06 03:19:15	23.79	26.26		5.52016	-24.2508	-26.7686
2013-08-06 03:29:15	23.81	26.28		5.5271	-24.2712	-26.789
2013-08-06 03:39:15	23.83	26.3		5.53405	-24.2915	-26.8094
2013-08-06 03:49:15	23.83	26.3		5.54099	-24.2915	-26.8094	2013-08-06 03:49:15
2013-08-06 03:59:15	23.87	26.32		5.54794	-24.3323	-26.8298
2013-08-06 04:09:15	23.89	26.35		5.55488	-24.3527	-26.8603
2013-08-06 04:19:15	23.91	26.37		5.56183	-24.3731	-26.8807
2013-08-06 04:29:15	23.93	26.39		5.56877	-24.3935	-26.9011
2013-08-06 04:39:15	23.96	26.42		5.57571	-24.4241	-26.9317
2013-08-06 04:49:15	23.97	26.44		5.58266	-24.4343	-26.9521	2013-08-06 04:49:15
2013-08-06 04:59:15	23.98	26.44		5.5896	-24.4444	-26.9521
2013-08-06 05:09:15	23.99	26.45		5.59655	-24.4546	-26.9623
2013-08-06 05:19:15	24.02	26.49		5.60349	-24.4852	-27.0031
2013-08-06 05:29:15	24.04	26.51		5.61044	-24.5056	-27.0234
2013-08-06 05:39:15	24.05	26.52		5.61738	-24.5158	-27.0336
2013-08-06 05:49:15	23.98	26.53		5.62433	-24.4444	-27.0438	2013-08-06 05:49:15
2013-08-06 05:59:15	24.09	26.55		5.63127	-24.5566	-27.0642
2013-08-06 06:09:15	24.11	26.58		5.63821	-24.577	-27.0948
2013-08-06 06:19:15	24.13	26.59		5.64516	-24.5973	-27.105
2013-08-06 06:29:15	24.14	26.59		5.6521	-24.6075	-27.105
2013-08-06 06:39:15	24.16	26.62		5.65905	-24.6279	-27.1356
2013-08-06 06:49:15	24.15	26.62		5.66599	-24.6177	-27.1356	2013-08-06 06:49:15
2013-08-06 06:59:15	24.2	26.66		5.67294	-24.6687	-27.1764
2013-08-06 07:09:15	23.95	26.41		5.67988	-24.4139	-26.9215
2013-08-06 07:19:15	24.08	26.55		5.68683	-24.5464	-27.0642
2013-08-06 07:29:15	24.15	26.62		5.69377	-24.6177	-27.1356
2013-08-06 07:39:15	24.19	26.67		5.70071	-24.6585	-27.1865
2013-08-06 07:49:15	24.22	26.69		5.70766	-24.6891	-27.2069	2013-08-06 07:49:15
2013-08-06 07:59:15	24.24	26.7		5.7146	-24.7095	-27.2171
2013-08-06 08:09:15	24.27	26.73		5.72155	-24.7401	-27.2477
2013-08-06 08:19:15	24.28	26.74		5.72849	-24.7503	-27.2579
2013-08-06 08:29:15	24.31	26.77		5.73544	-24.7808	-27.2885
2013-08-06 08:39:15	24.31	26.78		5.74238	-24.7808	-27.2987
2013-08-06 08:49:15	24.36	26.81		5.74933	-24.8318	-27.3293	2013-08-06 08:49:15
2013-08-06 08:59:15	24.38	26.83		5.75627	-24.8522	-27.3496
2013-08-06 09:09:15	24.4	26.86		5.76321	-24.8726	-27.3802
2013-08-06 09:19:15	24.42	26.88		5.77016	-24.893	-27.4006
2013-08-06 09:29:15	24.42	26.88		5.7771	-24.893	-27.4006
2013-08-06 09:39:15	24.45	26.91		5.78405	-24.9235	-27.4312
2013-08-06 09:49:15	24.41	26.88		5.79099	-24.8828	-27.4006	2013-08-06 09:49:15
2013-08-06 09:59:15	24.47	26.93		5.79794	-24.9439	-27.4516
2013-08-06 10:09:15	24.47	26.94		5.80488	-24.9439	-27.4618
2013-08-06 10:19:15	24.47	26.93		5.81183	-24.9439	-27.4516
2013-08-06 10:29:15	24.5	26.97		5.81877	-24.9745	-27.4924
2013-08-06 10:39:15	24.52	26.99		5.82571	-24.9949	-27.5127
2013-08-06 10:49:15	24.56	27.02		5.83266	-25.0357	-27.5433	2013-08-06 10:49:15
2013-08-06 10:59:15	24.55	27.02		5.8396	-25.0255	-27.5433
2013-08-06 11:09:15	24.58	27.03		5.84655	-25.0561	-27.5535
2013-08-06 11:19:15	24.59	27.05		5.85349	-25.0663	-27.5739
2013-08-06 11:29:15	24.62	27.09		5.86044	-25.0968	-27.6147
2013-08-06 11:39:15	24.66	27.11		5.86738	-25.1376	-27.6351
2013-08-06 11:49:15	24.66	27.14		5.87433	-25.1376	-27.6656	2013-08-06 11:49:15
2013-08-06 11:59:15	24.69	27.15		5.88127	-25.1682	-27.6758
2013-08-06 12:09:15	24.72	27.18		5.88821	-25.1988	-27.7064
2013-08-06 12:19:15	24.75	27.22		5.89516	-25.2294	-27.7472
2013-08-06 12:29:15	24.79	27.25		5.9021	-25.2701	-27.7778
2013-08-06 12:39:15	24.75	27.2		5.90905	-25.2294	-27.7268
2013-08-06 12:49:15	24.37	26.84		5.91599	-24.842	-27.3598	2013-08-06 12:49:15
2013-08-06 12:59:15	24.58	27.05		5.92294	-25.0561	-27.5739
2013-08-06 13:09:15	24.73	27.19		5.92988	-25.209	-27.7166
2013-08-06 13:19:15	24.83	27.26		5.93683	-25.3109	-27.788
2013-08-06 13:29:15	24.89	27.34		5.94377	-25.3721	-27.8695
2013-08-06 13:39:15	24.89	27.35		5.95071	-25.3721	-27.8797
2013-08-06 13:49:15	24.92	27.39		5.95766	-25.4027	-27.9205	2013-08-06 13:49:15
2013-08-06 13:59:15	24.97	27.43		5.9646	-25.4536	-27.9613
2013-08-06 14:09:15	24.98	27.44		5.97155	-25.4638	-27.9715
2013-08-06 14:19:15	25.02	27.49		5.97849	-25.5046	-28.0224
2013-08-06 14:29:15	25.01	27.48		5.98544	-25.4944	-28.0122
2013-08-06 14:39:15	25.1	27.55		5.99238	-25.5861	-28.0836
2013-08-06 14:49:15	25.12	27.57		5.99933	-25.6065	-28.104	2013-08-06 14:49:15
2013-08-06 14:59:15	25.16	27.63		6.00627	-25.6473	-28.1651
2013-08-06 15:09:15	25.18	27.65		6.01321	-25.6677	-28.1855
2013-08-06 15:19:15	25.23	27.7		6.02016	-25.7187	-28.2365
2013-08-06 15:29:15	25.28	27.74		6.0271	-25.7696	-28.2773
2013-08-06 15:39:15	25.31	27.77		6.03405	-25.8002	-28.3078
2013-08-06 15:49:15	25.37	27.83		6.04099	-25.8614	-28.369	2013-08-06 15:49:15
2013-08-06 15:59:15	25.41	27.86		6.04794	-25.9021	-28.3996
2013-08-06 16:09:15	25.45	27.91		6.05488	-25.9429	-28.4506
2013-08-06 16:19:15	25.48	27.94		6.06183	-25.9735	-28.4811
2013-08-06 16:29:15	25.51	27.98		6.06877	-26.0041	-28.5219
2013-08-06 16:39:15	25.54	28.01		6.07571	-26.0347	-28.5525
2013-08-06 16:49:15	25.57	28.03		6.08266	-26.0652	-28.5729	2013-08-06 16:49:15
2013-08-06 16:59:15	25.63	28.08		6.0896	-26.1264	-28.6239
2013-08-06 17:09:15	25.66	28.12		6.09655	-26.157	-28.6646
2013-08-06 17:19:15	25.72	28.17		6.10349	-26.2181	-28.7156
2013-08-06 17:29:15	25.74	28.2		6.11044	-26.2385	-28.7462
2013-08-06 17:39:15	25.79	28.25		6.11738	-26.2895	-28.7971
2013-08-06 17:49:15	25.84	28.3		6.12433	-26.3405	-28.8481	2013-08-06 17:49:15
2013-08-06 17:59:15	25.88	28.33		6.13127	-26.3812	-28.8787
2013-08-06 18:09:15	25.87	28.34		6.13821	-26.371	-28.8889
2013-08-06 18:19:15	25.64	28.1		6.14516	-26.1366	-28.6442
2013-08-06 18:29:15	25.83	28.29		6.1521	-26.3303	-28.8379
2013-08-06 18:39:15	25.95	28.41		6.15905	-26.4526	-28.9602
2013-08-06 18:49:15	26.01	28.47		6.16599	-26.5138	-29.0214	2013-08-06 18:49:15
2013-08-06 18:59:15	26.04	28.51		6.17294	-26.5443	-29.0622
2013-08-06 19:09:15	26.08	28.54		6.17988	-26.5851	-29.0928
2013-08-06 19:19:15	26.12	28.57		6.18683	-26.6259	-29.1233
2013-08-06 19:29:15	26.14	28.6		6.19377	-26.6463	-29.1539
2013-08-06 19:39:15	26.19	28.65		6.20071	-26.6972	-29.2049
2013-08-06 19:49:15	26.21	28.66		6.20766	-26.7176	-29.2151	2013-08-06 19:49:15
2013-08-06 19:59:15	26.23	28.69		6.2146	-26.738	-29.2457
2013-08-06 20:09:15	26.2	28.72		6.22155	-26.7074	-29.2762
2013-08-06 20:19:15	26.28	28.73		6.22849	-26.789	-29.2864
2013-08-06 20:29:15	26.33	28.79		6.23544	-26.84	-29.3476
2013-08-06 20:39:15	26.36	28.82		6.24238	-26.8705	-29.3782
2013-08-06 20:49:15	26.38	28.85		6.24933	-26.8909	-29.4088	2013-08-06 20:49:15
2013-08-06 20:59:15	26.44	28.9		6.25627	-26.9521	-29.4597
2013-08-06 21:09:15	26.45	28.92		6.26321	-26.9623	-29.4801
2013-08-06 21:19:15	26.48	28.94		6.27016	-26.9929	-29.5005
2013-08-06 21:29:15	26.53	28.98		6.2771	-27.0438	-29.5413
2013-08-06 21:39:15	26.53	29		6.28405	-27.0438	-29.5617
2013-08-06 21:49:15	26.55	29.01		6.29099	-27.0642	-29.5719	2013-08-06 21:49:15
2013-08-06 21:59:15	26.55	29.02		6.29794	-27.0642	-29.5821
2013-08-06 22:09:15	26.6	29.06		6.30488	-27.1152	-29.6228
2013-08-06 22:19:15	26.64	29.1		6.31183	-27.156	-29.6636
2013-08-06 22:29:15	26.66	29.12		6.31877	-27.1764	-29.684
2013-08-06 22:39:15	26.7	29.15		6.32571	-27.2171	-29.7146
2013-08-06 22:49:15	26.68	29.15		6.33266	-27.1967	-29.7146	2013-08-06 22:49:15
2013-08-06 22:59:15	26.71	29.17		6.3396	-27.2273	-29.735
2013-08-06 23:09:15	26.74	29.21		6.34655	-27.2579	-29.7757
2013-08-06 23:19:15	26.73	29.16		6.35349	-27.2477	-29.7248
2013-08-06 23:29:15	26.72	29.18		6.36044	-27.2375	-29.7452
2013-08-06 23:39:15	26.74	29.21		6.36738	-27.2579	-29.7757
2013-08-06 23:49:15	26.78	29.24		6.37433	-27.2987	-29.8063	2013-08-06 23:49:15
2013-08-06 23:59:15	26.78	29.24		6.38127	-27.2987	-29.8063
2013-08-07 00:09:15	26.82	29.28		6.38821	-27.3394	-29.8471
2013-08-07 00:19:15	26.82	29.28		6.39516	-27.3394	-29.8471
2013-08-07 00:29:15	26.83	29.29		6.4021	-27.3496	-29.8573
2013-08-07 00:39:15	26.84	29.3		6.40905	-27.3598	-29.8675
2013-08-07 00:49:15	26.88	29.33		6.41599	-27.4006	-29.8981	2013-08-07 00:49:15
2013-08-07 00:59:15	26.88	29.34		6.42294	-27.4006	-29.9083
2013-08-07 01:09:15	26.93	29.39		6.42988	-27.4516	-29.9592
2013-08-07 01:19:15	26.93	29.39		6.43683	-27.4516	-29.9592
2013-08-07 01:29:15	26.96	29.43		6.44377	-27.4822	-30
2013-08-07 01:39:15	26.98	29.44		6.45071	-27.5025	-30.0102
2013-08-07 01:49:15	27	29.47		6.45766	-27.5229	-30.0408	2013-08-07 01:49:15
2013-08-07 01:59:15	27.03	29.49		6.4646	-27.5535	-30.0612
2013-08-07 02:09:15	27.05	29.51		6.47155	-27.5739	-30.0815
2013-08-07 02:19:15	27.09	29.54		6.47849	-27.6147	-30.1121
2013-08-07 02:29:15	27.09	29.55		6.48544	-27.6147	-30.1223
2013-08-07 02:39:15	27.13	29.59		6.49238	-27.6555	-30.1631
2013-08-07 02:49:15	27.16	29.62		6.49933	-27.686	-30.1937	2013-08-07 02:49:15
2013-08-07 02:59:15	27.2	29.66		6.50627	-27.7268	-30.2345
2013-08-07 03:09:15	27.21	29.68		6.51321	-27.737	-30.2548
2013-08-07 03:19:15	27.25	29.72		6.52016	-27.7778	-30.2956
2013-08-07 03:29:15	27.25	29.71		6.5271	-27.7778	-30.2854
2013-08-07 03:39:15	27.28	29.73		6.53405	-27.8084	-30.3058
2013-08-07 03:49:15	27.3	29.76		6.54099	-27.8287	-30.3364	2013-08-07 03:49:15
2013-08-07 03:59:15	27.32	29.78		6.54794	-27.8491	-30.3568
2013-08-07 04:09:15	27.35	29.81		6.55488	-27.8797	-30.3874
2013-08-07 04:19:15	27.35	29.82		6.56183	-27.8797	-30.3976
2013-08-07 04:29:15	27.37	29.83		6.56877	-27.9001	-30.4077
2013-08-07 04:39:15	27.41	29.87		6.57571	-27.9409	-30.4485
2013-08-07 04:49:15	27.43	29.88		6.58266	-27.9613	-30.4587	2013-08-07 04:49:15
2013-08-07 04:59:15	27.45	29.92		6.5896	-27.9817	-30.4995
2013-08-07 05:09:15	27.49	29.95		6.59655	-28.0224	-30.5301
2013-08-07 05:19:15	27.51	29.96		6.60349	-28.0428	-30.5403
2013-08-07 05:29:15	27.54	29.99		6.61044	-28.0734	-30.5708
2013-08-07 05:39:15	27.55	30		6.61738	-28.0836	-30.581
2013-08-07 05:49:15	27.55	30.02		6.62433	-28.0836	-30.6014	2013-08-07 05:49:15
2013-08-07 05:59:15	27.6	30.05		6.63127	-28.1346	-30.632
2013-08-07 06:09:15	27.62	30.08		6.63821	-28.1549	-30.6626
2013-08-07 06:19:15	27.65	30.12		6.64516	-28.1855	-30.7034
2013-08-07 06:29:15	27.68	30.13		6.6521	-28.2161	-30.7136
2013-08-07 06:39:15	27.69	30.15		6.65905	-28.2263	-30.7339
2013-08-07 06:49:15	27.73	30.19		6.66599	-28.2671	-30.7747	2013-08-07 06:49:15
2013-08-07 06:59:15	27.77	30.22		6.67294	-28.3078	-30.8053
2013-08-07 07:09:15	27.78	30.24		6.67988	-28.318	-30.8257
2013-08-07 07:19:15	27.82	30.28		6.68683	-28.3588	-30.8665
2013-08-07 07:29:15	27.82	30.29		6.69377	-28.3588	-30.8767
2013-08-07 07:39:15	27.84	30.31		6.70071	-28.3792	-30.897
2013-08-07 07:49:15	27.87	30.34		6.70766	-28.4098	-30.9276	2013-08-07 07:49:15
2013-08-07 07:59:15	27.89	30.35		6.7146	-28.4302	-30.9378
2013-08-07 08:09:15	27.92	30.38		6.72155	-28.4608	-30.9684
2013-08-07 08:19:15	27.82	30.27		6.72849	-28.3588	-30.8563
2013-08-07 08:29:15	27.91	30.36		6.73544	-28.4506	-30.948
2013-08-07 08:39:15	28	30.45		6.74238	-28.5423	-31.0398
2013-08-07 08:49:15	28.02	30.48		6.74933	-28.5627	-31.0703	2013-08-07 08:49:15
2013-08-07 08:59:15	28.05	30.52		6.75627	-28.5933	-31.1111
2013-08-07 09:09:15	28.06	30.53		6.76321	-28.6035	-31.1213
2013-08-07 09:19:15	28.08	30.54		6.77016	-28.6239	-31.1315
2013-08-07 09:29:15	28.14	30.61		6.7771	-28.685	-31.2029
2013-08-07 09:39:15	28.18	30.64		6.78405	-28.7258	-31.2334
2013-08-07 09:49:15	28.16	30.64		6.79099	-28.7054	-31.2334	2013-08-07 09:49:15
2013-08-07 09:59:15	28.21	30.66		6.79794	-28.7564	-31.2538
2013-08-07 10:09:15	28.21	30.69		6.80488	-28.7564	-31.2844
2013-08-07 10:19:15	28.26	30.72		6.81183	-28.8073	-31.315
2013-08-07 10:29:15	28.28	30.74		6.81877	-28.8277	-31.3354
2013-08-07 10:39:15	28.32	30.79		6.82571	-28.8685	-31.3863
2013-08-07 10:49:15	28.36	30.81		6.83266	-28.9093	-31.4067	2013-08-07 10:49:15
2013-08-07 10:59:15	28.35	30.81		6.8396	-28.8991	-31.4067
2013-08-07 11:09:15	28.37	30.84		6.84655	-28.9195	-31.4373
2013-08-07 11:19:15	28.4	30.85		6.85349	-28.9501	-31.4475
2013-08-07 11:29:15	28.44	30.9		6.86044	-28.9908	-31.4985
2013-08-07 11:39:15	28.44	30.89		6.86738	-28.9908	-31.4883
2013-08-07 11:49:15	28.51	30.97		6.87433	-29.0622	-31.5698	2013-08-07 11:49:15
2013-08-07 11:59:15	28.48	30.98		6.88127	-29.0316	-31.58
2013-08-07 12:09:15	28.53	30.99		6.88821	-29.0826	-31.5902
2013-08-07 12:19:15	28.57	31.03		6.89516	-29.1233	-31.631
2013-08-07 12:29:15	28.6	31.06		6.9021	-29.1539	-31.6616
2013-08-07 12:39:15	28.63	31.1		6.90905	-29.1845	-31.7023
2013-08-07 12:49:15	28.64	31.1		6.91599	-29.1947	-31.7023	2013-08-07 12:49:15
2013-08-07 12:59:15	28.67	31.13		6.92294	-29.2253	-31.7329
2013-08-07 13:09:15	28.67	31.13		6.92988	-29.2253	-31.7329
2013-08-07 13:19:15	28.6	31.07		6.93683	-29.1539	-31.6718
2013-08-07 13:29:15	28.66	31.12		6.94377	-29.2151	-31.7227
2013-08-07 13:39:15	28.72	31.17		6.95071	-29.2762	-31.7737
2013-08-07 13:49:15	28.71	31.16		6.95766	-29.2661	-31.7635	2013-08-07 13:49:15
2013-08-07 13:59:15	28.76	31.22		6.9646	-29.317	-31.8247
2013-08-07 14:09:15	28.79	31.24		6.97155	-29.3476	-31.8451
2013-08-07 14:19:15	28.83	31.29		6.97849	-29.3884	-31.896
2013-08-07 14:29:15	28.86	31.31		6.98544	-29.419	-31.9164
2013-08-07 14:39:15	28.88	31.35		6.99238	-29.4393	-31.9572
2013-08-07 14:49:15	28.89	31.35		6.99933	-29.4495	-31.9572	2013-08-07 14:49:15
2013-08-07 14:59:15	28.94	31.4		7.00627	-29.5005	-32.0082
2013-08-07 15:09:15	28.94	31.4		7.01321	-29.5005	-32.0082
2013-08-07 15:19:15	28.99	31.46		7.02016	-29.5515	-32.0693
2013-08-07 15:29:15	28.99	31.45		7.0271	-29.5515	-32.0591
2013-08-07 15:39:15	29.04	31.5		7.03405	-29.6024	-32.1101
2013-08-07 15:49:15	29.06	31.51		7.04099	-29.6228	-32.1203	2013-08-07 15:49:15
2013-08-07 15:59:15	29.09	31.54		7.04794	-29.6534	-32.1509
2013-08-07 16:09:15	29.1	31.56		7.05488	-29.6636	-32.1713
2013-08-07 16:19:15	29.13	31.59		7.06183	-29.6942	-32.2018
2013-08-07 16:29:15	29.14	31.6		7.06877	-29.7044	-32.212
2013-08-07 16:39:15	29.17	31.64		7.07571	-29.735	-32.2528
2013-08-07 16:49:15	29.19	31.63		7.08266	-29.7554	-32.2426	2013-08-07 16:49:15
2013-08-07 16:59:15	29.22	31.67		7.0896	-29.7859	-32.2834
2013-08-07 17:09:15	29.23	31.7		7.09655	-29.7961	-32.314
2013-08-07 17:19:15	29.25	31.7		7.10349	-29.8165	-32.314
2013-08-07 17:29:15	29.28	31.74		7.11044	-29.8471	-32.3547
2013-08-07 17:39:15	29.29	31.75		7.11738	-29.8573	-32.3649
2013-08-07 17:49:15	29.33	31.79		7.12433	-29.8981	-32.4057	2013-08-07 17:49:15
2013-08-07 17:59:15	29.34	31.79		7.13127	-29.9083	-32.4057
2013-08-07 18:09:15	29.37	31.83		7.13821	-29.9388	-32.4465
2013-08-07 18:19:15	29.36	31.82		7.14516	-29.9286	-32.4363
2013-08-07 18:29:15	29.37	31.85		7.1521	-29.9388	-32.4669
2013-08-07 18:39:15	29.42	31.88		7.15905	-29.9898	-32.4975
2013-08-07 18:49:15	29.43	31.89		7.16599	-30	-32.5076	2013-08-07 18:49:15
2013-08-07 18:59:15	29.48	31.94		7.17294	-30.051	-32.5586
2013-08-07 19:09:15	29.49	31.95		7.17988	-30.0612	-32.5688
2013-08-07 19:19:15	29.32	31.79		7.18683	-29.8879	-32.4057
2013-08-07 19:29:15	29.42	31.87		7.19377	-29.9898	-32.4873
2013-08-07 19:39:15	29.5	31.97		7.20071	-30.0714	-32.5892
2013-08-07 19:49:15	29.53	32		7.20766	-30.1019	-32.6198	2013-08-07 19:49:15
2013-08-07 19:59:15	29.57	32.03		7.2146	-30.1427	-32.6504
2013-08-07 20:09:15	29.58	32.03		7.22155	-30.1529	-32.6504
2013-08-07 20:19:15	29.61	32.07		7.22849	-30.1835	-32.6911
2013-08-07 20:29:15	29.64	32.1		7.23544	-30.2141	-32.7217
2013-08-07 20:39:15	29.67	32.13		7.24238	-30.2446	-32.7523
2013-08-07 20:49:15	29.68	32.13		7.24933	-30.2548	-32.7523	2013-08-07 20:49:15
2013-08-07 20:59:15	29.7	32.17		7.25627	-30.2752	-32.7931
2013-08-07 21:09:15	29.73	32.18		7.26321	-30.3058	-32.8033
2013-08-07 21:19:15	29.74	32.2		7.27016	-30.316	-32.8236
2013-08-07 21:29:15	29.79	32.26		7.2771	-30.367	-32.8848
2013-08-07 21:39:15	29.83	32.28		7.28405	-30.4077	-32.9052
2013-08-07 21:49:15	29.83	32.29		7.29099	-30.4077	-32.9154	2013-08-07 21:49:15
2013-08-07 21:59:15	29.89	32.34		7.29794	-30.4689	-32.9664
2013-08-07 22:09:15	29.89	32.34		7.30488	-30.4689	-32.9664
2013-08-07 22:19:15	29.91	32.37		7.31183	-30.4893	-32.9969
2013-08-07 22:29:15	29.94	32.41		7.31877	-30.5199	-33.0377
2013-08-07 22:39:15	29.95	32.4		7.32571	-30.5301	-33.0275
2013-08-07 22:49:15	29.98	32.45		7.33266	-30.5607	-33.0785	2013-08-07 22:49:15
2013-08-07 22:59:15	30	32.46		7.3396	-30.581	-33.0887
2013-08-07 23:09:15	30.03	32.49		7.34655	-30.6116	-33.1193
2013-08-07 23:19:15	30.08	32.53		7.35349	-30.6626	-33.16
2013-08-07 23:29:15	30.11	32.56		7.36044	-30.6932	-33.1906
2013-08-07 23:49:15	30.16	32.62		7.37433	-30.7441	-33.2518
2013-08-07 23:59:15	30.18	32.63		7.38127	-30.7645	-33.262	2013-08-07 23:59:15
2013-08-08 00:09:15	30.21	32.66		7.38821	-30.7951	-33.2926
2013-08-08 00:19:15	30.25	32.7		7.39516	-30.8359	-33.3333
2013-08-08 00:29:15	30.25	32.7		7.4021	-30.8359	-33.3333
2013-08-08 00:39:15	30.29	32.75		7.40905	-30.8767	-33.3843
2013-08-08 00:49:15	30.26	32.72		7.41599	-30.8461	-33.3537
2013-08-08 00:59:15	30.28	32.74		7.42294	-30.8665	-33.3741	2013-08-08 00:59:15
2013-08-08 01:09:15	30.3	32.75		7.42988	-30.8869	-33.3843
2013-08-08 01:19:15	30.32	32.78		7.43683	-30.9072	-33.4149
2013-08-08 01:29:15	30.35	32.8		7.44377	-30.9378	-33.4353
2013-08-08 01:39:15	30.34	32.8		7.45071	-30.9276	-33.4353
2013-08-08 01:49:15	30.36	32.82		7.45766	-30.948	-33.4557
2013-08-08 01:59:15	30.38	32.83		7.4646	-30.9684	-33.4659	2013-08-08 01:59:15
2013-08-08 02:09:15	30.42	32.9		7.47155	-31.0092	-33.5372
2013-08-08 02:19:15	30.46	32.92		7.47849	-31.0499	-33.5576
2013-08-08 02:29:15	30.46	32.92		7.48544	-31.0499	-33.5576
2013-08-08 02:39:15	30.49	32.95		7.49238	-31.0805	-33.5882
2013-08-08 02:49:15	30.52	32.97		7.49933	-31.1111	-33.6086
2013-08-08 02:59:15	30.53	32.99		7.50627	-31.1213	-33.629	2013-08-08 02:59:15
2013-08-08 03:09:15	30.58	33.05		7.51321	-31.1723	-33.6901
2013-08-08 03:19:15	30.61	33.06		7.52016	-31.2029	-33.7003
2013-08-08 03:29:15	30.61	33.08		7.5271	-31.2029	-33.7207
2013-08-08 03:39:15	30.66	33.1		7.53405	-31.2538	-33.7411
2013-08-08 03:49:15	30.67	33.09		7.54099	-31.264	-33.7309
2013-08-08 03:59:15	30.64	33.11		7.54794	-31.2334	-33.7513	2013-08-08 03:59:15
2013-08-08 04:09:15	30.71	33.17		7.55488	-31.3048	-33.8124
2013-08-08 04:19:15	30.72	33.18		7.56183	-31.315	-33.8226
2013-08-08 04:29:15	30.72	33.16		7.56877	-31.315	-33.8022
2013-08-08 04:39:15	30.75	33.22		7.57571	-31.3456	-33.8634
2013-08-08 04:49:15	30.76	33.22		7.58266	-31.3558	-33.8634
2013-08-08 04:59:15	30.77	33.22		7.5896	-31.366	-33.8634	2013-08-08 04:59:15
2013-08-08 05:09:15	30.79	33.24		7.59655	-31.3863	-33.8838
2013-08-08 05:19:15	30.83	33.28		7.60349	-31.4271	-33.9246
2013-08-08 05:29:15	30.86	33.32		7.61044	-31.4577	-33.9653
2013-08-08 05:39:15	30.86	33.32		7.61738	-31.4577	-33.9653
2013-08-08 05:49:15	30.93	33.38		7.62433	-31.5291	-34.0265
2013-08-08 05:59:15	30.91	33.38		7.63127	-31.5087	-34.0265	2013-08-08 05:59:15
2013-08-08 06:09:15	30.94	33.39		7.63821	-31.5392	-34.0367
2013-08-08 06:19:15	30.97	33.44		7.64516	-31.5698	-34.0877
2013-08-08 06:29:15	30.99	33.44		7.6521	-31.5902	-34.0877
2013-08-08 06:39:15	31	33.46		7.65905	-31.6004	-34.1081
2013-08-08 06:49:15	31.05	33.5		7.66599	-31.6514	-34.1488
2013-08-08 06:59:15	31.08	33.53		7.67294	-31.682	-34.1794	2013-08-08 06:59:15
2013-08-08 07:09:15	31.09	33.55		7.67988	-31.6922	-34.1998
2013-08-08 07:19:15	31.12	33.57		7.68683	-31.7227	-34.2202
2013-08-08 07:29:15	31.16	33.62		7.69377	-31.7635	-34.2712
2013-08-08 07:39:15	31.18	33.63		7.70071	-31.7839	-34.2813
2013-08-08 07:49:15	31.18	33.64		7.70766	-31.7839	-34.2915
2013-08-08 07:59:15	31.2	33.67		7.7146	-31.8043	-34.3221	2013-08-08 07:59:15
2013-08-08 08:09:15	31.22	33.69		7.72155	-31.8247	-34.3425
2013-08-08 08:19:15	31.25	33.7		7.72849	-31.8552	-34.3527
2013-08-08 08:29:15	31.24	33.71		7.73544	-31.8451	-34.3629
2013-08-08 08:39:15	31.34	33.8		7.74238	-31.947	-34.4546
2013-08-08 08:49:15	31.36	33.82		7.74933	-31.9674	-34.475
2013-08-08 08:59:15	31.42	33.87		7.75627	-32.0285	-34.526	2013-08-08 08:59:15
2013-08-08 09:09:15	31.43	33.89		7.76321	-32.0387	-34.5464
2013-08-08 09:19:15	31.39	33.85		7.77016	-31.998	-34.5056
2013-08-08 09:29:15	31.44	33.88		7.7771	-32.0489	-34.5362
2013-08-08 09:39:15	31.44	33.9		7.78405	-32.0489	-34.5566
2013-08-08 09:49:15	31.46	33.93		7.79099	-32.0693	-34.5872
2013-08-08 09:59:15	31.51	33.99		7.79794	-32.1203	-34.6483	2013-08-08 09:59:15
2013-08-08 10:09:15	31.56	34		7.80488	-32.1713	-34.6585
2013-08-08 10:19:15	31.58	34.04		7.81183	-32.1916	-34.6993
2013-08-08 10:29:15	31.62	34.07		7.81877	-32.2324	-34.7299
2013-08-08 10:39:15	31.65	34.11		7.82571	-32.263	-34.7706
2013-08-08 10:49:15	31.68	34.13		7.83266	-32.2936	-34.791
2013-08-08 10:59:15	31.7	34.15		7.8396	-32.314	-34.8114	2013-08-08 10:59:15
2013-08-08 11:09:15	31.75	34.21		7.84655	-32.3649	-34.8726
2013-08-08 11:19:15	31.78	34.24		7.85349	-32.3955	-34.9032
2013-08-08 11:29:15	31.78	34.25		7.86044	-32.3955	-34.9134
2013-08-08 11:39:15	31.81	34.26		7.86738	-32.4261	-34.9235
2013-08-08 11:49:15	31.86	34.33		7.87433	-32.4771	-34.9949
2013-08-08 11:59:15	31.87	34.34		7.88127	-32.4873	-35.0051	2013-08-08 11:59:15
2013-08-08 12:09:15	31.9	34.37		7.88821	-32.5178	-35.0357
2013-08-08 12:19:15	31.95	34.4		7.89516	-32.5688	-35.0663
2013-08-08 12:29:15	31.99	34.45		7.9021	-32.6096	-35.1172
2013-08-08 12:39:15	32.02	34.48		7.90905	-32.6402	-35.1478
2013-08-08 12:49:15	32.08	34.54		7.91599	-32.7013	-35.209
2013-08-08 12:59:15	32.09	34.55		7.92294	-32.7115	-35.2192	2013-08-08 12:59:15
2013-08-08 13:09:15	32.12	34.56		7.92988	-32.7421	-35.2294
2013-08-08 13:19:15	32.17	34.63		7.93683	-32.7931	-35.3007
2013-08-08 13:29:15	32.19	34.64		7.94377	-32.8135	-35.3109
2013-08-08 13:39:15	32.2	34.65		7.95071	-32.8236	-35.3211
2013-08-08 13:49:15	32.26	34.72		7.95766	-32.8848	-35.3925
2013-08-08 13:59:15	32.29	34.74		7.9646	-32.9154	-35.4128	2013-08-08 13:59:15
2013-08-08 14:09:15	32.32	34.78		7.97155	-32.946	-35.4536
2013-08-08 14:19:15	32.38	34.84		7.97849	-33.0071	-35.5148
2013-08-08 14:29:15	32.42	34.88		7.98544	-33.0479	-35.5556
2013-08-08 14:39:15	32.44	34.9		7.99238	-33.0683	-35.5759
2013-08-08 14:49:15	32.47	34.92		7.99933	-33.0989	-35.5963
2013-08-08 14:59:15	32.52	34.98		8.00627	-33.1498	-35.6575	2013-08-08 14:59:15
2013-08-08 15:09:15	32.55	35		8.01321	-33.1804	-35.6779
2013-08-08 15:19:15	32.55	35.02		8.02016	-33.1804	-35.6983
2013-08-08 15:29:15	32.61	35.07		8.0271	-33.2416	-35.7492
2013-08-08 15:39:15	32.64	35.1		8.03405	-33.2722	-35.7798
2013-08-08 15:49:15	32.68	35.14		8.04099	-33.3129	-35.8206
2013-08-08 15:59:15	32.69	35.15		8.04794	-33.3231	-35.8308	2013-08-08 15:59:15
2013-08-08 16:09:15	32.76	35.22		8.05488	-33.3945	-35.9021
2013-08-08 16:19:15	32.79	35.24		8.06183	-33.4251	-35.9225
2013-08-08 16:29:15	32.83	35.28		8.06877	-33.4659	-35.9633
2013-08-08 16:39:15	32.86	35.31		8.07571	-33.4964	-35.9939
2013-08-08 16:49:15	32.92	35.37		8.08266	-33.5576	-36.055
2013-08-08 16:59:15	32.93	35.38		8.0896	-33.5678	-36.0652	2013-08-08 16:59:15
2013-08-08 17:09:15	32.95	35.4		8.09655	-33.5882	-36.0856
2013-08-08 17:19:15	32.97	35.43		8.10349	-33.6086	-36.1162
2013-08-08 17:29:15	33.04	35.49		8.11044	-33.6799	-36.1774
2013-08-08 17:39:15	33.05	35.5		8.11738	-33.6901	-36.1876
2013-08-08 17:59:15	33.13	35.59		8.13127	-33.7717	-36.2793
2013-08-08 18:19:15	33.18	35.64		8.14516	-33.8226	-36.3303	2013-08-08 18:19:15
2013-08-08 18:29:15	33.24	35.67		8.1521	-33.8838	-36.3609
2013-08-08 18:39:15	33.26	35.71		8.15905	-33.9042	-36.4016
2013-08-08 18:49:15	33.29	35.76		8.16599	-33.9348	-36.4526
2013-08-08 18:59:15	33.36	35.81		8.17294	-34.0061	-36.5036
2013-08-08 19:09:15	33.38	35.83		8.17988	-34.0265	-36.524
2013-08-08 19:19:15	33.44	35.88		8.18683	-34.0877	-36.5749	2013-08-08 19:19:15
2013-08-08 19:29:15	33.46	35.91		8.19377	-34.1081	-36.6055
2013-08-08 19:39:15	33.47	35.93		8.20071	-34.1182	-36.6259
2013-08-08 19:49:15	33.53	36		8.20766	-34.1794	-36.6972
2013-08-08 19:59:15	33.4	35.85		8.2146	-34.0469	-36.5443
2013-08-08 20:09:15	33.5	35.96		8.22155	-34.1488	-36.6565
2013-08-08 20:19:15	33.55	36.01		8.22849	-34.1998	-36.7074	2013-08-08 20:19:15
2013-08-08 20:29:15	33.65	36.1		8.23544	-34.3017	-36.7992
2013-08-08 20:39:15	33.68	36.13		8.24238	-34.3323	-36.8298
2013-08-08 20:49:15	33.7	36.15		8.24933	-34.3527	-36.8502
2013-08-08 20:59:15	33.74	36.21		8.25627	-34.3935	-36.9113
2013-08-08 21:09:15	33.8	36.26		8.26321	-34.4546	-36.9623
2013-08-08 21:19:15	33.86	36.31		8.27016	-34.5158	-37.0133	2013-08-08 21:19:15
2013-08-08 21:29:15	33.87	36.33		8.2771	-34.526	-37.0336
2013-08-08 21:39:15	33.9	36.35		8.28405	-34.5566	-37.054
2013-08-08 21:49:15	33.97	36.43		8.29099	-34.6279	-37.1356
2013-08-08 21:59:15	33.99	36.46		8.29794	-34.6483	-37.1662
2013-08-08 22:09:15	34.03	36.5		8.30488	-34.6891	-37.2069
2013-08-08 22:19:15	34.07	36.53		8.31183	-34.7299	-37.2375	2013-08-08 22:19:15
2013-08-08 22:29:15	34.11	36.56		8.31877	-34.7706	-37.2681
2013-08-08 22:39:15	34.2	36.65		8.32571	-34.8624	-37.3598
2013-08-08 22:49:15	34.22	36.67		8.33266	-34.8828	-37.3802
2013-08-08 22:59:15	34.25	36.72		8.3396	-34.9134	-37.4312
2013-08-08 23:09:15	34.3	36.75		8.34655	-34.9643	-37.4618
2013-08-08 23:19:15	34.31	36.78		8.35349	-34.9745	-37.4924	2013-08-08 23:19:15
2013-08-08 23:29:15	34.36	36.83		8.36044	-35.0255	-37.5433
2013-08-08 23:39:15	34.41	36.87		8.36738	-35.0765	-37.5841
2013-08-08 23:49:15	34.45	36.9		8.37433	-35.1172	-37.6147
2013-08-08 23:59:15	34.47	36.93		8.38127	-35.1376	-37.6453
2013-08-09 00:09:15	34.5	36.96		8.38821	-35.1682	-37.6758
2013-08-09 00:19:15	34.52	36.98		8.39516	-35.1886	-37.6962	2013-08-09 00:19:15
2013-08-09 00:29:15	34.57	37.03		8.4021	-35.2396	-37.7472
2013-08-09 00:39:15	34.59	37.06		8.40905	-35.2599	-37.7778
2013-08-09 00:49:15	34.65	37.11		8.41599	-35.3211	-37.8287
2013-08-09 00:59:15	34.73	37.18		8.42294	-35.4027	-37.9001
2013-08-09 01:09:15	34.76	37.21		8.42988	-35.4332	-37.9307
2013-08-09 01:19:15	34.81	37.27		8.43683	-35.4842	-37.9918	2013-08-09 01:19:15
2013-08-09 01:29:15	34.84	37.31		8.44377	-35.5148	-38.0326
2013-08-09 01:39:15	34.85	37.3		8.45071	-35.525	-38.0224
2013-08-09 01:49:15	34.88	37.34		8.45766	-35.5556	-38.0632
2013-08-09 01:59:15	34.93	37.39		8.4646	-35.6065	-38.1142
2013-08-09 02:09:15	34.97	37.43		8.47155	-35.6473	-38.1549
2013-08-09 02:19:15	34.99	37.44		8.47849	-35.6677	-38.1651	2013-08-09 02:19:15
2013-08-09 02:29:15	35.05	37.51		8.48544	-35.7288	-38.2365
2013-08-09 02:39:15	35.08	37.55		8.49238	-35.7594	-38.2773
2013-08-09 02:49:15	35.12	37.6		8.49933	-35.8002	-38.3282
2013-08-09 02:59:15	35.19	37.64		8.50627	-35.8716	-38.369
2013-08-09 03:09:15	35.22	37.68		8.51321	-35.9021	-38.4098
2013-08-09 03:19:15	35.27	37.71		8.52016	-35.9531	-38.4404	2013-08-09 03:19:15
2013-08-09 03:29:15	35.31	37.75		8.5271	-35.9939	-38.4811
2013-08-09 03:39:15	35.34	37.8		8.53405	-36.0245	-38.5321
2013-08-09 03:49:15	35.37	37.83		8.54099	-36.055	-38.5627
2013-08-09 03:59:15	35.42	37.88		8.54794	-36.106	-38.6137
2013-08-09 04:09:15	35.47	37.92		8.55488	-36.157	-38.6544
2013-08-09 04:19:15	35.51	37.96		8.56183	-36.1978	-38.6952	2013-08-09 04:19:15
2013-08-09 04:29:15	35.55	38.01		8.56877	-36.2385	-38.7462
2013-08-09 04:39:15	35.6	38.05		8.57571	-36.2895	-38.787
2013-08-09 04:49:15	35.64	38.1		8.58266	-36.3303	-38.8379
2013-08-09 04:59:15	35.69	38.15		8.5896	-36.3812	-38.8889
2013-08-09 05:09:15	35.73	38.2		8.59655	-36.422	-38.9399
2013-08-09 05:19:15	35.78	38.25		8.60349	-36.473	-38.9908	2013-08-09 05:19:15
2013-08-09 05:29:15	35.8	38.28		8.61044	-36.4934	-39.0214
2013-08-09 05:49:15	35.93	38.4		8.62433	-36.6259	-39.1437
2013-08-09 05:59:15	35.97	38.43		8.63127	-36.6667	-39.1743
2013-08-09 06:09:15	36	38.48		8.63821	-36.6972	-39.2253
2013-08-09 06:19:15	36.07	38.53		8.64516	-36.7686	-39.2762
2013-08-09 06:29:15	36.11	38.57		8.6521	-36.8094	-39.317	2013-08-09 06:29:15
2013-08-09 06:39:15	36.17	38.64		8.65905	-36.8705	-39.3884
2013-08-09 06:49:15	36.24	38.69		8.66599	-36.9419	-39.4393
2013-08-09 06:59:15	36.26	38.72		8.67294	-36.9623	-39.4699
2013-08-09 07:09:15	36.29	38.76		8.67988	-36.9929	-39.5107
2013-08-09 07:19:15	36.34	38.8		8.68683	-37.0438	-39.5515
2013-08-09 07:29:15	36.34	38.8		8.69377	-37.0438	-39.5515	2013-08-09 07:29:15
2013-08-09 07:39:15	36.35	38.81		8.70071	-37.054	-39.5617
2013-08-09 07:49:15	36.37	38.82		8.70766	-37.0744	-39.5719
2013-08-09 07:59:15	36.41	38.87		8.7146	-37.1152	-39.6228
2013-08-09 08:09:15	36.44	38.9		8.72155	-37.1458	-39.6534
2013-08-09 08:19:15	36.52	38.99		8.72849	-37.2273	-39.7452
2013-08-09 08:29:15	36.56	39		8.73544	-37.2681	-39.7554	2013-08-09 08:29:15
2013-08-09 08:39:15	36.59	39.04		8.74238	-37.2987	-39.7961
2013-08-09 08:49:15	36.62	39.07		8.74933	-37.3293	-39.8267
2013-08-09 08:59:15	36.66	39.12		8.75627	-37.37	-39.8777
2013-08-09 09:09:15	36.7	39.19		8.76321	-37.4108	-39.949
2013-08-09 09:19:15	36.67	39.13		8.77016	-37.3802	-39.8879
2013-08-09 09:29:15	36.81	39.26		8.7771	-37.5229	-40.0204	2013-08-09 09:29:15
2013-08-09 09:39:15	36.88	39.34		8.78405	-37.5943	-40.1019
2013-08-09 09:49:15	36.94	39.41		8.79099	-37.6555	-40.1733
2013-08-09 09:59:15	37.01	39.46		8.79794	-37.7268	-40.2243
2013-08-09 10:09:15	37.04	39.5		8.80488	-37.7574	-40.265
2013-08-09 10:19:15	37.15	39.6		8.81183	-37.8695	-40.367
2013-08-09 10:29:15	37.19	39.63		8.81877	-37.9103	-40.3976	2013-08-09 10:29:15
2013-08-09 10:39:15	37.25	39.71		8.82571	-37.9715	-40.4791
2013-08-09 10:49:15	37.28	39.72		8.83266	-38.002	-40.4893
2013-08-09 10:59:15	37.32	39.8		8.8396	-38.0428	-40.5708
2013-08-09 11:09:15	37.39	39.83		8.84655	-38.1142	-40.6014
2013-08-09 11:19:15	37.44	39.89		8.85349	-38.1651	-40.6626
2013-08-09 11:29:15	37.5	39.96		8.86044	-38.2263	-40.7339	2013-08-09 11:29:15
2013-08-09 11:39:15	37.55	39.99		8.86738	-38.2773	-40.7645
2013-08-09 11:49:15	37.61	40.08		8.87433	-38.3384	-40.8563
2013-08-09 11:59:15	37.67	40.09		8.88127	-38.3996	-40.8665
2013-08-09 12:09:15	37.73	40.2		8.88821	-38.4608	-40.9786
2013-08-09 12:19:15	37.77	40.23		8.89516	-38.5015	-41.0092
2013-08-09 12:29:15	37.85	40.31		8.9021	-38.5831	-41.0907	2013-08-09 12:29:15
2013-08-09 12:39:15	37.91	40.35		8.90905	-38.6442	-41.1315
2013-08-09 12:49:15	37.96	40.43		8.91599	-38.6952	-41.213
2013-08-09 12:59:15	37.96	40.44		8.92294	-38.6952	-41.2232
2013-08-09 13:09:15	38	40.47		8.92988	-38.736	-41.2538
2013-08-09 13:19:15	38.1	40.54		8.93683	-38.8379	-41.3252
2013-08-09 13:29:15	38.16	40.63		8.94377	-38.8991	-41.4169	2013-08-09 13:29:15
2013-08-09 13:39:15	38.23	40.69		8.95071	-38.9704	-41.4781
2013-08-09 13:49:15	38.27	40.72		8.95766	-39.0112	-41.5087
2013-08-09 13:59:15	38.34	40.79		8.9646	-39.0826	-41.58
2013-08-09 14:09:15	38.39	40.86		8.97155	-39.1335	-41.6514
2013-08-09 14:19:15	38.47	40.92		8.97849	-39.2151	-41.7125
2013-08-09 14:29:15	38.52	40.97		8.98544	-39.2661	-41.7635	2013-08-09 14:29:15
2013-08-09 14:39:15	38.59	41.06		8.99238	-39.3374	-41.8552
2013-08-09 14:49:15	38.61	41.08		8.99933	-39.3578	-41.8756
2013-08-09 14:59:15	38.7	41.16		9.00627	-39.4495	-41.9572
2013-08-09 15:09:15	38.8	41.26		9.01321	-39.5515	-42.0591
2013-08-09 15:19:15	38.84	41.29		9.02016	-39.5923	-42.0897
2013-08-09 15:29:15	38.87	41.32		9.0271	-39.6228	-42.1203	2013-08-09 15:29:15
2013-08-09 15:39:15	38.96	41.39		9.03405	-39.7146	-42.1916
2013-08-09 15:49:15	39	41.47		9.04099	-39.7554	-42.2732
2013-08-09 15:59:15	39.07	41.54		9.04794	-39.8267	-42.3445
2013-08-09 16:09:15	39.16	41.63		9.05488	-39.9185	-42.4363
2013-08-09 16:19:15	39.19	41.65		9.06183	-39.949	-42.4567
2013-08-09 16:29:15	39.26	41.7		9.06877	-40.0204	-42.5076	2013-08-09 16:29:15
2013-08-09 16:39:15	39.34	41.82		9.07571	-40.1019	-42.63
2013-08-09 16:49:15	39.43	41.89		9.08266	-40.1937	-42.7013
2013-08-09 16:59:15	39.47	41.96		9.0896	-40.2345	-42.7727
2013-08-09 17:09:15	39.57	42.04		9.09655	-40.3364	-42.8542
2013-08-09 17:19:15	39.64	42.11		9.10349	-40.4077	-42.9256
2013-08-09 17:29:15	39.71	42.19		9.11044	-40.4791	-43.0071	2013-08-09 17:29:15
2013-08-09 17:39:15	39.77	42.25		9.11738	-40.5403	-43.0683
2013-08-09 17:49:15	39.83	42.3		9.12433	-40.6014	-43.1193
2013-08-09 17:59:15	39.93	42.4		9.13127	-40.7034	-43.2212
2013-08-09 18:09:15	40.02	42.5		9.13821	-40.7951	-43.3231
2013-08-09 18:19:15	40.06	42.56		9.14516	-40.8359	-43.3843
2013-08-09 18:29:15	40.15	42.6		9.1521	-40.9276	-43.4251	2013-08-09 18:29:15
2013-08-09 18:39:15	40.08	42.54		9.15905	-40.8563	-43.3639
2013-08-09 18:49:15	40.18	42.67		9.16599	-40.9582	-43.4964
2013-08-09 18:59:15	40.27	42.75		9.17294	-41.0499	-43.578
2013-08-09 19:09:15	40.33	42.82		9.17988	-41.1111	-43.6493
2013-08-09 19:19:15	40.42	42.9		9.18683	-41.2029	-43.7309
2013-08-09 19:29:15	40.52	42.98		9.19377	-41.3048	-43.8124	2013-08-09 19:29:15
2013-08-09 19:39:15	40.57	43.03		9.20071	-41.3558	-43.8634
2013-08-09 19:49:15	40.62	43.11		9.20766	-41.4067	-43.945
2013-08-09 19:59:15	40.71	43.18		9.2146	-41.4985	-44.0163
2013-08-09 20:09:15	40.8	43.29		9.22155	-41.5902	-44.1284
2013-08-09 20:19:15	40.85	43.31		9.22849	-41.6412	-44.1488
2013-08-09 20:29:15	40.92	43.39		9.23544	-41.7125	-44.2304	2013-08-09 20:29:15
2013-08-09 20:39:15	40.97	43.45		9.24238	-41.7635	-44.2915
2013-08-09 20:49:15	41.04	43.52		9.24933	-41.8349	-44.3629
2013-08-09 20:59:15	41.1	43.57		9.25627	-41.896	-44.4139
2013-08-09 21:09:15	41.18	43.64		9.26321	-41.9776	-44.4852
2013-08-09 21:19:15	41.21	43.69		9.27016	-42.0082	-44.5362
2013-08-09 21:29:15	41.28	43.76		9.2771	-42.0795	-44.6075	2013-08-09 21:29:15
2013-08-09 21:39:15	41.37	43.84		9.28405	-42.1713	-44.6891
2013-08-09 21:49:15	41.44	43.89		9.29099	-42.2426	-44.7401
2013-08-09 21:59:15	41.47	43.93		9.29794	-42.2732	-44.7808
2013-08-09 22:09:15	41.54	44.03		9.30488	-42.3445	-44.8828
2013-08-09 22:19:15	41.6	44.08		9.31183	-42.4057	-44.9337
2013-08-09 22:29:15	41.64	44.12		9.31877	-42.4465	-44.9745	2013-08-09 22:29:15
2013-08-09 22:39:15	41.71	44.2		9.32571	-42.5178	-45.0561
2013-08-09 22:49:15	41.78	44.26		9.33266	-42.5892	-45.1172
2013-08-09 22:59:15	41.84	44.31		9.3396	-42.6504	-45.1682
2013-08-09 23:09:15	41.93	44.4		9.34655	-42.7421	-45.2599
2013-08-09 23:19:15	41.96	44.42		9.35349	-42.7727	-45.2803
2013-08-09 23:29:15	42.05	44.55		9.36044	-42.8644	-45.4128	2013-08-09 23:29:15
2013-08-09 23:39:15	42.1	44.57		9.36738	-42.9154	-45.4332
2013-08-09 23:49:15	42.13	44.6		9.37433	-42.946	-45.4638
2013-08-09 23:59:15	42.18	44.66		9.38127	-42.9969	-45.525
2013-08-10 00:09:15	42.22	44.63		9.38821	-43.0377	-45.4944
2013-08-10 00:19:15	42.28	44.76		9.39516	-43.0989	-45.6269
2013-08-10 00:29:15	42.33	44.83		9.4021	-43.1498	-45.6983	2013-08-10 00:29:15
2013-08-10 00:39:15	42.45	44.93		9.40905	-43.2722	-45.8002
2013-08-10 00:49:15	42.5	44.97		9.41599	-43.3231	-45.841
2013-08-10 00:59:15	42.54	44.9		9.42294	-43.3639	-45.7696
2013-08-10 01:09:15	42.62	45.09		9.42988	-43.4455	-45.9633
2013-08-10 01:19:15	42.7	45.19		9.43683	-43.527	-46.0652
2013-08-10 01:29:15	42.77	45.25		9.44377	-43.5984	-46.1264	2013-08-10 01:29:15
2013-08-10 01:39:15	42.81	45.33		9.45071	-43.6391	-46.208
2013-08-10 01:49:15	42.91	45.41		9.45766	-43.7411	-46.2895
2013-08-10 01:59:15	42.96	45.46		9.4646	-43.792	-46.3405
2013-08-10 02:09:15	43.05	45.53		9.47155	-43.8838	-46.4118
2013-08-10 02:19:15	43.09	45.59		9.47849	-43.9246	-46.473
2013-08-10 02:29:15	43.2	45.7		9.48544	-44.0367	-46.5851	2013-08-10 02:29:15
2013-08-10 02:39:15	43.27	45.75		9.49238	-44.1081	-46.6361
2013-08-10 02:49:15	43.32	45.8		9.49933	-44.159	-46.6871
2013-08-10 02:59:15	43.39	45.87		9.50627	-44.2304	-46.7584
2013-08-10 03:09:15	43.47	45.96		9.51321	-44.3119	-46.8502
2013-08-10 03:19:15	43.55	46.02		9.52016	-44.3935	-46.9113
2013-08-10 03:29:15	43.59	46.09		9.5271	-44.4343	-46.9827	2013-08-10 03:29:15
2013-08-10 03:39:15	43.68	46.16		9.53405	-44.526	-47.054
2013-08-10 03:49:15	43.77	46.25		9.54099	-44.6177	-47.1458
2013-08-10 03:59:15	43.82	46.3		9.54794	-44.6687	-47.1967
2013-08-10 04:09:15	43.9	46.39		9.55488	-44.7503	-47.2885
2013-08-10 04:19:15	43.96	46.47		9.56183	-44.8114	-47.37
2013-08-10 04:29:15	44.02	46.52		9.56877	-44.8726	-47.421	2013-08-10 04:29:15
2013-08-10 04:39:15	44.11	46.59		9.57571	-44.9643	-47.4924
2013-08-10 04:49:15	44.13	46.67		9.58266	-44.9847	-47.5739
2013-08-10 04:59:15	44.24	46.74		9.5896	-45.0968	-47.6453
2013-08-10 05:09:15	44.31	46.8		9.59655	-45.1682	-47.7064
2013-08-10 05:19:15	44.38	46.87		9.60349	-45.2396	-47.7778
2013-08-10 05:29:15	44.42	46.93		9.61044	-45.2803	-47.8389	2013-08-10 05:29:15
2013-08-10 05:39:15	44.52	47.01		9.61738	-45.3823	-47.9205
2013-08-10 05:49:15	44.59	47.08		9.62433	-45.4536	-47.9918
2013-08-10 05:59:15	44.66	47.16		9.63127	-45.525	-48.0734
2013-08-10 06:09:15	44.74	47.23		9.63821	-45.6065	-48.1448
2013-08-10 06:19:15	44.83	47.32		9.64516	-45.6983	-48.2365
2013-08-10 06:29:15	44.89	47.38		9.6521	-45.7594	-48.2977	2013-08-10 06:29:15
2013-08-10 06:39:15	44.94	47.44		9.65905	-45.8104	-48.3588
2013-08-10 06:49:15	45.02	47.51		9.66599	-45.8919	-48.4302
2013-08-10 06:59:15	45.11	47.6		9.67294	-45.9837	-48.5219
2013-08-10 07:09:15	45.17	47.65		9.67988	-46.0449	-48.5729
2013-08-10 07:19:15	45.24	47.72		9.68683	-46.1162	-48.6442
2013-08-10 07:29:15	45.27	47.78		9.69377	-46.1468	-48.7054	2013-08-10 07:29:15
2013-08-10 07:39:15	45.36	47.85		9.70071	-46.2385	-48.7768
2013-08-10 07:49:15	45.45	47.94		9.70766	-46.3303	-48.8685
2013-08-10 07:59:15	45.52	48		9.7146	-46.4016	-48.9297
2013-08-10 08:09:15	45.59	48.08		9.72155	-46.473	-49.0112
2013-08-10 08:19:15	45.67	48.21		9.72849	-46.5545	-49.1437
2013-08-10 08:29:15	45.79	48.27		9.73544	-46.6769	-49.2049	2013-08-10 08:29:15
2013-08-10 08:39:15	45.83	48.33		9.74238	-46.7176	-49.2661
2013-08-10 08:49:15	45.91	48.39		9.74933	-46.7992	-49.3272
2013-08-10 08:59:15	46	48.49		9.75627	-46.8909	-49.4292
2013-08-10 09:09:15	46.06	48.55		9.76321	-46.9521	-49.4903
2013-08-10 09:19:15	46.12	48.62		9.77016	-47.0133	-49.5617
2013-08-10 09:29:15	46.12	48.64		9.7771	-47.0133	-49.5821	2013-08-10 09:29:15
2013-08-10 09:39:15	46.25	48.73		9.78405	-47.1458	-49.6738
2013-08-10 09:49:15	46.31	48.79		9.79099	-47.2069	-49.735
2013-08-10 09:59:15	46.39	48.89		9.79794	-47.2885	-49.8369
2013-08-10 10:09:15	46.47	48.96		9.80488	-47.37	-49.9083
2013-08-10 10:19:15	46.54	49.02		9.81183	-47.4414	-49.9694
2013-08-10 10:29:15	46.64	49.14		9.81877	-47.5433	-50.0917	2013-08-10 10:29:15
2013-08-10 10:39:15	46.71	49.18		9.82571	-47.6147	-50.1325
2013-08-10 10:49:15	46.81	49.31		9.83266	-47.7166	-50.265
2013-08-10 10:59:15	46.85	49.35		9.8396	-47.7574	-50.3058
2013-08-10 11:09:15	46.95	49.42		9.84655	-47.8593	-50.3772
2013-08-10 11:19:15	47	49.48		9.85349	-47.9103	-50.4383
2013-08-10 11:29:15	47.1	49.59		9.86044	-48.0122	-50.5505	2013-08-10 11:29:15
2013-08-10 11:39:15	47.16	49.63		9.86738	-48.0734	-50.5912
2013-08-10 11:49:15	47.25	49.74		9.87433	-48.1651	-50.7034
2013-08-10 11:59:15	47.3	49.78		9.88127	-48.2161	-50.7441
2013-08-10 12:09:15	47.4	49.9		9.88821	-48.318	-50.8665
2013-08-10 12:19:15	47.46	49.96		9.89516	-48.3792	-50.9276
2013-08-10 12:29:15	47.56	50.07		9.9021	-48.4811	-51.0398	2013-08-10 12:29:15
2013-08-10 12:39:15	47.63	50.11		9.90905	-48.5525	-51.0805
2013-08-10 12:49:15	47.7	50.21		9.91599	-48.6239	-51.1825
2013-08-10 12:59:15	47.78	50.27		9.92294	-48.7054	-51.2436
2013-08-10 13:09:15	47.86	50.37		9.92988	-48.787	-51.3456
2013-08-10 13:19:15	47.95	50.46		9.93683	-48.8787	-51.4373
2013-08-10 13:29:15	48	50.48		9.94377	-48.9297	-51.4577	2013-08-10 13:29:15
2013-08-10 13:39:15	48.08	50.59		9.95071	-49.0112	-51.5698
2013-08-10 13:49:15	48.14	50.63		9.95766	-49.0724	-51.6106
2013-08-10 13:59:15	48.24	50.76		9.9646	-49.1743	-51.7431
2013-08-10 14:09:15	48.31	50.82		9.97155	-49.2457	-51.8043
2013-08-10 14:19:15	48.4	50.89		9.97849	-49.3374	-51.8756
2013-08-10 14:29:15	48.46	50.94		9.98544	-49.3986	-51.9266	2013-08-10 14:29:15
2013-08-10 14:39:15	48.58	51.08		9.99238	-49.5209	-52.0693
2013-08-10 14:49:15	48.66	51.17		9.99933	-49.6024	-52.1611
2013-08-10 14:59:15	48.72	51.21		10.0063	-49.6636	-52.2018
2013-08-10 15:09:15	48.85	51.35		10.0132	-49.7961	-52.3445
2013-08-10 15:19:15	48.92	51.42		10.0202	-49.8675	-52.4159
2013-08-10 15:29:15	49	51.51		10.0271	-49.949	-52.5076	2013-08-10 15:29:15
2013-08-10 15:39:15	49.06	51.59		10.034	-50.0102	-52.5892
2013-08-10 15:49:15	49.15	51.66		10.041	-50.1019	-52.6606
2013-08-10 15:59:15	49.26	51.75		10.0479	-50.2141	-52.7523
2013-08-10 16:09:15	49.28	51.82		10.0549	-50.2345	-52.8236
2013-08-10 16:19:15	49.42	51.96		10.0618	-50.3772	-52.9664
2013-08-10 16:29:15	49.56	52.07		10.0688	-50.5199	-53.0785	2013-08-10 16:29:15
2013-08-10 16:39:15	49.67	52.19		10.0757	-50.632	-53.2008
2013-08-10 16:49:15	49.76	52.24		10.0827	-50.7238	-53.2518
2013-08-10 16:59:15	49.85	52.36		10.0896	-50.8155	-53.3741
2013-08-10 17:09:15	49.93	52.46		10.0965	-50.897	-53.476
2013-08-10 17:19:15	50.02	52.48		10.1035	-50.9888	-53.4964
2013-08-10 17:29:15	49.83	52.34		10.1104	-50.7951	-53.3537	2013-08-10 17:29:15
2013-08-10 17:39:15	50.11	52.62		10.1174	-51.0805	-53.6391
2013-08-10 17:49:15	50.21	52.68		10.1243	-51.1825	-53.7003
2013-08-10 17:59:15	50.32	52.8		10.1313	-51.2946	-53.8226
2013-08-10 18:09:15	50.43	52.9		10.1382	-51.4067	-53.9246
2013-08-10 18:19:15	50.53	53.02		10.1452	-51.5087	-54.0469
2013-08-10 18:29:15	50.61	53.12		10.1521	-51.5902	-54.1488	2013-08-10 18:29:15
2013-08-10 18:39:15	50.74	53.23		10.159	-51.7227	-54.261
2013-08-10 18:49:15	50.85	53.34		10.166	-51.8349	-54.3731
2013-08-10 18:59:15	50.96	53.46		10.1729	-51.947	-54.4954
2013-08-10 19:09:15	51.1	53.56		10.1799	-52.0897	-54.5973
2013-08-10 19:19:15	51.16	53.66		10.1868	-52.1509	-54.6993
2013-08-10 19:29:15	51.23	53.71		10.1938	-52.2222	-54.7503	2013-08-10 19:29:15
2013-08-10 19:39:15	51.34	53.85		10.2007	-52.3344	-54.893
2013-08-10 19:49:15	51.44	53.91		10.2077	-52.4363	-54.9541
2013-08-10 19:59:15	51.51	54.02		10.2146	-52.5076	-55.0663
2013-08-10 20:09:15	51.62	54.08		10.2215	-52.6198	-55.1274
2013-08-10 20:19:15	51.71	54.15		10.2285	-52.7115	-55.1988
2013-08-10 20:29:15	51.75	54.27		10.2354	-52.7523	-55.3211	2013-08-10 20:29:15
2013-08-10 20:39:15	51.87	54.35		10.2424	-52.8746	-55.4027
2013-08-10 20:49:15	51.97	54.49		10.2493	-52.9766	-55.5454
2013-08-10 20:59:15	52.07	54.56		10.2563	-53.0785	-55.6167
2013-08-10 21:09:15	52.13	54.61		10.2632	-53.1397	-55.6677
2013-08-10 21:19:15	52.23	54.73		10.2702	-53.2416	-55.79
2013-08-10 21:29:15	52.36	54.81		10.2771	-53.3741	-55.8716	2013-08-10 21:29:15
2013-08-10 21:39:15	52.42	54.91		10.284	-53.4353	-55.9735
2013-08-10 21:49:15	52.5	54.98		10.291	-53.5168	-56.0449
2013-08-10 21:59:15	52.62	55.1		10.2979	-53.6391	-56.1672
2013-08-10 22:09:15	52.69	55.15		10.3049	-53.7105	-56.2181
2013-08-10 22:19:15	52.78	55.28		10.3118	-53.8022	-56.3507
2013-08-10 22:29:15	52.88	55.36		10.3188	-53.9042	-56.4322	2013-08-10 22:29:15
2013-08-10 22:39:15	52.97	55.52		10.3257	-53.9959	-56.5953
2013-08-10 22:49:15	53.07	55.55		10.3327	-54.0979	-56.6259
2013-08-10 22:59:15	53.16	55.65		10.3396	-54.1896	-56.7278
2013-08-10 23:09:15	53.23	55.72		10.3465	-54.261	-56.7992
2013-08-10 23:19:15	53.33	55.84		10.3535	-54.3629	-56.9215
2013-08-10 23:29:15	53.43	55.95		10.3604	-54.4648	-57.0336	2013-08-10 23:29:15
2013-08-10 23:39:15	53.55	56.07		10.3674	-54.5872	-57.156
2013-08-10 23:49:15	53.66	56.15		10.3743	-54.6993	-57.2375
2013-08-10 23:59:15	53.74	56.25		10.3813	-54.7808	-57.3394
2013-08-11 00:09:15	53.86	56.35		10.3882	-54.9032	-57.4414
2013-08-11 00:19:15	53.95	56.45		10.3952	-54.9949	-57.5433
2013-08-11 00:29:15	54.06	56.57		10.4021	-55.107	-57.6656	2013-08-11 00:29:15
2013-08-11 00:39:15	54.16	56.66		10.409	-55.209	-57.7574
2013-08-11 00:49:15	54.26	56.79		10.416	-55.3109	-57.8899
2013-08-11 00:59:15	54.38	56.89		10.4229	-55.4332	-57.9918
2013-08-11 01:09:15	54.5	57		10.4299	-55.5556	-58.104
2013-08-11 01:19:15	54.58	57.09		10.4368	-55.6371	-58.1957
2013-08-11 01:29:15	54.69	57.2		10.4438	-55.7492	-58.3078	2013-08-11 01:29:15
2013-08-11 01:39:15	54.8	57.32		10.4507	-55.8614	-58.4302
2013-08-11 01:49:15	54.89	57.38		10.4577	-55.9531	-58.4913
2013-08-11 02:09:15	55.08	57.61		10.4715	-56.1468	-58.7258
2013-08-11 02:19:15	55.22	57.76		10.4785	-56.2895	-58.8787
2013-08-11 02:29:15	55.36	57.88		10.4854	-56.4322	-59.001
2013-08-11 02:39:15	55.42	57.97		10.4924	-56.4934	-59.0928	2013-08-11 02:39:15
2013-08-11 02:49:15	55.54	58.06		10.4993	-56.6157	-59.1845
2013-08-11 02:59:15	55.66	58.17		10.5063	-56.738	-59.2966
2013-08-11 03:09:15	55.74	58.26		10.5132	-56.8196	-59.3884
2013-08-11 03:19:15	55.85	58.37		10.5202	-56.9317	-59.5005
2013-08-11 03:29:15	55.95	58.5		10.5271	-57.0336	-59.633
2013-08-11 03:39:15	56.05	58.58		10.534	-57.1356	-59.7146	2013-08-11 03:39:15
2013-08-11 03:49:15	56.17	58.68		10.541	-57.2579	-59.8165
2013-08-11 03:59:15	56.26	58.81		10.5479	-57.3496	-59.949
2013-08-11 04:09:15	56.38	58.94		10.5549	-57.472	-60.0815
2013-08-11 04:19:15	56.51	59.04		10.5618	-57.6045	-60.1835
2013-08-11 04:29:15	56.6	59.14		10.5688	-57.6962	-60.2854
2013-08-11 04:39:15	56.73	59.28		10.5757	-57.8287	-60.4281	2013-08-11 04:39:15
2013-08-11 04:49:15	56.85	59.38		10.5827	-57.9511	-60.5301
2013-08-11 04:59:15	56.97	59.51		10.5896	-58.0734	-60.6626
2013-08-11 05:09:15	57.1	59.64		10.5965	-58.2059	-60.7951
2013-08-11 05:19:15	57.24	59.75		10.6035	-58.3486	-60.9072
2013-08-11 05:29:15	57.24	59.8		10.6104	-58.3486	-60.9582
2013-08-11 05:39:15	57.41	59.98		10.6174	-58.5219	-61.1417	2013-08-11 05:39:15
2013-08-11 05:49:15	57.56	60.11		10.6243	-58.6748	-61.2742
2013-08-11 05:59:15	57.71	60.25		10.6313	-58.8277	-61.4169
2013-08-11 06:09:15	57.8	60.38		10.6382	-58.9195	-61.5494
2013-08-11 06:19:15	57.95	60.52		10.6452	-59.0724	-61.6922
2013-08-11 06:29:15	58.08	60.65		10.6521	-59.2049	-61.8247
2013-08-11 06:39:15	58.21	60.78		10.659	-59.3374	-61.9572	2013-08-11 06:39:15
2013-08-11 06:49:15	58.36	60.9		10.666	-59.4903	-62.0795
2013-08-11 06:59:15	58.45	60.97		10.6729	-59.5821	-62.1509
2013-08-11 07:09:15	58.56	61.13		10.6799	-59.6942	-62.314
2013-08-11 07:19:15	58.69	61.27		10.6868	-59.8267	-62.4567
2013-08-11 07:29:15	58.83	61.39		10.6938	-59.9694	-62.579
2013-08-11 07:39:15	58.94	61.55		10.7007	-60.0815	-62.7421	2013-08-11 07:39:15
2013-08-11 07:49:15	59.1	61.67		10.7077	-60.2446	-62.8644
2013-08-11 07:59:15	59.21	61.78		10.7146	-60.3568	-62.9766
2013-08-11 08:09:15	59.33	61.89		10.7215	-60.4791	-63.0887
2013-08-11 08:19:15	59.42	62.06		10.7285	-60.5708	-63.262
2013-08-11 08:29:15	59.6	62.21		10.7354	-60.7543	-63.4149
2013-08-11 08:39:15	59.72	62.3		10.7424	-60.8767	-63.5066	2013-08-11 08:39:15
2013-08-11 08:49:15	59.86	62.45		10.7493	-61.0194	-63.6595
2013-08-11 08:59:15	60	62.58		10.7563	-61.1621	-63.792
2013-08-11 09:09:15	60.08	62.67		10.7632	-61.2436	-63.8838
2013-08-11 09:19:15	60.25	62.83		10.7702	-61.4169	-64.0469
2013-08-11 09:29:15	60.37	62.96		10.7771	-61.5392	-64.1794
2013-08-11 09:39:15	60.5	63.09		10.784	-61.6718	-64.3119	2013-08-11 09:39:15
2013-08-11 09:49:15	60.6	63.2		10.791	-61.7737	-64.4241
2013-08-11 09:59:15	60.75	63.32		10.7979	-61.9266	-64.5464
2013-08-11 10:09:15	60.87	63.44		10.8049	-62.0489	-64.6687
2013-08-11 10:19:15	61.01	63.59		10.8118	-62.1916	-64.8216
2013-08-11 10:29:15	61.13	63.71		10.8188	-62.314	-64.9439
2013-08-11 10:39:15	61.26	63.85		10.8257	-62.4465	-65.0866	2013-08-11 10:39:15
2013-08-11 10:49:15	61.37	63.97		10.8327	-62.5586	-65.209
2013-08-11 10:59:15	61.52	64.11		10.8396	-62.7115	-65.3517
2013-08-11 11:09:15	61.63	64.22		10.8465	-62.8236	-65.4638
2013-08-11 11:19:15	61.74	64.32		10.8535	-62.9358	-65.5657
2013-08-11 11:29:15	61.84	64.41		10.8604	-63.0377	-65.6575
2013-08-11 11:39:15	61.94	64.58		10.8674	-63.1397	-65.8308	2013-08-11 11:39:15
2013-08-11 11:49:15	62.11	64.72		10.8743	-63.3129	-65.9735
2013-08-11 11:59:15	62.24	64.83		10.8813	-63.4455	-66.0856
2013-08-11 12:09:15	62.37	65		10.8882	-63.578	-66.2589
2013-08-11 12:19:15	62.53	65.11		10.8952	-63.7411	-66.371
2013-08-11 12:29:15	62.63	65.21		10.9021	-63.843	-66.473
2013-08-11 12:39:15	62.76	65.39		10.909	-63.9755	-66.6565	2013-08-11 12:39:15
2013-08-11 12:49:15	62.91	65.52		10.916	-64.1284	-66.789
2013-08-11 12:59:15	63.01	65.6		10.9229	-64.2304	-66.8705
2013-08-11 13:09:15	63.15	65.82		10.9299	-64.3731	-67.0948
2013-08-11 13:19:15	63.31	65.94		10.9368	-64.5362	-67.2171
2013-08-11 13:29:15	63.46	66.06		10.9438	-64.6891	-67.3394
2013-08-11 13:39:15	63.64	66.27		10.9507	-64.8726	-67.5535	2013-08-11 13:39:15
2013-08-11 13:49:15	63.66	66.32		10.9577	-64.893	-67.6045
2013-08-11 13:59:15	63.83	66.42		10.9646	-65.0663	-67.7064
2013-08-11 14:09:15	63.94	66.59		10.9715	-65.1784	-67.8797
2013-08-11 14:19:15	64.13	66.75		10.9785	-65.3721	-68.0428
2013-08-11 14:29:15	64.27	66.89		10.9854	-65.5148	-68.1855
2013-08-11 14:39:15	64.45	67.09		10.9924	-65.6983	-68.3894	2013-08-11 14:39:15
2013-08-11 14:49:15	64.61	67.2		10.9993	-65.8614	-68.5015
2013-08-11 14:59:15	64.75	67.35		11.0063	-66.0041	-68.6544
2013-08-11 15:09:15	64.86	67.5		11.0132	-66.1162	-68.8073
2013-08-11 15:19:15	64.99	67.63		11.0202	-66.2487	-68.9399
2013-08-11 15:29:15	65.14	67.84		11.0271	-66.4016	-69.1539
2013-08-11 15:39:15	65.35	67.95		11.034	-66.6157	-69.2661	2013-08-11 15:39:15
2013-08-11 15:49:15	65.44	68.09		11.041	-66.7074	-69.4088
2013-08-11 15:59:15	65.57	68.2		11.0479	-66.84	-69.5209
2013-08-11 16:09:15	65.72	68.37		11.0549	-66.9929	-69.6942
2013-08-11 16:19:15	65.86	68.52		11.0618	-67.1356	-69.8471
2013-08-11 16:29:15	65.98	68.67		11.0688	-67.2579	-70
2013-08-11 16:39:15	66.18	68.84		11.0757	-67.4618	-70.1733	2013-08-11 16:39:15
2013-08-11 16:49:15	66.36	69.01		11.0827	-67.6453	-70.3466
2013-08-11 16:59:15	66.47	69.13		11.0896	-67.7574	-70.4689
2013-08-11 17:09:15	66.61	69.26		11.0965	-67.9001	-70.6014
2013-08-11 17:19:15	66.73	69.49		11.1035	-68.0224	-70.8359
2013-08-11 17:29:15	66.94	69.59		11.1104	-68.2365	-70.9378
2013-08-11 17:39:15	67.11	69.78		11.1174	-68.4098	-71.1315	2013-08-11 17:39:15
2013-08-11 17:49:15	67.1	69.85		11.1243	-68.3996	-71.2029
2013-08-11 17:59:15	67.38	70.05		11.1313	-68.685	-71.4067
2013-08-11 18:19:15	67.63	70.3		11.1452	-68.9399	-71.6616
2013-08-11 18:29:15	67.76	70.46		11.1521	-69.0724	-71.8247
2013-08-11 18:39:15	67.88	70.63		11.159	-69.1947	-71.998
2013-08-11 18:49:15	68.04	70.77		11.166	-69.3578	-72.1407	2013-08-11 18:49:15
2013-08-11 18:59:15	68.2	70.88		11.1729	-69.5209	-72.2528
2013-08-11 19:09:15	68.37	71.1		11.1799	-69.6942	-72.4771
2013-08-11 19:19:15	68.5	71.21		11.1868	-69.8267	-72.5892
2013-08-11 19:29:15	68.68	71.32		11.1938	-70.0102	-72.7013
2013-08-11 19:39:15	68.86	71.56		11.2007	-70.1937	-72.946
2013-08-11 19:49:15	68.93	71.63		11.2077	-70.265	-73.0173	2013-08-11 19:49:15
2013-08-11 19:59:15	68.99	71.77		11.2146	-70.3262	-73.16
2013-08-11 20:09:15	69.2	71.9		11.2215	-70.5403	-73.2926
2013-08-11 20:19:15	69.36	72		11.2285	-70.7034	-73.3945
[truncated: 2,925 more rows]

## Sheet: Tensi
Zeit [d]	MP bot(2) [cm]	MP top(1) [cm]		air entry bot		AE time	AE [cm]	Type	Pos	Weight
0.00626989	-2.00815	-4.62793		2013-08-25 17:59:15	8800	25.1313	-8970.44	1	2	1
0.0409921	-2.23242	-4.79103
0.0896032	-2.46687	-5.03568		air entry top
0.13127	-2.70133	-5.27013		Time					Pos	Weight
0.172937	-2.88481	-5.43323		2013-08-22 16:39:15	8800	22.0757	-8970.44	1	1	1
0.214603	-3.27217	-5.83078
0.25627	-3.35372	-5.91233
0.297937	-3.49643	-6.05505
0.339603	-3.82263	-6.37105
0.38127	-4.22018	-6.78899
0.422937	-4.69929	-7.24771
0.464603	-4.94393	-7.51274
0.50627	-5.38226	-7.95107
0.547937	-5.50459	-8.0632
0.589603	-6.01427	-8.56269
0.63127	-6.19776	-8.75637
0.672937	-6.56473	-9.12334
0.714603	-6.27931	-8.84811
0.763214	-6.85015	-9.41896
0.804881	-6.97248	-9.53109
0.846548	-7.12538	-9.6738
0.888214	-7.53313	-10.0917
0.929881	-7.69623	-10.2548
0.971548	-7.83894	-10.3874
1.01321	-8.21611	-10.7645
1.05488	-8.44037	-10.9786
1.09655	-8.85831	-11.3965
1.13821	-8.8685	-11.4067
1.17988	-9.26606	-11.8043
1.22155	-9.49032	-12.0285
1.27016	-9.63303	-12.2018
1.31183	-9.88787	-12.4567
1.35349	-10.0102	-12.579
1.39516	-10.2039	-12.7727
1.43683	-10.3874	-12.9562
1.47849	-10.5505	-13.1193
1.5271	-10.7136	-13.2824
1.56877	-10.9276	-13.4964
1.61044	-11.0601	-13.6188
1.6521	-11.1723	-13.7309
1.69377	-11.2742	-13.8328
1.73544	-11.5087	-14.0673
1.7771	-11.4475	-14.0061
1.81877	-11.6412	-14.1998
1.86044	-11.8043	-14.3527
1.9021	-12.0183	-14.5668
1.94377	-12.2528	-14.8114
1.98544	-12.5076	-15.0561
2.0271	-12.8236	-15.3721
2.06877	-12.8033	-15.3517
2.11044	-13.0275	-15.5759
2.1521	-13.211	-15.7492
2.19377	-13.3333	-15.9021
2.23544	-13.7207	-16.2589
2.2771	-13.9959	-16.5443
2.31877	-14.159	-16.6972
2.36044	-14.3527	-16.8807
2.4021	-14.4648	-17.0031
2.44377	-14.6687	-17.2171
2.48544	-14.8522	-17.3904
2.5271	-15.0255	-17.5739
2.56877	-15.1886	-17.7166
2.61044	-15.3109	-17.8491
2.6521	-15.5046	-18.0326
2.69377	-15.5556	-18.0836
2.74238	-15.739	-18.2569
2.78405	-15.8206	-18.3486
2.82571	-15.3823	-17.9001
2.86738	-15.9021	-18.4098
2.90905	-16.106	-18.6239
2.95071	-16.2589	-18.7768
2.99238	-16.4016	-18.9093
3.03405	-16.4628	-18.9806
3.07571	-16.6463	-19.1743
3.11738	-16.8196	-19.3272
3.15905	-16.9317	-19.4393
3.20071	-17.0133	-19.5413
3.24238	-17.1865	-19.7044
3.28405	-17.2171	-19.7146
3.32571	-17.3089	-19.8165
3.36738	-17.4006	-19.9083
3.40905	-17.5229	-20.0306
3.45071	-17.686	-20.1835
3.49238	-17.8186	-20.3262
3.53405	-17.9001	-20.4179
3.57571	-18.0122	-20.5199
3.61738	-18.1346	-20.6422
3.65905	-18.2467	-20.7441
3.70071	-18.3486	-20.8563
3.74238	-18.4506	-20.9582
3.78405	-18.6137	-21.1111
3.82571	-18.4709	-20.9684
3.86738	-18.6646	-21.1621
3.90905	-18.8379	-21.3456
3.95071	-19.001	-21.4781
3.99238	-19.1233	-21.6208
4.03405	-19.2762	-21.7737
4.07571	-19.4801	-21.9776
4.11738	-19.6228	-22.1203
4.15905	-19.6636	-22.1611
4.20071	-19.8777	-22.3649
4.24238	-19.9083	-22.4261
4.28405	-20.1223	-22.6402
4.32571	-20.2446	-22.7523
4.36738	-20.3772	-22.8848
4.40905	-20.4077	-22.946
4.45071	-20.5097	-23.0173
4.49238	-20.6218	-23.1295
4.53405	-20.7441	-23.262
4.57571	-20.8767	-23.3843
4.61738	-21.0092	-23.5168
4.65905	-21.1723	-23.6799
4.70071	-21.315	-23.8124
4.74238	-20.6524	-23.16
4.78405	-21.4169	-23.9348
4.82571	-21.6208	-24.1284
4.86738	-21.7329	-24.2508
4.90905	-21.9164	-24.4139
4.95071	-21.9368	-24.4546
4.99933	-22.2426	-24.7604
5.04099	-22.4771	-24.9847
5.08266	-22.7013	-25.209
5.12433	-22.9256	-25.4332
5.16599	-23.0785	-25.5963
5.20766	-23.3028	-25.8206
5.24933	-22.9766	-25.4944
5.29099	-23.4659	-25.9837
5.33266	-23.6391	-26.1468
5.37433	-23.8226	-26.3303
5.41599	-23.9246	-26.4322
5.45766	-24.0469	-26.5545
5.49933	-24.1692	-26.6769
5.54099	-24.2915	-26.8094
5.58266	-24.4343	-26.9521
5.62433	-24.4444	-27.0438
5.66599	-24.6177	-27.1356
5.70766	-24.6891	-27.2069
5.74933	-24.8318	-27.3293
5.79099	-24.8828	-27.4006
5.83266	-25.0357	-27.5433
5.87433	-25.1376	-27.6656
5.91599	-24.842	-27.3598
5.95766	-25.4027	-27.9205
5.99933	-25.6065	-28.104
6.04099	-25.8614	-28.369
6.08266	-26.0652	-28.5729
6.12433	-26.3405	-28.8481
6.16599	-26.5138	-29.0214
6.20766	-26.7176	-29.2151
6.24933	-26.8909	-29.4088
6.29099	-27.0642	-29.5719
6.33266	-27.1967	-29.7146
6.37433	-27.2987	-29.8063
6.41599	-27.4006	-29.8981
6.45766	-27.5229	-30.0408
6.49933	-27.686	-30.1937
6.54099	-27.8287	-30.3364
6.58266	-27.9613	-30.4587
6.62433	-28.0836	-30.6014
6.66599	-28.2671	-30.7747
6.70766	-28.4098	-30.9276
6.74933	-28.5627	-31.0703
6.79099	-28.7054	-31.2334
6.83266	-28.9093	-31.4067
6.87433	-29.0622	-31.5698
6.91599	-29.1947	-31.7023
6.95766	-29.2661	-31.7635
6.99933	-29.4495	-31.9572
7.04099	-29.6228	-32.1203
7.08266	-29.7554	-32.2426
7.12433	-29.8981	-32.4057
7.16599	-30	-32.5076
7.20766	-30.1019	-32.6198
7.24933	-30.2548	-32.7523
7.29099	-30.4077	-32.9154
7.33266	-30.5607	-33.0785
7.38127	-30.7645	-33.262
7.42294	-30.8665	-33.3741
7.4646	-30.9684	-33.4659
7.50627	-31.1213	-33.629
7.54794	-31.2334	-33.7513
7.5896	-31.366	-33.8634
7.63127	-31.5087	-34.0265
7.67294	-31.682	-34.1794
7.7146	-31.8043	-34.3221
7.75627	-32.0285	-34.526
7.79794	-32.1203	-34.6483
7.8396	-32.314	-34.8114
7.88127	-32.4873	-35.0051
7.92294	-32.7115	-35.2192
7.9646	-32.9154	-35.4128
8.00627	-33.1498	-35.6575
8.04794	-33.3231	-35.8308
8.0896	-33.5678	-36.0652
8.14516	-33.8226	-36.3303
8.18683	-34.0877	-36.5749
8.22849	-34.1998	-36.7074
8.27016	-34.5158	-37.0133
8.31183	-34.7299	-37.2375
8.35349	-34.9745	-37.4924
8.39516	-35.1886	-37.6962
8.43683	-35.4842	-37.9918
8.47849	-35.6677	-38.1651
8.52016	-35.9531	-38.4404
8.56183	-36.1978	-38.6952
8.60349	-36.473	-38.9908
8.6521	-36.8094	-39.317
8.69377	-37.0438	-39.5515
8.73544	-37.2681	-39.7554
8.7771	-37.5229	-40.0204
8.81877	-37.9103	-40.3976
8.86044	-38.2263	-40.7339
8.9021	-38.5831	-41.0907
8.94377	-38.8991	-41.4169
8.98544	-39.2661	-41.7635
9.0271	-39.6228	-42.1203
9.06877	-40.0204	-42.5076
9.11044	-40.4791	-43.0071
9.1521	-40.9276	-43.4251
9.19377	-41.3048	-43.8124
9.23544	-41.7125	-44.2304
9.2771	-42.0795	-44.6075
9.31877	-42.4465	-44.9745
9.36044	-42.8644	-45.4128
9.4021	-43.1498	-45.6983
9.44377	-43.5984	-46.1264
9.48544	-44.0367	-46.5851
9.5271	-44.4343	-46.9827
9.56877	-44.8726	-47.421
9.61044	-45.2803	-47.8389
9.6521	-45.7594	-48.2977
9.69377	-46.1468	-48.7054
9.73544	-46.6769	-49.2049
9.7771	-47.0133	-49.5821
9.81877	-47.5433	-50.0917
9.86044	-48.0122	-50.5505
9.9021	-48.4811	-51.0398
9.94377	-48.9297	-51.4577
9.98544	-49.3986	-51.9266
10.0271	-49.949	-52.5076
10.0688	-50.5199	-53.0785
10.1104	-50.7951	-53.3537
10.1521	-51.5902	-54.1488
10.1938	-52.2222	-54.7503
10.2354	-52.7523	-55.3211
10.2771	-53.3741	-55.8716
10.3188	-53.9042	-56.4322
10.3604	-54.4648	-57.0336
10.4021	-55.107	-57.6656
10.4438	-55.7492	-58.3078
10.4924	-56.4934	-59.0928
10.534	-57.1356	-59.7146
10.5757	-57.8287	-60.4281
10.6174	-58.5219	-61.1417
10.659	-59.3374	-61.9572
10.7007	-60.0815	-62.7421
10.7424	-60.8767	-63.5066
10.784	-61.6718	-64.3119
10.8257	-62.4465	-65.0866
10.8674	-63.1397	-65.8308
10.909	-63.9755	-66.6565
10.9507	-64.8726	-67.5535
10.9924	-65.6983	-68.3894
11.034	-66.6157	-69.2661
11.0757	-67.4618	-70.1733
11.1174	-68.4098	-71.1315
11.166	-69.3578	-72.1407
11.2077	-70.265	-73.0173
11.2493	-71.0499	-73.792
11.291	-71.9368	-74.7299
11.3327	-72.946	-75.7085
11.3743	-73.843	-76.6157
11.416	-74.7197	-77.5331
11.4577	-75.6269	-78.4811
11.4993	-76.524	-79.3782
11.541	-77.2783	-80.3262
11.5827	-78.4608	-81.3761
11.6243	-79.419	-82.2528
11.6729	-80.4077	-83.2722
11.7146	-81.2538	-84.1794
11.7563	-81.9164	-84.8318
11.7979	-82.9664	-85.8614
11.8396	-83.9042	-86.8705
11.8813	-84.8624	-87.8287
11.9229	-85.7696	-88.8175
11.9646	-86.9113	-89.9898
12.0063	-87.9918	-91.0601
12.0479	-89.0112	-92.1713
12.0896	-90.0917	-93.1804
12.1313	-90.8869	-94.1386
12.1729	-92.2018	-95.423
12.2146	-93.2722	-96.5341
12.2563	-94.475	-97.8186
12.2979	-95.5759	-98.9501
12.3396	-96.7278	-100.214
12.3813	-97.9817	-101.509
12.4229	-99.2049	-102.773
12.4646	-100.459	-104.149
12.5063	-101.774	-105.413
12.5479	-102.997	-106.84
12.5896	-104.373	-108.328
12.6313	-105.688	-109.694
12.6729	-107.207	-111.335
12.7146	-108.767	-112.915
12.7563	-110.143	-114.475
12.7979	-111.774	-116.167
12.8396	-113.364	-117.757
12.8813	-114.801	-119.399
12.9299	-116.442	-121.233
12.9715	-118.053	-122.905
13.0132	-119.847	-124.669
13.0549	-121.417	-126.3
13.0965	-122.793	-128.043
13.1382	-124.72	-130.112
13.1799	-126.34	-131.733
13.2285	-128.277	-134.128
13.2702	-130	-135.973
13.3118	-131.753	-138.186
13.3604	-133.884	-140.561
13.409	-135.861	-142.834
13.4507	-137.615	-144.791
13.4924	-139.327	-146.667
13.534	-140.958	-148.583
13.5757	-142.508	-150.459
13.6174	-144.037	-152.253
13.659	-145.576	-154.118
13.7007	-146.86	-155.912
13.7493	-148.603	-157.503
13.7979	-150.163	-159.704
13.8465	-151.835	-161.876
13.8952	-153.384	-163.609
13.9438	-154.852	-165.535
13.9854	-156.137	-167.258
14.0271	-157.503	-168.97
14.0757	-158.889	-170.826
14.1174	-160.102	-172.426
14.159	-161.366	-173.792
14.2007	-162.64	-175.678
14.2424	-163.69	-177.187
14.284	-165.036	-178.981
14.3257	-166.3	-180.785
14.3674	-167.513	-182.538
14.409	-168.726	-184.363
14.4507	-169.918	-186.279
14.4924	-171.111	-188.084
14.534	-172.304	-190.02
14.5757	-173.456	-191.896
14.6174	-174.557	-193.823
14.659	-175.708	-195.759
14.7007	-176.82	-197.472
14.7424	-177.839	-199.725
14.784	-178.532	-200.765
14.8257	-179.123	-202.885
14.8743	-180.204	-205.015
14.916	-181.244	-206.85
14.9577	-182.263	-208.981
15.0063	-183.476	-211.182
15.0549	-184.648	-213.609
15.0965	-185.729	-215.668
15.1382	-186.697	-218.063
15.1799	-187.88	-220.041
15.2215	-188.481	-222.12
15.2632	-189.592	-224.567
15.3049	-190.398	-226.595
15.3465	-191.193	-228.981
15.3882	-192.141	-231.386
15.4299	-193.017	-233.843
15.4715	-193.884	-236.31
15.5132	-194.72	-238.777
15.5549	-195.596	-241.325
15.5965	-196.514	-243.986
15.6382	-197.482	-246.463
15.6868	-198.593	-249.99
15.7285	-199.276	-252.487
15.7702	-200.082	-253.609
15.8118	-201.152	-257.9
15.8535	-202.069	-261.733
15.9021	-203.476	-265.8
15.9438	-204.679	-268.654
15.9854	-206.045	-273.048
16.0271	-207.074	-276.983
16.0688	-208.216	-280.449
16.1104	-209.368	-284.241
16.1521	-210.54	-288.481
16.1938	-208.196	-283.884
16.2354	-214.23	-297.085
16.2771	-215.382	-302.243
16.3257	-216.667	-307.768
16.3674	-217.554	-312.559
16.409	-218.909	-317.146
16.4507	-219.99	-321.764
16.4924	-221.458	-327.176
16.534	-222.477	-332.477
16.5757	-223.812	-338.002
16.6174	-224.985	-343.058
16.659	-226.279	-348.777
16.7007	-227.472	-355.046
16.7424	-228.889	-360.979
16.784	-229.949	-362.406
16.8327	-231.509	-373.782
16.8743	-232.915	-380.387
16.916	-234.73	-388.053
16.9577	-236.381	-394.934
16.9993	-237.666	-402.375
17.0549	-239.511	-409.174
17.0965	-241.213	-417.931
17.1382	-243.129	-426.055
17.1799	-244.944	-435.474
17.2215	-246.728	-443.333
17.2632	-248.226	-451.437
17.3118	-249.643	-461.244
17.3535	-250.805	-467.564
17.3952	-252.915	-476.748
17.4368	-254.587	-483.792
17.4785	-256.34	-494.74
17.5202	-257.91	-504.444
17.5618	-259.674	-513.558
17.6104	-261.723	-524.536
17.6521	-263.721	-533.986
17.6938	-265.739	-544.495
17.7354	-267.788	-556.402
17.7771	-268.838	-564.638
17.8188	-273.364	-577.248
17.8604	-275.015	-587.095
17.9021	-278.318	-599.939
17.9438	-280.285	-612.059
17.9854	-282.487	-624.2
18.0271	-285.148	-638.369
18.0688	-288.063	-648.277
18.1104	-289.878	-660.917
18.159	-291.927	-675.107
18.2007	-294.852	-686.024
18.2424	-297.492	-699.766
18.284	-300.438	-712.1
18.3257	-302.212	-724.893
18.3674	-305.882	-738.991
18.409	-307.9	-752.864
18.4507	-311.142	-767.278
18.4924	-314.23	-782.997
18.534	-317.248	-797.207
18.5757	-321.896	-814.648
18.6243	-325.178	-831.498
18.666	-328.756	-847.655
18.7077	-332.283	-864.363
18.7493	-337.227	-880.877
18.791	-340.795	-900.387
18.8327	-345.066	-914.373
18.8882	-351.631	-938.787
18.916	-354.414
18.9577	-358.43
18.9993	-362.508
19.041	-361.662
19.0827	-373.109
19.1243	-377.798
19.166	-383.374
19.2077	-386.381
19.2563	-392.671
19.2979	-397.554
19.3465	-405.933
19.3882	-413.242
19.4299	-420.51
19.4715	-427.686
19.5132	-434.506
19.5549	-442.08
19.6035	-450.754
19.6452	-457.727
19.6868	-465.586
19.7285	-472.263
19.7702	-479.878
19.8118	-485.668
19.8535	-495.28
19.8952	-506.3
19.9368	-515.963
19.9785	-527.564
20.0202	-537.564
20.0618	-550.285
20.1035	-554.791
20.1452	-568.838
20.1868	-574.546
20.2354	-599.072
20.2771	-613.517
20.3188	-627.034
20.3604	-641.804
20.409	-658.96
20.4507	-674.139
20.4924	-690.398
20.534	-707.737
20.5757	-725.046
20.6174	-743.303
20.659	-761.019
20.7007	-776.85
20.7424	-790.632
20.784	-804.883
20.8257	-818.42
20.8674	-834.057
20.909	-894.954
20.9507	-913.812
20.9924	-921.182
21.034	-933.517
21.0757	-933.884
21.1174	-971.427
21.159	-1006.19
21.2007	-1040
21.2424	-1064.95
21.284	-1125.95
21.3257	-1154.22
21.3674	-1180.59
21.409	-1187.97
21.4507	-1231.98
21.4924	-1247.62
21.534	-1289.07
21.5757	-1293.93
21.6174	-1362.41
21.659	-1381.78
21.7007	-1402.06
21.7424	-1469.42
21.791	-1558.9
21.8327	-1576.19
21.8952	-1632.14

## Sheet: HYDRUS
Data für die Zielfunktion: 2 x Tensionen, 1 x Endwassergehalt					25.13	Verdunstungsrate
Time	Obs	Type	Pos	Weight		Zeitintervall		Evarate [cm/d]			Type	1-Tension	2-Wassergehalt
0.00626989	-2.00815	1	2	1		0.694756	0	0.224353			Pos	1-top	2-bot	(von oben nach unten)
0.0409921	-2.23242	1	2	1		1.22322	0	0.248603			66	Time-Variable boundary conditions+
0.0896032	-2.46687	1	2	1		1.73779	0	0.224234			25.132	Final Time	Time Information
0.13127	-2.70133	1	2	1		1.90855	0	0.20864			1035	Number of Data Points in Objective Function
0.172937	-2.88481	1	2	1		2.18305	0	0.293501		Interpolated Values	-5.19535	BC-top	[hPa]
0.214603	-3.27217	1	2	1		2.67647	0	0.250669			-3.94535	MP_top_ini	[hPa]	1
0.25627	-3.35372	1	2	1		3.01237	0	0.221173			-0.940528	MP_bot_ini	[hPa]	2
0.297937	-3.49643	1	2	1		3.24942	0	0.229709			0.309472	BC-bot	[hPa]
0.339603	-3.82263	1	2	1		3.80675	0	0.183786
0.38127	-4.22018	1	2	1		4.21771	0	0.213283
0.422937	-4.69929	1	2	1		4.74185	0	0.198514
0.464603	-4.94393	1	2	1		4.94186	0	0.213553		Real Values	-5.87793	BC-top	[cm]
0.50627	-5.38226	1	2	1		5.24584	0	0.255048			-4.62793	MP_top_ini	[cm]
0.547937	-5.50459	1	2	1		5.67541	0	0.196976			-2.06932	MP_bot_ini	[cm]
0.589603	-6.01427	1	2	1		5.91526	0	0.185678			-0.819317	BC-bot	[cm]
0.63127	-6.19776	1	2	1		6.14327	0	0.252145
0.672937	-6.56473	1	2	1		6.72202	0	0.199717
0.714603	-6.27931	1	2	1		6.93063	0	0.18243
0.763214	-6.85015	1	2	1		7.18302	0	0.178058
0.804881	-6.97248	1	2	1		7.73289	0	0.16235
0.846548	-7.12538	1	2	1		8.20807	0	0.176366
0.888214	-7.53313	1	2	1		8.76653	0	0.202624
0.929881	-7.69623	1	2	1		8.92749	0	0.223854
0.971548	-7.83894	1	2	1		9.15272	0	0.251655
1.01321	-8.21611	1	2	1		9.77225	0	0.24506
1.05488	-8.44037	1	2	1		10.1089	0	0.242356
1.09655	-8.85831	1	2	1		10.6044	0	0.241837
1.13821	-8.8685	1	2	1		11.2312	0	0.252868
1.17988	-9.26606	1	2	1		11.7259	0	0.244296
1.22155	-9.49032	1	2	1		11.9141	0	0.212988
1.27016	-9.63303	1	2	1		12.1297	0	0.215968
1.31183	-9.88787	1	2	1		12.719	0	0.224624
1.35349	-10.0102	1	2	1		12.9191	0	0.231704
1.39516	-10.2039	1	2	1		13.1961	0	0.2309
1.43683	-10.3874	1	2	1		13.7102	0	0.230361
1.47849	-10.5505	1	2	1		13.9024	0	0.215866
1.5271	-10.7136	1	2	1		14.1305	0	0.221913
1.56877	-10.9276	1	2	1		14.1459	0	0.223429
1.61044	-11.0601	1	2	1		14.8409	0	0.232722
1.6521	-11.1723	1	2	1		15.0699	0	0.223639
1.69377	-11.2742	1	2	1		15.1843	0	0.229949
1.73544	-11.5087	1	2	1		15.755	0	0.205758
1.7771	-11.4475	1	2	1		15.9078	0	0.194721
1.81877	-11.6412	1	2	1		16.1903	0	0.210676
1.86044	-11.8043	1	2	1		16.7725	0	0.184284
1.9021	-12.0183	1	2	1		17.0092	0	0.159888
1.94377	-12.2528	1	2	1		17.1908	0	0.163846
1.98544	-12.5076	1	2	1		17.7683	0	0.136017
2.0271	-12.8236	1	2	1		18.2095	0	0.127991
2.06877	-12.8033	1	2	1		18.7241	0	0.118014
2.11044	-13.0275	1	2	1		19.0216	0	0.104781
2.1521	-13.211	1	2	1		19.3045	0	0.105185
2.19377	-13.3333	1	2	1		19.7005	0	0.104794
2.23544	-13.7207	1	2	1		20.1761	0	0.10131
2.2771	-13.9959	1	2	1		20.7124	0	0.0973876
2.31877	-14.159	1	2	1		21.2391	0	0.085694
2.36044	-14.3527	1	2	1		21.7378	0	0.0706292
2.4021	-14.4648	1	2	1		21.9858	0	0.0701966
2.44377	-14.6687	1	2	1		22.1117	0	0.0723986
2.48544	-14.8522	1	2	1		22.7511	0	0.0626791
2.5271	-15.0255	1	2	1		22.9229	0	0.0601013
2.56877	-15.1886	1	2	1		23.1317	0	0.0571901
2.61044	-15.3109	1	2	1		23.8372	0	0.0556696
2.6521	-15.5046	1	2	1		24.1725	0	0.0567521
2.69377	-15.5556	1	2	1		24.8451	0	0.0517635
2.74238	-15.739	1	2	1		25.132	0	0.0518568
2.78405	-15.8206	1	2	1
2.82571	-15.3823	1	2	1
2.86738	-15.9021	1	2	1
2.90905	-16.106	1	2	1
2.95071	-16.2589	1	2	1
2.99238	-16.4016	1	2	1
3.03405	-16.4628	1	2	1
3.07571	-16.6463	1	2	1
3.11738	-16.8196	1	2	1
3.15905	-16.9317	1	2	1
3.20071	-17.0133	1	2	1
3.24238	-17.1865	1	2	1
3.28405	-17.2171	1	2	1
3.32571	-17.3089	1	2	1
3.36738	-17.4006	1	2	1
3.40905	-17.5229	1	2	1
3.45071	-17.686	1	2	1
3.49238	-17.8186	1	2	1
3.53405	-17.9001	1	2	1
3.57571	-18.0122	1	2	1
3.61738	-18.1346	1	2	1
3.65905	-18.2467	1	2	1
3.70071	-18.3486	1	2	1
3.74238	-18.4506	1	2	1
3.78405	-18.6137	1	2	1
3.82571	-18.4709	1	2	1
3.86738	-18.6646	1	2	1
3.90905	-18.8379	1	2	1
3.95071	-19.001	1	2	1
3.99238	-19.1233	1	2	1
4.03405	-19.2762	1	2	1
4.07571	-19.4801	1	2	1
4.11738	-19.6228	1	2	1
4.15905	-19.6636	1	2	1
4.20071	-19.8777	1	2	1
4.24238	-19.9083	1	2	1
4.28405	-20.1223	1	2	1
4.32571	-20.2446	1	2	1
4.36738	-20.3772	1	2	1
4.40905	-20.4077	1	2	1
4.45071	-20.5097	1	2	1
4.49238	-20.6218	1	2	1
4.53405	-20.7441	1	2	1
4.57571	-20.8767	1	2	1
4.61738	-21.0092	1	2	1
4.65905	-21.1723	1	2	1
4.70071	-21.315	1	2	1
4.74238	-20.6524	1	2	1
4.78405	-21.4169	1	2	1
4.82571	-21.6208	1	2	1
4.86738	-21.7329	1	2	1
4.90905	-21.9164	1	2	1
4.95071	-21.9368	1	2	1
4.99933	-22.2426	1	2	1
5.04099	-22.4771	1	2	1
5.08266	-22.7013	1	2	1
5.12433	-22.9256	1	2	1
5.16599	-23.0785	1	2	1
5.20766	-23.3028	1	2	1
5.24933	-22.9766	1	2	1
5.29099	-23.4659	1	2	1
5.33266	-23.6391	1	2	1
5.37433	-23.8226	1	2	1
5.41599	-23.9246	1	2	1
5.45766	-24.0469	1	2	1
5.49933	-24.1692	1	2	1
5.54099	-24.2915	1	2	1
5.58266	-24.4343	1	2	1
5.62433	-24.4444	1	2	1
5.66599	-24.6177	1	2	1
5.70766	-24.6891	1	2	1
5.74933	-24.8318	1	2	1
5.79099	-24.8828	1	2	1
5.83266	-25.0357	1	2	1
5.87433	-25.1376	1	2	1
5.91599	-24.842	1	2	1
5.95766	-25.4027	1	2	1
5.99933	-25.6065	1	2	1
6.04099	-25.8614	1	2	1
6.08266	-26.0652	1	2	1
6.12433	-26.3405	1	2	1
6.16599	-26.5138	1	2	1
6.20766	-26.7176	1	2	1
6.24933	-26.8909	1	2	1
6.29099	-27.0642	1	2	1
6.33266	-27.1967	1	2	1
6.37433	-27.2987	1	2	1
6.41599	-27.4006	1	2	1
6.45766	-27.5229	1	2	1
6.49933	-27.686	1	2	1
6.54099	-27.8287	1	2	1
6.58266	-27.9613	1	2	1
6.62433	-28.0836	1	2	1
6.66599	-28.2671	1	2	1
6.70766	-28.4098	1	2	1
6.74933	-28.5627	1	2	1
6.79099	-28.7054	1	2	1
6.83266	-28.9093	1	2	1
6.87433	-29.0622	1	2	1
6.91599	-29.1947	1	2	1
6.95766	-29.2661	1	2	1
6.99933	-29.4495	1	2	1
7.04099	-29.6228	1	2	1
7.08266	-29.7554	1	2	1
7.12433	-29.8981	1	2	1
7.16599	-30	1	2	1
7.20766	-30.1019	1	2	1
7.24933	-30.2548	1	2	1
7.29099	-30.4077	1	2	1
7.33266	-30.5607	1	2	1
7.38127	-30.7645	1	2	1
7.42294	-30.8665	1	2	1
7.4646	-30.9684	1	2	1
7.50627	-31.1213	1	2	1
7.54794	-31.2334	1	2	1
7.5896	-31.366	1	2	1
7.63127	-31.5087	1	2	1
7.67294	-31.682	1	2	1
7.7146	-31.8043	1	2	1
7.75627	-32.0285	1	2	1
7.79794	-32.1203	1	2	1
7.8396	-32.314	1	2	1
7.88127	-32.4873	1	2	1
7.92294	-32.7115	1	2	1
7.9646	-32.9154	1	2	1
8.00627	-33.1498	1	2	1
8.04794	-33.3231	1	2	1
8.0896	-33.5678	1	2	1
8.14516	-33.8226	1	2	1
8.18683	-34.0877	1	2	1
8.22849	-34.1998	1	2	1
8.27016	-34.5158	1	2	1
8.31183	-34.7299	1	2	1
8.35349	-34.9745	1	2	1
8.39516	-35.1886	1	2	1
8.43683	-35.4842	1	2	1
8.47849	-35.6677	1	2	1
8.52016	-35.9531	1	2	1
8.56183	-36.1978	1	2	1
8.60349	-36.473	1	2	1
8.6521	-36.8094	1	2	1
8.69377	-37.0438	1	2	1
8.73544	-37.2681	1	2	1
8.7771	-37.5229	1	2	1
8.81877	-37.9103	1	2	1
8.86044	-38.2263	1	2	1
8.9021	-38.5831	1	2	1
8.94377	-38.8991	1	2	1
8.98544	-39.2661	1	2	1
9.0271	-39.6228	1	2	1
9.06877	-40.0204	1	2	1
9.11044	-40.4791	1	2	1
9.1521	-40.9276	1	2	1
9.19377	-41.3048	1	2	1
9.23544	-41.7125	1	2	1
9.2771	-42.0795	1	2	1
9.31877	-42.4465	1	2	1
9.36044	-42.8644	1	2	1
9.4021	-43.1498	1	2	1
9.44377	-43.5984	1	2	1
9.48544	-44.0367	1	2	1
9.5271	-44.4343	1	2	1
9.56877	-44.8726	1	2	1
9.61044	-45.2803	1	2	1
9.6521	-45.7594	1	2	1
9.69377	-46.1468	1	2	1
9.73544	-46.6769	1	2	1
9.7771	-47.0133	1	2	1
9.81877	-47.5433	1	2	1
9.86044	-48.0122	1	2	1
9.9021	-48.4811	1	2	1
9.94377	-48.9297	1	2	1
9.98544	-49.3986	1	2	1
10.0271	-49.949	1	2	1
10.0688	-50.5199	1	2	1
10.1104	-50.7951	1	2	1
10.1521	-51.5902	1	2	1
10.1938	-52.2222	1	2	1
10.2354	-52.7523	1	2	1
10.2771	-53.3741	1	2	1
10.3188	-53.9042	1	2	1
10.3604	-54.4648	1	2	1
10.4021	-55.107	1	2	1
10.4438	-55.7492	1	2	1
10.4924	-56.4934	1	2	1
10.534	-57.1356	1	2	1
10.5757	-57.8287	1	2	1
10.6174	-58.5219	1	2	1
10.659	-59.3374	1	2	1
10.7007	-60.0815	1	2	1
10.7424	-60.8767	1	2	1
10.784	-61.6718	1	2	1
10.8257	-62.4465	1	2	1
10.8674	-63.1397	1	2	1
10.909	-63.9755	1	2	1
10.9507	-64.8726	1	2	1
10.9924	-65.6983	1	2	1
11.034	-66.6157	1	2	1
11.0757	-67.4618	1	2	1
11.1174	-68.4098	1	2	1
11.166	-69.3578	1	2	1
11.2077	-70.265	1	2	1
11.2493	-71.0499	1	2	1
11.291	-71.9368	1	2	1
11.3327	-72.946	1	2	1
11.3743	-73.843	1	2	1
11.416	-74.7197	1	2	1
11.4577	-75.6269	1	2	1
11.4993	-76.524	1	2	1
11.541	-77.2783	1	2	1
11.5827	-78.4608	1	2	1
11.6243	-79.419	1	2	1
11.6729	-80.4077	1	2	1
11.7146	-81.2538	1	2	1
11.7563	-81.9164	1	2	1
11.7979	-82.9664	1	2	1
11.8396	-83.9042	1	2	1
11.8813	-84.8624	1	2	1
11.9229	-85.7696	1	2	1
11.9646	-86.9113	1	2	1
12.0063	-87.9918	1	2	1
12.0479	-89.0112	1	2	1
12.0896	-90.0917	1	2	1
12.1313	-90.8869	1	2	1
12.1729	-92.2018	1	2	1
12.2146	-93.2722	1	2	1
12.2563	-94.475	1	2	1
12.2979	-95.5759	1	2	1
12.3396	-96.7278	1	2	1
12.3813	-97.9817	1	2	1
12.4229	-99.2049	1	2	1
12.4646	-100.459	1	2	1
12.5063	-101.774	1	2	1
12.5479	-102.997	1	2	1
12.5896	-104.373	1	2	1
12.6313	-105.688	1	2	1
12.6729	-107.207	1	2	1
12.7146	-108.767	1	2	1
12.7563	-110.143	1	2	1
12.7979	-111.774	1	2	1
12.8396	-113.364	1	2	1
12.8813	-114.801	1	2	1
12.9299	-116.442	1	2	1
12.9715	-118.053	1	2	1
13.0132	-119.847	1	2	1
13.0549	-121.417	1	2	1
13.0965	-122.793	1	2	1
13.1382	-124.72	1	2	1
13.1799	-126.34	1	2	1
13.2285	-128.277	1	2	1
13.2702	-130	1	2	1
13.3118	-131.753	1	2	1
13.3604	-133.884	1	2	1
13.409	-135.861	1	2	1
13.4507	-137.615	1	2	1
13.4924	-139.327	1	2	1
13.534	-140.958	1	2	1
13.5757	-142.508	1	2	1
13.6174	-144.037	1	2	1
13.659	-145.576	1	2	1
13.7007	-146.86	1	2	1
13.7493	-148.603	1	2	1
13.7979	-150.163	1	2	1
13.8465	-151.835	1	2	1
13.8952	-153.384	1	2	1
13.9438	-154.852	1	2	1
13.9854	-156.137	1	2	1
14.0271	-157.503	1	2	1
14.0757	-158.889	1	2	1
14.1174	-160.102	1	2	1
14.159	-161.366	1	2	1
14.2007	-162.64	1	2	1
14.2424	-163.69	1	2	1
14.284	-165.036	1	2	1
14.3257	-166.3	1	2	1
14.3674	-167.513	1	2	1
14.409	-168.726	1	2	1
14.4507	-169.918	1	2	1
14.4924	-171.111	1	2	1
14.534	-172.304	1	2	1
14.5757	-173.456	1	2	1
14.6174	-174.557	1	2	1
14.659	-175.708	1	2	1
14.7007	-176.82	1	2	1
14.7424	-177.839	1	2	1
14.784	-178.532	1	2	1
14.8257	-179.123	1	2	1
14.8743	-180.204	1	2	1
14.916	-181.244	1	2	1
14.9577	-182.263	1	2	1
15.0063	-183.476	1	2	1
15.0549	-184.648	1	2	1
15.0965	-185.729	1	2	1
15.1382	-186.697	1	2	1
15.1799	-187.88	1	2	1
15.2215	-188.481	1	2	1
15.2632	-189.592	1	2	1
15.3049	-190.398	1	2	1
15.3465	-191.193	1	2	1
15.3882	-192.141	1	2	1
15.4299	-193.017	1	2	1
15.4715	-193.884	1	2	1
15.5132	-194.72	1	2	1
15.5549	-195.596	1	2	1
15.5965	-196.514	1	2	1
15.6382	-197.482	1	2	1
15.6868	-198.593	1	2	1
15.7285	-199.276	1	2	1
15.7702	-200.082	1	2	1
15.8118	-201.152	1	2	1
15.8535	-202.069	1	2	1
15.9021	-203.476	1	2	1
15.9438	-204.679	1	2	1
15.9854	-206.045	1	2	1
16.0271	-207.074	1	2	1
16.0688	-208.216	1	2	1
16.1104	-209.368	1	2	1
16.1521	-210.54	1	2	1
16.1938	-208.196	1	2	1
16.2354	-214.23	1	2	1
16.2771	-215.382	1	2	1
16.3257	-216.667	1	2	1
16.3674	-217.554	1	2	1
16.409	-218.909	1	2	1
16.4507	-219.99	1	2	1
16.4924	-221.458	1	2	1
16.534	-222.477	1	2	1
16.5757	-223.812	1	2	1
16.6174	-224.985	1	2	1
16.659	-226.279	1	2	1
16.7007	-227.472	1	2	1
16.7424	-228.889	1	2	1
16.784	-229.949	1	2	1
16.8327	-231.509	1	2	1
16.8743	-232.915	1	2	1
16.916	-234.73	1	2	1
16.9577	-236.381	1	2	1
16.9993	-237.666	1	2	1
17.0549	-239.511	1	2	1
17.0965	-241.213	1	2	1
17.1382	-243.129	1	2	1
17.1799	-244.944	1	2	1
17.2215	-246.728	1	2	1
17.2632	-248.226	1	2	1
17.3118	-249.643	1	2	1
17.3535	-250.805	1	2	1
17.3952	-252.915	1	2	1
17.4368	-254.587	1	2	1
17.4785	-256.34	1	2	1
17.5202	-257.91	1	2	1
17.5618	-259.674	1	2	1
17.6104	-261.723	1	2	1
17.6521	-263.721	1	2	1
17.6938	-265.739	1	2	1
17.7354	-267.788	1	2	1
17.7771	-268.838	1	2	1
17.8188	-273.364	1	2	1
17.8604	-275.015	1	2	1
17.9021	-278.318	1	2	1
17.9438	-280.285	1	2	1
17.9854	-282.487	1	2	1
18.0271	-285.148	1	2	1
18.0688	-288.063	1	2	1
18.1104	-289.878	1	2	1
18.159	-291.927	1	2	1
18.2007	-294.852	1	2	1
18.2424	-297.492	1	2	1
18.284	-300.438	1	2	1
18.3257	-302.212	1	2	1
18.3674	-305.882	1	2	1
18.409	-307.9	1	2	1
18.4507	-311.142	1	2	1
18.4924	-314.23	1	2	1
18.534	-317.248	1	2	1
18.5757	-321.896	1	2	1
18.6243	-325.178	1	2	1
18.666	-328.756	1	2	1
18.7077	-332.283	1	2	1
18.7493	-337.227	1	2	1
18.791	-340.795	1	2	1
18.8327	-345.066	1	2	1
18.8882	-351.631	1	2	1
18.916	-354.414	1	2	1
18.9577	-358.43	1	2	1
18.9993	-362.508	1	2	1
19.041	-361.662	1	2	1
19.0827	-373.109	1	2	1
19.1243	-377.798	1	2	1
19.166	-383.374	1	2	1
19.2077	-386.381	1	2	1
19.2563	-392.671	1	2	1
19.2979	-397.554	1	2	1
19.3465	-405.933	1	2	1
19.3882	-413.242	1	2	1
19.4299	-420.51	1	2	1
19.4715	-427.686	1	2	1
19.5132	-434.506	1	2	1
19.5549	-442.08	1	2	1
19.6035	-450.754	1	2	1
19.6452	-457.727	1	2	1
19.6868	-465.586	1	2	1
19.7285	-472.263	1	2	1
19.7702	-479.878	1	2	1
19.8118	-485.668	1	2	1
19.8535	-495.28	1	2	1
19.8952	-506.3	1	2	1
19.9368	-515.963	1	2	1
19.9785	-527.564	1	2	1
20.0202	-537.564	1	2	1
20.0618	-550.285	1	2	1
20.1035	-554.791	1	2	1
20.1452	-568.838	1	2	1
20.1868	-574.546	1	2	1
20.2354	-599.072	1	2	1
20.2771	-613.517	1	2	1
20.3188	-627.034	1	2	1
20.3604	-641.804	1	2	1
20.409	-658.96	1	2	1
20.4507	-674.139	1	2	1
20.4924	-690.398	1	2	1
20.534	-707.737	1	2	1
20.5757	-725.046	1	2	1
20.6174	-743.303	1	2	1
20.659	-761.019	1	2	1
20.7007	-776.85	1	2	1
20.7424	-790.632	1	2	1
20.784	-804.883	1	2	1
20.8257	-818.42	1	2	1
20.8674	-834.057	1	2	1
20.909	-894.954	1	2	1
20.9507	-913.812	1	2	1
20.9924	-921.182	1	2	1
21.034	-933.517	1	2	1
21.0757	-933.884	1	2	1
21.1174	-971.427	1	2	1
21.159	-1006.19	1	2	1
21.2007	-1040	1	2	1
21.2424	-1064.95	1	2	1
21.284	-1125.95	1	2	1
21.3257	-1154.22	1	2	1
21.3674	-1180.59	1	2	1
21.409	-1187.97	1	2	1
21.4507	-1231.98	1	2	1
21.4924	-1247.62	1	2	1
21.534	-1289.07	1	2	1
21.5757	-1293.93	1	2	1
21.6174	-1362.41	1	2	1
21.659	-1381.78	1	2	1
21.7007	-1402.06	1	2	1
21.7424	-1469.42	1	2	1
21.791	-1558.9	1	2	1
21.8327	-1576.19	1	2	1
21.8952	-1632.14	1	2	1
25.13	-8970.44	1	2	1
0.00626989	-4.62793	1	1	1
0.0409921	-4.79103	1	1	1
0.0896032	-5.03568	1	1	1
0.13127	-5.27013	1	1	1
0.172937	-5.43323	1	1	1
0.214603	-5.83078	1	1	1
0.25627	-5.91233	1	1	1
0.297937	-6.05505	1	1	1
0.339603	-6.37105	1	1	1
0.38127	-6.78899	1	1	1
0.422937	-7.24771	1	1	1
0.464603	-7.51274	1	1	1
0.50627	-7.95107	1	1	1
0.547937	-8.0632	1	1	1
0.589603	-8.56269	1	1	1
0.63127	-8.75637	1	1	1
0.672937	-9.12334	1	1	1
0.714603	-8.84811	1	1	1
0.763214	-9.41896	1	1	1
0.804881	-9.53109	1	1	1
0.846548	-9.6738	1	1	1
0.888214	-10.0917	1	1	1
0.929881	-10.2548	1	1	1
0.971548	-10.3874	1	1	1
1.01321	-10.7645	1	1	1
1.05488	-10.9786	1	1	1
1.09655	-11.3965	1	1	1
1.13821	-11.4067	1	1	1
1.17988	-11.8043	1	1	1
1.22155	-12.0285	1	1	1
1.27016	-12.2018	1	1	1
1.31183	-12.4567	1	1	1
1.35349	-12.579	1	1	1
1.39516	-12.7727	1	1	1
1.43683	-12.9562	1	1	1
1.47849	-13.1193	1	1	1
1.5271	-13.2824	1	1	1
1.56877	-13.4964	1	1	1
1.61044	-13.6188	1	1	1
1.6521	-13.7309	1	1	1
1.69377	-13.8328	1	1	1
1.73544	-14.0673	1	1	1
1.7771	-14.0061	1	1	1
1.81877	-14.1998	1	1	1
1.86044	-14.3527	1	1	1
1.9021	-14.5668	1	1	1
1.94377	-14.8114	1	1	1
1.98544	-15.0561	1	1	1
2.0271	-15.3721	1	1	1
2.06877	-15.3517	1	1	1
2.11044	-15.5759	1	1	1
2.1521	-15.7492	1	1	1
2.19377	-15.9021	1	1	1
2.23544	-16.2589	1	1	1
2.2771	-16.5443	1	1	1
2.31877	-16.6972	1	1	1
2.36044	-16.8807	1	1	1
2.4021	-17.0031	1	1	1
2.44377	-17.2171	1	1	1
2.48544	-17.3904	1	1	1
2.5271	-17.5739	1	1	1
2.56877	-17.7166	1	1	1
2.61044	-17.8491	1	1	1
2.6521	-18.0326	1	1	1
2.69377	-18.0836	1	1	1
2.74238	-18.2569	1	1	1
2.78405	-18.3486	1	1	1
2.82571	-17.9001	1	1	1
2.86738	-18.4098	1	1	1
2.90905	-18.6239	1	1	1
2.95071	-18.7768	1	1	1
2.99238	-18.9093	1	1	1
3.03405	-18.9806	1	1	1
3.07571	-19.1743	1	1	1
3.11738	-19.3272	1	1	1
3.15905	-19.4393	1	1	1
3.20071	-19.5413	1	1	1
3.24238	-19.7044	1	1	1
3.28405	-19.7146	1	1	1
3.32571	-19.8165	1	1	1
3.36738	-19.9083	1	1	1
3.40905	-20.0306	1	1	1
3.45071	-20.1835	1	1	1
3.49238	-20.3262	1	1	1
3.53405	-20.4179	1	1	1
3.57571	-20.5199	1	1	1
3.61738	-20.6422	1	1	1
3.65905	-20.7441	1	1	1
3.70071	-20.8563	1	1	1
3.74238	-20.9582	1	1	1
3.78405	-21.1111	1	1	1
3.82571	-20.9684	1	1	1
3.86738	-21.1621	1	1	1
3.90905	-21.3456	1	1	1
3.95071	-21.4781	1	1	1
3.99238	-21.6208	1	1	1
4.03405	-21.7737	1	1	1
4.07571	-21.9776	1	1	1
4.11738	-22.1203	1	1	1
4.15905	-22.1611	1	1	1
4.20071	-22.3649	1	1	1
4.24238	-22.4261	1	1	1
4.28405	-22.6402	1	1	1
4.32571	-22.7523	1	1	1
4.36738	-22.8848	1	1	1
4.40905	-22.946	1	1	1
4.45071	-23.0173	1	1	1
4.49238	-23.1295	1	1	1
4.53405	-23.262	1	1	1
4.57571	-23.3843	1	1	1
4.61738	-23.5168	1	1	1
4.65905	-23.6799	1	1	1
4.70071	-23.8124	1	1	1
4.74238	-23.16	1	1	1
4.78405	-23.9348	1	1	1
4.82571	-24.1284	1	1	1
4.86738	-24.2508	1	1	1
4.90905	-24.4139	1	1	1
4.95071	-24.4546	1	1	1
4.99933	-24.7604	1	1	1
5.04099	-24.9847	1	1	1
5.08266	-25.209	1	1	1
5.12433	-25.4332	1	1	1
5.16599	-25.5963	1	1	1
5.20766	-25.8206	1	1	1
5.24933	-25.4944	1	1	1
5.29099	-25.9837	1	1	1
5.33266	-26.1468	1	1	1
5.37433	-26.3303	1	1	1
5.41599	-26.4322	1	1	1
5.45766	-26.5545	1	1	1
5.49933	-26.6769	1	1	1
5.54099	-26.8094	1	1	1
5.58266	-26.9521	1	1	1
5.62433	-27.0438	1	1	1
5.66599	-27.1356	1	1	1
5.70766	-27.2069	1	1	1
5.74933	-27.3293	1	1	1
5.79099	-27.4006	1	1	1
5.83266	-27.5433	1	1	1
5.87433	-27.6656	1	1	1
5.91599	-27.3598	1	1	1
5.95766	-27.9205	1	1	1
5.99933	-28.104	1	1	1
6.04099	-28.369	1	1	1
6.08266	-28.5729	1	1	1
6.12433	-28.8481	1	1	1
6.16599	-29.0214	1	1	1
6.20766	-29.2151	1	1	1
6.24933	-29.4088	1	1	1
6.29099	-29.5719	1	1	1
6.33266	-29.7146	1	1	1
6.37433	-29.8063	1	1	1
6.41599	-29.8981	1	1	1
6.45766	-30.0408	1	1	1
6.49933	-30.1937	1	1	1
6.54099	-30.3364	1	1	1
6.58266	-30.4587	1	1	1
6.62433	-30.6014	1	1	1
6.66599	-30.7747	1	1	1
6.70766	-30.9276	1	1	1
6.74933	-31.0703	1	1	1
6.79099	-31.2334	1	1	1
6.83266	-31.4067	1	1	1
6.87433	-31.5698	1	1	1
6.91599	-31.7023	1	1	1
6.95766	-31.7635	1	1	1
6.99933	-31.9572	1	1	1
7.04099	-32.1203	1	1	1
7.08266	-32.2426	1	1	1
7.12433	-32.4057	1	1	1
7.16599	-32.5076	1	1	1
7.20766	-32.6198	1	1	1
7.24933	-32.7523	1	1	1
7.29099	-32.9154	1	1	1
7.33266	-33.0785	1	1	1
7.38127	-33.262	1	1	1
7.42294	-33.3741	1	1	1
7.4646	-33.4659	1	1	1
7.50627	-33.629	1	1	1
7.54794	-33.7513	1	1	1
7.5896	-33.8634	1	1	1
7.63127	-34.0265	1	1	1
7.67294	-34.1794	1	1	1
7.7146	-34.3221	1	1	1
7.75627	-34.526	1	1	1
7.79794	-34.6483	1	1	1
7.8396	-34.8114	1	1	1
7.88127	-35.0051	1	1	1
7.92294	-35.2192	1	1	1
7.9646	-35.4128	1	1	1
8.00627	-35.6575	1	1	1
8.04794	-35.8308	1	1	1
8.0896	-36.0652	1	1	1
8.14516	-36.3303	1	1	1
8.18683	-36.5749	1	1	1
8.22849	-36.7074	1	1	1
8.27016	-37.0133	1	1	1
8.31183	-37.2375	1	1	1
8.35349	-37.4924	1	1	1
8.39516	-37.6962	1	1	1
8.43683	-37.9918	1	1	1
8.47849	-38.1651	1	1	1
8.52016	-38.4404	1	1	1
8.56183	-38.6952	1	1	1
8.60349	-38.9908	1	1	1
8.6521	-39.317	1	1	1
8.69377	-39.5515	1	1	1
8.73544	-39.7554	1	1	1
8.7771	-40.0204	1	1	1
8.81877	-40.3976	1	1	1
8.86044	-40.7339	1	1	1
8.9021	-41.0907	1	1	1
8.94377	-41.4169	1	1	1
8.98544	-41.7635	1	1	1
9.0271	-42.1203	1	1	1
9.06877	-42.5076	1	1	1
9.11044	-43.0071	1	1	1
9.1521	-43.4251	1	1	1
9.19377	-43.8124	1	1	1
9.23544	-44.2304	1	1	1
9.2771	-44.6075	1	1	1
9.31877	-44.9745	1	1	1
9.36044	-45.4128	1	1	1
9.4021	-45.6983	1	1	1
9.44377	-46.1264	1	1	1
9.48544	-46.5851	1	1	1
9.5271	-46.9827	1	1	1
9.56877	-47.421	1	1	1
9.61044	-47.8389	1	1	1
9.6521	-48.2977	1	1	1
9.69377	-48.7054	1	1	1
9.73544	-49.2049	1	1	1
9.7771	-49.5821	1	1	1
9.81877	-50.0917	1	1	1
9.86044	-50.5505	1	1	1
9.9021	-51.0398	1	1	1
9.94377	-51.4577	1	1	1
9.98544	-51.9266	1	1	1
10.0271	-52.5076	1	1	1
10.0688	-53.0785	1	1	1
10.1104	-53.3537	1	1	1
10.1521	-54.1488	1	1	1
10.1938	-54.7503	1	1	1
10.2354	-55.3211	1	1	1
10.2771	-55.8716	1	1	1
10.3188	-56.4322	1	1	1
10.3604	-57.0336	1	1	1
10.4021	-57.6656	1	1	1
10.4438	-58.3078	1	1	1
10.4924	-59.0928	1	1	1
10.534	-59.7146	1	1	1
10.5757	-60.4281	1	1	1
10.6174	-61.1417	1	1	1
10.659	-61.9572	1	1	1
10.7007	-62.7421	1	1	1
10.7424	-63.5066	1	1	1
10.784	-64.3119	1	1	1
10.8257	-65.0866	1	1	1
10.8674	-65.8308	1	1	1
10.909	-66.6565	1	1	1
10.9507	-67.5535	1	1	1
10.9924	-68.3894	1	1	1
11.034	-69.2661	1	1	1
11.0757	-70.1733	1	1	1
11.1174	-71.1315	1	1	1
11.166	-72.1407	1	1	1
11.2077	-73.0173	1	1	1
11.2493	-73.792	1	1	1
11.291	-74.7299	1	1	1
11.3327	-75.7085	1	1	1
11.3743	-76.6157	1	1	1
11.416	-77.5331	1	1	1
11.4577	-78.4811	1	1	1
11.4993	-79.3782	1	1	1
11.541	-80.3262	1	1	1
11.5827	-81.3761	1	1	1
11.6243	-82.2528	1	1	1
11.6729	-83.2722	1	1	1
11.7146	-84.1794	1	1	1
11.7563	-84.8318	1	1	1
11.7979	-85.8614	1	1	1
11.8396	-86.8705	1	1	1
11.8813	-87.8287	1	1	1
11.9229	-88.8175	1	1	1
11.9646	-89.9898	1	1	1
12.0063	-91.0601	1	1	1
12.0479	-92.1713	1	1	1
12.0896	-93.1804	1	1	1
12.1313	-94.1386	1	1	1
12.1729	-95.423	1	1	1
12.2146	-96.5341	1	1	1
12.2563	-97.8186	1	1	1
12.2979	-98.9501	1	1	1
12.3396	-100.214	1	1	1
12.3813	-101.509	1	1	1
12.4229	-102.773	1	1	1
12.4646	-104.149	1	1	1
12.5063	-105.413	1	1	1
12.5479	-106.84	1	1	1
12.5896	-108.328	1	1	1
12.6313	-109.694	1	1	1
12.6729	-111.335	1	1	1
12.7146	-112.915	1	1	1
12.7563	-114.475	1	1	1
12.7979	-116.167	1	1	1
12.8396	-117.757	1	1	1
12.8813	-119.399	1	1	1
12.9299	-121.233	1	1	1
12.9715	-122.905	1	1	1
13.0132	-124.669	1	1	1
13.0549	-126.3	1	1	1
13.0965	-128.043	1	1	1
13.1382	-130.112	1	1	1
13.1799	-131.733	1	1	1
13.2285	-134.128	1	1	1
13.2702	-135.973	1	1	1
13.3118	-138.186	1	1	1
13.3604	-140.561	1	1	1
13.409	-142.834	1	1	1
13.4507	-144.791	1	1	1
13.4924	-146.667	1	1	1
13.534	-148.583	1	1	1
13.5757	-150.459	1	1	1
13.6174	-152.253	1	1	1
13.659	-154.118	1	1	1
13.7007	-155.912	1	1	1
13.7493	-157.503	1	1	1
13.7979	-159.704	1	1	1
13.8465	-161.876	1	1	1
13.8952	-163.609	1	1	1
13.9438	-165.535	1	1	1
13.9854	-167.258	1	1	1
14.0271	-168.97	1	1	1
14.0757	-170.826	1	1	1
14.1174	-172.426	1	1	1
14.159	-173.792	1	1	1
14.2007	-175.678	1	1	1
14.2424	-177.187	1	1	1
14.284	-178.981	1	1	1
14.3257	-180.785	1	1	1
14.3674	-182.538	1	1	1
14.409	-184.363	1	1	1
14.4507	-186.279	1	1	1
14.4924	-188.084	1	1	1
14.534	-190.02	1	1	1
14.5757	-191.896	1	1	1
14.6174	-193.823	1	1	1
14.659	-195.759	1	1	1
14.7007	-197.472	1	1	1
14.7424	-199.725	1	1	1
14.784	-200.765	1	1	1
14.8257	-202.885	1	1	1
14.8743	-205.015	1	1	1
14.916	-206.85	1	1	1
14.9577	-208.981	1	1	1
15.0063	-211.182	1	1	1
15.0549	-213.609	1	1	1
15.0965	-215.668	1	1	1
15.1382	-218.063	1	1	1
15.1799	-220.041	1	1	1
15.2215	-222.12	1	1	1
15.2632	-224.567	1	1	1
15.3049	-226.595	1	1	1
15.3465	-228.981	1	1	1
15.3882	-231.386	1	1	1
15.4299	-233.843	1	1	1
15.4715	-236.31	1	1	1
15.5132	-238.777	1	1	1
15.5549	-241.325	1	1	1
15.5965	-243.986	1	1	1
15.6382	-246.463	1	1	1
15.6868	-249.99	1	1	1
15.7285	-252.487	1	1	1
15.7702	-253.609	1	1	1
15.8118	-257.9	1	1	1
15.8535	-261.733	1	1	1
15.9021	-265.8	1	1	1
15.9438	-268.654	1	1	1
15.9854	-273.048	1	1	1
16.0271	-276.983	1	1	1
16.0688	-280.449	1	1	1
16.1104	-284.241	1	1	1
16.1521	-288.481	1	1	1
16.1938	-283.884	1	1	1
16.2354	-297.085	1	1	1
16.2771	-302.243	1	1	1
16.3257	-307.768	1	1	1
16.3674	-312.559	1	1	1
16.409	-317.146	1	1	1
16.4507	-321.764	1	1	1
16.4924	-327.176	1	1	1
16.534	-332.477	1	1	1
16.5757	-338.002	1	1	1
16.6174	-343.058	1	1	1
16.659	-348.777	1	1	1
16.7007	-355.046	1	1	1
16.7424	-360.979	1	1	1
16.784	-362.406	1	1	1
16.8327	-373.782	1	1	1
16.8743	-380.387	1	1	1
16.916	-388.053	1	1	1
16.9577	-394.934	1	1	1
16.9993	-402.375	1	1	1
17.0549	-409.174	1	1	1
17.0965	-417.931	1	1	1
17.1382	-426.055	1	1	1
17.1799	-435.474	1	1	1
17.2215	-443.333	1	1	1
17.2632	-451.437	1	1	1
17.3118	-461.244	1	1	1
17.3535	-467.564	1	1	1
17.3952	-476.748	1	1	1
17.4368	-483.792	1	1	1
17.4785	-494.74	1	1	1
17.5202	-504.444	1	1	1
17.5618	-513.558	1	1	1
17.6104	-524.536	1	1	1
17.6521	-533.986	1	1	1
17.6938	-544.495	1	1	1
17.7354	-556.402	1	1	1
17.7771	-564.638	1	1	1
17.8188	-577.248	1	1	1
17.8604	-587.095	1	1	1
17.9021	-599.939	1	1	1
17.9438	-612.059	1	1	1
17.9854	-624.2	1	1	1
18.0271	-638.369	1	1	1
18.0688	-648.277	1	1	1
18.1104	-660.917	1	1	1
18.159	-675.107	1	1	1
18.2007	-686.024	1	1	1
18.2424	-699.766	1	1	1
18.284	-712.1	1	1	1
18.3257	-724.893	1	1	1
18.3674	-738.991	1	1	1
18.409	-752.864	1	1	1
18.4507	-767.278	1	1	1
18.4924	-782.997	1	1	1
18.534	-797.207	1	1	1
18.5757	-814.648	1	1	1
18.6243	-831.498	1	1	1
18.666	-847.655	1	1	1
18.7077	-864.363	1	1	1
18.7493	-880.877	1	1	1
18.791	-900.387	1	1	1
18.8327	-914.373	1	1	1
18.8882	-938.787	1	1	1
22.0757	-8970.44	1	1	1
0.694756	0.878178	2	0	100000
1.22322	0.851903	2	0	100000
1.73779	0.828826	2	0	100000
1.90855	0.8217	2	0	100000
2.18305	0.805587	2	0	100000
2.67647	0.78085	2	0	100000
3.01237	0.765992	2	0	100000
3.24942	0.755101	2	0	100000
3.80675	0.734615	2	0	100000
4.21771	0.717085	2	0	100000
4.74185	0.696275	2	0	100000
4.94186	0.687733	2	0	100000
5.24584	0.672227	2	0	100000
5.67541	0.655304	2	0	100000
5.91526	0.646397	2	0	100000
6.14327	0.634899	2	0	100000
6.72202	0.611781	2	0	100000
6.93063	0.60417	2	0	100000
7.18302	0.595182	2	0	100000
7.73289	0.577328	2	0	100000
8.20807	0.560567	2	0	100000
8.76653	0.537935	2	0	100000
8.92749	0.530729	2	0	100000
9.15272	0.519393	2	0	100000
9.77225	0.489028	2	0	100000
10.1089	0.472713	2	0	100000
10.6044	0.448745	2	0	100000
11.2312	0.417045	2	0	100000
11.7259	0.392874	2	0	100000
11.9141	0.384858	2	0	100000
12.1297	0.375547	2	0	100000
12.719	0.349069	2	0	100000
12.9191	0.339798	2	0	100000
13.1961	0.327004	2	0	100000
13.7102	0.30332	2	0	100000
13.9024	0.29502	2	0	100000
14.1305	0.284899	2	0	100000
14.1459	0.284211	2	0	100000
14.8409	0.251862	2	0	100000
15.0699	0.241619	2	0	100000
15.1843	0.236356	2	0	100000
15.755	0.212874	2	0	100000
15.9078	0.206923	2	0	100000
16.1903	0.19502	2	0	100000
16.7725	0.173563	2	0	100000
17.0092	0.165992	2	0	100000
17.1908	0.16004	2	0	100000
17.7683	0.144332	2	0	100000
18.2095	0.133036	2	0	100000
18.7241	0.120891	2	0	100000
19.0216	0.114656	2	0	100000
19.3045	0.108704	2	0	100000
19.7005	0.100405	2	0	100000
20.1761	0.0907692	2	0	100000
20.7124	0.0803239	2	0	100000
21.2391	0.0712955	2	0	100000
21.7378	0.064251	2	0	100000
21.9858	0.0607692	2	0	100000
22.1117	0.0589474	2	0	100000
22.7511	0.0509312	2	0	100000
22.9229	0.0488664	2	0	100000
23.1317	0.0464777	2	0	100000
23.8372	0.0386235	2	0	100000
24.1725	0.0348178	2	0	100000
24.8451	0.0278543	2	0	100000
25.131	0.0248863	2	0	100000

## Sheet: tens_interpolation
		Datum / Zeit	Tension unten [hPa]	Tension oben [hPa]
m_bot	b_bot	2013-07-31 15:49:15	0.65	3.59
82.8	-3.43509e+06	2013-07-31 16:09:15	1.8	4.76
m_top	b_top	2013-07-31 15:53:59	0.921717	3.86644
84.24	-3.49483e+06	y = m*x+b
		AE unten [t]	AE oben [t]
		41227.2
			Brutto-Gewicht [g]	Netto-Gewicht [g]
-1.40314	58626.9	2013-08-23 17:58:52	382.99	12.72
		2013-08-24 10:54:53	382	11.73
-1.40314	58256.7	2013-08-24 06:49:00	382.24	11.9696
			AE unten
m_bot	b_bot	2013-08-25 11:07:10	390.66	18.86
-2.56173	106732	2013-08-25 22:10:28	389.48	17.68
m_top	b_top	2013-08-25 17:59:15	389.927	18.1269
-2.56173	106360	y = m*x+b
