# Supplementary material for: A pore-size classification for peat bogs derived from unsaturated hydraulic properties
Source: Copernicus journal article supplement (doi:10.5194/hess-21-6185-2017), 2017-12-07
Supplement: Supplementary file 15 [file A323_5_HYDRUS.xlsx]

## Sheet: Gewicht
Datum / Zeit	Brutto-Gewicht [g]	Netto-Gewicht [g]	Gewichtsänderung [g]	Zeit [d]	Theta [-]	Verdunstungsrate [cm/d]		Volumen	255
2012-12-08 18:00:04	624.93	258.63	0					Höhe	5
2012-12-09 11:53:28	609.84	243.54	-15.09	0.745413	0.907804	0.396938		A	51
2012-12-09 19:47:17	603.57	237.27	-21.36	1.07445	0.883216	0.373637		Theta0	0.96698
2012-12-10 09:24:16	593.47	227.17	-31.46	1.6418	0.843608	0.349063		Trockengewicht	12.05
2012-12-10 17:41:00	588.14	221.84	-36.79	1.98676	0.822706	0.302961		Ks (as in Ksat)
2012-12-10 23:11:05	584.64	218.34	-40.29	2.21597	0.80898	0.299401		delta System [g]	366.3
2012-12-11 11:54:58	576.39	210.09	-48.54	2.74645	0.776627	0.304944
2012-12-11 17:29:01	572.8	206.5	-52.13	2.97844	0.762549	0.30343
2012-12-12 09:22:51	560.96	194.66	-63.97	3.64082	0.716118	0.350488
2012-12-12 17:30:37	555.17	188.87	-69.76	3.97954	0.693412	0.335168
2012-12-13 09:54:47	544.61	178.31	-80.32	4.66299	0.652	0.30296
2012-12-13 21:58:53	536.67	170.37	-88.26	5.16584	0.620863	0.30961
2012-12-14 09:21:23	529.46	163.16	-95.47	5.6398	0.592588	0.29828
2012-12-14 20:00:47	523.09	156.79	-101.84	6.08383	0.567608	0.281293
2012-12-15 11:47:54	514.04	147.74	-110.89	6.74155	0.532118	0.269796
2012-12-16 14:42:03	499.74	133.44	-125.19	7.86248	0.476039	0.250143
2012-12-17 09:02:00	490.17	123.87	-134.76	8.62633	0.43851	0.245658
2012-12-18 08:30:29	478.37	112.07	-146.56	9.60445	0.392235	0.23655
2012-12-18 16:27:02	474.37	108.07	-150.56	9.93538	0.376549	0.236998
2012-12-19 08:08:16	466.62	100.32	-158.31	10.589	0.346157	0.232485
2012-12-19 16:41:40	462.3	96	-162.63	10.9456	0.329216	0.237581
2012-12-20 08:24:15	455.07	88.77	-169.86	11.6001	0.300863	0.216576
2012-12-20 17:22:57	451.09	84.79	-173.84	11.9742	0.285255	0.208607
2012-12-21 08:14:45	445.48	79.18	-179.45	12.5935	0.263255	0.177619
2012-12-21 18:30:26	441.88	75.58	-183.05	13.0211	0.249137	0.165099
2012-12-22 09:50:32	437.06	70.76	-187.87	13.66	0.230235	0.147911
2012-12-22 19:19:22	434.42	68.12	-190.51	14.0551	0.219882	0.131042
2012-12-23 08:47:08	431.09	64.79	-193.84	14.616	0.206824	0.116399
2012-12-25 11:45:14	421	54.7	-203.93	16.7397	0.167255	0.0931605
2012-12-26 14:39:45	416.24	49.94	-208.69	17.8609	0.148588	0.0832449
2012-12-27 12:01:14	412.7	46.4	-212.23	18.7508	0.134706	0.0779978
2012-12-27 18:13:44	411.71	45.41	-213.22	19.0095	0.130824	0.0750422
2012-12-28 09:45:07	409.2	42.9	-215.73	19.6563	0.12098	0.0760922
2012-12-29 09:16:09	405.59	39.29	-219.34	20.6362	0.106824	0.072237
2012-12-29 09:40:09	405.55	39.25	-219.38	20.6528	0.106667	0.0470685
2012-12-31 12:21:29	398.74	32.44	-226.19	22.7649	0.0799608	0.063223

## Sheet: Tensionen
Datum / Zeit	Tension unten [hPa]	Tension oben [hPa]	Zeit [d]	MP bot(2) [cm]	MP top(1) [cm]		WÄGUNG START
2012-12-08 17:51:08	3.36	5.86	-0.00621184	-3.42508	-5.9735		41251.8	-6.09582
2012-12-08 17:52:08	3.36	5.84	-0.0055174	-3.42508	-5.95311		2012-12-08 18:00:04
2012-12-08 17:53:08	3.35	5.85	-0.00482295	-3.41488	-5.9633
2012-12-08 17:54:08	3.36	5.84	-0.00412851	-3.42508	-5.95311
2012-12-08 17:55:08	3.37	5.87	-0.00343406	-3.43527	-5.98369
2012-12-08 17:56:08	3.38	5.87	-0.00273962	-3.44546	-5.98369
2012-12-08 17:57:08	3.39	5.88	-0.00204518	-3.45566	-5.99388
2012-12-08 17:58:08	3.39	5.88	-0.00135073	-3.45566	-5.99388
2012-12-08 17:59:08	3.39	5.88	-0.000656286	-3.45566	-5.99388
2012-12-08 18:00:08	3.37	5.91	3.81583e-05	-3.43527	-6.02446
2012-12-08 18:01:08	3.34	5.87	0.000732603	-3.40469	-5.98369
2012-12-08 18:02:08	3.33	5.85	0.00142705	-3.3945	-5.9633
2012-12-08 18:03:08	3.35	5.83	0.00212149	-3.41488	-5.94292
2012-12-08 18:04:08	3.36	5.85	0.00281594	-3.42508	-5.9633
2012-12-08 18:05:08	3.4	5.87	0.00351038	-3.46585	-5.98369
2012-12-08 18:06:08	3.41	5.88	0.00420482	-3.47604	-5.99388
2012-12-08 18:07:08	3.45	5.92	0.00489927	-3.51682	-6.03466
2012-12-08 18:08:08	3.46	5.94	0.00559371	-3.52701	-6.05505
2012-12-08 18:09:08	3.48	5.95	0.00628816	-3.5474	-6.06524
2012-12-08 18:10:08	3.49	5.96	0.0069826	-3.55759	-6.07543
2012-12-08 18:11:08	3.5	5.98	0.00767705	-3.56779	-6.09582	2012-12-08 18:11:08
2012-12-08 18:12:08	3.52	5.98	0.00837149	-3.58818	-6.09582
2012-12-08 18:13:08	3.54	6.01	0.00906594	-3.60856	-6.1264
2012-12-08 18:14:08	3.56	6.04	0.00976038	-3.62895	-6.15698
2012-12-08 18:15:08	3.59	6.06	0.0104548	-3.65953	-6.17737
2012-12-08 18:16:08	3.62	6.09	0.0111493	-3.69011	-6.20795
2012-12-08 18:17:08	3.64	6.12	0.0118437	-3.7105	-6.23853
2012-12-08 18:18:08	3.67	6.12	0.0125382	-3.74108	-6.23853
2012-12-08 18:19:08	3.69	6.15	0.0132326	-3.76147	-6.26911
2012-12-08 18:20:08	3.71	6.18	0.013927	-3.78186	-6.29969
2012-12-08 18:21:08	3.74	6.21	0.0146215	-3.81244	-6.33028
2012-12-08 18:22:08	3.76	6.22	0.0153159	-3.83282	-6.34047
2012-12-08 18:23:08	3.79	6.24	0.0160104	-3.8634	-6.36086
2012-12-08 18:24:08	3.81	6.27	0.0167048	-3.88379	-6.39144
2012-12-08 18:25:08	3.83	6.3	0.0173993	-3.90418	-6.42202
2012-12-08 18:26:08	3.86	6.32	0.0180937	-3.93476	-6.44241
2012-12-08 18:27:08	3.9	6.33	0.0187882	-3.97554	-6.4526
2012-12-08 18:28:08	3.91	6.37	0.0194826	-3.98573	-6.49337
2012-12-08 18:29:08	3.93	6.4	0.020177	-4.00612	-6.52396
2012-12-08 18:30:08	3.96	6.41	0.0208715	-4.0367	-6.53415
2012-12-08 18:31:08	3.98	6.45	0.0215659	-4.05708	-6.57492
2012-12-08 18:32:08	4	6.47	0.0222604	-4.07747	-6.59531
2012-12-08 18:33:08	4.03	6.49	0.0229548	-4.10805	-6.6157
2012-12-08 18:34:08	4.05	6.52	0.0236493	-4.12844	-6.64628
2012-12-08 18:35:08	4.07	6.54	0.0243437	-4.14883	-6.66667
2012-12-08 18:36:08	4.1	6.56	0.0250382	-4.17941	-6.68705
2012-12-08 18:37:08	4.12	6.58	0.0257326	-4.1998	-6.70744
2012-12-08 18:38:08	4.16	6.6	0.026427	-4.24057	-6.72783
2012-12-08 18:39:08	4.17	6.63	0.0271215	-4.25076	-6.75841
2012-12-08 18:40:08	4.19	6.65	0.0278159	-4.27115	-6.7788
2012-12-08 18:41:08	4.21	6.67	0.0285104	-4.29154	-6.79918
2012-12-08 18:42:08	4.24	6.69	0.0292048	-4.32212	-6.81957
2012-12-08 18:43:08	4.27	6.7	0.0298993	-4.3527	-6.82977
2012-12-08 18:44:08	4.28	6.73	0.0305937	-4.3629	-6.86035
2012-12-08 18:45:08	4.29	6.74	0.0312882	-4.37309	-6.87054
2012-12-08 18:46:08	4.32	6.77	0.0319826	-4.40367	-6.90112
2012-12-08 18:47:08	4.35	6.78	0.032677	-4.43425	-6.91131
2012-12-08 18:48:08	4.36	6.81	0.0333715	-4.44444	-6.9419
2012-12-08 18:49:08	4.38	6.82	0.0340659	-4.46483	-6.95209
2012-12-08 18:50:08	4.4	6.85	0.0347604	-4.48522	-6.98267
2012-12-08 18:51:08	4.43	6.87	0.0354548	-4.5158	-7.00306
2012-12-08 19:01:08	4.63	7.08	0.0423993	-4.71967	-7.21713
2012-12-08 19:11:08	4.84	7.28	0.0493437	-4.93374	-7.421	2012-12-08 19:11:08
2012-12-08 19:21:08	5.04	7.46	0.0562882	-5.13761	-7.60449
2012-12-08 19:31:08	5.24	7.67	0.0632326	-5.34149	-7.81855
2012-12-08 19:41:08	5.45	7.88	0.070177	-5.55556	-8.03262
2012-12-08 19:51:08	5.62	8.07	0.0771215	-5.72885	-8.2263
2012-12-08 20:01:08	5.81	8.25	0.0840659	-5.92253	-8.40979
2012-12-08 20:11:08	5.72	8.15	0.0910104	-5.83078	-8.30785	2012-12-08 20:11:08
2012-12-08 20:21:08	5.92	8.36	0.0979548	-6.03466	-8.52192
2012-12-08 20:31:08	6.1	8.54	0.104899	-6.21814	-8.7054
2012-12-08 20:41:08	6.19	8.65	0.111844	-6.30989	-8.81753
2012-12-08 20:51:08	6.35	8.8	0.118788	-6.47299	-8.97044
2012-12-08 21:01:08	6.5	8.95	0.125733	-6.62589	-9.12334
2012-12-08 21:11:08	6.64	9.09	0.132677	-6.7686	-9.26606	2012-12-08 21:11:08
2012-12-08 21:21:08	6.78	9.24	0.139621	-6.91131	-9.41896
2012-12-08 21:31:08	6.9	9.36	0.146566	-7.03364	-9.54128
2012-12-08 21:41:08	7.05	9.5	0.15351	-7.18654	-9.684
2012-12-08 21:51:08	7.17	9.61	0.160455	-7.30887	-9.79613
2012-12-08 22:01:08	7.31	9.77	0.167399	-7.45158	-9.95923
2012-12-08 22:11:08	7.46	9.92	0.174344	-7.60449	-10.1121	2012-12-08 22:11:08
2012-12-08 22:21:08	7.6	10.06	0.181288	-7.7472	-10.2548
2012-12-08 22:31:08	7.75	10.21	0.188233	-7.9001	-10.4077
2012-12-08 22:41:08	7.89	10.35	0.195177	-8.04281	-10.5505
2012-12-08 22:51:08	7.96	10.44	0.202121	-8.11417	-10.6422
2012-12-08 23:01:08	8.12	10.59	0.209066	-8.27727	-10.7951
2012-12-08 23:11:08	8.18	10.66	0.21601	-8.33843	-10.8665	2012-12-08 23:11:08
2012-12-08 23:21:08	8.33	10.81	0.222955	-8.49134	-11.0194
2012-12-08 23:31:08	8.47	10.94	0.229899	-8.63405	-11.1519
2012-12-08 23:41:08	8.6	11.08	0.236844	-8.76656	-11.2946
2012-12-08 23:51:08	8.71	11.18	0.243788	-8.8787	-11.3965
2012-12-09 00:01:08	8.8	11.28	0.250733	-8.97044	-11.4985
2012-12-09 00:11:08	8.9	11.39	0.257677	-9.07238	-11.6106	2012-12-09 00:11:08
2012-12-09 00:21:08	9.05	11.52	0.264621	-9.22528	-11.7431
2012-12-09 00:31:08	9.16	11.64	0.271566	-9.33741	-11.8654
2012-12-09 00:41:08	9.27	11.75	0.27851	-9.44954	-11.9776
2012-12-09 00:51:08	9.39	11.87	0.285455	-9.57187	-12.0999
2012-12-09 01:01:08	9.49	11.96	0.292399	-9.6738	-12.1916
2012-12-09 01:11:08	9.6	12.07	0.299344	-9.78593	-12.3038	2012-12-09 01:11:08
2012-12-09 01:21:08	9.7	12.19	0.306288	-9.88787	-12.4261
2012-12-09 01:31:08	9.84	12.3	0.313233	-10.0306	-12.5382
2012-12-09 01:41:08	9.88	12.34	0.320177	-10.0714	-12.579
2012-12-09 01:51:08	10.01	12.48	0.327121	-10.2039	-12.7217
2012-12-09 02:01:08	10.1	12.57	0.334066	-10.2956	-12.8135
2012-12-09 02:11:08	9.83	12.32	0.34101	-10.0204	-12.5586	2012-12-09 02:11:08
2012-12-09 02:21:08	10.08	12.56	0.347955	-10.2752	-12.8033
2012-12-09 02:31:08	10.21	12.69	0.354899	-10.4077	-12.9358
2012-12-09 02:41:08	10.32	12.81	0.361844	-10.5199	-13.0581
2012-12-09 02:51:08	10.41	12.9	0.368788	-10.6116	-13.1498
2012-12-09 03:01:08	10.4	12.85	0.375733	-10.6014	-13.0989
2012-12-09 03:11:08	10.53	13.02	0.382677	-10.7339	-13.2722	2012-12-09 03:11:08
2012-12-09 03:21:08	10.63	13.11	0.389621	-10.8359	-13.3639
2012-12-09 03:31:08	9.39	11.87	0.396566	-9.57187	-12.0999
2012-12-09 03:41:08	9.81	12.29	0.40351	-10	-12.528
2012-12-09 03:51:08	10.1	12.6	0.410455	-10.2956	-12.844
2012-12-09 04:01:08	10.36	12.85	0.417399	-10.5607	-13.0989
2012-12-09 04:11:08	10.59	13.08	0.424344	-10.7951	-13.3333	2012-12-09 04:11:08
2012-12-09 04:21:08	10.75	13.23	0.431288	-10.9582	-13.4862
2012-12-09 04:31:08	10.9	13.36	0.438233	-11.1111	-13.6188
2012-12-09 04:41:08	10.91	13.38	0.445177	-11.1213	-13.6391
2012-12-09 04:51:08	11.01	13.51	0.452121	-11.2232	-13.7717
2012-12-09 05:01:08	11.04	13.54	0.459066	-11.2538	-13.8022
2012-12-09 05:11:08	11.11	13.57	0.46601	-11.3252	-13.8328	2012-12-09 05:11:08
2012-12-09 05:21:08	11.19	13.67	0.472955	-11.4067	-13.9348
2012-12-09 05:31:08	10.93	13.61	0.479899	-11.1417	-13.8736
2012-12-09 05:41:08	10.12	12.61	0.486844	-10.316	-12.8542
2012-12-09 05:51:08	10.45	12.92	0.493788	-10.6524	-13.1702
2012-12-09 06:01:08	10.71	13.2	0.500733	-10.9174	-13.4557
2012-12-09 06:11:08	10.97	13.46	0.507677	-11.1825	-13.7207	2012-12-09 06:11:08
2012-12-09 06:21:08	11.2	13.68	0.514621	-11.4169	-13.945
2012-12-09 06:31:08	11.23	13.73	0.521566	-11.4475	-13.9959
2012-12-09 06:41:08	11.29	13.78	0.52851	-11.5087	-14.0469
2012-12-09 06:51:08	11.35	13.83	0.535455	-11.5698	-14.0979
2012-12-09 07:01:08	11.39	13.88	0.542399	-11.6106	-14.1488
2012-12-09 07:11:08	11.39	13.88	0.549344	-11.6106	-14.1488	2012-12-09 07:11:08
2012-12-09 07:21:08	11.45	13.94	0.556288	-11.6718	-14.21
2012-12-09 07:31:08	11.4	13.88	0.563233	-11.6208	-14.1488
2012-12-09 07:41:08	11.52	14	0.570177	-11.7431	-14.2712
2012-12-09 07:51:08	11.63	14.11	0.577121	-11.8552	-14.3833
2012-12-09 08:01:08	11.63	14.12	0.584066	-11.8552	-14.3935
2012-12-09 08:11:08	11.64	14.12	0.59101	-11.8654	-14.3935	2012-12-09 08:11:08
2012-12-09 08:21:08	11.7	14.19	0.597955	-11.9266	-14.4648
2012-12-09 08:31:08	11.63	14.12	0.604899	-11.8552	-14.3935
2012-12-09 08:41:08	11.74	14.24	0.611844	-11.9674	-14.5158
2012-12-09 08:51:08	11.7	14.18	0.618788	-11.9266	-14.4546
2012-12-09 09:01:08	11.62	14.1	0.625733	-11.8451	-14.3731
2012-12-09 09:11:08	11.67	14.16	0.632677	-11.896	-14.4343	2012-12-09 09:11:08
2012-12-09 09:21:08	11.74	14.23	0.639621	-11.9674	-14.5056
2012-12-09 09:31:08	11.76	14.24	0.646566	-11.9878	-14.5158
2012-12-09 09:41:08	11.73	14.22	0.65351	-11.9572	-14.4954
2012-12-09 09:51:08	11.76	14.24	0.660455	-11.9878	-14.5158
2012-12-09 10:01:08	11.84	14.33	0.667399	-12.0693	-14.6075
2012-12-09 10:11:08	11.75	14.25	0.674344	-11.9776	-14.526	2012-12-09 10:11:08
2012-12-09 10:21:08	11.95	14.29	0.681288	-12.1814	-14.5668
2012-12-09 10:31:08	11.82	14.31	0.688233	-12.0489	-14.5872
2012-12-09 10:41:08	11.89	14.37	0.695177	-12.1203	-14.6483
2012-12-09 10:51:08	11.79	14.26	0.702121	-12.0183	-14.5362
2012-12-09 11:01:08	11.97	14.47	0.709066	-12.2018	-14.7503
2012-12-09 11:11:08	11.74	14.21	0.71601	-11.9674	-14.4852	2012-12-09 11:11:08
2012-12-09 11:21:08	11.73	14.22	0.722955	-11.9572	-14.4954
2012-12-09 11:31:08	11.71	14.19	0.729899	-11.9368	-14.4648
2012-12-09 11:41:08	11.72	14.21	0.736844	-11.947	-14.4852
2012-12-09 11:51:08	11.72	14.17	0.743788	-11.947	-14.4444
2012-12-09 12:01:08	11.3	13.78	0.750733	-11.5189	-14.0469
2012-12-09 12:11:08	11.52	14.03	0.757677	-11.7431	-14.3017	2012-12-09 12:11:08
2012-12-09 12:31:08	12.01	14.51	0.771566	-12.2426	-14.791
2012-12-09 12:41:08	11.98	14.47	0.77851	-12.212	-14.7503
2012-12-09 12:51:08	11.95	14.45	0.785455	-12.1814	-14.7299
2012-12-09 13:01:08	12.02	14.51	0.792399	-12.2528	-14.791
2012-12-09 13:11:08	12.02	14.5	0.799344	-12.2528	-14.7808
2012-12-09 13:21:08	12.05	14.54	0.806288	-12.2834	-14.8216	2012-12-09 13:21:08
2012-12-09 13:31:08	12.11	14.59	0.813233	-12.3445	-14.8726
2012-12-09 13:41:08	12.11	14.6	0.820177	-12.3445	-14.8828
2012-12-09 13:51:08	12.13	14.61	0.827121	-12.3649	-14.893
2012-12-09 14:01:08	12.19	14.67	0.834066	-12.4261	-14.9541
2012-12-09 14:11:08	12.18	14.66	0.84101	-12.4159	-14.9439
2012-12-09 14:21:08	12.31	14.77	0.847955	-12.5484	-15.0561	2012-12-09 14:21:08
2012-12-09 14:31:08	12.39	14.87	0.854899	-12.63	-15.158
2012-12-09 14:41:08	12.42	14.91	0.861844	-12.6606	-15.1988
2012-12-09 14:51:08	12.48	14.97	0.868788	-12.7217	-15.2599
2012-12-09 15:01:08	12.56	15.04	0.875733	-12.8033	-15.3313
2012-12-09 15:11:08	12.5	14.96	0.882677	-12.7421	-15.2497
2012-12-09 15:21:08	12.67	15.15	0.889621	-12.9154	-15.4434	2012-12-09 15:21:08
2012-12-09 15:31:08	12.73	15.21	0.896566	-12.9766	-15.5046
2012-12-09 15:41:08	12.56	15.04	0.90351	-12.8033	-15.3313
2012-12-09 15:51:08	12.64	15.12	0.910455	-12.8848	-15.4128
2012-12-09 16:01:08	11.12	13.66	0.917399	-11.3354	-13.9246
2012-12-09 16:11:08	11.41	13.88	0.924344	-11.631	-14.1488
2012-12-09 16:21:08	11.62	14.08	0.931288	-11.8451	-14.3527	2012-12-09 16:21:08
2012-12-09 16:31:08	11.84	14.32	0.938233	-12.0693	-14.5973
2012-12-09 16:41:08	12.07	14.54	0.945177	-12.3038	-14.8216
2012-12-09 16:51:08	12.22	14.7	0.952121	-12.4567	-14.9847
2012-12-09 17:01:08	12.39	14.87	0.959066	-12.63	-15.158
2012-12-09 17:11:08	10.73	13.16	0.96601	-10.9378	-13.4149
2012-12-09 17:21:08	10.78	13.25	0.972955	-10.9888	-13.5066	2012-12-09 17:21:08
2012-12-09 17:31:08	11.05	13.48	0.979899	-11.264	-13.7411
2012-12-09 17:41:08	11.26	13.73	0.986844	-11.4781	-13.9959
2012-12-09 17:51:08	11.51	13.97	0.993788	-11.7329	-14.2406
2012-12-09 18:01:08	11.71	14.18	1.00073	-11.9368	-14.4546
2012-12-09 18:11:08	11.92	14.38	1.00768	-12.1509	-14.6585
2012-12-09 18:21:08	12.1	14.57	1.01462	-12.3344	-14.8522	2012-12-09 18:21:08
2012-12-09 18:31:08	12.31	14.77	1.02157	-12.5484	-15.0561
2012-12-09 18:41:08	11.92	14.35	1.02851	-12.1509	-14.6279
2012-12-09 18:51:08	12.1	14.57	1.03545	-12.3344	-14.8522
2012-12-09 19:01:08	12.32	14.78	1.0424	-12.5586	-15.0663
2012-12-09 19:11:08	12.47	14.94	1.04934	-12.7115	-15.2294
2012-12-09 19:21:08	12.56	15.03	1.05629	-12.8033	-15.3211	2012-12-09 19:21:08
2012-12-09 19:31:08	12.18	14.65	1.06323	-12.4159	-14.9337
2012-12-09 19:41:08	12.39	14.86	1.07018	-12.63	-15.1478
2012-12-09 19:51:08	12.1	14.57	1.07712	-12.3344	-14.8522
2012-12-09 20:01:08	12.36	14.83	1.08407	-12.5994	-15.1172
2012-12-09 20:11:08	12.52	14.98	1.09101	-12.7625	-15.2701
2012-12-09 20:21:08	12.69	15.15	1.09795	-12.9358	-15.4434	2012-12-09 20:21:08
2012-12-09 20:31:08	12.76	15.21	1.1049	-13.0071	-15.5046
2012-12-09 20:41:08	12.85	15.31	1.11184	-13.0989	-15.6065
2012-12-09 20:51:08	12.95	15.42	1.11879	-13.2008	-15.7187
2012-12-09 21:01:08	13.05	15.51	1.12573	-13.3028	-15.8104
2012-12-09 21:11:08	13.11	15.57	1.13268	-13.3639	-15.8716
2012-12-09 21:21:08	13.19	15.65	1.13962	-13.4455	-15.9531	2012-12-09 21:21:08
2012-12-09 21:31:08	13.28	15.72	1.14657	-13.5372	-16.0245
2012-12-09 21:41:08	13.34	15.82	1.15351	-13.5984	-16.1264
2012-12-09 21:51:08	13.44	15.89	1.16045	-13.7003	-16.1978
2012-12-09 22:01:08	13.5	15.96	1.1674	-13.7615	-16.2691
2012-12-09 22:11:08	13.59	16.05	1.17434	-13.8532	-16.3609
2012-12-09 22:21:08	13.52	15.99	1.18129	-13.7819	-16.2997	2012-12-09 22:21:08
2012-12-09 22:31:08	13.59	16.06	1.18823	-13.8532	-16.371
2012-12-09 22:41:08	13.68	16.12	1.19518	-13.945	-16.4322
2012-12-09 22:51:08	13.76	16.22	1.20212	-14.0265	-16.5341
2012-12-09 23:01:08	13.83	16.3	1.20907	-14.0979	-16.6157
2012-12-09 23:11:08	13.93	16.38	1.21601	-14.1998	-16.6972
2012-12-09 23:21:08	13.97	16.43	1.22295	-14.2406	-16.7482	2012-12-09 23:21:08
2012-12-09 23:31:08	13.38	15.85	1.2299	-13.6391	-16.157
2012-12-09 23:41:08	13.68	16.15	1.23684	-13.945	-16.4628
2012-12-09 23:51:08	13.93	16.39	1.24379	-14.1998	-16.7074
2012-12-10 00:01:08	13.99	16.46	1.25073	-14.261	-16.7788
2012-12-10 00:11:08	14.11	16.58	1.25768	-14.3833	-16.9011
2012-12-10 00:21:08	14.18	16.65	1.26462	-14.4546	-16.9725	2012-12-10 00:21:08
2012-12-10 00:31:08	14.1	16.56	1.27157	-14.3731	-16.8807
2012-12-10 00:41:08	14.29	16.73	1.27851	-14.5668	-17.054
2012-12-10 00:51:08	14.22	16.67	1.28545	-14.4954	-16.9929
2012-12-10 01:01:08	14.34	16.81	1.2924	-14.6177	-17.1356
2012-12-10 01:11:08	14.42	16.89	1.29934	-14.6993	-17.2171
2012-12-10 01:21:08	14.49	16.97	1.30629	-14.7706	-17.2987	2012-12-10 01:21:08
2012-12-10 01:31:08	14.53	17	1.31323	-14.8114	-17.3293
2012-12-10 01:41:08	14.59	17.05	1.32018	-14.8726	-17.3802
2012-12-10 01:51:08	14.64	17.11	1.32712	-14.9235	-17.4414
2012-12-10 02:01:08	14.64	17.1	1.33407	-14.9235	-17.4312
2012-12-10 02:11:08	14.7	17.17	1.34101	-14.9847	-17.5025
2012-12-10 02:21:08	14.68	17.15	1.34795	-14.9643	-17.4822	2012-12-10 02:21:08
2012-12-10 02:31:08	14.76	17.23	1.3549	-15.0459	-17.5637
2012-12-10 02:41:08	14.83	17.3	1.36184	-15.1172	-17.6351
2012-12-10 02:51:08	14.91	17.37	1.36879	-15.1988	-17.7064
2012-12-10 03:01:08	14.97	17.43	1.37573	-15.2599	-17.7676
2012-12-10 03:11:08	15.02	17.49	1.38268	-15.3109	-17.8287
2012-12-10 03:21:08	15.08	17.54	1.38962	-15.3721	-17.8797	2012-12-10 03:21:08
2012-12-10 03:31:08	15.08	17.59	1.39657	-15.3721	-17.9307
2012-12-10 03:41:08	15.15	17.62	1.40351	-15.4434	-17.9613
2012-12-10 03:51:08	15.2	17.68	1.41045	-15.4944	-18.0224
2012-12-10 04:01:08	14.35	16.82	1.4174	-14.6279	-17.1458
2012-12-10 04:11:08	14.57	17.04	1.42434	-14.8522	-17.37
2012-12-10 04:21:08	14.77	17.24	1.43129	-15.0561	-17.5739	2012-12-10 04:21:08
2012-12-10 04:31:08	14.98	17.45	1.43823	-15.2701	-17.788
2012-12-10 04:41:08	15.15	17.63	1.44518	-15.4434	-17.9715
2012-12-10 04:51:08	15.24	17.71	1.45212	-15.5352	-18.053
2012-12-10 05:01:08	15.29	17.77	1.45907	-15.5861	-18.1142
2012-12-10 05:11:08	15.26	17.82	1.46601	-15.5556	-18.1651
2012-12-10 05:21:08	15.38	17.84	1.47295	-15.6779	-18.1855	2012-12-10 05:21:08
2012-12-10 05:31:08	15.43	17.9	1.4799	-15.7288	-18.2467
2012-12-10 05:41:08	15.48	17.95	1.48684	-15.7798	-18.2977
2012-12-10 05:51:08	15.52	18	1.49379	-15.8206	-18.3486
2012-12-10 06:01:08	15.56	18.03	1.50073	-15.8614	-18.3792
2012-12-10 06:11:08	15.6	18.07	1.50768	-15.9021	-18.42
2012-12-10 06:21:08	15.67	18.14	1.51462	-15.9735	-18.4913	2012-12-10 06:21:08
2012-12-10 06:31:08	15.7	18.16	1.52157	-16.0041	-18.5117
2012-12-10 06:41:08	15.75	18.19	1.52851	-16.055	-18.5423
2012-12-10 06:51:08	15.79	18.26	1.53545	-16.0958	-18.6137
2012-12-10 07:01:08	15.85	18.31	1.5424	-16.157	-18.6646
2012-12-10 07:11:08	15.92	18.38	1.54934	-16.2283	-18.736
2012-12-10 07:21:08	15.96	18.43	1.55629	-16.2691	-18.787	2012-12-10 07:21:08
2012-12-10 07:31:08	16	18.47	1.56323	-16.3099	-18.8277
2012-12-10 07:41:08	16.07	18.54	1.57018	-16.3812	-18.8991
2012-12-10 07:51:08	16.09	18.55	1.57712	-16.4016	-18.9093
2012-12-10 08:01:08	16.14	18.61	1.58407	-16.4526	-18.9704
2012-12-10 08:11:08	16.14	18.61	1.59101	-16.4526	-18.9704
2012-12-10 08:21:08	16.13	18.6	1.59795	-16.4424	-18.9602	2012-12-10 08:21:08
2012-12-10 08:31:08	16.2	18.66	1.6049	-16.5138	-19.0214
2012-12-10 08:41:08	16.23	18.69	1.61184	-16.5443	-19.052
2012-12-10 08:51:08	16.24	18.71	1.61879	-16.5545	-19.0724
2012-12-10 09:01:08	16.3	18.76	1.62573	-16.6157	-19.1233
2012-12-10 09:11:08	16.32	18.77	1.63268	-16.6361	-19.1335
2012-12-10 09:21:08	16.36	18.82	1.63962	-16.6769	-19.1845	2012-12-10 09:21:08
2012-12-10 09:31:08	15.88	18.34	1.64657	-16.1876	-18.6952
2012-12-10 09:41:08	16.1	18.54	1.65351	-16.4118	-18.8991
2012-12-10 09:51:08	16.25	18.71	1.66045	-16.5647	-19.0724
2012-12-10 10:01:08	16.31	18.75	1.6674	-16.6259	-19.1131
2012-12-10 10:11:08	16.34	18.79	1.67434	-16.6565	-19.1539
2012-12-10 10:21:08	16.39	18.84	1.68129	-16.7074	-19.2049	2012-12-10 10:21:08
2012-12-10 10:31:08	16.2	18.66	1.68823	-16.5138	-19.0214
2012-12-10 10:41:08	16.27	18.73	1.69518	-16.5851	-19.0928
2012-12-10 10:51:08	16.4	18.85	1.70212	-16.7176	-19.2151
2012-12-10 11:01:08	16.47	18.93	1.70907	-16.789	-19.2966
2012-12-10 11:11:08	16.53	18.97	1.71601	-16.8502	-19.3374
2012-12-10 11:21:08	16.57	19	1.72295	-16.8909	-19.368	2012-12-10 11:21:08
2012-12-10 11:31:08	16.59	19.04	1.7299	-16.9113	-19.4088
2012-12-10 11:41:08	16.65	19.11	1.73684	-16.9725	-19.4801
2012-12-10 11:51:08	16.69	19.15	1.74379	-17.0133	-19.5209
2012-12-10 12:01:08	16.75	19.2	1.75073	-17.0744	-19.5719
2012-12-10 12:11:08	16.78	19.24	1.75768	-17.105	-19.6126
2012-12-10 12:21:08	16.82	19.28	1.76462	-17.1458	-19.6534	2012-12-10 12:21:08
2012-12-10 12:31:08	16.87	19.31	1.77157	-17.1967	-19.684
2012-12-10 12:41:08	16.9	19.35	1.77851	-17.2273	-19.7248
2012-12-10 12:51:08	16.93	19.37	1.78545	-17.2579	-19.7452
2012-12-10 13:01:08	16.98	19.44	1.7924	-17.3089	-19.8165
2012-12-10 13:08:40	17.02	19.47	1.79764	-17.3496	-19.8471
2012-12-10 13:09:40	17.02	19.48	1.79833	-17.3496	-19.8573	2012-12-10 13:09:40
2012-12-10 13:10:40	17.04	19.48	1.79902	-17.37	-19.8573
2012-12-10 13:11:40	16.8	19.25	1.79972	-17.1254	-19.6228
2012-12-10 13:12:40	16.84	19.3	1.80041	-17.1662	-19.6738
2012-12-10 13:13:40	16.86	19.3	1.80111	-17.1865	-19.6738
2012-12-10 13:14:40	16.88	19.3	1.8018	-17.2069	-19.6738
2012-12-10 13:15:40	16.92	19.35	1.8025	-17.2477	-19.7248	2012-12-10 13:15:40
2012-12-10 13:16:40	16.94	19.38	1.80319	-17.2681	-19.7554
2012-12-10 13:17:40	16.95	19.4	1.80389	-17.2783	-19.7757
2012-12-10 13:18:40	16.98	19.39	1.80458	-17.3089	-19.7655
2012-12-10 13:19:40	16.98	19.44	1.80527	-17.3089	-19.8165
2012-12-10 13:20:40	17	19.46	1.80597	-17.3293	-19.8369
2012-12-10 13:21:40	17.01	19.46	1.80666	-17.3394	-19.8369	2012-12-10 13:21:40
2012-12-10 13:22:40	17.02	19.46	1.80736	-17.3496	-19.8369
2012-12-10 13:23:40	17.02	19.46	1.80805	-17.3496	-19.8369
2012-12-10 13:24:40	17.02	19.48	1.80875	-17.3496	-19.8573
2012-12-10 13:25:40	17.03	19.46	1.80944	-17.3598	-19.8369
2012-12-10 13:26:40	17.02	19.47	1.81014	-17.3496	-19.8471
2012-12-10 13:27:40	17.03	19.48	1.81083	-17.3598	-19.8573	2012-12-10 13:27:40
2012-12-10 13:28:40	17.02	19.47	1.81152	-17.3496	-19.8471
2012-12-10 13:29:40	17.03	19.48	1.81222	-17.3598	-19.8573
2012-12-10 13:30:40	17.03	19.48	1.81291	-17.3598	-19.8573
2012-12-10 13:31:40	17.05	19.5	1.81361	-17.3802	-19.8777
2012-12-10 13:32:40	17.03	19.48	1.8143	-17.3598	-19.8573
2012-12-10 13:33:40	17.05	19.49	1.815	-17.3802	-19.8675	2012-12-10 13:33:40
2012-12-10 13:34:40	17.05	19.5	1.81569	-17.3802	-19.8777
2012-12-10 13:35:40	17.04	19.49	1.81639	-17.37	-19.8675
2012-12-10 13:36:40	17.09	19.53	1.81708	-17.421	-19.9083
2012-12-10 13:37:40	17.06	19.5	1.81777	-17.3904	-19.8777
2012-12-10 13:38:40	17.08	19.53	1.81847	-17.4108	-19.9083
2012-12-10 13:39:40	17.08	19.53	1.81916	-17.4108	-19.9083	2012-12-10 13:39:40
2012-12-10 13:40:40	17.08	19.52	1.81986	-17.4108	-19.8981
2012-12-10 13:41:40	17.09	19.52	1.82055	-17.421	-19.8981
2012-12-10 13:42:40	17.09	19.54	1.82125	-17.421	-19.9185
2012-12-10 13:43:40	17.12	19.55	1.82194	-17.4516	-19.9286
2012-12-10 13:44:40	17.1	19.54	1.82264	-17.4312	-19.9185
2012-12-10 13:45:40	17.09	19.54	1.82333	-17.421	-19.9185	2012-12-10 13:45:40
2012-12-10 13:46:40	17.11	19.57	1.82402	-17.4414	-19.949
2012-12-10 13:47:40	17.11	19.56	1.82472	-17.4414	-19.9388
2012-12-10 13:48:40	17.12	19.57	1.82541	-17.4516	-19.949
2012-12-10 13:49:40	17.14	19.56	1.82611	-17.472	-19.9388
2012-12-10 13:50:40	17.11	19.56	1.8268	-17.4414	-19.9388
2012-12-10 13:51:40	17.13	19.57	1.8275	-17.4618	-19.949	2012-12-10 13:51:40
2012-12-10 13:52:40	17.14	19.57	1.82819	-17.472	-19.949
2012-12-10 13:53:40	17.13	19.55	1.82889	-17.4618	-19.9286
2012-12-10 13:54:40	17.15	19.6	1.82958	-17.4822	-19.9796
2012-12-10 13:55:40	17.15	19.6	1.83027	-17.4822	-19.9796
2012-12-10 13:56:40	17.15	19.6	1.83097	-17.4822	-19.9796
2012-12-10 13:57:40	17.13	19.57	1.83166	-17.4618	-19.949	2012-12-10 13:57:40
2012-12-10 13:58:40	17.16	19.6	1.83236	-17.4924	-19.9796
2012-12-10 13:59:40	17.13	19.58	1.83305	-17.4618	-19.9592
2012-12-10 14:00:40	17.13	19.6	1.83375	-17.4618	-19.9796
2012-12-10 14:01:40	17.17	19.61	1.83444	-17.5025	-19.9898
2012-12-10 14:02:40	17.17	19.62	1.83514	-17.5025	-20
2012-12-10 14:03:40	17.15	19.6	1.83583	-17.4822	-19.9796	2012-12-10 14:03:40
2012-12-10 14:04:40	17.17	19.62	1.83652	-17.5025	-20
2012-12-10 14:05:40	17.17	19.61	1.83722	-17.5025	-19.9898
2012-12-10 14:06:40	17.18	19.63	1.83791	-17.5127	-20.0102
2012-12-10 14:07:40	17.2	19.64	1.83861	-17.5331	-20.0204
2012-12-10 14:08:40	17.16	19.61	1.8393	-17.4924	-19.9898
2012-12-10 14:18:40	17.23	19.66	1.84625	-17.5637	-20.0408	2012-12-10 14:18:40
2012-12-10 14:28:40	17.27	19.72	1.85319	-17.6045	-20.1019
2012-12-10 14:38:40	17.33	19.77	1.86014	-17.6656	-20.1529
2012-12-10 14:48:40	17.38	19.83	1.86708	-17.7166	-20.2141
2012-12-10 14:58:40	17.41	19.86	1.87402	-17.7472	-20.2446
2012-12-10 15:08:40	17.48	19.92	1.88097	-17.8186	-20.3058
2012-12-10 15:18:40	17.53	19.96	1.88791	-17.8695	-20.3466	2012-12-10 15:18:40
2012-12-10 15:28:40	17.55	19.99	1.89486	-17.8899	-20.3772
2012-12-10 15:38:40	17.58	20.02	1.9018	-17.9205	-20.4077
2012-12-10 15:48:40	17.68	20.11	1.90875	-18.0224	-20.4995
2012-12-10 15:58:40	17.71	20.15	1.91569	-18.053	-20.5403
2012-12-10 16:08:40	17.76	20.21	1.92264	-18.104	-20.6014
2012-12-10 16:18:40	17.79	20.23	1.92958	-18.1346	-20.6218	2012-12-10 16:18:40
2012-12-10 16:28:40	17.76	20.2	1.93652	-18.104	-20.5912
2012-12-10 16:38:40	17.84	20.28	1.94347	-18.1855	-20.6728
2012-12-10 16:48:40	17.84	20.28	1.95041	-18.1855	-20.6728
2012-12-10 16:58:40	17.94	20.39	1.95736	-18.2875	-20.7849
2012-12-10 17:08:40	17.97	20.39	1.9643	-18.318	-20.7849
2012-12-10 17:18:40	18	20.43	1.97125	-18.3486	-20.8257	2012-12-10 17:18:40
2012-12-10 17:28:40	18.02	20.46	1.97819	-18.369	-20.8563
2012-12-10 17:38:40	18.05	20.49	1.98514	-18.3996	-20.8869
2012-12-10 17:48:40	17.96	20.4	1.99208	-18.3078	-20.7951
2012-12-10 17:58:40	18.12	20.55	1.99902	-18.4709	-20.948
2012-12-10 18:08:40	18.14	20.6	2.00597	-18.4913	-20.999
2012-12-10 18:18:40	18.22	20.67	2.01291	-18.5729	-21.0703	2012-12-10 18:18:40
2012-12-10 18:28:40	18.26	20.71	2.01986	-18.6137	-21.1111
2012-12-10 18:38:40	18.06	20.51	2.0268	-18.4098	-20.9072
2012-12-10 18:48:40	18.19	20.65	2.03375	-18.5423	-21.0499
2012-12-10 18:58:40	18.27	20.71	2.04069	-18.6239	-21.1111
2012-12-10 19:08:40	18.31	20.76	2.04764	-18.6646	-21.1621
2012-12-10 19:18:40	18.35	20.81	2.05458	-18.7054	-21.213	2012-12-10 19:18:40
2012-12-10 19:28:40	18.41	20.87	2.06152	-18.7666	-21.2742
2012-12-10 19:38:40	18.47	20.93	2.06847	-18.8277	-21.3354
2012-12-10 19:48:40	18.49	20.95	2.07541	-18.8481	-21.3558
2012-12-10 19:58:40	18.52	20.98	2.08236	-18.8787	-21.3863
2012-12-10 20:08:40	18.57	21.03	2.0893	-18.9297	-21.4373
2012-12-10 20:18:40	18.63	21.08	2.09625	-18.9908	-21.4883	2012-12-10 20:18:40
2012-12-10 20:28:40	18.68	21.11	2.10319	-19.0418	-21.5189
2012-12-10 20:38:40	18.69	21.14	2.11014	-19.052	-21.5494
2012-12-10 20:48:40	18.74	21.19	2.11708	-19.103	-21.6004
2012-12-10 20:58:40	18.78	21.23	2.12402	-19.1437	-21.6412
2012-12-10 21:08:40	18.81	21.27	2.13097	-19.1743	-21.682
2012-12-10 21:18:40	18.86	21.31	2.13791	-19.2253	-21.7227	2012-12-10 21:18:40
2012-12-10 21:28:40	18.92	21.37	2.14486	-19.2864	-21.7839
2012-12-10 21:38:40	18.96	21.41	2.1518	-19.3272	-21.8247
2012-12-10 21:48:40	19.02	21.45	2.15875	-19.3884	-21.8654
2012-12-10 21:58:40	19.03	21.49	2.16569	-19.3986	-21.9062
2012-12-10 22:08:40	19.09	21.52	2.17264	-19.4597	-21.9368
2012-12-10 22:18:40	19.13	21.58	2.17958	-19.5005	-21.998	2012-12-10 22:18:40
2012-12-10 22:28:40	19.2	21.64	2.18652	-19.5719	-22.0591
2012-12-10 22:38:40	19.23	21.69	2.19347	-19.6024	-22.1101
2012-12-10 22:48:40	19.27	21.73	2.20041	-19.6432	-22.1509
2012-12-10 22:58:40	19.32	21.77	2.20736	-19.6942	-22.1916
2012-12-10 23:08:40	19.16	21.61	2.2143	-19.5311	-22.0285
2012-12-10 23:18:40	18.88	21.34	2.22125	-19.2457	-21.7533	2012-12-10 23:18:40
2012-12-10 23:28:40	19.08	21.54	2.22819	-19.4495	-21.9572
2012-12-10 23:38:40	19.25	21.71	2.23514	-19.6228	-22.1305
2012-12-10 23:48:40	19.32	21.79	2.24208	-19.6942	-22.212
2012-12-10 23:58:40	19.33	21.81	2.24902	-19.7044	-22.2324
2012-12-11 00:08:40	19.4	21.85	2.25597	-19.7757	-22.2732
2012-12-11 00:18:40	19.44	21.92	2.26291	-19.8165	-22.3445	2012-12-11 00:18:40
2012-12-11 00:28:40	19.48	21.95	2.26986	-19.8573	-22.3751
2012-12-11 00:38:40	19.51	21.98	2.2768	-19.8879	-22.4057
2012-12-11 00:48:40	19.32	21.77	2.28375	-19.6942	-22.1916
2012-12-11 00:58:40	19.52	22	2.29069	-19.8981	-22.4261
2012-12-11 01:08:40	19.57	22.04	2.29764	-19.949	-22.4669
2012-12-11 01:18:40	19.62	22.07	2.30458	-20	-22.4975	2012-12-11 01:18:40
2012-12-11 01:28:40	19.66	22.13	2.31152	-20.0408	-22.5586
2012-12-11 01:38:40	19.71	22.18	2.31847	-20.0917	-22.6096
2012-12-11 01:48:40	19.76	22.23	2.32541	-20.1427	-22.6606
2012-12-11 01:58:40	19.8	22.27	2.33236	-20.1835	-22.7013
2012-12-11 02:08:40	19.84	22.31	2.3393	-20.2243	-22.7421
2012-12-11 02:18:40	19.89	22.36	2.34625	-20.2752	-22.7931	2012-12-11 02:18:40
2012-12-11 02:28:40	19.94	22.41	2.35319	-20.3262	-22.844
2012-12-11 02:38:40	19.97	22.44	2.36014	-20.3568	-22.8746
2012-12-11 02:48:40	19.99	22.45	2.36708	-20.3772	-22.8848
2012-12-11 02:58:40	20.04	22.51	2.37402	-20.4281	-22.946
2012-12-11 03:08:40	20.1	22.57	2.38097	-20.4893	-23.0071
2012-12-11 03:18:40	20.11	22.58	2.38791	-20.4995	-23.0173	2012-12-11 03:18:40
2012-12-11 03:28:40	20.19	22.66	2.39486	-20.581	-23.0989
2012-12-11 03:38:40	20.23	22.7	2.4018	-20.6218	-23.1397
2012-12-11 03:48:40	20.28	22.74	2.40875	-20.6728	-23.1804
2012-12-11 03:58:40	20.33	22.77	2.41569	-20.7238	-23.211
2012-12-11 04:08:40	20.35	22.8	2.42264	-20.7441	-23.2416
2012-12-11 04:18:40	20.38	22.85	2.42958	-20.7747	-23.2926	2012-12-11 04:18:40
2012-12-11 04:28:40	20.42	22.88	2.43652	-20.8155	-23.3231
2012-12-11 04:38:40	20.44	22.91	2.44347	-20.8359	-23.3537
2012-12-11 04:48:40	20.45	22.89	2.45041	-20.8461	-23.3333
2012-12-11 04:58:40	20.52	22.97	2.45736	-20.9174	-23.4149
2012-12-11 05:08:40	20.57	23.04	2.4643	-20.9684	-23.4862
2012-12-11 05:18:40	20.61	23.07	2.47125	-21.0092	-23.5168	2012-12-11 05:18:40
2012-12-11 05:28:40	20.63	23.1	2.47819	-21.0296	-23.5474
2012-12-11 05:38:40	20.68	23.15	2.48514	-21.0805	-23.5984
2012-12-11 05:48:40	20.73	23.2	2.49208	-21.1315	-23.6493
2012-12-11 05:58:40	20.75	23.23	2.49902	-21.1519	-23.6799
2012-12-11 06:08:40	20.8	23.27	2.50597	-21.2029	-23.7207
2012-12-11 06:18:40	20.84	23.31	2.51291	-21.2436	-23.7615	2012-12-11 06:18:40
2012-12-11 06:28:40	20.87	23.34	2.51986	-21.2742	-23.792
2012-12-11 06:38:40	20.92	23.38	2.5268	-21.3252	-23.8328
2012-12-11 06:48:40	20.94	23.4	2.53375	-21.3456	-23.8532
2012-12-11 06:58:40	21	23.46	2.54069	-21.4067	-23.9144
2012-12-11 07:08:40	21.04	23.5	2.54764	-21.4475	-23.9551
2012-12-11 07:18:40	21.08	23.55	2.55458	-21.4883	-24.0061	2012-12-11 07:18:40
2012-12-11 07:28:40	21.12	23.59	2.56152	-21.5291	-24.0469
2012-12-11 07:38:40	21.14	23.58	2.56847	-21.5494	-24.0367
2012-12-11 07:48:40	21.18	23.62	2.57541	-21.5902	-24.0775
2012-12-11 07:58:40	21.21	23.69	2.58236	-21.6208	-24.1488
2012-12-11 08:08:40	21.18	23.63	2.5893	-21.5902	-24.0877
2012-12-11 08:18:40	21.29	23.73	2.59625	-21.7023	-24.1896	2012-12-11 08:18:40
2012-12-11 08:28:40	21.32	23.8	2.60319	-21.7329	-24.261
2012-12-11 08:38:40	21.37	23.84	2.61014	-21.7839	-24.3017
2012-12-11 08:48:40	21.4	23.84	2.61708	-21.8145	-24.3017
2012-12-11 08:58:40	21.46	23.92	2.62402	-21.8756	-24.3833
2012-12-11 09:08:40	21.51	23.97	2.63097	-21.9266	-24.4343
2012-12-11 09:18:40	21.54	24.01	2.63791	-21.9572	-24.475	2012-12-11 09:18:40
2012-12-11 09:28:40	21.57	24.04	2.64486	-21.9878	-24.5056
2012-12-11 09:38:40	21.58	24.06	2.6518	-21.998	-24.526
2012-12-11 09:48:40	21.65	24.1	2.65875	-22.0693	-24.5668
2012-12-11 09:58:40	21.7	24.16	2.66569	-22.1203	-24.6279
2012-12-11 10:08:40	21.75	24.21	2.67264	-22.1713	-24.6789
2012-12-11 10:18:40	21.79	24.24	2.67958	-22.212	-24.7095	2012-12-11 10:18:40
2012-12-11 10:28:40	21.8	24.27	2.68652	-22.2222	-24.7401
2012-12-11 10:38:40	21.84	24.3	2.69347	-22.263	-24.7706
2012-12-11 10:48:40	21.9	24.33	2.70041	-22.3242	-24.8012
2012-12-11 10:58:40	21.93	24.38	2.70736	-22.3547	-24.8522
2012-12-11 11:08:40	21.97	24.43	2.7143	-22.3955	-24.9032
2012-12-11 11:18:40	22	24.45	2.72125	-22.4261	-24.9235	2012-12-11 11:18:40
2012-12-11 11:28:40	22.06	24.51	2.72819	-22.4873	-24.9847
2012-12-11 11:38:40	22.1	24.55	2.73514	-22.528	-25.0255
2012-12-11 11:48:40	22.16	24.61	2.74208	-22.5892	-25.0866
2012-12-11 11:58:40	21.68	24.13	2.74902	-22.0999	-24.5973
2012-12-11 12:08:40	21.85	24.29	2.75597	-22.2732	-24.7604
2012-12-11 12:18:40	22.02	24.48	2.76291	-22.4465	-24.9541	2012-12-11 12:18:40
2012-12-11 12:28:40	22.15	24.6	2.76986	-22.579	-25.0765
2012-12-11 12:38:40	22.2	24.64	2.7768	-22.63	-25.1172
2012-12-11 12:48:40	22.25	24.7	2.78375	-22.6809	-25.1784
2012-12-11 12:58:40	22.31	24.76	2.79069	-22.7421	-25.2396
2012-12-11 13:08:40	22.34	24.79	2.79764	-22.7727	-25.2701
2012-12-11 13:18:40	22.37	24.82	2.80458	-22.8033	-25.3007	2012-12-11 13:18:40
2012-12-11 13:28:40	22.42	24.85	2.81152	-22.8542	-25.3313
2012-12-11 13:38:40	22.47	24.92	2.81847	-22.9052	-25.4027
2012-12-11 13:48:40	22.51	24.97	2.82541	-22.946	-25.4536
2012-12-11 13:58:40	22.55	24.99	2.83236	-22.9867	-25.474
2012-12-11 14:08:40	22.59	25.04	2.8393	-23.0275	-25.525
2012-12-11 14:18:40	22.63	25.08	2.84625	-23.0683	-25.5657	2012-12-11 14:18:40
2012-12-11 14:28:40	22.67	25.1	2.85319	-23.1091	-25.5861
2012-12-11 14:38:40	22.7	25.15	2.86014	-23.1397	-25.6371
2012-12-11 14:48:40	22.76	25.2	2.86708	-23.2008	-25.6881
2012-12-11 14:58:40	22.82	25.26	2.87402	-23.262	-25.7492
2012-12-11 15:08:40	22.84	25.28	2.88097	-23.2824	-25.7696
2012-12-11 15:18:40	22.92	25.34	2.88791	-23.3639	-25.8308	2012-12-11 15:18:40
2012-12-11 15:28:40	22.93	25.38	2.89486	-23.3741	-25.8716
2012-12-11 15:38:40	22.97	25.41	2.9018	-23.4149	-25.9021
2012-12-11 15:48:40	23.02	25.45	2.90875	-23.4659	-25.9429
2012-12-11 15:58:40	23.06	25.5	2.91569	-23.5066	-25.9939
2012-12-11 16:08:40	23.1	25.55	2.92264	-23.5474	-26.0449
2012-12-11 16:18:40	23.12	25.57	2.92958	-23.5678	-26.0652	2012-12-11 16:18:40
2012-12-11 16:28:40	23.19	25.64	2.93652	-23.6391	-26.1366
2012-12-11 16:38:40	23.23	25.67	2.94347	-23.6799	-26.1672
2012-12-11 16:48:40	23.3	25.74	2.95041	-23.7513	-26.2385
2012-12-11 16:58:40	23.36	25.81	2.95736	-23.8124	-26.3099
2012-12-11 17:08:40	23.39	25.84	2.9643	-23.843	-26.3405
2012-12-11 17:18:40	23.45	25.88	2.97125	-23.9042	-26.3812	2012-12-11 17:18:40
2012-12-11 17:28:40	23.24	25.67	2.97819	-23.6901	-26.1672
2012-12-11 17:38:40	23.22	25.65	2.98514	-23.6697	-26.1468
2012-12-11 17:48:40	22.77	25.2	2.99208	-23.211	-25.6881
2012-12-11 17:58:40	22.76	25.18	2.99902	-23.2008	-25.6677
2012-12-11 18:08:40	23.05	25.44	3.00597	-23.4964	-25.9327
2012-12-11 18:18:40	23.26	25.68	3.01291	-23.7105	-26.1774	2012-12-11 18:18:40
2012-12-11 18:28:40	23.37	25.81	3.01986	-23.8226	-26.3099
2012-12-11 18:38:40	23.45	25.87	3.0268	-23.9042	-26.371
2012-12-11 18:48:40	23.56	25.99	3.03375	-24.0163	-26.4934
2012-12-11 18:58:40	23.61	26.04	3.04069	-24.0673	-26.5443
2012-12-11 19:08:40	23.67	26.09	3.04764	-24.1284	-26.5953
2012-12-11 19:18:40	23.76	26.18	3.05458	-24.2202	-26.6871	2012-12-11 19:18:40
2012-12-11 19:28:40	23.82	26.22	3.06152	-24.2813	-26.7278
2012-12-11 19:38:40	23.89	26.31	3.06847	-24.3527	-26.8196
2012-12-11 19:48:40	23.96	26.38	3.07541	-24.4241	-26.8909
2012-12-11 19:58:40	24	26.42	3.08236	-24.4648	-26.9317
2012-12-11 20:08:40	24.07	26.49	3.0893	-24.5362	-27.0031
2012-12-11 20:18:40	24.13	26.56	3.09625	-24.5973	-27.0744	2012-12-11 20:18:40
2012-12-11 20:28:40	24.2	26.62	3.10319	-24.6687	-27.1356
2012-12-11 20:38:40	24.27	26.7	3.11014	-24.7401	-27.2171
2012-12-11 20:48:40	24.32	26.74	3.11708	-24.791	-27.2579
2012-12-11 20:58:40	24.37	26.79	3.12402	-24.842	-27.3089
2012-12-11 21:08:40	24.43	26.85	3.13097	-24.9032	-27.37
2012-12-11 21:18:40	24.49	26.91	3.13791	-24.9643	-27.4312	2012-12-11 21:18:40
2012-12-11 21:28:40	24.55	26.95	3.14486	-25.0255	-27.472
2012-12-11 21:38:40	24.57	27	3.1518	-25.0459	-27.5229
2012-12-11 21:48:40	24.63	27.06	3.15875	-25.107	-27.5841
2012-12-11 21:58:40	24.7	27.13	3.16569	-25.1784	-27.6555
2012-12-11 22:08:40	24.76	27.2	3.17264	-25.2396	-27.7268
2012-12-11 22:18:40	24.81	27.24	3.17958	-25.2905	-27.7676	2012-12-11 22:18:40
2012-12-11 22:28:40	24.86	27.28	3.18652	-25.3415	-27.8084
2012-12-11 22:38:40	24.91	27.34	3.19347	-25.3925	-27.8695
2012-12-11 22:48:40	24.93	27.36	3.20041	-25.4128	-27.8899
2012-12-11 22:58:40	25	27.43	3.20736	-25.4842	-27.9613
2012-12-11 23:08:40	25.07	27.49	3.2143	-25.5556	-28.0224
2012-12-11 23:18:40	25.12	27.55	3.22125	-25.6065	-28.0836	2012-12-11 23:18:40
2012-12-11 23:28:40	25.18	27.61	3.22819	-25.6677	-28.1448
2012-12-11 23:38:40	25.24	27.66	3.23514	-25.7288	-28.1957
2012-12-11 23:48:40	25.29	27.72	3.24208	-25.7798	-28.2569
2012-12-11 23:58:40	25.33	27.75	3.24902	-25.8206	-28.2875
2012-12-12 00:08:40	25.38	27.79	3.25597	-25.8716	-28.3282
2012-12-12 00:18:40	25.44	27.84	3.26291	-25.9327	-28.3792	2012-12-12 00:18:40
2012-12-12 00:28:40	25.48	27.91	3.26986	-25.9735	-28.4506
2012-12-12 00:38:40	25.52	27.94	3.2768	-26.0143	-28.4811
2012-12-12 00:48:40	25.55	27.97	3.28375	-26.0449	-28.5117
2012-12-12 00:58:40	25.63	28.04	3.29069	-26.1264	-28.5831
2012-12-12 01:08:40	25.66	28.07	3.29764	-26.157	-28.6137
2012-12-12 01:18:40	25.71	28.13	3.30458	-26.208	-28.6748	2012-12-12 01:18:40
2012-12-12 01:28:40	25.77	28.19	3.31152	-26.2691	-28.736
2012-12-12 01:38:40	25.82	28.26	3.31847	-26.3201	-28.8073
2012-12-12 01:48:40	25.87	28.29	3.32541	-26.371	-28.8379
2012-12-12 01:58:40	25.93	28.33	3.33236	-26.4322	-28.8787
2012-12-12 02:08:40	25.97	28.38	3.3393	-26.473	-28.9297
2012-12-12 02:18:40	26.02	28.44	3.34625	-26.524	-28.9908	2012-12-12 02:18:40
2012-12-12 02:28:40	26.06	28.49	3.35319	-26.5647	-29.0418
2012-12-12 02:38:40	26.11	28.54	3.36014	-26.6157	-29.0928
2012-12-12 02:48:40	26.14	28.57	3.36708	-26.6463	-29.1233
2012-12-12 02:58:40	26.2	28.62	3.37402	-26.7074	-29.1743
2012-12-12 03:08:40	26.17	28.59	3.38097	-26.6769	-29.1437
2012-12-12 03:18:40	26.26	28.69	3.38791	-26.7686	-29.2457	2012-12-12 03:18:40
2012-12-12 03:28:40	26.33	28.75	3.39486	-26.84	-29.3068
2012-12-12 03:38:40	26.35	28.79	3.4018	-26.8603	-29.3476
2012-12-12 03:48:40	26.42	28.84	3.40875	-26.9317	-29.3986
2012-12-12 03:58:40	26.45	28.87	3.41569	-26.9623	-29.4292
2012-12-12 04:08:40	26.5	28.93	3.42264	-27.0133	-29.4903
2012-12-12 04:18:40	26.56	28.98	3.42958	-27.0744	-29.5413	2012-12-12 04:18:40
2012-12-12 04:28:40	26.61	29.03	3.43652	-27.1254	-29.5923
2012-12-12 04:38:40	26.65	29.07	3.44347	-27.1662	-29.633
2012-12-12 04:48:40	26.66	29.09	3.45041	-27.1764	-29.6534
2012-12-12 04:58:40	26.72	29.15	3.45736	-27.2375	-29.7146
2012-12-12 05:08:40	26.74	29.2	3.4643	-27.2579	-29.7655
2012-12-12 05:18:40	26.82	29.24	3.47125	-27.3394	-29.8063	2012-12-12 05:18:40
2012-12-12 05:28:40	26.87	29.28	3.47819	-27.3904	-29.8471
2012-12-12 05:38:40	26.89	29.32	3.48514	-27.4108	-29.8879
2012-12-12 05:48:40	26.94	29.37	3.49208	-27.4618	-29.9388
2012-12-12 05:58:40	26.99	29.41	3.49902	-27.5127	-29.9796
2012-12-12 06:08:40	27.04	29.46	3.50597	-27.5637	-30.0306
2012-12-12 06:18:40	27.07	29.49	3.51291	-27.5943	-30.0612	2012-12-12 06:18:40
2012-12-12 06:28:40	27.14	29.57	3.51986	-27.6656	-30.1427
2012-12-12 06:38:40	27.21	29.62	3.5268	-27.737	-30.1937
2012-12-12 06:48:40	27.25	29.67	3.53375	-27.7778	-30.2446
2012-12-12 06:58:40	27.29	29.72	3.54069	-27.8186	-30.2956
2012-12-12 07:08:40	27.33	29.75	3.54764	-27.8593	-30.3262
2012-12-12 07:18:40	27.38	29.8	3.55458	-27.9103	-30.3772	2012-12-12 07:18:40
2012-12-12 07:28:40	27.42	29.84	3.56152	-27.9511	-30.4179
2012-12-12 07:38:40	27.46	29.87	3.56847	-27.9918	-30.4485
2012-12-12 07:48:40	27.5	29.94	3.57541	-28.0326	-30.5199
2012-12-12 07:58:40	27.57	29.96	3.58236	-28.104	-30.5403
2012-12-12 08:08:40	27.61	30.03	3.5893	-28.1448	-30.6116
2012-12-12 08:18:40	27.64	30.06	3.59625	-28.1753	-30.6422	2012-12-12 08:18:40
2012-12-12 08:28:40	27.68	30.11	3.60319	-28.2161	-30.6932
2012-12-12 08:38:40	27.74	30.17	3.61014	-28.2773	-30.7543
2012-12-12 08:48:40	27.75	30.17	3.61708	-28.2875	-30.7543
2012-12-12 08:58:40	27.81	30.23	3.62402	-28.3486	-30.8155
2012-12-12 09:08:40	27.84	30.27	3.63097	-28.3792	-30.8563
2012-12-12 09:18:40	27.65	30.07	3.63791	-28.1855	-30.6524	2012-12-12 09:18:40
2012-12-12 09:28:40	27.74	30.15	3.64486	-28.2773	-30.7339
2012-12-12 09:38:40	27.87	30.29	3.6518	-28.4098	-30.8767
2012-12-12 09:48:40	27.92	30.34	3.65875	-28.4608	-30.9276
2012-12-12 09:58:40	28	30.4	3.66569	-28.5423	-30.9888
2012-12-12 10:08:40	28.01	30.44	3.67264	-28.5525	-31.0296
2012-12-12 10:18:40	28.06	30.48	3.67958	-28.6035	-31.0703	2012-12-12 10:18:40
2012-12-12 10:28:40	28.1	30.52	3.68652	-28.6442	-31.1111
2012-12-12 10:38:40	28	30.41	3.69347	-28.5423	-30.999
2012-12-12 10:48:40	28.16	30.56	3.70041	-28.7054	-31.1519
2012-12-12 10:58:40	28.18	30.61	3.70736	-28.7258	-31.2029
2012-12-12 11:08:40	28.23	30.63	3.7143	-28.7768	-31.2232
2012-12-12 11:18:40	28.27	30.7	3.72125	-28.8175	-31.2946	2012-12-12 11:18:40
2012-12-12 11:28:40	28.3	30.72	3.72819	-28.8481	-31.315
2012-12-12 11:38:40	28.33	30.76	3.73514	-28.8787	-31.3558
2012-12-12 11:48:40	28.36	30.78	3.74208	-28.9093	-31.3761
2012-12-12 11:58:40	28.43	30.84	3.74902	-28.9806	-31.4373
2012-12-12 12:08:40	28.46	30.89	3.75597	-29.0112	-31.4883
2012-12-12 12:18:40	28.51	30.93	3.76291	-29.0622	-31.5291	2012-12-12 12:18:40
2012-12-12 12:28:40	28.57	30.97	3.76986	-29.1233	-31.5698
2012-12-12 12:38:40	28.6	31.03	3.7768	-29.1539	-31.631
2012-12-12 12:48:40	28.63	31.05	3.78375	-29.1845	-31.6514
2012-12-12 12:58:40	28.67	31.09	3.79069	-29.2253	-31.6922
2012-12-12 13:08:40	28.72	31.14	3.79764	-29.2762	-31.7431
2012-12-12 13:18:40	28.76	31.17	3.80458	-29.317	-31.7737	2012-12-12 13:18:40
2012-12-12 13:28:40	28.81	31.21	3.81152	-29.368	-31.8145
2012-12-12 13:38:40	28.85	31.27	3.81847	-29.4088	-31.8756
2012-12-12 13:48:40	28.89	31.31	3.82541	-29.4495	-31.9164
2012-12-12 13:58:40	28.93	31.35	3.83236	-29.4903	-31.9572
2012-12-12 14:08:40	28.99	31.41	3.8393	-29.5515	-32.0183
2012-12-12 14:18:40	29.02	31.45	3.84625	-29.5821	-32.0591	2012-12-12 14:18:40
2012-12-12 14:28:40	29.09	31.5	3.85319	-29.6534	-32.1101
2012-12-12 14:38:40	29.09	31.51	3.86014	-29.6534	-32.1203
2012-12-12 14:48:40	29.15	31.56	3.86708	-29.7146	-32.1713
2012-12-12 14:58:40	29.2	31.61	3.87402	-29.7655	-32.2222
2012-12-12 15:08:40	29.24	31.66	3.88097	-29.8063	-32.2732
2012-12-12 15:18:40	29.29	31.71	3.88791	-29.8573	-32.3242	2012-12-12 15:18:40
2012-12-12 15:28:40	29.31	31.72	3.89486	-29.8777	-32.3344
2012-12-12 15:38:40	29.37	31.79	3.9018	-29.9388	-32.4057
2012-12-12 15:48:40	29.39	31.81	3.90875	-29.9592	-32.4261
2012-12-12 15:58:40	29.45	31.85	3.91569	-30.0204	-32.4669
2012-12-12 16:08:40	29.47	31.87	3.92264	-30.0408	-32.4873
2012-12-12 16:18:40	29.53	31.94	3.92958	-30.1019	-32.5586	2012-12-12 16:18:40
2012-12-12 16:28:40	29.57	31.98	3.93652	-30.1427	-32.5994
2012-12-12 16:38:40	29.62	32.04	3.94347	-30.1937	-32.6606
2012-12-12 16:48:40	29.65	32.06	3.95041	-30.2243	-32.6809
2012-12-12 16:58:40	29.72	32.11	3.95736	-30.2956	-32.7319
2012-12-12 17:08:40	29.74	32.16	3.9643	-30.316	-32.7829
2012-12-12 17:18:40	29.77	32.19	3.97125	-30.3466	-32.8135	2012-12-12 17:18:40
2012-12-12 17:28:40	29.84	32.26	3.97819	-30.4179	-32.8848
2012-12-12 17:38:40	29.38	31.79	3.98514	-29.949	-32.4057
2012-12-12 17:48:40	29.62	32.04	3.99208	-30.1937	-32.6606
2012-12-12 17:58:40	29.79	32.2	3.99902	-30.367	-32.8236
2012-12-12 18:08:40	29.89	32.32	4.00597	-30.4689	-32.946
2012-12-12 18:18:40	29.93	32.36	4.01291	-30.5097	-32.9867	2012-12-12 18:18:40
2012-12-12 18:28:40	29.98	32.4	4.01986	-30.5607	-33.0275
2012-12-12 18:38:40	30.03	32.46	4.0268	-30.6116	-33.0887
2012-12-12 18:48:40	30.08	32.5	4.03375	-30.6626	-33.1295
2012-12-12 18:58:40	30.13	32.55	4.04069	-30.7136	-33.1804
2012-12-12 19:08:40	30	32.42	4.04764	-30.581	-33.0479
2012-12-12 19:18:40	30.13	32.56	4.05458	-30.7136	-33.1906	2012-12-12 19:18:40
2012-12-12 19:28:40	30.15	32.58	4.06152	-30.7339	-33.211
2012-12-12 19:38:40	30.23	32.66	4.06847	-30.8155	-33.2926
2012-12-12 19:48:40	30.29	32.73	4.07541	-30.8767	-33.3639
2012-12-12 19:58:40	30.34	32.77	4.08236	-30.9276	-33.4047
2012-12-12 20:08:40	30.37	32.8	4.0893	-30.9582	-33.4353
2012-12-12 20:18:40	30.41	32.82	4.09625	-30.999	-33.4557	2012-12-12 20:18:40
2012-12-12 20:28:40	30.48	32.91	4.10319	-31.0703	-33.5474
2012-12-12 20:38:40	30.51	32.95	4.11014	-31.1009	-33.5882
2012-12-12 20:48:40	30.57	33	4.11708	-31.1621	-33.6391
2012-12-12 20:58:40	30.62	33.05	4.12402	-31.213	-33.6901
2012-12-12 21:08:40	30.68	33.11	4.13097	-31.2742	-33.7513
2012-12-12 21:18:40	30.71	33.14	4.13791	-31.3048	-33.7819	2012-12-12 21:18:40
2012-12-12 21:28:40	30.75	33.18	4.14486	-31.3456	-33.8226
2012-12-12 21:38:40	30.8	33.23	4.1518	-31.3965	-33.8736
2012-12-12 21:48:40	30.84	33.24	4.15875	-31.4373	-33.8838
2012-12-12 21:58:40	30.88	33.31	4.16569	-31.4781	-33.9551
2012-12-12 22:08:40	30.93	33.35	4.17264	-31.5291	-33.9959
2012-12-12 22:18:40	30.98	33.4	4.17958	-31.58	-34.0469	2012-12-12 22:18:40
2012-12-12 22:28:40	31.03	33.44	4.18652	-31.631	-34.0877
2012-12-12 22:38:40	31.06	33.49	4.19347	-31.6616	-34.1386
2012-12-12 22:48:40	31.11	33.54	4.20041	-31.7125	-34.1896
2012-12-12 22:58:40	31.17	33.57	4.20736	-31.7737	-34.2202
2012-12-12 23:08:40	31.19	33.62	4.2143	-31.7941	-34.2712
2012-12-12 23:18:40	31.19	33.61	4.22125	-31.7941	-34.261	2012-12-12 23:18:40
2012-12-12 23:28:40	31.24	33.67	4.22819	-31.8451	-34.3221
2012-12-12 23:38:40	31.3	33.73	4.23514	-31.9062	-34.3833
2012-12-12 23:48:40	31.34	33.76	4.24208	-31.947	-34.4139
2012-12-12 23:58:40	31.36	33.78	4.24902	-31.9674	-34.4343
2012-12-13 00:08:40	31.42	33.85	4.25597	-32.0285	-34.5056
2012-12-13 00:18:40	31.4	33.83	4.26291	-32.0082	-34.4852	2012-12-13 00:18:40
2012-12-13 00:28:40	31.47	33.9	4.26986	-32.0795	-34.5566
2012-12-13 00:38:40	31.5	33.93	4.2768	-32.1101	-34.5872
2012-12-13 00:48:40	31.56	33.98	4.28375	-32.1713	-34.6381
2012-12-13 00:58:40	31.6	34.04	4.29069	-32.212	-34.6993
2012-12-13 01:08:40	31.65	34.08	4.29764	-32.263	-34.7401
2012-12-13 01:18:40	31.71	34.13	4.30458	-32.3242	-34.791	2012-12-13 01:18:40
2012-12-13 01:28:40	31.73	34.16	4.31152	-32.3445	-34.8216
2012-12-13 01:38:40	31.78	34.2	4.31847	-32.3955	-34.8624
2012-12-13 01:48:40	31.76	34.18	4.32541	-32.3751	-34.842
2012-12-13 01:58:40	31.82	34.25	4.33236	-32.4363	-34.9134
2012-12-13 02:08:40	31.89	34.32	4.3393	-32.5076	-34.9847
2012-12-13 02:18:40	31.93	34.35	4.34625	-32.5484	-35.0153	2012-12-13 02:18:40
2012-12-13 02:28:40	31.98	34.4	4.35319	-32.5994	-35.0663
2012-12-13 02:38:40	32	34.42	4.36014	-32.6198	-35.0866
2012-12-13 02:48:40	32.05	34.48	4.36708	-32.6707	-35.1478
2012-12-13 02:58:40	32.07	34.49	4.37402	-32.6911	-35.158
2012-12-13 03:08:40	32.01	34.44	4.38097	-32.63	-35.107
2012-12-13 03:18:40	32.13	34.55	4.38791	-32.7523	-35.2192	2012-12-13 03:18:40
2012-12-13 03:28:40	32.17	34.57	4.39486	-32.7931	-35.2396
2012-12-13 03:38:40	32.19	34.63	4.4018	-32.8135	-35.3007
2012-12-13 03:48:40	32.22	34.63	4.40875	-32.844	-35.3007
2012-12-13 03:58:40	32.27	34.7	4.41569	-32.895	-35.3721
2012-12-13 04:08:40	32.32	34.75	4.42264	-32.946	-35.423
2012-12-13 04:18:40	32.38	34.81	4.42958	-33.0071	-35.4842	2012-12-13 04:18:40
2012-12-13 04:28:40	32.43	34.85	4.43652	-33.0581	-35.525
2012-12-13 04:38:40	32.42	34.86	4.44347	-33.0479	-35.5352
2012-12-13 04:48:40	32.51	34.95	4.45041	-33.1397	-35.6269
2012-12-13 04:58:40	32.55	34.98	4.45736	-33.1804	-35.6575
2012-12-13 05:08:40	32.62	35.03	4.4643	-33.2518	-35.7085
2012-12-13 05:18:40	32.67	35.09	4.47125	-33.3028	-35.7696	2012-12-13 05:18:40
2012-12-13 05:28:40	32.67	35.11	4.47819	-33.3028	-35.79
2012-12-13 05:38:40	32.74	35.15	4.48514	-33.3741	-35.8308
2012-12-13 05:48:40	32.77	35.19	4.49208	-33.4047	-35.8716
2012-12-13 05:58:40	32.82	35.25	4.49902	-33.4557	-35.9327
2012-12-13 06:08:40	32.86	35.27	4.50597	-33.4964	-35.9531
2012-12-13 06:18:40	32.88	35.31	4.51291	-33.5168	-35.9939	2012-12-13 06:18:40
2012-12-13 06:28:40	32.93	35.36	4.51986	-33.5678	-36.0449
2012-12-13 06:38:40	32.98	35.4	4.5268	-33.6188	-36.0856
2012-12-13 06:48:40	33.03	35.45	4.53375	-33.6697	-36.1366
2012-12-13 06:58:40	33.08	35.51	4.54069	-33.7207	-36.1978
2012-12-13 07:08:40	33.14	35.56	4.54764	-33.7819	-36.2487
2012-12-13 07:18:40	33.17	35.59	4.55458	-33.8124	-36.2793	2012-12-13 07:18:40
2012-12-13 07:28:40	33.24	35.63	4.56152	-33.8838	-36.3201
2012-12-13 07:38:40	33.27	35.69	4.56847	-33.9144	-36.3812
2012-12-13 07:48:40	33.29	35.73	4.57541	-33.9348	-36.422
2012-12-13 07:58:40	33.38	35.81	4.58236	-34.0265	-36.5036
2012-12-13 08:08:40	33.41	35.83	4.5893	-34.0571	-36.524
2012-12-13 08:18:40	33.44	35.87	4.59625	-34.0877	-36.5647	2012-12-13 08:18:40
2012-12-13 08:28:40	33.51	35.94	4.60319	-34.159	-36.6361
2012-12-13 08:38:40	33.55	35.96	4.61014	-34.1998	-36.6565
2012-12-13 08:48:40	33.59	36.03	4.61708	-34.2406	-36.7278
2012-12-13 08:58:40	33.64	36.07	4.62402	-34.2915	-36.7686
2012-12-13 09:08:40	33.7	36.12	4.63097	-34.3527	-36.8196
2012-12-13 09:18:40	33.74	36.14	4.63791	-34.3935	-36.84	2012-12-13 09:18:40
2012-12-13 09:28:40	33.77	36.16	4.64486	-34.4241	-36.8603
2012-12-13 09:38:40	33.8	36.21	4.6518	-34.4546	-36.9113
2012-12-13 09:48:40	33.86	36.28	4.65875	-34.5158	-36.9827
2012-12-13 09:58:40	33.64	36.07	4.66569	-34.2915	-36.7686
2012-12-13 10:08:40	33.84	36.27	4.67264	-34.4954	-36.9725
2012-12-13 10:18:40	33.89	36.33	4.67958	-34.5464	-37.0336	2012-12-13 10:18:40
2012-12-13 10:28:40	33.96	36.39	4.68652	-34.6177	-37.0948
2012-12-13 10:38:40	34.01	36.44	4.69347	-34.6687	-37.1458
2012-12-13 10:48:40	34.06	36.49	4.70041	-34.7197	-37.1967
2012-12-13 10:58:40	34.11	36.53	4.70736	-34.7706	-37.2375
2012-12-13 11:08:40	34.18	36.6	4.7143	-34.842	-37.3089
2012-12-13 11:18:40	34.23	36.65	4.72125	-34.893	-37.3598	2012-12-13 11:18:40
2012-12-13 11:28:40	34.27	36.67	4.72819	-34.9337	-37.3802
2012-12-13 11:38:40	34.34	36.77	4.73514	-35.0051	-37.4822
2012-12-13 11:48:40	34.29	36.73	4.74208	-34.9541	-37.4414
2012-12-13 11:58:40	34.4	36.83	4.74902	-35.0663	-37.5433
2012-12-13 12:08:40	34.47	36.89	4.75597	-35.1376	-37.6045
2012-12-13 12:18:40	34.53	36.96	4.76291	-35.1988	-37.6758	2012-12-13 12:18:40
2012-12-13 12:28:40	34.58	36.99	4.76986	-35.2497	-37.7064
2012-12-13 12:38:40	34.62	37.04	4.7768	-35.2905	-37.7574
2012-12-13 12:48:40	34.7	37.11	4.78375	-35.3721	-37.8287
2012-12-13 12:58:40	34.71	37.12	4.79069	-35.3823	-37.8389
2012-12-13 13:08:40	34.76	37.18	4.79764	-35.4332	-37.9001
2012-12-13 13:18:40	34.8	37.23	4.80458	-35.474	-37.9511	2012-12-13 13:18:40
2012-12-13 13:28:40	34.59	37	4.81152	-35.2599	-37.7166
2012-12-13 13:38:40	34.5	36.92	4.81847	-35.1682	-37.6351
2012-12-13 13:48:40	34.71	37.12	4.82541	-35.3823	-37.8389
2012-12-13 13:58:40	34.79	37.2	4.83236	-35.4638	-37.9205
2012-12-13 14:08:40	34.85	37.25	4.8393	-35.525	-37.9715
2012-12-13 14:18:40	34.87	37.26	4.84625	-35.5454	-37.9817	2012-12-13 14:18:40
2012-12-13 14:28:40	34.91	37.31	4.85319	-35.5861	-38.0326
2012-12-13 14:38:40	34.94	37.35	4.86014	-35.6167	-38.0734
2012-12-13 14:48:40	35	37.4	4.86708	-35.6779	-38.1244
2012-12-13 14:58:40	35.04	37.45	4.87402	-35.7187	-38.1753
2012-12-13 15:08:40	35.11	37.51	4.88097	-35.79	-38.2365
2012-12-13 15:18:40	35.18	37.58	4.88791	-35.8614	-38.3078	2012-12-13 15:18:40
2012-12-13 15:28:40	35.23	37.63	4.89486	-35.9123	-38.3588
2012-12-13 15:38:40	35.28	37.68	4.9018	-35.9633	-38.4098
2012-12-13 15:48:40	35.28	37.67	4.90875	-35.9633	-38.3996
2012-12-13 15:58:40	35.4	37.78	4.91569	-36.0856	-38.5117
2012-12-13 16:08:40	35.44	37.85	4.92264	-36.1264	-38.5831
2012-12-13 16:18:40	35.47	37.88	4.92958	-36.157	-38.6137	2012-12-13 16:18:40
2012-12-13 16:28:40	35.56	37.96	4.93652	-36.2487	-38.6952
2012-12-13 16:38:40	35.62	38.03	4.94347	-36.3099	-38.7666
2012-12-13 16:48:40	35.67	38.08	4.95041	-36.3609	-38.8175
2012-12-13 16:58:40	35.74	38.15	4.95736	-36.4322	-38.8889
2012-12-13 17:08:40	35.82	38.2	4.9643	-36.5138	-38.9399
2012-12-13 17:18:40	35.84	38.23	4.97125	-36.5341	-38.9704	2012-12-13 17:18:40
2012-12-13 17:28:40	35.92	38.3	4.97819	-36.6157	-39.0418
2012-12-13 17:38:40	36	38.38	4.98514	-36.6972	-39.1233
2012-12-13 17:48:40	36.02	38.44	4.99208	-36.7176	-39.1845
2012-12-13 17:58:40	36.11	38.52	4.99902	-36.8094	-39.2661
2012-12-13 18:08:40	36.18	38.59	5.00597	-36.8807	-39.3374
2012-12-13 18:18:40	36.25	38.64	5.01291	-36.9521	-39.3884	2012-12-13 18:18:40
2012-12-13 18:28:40	36.28	38.69	5.01986	-36.9827	-39.4393
2012-12-13 18:38:40	36.33	38.74	5.0268	-37.0336	-39.4903
2012-12-13 18:48:40	36.41	38.81	5.03375	-37.1152	-39.5617
2012-12-13 18:58:40	36.45	38.86	5.04069	-37.156	-39.6126
2012-12-13 19:08:40	36.5	38.91	5.04764	-37.2069	-39.6636
2012-12-13 19:18:40	36.56	38.95	5.05458	-37.2681	-39.7044	2012-12-13 19:18:40
2012-12-13 19:28:40	36.63	39.02	5.06152	-37.3394	-39.7757
2012-12-13 19:38:40	36.69	39.09	5.06847	-37.4006	-39.8471
2012-12-13 19:48:40	36.72	39.13	5.07541	-37.4312	-39.8879
2012-12-13 19:58:40	36.83	39.23	5.08236	-37.5433	-39.9898
2012-12-13 20:08:40	36.83	39.25	5.0893	-37.5433	-40.0102
2012-12-13 20:18:40	36.92	39.32	5.09625	-37.6351	-40.0815	2012-12-13 20:18:40
2012-12-13 20:28:40	36.97	39.39	5.10319	-37.686	-40.1529
2012-12-13 20:38:40	37.03	39.45	5.11014	-37.7472	-40.2141
2012-12-13 20:48:40	37.09	39.5	5.11708	-37.8084	-40.265
2012-12-13 20:58:40	37.11	39.53	5.12402	-37.8287	-40.2956
2012-12-13 21:08:40	37.2	39.61	5.13097	-37.9205	-40.3772
2012-12-13 21:18:40	37.26	39.67	5.13791	-37.9817	-40.4383	2012-12-13 21:18:40
2012-12-13 21:28:40	37.34	39.74	5.14486	-38.0632	-40.5097
2012-12-13 21:38:40	37.4	39.81	5.1518	-38.1244	-40.581
2012-12-13 21:48:40	37.41	39.86	5.15875	-38.1346	-40.632
2012-12-13 21:58:40	37.42	39.83	5.16569	-38.1448	-40.6014
2012-12-13 22:08:40	37.23	39.63	5.17264	-37.9511	-40.3976
2012-12-13 22:18:40	37.39	39.79	5.17958	-38.1142	-40.5607	2012-12-13 22:18:40
2012-12-13 22:28:40	37.49	39.89	5.18652	-38.2161	-40.6626
2012-12-13 22:38:40	37.56	39.96	5.19347	-38.2875	-40.7339
2012-12-13 22:48:40	37.64	40.05	5.20041	-38.369	-40.8257
2012-12-13 22:58:40	37.71	40.12	5.20736	-38.4404	-40.897
2012-12-13 23:08:40	37.76	40.18	5.2143	-38.4913	-40.9582
2012-12-13 23:18:40	37.81	40.22	5.22125	-38.5423	-40.999	2012-12-13 23:18:40
2012-12-13 23:28:40	37.88	40.3	5.22819	-38.6137	-41.0805
2012-12-13 23:38:40	37.9	40.31	5.23514	-38.634	-41.0907
2012-12-13 23:48:40	37.97	40.37	5.24208	-38.7054	-41.1519
2012-12-13 23:58:40	38.03	40.45	5.24902	-38.7666	-41.2334
2012-12-14 00:08:40	38.08	40.5	5.25597	-38.8175	-41.2844
2012-12-14 00:18:40	38.16	40.57	5.26291	-38.8991	-41.3558	2012-12-14 00:18:40
2012-12-14 00:28:40	38.23	40.64	5.26986	-38.9704	-41.4271
2012-12-14 00:38:40	38.28	40.69	5.2768	-39.0214	-41.4781
2012-12-14 00:48:40	38.35	40.76	5.28375	-39.0928	-41.5494
2012-12-14 00:58:40	38.42	40.83	5.29069	-39.1641	-41.6208
2012-12-14 01:08:40	38.47	40.87	5.29764	-39.2151	-41.6616
2012-12-14 01:18:40	38.53	40.93	5.30458	-39.2762	-41.7227	2012-12-14 01:18:40
2012-12-14 01:28:40	38.58	40.99	5.31152	-39.3272	-41.7839
2012-12-14 01:38:40	38.64	41.04	5.31847	-39.3884	-41.8349
2012-12-14 01:48:40	38.7	41.12	5.32541	-39.4495	-41.9164
2012-12-14 01:58:40	38.76	41.18	5.33236	-39.5107	-41.9776
2012-12-14 02:08:40	38.81	41.24	5.3393	-39.5617	-42.0387
2012-12-14 02:18:40	38.87	41.27	5.34625	-39.6228	-42.0693	2012-12-14 02:18:40
2012-12-14 02:28:40	38.93	41.35	5.35319	-39.684	-42.1509
2012-12-14 02:38:40	38.99	41.4	5.36014	-39.7452	-42.2018
2012-12-14 02:48:40	39.07	41.49	5.36708	-39.8267	-42.2936
2012-12-14 02:58:40	39.11	41.52	5.37402	-39.8675	-42.3242
2012-12-14 03:08:40	39.19	41.61	5.38097	-39.949	-42.4159
2012-12-14 03:18:40	39.24	41.66	5.38791	-40	-42.4669	2012-12-14 03:18:40
2012-12-14 03:28:40	39.28	41.69	5.39486	-40.0408	-42.4975
2012-12-14 03:38:40	39.36	41.77	5.4018	-40.1223	-42.579
2012-12-14 03:48:40	39.39	41.81	5.40875	-40.1529	-42.6198
2012-12-14 03:58:40	39.47	41.88	5.41569	-40.2345	-42.6911
2012-12-14 04:08:40	39.5	41.93	5.42264	-40.265	-42.7421
2012-12-14 04:18:40	39.52	41.94	5.42958	-40.2854	-42.7523	2012-12-14 04:18:40
2012-12-14 04:28:40	39.58	41.98	5.43652	-40.3466	-42.7931
2012-12-14 04:38:40	39.64	42.07	5.44347	-40.4077	-42.8848
2012-12-14 04:48:40	39.65	42.07	5.45041	-40.4179	-42.8848
2012-12-14 04:58:40	39.73	42.15	5.45736	-40.4995	-42.9664
2012-12-14 05:08:40	39.79	42.22	5.4643	-40.5607	-43.0377
2012-12-14 05:18:40	39.84	42.26	5.47125	-40.6116	-43.0785	2012-12-14 05:18:40
2012-12-14 05:28:40	39.92	42.33	5.47819	-40.6932	-43.1498
2012-12-14 05:38:40	39.95	42.37	5.48514	-40.7238	-43.1906
2012-12-14 05:48:40	40	42.43	5.49208	-40.7747	-43.2518
2012-12-14 05:58:40	40.07	42.49	5.49902	-40.8461	-43.3129
2012-12-14 06:08:40	40.12	42.54	5.50597	-40.897	-43.3639
2012-12-14 06:18:40	40.17	42.6	5.51291	-40.948	-43.4251	2012-12-14 06:18:40
2012-12-14 06:28:40	40.23	42.66	5.51986	-41.0092	-43.4862
2012-12-14 06:38:40	40.27	42.7	5.5268	-41.0499	-43.527
2012-12-14 06:48:40	40.3	42.72	5.53375	-41.0805	-43.5474
2012-12-14 06:58:40	40.24	42.67	5.54069	-41.0194	-43.4964
2012-12-14 07:08:40	40.4	42.81	5.54764	-41.1825	-43.6391
2012-12-14 07:18:40	40.45	42.88	5.55458	-41.2334	-43.7105	2012-12-14 07:18:40
2012-12-14 07:28:40	40.51	42.94	5.56152	-41.2946	-43.7717
2012-12-14 07:38:40	40.55	42.99	5.56847	-41.3354	-43.8226
2012-12-14 07:48:40	40.64	43.07	5.57541	-41.4271	-43.9042
2012-12-14 07:58:40	40.65	43.08	5.58236	-41.4373	-43.9144
2012-12-14 08:08:40	40.63	43.06	5.5893	-41.4169	-43.894
2012-12-14 08:18:40	40.63	43.04	5.59625	-41.4169	-43.8736	2012-12-14 08:18:40
2012-12-14 08:28:40	40.69	43.13	5.60319	-41.4781	-43.9653
2012-12-14 08:38:40	40.75	43.19	5.61014	-41.5392	-44.0265
2012-12-14 08:48:40	40.8	43.23	5.61708	-41.5902	-44.0673
2012-12-14 08:58:40	40.85	43.26	5.62402	-41.6412	-44.0979
2012-12-14 09:08:40	40.9	43.32	5.63097	-41.6922	-44.159
2012-12-14 09:18:40	40.93	43.35	5.63791	-41.7227	-44.1896	2012-12-14 09:18:40
2012-12-14 09:28:40	40.72	43.21	5.64486	-41.5087	-44.0469
2012-12-14 09:38:40	40.85	43.36	5.6518	-41.6412	-44.1998
2012-12-14 09:48:40	40.95	43.45	5.65875	-41.7431	-44.2915
2012-12-14 09:58:40	41.03	43.54	5.66569	-41.8247	-44.3833
2012-12-14 10:08:40	41.09	43.57	5.67264	-41.8858	-44.4139
2012-12-14 10:18:40	41.13	43.64	5.67958	-41.9266	-44.4852	2012-12-14 10:18:40
2012-12-14 10:28:40	41.21	43.71	5.68652	-42.0082	-44.5566
2012-12-14 10:38:40	41.25	43.75	5.69347	-42.0489	-44.5973
2012-12-14 10:48:40	41.28	43.76	5.70041	-42.0795	-44.6075
2012-12-14 10:58:40	41.36	43.86	5.70736	-42.1611	-44.7095
2012-12-14 11:08:40	41.39	43.88	5.7143	-42.1916	-44.7299
2012-12-14 11:18:40	41.44	43.94	5.72125	-42.2426	-44.791	2012-12-14 11:18:40
2012-12-14 11:28:40	41.49	43.99	5.72819	-42.2936	-44.842
2012-12-14 11:38:40	41.53	44.03	5.73514	-42.3344	-44.8828
2012-12-14 11:48:40	41.57	44.08	5.74208	-42.3751	-44.9337
2012-12-14 11:58:40	41.63	44.12	5.74902	-42.4363	-44.9745
2012-12-14 12:08:40	41.66	44.17	5.75597	-42.4669	-45.0255
2012-12-14 12:18:40	41.73	44.23	5.76291	-42.5382	-45.0866	2012-12-14 12:18:40
2012-12-14 12:28:40	41.78	44.29	5.76986	-42.5892	-45.1478
2012-12-14 12:38:40	41.79	44.3	5.7768	-42.5994	-45.158
2012-12-14 12:48:40	41.84	44.35	5.78375	-42.6504	-45.209
2012-12-14 12:58:40	41.9	44.41	5.79069	-42.7115	-45.2701
2012-12-14 13:08:40	41.98	44.48	5.79764	-42.7931	-45.3415
2012-12-14 13:18:40	42.02	44.51	5.80458	-42.8338	-45.3721	2012-12-14 13:18:40
2012-12-14 13:28:40	42.06	44.56	5.81152	-42.8746	-45.423
2012-12-14 13:38:40	42.11	44.6	5.81847	-42.9256	-45.4638
2012-12-14 13:48:40	42.17	44.67	5.82541	-42.9867	-45.5352
2012-12-14 13:58:40	42.19	44.69	5.83236	-43.0071	-45.5556
2012-12-14 14:08:40	42.25	44.73	5.8393	-43.0683	-45.5963
2012-12-14 14:18:40	42.31	44.82	5.84625	-43.1295	-45.6881	2012-12-14 14:18:40
2012-12-14 14:28:40	42.36	44.87	5.85319	-43.1804	-45.739
2012-12-14 14:38:40	42.39	44.9	5.86014	-43.211	-45.7696
2012-12-14 14:48:40	42.48	44.97	5.86708	-43.3028	-45.841
2012-12-14 14:58:40	42.53	45.03	5.87402	-43.3537	-45.9021
2012-12-14 15:08:40	42.6	45.07	5.88097	-43.4251	-45.9429
2012-12-14 15:18:40	42.67	45.15	5.88791	-43.4964	-46.0245	2012-12-14 15:18:40
2012-12-14 15:28:40	42.7	45.2	5.89486	-43.527	-46.0754
2012-12-14 15:38:40	42.75	45.25	5.9018	-43.578	-46.1264
2012-12-14 15:48:40	42.82	45.33	5.90875	-43.6493	-46.208
2012-12-14 15:58:40	42.92	45.29	5.91569	-43.7513	-46.1672
2012-12-14 16:08:40	42.97	45.47	5.92264	-43.8022	-46.3507
2012-12-14 16:18:40	42.83	45.33	5.92958	-43.6595	-46.208	2012-12-14 16:18:40
2012-12-14 16:28:40	43.01	45.5	5.93652	-43.843	-46.3812
2012-12-14 16:38:40	43.03	45.52	5.94347	-43.8634	-46.4016
2012-12-14 16:48:40	43.11	45.61	5.95041	-43.945	-46.4934
2012-12-14 16:58:40	43.17	45.67	5.95736	-44.0061	-46.5545
2012-12-14 17:08:40	43.27	45.78	5.9643	-44.1081	-46.6667
2012-12-14 17:18:40	43.34	45.83	5.97125	-44.1794	-46.7176	2012-12-14 17:18:40
2012-12-14 17:28:40	43.39	45.88	5.97819	-44.2304	-46.7686
2012-12-14 17:38:40	43.42	45.92	5.98514	-44.261	-46.8094
2012-12-14 17:48:40	43.49	45.99	5.99208	-44.3323	-46.8807
2012-12-14 17:58:40	43.53	46.03	5.99902	-44.3731	-46.9215
2012-12-14 18:08:40	43.57	46.06	6.00597	-44.4139	-46.9521
2012-12-14 18:18:40	43.66	46.15	6.01291	-44.5056	-47.0438	2012-12-14 18:18:40
2012-12-14 18:28:40	43.71	46.19	6.01986	-44.5566	-47.0846
2012-12-14 18:38:40	43.75	46.27	6.0268	-44.5973	-47.1662
2012-12-14 18:48:40	43.82	46.32	6.03375	-44.6687	-47.2171
2012-12-14 18:58:40	43.87	46.38	6.04069	-44.7197	-47.2783
2012-12-14 19:08:40	43.9	46.41	6.04764	-44.7503	-47.3089
2012-12-14 19:18:40	43.95	46.45	6.05458	-44.8012	-47.3496	2012-12-14 19:18:40
2012-12-14 19:28:40	43.99	46.49	6.06152	-44.842	-47.3904
2012-12-14 19:38:40	44.07	46.58	6.06847	-44.9235	-47.4822
2012-12-14 19:48:40	44	46.43	6.07541	-44.8522	-47.3293
2012-12-14 19:58:40	43.86	46.25	6.08236	-44.7095	-47.1458
2012-12-14 20:08:40	43.88	46.26	6.0893	-44.7299	-47.156
2012-12-14 20:18:40	44.05	46.46	6.09625	-44.9032	-47.3598	2012-12-14 20:18:40
2012-12-14 20:28:40	44.11	46.51	6.10319	-44.9643	-47.4108
2012-12-14 20:38:40	44.19	46.59	6.11014	-45.0459	-47.4924
2012-12-14 20:48:40	44.3	46.71	6.11708	-45.158	-47.6147
2012-12-14 20:58:40	44.4	46.81	6.12402	-45.2599	-47.7166
2012-12-14 21:08:40	44.49	46.88	6.13097	-45.3517	-47.788
2012-12-14 21:18:40	44.56	46.96	6.13791	-45.423	-47.8695	2012-12-14 21:18:40
2012-12-14 21:28:40	44.66	47.07	6.14486	-45.525	-47.9817
2012-12-14 21:38:40	44.77	47.16	6.1518	-45.6371	-48.0734
2012-12-14 21:48:40	44.84	47.25	6.15875	-45.7085	-48.1651
2012-12-14 21:58:40	44.92	47.27	6.16569	-45.79	-48.1855
2012-12-14 22:08:40	44.97	47.37	6.17264	-45.841	-48.2875
2012-12-14 22:18:40	45.06	47.47	6.17958	-45.9327	-48.3894	2012-12-14 22:18:40
2012-12-14 22:28:40	45.1	47.51	6.18652	-45.9735	-48.4302
2012-12-14 22:38:40	45.21	47.62	6.19347	-46.0856	-48.5423
2012-12-14 22:48:40	45.29	47.68	6.20041	-46.1672	-48.6035
2012-12-14 22:58:40	45.35	47.76	6.20736	-46.2283	-48.685
2012-12-14 23:08:40	45.4	47.81	6.2143	-46.2793	-48.736
2012-12-14 23:18:40	45.49	47.91	6.22125	-46.371	-48.8379	2012-12-14 23:18:40
2012-12-14 23:28:40	45.59	48.01	6.22819	-46.473	-48.9399
2012-12-14 23:38:40	45.66	48.08	6.23514	-46.5443	-49.0112
2012-12-14 23:48:40	45.72	48.14	6.24208	-46.6055	-49.0724
2012-12-14 23:58:40	45.8	48.23	6.24902	-46.6871	-49.1641
2012-12-15 00:08:40	45.8	48.25	6.25597	-46.6871	-49.1845
2012-12-15 00:18:40	45.88	48.3	6.26291	-46.7686	-49.2355	2012-12-15 00:18:40
2012-12-15 00:28:40	45.96	48.39	6.26986	-46.8502	-49.3272
2012-12-15 00:38:40	46.05	48.44	6.2768	-46.9419	-49.3782
2012-12-15 00:48:40	46.05	48.46	6.28375	-46.9419	-49.3986
2012-12-15 00:58:40	46.12	48.54	6.29069	-47.0133	-49.4801
2012-12-15 01:08:40	46.23	48.66	6.29764	-47.1254	-49.6024
2012-12-15 01:18:40	46.29	48.72	6.30458	-47.1865	-49.6636	2012-12-15 01:18:40
2012-12-15 01:28:40	46.35	48.77	6.31152	-47.2477	-49.7146
2012-12-15 01:38:40	46.43	48.85	6.31847	-47.3293	-49.7961
2012-12-15 01:48:40	46.52	48.95	6.32541	-47.421	-49.8981
2012-12-15 01:58:40	46.56	48.99	6.33236	-47.4618	-49.9388
2012-12-15 02:08:40	46.6	49.04	6.3393	-47.5025	-49.9898
2012-12-15 02:18:40	46.68	49.09	6.34625	-47.5841	-50.0408	2012-12-15 02:18:40
2012-12-15 02:28:40	46.75	49.19	6.35319	-47.6555	-50.1427
2012-12-15 02:38:40	46.82	49.25	6.36014	-47.7268	-50.2039
2012-12-15 02:48:40	46.89	49.32	6.36708	-47.7982	-50.2752
2012-12-15 02:58:40	46.98	49.39	6.37402	-47.8899	-50.3466
2012-12-15 03:08:40	47.05	49.45	6.38097	-47.9613	-50.4077
2012-12-15 03:18:40	47.08	49.51	6.38791	-47.9918	-50.4689	2012-12-15 03:18:40
2012-12-15 03:28:40	47.17	49.6	6.39486	-48.0836	-50.5607
2012-12-15 03:38:40	47.19	49.63	6.4018	-48.104	-50.5912
2012-12-15 03:48:40	47.27	49.73	6.40875	-48.1855	-50.6932
2012-12-15 03:58:40	47.33	49.77	6.41569	-48.2467	-50.7339
2012-12-15 04:08:40	47.37	49.79	6.42264	-48.2875	-50.7543
2012-12-15 04:18:40	47.45	49.89	6.42958	-48.369	-50.8563	2012-12-15 04:18:40
2012-12-15 04:28:40	47.52	49.97	6.43652	-48.4404	-50.9378
2012-12-15 04:38:40	47.58	50.02	6.44347	-48.5015	-50.9888
2012-12-15 04:48:40	47.66	50.11	6.45041	-48.5831	-51.0805
2012-12-15 04:58:40	47.75	50.16	6.45736	-48.6748	-51.1315
2012-12-15 05:08:40	47.78	50.2	6.4643	-48.7054	-51.1723
2012-12-15 05:18:40	47.85	50.3	6.47125	-48.7768	-51.2742	2012-12-15 05:18:40
2012-12-15 05:28:40	47.86	50.31	6.47819	-48.787	-51.2844
2012-12-15 05:38:40	47.95	50.39	6.48514	-48.8787	-51.366
2012-12-15 05:48:40	47.99	50.45	6.49208	-48.9195	-51.4271
2012-12-15 05:58:40	48.07	50.52	6.49902	-49.001	-51.4985
2012-12-15 06:08:40	48.12	50.57	6.50597	-49.052	-51.5494
2012-12-15 06:18:40	48.18	50.63	6.51291	-49.1131	-51.6106	2012-12-15 06:18:40
2012-12-15 06:28:40	48.24	50.69	6.51986	-49.1743	-51.6718
2012-12-15 06:38:40	48.26	50.71	6.5268	-49.1947	-51.6922
2012-12-15 06:48:40	48.34	50.79	6.53375	-49.2762	-51.7737
2012-12-15 06:58:40	48.42	50.88	6.54069	-49.3578	-51.8654
2012-12-15 07:08:40	48.47	50.93	6.54764	-49.4088	-51.9164
2012-12-15 07:18:40	48.55	51	6.55458	-49.4903	-51.9878	2012-12-15 07:18:40
2012-12-15 07:28:40	48.62	51.07	6.56152	-49.5617	-52.0591
2012-12-15 07:38:40	48.66	51.11	6.56847	-49.6024	-52.0999
2012-12-15 07:48:40	48.75	51.17	6.57541	-49.6942	-52.1611
2012-12-15 07:58:40	48.81	51.24	6.58236	-49.7554	-52.2324
2012-12-15 08:08:40	48.86	51.28	6.5893	-49.8063	-52.2732
2012-12-15 08:18:40	48.88	51.34	6.59625	-49.8267	-52.3344	2012-12-15 08:18:40
2012-12-15 08:28:40	48.95	51.4	6.60319	-49.8981	-52.3955
2012-12-15 08:38:40	49.02	51.48	6.61014	-49.9694	-52.4771
2012-12-15 08:48:40	49.08	51.52	6.61708	-50.0306	-52.5178
2012-12-15 08:58:40	49.16	51.58	6.62402	-50.1121	-52.579
2012-12-15 09:08:40	49.21	51.66	6.63097	-50.1631	-52.6606
2012-12-15 09:18:40	49.28	51.74	6.63791	-50.2345	-52.7421	2012-12-15 09:18:40
2012-12-15 09:28:40	49.35	51.8	6.64486	-50.3058	-52.8033
2012-12-15 09:38:40	49.41	51.86	6.6518	-50.367	-52.8644
2012-12-15 09:48:40	49.49	51.95	6.65875	-50.4485	-52.9562
2012-12-15 09:58:40	49.55	52.01	6.66569	-50.5097	-53.0173
2012-12-15 10:08:40	49.6	52.03	6.67264	-50.5607	-53.0377
2012-12-15 10:18:40	49.67	52.1	6.67958	-50.632	-53.1091	2012-12-15 10:18:40
2012-12-15 10:28:40	49.74	52.19	6.68652	-50.7034	-53.2008
2012-12-15 10:38:40	49.79	52.24	6.69347	-50.7543	-53.2518
2012-12-15 10:48:40	49.81	52.26	6.70041	-50.7747	-53.2722
2012-12-15 10:58:40	49.89	52.34	6.70736	-50.8563	-53.3537
2012-12-15 11:08:40	49.96	52.39	6.7143	-50.9276	-53.4047
2012-12-15 11:18:40	49.98	52.43	6.72125	-50.948	-53.4455	2012-12-15 11:18:40
2012-12-15 11:28:40	50.04	52.49	6.72819	-51.0092	-53.5066
2012-12-15 11:38:40	50.09	52.55	6.73514	-51.0601	-53.5678
2012-12-15 11:48:40	49.67	52.25	6.74208	-50.632	-53.262
2012-12-15 11:58:40	49.94	52.34	6.74902	-50.9072	-53.3537
2012-12-15 12:08:40	50.05	52.5	6.75597	-51.0194	-53.5168
2012-12-15 12:18:40	50.18	52.63	6.76291	-51.1519	-53.6493	2012-12-15 12:18:40
2012-12-15 12:28:40	50.26	52.7	6.76986	-51.2334	-53.7207
2012-12-15 12:38:40	50.34	52.8	6.7768	-51.315	-53.8226
2012-12-15 12:48:40	50.41	52.85	6.78375	-51.3863	-53.8736
2012-12-15 12:58:40	50.47	52.91	6.79069	-51.4475	-53.9348
2012-12-15 13:08:40	50.54	52.97	6.79764	-51.5189	-53.9959
2012-12-15 13:18:40	50.61	53.06	6.80458	-51.5902	-54.0877	2012-12-15 13:18:40
2012-12-15 13:28:40	50.66	53.1	6.81152	-51.6412	-54.1284
2012-12-15 13:38:40	50.72	53.15	6.81847	-51.7023	-54.1794
2012-12-15 13:48:40	50.77	53.2	6.82541	-51.7533	-54.2304
2012-12-15 13:58:40	50.84	53.28	6.83236	-51.8247	-54.3119
2012-12-15 14:08:40	50.94	53.37	6.8393	-51.9266	-54.4037
2012-12-15 14:18:40	51.01	53.45	6.84625	-51.998	-54.4852	2012-12-15 14:18:40
2012-12-15 14:28:40	51.01	53.55	6.85319	-51.998	-54.5872
2012-12-15 14:38:40	51.14	53.59	6.86014	-52.1305	-54.6279
2012-12-15 14:48:40	51.19	53.66	6.86708	-52.1814	-54.6993
2012-12-15 14:58:40	51.29	53.74	6.87402	-52.2834	-54.7808
2012-12-15 15:08:40	51.36	53.81	6.88097	-52.3547	-54.8522
2012-12-15 15:18:40	51.44	53.87	6.88791	-52.4363	-54.9134	2012-12-15 15:18:40
2012-12-15 15:28:40	51.51	53.96	6.89486	-52.5076	-55.0051
2012-12-15 15:38:40	51.6	54.05	6.9018	-52.5994	-55.0968
2012-12-15 15:48:40	51.64	54.09	6.90875	-52.6402	-55.1376
2012-12-15 15:58:40	51.74	54.18	6.91569	-52.7421	-55.2294
2012-12-15 16:08:40	51.81	54.26	6.92264	-52.8135	-55.3109
2012-12-15 16:18:40	51.91	54.35	6.92958	-52.9154	-55.4027	2012-12-15 16:18:40
2012-12-15 16:28:40	52	54.44	6.93652	-53.0071	-55.4944
2012-12-15 16:38:40	52.06	54.51	6.94347	-53.0683	-55.5657
2012-12-15 16:48:40	52.14	54.57	6.95041	-53.1498	-55.6269
2012-12-15 16:58:40	52.19	54.65	6.95736	-53.2008	-55.7085
2012-12-15 17:08:40	52.27	54.72	6.9643	-53.2824	-55.7798
2012-12-15 17:18:40	52.34	54.8	6.97125	-53.3537	-55.8614	2012-12-15 17:18:40
2012-12-15 17:28:40	52.44	54.88	6.97819	-53.4557	-55.9429
2012-12-15 17:38:40	52.5	54.95	6.98514	-53.5168	-56.0143
2012-12-15 17:48:40	52.56	55	6.99208	-53.578	-56.0652
2012-12-15 17:58:40	52.63	55.09	6.99902	-53.6493	-56.157
2012-12-15 18:08:40	52.72	55.18	7.00597	-53.7411	-56.2487
2012-12-15 18:18:40	52.8	55.26	7.01291	-53.8226	-56.3303	2012-12-15 18:18:40
2012-12-15 18:28:40	52.9	55.35	7.01986	-53.9246	-56.422
2012-12-15 18:38:40	52.98	55.41	7.0268	-54.0061	-56.4832
2012-12-15 18:48:40	53.04	55.47	7.03375	-54.0673	-56.5443
2012-12-15 18:58:40	53.1	55.54	7.04069	-54.1284	-56.6157
2012-12-15 19:08:40	53.18	55.62	7.04764	-54.21	-56.6972
2012-12-15 19:18:40	53.3	55.75	7.05458	-54.3323	-56.8298	2012-12-15 19:18:40
2012-12-15 19:28:40	53.35	55.82	7.06152	-54.3833	-56.9011
2012-12-15 19:38:40	53.43	55.87	7.06847	-54.4648	-56.9521
2012-12-15 19:48:40	53.54	55.99	7.07541	-54.577	-57.0744
2012-12-15 19:58:40	53.58	56.05	7.08236	-54.6177	-57.1356
2012-12-15 20:08:40	53.64	56.11	7.0893	-54.6789	-57.1967
2012-12-15 20:18:40	53.75	56.17	7.09625	-54.791	-57.2579	2012-12-15 20:18:40
2012-12-15 20:28:40	53.82	56.27	7.10319	-54.8624	-57.3598
2012-12-15 20:38:40	53.9	56.36	7.11014	-54.9439	-57.4516
2012-12-15 20:48:40	54	56.42	7.11708	-55.0459	-57.5127
2012-12-15 20:58:40	54.05	56.51	7.12402	-55.0968	-57.6045
2012-12-15 21:08:40	54.14	56.6	7.13097	-55.1886	-57.6962
2012-12-15 21:18:40	54.21	56.65	7.13791	-55.2599	-57.7472	2012-12-15 21:18:40
2012-12-15 21:28:40	54.3	56.75	7.14486	-55.3517	-57.8491
2012-12-15 21:38:40	54.4	56.82	7.1518	-55.4536	-57.9205
2012-12-15 21:48:40	54.49	56.95	7.15875	-55.5454	-58.053
2012-12-15 21:58:40	54.57	57.03	7.16569	-55.6269	-58.1346
2012-12-15 22:08:40	54.67	57.12	7.17264	-55.7288	-58.2263
2012-12-15 22:18:40	54.76	57.22	7.17958	-55.8206	-58.3282	2012-12-15 22:18:40
2012-12-15 22:28:40	54.84	57.3	7.18652	-55.9021	-58.4098
2012-12-15 22:38:40	54.92	57.38	7.19347	-55.9837	-58.4913
2012-12-15 22:48:40	54.99	57.44	7.20041	-56.055	-58.5525
2012-12-15 22:58:40	55.11	57.55	7.20736	-56.1774	-58.6646
2012-12-15 23:08:40	55.18	57.63	7.2143	-56.2487	-58.7462
2012-12-15 23:18:40	55.25	57.72	7.22125	-56.3201	-58.8379	2012-12-15 23:18:40
2012-12-15 23:28:40	55.34	57.8	7.22819	-56.4118	-58.9195
2012-12-15 23:38:40	55.45	57.91	7.23514	-56.524	-59.0316
2012-12-15 23:48:40	55.55	58	7.24208	-56.6259	-59.1233
2012-12-15 23:58:40	55.6	58.07	7.24902	-56.6769	-59.1947
2012-12-16 00:08:40	55.71	58.17	7.25597	-56.789	-59.2966
2012-12-16 00:18:40	55.78	58.25	7.26291	-56.8603	-59.3782	2012-12-16 00:18:40
2012-12-16 00:28:40	55.86	58.32	7.26986	-56.9419	-59.4495
2012-12-16 00:38:40	55.95	58.4	7.2768	-57.0336	-59.5311
2012-12-16 00:48:40	56.04	58.5	7.28375	-57.1254	-59.633
2012-12-16 00:58:40	56.1	58.57	7.29069	-57.1865	-59.7044
2012-12-16 01:08:40	56.23	58.69	7.29764	-57.3191	-59.8267
2012-12-16 01:18:40	56.32	58.79	7.30458	-57.4108	-59.9286	2012-12-16 01:18:40
2012-12-16 01:28:40	56.43	58.89	7.31152	-57.5229	-60.0306
2012-12-16 01:38:40	56.52	58.99	7.31847	-57.6147	-60.1325
2012-12-16 01:48:40	56.58	58.96	7.32541	-57.6758	-60.1019
2012-12-16 01:58:40	56.63	59.11	7.33236	-57.7268	-60.2548
2012-12-16 02:08:40	56.72	59.2	7.3393	-57.8186	-60.3466
2012-12-16 02:18:40	56.83	59.3	7.34625	-57.9307	-60.4485	2012-12-16 02:18:40
2012-12-16 02:28:40	56.91	59.39	7.35319	-58.0122	-60.5403
2012-12-16 02:38:40	57.01	59.47	7.36014	-58.1142	-60.6218
2012-12-16 02:48:40	57.11	59.58	7.36708	-58.2161	-60.7339
2012-12-16 02:58:40	57.19	59.66	7.37402	-58.2977	-60.8155
2012-12-16 03:08:40	57.28	59.75	7.38097	-58.3894	-60.9072
2012-12-16 03:18:40	57.37	59.85	7.38791	-58.4811	-61.0092	2012-12-16 03:18:40
2012-12-16 03:28:40	57.46	59.92	7.39486	-58.5729	-61.0805
2012-12-16 03:38:40	57.57	60.02	7.4018	-58.685	-61.1825
2012-12-16 03:48:40	57.63	60.1	7.40875	-58.7462	-61.264
2012-12-16 03:58:40	57.73	60.22	7.41569	-58.8481	-61.3863
2012-12-16 04:08:40	57.85	60.32	7.42264	-58.9704	-61.4883
2012-12-16 04:18:40	57.96	60.41	7.42958	-59.0826	-61.58	2012-12-16 04:18:40
2012-12-16 04:28:40	58.03	60.51	7.43652	-59.1539	-61.682
2012-12-16 04:38:40	58.1	60.6	7.44347	-59.2253	-61.7737
2012-12-16 04:48:40	58.23	60.7	7.45041	-59.3578	-61.8756
2012-12-16 04:58:40	58.33	60.82	7.45736	-59.4597	-61.998
2012-12-16 05:08:40	58.43	60.91	7.4643	-59.5617	-62.0897
2012-12-16 05:18:40	58.56	61.01	7.47125	-59.6942	-62.1916	2012-12-16 05:18:40
2012-12-16 05:28:40	58.64	61.11	7.47819	-59.7757	-62.2936
2012-12-16 05:38:40	58.73	61.18	7.48514	-59.8675	-62.3649
2012-12-16 05:48:40	58.81	61.27	7.49208	-59.949	-62.4567
2012-12-16 05:58:40	58.91	61.39	7.49902	-60.051	-62.579
2012-12-16 06:08:40	58.98	61.47	7.50597	-60.1223	-62.6606
2012-12-16 06:18:40	59.09	61.56	7.51291	-60.2345	-62.7523	2012-12-16 06:18:40
2012-12-16 06:28:40	59.2	61.68	7.51986	-60.3466	-62.8746
2012-12-16 06:38:40	59.27	61.75	7.5268	-60.4179	-62.946
2012-12-16 06:48:40	59.34	61.82	7.53375	-60.4893	-63.0173
2012-12-16 06:58:40	59.43	61.93	7.54069	-60.581	-63.1295
2012-12-16 07:08:40	59.56	62.02	7.54764	-60.7136	-63.2212
2012-12-16 07:18:40	59.66	62.15	7.55458	-60.8155	-63.3537	2012-12-16 07:18:40
2012-12-16 07:28:40	59.71	62.21	7.56152	-60.8665	-63.4149
2012-12-16 07:38:40	59.83	62.32	7.56847	-60.9888	-63.527
2012-12-16 07:48:40	59.91	62.39	7.57541	-61.0703	-63.5984
2012-12-16 07:58:40	60.01	62.48	7.58236	-61.1723	-63.6901
2012-12-16 08:08:40	60.11	62.6	7.5893	-61.2742	-63.8124
2012-12-16 08:18:40	60.23	62.7	7.59625	-61.3965	-63.9144	2012-12-16 08:18:40
2012-12-16 08:28:40	60.29	62.78	7.60319	-61.4577	-63.9959
2012-12-16 08:38:40	60.42	62.89	7.61014	-61.5902	-64.1081
2012-12-16 08:48:40	60.52	63.01	7.61708	-61.6922	-64.2304
2012-12-16 08:58:40	60.6	63.09	7.62402	-61.7737	-64.3119
2012-12-16 09:08:40	60.71	63.21	7.63097	-61.8858	-64.4343
2012-12-16 09:18:40	60.79	63.3	7.63791	-61.9674	-64.526	2012-12-16 09:18:40
2012-12-16 09:28:40	60.9	63.37	7.64486	-62.0795	-64.5973
2012-12-16 09:38:40	61.01	63.52	7.6518	-62.1916	-64.7503
2012-12-16 09:48:40	61.13	63.62	7.65875	-62.314	-64.8522
2012-12-16 09:58:40	61.21	63.71	7.66569	-62.3955	-64.9439
2012-12-16 10:08:40	61.29	63.78	7.67264	-62.4771	-65.0153
2012-12-16 10:18:40	61.37	63.87	7.67958	-62.5586	-65.107	2012-12-16 10:18:40
2012-12-16 10:28:40	61.45	63.95	7.68652	-62.6402	-65.1886
2012-12-16 10:38:40	61.56	64.04	7.69347	-62.7523	-65.2803
2012-12-16 10:48:40	61.66	64.18	7.70041	-62.8542	-65.423
2012-12-16 10:58:40	61.73	64.25	7.70736	-62.9256	-65.4944
2012-12-16 11:08:40	61.84	64.34	7.7143	-63.0377	-65.5861
2012-12-16 11:18:40	61.95	64.45	7.72125	-63.1498	-65.6983	2012-12-16 11:18:40
2012-12-16 11:28:40	62.06	64.53	7.72819	-63.262	-65.7798
2012-12-16 11:38:40	62.15	64.66	7.73514	-63.3537	-65.9123
2012-12-16 11:48:40	62.3	64.8	7.74208	-63.5066	-66.055
2012-12-16 11:58:40	62.39	64.88	7.74902	-63.5984	-66.1366
2012-12-16 12:08:40	62.46	64.97	7.75597	-63.6697	-66.2283
2012-12-16 12:18:40	62.52	65.08	7.76291	-63.7309	-66.3405	2012-12-16 12:18:40
2012-12-16 12:28:40	62.68	65.19	7.76986	-63.894	-66.4526
2012-12-16 12:38:40	62.78	65.28	7.7768	-63.9959	-66.5443
2012-12-16 12:48:40	62.85	65.39	7.78375	-64.0673	-66.6565
2012-12-16 12:58:40	63	65.5	7.79069	-64.2202	-66.7686
2012-12-16 13:08:40	63.11	65.62	7.79764	-64.3323	-66.8909
2012-12-16 13:18:40	63.2	65.71	7.80458	-64.4241	-66.9827	2012-12-16 13:18:40
2012-12-16 13:28:40	63.32	65.81	7.81152	-64.5464	-67.0846
2012-12-16 13:38:40	63.42	65.93	7.81847	-64.6483	-67.2069
2012-12-16 13:48:40	63.5	66	7.82541	-64.7299	-67.2783
2012-12-16 13:58:40	63.6	66.1	7.83236	-64.8318	-67.3802
2012-12-16 14:08:40	63.68	66.19	7.8393	-64.9134	-67.472
2012-12-16 14:18:40	63.8	66.31	7.84625	-65.0357	-67.5943	2012-12-16 14:18:40
2012-12-16 14:28:40	63.92	66.44	7.85319	-65.158	-67.7268
2012-12-16 14:38:40	64.06	66.59	7.86014	-65.3007	-67.8797
2012-12-16 14:48:40	63.67	66.13	7.86708	-64.9032	-67.4108
2012-12-16 14:58:40	63.96	66.47	7.87402	-65.1988	-67.7574
2012-12-16 15:08:40	64.12	66.64	7.88097	-65.3619	-67.9307
2012-12-16 15:18:40	64.26	66.76	7.88791	-65.5046	-68.053	2012-12-16 15:18:40
2012-12-16 15:28:40	64.37	66.88	7.89486	-65.6167	-68.1753
2012-12-16 15:38:40	64.49	67.02	7.9018	-65.739	-68.318
2012-12-16 15:48:40	64.63	67.14	7.90875	-65.8818	-68.4404
2012-12-16 15:58:40	64.74	67.27	7.91569	-65.9939	-68.5729
2012-12-16 16:08:40	64.86	67.4	7.92264	-66.1162	-68.7054
2012-12-16 16:18:40	65.03	67.53	7.92958	-66.2895	-68.8379	2012-12-16 16:18:40
2012-12-16 16:28:40	65.12	67.64	7.93652	-66.3812	-68.9501
2012-12-16 16:38:40	65.26	67.76	7.94347	-66.524	-69.0724
2012-12-16 16:48:40	65.38	67.9	7.95041	-66.6463	-69.2151
2012-12-16 16:58:40	65.53	68.03	7.95736	-66.7992	-69.3476
2012-12-16 17:08:40	65.64	68.16	7.9643	-66.9113	-69.4801
2012-12-16 17:18:40	65.76	68.24	7.97125	-67.0336	-69.5617	2012-12-16 17:18:40
2012-12-16 17:28:40	65.88	68.39	7.97819	-67.156	-69.7146
2012-12-16 17:38:40	66.03	68.54	7.98514	-67.3089	-69.8675
2012-12-16 17:48:40	66.18	68.68	7.99208	-67.4618	-70.0102
2012-12-16 17:58:40	66.29	68.83	7.99902	-67.5739	-70.1631
2012-12-16 18:08:40	66.43	68.96	8.00597	-67.7166	-70.2956
2012-12-16 18:18:40	66.55	69.07	8.01291	-67.8389	-70.4077	2012-12-16 18:18:40
2012-12-16 18:28:40	66.7	69.19	8.01986	-67.9918	-70.5301
2012-12-16 18:38:40	66.81	69.31	8.0268	-68.104	-70.6524
2012-12-16 18:48:40	66.9	69.44	8.03375	-68.1957	-70.7849
2012-12-16 18:58:40	67.02	69.55	8.04069	-68.318	-70.897
2012-12-16 19:08:40	67.15	69.67	8.04764	-68.4506	-71.0194
2012-12-16 19:18:40	67.31	69.81	8.05458	-68.6137	-71.1621	2012-12-16 19:18:40
2012-12-16 19:28:40	67.4	69.93	8.06152	-68.7054	-71.2844
2012-12-16 19:38:40	67.54	70.06	8.06847	-68.8481	-71.4169
2012-12-16 19:48:40	67.7	70.22	8.07541	-69.0112	-71.58
2012-12-16 19:58:40	67.79	70.32	8.08236	-69.103	-71.682
2012-12-16 20:08:40	67.9	70.41	8.0893	-69.2151	-71.7737
2012-12-16 20:18:40	68.06	70.58	8.09625	-69.3782	-71.947	2012-12-16 20:18:40
2012-12-16 20:28:40	68.19	70.72	8.10319	-69.5107	-72.0897
2012-12-16 20:38:40	68.33	70.86	8.11014	-69.6534	-72.2324
2012-12-16 20:48:40	68.43	70.97	8.11708	-69.7554	-72.3445
2012-12-16 20:58:40	68.55	71.1	8.12402	-69.8777	-72.4771
2012-12-16 21:08:40	68.7	71.24	8.13097	-70.0306	-72.6198
2012-12-16 21:18:40	68.83	71.34	8.13791	-70.1631	-72.7217	2012-12-16 21:18:40
2012-12-16 21:28:40	68.97	71.48	8.14486	-70.3058	-72.8644
2012-12-16 21:38:40	69.1	71.63	8.1518	-70.4383	-73.0173
2012-12-16 21:48:40	69.24	71.78	8.15875	-70.581	-73.1702
2012-12-16 21:58:40	69.35	71.91	8.16569	-70.6932	-73.3028
2012-12-16 22:08:40	69.53	72.06	8.17264	-70.8767	-73.4557
2012-12-16 22:18:40	69.61	72.19	8.17958	-70.9582	-73.5882	2012-12-16 22:18:40
2012-12-16 22:28:40	69.77	72.3	8.18652	-71.1213	-73.7003
2012-12-16 22:38:40	69.92	72.47	8.19347	-71.2742	-73.8736
2012-12-16 22:48:40	70.06	72.61	8.20041	-71.4169	-74.0163
2012-12-16 22:58:40	70.18	72.73	8.20736	-71.5392	-74.1386
2012-12-16 23:08:40	70.3	72.85	8.2143	-71.6616	-74.261
2012-12-16 23:18:40	70.43	72.96	8.22125	-71.7941	-74.3731	2012-12-16 23:18:40
2012-12-16 23:28:40	70.59	73.14	8.22819	-71.9572	-74.5566
2012-12-16 23:38:40	70.71	73.24	8.23514	-72.0795	-74.6585
2012-12-16 23:48:40	70.85	73.38	8.24208	-72.2222	-74.8012
2012-12-16 23:58:40	70.98	73.53	8.24902	-72.3547	-74.9541
2012-12-17 00:08:40	71.13	73.69	8.25597	-72.5076	-75.1172
2012-12-17 00:18:40	71.26	73.83	8.26291	-72.6402	-75.2599	2012-12-17 00:18:40
2012-12-17 00:28:40	71.42	73.96	8.26986	-72.8033	-75.3925
2012-12-17 00:38:40	71.55	74.11	8.2768	-72.9358	-75.5454
2012-12-17 00:48:40	71.69	74.26	8.28375	-73.0785	-75.6983
2012-12-17 00:58:40	71.77	74.38	8.29069	-73.16	-75.8206
2012-12-17 01:08:40	71.96	74.53	8.29764	-73.3537	-75.9735
2012-12-17 01:18:40	72.11	74.68	8.30458	-73.5066	-76.1264	2012-12-17 01:18:40
2012-12-17 01:28:40	72.26	74.83	8.31152	-73.6595	-76.2793
2012-12-17 01:38:40	72.41	74.99	8.31847	-73.8124	-76.4424
2012-12-17 01:48:40	72.56	75.13	8.32541	-73.9653	-76.5851
2012-12-17 01:58:40	72.69	75.26	8.33236	-74.0979	-76.7176
2012-12-17 02:08:40	72.82	75.38	8.3393	-74.2304	-76.84
2012-12-17 02:18:40	72.98	75.55	8.34625	-74.3935	-77.0133	2012-12-17 02:18:40
2012-12-17 02:28:40	73.14	75.71	8.35319	-74.5566	-77.1764
2012-12-17 02:38:40	73.28	75.86	8.36014	-74.6993	-77.3293
2012-12-17 02:48:40	73.41	75.97	8.36708	-74.8318	-77.4414
2012-12-17 02:58:40	73.54	76.11	8.37402	-74.9643	-77.5841
2012-12-17 03:08:40	73.69	76.26	8.38097	-75.1172	-77.737
2012-12-17 03:18:40	73.85	76.44	8.38791	-75.2803	-77.9205	2012-12-17 03:18:40
2012-12-17 03:28:40	74.02	76.61	8.39486	-75.4536	-78.0938
2012-12-17 03:38:40	74.17	76.76	8.4018	-75.6065	-78.2467
2012-12-17 03:48:40	74.29	76.87	8.40875	-75.7288	-78.3588
2012-12-17 03:58:40	74.42	76.99	8.41569	-75.8614	-78.4811
2012-12-17 04:08:40	74.59	77.19	8.42264	-76.0347	-78.685
2012-12-17 04:18:40	74.74	77.32	8.42958	-76.1876	-78.8175	2012-12-17 04:18:40
2012-12-17 04:28:40	74.9	77.47	8.43652	-76.3507	-78.9704
2012-12-17 04:38:40	75.04	77.63	8.44347	-76.4934	-79.1335
2012-12-17 04:48:40	75.16	77.77	8.45041	-76.6157	-79.2762
2012-12-17 04:58:40	75.3	77.92	8.45736	-76.7584	-79.4292
2012-12-17 05:08:40	75.46	78.07	8.4643	-76.9215	-79.5821
2012-12-17 05:18:40	75.58	78.2	8.47125	-77.0438	-79.7146	2012-12-17 05:18:40
2012-12-17 05:28:40	75.76	78.37	8.47819	-77.2273	-79.8879
2012-12-17 05:38:40	75.9	78.5	8.48514	-77.37	-80.0204
2012-12-17 05:48:40	76.02	78.65	8.49208	-77.4924	-80.1733
2012-12-17 05:58:40	76.19	78.79	8.49902	-77.6656	-80.316
2012-12-17 06:08:40	76.34	78.97	8.50597	-77.8186	-80.4995
2012-12-17 06:18:40	76.49	79.13	8.51291	-77.9715	-80.6626	2012-12-17 06:18:40
2012-12-17 06:28:40	76.67	79.24	8.51986	-78.1549	-80.7747
2012-12-17 06:38:40	76.82	79.46	8.5268	-78.3078	-80.999
2012-12-17 06:48:40	77	79.63	8.53375	-78.4913	-81.1723
2012-12-17 06:58:40	77.16	79.78	8.54069	-78.6544	-81.3252
2012-12-17 07:08:40	77.31	79.95	8.54764	-78.8073	-81.4985
2012-12-17 07:18:40	77.47	80.1	8.55458	-78.9704	-81.6514	2012-12-17 07:18:40
2012-12-17 07:28:40	77.65	80.26	8.56152	-79.1539	-81.8145
2012-12-17 07:38:40	77.78	80.44	8.56847	-79.2864	-81.998
2012-12-17 07:48:40	77.98	80.6	8.57541	-79.4903	-82.1611
2012-12-17 07:58:40	78.16	80.8	8.58236	-79.6738	-82.3649
2012-12-17 08:08:40	78.33	80.96	8.5893	-79.8471	-82.528
2012-12-17 08:18:40	78.5	81.17	8.59625	-80.0204	-82.7421	2012-12-17 08:18:40
2012-12-17 08:28:40	78.7	81.32	8.60319	-80.2243	-82.895
2012-12-17 08:38:40	78.87	81.53	8.61014	-80.3976	-83.1091
2012-12-17 08:48:40	79.04	81.71	8.61708	-80.5708	-83.2926
2012-12-17 08:58:40	79.18	81.86	8.62402	-80.7136	-83.4455
2012-12-17 09:08:40	79.34	82.01	8.63097	-80.8767	-83.5984
2012-12-17 09:18:40	79.51	82.16	8.63791	-81.0499	-83.7513	2012-12-17 09:18:40
2012-12-17 09:28:40	79.65	82.29	8.64486	-81.1927	-83.8838
2012-12-17 09:38:40	79.84	82.5	8.6518	-81.3863	-84.0979
2012-12-17 09:48:40	79.98	82.66	8.65875	-81.5291	-84.261
2012-12-17 09:58:40	80.12	82.78	8.66569	-81.6718	-84.3833
2012-12-17 10:08:40	80.31	83.02	8.67264	-81.8654	-84.6279
2012-12-17 10:18:40	80.5	83.23	8.67958	-82.0591	-84.842	2012-12-17 10:18:40
2012-12-17 10:28:40	80.69	83.36	8.68652	-82.2528	-84.9745
2012-12-17 10:38:40	80.89	83.59	8.69347	-82.4567	-85.209
2012-12-17 10:48:40	81.02	83.71	8.70041	-82.5892	-85.3313
2012-12-17 10:58:40	81.19	83.91	8.70736	-82.7625	-85.5352
2012-12-17 11:08:40	81.36	84.08	8.7143	-82.9358	-85.7085
2012-12-17 11:18:40	81.08	83.8	8.72125	-82.6504	-85.423	2012-12-17 11:18:40
2012-12-17 11:28:40	81.43	84.07	8.72819	-83.0071	-85.6983
2012-12-17 11:38:40	81.61	84.25	8.73514	-83.1906	-85.8818
2012-12-17 11:48:40	81.82	84.46	8.74208	-83.4047	-86.0958
2012-12-17 11:58:40	82.01	84.65	8.74902	-83.5984	-86.2895
2012-12-17 12:08:40	82.23	84.87	8.75597	-83.8226	-86.5138
2012-12-17 12:18:40	82.38	85.03	8.76291	-83.9755	-86.6769	2012-12-17 12:18:40
2012-12-17 12:28:40	82.59	85.23	8.76986	-84.1896	-86.8807
2012-12-17 12:38:40	82.76	85.39	8.7768	-84.3629	-87.0438
2012-12-17 12:48:40	82.95	85.6	8.78375	-84.5566	-87.2579
2012-12-17 12:58:40	83.16	85.78	8.79069	-84.7706	-87.4414
2012-12-17 13:08:40	83.36	86	8.79764	-84.9745	-87.6656
2012-12-17 13:18:40	83.57	86.22	8.80458	-85.1886	-87.8899	2012-12-17 13:18:40
2012-12-17 13:28:40	83.75	86.4	8.81152	-85.3721	-88.0734
2012-12-17 13:38:40	83.92	86.57	8.81847	-85.5454	-88.2467
2012-12-17 13:48:40	84.09	86.62	8.82541	-85.7187	-88.2977
2012-12-17 13:58:40	84.31	86.97	8.83236	-85.9429	-88.6544
2012-12-17 14:08:40	84.52	87.2	8.8393	-86.157	-88.8889
2012-12-17 14:18:40	84.71	87.4	8.84625	-86.3507	-89.0928	2012-12-17 14:18:40
2012-12-17 14:28:40	84.91	87.59	8.85319	-86.5545	-89.2864
2012-12-17 14:38:40	85.1	87.82	8.86014	-86.7482	-89.5209
2012-12-17 14:48:40	85.29	87.97	8.86708	-86.9419	-89.6738
2012-12-17 14:58:40	85.48	88.18	8.87402	-87.1356	-89.8879
2012-12-17 15:08:40	85.69	88.4	8.88097	-87.3496	-90.1121
2012-12-17 15:18:40	85.86	88.55	8.88791	-87.5229	-90.265	2012-12-17 15:18:40
2012-12-17 15:28:40	86.06	88.75	8.89486	-87.7268	-90.4689
2012-12-17 15:38:40	86.26	88.95	8.9018	-87.9307	-90.6728
2012-12-17 15:48:40	86.45	89.12	8.90875	-88.1244	-90.8461
2012-12-17 15:58:40	86.65	89.33	8.91569	-88.3282	-91.0601
2012-12-17 16:08:40	86.81	89.51	8.92264	-88.4913	-91.2436
2012-12-17 16:18:40	87.05	89.72	8.92958	-88.736	-91.4577	2012-12-17 16:18:40
2012-12-17 16:28:40	87.24	89.9	8.93652	-88.9297	-91.6412
2012-12-17 16:38:40	87.41	90.11	8.94347	-89.103	-91.8552
2012-12-17 16:48:40	87.63	90.32	8.95041	-89.3272	-92.0693
2012-12-17 16:58:40	87.83	90.49	8.95736	-89.5311	-92.2426
2012-12-17 17:08:40	88.04	90.72	8.9643	-89.7452	-92.4771
2012-12-17 17:18:40	88.21	90.92	8.97125	-89.9185	-92.6809	2012-12-17 17:18:40
2012-12-17 17:28:40	88.4	91.11	8.97819	-90.1121	-92.8746
2012-12-17 17:38:40	88.6	91.29	8.98514	-90.316	-93.0581
2012-12-17 17:48:40	88.8	91.53	8.99208	-90.5199	-93.3028
2012-12-17 17:58:40	88.95	91.7	8.99902	-90.6728	-93.476
2012-12-17 18:08:40	89.18	91.92	9.00597	-90.9072	-93.7003
2012-12-17 18:18:40	89.41	92.14	9.01291	-91.1417	-93.9246	2012-12-17 18:18:40
2012-12-17 18:28:40	89.58	92.31	9.01986	-91.315	-94.0979
2012-12-17 18:38:40	89.77	92.52	9.0268	-91.5087	-94.3119
2012-12-17 18:48:40	89.97	92.69	9.03375	-91.7125	-94.4852
2012-12-17 18:58:40	90.16	92.97	9.04069	-91.9062	-94.7706
2012-12-17 19:08:40	90.42	93.16	9.04764	-92.1713	-94.9643
2012-12-17 19:18:40	90.61	93.36	9.05458	-92.3649	-95.1682	2012-12-17 19:18:40
2012-12-17 19:28:40	90.81	93.57	9.06152	-92.5688	-95.3823
2012-12-17 19:38:40	91	93.77	9.06847	-92.7625	-95.5861
2012-12-17 19:48:40	91.23	94	9.07541	-92.9969	-95.8206
2012-12-17 19:58:40	91.44	94.16	9.08236	-93.211	-95.9837
2012-12-17 20:08:40	91.67	94.44	9.0893	-93.4455	-96.2691
2012-12-17 20:18:40	91.87	94.64	9.09625	-93.6493	-96.473	2012-12-17 20:18:40
2012-12-17 20:28:40	92.04	94.8	9.10319	-93.8226	-96.6361
2012-12-17 20:38:40	92.28	95.06	9.11014	-94.0673	-96.9011
2012-12-17 20:48:40	92.5	95.27	9.11708	-94.2915	-97.1152
2012-12-17 20:58:40	92.72	95.5	9.12402	-94.5158	-97.3496
2012-12-17 21:08:40	92.94	95.73	9.13097	-94.7401	-97.5841
2012-12-17 21:18:40	93.17	95.87	9.13791	-94.9745	-97.7268	2012-12-17 21:18:40
2012-12-17 21:28:40	93.39	96.18	9.14486	-95.1988	-98.0428
2012-12-17 21:38:40	93.59	96.41	9.1518	-95.4027	-98.2773
2012-12-17 21:48:40	93.8	96.6	9.15875	-95.6167	-98.4709
2012-12-17 21:58:40	94.03	96.83	9.16569	-95.8512	-98.7054
2012-12-17 22:08:40	94.25	97.04	9.17264	-96.0754	-98.9195
2012-12-17 22:18:40	94.47	97.3	9.17958	-96.2997	-99.1845	2012-12-17 22:18:40
2012-12-17 22:28:40	94.69	97.53	9.18652	-96.524	-99.419
2012-12-17 22:38:40	94.92	97.75	9.19347	-96.7584	-99.6432
2012-12-17 22:48:40	95.11	97.94	9.20041	-96.9521	-99.8369
2012-12-17 22:58:40	95.3	98.15	9.20736	-97.1458	-100.051
2012-12-17 23:08:40	95.53	98.35	9.2143	-97.3802	-100.255
2012-12-17 23:18:40	95.76	98.62	9.22125	-97.6147	-100.53	2012-12-17 23:18:40
2012-12-17 23:28:40	96	98.84	9.22819	-97.8593	-100.754
2012-12-17 23:38:40	96.19	99.05	9.23514	-98.053	-100.968
2012-12-17 23:48:40	96.44	99.29	9.24208	-98.3078	-101.213
2012-12-17 23:58:40	96.65	99.48	9.24902	-98.5219	-101.407
2012-12-18 00:08:40	96.89	99.77	9.25597	-98.7666	-101.702
2012-12-18 00:18:40	97.11	99.98	9.26291	-98.9908	-101.916	2012-12-18 00:18:40
2012-12-18 00:28:40	97.35	100.16	9.26986	-99.2355	-102.1
2012-12-18 00:38:40	97.56	100.4	9.2768	-99.4495	-102.345
2012-12-18 00:48:40	97.81	100.7	9.28375	-99.7044	-102.65
2012-12-18 00:58:40	98.04	100.9	9.29069	-99.9388	-102.854
2012-12-18 01:08:40	98.23	101.15	9.29764	-100.133	-103.109
2012-12-18 01:18:40	98.47	101.37	9.30458	-100.377	-103.333	2012-12-18 01:18:40
2012-12-18 01:28:40	98.71	101.6	9.31152	-100.622	-103.568
2012-12-18 01:38:40	98.96	101.84	9.31847	-100.877	-103.812
2012-12-18 01:48:40	99.16	102	9.32541	-101.081	-103.976
2012-12-18 01:58:40	99.4	102.3	9.33236	-101.325	-104.281
2012-12-18 02:08:40	99.63	102.55	9.3393	-101.56	-104.536
2012-12-18 02:18:40	99.87	102.74	9.34625	-101.804	-104.73	2012-12-18 02:18:40
2012-12-18 02:28:40	100.1	103.03	9.35319	-102.039	-105.025
2012-12-18 02:38:40	100.34	103.27	9.36014	-102.283	-105.27
2012-12-18 02:48:40	100.5	103.5	9.36708	-102.446	-105.505
2012-12-18 02:58:40	100.8	103.77	9.37402	-102.752	-105.78
2012-12-18 03:08:40	101.06	104.03	9.38097	-103.017	-106.045
2012-12-18 03:18:40	101.33	104.25	9.38791	-103.293	-106.269	2012-12-18 03:18:40
2012-12-18 03:28:40	101.54	104.49	9.39486	-103.507	-106.514
2012-12-18 03:38:40	101.75	104.72	9.4018	-103.721	-106.748
2012-12-18 03:48:40	101.99	104.98	9.40875	-103.965	-107.013
2012-12-18 03:58:40	102.23	105.24	9.41569	-104.21	-107.278
2012-12-18 04:08:40	102.47	105.48	9.42264	-104.455	-107.523
2012-12-18 04:18:40	102.71	105.71	9.42958	-104.699	-107.757	2012-12-18 04:18:40
2012-12-18 04:28:40	102.92	105.94	9.43652	-104.913	-107.992
2012-12-18 04:38:40	103.13	106.14	9.44347	-105.127	-108.196
2012-12-18 04:48:40	103.37	106.36	9.45041	-105.372	-108.42
2012-12-18 04:58:40	103.62	106.64	9.45736	-105.627	-108.705
2012-12-18 05:08:40	103.82	106.86	9.4643	-105.831	-108.93
2012-12-18 05:18:40	104.07	107.12	9.47125	-106.086	-109.195	2012-12-18 05:18:40
2012-12-18 05:28:40	104.31	107.36	9.47819	-106.33	-109.439
2012-12-18 05:38:40	104.55	107.56	9.48514	-106.575	-109.643
2012-12-18 05:48:40	104.78	107.84	9.49208	-106.809	-109.929
2012-12-18 05:58:40	104.92	108.03	9.49902	-106.952	-110.122
2012-12-18 06:08:40	105.21	108.28	9.50597	-107.248	-110.377
2012-12-18 06:18:40	105.45	108.52	9.51291	-107.492	-110.622	2012-12-18 06:18:40
2012-12-18 06:28:40	105.69	108.75	9.51986	-107.737	-110.856
2012-12-18 06:38:40	105.92	109.01	9.5268	-107.971	-111.121
2012-12-18 06:48:40	106.14	109.2	9.53375	-108.196	-111.315
2012-12-18 06:58:40	106.39	109.5	9.54069	-108.451	-111.621
2012-12-18 07:08:40	106.63	109.69	9.54764	-108.695	-111.814
2012-12-18 07:18:40	106.88	109.97	9.55458	-108.95	-112.1	2012-12-18 07:18:40
2012-12-18 07:28:40	107.12	110.18	9.56152	-109.195	-112.314
2012-12-18 07:38:40	107.36	110.5	9.56847	-109.439	-112.64
2012-12-18 07:48:40	107.58	110.73	9.57541	-109.664	-112.875
2012-12-18 07:58:40	107.81	110.96	9.58236	-109.898	-113.109
2012-12-18 08:08:40	108.01	111.19	9.5893	-110.102	-113.344
2012-12-18 08:18:40	108.29	111.46	9.59625	-110.387	-113.619	2012-12-18 08:18:40
2012-12-18 08:28:40	108.54	111.78	9.60319	-110.642	-113.945
2012-12-18 08:38:40	108.62	111.88	9.61014	-110.724	-114.047
2012-12-18 08:48:40	108.9	112.11	9.61708	-111.009	-114.281
2012-12-18 08:58:40	109.19	112.35	9.62402	-111.305	-114.526
2012-12-18 09:08:40	109.45	112.68	9.63097	-111.57	-114.862
2012-12-18 09:18:40	109.7	112.95	9.63791	-111.825	-115.138	2012-12-18 09:18:40
2012-12-18 09:28:40	109.96	113.24	9.64486	-112.09	-115.433
2012-12-18 09:38:40	110.17	113.48	9.6518	-112.304	-115.678
2012-12-18 09:48:40	110.45	113.66	9.65875	-112.589	-115.861
2012-12-18 09:58:40	110.69	113.95	9.66569	-112.834	-116.157
2012-12-18 10:08:40	110.96	114.23	9.67264	-113.109	-116.442
2012-12-18 10:18:40	111.2	114.46	9.67958	-113.354	-116.677	2012-12-18 10:18:40
2012-12-18 10:28:40	111.42	114.75	9.68652	-113.578	-116.972
2012-12-18 10:38:40	111.71	115.02	9.69347	-113.874	-117.248
2012-12-18 10:48:40	111.92	115.26	9.70041	-114.088	-117.492
2012-12-18 10:58:40	112.2	115.55	9.70736	-114.373	-117.788
2012-12-18 11:08:40	112.48	115.79	9.7143	-114.659	-118.033
2012-12-18 11:18:40	112.73	116.09	9.72125	-114.913	-118.338	2012-12-18 11:18:40
2012-12-18 11:28:40	112.94	116.35	9.72819	-115.127	-118.603
2012-12-18 11:38:40	113.25	116.61	9.73514	-115.443	-118.869
2012-12-18 11:48:40	113.53	116.91	9.74208	-115.729	-119.174
2012-12-18 11:58:40	113.77	117.16	9.74902	-115.973	-119.429
2012-12-18 12:08:40	114	117.4	9.75597	-116.208	-119.674
2012-12-18 12:18:40	114.27	117.65	9.76291	-116.483	-119.929	2012-12-18 12:18:40
2012-12-18 12:28:40	114.41	117.91	9.76986	-116.626	-120.194
2012-12-18 12:38:40	114.78	118.16	9.7768	-117.003	-120.449
2012-12-18 12:48:40	115.02	118.43	9.78375	-117.248	-120.724
2012-12-18 12:58:40	115.27	118.7	9.79069	-117.503	-120.999
2012-12-18 13:08:40	115.53	118.97	9.79764	-117.768	-121.274
2012-12-18 13:18:40	115.79	119.23	9.80458	-118.033	-121.539	2012-12-18 13:18:40
2012-12-18 13:28:40	116.04	119.5	9.81152	-118.287	-121.814
2012-12-18 13:38:40	116.33	119.81	9.81847	-118.583	-122.13
2012-12-18 13:48:40	116.58	120.05	9.82541	-118.838	-122.375
2012-12-18 13:58:40	116.83	120.35	9.83236	-119.093	-122.681
2012-12-18 14:08:40	117.11	120.6	9.8393	-119.378	-122.936
2012-12-18 14:18:40	117.37	120.88	9.84625	-119.643	-123.221	2012-12-18 14:18:40
2012-12-18 14:28:40	117.59	121.17	9.85319	-119.867	-123.517
2012-12-18 14:38:40	117.93	121.42	9.86014	-120.214	-123.772
2012-12-18 14:48:40	118.17	121.72	9.86708	-120.459	-124.077
2012-12-18 14:58:40	118.41	121.99	9.87402	-120.703	-124.353
2012-12-18 15:08:40	118.7	122.28	9.88097	-120.999	-124.648
2012-12-18 15:18:40	118.97	122.47	9.88791	-121.274	-124.842	2012-12-18 15:18:40
2012-12-18 15:28:40	119.24	122.82	9.89486	-121.549	-125.199
2012-12-18 15:38:40	119.51	123.07	9.9018	-121.825	-125.454
2012-12-18 15:48:40	119.79	123.42	9.90875	-122.11	-125.81
2012-12-18 15:58:40	120.08	123.69	9.91569	-122.406	-126.086
2012-12-18 16:08:40	120.16	123.97	9.92264	-122.487	-126.371
2012-12-18 16:18:40	120.56	124.28	9.92958	-122.895	-126.687	2012-12-18 16:18:40
2012-12-18 16:28:40	120.48	123.71	9.93652	-122.813	-126.106
2012-12-18 16:38:40	120.95	124.67	9.94347	-123.293	-127.085
2012-12-18 16:48:40	121.28	124.98	9.95041	-123.629	-127.401
2012-12-18 16:58:40	121.57	125.28	9.95736	-123.925	-127.706
2012-12-18 17:08:40	121.83	125.57	9.9643	-124.19	-128.002
2012-12-18 17:18:40	121.95	125.83	9.97125	-124.312	-128.267	2012-12-18 17:18:40
2012-12-18 17:28:40	122.39	126.14	9.97819	-124.76	-128.583
2012-12-18 17:38:40	122.66	126.38	9.98514	-125.036	-128.828
2012-12-18 17:48:40	122.94	126.68	9.99208	-125.321	-129.134
2012-12-18 17:58:40	123.19	126.95	9.99902	-125.576	-129.409
2012-12-18 18:08:40	123.46	127.24	10.006	-125.851	-129.704
2012-12-18 18:18:40	123.74	127.5	10.0129	-126.137	-129.969	2012-12-18 18:18:40
2012-12-18 18:28:40	124.02	127.78	10.0199	-126.422	-130.255
2012-12-18 18:38:40	124.28	128.1	10.0268	-126.687	-130.581
2012-12-18 18:48:40	124.56	128.4	10.0337	-126.972	-130.887
2012-12-18 18:58:40	124.83	128.68	10.0407	-127.248	-131.172
2012-12-18 19:08:40	125.1	128.94	10.0476	-127.523	-131.437
2012-12-18 19:18:40	125.36	129.23	10.0546	-127.788	-131.733	2012-12-18 19:18:40
2012-12-18 19:28:40	125.66	129.53	10.0615	-128.094	-132.039
2012-12-18 19:38:40	125.94	129.79	10.0685	-128.379	-132.304
2012-12-18 19:48:40	126.2	130.09	10.0754	-128.644	-132.61
2012-12-18 19:58:40	126.49	130.39	10.0824	-128.94	-132.915
2012-12-18 20:08:40	126.78	130.65	10.0893	-129.235	-133.18
2012-12-18 20:18:40	127.07	131	10.0962	-129.531	-133.537	2012-12-18 20:18:40
2012-12-18 20:28:40	127.34	131.22	10.1032	-129.806	-133.761
2012-12-18 20:38:40	127.62	131.53	10.1101	-130.092	-134.077
2012-12-18 20:48:40	127.87	131.85	10.1171	-130.347	-134.404
2012-12-18 20:58:40	128.16	132.09	10.124	-130.642	-134.648
2012-12-18 21:08:40	128.43	132.13	10.131	-130.917	-134.689
2012-12-18 21:18:40	128.71	132.71	10.1379	-131.203	-135.28	2012-12-18 21:18:40
2012-12-18 21:28:40	128.96	132.98	10.1449	-131.458	-135.556
2012-12-18 21:38:40	129.25	133.28	10.1518	-131.753	-135.861
2012-12-18 21:48:40	129.49	133.54	10.1587	-131.998	-136.126
2012-12-18 21:58:40	129.77	133.8	10.1657	-132.283	-136.391
2012-12-18 22:08:40	130.05	134.1	10.1726	-132.569	-136.697
2012-12-18 22:18:40	130.33	134.37	10.1796	-132.854	-136.972	2012-12-18 22:18:40
2012-12-18 22:28:40	130.58	134.67	10.1865	-133.109	-137.278
2012-12-18 22:38:40	130.86	134.98	10.1935	-133.394	-137.594
2012-12-18 22:48:40	131.14	135.28	10.2004	-133.68	-137.9
2012-12-18 22:58:40	131.42	135.57	10.2074	-133.965	-138.196
2012-12-18 23:08:40	131.68	135.86	10.2143	-134.23	-138.491
2012-12-18 23:18:40	131.97	136.13	10.2212	-134.526	-138.767	2012-12-18 23:18:40
2012-12-18 23:28:40	132.24	136.4	10.2282	-134.801	-139.042
2012-12-18 23:38:40	132.48	136.69	10.2351	-135.046	-139.337
2012-12-18 23:48:40	132.78	137.02	10.2421	-135.352	-139.674
2012-12-18 23:58:40	133.07	137.27	10.249	-135.647	-139.929
2012-12-19 00:08:40	133.32	137.6	10.256	-135.902	-140.265
2012-12-19 00:18:40	133.6	137.85	10.2629	-136.188	-140.52	2012-12-19 00:18:40
2012-12-19 00:28:40	133.84	138.17	10.2699	-136.432	-140.846
2012-12-19 00:38:40	134.06	138.43	10.2768	-136.656	-141.111
2012-12-19 00:48:40	134.42	138.71	10.2837	-137.023	-141.397
2012-12-19 00:58:40	134.67	139.01	10.2907	-137.278	-141.702
2012-12-19 01:08:40	134.94	139.3	10.2976	-137.554	-141.998
2012-12-19 01:18:40	135.2	139.58	10.3046	-137.819	-142.283	2012-12-19 01:18:40
2012-12-19 01:28:40	135.49	139.88	10.3115	-138.114	-142.589
2012-12-19 01:38:40	135.76	140.16	10.3185	-138.389	-142.875
2012-12-19 01:48:40	136.02	140.38	10.3254	-138.654	-143.099
2012-12-19 01:58:40	136.29	140.68	10.3324	-138.93	-143.405
2012-12-19 02:08:40	136.55	141.02	10.3393	-139.195	-143.751
2012-12-19 02:18:40	136.8	141.28	10.3462	-139.45	-144.016	2012-12-19 02:18:40
2012-12-19 02:28:40	137.08	141.56	10.3532	-139.735	-144.302
2012-12-19 02:38:40	137.36	141.88	10.3601	-140.02	-144.628
2012-12-19 02:48:40	137.48	142.16	10.3671	-140.143	-144.913
2012-12-19 02:58:40	137.88	142.43	10.374	-140.55	-145.189
2012-12-19 03:08:40	138.16	142.74	10.381	-140.836	-145.505
2012-12-19 03:18:40	138.42	142.99	10.3879	-141.101	-145.759	2012-12-19 03:18:40
2012-12-19 03:28:40	138.69	143.28	10.3949	-141.376	-146.055
2012-12-19 03:38:40	138.94	143.57	10.4018	-141.631	-146.351
2012-12-19 03:48:40	139.21	143.88	10.4087	-141.906	-146.667
2012-12-19 03:58:40	139.49	144.16	10.4157	-142.192	-146.952
2012-12-19 04:08:40	139.75	144.46	10.4226	-142.457	-147.258
2012-12-19 04:18:40	140.01	144.72	10.4296	-142.722	-147.523	2012-12-19 04:18:40
2012-12-19 04:28:40	140.27	145.02	10.4365	-142.987	-147.829
2012-12-19 04:38:40	140.52	145.31	10.4435	-143.242	-148.124
2012-12-19 04:48:40	140.78	145.56	10.4504	-143.507	-148.379
2012-12-19 04:58:40	141.05	145.85	10.4574	-143.782	-148.675
2012-12-19 05:08:40	141.31	146.09	10.4643	-144.047	-148.919
2012-12-19 05:18:40	141.59	146.43	10.4712	-144.332	-149.266	2012-12-19 05:18:40
2012-12-19 05:28:40	141.83	146.69	10.4782	-144.577	-149.531
2012-12-19 05:38:40	142.1	146.97	10.4851	-144.852	-149.817
2012-12-19 05:48:40	142.34	147.25	10.4921	-145.097	-150.102
2012-12-19 05:58:40	142.6	147.53	10.499	-145.362	-150.387
2012-12-19 06:08:40	142.88	147.79	10.506	-145.647	-150.652
2012-12-19 06:18:40	143.14	148.04	10.5129	-145.912	-150.907	2012-12-19 06:18:40
2012-12-19 06:28:40	143.38	148.34	10.5199	-146.157	-151.213
2012-12-19 06:38:40	143.64	148.62	10.5268	-146.422	-151.498
2012-12-19 06:48:40	143.89	148.91	10.5337	-146.677	-151.794
2012-12-19 06:58:40	144.14	149.18	10.5407	-146.932	-152.069
2012-12-19 07:08:40	144.4	149.46	10.5476	-147.197	-152.355
2012-12-19 07:18:40	144.59	149.71	10.5546	-147.39	-152.61	2012-12-19 07:18:40
2012-12-19 07:28:40	144.86	149.98	10.5615	-147.666	-152.885
2012-12-19 07:38:40	145.1	150.24	10.5685	-147.91	-153.15
2012-12-19 07:48:40	145.32	150.51	10.5754	-148.135	-153.425
2012-12-19 07:58:40	145.58	150.74	10.5824	-148.4	-153.66
2012-12-19 08:08:40	144.67	149.75	10.5893	-147.472	-152.65
2012-12-19 08:18:40	145.95	151.29	10.5962	-148.777	-154.22	2012-12-19 08:18:40
2012-12-19 08:28:40	146.23	151.49	10.6032	-149.062	-154.424
2012-12-19 08:38:40	146.49	151.81	10.6101	-149.327	-154.75
2012-12-19 08:48:40	146.87	152.22	10.6171	-149.715	-155.168
2012-12-19 08:58:40	147.11	152.48	10.624	-149.959	-155.433
2012-12-19 09:08:40	147.34	152.69	10.631	-150.194	-155.647
2012-12-19 09:18:40	147.6	152.96	10.6379	-150.459	-155.923	2012-12-19 09:18:40
2012-12-19 09:28:40	147.83	153.23	10.6449	-150.693	-156.198
2012-12-19 09:38:40	148.08	153.48	10.6518	-150.948	-156.453
2012-12-19 09:48:40	148.31	153.74	10.6587	-151.182	-156.718
2012-12-19 09:58:40	148.55	153.98	10.6657	-151.427	-156.962
2012-12-19 10:08:40	148.79	154.21	10.6726	-151.672	-157.197
2012-12-19 10:18:40	149.03	154.51	10.6796	-151.916	-157.503	2012-12-19 10:18:40
2012-12-19 10:28:40	149.26	154.76	10.6865	-152.151	-157.757
2012-12-19 10:38:40	149.45	155.01	10.6935	-152.345	-158.012
2012-12-19 10:48:40	149.7	155.25	10.7004	-152.599	-158.257
2012-12-19 10:58:40	149.91	155.48	10.7074	-152.813	-158.491
2012-12-19 11:08:40	150.16	155.75	10.7143	-153.068	-158.767
2012-12-19 11:18:40	150.37	155.97	10.7212	-153.282	-158.991	2012-12-19 11:18:40
2012-12-19 11:28:40	150.58	156.22	10.7282	-153.496	-159.246
2012-12-19 11:38:40	150.83	156.47	10.7351	-153.751	-159.501
2012-12-19 11:48:40	151.05	156.71	10.7421	-153.976	-159.745
2012-12-19 11:58:40	151.27	156.96	10.749	-154.2	-160
2012-12-19 12:08:40	151.49	157.2	10.756	-154.424	-160.245
2012-12-19 12:18:40	151.71	157.39	10.7629	-154.648	-160.438	2012-12-19 12:18:40
2012-12-19 12:28:40	151.92	157.63	10.7699	-154.862	-160.683
2012-12-19 12:38:40	152.09	157.88	10.7768	-155.036	-160.938
2012-12-19 12:48:40	152.36	158.12	10.7837	-155.311	-161.182
2012-12-19 12:58:40	152.57	158.33	10.7907	-155.525	-161.397
2012-12-19 13:08:40	152.78	158.54	10.7976	-155.739	-161.611
2012-12-19 13:18:40	152.98	158.79	10.8046	-155.943	-161.865	2012-12-19 13:18:40
2012-12-19 13:28:40	153.2	159.04	10.8115	-156.167	-162.12
2012-12-19 13:38:40	153.42	159.27	10.8185	-156.391	-162.355
2012-12-19 13:48:40	153.63	159.5	10.8254	-156.606	-162.589
2012-12-19 13:58:40	153.83	159.71	10.8324	-156.809	-162.803
2012-12-19 14:08:40	154.03	159.91	10.8393	-157.013	-163.007
2012-12-19 14:18:40	154.24	160.13	10.8462	-157.227	-163.231	2012-12-19 14:18:40
2012-12-19 14:28:40	154.45	160.4	10.8532	-157.441	-163.507
2012-12-19 14:38:40	154.64	160.58	10.8601	-157.635	-163.69
2012-12-19 14:48:40	154.86	160.8	10.8671	-157.859	-163.914
2012-12-19 14:58:40	155.03	161.05	10.874	-158.033	-164.169
2012-12-19 15:08:40	155.24	161.25	10.881	-158.247	-164.373
2012-12-19 15:18:40	155.44	161.48	10.8879	-158.451	-164.608	2012-12-19 15:18:40
2012-12-19 15:28:40	155.65	161.65	10.8949	-158.665	-164.781
2012-12-19 15:38:40	155.84	161.89	10.9018	-158.858	-165.025
2012-12-19 15:48:40	156.03	162.12	10.9087	-159.052	-165.26
2012-12-19 15:58:40	156.21	162.34	10.9157	-159.235	-165.484
2012-12-19 16:08:40	156.42	162.53	10.9226	-159.45	-165.678
2012-12-19 16:18:40	156.6	162.68	10.9296	-159.633	-165.831	2012-12-19 16:18:40
2012-12-19 16:28:40	156.79	162.92	10.9365	-159.827	-166.075
2012-12-19 16:38:40	156.98	163.11	10.9435	-160.02	-166.269
2012-12-19 16:48:40	156.64	162.8	10.9504	-159.674	-165.953
2012-12-19 16:58:40	157.03	163.17	10.9574	-160.071	-166.33
2012-12-19 17:08:40	157.24	163.45	10.9643	-160.285	-166.616
2012-12-19 17:18:40	157.47	163.68	10.9712	-160.52	-166.85	2012-12-19 17:18:40
2012-12-19 17:28:40	157.67	163.92	10.9782	-160.724	-167.095
2012-12-19 17:38:40	157.84	164.09	10.9851	-160.897	-167.268
2012-12-19 17:48:40	158.04	164.06	10.9921	-161.101	-167.238
2012-12-19 17:58:40	158.17	164.47	10.999	-161.233	-167.655
2012-12-19 18:08:40	158.42	164.71	11.006	-161.488	-167.9
2012-12-19 18:18:40	158.57	164.9	11.0129	-161.641	-168.094	2012-12-19 18:18:40
2012-12-19 18:28:40	158.78	165.09	11.0199	-161.855	-168.287
2012-12-19 18:38:40	158.97	165.29	11.0268	-162.049	-168.491
2012-12-19 18:48:40	159.13	165.45	11.0337	-162.212	-168.654
2012-12-19 18:58:40	159.32	165.68	11.0407	-162.406	-168.889
2012-12-19 19:08:40	159.5	165.85	11.0476	-162.589	-169.062
2012-12-19 19:18:40	159.68	166.06	11.0546	-162.773	-169.276	2012-12-19 19:18:40
2012-12-19 19:28:40	159.86	166.2	11.0615	-162.956	-169.419
2012-12-19 19:38:40	160.05	166.45	11.0685	-163.15	-169.674
2012-12-19 19:48:40	160.22	166.61	11.0754	-163.323	-169.837
2012-12-19 19:58:40	160.4	166.78	11.0824	-163.507	-170.01
2012-12-19 20:08:40	160.56	167	11.0893	-163.67	-170.234
2012-12-19 20:18:40	160.74	167.19	11.0962	-163.853	-170.428	2012-12-19 20:18:40
2012-12-19 20:28:40	160.9	167.34	11.1032	-164.016	-170.581
2012-12-19 20:38:40	161.07	167.54	11.1101	-164.19	-170.785
2012-12-19 20:48:40	161.25	167.72	11.1171	-164.373	-170.968
2012-12-19 20:58:40	161.43	167.91	11.124	-164.557	-171.162
2012-12-19 21:08:40	161.59	168.08	11.131	-164.72	-171.335
2012-12-19 21:18:40	161.76	168.26	11.1379	-164.893	-171.519	2012-12-19 21:18:40
2012-12-19 21:28:40	161.92	168.32	11.1449	-165.056	-171.58
2012-12-19 21:38:40	162.08	168.58	11.1518	-165.219	-171.845
2012-12-19 21:48:40	162.23	168.73	11.1587	-165.372	-171.998
2012-12-19 21:58:40	162.41	168.93	11.1657	-165.556	-172.202
2012-12-19 22:08:40	162.57	169.06	11.1726	-165.719	-172.334
2012-12-19 22:18:40	162.72	169.26	11.1796	-165.872	-172.538	2012-12-19 22:18:40
2012-12-19 22:28:40	162.87	169.41	11.1865	-166.024	-172.691
2012-12-19 22:38:40	163.03	169.58	11.1935	-166.188	-172.864
2012-12-19 22:48:40	163.18	169.75	11.2004	-166.34	-173.038
2012-12-19 22:58:40	163.34	169.9	11.2074	-166.504	-173.191
2012-12-19 23:08:40	163.47	170.05	11.2143	-166.636	-173.344
2012-12-19 23:18:40	163.63	170.22	11.2212	-166.799	-173.517	2012-12-19 23:18:40
2012-12-19 23:28:40	163.76	170.37	11.2282	-166.932	-173.67
2012-12-19 23:38:40	163.91	170.5	11.2351	-167.085	-173.802
2012-12-19 23:48:40	164.04	170.63	11.2421	-167.217	-173.935
2012-12-19 23:58:40	164.19	170.76	11.249	-167.37	-174.067
2012-12-20 00:08:40	164.32	170.89	11.256	-167.503	-174.2
2012-12-20 00:18:40	164.46	171.09	11.2629	-167.645	-174.404	2012-12-20 00:18:40
2012-12-20 00:28:40	164.61	171.24	11.2699	-167.798	-174.557
2012-12-20 00:38:40	164.73	171.39	11.2768	-167.92	-174.709
2012-12-20 00:48:40	164.88	171.51	11.2837	-168.073	-174.832
2012-12-20 00:58:40	165.02	171.7	11.2907	-168.216	-175.025
2012-12-20 01:08:40	165.16	171.82	11.2976	-168.359	-175.148
2012-12-20 01:18:40	165.31	171.99	11.3046	-168.512	-175.321	2012-12-20 01:18:40
2012-12-20 01:28:40	165.43	172.16	11.3115	-168.634	-175.494
2012-12-20 01:38:40	165.74	172.45	11.3185	-168.95	-175.79
2012-12-20 01:48:40	165.87	172.61	11.3254	-169.083	-175.953
2012-12-20 01:58:40	166.02	172.76	11.3324	-169.235	-176.106
2012-12-20 02:08:40	166.15	172.89	11.3393	-169.368	-176.239
2012-12-20 02:18:40	166.28	173.05	11.3462	-169.501	-176.402	2012-12-20 02:18:40
2012-12-20 02:28:40	166.41	173.17	11.3532	-169.633	-176.524
2012-12-20 02:38:40	166.55	173.32	11.3601	-169.776	-176.677
2012-12-20 02:48:40	166.68	173.42	11.3671	-169.908	-176.779
2012-12-20 02:58:40	166.81	173.58	11.374	-170.041	-176.942
2012-12-20 03:08:40	166.93	173.71	11.381	-170.163	-177.074
2012-12-20 03:18:40	167.06	173.85	11.3879	-170.296	-177.217	2012-12-20 03:18:40
2012-12-20 03:28:40	167.19	174	11.3949	-170.428	-177.37
2012-12-20 03:38:40	167.31	174.15	11.4018	-170.55	-177.523
2012-12-20 03:48:40	167.44	174.26	11.4087	-170.683	-177.635
2012-12-20 03:58:40	167.56	174.41	11.4157	-170.805	-177.788
2012-12-20 04:08:40	167.69	174.5	11.4226	-170.938	-177.88
2012-12-20 04:18:40	167.81	174.63	11.4296	-171.06	-178.012	2012-12-20 04:18:40
2012-12-20 04:28:40	167.94	174.81	11.4365	-171.193	-178.196
2012-12-20 04:38:40	168.05	174.85	11.4435	-171.305	-178.236
2012-12-20 04:48:40	168.16	175.07	11.4504	-171.417	-178.461
2012-12-20 04:58:40	168.3	175.14	11.4574	-171.56	-178.532
2012-12-20 05:08:40	168.42	175.3	11.4643	-171.682	-178.695
2012-12-20 05:18:40	168.53	175.45	11.4712	-171.794	-178.848	2012-12-20 05:18:40
2012-12-20 05:28:40	168.65	175.58	11.4782	-171.916	-178.981
2012-12-20 05:38:40	168.78	175.7	11.4851	-172.049	-179.103
2012-12-20 05:48:40	168.89	175.8	11.4921	-172.161	-179.205
2012-12-20 05:58:40	169.01	175.94	11.499	-172.283	-179.348
2012-12-20 06:08:40	169.12	176.02	11.506	-172.396	-179.429
2012-12-20 06:18:40	169.24	176.19	11.5129	-172.518	-179.602	2012-12-20 06:18:40
2012-12-20 06:28:40	169.35	176.32	11.5199	-172.63	-179.735
2012-12-20 06:38:40	169.46	176.42	11.5268	-172.742	-179.837
2012-12-20 06:48:40	169.56	176.55	11.5337	-172.844	-179.969
2012-12-20 06:58:40	169.67	176.67	11.5407	-172.956	-180.092
2012-12-20 07:08:40	169.8	176.74	11.5476	-173.089	-180.163
2012-12-20 07:18:40	169.88	176.93	11.5546	-173.17	-180.357	2012-12-20 07:18:40
2012-12-20 07:28:40	169.98	177.05	11.5615	-173.272	-180.479
2012-12-20 07:38:40	170.09	177.16	11.5685	-173.384	-180.591
2012-12-20 07:48:40	170.17	177.28	11.5754	-173.466	-180.714
2012-12-20 07:58:40	170.27	177.37	11.5824	-173.568	-180.805
2012-12-20 08:08:40	170.38	177.48	11.5893	-173.68	-180.917
2012-12-20 08:18:40	170.47	177.58	11.5962	-173.772	-181.019	2012-12-20 08:18:40
2012-12-20 08:28:40	170.08	176.95	11.6032	-173.374	-180.377
2012-12-20 08:38:40	170.39	177.55	11.6101	-173.69	-180.989
2012-12-20 08:48:40	170.5	177.69	11.6171	-173.802	-181.131
2012-12-20 08:58:40	170.61	177.84	11.624	-173.914	-181.284
2012-12-20 09:08:40	170.72	177.96	11.631	-174.027	-181.407
2012-12-20 09:18:40	170.83	178.04	11.6379	-174.139	-181.488	2012-12-20 09:18:40
2012-12-20 09:28:40	170.92	178.17	11.6449	-174.23	-181.621
2012-12-20 09:38:40	171.06	178.29	11.6518	-174.373	-181.743
2012-12-20 09:48:40	171.18	178.41	11.6587	-174.495	-181.865
2012-12-20 09:58:40	171.3	178.53	11.6657	-174.618	-181.988
2012-12-20 10:08:40	171.41	178.66	11.6726	-174.73	-182.12
2012-12-20 10:18:40	171.51	178.74	11.6796	-174.832	-182.202	2012-12-20 10:18:40
2012-12-20 10:28:40	171.61	178.85	11.6865	-174.934	-182.314
2012-12-20 10:38:40	171.7	179.01	11.6935	-175.025	-182.477
2012-12-20 10:48:40	171.77	179.12	11.7004	-175.097	-182.589
2012-12-20 10:58:40	171.86	179.17	11.7074	-175.189	-182.64
2012-12-20 11:08:40	171.94	179.32	11.7143	-175.27	-182.793
2012-12-20 11:18:40	172	179.41	11.7212	-175.331	-182.885	2012-12-20 11:18:40
2012-12-20 11:28:40	172.07	179.52	11.7282	-175.403	-182.997
2012-12-20 11:38:40	172.28	179.73	11.7351	-175.617	-183.211
2012-12-20 11:48:40	172.33	179.8	11.7421	-175.668	-183.282
2012-12-20 11:58:40	172.38	179.87	11.749	-175.719	-183.354
2012-12-20 12:08:40	172.42	179.94	11.756	-175.759	-183.425
2012-12-20 12:18:40	172.09	179.55	11.7629	-175.423	-183.028	2012-12-20 12:18:40
2012-12-20 12:28:40	171.69	177.86	11.7699	-175.015	-181.305
2012-12-20 12:38:40	171.63	178.93	11.7768	-174.954	-182.396
2012-12-20 12:48:40	172	179.61	11.7837	-175.331	-183.089
2012-12-20 12:58:40	172.2	179.86	11.7907	-175.535	-183.344
2012-12-20 13:08:40	172.37	180.06	11.7976	-175.708	-183.547
2012-12-20 13:18:40	172.54	180.29	11.8046	-175.882	-183.782	2012-12-20 13:18:40
2012-12-20 13:28:40	172.61	180.51	11.8115	-175.953	-184.006
2012-12-20 13:38:40	172.81	180.59	11.8185	-176.157	-184.088
2012-12-20 13:48:40	172.96	180.79	11.8254	-176.31	-184.292
2012-12-20 13:58:40	173.29	181.13	11.8324	-176.646	-184.638
2012-12-20 14:08:40	173.42	181.31	11.8393	-176.779	-184.822
2012-12-20 14:18:40	173.54	181.45	11.8462	-176.901	-184.964	2012-12-20 14:18:40
2012-12-20 14:28:40	173.68	181.62	11.8532	-177.044	-185.138
2012-12-20 14:38:40	173.81	181.76	11.8601	-177.176	-185.28
2012-12-20 14:48:40	173.92	181.93	11.8671	-177.288	-185.454
2012-12-20 14:58:40	174.05	182.08	11.874	-177.421	-185.607
2012-12-20 15:08:40	174.16	182.19	11.881	-177.533	-185.719
2012-12-20 15:18:40	174.28	182.39	11.8879	-177.655	-185.923	2012-12-20 15:18:40
2012-12-20 15:28:40	174.41	182.54	11.8949	-177.788	-186.075
2012-12-20 15:38:40	174.48	182.63	11.9018	-177.859	-186.167
2012-12-20 15:48:40	174.64	182.82	11.9087	-178.022	-186.361
2012-12-20 15:58:40	174.74	182.96	11.9157	-178.124	-186.504
2012-12-20 16:08:40	174.76	183.08	11.9226	-178.145	-186.626
2012-12-20 16:18:40	174.95	183.27	11.9296	-178.338	-186.82	2012-12-20 16:18:40
2012-12-20 16:28:40	175.07	183.4	11.9365	-178.461	-186.952
2012-12-20 16:38:40	175.19	183.55	11.9435	-178.583	-187.105
2012-12-20 16:48:40	175.31	183.67	11.9504	-178.705	-187.227
2012-12-20 16:58:40	175.41	183.84	11.9574	-178.807	-187.401
2012-12-20 17:08:40	175.52	183.99	11.9643	-178.919	-187.554
2012-12-20 17:18:40	175.63	184.13	11.9712	-179.032	-187.696	2012-12-20 17:18:40
2012-12-20 17:28:40	175.45	183.95	11.9782	-178.848	-187.513
2012-12-20 17:38:40	175.58	184.2	11.9851	-178.981	-187.768
2012-12-20 17:48:40	175.7	184.36	11.9921	-179.103	-187.931
2012-12-20 17:58:40	175.85	184.52	11.999	-179.256	-188.094
2012-12-20 18:08:40	175.95	184.58	12.006	-179.358	-188.155
2012-12-20 18:18:40	176.06	184.83	12.0129	-179.47	-188.41	2012-12-20 18:18:40
2012-12-20 18:28:40	176.17	184.98	12.0199	-179.582	-188.563
2012-12-20 18:38:40	176.25	185.09	12.0268	-179.664	-188.675
2012-12-20 18:48:40	176.38	185.19	12.0337	-179.796	-188.777
2012-12-20 18:58:40	176.47	185.38	12.0407	-179.888	-188.97
2012-12-20 19:08:40	176.58	185.56	12.0476	-180	-189.154
2012-12-20 19:18:40	176.68	185.7	12.0546	-180.102	-189.297	2012-12-20 19:18:40
2012-12-20 19:28:40	176.79	185.85	12.0615	-180.214	-189.45
2012-12-20 19:38:40	176.88	185.99	12.0685	-180.306	-189.592
2012-12-20 19:48:40	176.99	186.16	12.0754	-180.418	-189.766
2012-12-20 19:58:40	177.08	186.31	12.0824	-180.51	-189.918
2012-12-20 20:08:40	177.19	186.49	12.0893	-180.622	-190.102
2012-12-20 20:18:40	177.31	186.62	12.0962	-180.744	-190.234	2012-12-20 20:18:40
2012-12-20 20:28:40	177.42	186.79	12.1032	-180.856	-190.408
2012-12-20 20:38:40	177.54	186.98	12.1101	-180.979	-190.601
2012-12-20 20:48:40	177.63	187.12	12.1171	-181.07	-190.744
2012-12-20 20:58:40	177.73	187.27	12.124	-181.172	-190.897
2012-12-20 21:08:40	177.84	187.39	12.131	-181.284	-191.019
2012-12-20 21:18:40	177.92	187.55	12.1379	-181.366	-191.182	2012-12-20 21:18:40
2012-12-20 21:28:40	178.05	187.73	12.1449	-181.498	-191.366
2012-12-20 21:38:40	178.15	187.86	12.1518	-181.6	-191.498
2012-12-20 21:48:40	178.25	188.05	12.1587	-181.702	-191.692
2012-12-20 21:58:40	178.35	188.14	12.1657	-181.804	-191.784
2012-12-20 22:08:40	178.34	188.32	12.1726	-181.794	-191.967
2012-12-20 22:18:40	178.54	188.48	12.1796	-181.998	-192.13	2012-12-20 22:18:40
2012-12-20 22:28:40	178.65	188.64	12.1865	-182.11	-192.294
2012-12-20 22:38:40	178.75	188.8	12.1935	-182.212	-192.457
2012-12-20 22:48:40	178.84	188.99	12.2004	-182.304	-192.65
2012-12-20 22:58:40	178.94	189.18	12.2074	-182.406	-192.844
2012-12-20 23:08:40	179.03	189.3	12.2143	-182.497	-192.966
2012-12-20 23:18:40	179.13	189.46	12.2212	-182.599	-193.129	2012-12-20 23:18:40
2012-12-20 23:28:40	179.22	189.6	12.2282	-182.691	-193.272
2012-12-20 23:38:40	179.33	189.77	12.2351	-182.803	-193.445
2012-12-20 23:48:40	179.41	189.92	12.2421	-182.885	-193.598
2012-12-20 23:58:40	179.52	190.1	12.249	-182.997	-193.782
2012-12-21 00:08:40	179.62	190.26	12.256	-183.099	-193.945
2012-12-21 00:18:40	179.72	190.43	12.2629	-183.201	-194.118	2012-12-21 00:18:40
2012-12-21 00:28:40	179.81	190.62	12.2699	-183.293	-194.312
2012-12-21 00:38:40	179.92	190.76	12.2768	-183.405	-194.455
2012-12-21 00:48:40	180	190.96	12.2837	-183.486	-194.659
2012-12-21 00:58:40	180.1	191.1	12.2907	-183.588	-194.801
2012-12-21 01:08:40	180.19	191.28	12.2976	-183.68	-194.985
2012-12-21 01:18:40	180.28	191.45	12.3046	-183.772	-195.158	2012-12-21 01:18:40
2012-12-21 01:28:40	180.39	191.61	12.3115	-183.884	-195.321
2012-12-21 01:38:40	180.48	191.78	12.3185	-183.976	-195.494
2012-12-21 01:48:40	180.58	191.96	12.3254	-184.077	-195.678
2012-12-21 01:58:40	180.65	192.11	12.3324	-184.149	-195.831
2012-12-21 02:08:40	180.72	192.32	12.3393	-184.22	-196.045
2012-12-21 02:18:40	180.85	192.44	12.3462	-184.353	-196.167	2012-12-21 02:18:40
2012-12-21 02:28:40	180.93	192.66	12.3532	-184.434	-196.391
2012-12-21 02:38:40	181.04	192.79	12.3601	-184.546	-196.524
2012-12-21 02:48:40	181.12	192.95	12.3671	-184.628	-196.687
2012-12-21 02:58:40	181.22	193.18	12.374	-184.73	-196.922
2012-12-21 03:08:40	181.32	193.3	12.381	-184.832	-197.044
2012-12-21 03:18:40	181.37	193.52	12.3879	-184.883	-197.268	2012-12-21 03:18:40
2012-12-21 03:28:40	181.5	193.7	12.3949	-185.015	-197.452
2012-12-21 03:38:40	181.59	193.87	12.4018	-185.107	-197.625
2012-12-21 03:48:40	181.68	194.03	12.4087	-185.199	-197.788
2012-12-21 03:58:40	181.77	194.2	12.4157	-185.291	-197.961
2012-12-21 04:08:40	181.83	194.42	12.4226	-185.352	-198.186
2012-12-21 04:18:40	181.96	194.64	12.4296	-185.484	-198.41	2012-12-21 04:18:40
2012-12-21 04:28:40	182.03	194.79	12.4365	-185.556	-198.563
2012-12-21 04:38:40	182.15	194.99	12.4435	-185.678	-198.767
2012-12-21 04:48:40	182.24	195.18	12.4504	-185.77	-198.96
2012-12-21 04:58:40	182.34	195.35	12.4574	-185.872	-199.134
2012-12-21 05:08:40	182.42	195.55	12.4643	-185.953	-199.337
2012-12-21 05:18:40	182.53	195.75	12.4712	-186.065	-199.541	2012-12-21 05:18:40
2012-12-21 05:28:40	182.61	195.94	12.4782	-186.147	-199.735
2012-12-21 05:38:40	182.7	196.11	12.4851	-186.239	-199.908
2012-12-21 05:48:40	182.81	196.26	12.4921	-186.351	-200.061
2012-12-21 05:58:40	182.89	196.53	12.499	-186.432	-200.336
2012-12-21 06:08:40	182.98	196.71	12.506	-186.524	-200.52
2012-12-21 06:18:40	183.07	196.95	12.5129	-186.616	-200.765	2012-12-21 06:18:40
2012-12-21 06:28:40	183.18	197.15	12.5199	-186.728	-200.968
2012-12-21 06:38:40	183.25	197.33	12.5268	-186.799	-201.152
2012-12-21 06:48:40	183.35	197.5	12.5337	-186.901	-201.325
2012-12-21 06:58:40	183.45	197.72	12.5407	-187.003	-201.549
2012-12-21 07:08:40	183.53	197.88	12.5476	-187.085	-201.713
2012-12-21 07:18:40	183.63	198.09	12.5546	-187.187	-201.927	2012-12-21 07:18:40
2012-12-21 07:28:40	183.73	198.25	12.5615	-187.288	-202.09
2012-12-21 07:38:40	183.79	198.5	12.5685	-187.35	-202.345
2012-12-21 07:48:40	183.91	198.71	12.5754	-187.472	-202.559
2012-12-21 07:58:40	183.98	198.87	12.5824	-187.543	-202.722
2012-12-21 08:08:40	184.06	199.04	12.5893	-187.625	-202.895
2012-12-21 08:18:40	182.44	192.1	12.5962	-185.973	-195.821	2012-12-21 08:18:40
2012-12-21 08:28:40	183.8	197.07	12.6032	-187.36	-200.887
2012-12-21 08:38:40	184.06	198.69	12.6101	-187.625	-202.538
2012-12-21 08:48:40	184.16	199.1	12.6171	-187.727	-202.956
2012-12-21 08:58:40	184.27	199.26	12.624	-187.839	-203.119
2012-12-21 09:08:40	184.35	199.61	12.631	-187.92	-203.476
2012-12-21 09:18:40	184.42	199.76	12.6379	-187.992	-203.629	2012-12-21 09:18:40
2012-12-21 09:28:40	184.53	200.04	12.6449	-188.104	-203.914
2012-12-21 09:38:40	184.6	200.26	12.6518	-188.175	-204.139
2012-12-21 09:48:40	184.71	200.5	12.6587	-188.287	-204.383
2012-12-21 09:58:40	184.79	200.75	12.6657	-188.369	-204.638
2012-12-21 10:08:40	184.89	200.96	12.6726	-188.471	-204.852
2012-12-21 10:18:40	185	201.14	12.6796	-188.583	-205.036	2012-12-21 10:18:40
2012-12-21 10:28:40	185.08	201.43	12.6865	-188.665	-205.331
2012-12-21 10:38:40	185.18	201.66	12.6935	-188.767	-205.566
2012-12-21 10:48:40	185.27	201.91	12.7004	-188.858	-205.821
2012-12-21 10:58:40	185.35	202.13	12.7074	-188.94	-206.045
2012-12-21 11:08:40	185.47	202.34	12.7143	-189.062	-206.259
2012-12-21 11:18:40	185.56	202.55	12.7212	-189.154	-206.473	2012-12-21 11:18:40
2012-12-21 11:28:40	185.65	202.67	12.7282	-189.246	-206.595
2012-12-21 11:38:40	185.72	202.92	12.7351	-189.317	-206.85
2012-12-21 11:48:40	185.81	203.14	12.7421	-189.409	-207.074
2012-12-21 11:58:40	185.94	203.32	12.749	-189.541	-207.258
2012-12-21 12:08:40	186	203.58	12.756	-189.602	-207.523
2012-12-21 12:18:40	186.1	203.79	12.7629	-189.704	-207.737	2012-12-21 12:18:40
2012-12-21 12:28:40	186.18	204.07	12.7699	-189.786	-208.022
2012-12-21 12:38:40	186.28	204.31	12.7768	-189.888	-208.267
2012-12-21 12:48:40	186.35	204.51	12.7837	-189.959	-208.471
2012-12-21 12:58:40	186.44	204.73	12.7907	-190.051	-208.695
2012-12-21 13:08:40	186.53	204.95	12.7976	-190.143	-208.919
2012-12-21 13:18:40	186.61	205.16	12.8046	-190.224	-209.134	2012-12-21 13:18:40
2012-12-21 13:28:40	186.71	205.35	12.8115	-190.326	-209.327
2012-12-21 13:38:40	186.79	205.61	12.8185	-190.408	-209.592
2012-12-21 13:48:40	186.89	205.9	12.8254	-190.51	-209.888
2012-12-21 13:58:40	186.96	206.08	12.8324	-190.581	-210.071
2012-12-21 14:08:40	187.08	206.12	12.8393	-190.703	-210.112
2012-12-21 14:18:40	187.16	206.59	12.8462	-190.785	-210.591	2012-12-21 14:18:40
2012-12-21 14:28:40	187.24	206.8	12.8532	-190.866	-210.805
2012-12-21 14:38:40	187.34	207.02	12.8601	-190.968	-211.03
2012-12-21 14:48:40	187.43	207.29	12.8671	-191.06	-211.305
2012-12-21 14:58:40	187.51	207.51	12.874	-191.142	-211.529
2012-12-21 15:08:40	187.58	207.77	12.881	-191.213	-211.794
2012-12-21 15:18:40	187.7	207.99	12.8879	-191.335	-212.018	2012-12-21 15:18:40
2012-12-21 15:28:40	187.79	208.22	12.8949	-191.427	-212.253
2012-12-21 15:38:40	187.87	208.4	12.9018	-191.509	-212.436
2012-12-21 15:48:40	187.97	208.65	12.9087	-191.611	-212.691
2012-12-21 15:58:40	188.07	208.85	12.9157	-191.713	-212.895
2012-12-21 16:08:40	188.17	208.95	12.9226	-191.814	-212.997
2012-12-21 16:18:40	188.23	209.33	12.9296	-191.876	-213.384	2012-12-21 16:18:40
2012-12-21 16:28:40	188.36	209.57	12.9365	-192.008	-213.629
2012-12-21 16:38:40	188.44	209.82	12.9435	-192.09	-213.884
2012-12-21 16:48:40	188.53	210.04	12.9504	-192.181	-214.108
2012-12-21 16:58:40	188.61	210.15	12.9574	-192.263	-214.22
2012-12-21 17:08:40	188.72	210.42	12.9643	-192.375	-214.495
2012-12-21 17:18:40	188.79	210.78	12.9712	-192.446	-214.862	2012-12-21 17:18:40
2012-12-21 17:28:40	188.89	211.06	12.9782	-192.548	-215.148
2012-12-21 17:38:40	188.98	211.32	12.9851	-192.64	-215.413
2012-12-21 17:48:40	189.08	211.51	12.9921	-192.742	-215.607
2012-12-21 17:58:40	189.16	211.74	12.999	-192.824	-215.841
2012-12-21 18:08:40	189.26	212.02	13.006	-192.926	-216.126
2012-12-21 18:18:40	189.36	212.25	13.0129	-193.028	-216.361	2012-12-21 18:18:40
2012-12-21 18:28:40	189.45	212.37	13.0199	-193.119	-216.483
2012-12-21 18:38:40	188.91	210.12	13.0268	-192.569	-214.19
2012-12-21 18:48:40	189.41	212.16	13.0337	-193.078	-216.269
2012-12-21 18:58:40	189.58	212.76	13.0407	-193.252	-216.881
2012-12-21 19:08:40	189.68	213.13	13.0476	-193.354	-217.258
2012-12-21 19:18:40	189.8	213.44	13.0546	-193.476	-217.574	2012-12-21 19:18:40
2012-12-21 19:28:40	189.92	213.77	13.0615	-193.598	-217.91
2012-12-21 19:38:40	190.03	214.04	13.0685	-193.71	-218.186
2012-12-21 19:48:40	190.13	214.35	13.0754	-193.812	-218.502
2012-12-21 19:58:40	190.24	214.64	13.0824	-193.925	-218.797
2012-12-21 20:08:40	190.34	214.94	13.0893	-194.027	-219.103
2012-12-21 20:18:40	190.43	215.19	13.0962	-194.118	-219.358	2012-12-21 20:18:40
2012-12-21 20:28:40	190.53	215.44	13.1032	-194.22	-219.613
2012-12-21 20:38:40	190.62	215.75	13.1101	-194.312	-219.929
2012-12-21 20:48:40	190.74	215.95	13.1171	-194.434	-220.133
2012-12-21 20:58:40	190.84	216.2	13.124	-194.536	-220.387
[truncated: 1,393 more rows]

## Sheet: Tensi
Zeit [d]	MP bot(2) [cm]	MP top(1) [cm]		air entry bot		AE time	AE [cm]	Type	Pos	Weight
0.00767705	-3.56779	-6.09582		nan	8800	#VALUE!	-8970.44	1	2	1
0.0493437	-4.93374	-7.421
0.0910104	-5.83078	-8.30785		air entry top
0.132677	-6.7686	-9.26606		Time				Type	Pos	Weight
0.174344	-7.60449	-10.1121		2012-12-29 15:18:40	8800	20.8879	-8970.44	1	1	1
0.21601	-8.33843	-10.8665
0.257677	-9.07238	-11.6106
0.299344	-9.78593	-12.3038
0.34101	-10.0204	-12.5586
0.382677	-10.7339	-13.2722
0.424344	-10.7951	-13.3333
0.46601	-11.3252	-13.8328
0.507677	-11.1825	-13.7207
0.549344	-11.6106	-14.1488
0.59101	-11.8654	-14.3935
0.632677	-11.896	-14.4343
0.674344	-11.9776	-14.526
0.71601	-11.9674	-14.4852
0.757677	-11.7431	-14.3017
0.806288	-12.2834	-14.8216
0.847955	-12.5484	-15.0561
0.889621	-12.9154	-15.4434
0.931288	-11.8451	-14.3527
0.972955	-10.9888	-13.5066
1.01462	-12.3344	-14.8522
1.05629	-12.8033	-15.3211
1.09795	-12.9358	-15.4434
1.13962	-13.4455	-15.9531
1.18129	-13.7819	-16.2997
1.22295	-14.2406	-16.7482
1.26462	-14.4546	-16.9725
1.30629	-14.7706	-17.2987
1.34795	-14.9643	-17.4822
1.38962	-15.3721	-17.8797
1.43129	-15.0561	-17.5739
1.47295	-15.6779	-18.1855
1.51462	-15.9735	-18.4913
1.55629	-16.2691	-18.787
1.59795	-16.4424	-18.9602
1.63962	-16.6769	-19.1845
1.68129	-16.7074	-19.2049
1.72295	-16.8909	-19.368
1.76462	-17.1458	-19.6534
1.79833	-17.3496	-19.8573
1.8025	-17.2477	-19.7248
1.80666	-17.3394	-19.8369
1.81083	-17.3598	-19.8573
1.815	-17.3802	-19.8675
1.81916	-17.4108	-19.9083
1.82333	-17.421	-19.9185
1.8275	-17.4618	-19.949
1.83166	-17.4618	-19.949
1.83583	-17.4822	-19.9796
1.84625	-17.5637	-20.0408
1.88791	-17.8695	-20.3466
1.92958	-18.1346	-20.6218
1.97125	-18.3486	-20.8257
2.01291	-18.5729	-21.0703
2.05458	-18.7054	-21.213
2.09625	-18.9908	-21.4883
2.13791	-19.2253	-21.7227
2.17958	-19.5005	-21.998
2.22125	-19.2457	-21.7533
2.26291	-19.8165	-22.3445
2.30458	-20	-22.4975
2.34625	-20.2752	-22.7931
2.38791	-20.4995	-23.0173
2.42958	-20.7747	-23.2926
2.47125	-21.0092	-23.5168
2.51291	-21.2436	-23.7615
2.55458	-21.4883	-24.0061
2.59625	-21.7023	-24.1896
2.63791	-21.9572	-24.475
2.67958	-22.212	-24.7095
2.72125	-22.4261	-24.9235
2.76291	-22.4465	-24.9541
2.80458	-22.8033	-25.3007
2.84625	-23.0683	-25.5657
2.88791	-23.3639	-25.8308
2.92958	-23.5678	-26.0652
2.97125	-23.9042	-26.3812
3.01291	-23.7105	-26.1774
3.05458	-24.2202	-26.6871
3.09625	-24.5973	-27.0744
3.13791	-24.9643	-27.4312
3.17958	-25.2905	-27.7676
3.22125	-25.6065	-28.0836
3.26291	-25.9327	-28.3792
3.30458	-26.208	-28.6748
3.34625	-26.524	-28.9908
3.38791	-26.7686	-29.2457
3.42958	-27.0744	-29.5413
3.47125	-27.3394	-29.8063
3.51291	-27.5943	-30.0612
3.55458	-27.9103	-30.3772
3.59625	-28.1753	-30.6422
3.63791	-28.1855	-30.6524
3.67958	-28.6035	-31.0703
3.72125	-28.8175	-31.2946
3.76291	-29.0622	-31.5291
3.80458	-29.317	-31.7737
3.84625	-29.5821	-32.0591
3.88791	-29.8573	-32.3242
3.92958	-30.1019	-32.5586
3.97125	-30.3466	-32.8135
4.01291	-30.5097	-32.9867
4.05458	-30.7136	-33.1906
4.09625	-30.999	-33.4557
4.13791	-31.3048	-33.7819
4.17958	-31.58	-34.0469
4.22125	-31.7941	-34.261
4.26291	-32.0082	-34.4852
4.30458	-32.3242	-34.791
4.34625	-32.5484	-35.0153
4.38791	-32.7523	-35.2192
4.42958	-33.0071	-35.4842
4.47125	-33.3028	-35.7696
4.51291	-33.5168	-35.9939
4.55458	-33.8124	-36.2793
4.59625	-34.0877	-36.5647
4.63791	-34.3935	-36.84
4.67958	-34.5464	-37.0336
4.72125	-34.893	-37.3598
4.76291	-35.1988	-37.6758
4.80458	-35.474	-37.9511
4.84625	-35.5454	-37.9817
4.88791	-35.8614	-38.3078
4.92958	-36.157	-38.6137
4.97125	-36.5341	-38.9704
5.01291	-36.9521	-39.3884
5.05458	-37.2681	-39.7044
5.09625	-37.6351	-40.0815
5.13791	-37.9817	-40.4383
5.17958	-38.1142	-40.5607
5.22125	-38.5423	-40.999
5.26291	-38.8991	-41.3558
5.30458	-39.2762	-41.7227
5.34625	-39.6228	-42.0693
5.38791	-40	-42.4669
5.42958	-40.2854	-42.7523
5.47125	-40.6116	-43.0785
5.51291	-40.948	-43.4251
5.55458	-41.2334	-43.7105
5.59625	-41.4169	-43.8736
5.63791	-41.7227	-44.1896
5.67958	-41.9266	-44.4852
5.72125	-42.2426	-44.791
5.76291	-42.5382	-45.0866
5.80458	-42.8338	-45.3721
5.84625	-43.1295	-45.6881
5.88791	-43.4964	-46.0245
5.92958	-43.6595	-46.208
5.97125	-44.1794	-46.7176
6.01291	-44.5056	-47.0438
6.05458	-44.8012	-47.3496
6.09625	-44.9032	-47.3598
6.13791	-45.423	-47.8695
6.17958	-45.9327	-48.3894
6.22125	-46.371	-48.8379
6.26291	-46.7686	-49.2355
6.30458	-47.1865	-49.6636
6.34625	-47.5841	-50.0408
6.38791	-47.9918	-50.4689
6.42958	-48.369	-50.8563
6.47125	-48.7768	-51.2742
6.51291	-49.1131	-51.6106
6.55458	-49.4903	-51.9878
6.59625	-49.8267	-52.3344
6.63791	-50.2345	-52.7421
6.67958	-50.632	-53.1091
6.72125	-50.948	-53.4455
6.76291	-51.1519	-53.6493
6.80458	-51.5902	-54.0877
6.84625	-51.998	-54.4852
6.88791	-52.4363	-54.9134
6.92958	-52.9154	-55.4027
6.97125	-53.3537	-55.8614
7.01291	-53.8226	-56.3303
7.05458	-54.3323	-56.8298
7.09625	-54.791	-57.2579
7.13791	-55.2599	-57.7472
7.17958	-55.8206	-58.3282
7.22125	-56.3201	-58.8379
7.26291	-56.8603	-59.3782
7.30458	-57.4108	-59.9286
7.34625	-57.9307	-60.4485
7.38791	-58.4811	-61.0092
7.42958	-59.0826	-61.58
7.47125	-59.6942	-62.1916
7.51291	-60.2345	-62.7523
7.55458	-60.8155	-63.3537
7.59625	-61.3965	-63.9144
7.63791	-61.9674	-64.526
7.67958	-62.5586	-65.107
7.72125	-63.1498	-65.6983
7.76291	-63.7309	-66.3405
7.80458	-64.4241	-66.9827
7.84625	-65.0357	-67.5943
7.88791	-65.5046	-68.053
7.92958	-66.2895	-68.8379
7.97125	-67.0336	-69.5617
8.01291	-67.8389	-70.4077
8.05458	-68.6137	-71.1621
8.09625	-69.3782	-71.947
8.13791	-70.1631	-72.7217
8.17958	-70.9582	-73.5882
8.22125	-71.7941	-74.3731
8.26291	-72.6402	-75.2599
8.30458	-73.5066	-76.1264
8.34625	-74.3935	-77.0133
8.38791	-75.2803	-77.9205
8.42958	-76.1876	-78.8175
8.47125	-77.0438	-79.7146
8.51291	-77.9715	-80.6626
8.55458	-78.9704	-81.6514
8.59625	-80.0204	-82.7421
8.63791	-81.0499	-83.7513
8.67958	-82.0591	-84.842
8.72125	-82.6504	-85.423
8.76291	-83.9755	-86.6769
8.80458	-85.1886	-87.8899
8.84625	-86.3507	-89.0928
8.88791	-87.5229	-90.265
8.92958	-88.736	-91.4577
8.97125	-89.9185	-92.6809
9.01291	-91.1417	-93.9246
9.05458	-92.3649	-95.1682
9.09625	-93.6493	-96.473
9.13791	-94.9745	-97.7268
9.17958	-96.2997	-99.1845
9.22125	-97.6147	-100.53
9.26291	-98.9908	-101.916
9.30458	-100.377	-103.333
9.34625	-101.804	-104.73
9.38791	-103.293	-106.269
9.42958	-104.699	-107.757
9.47125	-106.086	-109.195
9.51291	-107.492	-110.622
9.55458	-108.95	-112.1
9.59625	-110.387	-113.619
9.63791	-111.825	-115.138
9.67958	-113.354	-116.677
9.72125	-114.913	-118.338
9.76291	-116.483	-119.929
9.80458	-118.033	-121.539
9.84625	-119.643	-123.221
9.88791	-121.274	-124.842
9.92958	-122.895	-126.687
9.97125	-124.312	-128.267
10.0129	-126.137	-129.969
10.0546	-127.788	-131.733
10.0962	-129.531	-133.537
10.1379	-131.203	-135.28
10.1796	-132.854	-136.972
10.2212	-134.526	-138.767
10.2629	-136.188	-140.52
10.3046	-137.819	-142.283
10.3462	-139.45	-144.016
10.3879	-141.101	-145.759
10.4296	-142.722	-147.523
10.4712	-144.332	-149.266
10.5129	-145.912	-150.907
10.5546	-147.39	-152.61
10.5962	-148.777	-154.22
10.6379	-150.459	-155.923
10.6796	-151.916	-157.503
10.7212	-153.282	-158.991
10.7629	-154.648	-160.438
10.8046	-155.943	-161.865
10.8462	-157.227	-163.231
10.8879	-158.451	-164.608
10.9296	-159.633	-165.831
10.9712	-160.52	-166.85
11.0129	-161.641	-168.094
11.0546	-162.773	-169.276
11.0962	-163.853	-170.428
11.1379	-164.893	-171.519
11.1796	-165.872	-172.538
11.2212	-166.799	-173.517
11.2629	-167.645	-174.404
11.3046	-168.512	-175.321
11.3462	-169.501	-176.402
11.3879	-170.296	-177.217
11.4296	-171.06	-178.012
11.4712	-171.794	-178.848
11.5129	-172.518	-179.602
11.5546	-173.17	-180.357
11.5962	-173.772	-181.019
11.6379	-174.139	-181.488
11.6796	-174.832	-182.202
11.7212	-175.331	-182.885
11.7629	-175.423	-183.028
11.8046	-175.882	-183.782
11.8462	-176.901	-184.964
11.8879	-177.655	-185.923
11.9296	-178.338	-186.82
11.9712	-179.032	-187.696
12.0129	-179.47	-188.41
12.0546	-180.102	-189.297
12.0962	-180.744	-190.234
12.1379	-181.366	-191.182
12.1796	-181.998	-192.13
12.2212	-182.599	-193.129
12.2629	-183.201	-194.118
12.3046	-183.772	-195.158
12.3462	-184.353	-196.167
12.3879	-184.883	-197.268
12.4296	-185.484	-198.41
12.4712	-186.065	-199.541
12.5129	-186.616	-200.765
12.5546	-187.187	-201.927
12.5962	-185.973	-195.821
12.6379	-187.992	-203.629
12.6796	-188.583	-205.036
12.7212	-189.154	-206.473
12.7629	-189.704	-207.737
12.8046	-190.224	-209.134
12.8462	-190.785	-210.591
12.8879	-191.335	-212.018
12.9296	-191.876	-213.384
12.9712	-192.446	-214.862
13.0129	-193.028	-216.361
13.0546	-193.476	-217.574
13.0962	-194.118	-219.358
13.1379	-194.689	-220.948
13.1796	-195.291	-222.446
13.2212	-195.861	-223.914
13.2629	-196.412	-225.382
13.3046	-196.972	-226.84
13.3462	-197.503	-228.522
13.3879	-198.033	-230.224
13.4296	-198.593	-231.774
13.4712	-199.134	-233.425
13.5129	-199.674	-235.056
13.5546	-200.183	-236.748
13.5962	-200.724	-238.512
13.6379	-201.254	-240.173
13.6796	-201.641	-241.458
13.7212	-202.212	-243.456
13.7629	-202.722	-245.321
13.8046	-203.201	-246.86
13.8462	-203.884	-249.001
13.8879	-204.393	-250.836
13.9296	-204.903	-252.559
13.9712	-205.423	-254.495
14.0129	-205.943	-256.381
14.0546	-206.565	-258.318
14.0962	-207.023	-259.898
14.1379	-207.655	-262.232
14.1796	-208.236	-264.373
14.2212	-208.797	-266.585
14.2629	-209.358	-268.624
14.3046	-209.888	-270.489
14.3462	-210.418	-272.487
14.3879	-210.928	-274.465
14.4296	-211.468	-276.595
14.4712	-211.988	-278.603
14.5129	-212.538	-280.561
14.5546	-213.099	-282.885
14.5962	-213.639	-284.883
14.6379	-212.681	-277.574
14.6796	-213.925	-286.34
14.7212	-214.608	-289.266
14.7629	-215.229	-291.855
14.8046	-215.759	-294.271
14.8462	-216.249	-296.534
14.8879	-216.687	-298.93
14.9296	-217.238	-301.101
14.9712	-217.778	-303.425
15.0129	-218.338	-306.035
15.0546	-218.848	-308.298
15.0962	-219.327	-310.591
15.1379	-219.796	-313.16
15.1796	-220.326	-315.525
15.2212	-220.836	-318.135
15.2629	-221.376	-320.765
15.3046	-221.937	-323.476
15.3462	-222.508	-326.33
15.3879	-223.099	-329.052
15.4296	-223.904	-332.712
15.4712	-224.465	-335.8
15.5129	-225.076	-339.113
15.5546	-225.657	-342.141
15.5962	-226.116	-345.443
15.6379	-226.85	-348.216
15.6796	-227.421	-351.814
15.7212	-227.971	-354.903
15.7629	-228.634	-358.257
15.8046	-229.246	-361.59
15.8462	-229.898	-365.209
15.8879	-230.601	-368.736
15.9296	-231.233	-371.967
15.9712	-231.835	-375.474
16.0129	-232.416	-378.96
16.0546	-233.058	-382.559
16.0962	-233.66	-386.371
16.1379	-234.332	-390.357
16.1796	-234.944	-394.037
16.2212	-235.576	-397.604
16.2629	-236.188	-401.386
16.3046	-236.82	-405.219
16.3462	-237.421	-409.185
16.3879	-238.084	-413.089
16.4296	-238.736	-417.655
16.4712	-239.388	-422.436
16.5129	-240.041	-426.656
16.5546	-240.673	-431.916
16.5962	-241.397	-437.462
16.6379	-242.069	-442.701
16.6796	-242.793	-447.625
16.7212	-243.486	-452.875
16.7629	-243.303	-468.135
16.8046	-244.669	-494.883
16.8462	-245.505	-507.197
16.8879	-246.208	-516.177
16.9296	-246.83	-525.107
16.9712	-247.92	-535.219
17.0129	-248.858	-544.404
17.0546	-249.735	-552.915
17.0962	-250.581	-561.284
17.1379	-251.386	-570.112
17.1796	-252.212	-580.173
17.2212	-252.977	-589.46
17.2629	-253.721	-597.839
17.3046	-254.485	-607.625
17.3462	-255.321	-617.686
17.3879	-256.126	-629.032
17.4296	-256.942	-639.602
17.4712	-257.768	-650.826
17.5129	-258.135	-662.243
17.5546	-259.368	-674.281
17.5962	-260.133	-687.482
17.6379	-261.131	-701.825
17.6796	-261.967	-716.504
17.7212	-262.844	-730.652
17.7629	-263.67	-744.74
17.8046	-264.597	-760.979
17.8462	-265.464	-777.523
17.8879	-265.698	-791.274
17.9296	-266.942	-813.129
17.9712	-267.982	-833.231
18.0129	-269.052	-854.108
18.0546	-270.041	-875.127
18.0962	-271.04	-898.349
18.1379	-272.345	-922.508
18.1796	-273.364	-946.045
18.2212	-274.373	-972.039
18.2629	-275.515	-998.186
18.3046	-276.422	-1024.07
18.3462	-277.523	-1053.71
18.3879	-278.389	-1082.21
18.4296	-279.368	-1112.09
18.4712	-280.398	-1145.78
18.5129	-281.366	-1178.85
18.5407	-282.049	-1203.76
18.5962	-283.466
18.6379	-284.475
18.6796	-285.81
18.7212	-286.891
18.7629	-285.168
18.8046	-288.838
18.8462	-290.163
18.8879	-291.539
18.9296	-292.844
18.9712	-294.077
19.0129	-287.085
19.0546	-296.3
19.0962	-297.859
19.1379	-298.96
19.1796	-300.561
19.2212	-301.978
19.2629	-303.333
19.3046	-304.811
19.3462	-306.442
19.3879	-307.961
19.4296	-309.684
19.4712	-311.009
19.5129	-312.844
19.5546	-314.465
19.5962	-316.228
19.6379	-317.931
19.6796	-318.461
19.7212	-321.233
19.7629	-323.344
19.8046	-325.28
19.8462	-327.054
19.8879	-328.828
19.9296	-330.754
19.9712	-332.762
20.0129	-334.72
20.0546	-336.534
20.0962	-338.777
20.1379	-340.785
20.1796	-342.732
20.2212	-344.811
20.2629	-346.809
20.3046	-348.818
20.3462	-350.907
20.3879	-352.875
20.4296	-354.852
20.4712	-357.013
20.5129	-359.358
20.5546	-361.682
20.5962	-363.986
20.6379	-351.172
20.6796	-367.523
20.7212	-371.978
20.7629	-375.199
20.8046	-377.91
20.8462	-380.54
20.8879	-383.782
20.9296	-386.565
20.9712	-389.786
21.0129	-392.936
21.0546	-396.29
21.0962	-399.735
21.1379	-403.14
21.1796	-406.565
21.2212	-410.265
21.2629	-413.863
21.3046	-417.604
21.3462	-421.203
21.3879	-425.189
21.4296	-428.726
21.4712	-432.803
21.5129	-436.616
21.5546	-440.489
21.5962	-444.75
21.6379	-448.767
21.6796	-453.15
21.7212	-457.604
21.7629	-462.538
21.8046	-467.034
21.8462	-471.784
21.8879	-476.789
21.9296	-482.212
21.9712	-487.533
22.0129	-492.905
22.0546	-498.43
22.0962	-503.812
22.1379	-509.735
22.1796	-515.331
22.2212	-520.591
22.2629	-526.473
22.3046	-532.793
22.3462	-538.818
22.3879	-545.494
22.4296	-551.855
22.4712	-558.726
22.5129	-565.78
22.5546	-572.589
22.5962	-579.766
22.6379	-586.932
22.6796	-594.108
22.7212	-602.029
22.7629	-609.929

## Sheet: HYDRUS
Data für die Zielfunktion: 2 x Tensionen, 1 x Endwassergehalt						Verdunstungsrate
Time	Obs	Type	Pos	Weight		Zeitintervall		Evarate [cm/d]			Type	1-Tension	2-Wassergehalt
0.00767705	-3.56779	1	2	1		0.745413	0	0.396938			Pos	1-top	2-bot	(von oben nach unten)
0.0493437	-4.93374	1	2	1		1.07445	0	0.373637			35	Time-Variable boundary conditions+
0.0910104	-5.83078	1	2	1		1.6418	0	0.349063			22.766	Final Time	Time Information
0.132677	-6.7686	1	2	1		1.98676	0	0.302961			1047	Number of Data Points in Objective Function			22.7649
0.174344	-7.60449	1	2	1		2.21597	0	0.299401		Interpolated Values	-5.19535	BC-top	[hPa]
0.21601	-8.33843	1	2	1		2.74645	0	0.304944			-3.94535	MP_top_ini	[hPa]	1
0.257677	-9.07238	1	2	1		2.97844	0	0.30343			-0.940528	MP_bot_ini	[hPa]	2
0.299344	-9.78593	1	2	1		3.64082	0	0.350488			0.309472	BC-bot	[hPa]
0.34101	-10.0204	1	2	1		3.97954	0	0.335168
0.382677	-10.7339	1	2	1		4.66299	0	0.30296
0.424344	-10.7951	1	2	1		5.16584	0	0.30961
0.46601	-11.3252	1	2	1		5.6398	0	0.29828		Real Values	-7.27446	BC-top	[cm]
0.507677	-11.1825	1	2	1		6.08383	0	0.281293			-6.02446	MP_top_ini	[cm]
0.549344	-11.6106	1	2	1		6.74155	0	0.269796			-3.43527	MP_bot_ini	[cm]
0.59101	-11.8654	1	2	1		7.86248	0	0.250143			-2.18527	BC-bot	[cm]
0.632677	-11.896	1	2	1		8.62633	0	0.245658
0.674344	-11.9776	1	2	1		9.60445	0	0.23655
0.71601	-11.9674	1	2	1		9.93538	0	0.236998
0.757677	-11.7431	1	2	1		10.589	0	0.232485
0.806288	-12.2834	1	2	1		10.9456	0	0.237581
0.847955	-12.5484	1	2	1		11.6001	0	0.216576
0.889621	-12.9154	1	2	1		11.9742	0	0.208607					-3.43527	-6.02446
0.931288	-11.8451	1	2	1		12.5935	0	0.177619
0.972955	-10.9888	1	2	1		13.0211	0	0.165099
1.01462	-12.3344	1	2	1		13.66	0	0.147911
1.05629	-12.8033	1	2	1		14.0551	0	0.131042
1.09795	-12.9358	1	2	1		14.616	0	0.116399
1.13962	-13.4455	1	2	1		16.7397	0	0.0931605
1.18129	-13.7819	1	2	1		17.8609	0	0.0832449
1.22295	-14.2406	1	2	1		18.7508	0	0.0779978
1.26462	-14.4546	1	2	1		19.0095	0	0.0750422
1.30629	-14.7706	1	2	1		19.6563	0	0.0760922
1.34795	-14.9643	1	2	1		20.6362	0	0.072237
1.38962	-15.3721	1	2	1		20.6528	0	0.0470685
1.43129	-15.0561	1	2	1		22.766	0	0.063223
1.47295	-15.6779	1	2	1
1.51462	-15.9735	1	2	1
1.55629	-16.2691	1	2	1
1.59795	-16.4424	1	2	1
1.63962	-16.6769	1	2	1
1.68129	-16.7074	1	2	1
1.72295	-16.8909	1	2	1
1.76462	-17.1458	1	2	1
1.79833	-17.3496	1	2	1
1.8025	-17.2477	1	2	1
1.80666	-17.3394	1	2	1
1.81083	-17.3598	1	2	1
1.815	-17.3802	1	2	1
1.81916	-17.4108	1	2	1
1.82333	-17.421	1	2	1
1.8275	-17.4618	1	2	1
1.83166	-17.4618	1	2	1
1.83583	-17.4822	1	2	1
1.84625	-17.5637	1	2	1
1.88791	-17.8695	1	2	1
1.92958	-18.1346	1	2	1
1.97125	-18.3486	1	2	1
2.01291	-18.5729	1	2	1
2.05458	-18.7054	1	2	1
2.09625	-18.9908	1	2	1
2.13791	-19.2253	1	2	1
2.17958	-19.5005	1	2	1
2.22125	-19.2457	1	2	1
2.26291	-19.8165	1	2	1
2.30458	-20	1	2	1
2.34625	-20.2752	1	2	1
2.38791	-20.4995	1	2	1
2.42958	-20.7747	1	2	1
2.47125	-21.0092	1	2	1
2.51291	-21.2436	1	2	1
2.55458	-21.4883	1	2	1
2.59625	-21.7023	1	2	1
2.63791	-21.9572	1	2	1
2.67958	-22.212	1	2	1
2.72125	-22.4261	1	2	1
2.76291	-22.4465	1	2	1
2.80458	-22.8033	1	2	1
2.84625	-23.0683	1	2	1
2.88791	-23.3639	1	2	1
2.92958	-23.5678	1	2	1
2.97125	-23.9042	1	2	1
3.01291	-23.7105	1	2	1
3.05458	-24.2202	1	2	1
3.09625	-24.5973	1	2	1
3.13791	-24.9643	1	2	1
3.17958	-25.2905	1	2	1
3.22125	-25.6065	1	2	1
3.26291	-25.9327	1	2	1
3.30458	-26.208	1	2	1
3.34625	-26.524	1	2	1
3.38791	-26.7686	1	2	1
3.42958	-27.0744	1	2	1
3.47125	-27.3394	1	2	1
3.51291	-27.5943	1	2	1
3.55458	-27.9103	1	2	1
3.59625	-28.1753	1	2	1
3.63791	-28.1855	1	2	1
3.67958	-28.6035	1	2	1
3.72125	-28.8175	1	2	1
3.76291	-29.0622	1	2	1
3.80458	-29.317	1	2	1
3.84625	-29.5821	1	2	1
3.88791	-29.8573	1	2	1
3.92958	-30.1019	1	2	1
3.97125	-30.3466	1	2	1
4.01291	-30.5097	1	2	1
4.05458	-30.7136	1	2	1
4.09625	-30.999	1	2	1
4.13791	-31.3048	1	2	1
4.17958	-31.58	1	2	1
4.22125	-31.7941	1	2	1
4.26291	-32.0082	1	2	1
4.30458	-32.3242	1	2	1
4.34625	-32.5484	1	2	1
4.38791	-32.7523	1	2	1
4.42958	-33.0071	1	2	1
4.47125	-33.3028	1	2	1
4.51291	-33.5168	1	2	1
4.55458	-33.8124	1	2	1
4.59625	-34.0877	1	2	1
4.63791	-34.3935	1	2	1
4.67958	-34.5464	1	2	1
4.72125	-34.893	1	2	1
4.76291	-35.1988	1	2	1
4.80458	-35.474	1	2	1
4.84625	-35.5454	1	2	1
4.88791	-35.8614	1	2	1
4.92958	-36.157	1	2	1
4.97125	-36.5341	1	2	1
5.01291	-36.9521	1	2	1
5.05458	-37.2681	1	2	1
5.09625	-37.6351	1	2	1
5.13791	-37.9817	1	2	1
5.17958	-38.1142	1	2	1
5.22125	-38.5423	1	2	1
5.26291	-38.8991	1	2	1
5.30458	-39.2762	1	2	1
5.34625	-39.6228	1	2	1
5.38791	-40	1	2	1
5.42958	-40.2854	1	2	1
5.47125	-40.6116	1	2	1
5.51291	-40.948	1	2	1
5.55458	-41.2334	1	2	1
5.59625	-41.4169	1	2	1
5.63791	-41.7227	1	2	1
5.67958	-41.9266	1	2	1
5.72125	-42.2426	1	2	1
5.76291	-42.5382	1	2	1
5.80458	-42.8338	1	2	1
5.84625	-43.1295	1	2	1
5.88791	-43.4964	1	2	1
5.92958	-43.6595	1	2	1
5.97125	-44.1794	1	2	1
6.01291	-44.5056	1	2	1
6.05458	-44.8012	1	2	1
6.09625	-44.9032	1	2	1
6.13791	-45.423	1	2	1
6.17958	-45.9327	1	2	1
6.22125	-46.371	1	2	1
6.26291	-46.7686	1	2	1
6.30458	-47.1865	1	2	1
6.34625	-47.5841	1	2	1
6.38791	-47.9918	1	2	1
6.42958	-48.369	1	2	1
6.47125	-48.7768	1	2	1
6.51291	-49.1131	1	2	1
6.55458	-49.4903	1	2	1
6.59625	-49.8267	1	2	1
6.63791	-50.2345	1	2	1
6.67958	-50.632	1	2	1
6.72125	-50.948	1	2	1
6.76291	-51.1519	1	2	1
6.80458	-51.5902	1	2	1
6.84625	-51.998	1	2	1
6.88791	-52.4363	1	2	1
6.92958	-52.9154	1	2	1
6.97125	-53.3537	1	2	1
7.01291	-53.8226	1	2	1
7.05458	-54.3323	1	2	1
7.09625	-54.791	1	2	1
7.13791	-55.2599	1	2	1
7.17958	-55.8206	1	2	1
7.22125	-56.3201	1	2	1
7.26291	-56.8603	1	2	1
7.30458	-57.4108	1	2	1
7.34625	-57.9307	1	2	1
7.38791	-58.4811	1	2	1
7.42958	-59.0826	1	2	1
7.47125	-59.6942	1	2	1
7.51291	-60.2345	1	2	1
7.55458	-60.8155	1	2	1
7.59625	-61.3965	1	2	1
7.63791	-61.9674	1	2	1
7.67958	-62.5586	1	2	1
7.72125	-63.1498	1	2	1
7.76291	-63.7309	1	2	1
7.80458	-64.4241	1	2	1
7.84625	-65.0357	1	2	1
7.88791	-65.5046	1	2	1
7.92958	-66.2895	1	2	1
7.97125	-67.0336	1	2	1
8.01291	-67.8389	1	2	1
8.05458	-68.6137	1	2	1
8.09625	-69.3782	1	2	1
8.13791	-70.1631	1	2	1
8.17958	-70.9582	1	2	1
8.22125	-71.7941	1	2	1
8.26291	-72.6402	1	2	1
8.30458	-73.5066	1	2	1
8.34625	-74.3935	1	2	1
8.38791	-75.2803	1	2	1
8.42958	-76.1876	1	2	1
8.47125	-77.0438	1	2	1
8.51291	-77.9715	1	2	1
8.55458	-78.9704	1	2	1
8.59625	-80.0204	1	2	1
8.63791	-81.0499	1	2	1
8.67958	-82.0591	1	2	1
8.72125	-82.6504	1	2	1
8.76291	-83.9755	1	2	1
8.80458	-85.1886	1	2	1
8.84625	-86.3507	1	2	1
8.88791	-87.5229	1	2	1
8.92958	-88.736	1	2	1
8.97125	-89.9185	1	2	1
9.01291	-91.1417	1	2	1
9.05458	-92.3649	1	2	1
9.09625	-93.6493	1	2	1
9.13791	-94.9745	1	2	1
9.17958	-96.2997	1	2	1
9.22125	-97.6147	1	2	1
9.26291	-98.9908	1	2	1
9.30458	-100.377	1	2	1
9.34625	-101.804	1	2	1
9.38791	-103.293	1	2	1
9.42958	-104.699	1	2	1
9.47125	-106.086	1	2	1
9.51291	-107.492	1	2	1
9.55458	-108.95	1	2	1
9.59625	-110.387	1	2	1
9.63791	-111.825	1	2	1
9.67958	-113.354	1	2	1
9.72125	-114.913	1	2	1
9.76291	-116.483	1	2	1
9.80458	-118.033	1	2	1
9.84625	-119.643	1	2	1
9.88791	-121.274	1	2	1
9.92958	-122.895	1	2	1
9.97125	-124.312	1	2	1
10.0129	-126.137	1	2	1
10.0546	-127.788	1	2	1
10.0962	-129.531	1	2	1
10.1379	-131.203	1	2	1
10.1796	-132.854	1	2	1
10.2212	-134.526	1	2	1
10.2629	-136.188	1	2	1
10.3046	-137.819	1	2	1
10.3462	-139.45	1	2	1
10.3879	-141.101	1	2	1
10.4296	-142.722	1	2	1
10.4712	-144.332	1	2	1
10.5129	-145.912	1	2	1
10.5546	-147.39	1	2	1
10.5962	-148.777	1	2	1
10.6379	-150.459	1	2	1
10.6796	-151.916	1	2	1
10.7212	-153.282	1	2	1
10.7629	-154.648	1	2	1
10.8046	-155.943	1	2	1
10.8462	-157.227	1	2	1
10.8879	-158.451	1	2	1
10.9296	-159.633	1	2	1
10.9712	-160.52	1	2	1
11.0129	-161.641	1	2	1
11.0546	-162.773	1	2	1
11.0962	-163.853	1	2	1
11.1379	-164.893	1	2	1
11.1796	-165.872	1	2	1
11.2212	-166.799	1	2	1
11.2629	-167.645	1	2	1
11.3046	-168.512	1	2	1
11.3462	-169.501	1	2	1
11.3879	-170.296	1	2	1
11.4296	-171.06	1	2	1
11.4712	-171.794	1	2	1
11.5129	-172.518	1	2	1
11.5546	-173.17	1	2	1
11.5962	-173.772	1	2	1
11.6379	-174.139	1	2	1
11.6796	-174.832	1	2	1
11.7212	-175.331	1	2	1
11.7629	-175.423	1	2	1
11.8046	-175.882	1	2	1
11.8462	-176.901	1	2	1
11.8879	-177.655	1	2	1
11.9296	-178.338	1	2	1
11.9712	-179.032	1	2	1
12.0129	-179.47	1	2	1
12.0546	-180.102	1	2	1
12.0962	-180.744	1	2	1
12.1379	-181.366	1	2	1
12.1796	-181.998	1	2	1
12.2212	-182.599	1	2	1
12.2629	-183.201	1	2	1
12.3046	-183.772	1	2	1
12.3462	-184.353	1	2	1
12.3879	-184.883	1	2	1
12.4296	-185.484	1	2	1
12.4712	-186.065	1	2	1
12.5129	-186.616	1	2	1
12.5546	-187.187	1	2	1
12.5962	-185.973	1	2	1
12.6379	-187.992	1	2	1
12.6796	-188.583	1	2	1
12.7212	-189.154	1	2	1
12.7629	-189.704	1	2	1
12.8046	-190.224	1	2	1
12.8462	-190.785	1	2	1
12.8879	-191.335	1	2	1
12.9296	-191.876	1	2	1
12.9712	-192.446	1	2	1
13.0129	-193.028	1	2	1
13.0546	-193.476	1	2	1
13.0962	-194.118	1	2	1
13.1379	-194.689	1	2	1
13.1796	-195.291	1	2	1
13.2212	-195.861	1	2	1
13.2629	-196.412	1	2	1
13.3046	-196.972	1	2	1
13.3462	-197.503	1	2	1
13.3879	-198.033	1	2	1
13.4296	-198.593	1	2	1
13.4712	-199.134	1	2	1
13.5129	-199.674	1	2	1
13.5546	-200.183	1	2	1
13.5962	-200.724	1	2	1
13.6379	-201.254	1	2	1
13.6796	-201.641	1	2	1
13.7212	-202.212	1	2	1
13.7629	-202.722	1	2	1
13.8046	-203.201	1	2	1
13.8462	-203.884	1	2	1
13.8879	-204.393	1	2	1
13.9296	-204.903	1	2	1
13.9712	-205.423	1	2	1
14.0129	-205.943	1	2	1
14.0546	-206.565	1	2	1
14.0962	-207.023	1	2	1
14.1379	-207.655	1	2	1
14.1796	-208.236	1	2	1
14.2212	-208.797	1	2	1
14.2629	-209.358	1	2	1
14.3046	-209.888	1	2	1
14.3462	-210.418	1	2	1
14.3879	-210.928	1	2	1
14.4296	-211.468	1	2	1
14.4712	-211.988	1	2	1
14.5129	-212.538	1	2	1
14.5546	-213.099	1	2	1
14.5962	-213.639	1	2	1
14.6379	-212.681	1	2	1
14.6796	-213.925	1	2	1
14.7212	-214.608	1	2	1
14.7629	-215.229	1	2	1
14.8046	-215.759	1	2	1
14.8462	-216.249	1	2	1
14.8879	-216.687	1	2	1
14.9296	-217.238	1	2	1
14.9712	-217.778	1	2	1
15.0129	-218.338	1	2	1
15.0546	-218.848	1	2	1
15.0962	-219.327	1	2	1
15.1379	-219.796	1	2	1
15.1796	-220.326	1	2	1
15.2212	-220.836	1	2	1
15.2629	-221.376	1	2	1
15.3046	-221.937	1	2	1
15.3462	-222.508	1	2	1
15.3879	-223.099	1	2	1
15.4296	-223.904	1	2	1
15.4712	-224.465	1	2	1
15.5129	-225.076	1	2	1
15.5546	-225.657	1	2	1
15.5962	-226.116	1	2	1
15.6379	-226.85	1	2	1
15.6796	-227.421	1	2	1
15.7212	-227.971	1	2	1
15.7629	-228.634	1	2	1
15.8046	-229.246	1	2	1
15.8462	-229.898	1	2	1
15.8879	-230.601	1	2	1
15.9296	-231.233	1	2	1
15.9712	-231.835	1	2	1
16.0129	-232.416	1	2	1
16.0546	-233.058	1	2	1
16.0962	-233.66	1	2	1
16.1379	-234.332	1	2	1
16.1796	-234.944	1	2	1
16.2212	-235.576	1	2	1
16.2629	-236.188	1	2	1
16.3046	-236.82	1	2	1
16.3462	-237.421	1	2	1
16.3879	-238.084	1	2	1
16.4296	-238.736	1	2	1
16.4712	-239.388	1	2	1
16.5129	-240.041	1	2	1
16.5546	-240.673	1	2	1
16.5962	-241.397	1	2	1
16.6379	-242.069	1	2	1
16.6796	-242.793	1	2	1
16.7212	-243.486	1	2	1
16.7629	-243.303	1	2	1
16.8046	-244.669	1	2	1
16.8462	-245.505	1	2	1
16.8879	-246.208	1	2	1
16.9296	-246.83	1	2	1
16.9712	-247.92	1	2	1
17.0129	-248.858	1	2	1
17.0546	-249.735	1	2	1
17.0962	-250.581	1	2	1
17.1379	-251.386	1	2	1
17.1796	-252.212	1	2	1
17.2212	-252.977	1	2	1
17.2629	-253.721	1	2	1
17.3046	-254.485	1	2	1
17.3462	-255.321	1	2	1
17.3879	-256.126	1	2	1
17.4296	-256.942	1	2	1
17.4712	-257.768	1	2	1
17.5129	-258.135	1	2	1
17.5546	-259.368	1	2	1
17.5962	-260.133	1	2	1
17.6379	-261.131	1	2	1
17.6796	-261.967	1	2	1
17.7212	-262.844	1	2	1
17.7629	-263.67	1	2	1
17.8046	-264.597	1	2	1
17.8462	-265.464	1	2	1
17.8879	-265.698	1	2	1
17.9296	-266.942	1	2	1
17.9712	-267.982	1	2	1
18.0129	-269.052	1	2	1
18.0546	-270.041	1	2	1
18.0962	-271.04	1	2	1
18.1379	-272.345	1	2	1
18.1796	-273.364	1	2	1
18.2212	-274.373	1	2	1
18.2629	-275.515	1	2	1
18.3046	-276.422	1	2	1
18.3462	-277.523	1	2	1
18.3879	-278.389	1	2	1
18.4296	-279.368	1	2	1
18.4712	-280.398	1	2	1
18.5129	-281.366	1	2	1
18.5407	-282.049	1	2	1
18.5962	-283.466	1	2	1
18.6379	-284.475	1	2	1
18.6796	-285.81	1	2	1
18.7212	-286.891	1	2	1
18.7629	-285.168	1	2	1
18.8046	-288.838	1	2	1
18.8462	-290.163	1	2	1
18.8879	-291.539	1	2	1
18.9296	-292.844	1	2	1
18.9712	-294.077	1	2	1
19.0129	-287.085	1	2	1
19.0546	-296.3	1	2	1
19.0962	-297.859	1	2	1
19.1379	-298.96	1	2	1
19.1796	-300.561	1	2	1
19.2212	-301.978	1	2	1
19.2629	-303.333	1	2	1
19.3046	-304.811	1	2	1
19.3462	-306.442	1	2	1
19.3879	-307.961	1	2	1
19.4296	-309.684	1	2	1
19.4712	-311.009	1	2	1
19.5129	-312.844	1	2	1
19.5546	-314.465	1	2	1
19.5962	-316.228	1	2	1
19.6379	-317.931	1	2	1
19.6796	-318.461	1	2	1
19.7212	-321.233	1	2	1
19.7629	-323.344	1	2	1
19.8046	-325.28	1	2	1
19.8462	-327.054	1	2	1
19.8879	-328.828	1	2	1
19.9296	-330.754	1	2	1
19.9712	-332.762	1	2	1
20.0129	-334.72	1	2	1
20.0546	-336.534	1	2	1
20.0962	-338.777	1	2	1
20.1379	-340.785	1	2	1
20.1796	-342.732	1	2	1
20.2212	-344.811	1	2	1
20.2629	-346.809	1	2	1
20.3046	-348.818	1	2	1
20.3462	-350.907	1	2	1
20.3879	-352.875	1	2	1
20.4296	-354.852	1	2	1
20.4712	-357.013	1	2	1
20.5129	-359.358	1	2	1
20.5546	-361.682	1	2	1
20.5962	-363.986	1	2	1
20.6379	-351.172	1	2	1
20.6796	-367.523	1	2	1
20.7212	-371.978	1	2	1
20.7629	-375.199	1	2	1
20.8046	-377.91	1	2	1
20.8462	-380.54	1	2	1
20.8879	-383.782	1	2	1
20.9296	-386.565	1	2	1
20.9712	-389.786	1	2	1
21.0129	-392.936	1	2	1
21.0546	-396.29	1	2	1
21.0962	-399.735	1	2	1
21.1379	-403.14	1	2	1
21.1796	-406.565	1	2	1
21.2212	-410.265	1	2	1
21.2629	-413.863	1	2	1
21.3046	-417.604	1	2	1
21.3462	-421.203	1	2	1
21.3879	-425.189	1	2	1
21.4296	-428.726	1	2	1
21.4712	-432.803	1	2	1
21.5129	-436.616	1	2	1
21.5546	-440.489	1	2	1
21.5962	-444.75	1	2	1
21.6379	-448.767	1	2	1
21.6796	-453.15	1	2	1
21.7212	-457.604	1	2	1
21.7629	-462.538	1	2	1
21.8046	-467.034	1	2	1
21.8462	-471.784	1	2	1
21.8879	-476.789	1	2	1
21.9296	-482.212	1	2	1
21.9712	-487.533	1	2	1
22.0129	-492.905	1	2	1
22.0546	-498.43	1	2	1
22.0962	-503.812	1	2	1
22.1379	-509.735	1	2	1
22.1796	-515.331	1	2	1
22.2212	-520.591	1	2	1
22.2629	-526.473	1	2	1
22.3046	-532.793	1	2	1
22.3462	-538.818	1	2	1
22.3879	-545.494	1	2	1
22.4296	-551.855	1	2	1
22.4712	-558.726	1	2	1
22.5129	-565.78	1	2	1
22.5546	-572.589	1	2	1
22.5962	-579.766	1	2	1
22.6379	-586.932	1	2	1
22.6796	-594.108	1	2	1
22.7212	-602.029	1	2	1
22.7629	-609.929	1	2	1
0.00767705	-6.09582	1	1	1
0.0493437	-7.421	1	1	1
0.0910104	-8.30785	1	1	1
0.132677	-9.26606	1	1	1
0.174344	-10.1121	1	1	1
0.21601	-10.8665	1	1	1
0.257677	-11.6106	1	1	1
0.299344	-12.3038	1	1	1
0.34101	-12.5586	1	1	1
0.382677	-13.2722	1	1	1
0.424344	-13.3333	1	1	1
0.46601	-13.8328	1	1	1
0.507677	-13.7207	1	1	1
0.549344	-14.1488	1	1	1
0.59101	-14.3935	1	1	1
0.632677	-14.4343	1	1	1
0.674344	-14.526	1	1	1
0.71601	-14.4852	1	1	1
0.757677	-14.3017	1	1	1
0.806288	-14.8216	1	1	1
0.847955	-15.0561	1	1	1
0.889621	-15.4434	1	1	1
0.931288	-14.3527	1	1	1
0.972955	-13.5066	1	1	1
1.01462	-14.8522	1	1	1
1.05629	-15.3211	1	1	1
1.09795	-15.4434	1	1	1
1.13962	-15.9531	1	1	1
1.18129	-16.2997	1	1	1
1.22295	-16.7482	1	1	1
1.26462	-16.9725	1	1	1
1.30629	-17.2987	1	1	1
1.34795	-17.4822	1	1	1
1.38962	-17.8797	1	1	1
1.43129	-17.5739	1	1	1
1.47295	-18.1855	1	1	1
1.51462	-18.4913	1	1	1
1.55629	-18.787	1	1	1
1.59795	-18.9602	1	1	1
1.63962	-19.1845	1	1	1
1.68129	-19.2049	1	1	1
1.72295	-19.368	1	1	1
1.76462	-19.6534	1	1	1
1.79833	-19.8573	1	1	1
1.8025	-19.7248	1	1	1
1.80666	-19.8369	1	1	1
1.81083	-19.8573	1	1	1
1.815	-19.8675	1	1	1
1.81916	-19.9083	1	1	1
1.82333	-19.9185	1	1	1
1.8275	-19.949	1	1	1
1.83166	-19.949	1	1	1
1.83583	-19.9796	1	1	1
1.84625	-20.0408	1	1	1
1.88791	-20.3466	1	1	1
1.92958	-20.6218	1	1	1
1.97125	-20.8257	1	1	1
2.01291	-21.0703	1	1	1
2.05458	-21.213	1	1	1
2.09625	-21.4883	1	1	1
2.13791	-21.7227	1	1	1
2.17958	-21.998	1	1	1
2.22125	-21.7533	1	1	1
2.26291	-22.3445	1	1	1
2.30458	-22.4975	1	1	1
2.34625	-22.7931	1	1	1
2.38791	-23.0173	1	1	1
2.42958	-23.2926	1	1	1
2.47125	-23.5168	1	1	1
2.51291	-23.7615	1	1	1
2.55458	-24.0061	1	1	1
2.59625	-24.1896	1	1	1
2.63791	-24.475	1	1	1
2.67958	-24.7095	1	1	1
2.72125	-24.9235	1	1	1
2.76291	-24.9541	1	1	1
2.80458	-25.3007	1	1	1
2.84625	-25.5657	1	1	1
2.88791	-25.8308	1	1	1
2.92958	-26.0652	1	1	1
2.97125	-26.3812	1	1	1
3.01291	-26.1774	1	1	1
3.05458	-26.6871	1	1	1
3.09625	-27.0744	1	1	1
3.13791	-27.4312	1	1	1
3.17958	-27.7676	1	1	1
3.22125	-28.0836	1	1	1
3.26291	-28.3792	1	1	1
3.30458	-28.6748	1	1	1
3.34625	-28.9908	1	1	1
3.38791	-29.2457	1	1	1
3.42958	-29.5413	1	1	1
3.47125	-29.8063	1	1	1
3.51291	-30.0612	1	1	1
3.55458	-30.3772	1	1	1
3.59625	-30.6422	1	1	1
3.63791	-30.6524	1	1	1
3.67958	-31.0703	1	1	1
3.72125	-31.2946	1	1	1
3.76291	-31.5291	1	1	1
3.80458	-31.7737	1	1	1
3.84625	-32.0591	1	1	1
3.88791	-32.3242	1	1	1
3.92958	-32.5586	1	1	1
3.97125	-32.8135	1	1	1
4.01291	-32.9867	1	1	1
4.05458	-33.1906	1	1	1
4.09625	-33.4557	1	1	1
4.13791	-33.7819	1	1	1
4.17958	-34.0469	1	1	1
4.22125	-34.261	1	1	1
4.26291	-34.4852	1	1	1
4.30458	-34.791	1	1	1
4.34625	-35.0153	1	1	1
4.38791	-35.2192	1	1	1
4.42958	-35.4842	1	1	1
4.47125	-35.7696	1	1	1
4.51291	-35.9939	1	1	1
4.55458	-36.2793	1	1	1
4.59625	-36.5647	1	1	1
4.63791	-36.84	1	1	1
4.67958	-37.0336	1	1	1
4.72125	-37.3598	1	1	1
4.76291	-37.6758	1	1	1
4.80458	-37.9511	1	1	1
4.84625	-37.9817	1	1	1
4.88791	-38.3078	1	1	1
4.92958	-38.6137	1	1	1
4.97125	-38.9704	1	1	1
5.01291	-39.3884	1	1	1
5.05458	-39.7044	1	1	1
5.09625	-40.0815	1	1	1
5.13791	-40.4383	1	1	1
5.17958	-40.5607	1	1	1
5.22125	-40.999	1	1	1
5.26291	-41.3558	1	1	1
5.30458	-41.7227	1	1	1
5.34625	-42.0693	1	1	1
5.38791	-42.4669	1	1	1
5.42958	-42.7523	1	1	1
5.47125	-43.0785	1	1	1
5.51291	-43.4251	1	1	1
5.55458	-43.7105	1	1	1
5.59625	-43.8736	1	1	1
5.63791	-44.1896	1	1	1
5.67958	-44.4852	1	1	1
5.72125	-44.791	1	1	1
5.76291	-45.0866	1	1	1
5.80458	-45.3721	1	1	1
5.84625	-45.6881	1	1	1
5.88791	-46.0245	1	1	1
5.92958	-46.208	1	1	1
5.97125	-46.7176	1	1	1
6.01291	-47.0438	1	1	1
6.05458	-47.3496	1	1	1
6.09625	-47.3598	1	1	1
6.13791	-47.8695	1	1	1
6.17958	-48.3894	1	1	1
6.22125	-48.8379	1	1	1
6.26291	-49.2355	1	1	1
6.30458	-49.6636	1	1	1
6.34625	-50.0408	1	1	1
6.38791	-50.4689	1	1	1
6.42958	-50.8563	1	1	1
6.47125	-51.2742	1	1	1
6.51291	-51.6106	1	1	1
6.55458	-51.9878	1	1	1
6.59625	-52.3344	1	1	1
6.63791	-52.7421	1	1	1
6.67958	-53.1091	1	1	1
6.72125	-53.4455	1	1	1
6.76291	-53.6493	1	1	1
6.80458	-54.0877	1	1	1
6.84625	-54.4852	1	1	1
6.88791	-54.9134	1	1	1
6.92958	-55.4027	1	1	1
6.97125	-55.8614	1	1	1
7.01291	-56.3303	1	1	1
7.05458	-56.8298	1	1	1
7.09625	-57.2579	1	1	1
7.13791	-57.7472	1	1	1
7.17958	-58.3282	1	1	1
7.22125	-58.8379	1	1	1
7.26291	-59.3782	1	1	1
7.30458	-59.9286	1	1	1
7.34625	-60.4485	1	1	1
7.38791	-61.0092	1	1	1
7.42958	-61.58	1	1	1
7.47125	-62.1916	1	1	1
7.51291	-62.7523	1	1	1
7.55458	-63.3537	1	1	1
7.59625	-63.9144	1	1	1
7.63791	-64.526	1	1	1
7.67958	-65.107	1	1	1
7.72125	-65.6983	1	1	1
7.76291	-66.3405	1	1	1
7.80458	-66.9827	1	1	1
7.84625	-67.5943	1	1	1
7.88791	-68.053	1	1	1
7.92958	-68.8379	1	1	1
7.97125	-69.5617	1	1	1
8.01291	-70.4077	1	1	1
8.05458	-71.1621	1	1	1
8.09625	-71.947	1	1	1
8.13791	-72.7217	1	1	1
8.17958	-73.5882	1	1	1
8.22125	-74.3731	1	1	1
8.26291	-75.2599	1	1	1
8.30458	-76.1264	1	1	1
8.34625	-77.0133	1	1	1
8.38791	-77.9205	1	1	1
8.42958	-78.8175	1	1	1
8.47125	-79.7146	1	1	1
8.51291	-80.6626	1	1	1
8.55458	-81.6514	1	1	1
8.59625	-82.7421	1	1	1
8.63791	-83.7513	1	1	1
8.67958	-84.842	1	1	1
8.72125	-85.423	1	1	1
8.76291	-86.6769	1	1	1
8.80458	-87.8899	1	1	1
8.84625	-89.0928	1	1	1
8.88791	-90.265	1	1	1
8.92958	-91.4577	1	1	1
8.97125	-92.6809	1	1	1
9.01291	-93.9246	1	1	1
9.05458	-95.1682	1	1	1
9.09625	-96.473	1	1	1
9.13791	-97.7268	1	1	1
9.17958	-99.1845	1	1	1
9.22125	-100.53	1	1	1
9.26291	-101.916	1	1	1
9.30458	-103.333	1	1	1
9.34625	-104.73	1	1	1
9.38791	-106.269	1	1	1
9.42958	-107.757	1	1	1
9.47125	-109.195	1	1	1
9.51291	-110.622	1	1	1
9.55458	-112.1	1	1	1
9.59625	-113.619	1	1	1
9.63791	-115.138	1	1	1
9.67958	-116.677	1	1	1
9.72125	-118.338	1	1	1
9.76291	-119.929	1	1	1
9.80458	-121.539	1	1	1
9.84625	-123.221	1	1	1
9.88791	-124.842	1	1	1
9.92958	-126.687	1	1	1
9.97125	-128.267	1	1	1
10.0129	-129.969	1	1	1
10.0546	-131.733	1	1	1
10.0962	-133.537	1	1	1
10.1379	-135.28	1	1	1
10.1796	-136.972	1	1	1
10.2212	-138.767	1	1	1
10.2629	-140.52	1	1	1
10.3046	-142.283	1	1	1
10.3462	-144.016	1	1	1
10.3879	-145.759	1	1	1
10.4296	-147.523	1	1	1
10.4712	-149.266	1	1	1
10.5129	-150.907	1	1	1
10.5546	-152.61	1	1	1
10.5962	-154.22	1	1	1
10.6379	-155.923	1	1	1
10.6796	-157.503	1	1	1
10.7212	-158.991	1	1	1
10.7629	-160.438	1	1	1
10.8046	-161.865	1	1	1
10.8462	-163.231	1	1	1
10.8879	-164.608	1	1	1
10.9296	-165.831	1	1	1
10.9712	-166.85	1	1	1
11.0129	-168.094	1	1	1
11.0546	-169.276	1	1	1
11.0962	-170.428	1	1	1
11.1379	-171.519	1	1	1
11.1796	-172.538	1	1	1
11.2212	-173.517	1	1	1
11.2629	-174.404	1	1	1
11.3046	-175.321	1	1	1
11.3462	-176.402	1	1	1
11.3879	-177.217	1	1	1
11.4296	-178.012	1	1	1
11.4712	-178.848	1	1	1
11.5129	-179.602	1	1	1
11.5546	-180.357	1	1	1
11.5962	-181.019	1	1	1
11.6379	-181.488	1	1	1
11.6796	-182.202	1	1	1
11.7212	-182.885	1	1	1
11.7629	-183.028	1	1	1
11.8046	-183.782	1	1	1
11.8462	-184.964	1	1	1
11.8879	-185.923	1	1	1
11.9296	-186.82	1	1	1
11.9712	-187.696	1	1	1
12.0129	-188.41	1	1	1
12.0546	-189.297	1	1	1
12.0962	-190.234	1	1	1
12.1379	-191.182	1	1	1
12.1796	-192.13	1	1	1
12.2212	-193.129	1	1	1
12.2629	-194.118	1	1	1
12.3046	-195.158	1	1	1
12.3462	-196.167	1	1	1
12.3879	-197.268	1	1	1
12.4296	-198.41	1	1	1
12.4712	-199.541	1	1	1
12.5129	-200.765	1	1	1
12.5546	-201.927	1	1	1
12.5962	-195.821	1	1	1
12.6379	-203.629	1	1	1
12.6796	-205.036	1	1	1
12.7212	-206.473	1	1	1
12.7629	-207.737	1	1	1
12.8046	-209.134	1	1	1
12.8462	-210.591	1	1	1
12.8879	-212.018	1	1	1
12.9296	-213.384	1	1	1
12.9712	-214.862	1	1	1
13.0129	-216.361	1	1	1
13.0546	-217.574	1	1	1
13.0962	-219.358	1	1	1
13.1379	-220.948	1	1	1
13.1796	-222.446	1	1	1
13.2212	-223.914	1	1	1
13.2629	-225.382	1	1	1
13.3046	-226.84	1	1	1
13.3462	-228.522	1	1	1
13.3879	-230.224	1	1	1
13.4296	-231.774	1	1	1
13.4712	-233.425	1	1	1
13.5129	-235.056	1	1	1
13.5546	-236.748	1	1	1
13.5962	-238.512	1	1	1
13.6379	-240.173	1	1	1
13.6796	-241.458	1	1	1
13.7212	-243.456	1	1	1
13.7629	-245.321	1	1	1
13.8046	-246.86	1	1	1
13.8462	-249.001	1	1	1
13.8879	-250.836	1	1	1
13.9296	-252.559	1	1	1
13.9712	-254.495	1	1	1
14.0129	-256.381	1	1	1
14.0546	-258.318	1	1	1
14.0962	-259.898	1	1	1
14.1379	-262.232	1	1	1
14.1796	-264.373	1	1	1
14.2212	-266.585	1	1	1
14.2629	-268.624	1	1	1
14.3046	-270.489	1	1	1
14.3462	-272.487	1	1	1
14.3879	-274.465	1	1	1
14.4296	-276.595	1	1	1
14.4712	-278.603	1	1	1
14.5129	-280.561	1	1	1
14.5546	-282.885	1	1	1
14.5962	-284.883	1	1	1
14.6379	-277.574	1	1	1
14.6796	-286.34	1	1	1
14.7212	-289.266	1	1	1
14.7629	-291.855	1	1	1
14.8046	-294.271	1	1	1
14.8462	-296.534	1	1	1
14.8879	-298.93	1	1	1
14.9296	-301.101	1	1	1
14.9712	-303.425	1	1	1
15.0129	-306.035	1	1	1
15.0546	-308.298	1	1	1
15.0962	-310.591	1	1	1
15.1379	-313.16	1	1	1
15.1796	-315.525	1	1	1
15.2212	-318.135	1	1	1
15.2629	-320.765	1	1	1
15.3046	-323.476	1	1	1
15.3462	-326.33	1	1	1
15.3879	-329.052	1	1	1
15.4296	-332.712	1	1	1
15.4712	-335.8	1	1	1
15.5129	-339.113	1	1	1
15.5546	-342.141	1	1	1
15.5962	-345.443	1	1	1
15.6379	-348.216	1	1	1
15.6796	-351.814	1	1	1
15.7212	-354.903	1	1	1
15.7629	-358.257	1	1	1
15.8046	-361.59	1	1	1
15.8462	-365.209	1	1	1
15.8879	-368.736	1	1	1
15.9296	-371.967	1	1	1
15.9712	-375.474	1	1	1
16.0129	-378.96	1	1	1
16.0546	-382.559	1	1	1
16.0962	-386.371	1	1	1
16.1379	-390.357	1	1	1
16.1796	-394.037	1	1	1
16.2212	-397.604	1	1	1
16.2629	-401.386	1	1	1
16.3046	-405.219	1	1	1
16.3462	-409.185	1	1	1
16.3879	-413.089	1	1	1
16.4296	-417.655	1	1	1
16.4712	-422.436	1	1	1
16.5129	-426.656	1	1	1
16.5546	-431.916	1	1	1
16.5962	-437.462	1	1	1
16.6379	-442.701	1	1	1
16.6796	-447.625	1	1	1
16.7212	-452.875	1	1	1
16.7629	-468.135	1	1	1
16.8046	-494.883	1	1	1
16.8462	-507.197	1	1	1
16.8879	-516.177	1	1	1
16.9296	-525.107	1	1	1
16.9712	-535.219	1	1	1
17.0129	-544.404	1	1	1
17.0546	-552.915	1	1	1
17.0962	-561.284	1	1	1
17.1379	-570.112	1	1	1
17.1796	-580.173	1	1	1
17.2212	-589.46	1	1	1
17.2629	-597.839	1	1	1
17.3046	-607.625	1	1	1
17.3462	-617.686	1	1	1
17.3879	-629.032	1	1	1
17.4296	-639.602	1	1	1
17.4712	-650.826	1	1	1
17.5129	-662.243	1	1	1
17.5546	-674.281	1	1	1
17.5962	-687.482	1	1	1
17.6379	-701.825	1	1	1
17.6796	-716.504	1	1	1
17.7212	-730.652	1	1	1
17.7629	-744.74	1	1	1
17.8046	-760.979	1	1	1
17.8462	-777.523	1	1	1
17.8879	-791.274	1	1	1
17.9296	-813.129	1	1	1
17.9712	-833.231	1	1	1
18.0129	-854.108	1	1	1
18.0546	-875.127	1	1	1
18.0962	-898.349	1	1	1
18.1379	-922.508	1	1	1
18.1796	-946.045	1	1	1
18.2212	-972.039	1	1	1
18.2629	-998.186	1	1	1
18.3046	-1024.07	1	1	1
18.3462	-1053.71	1	1	1
18.3879	-1082.21	1	1	1
18.4296	-1112.09	1	1	1
18.4712	-1145.78	1	1	1
18.5129	-1178.85	1	1	1
18.5407	-1203.76	1	1	1
20.8879	-8970.44	1	1	1
0.745413	0.907804	2	0	100000
1.07445	0.883216	2	0	100000
1.6418	0.843608	2	0	100000
1.98676	0.822706	2	0	100000
2.21597	0.80898	2	0	100000
2.74645	0.776627	2	0	100000
2.97844	0.762549	2	0	100000
3.64082	0.716118	2	0	100000
3.97954	0.693412	2	0	100000
4.66299	0.652	2	0	100000
5.16584	0.620863	2	0	100000
5.6398	0.592588	2	0	100000
6.08383	0.567608	2	0	100000
6.74155	0.532118	2	0	100000
7.86248	0.476039	2	0	100000
8.62633	0.43851	2	0	100000
9.60445	0.392235	2	0	100000
9.93538	0.376549	2	0	100000
10.589	0.346157	2	0	100000
10.9456	0.329216	2	0	100000
11.6001	0.300863	2	0	100000
11.9742	0.285255	2	0	100000
12.5935	0.263255	2	0	100000
13.0211	0.249137	2	0	100000
13.66	0.230235	2	0	100000
14.0551	0.219882	2	0	100000
14.616	0.206824	2	0	100000
16.7397	0.167255	2	0	100000
17.8609	0.148588	2	0	100000
18.7508	0.134706	2	0	100000
19.0095	0.130824	2	0	100000
19.6563	0.12098	2	0	100000
20.6362	0.106824	2	0	100000
20.6528	0.106667	2	0	100000
22.7649	0.0799608	2	0	100000

## Sheet: tens_interpolation
		Datum / Zeit	Tension unten [hPa]	Tension oben [hPa]
m_bot	b_bot	2013-07-31 15:49:15	0.65	3.59
82.8	-3.43509e+06	2013-07-31 16:09:15	1.8	4.76
m_top	b_top	2013-07-31 15:53:59	0.921717	3.86644
84.24	-3.49483e+06	y = m*x+b
		AE unten [t]	AE oben [t]
		41227.2
			Brutto-Gewicht [g]	Netto-Gewicht [g]
-1.40314	58626.9	2013-08-23 17:58:52	382.99	12.72
		2013-08-24 10:54:53	382	11.73
-1.40314	58256.7	2013-08-24 06:49:00	382.24	11.9696
			AE unten
m_bot	b_bot	2012-11-12 09:52:24	595.08	28.48
-3.5343	146298	2012-11-15 10:52:20	584.33	17.73
m_top	b_top	2012-11-16 08:39:32	581.122	14.5216
-3.5343	145731	y = m*x+b
