# Supplementary material for: A pore-size classification for peat bogs derived from unsaturated hydraulic properties
Source: Copernicus journal article supplement (doi:10.5194/hess-21-6185-2017), 2017-12-07
Supplement: Supplementary file 16 [file A322_5_HYDRUS.xlsx]

## Sheet: Evap_Theta
Zeit [d]	cum. Verdunstung [cm]	Evarate [cm/d]	Theta [-]			Anfangswassergehalt	0.961396
0.744594	0.333263	0.447577	0.894743			Volumen	237.8
1.07399	0.461312	0.388741	0.869134			Höhe	5
1.64119	0.67704	0.380335	0.825988
1.98593	0.792473	0.334839	0.802902
2.21518	0.870269	0.339353	0.787342
2.74623	1.05404	0.346051	0.750589
2.97762	1.13625	0.355293	0.734146
3.63956	1.35156	0.325266	0.691085
3.97789	1.46341	0.330622	0.668713
4.66176	1.68167	0.319142	0.625063
5.165	1.85934	0.353047	0.589529
5.63897	2.03028	0.360665	0.555341
6.08366	2.17368	0.322467	0.526661
6.73992	2.37174	0.301811	0.487048
7.86104	2.67431	0.269876	0.426535
8.62575	2.87763	0.265883	0.38587
9.60266	3.13394	0.262365	0.334609
9.93506	3.21278	0.237204	0.318839
10.5888	3.35093	0.211321	0.291211
10.9451	3.42157	0.198242	0.277082
11.5998	3.53469	0.172783	0.254458
11.9738	3.60008	0.174852	0.241379
12.5932	3.69828	0.158526	0.221741
13.0198	3.76346	0.152781	0.208705
13.6586	3.85366	0.141224	0.190664
14.0538	3.90496	0.129807	0.180404
14.6147	3.97014	0.116196	0.167368
16.7411	4.17241	0.0951256	0.126913
17.8618	4.26451	0.0821767	0.108495
18.7518	4.33284	0.0767818	0.0948276
19.0072	4.35198	0.0749217	0.0910008
19.6538	4.39929	0.0731589	0.0815391

## Sheet: Tensi
Zeit [d]	MP [cm]	MP [cm]		Time	Obs	Type	Pos	Weight
0	-1.30479	-3.88379		0.0423611	-1.43731	1	2	1		925
0.0423611	-1.43731	-3.96534		0.0840278	-1.67176	1	2	1		19.6538		-5.46534
0.0840278	-1.67176	-4.1998		0.125694	-2.17125	1	2	1				-3.96534
0.125694	-2.17125	-4.71967		0.167361	-2.80326	1	2	1				-1.43731
0.167361	-2.80326	-5.34149		0.209028	-2.95617	1	2	1				0.0626911
0.209028	-2.95617	-5.50459		0.250694	-3.74108	1	2	1
0.250694	-3.74108	-6.29969		0.292361	-4.14883	1	2	1
0.292361	-4.14883	-6.70744		0.334028	-4.68909	1	2	1
0.334028	-4.68909	-7.24771		0.375694	-5.30071	1	2	1
0.375694	-5.30071	-7.86952		0.417361	-5.92253	1	2	1
0.417361	-5.92253	-8.50153		0.459028	-6.57492	1	2	1
0.459028	-6.57492	-9.14373		0.500694	-7.11519	1	2	1
0.500694	-7.11519	-9.69419		0.542361	-7.2579	1	2	1
0.542361	-7.2579	-9.8369		0.584028	-7.98165	1	2	1
0.584028	-7.98165	-10.581		0.625694	-8.32824	1	2	1
0.625694	-8.32824	-10.9276		0.667361	-8.83792	1	2	1
0.667361	-8.83792	-11.4475		0.709028	-9.23547	1	2	1
0.709028	-9.23547	-11.8043		0.750694	-8.62385	1	2	1
0.750694	-8.62385	-11.2029		0.792361	-9.76555	1	2	1
0.792361	-9.76555	-12.3547		0.834028	-10.3058	1	2	1
0.834028	-10.3058	-12.895		0.882639	-10.7951	1	2	1
0.882639	-10.7951	-13.3843		0.93125	-11.0703	1	2	1
0.93125	-11.0703	-13.6697		0.972917	-10.632	1	2	1
0.972917	-10.632	-13.2212		1.01458	-11.58	1	2	1
1.01458	-11.58	-14.1488		1.05625	-12.0489	1	2	1
1.05625	-12.0489	-14.6279		1.09792	-12.2936	1	2	1
1.09792	-12.2936	-14.9032		1.13958	-12.7217	1	2	1
1.13958	-12.7217	-15.3211		1.18125	-13.1397	1	2	1
1.18125	-13.1397	-15.7492		1.22292	-13.578	1	2	1
1.22292	-13.578	-16.1978		1.26458	-13.9653	1	2	1
1.26458	-13.9653	-16.5851		1.30625	-14.3833	1	2	1
1.30625	-14.3833	-17.0031		1.34792	-14.7808	1	2	1
1.34792	-14.7808	-17.3904		1.38958	-15.1478	1	2	1
1.38958	-15.1478	-17.7676		1.43125	-15.5148	1	2	1
1.43125	-15.5148	-18.1346		1.47292	-15.8919	1	2	1
1.47292	-15.8919	-18.5219		1.51458	-16.2997	1	2	1
1.51458	-16.2997	-18.9195		1.55625	-16.473	1	2	1
1.55625	-16.473	-19.103		1.59792	-16.8807	1	2	1
1.59792	-16.8807	-19.5107		1.63958	-17.2069	1	2	1
1.63958	-17.2069	-19.8267		1.68125	-17.421	1	2	1
1.68125	-17.421	-20.0408		1.72292	-17.6656	1	2	1
1.72292	-17.6656	-20.3058		1.76458	-18.0734	1	2	1
1.76458	-18.0734	-20.7034		1.79829	-18.2875	1	2	1
1.79829	-18.2875	-20.9276		1.80246	-18.3384	1	2	1
1.80246	-18.3384	-20.948		1.80662	-18.2875	1	2	1
1.80662	-18.2875	-20.9174		1.81079	-18.369	1	2	1
1.81079	-18.369	-20.999		1.81496	-18.3486	1	2	1
1.81496	-18.3486	-20.9684		1.81912	-18.2671	1	2	1
1.81912	-18.2671	-20.897		1.82329	-18.318	1	2	1
1.82329	-18.318	-20.9174		1.82746	-18.3792	1	2	1
1.82746	-18.3792	-20.999		1.83162	-18.3996	1	2	1
1.83162	-18.3996	-21.0296		1.83579	-18.4608	1	2	1
1.83579	-18.4608	-21.0907		1.84621	-18.5321	1	2	1
1.84621	-18.5321	-21.1723		1.88787	-18.9704	1	2	1
1.88787	-18.9704	-21.6004		1.92954	-19.2661	1	2	1
1.92954	-19.2661	-21.896		1.97121	-19.6636	1	2	1
1.97121	-19.6636	-22.2936		2.01287	-19.7757	1	2	1
2.01287	-19.7757	-22.4057		2.05454	-20.1019	1	2	1
2.05454	-20.1019	-22.7319		2.09621	-20.5199	1	2	1
2.09621	-20.5199	-23.16		2.13787	-20.8665	1	2	1
2.13787	-20.8665	-23.5066		2.17954	-21.2232	1	2	1
2.17954	-21.2232	-23.8532		2.22121	-21.1417	1	2	1
2.22121	-21.1417	-23.7717		2.26287	-21.7941	1	2	1
2.26287	-21.7941	-24.4241		2.30454	-22.1509	1	2	1
2.30454	-22.1509	-24.7706		2.34621	-22.5382	1	2	1
2.34621	-22.5382	-25.158		2.38787	-22.9154	1	2	1
2.38787	-22.9154	-25.5556		2.42954	-23.2722	1	2	1
2.42954	-23.2722	-25.9021		2.47121	-23.629	1	2	1
2.47121	-23.629	-26.2589		2.51287	-23.894	1	2	1
2.51287	-23.894	-26.524		2.55454	-24.2915	1	2	1
2.55454	-24.2915	-26.9113		2.59621	-24.6483	1	2	1
2.59621	-24.6483	-27.2681		2.63787	-24.9847	1	2	1
2.63787	-24.9847	-27.6045		2.67954	-25.3109	1	2	1
2.67954	-25.3109	-27.9511		2.72121	-25.6881	1	2	1
2.72121	-25.6881	-28.3282		2.76287	-25.8614	1	2	1
2.76287	-25.8614	-28.4709		2.80454	-26.2793	1	2	1
2.80454	-26.2793	-28.9195		2.84621	-26.6463	1	2	1
2.84621	-26.6463	-29.2864		2.88787	-27.0336	1	2	1
2.88787	-27.0336	-29.6738		2.92954	-27.2783	1	2	1
2.92954	-27.2783	-29.9083		2.97121	-27.7166	1	2	1
2.97121	-27.7166	-30.367		3.01287	-27.6656	1	2	1
3.01287	-27.6656	-30.316		3.05454	-28.0632	1	2	1
3.05454	-28.0632	-30.7034		3.09621	-28.3996	1	2	1
3.09621	-28.3996	-31.0601		3.13787	-28.8073	1	2	1
3.13787	-28.8073	-31.4577		3.17954	-29.1233	1	2	1
3.17954	-29.1233	-31.7635		3.22121	-29.5005	1	2	1
3.22121	-29.5005	-32.1509		3.26287	-29.8369	1	2	1
3.26287	-29.8369	-32.4975		3.30454	-30.1529	1	2	1
3.30454	-30.1529	-32.8236		3.34621	-30.4587	1	2	1
3.34621	-30.4587	-33.1193		3.38787	-30.7441	1	2	1
3.38787	-30.7441	-33.4047		3.42954	-31.1315	1	2	1
3.42954	-31.1315	-33.8022		3.47121	-31.4577	1	2	1
3.47121	-31.4577	-34.1284		3.51287	-31.7533	1	2	1
3.51287	-31.7533	-34.4037		3.55454	-32.0693	1	2	1
3.55454	-32.0693	-34.7503		3.59621	-32.3547	1	2	1
3.59621	-32.3547	-35.0357		3.63787	-32.7217	1	2	1
3.63787	-32.7217	-35.4128		3.67954	-32.9867	1	2	1
3.67954	-32.9867	-35.6983		3.72121	-33.3435	1	2	1
3.72121	-33.3435	-36.0449		3.76287	-33.7309	1	2	1
3.76287	-33.7309	-36.422		3.80454	-34.0469	1	2	1
3.80454	-34.0469	-36.7584		3.84621	-34.3425	1	2	1
3.84621	-34.3425	-37.0438		3.88787	-34.7401	1	2	1
3.88787	-34.7401	-37.4414		3.92954	-35.0561	1	2	1
3.92954	-35.0561	-37.7676		3.97121	-35.4332	1	2	1
3.97121	-35.4332	-38.1346		4.01287	-35.6167	1	2	1
4.01287	-35.6167	-38.3894		4.05454	-35.9327	1	2	1
4.05454	-35.9327	-38.7156		4.09621	-36.3099	1	2	1
4.09621	-36.3099	-39.0928		4.13787	-36.6871	1	2	1
4.13787	-36.6871	-39.4597		4.17954	-37.0744	1	2	1
4.17954	-37.0744	-39.8471		4.22121	-37.4312	1	2	1
4.22121	-37.4312	-40.2141		4.26287	-37.8491	1	2	1
4.26287	-37.8491	-40.6116		4.30454	-38.2467	1	2	1
4.30454	-38.2467	-41.0092		4.34621	-38.5933	1	2	1
4.34621	-38.5933	-41.366		4.38787	-38.9806	1	2	1
4.38787	-38.9806	-41.7431		4.42954	-39.3272	1	2	1
4.42954	-39.3272	-42.1101		4.47121	-39.7146	1	2	1
4.47121	-39.7146	-42.4975		4.51287	-40.0815	1	2	1
4.51287	-40.0815	-42.8542		4.55454	-40.5199	1	2	1
4.55454	-40.5199	-43.2926		4.59621	-40.8359	1	2	1
4.59621	-40.8359	-43.629		4.63787	-41.3048	1	2	1
4.63787	-41.3048	-44.0877		4.67954	-41.6208	1	2	1
4.67954	-41.6208	-44.4343		4.72121	-42.1203	1	2	1
4.72121	-42.1203	-44.9235		4.76287	-42.5382	1	2	1
4.76287	-42.5382	-45.3517		4.80454	-43.0071	1	2	1
4.80454	-43.0071	-45.8206		4.84621	-43.3741	1	2	1
4.84621	-43.3741	-46.0856		4.88787	-43.9246	1	2	1
4.88787	-43.9246	-46.6361		4.92954	-44.4546	1	2	1
4.92954	-44.4546	-47.1764		4.97121	-45.0561	1	2	1
4.97121	-45.0561	-47.7778		5.01287	-45.6473	1	2	1
5.01287	-45.6473	-48.369		5.05454	-46.1774	1	2	1
5.05454	-46.1774	-48.9093		5.09621	-46.7788	1	2	1
5.09621	-46.7788	-49.5413		5.13787	-47.4006	1	2	1
5.13787	-47.4006	-50.1529		5.17954	-47.9001	1	2	1
5.17954	-47.9001	-50.5912		5.22121	-48.5729	1	2	1
5.22121	-48.5729	-51.3456		5.26287	-49.2355	1	2	1
5.26287	-49.2355	-51.998		5.30454	-49.8369	1	2	1
5.30454	-49.8369	-52.5892		5.34621	-50.4893	1	2	1
5.34621	-50.4893	-53.2416		5.38787	-51.1315	1	2	1
5.38787	-51.1315	-53.9246		5.42954	-51.7941	1	2	1
5.42954	-51.7941	-54.5464		5.47121	-52.4771	1	2	1
5.47121	-52.4771	-55.2497		5.51287	-53.1498	1	2	1
5.51287	-53.1498	-55.9327		5.55454	-53.8532	1	2	1
5.55454	-53.8532	-56.6259		5.59621	-54.3527	1	2	1
5.59621	-54.3527	-57.1254		5.63787	-54.9439	1	2	1
5.63787	-54.9439	-57.7166		5.67954	-55.5759	1	2	1
5.67954	-55.5759	-58.3792		5.72121	-56.208	1	2	1
5.72121	-56.208	-59.001		5.76287	-56.8196	1	2	1
5.76287	-56.8196	-59.6228		5.80454	-57.4312	1	2	1
5.80454	-57.4312	-60.2446		5.84621	-58.053	1	2	1
5.84621	-58.053	-60.9174		5.88787	-58.8583	1	2	1
5.88787	-58.8583	-61.6718		5.92954	-59.5617	1	2	1
5.92954	-59.5617	-62.3751		5.97121	-60.3058	1	2	1
5.97121	-60.3058	-63.1091		6.01287	-61.0296	1	2	1
6.01287	-61.0296	-63.8736		6.05454	-61.7533	1	2	1
6.05454	-61.7533	-64.6075		6.09621	-62.1203	1	2	1
6.09621	-62.1203	-64.8828		6.13787	-63.2722	1	2	1
6.13787	-63.2722	-65.9939		6.17954	-64.2304	1	2	1
6.17954	-64.2304	-67.0336		6.22121	-65.158	1	2	1
6.22121	-65.158	-67.9409		6.26287	-66.0449	1	2	1
6.26287	-66.0449	-68.8481		6.30454	-66.9623	1	2	1
6.30454	-66.9623	-69.7961		6.34621	-67.8593	1	2	1
6.34621	-67.8593	-70.6932		6.38787	-68.7462	1	2	1
6.38787	-68.7462	-71.6106		6.42954	-69.6126	1	2	1
6.42954	-69.6126	-72.4873		6.47121	-70.5097	1	2	1
6.47121	-70.5097	-73.3843		6.51287	-71.4169	1	2	1
6.51287	-71.4169	-74.2915		6.55454	-72.3955	1	2	1
6.55454	-72.3955	-75.2803		6.59621	-73.3231	1	2	1
6.59621	-73.3231	-76.2181		6.63787	-74.2304	1	2	1
6.63787	-74.2304	-77.1356		6.67954	-75.107	1	2	1
6.67954	-75.107	-78.0428		6.72121	-76.0449	1	2	1
6.72121	-76.0449	-78.9806		6.76287	-76.8502	1	2	1
6.76287	-76.8502	-79.7554		6.80454	-77.8491	1	2	1
6.80454	-77.8491	-80.7747		6.84621	-78.8175	1	2	1
6.84621	-78.8175	-81.7635		6.88787	-79.8879	1	2	1
6.88787	-79.8879	-82.844		6.92954	-80.9276	1	2	1
6.92954	-80.9276	-83.8838		6.97121	-81.9674	1	2	1
6.97121	-81.9674	-84.9235		7.01287	-83.0377	1	2	1
7.01287	-83.0377	-86.0143		7.05454	-84.2202	1	2	1
7.05454	-84.2202	-87.1967		7.09621	-85.3619	1	2	1
7.09621	-85.3619	-88.3792		7.13787	-86.5647	1	2	1
7.13787	-86.5647	-89.6024		7.17954	-87.737	1	2	1
7.17954	-87.737	-90.8155		7.22121	-88.9093	1	2	1
7.22121	-88.9093	-92.0082		7.26287	-90.1835	1	2	1
7.26287	-90.1835	-93.3231		7.30454	-91.4781	1	2	1
7.30454	-91.4781	-94.6279		7.34621	-92.8236	1	2	1
7.34621	-92.8236	-96.0245		7.38787	-94.1896	1	2	1
7.38787	-94.1896	-97.4006		7.42954	-95.5046	1	2	1
7.42954	-95.5046	-98.7564		7.47121	-96.738	1	2	1
7.47121	-96.738	-100.183		7.51287	-98.3588	1	2	1
7.51287	-98.3588	-101.682		7.55454	-99.8063	1	2	1
7.55454	-99.8063	-103.18		7.59621	-101.162	1	2	1
7.59621	-101.162	-104.659		7.63787	-102.661	1	2	1
7.63787	-102.661	-106.137		7.67954	-104.139	1	2	1
7.67954	-104.139	-107.696		7.72121	-105.698	1	2	1
7.72121	-105.698	-109.256		7.76287	-107.299	1	2	1
7.76287	-107.299	-110.948		7.80454	-108.919	1	2	1
7.80454	-108.919	-112.508		7.84621	-110.499	1	2	1
7.84621	-110.499	-114.2		7.88787	-112.018	1	2	1
7.88787	-112.018	-115.698		7.92954	-113.792	1	2	1
7.92954	-113.792	-117.543		7.97121	-115.423	1	2	1
7.97121	-115.423	-119.286		8.01287	-117.217	1	2	1
8.01287	-117.217	-121.111		8.05454	-119.001	1	2	1
8.05454	-119.001	-122.966		8.09621	-120.775	1	2	1
8.09621	-120.775	-124.832		8.13787	-122.61	1	2	1
8.13787	-122.61	-126.748		8.17954	-124.363	1	2	1
8.17954	-124.363	-128.624		8.22121	-126.157	1	2	1
8.22121	-126.157	-130.51		8.26287	-128.012	1	2	1
8.26287	-128.012	-132.426		8.30454	-129.755	1	2	1
8.30454	-129.755	-134.292		8.34621	-131.529	1	2	1
8.34621	-131.529	-136.167		8.38787	-133.384	1	2	1
8.38787	-133.384	-138.206		8.42954	-135.321	1	2	1
8.42954	-135.321	-140.245		8.47121	-137.197	1	2	1
8.47121	-137.197	-142.222		8.51287	-139.032	1	2	1
8.51287	-139.032	-144.21		8.55454	-140.907	1	2	1
8.55454	-140.907	-146.3		8.59621	-142.926	1	2	1
8.59621	-142.926	-148.4		8.63787	-144.546	1	2	1
8.63787	-144.546	-150.336		8.67954	-146.361	1	2	1
8.67954	-146.361	-152.345		8.72121	-147.88	1	2	1
8.72121	-147.88	-154.312		8.76287	-150.01	1	2	1
8.76287	-150.01	-156.351		8.80454	-151.978	1	2	1
8.80454	-151.978	-158.42		8.84621	-153.71	1	2	1
8.84621	-153.71	-160.377		8.88787	-155.403	1	2	1
8.88787	-155.403	-162.273		8.92954	-157.207	1	2	1
8.92954	-157.207	-164.241		8.97121	-158.991	1	2	1
8.97121	-158.991	-165.994		9.01287	-160.581	1	2	1
9.01287	-160.581	-167.717		9.05454	-162.202	1	2	1
9.05454	-162.202	-169.348		9.09621	-163.71	1	2	1
9.09621	-163.71	-170.989		9.13787	-165.24	1	2	1
9.13787	-165.24	-172.559		9.17954	-166.758	1	2	1
9.17954	-166.758	-174.118		9.22121	-168.155	1	2	1
9.22121	-168.155	-175.607		9.26287	-169.48	1	2	1
9.26287	-169.48	-177.023		9.30454	-170.968	1	2	1
9.30454	-170.968	-178.583		9.34621	-172.232	1	2	1
9.34621	-172.232	-179.939		9.38787	-173.496	1	2	1
9.38787	-173.496	-181.274		9.42954	-174.679	1	2	1
9.42954	-174.679	-182.497		9.47121	-175.841	1	2	1
9.47121	-175.841	-183.761		9.51287	-176.942	1	2	1
9.51287	-176.942	-184.944		9.55454	-178.053	1	2	1
9.55454	-178.053	-186.126		9.59621	-179.103	1	2	1
9.59621	-179.103	-187.227		9.63787	-179.786	1	2	1
9.63787	-179.786	-188.043		9.67954	-180.958	1	2	1
9.67954	-180.958	-189.195		9.72121	-181.947	1	2	1
9.72121	-181.947	-190.173		9.76287	-182.895	1	2	1
9.76287	-182.895	-191.203		9.80454	-183.772	1	2	1
9.80454	-183.772	-192.12		9.84621	-184.709	1	2	1
9.84621	-184.709	-193.14		9.88787	-185.596	1	2	1
9.88787	-185.596	-194.169		9.92954	-186.534	1	2	1
9.92954	-186.534	-195.24		9.97121	-187.156	1	2	1
9.97121	-187.156	-195.892		10.0129	-188.104	1	2	1
10.0129	-188.104	-196.891		10.0545	-189.001	1	2	1
10.0545	-189.001	-197.931		10.0962	-189.888	1	2	1
10.0962	-189.888	-198.909		10.1379	-190.805	1	2	1
10.1379	-190.805	-199.898		10.1795	-191.723	1	2	1
10.1795	-191.723	-200.856		10.2212	-192.518	1	2	1
10.2212	-192.518	-201.896		10.2629	-193.517	1	2	1
10.2629	-193.517	-202.895		10.3045	-194.393	1	2	1
10.3045	-194.393	-203.772		10.3462	-195.464	1	2	1
10.3462	-195.464	-205.036		10.3879	-196.351	1	2	1
10.3879	-196.351	-206.116		10.4295	-197.258	1	2	1
10.4295	-197.258	-207.146		10.4712	-198.145	1	2	1
10.4712	-198.145	-208.165		10.5129	-199.011	1	2	1
10.5129	-199.011	-209.195		10.5545	-199.888	1	2	1
10.5545	-199.888	-210.265		10.5962	-199.766	1	2	1
10.5962	-199.766	-210.245		10.6379	-201.682	1	2	1
10.6379	-201.682	-212.314		10.6795	-202.599	1	2	1
10.6795	-202.599	-213.405		10.7212	-203.415	1	2	1
10.7212	-203.415	-214.526		10.7629	-204.404	1	2	1
10.7629	-204.404	-215.708		10.8045	-205.321	1	2	1
10.8045	-205.321	-216.911		10.8462	-206.075	1	2	1
10.8462	-206.075	-218.012		10.8879	-207.115	1	2	1
10.8879	-207.115	-219.195		10.9295	-208.053	1	2	1
10.9295	-208.053	-220.316		10.9712	-208.97	1	2	1
10.9712	-208.97	-221.142		11.0129	-210.061	1	2	1
11.0129	-210.061	-222.62		11.0545	-211.05	1	2	1
11.0545	-211.05	-223.965		11.0962	-212.018	1	2	1
11.0962	-212.018	-225.158		11.1379	-212.997	1	2	1
11.1379	-212.997	-226.524		11.1795	-214.057	1	2	1
11.1795	-214.057	-227.87		11.2212	-215.025	1	2	1
11.2212	-215.025	-229.093		11.2629	-215.912	1	2	1
11.2629	-215.912	-230.316		11.3045	-216.871	1	2	1
11.3045	-216.871	-231.631		11.3462	-217.88	1	2	1
11.3462	-217.88	-232.946		11.3879	-218.797	1	2	1
11.3879	-218.797	-234.261		11.4295	-219.755	1	2	1
11.4295	-219.755	-235.505		11.4712	-220.765	1	2	1
11.4712	-220.765	-236.82		11.5129	-221.702	1	2	1
11.5129	-221.702	-238.145		11.5545	-222.671	1	2	1
11.5545	-222.671	-239.276		11.5962	-223.486	1	2	1
11.5962	-223.486	-240.693		11.6379	-224.2	1	2	1
11.6379	-224.2	-241.794		11.6795	-225.25	1	2	1
11.6795	-225.25	-243.16		11.7212	-226.045	1	2	1
11.7212	-226.045	-244.404		11.7629	-223.986	1	2	1
11.7629	-223.986	-242.059		11.8045	-227.635	1	2	1
11.8045	-227.635	-247.064		11.8462	-228.93	1	2	1
11.8462	-228.93	-248.848		11.8879	-230.122	1	2	1
11.8879	-230.122	-250.561		11.9295	-231.182	1	2	1
11.9295	-231.182	-252.222		11.9712	-232.283	1	2	1
11.9712	-232.283	-253.761		12.0129	-233.68	1	2	1
12.0129	-233.68	-255.484		12.0545	-234.832	1	2	1
12.0545	-234.832	-257.156		12.0962	-235.973	1	2	1
12.0962	-235.973	-258.981		12.1379	-237.023	1	2	1
12.1379	-237.023	-260.724		12.1795	-238.084	1	2	1
12.1795	-238.084	-262.518		12.2212	-239.185	1	2	1
12.2212	-239.185	-264.292		12.2629	-240.285	1	2	1
12.2629	-240.285	-266.004		12.3045	-241.376	1	2	1
12.3045	-241.376	-267.91		12.3462	-242.477	1	2	1
12.3462	-242.477	-269.766		12.3879	-243.476	1	2	1
12.3879	-243.476	-271.57		12.4295	-244.852	1	2	1
12.4295	-244.852	-273.863		12.4712	-245.953	1	2	1
12.4712	-245.953	-275.708		12.5129	-247.146	1	2	1
12.5129	-247.146	-277.788		12.5545	-248.277	1	2	1
12.5545	-248.277	-279.827		12.5962	-230.877	1	2	1
12.5962	-230.877	-264.954		12.6379	-250.163	1	2	1
12.6379	-250.163	-282.824		12.6795	-251.6	1	2	1
12.6795	-251.6	-285.362		12.7212	-252.905	1	2	1
12.7212	-252.905	-287.829		12.7629	-254.067	1	2	1
12.7629	-254.067	-290.122		12.8045	-255.24	1	2	1
12.8045	-255.24	-292.497		12.8462	-256.371	1	2	1
12.8462	-256.371	-294.873		12.8879	-257.492	1	2	1
12.8879	-257.492	-297.288		12.9295	-258.767	1	2	1
12.9295	-258.767	-299.857		12.9712	-260.01	1	2	1
12.9712	-260.01	-302.396		13.0129	-261.244	1	2	1
13.0129	-261.244	-304.975		13.0545	-262.13	1	2	1
13.0545	-262.13	-307.309		13.0962	-263.537	1	2	1
13.0962	-263.537	-310.53		13.1379	-265.066	1	2	1
13.1379	-265.066	-313.833		13.1795	-266.361	1	2	1
13.1795	-266.361	-316.453		13.2212	-267.482	1	2	1
13.2212	-267.482	-319.46		13.2629	-268.869	1	2	1
13.2629	-268.869	-322.497		13.3045	-269.898	1	2	1
13.3045	-269.898	-325.535		13.3462	-271.417	1	2	1
13.3462	-271.417	-328.491		13.3879	-272.681	1	2	1
13.3879	-272.681	-331.539		13.4295	-274.057	1	2	1
13.4295	-274.057	-334.516		13.4712	-275.362	1	2	1
13.4712	-275.362	-337.859		13.5129	-276.697	1	2	1
13.5129	-276.697	-341.101		13.5545	-277.951	1	2	1
13.5545	-277.951	-344.2		13.5962	-279.215	1	2	1
13.5962	-279.215	-347.727		13.6379	-280.591	1	2	1
13.6379	-280.591	-351.274		13.6795	-282.528	1	2	1
13.6795	-282.528	-353.231		13.7212	-284.037	1	2	1
13.7212	-284.037	-357.88		13.7629	-285.423	1	2	1
13.7629	-285.423	-361.315		13.8045	-286.769	1	2	1
13.8045	-286.769	-364.903		13.8462	-288.124	1	2	1
13.8462	-288.124	-368.97		13.8879	-289.429	1	2	1
13.8879	-289.429	-372.885		13.9295	-290.907	1	2	1
13.9295	-290.907	-376.911		13.9712	-292.181	1	2	1
13.9712	-292.181	-380.795		14.0129	-293.629	1	2	1
14.0129	-293.629	-385.331		14.0615	-290.357	1	2	1
14.0615	-290.357	-380.499		14.1032	-297.074	1	2	1
14.1032	-297.074	-394.281		14.1448	-298.716	1	2	1
14.1448	-298.716	-399.827		14.1865	-300.357	1	2	1
14.1865	-300.357	-404.699		14.2282	-301.957	1	2	1
14.2282	-301.957	-408.909		14.2698	-303.415	1	2	1
14.2698	-303.415	-412.966		14.3115	-304.995	1	2	1
14.3115	-304.995	-418.705		14.3532	-306.463	1	2	1
14.3532	-306.463	-423.293		14.3948	-308.073	1	2	1
14.3948	-308.073	-427.819		14.4365	-309.694	1	2	1
14.4365	-309.694	-432.864		14.4782	-311.295	1	2	1
14.4782	-311.295	-438.287		14.5198	-312.905	1	2	1
14.5198	-312.905	-443.507		14.5615	-314.648	1	2	1
14.5615	-314.648	-449.001		14.6032	-316.218	1	2	1
14.6032	-316.218	-454.037		14.6448	-316.83	1	2	1
14.6448	-316.83	-451.427		14.6865	-320.499	1	2	1
14.6865	-320.499	-464.679		14.7282	-322.65	1	2	1
14.7282	-322.65	-472.345		14.7698	-324.577	1	2	1
14.7698	-324.577	-478.94		14.8115	-326.29	1	2	1
14.8115	-326.29	-485.535		14.8532	-327.859	1	2	1
14.8532	-327.859	-490.795		14.8948	-329.898	1	2	1
14.8948	-329.898	-498.124		14.9365	-331.519	1	2	1
14.9365	-331.519	-504.332		14.9782	-333.66	1	2	1
14.9782	-333.66	-511.59		15.0198	-335.352	1	2	1
15.0198	-335.352	-517.747		15.0615	-337.085	1	2	1
15.0615	-337.085	-524.006		15.1032	-338.634	1	2	1
15.1032	-338.634	-530.459		15.1448	-340.734	1	2	1
15.1448	-340.734	-537.36		15.1865	-342.64	1	2	1
15.1865	-342.64	-544.19		15.2282	-344.648	1	2	1
15.2282	-344.648	-551.335		15.2698	-346.606	1	2	1
15.2698	-346.606	-559.174		15.3115	-348.981	1	2	1
15.3115	-348.981	-567.299		15.3532	-351.417	1	2	1
15.3532	-351.417	-575.719		15.3948	-353.68	1	2	1
15.3948	-353.68	-584.465		15.4365	-355.882	1	2	1
15.4365	-355.882	-593.17		15.4782	-358.175	1	2	1
15.4782	-358.175	-601.407		15.5198	-360.673	1	2	1
15.5198	-360.673	-610.112		15.5615	-362.64	1	2	1
15.5615	-362.64	-619.429		15.6032	-365.403	1	2	1
15.6032	-365.403	-629.531		15.6448	-368.053	1	2	1
15.6448	-368.053	-638.96		15.6865	-370.642	1	2	1
15.6865	-370.642	-648.919		15.7282	-372.875	1	2	1
15.7282	-372.875	-659.827		15.7698	-375.443	1	2	1
15.7698	-375.443	-670.51		15.8115	-378.665	1	2	1
15.8115	-378.665	-681.386		15.8532	-381.764	1	2	1
15.8532	-381.764	-693.66		15.8948	-384.536	1	2	1
15.8948	-384.536	-705.657		15.9365	-387.125	1	2	1
15.9365	-387.125	-717.248		15.9782	-390.031	1	2	1
15.9782	-390.031	-728.583		16.0198	-392.63	1	2	1
16.0198	-392.63	-740.887		16.0615	-395.576	1	2	1
16.0615	-395.576	-752.589		16.1032	-398.654	1	2	1
16.1032	-398.654	-765.953		16.1448	-401.733	1	2	1
16.1448	-401.733	-779.562		16.1865	-405.087	1	2	1
16.1865	-405.087	-793.996		16.2282	-407.88	1	2	1
16.2282	-407.88	-808.369		16.2698	-410.968	1	2	1
16.2698	-410.968	-824.251		16.3115	-414.404	1	2	1
16.3115	-414.404	-840.622		16.3532	-417.788	1	2	1
16.3532	-417.788	-856.932		16.3948	-421.325	1	2	1
16.3948	-421.325	-874.037		16.4365	-424.903	1	2	1
16.4365	-424.903	-892.681		16.4782	-428.094	1	2	1
16.4782	-428.094	-911.743		16.5198	-432.069	1	2	1
16.5198	-432.069	-929.735		16.5615	-435.362	1	2	1
16.5615	-435.362	-950.734		16.6032	-439.48	1	2	1
16.6032	-439.48	-973.639		16.6448	-443.211	1	2	1
16.6448	-443.211	-995.046		16.6865	-447.543	1	2	1
16.6865	-447.543	-1018.12		16.7282	-451.325	1	2	1
16.7282	-451.325	-1040.9		16.7698	-452.334	1	2	1
16.7698	-452.334	-1061.51		16.8115	-463.558	1	2	1
16.8115	-463.558	-1089.4		16.8532	-468.522	1	2	1
16.8532	-468.522	-1115.86		16.8948	-472.732	1	2	1
16.8948	-472.732	-1139.28		16.9365	-477.594	1	2	1
16.9365	-477.594	-1169.49		16.9782	-482.803	1	2	1
16.9782	-482.803	-1200.9		17.0198	-487.757	1	2	1
17.0198	-487.757	-1232.27		17.0615	-493.017	1	2	1
17.0615	-493.017	-1264.78		17.1032	-497.737	1	2	1
17.1032	-497.737	-1298.31		17.1448	-502.762	1	2	1
17.1448	-502.762	-1331		17.1865	-507.87	1	2	1
17.1865	-507.87			17.2282	-512.355	1	2	1
17.2282	-512.355			17.2698	-517.37	1	2	1
17.2698	-517.37			17.3115	-521.916	1	2	1
17.3115	-521.916			17.3532	-527.604	1	2	1
17.3532	-527.604			17.3948	-532.956	1	2	1
17.3948	-532.956			17.4365	-538.196	1	2	1
17.4365	-538.196			17.4782	-543.874	1	2	1
17.4782	-543.874			17.5198	-549.755	1	2	1
17.5198	-549.755			17.5615	-555.566	1	2	1
17.5615	-555.566			17.6032	-561.59	1	2	1
17.6032	-561.59			17.6448	-568.277	1	2	1
17.6448	-568.277			17.6865	-574.781	1	2	1
17.6865	-574.781			17.7282	-581.254	1	2	1
17.7282	-581.254			17.7698	-587.013	1	2	1
17.7698	-587.013			17.8115	-593.476	1	2	1
17.8115	-593.476			17.8532	-600.285	1	2	1
17.8532	-600.285			17.8948	-602.844	1	2	1
17.8948	-602.844			17.9365	-614.995	1	2	1
17.9365	-614.995			17.9782	-623.364	1	2	1
17.9782	-623.364			18.0198	-631.621	1	2	1
18.0198	-631.621			18.0615	-638.96	1	2	1
18.0615	-638.96			18.1032	-646.86	1	2	1
18.1032	-646.86			18.1448	-654.567	1	2	1
18.1448	-654.567			18.1865	-662.599	1	2	1
18.1865	-662.599			18.2282	-670.479	1	2	1
18.2282	-670.479			18.2698	-678.695	1	2	1
18.2698	-678.695			18.3115	-687.268	1	2	1
18.3115	-687.268			18.3532	-695.607	1	2	1
18.3532	-695.607			18.3948	-702.864	1	2	1
18.3948	-702.864			18.4365	-711.07	1	2	1
18.4365	-711.07			18.4782	-719.205	1	2	1
18.4782	-719.205			18.5198	-728.216	1	2	1
18.5198	-728.216			18.5615	-737.054	1	2	1
18.5615	-737.054			18.6032	-746.942	1	2	1
18.6032	-746.942			18.6448	-757.798	1	2	1
18.6448	-757.798			18.6865	-768.624	1	2	1
18.6865	-768.624			18.7282	-779.429	1	2	1
18.7282	-779.429			18.7698	-740.52	1	2	1
18.7698	-740.52			18.8115	-816.065	1	2	1
18.8115	-816.065			18.8532	-840.877	1	2	1
18.8532	-840.877			18.8948	-856.514	1	2	1
18.8948	-856.514			18.9365	-871.886	1	2	1
18.9365	-871.886			18.9782	-884.669	1	2	1
18.9782	-884.669			19.0198	-896.463	1	2	1
19.0198	-896.463			19.0615	-929.134	1	2	1
19.0615	-929.134			19.1032	-944.852	1	2	1
19.1032	-944.852			19.1448	-958.512	1	2	1
19.1448	-958.512			19.1865	-972.538	1	2	1
19.1865	-972.538			19.2282	-987.146	1	2	1
19.2282	-987.146			19.2698	-1003.82	1	2	1
19.2698	-1003.82			19.3115	-1020.25	1	2	1
19.3115	-1020.25			19.3532	-1039.14	1	2	1
19.3532	-1039.14			0.0423611	-3.96534	1	1	1
				0.0840278	-4.1998	1	1	1
				0.125694	-4.71967	1	1	1
				0.167361	-5.34149	1	1	1
				0.209028	-5.50459	1	1	1
				0.250694	-6.29969	1	1	1
				0.292361	-6.70744	1	1	1
				0.334028	-7.24771	1	1	1
				0.375694	-7.86952	1	1	1
				0.417361	-8.50153	1	1	1
				0.459028	-9.14373	1	1	1
				0.500694	-9.69419	1	1	1
				0.542361	-9.8369	1	1	1
				0.584028	-10.581	1	1	1
				0.625694	-10.9276	1	1	1
				0.667361	-11.4475	1	1	1
				0.709028	-11.8043	1	1	1
				0.750694	-11.2029	1	1	1
				0.792361	-12.3547	1	1	1
				0.834028	-12.895	1	1	1
				0.882639	-13.3843	1	1	1
				0.93125	-13.6697	1	1	1
				0.972917	-13.2212	1	1	1
				1.01458	-14.1488	1	1	1
				1.05625	-14.6279	1	1	1
				1.09792	-14.9032	1	1	1
				1.13958	-15.3211	1	1	1
				1.18125	-15.7492	1	1	1
				1.22292	-16.1978	1	1	1
				1.26458	-16.5851	1	1	1
				1.30625	-17.0031	1	1	1
				1.34792	-17.3904	1	1	1
				1.38958	-17.7676	1	1	1
				1.43125	-18.1346	1	1	1
				1.47292	-18.5219	1	1	1
				1.51458	-18.9195	1	1	1
				1.55625	-19.103	1	1	1
				1.59792	-19.5107	1	1	1
				1.63958	-19.8267	1	1	1
				1.68125	-20.0408	1	1	1
				1.72292	-20.3058	1	1	1
				1.76458	-20.7034	1	1	1
				1.79829	-20.9276	1	1	1
				1.80246	-20.948	1	1	1
				1.80662	-20.9174	1	1	1
				1.81079	-20.999	1	1	1
				1.81496	-20.9684	1	1	1
				1.81912	-20.897	1	1	1
				1.82329	-20.9174	1	1	1
				1.82746	-20.999	1	1	1
				1.83162	-21.0296	1	1	1
				1.83579	-21.0907	1	1	1
				1.84621	-21.1723	1	1	1
				1.88787	-21.6004	1	1	1
				1.92954	-21.896	1	1	1
				1.97121	-22.2936	1	1	1
				2.01287	-22.4057	1	1	1
				2.05454	-22.7319	1	1	1
				2.09621	-23.16	1	1	1
				2.13787	-23.5066	1	1	1
				2.17954	-23.8532	1	1	1
				2.22121	-23.7717	1	1	1
				2.26287	-24.4241	1	1	1
				2.30454	-24.7706	1	1	1
				2.34621	-25.158	1	1	1
				2.38787	-25.5556	1	1	1
				2.42954	-25.9021	1	1	1
				2.47121	-26.2589	1	1	1
				2.51287	-26.524	1	1	1
				2.55454	-26.9113	1	1	1
				2.59621	-27.2681	1	1	1
				2.63787	-27.6045	1	1	1
				2.67954	-27.9511	1	1	1
				2.72121	-28.3282	1	1	1
				2.76287	-28.4709	1	1	1
				2.80454	-28.9195	1	1	1
				2.84621	-29.2864	1	1	1
				2.88787	-29.6738	1	1	1
				2.92954	-29.9083	1	1	1
				2.97121	-30.367	1	1	1
				3.01287	-30.316	1	1	1
				3.05454	-30.7034	1	1	1
				3.09621	-31.0601	1	1	1
				3.13787	-31.4577	1	1	1
				3.17954	-31.7635	1	1	1
				3.22121	-32.1509	1	1	1
				3.26287	-32.4975	1	1	1
				3.30454	-32.8236	1	1	1
				3.34621	-33.1193	1	1	1
				3.38787	-33.4047	1	1	1
				3.42954	-33.8022	1	1	1
				3.47121	-34.1284	1	1	1
				3.51287	-34.4037	1	1	1
				3.55454	-34.7503	1	1	1
				3.59621	-35.0357	1	1	1
				3.63787	-35.4128	1	1	1
				3.67954	-35.6983	1	1	1
				3.72121	-36.0449	1	1	1
				3.76287	-36.422	1	1	1
				3.80454	-36.7584	1	1	1
				3.84621	-37.0438	1	1	1
				3.88787	-37.4414	1	1	1
				3.92954	-37.7676	1	1	1
				3.97121	-38.1346	1	1	1
				4.01287	-38.3894	1	1	1
				4.05454	-38.7156	1	1	1
				4.09621	-39.0928	1	1	1
				4.13787	-39.4597	1	1	1
				4.17954	-39.8471	1	1	1
				4.22121	-40.2141	1	1	1
				4.26287	-40.6116	1	1	1
				4.30454	-41.0092	1	1	1
				4.34621	-41.366	1	1	1
				4.38787	-41.7431	1	1	1
				4.42954	-42.1101	1	1	1
				4.47121	-42.4975	1	1	1
				4.51287	-42.8542	1	1	1
				4.55454	-43.2926	1	1	1
				4.59621	-43.629	1	1	1
				4.63787	-44.0877	1	1	1
				4.67954	-44.4343	1	1	1
				4.72121	-44.9235	1	1	1
				4.76287	-45.3517	1	1	1
				4.80454	-45.8206	1	1	1
				4.84621	-46.0856	1	1	1
				4.88787	-46.6361	1	1	1
				4.92954	-47.1764	1	1	1
				4.97121	-47.7778	1	1	1
				5.01287	-48.369	1	1	1
				5.05454	-48.9093	1	1	1
				5.09621	-49.5413	1	1	1
				5.13787	-50.1529	1	1	1
				5.17954	-50.5912	1	1	1
				5.22121	-51.3456	1	1	1
				5.26287	-51.998	1	1	1
				5.30454	-52.5892	1	1	1
				5.34621	-53.2416	1	1	1
				5.38787	-53.9246	1	1	1
				5.42954	-54.5464	1	1	1
				5.47121	-55.2497	1	1	1
				5.51287	-55.9327	1	1	1
				5.55454	-56.6259	1	1	1
				5.59621	-57.1254	1	1	1
				5.63787	-57.7166	1	1	1
				5.67954	-58.3792	1	1	1
				5.72121	-59.001	1	1	1
				5.76287	-59.6228	1	1	1
				5.80454	-60.2446	1	1	1
				5.84621	-60.9174	1	1	1
				5.88787	-61.6718	1	1	1
				5.92954	-62.3751	1	1	1
				5.97121	-63.1091	1	1	1
				6.01287	-63.8736	1	1	1
				6.05454	-64.6075	1	1	1
				6.09621	-64.8828	1	1	1
				6.13787	-65.9939	1	1	1
				6.17954	-67.0336	1	1	1
				6.22121	-67.9409	1	1	1
				6.26287	-68.8481	1	1	1
				6.30454	-69.7961	1	1	1
				6.34621	-70.6932	1	1	1
				6.38787	-71.6106	1	1	1
				6.42954	-72.4873	1	1	1
				6.47121	-73.3843	1	1	1
				6.51287	-74.2915	1	1	1
				6.55454	-75.2803	1	1	1
				6.59621	-76.2181	1	1	1
				6.63787	-77.1356	1	1	1
				6.67954	-78.0428	1	1	1
				6.72121	-78.9806	1	1	1
				6.76287	-79.7554	1	1	1
				6.80454	-80.7747	1	1	1
				6.84621	-81.7635	1	1	1
				6.88787	-82.844	1	1	1
				6.92954	-83.8838	1	1	1
				6.97121	-84.9235	1	1	1
				7.01287	-86.0143	1	1	1
				7.05454	-87.1967	1	1	1
				7.09621	-88.3792	1	1	1
				7.13787	-89.6024	1	1	1
				7.17954	-90.8155	1	1	1
				7.22121	-92.0082	1	1	1
				7.26287	-93.3231	1	1	1
				7.30454	-94.6279	1	1	1
				7.34621	-96.0245	1	1	1
				7.38787	-97.4006	1	1	1
				7.42954	-98.7564	1	1	1
				7.47121	-100.183	1	1	1
				7.51287	-101.682	1	1	1
				7.55454	-103.18	1	1	1
				7.59621	-104.659	1	1	1
				7.63787	-106.137	1	1	1
				7.67954	-107.696	1	1	1
				7.72121	-109.256	1	1	1
				7.76287	-110.948	1	1	1
				7.80454	-112.508	1	1	1
				7.84621	-114.2	1	1	1
				7.88787	-115.698	1	1	1
				7.92954	-117.543	1	1	1
				7.97121	-119.286	1	1	1
				8.01287	-121.111	1	1	1
				8.05454	-122.966	1	1	1
				8.09621	-124.832	1	1	1
				8.13787	-126.748	1	1	1
				8.17954	-128.624	1	1	1
				8.22121	-130.51	1	1	1
				8.26287	-132.426	1	1	1
				8.30454	-134.292	1	1	1
				8.34621	-136.167	1	1	1
				8.38787	-138.206	1	1	1
				8.42954	-140.245	1	1	1
				8.47121	-142.222	1	1	1
				8.51287	-144.21	1	1	1
				8.55454	-146.3	1	1	1
				8.59621	-148.4	1	1	1
				8.63787	-150.336	1	1	1
				8.67954	-152.345	1	1	1
				8.72121	-154.312	1	1	1
				8.76287	-156.351	1	1	1
				8.80454	-158.42	1	1	1
				8.84621	-160.377	1	1	1
				8.88787	-162.273	1	1	1
				8.92954	-164.241	1	1	1
				8.97121	-165.994	1	1	1
				9.01287	-167.717	1	1	1
				9.05454	-169.348	1	1	1
				9.09621	-170.989	1	1	1
				9.13787	-172.559	1	1	1
				9.17954	-174.118	1	1	1
				9.22121	-175.607	1	1	1
				9.26287	-177.023	1	1	1
				9.30454	-178.583	1	1	1
				9.34621	-179.939	1	1	1
				9.38787	-181.274	1	1	1
				9.42954	-182.497	1	1	1
				9.47121	-183.761	1	1	1
				9.51287	-184.944	1	1	1
				9.55454	-186.126	1	1	1
				9.59621	-187.227	1	1	1
				9.63787	-188.043	1	1	1
				9.67954	-189.195	1	1	1
				9.72121	-190.173	1	1	1
				9.76287	-191.203	1	1	1
				9.80454	-192.12	1	1	1
				9.84621	-193.14	1	1	1
				9.88787	-194.169	1	1	1
				9.92954	-195.24	1	1	1
				9.97121	-195.892	1	1	1
				10.0129	-196.891	1	1	1
				10.0545	-197.931	1	1	1
				10.0962	-198.909	1	1	1
				10.1379	-199.898	1	1	1
				10.1795	-200.856	1	1	1
				10.2212	-201.896	1	1	1
				10.2629	-202.895	1	1	1
				10.3045	-203.772	1	1	1
				10.3462	-205.036	1	1	1
				10.3879	-206.116	1	1	1
				10.4295	-207.146	1	1	1
				10.4712	-208.165	1	1	1
				10.5129	-209.195	1	1	1
				10.5545	-210.265	1	1	1
				10.5962	-210.245	1	1	1
				10.6379	-212.314	1	1	1
				10.6795	-213.405	1	1	1
				10.7212	-214.526	1	1	1
				10.7629	-215.708	1	1	1
				10.8045	-216.911	1	1	1
				10.8462	-218.012	1	1	1
				10.8879	-219.195	1	1	1
				10.9295	-220.316	1	1	1
				10.9712	-221.142	1	1	1
				11.0129	-222.62	1	1	1
				11.0545	-223.965	1	1	1
				11.0962	-225.158	1	1	1
				11.1379	-226.524	1	1	1
				11.1795	-227.87	1	1	1
				11.2212	-229.093	1	1	1
				11.2629	-230.316	1	1	1
				11.3045	-231.631	1	1	1
				11.3462	-232.946	1	1	1
				11.3879	-234.261	1	1	1
				11.4295	-235.505	1	1	1
				11.4712	-236.82	1	1	1
				11.5129	-238.145	1	1	1
				11.5545	-239.276	1	1	1
				11.5962	-240.693	1	1	1
				11.6379	-241.794	1	1	1
				11.6795	-243.16	1	1	1
				11.7212	-244.404	1	1	1
				11.7629	-242.059	1	1	1
				11.8045	-247.064	1	1	1
				11.8462	-248.848	1	1	1
				11.8879	-250.561	1	1	1
				11.9295	-252.222	1	1	1
				11.9712	-253.761	1	1	1
				12.0129	-255.484	1	1	1
				12.0545	-257.156	1	1	1
				12.0962	-258.981	1	1	1
				12.1379	-260.724	1	1	1
				12.1795	-262.518	1	1	1
				12.2212	-264.292	1	1	1
				12.2629	-266.004	1	1	1
				12.3045	-267.91	1	1	1
				12.3462	-269.766	1	1	1
				12.3879	-271.57	1	1	1
				12.4295	-273.863	1	1	1
				12.4712	-275.708	1	1	1
				12.5129	-277.788	1	1	1
				12.5545	-279.827	1	1	1
				12.5962	-264.954	1	1	1
				12.6379	-282.824	1	1	1
				12.6795	-285.362	1	1	1
				12.7212	-287.829	1	1	1
				12.7629	-290.122	1	1	1
				12.8045	-292.497	1	1	1
				12.8462	-294.873	1	1	1
				12.8879	-297.288	1	1	1
				12.9295	-299.857	1	1	1
				12.9712	-302.396	1	1	1
				13.0129	-304.975	1	1	1
				13.0545	-307.309	1	1	1
				13.0962	-310.53	1	1	1
				13.1379	-313.833	1	1	1
				13.1795	-316.453	1	1	1
				13.2212	-319.46	1	1	1
				13.2629	-322.497	1	1	1
				13.3045	-325.535	1	1	1
				13.3462	-328.491	1	1	1
				13.3879	-331.539	1	1	1
				13.4295	-334.516	1	1	1
				13.4712	-337.859	1	1	1
				13.5129	-341.101	1	1	1
				13.5545	-344.2	1	1	1
				13.5962	-347.727	1	1	1
				13.6379	-351.274	1	1	1
				13.6795	-353.231	1	1	1
				13.7212	-357.88	1	1	1
				13.7629	-361.315	1	1	1
				13.8045	-364.903	1	1	1
				13.8462	-368.97	1	1	1
				13.8879	-372.885	1	1	1
				13.9295	-376.911	1	1	1
				13.9712	-380.795	1	1	1
				14.0129	-385.331	1	1	1
				14.0615	-380.499	1	1	1
				14.1032	-394.281	1	1	1
				14.1448	-399.827	1	1	1
				14.1865	-404.699	1	1	1
				14.2282	-408.909	1	1	1
				14.2698	-412.966	1	1	1
				14.3115	-418.705	1	1	1
				14.3532	-423.293	1	1	1
				14.3948	-427.819	1	1	1
				14.4365	-432.864	1	1	1
				14.4782	-438.287	1	1	1
				14.5198	-443.507	1	1	1
				14.5615	-449.001	1	1	1
				14.6032	-454.037	1	1	1
				14.6448	-451.427	1	1	1
				14.6865	-464.679	1	1	1
				14.7282	-472.345	1	1	1
				14.7698	-478.94	1	1	1
				14.8115	-485.535	1	1	1
				14.8532	-490.795	1	1	1
				14.8948	-498.124	1	1	1
				14.9365	-504.332	1	1	1
				14.9782	-511.59	1	1	1
				15.0198	-517.747	1	1	1
				15.0615	-524.006	1	1	1
				15.1032	-530.459	1	1	1
				15.1448	-537.36	1	1	1
				15.1865	-544.19	1	1	1
				15.2282	-551.335	1	1	1
				15.2698	-559.174	1	1	1
				15.3115	-567.299	1	1	1
				15.3532	-575.719	1	1	1
				15.3948	-584.465	1	1	1
				15.4365	-593.17	1	1	1
				15.4782	-601.407	1	1	1
				15.5198	-610.112	1	1	1
				15.5615	-619.429	1	1	1
				15.6032	-629.531	1	1	1
				15.6448	-638.96	1	1	1
				15.6865	-648.919	1	1	1
				15.7282	-659.827	1	1	1
				15.7698	-670.51	1	1	1
				15.8115	-681.386	1	1	1
				15.8532	-693.66	1	1	1
				15.8948	-705.657	1	1	1
				15.9365	-717.248	1	1	1
				15.9782	-728.583	1	1	1
				16.0198	-740.887	1	1	1
				16.0615	-752.589	1	1	1
				16.1032	-765.953	1	1	1
				16.1448	-779.562	1	1	1
				16.1865	-793.996	1	1	1
				16.2282	-808.369	1	1	1
				16.2698	-824.251	1	1	1
				16.3115	-840.622	1	1	1
				16.3532	-856.932	1	1	1
				16.3948	-874.037	1	1	1
				16.4365	-892.681	1	1	1
				16.4782	-911.743	1	1	1
				16.5198	-929.735	1	1	1
				16.5615	-950.734	1	1	1
				16.6032	-973.639	1	1	1
				16.6448	-995.046	1	1	1
				16.6865	-1018.12	1	1	1
				16.7282	-1040.9	1	1	1
				16.7698	-1061.51	1	1	1
				16.8115	-1089.4	1	1	1
				16.8532	-1115.86	1	1	1
				16.8948	-1139.28	1	1	1
				16.9365	-1169.49	1	1	1
				16.9782	-1200.9	1	1	1
				17.0198	-1232.27	1	1	1
				17.0615	-1264.78	1	1	1
				17.1032	-1298.31	1	1	1
				17.1448	-1331	1	1	1
				0.744594	0.894743	2	0	100000000
				1.07399	0.869134	2	0	100000000
				1.64119	0.825988	2	0	100000000
				1.98593	0.802902	2	0	100000000
				2.21518	0.787342	2	0	100000000
				2.74623	0.750589	2	0	100000000
				2.97762	0.734146	2	0	100000000
				3.63956	0.691085	2	0	100000000
				3.97789	0.668713	2	0	100000000
				4.66176	0.625063	2	0	100000000
				5.165	0.589529	2	0	100000000
				5.63897	0.555341	2	0	100000000
				6.08366	0.526661	2	0	100000000
				6.73992	0.487048	2	0	100000000
				7.86104	0.426535	2	0	100000000
				8.62575	0.38587	2	0	100000000
				9.60266	0.334609	2	0	100000000
				9.93506	0.318839	2	0	100000000
				10.5888	0.291211	2	0	100000000
				10.9451	0.277082	2	0	100000000
				11.5998	0.254458	2	0	100000000
				11.9738	0.241379	2	0	100000000
				12.5932	0.221741	2	0	100000000
				13.0198	0.208705	2	0	100000000
				13.6586	0.190664	2	0	100000000
				14.0538	0.180404	2	0	100000000
				14.6147	0.167368	2	0	100000000
				16.7411	0.126913	2	0	100000000
				17.8618	0.108495	2	0	100000000
				18.7518	0.0948276	2	0	100000000
				19.0072	0.0910008	2	0	100000000
				19.6538	0.0815391	2	0	100000000
