# Supplementary material for: A pore-size classification for peat bogs derived from unsaturated hydraulic properties
Source: Copernicus journal article supplement (doi:10.5194/hess-21-6185-2017), 2017-12-07
Supplement: Supplementary file 17 [file data_A.3.2.2_5.xls]

## Sheet: Information
Parameter Name	Value
Allgemeine Informationen
Probenbezeichnung:	A.3.2.2_30
Start der Messung:	08.12.2012 17:51:08
Stopp der Messung:	31.12.2012 12:58:40
Dauer der Messung:	22 Tage
Geometrische Parameter
Bodenvolumen [cm3]:	237,8
Bodensäulenhöhe [cm]:	5
Position unteres Tensiometer [cm]:	3,75
Position oberes Tensiometer [cm]:	1,25
HYPROP Parameters
Messkopf-Nettogewicht [g]:	361,4
Stechzylinderleergewicht [g]:	4,3
Lufteintrittspunkt obere Kerze [bar]:	8,8
Lufteintrittspunkt untere Kerze [bar]:	8,8
Dichte des Bodensubstrates [g/cm3]:	1,4
Statistische Analyse
Tensiometer [hPa]:	0,6
Waage [g]:	0,06
Messkopf Informationen
Busnumber:	12
Subaddress:	2
Seriennummer:	390
Messkopfname:	No. 390
Firmware Version:	n. def.
Waagen Informationen
Seriennummer:
Waagenname:
Konfiguration
Volumenkorrektur [ml]:	0
Gewichtskorrektur [g]:	0
Start/Stopp Linie
Start	08.12.2012 17:51:08
Stopp	25.12.2012 21:58:40
Berechnung des Wassergehaltes
Berechnung des Wassergehaltes	Vom Bodentrockengewicht [g]:
Anfangswassergehalt [Vol%]:	0,961984837813769
Bodentrockengewicht [g]:	12,8
Zusätzliche Bodenparameter
Lagerungsdichte [g/cm3]:	0,05
Porosität [-]:	0,96
Fitting Parameter
INTERPOL	2
Tensiometer_Mean	2
Polynomial_degree	5
wtheta	1
wk	0,001
Fitting
Modell Retentionskurve	van Genuchten constrained (1980)
Modell Leitfähigkeitskurve	Mualem
Modellbeschreibung:	Klassisches van Genuchten-Mualem-Modell (van Genuchten, 1980)
Notiz

## Sheet: Messung-Tension
Datum / Zeit	Tension unten [hPa]	Tension oben [hPa]
2012-12-08 17:51:08	1.28	3.81
2012-12-08 17:52:08	1.27	3.8
2012-12-08 17:53:08	1.27	3.8
2012-12-08 17:54:08	1.27	3.81
2012-12-08 17:55:08	1.29	3.81
2012-12-08 17:56:08	1.29	3.82
2012-12-08 17:57:08	1.31	3.82
2012-12-08 17:58:08	1.3	3.81
2012-12-08 17:59:08	1.29	3.81
2012-12-08 18:00:08	1.28	3.81	2012-12-08 18:00:08
2012-12-08 18:02:08	1.73	4.21
2012-12-08 18:03:08	1.29	3.81
2012-12-08 18:04:08	1.22	3.76
2012-12-08 18:05:08	1.27	3.79
2012-12-08 18:06:08	1.29	3.82
2012-12-08 18:07:08	1.32	3.83
2012-12-08 18:08:08	1.33	3.84
2012-12-08 18:09:08	1.34	3.85
2012-12-08 18:10:08	1.33	3.84
2012-12-08 18:11:08	1.33	3.84
2012-12-08 18:12:08	1.33	3.84
2012-12-08 18:13:08	1.34	3.84
2012-12-08 18:14:08	1.35	3.84
2012-12-08 18:15:08	1.34	3.85
2012-12-08 18:16:08	1.34	3.84
2012-12-08 18:17:08	1.34	3.85
2012-12-08 18:18:08	1.34	3.84
2012-12-08 18:19:08	1.35	3.85
2012-12-08 18:20:08	1.35	3.85
2012-12-08 18:21:08	1.35	3.85
2012-12-08 18:22:08	1.35	3.85
2012-12-08 18:23:08	1.35	3.84
2012-12-08 18:24:08	1.35	3.84
2012-12-08 18:25:08	1.35	3.84
2012-12-08 18:26:08	1.36	3.85
2012-12-08 18:27:08	1.35	3.85
2012-12-08 18:28:08	1.35	3.84
2012-12-08 18:29:08	1.35	3.84
2012-12-08 18:30:08	1.35	3.85
2012-12-08 18:31:08	1.36	3.84
2012-12-08 18:32:08	1.36	3.85
2012-12-08 18:33:08	1.36	3.85
2012-12-08 18:34:08	1.36	3.85
2012-12-08 18:35:08	1.36	3.85
2012-12-08 18:36:08	1.36	3.85
2012-12-08 18:37:08	1.37	3.86
2012-12-08 18:38:08	1.38	3.86
2012-12-08 18:39:08	1.39	3.86
2012-12-08 18:40:08	1.38	3.85
2012-12-08 18:41:08	1.37	3.85
2012-12-08 18:42:08	1.38	3.86
2012-12-08 18:43:08	1.38	3.86
2012-12-08 18:44:08	1.38	3.86
2012-12-08 18:45:08	1.39	3.87
2012-12-08 18:46:08	1.38	3.86
2012-12-08 18:47:08	1.38	3.86
2012-12-08 18:48:08	1.39	3.86
2012-12-08 18:49:08	1.39	3.86
2012-12-08 18:50:08	1.39	3.87
2012-12-08 18:51:08	1.39	3.87
2012-12-08 19:01:08	1.41	3.89	2012-12-08 19:01:08
2012-12-08 19:11:08	1.43	3.9
2012-12-08 19:21:08	1.45	3.93
2012-12-08 19:31:08	1.49	3.98
2012-12-08 19:41:08	1.53	4.01
2012-12-08 19:51:08	1.59	4.07
2012-12-08 20:01:08	1.64	4.12	2012-12-08 20:01:08
2012-12-08 20:11:08	1.71	4.2
2012-12-08 20:21:08	1.8	4.28
2012-12-08 20:31:08	1.86	4.35
2012-12-08 20:41:08	1.95	4.45
2012-12-08 20:51:08	2.06	4.55
2012-12-08 21:01:08	2.13	4.63	2012-12-08 21:01:08
2012-12-08 21:11:08	2.26	4.75
2012-12-08 21:21:08	2.33	4.83
2012-12-08 21:31:08	2.46	4.96
2012-12-08 21:41:08	2.61	5.11
2012-12-08 21:51:08	2.74	5.24
2012-12-08 22:01:08	2.75	5.24	2012-12-08 22:01:08
2012-12-08 22:11:08	2.72	5.22
2012-12-08 22:21:08	2.87	5.37
2012-12-08 22:31:08	3.01	5.51
2012-12-08 22:41:08	3.17	5.67
2012-12-08 22:51:08	2.82	5.33
2012-12-08 23:01:08	2.9	5.4	2012-12-08 23:01:08
2012-12-08 23:11:08	3.05	5.56
2012-12-08 23:21:08	3.21	5.71
2012-12-08 23:31:08	3.34	5.83
2012-12-08 23:41:08	3.46	5.95
2012-12-08 23:51:08	3.55	6.06
2012-12-09 00:01:08	3.67	6.18	2012-12-09 00:01:08
2012-12-09 00:11:08	3.79	6.28
2012-12-09 00:21:08	3.85	6.36
2012-12-09 00:31:08	3.97	6.48
2012-12-09 00:41:08	4.08	6.59
2012-12-09 00:51:08	4.17	6.67
2012-12-09 01:01:08	4.07	6.58	2012-12-09 01:01:08
2012-12-09 01:11:08	4.26	6.78
2012-12-09 01:21:08	4.31	6.83
2012-12-09 01:31:08	4.25	6.76
2012-12-09 01:41:08	4.41	6.92
2012-12-09 01:51:08	4.52	7.03
2012-12-09 02:01:08	4.6	7.11	2012-12-09 02:01:08
2012-12-09 02:11:08	4.69	7.21
2012-12-09 02:21:08	4.8	7.32
2012-12-09 02:31:08	4.92	7.44
2012-12-09 02:41:08	5.03	7.54
2012-12-09 02:51:08	5.1	7.63
2012-12-09 03:01:08	5.2	7.72	2012-12-09 03:01:08
2012-12-09 03:11:08	5.32	7.84
2012-12-09 03:21:08	5.42	7.93
2012-12-09 03:31:08	5.53	8.05
2012-12-09 03:41:08	5.62	8.14
2012-12-09 03:51:08	5.7	8.22
2012-12-09 04:01:08	5.81	8.34	2012-12-09 04:01:08
2012-12-09 04:11:08	5.91	8.44
2012-12-09 04:21:08	6.03	8.55
2012-12-09 04:31:08	6.14	8.66
2012-12-09 04:41:08	6.23	8.76
2012-12-09 04:51:08	6.34	8.86
2012-12-09 05:01:08	6.45	8.97	2012-12-09 05:01:08
2012-12-09 05:11:08	6.5	9.03
2012-12-09 05:21:08	6.59	9.1
2012-12-09 05:31:08	6.71	9.24
2012-12-09 05:41:08	6.8	9.33
2012-12-09 05:51:08	6.88	9.41
2012-12-09 06:01:08	6.98	9.51	2012-12-09 06:01:08
2012-12-09 06:11:08	7.09	9.62
2012-12-09 06:21:08	7.17	9.69
2012-12-09 06:31:08	7.23	9.76
2012-12-09 06:41:08	7.33	9.85
2012-12-09 06:51:08	7.41	9.94
2012-12-09 07:01:08	7.12	9.65	2012-12-09 07:01:08
2012-12-09 07:11:08	7.33	9.87
2012-12-09 07:21:08	7.47	10
2012-12-09 07:31:08	7.57	10.1
2012-12-09 07:41:08	7.68	10.2
2012-12-09 07:51:08	7.74	10.27
2012-12-09 08:01:08	7.83	10.38	2012-12-09 08:01:08
2012-12-09 08:11:08	7.93	10.47
2012-12-09 08:21:08	7.89	10.43
2012-12-09 08:31:08	8	10.54
2012-12-09 08:41:08	8.06	10.59
2012-12-09 08:51:08	8.14	10.67
2012-12-09 09:01:08	8.17	10.72	2012-12-09 09:01:08
2012-12-09 09:11:08	8.33	10.86
2012-12-09 09:21:08	8.36	10.9
2012-12-09 09:31:08	8.31	10.85
2012-12-09 09:41:08	8.51	11.06
2012-12-09 09:51:08	8.53	11.07
2012-12-09 10:01:08	8.67	11.23	2012-12-09 10:01:08
2012-12-09 10:11:08	8.74	11.29
2012-12-09 10:21:08	8.8	11.35
2012-12-09 10:31:08	8.92	11.46
2012-12-09 10:41:08	8.96	11.51
2012-12-09 10:51:08	8.87	11.41
2012-12-09 11:01:08	9.06	11.58	2012-12-09 11:01:08
2012-12-09 11:11:08	9.15	11.69
2012-12-09 11:21:08	9.25	11.8
2012-12-09 11:31:08	9.3	11.85
2012-12-09 11:41:08	9.37	11.91
2012-12-09 11:51:08	9.36	11.94
2012-12-09 12:01:08	8.46	10.99	2012-12-09 12:01:08
2012-12-09 12:11:08	8.68	11.23
2012-12-09 12:21:08	8.93	11.47
2012-12-09 12:31:08	9.16	11.7
2012-12-09 12:41:08	9.33	11.87
2012-12-09 12:51:08	9.48	12.01
2012-12-09 13:01:08	9.58	12.12	2012-12-09 13:01:08
2012-12-09 13:11:08	9.69	12.24
2012-12-09 13:21:08	9.74	12.28
2012-12-09 13:31:08	9.85	12.4
2012-12-09 13:41:08	9.94	12.48
2012-12-09 13:51:08	10.03	12.58
2012-12-09 14:01:08	10.11	12.65	2012-12-09 14:01:08
2012-12-09 14:11:08	10.17	12.72
2012-12-09 14:21:08	10.25	12.79
2012-12-09 14:31:08	10.33	12.87
2012-12-09 14:41:08	10.37	12.92
2012-12-09 14:51:08	10.44	12.98
2012-12-09 15:11:08	10.59	13.13	2012-12-09 15:11:08
2012-12-09 15:31:08	10.59	13.14
2012-12-09 15:41:08	10.67	13.22
2012-12-09 15:51:08	10.61	13.16
2012-12-09 16:01:08	10.66	13.2
2012-12-09 16:11:08	10.82	13.36
2012-12-09 16:21:08	10.86	13.41	2012-12-09 16:21:08
2012-12-09 16:31:08	10.96	13.5
2012-12-09 16:41:08	11.04	13.59
2012-12-09 16:51:08	10.89	13.43
2012-12-09 17:01:08	10.06	12.59
2012-12-09 17:11:08	10.15	12.69
2012-12-09 17:21:08	10.43	12.97	2012-12-09 17:21:08
2012-12-09 17:31:08	10.74	13.25
2012-12-09 17:41:08	10.93	13.48
2012-12-09 17:51:08	11.02	13.56
2012-12-09 18:01:08	11.19	13.71
2012-12-09 18:11:08	11.28	13.81
2012-12-09 18:21:08	11.36	13.88	2012-12-09 18:21:08
2012-12-09 18:31:08	11.4	13.93
2012-12-09 18:41:08	11.54	14.07
2012-12-09 18:51:08	11.62	14.15
2012-12-09 19:01:08	11.66	14.18
2012-12-09 19:11:08	11.74	14.27
2012-12-09 19:21:08	11.82	14.35	2012-12-09 19:21:08
2012-12-09 19:31:08	11.86	14.38
2012-12-09 19:41:08	11.93	14.46
2012-12-09 19:51:08	11.58	14.15
2012-12-09 20:01:08	11.88	14.43
2012-12-09 20:11:08	12	14.57
2012-12-09 20:21:08	12.06	14.62	2012-12-09 20:21:08
2012-12-09 20:31:08	12.21	14.77
2012-12-09 20:41:08	12.27	14.83
2012-12-09 20:51:08	12.28	14.83
2012-12-09 21:01:08	12.38	14.93
2012-12-09 21:11:08	12.43	15
2012-12-09 21:21:08	12.48	15.03	2012-12-09 21:21:08
2012-12-09 21:31:08	12.58	15.14
2012-12-09 21:41:08	12.67	15.24
2012-12-09 21:51:08	12.78	15.34
2012-12-09 22:01:08	12.85	15.4
2012-12-09 22:11:08	12.9	15.46
2012-12-09 22:21:08	12.89	15.45	2012-12-09 22:21:08
2012-12-09 22:31:08	13	15.56
2012-12-09 22:41:08	13.04	15.6
2012-12-09 22:51:08	13.14	15.71
2012-12-09 23:01:08	13.21	15.77
2012-12-09 23:11:08	13.28	15.84
2012-12-09 23:21:08	13.32	15.89	2012-12-09 23:21:08
2012-12-09 23:31:08	13.36	15.94
2012-12-09 23:41:08	13.44	16.01
2012-12-09 23:51:08	13.54	16.1
2012-12-10 00:01:08	13.61	16.18
2012-12-10 00:11:08	13.63	16.2
2012-12-10 00:21:08	13.7	16.27	2012-12-10 00:21:08
2012-12-10 00:31:08	13.79	16.37
2012-12-10 00:41:08	13.86	16.41
2012-12-10 00:51:08	13.91	16.48
2012-12-10 01:01:08	13.99	16.56
2012-12-10 01:11:08	14.03	16.59
2012-12-10 01:21:08	14.11	16.68	2012-12-10 01:21:08
2012-12-10 01:31:08	14.1	16.67
2012-12-10 01:41:08	14.22	16.8
2012-12-10 01:51:08	14.28	16.87
2012-12-10 02:01:08	14.39	16.95
2012-12-10 02:11:08	14.48	17.04
2012-12-10 02:21:08	14.5	17.06	2012-12-10 02:21:08
2012-12-10 02:31:08	14.54	17.12
2012-12-10 02:41:08	14.61	17.17
2012-12-10 02:51:08	14.67	17.24
2012-12-10 03:01:08	14.72	17.29
2012-12-10 03:11:08	14.77	17.34
2012-12-10 03:21:08	14.86	17.43	2012-12-10 03:21:08
2012-12-10 03:31:08	14.91	17.48
2012-12-10 03:41:08	14.99	17.56
2012-12-10 03:51:08	15.02	17.59
2012-12-10 04:01:08	15.1	17.66
2012-12-10 04:11:08	15.15	17.74
2012-12-10 04:21:08	15.22	17.79	2012-12-10 04:21:08
2012-12-10 04:31:08	15.32	17.89
2012-12-10 04:41:08	15.37	17.95
2012-12-10 04:51:08	15.43	18.01
2012-12-10 05:01:08	15.49	18.07
2012-12-10 05:11:08	15.52	18.09
2012-12-10 05:21:08	15.59	18.17	2012-12-10 05:21:08
2012-12-10 05:31:08	15.6	18.18
2012-12-10 05:41:08	15.69	18.26
2012-12-10 05:51:08	15.76	18.34
2012-12-10 06:01:08	15.84	18.42
2012-12-10 06:11:08	15.89	18.47
2012-12-10 06:21:08	15.99	18.56	2012-12-10 06:21:08
2012-12-10 06:31:08	16.03	18.6
2012-12-10 06:41:08	16.03	18.6
2012-12-10 06:51:08	16.06	18.62
2012-12-10 07:01:08	16.11	18.69
2012-12-10 07:11:08	16.12	18.68
2012-12-10 07:21:08	16.16	18.74	2012-12-10 07:21:08
2012-12-10 07:31:08	16.25	18.82
2012-12-10 07:41:08	16.32	18.9
2012-12-10 07:51:08	16.4	18.97
2012-12-10 08:01:08	16.46	19.04
2012-12-10 08:11:08	16.51	19.09
2012-12-10 08:21:08	16.56	19.14	2012-12-10 08:21:08
2012-12-10 08:31:08	16.6	19.18
2012-12-10 08:41:08	16.63	19.22
2012-12-10 08:51:08	16.69	19.27
2012-12-10 09:01:08	16.75	19.32
2012-12-10 09:11:08	16.81	19.38
2012-12-10 09:21:08	16.88	19.45	2012-12-10 09:21:08
2012-12-10 09:31:08	16.53	19.11
2012-12-10 09:41:08	16.79	19.36
2012-12-10 09:51:08	16.88	19.48
2012-12-10 10:01:08	16.98	19.56
2012-12-10 10:11:08	17	19.59
2012-12-10 10:21:08	17.09	19.66	2012-12-10 10:21:08
2012-12-10 10:31:08	17.17	19.76
2012-12-10 10:41:08	17.19	19.77
2012-12-10 10:51:08	17.27	19.85
2012-12-10 11:01:08	17.29	19.86
2012-12-10 11:11:08	17.35	19.92
2012-12-10 11:21:08	17.33	19.92	2012-12-10 11:21:08
2012-12-10 11:31:08	17.4	19.99
2012-12-10 11:41:08	17.49	20.07
2012-12-10 11:51:08	17.56	20.14
2012-12-10 12:01:08	17.59	20.17
2012-12-10 12:11:08	17.66	20.23
2012-12-10 12:21:08	17.73	20.31	2012-12-10 12:21:08
2012-12-10 12:31:08	17.76	20.33
2012-12-10 12:41:08	17.77	20.35
2012-12-10 12:51:08	17.82	20.39
2012-12-10 13:01:08	17.88	20.47
2012-12-10 13:08:40	17.94	20.52
2012-12-10 13:09:40	17.94	20.53	2012-12-10 13:09:40
2012-12-10 13:10:40	17.95	20.54
2012-12-10 13:11:40	17.95	20.53
2012-12-10 13:12:40	17.98	20.54
2012-12-10 13:13:40	17.96	20.54
2012-12-10 13:14:40	17.97	20.54
2012-12-10 13:15:40	17.99	20.55	2012-12-10 13:15:40
2012-12-10 13:16:40	17.99	20.56
2012-12-10 13:17:40	17.99	20.56
2012-12-10 13:18:40	17.97	20.55
2012-12-10 13:19:40	18	20.57
2012-12-10 13:20:40	17.95	20.52
2012-12-10 13:21:40	17.94	20.52	2012-12-10 13:21:40
2012-12-10 13:22:40	17.97	20.55
2012-12-10 13:23:40	17.98	20.55
2012-12-10 13:24:40	17.96	20.53
2012-12-10 13:25:40	18.02	20.59
2012-12-10 13:26:40	18	20.57
2012-12-10 13:27:40	18.02	20.6	2012-12-10 13:27:40
2012-12-10 13:28:40	17.96	20.53
2012-12-10 13:29:40	17.98	20.55
2012-12-10 13:30:40	17.99	20.56
2012-12-10 13:31:40	18	20.58
2012-12-10 13:32:40	17.97	20.54
2012-12-10 13:33:40	18	20.57	2012-12-10 13:33:40
2012-12-10 13:34:40	17.78	20.36
2012-12-10 13:35:40	17.83	20.4
2012-12-10 13:36:40	17.85	20.42
2012-12-10 13:37:40	17.87	20.45
2012-12-10 13:38:40	17.92	20.48
2012-12-10 13:39:40	17.92	20.5	2012-12-10 13:39:40
2012-12-10 13:40:40	17.93	20.5
2012-12-10 13:41:40	17.94	20.52
2012-12-10 13:42:40	17.98	20.55
2012-12-10 13:43:40	17.95	20.52
2012-12-10 13:44:40	18	20.58
2012-12-10 13:45:40	17.97	20.52	2012-12-10 13:45:40
2012-12-10 13:46:40	18	20.56
2012-12-10 13:47:40	17.99	20.57
2012-12-10 13:48:40	18.01	20.58
2012-12-10 13:49:40	18.01	20.59
2012-12-10 13:50:40	18.01	20.57
2012-12-10 13:51:40	18.03	20.6	2012-12-10 13:51:40
2012-12-10 13:52:40	18.04	20.61
2012-12-10 13:53:40	18.02	20.6
2012-12-10 13:54:40	18.04	20.61
2012-12-10 13:55:40	18.06	20.63
2012-12-10 13:56:40	18.01	20.59
2012-12-10 13:57:40	18.05	20.63	2012-12-10 13:57:40
2012-12-10 13:58:40	18.06	20.65
2012-12-10 13:59:40	18.09	20.66
2012-12-10 14:00:40	18.11	20.69
2012-12-10 14:01:40	18.1	20.67
2012-12-10 14:02:40	18.09	20.67
2012-12-10 14:03:40	18.11	20.69	2012-12-10 14:03:40
2012-12-10 14:04:40	18.14	20.7
2012-12-10 14:05:40	18.13	20.7
2012-12-10 14:06:40	18.15	20.71
2012-12-10 14:07:40	18.15	20.72
2012-12-10 14:08:40	18.14	20.7
2012-12-10 14:18:40	18.18	20.77	2012-12-10 14:18:40
2012-12-10 14:28:40	18.26	20.82
2012-12-10 14:38:40	18.31	20.88
2012-12-10 14:48:40	18.39	20.96
2012-12-10 14:58:40	18.48	21.07
2012-12-10 15:08:40	18.51	21.09
2012-12-10 15:18:40	18.61	21.19	2012-12-10 15:18:40
2012-12-10 15:28:40	18.63	21.2
2012-12-10 15:38:40	18.72	21.29
2012-12-10 15:48:40	18.79	21.36
2012-12-10 15:58:40	18.82	21.39
2012-12-10 16:08:40	18.87	21.44
2012-12-10 16:18:40	18.9	21.48	2012-12-10 16:18:40
2012-12-10 16:28:40	18.97	21.55
2012-12-10 16:38:40	19.04	21.61
2012-12-10 16:48:40	19.1	21.68
2012-12-10 16:58:40	19.14	21.7
2012-12-10 17:08:40	19.22	21.8
2012-12-10 17:18:40	19.29	21.87	2012-12-10 17:18:40
2012-12-10 17:28:40	19.33	21.9
2012-12-10 17:38:40	19.39	21.97
2012-12-10 17:48:40	18.84	21.41
2012-12-10 17:58:40	19.1	21.68
2012-12-10 18:08:40	19.27	21.85
2012-12-10 18:18:40	19.4	21.98	2012-12-10 18:18:40
2012-12-10 18:28:40	19.49	22.07
2012-12-10 18:38:40	19.57	22.14
2012-12-10 18:48:40	19.65	22.23
2012-12-10 18:58:40	19.69	22.27
2012-12-10 19:08:40	19.49	22.08
2012-12-10 19:18:40	19.72	22.3	2012-12-10 19:18:40
2012-12-10 19:28:40	19.79	22.37
2012-12-10 19:38:40	19.87	22.44
2012-12-10 19:48:40	19.93	22.51
2012-12-10 19:58:40	20	22.58
2012-12-10 20:08:40	20.08	22.66
2012-12-10 20:18:40	20.13	22.72	2012-12-10 20:18:40
2012-12-10 20:28:40	20.2	22.78
2012-12-10 20:38:40	20.26	22.85
2012-12-10 20:48:40	20.34	22.92
2012-12-10 20:58:40	20.35	22.93
2012-12-10 21:08:40	20.39	22.98
2012-12-10 21:18:40	20.47	23.06	2012-12-10 21:18:40
2012-12-10 21:28:40	20.55	23.14
2012-12-10 21:38:40	20.58	23.15
2012-12-10 21:48:40	20.58	23.16
2012-12-10 21:58:40	20.69	23.27
2012-12-10 22:08:40	20.76	23.31
2012-12-10 22:18:40	20.82	23.4	2012-12-10 22:18:40
2012-12-10 22:28:40	20.9	23.49
2012-12-10 22:38:40	20.94	23.52
2012-12-10 22:48:40	21.02	23.61
2012-12-10 22:58:40	21.12	23.69
2012-12-10 23:08:40	21.15	23.74
2012-12-10 23:18:40	20.74	23.32	2012-12-10 23:18:40
2012-12-10 23:28:40	20.98	23.55
2012-12-10 23:38:40	21.13	23.71
2012-12-10 23:48:40	21.22	23.8
2012-12-10 23:58:40	21.2	23.77
2012-12-11 00:08:40	21.3	23.87
2012-12-11 00:18:40	21.38	23.96	2012-12-11 00:18:40
2012-12-11 00:28:40	21.47	24.05
2012-12-11 00:38:40	21.52	24.09
2012-12-11 00:48:40	21.62	24.18
2012-12-11 00:58:40	21.66	24.25
2012-12-11 01:08:40	21.72	24.31
2012-12-11 01:18:40	21.73	24.3	2012-12-11 01:18:40
2012-12-11 01:28:40	21.64	24.22
2012-12-11 01:38:40	21.81	24.39
2012-12-11 01:48:40	21.89	24.47
2012-12-11 01:58:40	21.97	24.55
2012-12-11 02:08:40	22.06	24.64
2012-12-11 02:18:40	22.11	24.68	2012-12-11 02:18:40
2012-12-11 02:28:40	22.1	24.72
2012-12-11 02:38:40	22.21	24.78
2012-12-11 02:48:40	22.29	24.87
2012-12-11 02:58:40	22.36	24.94
2012-12-11 03:08:40	22.44	25.03
2012-12-11 03:18:40	22.48	25.07	2012-12-11 03:18:40
2012-12-11 03:28:40	22.55	25.14
2012-12-11 03:38:40	22.65	25.23
2012-12-11 03:48:40	22.7	25.29
2012-12-11 03:58:40	22.78	25.35
2012-12-11 04:08:40	22.83	25.39
2012-12-11 04:18:40	22.83	25.41	2012-12-11 04:18:40
2012-12-11 04:28:40	22.85	25.43
2012-12-11 04:38:40	22.95	25.53
2012-12-11 04:48:40	23.01	25.57
2012-12-11 04:58:40	23.07	25.64
2012-12-11 05:08:40	23.11	25.7
2012-12-11 05:18:40	23.18	25.76	2012-12-11 05:18:40
2012-12-11 05:28:40	23.23	25.82
2012-12-11 05:38:40	23.3	25.89
2012-12-11 05:48:40	23.34	25.93
2012-12-11 05:58:40	23.38	25.97
2012-12-11 06:08:40	23.44	26.02
2012-12-11 06:18:40	23.44	26.02	2012-12-11 06:18:40
2012-12-11 06:28:40	23.54	26.12
2012-12-11 06:38:40	23.62	26.18
2012-12-11 06:48:40	23.64	26.22
2012-12-11 06:58:40	23.66	26.25
2012-12-11 07:08:40	23.77	26.34
2012-12-11 07:18:40	23.83	26.4	2012-12-11 07:18:40
2012-12-11 07:28:40	23.92	26.5
2012-12-11 07:38:40	23.95	26.52
2012-12-11 07:48:40	24.03	26.59
2012-12-11 07:58:40	24.04	26.63
2012-12-11 08:08:40	24.14	26.73
2012-12-11 08:18:40	24.18	26.75	2012-12-11 08:18:40
2012-12-11 08:28:40	24.23	26.82
2012-12-11 08:38:40	24.29	26.87
2012-12-11 08:48:40	24.32	26.92
2012-12-11 08:58:40	24.38	26.97
2012-12-11 09:08:40	24.47	27.05
2012-12-11 09:18:40	24.51	27.08	2012-12-11 09:18:40
2012-12-11 09:28:40	24.56	27.15
2012-12-11 09:38:40	24.59	27.17
2012-12-11 09:48:40	24.69	27.27
2012-12-11 09:58:40	24.75	27.34
2012-12-11 10:08:40	24.8	27.4
2012-12-11 10:18:40	24.83	27.42	2012-12-11 10:18:40
2012-12-11 10:28:40	24.87	27.46
2012-12-11 10:38:40	24.92	27.5
2012-12-11 10:48:40	24.97	27.55
2012-12-11 10:58:40	25.07	27.65
2012-12-11 11:08:40	25.13	27.72
2012-12-11 11:18:40	25.2	27.79	2012-12-11 11:18:40
2012-12-11 11:28:40	25.25	27.83
2012-12-11 11:38:40	25.32	27.91
2012-12-11 11:48:40	25.38	27.96
2012-12-11 11:58:40	24.84	27.43
2012-12-11 12:08:40	25.15	27.74
2012-12-11 12:18:40	25.37	27.93	2012-12-11 12:18:40
2012-12-11 12:28:40	25.39	27.97
2012-12-11 12:38:40	25.53	28.1
2012-12-11 12:48:40	25.58	28.16
2012-12-11 12:58:40	25.64	28.23
2012-12-11 13:08:40	25.71	28.29
2012-12-11 13:18:40	25.78	28.37	2012-12-11 13:18:40
2012-12-11 13:28:40	25.83	28.42
2012-12-11 13:38:40	25.9	28.48
2012-12-11 13:48:40	25.96	28.55
2012-12-11 13:58:40	26.02	28.61
2012-12-11 14:08:40	26.08	28.67
2012-12-11 14:18:40	26.14	28.73	2012-12-11 14:18:40
2012-12-11 14:28:40	26.22	28.81
2012-12-11 14:38:40	26.28	28.85
2012-12-11 14:48:40	26.32	28.9
2012-12-11 14:58:40	26.4	28.96
2012-12-11 15:08:40	26.45	29.03
2012-12-11 15:18:40	26.52	29.11	2012-12-11 15:18:40
2012-12-11 15:28:40	26.52	29.11
2012-12-11 15:38:40	26.59	29.18
2012-12-11 15:48:40	26.65	29.24
2012-12-11 15:58:40	26.7	29.29
2012-12-11 16:08:40	26.71	29.3
2012-12-11 16:18:40	26.76	29.34	2012-12-11 16:18:40
2012-12-11 16:28:40	26.88	29.47
2012-12-11 16:38:40	26.95	29.54
2012-12-11 16:48:40	27	29.6
2012-12-11 16:58:40	27.08	29.67
2012-12-11 17:08:40	27.16	29.75
2012-12-11 17:18:40	27.19	29.79	2012-12-11 17:18:40
2012-12-11 17:28:40	25.98	28.58
2012-12-11 17:38:40	26.23	28.86
2012-12-11 17:48:40	26.54	29.16
2012-12-11 17:58:40	26.79	29.4
2012-12-11 18:08:40	27	29.57
2012-12-11 18:18:40	27.14	29.74	2012-12-11 18:18:40
2012-12-11 18:28:40	27.25	29.84
2012-12-11 18:38:40	27.3	29.89
2012-12-11 18:48:40	27.39	29.98
2012-12-11 18:58:40	27.41	30
2012-12-11 19:08:40	27.49	30.09
2012-12-11 19:18:40	27.53	30.12	2012-12-11 19:18:40
2012-12-11 19:28:40	27.63	30.23
2012-12-11 19:38:40	27.7	30.3
2012-12-11 19:48:40	27.72	30.32
2012-12-11 19:58:40	27.79	30.4
2012-12-11 20:08:40	27.79	30.4
2012-12-11 20:18:40	27.86	30.47	2012-12-11 20:18:40
2012-12-11 20:28:40	27.94	30.55
2012-12-11 20:38:40	28.03	30.63
2012-12-11 20:48:40	28.08	30.69
2012-12-11 20:58:40	28.12	30.72
2012-12-11 21:08:40	28.18	30.78
2012-12-11 21:18:40	28.26	30.86	2012-12-11 21:18:40
2012-12-11 21:28:40	28.28	30.88
2012-12-11 21:38:40	28.33	30.93
2012-12-11 21:48:40	28.41	31.02
2012-12-11 21:58:40	28.44	31.04
2012-12-11 22:08:40	28.5	31.1
2012-12-11 22:18:40	28.57	31.16	2012-12-11 22:18:40
2012-12-11 22:28:40	28.6	31.22
2012-12-11 22:38:40	28.68	31.29
2012-12-11 22:48:40	28.74	31.34
2012-12-11 22:58:40	28.81	31.41
2012-12-11 23:08:40	28.84	31.45
2012-12-11 23:18:40	28.94	31.54	2012-12-11 23:18:40
2012-12-11 23:28:40	28.98	31.59
2012-12-11 23:38:40	29.05	31.67
2012-12-11 23:48:40	29.09	31.71
2012-12-11 23:58:40	29.15	31.76
2012-12-12 00:08:40	29.22	31.84
2012-12-12 00:18:40	29.27	31.88	2012-12-12 00:18:40
2012-12-12 00:28:40	29.28	31.88
2012-12-12 00:38:40	29.36	31.97
2012-12-12 00:48:40	29.35	31.97
2012-12-12 00:58:40	29.45	32.06
2012-12-12 01:08:40	29.5	32.12
2012-12-12 01:18:40	29.58	32.2	2012-12-12 01:18:40
2012-12-12 01:28:40	29.59	32.23
2012-12-12 01:38:40	29.69	32.29
2012-12-12 01:48:40	29.76	32.37
2012-12-12 01:58:40	29.81	32.43
2012-12-12 02:08:40	29.71	32.33
2012-12-12 02:18:40	29.88	32.49	2012-12-12 02:18:40
2012-12-12 02:28:40	29.9	32.51
2012-12-12 02:38:40	29.94	32.55
2012-12-12 02:48:40	29.97	32.58
2012-12-12 02:58:40	30.04	32.66
2012-12-12 03:08:40	30.11	32.73
2012-12-12 03:18:40	30.16	32.77	2012-12-12 03:18:40
2012-12-12 03:28:40	30.24	32.85
2012-12-12 03:38:40	30.31	32.93
2012-12-12 03:48:40	30.36	32.98
2012-12-12 03:58:40	30.42	33.04
2012-12-12 04:08:40	30.47	33.09
2012-12-12 04:18:40	30.54	33.16	2012-12-12 04:18:40
2012-12-12 04:28:40	30.54	33.16
2012-12-12 04:38:40	30.62	33.25
2012-12-12 04:48:40	30.7	33.32
2012-12-12 04:58:40	30.71	33.34
2012-12-12 05:08:40	30.77	33.4
2012-12-12 05:18:40	30.86	33.48	2012-12-12 05:18:40
2012-12-12 05:28:40	30.87	33.49
2012-12-12 05:38:40	30.94	33.57
2012-12-12 05:48:40	30.97	33.59
2012-12-12 05:58:40	31.02	33.65
2012-12-12 06:08:40	31.07	33.69
2012-12-12 06:18:40	31.15	33.75	2012-12-12 06:18:40
2012-12-12 06:28:40	31.2	33.83
2012-12-12 06:38:40	31.2	33.83
2012-12-12 06:48:40	31.27	33.9
2012-12-12 06:58:40	31.32	33.96
2012-12-12 07:08:40	31.39	34.03
2012-12-12 07:18:40	31.46	34.09	2012-12-12 07:18:40
2012-12-12 07:28:40	31.52	34.15
2012-12-12 07:38:40	31.57	34.19
2012-12-12 07:48:40	31.6	34.21
2012-12-12 07:58:40	31.69	34.32
2012-12-12 08:08:40	31.57	34.2
2012-12-12 08:18:40	31.74	34.37	2012-12-12 08:18:40
2012-12-12 08:28:40	31.81	34.44
2012-12-12 08:38:40	31.88	34.51
2012-12-12 08:48:40	31.95	34.58
2012-12-12 08:58:40	31.99	34.62
2012-12-12 09:08:40	32.03	34.65
2012-12-12 09:18:40	32.1	34.74	2012-12-12 09:18:40
2012-12-12 09:28:40	32.04	34.69
2012-12-12 09:38:40	32.15	34.8
2012-12-12 09:48:40	32.22	34.86
2012-12-12 09:58:40	32.28	34.93
2012-12-12 10:08:40	32.31	34.96
2012-12-12 10:18:40	32.36	35.02	2012-12-12 10:18:40
2012-12-12 10:28:40	32.44	35.09
2012-12-12 10:38:40	32.49	35.15
2012-12-12 10:48:40	32.53	35.18
2012-12-12 10:58:40	32.6	35.25
2012-12-12 11:08:40	32.66	35.31
2012-12-12 11:18:40	32.71	35.36	2012-12-12 11:18:40
2012-12-12 11:28:40	32.79	35.45
2012-12-12 11:38:40	32.83	35.48
2012-12-12 11:48:40	32.87	35.53
2012-12-12 11:58:40	32.94	35.59
2012-12-12 12:08:40	33.01	35.66
2012-12-12 12:18:40	33.09	35.73	2012-12-12 12:18:40
2012-12-12 12:28:40	33.14	35.78
2012-12-12 12:38:40	33.19	35.85
2012-12-12 12:48:40	33.25	35.89
2012-12-12 12:58:40	33.28	35.94
2012-12-12 13:08:40	33.37	36.01
2012-12-12 13:18:40	33.4	36.06	2012-12-12 13:18:40
2012-12-12 13:28:40	33.47	36.12
2012-12-12 13:38:40	33.55	36.19
2012-12-12 13:48:40	33.6	36.26
2012-12-12 13:58:40	33.66	36.32
2012-12-12 14:08:40	33.65	36.31
2012-12-12 14:18:40	33.69	36.34	2012-12-12 14:18:40
2012-12-12 14:28:40	33.79	36.44
2012-12-12 14:38:40	33.83	36.46
2012-12-12 14:48:40	33.9	36.56
2012-12-12 14:58:40	33.99	36.64
2012-12-12 15:08:40	34.02	36.67
2012-12-12 15:18:40	34.08	36.73	2012-12-12 15:18:40
2012-12-12 15:28:40	34.16	36.81
2012-12-12 15:38:40	34.16	36.81
2012-12-12 15:48:40	34.21	36.85
2012-12-12 15:58:40	34.28	36.91
2012-12-12 16:08:40	34.31	36.97
2012-12-12 16:18:40	34.39	37.05	2012-12-12 16:18:40
2012-12-12 16:28:40	34.45	37.11
2012-12-12 16:38:40	34.53	37.17
2012-12-12 16:48:40	34.58	37.23
2012-12-12 16:58:40	34.67	37.32
2012-12-12 17:08:40	34.7	37.35
2012-12-12 17:18:40	34.76	37.41	2012-12-12 17:18:40
2012-12-12 17:28:40	34.82	37.49
2012-12-12 17:38:40	34.48	37.2
2012-12-12 17:48:40	34.68	37.39
2012-12-12 17:58:40	34.81	37.53
2012-12-12 18:08:40	34.86	37.58
2012-12-12 18:18:40	34.94	37.66	2012-12-12 18:18:40
2012-12-12 18:28:40	35	37.72
2012-12-12 18:38:40	35.06	37.77
2012-12-12 18:48:40	35.13	37.84
2012-12-12 18:58:40	35.19	37.9
2012-12-12 19:08:40	35.19	37.93
2012-12-12 19:18:40	35.25	37.98	2012-12-12 19:18:40
2012-12-12 19:28:40	35.33	38.04
2012-12-12 19:38:40	35.39	38.1
2012-12-12 19:48:40	35.46	38.18
2012-12-12 19:58:40	35.53	38.24
2012-12-12 20:08:40	35.58	38.29
2012-12-12 20:18:40	35.62	38.35	2012-12-12 20:18:40
2012-12-12 20:28:40	35.68	38.4
2012-12-12 20:38:40	35.74	38.47
2012-12-12 20:48:40	35.81	38.51
2012-12-12 20:58:40	35.87	38.61
2012-12-12 21:08:40	35.97	38.67
2012-12-12 21:18:40	35.99	38.71	2012-12-12 21:18:40
2012-12-12 21:28:40	36.05	38.77
2012-12-12 21:38:40	36.11	38.83
2012-12-12 21:48:40	36.19	38.91
2012-12-12 21:58:40	36.25	38.96
2012-12-12 22:08:40	36.28	39
2012-12-12 22:18:40	36.37	39.09	2012-12-12 22:18:40
2012-12-12 22:28:40	36.44	39.16
2012-12-12 22:38:40	36.47	39.19
2012-12-12 22:48:40	36.55	39.27
2012-12-12 22:58:40	36.56	39.28
2012-12-12 23:08:40	36.65	39.36
2012-12-12 23:18:40	36.72	39.45	2012-12-12 23:18:40
2012-12-12 23:28:40	36.78	39.5
2012-12-12 23:38:40	36.84	39.56
2012-12-12 23:48:40	36.91	39.63
2012-12-12 23:58:40	36.98	39.7
2012-12-13 00:08:40	37.04	39.77
2012-12-13 00:18:40	37.13	39.84	2012-12-13 00:18:40
2012-12-13 00:28:40	37.2	39.93
2012-12-13 00:38:40	37.23	39.96
2012-12-13 00:48:40	37.3	40.04
2012-12-13 00:58:40	37.38	40.11
2012-12-13 01:08:40	37.47	40.18
2012-12-13 01:18:40	37.52	40.23	2012-12-13 01:18:40
2012-12-13 01:28:40	37.6	40.32
2012-12-13 01:38:40	37.65	40.37
2012-12-13 01:48:40	37.68	40.41
2012-12-13 01:58:40	37.76	40.49
2012-12-13 02:08:40	37.79	40.51
2012-12-13 02:18:40	37.86	40.58	2012-12-13 02:18:40
2012-12-13 02:28:40	37.88	40.61
2012-12-13 02:38:40	37.98	40.69
2012-12-13 02:48:40	38.03	40.76
2012-12-13 02:58:40	38.1	40.83
2012-12-13 03:08:40	38.19	40.9
2012-12-13 03:18:40	38.24	40.95	2012-12-13 03:18:40
2012-12-13 03:28:40	38.28	41.01
2012-12-13 03:38:40	38.34	41.07
2012-12-13 03:48:40	38.4	41.14
2012-12-13 03:58:40	38.47	41.21
2012-12-13 04:08:40	38.53	41.26
2012-12-13 04:18:40	38.58	41.31	2012-12-13 04:18:40
2012-12-13 04:28:40	38.61	41.33
2012-12-13 04:38:40	38.71	41.44
2012-12-13 04:48:40	38.78	41.5
2012-12-13 04:58:40	38.83	41.56
2012-12-13 05:08:40	38.89	41.62
2012-12-13 05:18:40	38.96	41.69	2012-12-13 05:18:40
2012-12-13 05:28:40	39	41.73
2012-12-13 05:38:40	39.09	41.82
2012-12-13 05:48:40	39.16	41.87
2012-12-13 05:58:40	39.2	41.93
2012-12-13 06:08:40	39.24	41.97
2012-12-13 06:18:40	39.32	42.04	2012-12-13 06:18:40
2012-12-13 06:28:40	39.41	42.14
2012-12-13 06:38:40	39.46	42.19
2012-12-13 06:48:40	39.52	42.25
2012-12-13 06:58:40	39.57	42.31
2012-12-13 07:08:40	39.68	42.42
2012-12-13 07:18:40	39.75	42.47	2012-12-13 07:18:40
2012-12-13 07:28:40	39.76	42.49
2012-12-13 07:38:40	39.86	42.59
2012-12-13 07:48:40	39.89	42.64
2012-12-13 07:58:40	39.95	42.7
2012-12-13 08:08:40	40.02	42.74
2012-12-13 08:18:40	40.06	42.8	2012-12-13 08:18:40
2012-12-13 08:28:40	40.15	42.89
2012-12-13 08:38:40	40.24	42.96
2012-12-13 08:48:40	40.31	43.04
2012-12-13 08:58:40	40.39	43.12
2012-12-13 09:08:40	40.43	43.14
2012-12-13 09:18:40	40.52	43.25	2012-12-13 09:18:40
2012-12-13 09:28:40	40.59	43.31
2012-12-13 09:38:40	40.63	43.37
2012-12-13 09:48:40	40.71	43.45
2012-12-13 09:58:40	40.47	43.23
2012-12-13 10:08:40	40.72	43.47
2012-12-13 10:18:40	40.83	43.59	2012-12-13 10:18:40
2012-12-13 10:28:40	40.92	43.68
2012-12-13 10:38:40	40.95	43.71
2012-12-13 10:48:40	41.06	43.8
2012-12-13 10:58:40	41.11	43.85
2012-12-13 11:08:40	41.21	43.98
2012-12-13 11:18:40	41.32	44.07	2012-12-13 11:18:40
2012-12-13 11:28:40	41.37	44.13
2012-12-13 11:38:40	41.41	44.17
2012-12-13 11:48:40	41.51	44.26
2012-12-13 11:58:40	41.6	44.37
2012-12-13 12:08:40	41.66	44.43
2012-12-13 12:18:40	41.73	44.49	2012-12-13 12:18:40
2012-12-13 12:28:40	41.78	44.54
2012-12-13 12:38:40	41.83	44.59
2012-12-13 12:48:40	41.93	44.69
2012-12-13 12:58:40	42.02	44.78
2012-12-13 13:08:40	42.11	44.87
2012-12-13 13:18:40	42.19	44.95	2012-12-13 13:18:40
2012-12-13 13:28:40	41.66	44.36
2012-12-13 13:38:40	42.07	44.76
2012-12-13 13:48:40	42.21	44.88
2012-12-13 13:58:40	42.33	44.99
2012-12-13 14:08:40	42.47	45.14
2012-12-13 14:18:40	42.55	45.21	2012-12-13 14:18:40
2012-12-13 14:28:40	42.64	45.3
2012-12-13 14:38:40	42.7	45.37
2012-12-13 14:48:40	42.79	45.44
2012-12-13 14:58:40	42.88	45.54
2012-12-13 15:08:40	42.98	45.64
2012-12-13 15:18:40	43.09	45.75	2012-12-13 15:18:40
2012-12-13 15:28:40	43.17	45.83
2012-12-13 15:38:40	43.25	45.9
2012-12-13 15:48:40	43.35	46
2012-12-13 15:58:40	43.43	46.09
2012-12-13 16:08:40	43.52	46.19
2012-12-13 16:18:40	43.61	46.28	2012-12-13 16:18:40
2012-12-13 16:28:40	43.69	46.35
2012-12-13 16:38:40	43.77	46.43
2012-12-13 16:48:40	43.93	46.58
2012-12-13 16:58:40	44.02	46.68
2012-12-13 17:08:40	44.11	46.78
2012-12-13 17:18:40	44.2	46.87	2012-12-13 17:18:40
2012-12-13 17:28:40	44.31	46.99
2012-12-13 17:38:40	44.39	47.07
2012-12-13 17:48:40	44.49	47.16
2012-12-13 17:58:40	44.59	47.26
2012-12-13 18:08:40	44.7	47.37
2012-12-13 18:18:40	44.78	47.45	2012-12-13 18:18:40
2012-12-13 18:28:40	44.84	47.51
2012-12-13 18:38:40	44.93	47.6
2012-12-13 18:48:40	45.01	47.68
2012-12-13 18:58:40	45.1	47.77
2012-12-13 19:08:40	45.21	47.88
2012-12-13 19:18:40	45.3	47.98	2012-12-13 19:18:40
2012-12-13 19:28:40	45.4	48.06
2012-12-13 19:38:40	45.5	48.17
2012-12-13 19:48:40	45.61	48.28
2012-12-13 19:58:40	45.72	48.4
2012-12-13 20:08:40	45.79	48.48
2012-12-13 20:18:40	45.89	48.6	2012-12-13 20:18:40
2012-12-13 20:28:40	46.04	48.72
2012-12-13 20:38:40	46.12	48.81
2012-12-13 20:48:40	46.23	48.93
2012-12-13 20:58:40	46.33	49.01
2012-12-13 21:08:40	46.42	49.1
2012-12-13 21:18:40	46.5	49.2	2012-12-13 21:18:40
2012-12-13 21:28:40	46.56	49.27
2012-12-13 21:38:40	46.7	49.39
2012-12-13 21:48:40	46.76	49.46
2012-12-13 21:58:40	46.89	49.58
2012-12-13 22:08:40	46.8	49.5
2012-12-13 22:18:40	46.99	49.63	2012-12-13 22:18:40
2012-12-13 22:28:40	47.13	49.83
2012-12-13 22:38:40	47.21	49.9
2012-12-13 22:48:40	47.33	50.02
2012-12-13 22:58:40	47.47	50.17
2012-12-13 23:08:40	47.57	50.27
2012-12-13 23:18:40	47.65	50.37	2012-12-13 23:18:40
2012-12-13 23:28:40	47.78	50.47
2012-12-13 23:38:40	47.89	50.59
2012-12-13 23:48:40	47.98	50.68
2012-12-13 23:58:40	48.1	50.8
2012-12-14 00:08:40	48.19	50.85
2012-12-14 00:18:40	48.3	51.01	2012-12-14 00:18:40
2012-12-14 00:28:40	48.43	51.13
2012-12-14 00:38:40	48.5	51.2
2012-12-14 00:48:40	48.58	51.29
2012-12-14 00:58:40	48.7	51.41
2012-12-14 01:08:40	48.75	51.48
2012-12-14 01:18:40	48.89	51.59	2012-12-14 01:18:40
2012-12-14 01:28:40	48.96	51.68
2012-12-14 01:38:40	49.1	51.8
2012-12-14 01:48:40	49.18	51.89
2012-12-14 01:58:40	49.25	51.97
2012-12-14 02:08:40	49.4	52.1
2012-12-14 02:18:40	49.53	52.23	2012-12-14 02:18:40
2012-12-14 02:28:40	49.6	52.32
2012-12-14 02:38:40	49.71	52.43
2012-12-14 02:48:40	49.83	52.55
2012-12-14 02:58:40	49.95	52.63
2012-12-14 03:08:40	50.09	52.78
2012-12-14 03:18:40	50.16	52.9	2012-12-14 03:18:40
2012-12-14 03:28:40	50.29	52.99
2012-12-14 03:38:40	50.4	53.12
2012-12-14 03:48:40	50.48	53.22
2012-12-14 03:58:40	50.61	53.32
2012-12-14 04:08:40	50.71	53.41
2012-12-14 04:18:40	50.81	53.51	2012-12-14 04:18:40
2012-12-14 04:28:40	50.94	53.66
2012-12-14 04:38:40	51.04	53.75
2012-12-14 04:48:40	51.17	53.85
2012-12-14 04:58:40	51.27	54
2012-12-14 05:08:40	51.39	54.11
2012-12-14 05:18:40	51.48	54.2	2012-12-14 05:18:40
2012-12-14 05:28:40	51.62	54.34
2012-12-14 05:38:40	51.73	54.45
2012-12-14 05:48:40	51.82	54.54
2012-12-14 05:58:40	51.94	54.65
2012-12-14 06:08:40	52.06	54.78
2012-12-14 06:18:40	52.14	54.87	2012-12-14 06:18:40
2012-12-14 06:28:40	52.28	54.99
2012-12-14 06:38:40	52.34	55.09
2012-12-14 06:48:40	52.46	55.2
2012-12-14 06:58:40	52.61	55.33
2012-12-14 07:08:40	52.7	55.45
2012-12-14 07:18:40	52.83	55.55	2012-12-14 07:18:40
2012-12-14 07:28:40	52.95	55.68
2012-12-14 07:38:40	53.06	55.79
2012-12-14 07:48:40	53.18	55.9
2012-12-14 07:58:40	53.24	55.97
2012-12-14 08:08:40	53.25	55.98
2012-12-14 08:18:40	53.32	56.04	2012-12-14 08:18:40
2012-12-14 08:28:40	53.38	56.13
2012-12-14 08:38:40	53.51	56.24
2012-12-14 08:48:40	53.62	56.35
2012-12-14 08:58:40	53.68	56.39
2012-12-14 09:08:40	53.78	56.52
2012-12-14 09:18:40	53.9	56.62	2012-12-14 09:18:40
2012-12-14 09:28:40	53.91	56.65
2012-12-14 09:38:40	54.07	56.82
2012-12-14 09:48:40	54.18	56.93
2012-12-14 09:58:40	54.16	57.04
2012-12-14 10:08:40	54.39	57.11
2012-12-14 10:18:40	54.52	57.27	2012-12-14 10:18:40
2012-12-14 10:28:40	54.62	57.36
2012-12-14 10:38:40	54.72	57.48
2012-12-14 10:48:40	54.78	57.56
2012-12-14 10:58:40	54.94	57.69
2012-12-14 11:08:40	55.07	57.82
2012-12-14 11:18:40	55.14	57.88	2012-12-14 11:18:40
2012-12-14 11:28:40	55.22	57.98
2012-12-14 11:38:40	55.31	58.03
2012-12-14 11:48:40	55.41	58.12
2012-12-14 11:58:40	55.51	58.25
2012-12-14 12:08:40	55.62	58.37
2012-12-14 12:18:40	55.74	58.49	2012-12-14 12:18:40
2012-12-14 12:28:40	55.85	58.59
2012-12-14 12:38:40	55.95	58.7
2012-12-14 12:48:40	55.91	58.81
2012-12-14 12:58:40	56.15	58.9
2012-12-14 13:08:40	56.23	58.99
2012-12-14 13:18:40	56.34	59.1	2012-12-14 13:18:40
2012-12-14 13:28:40	56.45	59.18
2012-12-14 13:38:40	56.56	59.32
2012-12-14 13:48:40	56.66	59.43
2012-12-14 13:58:40	56.67	59.53
2012-12-14 14:08:40	56.9	59.65
2012-12-14 14:18:40	56.95	59.76	2012-12-14 14:18:40
2012-12-14 14:28:40	57.12	59.88
2012-12-14 14:38:40	57.23	59.98
2012-12-14 14:48:40	57.37	60.13
2012-12-14 14:58:40	57.48	60.25
2012-12-14 15:08:40	57.58	60.37
2012-12-14 15:18:40	57.74	60.5	2012-12-14 15:18:40
2012-12-14 15:28:40	57.84	60.6
2012-12-14 15:38:40	57.98	60.73
2012-12-14 15:48:40	58.07	60.85
2012-12-14 15:58:40	58.18	60.94
2012-12-14 16:08:40	58.31	61.08
2012-12-14 16:18:40	58.43	61.19	2012-12-14 16:18:40
2012-12-14 16:28:40	58.57	61.34
2012-12-14 16:38:40	58.66	61.42
2012-12-14 16:48:40	58.77	61.54
2012-12-14 16:58:40	58.91	61.68
2012-12-14 17:08:40	59.03	61.8
2012-12-14 17:18:40	59.16	61.91	2012-12-14 17:18:40
2012-12-14 17:28:40	59.27	62.04
2012-12-14 17:38:40	59.4	62.15
2012-12-14 17:48:40	59.52	62.29
2012-12-14 17:58:40	59.63	62.39
2012-12-14 18:08:40	59.78	62.55
2012-12-14 18:18:40	59.87	62.66	2012-12-14 18:18:40
2012-12-14 18:28:40	59.97	62.75
2012-12-14 18:38:40	60.09	62.86
2012-12-14 18:48:40	60.24	63.03
2012-12-14 18:58:40	60.39	63.17
2012-12-14 19:08:40	60.45	63.26
2012-12-14 19:18:40	60.58	63.38	2012-12-14 19:18:40
2012-12-14 19:28:40	59.95	63.11
2012-12-14 19:38:40	60.6	63.4
2012-12-14 19:48:40	60.81	63.65
2012-12-14 19:58:40	61.01	63.82
2012-12-14 20:08:40	60.54	63.26
2012-12-14 20:18:40	60.94	63.65	2012-12-14 20:18:40
2012-12-14 20:28:40	61.14	63.91
2012-12-14 20:38:40	61.37	64.12
2012-12-14 20:48:40	61.54	64.27
2012-12-14 20:58:40	61.74	64.44
2012-12-14 21:08:40	61.88	64.59
2012-12-14 21:18:40	62.07	64.74	2012-12-14 21:18:40
2012-12-14 21:28:40	62.21	64.92
2012-12-14 21:38:40	62.36	65.07
2012-12-14 21:48:40	62.52	65.24
2012-12-14 21:58:40	62.67	65.42
2012-12-14 22:08:40	62.83	65.55
2012-12-14 22:18:40	63.01	65.76	2012-12-14 22:18:40
2012-12-14 22:28:40	63.19	65.93
2012-12-14 22:38:40	63.32	66.08
2012-12-14 22:48:40	63.48	66.23
2012-12-14 22:58:40	63.62	66.38
2012-12-14 23:08:40	63.78	66.55
2012-12-14 23:18:40	63.92	66.65	2012-12-14 23:18:40
2012-12-14 23:28:40	64.06	66.82
2012-12-14 23:38:40	64.19	66.97
2012-12-14 23:48:40	64.37	67.12
2012-12-14 23:58:40	64.53	67.29
2012-12-15 00:08:40	64.63	67.39
2012-12-15 00:18:40	64.79	67.54	2012-12-15 00:18:40
2012-12-15 00:28:40	64.96	67.74
2012-12-15 00:38:40	65.05	67.88
2012-12-15 00:48:40	65.28	68.06
2012-12-15 00:58:40	65.38	68.15
2012-12-15 01:08:40	65.52	68.32
2012-12-15 01:18:40	65.69	68.47	2012-12-15 01:18:40
2012-12-15 01:28:40	65.72	68.56
2012-12-15 01:38:40	65.97	68.75
2012-12-15 01:48:40	66.15	68.93
2012-12-15 01:58:40	66.29	69.06
2012-12-15 02:08:40	66.44	69.22
2012-12-15 02:18:40	66.57	69.35	2012-12-15 02:18:40
2012-12-15 02:28:40	66.71	69.49
2012-12-15 02:38:40	66.86	69.65
2012-12-15 02:48:40	67.02	69.8
2012-12-15 02:58:40	67.17	69.97
2012-12-15 03:08:40	67.33	70.12
2012-12-15 03:18:40	67.44	70.25	2012-12-15 03:18:40
2012-12-15 03:28:40	67.61	70.38
2012-12-15 03:38:40	67.69	70.49
2012-12-15 03:48:40	67.87	70.66
2012-12-15 03:58:40	68.05	70.83
2012-12-15 04:08:40	68.16	70.97
2012-12-15 04:18:40	68.29	71.11	2012-12-15 04:18:40
2012-12-15 04:28:40	68.45	71.26
2012-12-15 04:38:40	68.56	71.41
2012-12-15 04:48:40	68.66	71.55
2012-12-15 04:58:40	68.88	71.69
2012-12-15 05:08:40	69.05	71.87
2012-12-15 05:18:40	69.17	71.99	2012-12-15 05:18:40
2012-12-15 05:28:40	69.33	72.11
2012-12-15 05:38:40	69.45	72.28
2012-12-15 05:48:40	69.62	72.45
2012-12-15 05:58:40	69.75	72.55
2012-12-15 06:08:40	69.92	72.72
2012-12-15 06:18:40	70.06	72.88	2012-12-15 06:18:40
2012-12-15 06:28:40	70.23	73.03
2012-12-15 06:38:40	70.4	73.23
2012-12-15 06:48:40	70.57	73.4
2012-12-15 06:58:40	70.73	73.56
2012-12-15 07:08:40	70.85	73.68
2012-12-15 07:18:40	71.02	73.85	2012-12-15 07:18:40
2012-12-15 07:28:40	71.19	74.02
2012-12-15 07:38:40	71.27	74.13
2012-12-15 07:48:40	71.46	74.3
2012-12-15 07:58:40	71.6	74.43
2012-12-15 08:08:40	71.75	74.62
2012-12-15 08:18:40	71.93	74.77	2012-12-15 08:18:40
2012-12-15 08:28:40	72.06	74.89
2012-12-15 08:38:40	72.2	75.06
2012-12-15 08:48:40	72.38	75.22
2012-12-15 08:58:40	72.51	75.32
2012-12-15 09:08:40	72.67	75.52
2012-12-15 09:18:40	72.82	75.67	2012-12-15 09:18:40
2012-12-15 09:28:40	72.95	75.81
2012-12-15 09:38:40	73.09	75.94
2012-12-15 09:48:40	73.26	76.14
2012-12-15 09:58:40	73.41	76.25
2012-12-15 10:08:40	73.43	76.38
2012-12-15 10:18:40	73.68	76.56	2012-12-15 10:18:40
2012-12-15 10:28:40	73.82	76.67
2012-12-15 10:38:40	73.98	76.83
2012-12-15 10:48:40	74.12	76.95
2012-12-15 10:58:40	74.27	77.14
2012-12-15 11:08:40	74.45	77.33
2012-12-15 11:18:40	74.6	77.48	2012-12-15 11:18:40
2012-12-15 11:28:40	74.73	77.59
2012-12-15 11:38:40	74.88	77.75
2012-12-15 11:48:40	74.57	77.58
2012-12-15 11:58:40	75.04	77.88
2012-12-15 12:08:40	75.22	78.04
2012-12-15 12:18:40	75.39	78.24	2012-12-15 12:18:40
2012-12-15 12:28:40	75.58	78.42
2012-12-15 12:38:40	75.73	78.56
2012-12-15 12:48:40	75.88	78.73
2012-12-15 12:58:40	76.04	78.9
2012-12-15 13:08:40	76.19	79.08
2012-12-15 13:18:40	76.37	79.24	2012-12-15 13:18:40
2012-12-15 13:28:40	76.54	79.42
2012-12-15 13:38:40	76.72	79.57
2012-12-15 13:48:40	76.86	79.73
2012-12-15 13:58:40	77.02	79.91
2012-12-15 14:08:40	77.17	80.04
2012-12-15 14:18:40	77.32	80.21	2012-12-15 14:18:40
2012-12-15 14:28:40	77.52	80.4
2012-12-15 14:38:40	77.71	80.58
2012-12-15 14:48:40	77.86	80.76
2012-12-15 14:58:40	78	80.92
2012-12-15 15:08:40	78.18	81.08
2012-12-15 15:18:40	78.37	81.27	2012-12-15 15:18:40
2012-12-15 15:28:40	78.54	81.43
2012-12-15 15:38:40	78.69	81.59
2012-12-15 15:48:40	78.87	81.75
2012-12-15 15:58:40	79.04	81.94
2012-12-15 16:08:40	79.23	82.12
2012-12-15 16:18:40	79.39	82.29	2012-12-15 16:18:40
2012-12-15 16:28:40	79.55	82.45
2012-12-15 16:38:40	79.71	82.64
2012-12-15 16:48:40	79.92	82.84
2012-12-15 16:58:40	80.11	83.01
2012-12-15 17:08:40	80.24	83.15
2012-12-15 17:18:40	80.41	83.31	2012-12-15 17:18:40
2012-12-15 17:28:40	80.6	83.5
2012-12-15 17:38:40	80.79	83.71
2012-12-15 17:48:40	80.96	83.86
2012-12-15 17:58:40	81.12	84.07
2012-12-15 18:08:40	81.29	84.25
2012-12-15 18:18:40	81.46	84.38	2012-12-15 18:18:40
2012-12-15 18:28:40	81.64	84.62
2012-12-15 18:38:40	81.88	84.75
2012-12-15 18:48:40	82.08	85.02
2012-12-15 18:58:40	82.23	85.18
2012-12-15 19:08:40	82.44	85.38
2012-12-15 19:18:40	82.62	85.54	2012-12-15 19:18:40
2012-12-15 19:28:40	82.79	85.75
2012-12-15 19:38:40	83.01	85.95
2012-12-15 19:48:40	83.15	86.18
2012-12-15 19:58:40	83.36	86.35
2012-12-15 20:08:40	83.54	86.54
2012-12-15 20:18:40	83.74	86.7	2012-12-15 20:18:40
2012-12-15 20:28:40	83.87	86.88
2012-12-15 20:38:40	84.05	87.08
2012-12-15 20:48:40	84.18	87.26
2012-12-15 20:58:40	84.44	87.45
2012-12-15 21:08:40	84.71	87.7
2012-12-15 21:18:40	84.92	87.9	2012-12-15 21:18:40
2012-12-15 21:28:40	85.11	88.11
2012-12-15 21:38:40	85.31	88.27
2012-12-15 21:48:40	85.51	88.48
2012-12-15 21:58:40	85.62	88.68
2012-12-15 22:08:40	85.81	88.89
2012-12-15 22:18:40	86.07	89.09	2012-12-15 22:18:40
2012-12-15 22:28:40	86.27	89.27
2012-12-15 22:38:40	86.4	89.38
2012-12-15 22:48:40	86.61	89.6
2012-12-15 22:58:40	86.8	89.81
2012-12-15 23:08:40	87.01	90.04
2012-12-15 23:18:40	87.22	90.26	2012-12-15 23:18:40
2012-12-15 23:28:40	87.42	90.49
2012-12-15 23:38:40	87.65	90.7
2012-12-15 23:48:40	87.82	90.92
2012-12-15 23:58:40	88.04	91.09
2012-12-16 00:08:40	88.22	91.32
2012-12-16 00:18:40	88.47	91.55	2012-12-16 00:18:40
2012-12-16 00:28:40	88.64	91.76
2012-12-16 00:38:40	88.88	91.94
2012-12-16 00:48:40	89.09	92.16
2012-12-16 00:58:40	89.28	92.38
2012-12-16 01:08:40	89.53	92.62
2012-12-16 01:18:40	89.74	92.83	2012-12-16 01:18:40
2012-12-16 01:28:40	89.97	93.04
2012-12-16 01:38:40	90.16	93.29
2012-12-16 01:48:40	90.41	93.52
2012-12-16 01:58:40	90.58	93.73
2012-12-16 02:08:40	90.83	93.96
2012-12-16 02:18:40	91.06	94.2	2012-12-16 02:18:40
2012-12-16 02:28:40	91.28	94.41
2012-12-16 02:38:40	91.52	94.64
2012-12-16 02:48:40	91.73	94.85
2012-12-16 02:58:40	91.96	95.11
2012-12-16 03:08:40	92.13	95.32
2012-12-16 03:18:40	92.4	95.55	2012-12-16 03:18:40
2012-12-16 03:28:40	92.49	95.78
2012-12-16 03:38:40	92.84	95.99
2012-12-16 03:48:40	93.08	96.26
2012-12-16 03:58:40	93.3	96.38
2012-12-16 04:08:40	93.51	96.7
2012-12-16 04:18:40	93.69	96.88	2012-12-16 04:18:40
2012-12-16 04:28:40	93.89	97.09
2012-12-16 04:38:40	94.13	97.32
2012-12-16 04:48:40	94.37	97.55
2012-12-16 04:58:40	94.58	97.84
2012-12-16 05:08:40	94.84	98.01
2012-12-16 05:18:40	94.9	98.28	2012-12-16 05:18:40
2012-12-16 05:28:40	95.28	98.52
2012-12-16 05:38:40	95.53	98.74
2012-12-16 05:48:40	95.8	99.01
2012-12-16 05:58:40	96.01	99.26
2012-12-16 06:08:40	96.23	99.48
2012-12-16 06:18:40	96.49	99.75	2012-12-16 06:18:40
2012-12-16 06:28:40	96.7	99.99
2012-12-16 06:38:40	96.95	100.24
2012-12-16 06:48:40	97.19	100.49
2012-12-16 06:58:40	97.43	100.77
2012-12-16 07:08:40	97.68	100.98
2012-12-16 07:18:40	97.91	101.22	2012-12-16 07:18:40
2012-12-16 07:28:40	98.15	101.47
2012-12-16 07:38:40	98.4	101.72
2012-12-16 07:48:40	98.61	101.91
2012-12-16 07:58:40	98.78	102.14
2012-12-16 08:08:40	99.04	102.4
2012-12-16 08:18:40	99.24	102.67	2012-12-16 08:18:40
2012-12-16 08:28:40	99.56	102.88
2012-12-16 08:38:40	99.79	103.16
2012-12-16 08:48:40	100.03	103.35
2012-12-16 08:58:40	100.24	103.65
2012-12-16 09:08:40	100.53	103.94
2012-12-16 09:18:40	100.71	104.12	2012-12-16 09:18:40
2012-12-16 09:28:40	100.91	104.35
2012-12-16 09:38:40	101.21	104.61
2012-12-16 09:48:40	101.42	104.86
2012-12-16 09:58:40	101.62	105.12
2012-12-16 10:08:40	101.88	105.36
2012-12-16 10:18:40	102.16	105.65	2012-12-16 10:18:40
2012-12-16 10:28:40	102.45	105.89
2012-12-16 10:38:40	102.71	106.13
2012-12-16 10:48:40	102.94	106.42
2012-12-16 10:58:40	103.22	106.71
2012-12-16 11:08:40	103.44	106.92
2012-12-16 11:18:40	103.69	107.18	2012-12-16 11:18:40
2012-12-16 11:28:40	103.96	107.46
2012-12-16 11:38:40	104.22	107.72
2012-12-16 11:48:40	104.49	108.01
2012-12-16 11:58:40	104.75	108.28
2012-12-16 12:08:40	105.04	108.58
2012-12-16 12:18:40	105.26	108.84	2012-12-16 12:18:40
2012-12-16 12:28:40	105.54	109.08
2012-12-16 12:38:40	105.79	109.36
2012-12-16 12:48:40	106.1	109.62
2012-12-16 12:58:40	106.34	109.9
2012-12-16 13:08:40	106.59	110.18
2012-12-16 13:18:40	106.85	110.37	2012-12-16 13:18:40
2012-12-16 13:28:40	107.1	110.67
2012-12-16 13:38:40	107.38	110.97
2012-12-16 13:48:40	107.59	111.19
2012-12-16 13:58:40	107.88	111.48
2012-12-16 14:08:40	108.13	111.75
2012-12-16 14:18:40	108.4	112.03	2012-12-16 14:18:40
2012-12-16 14:28:40	108.66	112.34
2012-12-16 14:38:40	108.99	112.48
2012-12-16 14:48:40	108.79	112.55
2012-12-16 14:58:40	109.23	112.87
2012-12-16 15:08:40	109.58	113.2
2012-12-16 15:18:40	109.89	113.5	2012-12-16 15:18:40
2012-12-16 15:28:40	110.16	113.8
2012-12-16 15:38:40	110.52	114.15
2012-12-16 15:48:40	110.79	114.44
2012-12-16 15:58:40	111.06	114.75
2012-12-16 16:08:40	111.34	115.01
2012-12-16 16:18:40	111.63	115.31	2012-12-16 16:18:40
2012-12-16 16:28:40	111.89	115.58
2012-12-16 16:38:40	112.16	115.88
2012-12-16 16:48:40	112.43	116.14
2012-12-16 16:58:40	112.63	116.46
2012-12-16 17:08:40	112.96	116.73
2012-12-16 17:18:40	113.23	117.02	2012-12-16 17:18:40
2012-12-16 17:28:40	113.52	117.28
2012-12-16 17:38:40	113.81	117.58
2012-12-16 17:48:40	114.1	117.85
2012-12-16 17:58:40	114.37	118.16
2012-12-16 18:08:40	114.67	118.47
2012-12-16 18:18:40	114.99	118.81	2012-12-16 18:18:40
2012-12-16 18:28:40	115.27	119.13
2012-12-16 18:38:40	115.54	119.38
2012-12-16 18:48:40	115.83	119.69
2012-12-16 18:58:40	116.14	120.07
2012-12-16 19:08:40	116.45	120.35
2012-12-16 19:18:40	116.74	120.63	2012-12-16 19:18:40
2012-12-16 19:28:40	116.98	120.91
2012-12-16 19:38:40	117.3	121.22
2012-12-16 19:48:40	117.59	121.55
2012-12-16 19:58:40	117.89	121.86
2012-12-16 20:08:40	118.19	122.15
2012-12-16 20:18:40	118.48	122.46	2012-12-16 20:18:40
2012-12-16 20:28:40	118.75	122.79
2012-12-16 20:38:40	119.06	123.08
2012-12-16 20:48:40	119.32	123.4
2012-12-16 20:58:40	119.66	123.72
2012-12-16 21:08:40	119.97	124.05
2012-12-16 21:18:40	120.28	124.34	2012-12-16 21:18:40
2012-12-16 21:28:40	120.57	124.61
2012-12-16 21:38:40	120.87	124.95
2012-12-16 21:48:40	121.12	125.25
2012-12-16 21:58:40	121.4	125.5
2012-12-16 22:08:40	121.69	125.86
2012-12-16 22:18:40	122	126.18	2012-12-16 22:18:40
2012-12-16 22:28:40	122.26	126.49
2012-12-16 22:38:40	122.6	126.74
2012-12-16 22:48:40	122.9	127.15
2012-12-16 22:58:40	123.2	127.41
2012-12-16 23:08:40	123.49	127.77
2012-12-16 23:18:40	123.76	128.03	2012-12-16 23:18:40
2012-12-16 23:28:40	124.08	128.36
2012-12-16 23:38:40	124.31	128.69
2012-12-16 23:48:40	124.65	128.98
2012-12-16 23:58:40	124.96	129.32
2012-12-17 00:08:40	125.25	129.61
2012-12-17 00:18:40	125.58	129.91	2012-12-17 00:18:40
2012-12-17 00:28:40	125.85	130.08
2012-12-17 00:38:40	126.16	130.52
2012-12-17 00:48:40	126.44	130.82
2012-12-17 00:58:40	126.72	131.11
2012-12-17 01:08:40	127.03	131.44
2012-12-17 01:18:40	127.29	131.74	2012-12-17 01:18:40
2012-12-17 01:28:40	127.59	132
2012-12-17 01:38:40	127.86	132.3
2012-12-17 01:48:40	128.11	132.62
2012-12-17 01:58:40	128.45	132.87
2012-12-17 02:08:40	128.7	133.25
2012-12-17 02:18:40	129.03	133.58	2012-12-17 02:18:40
2012-12-17 02:28:40	129.24	133.89
2012-12-17 02:38:40	129.63	134.24
2012-12-17 02:48:40	129.93	134.58
2012-12-17 02:58:40	130.25	134.89
2012-12-17 03:08:40	130.57	135.22
2012-12-17 03:18:40	130.85	135.58	2012-12-17 03:18:40
2012-12-17 03:28:40	131.2	135.93
2012-12-17 03:38:40	131.51	136.23
2012-12-17 03:48:40	131.82	136.54
2012-12-17 03:58:40	132.12	136.9
2012-12-17 04:08:40	132.43	137.21
2012-12-17 04:18:40	132.75	137.58	2012-12-17 04:18:40
2012-12-17 04:28:40	133.06	137.92
2012-12-17 04:38:40	133.39	138.25
2012-12-17 04:48:40	133.69	138.56
2012-12-17 04:58:40	133.99	138.87
2012-12-17 05:08:40	134.29	139.22
2012-12-17 05:18:40	134.59	139.52	2012-12-17 05:18:40
2012-12-17 05:28:40	134.88	139.87
2012-12-17 05:38:40	135.16	140.18
2012-12-17 05:48:40	135.47	140.5
2012-12-17 05:58:40	135.77	140.84
2012-12-17 06:08:40	136.1	141.13
2012-12-17 06:18:40	136.39	141.47	2012-12-17 06:18:40
2012-12-17 06:28:40	136.68	141.85
2012-12-17 06:38:40	137.01	142.17
2012-12-17 06:48:40	137.32	142.52
2012-12-17 06:58:40	137.64	142.83
2012-12-17 07:08:40	137.98	143.15
2012-12-17 07:18:40	138.23	143.52	2012-12-17 07:18:40
2012-12-17 07:28:40	138.59	143.88
2012-12-17 07:38:40	138.91	144.22
2012-12-17 07:48:40	139.19	144.58
2012-12-17 07:58:40	139.51	144.91
2012-12-17 08:08:40	139.89	145.26
2012-12-17 08:18:40	140.21	145.58	2012-12-17 08:18:40
2012-12-17 08:28:40	140.55	145.99
2012-12-17 08:38:40	140.85	146.36
2012-12-17 08:48:40	141.15	146.7
2012-12-17 08:58:40	141.5	147.03
2012-12-17 09:08:40	141.36	147.01
2012-12-17 09:18:40	141.8	147.48	2012-12-17 09:18:40
2012-12-17 09:28:40	142.15	147.8
2012-12-17 09:38:40	142.47	148.13
2012-12-17 09:48:40	142.73	148.47
2012-12-17 09:58:40	143.03	148.76
2012-12-17 10:08:40	143.35	149.13
2012-12-17 10:18:40	143.58	149.45	2012-12-17 10:18:40
2012-12-17 10:28:40	143.88	149.74
2012-12-17 10:38:40	144.18	150.07
2012-12-17 10:48:40	144.47	150.4
2012-12-17 10:58:40	144.34	150.35
2012-12-17 11:08:40	144.55	150.9
2012-12-17 11:18:40	145.07	151.38	2012-12-17 11:18:40
2012-12-17 11:28:40	145.43	151.72
2012-12-17 11:38:40	145.77	152.09
2012-12-17 11:48:40	146.09	152.41
2012-12-17 11:58:40	146.47	152.75
2012-12-17 12:08:40	146.82	153.11
2012-12-17 12:18:40	147.16	153.38	2012-12-17 12:18:40
2012-12-17 12:28:40	147.45	153.76
2012-12-17 12:38:40	147.82	154.09
2012-12-17 12:48:40	148.16	154.41
2012-12-17 12:58:40	148.48	154.74
2012-12-17 13:08:40	148.78	155.08
2012-12-17 13:18:40	149.09	155.41	2012-12-17 13:18:40
2012-12-17 13:28:40	149.32	155.71
2012-12-17 13:38:40	149.66	155.9
2012-12-17 13:48:40	149.94	155.93
2012-12-17 13:58:40	150.26	156.64
2012-12-17 14:08:40	150.52	157.02
2012-12-17 14:18:40	150.79	157.33	2012-12-17 14:18:40
2012-12-17 14:28:40	151.11	157.67
2012-12-17 14:38:40	151.42	157.99
2012-12-17 14:48:40	151.65	158.22
2012-12-17 14:58:40	151.92	158.55
2012-12-17 15:08:40	152.18	158.86
2012-12-17 15:18:40	152.45	159.19	2012-12-17 15:18:40
2012-12-17 15:28:40	152.77	159.53
2012-12-17 15:38:40	153.05	159.83
2012-12-17 15:48:40	153.35	160.16
2012-12-17 15:58:40	153.6	160.48
2012-12-17 16:08:40	153.93	160.78
2012-12-17 16:18:40	154.22	161.12	2012-12-17 16:18:40
2012-12-17 16:28:40	154.55	161.38
2012-12-17 16:38:40	154.79	161.64
2012-12-17 16:48:40	155.15	161.97
2012-12-17 16:58:40	155.41	162.26
2012-12-17 17:08:40	155.72	162.56
2012-12-17 17:18:40	155.97	162.84	2012-12-17 17:18:40
2012-12-17 17:28:40	156.2	163.13
2012-12-17 17:38:40	156.52	163.42
2012-12-17 17:48:40	156.81	163.7
2012-12-17 17:58:40	157.07	163.97
2012-12-17 18:08:40	157.34	164.24
2012-12-17 18:18:40	157.53	164.53	2012-12-17 18:18:40
2012-12-17 18:28:40	157.81	164.79
2012-12-17 18:38:40	158.09	165.02
2012-12-17 18:48:40	158.3	165.3
2012-12-17 18:58:40	158.61	165.57
2012-12-17 19:08:40	158.86	165.8
2012-12-17 19:18:40	159.12	166.13	2012-12-17 19:18:40
2012-12-17 19:28:40	159.38	166.39
2012-12-17 19:38:40	159.59	166.64
2012-12-17 19:48:40	159.89	166.93
2012-12-17 19:58:40	160.14	167.21
2012-12-17 20:08:40	160.35	167.49
2012-12-17 20:18:40	160.6	167.74	2012-12-17 20:18:40
2012-12-17 20:28:40	160.87	168
2012-12-17 20:38:40	161.11	168.23
2012-12-17 20:48:40	161.4	168.5
2012-12-17 20:58:40	161.59	168.77
2012-12-17 21:08:40	161.89	169.04
2012-12-17 21:18:40	162.1	169.28	2012-12-17 21:18:40
2012-12-17 21:28:40	162.37	169.53
2012-12-17 21:38:40	162.53	169.81
2012-12-17 21:48:40	162.86	170.07
2012-12-17 21:58:40	163.12	170.31
2012-12-17 22:08:40	163.33	170.56
2012-12-17 22:18:40	163.59	170.81	2012-12-17 22:18:40
2012-12-17 22:28:40	163.81	171.07
2012-12-17 22:38:40	164.05	171.3
2012-12-17 22:48:40	164.29	171.54
2012-12-17 22:58:40	164.49	171.77
2012-12-17 23:08:40	164.73	172
2012-12-17 23:18:40	164.96	172.27	2012-12-17 23:18:40
2012-12-17 23:28:40	165.18	172.49
2012-12-17 23:38:40	165.38	172.74
2012-12-17 23:48:40	165.64	172.95
2012-12-17 23:58:40	165.8	173.19
2012-12-18 00:08:40	166.02	173.42
2012-12-18 00:18:40	166.26	173.66	2012-12-18 00:18:40
2012-12-18 00:28:40	166.48	173.91
2012-12-18 00:38:40	166.71	174.15
2012-12-18 00:48:40	166.94	174.37
2012-12-18 00:58:40	167.15	174.6
2012-12-18 01:08:40	167.5	174.97
2012-12-18 01:18:40	167.72	175.19	2012-12-18 01:18:40
2012-12-18 01:28:40	167.94	175.41
2012-12-18 01:38:40	168.14	175.62
2012-12-18 01:48:40	168.34	175.85
2012-12-18 01:58:40	168.56	176.04
2012-12-18 02:08:40	168.75	176.29
2012-12-18 02:18:40	168.96	176.52	2012-12-18 02:18:40
2012-12-18 02:28:40	169.18	176.73
2012-12-18 02:38:40	169.36	176.94
2012-12-18 02:48:40	169.57	177.12
2012-12-18 02:58:40	169.81	177.39
2012-12-18 03:08:40	169.97	177.61
2012-12-18 03:18:40	170.2	177.83	2012-12-18 03:18:40
2012-12-18 03:28:40	170.4	177.99
2012-12-18 03:38:40	170.61	178.22
2012-12-18 03:48:40	170.79	178.45
2012-12-18 03:58:40	170.98	178.64
2012-12-18 04:08:40	171.18	178.86
2012-12-18 04:18:40	171.36	179.03	2012-12-18 04:18:40
2012-12-18 04:28:40	171.53	179.25
2012-12-18 04:38:40	171.7	179.47
2012-12-18 04:48:40	171.93	179.67
2012-12-18 04:58:40	172.11	179.88
2012-12-18 05:08:40	172.3	180.07
2012-12-18 05:18:40	172.5	180.27	2012-12-18 05:18:40
2012-12-18 05:28:40	172.68	180.47
2012-12-18 05:38:40	172.86	180.65
2012-12-18 05:48:40	173.05	180.85
2012-12-18 05:58:40	173.23	181.03
2012-12-18 06:08:40	173.4	181.2
2012-12-18 06:18:40	173.58	181.43	2012-12-18 06:18:40
2012-12-18 06:28:40	173.76	181.55
2012-12-18 06:38:40	173.9	181.82
2012-12-18 06:48:40	174.11	182.03
2012-12-18 06:58:40	174.29	182.2
2012-12-18 07:08:40	174.49	182.4
2012-12-18 07:18:40	174.67	182.59	2012-12-18 07:18:40
2012-12-18 07:28:40	174.84	182.77
2012-12-18 07:38:40	175.02	182.96
2012-12-18 07:48:40	175.19	183.14
2012-12-18 07:58:40	175.36	183.32
2012-12-18 08:08:40	175.53	183.5
2012-12-18 08:18:40	175.7	183.67	2012-12-18 08:18:40
2012-12-18 08:28:40	175.86	183.84
2012-12-18 08:38:40	175.55	183.67
2012-12-18 08:48:40	175.81	183.87
2012-12-18 08:58:40	176.03	184.1
2012-12-18 09:08:40	176.24	184.29
2012-12-18 09:18:40	176.37	184.47	2012-12-18 09:18:40
2012-12-18 09:28:40	176.73	184.78
2012-12-18 09:38:40	176.89	184.95
2012-12-18 09:48:40	177.05	185.11
2012-12-18 09:58:40	177.22	185.28
2012-12-18 10:08:40	177.39	185.44
2012-12-18 10:18:40	177.52	185.6	2012-12-18 10:18:40
2012-12-18 10:28:40	177.7	185.77
2012-12-18 10:38:40	177.85	185.92
2012-12-18 10:48:40	177.99	186.06
2012-12-18 10:58:40	178.16	186.22
2012-12-18 11:08:40	178.32	186.39
2012-12-18 11:18:40	178.49	186.56	2012-12-18 11:18:40
2012-12-18 11:28:40	178.62	186.74
2012-12-18 11:38:40	178.8	186.92
2012-12-18 11:48:40	178.9	187.07
2012-12-18 11:58:40	179.09	187.22
2012-12-18 12:08:40	179.23	187.43
2012-12-18 12:18:40	179.42	187.57	2012-12-18 12:18:40
2012-12-18 12:28:40	179.56	187.72
2012-12-18 12:38:40	179.71	187.9
2012-12-18 12:48:40	179.86	188.06
2012-12-18 12:58:40	179.99	188.21
2012-12-18 13:08:40	180.17	188.33
2012-12-18 13:18:40	180.28	188.47	2012-12-18 13:18:40
2012-12-18 13:28:40	180.46	188.73
2012-12-18 13:38:40	180.55	188.86
2012-12-18 13:48:40	180.71	188.99
2012-12-18 13:58:40	180.89	189.11
2012-12-18 14:08:40	181.03	189.35
2012-12-18 14:18:40	181.2	189.47	2012-12-18 14:18:40
2012-12-18 14:28:40	181.22	189.64
2012-12-18 14:38:40	181.48	189.81
2012-12-18 14:48:40	181.62	190
2012-12-18 14:58:40	181.78	190.18
2012-12-18 15:08:40	181.94	190.34
2012-12-18 15:18:40	182.07	190.48	2012-12-18 15:18:40
2012-12-18 15:28:40	182.26	190.68
2012-12-18 15:38:40	182.4	190.87
2012-12-18 15:48:40	182.56	191.03
2012-12-18 15:58:40	182.69	191.21
2012-12-18 16:08:40	182.85	191.36
2012-12-18 16:18:40	182.99	191.53	2012-12-18 16:18:40
2012-12-18 16:28:40	179.34	187.82
2012-12-18 16:38:40	182.72	191.45
2012-12-18 16:48:40	183.09	191.66
2012-12-18 16:58:40	183.26	191.84
2012-12-18 17:08:40	183.41	192.02
2012-12-18 17:18:40	183.6	192.17	2012-12-18 17:18:40
2012-12-18 17:28:40	183.76	192.36
2012-12-18 17:38:40	183.91	192.52
2012-12-18 17:48:40	184.07	192.7
2012-12-18 17:58:40	184.21	192.84
2012-12-18 18:08:40	184.37	193.02
2012-12-18 18:18:40	184.53	193.15	2012-12-18 18:18:40
2012-12-18 18:28:40	184.67	193.34
2012-12-18 18:38:40	184.84	193.48
2012-12-18 18:48:40	184.97	193.67
2012-12-18 18:58:40	185.14	193.83
2012-12-18 19:08:40	185.29	193.97
2012-12-18 19:18:40	185.41	194.17	2012-12-18 19:18:40
2012-12-18 19:28:40	185.53	194.3
2012-12-18 19:38:40	185.69	194.45
2012-12-18 19:48:40	185.82	194.61
2012-12-18 19:58:40	186	194.78
2012-12-18 20:08:40	186.13	194.95
2012-12-18 20:18:40	186.28	195.13	2012-12-18 20:18:40
2012-12-18 20:28:40	186.44	195.28
2012-12-18 20:38:40	186.59	195.42
2012-12-18 20:48:40	186.75	195.62
2012-12-18 20:58:40	186.88	195.75
2012-12-18 21:08:40	187.05	195.94
2012-12-18 21:18:40	187.18	196.1	2012-12-18 21:18:40
2012-12-18 21:28:40	187.36	196.28
2012-12-18 21:38:40	187.52	196.44
2012-12-18 21:48:40	187.66	196.58
2012-12-18 21:58:40	187.81	196.74
2012-12-18 22:08:40	187.97	196.91
2012-12-18 22:18:40	188.08	197.04	2012-12-18 22:18:40
2012-12-18 22:28:40	188.24	197.23
2012-12-18 22:38:40	188.4	197.38
2012-12-18 22:48:40	188.54	197.55
2012-12-18 22:58:40	188.69	197.73
2012-12-18 23:08:40	188.84	197.85
2012-12-18 23:18:40	188.86	198.06	2012-12-18 23:18:40
2012-12-18 23:28:40	189.13	198.23
2012-12-18 23:38:40	189.26	198.38
2012-12-18 23:48:40	189.41	198.56
2012-12-18 23:58:40	189.6	198.71
2012-12-19 00:08:40	189.72	198.9
2012-12-19 00:18:40	189.84	199.04	2012-12-19 00:18:40
2012-12-19 00:28:40	190.02	199.22
2012-12-19 00:38:40	190.17	199.38
2012-12-19 00:48:40	190.3	199.55
2012-12-19 00:58:40	190.44	199.71
2012-12-19 01:08:40	190.58	199.87
2012-12-19 01:18:40	190.7	199.9	2012-12-19 01:18:40
2012-12-19 01:28:40	190.88	200.18
2012-12-19 01:38:40	191.01	200.37
2012-12-19 01:48:40	191.16	200.54
2012-12-19 01:58:40	191.29	200.69
2012-12-19 02:08:40	191.52	201.02
2012-12-19 02:18:40	191.75	201.14	2012-12-19 02:18:40
2012-12-19 02:28:40	191.9	201.34
2012-12-19 02:38:40	192.04	201.51
2012-12-19 02:48:40	192.16	201.7
2012-12-19 02:58:40	192.33	201.87
2012-12-19 03:08:40	192.47	202.04
2012-12-19 03:18:40	192.62	202.2	2012-12-19 03:18:40
2012-12-19 03:28:40	192.77	202.36
2012-12-19 03:38:40	192.93	202.55
2012-12-19 03:48:40	193.06	202.71
2012-12-19 03:58:40	193.22	202.88
2012-12-19 04:08:40	193.35	203.05
2012-12-19 04:18:40	193.51	203.21	2012-12-19 04:18:40
2012-12-19 04:28:40	193.66	203.38
2012-12-19 04:38:40	193.78	203.53
2012-12-19 04:48:40	193.93	203.7
2012-12-19 04:58:40	194.08	203.89
2012-12-19 05:08:40	194.21	204.04
2012-12-19 05:18:40	194.38	204.21	2012-12-19 05:18:40
2012-12-19 05:28:40	194.51	204.37
2012-12-19 05:38:40	194.66	204.54
2012-12-19 05:48:40	194.8	204.71
2012-12-19 05:58:40	194.95	204.89
2012-12-19 06:08:40	195.06	205.04
2012-12-19 06:18:40	195.23	205.22	2012-12-19 06:18:40
2012-12-19 06:28:40	195.35	205.41
2012-12-19 06:38:40	195.55	205.58
2012-12-19 06:48:40	195.68	205.74
2012-12-19 06:58:40	195.8	205.93
2012-12-19 07:08:40	195.84	206.11
2012-12-19 07:18:40	196.09	206.27	2012-12-19 07:18:40
2012-12-19 07:28:40	196.23	206.46
2012-12-19 07:38:40	196.38	206.59
2012-12-19 07:48:40	196.49	206.78
2012-12-19 07:58:40	196.65	206.98
2012-12-19 08:08:40	196.81	207.13
2012-12-19 08:18:40	195.97	206.25	2012-12-19 08:18:40
2012-12-19 08:28:40	196.77	207.05
2012-12-19 08:38:40	196.98	207.27
2012-12-19 08:48:40	197.16	207.47
2012-12-19 08:58:40	197.34	207.67
2012-12-19 09:08:40	197.5	207.89
2012-12-19 09:18:40	197.85	208.28	2012-12-19 09:18:40
2012-12-19 09:28:40	198	208.44
2012-12-19 09:38:40	198.15	208.65
2012-12-19 09:48:40	198.31	208.85
2012-12-19 09:58:40	198.48	209
2012-12-19 10:08:40	198.6	209.2
2012-12-19 10:18:40	198.75	209.35	2012-12-19 10:18:40
2012-12-19 10:28:40	198.88	209.54
2012-12-19 10:38:40	199.04	209.73
2012-12-19 10:48:40	199.19	209.9
2012-12-19 10:58:40	199.34	210.09
2012-12-19 11:08:40	199.51	210.25
2012-12-19 11:18:40	199.55	210.45	2012-12-19 11:18:40
2012-12-19 11:28:40	199.79	210.64
2012-12-19 11:38:40	199.94	210.84
2012-12-19 11:48:40	200.07	211.03
2012-12-19 11:58:40	200.21	211.23
2012-12-19 12:08:40	200.35	211.39
2012-12-19 12:18:40	200.52	211.61	2012-12-19 12:18:40
2012-12-19 12:28:40	200.67	211.74
2012-12-19 12:38:40	200.84	211.99
2012-12-19 12:48:40	200.97	212.18
2012-12-19 12:58:40	201.14	212.39
2012-12-19 13:08:40	201.28	212.59
2012-12-19 13:18:40	201.42	212.79	2012-12-19 13:18:40
2012-12-19 13:28:40	201.6	212.97
2012-12-19 13:38:40	201.74	213.14
2012-12-19 13:48:40	201.85	213.34
2012-12-19 13:58:40	202.04	213.48
2012-12-19 14:08:40	202.15	213.72
2012-12-19 14:18:40	202.16	213.87	2012-12-19 14:18:40
2012-12-19 14:28:40	202.43	214.05
2012-12-19 14:38:40	202.59	214.25
2012-12-19 14:48:40	202.73	214.42
2012-12-19 14:58:40	202.88	214.66
2012-12-19 15:08:40	203.05	214.84
2012-12-19 15:18:40	203.18	215.03	2012-12-19 15:18:40
2012-12-19 15:28:40	203.36	215.25
2012-12-19 15:38:40	203.5	215.45
2012-12-19 15:48:40	203.66	215.59
2012-12-19 15:58:40	203.8	215.8
2012-12-19 16:08:40	203.95	216
2012-12-19 16:18:40	204.1	216.13	2012-12-19 16:18:40
2012-12-19 16:28:40	204.22	216.35
2012-12-19 16:38:40	204.37	216.57
2012-12-19 16:48:40	201.94	210.67
2012-12-19 16:58:40	204.06	215.17
2012-12-19 17:08:40	204.76	216.62
2012-12-19 17:18:40	205	216.94	2012-12-19 17:18:40
2012-12-19 17:28:40	205.18	217.27
2012-12-19 17:38:40	205.36	217.47
2012-12-19 17:48:40	205.55	217.74
2012-12-19 17:58:40	205.7	218.01
2012-12-19 18:08:40	205.92	218.17
2012-12-19 18:18:40	206.07	218.39	2012-12-19 18:18:40
2012-12-19 18:28:40	206.26	218.63
2012-12-19 18:38:40	206.42	218.85
2012-12-19 18:48:40	206.56	219.1
2012-12-19 18:58:40	206.73	219.27
2012-12-19 19:08:40	206.89	219.51
2012-12-19 19:18:40	207.04	219.71	2012-12-19 19:18:40
2012-12-19 19:28:40	207.21	219.91
2012-12-19 19:38:40	207.38	220.08
2012-12-19 19:48:40	207.54	220.32
2012-12-19 19:58:40	207.7	220.51
2012-12-19 20:08:40	207.83	220.72
2012-12-19 20:18:40	207.99	220.88	2012-12-19 20:18:40
2012-12-19 20:28:40	208.16	221.14
2012-12-19 20:38:40	208.33	221.36
2012-12-19 20:48:40	208.51	221.63
2012-12-19 20:58:40	208.68	221.8
2012-12-19 21:08:40	208.84	222.01
2012-12-19 21:18:40	208.95	222.22	2012-12-19 21:18:40
2012-12-19 21:28:40	209.18	222.49
2012-12-19 21:38:40	209.34	222.64
2012-12-19 21:48:40	209.49	222.88
2012-12-19 21:58:40	209.64	223.09
2012-12-19 22:08:40	209.85	223.31
2012-12-19 22:18:40	209.99	223.54	2012-12-19 22:18:40
2012-12-19 22:28:40	210.14	223.74
2012-12-19 22:38:40	210.31	223.93
2012-12-19 22:48:40	210.51	224.14
2012-12-19 22:58:40	210.66	224.34
2012-12-19 23:08:40	210.81	224.54
2012-12-19 23:18:40	210.94	224.74	2012-12-19 23:18:40
2012-12-19 23:28:40	211.09	224.98
2012-12-19 23:38:40	211.25	225.13
2012-12-19 23:48:40	211.4	225.32
2012-12-19 23:58:40	211.48	225.5
2012-12-20 00:08:40	211.69	225.78
2012-12-20 00:18:40	211.81	225.94	2012-12-20 00:18:40
2012-12-20 00:28:40	211.99	226.14
2012-12-20 00:38:40	212.13	226.33
2012-12-20 00:48:40	212.25	226.55
2012-12-20 00:58:40	212.41	226.79
2012-12-20 01:08:40	212.6	227.02
2012-12-20 01:18:40	212.75	227.23	2012-12-20 01:18:40
2012-12-20 01:28:40	212.91	227.42
2012-12-20 01:38:40	213.01	227.59
2012-12-20 01:48:40	213.22	227.82
2012-12-20 01:58:40	213.4	228.05
2012-12-20 02:08:40	213.59	228.3
2012-12-20 02:18:40	213.74	228.52	2012-12-20 02:18:40
2012-12-20 02:28:40	213.89	228.67
2012-12-20 02:38:40	213.98	228.89
2012-12-20 02:48:40	214.18	229.13
2012-12-20 02:58:40	214.34	229.38
2012-12-20 03:08:40	214.48	229.52
2012-12-20 03:18:40	214.64	229.81	2012-12-20 03:18:40
2012-12-20 03:28:40	214.79	230.04
2012-12-20 03:38:40	214.97	230.22
2012-12-20 03:48:40	215.14	230.46
2012-12-20 03:58:40	215.3	230.65
2012-12-20 04:08:40	215.43	230.77
2012-12-20 04:18:40	215.58	231.03	2012-12-20 04:18:40
2012-12-20 04:28:40	215.75	231.22
2012-12-20 04:38:40	215.92	231.38
2012-12-20 04:48:40	216.1	231.59
2012-12-20 04:58:40	216.21	231.86
2012-12-20 05:08:40	216.41	232.04
2012-12-20 05:18:40	216.57	232.32	2012-12-20 05:18:40
2012-12-20 05:28:40	216.69	232.47
2012-12-20 05:38:40	216.88	232.74
2012-12-20 05:48:40	217.02	232.94
2012-12-20 05:58:40	217.09	233.13
2012-12-20 06:08:40	217.33	233.44
2012-12-20 06:18:40	217.49	233.62	2012-12-20 06:18:40
2012-12-20 06:28:40	217.67	233.85
2012-12-20 06:38:40	217.84	234.07
2012-12-20 06:48:40	218	234.3
2012-12-20 06:58:40	217.64	234.49
2012-12-20 07:08:40	218.27	234.69
2012-12-20 07:18:40	218.44	234.73	2012-12-20 07:18:40
2012-12-20 07:28:40	218.49	235.13
2012-12-20 07:38:40	218.69	235.31
2012-12-20 07:48:40	218.85	235.53
2012-12-20 07:58:40	219.01	235.73
2012-12-20 08:08:40	219.11	235.92
2012-12-20 08:18:40	219.24	236.12	2012-12-20 08:18:40
2012-12-20 08:28:40	216.75	233.08
2012-12-20 08:38:40	219.06	235.96
2012-12-20 08:48:40	219.36	236.38
2012-12-20 08:58:40	219.6	236.67
2012-12-20 09:08:40	219.75	237
2012-12-20 09:18:40	219.94	237.2	2012-12-20 09:18:40
2012-12-20 09:28:40	220.12	237.48
2012-12-20 09:38:40	220.3	237.74
2012-12-20 09:48:40	220.5	238.04
2012-12-20 09:58:40	220.66	238.25
2012-12-20 10:08:40	220.82	238.45
2012-12-20 10:18:40	220.97	238.54	2012-12-20 10:18:40
2012-12-20 10:28:40	221.12	238.78
2012-12-20 10:38:40	221.27	238.93
2012-12-20 10:48:40	221.38	239.12
2012-12-20 10:58:40	221.48	239.39
2012-12-20 11:08:40	221.64	239.56
2012-12-20 11:18:40	221.75	239.76	2012-12-20 11:18:40
2012-12-20 11:28:40	221.9	239.98
2012-12-20 11:38:40	221.57	239.62
2012-12-20 11:48:40	222.07	240.32
2012-12-20 11:58:40	222.19	240.61
2012-12-20 12:08:40	222.32	240.79
2012-12-20 12:18:40	219.73	237.46	2012-12-20 12:18:40
2012-12-20 12:28:40	222.05	240.44
2012-12-20 12:38:40	222.38	240.96
2012-12-20 12:48:40	222.61	241.26
2012-12-20 12:58:40	222.84	241.62
2012-12-20 13:08:40	223.07	241.99
2012-12-20 13:18:40	223.31	242.37	2012-12-20 13:18:40
2012-12-20 13:28:40	223.49	242.57
2012-12-20 13:38:40	223.74	243
2012-12-20 13:48:40	223.94	243.27
2012-12-20 13:58:40	224.16	243.54
2012-12-20 14:08:40	224.38	243.79
2012-12-20 14:18:40	224.58	244.12	2012-12-20 14:18:40
2012-12-20 14:28:40	224.76	244.33
2012-12-20 14:38:40	224.95	244.63
2012-12-20 14:48:40	225.16	244.91
2012-12-20 14:58:40	225.33	245.21
2012-12-20 15:08:40	225.5	245.47
2012-12-20 15:18:40	225.75	245.8	2012-12-20 15:18:40
2012-12-20 15:28:40	225.77	245.99
2012-12-20 15:38:40	226.09	246.37
2012-12-20 15:48:40	226.29	246.57
2012-12-20 15:58:40	226.41	246.84
2012-12-20 16:08:40	226.62	247.12
2012-12-20 16:18:40	226.79	247.43	2012-12-20 16:18:40
2012-12-20 16:28:40	226.92	247.65
2012-12-20 16:38:40	227.17	247.91
2012-12-20 16:48:40	227.33	248.18
2012-12-20 16:58:40	227.5	248.33
2012-12-20 17:08:40	227.69	248.65
2012-12-20 17:18:40	227.87	248.94	2012-12-20 17:18:40
2012-12-20 17:28:40	225.35	243.91
2012-12-20 17:38:40	228.16	248.49
2012-12-20 17:48:40	228.58	249.45
2012-12-20 17:58:40	228.83	249.92
2012-12-20 18:08:40	229.07	250.26
2012-12-20 18:18:40	229.24	250.63	2012-12-20 18:18:40
2012-12-20 18:28:40	229.49	250.78
2012-12-20 18:38:40	229.64	251.23
2012-12-20 18:48:40	229.87	251.49
2012-12-20 18:58:40	230	251.75
2012-12-20 19:08:40	230.19	251.98
2012-12-20 19:18:40	230.37	252.27	2012-12-20 19:18:40
2012-12-20 19:28:40	230.56	252.58
2012-12-20 19:38:40	230.73	252.91
2012-12-20 19:48:40	230.91	253.23
2012-12-20 19:58:40	231.15	253.44
2012-12-20 20:08:40	231.3	253.79
2012-12-20 20:18:40	231.49	254.06	2012-12-20 20:18:40
2012-12-20 20:28:40	231.62	254.33
2012-12-20 20:38:40	231.81	254.68
2012-12-20 20:48:40	231.99	254.92
2012-12-20 20:58:40	232.19	255.24
2012-12-20 21:08:40	232.37	255.52
2012-12-20 21:18:40	232.52	255.77	2012-12-20 21:18:40
2012-12-20 21:28:40	232.71	256.03
2012-12-20 21:38:40	232.86	256.27
2012-12-20 21:48:40	233.07	256.68
2012-12-20 21:58:40	233.25	256.97
2012-12-20 22:08:40	233.47	257.22
2012-12-20 22:18:40	233.56	257.53	2012-12-20 22:18:40
2012-12-20 22:28:40	233.77	257.8
2012-12-20 22:38:40	233.98	258.07
2012-12-20 22:48:40	234.14	258.39
2012-12-20 22:58:40	234.33	258.62
2012-12-20 23:08:40	234.5	258.79
2012-12-20 23:18:40	234.64	259.27	2012-12-20 23:18:40
2012-12-20 23:28:40	234.78	259.47
2012-12-20 23:38:40	235.05	259.8
2012-12-20 23:48:40	235.22	260.13
2012-12-20 23:58:40	235.42	260.41
2012-12-21 00:08:40	235.55	260.63
2012-12-21 00:18:40	235.72	260.95	2012-12-21 00:18:40
2012-12-21 00:28:40	235.92	261.24
2012-12-21 00:38:40	236.1	261.62
2012-12-21 00:48:40	236.28	261.94
2012-12-21 00:58:40	236.42	262.24
2012-12-21 01:08:40	236.63	262.52
2012-12-21 01:18:40	236.79	262.82	2012-12-21 01:18:40
2012-12-21 01:28:40	236.93	263.14
2012-12-21 01:38:40	237.15	263.45
2012-12-21 01:48:40	237.34	263.74
2012-12-21 01:58:40	237.52	264.04
2012-12-21 02:08:40	237.69	264.26
2012-12-21 02:18:40	237.87	264.64	2012-12-21 02:18:40
2012-12-21 02:28:40	238.05	264.97
2012-12-21 02:38:40	238.22	265.29
2012-12-21 02:48:40	238.39	265.59
2012-12-21 02:58:40	238.58	265.91
2012-12-21 03:08:40	238.59	266.21
2012-12-21 03:18:40	238.85	266.41	2012-12-21 03:18:40
2012-12-21 03:28:40	239.02	266.75
2012-12-21 03:38:40	239.24	267.15
2012-12-21 03:48:40	239.62	267.69
2012-12-21 03:58:40	239.83	267.89
2012-12-21 04:08:40	239.99	268.31
2012-12-21 04:18:40	240.2	268.66	2012-12-21 04:18:40
2012-12-21 04:28:40	240.35	268.96
2012-12-21 04:38:40	240.51	269.22
2012-12-21 04:48:40	240.71	269.53
2012-12-21 04:58:40	240.93	269.93
2012-12-21 05:08:40	241.12	270.13
2012-12-21 05:18:40	241.28	270.47	2012-12-21 05:18:40
2012-12-21 05:28:40	241.46	270.88
2012-12-21 05:38:40	241.64	271.22
2012-12-21 05:48:40	241.85	271.46
2012-12-21 05:58:40	242.06	271.83
2012-12-21 06:08:40	242.24	272.19
2012-12-21 06:18:40	242.45	272.51	2012-12-21 06:18:40
2012-12-21 06:28:40	242.63	272.86
2012-12-21 06:38:40	242.81	273.29
2012-12-21 06:48:40	242.91	273.61
2012-12-21 06:58:40	243.22	273.88
2012-12-21 07:08:40	243.4	274.15
2012-12-21 07:18:40	243.56	274.51	2012-12-21 07:18:40
2012-12-21 07:28:40	243.76	274.79
2012-12-21 07:38:40	243.92	275.13
2012-12-21 07:48:40	244.14	275.43
2012-12-21 07:58:40	244.28	275.74
2012-12-21 08:08:40	244.35	275.72
2012-12-21 08:18:40	226.49	259.92	2012-12-21 08:18:40
2012-12-21 08:28:40	238.69	270.25
2012-12-21 08:38:40	242.28	273.95
2012-12-21 08:48:40	244.08	275.6
2012-12-21 08:58:40	244.81	276.34
2012-12-21 09:08:40	245.14	277.01
2012-12-21 09:18:40	245.41	277.45	2012-12-21 09:18:40
2012-12-21 09:28:40	245.68	277.97
2012-12-21 09:38:40	245.92	278.38
2012-12-21 09:48:40	246.14	278.82
2012-12-21 09:58:40	246.38	279.26
2012-12-21 10:08:40	246.6	279.58
2012-12-21 10:18:40	246.82	279.94	2012-12-21 10:18:40
2012-12-21 10:28:40	246.97	280.39
2012-12-21 10:38:40	247.25	280.79
2012-12-21 10:48:40	247.46	281.13
2012-12-21 10:58:40	247.58	281.54
2012-12-21 11:08:40	247.85	281.98
2012-12-21 11:18:40	248.1	282.36	2012-12-21 11:18:40
2012-12-21 11:28:40	248.3	282.53
2012-12-21 11:38:40	248.47	283.09
2012-12-21 11:48:40	248.65	283.46
2012-12-21 11:58:40	248.81	283.86
2012-12-21 12:08:40	249.05	284.07
2012-12-21 12:18:40	249.24	284.61	2012-12-21 12:18:40
2012-12-21 12:28:40	249.39	285.04
2012-12-21 12:38:40	249.65	285.38
2012-12-21 12:48:40	249.81	285.87
2012-12-21 12:58:40	250.02	286.17
2012-12-21 13:08:40	250.21	286.56
2012-12-21 13:18:40	250.39	286.94	2012-12-21 13:18:40
2012-12-21 13:28:40	250.48	287.29
2012-12-21 13:38:40	250.68	287.81
2012-12-21 13:48:40	250.96	288.17
2012-12-21 13:58:40	251.11	288.48
2012-12-21 14:08:40	251.39	288.85
2012-12-21 14:18:40	251.5	289.27	2012-12-21 14:18:40
2012-12-21 14:28:40	251.68	289.59
2012-12-21 14:38:40	251.25	289.88
2012-12-21 14:48:40	251.92	290.42
2012-12-21 14:58:40	252.2	290.75
2012-12-21 15:08:40	252.41	291.26
2012-12-21 15:18:40	252.6	291.64	2012-12-21 15:18:40
2012-12-21 15:28:40	252.78	292.2
2012-12-21 15:38:40	253.03	292.58
2012-12-21 15:48:40	253.29	292.88
2012-12-21 15:58:40	253.35	293.38
2012-12-21 16:08:40	253.68	293.65
2012-12-21 16:18:40	253.85	294.16	2012-12-21 16:18:40
2012-12-21 16:28:40	254.11	294.63
2012-12-21 16:38:40	254.29	295.06
2012-12-21 16:48:40	254.48	295.46
2012-12-21 16:58:40	254.66	295.9
2012-12-21 17:08:40	254.66	296.28
2012-12-21 17:18:40	255.07	296.65	2012-12-21 17:18:40
2012-12-21 17:28:40	255.23	297.11
2012-12-21 17:38:40	255.45	297.56
2012-12-21 17:48:40	255.73	297.92
2012-12-21 17:58:40	255.88	298.36
2012-12-21 18:08:40	256.14	298.76
2012-12-21 18:18:40	256.28	299.18	2012-12-21 18:18:40
2012-12-21 18:28:40	256.63	299.32
2012-12-21 18:38:40	254.22	293.66
2012-12-21 18:48:40	256.13	298.23
2012-12-21 18:58:40	256.62	299.93
2012-12-21 19:08:40	256.87	300.89
2012-12-21 19:18:40	257.15	301.47	2012-12-21 19:18:40
2012-12-21 19:28:40	257.38	302.07
2012-12-21 19:38:40	257.61	302.63
2012-12-21 19:48:40	257.76	303.12
2012-12-21 19:58:40	258.06	303.6
2012-12-21 20:08:40	258.26	304.18
2012-12-21 20:18:40	258.53	304.63	2012-12-21 20:18:40
2012-12-21 20:28:40	258.75	304.94
2012-12-21 20:38:40	258.77	305.61
2012-12-21 20:48:40	259.41	306.25
2012-12-21 20:58:40	259.62	306.79
2012-12-21 21:08:40	259.83	307.32
2012-12-21 21:18:40	260.03	307.87	2012-12-21 21:18:40
[truncated: 899 more rows]

## Sheet: Messung-Gewicht
Datum / Zeit	Brutto-Gewicht [g]	Netto-Gewicht [g]	Gewichtsänderung [g]
2012-12-08 18:01:35	607.12	241.42	0
2012-12-09 11:53:48	591.27	225.57	-15.85
2012-12-09 19:48:08	585.18	219.48	-21.94
2012-12-10 09:24:54	574.92	209.22	-32.2
2012-12-10 17:41:20	569.43	203.73	-37.69
2012-12-10 23:11:27	565.73	200.03	-41.39
2012-12-11 11:56:09	556.99	191.29	-50.13
2012-12-11 17:29:21	553.08	187.38	-54.04
2012-12-12 09:22:33	542.84	177.14	-64.28
2012-12-12 17:29:45	537.52	171.82	-69.6
2012-12-13 09:54:31	527.14	161.44	-79.98
2012-12-13 21:59:11	518.69	152.99	-88.43
2012-12-14 09:21:42	510.56	144.86	-96.56
2012-12-14 20:02:03	503.74	138.04	-103.38
2012-12-15 11:47:04	494.32	128.62	-112.8
2012-12-16 14:41:29	479.93	114.23	-127.19
2012-12-17 09:02:40	470.26	104.56	-136.86
2012-12-18 08:29:25	458.07	92.37	-149.05
2012-12-18 16:28:05	454.32	88.62	-152.8
2012-12-19 08:09:25	447.75	82.05	-159.37
2012-12-19 16:42:35	444.39	78.69	-162.73
2012-12-20 08:25:21	439.01	73.31	-168.11
2012-12-20 17:23:53	435.9	70.2	-171.22
2012-12-21 08:15:49	431.23	65.53	-175.89
2012-12-21 18:30:10	428.13	62.43	-178.99
2012-12-22 09:49:55	423.84	58.14	-183.28
2012-12-22 19:19:03	421.4	55.7	-185.72
2012-12-23 08:46:49	418.3	52.6	-188.82
2012-12-25 11:48:46	408.68	42.98	-198.44
2012-12-26 14:42:33	404.3	38.6	-202.82
2012-12-27 12:04:08	401.05	35.35	-206.07
2012-12-27 18:11:53	400.14	34.44	-206.98
2012-12-28 09:43:04	397.89	32.19	-209.23
2012-12-29 09:41:56	394.64	28.94	-212.48
2012-12-31 12:23:17	388.93	23.23	-218.19

## Sheet: Tensionen
Datum / Zeit	Zeit [d]	Tension unten [hPa]	Tension oben [hPa]		Zeit [d]	MP [cm]	MP [cm]
41251.8	0	1.28	3.81		0	-1.30479	-3.88379
41251.8	0.0423611	1.41	3.89		0.0423611	-1.43731	-3.96534
41251.8	0.0840278	1.64	4.12		0.0840278	-1.67176	-4.1998
41251.9	0.125694	2.13	4.63		0.125694	-2.17125	-4.71967
41251.9	0.167361	2.75	5.24		0.167361	-2.80326	-5.34149
41252	0.209028	2.9	5.4		0.209028	-2.95617	-5.50459
41252	0.250694	3.67	6.18		0.250694	-3.74108	-6.29969
41252	0.292361	4.07	6.58		0.292361	-4.14883	-6.70744
41252.1	0.334028	4.6	7.11		0.334028	-4.68909	-7.24771
41252.1	0.375694	5.2	7.72		0.375694	-5.30071	-7.86952
41252.2	0.417361	5.81	8.34		0.417361	-5.92253	-8.50153
41252.2	0.459028	6.45	8.97		0.459028	-6.57492	-9.14373
41252.3	0.500694	6.98	9.51		0.500694	-7.11519	-9.69419
41252.3	0.542361	7.12	9.65		0.542361	-7.2579	-9.8369
41252.3	0.584028	7.83	10.38		0.584028	-7.98165	-10.581
41252.4	0.625694	8.17	10.72		0.625694	-8.32824	-10.9276
41252.4	0.667361	8.67	11.23		0.667361	-8.83792	-11.4475
41252.5	0.709028	9.06	11.58		0.709028	-9.23547	-11.8043
41252.5	0.750694	8.46	10.99		0.750694	-8.62385	-11.2029
41252.5	0.792361	9.58	12.12		0.792361	-9.76555	-12.3547
41252.6	0.834028	10.11	12.65		0.834028	-10.3058	-12.895
41252.6	0.882639	10.59	13.13		0.882639	-10.7951	-13.3843
41252.7	0.93125	10.86	13.41		0.93125	-11.0703	-13.6697
41252.7	0.972917	10.43	12.97		0.972917	-10.632	-13.2212
41252.8	1.01458	11.36	13.88		1.01458	-11.58	-14.1488
41252.8	1.05625	11.82	14.35		1.05625	-12.0489	-14.6279
41252.8	1.09792	12.06	14.62		1.09792	-12.2936	-14.9032
41252.9	1.13958	12.48	15.03		1.13958	-12.7217	-15.3211
41252.9	1.18125	12.89	15.45		1.18125	-13.1397	-15.7492
41253	1.22292	13.32	15.89		1.22292	-13.578	-16.1978
41253	1.26458	13.7	16.27		1.26458	-13.9653	-16.5851
41253.1	1.30625	14.11	16.68		1.30625	-14.3833	-17.0031
41253.1	1.34792	14.5	17.06		1.34792	-14.7808	-17.3904
41253.1	1.38958	14.86	17.43		1.38958	-15.1478	-17.7676
41253.2	1.43125	15.22	17.79		1.43125	-15.5148	-18.1346
41253.2	1.47292	15.59	18.17		1.47292	-15.8919	-18.5219
41253.3	1.51458	15.99	18.56		1.51458	-16.2997	-18.9195
41253.3	1.55625	16.16	18.74		1.55625	-16.473	-19.103
41253.3	1.59792	16.56	19.14		1.59792	-16.8807	-19.5107
41253.4	1.63958	16.88	19.45		1.63958	-17.2069	-19.8267
41253.4	1.68125	17.09	19.66		1.68125	-17.421	-20.0408
41253.5	1.72292	17.33	19.92		1.72292	-17.6656	-20.3058
41253.5	1.76458	17.73	20.31		1.76458	-18.0734	-20.7034
41253.5	1.79829	17.94	20.53		1.79829	-18.2875	-20.9276
41253.6	1.80246	17.99	20.55		1.80246	-18.3384	-20.948
41253.6	1.80662	17.94	20.52		1.80662	-18.2875	-20.9174
41253.6	1.81079	18.02	20.6		1.81079	-18.369	-20.999
41253.6	1.81496	18	20.57		1.81496	-18.3486	-20.9684
41253.6	1.81912	17.92	20.5		1.81912	-18.2671	-20.897
41253.6	1.82329	17.97	20.52		1.82329	-18.318	-20.9174
41253.6	1.82746	18.03	20.6		1.82746	-18.3792	-20.999
41253.6	1.83162	18.05	20.63		1.83162	-18.3996	-21.0296
41253.6	1.83579	18.11	20.69		1.83579	-18.4608	-21.0907
41253.6	1.84621	18.18	20.77		1.84621	-18.5321	-21.1723
41253.6	1.88787	18.61	21.19		1.88787	-18.9704	-21.6004
41253.7	1.92954	18.9	21.48		1.92954	-19.2661	-21.896
41253.7	1.97121	19.29	21.87		1.97121	-19.6636	-22.2936
41253.8	2.01287	19.4	21.98		2.01287	-19.7757	-22.4057
41253.8	2.05454	19.72	22.3		2.05454	-20.1019	-22.7319
41253.8	2.09621	20.13	22.72		2.09621	-20.5199	-23.16
41253.9	2.13787	20.47	23.06		2.13787	-20.8665	-23.5066
41253.9	2.17954	20.82	23.4		2.17954	-21.2232	-23.8532
41254	2.22121	20.74	23.32		2.22121	-21.1417	-23.7717
41254	2.26287	21.38	23.96		2.26287	-21.7941	-24.4241
41254.1	2.30454	21.73	24.3		2.30454	-22.1509	-24.7706
41254.1	2.34621	22.11	24.68		2.34621	-22.5382	-25.158
41254.1	2.38787	22.48	25.07		2.38787	-22.9154	-25.5556
41254.2	2.42954	22.83	25.41		2.42954	-23.2722	-25.9021
41254.2	2.47121	23.18	25.76		2.47121	-23.629	-26.2589
41254.3	2.51287	23.44	26.02		2.51287	-23.894	-26.524
41254.3	2.55454	23.83	26.4		2.55454	-24.2915	-26.9113
41254.3	2.59621	24.18	26.75		2.59621	-24.6483	-27.2681
41254.4	2.63787	24.51	27.08		2.63787	-24.9847	-27.6045
41254.4	2.67954	24.83	27.42		2.67954	-25.3109	-27.9511
41254.5	2.72121	25.2	27.79		2.72121	-25.6881	-28.3282
41254.5	2.76287	25.37	27.93		2.76287	-25.8614	-28.4709
41254.6	2.80454	25.78	28.37		2.80454	-26.2793	-28.9195
41254.6	2.84621	26.14	28.73		2.84621	-26.6463	-29.2864
41254.6	2.88787	26.52	29.11		2.88787	-27.0336	-29.6738
41254.7	2.92954	26.76	29.34		2.92954	-27.2783	-29.9083
41254.7	2.97121	27.19	29.79		2.97121	-27.7166	-30.367
41254.8	3.01287	27.14	29.74		3.01287	-27.6656	-30.316
41254.8	3.05454	27.53	30.12		3.05454	-28.0632	-30.7034
41254.8	3.09621	27.86	30.47		3.09621	-28.3996	-31.0601
41254.9	3.13787	28.26	30.86		3.13787	-28.8073	-31.4577
41254.9	3.17954	28.57	31.16		3.17954	-29.1233	-31.7635
41255	3.22121	28.94	31.54		3.22121	-29.5005	-32.1509
41255	3.26287	29.27	31.88		3.26287	-29.8369	-32.4975
41255.1	3.30454	29.58	32.2		3.30454	-30.1529	-32.8236
41255.1	3.34621	29.88	32.49		3.34621	-30.4587	-33.1193
41255.1	3.38787	30.16	32.77		3.38787	-30.7441	-33.4047
41255.2	3.42954	30.54	33.16		3.42954	-31.1315	-33.8022
41255.2	3.47121	30.86	33.48		3.47121	-31.4577	-34.1284
41255.3	3.51287	31.15	33.75		3.51287	-31.7533	-34.4037
41255.3	3.55454	31.46	34.09		3.55454	-32.0693	-34.7503
41255.3	3.59621	31.74	34.37		3.59621	-32.3547	-35.0357
41255.4	3.63787	32.1	34.74		3.63787	-32.7217	-35.4128
41255.4	3.67954	32.36	35.02		3.67954	-32.9867	-35.6983
41255.5	3.72121	32.71	35.36		3.72121	-33.3435	-36.0449
41255.5	3.76287	33.09	35.73		3.76287	-33.7309	-36.422
41255.6	3.80454	33.4	36.06		3.80454	-34.0469	-36.7584
41255.6	3.84621	33.69	36.34		3.84621	-34.3425	-37.0438
41255.6	3.88787	34.08	36.73		3.88787	-34.7401	-37.4414
41255.7	3.92954	34.39	37.05		3.92954	-35.0561	-37.7676
41255.7	3.97121	34.76	37.41		3.97121	-35.4332	-38.1346
41255.8	4.01287	34.94	37.66		4.01287	-35.6167	-38.3894
41255.8	4.05454	35.25	37.98		4.05454	-35.9327	-38.7156
41255.8	4.09621	35.62	38.35		4.09621	-36.3099	-39.0928
41255.9	4.13787	35.99	38.71		4.13787	-36.6871	-39.4597
41255.9	4.17954	36.37	39.09		4.17954	-37.0744	-39.8471
41256	4.22121	36.72	39.45		4.22121	-37.4312	-40.2141
41256	4.26287	37.13	39.84		4.26287	-37.8491	-40.6116
41256.1	4.30454	37.52	40.23		4.30454	-38.2467	-41.0092
41256.1	4.34621	37.86	40.58		4.34621	-38.5933	-41.366
41256.1	4.38787	38.24	40.95		4.38787	-38.9806	-41.7431
41256.2	4.42954	38.58	41.31		4.42954	-39.3272	-42.1101
41256.2	4.47121	38.96	41.69		4.47121	-39.7146	-42.4975
41256.3	4.51287	39.32	42.04		4.51287	-40.0815	-42.8542
41256.3	4.55454	39.75	42.47		4.55454	-40.5199	-43.2926
41256.3	4.59621	40.06	42.8		4.59621	-40.8359	-43.629
41256.4	4.63787	40.52	43.25		4.63787	-41.3048	-44.0877
41256.4	4.67954	40.83	43.59		4.67954	-41.6208	-44.4343
41256.5	4.72121	41.32	44.07		4.72121	-42.1203	-44.9235
41256.5	4.76287	41.73	44.49		4.76287	-42.5382	-45.3517
41256.6	4.80454	42.19	44.95		4.80454	-43.0071	-45.8206
41256.6	4.84621	42.55	45.21		4.84621	-43.3741	-46.0856
41256.6	4.88787	43.09	45.75		4.88787	-43.9246	-46.6361
41256.7	4.92954	43.61	46.28		4.92954	-44.4546	-47.1764
41256.7	4.97121	44.2	46.87		4.97121	-45.0561	-47.7778
41256.8	5.01287	44.78	47.45		5.01287	-45.6473	-48.369
41256.8	5.05454	45.3	47.98		5.05454	-46.1774	-48.9093
41256.8	5.09621	45.89	48.6		5.09621	-46.7788	-49.5413
41256.9	5.13787	46.5	49.2		5.13787	-47.4006	-50.1529
41256.9	5.17954	46.99	49.63		5.17954	-47.9001	-50.5912
41257	5.22121	47.65	50.37		5.22121	-48.5729	-51.3456
41257	5.26287	48.3	51.01		5.26287	-49.2355	-51.998
41257.1	5.30454	48.89	51.59		5.30454	-49.8369	-52.5892
41257.1	5.34621	49.53	52.23		5.34621	-50.4893	-53.2416
41257.1	5.38787	50.16	52.9		5.38787	-51.1315	-53.9246
41257.2	5.42954	50.81	53.51		5.42954	-51.7941	-54.5464
41257.2	5.47121	51.48	54.2		5.47121	-52.4771	-55.2497
41257.3	5.51287	52.14	54.87		5.51287	-53.1498	-55.9327
41257.3	5.55454	52.83	55.55		5.55454	-53.8532	-56.6259
41257.3	5.59621	53.32	56.04		5.59621	-54.3527	-57.1254
41257.4	5.63787	53.9	56.62		5.63787	-54.9439	-57.7166
41257.4	5.67954	54.52	57.27		5.67954	-55.5759	-58.3792
41257.5	5.72121	55.14	57.88		5.72121	-56.208	-59.001
41257.5	5.76287	55.74	58.49		5.76287	-56.8196	-59.6228
41257.6	5.80454	56.34	59.1		5.80454	-57.4312	-60.2446
41257.6	5.84621	56.95	59.76		5.84621	-58.053	-60.9174
41257.6	5.88787	57.74	60.5		5.88787	-58.8583	-61.6718
41257.7	5.92954	58.43	61.19		5.92954	-59.5617	-62.3751
41257.7	5.97121	59.16	61.91		5.97121	-60.3058	-63.1091
41257.8	6.01287	59.87	62.66		6.01287	-61.0296	-63.8736
41257.8	6.05454	60.58	63.38		6.05454	-61.7533	-64.6075
41257.8	6.09621	60.94	63.65		6.09621	-62.1203	-64.8828
41257.9	6.13787	62.07	64.74		6.13787	-63.2722	-65.9939
41257.9	6.17954	63.01	65.76		6.17954	-64.2304	-67.0336
41258	6.22121	63.92	66.65		6.22121	-65.158	-67.9409
41258	6.26287	64.79	67.54		6.26287	-66.0449	-68.8481
41258.1	6.30454	65.69	68.47		6.30454	-66.9623	-69.7961
41258.1	6.34621	66.57	69.35		6.34621	-67.8593	-70.6932
41258.1	6.38787	67.44	70.25		6.38787	-68.7462	-71.6106
41258.2	6.42954	68.29	71.11		6.42954	-69.6126	-72.4873
41258.2	6.47121	69.17	71.99		6.47121	-70.5097	-73.3843
41258.3	6.51287	70.06	72.88		6.51287	-71.4169	-74.2915
41258.3	6.55454	71.02	73.85		6.55454	-72.3955	-75.2803
41258.3	6.59621	71.93	74.77		6.59621	-73.3231	-76.2181
41258.4	6.63787	72.82	75.67		6.63787	-74.2304	-77.1356
41258.4	6.67954	73.68	76.56		6.67954	-75.107	-78.0428
41258.5	6.72121	74.6	77.48		6.72121	-76.0449	-78.9806
41258.5	6.76287	75.39	78.24		6.76287	-76.8502	-79.7554
41258.6	6.80454	76.37	79.24		6.80454	-77.8491	-80.7747
41258.6	6.84621	77.32	80.21		6.84621	-78.8175	-81.7635
41258.6	6.88787	78.37	81.27		6.88787	-79.8879	-82.844
41258.7	6.92954	79.39	82.29		6.92954	-80.9276	-83.8838
41258.7	6.97121	80.41	83.31		6.97121	-81.9674	-84.9235
41258.8	7.01287	81.46	84.38		7.01287	-83.0377	-86.0143
41258.8	7.05454	82.62	85.54		7.05454	-84.2202	-87.1967
41258.8	7.09621	83.74	86.7		7.09621	-85.3619	-88.3792
41258.9	7.13787	84.92	87.9		7.13787	-86.5647	-89.6024
41258.9	7.17954	86.07	89.09		7.17954	-87.737	-90.8155
41259	7.22121	87.22	90.26		7.22121	-88.9093	-92.0082
41259	7.26287	88.47	91.55		7.26287	-90.1835	-93.3231
41259.1	7.30454	89.74	92.83		7.30454	-91.4781	-94.6279
41259.1	7.34621	91.06	94.2		7.34621	-92.8236	-96.0245
41259.1	7.38787	92.4	95.55		7.38787	-94.1896	-97.4006
41259.2	7.42954	93.69	96.88		7.42954	-95.5046	-98.7564
41259.2	7.47121	94.9	98.28		7.47121	-96.738	-100.183
41259.3	7.51287	96.49	99.75		7.51287	-98.3588	-101.682
41259.3	7.55454	97.91	101.22		7.55454	-99.8063	-103.18
41259.3	7.59621	99.24	102.67		7.59621	-101.162	-104.659
41259.4	7.63787	100.71	104.12		7.63787	-102.661	-106.137
41259.4	7.67954	102.16	105.65		7.67954	-104.139	-107.696
41259.5	7.72121	103.69	107.18		7.72121	-105.698	-109.256
41259.5	7.76287	105.26	108.84		7.76287	-107.299	-110.948
41259.6	7.80454	106.85	110.37		7.80454	-108.919	-112.508
41259.6	7.84621	108.4	112.03		7.84621	-110.499	-114.2
41259.6	7.88787	109.89	113.5		7.88787	-112.018	-115.698
41259.7	7.92954	111.63	115.31		7.92954	-113.792	-117.543
41259.7	7.97121	113.23	117.02		7.97121	-115.423	-119.286
41259.8	8.01287	114.99	118.81		8.01287	-117.217	-121.111
41259.8	8.05454	116.74	120.63		8.05454	-119.001	-122.966
41259.8	8.09621	118.48	122.46		8.09621	-120.775	-124.832
41259.9	8.13787	120.28	124.34		8.13787	-122.61	-126.748
41259.9	8.17954	122	126.18		8.17954	-124.363	-128.624
41260	8.22121	123.76	128.03		8.22121	-126.157	-130.51
41260	8.26287	125.58	129.91		8.26287	-128.012	-132.426
41260.1	8.30454	127.29	131.74		8.30454	-129.755	-134.292
41260.1	8.34621	129.03	133.58		8.34621	-131.529	-136.167
41260.1	8.38787	130.85	135.58		8.38787	-133.384	-138.206
41260.2	8.42954	132.75	137.58		8.42954	-135.321	-140.245
41260.2	8.47121	134.59	139.52		8.47121	-137.197	-142.222
41260.3	8.51287	136.39	141.47		8.51287	-139.032	-144.21
41260.3	8.55454	138.23	143.52		8.55454	-140.907	-146.3
41260.3	8.59621	140.21	145.58		8.59621	-142.926	-148.4
41260.4	8.63787	141.8	147.48		8.63787	-144.546	-150.336
41260.4	8.67954	143.58	149.45		8.67954	-146.361	-152.345
41260.5	8.72121	145.07	151.38		8.72121	-147.88	-154.312
41260.5	8.76287	147.16	153.38		8.76287	-150.01	-156.351
41260.6	8.80454	149.09	155.41		8.80454	-151.978	-158.42
41260.6	8.84621	150.79	157.33		8.84621	-153.71	-160.377
41260.6	8.88787	152.45	159.19		8.88787	-155.403	-162.273
41260.7	8.92954	154.22	161.12		8.92954	-157.207	-164.241
41260.7	8.97121	155.97	162.84		8.97121	-158.991	-165.994
41260.8	9.01287	157.53	164.53		9.01287	-160.581	-167.717
41260.8	9.05454	159.12	166.13		9.05454	-162.202	-169.348
41260.8	9.09621	160.6	167.74		9.09621	-163.71	-170.989
41260.9	9.13787	162.1	169.28		9.13787	-165.24	-172.559
41260.9	9.17954	163.59	170.81		9.17954	-166.758	-174.118
41261	9.22121	164.96	172.27		9.22121	-168.155	-175.607
41261	9.26287	166.26	173.66		9.26287	-169.48	-177.023
41261.1	9.30454	167.72	175.19		9.30454	-170.968	-178.583
41261.1	9.34621	168.96	176.52		9.34621	-172.232	-179.939
41261.1	9.38787	170.2	177.83		9.38787	-173.496	-181.274
41261.2	9.42954	171.36	179.03		9.42954	-174.679	-182.497
41261.2	9.47121	172.5	180.27		9.47121	-175.841	-183.761
41261.3	9.51287	173.58	181.43		9.51287	-176.942	-184.944
41261.3	9.55454	174.67	182.59		9.55454	-178.053	-186.126
41261.3	9.59621	175.7	183.67		9.59621	-179.103	-187.227
41261.4	9.63787	176.37	184.47		9.63787	-179.786	-188.043
41261.4	9.67954	177.52	185.6		9.67954	-180.958	-189.195
41261.5	9.72121	178.49	186.56		9.72121	-181.947	-190.173
41261.5	9.76287	179.42	187.57		9.76287	-182.895	-191.203
41261.6	9.80454	180.28	188.47		9.80454	-183.772	-192.12
41261.6	9.84621	181.2	189.47		9.84621	-184.709	-193.14
41261.6	9.88787	182.07	190.48		9.88787	-185.596	-194.169
41261.7	9.92954	182.99	191.53		9.92954	-186.534	-195.24
41261.7	9.97121	183.6	192.17		9.97121	-187.156	-195.892
41261.8	10.0129	184.53	193.15		10.0129	-188.104	-196.891
41261.8	10.0545	185.41	194.17		10.0545	-189.001	-197.931
41261.8	10.0962	186.28	195.13		10.0962	-189.888	-198.909
41261.9	10.1379	187.18	196.1		10.1379	-190.805	-199.898
41261.9	10.1795	188.08	197.04		10.1795	-191.723	-200.856
41262	10.2212	188.86	198.06		10.2212	-192.518	-201.896
41262	10.2629	189.84	199.04		10.2629	-193.517	-202.895
41262.1	10.3045	190.7	199.9		10.3045	-194.393	-203.772
41262.1	10.3462	191.75	201.14		10.3462	-195.464	-205.036
41262.1	10.3879	192.62	202.2		10.3879	-196.351	-206.116
41262.2	10.4295	193.51	203.21		10.4295	-197.258	-207.146
41262.2	10.4712	194.38	204.21		10.4712	-198.145	-208.165
41262.3	10.5129	195.23	205.22		10.5129	-199.011	-209.195
41262.3	10.5545	196.09	206.27		10.5545	-199.888	-210.265
41262.3	10.5962	195.97	206.25		10.5962	-199.766	-210.245
41262.4	10.6379	197.85	208.28		10.6379	-201.682	-212.314
41262.4	10.6795	198.75	209.35		10.6795	-202.599	-213.405
41262.5	10.7212	199.55	210.45		10.7212	-203.415	-214.526
41262.5	10.7629	200.52	211.61		10.7629	-204.404	-215.708
41262.6	10.8045	201.42	212.79		10.8045	-205.321	-216.911
41262.6	10.8462	202.16	213.87		10.8462	-206.075	-218.012
41262.6	10.8879	203.18	215.03		10.8879	-207.115	-219.195
41262.7	10.9295	204.1	216.13		10.9295	-208.053	-220.316
41262.7	10.9712	205	216.94		10.9712	-208.97	-221.142
41262.8	11.0129	206.07	218.39		11.0129	-210.061	-222.62
41262.8	11.0545	207.04	219.71		11.0545	-211.05	-223.965
41262.8	11.0962	207.99	220.88		11.0962	-212.018	-225.158
41262.9	11.1379	208.95	222.22		11.1379	-212.997	-226.524
41262.9	11.1795	209.99	223.54		11.1795	-214.057	-227.87
41263	11.2212	210.94	224.74		11.2212	-215.025	-229.093
41263	11.2629	211.81	225.94		11.2629	-215.912	-230.316
41263.1	11.3045	212.75	227.23		11.3045	-216.871	-231.631
41263.1	11.3462	213.74	228.52		11.3462	-217.88	-232.946
41263.1	11.3879	214.64	229.81		11.3879	-218.797	-234.261
41263.2	11.4295	215.58	231.03		11.4295	-219.755	-235.505
41263.2	11.4712	216.57	232.32		11.4712	-220.765	-236.82
41263.3	11.5129	217.49	233.62		11.5129	-221.702	-238.145
41263.3	11.5545	218.44	234.73		11.5545	-222.671	-239.276
41263.3	11.5962	219.24	236.12		11.5962	-223.486	-240.693
41263.4	11.6379	219.94	237.2		11.6379	-224.2	-241.794
41263.4	11.6795	220.97	238.54		11.6795	-225.25	-243.16
41263.5	11.7212	221.75	239.76		11.7212	-226.045	-244.404
41263.5	11.7629	219.73	237.46		11.7629	-223.986	-242.059
41263.6	11.8045	223.31	242.37		11.8045	-227.635	-247.064
41263.6	11.8462	224.58	244.12		11.8462	-228.93	-248.848
41263.6	11.8879	225.75	245.8		11.8879	-230.122	-250.561
41263.7	11.9295	226.79	247.43		11.9295	-231.182	-252.222
41263.7	11.9712	227.87	248.94		11.9712	-232.283	-253.761
41263.8	12.0129	229.24	250.63		12.0129	-233.68	-255.484
41263.8	12.0545	230.37	252.27		12.0545	-234.832	-257.156
41263.8	12.0962	231.49	254.06		12.0962	-235.973	-258.981
41263.9	12.1379	232.52	255.77		12.1379	-237.023	-260.724
41263.9	12.1795	233.56	257.53		12.1795	-238.084	-262.518
41264	12.2212	234.64	259.27		12.2212	-239.185	-264.292
41264	12.2629	235.72	260.95		12.2629	-240.285	-266.004
41264.1	12.3045	236.79	262.82		12.3045	-241.376	-267.91
41264.1	12.3462	237.87	264.64		12.3462	-242.477	-269.766
41264.1	12.3879	238.85	266.41		12.3879	-243.476	-271.57
41264.2	12.4295	240.2	268.66		12.4295	-244.852	-273.863
41264.2	12.4712	241.28	270.47		12.4712	-245.953	-275.708
41264.3	12.5129	242.45	272.51		12.5129	-247.146	-277.788
41264.3	12.5545	243.56	274.51		12.5545	-248.277	-279.827
41264.3	12.5962	226.49	259.92		12.5962	-230.877	-264.954
41264.4	12.6379	245.41	277.45		12.6379	-250.163	-282.824
41264.4	12.6795	246.82	279.94		12.6795	-251.6	-285.362
41264.5	12.7212	248.1	282.36		12.7212	-252.905	-287.829
41264.5	12.7629	249.24	284.61		12.7629	-254.067	-290.122
41264.6	12.8045	250.39	286.94		12.8045	-255.24	-292.497
41264.6	12.8462	251.5	289.27		12.8462	-256.371	-294.873
41264.6	12.8879	252.6	291.64		12.8879	-257.492	-297.288
41264.7	12.9295	253.85	294.16		12.9295	-258.767	-299.857
41264.7	12.9712	255.07	296.65		12.9712	-260.01	-302.396
41264.8	13.0129	256.28	299.18		13.0129	-261.244	-304.975
41264.8	13.0545	257.15	301.47		13.0545	-262.13	-307.309
41264.8	13.0962	258.53	304.63		13.0962	-263.537	-310.53
41264.9	13.1379	260.03	307.87		13.1379	-265.066	-313.833
41264.9	13.1795	261.3	310.44		13.1795	-266.361	-316.453
41265	13.2212	262.4	313.39		13.2212	-267.482	-319.46
41265	13.2629	263.76	316.37		13.2629	-268.869	-322.497
41265.1	13.3045	264.77	319.35		13.3045	-269.898	-325.535
41265.1	13.3462	266.26	322.25		13.3462	-271.417	-328.491
41265.1	13.3879	267.5	325.24		13.3879	-272.681	-331.539
41265.2	13.4295	268.85	328.16		13.4295	-274.057	-334.516
41265.2	13.4712	270.13	331.44		13.4712	-275.362	-337.859
41265.3	13.5129	271.44	334.62		13.5129	-276.697	-341.101
41265.3	13.5545	272.67	337.66		13.5545	-277.951	-344.2
41265.3	13.5962	273.91	341.12		13.5962	-279.215	-347.727
41265.4	13.6379	275.26	344.6		13.6379	-280.591	-351.274
41265.4	13.6795	277.16	346.52		13.6795	-282.528	-353.231
41265.5	13.7212	278.64	351.08		13.7212	-284.037	-357.88
41265.5	13.7629	280	354.45		13.7629	-285.423	-361.315
41265.6	13.8045	281.32	357.97		13.8045	-286.769	-364.903
41265.6	13.8462	282.65	361.96		13.8462	-288.124	-368.97
41265.6	13.8879	283.93	365.8		13.8879	-289.429	-372.885
41265.7	13.9295	285.38	369.75		13.9295	-290.907	-376.911
41265.7	13.9712	286.63	373.56		13.9712	-292.181	-380.795
41265.8	14.0129	288.05	378.01		14.0129	-293.629	-385.331
41265.8	14.0615	284.84	373.27		14.0615	-290.357	-380.499
41265.9	14.1032	291.43	386.79		14.1032	-297.074	-394.281
41265.9	14.1448	293.04	392.23		14.1448	-298.716	-399.827
41265.9	14.1865	294.65	397.01		14.1865	-300.357	-404.699
41266	14.2282	296.22	401.14		14.2282	-301.957	-408.909
41266	14.2698	297.65	405.12		14.2698	-303.415	-412.966
41266.1	14.3115	299.2	410.75		14.3115	-304.995	-418.705
41266.1	14.3532	300.64	415.25		14.3532	-306.463	-423.293
41266.1	14.3948	302.22	419.69		14.3948	-308.073	-427.819
41266.2	14.4365	303.81	424.64		14.4365	-309.694	-432.864
41266.2	14.4782	305.38	429.96		14.4782	-311.295	-438.287
41266.3	14.5198	306.96	435.08		14.5198	-312.905	-443.507
41266.3	14.5615	308.67	440.47		14.5615	-314.648	-449.001
41266.4	14.6032	310.21	445.41		14.6032	-316.218	-454.037
41266.4	14.6448	310.81	442.85		14.6448	-316.83	-451.427
41266.4	14.6865	314.41	455.85		14.6865	-320.499	-464.679
41266.5	14.7282	316.52	463.37		14.7282	-322.65	-472.345
41266.5	14.7698	318.41	469.84		14.7698	-324.577	-478.94
41266.6	14.8115	320.09	476.31		14.8115	-326.29	-485.535
41266.6	14.8532	321.63	481.47		14.8532	-327.859	-490.795
41266.6	14.8948	323.63	488.66		14.8948	-329.898	-498.124
41266.7	14.9365	325.22	494.75		14.9365	-331.519	-504.332
41266.7	14.9782	327.32	501.87		14.9782	-333.66	-511.59
41266.8	15.0198	328.98	507.91		15.0198	-335.352	-517.747
41266.8	15.0615	330.68	514.05		15.0615	-337.085	-524.006
41266.9	15.1032	332.2	520.38		15.1032	-338.634	-530.459
41266.9	15.1448	334.26	527.15		15.1448	-340.734	-537.36
41266.9	15.1865	336.13	533.85		15.1865	-342.64	-544.19
41267	15.2282	338.1	540.86		15.2282	-344.648	-551.335
41267	15.2698	340.02	548.55		15.2698	-346.606	-559.174
41267.1	15.3115	342.35	556.52		15.3115	-348.981	-567.299
41267.1	15.3532	344.74	564.78		15.3532	-351.417	-575.719
41267.1	15.3948	346.96	573.36		15.3948	-353.68	-584.465
41267.2	15.4365	349.12	581.9		15.4365	-355.882	-593.17
41267.2	15.4782	351.37	589.98		15.4782	-358.175	-601.407
41267.3	15.5198	353.82	598.52		15.5198	-360.673	-610.112
41267.3	15.5615	355.75	607.66		15.5615	-362.64	-619.429
41267.4	15.6032	358.46	617.57		15.6032	-365.403	-629.531
41267.4	15.6448	361.06	626.82		15.6448	-368.053	-638.96
41267.4	15.6865	363.6	636.59		15.6865	-370.642	-648.919
41267.5	15.7282	365.79	647.29		15.7282	-372.875	-659.827
41267.5	15.7698	368.31	657.77		15.7698	-375.443	-670.51
41267.6	15.8115	371.47	668.44		15.8115	-378.665	-681.386
41267.6	15.8532	374.51	680.48		15.8532	-381.764	-693.66
41267.6	15.8948	377.23	692.25		15.8948	-384.536	-705.657
41267.7	15.9365	379.77	703.62		15.9365	-387.125	-717.248
41267.7	15.9782	382.62	714.74		15.9782	-390.031	-728.583
41267.8	16.0198	385.17	726.81		16.0198	-392.63	-740.887
41267.8	16.0615	388.06	738.29		16.0615	-395.576	-752.589
41267.9	16.1032	391.08	751.4		16.1032	-398.654	-765.953
41267.9	16.1448	394.1	764.75		16.1448	-401.733	-779.562
41267.9	16.1865	397.39	778.91		16.1865	-405.087	-793.996
41268	16.2282	400.13	793.01		16.2282	-407.88	-808.369
41268	16.2698	403.16	808.59		16.2698	-410.968	-824.251
41268.1	16.3115	406.53	824.65		16.3115	-414.404	-840.622
41268.1	16.3532	409.85	840.65		16.3532	-417.788	-856.932
41268.1	16.3948	413.32	857.43		16.3948	-421.325	-874.037
41268.2	16.4365	416.83	875.72		16.4365	-424.903	-892.681
41268.2	16.4782	419.96	894.42		16.4782	-428.094	-911.743
41268.3	16.5198	423.86	912.07		16.5198	-432.069	-929.735
41268.3	16.5615	427.09	932.67		16.5615	-435.362	-950.734
41268.4	16.6032	431.13	955.14		16.6032	-439.48	-973.639
41268.4	16.6448	434.79	976.14		16.6448	-443.211	-995.046
41268.4	16.6865	439.04	998.78		16.6865	-447.543	-1018.12
41268.5	16.7282	442.75	1021.12		16.7282	-451.325	-1040.9
41268.5	16.7698	443.74	1041.34		16.7698	-452.334	-1061.51
41268.6	16.8115	454.75	1068.7		16.8115	-463.558	-1089.4
41268.6	16.8532	459.62	1094.66		16.8532	-468.522	-1115.86
41268.6	16.8948	463.75	1117.63		16.8948	-472.732	-1139.28
41268.7	16.9365	468.52	1147.27		16.9365	-477.594	-1169.49
41268.7	16.9782	473.63	1178.08		16.9782	-482.803	-1200.9
41268.8	17.0198	478.49	1208.86		17.0198	-487.757	-1232.27
41268.8	17.0615	483.65	1240.75		17.0615	-493.017	-1264.78
41268.9	17.1032	488.28	1273.64		17.1032	-497.737	-1298.31
41268.9	17.1448	493.21	1305.71		17.1448	-502.762	-1331
41268.9	17.1865	498.22			17.1865	-507.87
41269	17.2282	502.62			17.2282	-512.355
41269	17.2698	507.54			17.2698	-517.37
41269.1	17.3115	512			17.3115	-521.916
41269.1	17.3532	517.58			17.3532	-527.604
41269.1	17.3948	522.83			17.3948	-532.956
41269.2	17.4365	527.97			17.4365	-538.196
41269.2	17.4782	533.54			17.4782	-543.874
41269.3	17.5198	539.31			17.5198	-549.755
41269.3	17.5615	545.01			17.5615	-555.566
41269.4	17.6032	550.92			17.6032	-561.59
41269.4	17.6448	557.48			17.6448	-568.277
41269.4	17.6865	563.86			17.6865	-574.781
41269.5	17.7282	570.21			17.7282	-581.254
41269.5	17.7698	575.86			17.7698	-587.013
41269.6	17.8115	582.2			17.8115	-593.476
41269.6	17.8532	588.88			17.8532	-600.285
41269.6	17.8948	591.39			17.8948	-602.844
41269.7	17.9365	603.31			17.9365	-614.995
41269.7	17.9782	611.52			17.9782	-623.364
41269.8	18.0198	619.62			18.0198	-631.621
41269.8	18.0615	626.82			18.0615	-638.96
41269.9	18.1032	634.57			18.1032	-646.86
41269.9	18.1448	642.13			18.1448	-654.567
41269.9	18.1865	650.01			18.1865	-662.599
41270	18.2282	657.74			18.2282	-670.479
41270	18.2698	665.8			18.2698	-678.695
41270.1	18.3115	674.21			18.3115	-687.268
41270.1	18.3532	682.39			18.3532	-695.607
41270.1	18.3948	689.51			18.3948	-702.864
41270.2	18.4365	697.56			18.4365	-711.07
41270.2	18.4782	705.54			18.4782	-719.205
41270.3	18.5198	714.38			18.5198	-728.216
41270.3	18.5615	723.05			18.5615	-737.054
41270.4	18.6032	732.75			18.6032	-746.942
41270.4	18.6448	743.4			18.6448	-757.798
41270.4	18.6865	754.02			18.6865	-768.624
41270.5	18.7282	764.62			18.7282	-779.429
41270.5	18.7698	726.45			18.7698	-740.52
41270.6	18.8115	800.56			18.8115	-816.065
41270.6	18.8532	824.9			18.8532	-840.877
41270.6	18.8948	840.24			18.8948	-856.514
41270.7	18.9365	855.32			18.9365	-871.886
41270.7	18.9782	867.86			18.9782	-884.669
41270.8	19.0198	879.43			19.0198	-896.463
41270.8	19.0615	911.48			19.0615	-929.134
41270.9	19.1032	926.9			19.1032	-944.852
41270.9	19.1448	940.3			19.1448	-958.512
41270.9	19.1865	954.06			19.1865	-972.538
41271	19.2282	968.39			19.2282	-987.146
41271	19.2698	984.75			19.2698	-1003.82
41271.1	19.3115	1000.87			19.3115	-1020.25
41271.1	19.3532	1019.4			19.3532	-1039.14

## Sheet: Gewicht
Datum / Zeit	Tage [d]	Zeitintervall	Brutto-Gewicht [g]	Netto-Gewicht [g]	Gewichtsänderung [g]	Gewichtsabnahme Probe [g]	Abnahme rate [g]	Verdunstung [cm]	Verdunstungsrate [cm/d]	cum. Verdunstung [cm]		Volumen	237.8
41251.8	0	0.744594	607.12	241.42	0	242.41						Höhe	5
41252.5	0.744594	0.329394	591.27	225.57	-15.85	226.56	15.85	0.333263	0.447577	0.333263		A	47.56
41252.8	1.07399	0.567204	585.18	219.48	-21.94	220.47	6.09	0.128049	0.388741	0.461312		Theta0	0.961396
41253.4	1.64119	0.344743	574.92	209.22	-32.2	210.21	10.26	0.215728	0.380335	0.67704
41253.7	1.98593	0.229249	569.43	203.73	-37.69	204.72	5.49	0.115433	0.334839	0.792473
41254	2.21518	0.531043	565.73	200.03	-41.39	201.02	3.7	0.0777965	0.339353	0.870269
41254.5	2.74623	0.231392	556.99	191.29	-50.13	192.28	8.74	0.183768	0.346051	1.05404
41254.7	2.97762	0.661942	553.08	187.38	-54.04	188.37	3.91	0.0822119	0.355293	1.13625
41255.4	3.63956	0.338328	542.84	177.14	-64.28	178.13	10.24	0.215307	0.325266	1.35156
41255.7	3.97789	0.683867	537.52	171.82	-69.6	172.81	5.32	0.111859	0.330622	1.46341
41256.4	4.66176	0.503248	527.14	161.44	-79.98	162.43	10.38	0.218251	0.319142	1.68167
41256.9	5.165	0.473964	518.69	152.99	-88.43	153.98	8.45	0.17767	0.353047	1.85934
41257.4	5.63897	0.444691	510.56	144.86	-96.56	145.85	8.13	0.170942	0.360665	2.03028
41257.8	6.08366	0.656258	503.74	138.04	-103.38	139.03	6.82	0.143398	0.322467	2.17368
41258.5	6.73992	1.12112	494.32	128.62	-112.8	129.61	9.42	0.198066	0.301811	2.37174
41259.6	7.86104	0.764706	479.93	114.23	-127.19	115.22	14.39	0.302565	0.269876	2.67431
41260.4	8.62575	0.976913	470.26	104.56	-136.86	105.55	9.67	0.203322	0.265883	2.87763
41261.4	9.60266	0.332405	458.07	92.37	-149.05	93.36	12.19	0.256308	0.262365	3.13394
41261.7	9.93506	0.653703	454.32	88.62	-152.8	89.61	3.75	0.0788478	0.237204	3.21278
41262.3	10.5888	0.35637	447.75	82.05	-159.37	83.04	6.57	0.138141	0.211321	3.35093
41262.7	10.9451	0.654696	444.39	78.69	-162.73	79.68	3.36	0.0706476	0.198242	3.42157
41263.4	11.5998	0.373979	439.01	73.31	-168.11	74.3	5.38	0.11312	0.172783	3.53469
41263.7	11.9738	0.619406	435.9	70.2	-171.22	71.19	3.11	0.0653911	0.174852	3.60008
41264.3	12.5932	0.426628	431.23	65.53	-175.89	66.52	4.67	0.0981918	0.158526	3.69828
41264.8	13.0198	0.638715	428.13	62.43	-178.99	63.42	3.1	0.0651808	0.152781	3.76346
41265.4	13.6586	0.395229	423.84	58.14	-183.28	59.13	4.29	0.0902019	0.141224	3.85366
41265.8	14.0538	0.560954	421.4	55.7	-185.72	56.69	2.44	0.0513036	0.129807	3.90496
41266.4	14.6147	2.12635	418.3	52.6	-188.82	53.59	3.1	0.0651808	0.116196	3.97014
41268.5	16.7411	1.12069	408.68	42.98	-198.44	43.97	9.62	0.202271	0.0951256	4.17241
41269.6	17.8618	0.889986	404.3	38.6	-202.82	39.59	4.38	0.0920942	0.0821767	4.26451
41270.5	18.7518	0.255383	401.05	35.35	-206.07	36.34	3.25	0.0683347	0.0767818	4.33284
41270.8	19.0072	0.646657	400.14	34.44	-206.98	35.43	0.91	0.0191337	0.0749217	4.35198
41271.4	19.6538		397.89	32.19	-209.23	33.18	2.25	0.0473087	0.0731589	4.39929

## Sheet: Spline Stützpunkte
Datum / Zeit	Tension unten [hPa]	Tension oben [hPa]	Netto-Gewicht [g]
2012-12-08 17:51:08	3.88359	1.30204	241.589
2012-12-08 17:53:39	3.87884	1.29185	241.548
2012-12-08 18:01:13	4.11547	1.5629	241.426
2012-12-08 18:13:50	3.91417	1.3719	241.223
2012-12-08 18:31:30	3.91729	1.38359	240.939
2012-12-08 18:54:12	3.94846	1.41743	240.575
2012-12-08 19:21:57	4.00932	1.47776	240.133
2012-12-08 19:54:45	4.1668	1.63649	239.613
2012-12-08 20:32:36	4.4471	1.90462	239.016
2012-12-08 21:15:29	4.87753	2.3328	238.345
2012-12-08 22:03:26	5.33855	2.79641	237.6
2012-12-08 22:56:24	5.45862	2.90205	236.785
2012-12-08 23:54:26	6.21764	3.65386	235.899
2012-12-09 00:57:31	6.7346	4.17647	234.947
2012-12-09 02:05:38	7.29129	4.72587	233.929
2012-12-09 03:18:48	8.06072	5.49815	232.848
2012-12-09 04:37:00	8.88792	6.3097	231.706
2012-12-09 06:00:16	9.68475	7.1032	230.506
2012-12-09 07:28:34	10.27	7.6879	229.249
2012-12-09 09:01:55	10.9346	8.33152	227.939
2012-12-09 10:40:19	11.7322	9.13039	226.576
2012-12-09 12:23:45	11.756	9.16494	225.165
2012-12-09 14:12:15	12.974	10.3723	223.735
2012-12-09 16:05:47	13.5281	10.9394	222.284
2012-12-09 18:04:21	14.0125	11.4381	220.79
2012-12-09 20:07:59	14.8203	12.2007	219.227
2012-12-09 22:16:39	15.7533	13.1412	217.58
2012-12-10 00:30:22	16.6818	14.048	215.861
2012-12-10 02:49:08	17.5606	14.94	214.086
2012-12-10 05:12:56	18.4507	15.8287	212.273
2012-12-10 07:41:48	19.2709	16.6385	210.446
2012-12-10 10:15:42	19.9965	17.3611	208.632
2012-12-10 12:54:38	20.81	18.1823	206.859
2012-12-10 15:38:38	21.7019	19.0796	205.078
2012-12-10 18:27:40	22.4892	19.8562	203.213
2012-12-10 21:21:45	23.5358	20.8914	201.266
2012-12-11 00:20:53	24.4456	21.812	199.245
2012-12-11 03:25:04	25.5981	22.9548	197.155
2012-12-11 06:34:17	26.6634	24.0468	194.997
2012-12-11 09:48:33	27.797	25.1646	192.766
2012-12-11 13:07:52	28.8323	26.1995	190.449
2012-12-11 16:32:14	30.0696	27.427	188.034
2012-12-11 20:01:38	30.9886	28.3255	185.686
2012-12-11 23:36:05	32.2651	29.5933	183.372
2012-12-12 03:15:35	33.3906	30.7245	181.048
2012-12-12 07:00:07	34.6275	31.933	178.67
2012-12-12 10:49:43	35.8663	33.1632	176.191
2012-12-12 14:44:21	37.2183	34.5197	173.617
2012-12-12 18:44:02	38.539	35.7747	171.027
2012-12-12 22:48:45	40.0305	37.2553	168.466
2012-12-13 02:58:32	41.6196	38.8341	165.881
2012-12-13 07:13:21	43.2704	40.4876	163.197
2012-12-13 11:33:13	45.0024	42.1857	160.332
2012-12-13 15:58:08	46.9773	44.2638	157.262
2012-12-13 20:28:05	49.6572	46.9224	154.067
2012-12-14 01:03:05	52.4379	49.6633	150.787
2012-12-14 05:43:08	55.5456	52.77	147.402
2012-12-14 10:28:14	58.4663	55.6707	144.118
2012-12-14 15:18:22	61.6681	58.8518	140.991
2012-12-14 20:13:33	64.6384	61.8738	137.921
2012-12-15 01:13:47	69.7274	66.8885	134.848
2012-12-15 06:19:04	74.2976	71.4205	131.792
2012-12-15 11:29:23	79.1033	76.1858	128.787
2012-12-15 16:44:46	84.3666	81.3804	125.856
2012-12-15 22:05:10	90.5371	87.3931	122.972
2012-12-16 03:30:38	97.6775	94.3243	120.105
2012-12-16 09:01:09	105.735	102.249	117.218
2012-12-16 14:36:42	114.638	111.074	114.272
2012-12-16 20:17:18	124.787	120.733	111.267
2012-12-17 02:02:57	135.601	131.046	108.231
2012-12-17 07:53:38	147.548	142.039	105.162
2012-12-17 13:49:22	158.961	152.863	102.041
2012-12-17 19:50:09	170.206	163.025	98.8568
2012-12-18 01:55:59	179.395	171.764	95.6716
2012-12-18 08:06:52	187.021	178.896	92.5544
2012-12-18 14:22:47	193.207	184.716	89.5659
2012-12-18 20:43:45	199.309	190.286	86.7622
2012-12-19 03:09:46	205.971	196.211	84.0781
2012-12-19 09:40:49	212.737	202.019	81.4344
2012-12-19 16:16:55	220.289	208.026	78.8483
2012-12-19 22:58:05	228.673	214.728	76.4917
2012-12-20 05:44:16	237.366	221.167	74.2234
2012-12-20 12:35:31	245.506	226.604	71.8512
2012-12-20 19:31:48	257.576	235.078	69.5024
2012-12-21 02:33:08	270.25	242.736	67.2883
2012-12-21 09:39:31	283.809	250.7	65.1004
2012-12-21 16:50:57	301.283	259.456	62.9165
2012-12-22 00:07:25	321.669	268.628	60.8139
2012-12-22 07:28:56	344.879	278.167	58.7726
2012-12-22 14:55:30	371.402	288.998	56.8019
2012-12-22 22:27:06	404.586	300.312	54.9427
2012-12-23 06:03:46	441.235	312.243	53.1871
2012-12-23 13:45:28	487.327	326.827	51.5623
2012-12-23 21:32:13	537.736	340.834	49.995
2012-12-24 05:24:00	600.745	358.028	48.4705
2012-12-24 13:20:51	680.387	378.325	46.982
2012-12-24 21:22:44	778.527	401.421	45.522
2012-12-25 05:29:40	912.003	428.127	44.0822
2012-12-25 13:41:38	1095.81	464.529	42.6557
2012-12-25 21:58:40	1349.6	505.155	41.2693

## Sheet: Auswertung-Retention Θ(pF)
pF [-]	Water Content [Vol%]
0.414	96.2
0.351	96.19
0.377	96.16
0.385	96.09
0.366	95.98
0.37	95.85
0.38	95.68
0.402	95.48
0.44	95.24
0.496	94.98
0.558	94.68
0.593	94.35
0.639	93.99
0.701	93.61
0.747	93.19
0.796	92.75
0.849	92.28
0.897	91.79
0.934	91.27
0.964	90.73
0.997	90.17
1.016	89.59
1.04	88.99
1.075	88.39
1.094	87.77
1.116	87.12
1.143	86.45
1.171	85.74
1.197	85.01
1.221	84.25
1.243	83.49
1.262	82.72
1.28	81.97
1.299	81.22
1.317	80.45
1.335	79.65
1.355	78.82
1.374	77.95
1.394	77.06
1.413	76.14
1.431	75.18
1.449	74.19
1.465	73.18
1.481	72.2
1.498	71.23
1.514	70.24
1.53	69.22
1.546	68.16
1.562	67.07
1.578	65.99
1.596	64.91
1.613	63.8
1.63	62.63
1.649	61.38
1.671	60.07
1.696	58.7
1.721	57.3
1.745	55.9
1.768	54.55
1.79	53.25
1.818	51.96
1.848	50.67
1.876	49.39
1.904	48.15
1.934	46.92
1.966	45.71
2	44.5
2.035	43.28
2.071	42.03
2.107	40.76
2.143	39.47
2.177	38.17
2.207	36.85
2.233	35.51
2.253	34.18
2.269	32.9
2.283	31.68
2.296	30.53
2.31	29.41
2.324	28.31
2.338	27.27
2.353	26.29
2.366	25.32
2.382	24.33
2.4	23.37
2.417	22.44
2.436	21.52
2.457	20.62
2.48	19.75
2.503	18.91
2.529	18.1
2.556	17.34
2.585	16.63
2.616	15.96
2.649	15.31
2.686	14.68
2.726	14.06
2.772	13.45
2.825	12.84

## Sheet: Auswertung-Leitfähigkeit K(pF)
pF [-]	log 10 K [cm/d]
2.207	-1.09
2.233	-1.17
2.253	-1.23
2.269	-1.29
2.283	-1.35
2.296	-1.42
2.31	-1.48
2.324	-1.56
2.338	-1.68
2.353	-1.77
2.366	-1.84
2.382	-1.93
2.4	-2.05
2.417	-2.16
2.436	-2.26
2.457	-2.39
2.48	-2.52
2.503	-2.63
2.529	-2.77
2.556	-2.89
2.585	-3.03
2.616	-3.14
2.649	-3.25
2.686	-3.36
2.726	-3.47
2.772	-3.58
2.825	-3.7

## Sheet: Auswertung-Leitfähigkeit K(Θ)
Water Content [Vol%]	log 10 K [cm/d]
36.85	-1.09
35.51	-1.17
34.18	-1.23
32.9	-1.29
31.68	-1.35
30.53	-1.42
29.41	-1.48
28.31	-1.56
27.27	-1.68
26.29	-1.77
25.32	-1.84
24.33	-1.93
23.37	-2.05
22.44	-2.16
21.52	-2.26
20.62	-2.39
19.75	-2.52
18.91	-2.63
18.1	-2.77
17.34	-2.89
16.63	-3.03
15.96	-3.14
15.31	-3.25
14.68	-3.36
14.06	-3.47
13.45	-3.58
12.84	-3.7

## Sheet: Fitting-Statistische Analyse
Bezeichnung	Wert
RMSE_Theta	-
RMSE_logK	-
AICc	-
