# Supplementary material for: A pore-size classification for peat bogs derived from unsaturated hydraulic properties
Source: Copernicus journal article supplement (doi:10.5194/hess-21-6185-2017), 2017-12-07
Supplement: Supplementary file 18 [file A331_7_HYDRUS.xlsx]

## Sheet: Gewicht
Datum / Zeit	Brutto-Gewicht [g]	Netto-Gewicht [g]	Gewichtsänderung [g]	Zeit [d]	Theta [-]	Verdunstungsrate [cm/d]		Volumen	247.3
2012-12-08 18:05:11	615.47	250.47	0					Höhe	5
2012-12-09 11:55:23	600.28	235.28	-15.19	0.743196	0.906672	0.413238		A	49.46
2012-12-09 19:49:27	594.29	229.29	-21.18	1.07241	0.88245	0.367867		Theta0	0.968095
2012-12-10 09:26:24	584.05	219.05	-31.42	1.63973	0.841043	0.364936		Trockengewicht	11.06
2012-12-10 17:43:13	578.89	213.89	-36.58	1.98475	0.820178	0.302381		Ks (as in Ksat)
2012-12-10 23:13:30	575.57	210.57	-39.9	2.21411	0.806753	0.292663		delta System [g]	365
2012-12-11 11:58:32	567.81	202.81	-47.66	2.74538	0.775374	0.295319
2012-12-11 17:31:03	564.3	199.3	-51.17	2.9763	0.761181	0.307323
2012-12-12 09:24:32	553.83	188.83	-61.64	3.63844	0.718844	0.319699
2012-12-12 17:29:12	548.52	183.52	-66.95	3.97501	0.697372	0.318984
2012-12-13 09:56:03	538.26	173.26	-77.21	4.66032	0.655884	0.302694
2012-12-13 22:00:58	530.13	165.13	-85.34	5.16374	0.623008	0.326521
2012-12-14 09:23:34	522.83	157.83	-92.64	5.63777	0.59349	0.311358
2012-12-14 20:03:50	516.24	151.24	-99.23	6.0824	0.566842	0.299663
2012-12-15 11:45:56	507.21	142.21	-108.26	6.73664	0.530328	0.279061
2012-12-16 14:39:45	493.05	128.05	-122.42	7.85734	0.473069	0.255457
2012-12-17 09:04:23	483.47	118.47	-132	8.62445	0.434331	0.252495
2012-12-18 08:28:32	471.49	106.49	-143.98	9.59956	0.385888	0.2484
2012-12-18 16:29:44	467.58	102.58	-147.89	9.93371	0.370077	0.236575
2012-12-19 08:10:47	459.83	94.83	-155.64	10.5872	0.338738	0.239769
2012-12-19 16:43:50	455.62	90.62	-159.85	10.9435	0.321715	0.238911
2012-12-20 08:26:42	447.92	82.92	-167.55	11.5983	0.290578	0.237763
2012-12-20 17:24:50	443.23	78.23	-172.24	11.972	0.271613	0.253744
2012-12-21 08:16:43	435.77	70.77	-179.7	12.5913	0.241448	0.243521
2012-12-21 18:29:11	430.5	65.5	-184.97	13.0167	0.220137	0.250516
2012-12-22 09:49:04	422.88	57.88	-192.59	13.6555	0.189325	0.241178
2012-12-22 19:17:58	418.78	53.78	-196.69	14.0506	0.172746	0.20982
2012-12-23 08:49:16	413.85	48.85	-201.62	14.6139	0.15281	0.17692
2012-12-25 11:49:19	400.65	35.65	-214.82	16.739	0.0994339	0.125589
2012-12-26 14:43:00	395.63	30.63	-219.84	17.8596	0.0791347	0.0905724
2012-12-27 12:04:31	392.11	27.11	-223.36	18.7495	0.0649009	0.0799702
2012-12-27 18:12:13	391.2	26.2	-224.27	19.0049	0.0612212	0.0720537
2012-12-28 09:43:21	388.89	23.89	-226.58	19.6515	0.0518803	0.0722275
2012-12-29 09:41:38	385.8	20.8	-229.67	20.6503	0.0393854	0.06255
2012-12-31 12:23:35	380.68	15.68	-234.79	22.7628	0.0186818	0.0490032

## Sheet: Tensionen
Datum / Zeit	Tension unten [hPa]	Tension oben [hPa]	Zeit [d]	MP bot(2) [cm]	MP top(1) [cm]		WÄGUNG START
2012-12-08 17:51:08	2.88	5.34	-0.00975658	-2.93578	-5.44343		41251.8	-6.04485
2012-12-08 17:52:08	2.89	5.34	-0.00906214	-2.94597	-5.44343		2012-12-08 18:05:11
2012-12-08 17:53:08	2.88	5.33	-0.00836769	-2.93578	-5.43323
2012-12-08 17:54:08	2.89	5.33	-0.00767325	-2.94597	-5.43323
2012-12-08 17:55:08	2.9	5.33	-0.0069788	-2.95617	-5.43323
2012-12-08 17:56:08	2.9	5.34	-0.00628436	-2.95617	-5.44343
2012-12-08 17:57:08	2.9	5.34	-0.00558992	-2.95617	-5.44343
2012-12-08 17:58:08	2.9	5.35	-0.00489547	-2.95617	-5.45362
2012-12-08 17:59:08	2.9	5.32	-0.00420103	-2.95617	-5.42304
2012-12-08 18:00:08	2.9	5.34	-0.00350658	-2.95617	-5.44343
2012-12-08 18:01:08	2.9	5.34	-0.00281214	-2.95617	-5.44343
2012-12-08 18:02:08	2.91	5.34	-0.00211769	-2.96636	-5.44343
2012-12-08 18:03:08	2.9	5.34	-0.00142325	-2.95617	-5.44343
2012-12-08 18:04:08	2.9	5.33	-0.000728805	-2.95617	-5.43323
2012-12-08 18:05:08	3.08	5.93	-3.43605e-05	-3.13965	-6.04485
2012-12-08 18:06:08	3.06	5.46	0.000660084	-3.11927	-5.56575
2012-12-08 18:07:08	2.85	5.27	0.00135453	-2.9052	-5.37207
2012-12-08 18:08:08	2.84	5.26	0.00204897	-2.89501	-5.36188
2012-12-08 18:09:08	2.84	5.27	0.00274342	-2.89501	-5.37207
2012-12-08 18:10:08	2.84	5.28	0.00343786	-2.89501	-5.38226
2012-12-08 18:11:08	2.87	5.28	0.00413231	-2.92559	-5.38226	2012-12-08 18:11:08
2012-12-08 18:12:08	2.88	5.31	0.00482675	-2.93578	-5.41284
2012-12-08 18:13:08	2.89	5.3	0.0055212	-2.94597	-5.40265
2012-12-08 18:14:08	2.89	5.32	0.00621564	-2.94597	-5.42304
2012-12-08 18:15:08	2.9	5.33	0.00691008	-2.95617	-5.43323
2012-12-08 18:16:08	2.91	5.34	0.00760453	-2.96636	-5.44343
2012-12-08 18:17:08	2.92	5.34	0.00829897	-2.97655	-5.44343
2012-12-08 18:18:08	2.93	5.35	0.00899342	-2.98675	-5.45362
2012-12-08 18:19:08	2.92	5.35	0.00968786	-2.97655	-5.45362
2012-12-08 18:20:08	2.93	5.35	0.0103823	-2.98675	-5.45362
2012-12-08 18:21:08	2.92	5.35	0.0110768	-2.97655	-5.45362
2012-12-08 18:22:08	2.93	5.35	0.0117712	-2.98675	-5.45362
2012-12-08 18:23:08	2.92	5.35	0.0124656	-2.97655	-5.45362
2012-12-08 18:24:08	2.94	5.34	0.0131601	-2.99694	-5.44343
2012-12-08 18:25:08	2.95	5.33	0.0138545	-3.00714	-5.43323
2012-12-08 18:26:08	2.95	5.33	0.014549	-3.00714	-5.43323
2012-12-08 18:27:08	2.95	5.34	0.0152434	-3.00714	-5.44343
2012-12-08 18:28:08	2.94	5.36	0.0159379	-2.99694	-5.46381
2012-12-08 18:29:08	2.95	5.33	0.0166323	-3.00714	-5.43323
2012-12-08 18:30:08	2.94	5.37	0.0173268	-2.99694	-5.47401
2012-12-08 18:31:08	2.94	5.37	0.0180212	-2.99694	-5.47401
2012-12-08 18:32:08	2.94	5.36	0.0187156	-2.99694	-5.46381
2012-12-08 18:33:08	2.94	5.37	0.0194101	-2.99694	-5.47401
2012-12-08 18:34:08	2.94	5.37	0.0201045	-2.99694	-5.47401
2012-12-08 18:35:08	2.94	5.37	0.020799	-2.99694	-5.47401
2012-12-08 18:36:08	2.94	5.37	0.0214934	-2.99694	-5.47401
2012-12-08 18:37:08	2.94	5.37	0.0221879	-2.99694	-5.47401
2012-12-08 18:38:08	2.96	5.34	0.0228823	-3.01733	-5.44343
2012-12-08 18:39:08	2.95	5.38	0.0235768	-3.00714	-5.4842
2012-12-08 18:40:08	2.95	5.38	0.0242712	-3.00714	-5.4842
2012-12-08 18:41:08	2.95	5.37	0.0249656	-3.00714	-5.47401
2012-12-08 18:42:08	2.95	5.38	0.0256601	-3.00714	-5.4842
2012-12-08 18:43:08	2.95	5.38	0.0263545	-3.00714	-5.4842
2012-12-08 18:44:08	2.95	5.38	0.027049	-3.00714	-5.4842
2012-12-08 18:45:08	2.97	5.35	0.0277434	-3.02752	-5.45362
2012-12-08 18:46:08	2.96	5.37	0.0284379	-3.01733	-5.47401
2012-12-08 18:47:08	2.96	5.39	0.0291323	-3.01733	-5.49439
2012-12-08 18:48:08	2.97	5.38	0.0298268	-3.02752	-5.4842
2012-12-08 18:49:08	2.95	5.39	0.0305212	-3.00714	-5.49439
2012-12-08 18:50:08	2.97	5.38	0.0312156	-3.02752	-5.4842
2012-12-08 18:51:08	2.96	5.39	0.0319101	-3.01733	-5.49439
2012-12-08 19:01:08	2.95	5.38	0.0388545	-3.00714	-5.4842
2012-12-08 19:11:08	2.96	5.39	0.045799	-3.01733	-5.49439	2012-12-08 19:11:08
2012-12-08 19:21:08	2.95	5.39	0.0527434	-3.00714	-5.49439
2012-12-08 19:31:08	2.99	5.37	0.0596879	-3.04791	-5.47401
2012-12-08 19:41:08	2.97	5.4	0.0666323	-3.02752	-5.50459
2012-12-08 19:51:08	2.99	5.42	0.0735768	-3.04791	-5.52497
2012-12-08 20:01:08	3	5.44	0.0805212	-3.0581	-5.54536
2012-12-08 20:11:08	3.03	5.47	0.0874656	-3.08869	-5.57594	2012-12-08 20:11:08
2012-12-08 20:21:08	3.07	5.51	0.0944101	-3.12946	-5.61672
2012-12-08 20:31:08	3.13	5.56	0.101355	-3.19062	-5.66769
2012-12-08 20:41:08	3.19	5.64	0.108299	-3.25178	-5.74924
2012-12-08 20:51:08	3.29	5.74	0.115243	-3.35372	-5.85117
2012-12-08 21:01:08	3.43	5.87	0.122188	-3.49643	-5.98369
2012-12-08 21:11:08	3.63	6.06	0.129132	-3.70031	-6.17737	2012-12-08 21:11:08
2012-12-08 21:21:08	3.84	6.29	0.136077	-3.91437	-6.41182
2012-12-08 21:31:08	3.95	6.4	0.143021	-4.0265	-6.52396
2012-12-08 21:41:08	4.14	6.59	0.149966	-4.22018	-6.71764
2012-12-08 21:51:08	4.29	6.74	0.15691	-4.37309	-6.87054
2012-12-08 22:01:08	4.5	6.95	0.163855	-4.58716	-7.08461
2012-12-08 22:11:08	4.43	6.88	0.170799	-4.5158	-7.01325	2012-12-08 22:11:08
2012-12-08 22:21:08	4.29	6.72	0.177743	-4.37309	-6.85015
2012-12-08 22:31:08	4.41	6.87	0.184688	-4.49541	-7.00306
2012-12-08 22:41:08	4.44	6.86	0.191632	-4.52599	-6.99286
2012-12-08 22:51:08	4.33	6.75	0.198577	-4.41386	-6.88073
2012-12-08 23:01:08	4	6.47	0.205521	-4.07747	-6.59531
2012-12-08 23:11:08	4.1	6.68	0.212466	-4.17941	-6.80938	2012-12-08 23:11:08
2012-12-08 23:21:08	4.02	6.49	0.21941	-4.09786	-6.6157
2012-12-08 23:31:08	4.17	6.66	0.226355	-4.25076	-6.78899
2012-12-08 23:41:08	4.37	6.83	0.233299	-4.45464	-6.96228
2012-12-08 23:51:08	4.54	7.01	0.240243	-4.62793	-7.14577
2012-12-09 00:01:08	4.52	6.94	0.247188	-4.60754	-7.07441
2012-12-09 00:11:08	4.68	7.15	0.254132	-4.77064	-7.28848	2012-12-09 00:11:08
2012-12-09 00:21:08	4.85	7.33	0.261077	-4.94393	-7.47197
2012-12-09 00:31:08	5.03	7.5	0.268021	-5.12742	-7.64526
2012-12-09 00:41:08	5.2	7.68	0.274966	-5.30071	-7.82875
2012-12-09 00:51:08	5.36	7.8	0.28191	-5.46381	-7.95107
2012-12-09 01:01:08	5.54	8.02	0.288855	-5.6473	-8.17533
2012-12-09 01:11:08	5.74	8.22	0.295799	-5.85117	-8.3792	2012-12-09 01:11:08
2012-12-09 01:21:08	5.82	8.29	0.302743	-5.93272	-8.45056
2012-12-09 01:31:08	5.99	8.47	0.309688	-6.10601	-8.63405
2012-12-09 01:41:08	6.08	8.55	0.316632	-6.19776	-8.7156
2012-12-09 01:51:08	6.2	8.68	0.323577	-6.32008	-8.84811
2012-12-09 02:01:08	6.35	8.82	0.330521	-6.47299	-8.99083
2012-12-09 02:11:08	6.52	9	0.337466	-6.64628	-9.17431	2012-12-09 02:11:08
2012-12-09 02:21:08	6.7	9.18	0.34441	-6.82977	-9.3578
2012-12-09 02:31:08	6.87	9.32	0.351355	-7.00306	-9.50051
2012-12-09 02:41:08	7.03	9.48	0.358299	-7.16616	-9.66361
2012-12-09 02:51:08	7.19	9.65	0.365243	-7.32926	-9.8369
2012-12-09 03:01:08	7.35	9.83	0.372188	-7.49235	-10.0204
2012-12-09 03:11:08	7.48	9.97	0.379132	-7.62487	-10.1631	2012-12-09 03:11:08
2012-12-09 03:21:08	7.63	10.11	0.386077	-7.77778	-10.3058
2012-12-09 03:31:08	7.8	10.27	0.393021	-7.95107	-10.4689
2012-12-09 03:41:08	7.95	10.43	0.399966	-8.10398	-10.632
2012-12-09 03:51:08	8.11	10.59	0.40691	-8.26707	-10.7951
2012-12-09 04:01:08	8.27	10.7	0.413855	-8.43017	-10.9072
2012-12-09 04:11:08	8.39	10.88	0.420799	-8.5525	-11.0907	2012-12-09 04:11:08
2012-12-09 04:21:08	8.52	11.01	0.427743	-8.68502	-11.2232
2012-12-09 04:31:08	8.68	11.15	0.434688	-8.84811	-11.366
2012-12-09 04:41:08	8.83	11.31	0.441632	-9.00102	-11.5291
2012-12-09 04:51:08	8.97	11.44	0.448577	-9.14373	-11.6616
2012-12-09 05:01:08	9.12	11.59	0.455521	-9.29664	-11.8145
2012-12-09 05:11:08	9.2	11.68	0.462466	-9.37819	-11.9062	2012-12-09 05:11:08
2012-12-09 05:21:08	9.33	11.81	0.46941	-9.5107	-12.0387
2012-12-09 05:31:08	9.48	11.96	0.476355	-9.66361	-12.1916
2012-12-09 05:41:08	9.61	12.09	0.483299	-9.79613	-12.3242
2012-12-09 05:51:08	9.65	12.1	0.490243	-9.8369	-12.3344
2012-12-09 06:01:08	9.82	12.3	0.497188	-10.0102	-12.5382
2012-12-09 06:11:08	9.94	12.41	0.504132	-10.1325	-12.6504	2012-12-09 06:11:08
2012-12-09 06:21:08	10.04	12.53	0.511077	-10.2345	-12.7727
2012-12-09 06:31:08	10.19	12.66	0.518021	-10.3874	-12.9052
2012-12-09 06:41:08	10.33	12.79	0.524966	-10.5301	-13.0377
2012-12-09 06:51:08	10.47	12.94	0.53191	-10.6728	-13.1906
2012-12-09 07:01:08	10.62	13.09	0.538855	-10.8257	-13.3435
2012-12-09 07:11:08	10.72	13.2	0.545799	-10.9276	-13.4557	2012-12-09 07:11:08
2012-12-09 07:21:08	10.86	13.33	0.552743	-11.0703	-13.5882
2012-12-09 07:31:08	11.02	13.48	0.559688	-11.2334	-13.7411
2012-12-09 07:41:08	11.1	13.57	0.566632	-11.315	-13.8328
2012-12-09 07:51:08	11.25	13.72	0.573577	-11.4679	-13.9857
2012-12-09 08:01:08	11.34	13.82	0.580521	-11.5596	-14.0877
2012-12-09 08:11:08	11.46	13.97	0.587466	-11.682	-14.2406	2012-12-09 08:11:08
2012-12-09 08:21:08	11.58	14.07	0.59441	-11.8043	-14.3425
2012-12-09 08:31:08	11.68	14.15	0.601355	-11.9062	-14.4241
2012-12-09 08:41:08	11.79	14.28	0.608299	-12.0183	-14.5566
2012-12-09 08:51:08	11.94	14.41	0.615243	-12.1713	-14.6891
2012-12-09 09:01:08	11.99	14.47	0.622188	-12.2222	-14.7503
2012-12-09 09:11:08	12.12	14.59	0.629132	-12.3547	-14.8726	2012-12-09 09:11:08
2012-12-09 09:21:08	12.23	14.71	0.636077	-12.4669	-14.9949
2012-12-09 09:31:08	12.38	14.83	0.643021	-12.6198	-15.1172
2012-12-09 09:41:08	12.46	14.94	0.649966	-12.7013	-15.2294
2012-12-09 09:51:08	12.62	15.05	0.65691	-12.8644	-15.3415
2012-12-09 10:01:08	12.71	15.19	0.663855	-12.9562	-15.4842
2012-12-09 10:11:08	12.86	15.32	0.670799	-13.1091	-15.6167	2012-12-09 10:11:08
2012-12-09 10:21:08	12.97	15.45	0.677743	-13.2212	-15.7492
2012-12-09 10:31:08	13.08	15.55	0.684688	-13.3333	-15.8512
2012-12-09 10:41:08	13.21	15.67	0.691632	-13.4659	-15.9735
2012-12-09 10:51:08	13.3	15.79	0.698577	-13.5576	-16.0958
2012-12-09 11:01:08	13.4	15.87	0.705521	-13.6595	-16.1774
2012-12-09 11:11:08	13.5	15.96	0.712466	-13.7615	-16.2691	2012-12-09 11:11:08
2012-12-09 11:21:08	13.57	16.04	0.71941	-13.8328	-16.3507
2012-12-09 11:31:08	13.71	16.18	0.726355	-13.9755	-16.4934
2012-12-09 11:41:08	13.72	16.21	0.733299	-13.9857	-16.524
2012-12-09 11:51:08	13.73	16.22	0.740243	-13.9959	-16.5341
2012-12-09 12:01:08	13.11	15.59	0.747188	-13.3639	-15.8919
2012-12-09 12:11:08	13.41	15.85	0.754132	-13.6697	-16.157	2012-12-09 12:11:08
2012-12-09 12:21:08	13.59	16.09	0.761077	-13.8532	-16.4016
2012-12-09 12:31:08	13.77	16.27	0.768021	-14.0367	-16.5851
2012-12-09 12:41:08	13.88	16.37	0.774966	-14.1488	-16.6871
2012-12-09 12:51:08	13.99	16.48	0.78191	-14.261	-16.7992
2012-12-09 13:01:08	14.1	16.58	0.788855	-14.3731	-16.9011
2012-12-09 13:11:08	14.14	16.62	0.795799	-14.4139	-16.9419	2012-12-09 13:11:08
2012-12-09 13:21:08	14.11	16.58	0.802743	-14.3833	-16.9011
2012-12-09 13:31:08	14.19	16.67	0.809688	-14.4648	-16.9929
2012-12-09 13:41:08	14.31	16.82	0.816632	-14.5872	-17.1458
2012-12-09 13:51:08	14.18	16.67	0.823577	-14.4546	-16.9929
2012-12-09 14:01:08	14.36	16.85	0.830521	-14.6381	-17.1764
2012-12-09 14:11:08	14.48	16.97	0.837466	-14.7604	-17.2987	2012-12-09 14:11:08
2012-12-09 14:21:08	14.59	17.08	0.84441	-14.8726	-17.4108
2012-12-09 14:31:08	14.67	17.15	0.851355	-14.9541	-17.4822
2012-12-09 14:41:08	14.66	17.14	0.858299	-14.9439	-17.472
2012-12-09 14:51:08	14.78	17.27	0.865243	-15.0663	-17.6045
2012-12-09 15:01:08	14.82	17.32	0.872188	-15.107	-17.6555
2012-12-09 15:11:08	14.89	17.38	0.879132	-15.1784	-17.7166	2012-12-09 15:11:08
2012-12-09 15:21:08	14.99	17.46	0.886077	-15.2803	-17.7982
2012-12-09 15:31:08	14.85	17.34	0.893021	-15.1376	-17.6758
2012-12-09 15:41:08	14.98	17.47	0.899966	-15.2701	-17.8084
2012-12-09 15:51:08	15.12	17.6	0.90691	-15.4128	-17.9409
2012-12-09 16:01:08	15.24	17.71	0.913855	-15.5352	-18.053
2012-12-09 16:11:08	15.33	17.81	0.920799	-15.6269	-18.1549	2012-12-09 16:11:08
2012-12-09 16:21:08	15.42	17.91	0.927743	-15.7187	-18.2569
2012-12-09 16:31:08	15.35	17.8	0.934688	-15.6473	-18.1448
2012-12-09 16:41:08	14.35	16.78	0.941632	-14.6279	-17.105
2012-12-09 16:51:08	14.77	17.25	0.948577	-15.0561	-17.5841
2012-12-09 17:01:08	15.16	17.61	0.955521	-15.4536	-17.9511
2012-12-09 17:11:08	15.45	17.92	0.962466	-15.7492	-18.2671	2012-12-09 17:11:08
2012-12-09 17:21:08	15.37	17.85	0.96941	-15.6677	-18.1957
2012-12-09 17:31:08	14.97	17.46	0.976355	-15.2599	-17.7982
2012-12-09 17:41:08	15.32	17.8	0.983299	-15.6167	-18.1448
2012-12-09 17:51:08	15.52	18	0.990243	-15.8206	-18.3486
2012-12-09 18:01:08	15.67	18.16	0.997188	-15.9735	-18.5117
2012-12-09 18:11:08	15.76	18.25	1.00413	-16.0652	-18.6035	2012-12-09 18:11:08
2012-12-09 18:21:08	15.91	18.41	1.01108	-16.2181	-18.7666
2012-12-09 18:31:08	16.03	18.48	1.01802	-16.3405	-18.8379
2012-12-09 18:41:08	16.14	18.64	1.02497	-16.4526	-19.001
2012-12-09 18:51:08	16.24	18.72	1.03191	-16.5545	-19.0826
2012-12-09 19:01:08	16.31	18.79	1.03885	-16.6259	-19.1539
2012-12-09 19:11:08	16.44	18.88	1.0458	-16.7584	-19.2457	2012-12-09 19:11:08
2012-12-09 19:21:08	16.53	19.02	1.05274	-16.8502	-19.3884
2012-12-09 19:31:08	16.61	19.08	1.05969	-16.9317	-19.4495
2012-12-09 19:41:08	16.69	19.17	1.06663	-17.0133	-19.5413
2012-12-09 19:51:08	16.4	18.87	1.07358	-16.7176	-19.2355
2012-12-09 20:01:08	16.71	19.2	1.08052	-17.0336	-19.5719
2012-12-09 20:11:08	16.87	19.36	1.08747	-17.1967	-19.735	2012-12-09 20:11:08
2012-12-09 20:21:08	16.95	19.43	1.09441	-17.2783	-19.8063
2012-12-09 20:31:08	17.06	19.54	1.10135	-17.3904	-19.9185
2012-12-09 20:41:08	17.14	19.63	1.1083	-17.472	-20.0102
2012-12-09 20:51:08	17.2	19.69	1.11524	-17.5331	-20.0714
2012-12-09 21:01:08	17.33	19.77	1.12219	-17.6656	-20.1529
2012-12-09 21:11:08	17.4	19.88	1.12913	-17.737	-20.265	2012-12-09 21:11:08
2012-12-09 21:21:08	17.49	19.97	1.13608	-17.8287	-20.3568
2012-12-09 21:31:08	17.55	20.04	1.14302	-17.8899	-20.4281
2012-12-09 21:41:08	17.63	20.11	1.14997	-17.9715	-20.4995
2012-12-09 21:51:08	17.56	20.13	1.15691	-17.9001	-20.5199
2012-12-09 22:01:08	17.71	20.2	1.16385	-18.053	-20.5912
2012-12-09 22:11:08	17.79	20.27	1.1708	-18.1346	-20.6626	2012-12-09 22:11:08
2012-12-09 22:21:08	17.86	20.34	1.17774	-18.2059	-20.7339
2012-12-09 22:31:08	17.85	20.34	1.18469	-18.1957	-20.7339
2012-12-09 22:41:08	17.93	20.42	1.19163	-18.2773	-20.8155
2012-12-09 22:51:08	17.96	20.45	1.19858	-18.3078	-20.8461
2012-12-09 23:01:08	18.08	20.52	1.20552	-18.4302	-20.9174
2012-12-09 23:11:08	18.18	20.67	1.21247	-18.5321	-21.0703	2012-12-09 23:11:08
2012-12-09 23:21:08	18.25	20.73	1.21941	-18.6035	-21.1315
2012-12-09 23:31:08	18.27	20.76	1.22635	-18.6239	-21.1621
2012-12-09 23:41:08	18.33	20.82	1.2333	-18.685	-21.2232
2012-12-09 23:51:08	18.37	20.86	1.24024	-18.7258	-21.264
2012-12-10 00:01:08	18.42	20.89	1.24719	-18.7768	-21.2946
2012-12-10 00:11:08	18.39	20.88	1.25413	-18.7462	-21.2844	2012-12-10 00:11:08
2012-12-10 00:21:08	18.54	21	1.26108	-18.8991	-21.4067
2012-12-10 00:31:08	18.59	21.07	1.26802	-18.9501	-21.4781
2012-12-10 00:41:08	18.64	21.12	1.27497	-19.001	-21.5291
2012-12-10 00:51:08	18.73	21.21	1.28191	-19.0928	-21.6208
2012-12-10 01:01:08	18.81	21.3	1.28885	-19.1743	-21.7125
2012-12-10 01:11:08	18.87	21.36	1.2958	-19.2355	-21.7737	2012-12-10 01:11:08
2012-12-10 01:21:08	18.96	21.44	1.30274	-19.3272	-21.8552
2012-12-10 01:31:08	18.94	21.43	1.30969	-19.3068	-21.8451
2012-12-10 01:41:08	18.92	21.41	1.31663	-19.2864	-21.8247
2012-12-10 01:51:08	18.97	21.46	1.32358	-19.3374	-21.8756
2012-12-10 02:01:08	19.04	21.53	1.33052	-19.4088	-21.947
2012-12-10 02:11:08	19.14	21.63	1.33747	-19.5107	-22.0489	2012-12-10 02:11:08
2012-12-10 02:21:08	19.19	21.68	1.34441	-19.5617	-22.0999
2012-12-10 02:31:08	19.25	21.72	1.35135	-19.6228	-22.1407
2012-12-10 02:41:08	19.33	21.82	1.3583	-19.7044	-22.2426
2012-12-10 02:51:08	19.4	21.89	1.36524	-19.7757	-22.314
2012-12-10 03:01:08	19.45	21.93	1.37219	-19.8267	-22.3547
2012-12-10 03:11:08	19.49	21.97	1.37913	-19.8675	-22.3955	2012-12-10 03:11:08
2012-12-10 03:21:08	19.52	22.01	1.38608	-19.8981	-22.4363
2012-12-10 03:31:08	19.61	22.09	1.39302	-19.9898	-22.5178
2012-12-10 03:41:08	19.61	22.08	1.39997	-19.9898	-22.5076
2012-12-10 03:51:08	19.4	21.88	1.40691	-19.7757	-22.3038
2012-12-10 04:01:08	19.62	22.1	1.41385	-20	-22.528
2012-12-10 04:11:08	19.68	22.16	1.4208	-20.0612	-22.5892	2012-12-10 04:11:08
2012-12-10 04:21:08	19.64	22.12	1.42774	-20.0204	-22.5484
2012-12-10 04:31:08	19.71	22.2	1.43469	-20.0917	-22.63
2012-12-10 04:41:08	19.74	22.23	1.44163	-20.1223	-22.6606
2012-12-10 04:51:08	19.78	22.23	1.44858	-20.1631	-22.6606
2012-12-10 05:01:08	19.84	22.32	1.45552	-20.2243	-22.7523
2012-12-10 05:11:08	19.86	22.36	1.46247	-20.2446	-22.7931	2012-12-10 05:11:08
2012-12-10 05:21:08	19.9	22.38	1.46941	-20.2854	-22.8135
2012-12-10 05:31:08	19.95	22.44	1.47635	-20.3364	-22.8746
2012-12-10 05:41:08	20	22.48	1.4833	-20.3874	-22.9154
2012-12-10 05:51:08	20.01	22.49	1.49024	-20.3976	-22.9256
2012-12-10 06:01:08	20.09	22.57	1.49719	-20.4791	-23.0071
2012-12-10 06:11:08	20.13	22.59	1.50413	-20.5199	-23.0275	2012-12-10 06:11:08
2012-12-10 06:21:08	20.19	22.68	1.51108	-20.581	-23.1193
2012-12-10 06:31:08	20	22.48	1.51802	-20.3874	-22.9154
2012-12-10 06:41:08	20.2	22.69	1.52497	-20.5912	-23.1295
2012-12-10 06:51:08	20.27	22.76	1.53191	-20.6626	-23.2008
2012-12-10 07:01:08	20.29	22.78	1.53885	-20.683	-23.2212
2012-12-10 07:11:08	20.37	22.85	1.5458	-20.7645	-23.2926	2012-12-10 07:11:08
2012-12-10 07:21:08	20.42	22.9	1.55274	-20.8155	-23.3435
2012-12-10 07:31:08	20.48	22.96	1.55969	-20.8767	-23.4047
2012-12-10 07:41:08	20.52	23	1.56663	-20.9174	-23.4455
2012-12-10 07:51:08	20.58	23.04	1.57358	-20.9786	-23.4862
2012-12-10 08:01:08	20.61	23.08	1.58052	-21.0092	-23.527
2012-12-10 08:11:08	20.66	23.14	1.58747	-21.0601	-23.5882	2012-12-10 08:11:08
2012-12-10 08:21:08	20.62	23.12	1.59441	-21.0194	-23.5678
2012-12-10 08:31:08	20.68	23.15	1.60135	-21.0805	-23.5984
2012-12-10 08:41:08	20.73	23.21	1.6083	-21.1315	-23.6595
2012-12-10 08:51:08	20.75	23.23	1.61524	-21.1519	-23.6799
2012-12-10 09:01:08	20.76	23.25	1.62219	-21.1621	-23.7003
2012-12-10 09:11:08	20.81	23.3	1.62913	-21.213	-23.7513	2012-12-10 09:11:08
2012-12-10 09:21:08	20.84	23.29	1.63608	-21.2436	-23.7411
2012-12-10 09:31:08	20.56	22.99	1.64302	-20.9582	-23.4353
2012-12-10 09:41:08	20.77	23.25	1.64997	-21.1723	-23.7003
2012-12-10 09:51:08	20.84	23.34	1.65691	-21.2436	-23.792
2012-12-10 10:01:08	20.89	23.37	1.66385	-21.2946	-23.8226
2012-12-10 10:11:08	20.95	23.43	1.6708	-21.3558	-23.8838	2012-12-10 10:11:08
2012-12-10 10:21:08	20.98	23.43	1.67774	-21.3863	-23.8838
2012-12-10 10:31:08	21.05	23.48	1.68469	-21.4577	-23.9348
2012-12-10 10:41:08	21.07	23.56	1.69163	-21.4781	-24.0163
2012-12-10 10:51:08	21.08	23.56	1.69858	-21.4883	-24.0163
2012-12-10 11:01:08	21.17	23.64	1.70552	-21.58	-24.0979
2012-12-10 11:11:08	21.16	23.65	1.71247	-21.5698	-24.1081	2012-12-10 11:11:08
2012-12-10 11:21:08	21.2	23.68	1.71941	-21.6106	-24.1386
2012-12-10 11:31:08	21.25	23.74	1.72635	-21.6616	-24.1998
2012-12-10 11:41:08	21.3	23.78	1.7333	-21.7125	-24.2406
2012-12-10 11:51:08	21.16	23.62	1.74024	-21.5698	-24.0775
2012-12-10 12:01:08	21.24	23.71	1.74719	-21.6514	-24.1692
2012-12-10 12:11:08	21.28	23.76	1.75413	-21.6922	-24.2202	2012-12-10 12:11:08
2012-12-10 12:21:08	21.1	23.54	1.76108	-21.5087	-23.9959
2012-12-10 12:31:08	21.28	23.75	1.76802	-21.6922	-24.21
2012-12-10 12:41:08	21.31	23.79	1.77497	-21.7227	-24.2508
2012-12-10 12:51:08	21.33	23.8	1.78191	-21.7431	-24.261
2012-12-10 13:01:08	21.38	23.86	1.78885	-21.7941	-24.3221
2012-12-10 13:08:40	21.37	23.84	1.79409	-21.7839	-24.3017	2012-12-10 13:08:40
2012-12-10 13:09:40	21.39	23.88	1.79478	-21.8043	-24.3425
2012-12-10 13:10:40	21.43	23.87	1.79548	-21.8451	-24.3323
2012-12-10 13:11:40	21.4	23.84	1.79617	-21.8145	-24.3017
2012-12-10 13:12:40	21.4	23.87	1.79687	-21.8145	-24.3323
2012-12-10 13:13:40	21.42	23.84	1.79756	-21.8349	-24.3017
2012-12-10 13:14:40	21.37	23.84	1.79826	-21.7839	-24.3017	2012-12-10 13:14:40
2012-12-10 13:15:40	21.39	23.87	1.79895	-21.8043	-24.3323
2012-12-10 13:16:40	21.36	23.84	1.79965	-21.7737	-24.3017
2012-12-10 13:17:40	21.37	23.84	1.80034	-21.7839	-24.3017
2012-12-10 13:18:40	21.37	23.84	1.80103	-21.7839	-24.3017
2012-12-10 13:19:40	21.4	23.86	1.80173	-21.8145	-24.3221
2012-12-10 13:20:40	21.41	23.89	1.80242	-21.8247	-24.3527	2012-12-10 13:20:40
2012-12-10 13:21:40	21.38	23.82	1.80312	-21.7941	-24.2813
2012-12-10 13:22:40	21.4	23.87	1.80381	-21.8145	-24.3323
2012-12-10 13:23:40	21.41	23.88	1.80451	-21.8247	-24.3425
2012-12-10 13:24:40	21.41	23.89	1.8052	-21.8247	-24.3527
2012-12-10 13:25:40	21.46	23.92	1.8059	-21.8756	-24.3833
2012-12-10 13:26:40	21.41	23.88	1.80659	-21.8247	-24.3425	2012-12-10 13:26:40
2012-12-10 13:27:40	21.43	23.9	1.80728	-21.8451	-24.3629
2012-12-10 13:28:40	21.44	23.89	1.80798	-21.8552	-24.3527
2012-12-10 13:29:40	21.45	23.92	1.80867	-21.8654	-24.3833
2012-12-10 13:30:40	21.45	23.92	1.80937	-21.8654	-24.3833
2012-12-10 13:31:40	21.45	23.88	1.81006	-21.8654	-24.3425
2012-12-10 13:32:40	21.43	23.92	1.81076	-21.8451	-24.3833	2012-12-10 13:32:40
2012-12-10 13:33:40	21.47	23.9	1.81145	-21.8858	-24.3629
2012-12-10 13:34:40	21.48	23.95	1.81215	-21.896	-24.4139
2012-12-10 13:35:40	21.45	23.87	1.81284	-21.8654	-24.3323
2012-12-10 13:36:40	21.46	23.94	1.81353	-21.8756	-24.4037
2012-12-10 13:37:40	21.46	23.93	1.81423	-21.8756	-24.3935
2012-12-10 13:38:40	21.47	23.95	1.81492	-21.8858	-24.4139	2012-12-10 13:38:40
2012-12-10 13:39:40	21.48	23.95	1.81562	-21.896	-24.4139
2012-12-10 13:40:40	21.47	23.94	1.81631	-21.8858	-24.4037
2012-12-10 13:41:40	21.48	23.96	1.81701	-21.896	-24.4241
2012-12-10 13:42:40	21.44	23.88	1.8177	-21.8552	-24.3425
2012-12-10 13:43:40	21.44	23.95	1.8184	-21.8552	-24.4139
2012-12-10 13:44:40	21.49	23.95	1.81909	-21.9062	-24.4139	2012-12-10 13:44:40
2012-12-10 13:45:40	21.46	23.93	1.81978	-21.8756	-24.3935
2012-12-10 13:46:40	21.5	23.96	1.82048	-21.9164	-24.4241
2012-12-10 13:47:40	21.5	23.95	1.82117	-21.9164	-24.4139
2012-12-10 13:48:40	21.5	23.98	1.82187	-21.9164	-24.4444
2012-12-10 13:49:40	21.52	23.99	1.82256	-21.9368	-24.4546
2012-12-10 13:50:40	21.47	23.92	1.82326	-21.8858	-24.3833	2012-12-10 13:50:40
2012-12-10 13:51:40	21.5	23.92	1.82395	-21.9164	-24.3833
2012-12-10 13:52:40	21.5	23.98	1.82465	-21.9164	-24.4444
2012-12-10 13:53:40	21.49	23.96	1.82534	-21.9062	-24.4241
2012-12-10 13:54:40	21.51	23.94	1.82603	-21.9266	-24.4037
2012-12-10 13:55:40	21.52	23.97	1.82673	-21.9368	-24.4343
2012-12-10 13:56:40	21.53	23.96	1.82742	-21.947	-24.4241	2012-12-10 13:56:40
2012-12-10 13:57:40	21.53	24	1.82812	-21.947	-24.4648
2012-12-10 13:58:40	21.55	24.02	1.82881	-21.9674	-24.4852
2012-12-10 13:59:40	21.55	23.95	1.82951	-21.9674	-24.4139
2012-12-10 14:00:40	21.48	23.92	1.8302	-21.896	-24.3833
2012-12-10 14:01:40	21.48	23.95	1.8309	-21.896	-24.4139
2012-12-10 14:02:40	21.5	23.97	1.83159	-21.9164	-24.4343	2012-12-10 14:02:40
2012-12-10 14:03:40	21.53	23.99	1.83228	-21.947	-24.4546
2012-12-10 14:04:40	21.53	24.02	1.83298	-21.947	-24.4852
2012-12-10 14:05:40	21.54	24.02	1.83367	-21.9572	-24.4852
2012-12-10 14:06:40	21.55	24.01	1.83437	-21.9674	-24.475
2012-12-10 14:07:40	21.56	24.03	1.83506	-21.9776	-24.4954
2012-12-10 14:08:40	21.55	24.01	1.83576	-21.9674	-24.475	2012-12-10 14:08:40
2012-12-10 14:18:40	21.58	24.06	1.8427	-21.998	-24.526
2012-12-10 14:28:40	21.61	24.08	1.84965	-22.0285	-24.5464
2012-12-10 14:38:40	21.69	24.15	1.85659	-22.1101	-24.6177
2012-12-10 14:48:40	21.7	24.15	1.86353	-22.1203	-24.6177
2012-12-10 14:58:40	21.77	24.23	1.87048	-22.1916	-24.6993
2012-12-10 15:08:40	21.77	24.25	1.87742	-22.1916	-24.7197	2012-12-10 15:08:40
2012-12-10 15:18:40	21.86	24.32	1.88437	-22.2834	-24.791
2012-12-10 15:28:40	21.85	24.3	1.89131	-22.2732	-24.7706
2012-12-10 15:38:40	21.85	24.3	1.89826	-22.2732	-24.7706
2012-12-10 15:48:40	21.87	24.32	1.9052	-22.2936	-24.791
2012-12-10 15:58:40	21.89	24.35	1.91215	-22.314	-24.8216
2012-12-10 16:08:40	21.91	24.37	1.91909	-22.3344	-24.842	2012-12-10 16:08:40
2012-12-10 16:18:40	21.94	24.41	1.92603	-22.3649	-24.8828
2012-12-10 16:28:40	21.97	24.44	1.93298	-22.3955	-24.9134
2012-12-10 16:38:40	21.91	24.38	1.93992	-22.3344	-24.8522
2012-12-10 16:48:40	21.99	24.45	1.94687	-22.4159	-24.9235
2012-12-10 16:58:40	22.03	24.51	1.95381	-22.4567	-24.9847
2012-12-10 17:08:40	22.08	24.54	1.96076	-22.5076	-25.0153	2012-12-10 17:08:40
2012-12-10 17:18:40	22.15	24.6	1.9677	-22.579	-25.0765
2012-12-10 17:28:40	22.16	24.63	1.97465	-22.5892	-25.107
2012-12-10 17:38:40	22.2	24.66	1.98159	-22.63	-25.1376
2012-12-10 17:48:40	21.94	24.39	1.98853	-22.3649	-24.8624
2012-12-10 17:58:40	22.12	24.57	1.99548	-22.5484	-25.0459
2012-12-10 18:08:40	22.21	24.67	2.00242	-22.6402	-25.1478	2012-12-10 18:08:40
2012-12-10 18:18:40	22.25	24.71	2.00937	-22.6809	-25.1886
2012-12-10 18:28:40	22.31	24.76	2.01631	-22.7421	-25.2396
2012-12-10 18:38:40	22.35	24.8	2.02326	-22.7829	-25.2803
2012-12-10 18:48:40	22.4	24.87	2.0302	-22.8338	-25.3517
2012-12-10 18:58:40	22.45	24.91	2.03715	-22.8848	-25.3925
2012-12-10 19:08:40	22.51	24.95	2.04409	-22.946	-25.4332	2012-12-10 19:08:40
2012-12-10 19:18:40	22.5	24.92	2.05103	-22.9358	-25.4027
2012-12-10 19:28:40	22.56	25.01	2.05798	-22.9969	-25.4944
2012-12-10 19:38:40	22.57	25.03	2.06492	-23.0071	-25.5148
2012-12-10 19:48:40	22.62	25.09	2.07187	-23.0581	-25.5759
2012-12-10 19:58:40	22.68	25.09	2.07881	-23.1193	-25.5759
2012-12-10 20:08:40	22.65	25.1	2.08576	-23.0887	-25.5861	2012-12-10 20:08:40
2012-12-10 20:18:40	22.68	25.14	2.0927	-23.1193	-25.6269
2012-12-10 20:28:40	22.71	25.17	2.09965	-23.1498	-25.6575
2012-12-10 20:38:40	22.73	25.18	2.10659	-23.1702	-25.6677
2012-12-10 20:48:40	22.74	25.2	2.11353	-23.1804	-25.6881
2012-12-10 20:58:40	22.78	25.23	2.12048	-23.2212	-25.7187
2012-12-10 21:08:40	22.82	25.28	2.12742	-23.262	-25.7696	2012-12-10 21:08:40
2012-12-10 21:18:40	22.84	25.29	2.13437	-23.2824	-25.7798
2012-12-10 21:28:40	22.88	25.34	2.14131	-23.3231	-25.8308
2012-12-10 21:38:40	22.91	25.37	2.14826	-23.3537	-25.8614
2012-12-10 21:48:40	22.89	25.31	2.1552	-23.3333	-25.8002
2012-12-10 21:58:40	22.94	25.38	2.16215	-23.3843	-25.8716
2012-12-10 22:08:40	22.99	25.42	2.16909	-23.4353	-25.9123	2012-12-10 22:08:40
2012-12-10 22:18:40	23	25.44	2.17603	-23.4455	-25.9327
2012-12-10 22:28:40	23.05	25.5	2.18298	-23.4964	-25.9939
2012-12-10 22:38:40	23.08	25.54	2.18992	-23.527	-26.0347
2012-12-10 22:48:40	23.09	25.54	2.19687	-23.5372	-26.0347
2012-12-10 22:58:40	23.12	25.57	2.20381	-23.5678	-26.0652
2012-12-10 23:08:40	23.14	25.57	2.21076	-23.5882	-26.0652	2012-12-10 23:08:40
2012-12-10 23:18:40	22.98	25.45	2.2177	-23.4251	-25.9429
2012-12-10 23:28:40	23.15	25.62	2.22465	-23.5984	-26.1162
2012-12-10 23:38:40	23.17	25.65	2.23159	-23.6188	-26.1468
2012-12-10 23:48:40	23.26	25.72	2.23853	-23.7105	-26.2181
2012-12-10 23:58:40	23.29	25.77	2.24548	-23.7411	-26.2691
2012-12-11 00:08:40	23.33	25.81	2.25242	-23.7819	-26.3099	2012-12-11 00:08:40
2012-12-11 00:18:40	23.38	25.85	2.25937	-23.8328	-26.3507
2012-12-11 00:28:40	23.39	25.86	2.26631	-23.843	-26.3609
2012-12-11 00:38:40	23.44	25.91	2.27326	-23.894	-26.4118
2012-12-11 00:48:40	23.44	25.91	2.2802	-23.894	-26.4118
2012-12-11 00:58:40	23.48	25.95	2.28715	-23.9348	-26.4526
2012-12-11 01:08:40	23.42	25.87	2.29409	-23.8736	-26.371	2012-12-11 01:08:40
2012-12-11 01:18:40	23.51	25.97	2.30103	-23.9653	-26.473
2012-12-11 01:28:40	23.54	25.96	2.30798	-23.9959	-26.4628
2012-12-11 01:38:40	23.58	26.04	2.31492	-24.0367	-26.5443
2012-12-11 01:48:40	23.64	26.09	2.32187	-24.0979	-26.5953
2012-12-11 01:58:40	23.61	26.07	2.32881	-24.0673	-26.5749
2012-12-11 02:08:40	23.67	26.13	2.33576	-24.1284	-26.6361	2012-12-11 02:08:40
2012-12-11 02:18:40	23.69	26.15	2.3427	-24.1488	-26.6565
2012-12-11 02:28:40	23.69	26.15	2.34965	-24.1488	-26.6565
2012-12-11 02:38:40	23.69	26.16	2.35659	-24.1488	-26.6667
2012-12-11 02:48:40	23.69	26.16	2.36353	-24.1488	-26.6667
2012-12-11 02:58:40	23.73	26.21	2.37048	-24.1896	-26.7176
2012-12-11 03:08:40	23.76	26.19	2.37742	-24.2202	-26.6972	2012-12-11 03:08:40
2012-12-11 03:18:40	23.8	26.26	2.38437	-24.261	-26.7686
2012-12-11 03:28:40	23.82	26.26	2.39131	-24.2813	-26.7686
2012-12-11 03:38:40	23.86	26.32	2.39826	-24.3221	-26.8298
2012-12-11 03:48:40	23.88	26.35	2.4052	-24.3425	-26.8603
2012-12-11 03:58:40	23.9	26.37	2.41215	-24.3629	-26.8807
2012-12-11 04:08:40	23.94	26.4	2.41909	-24.4037	-26.9113	2012-12-11 04:08:40
2012-12-11 04:18:40	23.96	26.38	2.42603	-24.4241	-26.8909
2012-12-11 04:28:40	24	26.46	2.43298	-24.4648	-26.9725
2012-12-11 04:38:40	24.03	26.5	2.43992	-24.4954	-27.0133
2012-12-11 04:48:40	24.06	26.52	2.44687	-24.526	-27.0336
2012-12-11 04:58:40	24.11	26.57	2.45381	-24.577	-27.0846
2012-12-11 05:08:40	24.16	26.62	2.46076	-24.6279	-27.1356	2012-12-11 05:08:40
2012-12-11 05:18:40	24.12	26.59	2.4677	-24.5872	-27.105
2012-12-11 05:28:40	24.17	26.64	2.47465	-24.6381	-27.156
2012-12-11 05:38:40	24.21	26.66	2.48159	-24.6789	-27.1764
2012-12-11 05:48:40	24.13	26.55	2.48853	-24.5973	-27.0642
2012-12-11 05:58:40	24.18	26.65	2.49548	-24.6483	-27.1662
2012-12-11 06:08:40	24.24	26.66	2.50242	-24.7095	-27.1764	2012-12-11 06:08:40
2012-12-11 06:18:40	24.26	26.72	2.50937	-24.7299	-27.2375
2012-12-11 06:28:40	24.3	26.76	2.51631	-24.7706	-27.2783
2012-12-11 06:38:40	24.34	26.8	2.52326	-24.8114	-27.3191
2012-12-11 06:48:40	24.37	26.84	2.5302	-24.842	-27.3598
2012-12-11 06:58:40	24.41	26.83	2.53715	-24.8828	-27.3496
2012-12-11 07:08:40	24.39	26.87	2.54409	-24.8624	-27.3904	2012-12-11 07:08:40
2012-12-11 07:18:40	24.41	26.84	2.55103	-24.8828	-27.3598
2012-12-11 07:28:40	24.43	26.9	2.55798	-24.9032	-27.421
2012-12-11 07:38:40	24.45	26.92	2.56492	-24.9235	-27.4414
2012-12-11 07:48:40	24.5	26.96	2.57187	-24.9745	-27.4822
2012-12-11 07:58:40	24.54	27	2.57881	-25.0153	-27.5229
2012-12-11 08:08:40	24.57	27.01	2.58576	-25.0459	-27.5331	2012-12-11 08:08:40
2012-12-11 08:18:40	24.59	27.05	2.5927	-25.0663	-27.5739
2012-12-11 08:28:40	24.64	27.1	2.59965	-25.1172	-27.6249
2012-12-11 08:38:40	24.65	27.11	2.60659	-25.1274	-27.6351
2012-12-11 08:48:40	24.66	27.08	2.61353	-25.1376	-27.6045
2012-12-11 08:58:40	24.67	27.14	2.62048	-25.1478	-27.6656
2012-12-11 09:08:40	24.72	27.17	2.62742	-25.1988	-27.6962	2012-12-11 09:08:40
2012-12-11 09:18:40	24.76	27.22	2.63437	-25.2396	-27.7472
2012-12-11 09:28:40	24.77	27.23	2.64131	-25.2497	-27.7574
2012-12-11 09:38:40	24.78	27.27	2.64826	-25.2599	-27.7982
2012-12-11 09:48:40	24.83	27.29	2.6552	-25.3109	-27.8186
2012-12-11 09:58:40	24.87	27.34	2.66215	-25.3517	-27.8695
2012-12-11 10:08:40	24.89	27.36	2.66909	-25.3721	-27.8899	2012-12-11 10:08:40
2012-12-11 10:18:40	24.91	27.37	2.67603	-25.3925	-27.9001
2012-12-11 10:28:40	24.91	27.37	2.68298	-25.3925	-27.9001
2012-12-11 10:38:40	24.94	27.4	2.68992	-25.423	-27.9307
2012-12-11 10:48:40	24.95	27.37	2.69687	-25.4332	-27.9001
2012-12-11 10:58:40	24.97	27.44	2.70381	-25.4536	-27.9715
2012-12-11 11:08:40	25.01	27.47	2.71076	-25.4944	-28.002	2012-12-11 11:08:40
2012-12-11 11:18:40	24.99	27.46	2.7177	-25.474	-27.9918
2012-12-11 11:28:40	25.07	27.52	2.72465	-25.5556	-28.053
2012-12-11 11:38:40	25.1	27.55	2.73159	-25.5861	-28.0836
2012-12-11 11:48:40	25.11	27.57	2.73853	-25.5963	-28.104
2012-12-11 11:58:40	24.86	27.35	2.74548	-25.3415	-27.8797
2012-12-11 12:08:40	24.99	27.44	2.75242	-25.474	-27.9715	2012-12-11 12:08:40
2012-12-11 12:18:40	25.15	27.61	2.75937	-25.6371	-28.1448
2012-12-11 12:28:40	25.17	27.6	2.76631	-25.6575	-28.1346
2012-12-11 12:38:40	25.18	27.63	2.77326	-25.6677	-28.1651
2012-12-11 12:48:40	25.16	27.62	2.7802	-25.6473	-28.1549
2012-12-11 12:58:40	25.21	27.66	2.78715	-25.6983	-28.1957
2012-12-11 13:08:40	25.24	27.69	2.79409	-25.7288	-28.2263	2012-12-11 13:08:40
2012-12-11 13:18:40	25.3	27.74	2.80103	-25.79	-28.2773
2012-12-11 13:28:40	25.32	27.77	2.80798	-25.8104	-28.3078
2012-12-11 13:38:40	25.33	27.78	2.81492	-25.8206	-28.318
2012-12-11 13:48:40	25.33	27.76	2.82187	-25.8206	-28.2977
2012-12-11 13:58:40	25.35	27.8	2.82881	-25.841	-28.3384
2012-12-11 14:08:40	25.42	27.82	2.83576	-25.9123	-28.3588	2012-12-11 14:08:40
2012-12-11 14:18:40	25.43	27.84	2.8427	-25.9225	-28.3792
2012-12-11 14:28:40	25.45	27.9	2.84965	-25.9429	-28.4404
2012-12-11 14:38:40	25.49	27.93	2.85659	-25.9837	-28.4709
2012-12-11 14:48:40	25.43	27.88	2.86353	-25.9225	-28.42
2012-12-11 14:58:40	25.53	27.98	2.87048	-26.0245	-28.5219
2012-12-11 15:08:40	25.5	27.95	2.87742	-25.9939	-28.4913	2012-12-11 15:08:40
2012-12-11 15:18:40	25.53	27.98	2.88437	-26.0245	-28.5219
2012-12-11 15:28:40	25.59	28.02	2.89131	-26.0856	-28.5627
2012-12-11 15:38:40	25.61	28.06	2.89826	-26.106	-28.6035
2012-12-11 15:48:40	25.64	28.09	2.9052	-26.1366	-28.634
2012-12-11 15:58:40	25.66	28.11	2.91215	-26.157	-28.6544
2012-12-11 16:08:40	25.71	28.15	2.91909	-26.208	-28.6952	2012-12-11 16:08:40
2012-12-11 16:18:40	25.74	28.18	2.92603	-26.2385	-28.7258
2012-12-11 16:28:40	25.77	28.18	2.93298	-26.2691	-28.7258
2012-12-11 16:38:40	25.78	28.21	2.93992	-26.2793	-28.7564
2012-12-11 16:48:40	25.81	28.2	2.94687	-26.3099	-28.7462
2012-12-11 16:58:40	25.85	28.32	2.95381	-26.3507	-28.8685
2012-12-11 17:08:40	25.02	27.47	2.96076	-25.5046	-28.002	2012-12-11 17:08:40
2012-12-11 17:18:40	25.39	27.82	2.9677	-25.8818	-28.3588
2012-12-11 17:28:40	25.64	28.11	2.97465	-26.1366	-28.6544
2012-12-11 17:38:40	25.24	27.7	2.98159	-25.7288	-28.2365
2012-12-11 17:48:40	25.46	27.92	2.98853	-25.9531	-28.4608
2012-12-11 17:58:40	25.62	28.08	2.99548	-26.1162	-28.6239
2012-12-11 18:08:40	25.78	28.23	3.00242	-26.2793	-28.7768	2012-12-11 18:08:40
2012-12-11 18:18:40	25.8	28.25	3.00937	-26.2997	-28.7971
2012-12-11 18:28:40	25.82	28.27	3.01631	-26.3201	-28.8175
2012-12-11 18:38:40	25.86	28.3	3.02326	-26.3609	-28.8481
2012-12-11 18:48:40	25.91	28.31	3.0302	-26.4118	-28.8583
2012-12-11 18:58:40	25.94	28.39	3.03715	-26.4424	-28.9399
2012-12-11 19:08:40	25.97	28.42	3.04409	-26.473	-28.9704	2012-12-11 19:08:40
2012-12-11 19:18:40	26.03	28.47	3.05103	-26.5341	-29.0214
2012-12-11 19:28:40	26.06	28.52	3.05798	-26.5647	-29.0724
2012-12-11 19:38:40	26.12	28.57	3.06492	-26.6259	-29.1233
2012-12-11 19:48:40	26.14	28.58	3.07187	-26.6463	-29.1335
2012-12-11 19:58:40	26.16	28.61	3.07881	-26.6667	-29.1641
2012-12-11 20:08:40	26.2	28.65	3.08576	-26.7074	-29.2049	2012-12-11 20:08:40
2012-12-11 20:18:40	26.23	28.68	3.0927	-26.738	-29.2355
2012-12-11 20:28:40	26.28	28.73	3.09965	-26.789	-29.2864
2012-12-11 20:38:40	26.32	28.76	3.10659	-26.8298	-29.317
2012-12-11 20:48:40	26.35	28.79	3.11353	-26.8603	-29.3476
2012-12-11 20:58:40	26.37	28.77	3.12048	-26.8807	-29.3272
2012-12-11 21:08:40	26.41	28.86	3.12742	-26.9215	-29.419	2012-12-11 21:08:40
2012-12-11 21:18:40	26.44	28.88	3.13437	-26.9521	-29.4393
2012-12-11 21:28:40	26.46	28.9	3.14131	-26.9725	-29.4597
2012-12-11 21:38:40	26.49	28.94	3.14826	-27.0031	-29.5005
2012-12-11 21:48:40	26.51	28.91	3.1552	-27.0234	-29.4699
2012-12-11 21:58:40	26.56	29	3.16215	-27.0744	-29.5617
2012-12-11 22:08:40	26.59	29.03	3.16909	-27.105	-29.5923	2012-12-11 22:08:40
2012-12-11 22:18:40	26.59	28.99	3.17603	-27.105	-29.5515
2012-12-11 22:28:40	26.64	29.02	3.18298	-27.156	-29.5821
2012-12-11 22:38:40	26.67	29.12	3.18992	-27.1865	-29.684
2012-12-11 22:48:40	26.66	29.11	3.19687	-27.1764	-29.6738
2012-12-11 22:58:40	26.67	29.11	3.20381	-27.1865	-29.6738
2012-12-11 23:08:40	26.71	29.16	3.21076	-27.2273	-29.7248	2012-12-11 23:08:40
2012-12-11 23:18:40	26.74	29.19	3.2177	-27.2579	-29.7554
2012-12-11 23:28:40	26.79	29.21	3.22465	-27.3089	-29.7757
2012-12-11 23:38:40	26.77	29.22	3.23159	-27.2885	-29.7859
2012-12-11 23:48:40	26.84	29.26	3.23853	-27.3598	-29.8267
2012-12-11 23:58:40	26.86	29.3	3.24548	-27.3802	-29.8675
2012-12-12 00:08:40	26.87	29.31	3.25242	-27.3904	-29.8777	2012-12-12 00:08:40
2012-12-12 00:18:40	26.93	29.38	3.25937	-27.4516	-29.949
2012-12-12 00:28:40	26.97	29.43	3.26631	-27.4924	-30
2012-12-12 00:38:40	27	29.45	3.27326	-27.5229	-30.0204
2012-12-12 00:48:40	27.03	29.47	3.2802	-27.5535	-30.0408
2012-12-12 00:58:40	27.08	29.53	3.28715	-27.6045	-30.1019
2012-12-12 01:08:40	27.08	29.52	3.29409	-27.6045	-30.0917	2012-12-12 01:08:40
2012-12-12 01:18:40	27.13	29.57	3.30103	-27.6555	-30.1427
2012-12-12 01:28:40	27.16	29.6	3.30798	-27.686	-30.1733
2012-12-12 01:38:40	27.2	29.64	3.31492	-27.7268	-30.2141
2012-12-12 01:48:40	27.23	29.67	3.32187	-27.7574	-30.2446
2012-12-12 01:58:40	27.25	29.71	3.32881	-27.7778	-30.2854
2012-12-12 02:08:40	27.28	29.73	3.33576	-27.8084	-30.3058	2012-12-12 02:08:40
2012-12-12 02:18:40	27.32	29.77	3.3427	-27.8491	-30.3466
2012-12-12 02:28:40	27.35	29.77	3.34965	-27.8797	-30.3466
2012-12-12 02:38:40	27.36	29.82	3.35659	-27.8899	-30.3976
2012-12-12 02:48:40	27.34	29.79	3.36353	-27.8695	-30.367
2012-12-12 02:58:40	27.41	29.85	3.37048	-27.9409	-30.4281
2012-12-12 03:08:40	27.44	29.88	3.37742	-27.9715	-30.4587	2012-12-12 03:08:40
2012-12-12 03:18:40	27.47	29.88	3.38437	-28.002	-30.4587
2012-12-12 03:28:40	27.49	29.94	3.39131	-28.0224	-30.5199
2012-12-12 03:38:40	27.51	29.96	3.39826	-28.0428	-30.5403
2012-12-12 03:48:40	27.55	29.98	3.4052	-28.0836	-30.5607
2012-12-12 03:58:40	27.55	30	3.41215	-28.0836	-30.581
2012-12-12 04:08:40	27.56	30	3.41909	-28.0938	-30.581	2012-12-12 04:08:40
2012-12-12 04:18:40	27.61	30.05	3.42603	-28.1448	-30.632
2012-12-12 04:28:40	27.64	30.09	3.43298	-28.1753	-30.6728
2012-12-12 04:38:40	27.65	30.1	3.43992	-28.1855	-30.683
2012-12-12 04:48:40	27.65	30.1	3.44687	-28.1855	-30.683
2012-12-12 04:58:40	27.57	30.02	3.45381	-28.104	-30.6014
2012-12-12 05:08:40	27.67	30.12	3.46076	-28.2059	-30.7034	2012-12-12 05:08:40
2012-12-12 05:18:40	27.71	30.15	3.4677	-28.2467	-30.7339
2012-12-12 05:28:40	27.75	30.2	3.47465	-28.2875	-30.7849
2012-12-12 05:38:40	27.8	30.24	3.48159	-28.3384	-30.8257
2012-12-12 05:48:40	27.81	30.26	3.48853	-28.3486	-30.8461
2012-12-12 05:58:40	27.84	30.28	3.49548	-28.3792	-30.8665
2012-12-12 06:08:40	27.89	30.33	3.50242	-28.4302	-30.9174	2012-12-12 06:08:40
2012-12-12 06:18:40	27.92	30.32	3.50937	-28.4608	-30.9072
2012-12-12 06:28:40	27.95	30.41	3.51631	-28.4913	-30.999
2012-12-12 06:38:40	27.99	30.44	3.52326	-28.5321	-31.0296
2012-12-12 06:48:40	28.03	30.43	3.5302	-28.5729	-31.0194
2012-12-12 06:58:40	28.04	30.5	3.53715	-28.5831	-31.0907
2012-12-12 07:08:40	28.08	30.53	3.54409	-28.6239	-31.1213	2012-12-12 07:08:40
2012-12-12 07:18:40	28.1	30.55	3.55103	-28.6442	-31.1417
2012-12-12 07:28:40	28.09	30.54	3.55798	-28.634	-31.1315
2012-12-12 07:38:40	28.16	30.61	3.56492	-28.7054	-31.2029
2012-12-12 07:48:40	28.18	30.6	3.57187	-28.7258	-31.1927
2012-12-12 07:58:40	28.2	30.64	3.57881	-28.7462	-31.2334
2012-12-12 08:08:40	28.22	30.67	3.58576	-28.7666	-31.264	2012-12-12 08:08:40
2012-12-12 08:18:40	28.26	30.71	3.5927	-28.8073	-31.3048
2012-12-12 08:28:40	28.28	30.73	3.59965	-28.8277	-31.3252
2012-12-12 08:38:40	28.32	30.76	3.60659	-28.8685	-31.3558
2012-12-12 08:48:40	28.37	30.77	3.61353	-28.9195	-31.366
2012-12-12 08:58:40	28.39	30.84	3.62048	-28.9399	-31.4373
2012-12-12 09:08:40	28.38	30.83	3.62742	-28.9297	-31.4271	2012-12-12 09:08:40
2012-12-12 09:18:40	28.43	30.88	3.63437	-28.9806	-31.4781
2012-12-12 09:28:40	28.34	30.76	3.64131	-28.8889	-31.3558
2012-12-12 09:38:40	28.46	30.89	3.64826	-29.0112	-31.4883
2012-12-12 09:48:40	28.51	30.91	3.6552	-29.0622	-31.5087
2012-12-12 09:58:40	28.56	30.93	3.66215	-29.1131	-31.5291
2012-12-12 10:08:40	28.55	30.97	3.66909	-29.103	-31.5698	2012-12-12 10:08:40
2012-12-12 10:18:40	28.56	30.99	3.67603	-29.1131	-31.5902
2012-12-12 10:28:40	28.59	31.01	3.68298	-29.1437	-31.6106
2012-12-12 10:38:40	28.61	31.03	3.68992	-29.1641	-31.631
2012-12-12 10:48:40	28.68	31.07	3.69687	-29.2355	-31.6718
2012-12-12 10:58:40	28.69	31.12	3.70381	-29.2457	-31.7227
2012-12-12 11:08:40	28.71	31.13	3.71076	-29.2661	-31.7329	2012-12-12 11:08:40
2012-12-12 11:18:40	28.75	31.17	3.7177	-29.3068	-31.7737
2012-12-12 11:28:40	28.76	31.15	3.72465	-29.317	-31.7533
2012-12-12 11:38:40	28.76	31.2	3.73159	-29.317	-31.8043
2012-12-12 11:48:40	28.81	31.24	3.73853	-29.368	-31.8451
2012-12-12 11:58:40	28.84	31.27	3.74548	-29.3986	-31.8756
2012-12-12 12:08:40	28.89	31.32	3.75242	-29.4495	-31.9266	2012-12-12 12:08:40
2012-12-12 12:18:40	28.93	31.35	3.75937	-29.4903	-31.9572
2012-12-12 12:28:40	28.97	31.35	3.76631	-29.5311	-31.9572
2012-12-12 12:38:40	28.96	31.39	3.77326	-29.5209	-31.998
2012-12-12 12:48:40	28.98	31.4	3.7802	-29.5413	-32.0082
2012-12-12 12:58:40	29.03	31.44	3.78715	-29.5923	-32.0489
2012-12-12 13:08:40	29.05	31.48	3.79409	-29.6126	-32.0897	2012-12-12 13:08:40
2012-12-12 13:18:40	29.07	31.49	3.80103	-29.633	-32.0999
2012-12-12 13:28:40	29.1	31.52	3.80798	-29.6636	-32.1305
2012-12-12 13:38:40	29.15	31.56	3.81492	-29.7146	-32.1713
2012-12-12 13:48:40	29.17	31.56	3.82187	-29.735	-32.1713
2012-12-12 13:58:40	29.13	31.54	3.82881	-29.6942	-32.1509
2012-12-12 14:08:40	29.2	31.58	3.83576	-29.7655	-32.1916	2012-12-12 14:08:40
2012-12-12 14:18:40	29.23	31.64	3.8427	-29.7961	-32.2528
2012-12-12 14:28:40	29.26	31.69	3.84965	-29.8267	-32.3038
2012-12-12 14:38:40	29.26	31.71	3.85659	-29.8267	-32.3242
2012-12-12 14:48:40	29.34	31.71	3.86353	-29.9083	-32.3242
2012-12-12 14:58:40	29.34	31.76	3.87048	-29.9083	-32.3751
2012-12-12 15:08:40	29.37	31.79	3.87742	-29.9388	-32.4057	2012-12-12 15:08:40
2012-12-12 15:18:40	29.41	31.78	3.88437	-29.9796	-32.3955
2012-12-12 15:28:40	29.43	31.85	3.89131	-30	-32.4669
2012-12-12 15:38:40	29.44	31.86	3.89826	-30.0102	-32.4771
2012-12-12 15:48:40	29.5	31.87	3.9052	-30.0714	-32.4873
2012-12-12 15:58:40	29.51	31.94	3.91215	-30.0815	-32.5586
2012-12-12 16:08:40	29.53	31.93	3.91909	-30.1019	-32.5484	2012-12-12 16:08:40
2012-12-12 16:18:40	29.57	31.99	3.92603	-30.1427	-32.6096
2012-12-12 16:28:40	29.61	32.02	3.93298	-30.1835	-32.6402
2012-12-12 16:38:40	29.65	32.07	3.93992	-30.2243	-32.6911
2012-12-12 16:48:40	29.64	32.07	3.94687	-30.2141	-32.6911
2012-12-12 16:58:40	29.68	32.11	3.95381	-30.2548	-32.7319
2012-12-12 17:08:40	29.71	32.08	3.96076	-30.2854	-32.7013	2012-12-12 17:08:40
2012-12-12 17:18:40	29.76	32.17	3.9677	-30.3364	-32.7931
2012-12-12 17:28:40	29.71	32.12	3.97465	-30.2854	-32.7421
2012-12-12 17:38:40	29.66	32.11	3.98159	-30.2345	-32.7319
2012-12-12 17:48:40	29.7	32.14	3.98853	-30.2752	-32.7625
2012-12-12 17:58:40	29.69	32.13	3.99548	-30.265	-32.7523
2012-12-12 18:08:40	29.72	32.16	4.00242	-30.2956	-32.7829	2012-12-12 18:08:40
2012-12-12 18:18:40	29.76	32.2	4.00937	-30.3364	-32.8236
2012-12-12 18:28:40	29.8	32.25	4.01631	-30.3772	-32.8746
2012-12-12 18:38:40	29.84	32.28	4.02326	-30.4179	-32.9052
2012-12-12 18:48:40	29.89	32.29	4.0302	-30.4689	-32.9154
2012-12-12 18:58:40	29.93	32.37	4.03715	-30.5097	-32.9969
2012-12-12 19:08:40	29.96	32.4	4.04409	-30.5403	-33.0275	2012-12-12 19:08:40
2012-12-12 19:18:40	29.99	32.39	4.05103	-30.5708	-33.0173
2012-12-12 19:28:40	30	32.45	4.05798	-30.581	-33.0785
2012-12-12 19:38:40	30.04	32.48	4.06492	-30.6218	-33.1091
2012-12-12 19:48:40	30.09	32.49	4.07187	-30.6728	-33.1193
2012-12-12 19:58:40	30.12	32.54	4.07881	-30.7034	-33.1702
2012-12-12 20:08:40	30.15	32.54	4.08576	-30.7339	-33.1702	2012-12-12 20:08:40
2012-12-12 20:18:40	30.17	32.56	4.0927	-30.7543	-33.1906
2012-12-12 20:28:40	30.2	32.64	4.09965	-30.7849	-33.2722
2012-12-12 20:38:40	30.22	32.66	4.10659	-30.8053	-33.2926
2012-12-12 20:48:40	30.26	32.7	4.11353	-30.8461	-33.3333
2012-12-12 20:58:40	30.27	32.71	4.12048	-30.8563	-33.3435
2012-12-12 21:08:40	30.32	32.74	4.12742	-30.9072	-33.3741	2012-12-12 21:08:40
2012-12-12 21:18:40	30.31	32.77	4.13437	-30.897	-33.4047
2012-12-12 21:28:40	30.36	32.8	4.14131	-30.948	-33.4353
2012-12-12 21:38:40	30.42	32.8	4.14826	-31.0092	-33.4353
2012-12-12 21:48:40	30.43	32.88	4.1552	-31.0194	-33.5168
2012-12-12 21:58:40	30.45	32.89	4.16215	-31.0398	-33.527
2012-12-12 22:08:40	30.48	32.93	4.16909	-31.0703	-33.5678	2012-12-12 22:08:40
2012-12-12 22:18:40	30.52	32.96	4.17603	-31.1111	-33.5984
2012-12-12 22:28:40	30.55	32.99	4.18298	-31.1417	-33.629
2012-12-12 22:38:40	30.47	32.87	4.18992	-31.0601	-33.5066
2012-12-12 22:48:40	30.55	32.97	4.19687	-31.1417	-33.6086
2012-12-12 22:58:40	30.59	33.04	4.20381	-31.1825	-33.6799
2012-12-12 23:08:40	30.64	33.08	4.21076	-31.2334	-33.7207	2012-12-12 23:08:40
2012-12-12 23:18:40	30.67	33.12	4.2177	-31.264	-33.7615
2012-12-12 23:28:40	30.69	33.09	4.22465	-31.2844	-33.7309
2012-12-12 23:38:40	30.73	33.17	4.23159	-31.3252	-33.8124
2012-12-12 23:48:40	30.73	33.17	4.23853	-31.3252	-33.8124
2012-12-12 23:58:40	30.77	33.21	4.24548	-31.366	-33.8532
2012-12-13 00:08:40	30.82	33.26	4.25242	-31.4169	-33.9042	2012-12-13 00:08:40
2012-12-13 00:18:40	30.83	33.27	4.25937	-31.4271	-33.9144
2012-12-13 00:28:40	30.87	33.31	4.26631	-31.4679	-33.9551
2012-12-13 00:38:40	30.92	33.35	4.27326	-31.5189	-33.9959
2012-12-13 00:48:40	30.94	33.35	4.2802	-31.5392	-33.9959
2012-12-13 00:58:40	30.98	33.43	4.28715	-31.58	-34.0775
2012-12-13 01:08:40	31.01	33.46	4.29409	-31.6106	-34.1081	2012-12-13 01:08:40
2012-12-13 01:18:40	31.03	33.47	4.30103	-31.631	-34.1182
2012-12-13 01:28:40	31.07	33.46	4.30798	-31.6718	-34.1081
2012-12-13 01:38:40	31.09	33.53	4.31492	-31.6922	-34.1794
2012-12-13 01:48:40	31.09	33.52	4.32187	-31.6922	-34.1692
2012-12-13 01:58:40	31.14	33.57	4.32881	-31.7431	-34.2202
2012-12-13 02:08:40	31.17	33.61	4.33576	-31.7737	-34.261	2012-12-13 02:08:40
2012-12-13 02:18:40	31.18	33.63	4.3427	-31.7839	-34.2813
2012-12-13 02:28:40	31.22	33.66	4.34965	-31.8247	-34.3119
2012-12-13 02:38:40	31.25	33.69	4.35659	-31.8552	-34.3425
2012-12-13 02:48:40	31.29	33.72	4.36353	-31.896	-34.3731
2012-12-13 02:58:40	31.32	33.76	4.37048	-31.9266	-34.4139
2012-12-13 03:08:40	31.34	33.77	4.37742	-31.947	-34.4241	2012-12-13 03:08:40
2012-12-13 03:18:40	31.34	33.78	4.38437	-31.947	-34.4343
2012-12-13 03:28:40	31.4	33.84	4.39131	-32.0082	-34.4954
2012-12-13 03:38:40	31.43	33.86	4.39826	-32.0387	-34.5158
2012-12-13 03:48:40	31.46	33.9	4.4052	-32.0693	-34.5566
2012-12-13 03:58:40	31.47	33.91	4.41215	-32.0795	-34.5668
2012-12-13 04:08:40	31.51	33.91	4.41909	-32.1203	-34.5668	2012-12-13 04:08:40
2012-12-13 04:18:40	31.54	33.97	4.42603	-32.1509	-34.6279
2012-12-13 04:28:40	31.59	34.03	4.43298	-32.2018	-34.6891
2012-12-13 04:38:40	31.6	34.03	4.43992	-32.212	-34.6891
2012-12-13 04:48:40	31.62	34.06	4.44687	-32.2324	-34.7197
2012-12-13 04:58:40	31.65	34.09	4.45381	-32.263	-34.7503
2012-12-13 05:08:40	31.68	34.12	4.46076	-32.2936	-34.7808	2012-12-13 05:08:40
2012-12-13 05:18:40	31.72	34.17	4.4677	-32.3344	-34.8318
2012-12-13 05:28:40	31.78	34.21	4.47465	-32.3955	-34.8726
2012-12-13 05:38:40	31.81	34.26	4.48159	-32.4261	-34.9235
2012-12-13 05:48:40	31.83	34.27	4.48853	-32.4465	-34.9337
2012-12-13 05:58:40	31.87	34.31	4.49548	-32.4873	-34.9745
2012-12-13 06:08:40	31.91	34.36	4.50242	-32.528	-35.0255	2012-12-13 06:08:40
2012-12-13 06:18:40	31.89	34.32	4.50937	-32.5076	-34.9847
2012-12-13 06:28:40	31.98	34.42	4.51631	-32.5994	-35.0866
2012-12-13 06:38:40	32.01	34.44	4.52326	-32.63	-35.107
2012-12-13 06:48:40	32.06	34.49	4.5302	-32.6809	-35.158
2012-12-13 06:58:40	32.03	34.48	4.53715	-32.6504	-35.1478
2012-12-13 07:08:40	32.1	34.54	4.54409	-32.7217	-35.209	2012-12-13 07:08:40
2012-12-13 07:18:40	32.1	34.54	4.55103	-32.7217	-35.209
2012-12-13 07:28:40	32.15	34.59	4.55798	-32.7727	-35.2599
2012-12-13 07:38:40	32.19	34.63	4.56492	-32.8135	-35.3007
2012-12-13 07:48:40	32.23	34.67	4.57187	-32.8542	-35.3415
2012-12-13 07:58:40	32.27	34.67	4.57881	-32.895	-35.3415
2012-12-13 08:08:40	32.31	34.71	4.58576	-32.9358	-35.3823	2012-12-13 08:08:40
2012-12-13 08:18:40	32.32	34.77	4.5927	-32.946	-35.4434
2012-12-13 08:28:40	32.37	34.81	4.59965	-32.9969	-35.4842
2012-12-13 08:38:40	32.38	34.82	4.60659	-33.0071	-35.4944
2012-12-13 08:48:40	32.44	34.84	4.61353	-33.0683	-35.5148
2012-12-13 08:58:40	32.46	34.9	4.62048	-33.0887	-35.5759
2012-12-13 09:08:40	32.5	34.95	4.62742	-33.1295	-35.6269	2012-12-13 09:08:40
2012-12-13 09:18:40	32.54	34.99	4.63437	-33.1702	-35.6677
2012-12-13 09:28:40	32.57	35.01	4.64131	-33.2008	-35.6881
2012-12-13 09:38:40	32.59	35.04	4.64826	-33.2212	-35.7187
2012-12-13 09:48:40	32.62	35.07	4.6552	-33.2518	-35.7492
2012-12-13 09:58:40	32.35	34.79	4.66215	-32.9766	-35.4638
2012-12-13 10:08:40	32.59	35.04	4.66909	-33.2212	-35.7187	2012-12-13 10:08:40
2012-12-13 10:18:40	32.68	35.13	4.67603	-33.3129	-35.8104
2012-12-13 10:28:40	32.73	35.17	4.68298	-33.3639	-35.8512
2012-12-13 10:38:40	32.76	35.21	4.68992	-33.3945	-35.8919
2012-12-13 10:48:40	32.79	35.24	4.69687	-33.4251	-35.9225
2012-12-13 10:58:40	32.83	35.27	4.70381	-33.4659	-35.9531
2012-12-13 11:08:40	32.86	35.31	4.71076	-33.4964	-35.9939	2012-12-13 11:08:40
2012-12-13 11:18:40	32.92	35.36	4.7177	-33.5576	-36.0449
2012-12-13 11:28:40	32.94	35.37	4.72465	-33.578	-36.055
2012-12-13 11:38:40	32.97	35.42	4.73159	-33.6086	-36.106
2012-12-13 11:48:40	33	35.43	4.73853	-33.6391	-36.1162
2012-12-13 11:58:40	33.01	35.48	4.74548	-33.6493	-36.1672
2012-12-13 12:08:40	33.06	35.52	4.75242	-33.7003	-36.208	2012-12-13 12:08:40
2012-12-13 12:18:40	33.11	35.55	4.75937	-33.7513	-36.2385
2012-12-13 12:28:40	33.14	35.56	4.76631	-33.7819	-36.2487
2012-12-13 12:38:40	33.16	35.6	4.77326	-33.8022	-36.2895
2012-12-13 12:48:40	33.2	35.66	4.7802	-33.843	-36.3507
2012-12-13 12:58:40	32.88	35.34	4.78715	-33.5168	-36.0245
2012-12-13 13:08:40	33.13	35.6	4.79409	-33.7717	-36.2895	2012-12-13 13:08:40
2012-12-13 13:18:40	33.2	35.64	4.80103	-33.843	-36.3303
2012-12-13 13:28:40	33.25	35.72	4.80798	-33.894	-36.4118
2012-12-13 13:38:40	33.3	35.77	4.81492	-33.945	-36.4628
2012-12-13 13:48:40	33.35	35.81	4.82187	-33.9959	-36.5036
2012-12-13 13:58:40	33.36	35.83	4.82881	-34.0061	-36.524
2012-12-13 14:08:40	33.44	35.85	4.83576	-34.0877	-36.5443	2012-12-13 14:08:40
2012-12-13 14:18:40	33.4	35.85	4.8427	-34.0469	-36.5443
2012-12-13 14:28:40	33.47	35.94	4.84965	-34.1182	-36.6361
2012-12-13 14:38:40	33.51	35.96	4.85659	-34.159	-36.6565
2012-12-13 14:48:40	33.55	35.97	4.86353	-34.1998	-36.6667
2012-12-13 14:58:40	33.6	36.04	4.87048	-34.2508	-36.738
2012-12-13 15:08:40	33.64	36.09	4.87742	-34.2915	-36.789	2012-12-13 15:08:40
2012-12-13 15:18:40	33.65	36.1	4.88437	-34.3017	-36.7992
2012-12-13 15:28:40	33.67	36.15	4.89131	-34.3221	-36.8502
2012-12-13 15:38:40	33.75	36.21	4.89826	-34.4037	-36.9113
2012-12-13 15:48:40	33.8	36.25	4.9052	-34.4546	-36.9521
2012-12-13 15:58:40	33.83	36.27	4.91215	-34.4852	-36.9725
2012-12-13 16:08:40	33.87	36.33	4.91909	-34.526	-37.0336	2012-12-13 16:08:40
2012-12-13 16:18:40	33.94	36.39	4.92603	-34.5973	-37.0948
2012-12-13 16:28:40	33.99	36.44	4.93298	-34.6483	-37.1458
2012-12-13 16:38:40	34.03	36.48	4.93992	-34.6891	-37.1865
2012-12-13 16:48:40	34.1	36.55	4.94687	-34.7604	-37.2579
2012-12-13 16:58:40	34.13	36.58	4.95381	-34.791	-37.2885
2012-12-13 17:08:40	34.16	36.61	4.96076	-34.8216	-37.3191	2012-12-13 17:08:40
2012-12-13 17:18:40	34.19	36.64	4.9677	-34.8522	-37.3496
2012-12-13 17:28:40	34.25	36.69	4.97465	-34.9134	-37.4006
2012-12-13 17:38:40	34.29	36.74	4.98159	-34.9541	-37.4516
2012-12-13 17:48:40	34.36	36.76	4.98853	-35.0255	-37.472
2012-12-13 17:58:40	34.39	36.83	4.99548	-35.0561	-37.5433
2012-12-13 18:08:40	34.44	36.87	5.00242	-35.107	-37.5841	2012-12-13 18:08:40
2012-12-13 18:18:40	34.49	36.93	5.00937	-35.158	-37.6453
2012-12-13 18:28:40	34.48	36.88	5.01631	-35.1478	-37.5943
2012-12-13 18:38:40	34.55	37.01	5.02326	-35.2192	-37.7268
2012-12-13 18:48:40	34.6	37.04	5.0302	-35.2701	-37.7574
2012-12-13 18:58:40	34.65	37.08	5.03715	-35.3211	-37.7982
2012-12-13 19:08:40	34.67	37.11	5.04409	-35.3415	-37.8287	2012-12-13 19:08:40
2012-12-13 19:18:40	34.78	37.19	5.05103	-35.4536	-37.9103
2012-12-13 19:28:40	34.76	37.21	5.05798	-35.4332	-37.9307
2012-12-13 19:38:40	34.82	37.28	5.06492	-35.4944	-38.002
2012-12-13 19:48:40	34.88	37.32	5.07187	-35.5556	-38.0428
2012-12-13 19:58:40	34.9	37.37	5.07881	-35.5759	-38.0938
2012-12-13 20:08:40	34.98	37.37	5.08576	-35.6575	-38.0938	2012-12-13 20:08:40
2012-12-13 20:18:40	35	37.44	5.0927	-35.6779	-38.1651
2012-12-13 20:28:40	35.05	37.5	5.09965	-35.7288	-38.2263
2012-12-13 20:38:40	35.09	37.53	5.10659	-35.7696	-38.2569
2012-12-13 20:48:40	35.16	37.61	5.11353	-35.841	-38.3384
2012-12-13 20:58:40	35.22	37.63	5.12048	-35.9021	-38.3588
2012-12-13 21:08:40	35.25	37.7	5.12742	-35.9327	-38.4302	2012-12-13 21:08:40
2012-12-13 21:18:40	35.32	37.72	5.13437	-36.0041	-38.4506
2012-12-13 21:28:40	35.33	37.79	5.14131	-36.0143	-38.5219
2012-12-13 21:38:40	35.4	37.84	5.14826	-36.0856	-38.5729
2012-12-13 21:48:40	35.44	37.88	5.1552	-36.1264	-38.6137
2012-12-13 21:58:40	35.5	37.94	5.16215	-36.1876	-38.6748
2012-12-13 22:08:40	35.45	37.89	5.16909	-36.1366	-38.6239	2012-12-13 22:08:40
2012-12-13 22:18:40	35.53	37.98	5.17603	-36.2181	-38.7156
2012-12-13 22:28:40	35.58	38.02	5.18298	-36.2691	-38.7564
2012-12-13 22:38:40	35.63	38.05	5.18992	-36.3201	-38.787
2012-12-13 22:48:40	35.66	38.11	5.19687	-36.3507	-38.8481
2012-12-13 22:58:40	35.72	38.15	5.20381	-36.4118	-38.8889
2012-12-13 23:08:40	35.77	38.21	5.21076	-36.4628	-38.9501	2012-12-13 23:08:40
2012-12-13 23:18:40	35.81	38.25	5.2177	-36.5036	-38.9908
2012-12-13 23:28:40	35.86	38.28	5.22465	-36.5545	-39.0214
2012-12-13 23:38:40	35.89	38.34	5.23159	-36.5851	-39.0826
2012-12-13 23:48:40	35.95	38.39	5.23853	-36.6463	-39.1335
2012-12-13 23:58:40	36	38.43	5.24548	-36.6972	-39.1743
2012-12-14 00:08:40	36.06	38.51	5.25242	-36.7584	-39.2559	2012-12-14 00:08:40
2012-12-14 00:18:40	36.1	38.51	5.25937	-36.7992	-39.2559
2012-12-14 00:28:40	36.13	38.58	5.26631	-36.8298	-39.3272
2012-12-14 00:38:40	36.16	38.61	5.27326	-36.8603	-39.3578
2012-12-14 00:48:40	36.22	38.66	5.2802	-36.9215	-39.4088
2012-12-14 00:58:40	36.26	38.7	5.28715	-36.9623	-39.4495
2012-12-14 01:08:40	36.33	38.72	5.29409	-37.0336	-39.4699	2012-12-14 01:08:40
2012-12-14 01:18:40	36.34	38.78	5.30103	-37.0438	-39.5311
2012-12-14 01:28:40	36.41	38.85	5.30798	-37.1152	-39.6024
2012-12-14 01:38:40	36.46	38.89	5.31492	-37.1662	-39.6432
2012-12-14 01:48:40	36.5	38.9	5.32187	-37.2069	-39.6534
2012-12-14 01:58:40	36.53	38.97	5.32881	-37.2375	-39.7248
2012-12-14 02:08:40	36.57	39.01	5.33576	-37.2783	-39.7655	2012-12-14 02:08:40
2012-12-14 02:18:40	36.61	39.05	5.3427	-37.3191	-39.8063
2012-12-14 02:28:40	36.62	39.07	5.34965	-37.3293	-39.8267
2012-12-14 02:38:40	36.68	39.13	5.35659	-37.3904	-39.8879
2012-12-14 02:48:40	36.72	39.17	5.36353	-37.4312	-39.9286
2012-12-14 02:58:40	36.79	39.21	5.37048	-37.5025	-39.9694
2012-12-14 03:08:40	36.84	39.28	5.37742	-37.5535	-40.0408	2012-12-14 03:08:40
2012-12-14 03:18:40	36.89	39.31	5.38437	-37.6045	-40.0714
2012-12-14 03:28:40	36.95	39.35	5.39131	-37.6656	-40.1121
2012-12-14 03:38:40	36.99	39.44	5.39826	-37.7064	-40.2039
2012-12-14 03:48:40	37.02	39.47	5.4052	-37.737	-40.2345
2012-12-14 03:58:40	37.08	39.52	5.41215	-37.7982	-40.2854
2012-12-14 04:08:40	37.11	39.57	5.41909	-37.8287	-40.3364	2012-12-14 04:08:40
2012-12-14 04:18:40	37.17	39.62	5.42603	-37.8899	-40.3874
2012-12-14 04:28:40	37.2	39.65	5.43298	-37.9205	-40.4179
2012-12-14 04:38:40	37.26	39.7	5.43992	-37.9817	-40.4689
2012-12-14 04:48:40	37.32	39.76	5.44687	-38.0428	-40.5301
2012-12-14 04:58:40	37.36	39.81	5.45381	-38.0836	-40.581
2012-12-14 05:08:40	37.41	39.86	5.46076	-38.1346	-40.632	2012-12-14 05:08:40
2012-12-14 05:18:40	37.45	39.89	5.4677	-38.1753	-40.6626
2012-12-14 05:28:40	37.49	39.94	5.47465	-38.2161	-40.7136
2012-12-14 05:38:40	37.55	40.01	5.48159	-38.2773	-40.7849
2012-12-14 05:48:40	37.59	40.04	5.48853	-38.318	-40.8155
2012-12-14 05:58:40	37.63	40.08	5.49548	-38.3588	-40.8563
2012-12-14 06:08:40	37.68	40.08	5.50242	-38.4098	-40.8563	2012-12-14 06:08:40
2012-12-14 06:18:40	37.72	40.15	5.50937	-38.4506	-40.9276
2012-12-14 06:28:40	37.77	40.21	5.51631	-38.5015	-40.9888
2012-12-14 06:38:40	37.83	40.22	5.52326	-38.5627	-40.999
2012-12-14 06:48:40	37.85	40.3	5.5302	-38.5831	-41.0805
2012-12-14 06:58:40	37.9	40.3	5.53715	-38.634	-41.0805
2012-12-14 07:08:40	37.93	40.37	5.54409	-38.6646	-41.1519	2012-12-14 07:08:40
2012-12-14 07:18:40	37.98	40.42	5.55103	-38.7156	-41.2029
2012-12-14 07:28:40	38.04	40.48	5.55798	-38.7768	-41.264
2012-12-14 07:38:40	38.08	40.53	5.56492	-38.8175	-41.315
2012-12-14 07:48:40	38.12	40.57	5.57187	-38.8583	-41.3558
2012-12-14 07:58:40	38.13	40.58	5.57881	-38.8685	-41.366
2012-12-14 08:08:40	38.14	40.6	5.58576	-38.8787	-41.3863	2012-12-14 08:08:40
2012-12-14 08:18:40	38.17	40.62	5.5927	-38.9093	-41.4067
2012-12-14 08:28:40	38.21	40.63	5.59965	-38.9501	-41.4169
2012-12-14 08:38:40	38.26	40.71	5.60659	-39.001	-41.4985
2012-12-14 08:48:40	38.27	40.73	5.61353	-39.0112	-41.5189
2012-12-14 08:58:40	38.33	40.78	5.62048	-39.0724	-41.5698
2012-12-14 09:08:40	38.36	40.8	5.62742	-39.103	-41.5902	2012-12-14 09:08:40
2012-12-14 09:18:40	38.41	40.84	5.63437	-39.1539	-41.631
2012-12-14 09:28:40	38.08	40.52	5.64131	-38.8175	-41.3048
2012-12-14 09:38:40	38.31	40.77	5.64826	-39.052	-41.5596
2012-12-14 09:48:40	38.44	40.85	5.6552	-39.1845	-41.6412
2012-12-14 09:58:40	38.48	40.93	5.66215	-39.2253	-41.7227
2012-12-14 10:08:40	38.55	40.98	5.66909	-39.2966	-41.7737	2012-12-14 10:08:40
2012-12-14 10:18:40	38.59	41.05	5.67603	-39.3374	-41.8451
2012-12-14 10:28:40	38.67	41.11	5.68298	-39.419	-41.9062
2012-12-14 10:38:40	38.71	41.12	5.68992	-39.4597	-41.9164
2012-12-14 10:48:40	38.75	41.16	5.69687	-39.5005	-41.9572
2012-12-14 10:58:40	38.81	41.26	5.70381	-39.5617	-42.0591
2012-12-14 11:08:40	38.83	41.28	5.71076	-39.5821	-42.0795	2012-12-14 11:08:40
2012-12-14 11:18:40	38.87	41.32	5.7177	-39.6228	-42.1203
2012-12-14 11:28:40	38.92	41.37	5.72465	-39.6738	-42.1713
2012-12-14 11:38:40	38.98	41.42	5.73159	-39.735	-42.2222
2012-12-14 11:48:40	39.02	41.47	5.73853	-39.7757	-42.2732
2012-12-14 11:58:40	39.07	41.48	5.74548	-39.8267	-42.2834
2012-12-14 12:08:40	39.12	41.55	5.75242	-39.8777	-42.3547	2012-12-14 12:08:40
2012-12-14 12:18:40	39.15	41.6	5.75937	-39.9083	-42.4057
2012-12-14 12:28:40	39.2	41.65	5.76631	-39.9592	-42.4567
2012-12-14 12:38:40	39.26	41.67	5.77326	-40.0204	-42.4771
2012-12-14 12:48:40	39.28	41.73	5.7802	-40.0408	-42.5382
2012-12-14 12:58:40	39.3	41.76	5.78715	-40.0612	-42.5688
2012-12-14 13:08:40	39.36	41.81	5.79409	-40.1223	-42.6198	2012-12-14 13:08:40
2012-12-14 13:18:40	39.45	41.87	5.80103	-40.2141	-42.6809
2012-12-14 13:28:40	39.48	41.92	5.80798	-40.2446	-42.7319
2012-12-14 13:38:40	39.54	41.98	5.81492	-40.3058	-42.7931
2012-12-14 13:48:40	39.57	42.02	5.82187	-40.3364	-42.8338
2012-12-14 13:58:40	39.61	42.05	5.82881	-40.3772	-42.8644
2012-12-14 14:08:40	39.65	42.09	5.83576	-40.4179	-42.9052	2012-12-14 14:08:40
2012-12-14 14:18:40	39.72	42.17	5.8427	-40.4893	-42.9867
2012-12-14 14:28:40	39.79	42.24	5.84965	-40.5607	-43.0581
2012-12-14 14:38:40	39.84	42.26	5.85659	-40.6116	-43.0785
2012-12-14 14:48:40	39.89	42.32	5.86353	-40.6626	-43.1397
2012-12-14 14:58:40	39.93	42.37	5.87048	-40.7034	-43.1906
2012-12-14 15:08:40	39.97	42.37	5.87742	-40.7441	-43.1906	2012-12-14 15:08:40
2012-12-14 15:18:40	40.02	42.44	5.88437	-40.7951	-43.262
2012-12-14 15:28:40	40.05	42.5	5.89131	-40.8257	-43.3231
2012-12-14 15:38:40	40.11	42.56	5.89826	-40.8869	-43.3843
2012-12-14 15:48:40	40.17	42.6	5.9052	-40.948	-43.4251
2012-12-14 15:58:40	40.23	42.67	5.91215	-41.0092	-43.4964
2012-12-14 16:08:40	40.25	42.69	5.91909	-41.0296	-43.5168	2012-12-14 16:08:40
2012-12-14 16:18:40	40.31	42.75	5.92603	-41.0907	-43.578
2012-12-14 16:28:40	40.38	42.83	5.93298	-41.1621	-43.6595
2012-12-14 16:38:40	40.4	42.86	5.93992	-41.1825	-43.6901
2012-12-14 16:48:40	40.43	42.89	5.94687	-41.213	-43.7207
2012-12-14 16:58:40	40.51	42.95	5.95381	-41.2946	-43.7819
2012-12-14 17:08:40	40.56	43	5.96076	-41.3456	-43.8328	2012-12-14 17:08:40
2012-12-14 17:18:40	40.64	43.07	5.9677	-41.4271	-43.9042
2012-12-14 17:28:40	40.67	43.11	5.97465	-41.4577	-43.945
2012-12-14 17:38:40	40.72	43.17	5.98159	-41.5087	-44.0061
2012-12-14 17:48:40	40.78	43.24	5.98853	-41.5698	-44.0775
2012-12-14 17:58:40	40.82	43.26	5.99548	-41.6106	-44.0979
2012-12-14 18:08:40	40.9	43.32	6.00242	-41.6922	-44.159	2012-12-14 18:08:40
2012-12-14 18:18:40	40.93	43.37	6.00937	-41.7227	-44.21
2012-12-14 18:28:40	40.96	43.42	6.01631	-41.7533	-44.261
2012-12-14 18:38:40	41.06	43.51	6.02326	-41.8552	-44.3527
2012-12-14 18:48:40	41.14	43.59	6.0302	-41.9368	-44.4343
2012-12-14 18:58:40	40.76	43.22	6.03715	-41.5494	-44.0571
2012-12-14 19:08:40	40.99	43.45	6.04409	-41.7839	-44.2915	2012-12-14 19:08:40
2012-12-14 19:18:40	41.13	43.59	6.05103	-41.9266	-44.4343
2012-12-14 19:28:40	41.22	43.69	6.05798	-42.0183	-44.5362
2012-12-14 19:38:40	41.33	43.75	6.06492	-42.1305	-44.5973
2012-12-14 19:48:40	41.41	43.87	6.07187	-42.212	-44.7197
2012-12-14 19:58:40	41.47	43.93	6.07881	-42.2732	-44.7808
2012-12-14 20:08:40	41.46	43.91	6.08576	-42.263	-44.7604	2012-12-14 20:08:40
2012-12-14 20:18:40	41.53	43.99	6.0927	-42.3344	-44.842
2012-12-14 20:28:40	41.62	44.03	6.09965	-42.4261	-44.8828
2012-12-14 20:38:40	41.69	44.14	6.10659	-42.4975	-44.9949
2012-12-14 20:48:40	41.71	44.14	6.11353	-42.5178	-44.9949
2012-12-14 20:58:40	41.75	44.2	6.12048	-42.5586	-45.0561
2012-12-14 21:08:40	41.83	44.27	6.12742	-42.6402	-45.1274	2012-12-14 21:08:40
2012-12-14 21:18:40	41.93	44.37	6.13437	-42.7421	-45.2294
2012-12-14 21:28:40	41.98	44.37	6.14131	-42.7931	-45.2294
2012-12-14 21:38:40	42.03	44.48	6.14826	-42.844	-45.3415
2012-12-14 21:48:40	42.1	44.5	6.1552	-42.9154	-45.3619
2012-12-14 21:58:40	42.15	44.6	6.16215	-42.9664	-45.4638
2012-12-14 22:08:40	42.19	44.65	6.16909	-43.0071	-45.5148	2012-12-14 22:08:40
2012-12-14 22:18:40	42.27	44.71	6.17603	-43.0887	-45.5759
2012-12-14 22:28:40	42.32	44.76	6.18298	-43.1397	-45.6269
2012-12-14 22:38:40	42.39	44.83	6.18992	-43.211	-45.6983
2012-12-14 22:48:40	42.47	44.91	6.19687	-43.2926	-45.7798
2012-12-14 22:58:40	42.49	44.96	6.20381	-43.3129	-45.8308
2012-12-14 23:08:40	42.57	45.01	6.21076	-43.3945	-45.8818	2012-12-14 23:08:40
2012-12-14 23:18:40	42.61	45.06	6.2177	-43.4353	-45.9327
2012-12-14 23:28:40	42.68	45.13	6.22465	-43.5066	-46.0041
2012-12-14 23:38:40	42.73	45.18	6.23159	-43.5576	-46.055
2012-12-14 23:48:40	42.79	45.24	6.23853	-43.6188	-46.1162
2012-12-14 23:58:40	42.86	45.3	6.24548	-43.6901	-46.1774
2012-12-15 00:08:40	42.88	45.33	6.25242	-43.7105	-46.208	2012-12-15 00:08:40
2012-12-15 00:18:40	42.92	45.37	6.25937	-43.7513	-46.2487
2012-12-15 00:28:40	43.03	45.48	6.26631	-43.8634	-46.3609
2012-12-15 00:38:40	43.05	45.51	6.27326	-43.8838	-46.3914
2012-12-15 00:48:40	43.1	45.56	6.2802	-43.9348	-46.4424
2012-12-15 00:58:40	43.15	45.61	6.28715	-43.9857	-46.4934
2012-12-15 01:08:40	43.21	45.67	6.29409	-44.0469	-46.5545	2012-12-15 01:08:40
2012-12-15 01:18:40	43.29	45.74	6.30103	-44.1284	-46.6259
2012-12-15 01:28:40	43.33	45.77	6.30798	-44.1692	-46.6565
2012-12-15 01:38:40	43.4	45.85	6.31492	-44.2406	-46.738
2012-12-15 01:48:40	43.47	45.93	6.32187	-44.3119	-46.8196
2012-12-15 01:58:40	43.51	45.97	6.32881	-44.3527	-46.8603
2012-12-15 02:08:40	43.59	46.04	6.33576	-44.4343	-46.9317	2012-12-15 02:08:40
2012-12-15 02:18:40	43.63	46.09	6.3427	-44.475	-46.9827
2012-12-15 02:28:40	43.67	46.12	6.34965	-44.5158	-47.0133
2012-12-15 02:38:40	43.74	46.14	6.35659	-44.5872	-47.0336
2012-12-15 02:48:40	43.8	46.25	6.36353	-44.6483	-47.1458
2012-12-15 02:58:40	43.86	46.31	6.37048	-44.7095	-47.2069
2012-12-15 03:08:40	43.95	46.4	6.37742	-44.8012	-47.2987	2012-12-15 03:08:40
2012-12-15 03:18:40	43.99	46.44	6.38437	-44.842	-47.3394
2012-12-15 03:28:40	44.08	46.51	6.39131	-44.9337	-47.4108
2012-12-15 03:38:40	44.11	46.57	6.39826	-44.9643	-47.472
2012-12-15 03:48:40	44.19	46.64	6.4052	-45.0459	-47.5433
2012-12-15 03:58:40	44.27	46.72	6.41215	-45.1274	-47.6249
2012-12-15 04:08:40	44.29	46.76	6.41909	-45.1478	-47.6656	2012-12-15 04:08:40
2012-12-15 04:18:40	44.36	46.77	6.42603	-45.2192	-47.6758
2012-12-15 04:28:40	44.41	46.87	6.43298	-45.2701	-47.7778
2012-12-15 04:38:40	44.45	46.9	6.43992	-45.3109	-47.8084
2012-12-15 04:48:40	44.51	46.94	6.44687	-45.3721	-47.8491
2012-12-15 04:58:40	44.52	47.01	6.45381	-45.3823	-47.9205
2012-12-15 05:08:40	44.64	47.09	6.46076	-45.5046	-48.002	2012-12-15 05:08:40
2012-12-15 05:18:40	44.7	47.15	6.4677	-45.5657	-48.0632
2012-12-15 05:28:40	44.73	47.18	6.47465	-45.5963	-48.0938
2012-12-15 05:38:40	44.8	47.27	6.48159	-45.6677	-48.1855
2012-12-15 05:48:40	44.86	47.31	6.48853	-45.7288	-48.2263
2012-12-15 05:58:40	44.94	47.34	6.49548	-45.8104	-48.2569
2012-12-15 06:08:40	44.98	47.44	6.50242	-45.8512	-48.3588	2012-12-15 06:08:40
2012-12-15 06:18:40	45.06	47.51	6.50937	-45.9327	-48.4302
2012-12-15 06:28:40	45.11	47.57	6.51631	-45.9837	-48.4913
2012-12-15 06:38:40	45.17	47.63	6.52326	-46.0449	-48.5525
2012-12-15 06:48:40	45.24	47.7	6.5302	-46.1162	-48.6239
2012-12-15 06:58:40	45.31	47.77	6.53715	-46.1876	-48.6952
2012-12-15 07:08:40	45.39	47.8	6.54409	-46.2691	-48.7258	2012-12-15 07:08:40
2012-12-15 07:18:40	45.39	47.86	6.55103	-46.2691	-48.787
2012-12-15 07:28:40	45.47	47.91	6.55798	-46.3507	-48.8379
2012-12-15 07:38:40	45.52	47.99	6.56492	-46.4016	-48.9195
2012-12-15 07:48:40	45.6	48.05	6.57187	-46.4832	-48.9806
2012-12-15 07:58:40	45.65	48.11	6.57881	-46.5341	-49.0418
2012-12-15 08:08:40	45.71	48.17	6.58576	-46.5953	-49.103	2012-12-15 08:08:40
2012-12-15 08:18:40	45.75	48.21	6.5927	-46.6361	-49.1437
2012-12-15 08:28:40	45.8	48.26	6.59965	-46.6871	-49.1947
2012-12-15 08:38:40	45.87	48.33	6.60659	-46.7584	-49.2661
2012-12-15 08:48:40	45.92	48.39	6.61353	-46.8094	-49.3272
2012-12-15 08:58:40	45.96	48.42	6.62048	-46.8502	-49.3578
2012-12-15 09:08:40	46.02	48.49	6.62742	-46.9113	-49.4292	2012-12-15 09:08:40
2012-12-15 09:18:40	46.1	48.56	6.63437	-46.9929	-49.5005
2012-12-15 09:28:40	46.16	48.62	6.64131	-47.054	-49.5617
2012-12-15 09:38:40	46.23	48.69	6.64826	-47.1254	-49.633
2012-12-15 09:48:40	46.3	48.76	6.6552	-47.1967	-49.7044
2012-12-15 09:58:40	46.36	48.82	6.66215	-47.2579	-49.7655
2012-12-15 10:08:40	46.42	48.88	6.66909	-47.3191	-49.8267	2012-12-15 10:08:40
2012-12-15 10:18:40	46.48	48.93	6.67603	-47.3802	-49.8777
2012-12-15 10:28:40	46.52	48.98	6.68298	-47.421	-49.9286
2012-12-15 10:38:40	46.6	49.02	6.68992	-47.5025	-49.9694
2012-12-15 10:48:40	46.64	49.11	6.69687	-47.5433	-50.0612
2012-12-15 10:58:40	46.72	49.19	6.70381	-47.6249	-50.1427
2012-12-15 11:08:40	46.78	49.24	6.71076	-47.686	-50.1937	2012-12-15 11:08:40
2012-12-15 11:18:40	46.85	49.27	6.7177	-47.7574	-50.2243
2012-12-15 11:28:40	46.89	49.37	6.72465	-47.7982	-50.3262
2012-12-15 11:38:40	46.96	49.42	6.73159	-47.8695	-50.3772
2012-12-15 11:48:40	46.78	49.25	6.73853	-47.686	-50.2039
2012-12-15 11:58:40	46.97	49.43	6.74548	-47.8797	-50.3874
2012-12-15 12:08:40	47.04	49.51	6.75242	-47.9511	-50.4689	2012-12-15 12:08:40
2012-12-15 12:18:40	47.12	49.59	6.75937	-48.0326	-50.5505
2012-12-15 12:28:40	47.2	49.66	6.76631	-48.1142	-50.6218
2012-12-15 12:38:40	47.25	49.72	6.77326	-48.1651	-50.683
2012-12-15 12:48:40	47.27	49.77	6.7802	-48.1855	-50.7339
2012-12-15 12:58:40	47.37	49.79	6.78715	-48.2875	-50.7543
2012-12-15 13:08:40	47.41	49.89	6.79409	-48.3282	-50.8563	2012-12-15 13:08:40
2012-12-15 13:18:40	47.48	49.95	6.80103	-48.3996	-50.9174
2012-12-15 13:28:40	47.55	50.01	6.80798	-48.4709	-50.9786
2012-12-15 13:38:40	47.62	50.07	6.81492	-48.5423	-51.0398
2012-12-15 13:48:40	47.68	50.13	6.82187	-48.6035	-51.1009
2012-12-15 13:58:40	47.76	50.22	6.82881	-48.685	-51.1927
2012-12-15 14:08:40	47.81	50.28	6.83576	-48.736	-51.2538	2012-12-15 14:08:40
2012-12-15 14:18:40	47.89	50.35	6.8427	-48.8175	-51.3252
2012-12-15 14:28:40	47.94	50.4	6.84965	-48.8685	-51.3761
2012-12-15 14:38:40	48.02	50.48	6.85659	-48.9501	-51.4577
2012-12-15 14:48:40	48.06	50.54	6.86353	-48.9908	-51.5189
2012-12-15 14:58:40	48.14	50.56	6.87048	-49.0724	-51.5392
2012-12-15 15:08:40	48.19	50.65	6.87742	-49.1233	-51.631	2012-12-15 15:08:40
2012-12-15 15:18:40	48.27	50.74	6.88437	-49.2049	-51.7227
2012-12-15 15:28:40	48.36	50.82	6.89131	-49.2966	-51.8043
2012-12-15 15:38:40	48.39	50.85	6.89826	-49.3272	-51.8349
2012-12-15 15:48:40	48.46	50.93	6.9052	-49.3986	-51.9164
2012-12-15 15:58:40	48.52	50.99	6.91215	-49.4597	-51.9776
2012-12-15 16:08:40	48.59	51.03	6.91909	-49.5311	-52.0183	2012-12-15 16:08:40
2012-12-15 16:18:40	48.66	51.13	6.92603	-49.6024	-52.1203
2012-12-15 16:28:40	48.75	51.17	6.93298	-49.6942	-52.1611
2012-12-15 16:38:40	48.8	51.27	6.93992	-49.7452	-52.263
2012-12-15 16:48:40	48.87	51.34	6.94687	-49.8165	-52.3344
2012-12-15 16:58:40	48.93	51.39	6.95381	-49.8777	-52.3853
2012-12-15 17:08:40	49	51.47	6.96076	-49.949	-52.4669	2012-12-15 17:08:40
2012-12-15 17:18:40	49.09	51.51	6.9677	-50.0408	-52.5076
2012-12-15 17:28:40	49.13	51.6	6.97465	-50.0815	-52.5994
2012-12-15 17:38:40	49.21	51.67	6.98159	-50.1631	-52.6707
2012-12-15 17:48:40	49.27	51.74	6.98853	-50.2243	-52.7421
2012-12-15 17:58:40	49.36	51.82	6.99548	-50.316	-52.8236
2012-12-15 18:08:40	49.42	51.87	7.00242	-50.3772	-52.8746	2012-12-15 18:08:40
2012-12-15 18:18:40	49.47	51.94	7.00937	-50.4281	-52.946
2012-12-15 18:28:40	49.56	52.02	7.01631	-50.5199	-53.0275
2012-12-15 18:38:40	49.65	52.11	7.02326	-50.6116	-53.1193
2012-12-15 18:48:40	49.74	52.2	7.0302	-50.7034	-53.211
2012-12-15 18:58:40	49.79	52.25	7.03715	-50.7543	-53.262
2012-12-15 19:08:40	49.86	52.32	7.04409	-50.8257	-53.3333	2012-12-15 19:08:40
2012-12-15 19:18:40	49.94	52.39	7.05103	-50.9072	-53.4047
2012-12-15 19:28:40	50.02	52.49	7.05798	-50.9888	-53.5066
2012-12-15 19:38:40	50.09	52.54	7.06492	-51.0601	-53.5576
2012-12-15 19:48:40	50.18	52.65	7.07187	-51.1519	-53.6697
2012-12-15 19:58:40	50.24	52.71	7.07881	-51.213	-53.7309
2012-12-15 20:08:40	50.32	52.79	7.08576	-51.2946	-53.8124	2012-12-15 20:08:40
2012-12-15 20:18:40	50.42	52.88	7.0927	-51.3965	-53.9042
2012-12-15 20:28:40	50.5	52.96	7.09965	-51.4781	-53.9857
2012-12-15 20:38:40	50.55	53	7.10659	-51.5291	-54.0265
2012-12-15 20:48:40	50.65	53.12	7.11353	-51.631	-54.1488
2012-12-15 20:58:40	50.74	53.2	7.12048	-51.7227	-54.2304
2012-12-15 21:08:40	50.81	53.28	7.12742	-51.7941	-54.3119	2012-12-15 21:08:40
2012-12-15 21:18:40	50.91	53.38	7.13437	-51.896	-54.4139
2012-12-15 21:28:40	50.99	53.46	7.14131	-51.9776	-54.4954
2012-12-15 21:38:40	51.06	53.53	7.14826	-52.0489	-54.5668
2012-12-15 21:48:40	51.11	53.57	7.1552	-52.0999	-54.6075
2012-12-15 21:58:40	51.19	53.66	7.16215	-52.1814	-54.6993
2012-12-15 22:08:40	51.28	53.75	7.16909	-52.2732	-54.791	2012-12-15 22:08:40
2012-12-15 22:18:40	51.37	53.83	7.17603	-52.3649	-54.8726
2012-12-15 22:28:40	51.43	53.9	7.18298	-52.4261	-54.9439
2012-12-15 22:38:40	51.52	53.99	7.18992	-52.5178	-55.0357
2012-12-15 22:48:40	51.61	54.08	7.19687	-52.6096	-55.1274
2012-12-15 22:58:40	51.68	54.15	7.20381	-52.6809	-55.1988
2012-12-15 23:08:40	51.77	54.24	7.21076	-52.7727	-55.2905	2012-12-15 23:08:40
2012-12-15 23:18:40	51.84	54.31	7.2177	-52.844	-55.3619
2012-12-15 23:28:40	51.93	54.4	7.22465	-52.9358	-55.4536
2012-12-15 23:38:40	52.02	54.45	7.23159	-53.0275	-55.5046
2012-12-15 23:48:40	52.1	54.57	7.23853	-53.1091	-55.6269
2012-12-15 23:58:40	52.18	54.65	7.24548	-53.1906	-55.7085
2012-12-16 00:08:40	52.28	54.7	7.25242	-53.2926	-55.7594	2012-12-16 00:08:40
2012-12-16 00:18:40	52.36	54.82	7.25937	-53.3741	-55.8818
2012-12-16 00:28:40	52.43	54.9	7.26631	-53.4455	-55.9633
2012-12-16 00:38:40	52.51	54.98	7.27326	-53.527	-56.0449
2012-12-16 00:48:40	52.6	55.06	7.2802	-53.6188	-56.1264
2012-12-16 00:58:40	52.67	55.13	7.28715	-53.6901	-56.1978
2012-12-16 01:08:40	52.77	55.24	7.29409	-53.792	-56.3099	2012-12-16 01:08:40
2012-12-16 01:18:40	52.88	55.31	7.30103	-53.9042	-56.3812
2012-12-16 01:28:40	52.93	55.4	7.30798	-53.9551	-56.473
2012-12-16 01:38:40	53.02	55.49	7.31492	-54.0469	-56.5647
2012-12-16 01:48:40	53.1	55.57	7.32187	-54.1284	-56.6463
2012-12-16 01:58:40	53.17	55.64	7.32881	-54.1998	-56.7176
2012-12-16 02:08:40	53.27	55.74	7.33576	-54.3017	-56.8196	2012-12-16 02:08:40
2012-12-16 02:18:40	53.38	55.85	7.3427	-54.4139	-56.9317
2012-12-16 02:28:40	53.46	55.92	7.34965	-54.4954	-57.0031
2012-12-16 02:38:40	53.55	56.01	7.35659	-54.5872	-57.0948
2012-12-16 02:48:40	53.64	56.12	7.36353	-54.6789	-57.2069
2012-12-16 02:58:40	53.74	56.21	7.37048	-54.7808	-57.2987
2012-12-16 03:08:40	53.82	56.29	7.37742	-54.8624	-57.3802	2012-12-16 03:08:40
2012-12-16 03:18:40	53.91	56.38	7.38437	-54.9541	-57.472
2012-12-16 03:28:40	53.98	56.45	7.39131	-55.0255	-57.5433
2012-12-16 03:38:40	54.09	56.56	7.39826	-55.1376	-57.6555
2012-12-16 03:48:40	54.18	56.64	7.4052	-55.2294	-57.737
2012-12-16 03:58:40	54.26	56.74	7.41215	-55.3109	-57.8389
2012-12-16 04:08:40	54.38	56.8	7.41909	-55.4332	-57.9001	2012-12-16 04:08:40
2012-12-16 04:18:40	54.46	56.94	7.42603	-55.5148	-58.0428
2012-12-16 04:28:40	54.57	57.03	7.43298	-55.6269	-58.1346
2012-12-16 04:38:40	54.66	57.13	7.43992	-55.7187	-58.2365
2012-12-16 04:48:40	54.75	57.23	7.44687	-55.8104	-58.3384
2012-12-16 04:58:40	54.85	57.32	7.45381	-55.9123	-58.4302
2012-12-16 05:08:40	54.93	57.4	7.46076	-55.9939	-58.5117	2012-12-16 05:08:40
2012-12-16 05:18:40	55.04	57.51	7.4677	-56.106	-58.6239
2012-12-16 05:28:40	55.14	57.61	7.47465	-56.208	-58.7258
2012-12-16 05:38:40	55.23	57.7	7.48159	-56.2997	-58.8175
2012-12-16 05:48:40	55.31	57.77	7.48853	-56.3812	-58.8889
2012-12-16 05:58:40	55.4	57.87	7.49548	-56.473	-58.9908
2012-12-16 06:08:40	55.49	57.95	7.50242	-56.5647	-59.0724	2012-12-16 06:08:40
2012-12-16 06:18:40	55.57	58.04	7.50937	-56.6463	-59.1641
2012-12-16 06:28:40	55.68	58.15	7.51631	-56.7584	-59.2762
2012-12-16 06:38:40	55.79	58.22	7.52326	-56.8705	-59.3476
2012-12-16 06:48:40	55.87	58.35	7.5302	-56.9521	-59.4801
2012-12-16 06:58:40	55.96	58.44	7.53715	-57.0438	-59.5719
2012-12-16 07:08:40	56.07	58.55	7.54409	-57.156	-59.684	2012-12-16 07:08:40
2012-12-16 07:18:40	56.17	58.65	7.55103	-57.2579	-59.7859
2012-12-16 07:28:40	56.26	58.73	7.55798	-57.3496	-59.8675
2012-12-16 07:38:40	56.36	58.84	7.56492	-57.4516	-59.9796
2012-12-16 07:48:40	56.46	58.94	7.57187	-57.5535	-60.0815
2012-12-16 07:58:40	56.59	59.02	7.57881	-57.686	-60.1631
2012-12-16 08:08:40	56.66	59.14	7.58576	-57.7574	-60.2854	2012-12-16 08:08:40
2012-12-16 08:18:40	56.77	59.25	7.5927	-57.8695	-60.3976
2012-12-16 08:28:40	56.88	59.31	7.59965	-57.9817	-60.4587
2012-12-16 08:38:40	56.94	59.43	7.60659	-58.0428	-60.581
2012-12-16 08:48:40	57.03	59.51	7.61353	-58.1346	-60.6626
2012-12-16 08:58:40	57.12	59.6	7.62048	-58.2263	-60.7543
2012-12-16 09:08:40	57.25	59.68	7.62742	-58.3588	-60.8359	2012-12-16 09:08:40
2012-12-16 09:18:40	57.31	59.78	7.63437	-58.42	-60.9378
2012-12-16 09:28:40	57.42	59.9	7.64131	-58.5321	-61.0601
2012-12-16 09:38:40	57.53	59.97	7.64826	-58.6442	-61.1315
2012-12-16 09:48:40	57.61	60.08	7.6552	-58.7258	-61.2436
2012-12-16 09:58:40	57.71	60.14	7.66215	-58.8277	-61.3048
2012-12-16 10:08:40	57.82	60.31	7.66909	-58.9399	-61.4781	2012-12-16 10:08:40
2012-12-16 10:18:40	57.93	60.4	7.67603	-59.052	-61.5698
2012-12-16 10:28:40	58.04	60.5	7.68298	-59.1641	-61.6718
2012-12-16 10:38:40	58.12	60.6	7.68992	-59.2457	-61.7737
2012-12-16 10:48:40	58.2	60.69	7.69687	-59.3272	-61.8654
2012-12-16 10:58:40	58.31	60.79	7.70381	-59.4393	-61.9674
2012-12-16 11:08:40	58.42	60.9	7.71076	-59.5515	-62.0795	2012-12-16 11:08:40
2012-12-16 11:18:40	58.5	61	7.7177	-59.633	-62.1814
2012-12-16 11:28:40	58.61	61.09	7.72465	-59.7452	-62.2732
2012-12-16 11:38:40	58.72	61.19	7.73159	-59.8573	-62.3751
2012-12-16 11:48:40	58.81	61.29	7.73853	-59.949	-62.4771
2012-12-16 11:58:40	58.92	61.4	7.74548	-60.0612	-62.5892
2012-12-16 12:08:40	59.05	61.54	7.75242	-60.1937	-62.7319	2012-12-16 12:08:40
2012-12-16 12:18:40	59.15	61.64	7.75937	-60.2956	-62.8338
2012-12-16 12:28:40	59.27	61.75	7.76631	-60.4179	-62.946
2012-12-16 12:38:40	59.38	61.86	7.77326	-60.5301	-63.0581
2012-12-16 12:48:40	59.45	61.94	7.7802	-60.6014	-63.1397
2012-12-16 12:58:40	59.56	62.05	7.78715	-60.7136	-63.2518
2012-12-16 13:08:40	59.66	62.14	7.79409	-60.8155	-63.3435	2012-12-16 13:08:40
2012-12-16 13:18:40	59.77	62.26	7.80103	-60.9276	-63.4659
2012-12-16 13:28:40	59.89	62.34	7.80798	-61.0499	-63.5474
2012-12-16 13:38:40	60	62.47	7.81492	-61.1621	-63.6799
2012-12-16 13:48:40	60.1	62.6	7.82187	-61.264	-63.8124
2012-12-16 13:58:40	60.22	62.7	7.82881	-61.3863	-63.9144
2012-12-16 14:08:40	60.33	62.81	7.83576	-61.4985	-64.0265	2012-12-16 14:08:40
2012-12-16 14:18:40	60.43	62.91	7.8427	-61.6004	-64.1284
2012-12-16 14:28:40	60.54	63.02	7.84965	-61.7125	-64.2406
2012-12-16 14:38:40	60.66	63.16	7.85659	-61.8349	-64.3833
2012-12-16 14:48:40	60.66	63.15	7.86353	-61.8349	-64.3731
2012-12-16 14:58:40	60.84	63.26	7.87048	-62.0183	-64.4852
2012-12-16 15:08:40	60.95	63.42	7.87742	-62.1305	-64.6483	2012-12-16 15:08:40
2012-12-16 15:18:40	61.06	63.53	7.88437	-62.2426	-64.7604
2012-12-16 15:28:40	61.17	63.64	7.89131	-62.3547	-64.8726
2012-12-16 15:38:40	61.31	63.76	7.89826	-62.4975	-64.9949
2012-12-16 15:48:40	61.39	63.83	7.9052	-62.579	-65.0663
2012-12-16 15:58:40	61.51	63.99	7.91215	-62.7013	-65.2294
2012-12-16 16:08:40	61.61	64.08	7.91909	-62.8033	-65.3211	2012-12-16 16:08:40
2012-12-16 16:18:40	61.71	64.19	7.92603	-62.9052	-65.4332
2012-12-16 16:28:40	61.84	64.26	7.93298	-63.0377	-65.5046
2012-12-16 16:38:40	61.94	64.42	7.93992	-63.1397	-65.6677
2012-12-16 16:48:40	62.06	64.55	7.94687	-63.262	-65.8002
2012-12-16 16:58:40	62.19	64.67	7.95381	-63.3945	-65.9225
2012-12-16 17:08:40	62.31	64.79	7.96076	-63.5168	-66.0449	2012-12-16 17:08:40
2012-12-16 17:18:40	62.44	64.89	7.9677	-63.6493	-66.1468
2012-12-16 17:28:40	62.54	65.01	7.97465	-63.7513	-66.2691
2012-12-16 17:38:40	62.67	65.14	7.98159	-63.8838	-66.4016
2012-12-16 17:48:40	62.73	65.27	7.98853	-63.945	-66.5341
2012-12-16 17:58:40	62.9	65.38	7.99548	-64.1182	-66.6463
2012-12-16 18:08:40	63.03	65.49	8.00242	-64.2508	-66.7584	2012-12-16 18:08:40
2012-12-16 18:18:40	63.14	65.61	8.00937	-64.3629	-66.8807
2012-12-16 18:28:40	63.28	65.71	8.01631	-64.5056	-66.9827
2012-12-16 18:38:40	63.4	65.81	8.02326	-64.6279	-67.0846
2012-12-16 18:48:40	63.51	65.97	8.0302	-64.7401	-67.2477
2012-12-16 18:58:40	63.65	66.13	8.03715	-64.8828	-67.4108
2012-12-16 19:08:40	63.78	66.27	8.04409	-65.0153	-67.5535	2012-12-16 19:08:40
2012-12-16 19:18:40	63.92	66.39	8.05103	-65.158	-67.6758
2012-12-16 19:28:40	64.05	66.52	8.05798	-65.2905	-67.8084
2012-12-16 19:38:40	64.18	66.64	8.06492	-65.423	-67.9307
2012-12-16 19:48:40	64.32	66.8	8.07187	-65.5657	-68.0938
2012-12-16 19:58:40	64.44	66.91	8.07881	-65.6881	-68.2059
2012-12-16 20:08:40	64.58	67.06	8.08576	-65.8308	-68.3588	2012-12-16 20:08:40
2012-12-16 20:18:40	64.73	67.21	8.0927	-65.9837	-68.5117
2012-12-16 20:28:40	64.87	67.35	8.09965	-66.1264	-68.6544
2012-12-16 20:38:40	64.99	67.46	8.10659	-66.2487	-68.7666
2012-12-16 20:48:40	65.13	67.58	8.11353	-66.3914	-68.8889
2012-12-16 20:58:40	65.25	67.73	8.12048	-66.5138	-69.0418
2012-12-16 21:08:40	65.37	67.85	8.12742	-66.6361	-69.1641	2012-12-16 21:08:40
2012-12-16 21:18:40	65.52	68.01	8.13437	-66.789	-69.3272
2012-12-16 21:28:40	65.68	68.16	8.14131	-66.9521	-69.4801
2012-12-16 21:38:40	65.82	68.26	8.14826	-67.0948	-69.5821
2012-12-16 21:48:40	65.95	68.44	8.1552	-67.2273	-69.7655
2012-12-16 21:58:40	66.09	68.58	8.16215	-67.37	-69.9083
2012-12-16 22:08:40	66.22	68.71	8.16909	-67.5025	-70.0408	2012-12-16 22:08:40
2012-12-16 22:18:40	66.34	68.8	8.17603	-67.6249	-70.1325
2012-12-16 22:28:40	66.48	68.96	8.18298	-67.7676	-70.2956
2012-12-16 22:38:40	66.64	69.13	8.18992	-67.9307	-70.4689
2012-12-16 22:48:40	66.75	69.2	8.19687	-68.0428	-70.5403
2012-12-16 22:58:40	66.91	69.39	8.20381	-68.2059	-70.7339
2012-12-16 23:08:40	67.07	69.51	8.21076	-68.369	-70.8563	2012-12-16 23:08:40
2012-12-16 23:18:40	67.19	69.68	8.2177	-68.4913	-71.0296
2012-12-16 23:28:40	67.33	69.78	8.22465	-68.634	-71.1315
2012-12-16 23:38:40	67.47	69.96	8.23159	-68.7768	-71.315
2012-12-16 23:48:40	67.6	70.1	8.23853	-68.9093	-71.4577
2012-12-16 23:58:40	67.76	70.23	8.24548	-69.0724	-71.5902
2012-12-17 00:08:40	67.93	70.4	8.25242	-69.2457	-71.7635	2012-12-17 00:08:40
2012-12-17 00:18:40	68.06	70.53	8.25937	-69.3782	-71.896
2012-12-17 00:28:40	68.19	70.67	8.26631	-69.5107	-72.0387
2012-12-17 00:38:40	68.29	70.79	8.27326	-69.6126	-72.1611
2012-12-17 00:48:40	68.46	70.95	8.2802	-69.7859	-72.3242
2012-12-17 00:58:40	68.6	71.09	8.28715	-69.9286	-72.4669
2012-12-17 01:08:40	68.75	71.23	8.29409	-70.0815	-72.6096	2012-12-17 01:08:40
2012-12-17 01:18:40	68.88	71.37	8.30103	-70.2141	-72.7523
2012-12-17 01:28:40	69.03	71.51	8.30798	-70.367	-72.895
2012-12-17 01:38:40	69.16	71.63	8.31492	-70.4995	-73.0173
2012-12-17 01:48:40	69.3	71.79	8.32187	-70.6422	-73.1804
2012-12-17 01:58:40	69.44	71.94	8.32881	-70.7849	-73.3333
2012-12-17 02:08:40	69.61	72.1	8.33576	-70.9582	-73.4964	2012-12-17 02:08:40
2012-12-17 02:18:40	69.75	72.24	8.3427	-71.1009	-73.6391
2012-12-17 02:28:40	69.87	72.37	8.34965	-71.2232	-73.7717
2012-12-17 02:38:40	70.02	72.52	8.35659	-71.3761	-73.9246
2012-12-17 02:48:40	70.17	72.67	8.36353	-71.5291	-74.0775
2012-12-17 02:58:40	70.34	72.85	8.37048	-71.7023	-74.261
2012-12-17 03:08:40	70.51	72.95	8.37742	-71.8756	-74.3629	2012-12-17 03:08:40
2012-12-17 03:18:40	70.65	73.15	8.38437	-72.0183	-74.5668
2012-12-17 03:28:40	70.82	73.3	8.39131	-72.1916	-74.7197
2012-12-17 03:38:40	70.97	73.47	8.39826	-72.3445	-74.893
2012-12-17 03:48:40	71.13	73.61	8.4052	-72.5076	-75.0357
2012-12-17 03:58:40	71.27	73.77	8.41215	-72.6504	-75.1988
2012-12-17 04:08:40	71.43	73.92	8.41909	-72.8135	-75.3517	2012-12-17 04:08:40
2012-12-17 04:18:40	71.57	74.08	8.42603	-72.9562	-75.5148
2012-12-17 04:28:40	71.74	74.23	8.43298	-73.1295	-75.6677
2012-12-17 04:38:40	71.89	74.38	8.43992	-73.2824	-75.8206
2012-12-17 04:48:40	72.02	74.53	8.44687	-73.4149	-75.9735
2012-12-17 04:58:40	72.14	74.64	8.45381	-73.5372	-76.0856
2012-12-17 05:08:40	72.32	74.81	8.46076	-73.7207	-76.2589	2012-12-17 05:08:40
2012-12-17 05:18:40	72.43	74.94	8.4677	-73.8328	-76.3914
2012-12-17 05:28:40	72.6	75.1	8.47465	-74.0061	-76.5545
2012-12-17 05:38:40	72.74	75.25	8.48159	-74.1488	-76.7074
2012-12-17 05:48:40	72.89	75.4	8.48853	-74.3017	-76.8603
2012-12-17 05:58:40	73.03	75.55	8.49548	-74.4444	-77.0133
2012-12-17 06:08:40	73.14	75.66	8.50242	-74.5566	-77.1254	2012-12-17 06:08:40
2012-12-17 06:18:40	73.32	75.83	8.50937	-74.7401	-77.2987
2012-12-17 06:28:40	73.47	75.97	8.51631	-74.893	-77.4414
2012-12-17 06:38:40	73.63	76.09	8.52326	-75.0561	-77.5637
2012-12-17 06:48:40	73.78	76.29	8.5302	-75.209	-77.7676
2012-12-17 06:58:40	73.92	76.42	8.53715	-75.3517	-77.9001
2012-12-17 07:08:40	74.1	76.58	8.54409	-75.5352	-78.0632	2012-12-17 07:08:40
2012-12-17 07:18:40	74.28	76.78	8.55103	-75.7187	-78.2671
2012-12-17 07:28:40	74.43	76.94	8.55798	-75.8716	-78.4302
2012-12-17 07:38:40	74.56	77.04	8.56492	-76.0041	-78.5321
2012-12-17 07:48:40	74.72	77.22	8.57187	-76.1672	-78.7156
2012-12-17 07:58:40	74.92	77.4	8.57881	-76.371	-78.8991
2012-12-17 08:08:40	75.07	77.59	8.58576	-76.524	-79.0928	2012-12-17 08:08:40
2012-12-17 08:18:40	75.2	77.72	8.5927	-76.6565	-79.2253
2012-12-17 08:28:40	75.4	77.91	8.59965	-76.8603	-79.419
2012-12-17 08:38:40	75.54	78.06	8.60659	-77.0031	-79.5719
2012-12-17 08:48:40	75.71	78.22	8.61353	-77.1764	-79.735
2012-12-17 08:58:40	75.88	78.39	8.62048	-77.3496	-79.9083
2012-12-17 09:08:40	75.46	77.97	8.62742	-76.9215	-79.4801	2012-12-17 09:08:40
2012-12-17 09:18:40	75.82	78.34	8.63437	-77.2885	-79.8573
2012-12-17 09:28:40	76.03	78.57	8.64131	-77.5025	-80.0917
2012-12-17 09:38:40	76.21	78.74	8.64826	-77.686	-80.265
2012-12-17 09:48:40	76.42	78.96	8.6552	-77.9001	-80.4893
2012-12-17 09:58:40	76.58	79.12	8.66215	-78.0632	-80.6524
2012-12-17 10:08:40	76.75	79.26	8.66909	-78.2365	-80.7951	2012-12-17 10:08:40
2012-12-17 10:18:40	76.93	79.47	8.67603	-78.42	-81.0092
2012-12-17 10:28:40	77.1	79.6	8.68298	-78.5933	-81.1417
2012-12-17 10:38:40	77.35	79.89	8.68992	-78.8481	-81.4373
2012-12-17 10:48:40	77.13	79.63	8.69687	-78.6239	-81.1723
2012-12-17 10:58:40	77.51	80.01	8.70381	-79.0112	-81.5596
2012-12-17 11:08:40	77.77	80.31	8.71076	-79.2762	-81.8654	2012-12-17 11:08:40
2012-12-17 11:18:40	78.04	80.58	8.7177	-79.5515	-82.1407
2012-12-17 11:28:40	78.21	80.74	8.72465	-79.7248	-82.3038
2012-12-17 11:38:40	78.39	80.89	8.73159	-79.9083	-82.4567
2012-12-17 11:48:40	78.54	81.05	8.73853	-80.0612	-82.6198
2012-12-17 11:58:40	78.73	81.2	8.74548	-80.2548	-82.7727
2012-12-17 12:08:40	78.92	81.45	8.75242	-80.4485	-83.0275	2012-12-17 12:08:40
2012-12-17 12:18:40	79.1	81.63	8.75937	-80.632	-83.211
2012-12-17 12:28:40	79.26	81.8	8.76631	-80.7951	-83.3843
2012-12-17 12:38:40	79.46	81.99	8.77326	-80.999	-83.578
2012-12-17 12:48:40	79.64	82.17	8.7802	-81.1825	-83.7615
2012-12-17 12:58:40	79.83	82.36	8.78715	-81.3761	-83.9551
2012-12-17 13:08:40	80.02	82.55	8.79409	-81.5698	-84.1488	2012-12-17 13:08:40
2012-12-17 13:18:40	80.21	82.74	8.80103	-81.7635	-84.3425
2012-12-17 13:28:40	80.38	82.92	8.80798	-81.9368	-84.526
2012-12-17 13:38:40	80.55	83.08	8.81492	-82.1101	-84.6891
2012-12-17 13:48:40	80.74	83.22	8.82187	-82.3038	-84.8318
2012-12-17 13:58:40	80.91	83.44	8.82881	-82.4771	-85.0561
2012-12-17 14:08:40	81.1	83.65	8.83576	-82.6707	-85.2701	2012-12-17 14:08:40
2012-12-17 14:18:40	81.26	83.8	8.8427	-82.8338	-85.423
2012-12-17 14:28:40	81.46	84	8.84965	-83.0377	-85.6269
2012-12-17 14:38:40	81.64	84.19	8.85659	-83.2212	-85.8206
2012-12-17 14:48:40	81.76	84.31	8.86353	-83.3435	-85.9429
2012-12-17 14:58:40	81.93	84.48	8.87048	-83.5168	-86.1162
2012-12-17 15:08:40	82.1	84.65	8.87742	-83.6901	-86.2895	2012-12-17 15:08:40
2012-12-17 15:18:40	82.29	84.84	8.88437	-83.8838	-86.4832
2012-12-17 15:28:40	82.46	85.01	8.89131	-84.0571	-86.6565
2012-12-17 15:38:40	82.66	85.2	8.89826	-84.261	-86.8502
2012-12-17 15:48:40	82.83	85.32	8.9052	-84.4343	-86.9725
2012-12-17 15:58:40	83.01	85.5	8.91215	-84.6177	-87.156
2012-12-17 16:08:40	83.18	85.73	8.91909	-84.791	-87.3904	2012-12-17 16:08:40
2012-12-17 16:18:40	83.36	85.93	8.92603	-84.9745	-87.5943
2012-12-17 16:28:40	83.57	86.11	8.93298	-85.1886	-87.7778
2012-12-17 16:38:40	83.74	86.29	8.93992	-85.3619	-87.9613
2012-12-17 16:48:40	83.93	86.46	8.94687	-85.5556	-88.1346
2012-12-17 16:58:40	84.08	86.62	8.95381	-85.7085	-88.2977
2012-12-17 17:08:40	84.27	86.81	8.96076	-85.9021	-88.4913	2012-12-17 17:08:40
2012-12-17 17:18:40	84.46	87.01	8.9677	-86.0958	-88.6952
2012-12-17 17:28:40	84.65	87.2	8.97465	-86.2895	-88.8889
2012-12-17 17:38:40	84.79	87.37	8.98159	-86.4322	-89.0622
2012-12-17 17:48:40	84.99	87.55	8.98853	-86.6361	-89.2457
2012-12-17 17:58:40	85.18	87.73	8.99548	-86.8298	-89.4292
2012-12-17 18:08:40	85.37	87.87	9.00242	-87.0234	-89.5719	2012-12-17 18:08:40
2012-12-17 18:18:40	85.55	88.1	9.00937	-87.2069	-89.8063
2012-12-17 18:28:40	85.68	88.21	9.01631	-87.3394	-89.9185
2012-12-17 18:38:40	85.9	88.45	9.02326	-87.5637	-90.1631
2012-12-17 18:48:40	86.09	88.65	9.0302	-87.7574	-90.367
2012-12-17 18:58:40	86.29	88.83	9.03715	-87.9613	-90.5505
2012-12-17 19:08:40	86.48	89.02	9.04409	-88.1549	-90.7441	2012-12-17 19:08:40
2012-12-17 19:18:40	86.69	89.25	9.05103	-88.369	-90.9786
2012-12-17 19:28:40	86.86	89.42	9.05798	-88.5423	-91.1519
2012-12-17 19:38:40	87.06	89.62	9.06492	-88.7462	-91.3558
2012-12-17 19:48:40	87.26	89.82	9.07187	-88.9501	-91.5596
2012-12-17 19:58:40	87.45	90.02	9.07881	-89.1437	-91.7635
2012-12-17 20:08:40	87.64	90.2	9.08576	-89.3374	-91.947	2012-12-17 20:08:40
2012-12-17 20:18:40	87.84	90.39	9.0927	-89.5413	-92.1407
2012-12-17 20:28:40	88.02	90.59	9.09965	-89.7248	-92.3445
2012-12-17 20:38:40	88.22	90.79	9.10659	-89.9286	-92.5484
2012-12-17 20:48:40	88.45	91.01	9.11353	-90.1631	-92.7727
2012-12-17 20:58:40	88.63	91.17	9.12048	-90.3466	-92.9358
2012-12-17 21:08:40	88.84	91.4	9.12742	-90.5607	-93.1702	2012-12-17 21:08:40
2012-12-17 21:18:40	89.03	91.55	9.13437	-90.7543	-93.3231
2012-12-17 21:28:40	89.22	91.78	9.14131	-90.948	-93.5576
2012-12-17 21:38:40	89.4	91.98	9.14826	-91.1315	-93.7615
2012-12-17 21:48:40	89.58	92.14	9.1552	-91.315	-93.9246
2012-12-17 21:58:40	89.78	92.36	9.16215	-91.5189	-94.1488
2012-12-17 22:08:40	89.93	92.53	9.16909	-91.6718	-94.3221	2012-12-17 22:08:40
2012-12-17 22:18:40	90.14	92.72	9.17603	-91.8858	-94.5158
2012-12-17 22:28:40	90.34	92.92	9.18298	-92.0897	-94.7197
2012-12-17 22:38:40	90.56	93.14	9.18992	-92.314	-94.9439
2012-12-17 22:48:40	90.77	93.34	9.19687	-92.528	-95.1478
2012-12-17 22:58:40	90.98	93.55	9.20381	-92.7421	-95.3619
2012-12-17 23:08:40	91.16	93.74	9.21076	-92.9256	-95.5556	2012-12-17 23:08:40
2012-12-17 23:18:40	91.38	93.95	9.2177	-93.1498	-95.7696
2012-12-17 23:28:40	91.59	94.16	9.22465	-93.3639	-95.9837
2012-12-17 23:38:40	91.79	94.37	9.23159	-93.5678	-96.1978
2012-12-17 23:48:40	91.99	94.56	9.23853	-93.7717	-96.3914
2012-12-17 23:58:40	92.17	94.75	9.24548	-93.9551	-96.5851
2012-12-18 00:08:40	92.4	94.99	9.25242	-94.1896	-96.8298	2012-12-18 00:08:40
2012-12-18 00:18:40	92.62	95.19	9.25937	-94.4139	-97.0336
2012-12-18 00:28:40	92.82	95.42	9.26631	-94.6177	-97.2681
2012-12-18 00:38:40	93	95.59	9.27326	-94.8012	-97.4414
2012-12-18 00:48:40	93.25	95.84	9.2802	-95.0561	-97.6962
2012-12-18 00:58:40	93.43	96.04	9.28715	-95.2396	-97.9001
2012-12-18 01:08:40	93.66	96.24	9.29409	-95.474	-98.104	2012-12-18 01:08:40
2012-12-18 01:18:40	93.85	96.45	9.30103	-95.6677	-98.318
2012-12-18 01:28:40	94.07	96.64	9.30798	-95.8919	-98.5117
2012-12-18 01:38:40	94.27	96.87	9.31492	-96.0958	-98.7462
2012-12-18 01:48:40	94.5	97.08	9.32187	-96.3303	-98.9602
2012-12-18 01:58:40	94.72	97.27	9.32881	-96.5545	-99.1539
2012-12-18 02:08:40	94.91	97.51	9.33576	-96.7482	-99.3986	2012-12-18 02:08:40
2012-12-18 02:18:40	95.14	97.73	9.3427	-96.9827	-99.6228
2012-12-18 02:28:40	95.35	97.95	9.34965	-97.1967	-99.8471
2012-12-18 02:38:40	95.56	98.17	9.35659	-97.4108	-100.071
2012-12-18 02:48:40	95.78	98.35	9.36353	-97.6351	-100.255
2012-12-18 02:58:40	96.02	98.6	9.37048	-97.8797	-100.51
2012-12-18 03:08:40	96.23	98.84	9.37742	-98.0938	-100.754	2012-12-18 03:08:40
2012-12-18 03:18:40	96.46	99.05	9.38437	-98.3282	-100.968
2012-12-18 03:28:40	96.65	99.27	9.39131	-98.5219	-101.193
2012-12-18 03:38:40	96.88	99.49	9.39826	-98.7564	-101.417
2012-12-18 03:48:40	97.12	99.72	9.4052	-99.001	-101.651
2012-12-18 03:58:40	97.33	99.93	9.41215	-99.2151	-101.865
2012-12-18 04:08:40	97.56	100.13	9.41909	-99.4495	-102.069	2012-12-18 04:08:40
2012-12-18 04:18:40	97.79	100.36	9.42603	-99.684	-102.304
2012-12-18 04:28:40	98.01	100.63	9.43298	-99.9083	-102.579
2012-12-18 04:38:40	98.24	100.86	9.43992	-100.143	-102.813
2012-12-18 04:48:40	98.43	101.05	9.44687	-100.336	-103.007
2012-12-18 04:58:40	98.69	101.25	9.45381	-100.601	-103.211
2012-12-18 05:08:40	98.91	101.52	9.46076	-100.826	-103.486	2012-12-18 05:08:40
2012-12-18 05:18:40	99.13	101.75	9.4677	-101.05	-103.721
2012-12-18 05:28:40	99.34	101.91	9.47465	-101.264	-103.884
2012-12-18 05:38:40	99.54	102.16	9.48159	-101.468	-104.139
2012-12-18 05:48:40	99.79	102.39	9.48853	-101.723	-104.373
2012-12-18 05:58:40	100.02	102.6	9.49548	-101.957	-104.587
2012-12-18 06:08:40	100.26	102.89	9.50242	-102.202	-104.883	2012-12-18 06:08:40
2012-12-18 06:18:40	100.49	103.11	9.50937	-102.436	-105.107
2012-12-18 06:28:40	100.7	103.34	9.51631	-102.65	-105.341
2012-12-18 06:38:40	100.94	103.56	9.52326	-102.895	-105.566
2012-12-18 06:48:40	101.19	103.8	9.5302	-103.15	-105.81
2012-12-18 06:58:40	101.38	104.02	9.53715	-103.344	-106.035
2012-12-18 07:08:40	101.61	104.25	9.54409	-103.578	-106.269	2012-12-18 07:08:40
2012-12-18 07:18:40	101.83	104.46	9.55103	-103.802	-106.483
2012-12-18 07:28:40	102.05	104.66	9.55798	-104.027	-106.687
2012-12-18 07:38:40	102.25	104.88	9.56492	-104.23	-106.911
2012-12-18 07:48:40	102.47	105.11	9.57187	-104.455	-107.146
2012-12-18 07:58:40	102.7	105.33	9.57881	-104.689	-107.37
2012-12-18 08:08:40	102.92	105.56	9.58576	-104.913	-107.604	2012-12-18 08:08:40
2012-12-18 08:18:40	103.14	105.78	9.5927	-105.138	-107.829
2012-12-18 08:28:40	102.36	105.33	9.59965	-104.343	-107.37
2012-12-18 08:38:40	103.21	105.83	9.60659	-105.209	-107.88
2012-12-18 08:48:40	103.59	106.22	9.61353	-105.596	-108.277
2012-12-18 08:58:40	103.86	106.47	9.62048	-105.872	-108.532
2012-12-18 09:08:40	104.09	106.71	9.62742	-106.106	-108.777	2012-12-18 09:08:40
2012-12-18 09:18:40	104.33	106.96	9.63437	-106.351	-109.032
2012-12-18 09:28:40	104.58	107.19	9.64131	-106.606	-109.266
2012-12-18 09:38:40	104.82	107.42	9.64826	-106.85	-109.501
2012-12-18 09:48:40	105.06	107.67	9.6552	-107.095	-109.755
2012-12-18 09:58:40	105.28	107.91	9.66215	-107.319	-110
2012-12-18 10:08:40	105.54	108.18	9.66909	-107.584	-110.275	2012-12-18 10:08:40
2012-12-18 10:18:40	105.77	108.4	9.67603	-107.819	-110.499
2012-12-18 10:28:40	106.03	108.65	9.68298	-108.084	-110.754
2012-12-18 10:38:40	106.24	108.88	9.68992	-108.298	-110.989
2012-12-18 10:48:40	106.5	109.12	9.69687	-108.563	-111.233
2012-12-18 10:58:40	106.73	109.36	9.70381	-108.797	-111.478
2012-12-18 11:08:40	107.02	109.61	9.71076	-109.093	-111.733	2012-12-18 11:08:40
2012-12-18 11:18:40	107.23	109.9	9.7177	-109.307	-112.029
2012-12-18 11:28:40	107.49	110.13	9.72465	-109.572	-112.263
2012-12-18 11:38:40	107.66	110.35	9.73159	-109.745	-112.487
2012-12-18 11:48:40	107.93	110.59	9.73853	-110.02	-112.732
2012-12-18 11:58:40	108.18	110.86	9.74548	-110.275	-113.007
2012-12-18 12:08:40	108.47	111.11	9.75242	-110.571	-113.262	2012-12-18 12:08:40
2012-12-18 12:18:40	108.72	111.39	9.75937	-110.826	-113.547
2012-12-18 12:28:40	109	111.65	9.76631	-111.111	-113.812
2012-12-18 12:38:40	109.25	111.92	9.77326	-111.366	-114.088
2012-12-18 12:48:40	109.5	112.19	9.7802	-111.621	-114.363
2012-12-18 12:58:40	109.78	112.43	9.78715	-111.906	-114.608
2012-12-18 13:08:40	110.05	112.69	9.79409	-112.181	-114.873	2012-12-18 13:08:40
2012-12-18 13:18:40	110.3	112.95	9.80103	-112.436	-115.138
2012-12-18 13:28:40	110.54	113.21	9.80798	-112.681	-115.403
2012-12-18 13:38:40	110.83	113.45	9.81492	-112.977	-115.647
2012-12-18 13:48:40	111.05	113.74	9.82187	-113.201	-115.943
2012-12-18 13:58:40	111.3	113.83	9.82881	-113.456	-116.035
2012-12-18 14:08:40	111.56	114.24	9.83576	-113.721	-116.453	2012-12-18 14:08:40
2012-12-18 14:18:40	111.76	114.45	9.8427	-113.925	-116.667
2012-12-18 14:28:40	112.05	114.74	9.84965	-114.22	-116.962
2012-12-18 14:38:40	112.35	114.99	9.85659	-114.526	-117.217
2012-12-18 14:48:40	112.62	115.29	9.86353	-114.801	-117.523
2012-12-18 14:58:40	112.86	115.55	9.87048	-115.046	-117.788
2012-12-18 15:08:40	113.12	115.8	9.87742	-115.311	-118.043	2012-12-18 15:08:40
2012-12-18 15:18:40	113.35	116.05	9.88437	-115.545	-118.298
2012-12-18 15:28:40	113.65	116.34	9.89131	-115.851	-118.593
2012-12-18 15:38:40	113.93	116.63	9.89826	-116.137	-118.889
2012-12-18 15:48:40	114.2	116.91	9.9052	-116.412	-119.174
2012-12-18 15:58:40	114.49	117.19	9.91215	-116.707	-119.46
2012-12-18 16:08:40	114.76	117.46	9.91909	-116.983	-119.735	2012-12-18 16:08:40
2012-12-18 16:18:40	115.07	117.71	9.92603	-117.299	-119.99
2012-12-18 16:28:40	115.33	118.04	9.93298	-117.564	-120.326
2012-12-18 16:38:40	115.1	117.8	9.93992	-117.329	-120.082
2012-12-18 16:48:40	115.58	118.3	9.94687	-117.819	-120.591
2012-12-18 16:58:40	115.87	118.58	9.95381	-118.114	-120.877
2012-12-18 17:08:40	116.16	118.84	9.96076	-118.41	-121.142	2012-12-18 17:08:40
2012-12-18 17:18:40	116.43	119.15	9.9677	-118.685	-121.458
2012-12-18 17:28:40	116.72	119.43	9.97465	-118.981	-121.743
2012-12-18 17:38:40	117.01	119.73	9.98159	-119.276	-122.049
2012-12-18 17:48:40	117.31	120.02	9.98853	-119.582	-122.345
2012-12-18 17:58:40	117.62	120.33	9.99548	-119.898	-122.661
2012-12-18 18:08:40	117.87	120.59	10.0024	-120.153	-122.926	2012-12-18 18:08:40
2012-12-18 18:18:40	118.15	120.86	10.0094	-120.438	-123.201
2012-12-18 18:28:40	118.44	121.16	10.0163	-120.734	-123.507
2012-12-18 18:38:40	118.72	121.44	10.0233	-121.019	-123.792
2012-12-18 18:48:40	119.01	121.76	10.0302	-121.315	-124.118
2012-12-18 18:58:40	119.34	122.05	10.0371	-121.651	-124.414
2012-12-18 19:08:40	119.63	122.33	10.0441	-121.947	-124.699	2012-12-18 19:08:40
2012-12-18 19:18:40	119.94	122.64	10.051	-122.263	-125.015
2012-12-18 19:28:40	120.24	122.96	10.058	-122.569	-125.341
2012-12-18 19:38:40	120.53	123.24	10.0649	-122.864	-125.627
2012-12-18 19:48:40	120.84	123.56	10.0719	-123.18	-125.953
2012-12-18 19:58:40	121.14	123.87	10.0788	-123.486	-126.269
2012-12-18 20:08:40	121.44	124.16	10.0858	-123.792	-126.565	2012-12-18 20:08:40
2012-12-18 20:18:40	121.73	124.48	10.0927	-124.088	-126.891
2012-12-18 20:28:40	122.06	124.78	10.0996	-124.424	-127.197
2012-12-18 20:38:40	122.36	125.09	10.1066	-124.73	-127.513
2012-12-18 20:48:40	122.64	125.37	10.1135	-125.015	-127.798
2012-12-18 20:58:40	122.93	125.66	10.1205	-125.311	-128.094
2012-12-18 21:08:40	123.26	125.99	10.1274	-125.647	-128.43	2012-12-18 21:08:40
2012-12-18 21:18:40	123.55	126.31	10.1344	-125.943	-128.756
2012-12-18 21:28:40	123.87	126.6	10.1413	-126.269	-129.052
2012-12-18 21:38:40	124.14	126.9	10.1483	-126.544	-129.358
2012-12-18 21:48:40	124.44	127.19	10.1552	-126.85	-129.653
2012-12-18 21:58:40	124.73	127.51	10.1621	-127.146	-129.98
2012-12-18 22:08:40	125.06	127.83	10.1691	-127.482	-130.306	2012-12-18 22:08:40
2012-12-18 22:18:40	125.36	128.13	10.176	-127.788	-130.612
2012-12-18 22:28:40	125.68	128.44	10.183	-128.114	-130.928
2012-12-18 22:38:40	125.97	128.74	10.1899	-128.41	-131.233
2012-12-18 22:48:40	126.26	129.02	10.1969	-128.705	-131.519
2012-12-18 22:58:40	126.56	129.26	10.2038	-129.011	-131.764
2012-12-18 23:08:40	126.87	129.59	10.2108	-129.327	-132.1	2012-12-18 23:08:40
2012-12-18 23:18:40	127.14	129.9	10.2177	-129.602	-132.416
2012-12-18 23:28:40	127.45	130.19	10.2246	-129.918	-132.712
2012-12-18 23:38:40	127.74	130.53	10.2316	-130.214	-133.058
2012-12-18 23:48:40	128.05	130.84	10.2385	-130.53	-133.374
2012-12-18 23:58:40	128.31	131.11	10.2455	-130.795	-133.649
2012-12-19 00:08:40	128.64	131.44	10.2524	-131.131	-133.986	2012-12-19 00:08:40
2012-12-19 00:18:40	128.94	131.72	10.2594	-131.437	-134.271
2012-12-19 00:28:40	129.21	132.01	10.2663	-131.713	-134.567
2012-12-19 00:38:40	129.46	132.26	10.2733	-131.967	-134.822
2012-12-19 00:48:40	129.77	132.56	10.2802	-132.283	-135.127
2012-12-19 00:58:40	130.09	132.89	10.2871	-132.61	-135.464
2012-12-19 01:08:40	130.37	133.19	10.2941	-132.895	-135.77	2012-12-19 01:08:40
2012-12-19 01:18:40	130.67	133.49	10.301	-133.201	-136.075
2012-12-19 01:28:40	130.96	133.79	10.308	-133.496	-136.381
2012-12-19 01:38:40	131.26	134.08	10.3149	-133.802	-136.677
2012-12-19 01:48:40	131.57	134.35	10.3219	-134.118	-136.952
2012-12-19 01:58:40	131.78	134.68	10.3288	-134.332	-137.288
2012-12-19 02:08:40	132.1	134.98	10.3358	-134.659	-137.594	2012-12-19 02:08:40
2012-12-19 02:18:40	132.41	135.26	10.3427	-134.975	-137.88
2012-12-19 02:28:40	132.72	135.53	10.3496	-135.291	-138.155
2012-12-19 02:38:40	133.01	135.87	10.3566	-135.586	-138.502
2012-12-19 02:48:40	133.3	136.17	10.3635	-135.882	-138.807
2012-12-19 02:58:40	133.6	136.47	10.3705	-136.188	-139.113
2012-12-19 03:08:40	133.9	136.75	10.3774	-136.493	-139.399	2012-12-19 03:08:40
2012-12-19 03:18:40	134.18	137.06	10.3844	-136.779	-139.715
2012-12-19 03:28:40	134.47	137.33	10.3913	-137.074	-139.99
2012-12-19 03:38:40	134.77	137.65	10.3983	-137.38	-140.316
2012-12-19 03:48:40	135.06	137.94	10.4052	-137.676	-140.612
2012-12-19 03:58:40	135.35	138.23	10.4121	-137.971	-140.907
2012-12-19 04:08:40	135.63	138.5	10.4191	-138.257	-141.182	2012-12-19 04:08:40
2012-12-19 04:18:40	135.93	138.81	10.426	-138.563	-141.498
2012-12-19 04:28:40	136.23	139.08	10.433	-138.869	-141.774
2012-12-19 04:38:40	136.5	139.38	10.4399	-139.144	-142.08
2012-12-19 04:48:40	136.75	139.69	10.4469	-139.399	-142.396
2012-12-19 04:58:40	137.06	139.98	10.4538	-139.715	-142.691
2012-12-19 05:08:40	137.38	140.28	10.4608	-140.041	-142.997	2012-12-19 05:08:40
2012-12-19 05:18:40	137.66	140.55	10.4677	-140.326	-143.272
2012-12-19 05:28:40	137.97	140.82	10.4746	-140.642	-143.547
2012-12-19 05:38:40	138.23	141.14	10.4816	-140.907	-143.874
2012-12-19 05:48:40	138.51	141.43	10.4885	-141.193	-144.169
2012-12-19 05:58:40	138.81	141.75	10.4955	-141.498	-144.495
2012-12-19 06:08:40	139.09	142.03	10.5024	-141.784	-144.781	2012-12-19 06:08:40
2012-12-19 06:18:40	139.4	142.28	10.5094	-142.1	-145.036
2012-12-19 06:28:40	139.67	142.61	10.5163	-142.375	-145.372
2012-12-19 06:38:40	139.95	142.88	10.5233	-142.661	-145.647
2012-12-19 06:48:40	140.24	143.18	10.5302	-142.956	-145.953
2012-12-19 06:58:40	140.53	143.44	10.5371	-143.252	-146.218
2012-12-19 07:08:40	140.76	143.71	10.5441	-143.486	-146.493	2012-12-19 07:08:40
2012-12-19 07:18:40	141.02	144.01	10.551	-143.751	-146.799
2012-12-19 07:28:40	141.31	144.32	10.558	-144.047	-147.115
2012-12-19 07:38:40	141.62	144.6	10.5649	-144.363	-147.401
2012-12-19 07:48:40	141.88	144.87	10.5719	-144.628	-147.676
2012-12-19 07:58:40	142.17	145.17	10.5788	-144.924	-147.982
2012-12-19 08:08:40	142.41	145.46	10.5858	-145.168	-148.277	2012-12-19 08:08:40
2012-12-19 08:18:40	142.53	145.53	10.5927	-145.291	-148.349
2012-12-19 08:28:40	142.8	145.86	10.5996	-145.566	-148.685
2012-12-19 08:38:40	143.07	146.13	10.6066	-145.841	-148.96
2012-12-19 08:48:40	143.33	146.39	10.6135	-146.106	-149.225
2012-12-19 08:58:40	143.6	146.63	10.6205	-146.381	-149.47
2012-12-19 09:08:40	143.87	146.92	10.6274	-146.656	-149.766	2012-12-19 09:08:40
2012-12-19 09:18:40	144.14	147.19	10.6344	-146.932	-150.041
2012-12-19 09:28:40	144.4	147.46	10.6413	-147.197	-150.316
2012-12-19 09:38:40	144.67	147.73	10.6483	-147.472	-150.591
2012-12-19 09:48:40	144.91	147.92	10.6552	-147.717	-150.785
2012-12-19 09:58:40	145.19	148.23	10.6621	-148.002	-151.101
2012-12-19 10:08:40	145.45	148.57	10.6691	-148.267	-151.448	2012-12-19 10:08:40
2012-12-19 10:18:40	145.69	148.79	10.676	-148.512	-151.672
2012-12-19 10:28:40	145.92	149.05	10.683	-148.746	-151.937
2012-12-19 10:38:40	146.24	149.32	10.6899	-149.072	-152.212
2012-12-19 10:48:40	146.51	149.62	10.6969	-149.348	-152.518
2012-12-19 10:58:40	146.75	149.87	10.7038	-149.592	-152.773
2012-12-19 11:08:40	147.04	150.16	10.7108	-149.888	-153.068	2012-12-19 11:08:40
2012-12-19 11:18:40	147.31	150.43	10.7177	-150.163	-153.344
2012-12-19 11:28:40	147.57	150.7	10.7246	-150.428	-153.619
2012-12-19 11:38:40	147.83	150.99	10.7316	-150.693	-153.914
2012-12-19 11:48:40	148.09	151.21	10.7385	-150.958	-154.139
2012-12-19 11:58:40	148.36	151.48	10.7455	-151.233	-154.414
2012-12-19 12:08:40	148.62	151.73	10.7524	-151.498	-154.669	2012-12-19 12:08:40
2012-12-19 12:18:40	148.89	152.04	10.7594	-151.774	-154.985
2012-12-19 12:28:40	149.13	152.31	10.7663	-152.018	-155.26
2012-12-19 12:38:40	149.43	152.61	10.7733	-152.324	-155.566
2012-12-19 12:48:40	149.71	152.87	10.7802	-152.61	-155.831
2012-12-19 12:58:40	149.94	153.15	10.7871	-152.844	-156.116
2012-12-19 13:08:40	150.23	153.41	10.7941	-153.14	-156.381	2012-12-19 13:08:40
2012-12-19 13:18:40	150.49	153.68	10.801	-153.405	-156.656
2012-12-19 13:28:40	150.75	153.93	10.808	-153.67	-156.911
2012-12-19 13:38:40	150.98	154.22	10.8149	-153.904	-157.207
2012-12-19 13:48:40	151.26	154.46	10.8219	-154.19	-157.452
2012-12-19 13:58:40	151.52	154.73	10.8288	-154.455	-157.727
2012-12-19 14:08:40	151.77	155	10.8358	-154.709	-158.002	2012-12-19 14:08:40
2012-12-19 14:18:40	152.02	155.26	10.8427	-154.964	-158.267
2012-12-19 14:28:40	152.28	155.52	10.8496	-155.229	-158.532
2012-12-19 14:38:40	152.52	155.77	10.8566	-155.474	-158.787
2012-12-19 14:48:40	152.78	156.02	10.8635	-155.739	-159.042
2012-12-19 14:58:40	153.01	156.27	10.8705	-155.973	-159.297
2012-12-19 15:08:40	153.27	156.52	10.8774	-156.239	-159.551	2012-12-19 15:08:40
2012-12-19 15:18:40	153.5	156.78	10.8844	-156.473	-159.817
2012-12-19 15:28:40	153.76	157.04	10.8913	-156.738	-160.082
2012-12-19 15:38:40	154	157.29	10.8983	-156.983	-160.336
2012-12-19 15:48:40	154.24	157.52	10.9052	-157.227	-160.571
2012-12-19 15:58:40	154.48	157.78	10.9121	-157.472	-160.836
2012-12-19 16:08:40	154.73	158	10.9191	-157.727	-161.06	2012-12-19 16:08:40
2012-12-19 16:18:40	154.96	158.25	10.926	-157.961	-161.315
2012-12-19 16:28:40	155.2	158.51	10.933	-158.206	-161.58
2012-12-19 16:38:40	155.44	158.74	10.9399	-158.451	-161.814
2012-12-19 16:48:40	155.19	158.39	10.9469	-158.196	-161.458
2012-12-19 16:58:40	155.71	159.02	10.9538	-158.726	-162.1
2012-12-19 17:08:40	155.99	159.29	10.9608	-159.011	-162.375	2012-12-19 17:08:40
2012-12-19 17:18:40	156.24	159.53	10.9677	-159.266	-162.62
2012-12-19 17:28:40	156.45	159.78	10.9746	-159.48	-162.875
2012-12-19 17:38:40	156.45	160.03	10.9816	-159.48	-163.129
2012-12-19 17:48:40	156.99	160.25	10.9885	-160.031	-163.354
2012-12-19 17:58:40	157.22	160.53	10.9955	-160.265	-163.639
2012-12-19 18:08:40	157.47	160.78	11.0024	-160.52	-163.894	2012-12-19 18:08:40
2012-12-19 18:18:40	157.7	161.03	11.0094	-160.754	-164.149
2012-12-19 18:28:40	157.96	161.3	11.0163	-161.019	-164.424
2012-12-19 18:38:40	158.2	161.56	11.0233	-161.264	-164.689
2012-12-19 18:48:40	158.42	161.79	11.0302	-161.488	-164.924
2012-12-19 18:58:40	158.67	162.01	11.0371	-161.743	-165.148
2012-12-19 19:08:40	158.93	162.23	11.0441	-162.008	-165.372	2012-12-19 19:08:40
2012-12-19 19:18:40	159.13	162.51	11.051	-162.212	-165.657
2012-12-19 19:28:40	159.38	162.75	11.058	-162.467	-165.902
2012-12-19 19:38:40	159.61	163	11.0649	-162.701	-166.157
2012-12-19 19:48:40	159.83	163.23	11.0719	-162.926	-166.391
2012-12-19 19:58:40	160.07	163.46	11.0788	-163.17	-166.626
2012-12-19 20:08:40	160.25	163.7	11.0858	-163.354	-166.871	2012-12-19 20:08:40
2012-12-19 20:18:40	160.54	163.95	11.0927	-163.649	-167.125
2012-12-19 20:28:40	160.74	164.17	11.0996	-163.853	-167.35
2012-12-19 20:38:40	161.01	164.37	11.1066	-164.128	-167.554
2012-12-19 20:48:40	161.24	164.64	11.1135	-164.363	-167.829
2012-12-19 20:58:40	161.45	164.88	11.1205	-164.577	-168.073
2012-12-19 21:08:40	161.66	165.13	11.1274	-164.791	-168.328	2012-12-19 21:08:40
2012-12-19 21:18:40	161.92	165.32	11.1344	-165.056	-168.522
2012-12-19 21:28:40	162.15	165.61	11.1413	-165.291	-168.818
2012-12-19 21:38:40	162.37	165.86	11.1483	-165.515	-169.072
2012-12-19 21:48:40	162.6	166.09	11.1552	-165.749	-169.307
2012-12-19 21:58:40	162.82	166.32	11.1621	-165.973	-169.541
2012-12-19 22:08:40	163.06	166.54	11.1691	-166.218	-169.766	2012-12-19 22:08:40
2012-12-19 22:18:40	163.27	166.76	11.176	-166.432	-169.99
2012-12-19 22:28:40	163.5	167	11.183	-166.667	-170.234
2012-12-19 22:38:40	163.71	167.23	11.1899	-166.881	-170.469
2012-12-19 22:48:40	163.92	167.48	11.1969	-167.095	-170.724
2012-12-19 22:58:40	164.16	167.68	11.2038	-167.339	-170.928
2012-12-19 23:08:40	164.36	167.9	11.2108	-167.543	-171.152	2012-12-19 23:08:40
2012-12-19 23:18:40	164.57	168.12	11.2177	-167.757	-171.376
2012-12-19 23:28:40	164.76	168.31	11.2246	-167.951	-171.57
2012-12-19 23:38:40	164.93	168.52	11.2316	-168.124	-171.784
2012-12-19 23:48:40	165.15	168.72	11.2385	-168.349	-171.988
2012-12-19 23:58:40	165.33	168.96	11.2455	-168.532	-172.232
2012-12-20 00:08:40	165.55	169.18	11.2524	-168.756	-172.457	2012-12-20 00:08:40
2012-12-20 00:18:40	165.76	169.38	11.2594	-168.97	-172.661
2012-12-20 00:28:40	165.96	169.59	11.2663	-169.174	-172.875
2012-12-20 00:38:40	166.16	169.81	11.2733	-169.378	-173.099
2012-12-20 00:48:40	166.38	170.02	11.2802	-169.602	-173.313
2012-12-20 00:58:40	166.56	170.26	11.2871	-169.786	-173.558
2012-12-20 01:08:40	166.77	170.48	11.2941	-170	-173.782	2012-12-20 01:08:40
2012-12-20 01:18:40	166.99	170.69	11.301	-170.224	-173.996
2012-12-20 01:28:40	167.21	170.9	11.308	-170.449	-174.21
2012-12-20 01:38:40	167.43	171.14	11.3149	-170.673	-174.455
2012-12-20 01:48:40	167.63	171.37	11.3219	-170.877	-174.689
2012-12-20 01:58:40	167.85	171.6	11.3288	-171.101	-174.924
2012-12-20 02:08:40	168.05	171.81	11.3358	-171.305	-175.138	2012-12-20 02:08:40
2012-12-20 02:18:40	168.25	172.03	11.3427	-171.509	-175.362
2012-12-20 02:28:40	168.45	172.24	11.3496	-171.713	-175.576
2012-12-20 02:38:40	168.66	172.45	11.3566	-171.927	-175.79
2012-12-20 02:48:40	168.82	172.65	11.3635	-172.09	-175.994
2012-12-20 02:58:40	169.05	172.85	11.3705	-172.324	-176.198
2012-12-20 03:08:40	169.24	173.07	11.3774	-172.518	-176.422	2012-12-20 03:08:40
2012-12-20 03:18:40	169.43	173.28	11.3844	-172.712	-176.636
2012-12-20 03:28:40	169.62	173.49	11.3913	-172.905	-176.85
2012-12-20 03:38:40	169.82	173.67	11.3983	-173.109	-177.034
2012-12-20 03:48:40	170.03	173.91	11.4052	-173.323	-177.278
2012-12-20 03:58:40	170.22	174.11	11.4121	-173.517	-177.482
2012-12-20 04:08:40	170.42	174.29	11.4191	-173.721	-177.666	2012-12-20 04:08:40
2012-12-20 04:18:40	170.6	174.53	11.426	-173.904	-177.91
2012-12-20 04:28:40	170.8	174.73	11.433	-174.108	-178.114
2012-12-20 04:38:40	171	174.95	11.4399	-174.312	-178.338
2012-12-20 04:48:40	171.12	175.17	11.4469	-174.434	-178.563
2012-12-20 04:58:40	171.4	175.37	11.4538	-174.72	-178.767
2012-12-20 05:08:40	171.56	175.59	11.4608	-174.883	-178.991	2012-12-20 05:08:40
2012-12-20 05:18:40	171.77	175.77	11.4677	-175.097	-179.174
2012-12-20 05:28:40	171.94	175.99	11.4746	-175.27	-179.399
2012-12-20 05:38:40	172.15	176.19	11.4816	-175.484	-179.602
2012-12-20 05:48:40	172.29	176.39	11.4885	-175.627	-179.806
2012-12-20 05:58:40	172.53	176.62	11.4955	-175.872	-180.041
2012-12-20 06:08:40	172.74	176.79	11.5024	-176.086	-180.214	2012-12-20 06:08:40
2012-12-20 06:18:40	172.92	177.01	11.5094	-176.269	-180.438
2012-12-20 06:28:40	173.1	177.24	11.5163	-176.453	-180.673
2012-12-20 06:38:40	173.28	177.44	11.5233	-176.636	-180.877
2012-12-20 06:48:40	173.46	177.64	11.5302	-176.82	-181.081
2012-12-20 06:58:40	173.62	177.84	11.5371	-176.983	-181.284
2012-12-20 07:08:40	173.84	178.03	11.5441	-177.207	-181.478	2012-12-20 07:08:40
2012-12-20 07:18:40	174.02	178.22	11.551	-177.39	-181.672
2012-12-20 07:28:40	174.19	178.44	11.558	-177.564	-181.896
2012-12-20 07:38:40	174.36	178.61	11.5649	-177.737	-182.069
2012-12-20 07:48:40	174.51	178.8	11.5719	-177.89	-182.263
2012-12-20 07:58:40	174.67	178.98	11.5788	-178.053	-182.446
2012-12-20 08:08:40	174.82	179.15	11.5858	-178.206	-182.62	2012-12-20 08:08:40
2012-12-20 08:18:40	174.99	179.34	11.5927	-178.379	-182.813
2012-12-20 08:28:40	173.95	179.05	11.5996	-177.319	-182.518
2012-12-20 08:38:40	175.04	179.62	11.6066	-178.43	-183.099
2012-12-20 08:48:40	175.25	179.88	11.6135	-178.644	-183.364
2012-12-20 08:58:40	175.42	180.09	11.6205	-178.818	-183.578
2012-12-20 09:08:40	175.63	180.31	11.6274	-179.032	-183.802	2012-12-20 09:08:40
2012-12-20 09:18:40	175.82	180.47	11.6344	-179.225	-183.965
2012-12-20 09:28:40	176.01	180.69	11.6413	-179.419	-184.19
2012-12-20 09:38:40	176.18	180.91	11.6483	-179.592	-184.414
2012-12-20 09:48:40	176.39	181.13	11.6552	-179.806	-184.638
2012-12-20 09:58:40	176.6	181.27	11.6621	-180.02	-184.781
2012-12-20 10:08:40	176.78	181.5	11.6691	-180.204	-185.015	2012-12-20 10:08:40
2012-12-20 10:18:40	176.96	181.72	11.676	-180.387	-185.24
2012-12-20 10:28:40	177.13	181.88	11.683	-180.561	-185.403
2012-12-20 10:38:40	177.29	182.03	11.6899	-180.724	-185.556
2012-12-20 10:48:40	177.44	182.19	11.6969	-180.877	-185.719
2012-12-20 10:58:40	177.57	182.34	11.7038	-181.009	-185.872
2012-12-20 11:08:40	177.67	182.52	11.7108	-181.111	-186.055	2012-12-20 11:08:40
2012-12-20 11:18:40	177.85	182.68	11.7177	-181.295	-186.218
2012-12-20 11:28:40	178.01	182.88	11.7246	-181.458	-186.422
2012-12-20 11:38:40	178.02	183.01	11.7316	-181.468	-186.555
2012-12-20 11:48:40	178.28	183.23	11.7385	-181.733	-186.779
2012-12-20 11:58:40	178.41	183.45	11.7455	-181.865	-187.003
2012-12-20 12:08:40	178.19	183.34	11.7524	-181.641	-186.891	2012-12-20 12:08:40
2012-12-20 12:18:40	178.6	183.75	11.7594	-182.059	-187.309
2012-12-20 12:28:40	178.8	184.07	11.7663	-182.263	-187.635
2012-12-20 12:38:40	178.97	184.29	11.7733	-182.436	-187.859
2012-12-20 12:48:40	179.17	184.53	11.7802	-182.64	-188.104
2012-12-20 12:58:40	179.4	184.8	11.7871	-182.875	-188.379
2012-12-20 13:08:40	179.61	185.04	11.7941	-183.089	-188.624	2012-12-20 13:08:40
2012-12-20 13:18:40	179.79	185.3	11.801	-183.272	-188.889
2012-12-20 13:28:40	180.04	185.5	11.808	-183.527	-189.093
2012-12-20 13:38:40	180.25	185.77	11.8149	-183.741	-189.368
2012-12-20 13:48:40	180.47	185.98	11.8219	-183.965	-189.582
2012-12-20 13:58:40	180.69	186.22	11.8288	-184.19	-189.827
2012-12-20 14:08:40	180.89	186.48	11.8358	-184.393	-190.092	2012-12-20 14:08:40
2012-12-20 14:18:40	181.09	186.71	11.8427	-184.597	-190.326
2012-12-20 14:28:40	181.29	186.92	11.8496	-184.801	-190.54
2012-12-20 14:38:40	181.5	187.15	11.8566	-185.015	-190.775
2012-12-20 14:48:40	181.66	187.37	11.8635	-185.178	-190.999
2012-12-20 14:58:40	181.87	187.59	11.8705	-185.392	-191.223
2012-12-20 15:08:40	182.06	187.82	11.8774	-185.586	-191.458	2012-12-20 15:08:40
2012-12-20 15:18:40	182.26	188.03	11.8844	-185.79	-191.672
2012-12-20 15:28:40	182.42	188.25	11.8913	-185.953	-191.896
2012-12-20 15:38:40	182.65	188.48	11.8983	-186.188	-192.13
2012-12-20 15:48:40	182.83	188.68	11.9052	-186.371	-192.334
2012-12-20 15:58:40	183.01	188.86	11.9121	-186.555	-192.518
2012-12-20 16:08:40	183.2	189.13	11.9191	-186.748	-192.793	2012-12-20 16:08:40
2012-12-20 16:18:40	183.35	189.3	11.926	-186.901	-192.966
2012-12-20 16:28:40	183.54	189.56	11.933	-187.095	-193.231
2012-12-20 16:38:40	183.73	189.75	11.9399	-187.288	-193.425
2012-12-20 16:48:40	183.86	190	11.9469	-187.421	-193.68
2012-12-20 16:58:40	184.1	190.16	11.9538	-187.666	-193.843
2012-12-20 17:08:40	184.29	190.36	11.9608	-187.859	-194.047	2012-12-20 17:08:40
2012-12-20 17:18:40	184.44	190.57	11.9677	-188.012	-194.261
2012-12-20 17:28:40	184.06	190.67	11.9746	-187.625	-194.363
2012-12-20 17:38:40	184.8	191	11.9816	-188.379	-194.699
2012-12-20 17:48:40	185	191.2	11.9885	-188.583	-194.903
2012-12-20 17:58:40	185.14	191.39	11.9955	-188.726	-195.097
2012-12-20 18:08:40	185.35	191.61	12.0024	-188.94	-195.321	2012-12-20 18:08:40
2012-12-20 18:18:40	185.54	191.83	12.0094	-189.134	-195.545
2012-12-20 18:28:40	185.71	192.01	12.0163	-189.307	-195.729
2012-12-20 18:38:40	185.88	192.23	12.0233	-189.48	-195.953
2012-12-20 18:48:40	186.07	192.41	12.0302	-189.674	-196.137
2012-12-20 18:58:40	186.21	192.59	12.0371	-189.817	-196.32
2012-12-20 19:08:40	186.39	192.78	12.0441	-190	-196.514	2012-12-20 19:08:40
2012-12-20 19:18:40	186.57	192.97	12.051	-190.183	-196.707
2012-12-20 19:28:40	186.73	193.21	12.058	-190.347	-196.952
2012-12-20 19:38:40	186.9	193.35	12.0649	-190.52	-197.095
2012-12-20 19:48:40	187.08	193.57	12.0719	-190.703	-197.319
2012-12-20 19:58:40	187.24	193.81	12.0788	-190.866	-197.564
2012-12-20 20:08:40	187.42	194.02	12.0858	-191.05	-197.778	2012-12-20 20:08:40
2012-12-20 20:18:40	187.54	194.21	12.0927	-191.172	-197.971
2012-12-20 20:28:40	187.73	194.39	12.0996	-191.366	-198.155
2012-12-20 20:38:40	187.91	194.64	12.1066	-191.549	-198.41
2012-12-20 20:48:40	188.06	194.83	12.1135	-191.702	-198.603
2012-12-20 20:58:40	188.25	195.04	12.1205	-191.896	-198.818
2012-12-20 21:08:40	188.39	195.21	12.1274	-192.039	-198.991	2012-12-20 21:08:40
2012-12-20 21:18:40	188.58	195.41	12.1344	-192.232	-199.195
2012-12-20 21:28:40	188.74	195.61	12.1413	-192.396	-199.399
2012-12-20 21:38:40	188.91	195.82	12.1483	-192.569	-199.613
2012-12-20 21:48:40	189.06	196.01	12.1552	-192.722	-199.806
2012-12-20 21:58:40	189.22	196.18	12.1621	-192.885	-199.98
2012-12-20 22:08:40	189.36	196.4	12.1691	-193.028	-200.204	2012-12-20 22:08:40
2012-12-20 22:18:40	189.52	196.58	12.176	-193.191	-200.387
2012-12-20 22:28:40	189.67	196.79	12.183	-193.344	-200.601
2012-12-20 22:38:40	189.83	197.01	12.1899	-193.507	-200.826
2012-12-20 22:48:40	189.95	197.18	12.1969	-193.629	-200.999
2012-12-20 22:58:40	190.14	197.42	12.2038	-193.823	-201.244
2012-12-20 23:08:40	190.28	197.61	12.2108	-193.965	-201.437	2012-12-20 23:08:40
2012-12-20 23:18:40	190.45	197.78	12.2177	-194.139	-201.611
2012-12-20 23:28:40	190.61	198.01	12.2246	-194.302	-201.845
2012-12-20 23:38:40	190.77	198.24	12.2316	-194.465	-202.08
2012-12-20 23:48:40	190.92	198.44	12.2385	-194.618	-202.283
2012-12-20 23:58:40	191.09	198.6	12.2455	-194.791	-202.446
2012-12-21 00:08:40	191.22	198.78	12.2524	-194.924	-202.63	2012-12-21 00:08:40
2012-12-21 00:18:40	191.42	198.96	12.2594	-195.127	-202.813
2012-12-21 00:28:40	191.54	199.23	12.2663	-195.25	-203.089
2012-12-21 00:38:40	191.7	199.42	12.2733	-195.413	-203.282
2012-12-21 00:48:40	191.86	199.62	12.2802	-195.576	-203.486
2012-12-21 00:58:40	192.02	199.81	12.2871	-195.739	-203.68
2012-12-21 01:08:40	192.13	200	12.2941	-195.851	-203.874	2012-12-21 01:08:40
2012-12-21 01:18:40	192.32	200.22	12.301	-196.045	-204.098
2012-12-21 01:28:40	192.42	200.42	12.308	-196.147	-204.302
2012-12-21 01:38:40	192.62	200.65	12.3149	-196.351	-204.536
2012-12-21 01:48:40	192.74	200.85	12.3219	-196.473	-204.74
2012-12-21 01:58:40	192.86	201.05	12.3288	-196.595	-204.944
2012-12-21 02:08:40	192.99	201.25	12.3358	-196.728	-205.148	2012-12-21 02:08:40
2012-12-21 02:18:40	193.19	201.44	12.3427	-196.932	-205.341
2012-12-21 02:28:40	193.34	201.65	12.3496	-197.085	-205.556
2012-12-21 02:38:40	193.52	201.84	12.3566	-197.268	-205.749
2012-12-21 02:48:40	193.66	202.03	12.3635	-197.411	-205.943
2012-12-21 02:58:40	193.81	202.28	12.3705	-197.564	-206.198
2012-12-21 03:08:40	193.96	202.47	12.3774	-197.717	-206.391	2012-12-21 03:08:40
2012-12-21 03:18:40	194.12	202.7	12.3844	-197.88	-206.626
2012-12-21 03:28:40	194.28	202.88	12.3913	-198.043	-206.809
2012-12-21 03:38:40	194.41	203.08	12.3983	-198.175	-207.013
2012-12-21 03:48:40	194.57	203.28	12.4052	-198.338	-207.217
2012-12-21 03:58:40	194.69	203.48	12.4121	-198.461	-207.421
2012-12-21 04:08:40	194.86	203.7	12.4191	-198.634	-207.645	2012-12-21 04:08:40
2012-12-21 04:18:40	195.01	203.91	12.426	-198.787	-207.859
2012-12-21 04:28:40	195.19	204.09	12.433	-198.97	-208.043
2012-12-21 04:38:40	195.33	204.28	12.4399	-199.113	-208.236
2012-12-21 04:48:40	195.47	204.53	12.4469	-199.256	-208.491
2012-12-21 04:58:40	195.63	204.76	12.4538	-199.419	-208.726
2012-12-21 05:08:40	195.78	204.95	12.4608	-199.572	-208.919	2012-12-21 05:08:40
2012-12-21 05:18:40	195.92	205.11	12.4677	-199.715	-209.083
2012-12-21 05:28:40	196.1	205.35	12.4746	-199.898	-209.327
2012-12-21 05:38:40	196.23	205.54	12.4816	-200.031	-209.521
2012-12-21 05:48:40	196.39	205.76	12.4885	-200.194	-209.745
2012-12-21 05:58:40	196.55	205.99	12.4955	-200.357	-209.98
2012-12-21 06:08:40	196.69	206.2	12.5024	-200.499	-210.194	2012-12-21 06:08:40
2012-12-21 06:18:40	196.86	206.39	12.5094	-200.673	-210.387
2012-12-21 06:28:40	196.98	206.62	12.5163	-200.795	-210.622
2012-12-21 06:38:40	197.14	206.84	12.5233	-200.958	-210.846
2012-12-21 06:48:40	197.28	207.04	12.5302	-201.101	-211.05
2012-12-21 06:58:40	197.44	207.26	12.5371	-201.264	-211.274
2012-12-21 07:08:40	197.58	207.45	12.5441	-201.407	-211.468	2012-12-21 07:08:40
2012-12-21 07:18:40	197.72	207.68	12.551	-201.549	-211.702
2012-12-21 07:28:40	197.87	207.86	12.558	-201.702	-211.886
2012-12-21 07:38:40	198.02	208.1	12.5649	-201.855	-212.13
2012-12-21 07:48:40	198.16	208.33	12.5719	-201.998	-212.365
2012-12-21 07:58:40	198.31	208.46	12.5788	-202.151	-212.497
2012-12-21 08:08:40	198.45	208.6	12.5858	-202.294	-212.64	2012-12-21 08:08:40
2012-12-21 08:18:40	196.11	206.76	12.5927	-199.908	-210.765
2012-12-21 08:28:40	198.96	208.74	12.5996	-202.813	-212.783
2012-12-21 08:38:40	199.15	208.95	12.6066	-203.007	-212.997
2012-12-21 08:48:40	199.28	209.16	12.6135	-203.14	-213.211
2012-12-21 08:58:40	199.38	209.41	12.6205	-203.242	-213.466
2012-12-21 09:08:40	199.56	209.58	12.6274	-203.425	-213.639	2012-12-21 09:08:40
2012-12-21 09:18:40	199.73	209.81	12.6344	-203.598	-213.874
2012-12-21 09:28:40	199.88	209.87	12.6413	-203.751	-213.935
2012-12-21 09:38:40	200.03	210.25	12.6483	-203.904	-214.322
2012-12-21 09:48:40	200.18	210.48	12.6552	-204.057	-214.557
2012-12-21 09:58:40	200.35	210.68	12.6621	-204.23	-214.76
2012-12-21 10:08:40	200.47	210.84	12.6691	-204.353	-214.924	2012-12-21 10:08:40
2012-12-21 10:18:40	200.64	211.08	12.676	-204.526	-215.168
2012-12-21 10:28:40	200.77	211.27	12.683	-204.659	-215.362
2012-12-21 10:38:40	200.94	211.48	12.6899	-204.832	-215.576
2012-12-21 10:48:40	201.06	211.69	12.6969	-204.954	-215.79
2012-12-21 10:58:40	201.22	211.91	12.7038	-205.117	-216.014
2012-12-21 11:08:40	201.29	212.12	12.7108	-205.189	-216.228	2012-12-21 11:08:40
2012-12-21 11:18:40	201.5	212.33	12.7177	-205.403	-216.442
2012-12-21 11:28:40	201.68	212.55	12.7246	-205.586	-216.667
2012-12-21 11:38:40	201.74	212.76	12.7316	-205.647	-216.881
2012-12-21 11:48:40	201.93	212.97	12.7385	-205.841	-217.095
2012-12-21 11:58:40	202.07	213.19	12.7455	-205.984	-217.319
2012-12-21 12:08:40	202.22	213.41	12.7524	-206.137	-217.543	2012-12-21 12:08:40
2012-12-21 12:18:40	202.36	213.62	12.7594	-206.279	-217.757
2012-12-21 12:28:40	202.5	213.74	12.7663	-206.422	-217.88
2012-12-21 12:38:40	202.6	214.02	12.7733	-206.524	-218.165
2012-12-21 12:48:40	202.78	214.26	12.7802	-206.707	-218.41
2012-12-21 12:58:40	202.94	214.42	12.7871	-206.871	-218.573
2012-12-21 13:08:40	203.08	214.69	12.7941	-207.013	-218.848	2012-12-21 13:08:40
2012-12-21 13:18:40	203.21	214.89	12.801	-207.146	-219.052
2012-12-21 13:28:40	203.35	215.09	12.808	-207.288	-219.256
2012-12-21 13:38:40	203.52	215.29	12.8149	-207.462	-219.46
2012-12-21 13:48:40	203.67	215.46	12.8219	-207.615	-219.633
2012-12-21 13:58:40	203.81	215.73	12.8288	-207.757	-219.908
2012-12-21 14:08:40	203.93	215.94	12.8358	-207.88	-220.122	2012-12-21 14:08:40
2012-12-21 14:18:40	204.07	216.16	12.8427	-208.022	-220.347
2012-12-21 14:28:40	204.23	216.35	12.8496	-208.186	-220.54
2012-12-21 14:38:40	204.4	216.51	12.8566	-208.359	-220.703
2012-12-21 14:48:40	204.53	216.82	12.8635	-208.491	-221.019
2012-12-21 14:58:40	204.68	217.02	12.8705	-208.644	-221.223
2012-12-21 15:08:40	204.8	217.23	12.8774	-208.767	-221.437	2012-12-21 15:08:40
2012-12-21 15:18:40	204.96	217.49	12.8844	-208.93	-221.702
2012-12-21 15:28:40	205.14	217.71	12.8913	-209.113	-221.927
2012-12-21 15:38:40	205.27	217.92	12.8983	-209.246	-222.141
2012-12-21 15:48:40	205.4	218.14	12.9052	-209.378	-222.365
2012-12-21 15:58:40	205.57	218.28	12.9121	-209.551	-222.508
2012-12-21 16:08:40	205.73	218.53	12.9191	-209.715	-222.762	2012-12-21 16:08:40
2012-12-21 16:18:40	205.86	218.78	12.926	-209.847	-223.017
2012-12-21 16:28:40	206	219.04	12.933	-209.99	-223.282
2012-12-21 16:38:40	206.18	219.28	12.9399	-210.173	-223.527
2012-12-21 16:48:40	206.32	219.47	12.9469	-210.316	-223.721
2012-12-21 16:58:40	206.46	219.61	12.9538	-210.459	-223.863
2012-12-21 17:08:40	206.57	219.94	12.9608	-210.571	-224.2	2012-12-21 17:08:40
2012-12-21 17:18:40	206.68	220.16	12.9677	-210.683	-224.424
2012-12-21 17:28:40	206.86	220.35	12.9746	-210.866	-224.618
2012-12-21 17:38:40	207.04	220.58	12.9816	-211.05	-224.852
2012-12-21 17:48:40	207.19	220.83	12.9885	-211.203	-225.107
2012-12-21 17:58:40	207.33	221.04	12.9955	-211.346	-225.321
2012-12-21 18:08:40	207.47	221.25	13.0024	-211.488	-225.535	2012-12-21 18:08:40
2012-12-21 18:18:40	207.64	221.46	13.0094	-211.662	-225.749
2012-12-21 18:38:40	207.76	221.75	13.0233	-211.784	-226.045
2012-12-21 18:48:40	207.97	222.02	13.0302	-211.998	-226.32
2012-12-21 18:58:40	208.17	222.32	13.0371	-212.202	-226.626
2012-12-21 19:08:40	208.3	222.56	13.0441	-212.334	-226.871
2012-12-21 19:18:40	208.53	222.8	13.051	-212.569	-227.115	2012-12-21 19:18:40
2012-12-21 19:28:40	208.71	223.04	13.058	-212.752	-227.36
2012-12-21 19:38:40	208.88	223.31	13.0649	-212.926	-227.635
2012-12-21 19:48:40	209.01	223.5	13.0719	-213.058	-227.829
2012-12-21 19:58:40	209.16	223.75	13.0788	-213.211	-228.084
2012-12-21 20:08:40	209.38	223.99	13.0858	-213.435	-228.328
2012-12-21 20:18:40	209.53	224.26	13.0927	-213.588	-228.603	2012-12-21 20:18:40
2012-12-21 20:28:40	209.71	224.41	13.0996	-213.772	-228.756
2012-12-21 20:38:40	209.85	224.69	13.1066	-213.914	-229.042
2012-12-21 20:48:40	209.98	224.9	13.1135	-214.047	-229.256
2012-12-21 20:58:40	210.11	225.15	13.1205	-214.179	-229.511
[truncated: 1,391 more rows]

## Sheet: Tensi
Zeit [d]	MP bot(2) [cm]	MP top(1) [cm]		air entry bot		AE time	AE [cm]	Type	Pos	Weight
0.00413231	-2.92559	-5.38226		nan	8800	#VALUE!	-8970.44	1	2	1
0.045799	-3.01733	-5.49439
0.0874656	-3.08869	-5.57594		air entry top
0.129132	-3.70031	-6.17737		Time				Type	Pos	Weight
0.170799	-4.5158	-7.01325		2012-12-28 01:18:40	8800	19.301	-8970.44	1	1	1
0.212466	-4.17941	-6.80938
0.254132	-4.77064	-7.28848
0.295799	-5.85117	-8.3792
0.337466	-6.64628	-9.17431
0.379132	-7.62487	-10.1631
0.420799	-8.5525	-11.0907
0.462466	-9.37819	-11.9062
0.504132	-10.1325	-12.6504
0.545799	-10.9276	-13.4557
0.587466	-11.682	-14.2406
0.629132	-12.3547	-14.8726
0.670799	-13.1091	-15.6167
0.712466	-13.7615	-16.2691
0.754132	-13.6697	-16.157
0.795799	-14.4139	-16.9419
0.837466	-14.7604	-17.2987
0.879132	-15.1784	-17.7166
0.920799	-15.6269	-18.1549
0.962466	-15.7492	-18.2671
1.00413	-16.0652	-18.6035
1.0458	-16.7584	-19.2457
1.08747	-17.1967	-19.735
1.12913	-17.737	-20.265
1.1708	-18.1346	-20.6626
1.21247	-18.5321	-21.0703
1.25413	-18.7462	-21.2844
1.2958	-19.2355	-21.7737
1.33747	-19.5107	-22.0489
1.37913	-19.8675	-22.3955
1.4208	-20.0612	-22.5892
1.46247	-20.2446	-22.7931
1.50413	-20.5199	-23.0275
1.5458	-20.7645	-23.2926
1.58747	-21.0601	-23.5882
1.62913	-21.213	-23.7513
1.6708	-21.3558	-23.8838
1.71247	-21.5698	-24.1081
1.75413	-21.6922	-24.2202
1.79409	-21.7839	-24.3017
1.79826	-21.7839	-24.3017
1.80242	-21.8247	-24.3527
1.80659	-21.8247	-24.3425
1.81076	-21.8451	-24.3833
1.81492	-21.8858	-24.4139
1.81909	-21.9062	-24.4139
1.82326	-21.8858	-24.3833
1.82742	-21.947	-24.4241
1.83159	-21.9164	-24.4343
1.83576	-21.9674	-24.475
1.87742	-22.1916	-24.7197
1.91909	-22.3344	-24.842
1.96076	-22.5076	-25.0153
2.00242	-22.6402	-25.1478
2.04409	-22.946	-25.4332
2.08576	-23.0887	-25.5861
2.12742	-23.262	-25.7696
2.16909	-23.4353	-25.9123
2.21076	-23.5882	-26.0652
2.25242	-23.7819	-26.3099
2.29409	-23.8736	-26.371
2.33576	-24.1284	-26.6361
2.37742	-24.2202	-26.6972
2.41909	-24.4037	-26.9113
2.46076	-24.6279	-27.1356
2.50242	-24.7095	-27.1764
2.54409	-24.8624	-27.3904
2.58576	-25.0459	-27.5331
2.62742	-25.1988	-27.6962
2.66909	-25.3721	-27.8899
2.71076	-25.4944	-28.002
2.75242	-25.474	-27.9715
2.79409	-25.7288	-28.2263
2.83576	-25.9123	-28.3588
2.87742	-25.9939	-28.4913
2.91909	-26.208	-28.6952
2.96076	-25.5046	-28.002
3.00242	-26.2793	-28.7768
3.04409	-26.473	-28.9704
3.08576	-26.7074	-29.2049
3.12742	-26.9215	-29.419
3.16909	-27.105	-29.5923
3.21076	-27.2273	-29.7248
3.25242	-27.3904	-29.8777
3.29409	-27.6045	-30.0917
3.33576	-27.8084	-30.3058
3.37742	-27.9715	-30.4587
3.41909	-28.0938	-30.581
3.46076	-28.2059	-30.7034
3.50242	-28.4302	-30.9174
3.54409	-28.6239	-31.1213
3.58576	-28.7666	-31.264
3.62742	-28.9297	-31.4271
3.66909	-29.103	-31.5698
3.71076	-29.2661	-31.7329
3.75242	-29.4495	-31.9266
3.79409	-29.6126	-32.0897
3.83576	-29.7655	-32.1916
3.87742	-29.9388	-32.4057
3.91909	-30.1019	-32.5484
3.96076	-30.2854	-32.7013
4.00242	-30.2956	-32.7829
4.04409	-30.5403	-33.0275
4.08576	-30.7339	-33.1702
4.12742	-30.9072	-33.3741
4.16909	-31.0703	-33.5678
4.21076	-31.2334	-33.7207
4.25242	-31.4169	-33.9042
4.29409	-31.6106	-34.1081
4.33576	-31.7737	-34.261
4.37742	-31.947	-34.4241
4.41909	-32.1203	-34.5668
4.46076	-32.2936	-34.7808
4.50242	-32.528	-35.0255
4.54409	-32.7217	-35.209
4.58576	-32.9358	-35.3823
4.62742	-33.1295	-35.6269
4.66909	-33.2212	-35.7187
4.71076	-33.4964	-35.9939
4.75242	-33.7003	-36.208
4.79409	-33.7717	-36.2895
4.83576	-34.0877	-36.5443
4.87742	-34.2915	-36.789
4.91909	-34.526	-37.0336
4.96076	-34.8216	-37.3191
5.00242	-35.107	-37.5841
5.04409	-35.3415	-37.8287
5.08576	-35.6575	-38.0938
5.12742	-35.9327	-38.4302
5.16909	-36.1366	-38.6239
5.21076	-36.4628	-38.9501
5.25242	-36.7584	-39.2559
5.29409	-37.0336	-39.4699
5.33576	-37.2783	-39.7655
5.37742	-37.5535	-40.0408
5.41909	-37.8287	-40.3364
5.46076	-38.1346	-40.632
5.50242	-38.4098	-40.8563
5.54409	-38.6646	-41.1519
5.58576	-38.8787	-41.3863
5.62742	-39.103	-41.5902
5.66909	-39.2966	-41.7737
5.71076	-39.5821	-42.0795
5.75242	-39.8777	-42.3547
5.79409	-40.1223	-42.6198
5.83576	-40.4179	-42.9052
5.87742	-40.7441	-43.1906
5.91909	-41.0296	-43.5168
5.96076	-41.3456	-43.8328
6.00242	-41.6922	-44.159
6.04409	-41.7839	-44.2915
6.08576	-42.263	-44.7604
6.12742	-42.6402	-45.1274
6.16909	-43.0071	-45.5148
6.21076	-43.3945	-45.8818
6.25242	-43.7105	-46.208
6.29409	-44.0469	-46.5545
6.33576	-44.4343	-46.9317
6.37742	-44.8012	-47.2987
6.41909	-45.1478	-47.6656
6.46076	-45.5046	-48.002
6.50242	-45.8512	-48.3588
6.54409	-46.2691	-48.7258
6.58576	-46.5953	-49.103
6.62742	-46.9113	-49.4292
6.66909	-47.3191	-49.8267
6.71076	-47.686	-50.1937
6.75242	-47.9511	-50.4689
6.79409	-48.3282	-50.8563
6.83576	-48.736	-51.2538
6.87742	-49.1233	-51.631
6.91909	-49.5311	-52.0183
6.96076	-49.949	-52.4669
7.00242	-50.3772	-52.8746
7.04409	-50.8257	-53.3333
7.08576	-51.2946	-53.8124
7.12742	-51.7941	-54.3119
7.16909	-52.2732	-54.791
7.21076	-52.7727	-55.2905
7.25242	-53.2926	-55.7594
7.29409	-53.792	-56.3099
7.33576	-54.3017	-56.8196
7.37742	-54.8624	-57.3802
7.41909	-55.4332	-57.9001
7.46076	-55.9939	-58.5117
7.50242	-56.5647	-59.0724
7.54409	-57.156	-59.684
7.58576	-57.7574	-60.2854
7.62742	-58.3588	-60.8359
7.66909	-58.9399	-61.4781
7.71076	-59.5515	-62.0795
7.75242	-60.1937	-62.7319
7.79409	-60.8155	-63.3435
7.83576	-61.4985	-64.0265
7.87742	-62.1305	-64.6483
7.91909	-62.8033	-65.3211
7.96076	-63.5168	-66.0449
8.00242	-64.2508	-66.7584
8.04409	-65.0153	-67.5535
8.08576	-65.8308	-68.3588
8.12742	-66.6361	-69.1641
8.16909	-67.5025	-70.0408
8.21076	-68.369	-70.8563
8.25242	-69.2457	-71.7635
8.29409	-70.0815	-72.6096
8.33576	-70.9582	-73.4964
8.37742	-71.8756	-74.3629
8.41909	-72.8135	-75.3517
8.46076	-73.7207	-76.2589
8.50242	-74.5566	-77.1254
8.54409	-75.5352	-78.0632
8.58576	-76.524	-79.0928
8.62742	-76.9215	-79.4801
8.66909	-78.2365	-80.7951
8.71076	-79.2762	-81.8654
8.75242	-80.4485	-83.0275
8.79409	-81.5698	-84.1488
8.83576	-82.6707	-85.2701
8.87742	-83.6901	-86.2895
8.91909	-84.791	-87.3904
8.96076	-85.9021	-88.4913
9.00242	-87.0234	-89.5719
9.04409	-88.1549	-90.7441
9.08576	-89.3374	-91.947
9.12742	-90.5607	-93.1702
9.16909	-91.6718	-94.3221
9.21076	-92.9256	-95.5556
9.25242	-94.1896	-96.8298
9.29409	-95.474	-98.104
9.33576	-96.7482	-99.3986
9.37742	-98.0938	-100.754
9.41909	-99.4495	-102.069
9.46076	-100.826	-103.486
9.50242	-102.202	-104.883
9.54409	-103.578	-106.269
9.58576	-104.913	-107.604
9.62742	-106.106	-108.777
9.66909	-107.584	-110.275
9.71076	-109.093	-111.733
9.75242	-110.571	-113.262
9.79409	-112.181	-114.873
9.83576	-113.721	-116.453
9.87742	-115.311	-118.043
9.91909	-116.983	-119.735
9.96076	-118.41	-121.142
10.0024	-120.153	-122.926
10.0441	-121.947	-124.699
10.0858	-123.792	-126.565
10.1274	-125.647	-128.43
10.1691	-127.482	-130.306
10.2108	-129.327	-132.1
10.2524	-131.131	-133.986
10.2941	-132.895	-135.77
10.3358	-134.659	-137.594
10.3774	-136.493	-139.399
10.4191	-138.257	-141.182
10.4608	-140.041	-142.997
10.5024	-141.784	-144.781
10.5441	-143.486	-146.493
10.5858	-145.168	-148.277
10.6274	-146.656	-149.766
10.6691	-148.267	-151.448
10.7108	-149.888	-153.068
10.7524	-151.498	-154.669
10.7941	-153.14	-156.381
10.8358	-154.709	-158.002
10.8774	-156.239	-159.551
10.9191	-157.727	-161.06
10.9608	-159.011	-162.375
11.0024	-160.52	-163.894
11.0441	-162.008	-165.372
11.0858	-163.354	-166.871
11.1274	-164.791	-168.328
11.1691	-166.218	-169.766
11.2108	-167.543	-171.152
11.2524	-168.756	-172.457
11.2941	-170	-173.782
11.3358	-171.305	-175.138
11.3774	-172.518	-176.422
11.4191	-173.721	-177.666
11.4608	-174.883	-178.991
11.5024	-176.086	-180.214
11.5441	-177.207	-181.478
11.5858	-178.206	-182.62
11.6274	-179.032	-183.802
11.6691	-180.204	-185.015
11.7108	-181.111	-186.055
11.7524	-181.641	-186.891
11.7941	-183.089	-188.624
11.8358	-184.393	-190.092
11.8774	-185.586	-191.458
11.9191	-186.748	-192.793
11.9608	-187.859	-194.047
12.0024	-188.94	-195.321
12.0441	-190	-196.514
12.0858	-191.05	-197.778
12.1274	-192.039	-198.991
12.1691	-193.028	-200.204
12.2108	-193.965	-201.437
12.2524	-194.924	-202.63
12.2941	-195.851	-203.874
12.3358	-196.728	-205.148
12.3774	-197.717	-206.391
12.4191	-198.634	-207.645
12.4608	-199.572	-208.919
12.5024	-200.499	-210.194
12.5441	-201.407	-211.468
12.5858	-202.294	-212.64
12.6274	-203.425	-213.639
12.6691	-204.353	-214.924
12.7108	-205.189	-216.228
12.7524	-206.137	-217.543
12.7941	-207.013	-218.848
12.8358	-207.88	-220.122
12.8774	-208.767	-221.437
12.9191	-209.715	-222.762
12.9608	-210.571	-224.2
13.0024	-211.488	-225.535
13.051	-212.569	-227.115
13.0927	-213.588	-228.603
13.1344	-214.516	-229.98
13.176	-215.484	-231.366
13.2177	-216.432	-232.752
13.2594	-217.441	-234.261
13.301	-218.379	-235.678
13.3427	-219.388	-237.054
13.3844	-220.418	-238.552
13.426	-221.417	-240.061
13.4677	-222.467	-241.509
13.5094	-223.466	-243.048
13.551	-224.536	-244.577
13.5927	-225.586	-246.137
13.6344	-226.575	-247.635
13.683	-227.849	-249.307
13.7246	-228.991	-251.091
13.7663	-230.02	-252.885
13.808	-231.05	-254.587
13.8496	-232.161	-256.34
13.8913	-233.242	-258.145
13.933	-234.19	-259.969
13.9746	-235.576	-261.835
14.0163	-236.779	-263.802
14.058	-237.207	-263.792
14.0996	-239.399	-267.747
14.1413	-240.815	-269.908
14.183	-242.141	-272.11
14.2246	-243.405	-274.322
14.2663	-244.648	-276.667
14.308	-245.933	-278.97
14.3496	-247.319	-281.274
14.3913	-248.767	-283.976
14.433	-250.214	-286.544
14.4746	-251.641	-289.174
14.5163	-253.262	-291.743
14.558	-254.76	-294.862
14.5996	-244.057	-293.221
14.6483	-258.838	-300.306
14.6899	-261.111	-304.373
14.7316	-263.109	-307.982
14.7733	-264.893	-311.458
14.8149	-266.748	-315.25
14.8566	-268.338	-318.41
14.8983	-270.153	-322.222
14.9399	-272.171	-326.045
14.9816	-274.261	-330.204
15.0233	-276.34	-334.23
15.0649	-278.298	-338.328
15.1066	-280.387	-342.65
15.1483	-282.548	-346.677
15.1899	-284.954	-351.774
15.2316	-287.217	-356.453
15.2733	-289.918	-361.835
15.3149	-291.845	-366.707
15.3566	-295.097	-372.1
15.3983	-298.094	-377.227
15.4399	-301.142	-383.078
15.4816	-303.772	-389.042
15.5233	-306.84	-394.944
15.5649	-309.98	-401.07
15.6066	-313.252	-407.543
15.6483	-316.779	-413.588
15.6899	-320.479	-420.183
15.7316	-324.22	-426.718
15.7733	-327.931	-434.903
15.8149	-332.324	-441.998
15.8566	-336.86	-449.674
15.8983	-341.397	-457.125
15.9399	-345.923	-464.709
15.9816	-350.499	-473.252
16.0233	-355.362	-480.917
16.0649	-360.357	-490.173
16.1066	-365.494	-500.133
16.1483	-371.193	-510.673
16.1899	-376.779	-521.182
16.2316	-382.457	-531.753
16.2733	-388.634	-542.885
16.3149	-394.822	-554.567
16.3566	-401.284	-567.136
16.3983	-407.982	-580.153
16.4399	-414.995	-593.965
16.4816	-422.722	-608.593
16.5233	-430.336	-624.006
16.5649	-438.512	-639.99
16.6066	-447.156	-655.586
16.6483	-456.412	-675.81
16.6899	-465.352	-694.577
16.7316	-474.903	-713.925
16.7733	-497.431	-728.308
16.8149	-510.143	-748.726
16.8566	-521.804	-767.38
16.8983	-532.192	-789.878
16.9399	-544.699	-815.392
16.9816	-558.206	-842.467
17.0233	-572.08	-868.756
17.0649	-585.933	-896.983
17.1066	-599.867	-925.668
17.1483	-614.322	-954.618
17.1899	-629.083	-988.135
17.2316	-643.69	-1023.61
17.2733	-658.919	-1055.6
17.3149	-673.986	-1092.23
17.3566	-690.663	-1130.59
17.3983	-710.357	-1171.56
17.4399	-729.47	-1214.78
17.4816	-747.615	-1259.56
17.5233	-766.29	-1305.88
17.5649	-784.669	-1356.02
17.6066	-806.096	-1410.42
17.6274	-819.134	-1440.47
17.6483	-831.111
17.6899	-854.577
17.7316	-877.676
17.7524	-888.257

## Sheet: HYDRUS
Data für die Zielfunktion: 2 x Tensionen, 1 x Endwassergehalt					Verdunstungsrate
Time	Obs	Type	Pos	Weight	Zeitintervall		Evarate [cm/d]			Type	1-Tension	2-Wassergehalt
0.00413231	-2.92559	1	2	1	0.743196	0	0.413238			Pos	1-top	2-bot	(von oben nach unten)
0.045799	-3.01733	1	2	1	1.07241	0	0.367867			34	Time-Variable boundary conditions+
0.0874656	-3.08869	1	2	1	1.63973	0	0.364936			22.764	Final Time	Time Information
0.129132	-3.70031	1	2	1	1.98475	0	0.302381			905	Number of Data Points in Objective Function
0.170799	-4.5158	1	2	1	2.21411	0	0.292663		Interpolated Values	-5.19535	BC-top	[hPa]
0.212466	-4.17941	1	2	1	2.74538	0	0.295319			-3.94535	MP_top_ini	[hPa]	1
0.254132	-4.77064	1	2	1	2.9763	0	0.307323			-0.940528	MP_bot_ini	[hPa]	2
0.295799	-5.85117	1	2	1	3.63844	0	0.319699			0.309472	BC-bot	[hPa]
0.337466	-6.64628	1	2	1	3.97501	0	0.318984
0.379132	-7.62487	1	2	1	4.66032	0	0.302694
0.420799	-8.5525	1	2	1	5.16374	0	0.326521
0.462466	-9.37819	1	2	1	5.63777	0	0.311358		Real Values	-6.69343	BC-top	[cm]
0.504132	-10.1325	1	2	1	6.0824	0	0.299663			-5.44343	MP_top_ini	[cm]
0.545799	-10.9276	1	2	1	6.73664	0	0.279061			-2.93578	MP_bot_ini	[cm]
0.587466	-11.682	1	2	1	7.85734	0	0.255457			-1.68578	BC-bot	[cm]
0.629132	-12.3547	1	2	1	8.62445	0	0.252495
0.670799	-13.1091	1	2	1	9.59956	0	0.2484
0.712466	-13.7615	1	2	1	9.93371	0	0.236575
0.754132	-13.6697	1	2	1	10.5872	0	0.239769
0.795799	-14.4139	1	2	1	10.9435	0	0.238911
0.837466	-14.7604	1	2	1	11.5983	0	0.237763
0.879132	-15.1784	1	2	1	11.972	0	0.253744
0.920799	-15.6269	1	2	1	12.5913	0	0.243521
0.962466	-15.7492	1	2	1	13.0167	0	0.250516
1.00413	-16.0652	1	2	1	13.6555	0	0.241178
1.0458	-16.7584	1	2	1	14.0506	0	0.20982
1.08747	-17.1967	1	2	1	14.6139	0	0.17692
1.12913	-17.737	1	2	1	16.739	0	0.125589
1.1708	-18.1346	1	2	1	17.8596	0	0.0905724
1.21247	-18.5321	1	2	1	18.7495	0	0.0799702
1.25413	-18.7462	1	2	1	19.0049	0	0.0720537
1.2958	-19.2355	1	2	1	19.6515	0	0.0722275
1.33747	-19.5107	1	2	1	20.6503	0	0.06255
1.37913	-19.8675	1	2	1	22.764	0	0.0490032
1.4208	-20.0612	1	2	1
1.46247	-20.2446	1	2	1
1.50413	-20.5199	1	2	1
1.5458	-20.7645	1	2	1
1.58747	-21.0601	1	2	1
1.62913	-21.213	1	2	1
1.6708	-21.3558	1	2	1
1.71247	-21.5698	1	2	1
1.75413	-21.6922	1	2	1
1.79409	-21.7839	1	2	1
1.79826	-21.7839	1	2	1
1.80242	-21.8247	1	2	1
1.80659	-21.8247	1	2	1
1.81076	-21.8451	1	2	1
1.81492	-21.8858	1	2	1
1.81909	-21.9062	1	2	1
1.82326	-21.8858	1	2	1
1.82742	-21.947	1	2	1
1.83159	-21.9164	1	2	1
1.83576	-21.9674	1	2	1
1.87742	-22.1916	1	2	1
1.91909	-22.3344	1	2	1
1.96076	-22.5076	1	2	1
2.00242	-22.6402	1	2	1
2.04409	-22.946	1	2	1
2.08576	-23.0887	1	2	1
2.12742	-23.262	1	2	1
2.16909	-23.4353	1	2	1
2.21076	-23.5882	1	2	1
2.25242	-23.7819	1	2	1
2.29409	-23.8736	1	2	1
2.33576	-24.1284	1	2	1
2.37742	-24.2202	1	2	1
2.41909	-24.4037	1	2	1
2.46076	-24.6279	1	2	1
2.50242	-24.7095	1	2	1
2.54409	-24.8624	1	2	1
2.58576	-25.0459	1	2	1
2.62742	-25.1988	1	2	1
2.66909	-25.3721	1	2	1
2.71076	-25.4944	1	2	1
2.75242	-25.474	1	2	1
2.79409	-25.7288	1	2	1
2.83576	-25.9123	1	2	1
2.87742	-25.9939	1	2	1
2.91909	-26.208	1	2	1
2.96076	-25.5046	1	2	1
3.00242	-26.2793	1	2	1
3.04409	-26.473	1	2	1
3.08576	-26.7074	1	2	1
3.12742	-26.9215	1	2	1
3.16909	-27.105	1	2	1
3.21076	-27.2273	1	2	1
3.25242	-27.3904	1	2	1
3.29409	-27.6045	1	2	1
3.33576	-27.8084	1	2	1
3.37742	-27.9715	1	2	1
3.41909	-28.0938	1	2	1
3.46076	-28.2059	1	2	1
3.50242	-28.4302	1	2	1
3.54409	-28.6239	1	2	1
3.58576	-28.7666	1	2	1
3.62742	-28.9297	1	2	1
3.66909	-29.103	1	2	1
3.71076	-29.2661	1	2	1
3.75242	-29.4495	1	2	1
3.79409	-29.6126	1	2	1
3.83576	-29.7655	1	2	1
3.87742	-29.9388	1	2	1
3.91909	-30.1019	1	2	1
3.96076	-30.2854	1	2	1
4.00242	-30.2956	1	2	1
4.04409	-30.5403	1	2	1
4.08576	-30.7339	1	2	1
4.12742	-30.9072	1	2	1
4.16909	-31.0703	1	2	1
4.21076	-31.2334	1	2	1
4.25242	-31.4169	1	2	1
4.29409	-31.6106	1	2	1
4.33576	-31.7737	1	2	1
4.37742	-31.947	1	2	1
4.41909	-32.1203	1	2	1
4.46076	-32.2936	1	2	1
4.50242	-32.528	1	2	1
4.54409	-32.7217	1	2	1
4.58576	-32.9358	1	2	1
4.62742	-33.1295	1	2	1
4.66909	-33.2212	1	2	1
4.71076	-33.4964	1	2	1
4.75242	-33.7003	1	2	1
4.79409	-33.7717	1	2	1
4.83576	-34.0877	1	2	1
4.87742	-34.2915	1	2	1
4.91909	-34.526	1	2	1
4.96076	-34.8216	1	2	1
5.00242	-35.107	1	2	1
5.04409	-35.3415	1	2	1
5.08576	-35.6575	1	2	1
5.12742	-35.9327	1	2	1
5.16909	-36.1366	1	2	1
5.21076	-36.4628	1	2	1
5.25242	-36.7584	1	2	1
5.29409	-37.0336	1	2	1
5.33576	-37.2783	1	2	1
5.37742	-37.5535	1	2	1
5.41909	-37.8287	1	2	1
5.46076	-38.1346	1	2	1
5.50242	-38.4098	1	2	1
5.54409	-38.6646	1	2	1
5.58576	-38.8787	1	2	1
5.62742	-39.103	1	2	1
5.66909	-39.2966	1	2	1
5.71076	-39.5821	1	2	1
5.75242	-39.8777	1	2	1
5.79409	-40.1223	1	2	1
5.83576	-40.4179	1	2	1
5.87742	-40.7441	1	2	1
5.91909	-41.0296	1	2	1
5.96076	-41.3456	1	2	1
6.00242	-41.6922	1	2	1
6.04409	-41.7839	1	2	1
6.08576	-42.263	1	2	1
6.12742	-42.6402	1	2	1
6.16909	-43.0071	1	2	1
6.21076	-43.3945	1	2	1
6.25242	-43.7105	1	2	1
6.29409	-44.0469	1	2	1
6.33576	-44.4343	1	2	1
6.37742	-44.8012	1	2	1
6.41909	-45.1478	1	2	1
6.46076	-45.5046	1	2	1
6.50242	-45.8512	1	2	1
6.54409	-46.2691	1	2	1
6.58576	-46.5953	1	2	1
6.62742	-46.9113	1	2	1
6.66909	-47.3191	1	2	1
6.71076	-47.686	1	2	1
6.75242	-47.9511	1	2	1
6.79409	-48.3282	1	2	1
6.83576	-48.736	1	2	1
6.87742	-49.1233	1	2	1
6.91909	-49.5311	1	2	1
6.96076	-49.949	1	2	1
7.00242	-50.3772	1	2	1
7.04409	-50.8257	1	2	1
7.08576	-51.2946	1	2	1
7.12742	-51.7941	1	2	1
7.16909	-52.2732	1	2	1
7.21076	-52.7727	1	2	1
7.25242	-53.2926	1	2	1
7.29409	-53.792	1	2	1
7.33576	-54.3017	1	2	1
7.37742	-54.8624	1	2	1
7.41909	-55.4332	1	2	1
7.46076	-55.9939	1	2	1
7.50242	-56.5647	1	2	1
7.54409	-57.156	1	2	1
7.58576	-57.7574	1	2	1
7.62742	-58.3588	1	2	1
7.66909	-58.9399	1	2	1
7.71076	-59.5515	1	2	1
7.75242	-60.1937	1	2	1
7.79409	-60.8155	1	2	1
7.83576	-61.4985	1	2	1
7.87742	-62.1305	1	2	1
7.91909	-62.8033	1	2	1
7.96076	-63.5168	1	2	1
8.00242	-64.2508	1	2	1
8.04409	-65.0153	1	2	1
8.08576	-65.8308	1	2	1
8.12742	-66.6361	1	2	1
8.16909	-67.5025	1	2	1
8.21076	-68.369	1	2	1
8.25242	-69.2457	1	2	1
8.29409	-70.0815	1	2	1
8.33576	-70.9582	1	2	1
8.37742	-71.8756	1	2	1
8.41909	-72.8135	1	2	1
8.46076	-73.7207	1	2	1
8.50242	-74.5566	1	2	1
8.54409	-75.5352	1	2	1
8.58576	-76.524	1	2	1
8.62742	-76.9215	1	2	1
8.66909	-78.2365	1	2	1
8.71076	-79.2762	1	2	1
8.75242	-80.4485	1	2	1
8.79409	-81.5698	1	2	1
8.83576	-82.6707	1	2	1
8.87742	-83.6901	1	2	1
8.91909	-84.791	1	2	1
8.96076	-85.9021	1	2	1
9.00242	-87.0234	1	2	1
9.04409	-88.1549	1	2	1
9.08576	-89.3374	1	2	1
9.12742	-90.5607	1	2	1
9.16909	-91.6718	1	2	1
9.21076	-92.9256	1	2	1
9.25242	-94.1896	1	2	1
9.29409	-95.474	1	2	1
9.33576	-96.7482	1	2	1
9.37742	-98.0938	1	2	1
9.41909	-99.4495	1	2	1
9.46076	-100.826	1	2	1
9.50242	-102.202	1	2	1
9.54409	-103.578	1	2	1
9.58576	-104.913	1	2	1
9.62742	-106.106	1	2	1
9.66909	-107.584	1	2	1
9.71076	-109.093	1	2	1
9.75242	-110.571	1	2	1
9.79409	-112.181	1	2	1
9.83576	-113.721	1	2	1
9.87742	-115.311	1	2	1
9.91909	-116.983	1	2	1
9.96076	-118.41	1	2	1
10.0024	-120.153	1	2	1
10.0441	-121.947	1	2	1
10.0858	-123.792	1	2	1
10.1274	-125.647	1	2	1
10.1691	-127.482	1	2	1
10.2108	-129.327	1	2	1
10.2524	-131.131	1	2	1
10.2941	-132.895	1	2	1
10.3358	-134.659	1	2	1
10.3774	-136.493	1	2	1
10.4191	-138.257	1	2	1
10.4608	-140.041	1	2	1
10.5024	-141.784	1	2	1
10.5441	-143.486	1	2	1
10.5858	-145.168	1	2	1
10.6274	-146.656	1	2	1
10.6691	-148.267	1	2	1
10.7108	-149.888	1	2	1
10.7524	-151.498	1	2	1
10.7941	-153.14	1	2	1
10.8358	-154.709	1	2	1
10.8774	-156.239	1	2	1
10.9191	-157.727	1	2	1
10.9608	-159.011	1	2	1
11.0024	-160.52	1	2	1
11.0441	-162.008	1	2	1
11.0858	-163.354	1	2	1
11.1274	-164.791	1	2	1
11.1691	-166.218	1	2	1
11.2108	-167.543	1	2	1
11.2524	-168.756	1	2	1
11.2941	-170	1	2	1
11.3358	-171.305	1	2	1
11.3774	-172.518	1	2	1
11.4191	-173.721	1	2	1
11.4608	-174.883	1	2	1
11.5024	-176.086	1	2	1
11.5441	-177.207	1	2	1
11.5858	-178.206	1	2	1
11.6274	-179.032	1	2	1
11.6691	-180.204	1	2	1
11.7108	-181.111	1	2	1
11.7524	-181.641	1	2	1
11.7941	-183.089	1	2	1
11.8358	-184.393	1	2	1
11.8774	-185.586	1	2	1
11.9191	-186.748	1	2	1
11.9608	-187.859	1	2	1
12.0024	-188.94	1	2	1
12.0441	-190	1	2	1
12.0858	-191.05	1	2	1
12.1274	-192.039	1	2	1
12.1691	-193.028	1	2	1
12.2108	-193.965	1	2	1
12.2524	-194.924	1	2	1
12.2941	-195.851	1	2	1
12.3358	-196.728	1	2	1
12.3774	-197.717	1	2	1
12.4191	-198.634	1	2	1
12.4608	-199.572	1	2	1
12.5024	-200.499	1	2	1
12.5441	-201.407	1	2	1
12.5858	-202.294	1	2	1
12.6274	-203.425	1	2	1
12.6691	-204.353	1	2	1
12.7108	-205.189	1	2	1
12.7524	-206.137	1	2	1
12.7941	-207.013	1	2	1
12.8358	-207.88	1	2	1
12.8774	-208.767	1	2	1
12.9191	-209.715	1	2	1
12.9608	-210.571	1	2	1
13.0024	-211.488	1	2	1
13.051	-212.569	1	2	1
13.0927	-213.588	1	2	1
13.1344	-214.516	1	2	1
13.176	-215.484	1	2	1
13.2177	-216.432	1	2	1
13.2594	-217.441	1	2	1
13.301	-218.379	1	2	1
13.3427	-219.388	1	2	1
13.3844	-220.418	1	2	1
13.426	-221.417	1	2	1
13.4677	-222.467	1	2	1
13.5094	-223.466	1	2	1
13.551	-224.536	1	2	1
13.5927	-225.586	1	2	1
13.6344	-226.575	1	2	1
13.683	-227.849	1	2	1
13.7246	-228.991	1	2	1
13.7663	-230.02	1	2	1
13.808	-231.05	1	2	1
13.8496	-232.161	1	2	1
13.8913	-233.242	1	2	1
13.933	-234.19	1	2	1
13.9746	-235.576	1	2	1
14.0163	-236.779	1	2	1
14.058	-237.207	1	2	1
14.0996	-239.399	1	2	1
14.1413	-240.815	1	2	1
14.183	-242.141	1	2	1
14.2246	-243.405	1	2	1
14.2663	-244.648	1	2	1
14.308	-245.933	1	2	1
14.3496	-247.319	1	2	1
14.3913	-248.767	1	2	1
14.433	-250.214	1	2	1
14.4746	-251.641	1	2	1
14.5163	-253.262	1	2	1
14.558	-254.76	1	2	1
14.5996	-244.057	1	2	1
14.6483	-258.838	1	2	1
14.6899	-261.111	1	2	1
14.7316	-263.109	1	2	1
14.7733	-264.893	1	2	1
14.8149	-266.748	1	2	1
14.8566	-268.338	1	2	1
14.8983	-270.153	1	2	1
14.9399	-272.171	1	2	1
14.9816	-274.261	1	2	1
15.0233	-276.34	1	2	1
15.0649	-278.298	1	2	1
15.1066	-280.387	1	2	1
15.1483	-282.548	1	2	1
15.1899	-284.954	1	2	1
15.2316	-287.217	1	2	1
15.2733	-289.918	1	2	1
15.3149	-291.845	1	2	1
15.3566	-295.097	1	2	1
15.3983	-298.094	1	2	1
15.4399	-301.142	1	2	1
15.4816	-303.772	1	2	1
15.5233	-306.84	1	2	1
15.5649	-309.98	1	2	1
15.6066	-313.252	1	2	1
15.6483	-316.779	1	2	1
15.6899	-320.479	1	2	1
15.7316	-324.22	1	2	1
15.7733	-327.931	1	2	1
15.8149	-332.324	1	2	1
15.8566	-336.86	1	2	1
15.8983	-341.397	1	2	1
15.9399	-345.923	1	2	1
15.9816	-350.499	1	2	1
16.0233	-355.362	1	2	1
16.0649	-360.357	1	2	1
16.1066	-365.494	1	2	1
16.1483	-371.193	1	2	1
16.1899	-376.779	1	2	1
16.2316	-382.457	1	2	1
16.2733	-388.634	1	2	1
16.3149	-394.822	1	2	1
16.3566	-401.284	1	2	1
16.3983	-407.982	1	2	1
16.4399	-414.995	1	2	1
16.4816	-422.722	1	2	1
16.5233	-430.336	1	2	1
16.5649	-438.512	1	2	1
16.6066	-447.156	1	2	1
16.6483	-456.412	1	2	1
16.6899	-465.352	1	2	1
16.7316	-474.903	1	2	1
16.7733	-497.431	1	2	1
16.8149	-510.143	1	2	1
16.8566	-521.804	1	2	1
16.8983	-532.192	1	2	1
16.9399	-544.699	1	2	1
16.9816	-558.206	1	2	1
17.0233	-572.08	1	2	1
17.0649	-585.933	1	2	1
17.1066	-599.867	1	2	1
17.1483	-614.322	1	2	1
17.1899	-629.083	1	2	1
17.2316	-643.69	1	2	1
17.2733	-658.919	1	2	1
17.3149	-673.986	1	2	1
17.3566	-690.663	1	2	1
17.3983	-710.357	1	2	1
17.4399	-729.47	1	2	1
17.4816	-747.615	1	2	1
17.5233	-766.29	1	2	1
17.5649	-784.669	1	2	1
17.6066	-806.096	1	2	1
17.6274	-819.134	1	2	1
17.6483	-831.111	1	2	1
17.6899	-854.577	1	2	1
17.7316	-877.676	1	2	1
17.7524	-888.257	1	2	1
0.00413231	-5.38226	1	1	1
0.045799	-5.49439	1	1	1
0.0874656	-5.57594	1	1	1
0.129132	-6.17737	1	1	1
0.170799	-7.01325	1	1	1
0.212466	-6.80938	1	1	1
0.254132	-7.28848	1	1	1
0.295799	-8.3792	1	1	1
0.337466	-9.17431	1	1	1
0.379132	-10.1631	1	1	1
0.420799	-11.0907	1	1	1
0.462466	-11.9062	1	1	1
0.504132	-12.6504	1	1	1
0.545799	-13.4557	1	1	1
0.587466	-14.2406	1	1	1
0.629132	-14.8726	1	1	1
0.670799	-15.6167	1	1	1
0.712466	-16.2691	1	1	1
0.754132	-16.157	1	1	1
0.795799	-16.9419	1	1	1
0.837466	-17.2987	1	1	1
0.879132	-17.7166	1	1	1
0.920799	-18.1549	1	1	1
0.962466	-18.2671	1	1	1
1.00413	-18.6035	1	1	1
1.0458	-19.2457	1	1	1
1.08747	-19.735	1	1	1
1.12913	-20.265	1	1	1
1.1708	-20.6626	1	1	1
1.21247	-21.0703	1	1	1
1.25413	-21.2844	1	1	1
1.2958	-21.7737	1	1	1
1.33747	-22.0489	1	1	1
1.37913	-22.3955	1	1	1
1.4208	-22.5892	1	1	1
1.46247	-22.7931	1	1	1
1.50413	-23.0275	1	1	1
1.5458	-23.2926	1	1	1
1.58747	-23.5882	1	1	1
1.62913	-23.7513	1	1	1
1.6708	-23.8838	1	1	1
1.71247	-24.1081	1	1	1
1.75413	-24.2202	1	1	1
1.79409	-24.3017	1	1	1
1.79826	-24.3017	1	1	1
1.80242	-24.3527	1	1	1
1.80659	-24.3425	1	1	1
1.81076	-24.3833	1	1	1
1.81492	-24.4139	1	1	1
1.81909	-24.4139	1	1	1
1.82326	-24.3833	1	1	1
1.82742	-24.4241	1	1	1
1.83159	-24.4343	1	1	1
1.83576	-24.475	1	1	1
1.87742	-24.7197	1	1	1
1.91909	-24.842	1	1	1
1.96076	-25.0153	1	1	1
2.00242	-25.1478	1	1	1
2.04409	-25.4332	1	1	1
2.08576	-25.5861	1	1	1
2.12742	-25.7696	1	1	1
2.16909	-25.9123	1	1	1
2.21076	-26.0652	1	1	1
2.25242	-26.3099	1	1	1
2.29409	-26.371	1	1	1
2.33576	-26.6361	1	1	1
2.37742	-26.6972	1	1	1
2.41909	-26.9113	1	1	1
2.46076	-27.1356	1	1	1
2.50242	-27.1764	1	1	1
2.54409	-27.3904	1	1	1
2.58576	-27.5331	1	1	1
2.62742	-27.6962	1	1	1
2.66909	-27.8899	1	1	1
2.71076	-28.002	1	1	1
2.75242	-27.9715	1	1	1
2.79409	-28.2263	1	1	1
2.83576	-28.3588	1	1	1
2.87742	-28.4913	1	1	1
2.91909	-28.6952	1	1	1
2.96076	-28.002	1	1	1
3.00242	-28.7768	1	1	1
3.04409	-28.9704	1	1	1
3.08576	-29.2049	1	1	1
3.12742	-29.419	1	1	1
3.16909	-29.5923	1	1	1
3.21076	-29.7248	1	1	1
3.25242	-29.8777	1	1	1
3.29409	-30.0917	1	1	1
3.33576	-30.3058	1	1	1
3.37742	-30.4587	1	1	1
3.41909	-30.581	1	1	1
3.46076	-30.7034	1	1	1
3.50242	-30.9174	1	1	1
3.54409	-31.1213	1	1	1
3.58576	-31.264	1	1	1
3.62742	-31.4271	1	1	1
3.66909	-31.5698	1	1	1
3.71076	-31.7329	1	1	1
3.75242	-31.9266	1	1	1
3.79409	-32.0897	1	1	1
3.83576	-32.1916	1	1	1
3.87742	-32.4057	1	1	1
3.91909	-32.5484	1	1	1
3.96076	-32.7013	1	1	1
4.00242	-32.7829	1	1	1
4.04409	-33.0275	1	1	1
4.08576	-33.1702	1	1	1
4.12742	-33.3741	1	1	1
4.16909	-33.5678	1	1	1
4.21076	-33.7207	1	1	1
4.25242	-33.9042	1	1	1
4.29409	-34.1081	1	1	1
4.33576	-34.261	1	1	1
4.37742	-34.4241	1	1	1
4.41909	-34.5668	1	1	1
4.46076	-34.7808	1	1	1
4.50242	-35.0255	1	1	1
4.54409	-35.209	1	1	1
4.58576	-35.3823	1	1	1
4.62742	-35.6269	1	1	1
4.66909	-35.7187	1	1	1
4.71076	-35.9939	1	1	1
4.75242	-36.208	1	1	1
4.79409	-36.2895	1	1	1
4.83576	-36.5443	1	1	1
4.87742	-36.789	1	1	1
4.91909	-37.0336	1	1	1
4.96076	-37.3191	1	1	1
5.00242	-37.5841	1	1	1
5.04409	-37.8287	1	1	1
5.08576	-38.0938	1	1	1
5.12742	-38.4302	1	1	1
5.16909	-38.6239	1	1	1
5.21076	-38.9501	1	1	1
5.25242	-39.2559	1	1	1
5.29409	-39.4699	1	1	1
5.33576	-39.7655	1	1	1
5.37742	-40.0408	1	1	1
5.41909	-40.3364	1	1	1
5.46076	-40.632	1	1	1
5.50242	-40.8563	1	1	1
5.54409	-41.1519	1	1	1
5.58576	-41.3863	1	1	1
5.62742	-41.5902	1	1	1
5.66909	-41.7737	1	1	1
5.71076	-42.0795	1	1	1
5.75242	-42.3547	1	1	1
5.79409	-42.6198	1	1	1
5.83576	-42.9052	1	1	1
5.87742	-43.1906	1	1	1
5.91909	-43.5168	1	1	1
5.96076	-43.8328	1	1	1
6.00242	-44.159	1	1	1
6.04409	-44.2915	1	1	1
6.08576	-44.7604	1	1	1
6.12742	-45.1274	1	1	1
6.16909	-45.5148	1	1	1
6.21076	-45.8818	1	1	1
6.25242	-46.208	1	1	1
6.29409	-46.5545	1	1	1
6.33576	-46.9317	1	1	1
6.37742	-47.2987	1	1	1
6.41909	-47.6656	1	1	1
6.46076	-48.002	1	1	1
6.50242	-48.3588	1	1	1
6.54409	-48.7258	1	1	1
6.58576	-49.103	1	1	1
6.62742	-49.4292	1	1	1
6.66909	-49.8267	1	1	1
6.71076	-50.1937	1	1	1
6.75242	-50.4689	1	1	1
6.79409	-50.8563	1	1	1
6.83576	-51.2538	1	1	1
6.87742	-51.631	1	1	1
6.91909	-52.0183	1	1	1
6.96076	-52.4669	1	1	1
7.00242	-52.8746	1	1	1
7.04409	-53.3333	1	1	1
7.08576	-53.8124	1	1	1
7.12742	-54.3119	1	1	1
7.16909	-54.791	1	1	1
7.21076	-55.2905	1	1	1
7.25242	-55.7594	1	1	1
7.29409	-56.3099	1	1	1
7.33576	-56.8196	1	1	1
7.37742	-57.3802	1	1	1
7.41909	-57.9001	1	1	1
7.46076	-58.5117	1	1	1
7.50242	-59.0724	1	1	1
7.54409	-59.684	1	1	1
7.58576	-60.2854	1	1	1
7.62742	-60.8359	1	1	1
7.66909	-61.4781	1	1	1
7.71076	-62.0795	1	1	1
7.75242	-62.7319	1	1	1
7.79409	-63.3435	1	1	1
7.83576	-64.0265	1	1	1
7.87742	-64.6483	1	1	1
7.91909	-65.3211	1	1	1
7.96076	-66.0449	1	1	1
8.00242	-66.7584	1	1	1
8.04409	-67.5535	1	1	1
8.08576	-68.3588	1	1	1
8.12742	-69.1641	1	1	1
8.16909	-70.0408	1	1	1
8.21076	-70.8563	1	1	1
8.25242	-71.7635	1	1	1
8.29409	-72.6096	1	1	1
8.33576	-73.4964	1	1	1
8.37742	-74.3629	1	1	1
8.41909	-75.3517	1	1	1
8.46076	-76.2589	1	1	1
8.50242	-77.1254	1	1	1
8.54409	-78.0632	1	1	1
8.58576	-79.0928	1	1	1
8.62742	-79.4801	1	1	1
8.66909	-80.7951	1	1	1
8.71076	-81.8654	1	1	1
8.75242	-83.0275	1	1	1
8.79409	-84.1488	1	1	1
8.83576	-85.2701	1	1	1
8.87742	-86.2895	1	1	1
8.91909	-87.3904	1	1	1
8.96076	-88.4913	1	1	1
9.00242	-89.5719	1	1	1
9.04409	-90.7441	1	1	1
9.08576	-91.947	1	1	1
9.12742	-93.1702	1	1	1
9.16909	-94.3221	1	1	1
9.21076	-95.5556	1	1	1
9.25242	-96.8298	1	1	1
9.29409	-98.104	1	1	1
9.33576	-99.3986	1	1	1
9.37742	-100.754	1	1	1
9.41909	-102.069	1	1	1
9.46076	-103.486	1	1	1
9.50242	-104.883	1	1	1
9.54409	-106.269	1	1	1
9.58576	-107.604	1	1	1
9.62742	-108.777	1	1	1
9.66909	-110.275	1	1	1
9.71076	-111.733	1	1	1
9.75242	-113.262	1	1	1
9.79409	-114.873	1	1	1
9.83576	-116.453	1	1	1
9.87742	-118.043	1	1	1
9.91909	-119.735	1	1	1
9.96076	-121.142	1	1	1
10.0024	-122.926	1	1	1
10.0441	-124.699	1	1	1
10.0858	-126.565	1	1	1
10.1274	-128.43	1	1	1
10.1691	-130.306	1	1	1
10.2108	-132.1	1	1	1
10.2524	-133.986	1	1	1
10.2941	-135.77	1	1	1
10.3358	-137.594	1	1	1
10.3774	-139.399	1	1	1
10.4191	-141.182	1	1	1
10.4608	-142.997	1	1	1
10.5024	-144.781	1	1	1
10.5441	-146.493	1	1	1
10.5858	-148.277	1	1	1
10.6274	-149.766	1	1	1
10.6691	-151.448	1	1	1
10.7108	-153.068	1	1	1
10.7524	-154.669	1	1	1
10.7941	-156.381	1	1	1
10.8358	-158.002	1	1	1
10.8774	-159.551	1	1	1
10.9191	-161.06	1	1	1
10.9608	-162.375	1	1	1
11.0024	-163.894	1	1	1
11.0441	-165.372	1	1	1
11.0858	-166.871	1	1	1
11.1274	-168.328	1	1	1
11.1691	-169.766	1	1	1
11.2108	-171.152	1	1	1
11.2524	-172.457	1	1	1
11.2941	-173.782	1	1	1
11.3358	-175.138	1	1	1
11.3774	-176.422	1	1	1
11.4191	-177.666	1	1	1
11.4608	-178.991	1	1	1
11.5024	-180.214	1	1	1
11.5441	-181.478	1	1	1
11.5858	-182.62	1	1	1
11.6274	-183.802	1	1	1
11.6691	-185.015	1	1	1
11.7108	-186.055	1	1	1
11.7524	-186.891	1	1	1
11.7941	-188.624	1	1	1
11.8358	-190.092	1	1	1
11.8774	-191.458	1	1	1
11.9191	-192.793	1	1	1
11.9608	-194.047	1	1	1
12.0024	-195.321	1	1	1
12.0441	-196.514	1	1	1
12.0858	-197.778	1	1	1
12.1274	-198.991	1	1	1
12.1691	-200.204	1	1	1
12.2108	-201.437	1	1	1
12.2524	-202.63	1	1	1
12.2941	-203.874	1	1	1
12.3358	-205.148	1	1	1
12.3774	-206.391	1	1	1
12.4191	-207.645	1	1	1
12.4608	-208.919	1	1	1
12.5024	-210.194	1	1	1
12.5441	-211.468	1	1	1
12.5858	-212.64	1	1	1
12.6274	-213.639	1	1	1
12.6691	-214.924	1	1	1
12.7108	-216.228	1	1	1
12.7524	-217.543	1	1	1
12.7941	-218.848	1	1	1
12.8358	-220.122	1	1	1
12.8774	-221.437	1	1	1
12.9191	-222.762	1	1	1
12.9608	-224.2	1	1	1
13.0024	-225.535	1	1	1
13.051	-227.115	1	1	1
13.0927	-228.603	1	1	1
13.1344	-229.98	1	1	1
13.176	-231.366	1	1	1
13.2177	-232.752	1	1	1
13.2594	-234.261	1	1	1
13.301	-235.678	1	1	1
13.3427	-237.054	1	1	1
13.3844	-238.552	1	1	1
13.426	-240.061	1	1	1
13.4677	-241.509	1	1	1
13.5094	-243.048	1	1	1
13.551	-244.577	1	1	1
13.5927	-246.137	1	1	1
13.6344	-247.635	1	1	1
13.683	-249.307	1	1	1
13.7246	-251.091	1	1	1
13.7663	-252.885	1	1	1
13.808	-254.587	1	1	1
13.8496	-256.34	1	1	1
13.8913	-258.145	1	1	1
13.933	-259.969	1	1	1
13.9746	-261.835	1	1	1
14.0163	-263.802	1	1	1
14.058	-263.792	1	1	1
14.0996	-267.747	1	1	1
14.1413	-269.908	1	1	1
14.183	-272.11	1	1	1
14.2246	-274.322	1	1	1
14.2663	-276.667	1	1	1
14.308	-278.97	1	1	1
14.3496	-281.274	1	1	1
14.3913	-283.976	1	1	1
14.433	-286.544	1	1	1
14.4746	-289.174	1	1	1
14.5163	-291.743	1	1	1
14.558	-294.862	1	1	1
14.5996	-293.221	1	1	1
14.6483	-300.306	1	1	1
14.6899	-304.373	1	1	1
14.7316	-307.982	1	1	1
14.7733	-311.458	1	1	1
14.8149	-315.25	1	1	1
14.8566	-318.41	1	1	1
14.8983	-322.222	1	1	1
14.9399	-326.045	1	1	1
14.9816	-330.204	1	1	1
15.0233	-334.23	1	1	1
15.0649	-338.328	1	1	1
15.1066	-342.65	1	1	1
15.1483	-346.677	1	1	1
15.1899	-351.774	1	1	1
15.2316	-356.453	1	1	1
15.2733	-361.835	1	1	1
15.3149	-366.707	1	1	1
15.3566	-372.1	1	1	1
15.3983	-377.227	1	1	1
15.4399	-383.078	1	1	1
15.4816	-389.042	1	1	1
15.5233	-394.944	1	1	1
15.5649	-401.07	1	1	1
15.6066	-407.543	1	1	1
15.6483	-413.588	1	1	1
15.6899	-420.183	1	1	1
15.7316	-426.718	1	1	1
15.7733	-434.903	1	1	1
15.8149	-441.998	1	1	1
15.8566	-449.674	1	1	1
15.8983	-457.125	1	1	1
15.9399	-464.709	1	1	1
15.9816	-473.252	1	1	1
16.0233	-480.917	1	1	1
16.0649	-490.173	1	1	1
16.1066	-500.133	1	1	1
16.1483	-510.673	1	1	1
16.1899	-521.182	1	1	1
16.2316	-531.753	1	1	1
16.2733	-542.885	1	1	1
16.3149	-554.567	1	1	1
16.3566	-567.136	1	1	1
16.3983	-580.153	1	1	1
16.4399	-593.965	1	1	1
16.4816	-608.593	1	1	1
16.5233	-624.006	1	1	1
16.5649	-639.99	1	1	1
16.6066	-655.586	1	1	1
16.6483	-675.81	1	1	1
16.6899	-694.577	1	1	1
16.7316	-713.925	1	1	1
16.7733	-728.308	1	1	1
16.8149	-748.726	1	1	1
16.8566	-767.38	1	1	1
16.8983	-789.878	1	1	1
16.9399	-815.392	1	1	1
16.9816	-842.467	1	1	1
17.0233	-868.756	1	1	1
17.0649	-896.983	1	1	1
17.1066	-925.668	1	1	1
17.1483	-954.618	1	1	1
17.1899	-988.135	1	1	1
17.2316	-1023.61	1	1	1
17.2733	-1055.6	1	1	1
17.3149	-1092.23	1	1	1
17.3566	-1130.59	1	1	1
17.3983	-1171.56	1	1	1
17.4399	-1214.78	1	1	1
17.4816	-1259.56	1	1	1
17.5233	-1305.88	1	1	1
17.5649	-1356.02	1	1	1
17.6066	-1410.42	1	1	1
17.6274	-1440.47	1	1	1
19.301	-8970.44	1	1	1
0.743196	0.906672	2	0	100000
1.07241	0.88245	2	0	100000
1.63973	0.841043	2	0	100000
1.98475	0.820178	2	0	100000
2.21411	0.806753	2	0	100000
2.74538	0.775374	2	0	100000
2.9763	0.761181	2	0	100000
3.63844	0.718844	2	0	100000
3.97501	0.697372	2	0	100000
4.66032	0.655884	2	0	100000
5.16374	0.623008	2	0	100000
5.63777	0.59349	2	0	100000
6.0824	0.566842	2	0	100000
6.73664	0.530328	2	0	100000
7.85734	0.473069	2	0	100000
8.62445	0.434331	2	0	100000
9.59956	0.385888	2	0	100000
9.93371	0.370077	2	0	100000
10.5872	0.338738	2	0	100000
10.9435	0.321715	2	0	100000
11.5983	0.290578	2	0	100000
11.972	0.271613	2	0	100000
12.5913	0.241448	2	0	100000
13.0167	0.220137	2	0	100000
13.6555	0.189325	2	0	100000
14.0506	0.172746	2	0	100000
14.6139	0.15281	2	0	100000
16.739	0.0994339	2	0	100000
17.8596	0.0791347	2	0	100000
18.7495	0.0649009	2	0	100000
19.0049	0.0612212	2	0	100000
19.6515	0.0518803	2	0	100000
20.6503	0.0393854	2	0	100000
22.7628	0.0186818	2	0	100000

## Sheet: tens_interpolation
		Datum / Zeit	Tension unten [hPa]	Tension oben [hPa]
m_bot	b_bot	2013-07-31 15:49:15	0.65	3.59
82.8	-3.43509e+06	2013-07-31 16:09:15	1.8	4.76
m_top	b_top	2013-07-31 15:53:59	0.921717	3.86644
84.24	-3.49483e+06	y = m*x+b
		AE unten [t]	AE oben [t]
		41227.2
			Brutto-Gewicht [g]	Netto-Gewicht [g]
-1.40314	58626.9	2013-08-23 17:58:52	382.99	12.72
		2013-08-24 10:54:53	382	11.73
-1.40314	58256.7	2013-08-24 06:49:00	382.24	11.9696
			AE unten
m_bot	b_bot	2012-11-12 09:52:24	595.08	28.48
-3.5343	146298	2012-11-15 10:52:20	584.33	17.73
m_top	b_top	2012-11-16 08:39:32	581.122	14.5216
-3.5343	145731	y = m*x+b
