# Supplementary material for: A pore-size classification for peat bogs derived from unsaturated hydraulic properties
Source: Copernicus journal article supplement (doi:10.5194/hess-21-6185-2017), 2017-12-07
Supplement: Supplementary file 19 [file A332_7_HYDRUS.xlsx]

## Sheet: Gewicht
Datum / Zeit	Brutto-Gewicht [g]	Netto-Gewicht [g]	Gewichtsänderung [g]	Zeit [d]	Theta [-]	Verdunstungsrate [cm/d]		Volumen	249.4
2012-12-08 18:04:35	622.12	253.22	0					Höhe	5
2012-12-09 03:01:10	614.178	245.278		0.372626	0.939847	0.427302		A	49.88
2012-12-09 11:54:45	606.28	237.38	-15.84	0.743179	0.90818	0.427302		Theta0	0.971692
2012-12-09 19:47:36	600.17	231.27	-21.95	1.07154	0.883681	0.373049		Trockengewicht	10.88
2012-12-10 09:24:35	591.08	222.18	-31.04	1.63889	0.847233	0.321205		Ks (as in Ksat)
2012-12-10 17:41:41	585.95	217.05	-36.17	1.9841	0.826664	0.297927		delta System [g]	368.9
2012-12-10 23:11:46	582.72	213.82	-39.4	2.21333	0.813713	0.282493
2012-12-11 11:55:51	575.02	206.12	-47.1	2.74394	0.782839	0.29093
2012-12-11 17:30:43	571.26	202.36	-50.86	2.97648	0.767763	0.324158
2012-12-12 09:24:48	559.97	191.07	-62.15	3.63904	0.722494	0.341621
2012-12-12 17:29:28	554.41	185.51	-67.71	3.97561	0.7002	0.331183
2012-12-13 09:57:28	543.69	174.79	-78.43	4.66172	0.657217	0.313238
2012-12-13 22:00:40	535.29	166.39	-86.83	5.16395	0.623536	0.335317
2012-12-14 09:23:15	527.43	158.53	-94.69	5.63797	0.592021	0.332427
2012-12-14 20:03:23	520.67	151.77	-101.45	6.08251	0.564916	0.30487
2012-12-15 11:46:13	511.09	142.19	-111.03	6.73725	0.526504	0.293338
2012-12-16 14:40:02	496.69	127.79	-125.43	7.85796	0.468765	0.257599
2012-12-17 09:04:04	486.88	117.98	-135.24	8.62464	0.429431	0.256522
2012-12-18 08:28:14	475.02	106.12	-147.1	9.59976	0.381877	0.243838
2012-12-18 16:29:23	471.29	102.39	-150.83	9.9339	0.366921	0.223799
2012-12-19 08:10:28	464.08	95.18	-158.04	10.5874	0.338011	0.221181
2012-12-19 16:43:32	460.05	91.15	-162.07	10.9437	0.321852	0.226757
2012-12-20 08:26:14	452.96	84.06	-169.16	11.5984	0.293424	0.217124
2012-12-20 17:25:06	448.3	79.4	-173.82	11.9726	0.274739	0.249656
2012-12-21 08:17:00	440.8	71.9	-181.32	12.592	0.244667	0.242763
2012-12-21 18:29:34	435.46	66.56	-186.66	13.0174	0.223256	0.251667
2012-12-22 09:49:21	427.71	58.81	-194.41	13.6561	0.192181	0.243249
2012-12-22 19:18:18	423.38	54.48	-198.74	14.0512	0.17482	0.219713
2012-12-23 08:48:45	417.78	48.88	-204.34	14.614	0.152366	0.199476
2012-12-25 11:48:13	402.83	33.93	-219.29	16.7386	0.0924218	0.141069
2012-12-26 14:42:02	397.64	28.74	-224.48	17.8593	0.0716119	0.0928426
2012-12-27 12:03:41	394.39	25.49	-227.73	18.7494	0.0585806	0.0732067
2012-12-27 18:12:51	393.56	24.66	-228.56	19.0057	0.0552526	0.0649064
2012-12-28 09:43:38	391.56	22.66	-230.56	19.6521	0.0472334	0.0620326
2012-12-29 09:41:17	388.91	20.01	-233.21	20.6505	0.0366079	0.053214
2012-12-31 12:23:00	384.82	15.92	-237.3	22.7628	0.0202085	0.0388189

## Sheet: Tensionen
Datum / Zeit	Tension unten [hPa]	Tension oben [hPa]	Datum / Zeit	Zeit [d]		Zeit [d]	MP bot(2) [cm]	MP top(1) [cm]		Versuchsbeginn
2012-12-08 17:51:08	2.74	5.18	22.01	-0.381964		-0.381964	-2.79307	-5.28033		2012-12-09 03:01:10
2012-12-08 17:52:08	2.78	5.2	22.02	-0.38127		-0.38127	-2.83384	-5.30071
2012-12-08 17:53:08	2.78	5.2	22.02	-0.380575		-0.380575	-2.83384	-5.30071
2012-12-08 17:54:08	2.81	5.21	22.03	-0.379881		-0.379881	-2.86442	-5.31091
2012-12-08 17:55:08	2.83	5.23	22.04	-0.379187		-0.379187	-2.88481	-5.33129
2012-12-08 17:56:08	2.85	5.34	22.04	-0.378492		-0.378492	-2.9052	-5.44343
2012-12-08 17:57:08	2.89	5.29	22.04	-0.377798		-0.377798	-2.94597	-5.39246
2012-12-08 17:58:08	2.92	5.32	22.05	-0.377103		-0.377103	-2.97655	-5.42304
2012-12-08 17:59:08	2.93	5.33	22.05	-0.376409		-0.376409	-2.98675	-5.43323
2012-12-08 18:00:08	2.97	5.35	22.06	-0.375714		-0.375714	-3.02752	-5.45362
2012-12-08 18:01:08	3	5.38	22.06	-0.37502		-0.37502	-3.0581	-5.4842
2012-12-08 18:02:08	3.02	5.41	22.07	-0.374325		-0.374325	-3.07849	-5.51478
2012-12-08 18:03:08	3.04	5.43	22.07	-0.373631		-0.373631	-3.09888	-5.53517
2012-12-08 18:04:08	3.05	5.43	22.08	-0.372937		-0.372937	-3.10907	-5.53517
2012-12-08 18:05:08	2.48	4.86	22.08	-0.372242		-0.372242	-2.52803	-4.95413
2012-12-08 18:06:08	2.51	4.89	22.08	-0.371548		-0.371548	-2.55861	-4.98471
2012-12-08 18:07:08	2.54	4.94	22.09	-0.370853		-0.370853	-2.58919	-5.03568
2012-12-08 18:08:08	2.55	4.95	22.09	-0.370159		-0.370159	-2.59939	-5.04587
2012-12-08 18:09:08	2.57	4.97	22.09	-0.369464		-0.369464	-2.61978	-5.06626
2012-12-08 18:10:08	2.6	5	22.1	-0.36877		-0.36877	-2.65036	-5.09684
2012-12-08 18:11:08	2.61	5.01	22.11	-0.368075		-0.368075	-2.66055	-5.10703
2012-12-08 18:12:08	2.63	5.02	22.12	-0.367381		-0.367381	-2.68094	-5.11723
2012-12-08 18:13:08	2.66	5.05	22.13	-0.366687		-0.366687	-2.71152	-5.14781
2012-12-08 18:14:08	2.67	5.07	22.14	-0.365992		-0.365992	-2.72171	-5.1682
2012-12-08 18:15:08	2.71	5.08	22.15	-0.365298		-0.365298	-2.76249	-5.17839
2012-12-08 18:16:08	2.73	5.11	22.15	-0.364603		-0.364603	-2.78287	-5.20897
2012-12-08 18:17:08	2.77	5.14	22.16	-0.363909		-0.363909	-2.82365	-5.23955
2012-12-08 18:18:08	2.78	5.17	22.17	-0.363214		-0.363214	-2.83384	-5.27013
2012-12-08 18:19:08	2.79	5.18	22.18	-0.36252		-0.36252	-2.84404	-5.28033
2012-12-08 18:20:08	2.84	5.23	22.18	-0.361825		-0.361825	-2.89501	-5.33129
2012-12-08 18:21:08	2.85	5.24	22.19	-0.361131		-0.361131	-2.9052	-5.34149
2012-12-08 18:22:08	2.89	5.26	22.19	-0.360437		-0.360437	-2.94597	-5.36188
2012-12-08 18:23:08	2.91	5.3	22.2	-0.359742		-0.359742	-2.96636	-5.40265
2012-12-08 18:24:08	2.93	5.31	22.2	-0.359048		-0.359048	-2.98675	-5.41284
2012-12-08 18:25:08	2.97	5.35	22.2	-0.358353		-0.358353	-3.02752	-5.45362
2012-12-08 18:26:08	2.98	5.35	22.2	-0.357659		-0.357659	-3.03772	-5.45362
2012-12-08 18:27:08	3	5.39	22.2	-0.356964		-0.356964	-3.0581	-5.49439
2012-12-08 18:28:08	3.03	5.41	22.2	-0.35627		-0.35627	-3.08869	-5.51478
2012-12-08 18:29:08	3.05	5.43	22.2	-0.355575		-0.355575	-3.10907	-5.53517
2012-12-08 18:30:08	3.08	5.46	22.2	-0.354881		-0.354881	-3.13965	-5.56575
2012-12-08 18:31:08	3.1	5.48	22.2	-0.354187		-0.354187	-3.16004	-5.58614
2012-12-08 18:32:08	3.14	5.52	22.2	-0.353492		-0.353492	-3.20082	-5.62691
2012-12-08 18:33:08	3.18	5.55	22.19	-0.352798		-0.352798	-3.24159	-5.65749
2012-12-08 18:34:08	3.19	5.58	22.19	-0.352103		-0.352103	-3.25178	-5.68807
2012-12-08 18:35:08	3.23	5.59	22.19	-0.351409		-0.351409	-3.29256	-5.69827
2012-12-08 18:36:08	3.25	5.62	22.18	-0.350714		-0.350714	-3.31295	-5.72885
2012-12-08 18:37:08	3.27	5.65	22.18	-0.35002		-0.35002	-3.33333	-5.75943
2012-12-08 18:38:08	3.3	5.67	22.17	-0.349325		-0.349325	-3.36391	-5.77982
2012-12-08 18:39:08	3.32	5.69	22.16	-0.348631		-0.348631	-3.3843	-5.8002
2012-12-08 18:40:08	3.35	5.71	22.16	-0.347937		-0.347937	-3.41488	-5.82059
2012-12-08 18:41:08	3.38	5.75	22.15	-0.347242		-0.347242	-3.44546	-5.86137
2012-12-08 18:42:08	3.39	5.78	22.15	-0.346548		-0.346548	-3.45566	-5.89195
2012-12-08 18:43:08	3.41	5.8	22.14	-0.345853		-0.345853	-3.47604	-5.91233
2012-12-08 18:44:08	3.46	5.84	22.13	-0.345159		-0.345159	-3.52701	-5.95311
2012-12-08 18:45:08	3.48	5.87	22.12	-0.344464		-0.344464	-3.5474	-5.98369
2012-12-08 18:46:08	3.5	5.88	22.12	-0.34377		-0.34377	-3.56779	-5.99388
2012-12-08 18:47:08	3.54	5.91	22.11	-0.343075		-0.343075	-3.60856	-6.02446
2012-12-08 18:48:08	3.55	5.93	22.1	-0.342381		-0.342381	-3.61876	-6.04485
2012-12-08 18:49:08	3.57	5.95	22.09	-0.341687		-0.341687	-3.63914	-6.06524
2012-12-08 18:50:08	3.61	6	22.09	-0.340992		-0.340992	-3.67992	-6.11621
2012-12-08 18:51:08	3.63	6.02	22.08	-0.340298		-0.340298	-3.70031	-6.1366
2012-12-08 19:01:08	3.89	6.26	21.99	-0.333353		-0.333353	-3.96534	-6.38124
2012-12-08 19:11:08	4.09	6.49	21.9	-0.326409		-0.326409	-4.16922	-6.6157
2012-12-08 19:21:08	4.35	6.77	21.8	-0.319464		-0.319464	-4.43425	-6.90112
2012-12-08 19:31:08	4.57	6.99	21.71	-0.31252		-0.31252	-4.65851	-7.12538
2012-12-08 19:41:08	3.74	6.17	21.61	-0.305575		-0.305575	-3.81244	-6.2895
2012-12-08 19:51:08	4.15	6.59	21.52	-0.298631		-0.298631	-4.23038	-6.71764
2012-12-08 20:01:08	4.49	6.94	21.44	-0.291687		-0.291687	-4.57696	-7.07441
2012-12-08 20:11:08	4.77	7.22	21.35	-0.284742		-0.284742	-4.86239	-7.35984
2012-12-08 20:21:08	3.97	6.43	21.28	-0.277798		-0.277798	-4.04689	-6.55454
2012-12-08 20:31:08	4.39	6.86	21.2	-0.270853		-0.270853	-4.47503	-6.99286
2012-12-08 20:41:08	4.71	7.18	21.13	-0.263909		-0.263909	-4.80122	-7.31906
2012-12-08 20:51:08	3.71	6.12	21.06	-0.256964		-0.256964	-3.78186	-6.23853
2012-12-08 21:01:08	4.2	6.68	21	-0.25002		-0.25002	-4.28135	-6.80938
2012-12-08 21:11:08	4.57	7.06	20.94	-0.243075		-0.243075	-4.65851	-7.19674
2012-12-08 21:21:08	4.89	7.37	20.88	-0.236131		-0.236131	-4.98471	-7.51274
2012-12-08 21:31:08	4.22	6.72	20.83	-0.229187		-0.229187	-4.30173	-6.85015
2012-12-08 21:41:08	4.62	7.12	20.78	-0.222242		-0.222242	-4.70948	-7.2579
2012-12-08 21:51:08	4.94	7.45	20.73	-0.215298		-0.215298	-5.03568	-7.59429
2012-12-08 22:01:08	3.9	6.4	20.69	-0.208353		-0.208353	-3.97554	-6.52396
2012-12-08 22:11:08	4.36	6.86	20.65	-0.201409		-0.201409	-4.44444	-6.99286
2012-12-08 22:21:08	4.71	7.22	20.61	-0.194464		-0.194464	-4.80122	-7.35984
2012-12-08 22:31:08	5.04	7.57	20.58	-0.18752		-0.18752	-5.13761	-7.71662
2012-12-08 22:41:08	3.82	6.34	20.54	-0.180575		-0.180575	-3.89399	-6.46279
2012-12-08 22:51:08	4.25	6.79	20.51	-0.173631		-0.173631	-4.33231	-6.92151
2012-12-08 23:01:08	4.62	7.15	20.48	-0.166687		-0.166687	-4.70948	-7.28848
2012-12-08 23:11:08	4.95	7.48	20.45	-0.159742		-0.159742	-5.04587	-7.62487
2012-12-08 23:21:08	5.26	7.8	20.42	-0.152798		-0.152798	-5.36188	-7.95107
2012-12-08 23:31:08	3.48	6.01	20.4	-0.145853		-0.145853	-3.5474	-6.1264
2012-12-08 23:41:08	3.52	6.05	20.38	-0.138909		-0.138909	-3.58818	-6.16718
2012-12-08 23:51:08	3.6	6.16	20.36	-0.131964		-0.131964	-3.66972	-6.27931
2012-12-09 00:01:08	3.7	6.25	20.33	-0.12502		-0.12502	-3.77166	-6.37105
2012-12-09 00:11:08	3.77	6.32	20.31	-0.118075		-0.118075	-3.84302	-6.44241
2012-12-09 00:21:08	3.84	6.41	20.29	-0.111131		-0.111131	-3.91437	-6.53415
2012-12-09 00:31:08	4	6.56	20.27	-0.104187		-0.104187	-4.07747	-6.68705
2012-12-09 00:41:08	4.17	6.71	20.26	-0.0972421		-0.0972421	-4.25076	-6.83996
2012-12-09 00:51:08	3.89	6.45	20.24	-0.0902977		-0.0902977	-3.96534	-6.57492
2012-12-09 01:01:08	3.78	6.34	20.22	-0.0833532		-0.0833532	-3.85321	-6.46279
2012-12-09 01:11:08	3.88	6.42	20.21	-0.0764088		-0.0764088	-3.95515	-6.54434
2012-12-09 01:21:08	3.98	6.55	20.2	-0.0694643		-0.0694643	-4.05708	-6.67686
2012-12-09 01:31:08	4.08	6.64	20.18	-0.0625199		-0.0625199	-4.15902	-6.7686
2012-12-09 01:41:08	4.18	6.76	20.17	-0.0555754		-0.0555754	-4.26096	-6.89093
2012-12-09 01:51:08	4.24	6.81	20.16	-0.048631		-0.048631	-4.32212	-6.9419
2012-12-09 02:01:08	4.36	6.92	20.15	-0.0416866		-0.0416866	-4.44444	-7.05403
2012-12-09 02:11:08	4.48	7.05	20.14	-0.0347421		-0.0347421	-4.56677	-7.18654
2012-12-09 02:21:08	4.61	7.18	20.13	-0.0277977		-0.0277977	-4.69929	-7.31906
2012-12-09 02:31:08	4.79	7.35	20.12	-0.0208532		-0.0208532	-4.88277	-7.49235
2012-12-09 02:41:08	4.63	7.19	20.11	-0.0139088		-0.0139088	-4.71967	-7.32926
2012-12-09 02:51:08	4.86	7.42	20.11	-0.00696434		-0.00696434	-4.95413	-7.56371
2012-12-09 03:01:08	4.2	6.77	20.11	-1.98929e-05		-1.98929e-05	-4.28135	-6.90112
2012-12-09 03:11:08	4.36	6.91	20.1	0.00692455	41252.1	0.00692455	-4.44444	-7.04383
2012-12-09 03:21:08	4.48	7.04	20.1	0.013869		0.013869	-4.56677	-7.17635
2012-12-09 03:31:08	4.5	7.07	20.1	0.0208134		0.0208134	-4.58716	-7.20693
2012-12-09 03:41:08	4.65	7.21	20.1	0.0277579		0.0277579	-4.74006	-7.34964
2012-12-09 03:51:08	4.73	7.29	20.1	0.0347023		0.0347023	-4.82161	-7.43119
2012-12-09 04:01:08	4.74	7.31	20.1	0.0416468		0.0416468	-4.8318	-7.45158
2012-12-09 04:11:08	4.81	7.36	20.1	0.0485912	41252.2	0.0485912	-4.90316	-7.50255
2012-12-09 04:21:08	4.87	7.47	20.1	0.0555357		0.0555357	-4.96432	-7.61468
2012-12-09 04:31:08	5.03	7.58	20.11	0.0624801		0.0624801	-5.12742	-7.72681
2012-12-09 04:41:08	5.12	7.68	20.12	0.0694246		0.0694246	-5.21916	-7.82875
2012-12-09 04:51:08	5.26	7.82	20.12	0.076369		0.076369	-5.36188	-7.97146
2012-12-09 05:01:08	5.41	7.97	20.13	0.0833134		0.0833134	-5.51478	-8.12436
2012-12-09 05:11:08	5.49	8.05	20.13	0.0902579	41252.2	0.0902579	-5.59633	-8.20591
2012-12-09 05:21:08	5.62	8.17	20.14	0.0972023		0.0972023	-5.72885	-8.32824
2012-12-09 05:31:08	5.73	8.29	20.14	0.104147		0.104147	-5.84098	-8.45056
2012-12-09 05:41:08	5.86	8.41	20.14	0.111091		0.111091	-5.9735	-8.57288
2012-12-09 05:51:08	6.01	8.57	20.14	0.118036		0.118036	-6.1264	-8.73598
2012-12-09 06:01:08	6.12	8.68	20.14	0.12498		0.12498	-6.23853	-8.84811
2012-12-09 06:11:08	6.3	8.85	20.14	0.131925	41252.3	0.131925	-6.42202	-9.02141
2012-12-09 06:21:08	6.43	8.99	20.14	0.138869		0.138869	-6.55454	-9.16412
2012-12-09 06:31:08	6.53	9.09	20.14	0.145813		0.145813	-6.65647	-9.26606
2012-12-09 06:41:08	6.66	9.22	20.14	0.152758		0.152758	-6.78899	-9.39857
2012-12-09 06:51:08	6.78	9.33	20.15	0.159702		0.159702	-6.91131	-9.5107
2012-12-09 07:01:08	6.91	9.48	20.15	0.166647		0.166647	-7.04383	-9.66361
2012-12-09 07:11:08	7.04	9.59	20.15	0.173591	41252.3	0.173591	-7.17635	-9.77574
2012-12-09 07:21:08	7.18	9.73	20.15	0.180536		0.180536	-7.31906	-9.91845
2012-12-09 07:31:08	7.28	9.84	20.15	0.18748		0.18748	-7.421	-10.0306
2012-12-09 07:41:08	7.27	9.83	20.15	0.194425		0.194425	-7.41081	-10.0204
2012-12-09 07:51:08	7.41	9.97	20.15	0.201369		0.201369	-7.55352	-10.1631
2012-12-09 08:01:08	7.53	10.08	20.15	0.208313		0.208313	-7.67584	-10.2752
2012-12-09 08:11:08	7.64	10.2	20.15	0.215258	41252.3	0.215258	-7.78797	-10.3976
2012-12-09 08:21:08	7.7	10.27	20.15	0.222202		0.222202	-7.84913	-10.4689
2012-12-09 08:31:08	7.8	10.36	20.16	0.229147		0.229147	-7.95107	-10.5607
2012-12-09 08:41:08	7.9	10.47	20.16	0.236091		0.236091	-8.05301	-10.6728
2012-12-09 08:51:08	8.01	10.57	20.17	0.243036		0.243036	-8.16514	-10.7747
2012-12-09 09:01:08	7.89	10.46	20.17	0.24998		0.24998	-8.04281	-10.6626
2012-12-09 09:11:08	8.05	10.61	20.17	0.256925	41252.4	0.256925	-8.20591	-10.8155
2012-12-09 09:21:08	8.16	10.71	20.17	0.263869		0.263869	-8.31804	-10.9174
2012-12-09 09:31:08	8.27	10.82	20.17	0.270813		0.270813	-8.43017	-11.0296
2012-12-09 09:41:08	8.01	10.56	20.17	0.277758		0.277758	-8.16514	-10.7645
2012-12-09 09:51:08	8.22	10.79	20.17	0.284702		0.284702	-8.3792	-10.999
2012-12-09 10:01:08	8.28	10.83	20.17	0.291647		0.291647	-8.44037	-11.0398
2012-12-09 10:11:08	8.43	10.98	20.17	0.298591	41252.4	0.298591	-8.59327	-11.1927
2012-12-09 10:21:08	8.47	11.02	20.17	0.305536		0.305536	-8.63405	-11.2334
2012-12-09 10:31:08	8.61	11.15	20.17	0.31248		0.31248	-8.77676	-11.366
2012-12-09 10:41:08	8.71	11.27	20.17	0.319425		0.319425	-8.8787	-11.4883
2012-12-09 10:51:08	8.82	11.4	20.17	0.326369		0.326369	-8.99083	-11.6208
2012-12-09 11:01:08	8.89	11.45	20.17	0.333313		0.333313	-9.06218	-11.6718
2012-12-09 11:11:08	8.82	11.39	20.17	0.340258	41252.5	0.340258	-8.99083	-11.6106
2012-12-09 11:21:08	8.97	11.52	20.17	0.347202		0.347202	-9.14373	-11.7431
2012-12-09 11:31:08	9.11	11.66	20.17	0.354147		0.354147	-9.28644	-11.8858
2012-12-09 11:41:08	9.13	11.69	20.16	0.361091		0.361091	-9.30683	-11.9164
2012-12-09 11:51:08	8.87	11.44	20.15	0.368036		0.368036	-9.04179	-11.6616
2012-12-09 12:01:08	8.82	11.38	20.14	0.37498		0.37498	-8.99083	-11.6004
2012-12-09 12:11:08	8.81	11.35	20.19	0.381925	41252.5	0.381925	-8.98063	-11.5698
2012-12-09 12:21:08	8.97	11.5	20.25	0.388869		0.388869	-9.14373	-11.7227
2012-12-09 12:31:08	9.11	11.64	20.27	0.395813		0.395813	-9.28644	-11.8654
2012-12-09 12:41:08	9.2	11.73	20.28	0.402758		0.402758	-9.37819	-11.9572
2012-12-09 12:51:08	9.28	11.82	20.29	0.409702		0.409702	-9.45973	-12.0489
2012-12-09 13:11:08	9.45	11.96	20.3	0.423591		0.423591	-9.63303	-12.1916
2012-12-09 13:21:08	9.54	12.08	20.31	0.430536	41252.6	0.430536	-9.72477	-12.314
2012-12-09 13:31:08	9.61	12.13	20.31	0.43748		0.43748	-9.79613	-12.3649
2012-12-09 13:41:08	9.74	12.27	20.31	0.444425		0.444425	-9.92864	-12.5076
2012-12-09 13:51:08	9.81	12.31	20.32	0.451369		0.451369	-10	-12.5484
2012-12-09 14:01:08	9.91	12.45	20.32	0.458313		0.458313	-10.1019	-12.6911
2012-12-09 14:11:08	9.56	12.08	20.33	0.465258		0.465258	-9.74516	-12.314
2012-12-09 14:21:08	9.74	12.26	20.33	0.472202	41252.6	0.472202	-9.92864	-12.4975
2012-12-09 14:31:08	9.85	12.37	20.33	0.479147		0.479147	-10.0408	-12.6096
2012-12-09 14:41:08	9.95	12.47	20.34	0.486091		0.486091	-10.1427	-12.7115
2012-12-09 14:51:08	10.05	12.57	20.35	0.493036		0.493036	-10.2446	-12.8135
2012-12-09 15:01:08	10.02	12.52	20.36	0.49998		0.49998	-10.2141	-12.7625
2012-12-09 15:11:08	10.15	12.65	20.36	0.506925		0.506925	-10.3466	-12.895
2012-12-09 15:31:08	10.34	12.85	20.38	0.520813	41252.6	0.520813	-10.5403	-13.0989
2012-12-09 15:41:08	10.41	12.91	20.39	0.527758		0.527758	-10.6116	-13.16
2012-12-09 15:51:08	10.46	12.98	20.4	0.534702		0.534702	-10.6626	-13.2314
2012-12-09 16:01:08	10.51	13.03	20.4	0.541647		0.541647	-10.7136	-13.2824
2012-12-09 16:11:08	10.54	13.07	20.41	0.548591		0.548591	-10.7441	-13.3231
2012-12-09 16:21:08	10.64	13.16	20.44	0.555536		0.555536	-10.8461	-13.4149
2012-12-09 16:31:08	10.72	13.26	20.49	0.56248	41252.7	0.56248	-10.9276	-13.5168
2012-12-09 16:41:08	11.81	12.98	20.54	0.569425		0.569425	-12.0387	-13.2314
2012-12-09 16:51:08	10.42	12.91	20.61	0.576369		0.576369	-10.6218	-13.16
2012-12-09 17:01:08	10.61	13.1	20.69	0.583313		0.583313	-10.8155	-13.3537
2012-12-09 17:11:08	10.67	13.17	20.77	0.590258		0.590258	-10.8767	-13.4251
2012-12-09 17:21:08	10.72	13.23	20.85	0.597202		0.597202	-10.9276	-13.4862
2012-12-09 17:31:08	10.85	13.32	20.91	0.604147	41252.7	0.604147	-11.0601	-13.578
2012-12-09 17:41:08	10.94	13.39	20.93	0.611091		0.611091	-11.1519	-13.6493
2012-12-09 17:51:08	11.01	13.46	20.94	0.618036		0.618036	-11.2232	-13.7207
2012-12-09 18:01:08	11.13	13.57	20.93	0.62498		0.62498	-11.3456	-13.8328
2012-12-09 18:11:08	11.24	13.68	20.93	0.631925		0.631925	-11.4577	-13.945
2012-12-09 18:21:08	11.3	13.74	20.93	0.638869		0.638869	-11.5189	-14.0061
2012-12-09 18:31:08	11.4	13.84	20.92	0.645813	41252.8	0.645813	-11.6208	-14.1081
2012-12-09 18:41:08	11.48	13.92	20.91	0.652758		0.652758	-11.7023	-14.1896
2012-12-09 18:51:08	11.54	13.99	20.9	0.659702		0.659702	-11.7635	-14.261
2012-12-09 19:01:08	11.58	14.03	20.88	0.666647		0.666647	-11.8043	-14.3017
2012-12-09 19:11:08	11.66	14.12	20.87	0.673591		0.673591	-11.8858	-14.3935
2012-12-09 19:21:08	11.75	14.19	20.85	0.680536		0.680536	-11.9776	-14.4648
2012-12-09 19:31:08	11.86	14.33	20.84	0.68748	41252.8	0.68748	-12.0897	-14.6075
2012-12-09 19:41:08	11.92	14.38	20.83	0.694425		0.694425	-12.1509	-14.6585
2012-12-09 19:51:08	11.91	14.37	20.81	0.701369		0.701369	-12.1407	-14.6483
2012-12-09 20:01:08	12.01	14.48	20.83	0.708313		0.708313	-12.2426	-14.7604
2012-12-09 20:11:08	12.08	14.54	20.84	0.715258		0.715258	-12.314	-14.8216
2012-12-09 20:21:08	12.09	14.56	20.83	0.722202		0.722202	-12.3242	-14.842
2012-12-09 20:31:08	12.15	14.61	20.82	0.729147	41252.9	0.729147	-12.3853	-14.893
2012-12-09 20:41:08	11.96	14.42	20.82	0.736091		0.736091	-12.1916	-14.6993
2012-12-09 20:51:08	12.14	14.61	20.81	0.743036		0.743036	-12.3751	-14.893
2012-12-09 21:01:08	12.23	14.69	20.8	0.74998		0.74998	-12.4669	-14.9745
2012-12-09 21:11:08	12.34	14.81	20.8	0.756925		0.756925	-12.579	-15.0968
2012-12-09 21:21:08	12.37	14.85	20.79	0.763869		0.763869	-12.6096	-15.1376
2012-12-09 21:31:08	12.47	14.94	20.79	0.770813	41252.9	0.770813	-12.7115	-15.2294
2012-12-09 21:41:08	12.53	15	20.78	0.777758		0.777758	-12.7727	-15.2905
2012-12-09 21:51:08	12.55	15.02	20.77	0.784702		0.784702	-12.7931	-15.3109
2012-12-09 22:01:08	12.58	15.05	20.77	0.791647		0.791647	-12.8236	-15.3415
2012-12-09 22:11:08	12.67	15.15	20.76	0.798591		0.798591	-12.9154	-15.4434
2012-12-09 22:21:08	12.76	15.24	20.76	0.805536		0.805536	-13.0071	-15.5352
2012-12-09 22:31:08	12.83	15.31	20.75	0.81248	41252.9	0.81248	-13.0785	-15.6065
2012-12-09 22:41:08	12.89	15.37	20.75	0.819425		0.819425	-13.1397	-15.6677
2012-12-09 22:51:08	12.96	15.43	20.74	0.826369		0.826369	-13.211	-15.7288
2012-12-09 23:01:08	13.04	15.52	20.74	0.833313		0.833313	-13.2926	-15.8206
2012-12-09 23:11:08	13	15.47	20.73	0.840258		0.840258	-13.2518	-15.7696
2012-12-09 23:21:08	13.1	15.58	20.73	0.847202		0.847202	-13.3537	-15.8818
2012-12-09 23:31:08	13.16	15.62	20.73	0.854147	41253	0.854147	-13.4149	-15.9225
2012-12-09 23:41:08	13.14	15.6	20.73	0.861091		0.861091	-13.3945	-15.9021
2012-12-09 23:51:08	13.28	15.75	20.73	0.868036		0.868036	-13.5372	-16.055
2012-12-10 00:01:08	13.27	15.72	20.73	0.87498		0.87498	-13.527	-16.0245
2012-12-10 00:11:08	13.37	15.83	20.72	0.881925		0.881925	-13.629	-16.1366
2012-12-10 00:21:08	13.45	15.91	20.72	0.888869		0.888869	-13.7105	-16.2181
2012-12-10 00:31:08	13.53	15.98	20.72	0.895813	41253	0.895813	-13.792	-16.2895
2012-12-10 00:41:08	13.59	16.05	20.72	0.902758		0.902758	-13.8532	-16.3609
2012-12-10 00:51:08	13.63	16.09	20.72	0.909702		0.909702	-13.894	-16.4016
2012-12-10 01:01:08	13.71	16.16	20.72	0.916647		0.916647	-13.9755	-16.473
2012-12-10 01:11:08	13.76	16.21	20.73	0.923591		0.923591	-14.0265	-16.524
2012-12-10 01:21:08	13.83	16.29	20.73	0.930536		0.930536	-14.0979	-16.6055
2012-12-10 01:31:08	13.78	16.24	20.73	0.93748	41253.1	0.93748	-14.0469	-16.5545
2012-12-10 01:41:08	13.84	16.3	20.73	0.944425		0.944425	-14.1081	-16.6157
2012-12-10 01:51:08	13.9	16.36	20.73	0.951369		0.951369	-14.1692	-16.6769
2012-12-10 02:01:08	13.98	16.44	20.73	0.958313		0.958313	-14.2508	-16.7584
2012-12-10 02:11:08	14.07	16.53	20.74	0.965258		0.965258	-14.3425	-16.8502
2012-12-10 02:21:08	14.1	16.55	20.74	0.972202		0.972202	-14.3731	-16.8705
2012-12-10 02:31:08	14.17	16.62	20.74	0.979147	41253.1	0.979147	-14.4444	-16.9419
2012-12-10 02:41:08	14.15	16.62	20.74	0.986091		0.986091	-14.4241	-16.9419
2012-12-10 02:51:08	14.24	16.7	20.74	0.993036		0.993036	-14.5158	-17.0234
2012-12-10 03:01:08	14.29	16.76	20.74	0.99998		0.99998	-14.5668	-17.0846
2012-12-10 03:11:08	14.35	16.81	20.74	1.00692		1.00692	-14.6279	-17.1356
2012-12-10 03:21:08	14.4	16.86	20.74	1.01387		1.01387	-14.6789	-17.1865
2012-12-10 03:31:08	14.44	16.91	20.74	1.02081	41253.1	1.02081	-14.7197	-17.2375
2012-12-10 03:41:08	14.5	16.96	20.74	1.02776		1.02776	-14.7808	-17.2885
2012-12-10 03:51:08	14.56	17.01	20.74	1.0347		1.0347	-14.842	-17.3394
2012-12-10 04:01:08	14.63	17.08	20.74	1.04165		1.04165	-14.9134	-17.4108
2012-12-10 04:11:08	14.7	17.16	20.74	1.04859		1.04859	-14.9847	-17.4924
2012-12-10 04:21:08	14.74	17.2	20.75	1.05554		1.05554	-15.0255	-17.5331
2012-12-10 04:31:08	14.83	17.29	20.75	1.06248	41253.2	1.06248	-15.1172	-17.6249
2012-12-10 04:41:08	14.91	17.37	20.76	1.06942		1.06942	-15.1988	-17.7064
2012-12-10 04:51:08	14.95	17.41	20.76	1.07637		1.07637	-15.2396	-17.7472
2012-12-10 05:01:08	15.05	17.51	20.76	1.08331		1.08331	-15.3415	-17.8491
2012-12-10 05:11:08	15.08	17.54	20.77	1.09026		1.09026	-15.3721	-17.8797
2012-12-10 05:21:08	15.14	17.59	20.78	1.0972		1.0972	-15.4332	-17.9307
2012-12-10 05:31:08	15.08	17.54	20.78	1.10415	41253.2	1.10415	-15.3721	-17.8797
2012-12-10 05:41:08	15.15	17.61	20.79	1.11109		1.11109	-15.4434	-17.9511
2012-12-10 05:51:08	15.23	17.69	20.79	1.11804		1.11804	-15.525	-18.0326
2012-12-10 06:01:08	15.27	17.72	20.8	1.12498		1.12498	-15.5657	-18.0632
2012-12-10 06:11:08	15.35	17.8	20.8	1.13192		1.13192	-15.6473	-18.1448
2012-12-10 06:21:08	15.42	17.88	20.81	1.13887		1.13887	-15.7187	-18.2263
2012-12-10 06:31:08	15.44	17.9	20.82	1.14581	41253.3	1.14581	-15.739	-18.2467
2012-12-10 06:41:08	15.49	17.95	20.82	1.15276		1.15276	-15.79	-18.2977
2012-12-10 06:51:08	15.55	18	20.83	1.1597		1.1597	-15.8512	-18.3486
2012-12-10 07:01:08	15.61	18.06	20.84	1.16665		1.16665	-15.9123	-18.4098
2012-12-10 07:11:08	15.7	18.15	20.85	1.17359		1.17359	-16.0041	-18.5015
2012-12-10 07:21:08	15.68	18.13	20.85	1.18054		1.18054	-15.9837	-18.4811
2012-12-10 07:31:08	15.78	18.22	20.86	1.18748	41253.3	1.18748	-16.0856	-18.5729
2012-12-10 07:41:08	15.83	18.28	20.87	1.19442		1.19442	-16.1366	-18.634
2012-12-10 07:51:08	15.64	18.1	20.88	1.20137		1.20137	-15.9429	-18.4506
2012-12-10 08:01:08	15.74	18.2	20.88	1.20831		1.20831	-16.0449	-18.5525
2012-12-10 08:11:08	15.85	18.3	20.89	1.21526		1.21526	-16.157	-18.6544
2012-12-10 08:21:08	15.89	18.34	20.9	1.2222		1.2222	-16.1978	-18.6952
2012-12-10 08:31:08	15.95	18.39	20.91	1.22915	41253.4	1.22915	-16.2589	-18.7462
2012-12-10 08:41:08	15.97	18.42	20.93	1.23609		1.23609	-16.2793	-18.7768
2012-12-10 08:51:08	16.02	18.45	20.95	1.24304		1.24304	-16.3303	-18.8073
2012-12-10 09:01:08	16.02	18.46	20.97	1.24998		1.24998	-16.3303	-18.8175
2012-12-10 09:11:08	16.1	18.54	20.98	1.25692		1.25692	-16.4118	-18.8991
2012-12-10 09:21:08	16.15	18.59	21	1.26387		1.26387	-16.4628	-18.9501
2012-12-10 09:31:08	15.92	18.37	21.01	1.27081	41253.4	1.27081	-16.2283	-18.7258
2012-12-10 09:41:08	16.1	18.53	21.05	1.27776		1.27776	-16.4118	-18.8889
2012-12-10 09:51:08	16.16	18.59	21.07	1.2847		1.2847	-16.473	-18.9501
2012-12-10 10:01:08	16.23	18.66	21.08	1.29165		1.29165	-16.5443	-19.0214
2012-12-10 10:11:08	16.25	18.7	21.08	1.29859		1.29859	-16.5647	-19.0622
2012-12-10 10:21:08	16.34	18.77	21.08	1.30554		1.30554	-16.6565	-19.1335
2012-12-10 10:31:08	16.43	18.88	21.07	1.31248	41253.4	1.31248	-16.7482	-19.2457
2012-12-10 10:41:08	16.43	18.87	21.1	1.31942		1.31942	-16.7482	-19.2355
2012-12-10 10:51:08	16.46	18.88	21.14	1.32637		1.32637	-16.7788	-19.2457
2012-12-10 11:01:08	16.46	18.9	21.17	1.33331		1.33331	-16.7788	-19.2661
2012-12-10 11:11:08	16.51	18.93	21.18	1.34026		1.34026	-16.8298	-19.2966
2012-12-10 11:21:08	16.53	18.96	21.2	1.3472		1.3472	-16.8502	-19.3272
2012-12-10 11:31:08	16.62	19.04	21.21	1.35415	41253.5	1.35415	-16.9419	-19.4088
2012-12-10 11:41:08	16.66	19.1	21.23	1.36109		1.36109	-16.9827	-19.4699
2012-12-10 11:51:08	16.72	19.16	21.24	1.36804		1.36804	-17.0438	-19.5311
2012-12-10 12:01:08	16.76	19.18	21.26	1.37498		1.37498	-17.0846	-19.5515
2012-12-10 12:11:08	16.83	19.25	21.27	1.38192		1.38192	-17.156	-19.6228
2012-12-10 12:21:08	16.84	19.27	21.29	1.38887		1.38887	-17.1662	-19.6432
2012-12-10 12:31:08	16.87	19.29	21.3	1.39581	41253.5	1.39581	-17.1967	-19.6636
2012-12-10 12:41:08	16.91	19.34	21.31	1.40276		1.40276	-17.2375	-19.7146
2012-12-10 12:51:08	16.95	19.38	21.31	1.4097		1.4097	-17.2783	-19.7554
2012-12-10 13:01:08	17.04	19.44	21.31	1.41665		1.41665	-17.37	-19.8165
2012-12-10 13:08:40	17.07	19.49	21.29	1.42188		1.42188	-17.4006	-19.8675
2012-12-10 13:09:40	17.08	19.51	21.29	1.42258		1.42258	-17.4108	-19.8879
2012-12-10 13:10:40	17.07	19.48	21.29	1.42327	41253.5	1.42327	-17.4006	-19.8573
2012-12-10 13:11:40	17.05	19.52	21.29	1.42397		1.42397	-17.3802	-19.8981
2012-12-10 13:12:40	17.06	19.48	21.29	1.42466		1.42466	-17.3904	-19.8573
2012-12-10 13:13:40	17.04	19.47	21.29	1.42535		1.42535	-17.37	-19.8471
2012-12-10 13:14:40	17.04	19.47	21.29	1.42605		1.42605	-17.37	-19.8471
2012-12-10 13:15:40	17.06	19.5	21.29	1.42674		1.42674	-17.3904	-19.8777
2012-12-10 13:16:40	17.05	19.47	21.29	1.42744	41253.6	1.42744	-17.3802	-19.8471
2012-12-10 13:17:40	17.05	19.48	21.29	1.42813		1.42813	-17.3802	-19.8573
2012-12-10 13:18:40	17.05	19.45	21.29	1.42883		1.42883	-17.3802	-19.8267
2012-12-10 13:19:40	17.07	19.5	21.29	1.42952		1.42952	-17.4006	-19.8777
2012-12-10 13:20:40	17.02	19.43	21.29	1.43022		1.43022	-17.3496	-19.8063
2012-12-10 13:21:40	17.02	19.44	21.29	1.43091		1.43091	-17.3496	-19.8165
2012-12-10 13:22:40	17.02	19.45	21.29	1.4316	41253.6	1.4316	-17.3496	-19.8267
2012-12-10 13:23:40	17.05	19.46	21.29	1.4323		1.4323	-17.3802	-19.8369
2012-12-10 13:24:40	17.08	19.48	21.29	1.43299		1.43299	-17.4108	-19.8573
2012-12-10 13:25:40	17.04	19.46	21.29	1.43369		1.43369	-17.37	-19.8369
2012-12-10 13:26:40	17.05	19.47	21.3	1.43438		1.43438	-17.3802	-19.8471
2012-12-10 13:27:40	17.06	19.48	21.29	1.43508		1.43508	-17.3904	-19.8573
2012-12-10 13:28:40	17.06	19.48	21.3	1.43577	41253.6	1.43577	-17.3904	-19.8573
2012-12-10 13:29:40	17.08	19.5	21.3	1.43647		1.43647	-17.4108	-19.8777
2012-12-10 13:30:40	17.07	19.5	21.3	1.43716		1.43716	-17.4006	-19.8777
2012-12-10 13:31:40	17.09	19.51	21.3	1.43785		1.43785	-17.421	-19.8879
2012-12-10 13:32:40	17.09	19.52	21.3	1.43855		1.43855	-17.421	-19.8981
2012-12-10 13:33:40	17.09	19.51	21.3	1.43924		1.43924	-17.421	-19.8879
2012-12-10 13:34:40	17.11	19.53	21.3	1.43994	41253.6	1.43994	-17.4414	-19.9083
2012-12-10 13:35:40	17.1	19.52	21.3	1.44063		1.44063	-17.4312	-19.8981
2012-12-10 13:36:40	17.13	19.54	21.3	1.44133		1.44133	-17.4618	-19.9185
2012-12-10 13:37:40	17.11	19.53	21.3	1.44202		1.44202	-17.4414	-19.9083
2012-12-10 13:38:40	17.16	19.56	21.3	1.44272		1.44272	-17.4924	-19.9388
2012-12-10 13:39:40	17.15	19.58	21.3	1.44341		1.44341	-17.4822	-19.9592
2012-12-10 13:40:40	17.15	19.57	21.3	1.4441	41253.6	1.4441	-17.4822	-19.949
2012-12-10 13:41:40	17.15	19.58	21.3	1.4448		1.4448	-17.4822	-19.9592
2012-12-10 13:42:40	17.14	19.57	21.31	1.44549		1.44549	-17.472	-19.949
2012-12-10 13:43:40	17.16	19.56	21.31	1.44619		1.44619	-17.4924	-19.9388
2012-12-10 13:44:40	17.14	19.57	21.31	1.44688		1.44688	-17.472	-19.949
2012-12-10 13:45:40	17.16	19.58	21.31	1.44758		1.44758	-17.4924	-19.9592
2012-12-10 13:46:40	17.17	19.61	21.31	1.44827	41253.6	1.44827	-17.5025	-19.9898
2012-12-10 13:47:40	17.15	19.59	21.31	1.44897		1.44897	-17.4822	-19.9694
2012-12-10 13:48:40	17.17	19.58	21.31	1.44966		1.44966	-17.5025	-19.9592
2012-12-10 13:49:40	17.19	19.6	21.31	1.45035		1.45035	-17.5229	-19.9796
2012-12-10 13:50:40	17.2	19.62	21.31	1.45105		1.45105	-17.5331	-20
2012-12-10 13:51:40	17.19	19.62	21.31	1.45174		1.45174	-17.5229	-20
2012-12-10 13:52:40	17.18	19.61	21.31	1.45244	41253.6	1.45244	-17.5127	-19.9898
2012-12-10 13:53:40	17.19	19.61	21.31	1.45313		1.45313	-17.5229	-19.9898
2012-12-10 13:54:40	17.21	19.63	21.31	1.45383		1.45383	-17.5433	-20.0102
2012-12-10 13:55:40	17.22	19.63	21.31	1.45452		1.45452	-17.5535	-20.0102
2012-12-10 13:56:40	17.21	19.6	21.31	1.45522		1.45522	-17.5433	-19.9796
2012-12-10 13:57:40	17.2	19.6	21.31	1.45591		1.45591	-17.5331	-19.9796
2012-12-10 13:58:40	17.24	19.66	21.31	1.4566	41253.6	1.4566	-17.5739	-20.0408
2012-12-10 13:59:40	17.21	19.66	21.31	1.4573		1.4573	-17.5433	-20.0408
2012-12-10 14:00:40	17.21	19.65	21.31	1.45799		1.45799	-17.5433	-20.0306
2012-12-10 14:01:40	17.23	19.65	21.32	1.45869		1.45869	-17.5637	-20.0306
2012-12-10 14:02:40	17.25	19.66	21.32	1.45938		1.45938	-17.5841	-20.0408
2012-12-10 14:03:40	17.26	19.67	21.32	1.46008		1.46008	-17.5943	-20.051
2012-12-10 14:04:40	17.25	19.67	21.32	1.46077	41253.6	1.46077	-17.5841	-20.051
2012-12-10 14:05:40	17.17	19.6	21.32	1.46147		1.46147	-17.5025	-19.9796
2012-12-10 14:06:40	17.21	19.63	21.32	1.46216		1.46216	-17.5433	-20.0102
2012-12-10 14:07:40	17.23	19.64	21.32	1.46285		1.46285	-17.5637	-20.0204
2012-12-10 14:08:40	17.23	19.65	21.32	1.46355		1.46355	-17.5637	-20.0306
2012-12-10 14:18:40	17.28	19.7	21.32	1.47049		1.47049	-17.6147	-20.0815
2012-12-10 14:28:40	17.34	19.76	21.31	1.47744	41253.6	1.47744	-17.6758	-20.1427
2012-12-10 14:38:40	17.38	19.81	21.31	1.48438		1.48438	-17.7166	-20.1937
2012-12-10 14:48:40	17.44	19.86	21.3	1.49133		1.49133	-17.7778	-20.2446
2012-12-10 14:58:40	17.39	19.81	21.29	1.49827		1.49827	-17.7268	-20.1937
2012-12-10 15:08:40	17.5	19.93	21.29	1.50522		1.50522	-17.8389	-20.316
2012-12-10 15:18:40	17.51	19.93	21.28	1.51216		1.51216	-17.8491	-20.316
2012-12-10 15:28:40	17.58	19.98	21.27	1.5191	41253.6	1.5191	-17.9205	-20.367
2012-12-10 15:38:40	17.58	20.03	21.26	1.52605		1.52605	-17.9205	-20.4179
2012-12-10 15:48:40	17.65	20.08	21.25	1.53299		1.53299	-17.9918	-20.4689
2012-12-10 15:58:40	17.68	20.1	21.24	1.53994		1.53994	-18.0224	-20.4893
2012-12-10 16:08:40	17.72	20.16	21.23	1.54688		1.54688	-18.0632	-20.5505
2012-12-10 16:18:40	17.41	19.85	21.22	1.55383		1.55383	-17.7472	-20.2345
2012-12-10 16:28:40	17.66	20.11	21.22	1.56077	41253.7	1.56077	-18.002	-20.4995
2012-12-10 16:38:40	17.79	20.22	21.21	1.56772		1.56772	-18.1346	-20.6116
2012-12-10 16:48:40	17.78	20.22	21.2	1.57466		1.57466	-18.1244	-20.6116
2012-12-10 16:58:40	17.88	20.32	21.19	1.5816		1.5816	-18.2263	-20.7136
2012-12-10 17:08:40	17.86	20.3	21.18	1.58855		1.58855	-18.2059	-20.6932
2012-12-10 17:18:40	17.95	20.38	21.17	1.59549		1.59549	-18.2977	-20.7747
2012-12-10 17:28:40	17.95	20.39	21.16	1.60244	41253.7	1.60244	-18.2977	-20.7849
2012-12-10 17:38:40	18	20.46	21.15	1.60938		1.60938	-18.3486	-20.8563
2012-12-10 17:48:40	17.09	19.57	21.13	1.61633		1.61633	-17.421	-19.949
2012-12-10 17:58:40	17.32	19.8	21.14	1.62327		1.62327	-17.6555	-20.1835
2012-12-10 18:08:40	17.52	20.02	21.14	1.63022		1.63022	-17.8593	-20.4077
2012-12-10 18:18:40	17.7	20.18	21.13	1.63716		1.63716	-18.0428	-20.5708
2012-12-10 18:28:40	17.84	20.33	21.13	1.6441	41253.8	1.6441	-18.1855	-20.7238
2012-12-10 18:38:40	17.96	20.45	21.12	1.65105		1.65105	-18.3078	-20.8461
2012-12-10 18:48:40	18.05	20.54	21.11	1.65799		1.65799	-18.3996	-20.9378
2012-12-10 18:58:40	18.08	20.57	21.09	1.66494		1.66494	-18.4302	-20.9684
2012-12-10 19:08:40	18.18	20.66	21.08	1.67188		1.67188	-18.5321	-21.0601
2012-12-10 19:18:40	18.24	20.74	21.07	1.67883		1.67883	-18.5933	-21.1417
2012-12-10 19:28:40	18.29	20.78	21.06	1.68577	41253.8	1.68577	-18.6442	-21.1825
2012-12-10 19:38:40	18.37	20.86	21.04	1.69272		1.69272	-18.7258	-21.264
2012-12-10 19:48:40	18.41	20.89	21.03	1.69966		1.69966	-18.7666	-21.2946
2012-12-10 19:58:40	18.47	20.96	21.01	1.7066		1.7066	-18.8277	-21.366
2012-12-10 20:08:40	18.48	20.98	21	1.71355		1.71355	-18.8379	-21.3863
2012-12-10 20:18:40	18.48	20.97	20.99	1.72049		1.72049	-18.8379	-21.3761
2012-12-10 20:28:40	18.61	21.1	20.97	1.72744	41253.9	1.72744	-18.9704	-21.5087
2012-12-10 20:38:40	18.46	20.95	20.96	1.73438		1.73438	-18.8175	-21.3558
2012-12-10 20:48:40	18.61	21.12	20.95	1.74133		1.74133	-18.9704	-21.5291
2012-12-10 20:58:40	18.66	21.16	20.94	1.74827		1.74827	-19.0214	-21.5698
2012-12-10 21:08:40	18.72	21.24	20.92	1.75522		1.75522	-19.0826	-21.6514
2012-12-10 21:18:40	18.77	21.28	20.91	1.76216		1.76216	-19.1335	-21.6922
2012-12-10 21:28:40	18.83	21.34	20.9	1.7691	41253.9	1.7691	-19.1947	-21.7533
2012-12-10 21:38:40	18.88	21.38	20.88	1.77605		1.77605	-19.2457	-21.7941
2012-12-10 21:48:40	18.92	21.43	20.87	1.78299		1.78299	-19.2864	-21.8451
2012-12-10 21:58:40	18.95	21.45	20.86	1.78994		1.78994	-19.317	-21.8654
2012-12-10 22:08:40	18.98	21.5	20.85	1.79688		1.79688	-19.3476	-21.9164
2012-12-10 22:18:40	19.03	21.55	20.84	1.80383		1.80383	-19.3986	-21.9674
2012-12-10 22:28:40	19.09	21.61	20.83	1.81077	41253.9	1.81077	-19.4597	-22.0285
2012-12-10 22:38:40	19.16	21.66	20.82	1.81772		1.81772	-19.5311	-22.0795
2012-12-10 22:48:40	19.22	21.72	20.81	1.82466		1.82466	-19.5923	-22.1407
2012-12-10 22:58:40	19.26	21.78	20.8	1.8316		1.8316	-19.633	-22.2018
2012-12-10 23:08:40	19.29	21.82	20.79	1.83855		1.83855	-19.6636	-22.2426
2012-12-10 23:18:40	19.33	21.8	20.78	1.84549		1.84549	-19.7044	-22.2222
2012-12-10 23:28:40	19.38	21.85	20.81	1.85244	41254	1.85244	-19.7554	-22.2732
2012-12-10 23:38:40	19.43	21.9	20.82	1.85938		1.85938	-19.8063	-22.3242
2012-12-10 23:48:40	19.44	21.93	20.83	1.86633		1.86633	-19.8165	-22.3547
2012-12-10 23:58:40	19.47	21.94	20.84	1.87327		1.87327	-19.8471	-22.3649
2012-12-11 00:08:40	19.54	22	20.85	1.88022		1.88022	-19.9185	-22.4261
2012-12-11 00:18:40	19.58	22.05	20.86	1.88716		1.88716	-19.9592	-22.4771
2012-12-11 00:28:40	19.58	22.04	20.86	1.8941	41254	1.8941	-19.9592	-22.4669
2012-12-11 00:38:40	19.68	22.14	20.86	1.90105		1.90105	-20.0612	-22.5688
2012-12-11 00:48:40	19.58	22.04	20.86	1.90799		1.90799	-19.9592	-22.4669
2012-12-11 00:58:40	19.67	22.14	20.86	1.91494		1.91494	-20.051	-22.5688
2012-12-11 01:08:40	19.74	22.2	20.86	1.92188		1.92188	-20.1223	-22.63
2012-12-11 01:18:40	19.73	22.18	20.86	1.92883		1.92883	-20.1121	-22.6096
2012-12-11 01:28:40	19.77	22.23	20.85	1.93577	41254.1	1.93577	-20.1529	-22.6606
2012-12-11 01:38:40	19.82	22.27	20.85	1.94272		1.94272	-20.2039	-22.7013
2012-12-11 01:48:40	19.87	22.32	20.84	1.94966		1.94966	-20.2548	-22.7523
2012-12-11 01:58:40	19.93	22.39	20.84	1.9566		1.9566	-20.316	-22.8236
2012-12-11 02:08:40	19.97	22.43	20.83	1.96355		1.96355	-20.3568	-22.8644
2012-12-11 02:18:40	20.03	22.49	20.83	1.97049		1.97049	-20.4179	-22.9256
2012-12-11 02:28:40	20.05	22.51	20.82	1.97744	41254.1	1.97744	-20.4383	-22.946
2012-12-11 02:38:40	20.09	22.54	20.81	1.98438		1.98438	-20.4791	-22.9766
2012-12-11 02:48:40	20.14	22.59	20.81	1.99133		1.99133	-20.5301	-23.0275
2012-12-11 02:58:40	20.17	22.63	20.8	1.99827		1.99827	-20.5607	-23.0683
2012-12-11 03:08:40	20.22	22.67	20.79	2.00522		2.00522	-20.6116	-23.1091
2012-12-11 03:18:40	20.26	22.74	20.79	2.01216		2.01216	-20.6524	-23.1804
2012-12-11 03:28:40	20.29	22.76	20.78	2.0191	41254.1	2.0191	-20.683	-23.2008
2012-12-11 03:38:40	20.35	22.8	20.78	2.02605		2.02605	-20.7441	-23.2416
2012-12-11 03:48:40	20.39	22.86	20.77	2.03299		2.03299	-20.7849	-23.3028
2012-12-11 03:58:40	20.3	22.75	20.76	2.03994		2.03994	-20.6932	-23.1906
2012-12-11 04:08:40	20.41	22.86	20.76	2.04688		2.04688	-20.8053	-23.3028
2012-12-11 04:18:40	20.45	22.91	20.75	2.05383		2.05383	-20.8461	-23.3537
2012-12-11 04:28:40	20.49	22.95	20.75	2.06077	41254.2	2.06077	-20.8869	-23.3945
2012-12-11 04:38:40	20.49	22.96	20.74	2.06772		2.06772	-20.8869	-23.4047
2012-12-11 04:48:40	20.47	22.92	20.74	2.07466		2.07466	-20.8665	-23.3639
2012-12-11 04:58:40	20.53	22.99	20.73	2.0816		2.0816	-20.9276	-23.4353
2012-12-11 05:08:40	20.59	23.05	20.73	2.08855		2.08855	-20.9888	-23.4964
2012-12-11 05:18:40	20.61	23.08	20.73	2.09549		2.09549	-21.0092	-23.527
2012-12-11 05:28:40	20.67	23.14	20.72	2.10244	41254.2	2.10244	-21.0703	-23.5882
2012-12-11 05:38:40	20.74	23.2	20.72	2.10938		2.10938	-21.1417	-23.6493
2012-12-11 05:48:40	20.68	23.13	20.72	2.11633		2.11633	-21.0805	-23.578
2012-12-11 05:58:40	20.76	23.24	20.71	2.12327		2.12327	-21.1621	-23.6901
2012-12-11 06:08:40	20.8	23.26	20.71	2.13022		2.13022	-21.2029	-23.7105
2012-12-11 06:18:40	20.84	23.31	20.7	2.13716		2.13716	-21.2436	-23.7615
2012-12-11 06:28:40	20.86	23.32	20.7	2.1441	41254.3	2.1441	-21.264	-23.7717
2012-12-11 06:38:40	20.79	23.26	20.69	2.15105		2.15105	-21.1927	-23.7105
2012-12-11 06:48:40	20.9	23.36	20.69	2.15799		2.15799	-21.3048	-23.8124
2012-12-11 06:58:40	20.92	23.38	20.69	2.16494		2.16494	-21.3252	-23.8328
2012-12-11 07:08:40	20.95	23.43	20.69	2.17188		2.17188	-21.3558	-23.8838
2012-12-11 07:18:40	20.99	23.45	20.69	2.17883		2.17883	-21.3965	-23.9042
2012-12-11 07:28:40	21.08	23.55	20.68	2.18577	41254.3	2.18577	-21.4883	-24.0061
2012-12-11 07:38:40	21.09	23.56	20.68	2.19272		2.19272	-21.4985	-24.0163
2012-12-11 07:48:40	21.09	23.57	20.67	2.19966		2.19966	-21.4985	-24.0265
2012-12-11 07:58:40	21.11	23.57	20.67	2.2066		2.2066	-21.5189	-24.0265
2012-12-11 08:08:40	21.13	23.58	20.66	2.21355		2.21355	-21.5392	-24.0367
2012-12-11 08:18:40	21.23	23.71	20.66	2.22049		2.22049	-21.6412	-24.1692
2012-12-11 08:28:40	21.27	23.74	20.65	2.22744	41254.4	2.22744	-21.682	-24.1998
2012-12-11 08:38:40	21.31	23.79	20.65	2.23438		2.23438	-21.7227	-24.2508
2012-12-11 08:48:40	21.33	23.79	20.65	2.24133		2.24133	-21.7431	-24.2508
2012-12-11 08:58:40	21.38	23.85	20.66	2.24827		2.24827	-21.7941	-24.3119
2012-12-11 09:08:40	21.4	23.88	20.66	2.25522		2.25522	-21.8145	-24.3425
2012-12-11 09:18:40	21.45	23.93	20.66	2.26216		2.26216	-21.8654	-24.3935
2012-12-11 09:28:40	21.48	23.95	20.67	2.2691	41254.4	2.2691	-21.896	-24.4139
2012-12-11 09:38:40	21.49	23.99	20.67	2.27605		2.27605	-21.9062	-24.4546
2012-12-11 09:48:40	21.5	23.97	20.67	2.28299		2.28299	-21.9164	-24.4343
2012-12-11 09:58:40	21.55	24.02	20.67	2.28994		2.28994	-21.9674	-24.4852
2012-12-11 10:08:40	21.61	24.09	20.67	2.29688		2.29688	-22.0285	-24.5566
2012-12-11 10:18:40	21.54	24.01	20.68	2.30383		2.30383	-21.9572	-24.475
2012-12-11 10:28:40	21.63	24.1	20.68	2.31077	41254.4	2.31077	-22.0489	-24.5668
2012-12-11 10:38:40	21.66	24.14	20.68	2.31772		2.31772	-22.0795	-24.6075
2012-12-11 10:48:40	21.73	24.2	20.68	2.32466		2.32466	-22.1509	-24.6687
2012-12-11 10:58:40	21.77	24.24	20.67	2.3316		2.3316	-22.1916	-24.7095
2012-12-11 11:08:40	21.82	24.3	20.67	2.33855		2.33855	-22.2426	-24.7706
2012-12-11 11:18:40	21.68	24.14	20.66	2.34549		2.34549	-22.0999	-24.6075
2012-12-11 11:28:40	21.8	24.27	20.66	2.35244	41254.5	2.35244	-22.2222	-24.7401
2012-12-11 11:38:40	21.86	24.32	20.65	2.35938		2.35938	-22.2834	-24.791
2012-12-11 11:48:40	21.87	24.35	20.65	2.36633		2.36633	-22.2936	-24.8216
2012-12-11 11:58:40	21.19	23.68	20.64	2.37327		2.37327	-21.6004	-24.1386
2012-12-11 12:08:40	21.44	23.94	20.66	2.38022		2.38022	-21.8552	-24.4037
2012-12-11 12:18:40	21.71	24.15	20.68	2.38716		2.38716	-22.1305	-24.6177
2012-12-11 12:28:40	21.84	24.31	20.68	2.3941	41254.5	2.3941	-22.263	-24.7808
2012-12-11 12:38:40	21.9	24.37	20.69	2.40105		2.40105	-22.3242	-24.842
2012-12-11 12:48:40	21.96	24.42	20.68	2.40799		2.40799	-22.3853	-24.893
2012-12-11 12:58:40	22	24.47	20.68	2.41494		2.41494	-22.4261	-24.9439
2012-12-11 13:08:40	22.06	24.53	20.68	2.42188		2.42188	-22.4873	-25.0051
2012-12-11 13:18:40	22.07	24.54	20.68	2.42883		2.42883	-22.4975	-25.0153
2012-12-11 13:28:40	22.14	24.62	20.67	2.43577	41254.6	2.43577	-22.5688	-25.0968
2012-12-11 13:38:40	22.16	24.63	20.67	2.44272		2.44272	-22.5892	-25.107
2012-12-11 13:48:40	22.2	24.69	20.66	2.44966		2.44966	-22.63	-25.1682
2012-12-11 13:58:40	22.28	24.73	20.65	2.4566		2.4566	-22.7115	-25.209
2012-12-11 14:08:40	22.33	24.8	20.65	2.46355		2.46355	-22.7625	-25.2803
2012-12-11 14:18:40	22.36	24.83	20.64	2.47049		2.47049	-22.7931	-25.3109
2012-12-11 14:28:40	22.41	24.87	20.64	2.47744	41254.6	2.47744	-22.844	-25.3517
2012-12-11 14:38:40	22.45	24.92	20.64	2.48438		2.48438	-22.8848	-25.4027
2012-12-11 14:48:40	22.46	24.93	20.63	2.49133		2.49133	-22.895	-25.4128
2012-12-11 14:58:40	22.53	24.99	20.63	2.49827		2.49827	-22.9664	-25.474
2012-12-11 15:08:40	22.51	24.98	20.63	2.50522		2.50522	-22.946	-25.4638
2012-12-11 15:18:40	22.59	25.06	20.62	2.51216		2.51216	-23.0275	-25.5454
2012-12-11 15:28:40	22.63	25.11	20.62	2.5191	41254.6	2.5191	-23.0683	-25.5963
2012-12-11 15:38:40	22.62	25.1	20.62	2.52605		2.52605	-23.0581	-25.5861
2012-12-11 15:48:40	22.67	25.13	20.61	2.53299		2.53299	-23.1091	-25.6167
2012-12-11 15:58:40	22.72	25.18	20.61	2.53994		2.53994	-23.16	-25.6677
2012-12-11 16:08:40	22.79	25.27	20.6	2.54688		2.54688	-23.2314	-25.7594
2012-12-11 16:18:40	22.8	25.26	20.59	2.55383		2.55383	-23.2416	-25.7492
2012-12-11 16:28:40	22.85	25.32	20.59	2.56077	41254.7	2.56077	-23.2926	-25.8104
2012-12-11 16:38:40	22.9	25.37	20.58	2.56772		2.56772	-23.3435	-25.8614
2012-12-11 16:48:40	22.93	25.41	20.58	2.57466		2.57466	-23.3741	-25.9021
2012-12-11 16:58:40	22.97	25.46	20.58	2.5816		2.5816	-23.4149	-25.9531
2012-12-11 17:08:40	22.48	24.99	20.58	2.58855		2.58855	-22.9154	-25.474
2012-12-11 17:18:40	22.38	24.86	20.61	2.59549		2.59549	-22.8135	-25.3415
2012-12-11 17:28:40	22.61	25.1	20.68	2.60244	41254.7	2.60244	-23.0479	-25.5861
2012-12-11 17:38:40	22.77	25.26	20.71	2.60938		2.60938	-23.211	-25.7492
2012-12-11 17:48:40	22.87	25.35	20.77	2.61633		2.61633	-23.3129	-25.841
2012-12-11 17:58:40	22.91	25.37	20.81	2.62327		2.62327	-23.3537	-25.8614
2012-12-11 18:08:40	22.93	25.44	20.83	2.63022		2.63022	-23.3741	-25.9327
2012-12-11 18:18:40	23.01	25.49	20.84	2.63716		2.63716	-23.4557	-25.9837
2012-12-11 18:28:40	23.06	25.54	20.85	2.6441	41254.8	2.6441	-23.5066	-26.0347
2012-12-11 18:38:40	23.1	25.59	20.85	2.65105		2.65105	-23.5474	-26.0856
2012-12-11 18:48:40	23.01	25.49	20.85	2.65799		2.65799	-23.4557	-25.9837
2012-12-11 18:58:40	23.19	25.66	20.85	2.66494		2.66494	-23.6391	-26.157
2012-12-11 19:08:40	23.23	25.69	20.84	2.67188		2.67188	-23.6799	-26.1876
2012-12-11 19:18:40	23.26	25.72	20.82	2.67883		2.67883	-23.7105	-26.2181
2012-12-11 19:28:40	23.34	25.81	20.81	2.68577	41254.8	2.68577	-23.792	-26.3099
2012-12-11 19:38:40	23.41	25.87	20.8	2.69272		2.69272	-23.8634	-26.371
2012-12-11 19:48:40	23.31	25.81	20.79	2.69966		2.69966	-23.7615	-26.3099
2012-12-11 19:58:40	23.39	25.8	20.78	2.7066		2.7066	-23.843	-26.2997
2012-12-11 20:08:40	23.42	25.9	20.77	2.71355		2.71355	-23.8736	-26.4016
2012-12-11 20:18:40	23.47	25.96	20.75	2.72049		2.72049	-23.9246	-26.4628
2012-12-11 20:28:40	23.33	25.78	20.74	2.72744	41254.9	2.72744	-23.7819	-26.2793
2012-12-11 20:38:40	23.37	25.79	20.72	2.73438		2.73438	-23.8226	-26.2895
2012-12-11 20:48:40	23.16	25.59	20.71	2.74133		2.74133	-23.6086	-26.0856
2012-12-11 20:58:40	23.38	25.82	20.69	2.74827		2.74827	-23.8328	-26.3201
2012-12-11 21:08:40	23.41	25.85	20.67	2.75522		2.75522	-23.8634	-26.3507
2012-12-11 21:18:40	23.47	25.9	20.66	2.76216		2.76216	-23.9246	-26.4016
2012-12-11 21:28:40	23.5	25.94	20.64	2.7691	41254.9	2.7691	-23.9551	-26.4424
2012-12-11 21:38:40	23.53	25.98	20.63	2.77605		2.77605	-23.9857	-26.4832
2012-12-11 21:48:40	23.57	26.02	20.61	2.78299		2.78299	-24.0265	-26.524
2012-12-11 21:58:40	23.6	26.06	20.6	2.78994		2.78994	-24.0571	-26.5647
2012-12-11 22:08:40	23.66	26.11	20.59	2.79688		2.79688	-24.1182	-26.6157
2012-12-11 22:18:40	23.71	26.16	20.57	2.80383		2.80383	-24.1692	-26.6667
2012-12-11 22:28:40	23.75	26.2	20.56	2.81077	41254.9	2.81077	-24.21	-26.7074
2012-12-11 22:38:40	23.81	26.26	20.55	2.81772		2.81772	-24.2712	-26.7686
2012-12-11 22:48:40	23.55	26	20.54	2.82466		2.82466	-24.0061	-26.5036
2012-12-11 22:58:40	23.78	26.23	20.53	2.8316		2.8316	-24.2406	-26.738
2012-12-11 23:08:40	23.85	26.31	20.52	2.83855		2.83855	-24.3119	-26.8196
2012-12-11 23:18:40	23.85	26.3	20.52	2.84549		2.84549	-24.3119	-26.8094
2012-12-11 23:28:40	23.92	26.37	20.51	2.85244	41255	2.85244	-24.3833	-26.8807
2012-12-11 23:38:40	23.85	26.3	20.5	2.85938		2.85938	-24.3119	-26.8094
2012-12-11 23:48:40	23.95	26.41	20.49	2.86633		2.86633	-24.4139	-26.9215
2012-12-11 23:58:40	24	26.46	20.49	2.87327		2.87327	-24.4648	-26.9725
2012-12-12 00:08:40	24.04	26.5	20.48	2.88022		2.88022	-24.5056	-27.0133
2012-12-12 00:18:40	24.09	26.55	20.48	2.88716		2.88716	-24.5566	-27.0642
2012-12-12 00:28:40	24.1	26.58	20.47	2.8941	41255	2.8941	-24.5668	-27.0948
2012-12-12 00:38:40	24.12	26.58	20.46	2.90105		2.90105	-24.5872	-27.0948
2012-12-12 00:48:40	24.16	26.63	20.46	2.90799		2.90799	-24.6279	-27.1458
2012-12-12 00:58:40	24.24	26.68	20.45	2.91494		2.91494	-24.7095	-27.1967
2012-12-12 01:08:40	24.2	26.67	20.45	2.92188		2.92188	-24.6687	-27.1865
2012-12-12 01:18:40	24.27	26.73	20.44	2.92883		2.92883	-24.7401	-27.2477
2012-12-12 01:28:40	24.29	26.75	20.44	2.93577	41255.1	2.93577	-24.7604	-27.2681
2012-12-12 01:38:40	24.35	26.8	20.44	2.94272		2.94272	-24.8216	-27.3191
2012-12-12 01:48:40	24.39	26.86	20.43	2.94966		2.94966	-24.8624	-27.3802
2012-12-12 01:58:40	24.43	26.89	20.43	2.9566		2.9566	-24.9032	-27.4108
2012-12-12 02:08:40	24.49	26.94	20.43	2.96355		2.96355	-24.9643	-27.4618
2012-12-12 02:18:40	24.51	26.97	20.42	2.97049		2.97049	-24.9847	-27.4924
2012-12-12 02:28:40	24.51	26.97	20.42	2.97744	41255.1	2.97744	-24.9847	-27.4924
2012-12-12 02:38:40	24.49	26.96	20.42	2.98438		2.98438	-24.9643	-27.4822
2012-12-12 02:48:40	24.55	27.03	20.41	2.99133		2.99133	-25.0255	-27.5535
2012-12-12 02:58:40	24.61	27.09	20.41	2.99827		2.99827	-25.0866	-27.6147
2012-12-12 03:08:40	24.65	27.13	20.41	3.00522		3.00522	-25.1274	-27.6555
2012-12-12 03:18:40	24.69	27.16	20.41	3.01216		3.01216	-25.1682	-27.686
2012-12-12 03:28:40	24.66	27.13	20.4	3.0191	41255.1	3.0191	-25.1376	-27.6555
2012-12-12 03:38:40	24.75	27.22	20.4	3.02605		3.02605	-25.2294	-27.7472
2012-12-12 03:48:40	24.8	27.27	20.4	3.03299		3.03299	-25.2803	-27.7982
2012-12-12 03:58:40	24.83	27.3	20.4	3.03994		3.03994	-25.3109	-27.8287
2012-12-12 04:08:40	24.88	27.36	20.4	3.04688		3.04688	-25.3619	-27.8899
2012-12-12 04:18:40	24.92	27.39	20.4	3.05383		3.05383	-25.4027	-27.9205
2012-12-12 04:28:40	24.96	27.42	20.4	3.06077	41255.2	3.06077	-25.4434	-27.9511
2012-12-12 04:38:40	25	27.46	20.4	3.06772		3.06772	-25.4842	-27.9918
2012-12-12 04:48:40	25.03	27.51	20.4	3.07466		3.07466	-25.5148	-28.0428
2012-12-12 04:58:40	25.05	27.52	20.4	3.0816		3.0816	-25.5352	-28.053
2012-12-12 05:08:40	25.09	27.57	20.4	3.08855		3.08855	-25.5759	-28.104
2012-12-12 05:18:40	25.13	27.61	20.4	3.09549		3.09549	-25.6167	-28.1448
2012-12-12 05:28:40	25.15	27.61	20.4	3.10244	41255.2	3.10244	-25.6371	-28.1448
2012-12-12 05:38:40	25.22	27.68	20.4	3.10938		3.10938	-25.7085	-28.2161
2012-12-12 05:48:40	25.25	27.72	20.4	3.11633		3.11633	-25.739	-28.2569
2012-12-12 05:58:40	25.29	27.76	20.4	3.12327		3.12327	-25.7798	-28.2977
2012-12-12 06:08:40	25.3	27.77	20.4	3.13022		3.13022	-25.79	-28.3078
2012-12-12 06:18:40	25.33	27.8	20.4	3.13716		3.13716	-25.8206	-28.3384
2012-12-12 06:28:40	25.25	27.71	20.4	3.1441	41255.3	3.1441	-25.739	-28.2467
2012-12-12 06:38:40	25.36	27.83	20.4	3.15105		3.15105	-25.8512	-28.369
2012-12-12 06:48:40	25.38	27.85	20.4	3.15799		3.15799	-25.8716	-28.3894
2012-12-12 06:58:40	25.42	27.89	20.4	3.16494		3.16494	-25.9123	-28.4302
2012-12-12 07:08:40	25.44	27.9	20.4	3.17188		3.17188	-25.9327	-28.4404
2012-12-12 07:18:40	25.44	27.91	20.41	3.17883		3.17883	-25.9327	-28.4506
2012-12-12 07:28:40	25.47	27.94	20.41	3.18577	41255.3	3.18577	-25.9633	-28.4811
2012-12-12 07:38:40	25.54	27.99	20.41	3.19272		3.19272	-26.0347	-28.5321
2012-12-12 07:48:40	25.57	28.04	20.42	3.19966		3.19966	-26.0652	-28.5831
2012-12-12 07:58:40	25.61	28.08	20.42	3.2066		3.2066	-26.106	-28.6239
2012-12-12 08:08:40	25.64	28.12	20.43	3.21355		3.21355	-26.1366	-28.6646
2012-12-12 08:18:40	25.69	28.14	20.44	3.22049		3.22049	-26.1876	-28.685
2012-12-12 08:28:40	25.58	28.05	20.45	3.22744	41255.4	3.22744	-26.0754	-28.5933
2012-12-12 08:38:40	25.66	28.14	20.47	3.23438		3.23438	-26.157	-28.685
2012-12-12 08:48:40	25.71	28.18	20.49	3.24133		3.24133	-26.208	-28.7258
2012-12-12 08:58:40	25.75	28.21	20.51	3.24827		3.24827	-26.2487	-28.7564
2012-12-12 09:08:40	25.76	28.23	20.52	3.25522		3.25522	-26.2589	-28.7768
2012-12-12 09:18:40	25.83	28.28	20.53	3.26216		3.26216	-26.3303	-28.8277
2012-12-12 09:28:40	25.24	27.74	20.54	3.2691	41255.4	3.2691	-25.7288	-28.2773
2012-12-12 09:38:40	25.55	28.05	20.58	3.27605		3.27605	-26.0449	-28.5933
2012-12-12 09:48:40	25.78	28.26	20.6	3.28299		3.28299	-26.2793	-28.8073
2012-12-12 09:58:40	25.9	28.41	20.62	3.28994		3.28994	-26.4016	-28.9602
2012-12-12 10:08:40	25.95	28.45	20.63	3.29688		3.29688	-26.4526	-29.001
2012-12-12 10:18:40	26	28.5	20.64	3.30383		3.30383	-26.5036	-29.052
2012-12-12 10:28:40	26.02	28.53	20.65	3.31077	41255.4	3.31077	-26.524	-29.0826
2012-12-12 10:38:40	26.08	28.57	20.66	3.31772		3.31772	-26.5851	-29.1233
2012-12-12 10:48:40	26.12	28.61	20.67	3.32466		3.32466	-26.6259	-29.1641
2012-12-12 10:58:40	26.16	28.65	20.69	3.3316		3.3316	-26.6667	-29.2049
2012-12-12 11:08:40	26.18	28.67	20.71	3.33855		3.33855	-26.6871	-29.2253
2012-12-12 11:18:40	26.22	28.71	20.73	3.34549		3.34549	-26.7278	-29.2661
2012-12-12 11:28:40	26.24	28.72	20.76	3.35244	41255.5	3.35244	-26.7482	-29.2762
2012-12-12 11:38:40	26.26	28.75	20.79	3.35938		3.35938	-26.7686	-29.3068
2012-12-12 11:48:40	26.21	28.68	20.81	3.36633		3.36633	-26.7176	-29.2355
2012-12-12 11:58:40	26.28	28.75	20.83	3.37327		3.37327	-26.789	-29.3068
2012-12-12 12:08:40	26.32	28.8	20.85	3.38022		3.38022	-26.8298	-29.3578
2012-12-12 12:18:40	26.33	28.8	20.86	3.38716		3.38716	-26.84	-29.3578
2012-12-12 12:28:40	26.39	28.86	20.87	3.3941	41255.5	3.3941	-26.9011	-29.419
2012-12-12 12:38:40	26.4	28.88	20.88	3.40105		3.40105	-26.9113	-29.4393
2012-12-12 12:48:40	26.46	28.92	20.88	3.40799		3.40799	-26.9725	-29.4801
2012-12-12 12:58:40	26.48	28.95	20.89	3.41494		3.41494	-26.9929	-29.5107
2012-12-12 13:08:40	26.52	28.99	20.89	3.42188		3.42188	-27.0336	-29.5515
2012-12-12 13:18:40	26.55	29.02	20.89	3.42883		3.42883	-27.0642	-29.5821
2012-12-12 13:28:40	26.57	29.06	20.89	3.43577	41255.6	3.43577	-27.0846	-29.6228
2012-12-12 13:38:40	26.64	29.1	20.88	3.44272		3.44272	-27.156	-29.6636
2012-12-12 13:48:40	26.68	29.15	20.88	3.44966		3.44966	-27.1967	-29.7146
2012-12-12 13:58:40	26.71	29.18	20.88	3.4566		3.4566	-27.2273	-29.7452
2012-12-12 14:08:40	26.71	29.17	20.88	3.46355		3.46355	-27.2273	-29.735
2012-12-12 14:18:40	26.57	29.04	20.88	3.47049		3.47049	-27.0846	-29.6024
2012-12-12 14:28:40	26.7	29.17	20.88	3.47744	41255.6	3.47744	-27.2171	-29.735
2012-12-12 14:38:40	26.75	29.22	20.88	3.48438		3.48438	-27.2681	-29.7859
2012-12-12 14:48:40	26.79	29.26	20.88	3.49133		3.49133	-27.3089	-29.8267
2012-12-12 14:58:40	26.81	29.28	20.88	3.49827		3.49827	-27.3293	-29.8471
2012-12-12 15:08:40	26.85	29.3	20.89	3.50522		3.50522	-27.37	-29.8675
2012-12-12 15:18:40	26.87	29.34	20.9	3.51216		3.51216	-27.3904	-29.9083
2012-12-12 15:28:40	26.93	29.39	20.91	3.5191	41255.6	3.5191	-27.4516	-29.9592
2012-12-12 15:38:40	26.96	29.44	20.91	3.52605		3.52605	-27.4822	-30.0102
2012-12-12 15:48:40	26.99	29.47	20.92	3.53299		3.53299	-27.5127	-30.0408
2012-12-12 15:58:40	27.02	29.49	20.92	3.53994		3.53994	-27.5433	-30.0612
2012-12-12 16:08:40	27.06	29.52	20.92	3.54688		3.54688	-27.5841	-30.0917
2012-12-12 16:18:40	27.1	29.56	20.92	3.55383		3.55383	-27.6249	-30.1325
2012-12-12 16:28:40	27.12	29.59	20.92	3.56077	41255.7	3.56077	-27.6453	-30.1631
2012-12-12 16:38:40	27.15	29.61	20.92	3.56772		3.56772	-27.6758	-30.1835
2012-12-12 16:48:40	27.18	29.65	20.91	3.57466		3.57466	-27.7064	-30.2243
2012-12-12 16:58:40	27.19	29.66	20.91	3.5816		3.5816	-27.7166	-30.2345
2012-12-12 17:08:40	27.23	29.71	20.91	3.58855		3.58855	-27.7574	-30.2854
2012-12-12 17:18:40	27.27	29.74	20.91	3.59549		3.59549	-27.7982	-30.316
2012-12-12 17:28:40	27.3	29.77	20.91	3.60244	41255.7	3.60244	-27.8287	-30.3466
2012-12-12 17:38:40	27.19	29.65	20.91	3.60938		3.60938	-27.7166	-30.2243
2012-12-12 17:48:40	27.29	29.77	20.93	3.61633		3.61633	-27.8186	-30.3466
2012-12-12 17:58:40	27.36	29.83	20.93	3.62327		3.62327	-27.8899	-30.4077
2012-12-12 18:08:40	27.41	29.88	20.93	3.63022		3.63022	-27.9409	-30.4587
2012-12-12 18:18:40	27.44	29.91	20.93	3.63716		3.63716	-27.9715	-30.4893
2012-12-12 18:28:40	27.48	29.95	20.93	3.6441	41255.8	3.6441	-28.0122	-30.5301
2012-12-12 18:38:40	27.53	30.01	20.93	3.65105		3.65105	-28.0632	-30.5912
2012-12-12 18:48:40	27.57	30.05	20.93	3.65799		3.65799	-28.104	-30.632
2012-12-12 18:58:40	27.64	30.1	20.92	3.66494		3.66494	-28.1753	-30.683
2012-12-12 19:08:40	27.67	30.13	20.92	3.67188		3.67188	-28.2059	-30.7136
2012-12-12 19:18:40	27.72	30.19	20.92	3.67883		3.67883	-28.2569	-30.7747
2012-12-12 19:28:40	27.75	30.23	20.91	3.68577	41255.8	3.68577	-28.2875	-30.8155
2012-12-12 19:38:40	27.8	30.27	20.91	3.69272		3.69272	-28.3384	-30.8563
2012-12-12 19:48:40	27.82	30.29	20.9	3.69966		3.69966	-28.3588	-30.8767
2012-12-12 19:58:40	27.87	30.36	20.89	3.7066		3.7066	-28.4098	-30.948
2012-12-12 20:08:40	27.89	30.36	20.88	3.71355		3.71355	-28.4302	-30.948
2012-12-12 20:18:40	27.92	30.4	20.87	3.72049		3.72049	-28.4608	-30.9888
2012-12-12 20:28:40	27.96	30.44	20.87	3.72744	41255.9	3.72744	-28.5015	-31.0296
2012-12-12 20:38:40	28	30.48	20.86	3.73438		3.73438	-28.5423	-31.0703
2012-12-12 20:48:40	28.03	30.5	20.85	3.74133		3.74133	-28.5729	-31.0907
2012-12-12 20:58:40	28.05	30.54	20.84	3.74827		3.74827	-28.5933	-31.1315
2012-12-12 21:08:40	28.06	30.55	20.83	3.75522		3.75522	-28.6035	-31.1417
2012-12-12 21:18:40	28.11	30.58	20.82	3.76216		3.76216	-28.6544	-31.1723
2012-12-12 21:28:40	28.15	30.63	20.82	3.7691	41255.9	3.7691	-28.6952	-31.2232
2012-12-12 21:38:40	28.13	30.63	20.81	3.77605		3.77605	-28.6748	-31.2232
2012-12-12 21:48:40	28.2	30.7	20.8	3.78299		3.78299	-28.7462	-31.2946
2012-12-12 21:58:40	28.23	30.72	20.79	3.78994		3.78994	-28.7768	-31.315
2012-12-12 22:08:40	28.29	30.78	20.78	3.79688		3.79688	-28.8379	-31.3761
2012-12-12 22:18:40	28.32	30.8	20.78	3.80383		3.80383	-28.8685	-31.3965
2012-12-12 22:28:40	28.35	30.84	20.77	3.81077	41255.9	3.81077	-28.8991	-31.4373
2012-12-12 22:38:40	28.39	30.89	20.76	3.81772		3.81772	-28.9399	-31.4883
2012-12-12 22:48:40	28.39	30.88	20.76	3.82466		3.82466	-28.9399	-31.4781
2012-12-12 22:58:40	28.44	30.94	20.75	3.8316		3.8316	-28.9908	-31.5392
2012-12-12 23:08:40	28.45	30.94	20.74	3.83855		3.83855	-29.001	-31.5392
2012-12-12 23:18:40	28.45	30.94	20.74	3.84549		3.84549	-29.001	-31.5392
2012-12-12 23:28:40	28.51	31	20.73	3.85244	41256	3.85244	-29.0622	-31.6004
2012-12-12 23:38:40	28.58	31.06	20.73	3.85938		3.85938	-29.1335	-31.6616
2012-12-12 23:48:40	28.62	31.1	20.72	3.86633		3.86633	-29.1743	-31.7023
2012-12-12 23:58:40	28.63	31.13	20.72	3.87327		3.87327	-29.1845	-31.7329
2012-12-13 00:08:40	28.63	31.13	20.72	3.88022		3.88022	-29.1845	-31.7329
2012-12-13 00:18:40	28.7	31.2	20.71	3.88716		3.88716	-29.2559	-31.8043
2012-12-13 00:28:40	28.74	31.23	20.71	3.8941	41256	3.8941	-29.2966	-31.8349
2012-12-13 00:38:40	28.78	31.27	20.71	3.90105		3.90105	-29.3374	-31.8756
2012-12-13 00:48:40	28.82	31.33	20.71	3.90799		3.90799	-29.3782	-31.9368
2012-12-13 00:58:40	28.87	31.37	20.7	3.91494		3.91494	-29.4292	-31.9776
2012-12-13 01:08:40	28.89	31.39	20.7	3.92188		3.92188	-29.4495	-31.998
2012-12-13 01:18:40	28.93	31.42	20.7	3.92883		3.92883	-29.4903	-32.0285
2012-12-13 01:28:40	28.97	31.47	20.69	3.93577	41256.1	3.93577	-29.5311	-32.0795
2012-12-13 01:38:40	28.99	31.49	20.69	3.94272		3.94272	-29.5515	-32.0999
2012-12-13 01:48:40	29.03	31.54	20.69	3.94966		3.94966	-29.5923	-32.1509
2012-12-13 01:58:40	29.06	31.56	20.68	3.9566		3.9566	-29.6228	-32.1713
2012-12-13 02:08:40	29.11	31.6	20.68	3.96355		3.96355	-29.6738	-32.212
2012-12-13 02:18:40	29.14	31.63	20.68	3.97049		3.97049	-29.7044	-32.2426
2012-12-13 02:28:40	29.15	31.66	20.68	3.97744	41256.1	3.97744	-29.7146	-32.2732
2012-12-13 02:38:40	29.19	31.69	20.67	3.98438		3.98438	-29.7554	-32.3038
2012-12-13 02:48:40	29.22	31.72	20.67	3.99133		3.99133	-29.7859	-32.3344
2012-12-13 02:58:40	29.27	31.76	20.67	3.99827		3.99827	-29.8369	-32.3751
2012-12-13 03:08:40	29.27	31.78	20.67	4.00522		4.00522	-29.8369	-32.3955
2012-12-13 03:18:40	29.22	31.74	20.67	4.01216		4.01216	-29.7859	-32.3547
2012-12-13 03:28:40	29.31	31.82	20.67	4.0191	41256.1	4.0191	-29.8777	-32.4363
2012-12-13 03:38:40	29.37	31.87	20.67	4.02605		4.02605	-29.9388	-32.4873
2012-12-13 03:48:40	29.4	31.89	20.67	4.03299		4.03299	-29.9694	-32.5076
2012-12-13 03:58:40	29.42	31.93	20.67	4.03994		4.03994	-29.9898	-32.5484
2012-12-13 04:08:40	29.48	31.98	20.67	4.04688		4.04688	-30.051	-32.5994
2012-12-13 04:18:40	29.51	32.01	20.67	4.05383		4.05383	-30.0815	-32.63
2012-12-13 04:28:40	29.5	32.01	20.67	4.06077	41256.2	4.06077	-30.0714	-32.63
2012-12-13 04:38:40	29.58	32.08	20.67	4.06772		4.06772	-30.1529	-32.7013
2012-12-13 04:48:40	29.63	32.13	20.67	4.07466		4.07466	-30.2039	-32.7523
2012-12-13 04:58:40	29.65	32.14	20.67	4.0816		4.0816	-30.2243	-32.7625
2012-12-13 05:08:40	29.69	32.19	20.67	4.08855		4.08855	-30.265	-32.8135
2012-12-13 05:18:40	29.68	32.18	20.67	4.09549		4.09549	-30.2548	-32.8033
2012-12-13 05:28:40	29.75	32.25	20.67	4.10244	41256.2	4.10244	-30.3262	-32.8746
2012-12-13 05:38:40	29.79	32.3	20.67	4.10938		4.10938	-30.367	-32.9256
2012-12-13 05:48:40	29.83	32.34	20.67	4.11633		4.11633	-30.4077	-32.9664
2012-12-13 05:58:40	29.85	32.36	20.67	4.12327		4.12327	-30.4281	-32.9867
2012-12-13 06:08:40	29.88	32.39	20.67	4.13022		4.13022	-30.4587	-33.0173
2012-12-13 06:18:40	29.92	32.42	20.66	4.13716		4.13716	-30.4995	-33.0479
2012-12-13 06:28:40	29.98	32.46	20.66	4.1441	41256.3	4.1441	-30.5607	-33.0887
2012-12-13 06:38:40	30	32.5	20.66	4.15105		4.15105	-30.581	-33.1295
2012-12-13 06:48:40	30.02	32.51	20.66	4.15799		4.15799	-30.6014	-33.1397
2012-12-13 06:58:40	30.06	32.56	20.66	4.16494		4.16494	-30.6422	-33.1906
2012-12-13 07:08:40	30.07	32.57	20.66	4.17188		4.17188	-30.6524	-33.2008
2012-12-13 07:18:40	30.12	32.63	20.66	4.17883		4.17883	-30.7034	-33.262
2012-12-13 07:28:40	30.15	32.66	20.66	4.18577	41256.3	4.18577	-30.7339	-33.2926
2012-12-13 07:38:40	30.19	32.71	20.66	4.19272		4.19272	-30.7747	-33.3435
2012-12-13 07:48:40	30.24	32.75	20.66	4.19966		4.19966	-30.8257	-33.3843
2012-12-13 07:58:40	30.3	32.8	20.67	4.2066		4.2066	-30.8869	-33.4353
2012-12-13 08:08:40	30.33	32.83	20.67	4.21355		4.21355	-30.9174	-33.4659
2012-12-13 08:18:40	30.38	32.88	20.67	4.22049		4.22049	-30.9684	-33.5168
2012-12-13 08:28:40	30.41	32.91	20.68	4.22744	41256.4	4.22744	-30.999	-33.5474
2012-12-13 08:38:40	30.45	32.96	20.68	4.23438		4.23438	-31.0398	-33.5984
2012-12-13 08:48:40	30.49	32.97	20.68	4.24133		4.24133	-31.0805	-33.6086
2012-12-13 08:58:40	30.54	33.05	20.69	4.24827		4.24827	-31.1315	-33.6901
2012-12-13 09:08:40	30.56	33.05	20.69	4.25522		4.25522	-31.1519	-33.6901
2012-12-13 09:18:40	30.59	33.09	20.69	4.26216		4.26216	-31.1825	-33.7309
2012-12-13 09:28:40	30.65	33.15	20.69	4.2691	41256.4	4.2691	-31.2436	-33.792
2012-12-13 09:38:40	30.69	33.19	20.69	4.27605		4.27605	-31.2844	-33.8328
2012-12-13 09:48:40	30.7	33.21	20.7	4.28299		4.28299	-31.2946	-33.8532
2012-12-13 09:58:40	30.45	32.94	20.69	4.28994		4.28994	-31.0398	-33.578
2012-12-13 10:08:40	30.66	33.17	20.71	4.29688		4.29688	-31.2538	-33.8124
2012-12-13 10:18:40	30.72	33.21	20.73	4.30383		4.30383	-31.315	-33.8532
2012-12-13 10:28:40	30.77	33.26	20.73	4.31077	41256.4	4.31077	-31.366	-33.9042
2012-12-13 10:38:40	30.81	33.31	20.74	4.31772		4.31772	-31.4067	-33.9551
2012-12-13 10:48:40	30.82	33.32	20.74	4.32466		4.32466	-31.4169	-33.9653
2012-12-13 10:58:40	30.86	33.36	20.75	4.3316		4.3316	-31.4577	-34.0061
2012-12-13 11:08:40	30.94	33.44	20.75	4.33855		4.33855	-31.5392	-34.0877
2012-12-13 11:18:40	30.97	33.47	20.76	4.34549		4.34549	-31.5698	-34.1182
2012-12-13 11:28:40	31.02	33.5	20.77	4.35244	41256.5	4.35244	-31.6208	-34.1488
2012-12-13 11:38:40	31.06	33.56	20.77	4.35938		4.35938	-31.6616	-34.21
2012-12-13 11:48:40	31.08	33.57	20.78	4.36633		4.36633	-31.682	-34.2202
2012-12-13 11:58:40	31.13	33.62	20.79	4.37327		4.37327	-31.7329	-34.2712
2012-12-13 12:08:40	31.19	33.67	20.79	4.38022		4.38022	-31.7941	-34.3221
2012-12-13 12:18:40	31.2	33.68	20.8	4.38716		4.38716	-31.8043	-34.3323
2012-12-13 12:28:40	31.24	33.73	20.81	4.3941	41256.5	4.3941	-31.8451	-34.3833
2012-12-13 12:38:40	31.28	33.75	20.81	4.40105		4.40105	-31.8858	-34.4037
2012-12-13 12:48:40	31.35	33.83	20.82	4.40799		4.40799	-31.9572	-34.4852
2012-12-13 12:58:40	31.04	33.51	20.85	4.41494		4.41494	-31.6412	-34.159
2012-12-13 13:08:40	31.15	33.62	20.9	4.42188		4.42188	-31.7533	-34.2712
2012-12-13 13:18:40	31.22	33.68	20.99	4.42883		4.42883	-31.8247	-34.3323
2012-12-13 13:28:40	31.29	33.74	21.06	4.43577	41256.6	4.43577	-31.896	-34.3935
2012-12-13 13:38:40	31.37	33.8	21.11	4.44272		4.44272	-31.9776	-34.4546
2012-12-13 13:48:40	31.4	33.84	21.15	4.44966		4.44966	-32.0082	-34.4954
2012-12-13 13:58:40	31.43	33.87	21.18	4.4566		4.4566	-32.0387	-34.526
2012-12-13 14:08:40	31.38	33.82	21.21	4.46355		4.46355	-31.9878	-34.475
2012-12-13 14:18:40	31.45	33.88	21.23	4.47049		4.47049	-32.0591	-34.5362
2012-12-13 14:28:40	31.5	33.94	21.25	4.47744	41256.6	4.47744	-32.1101	-34.5973
2012-12-13 14:38:40	31.51	33.94	21.27	4.48438		4.48438	-32.1203	-34.5973
2012-12-13 14:48:40	31.6	34.04	21.27	4.49133		4.49133	-32.212	-34.6993
2012-12-13 14:58:40	31.65	34.08	21.27	4.49827		4.49827	-32.263	-34.7401
2012-12-13 15:08:40	31.66	34.09	21.27	4.50522		4.50522	-32.2732	-34.7503
2012-12-13 15:18:40	31.53	33.91	21.26	4.51216		4.51216	-32.1407	-34.5668
2012-12-13 15:28:40	31.57	33.96	21.25	4.5191	41256.6	4.5191	-32.1814	-34.6177
2012-12-13 15:38:40	31.58	33.96	21.24	4.52605		4.52605	-32.1916	-34.6177
2012-12-13 15:48:40	31.66	34.04	21.22	4.53299		4.53299	-32.2732	-34.6993
2012-12-13 15:58:40	31.71	34.08	21.21	4.53994		4.53994	-32.3242	-34.7401
2012-12-13 16:08:40	31.76	34.15	21.2	4.54688		4.54688	-32.3751	-34.8114
2012-12-13 16:18:40	31.81	34.2	21.18	4.55383		4.55383	-32.4261	-34.8624
2012-12-13 16:28:40	31.88	34.27	21.17	4.56077	41256.7	4.56077	-32.4975	-34.9337
2012-12-13 16:38:40	31.92	34.32	21.15	4.56772		4.56772	-32.5382	-34.9847
2012-12-13 16:48:40	31.98	34.38	21.13	4.57466		4.57466	-32.5994	-35.0459
2012-12-13 16:58:40	32.05	34.45	21.11	4.5816		4.5816	-32.6707	-35.1172
2012-12-13 17:08:40	32.11	34.5	21.1	4.58855		4.58855	-32.7319	-35.1682
2012-12-13 17:18:40	32.16	34.55	21.08	4.59549		4.59549	-32.7829	-35.2192
2012-12-13 17:28:40	32.23	34.63	21.06	4.60244	41256.7	4.60244	-32.8542	-35.3007
2012-12-13 17:38:40	32.27	34.68	21.04	4.60938		4.60938	-32.895	-35.3517
2012-12-13 17:48:40	32.34	34.75	21.02	4.61633		4.61633	-32.9664	-35.423
2012-12-13 17:58:40	32.4	34.8	21	4.62327		4.62327	-33.0275	-35.474
2012-12-13 18:08:40	32.45	34.87	20.98	4.63022		4.63022	-33.0785	-35.5454
2012-12-13 18:18:40	32.53	34.94	20.96	4.63716		4.63716	-33.16	-35.6167
2012-12-13 18:28:40	32.58	35.01	20.95	4.6441	41256.8	4.6441	-33.211	-35.6881
2012-12-13 18:38:40	32.64	35.06	20.93	4.65105		4.65105	-33.2722	-35.739
2012-12-13 18:48:40	32.69	35.11	20.91	4.65799		4.65799	-33.3231	-35.79
2012-12-13 18:58:40	32.74	35.16	20.89	4.66494		4.66494	-33.3741	-35.841
2012-12-13 19:08:40	32.78	35.21	20.87	4.67188		4.67188	-33.4149	-35.8919
2012-12-13 19:18:40	32.84	35.31	20.85	4.67883		4.67883	-33.476	-35.9939
2012-12-13 19:28:40	32.91	35.32	20.83	4.68577	41256.8	4.68577	-33.5474	-36.0041
2012-12-13 19:38:40	32.96	35.39	20.81	4.69272		4.69272	-33.5984	-36.0754
2012-12-13 19:48:40	33.02	35.46	20.79	4.69966		4.69966	-33.6595	-36.1468
2012-12-13 19:58:40	33.09	35.51	20.77	4.7066		4.7066	-33.7309	-36.1978
2012-12-13 20:08:40	33.14	35.56	20.75	4.71355		4.71355	-33.7819	-36.2487
2012-12-13 20:18:40	33.18	35.62	20.74	4.72049		4.72049	-33.8226	-36.3099
2012-12-13 20:28:40	33.26	35.7	20.72	4.72744	41256.9	4.72744	-33.9042	-36.3914
2012-12-13 20:38:40	33.32	35.75	20.7	4.73438		4.73438	-33.9653	-36.4424
2012-12-13 20:48:40	33.37	35.82	20.69	4.74133		4.74133	-34.0163	-36.5138
2012-12-13 20:58:40	33.43	35.87	20.68	4.74827		4.74827	-34.0775	-36.5647
2012-12-13 21:08:40	33.49	35.92	20.66	4.75522		4.75522	-34.1386	-36.6157
2012-12-13 21:18:40	33.53	35.98	20.65	4.76216		4.76216	-34.1794	-36.6769
2012-12-13 21:28:40	33.59	36.04	20.64	4.7691	41256.9	4.7691	-34.2406	-36.738
2012-12-13 21:38:40	33.65	36.1	20.62	4.77605		4.77605	-34.3017	-36.7992
2012-12-13 21:48:40	33.71	36.16	20.61	4.78299		4.78299	-34.3629	-36.8603
2012-12-13 21:58:40	33.77	36.2	20.6	4.78994		4.78994	-34.4241	-36.9011
2012-12-13 22:08:40	33.24	35.76	20.59	4.79688		4.79688	-33.8838	-36.4526
2012-12-13 22:18:40	33.57	36.09	20.61	4.80383		4.80383	-34.2202	-36.789
2012-12-13 22:28:40	33.8	36.32	20.62	4.81077	41256.9	4.81077	-34.4546	-37.0234
2012-12-13 22:38:40	33.93	36.45	20.62	4.81772		4.81772	-34.5872	-37.156
2012-12-13 22:48:40	34	36.5	20.62	4.82466		4.82466	-34.6585	-37.2069
2012-12-13 22:58:40	34.1	36.62	20.61	4.8316		4.8316	-34.7604	-37.3293
2012-12-13 23:08:40	34.17	36.68	20.61	4.83855		4.83855	-34.8318	-37.3904
2012-12-13 23:18:40	34.22	36.75	20.61	4.84549		4.84549	-34.8828	-37.4618
2012-12-13 23:28:40	34.27	36.8	20.6	4.85244	41257	4.85244	-34.9337	-37.5127
2012-12-13 23:38:40	34.35	36.87	20.6	4.85938		4.85938	-35.0153	-37.5841
2012-12-13 23:48:40	34.4	36.92	20.6	4.86633		4.86633	-35.0663	-37.6351
2012-12-13 23:58:40	34.46	36.98	20.6	4.87327		4.87327	-35.1274	-37.6962
2012-12-14 00:08:40	34.51	37.03	20.59	4.88022		4.88022	-35.1784	-37.7472
2012-12-14 00:18:40	34.53	37.09	20.59	4.88716		4.88716	-35.1988	-37.8084
2012-12-14 00:28:40	34.62	37.14	20.59	4.8941	41257	4.8941	-35.2905	-37.8593
2012-12-14 00:38:40	34.66	37.18	20.58	4.90105		4.90105	-35.3313	-37.9001
2012-12-14 00:48:40	34.71	37.24	20.58	4.90799		4.90799	-35.3823	-37.9613
2012-12-14 00:58:40	34.77	37.3	20.58	4.91494		4.91494	-35.4434	-38.0224
2012-12-14 01:08:40	34.87	37.4	20.57	4.92188		4.92188	-35.5454	-38.1244
2012-12-14 01:18:40	34.9	37.42	20.57	4.92883		4.92883	-35.5759	-38.1448
2012-12-14 01:28:40	34.96	37.48	20.56	4.93577	41257.1	4.93577	-35.6371	-38.2059
2012-12-14 01:38:40	35.01	37.53	20.56	4.94272		4.94272	-35.6881	-38.2569
2012-12-14 01:48:40	35.07	37.6	20.55	4.94966		4.94966	-35.7492	-38.3282
2012-12-14 01:58:40	35.15	37.68	20.55	4.9566		4.9566	-35.8308	-38.4098
2012-12-14 02:08:40	35.18	37.7	20.54	4.96355		4.96355	-35.8614	-38.4302
2012-12-14 02:18:40	35.23	37.76	20.54	4.97049		4.97049	-35.9123	-38.4913
2012-12-14 02:28:40	35.28	37.81	20.53	4.97744	41257.1	4.97744	-35.9633	-38.5423
2012-12-14 02:38:40	35.35	37.88	20.52	4.98438		4.98438	-36.0347	-38.6137
2012-12-14 02:48:40	35.41	37.94	20.52	4.99133		4.99133	-36.0958	-38.6748
2012-12-14 02:58:40	35.46	37.99	20.51	4.99827		4.99827	-36.1468	-38.7258
2012-12-14 03:08:40	35.54	38.06	20.51	5.00522		5.00522	-36.2283	-38.7971
2012-12-14 03:18:40	35.57	38.1	20.5	5.01216		5.01216	-36.2589	-38.8379
2012-12-14 03:28:40	35.44	37.92	20.5	5.0191	41257.1	5.0191	-36.1264	-38.6544
2012-12-14 03:38:40	35.5	37.98	20.5	5.02605		5.02605	-36.1876	-38.7156
2012-12-14 03:48:40	35.52	38.01	20.5	5.03299		5.03299	-36.208	-38.7462
2012-12-14 03:58:40	35.59	38.06	20.5	5.03994		5.03994	-36.2793	-38.7971
2012-12-14 04:08:40	35.58	38.07	20.49	5.04688		5.04688	-36.2691	-38.8073
2012-12-14 04:18:40	35.68	38.16	20.49	5.05383		5.05383	-36.371	-38.8991
2012-12-14 04:28:40	35.75	38.24	20.49	5.06077	41257.2	5.06077	-36.4424	-38.9806
2012-12-14 04:38:40	35.8	38.29	20.49	5.06772		5.06772	-36.4934	-39.0316
2012-12-14 04:48:40	35.88	38.35	20.5	5.07466		5.07466	-36.5749	-39.0928
2012-12-14 04:58:40	35.92	38.4	20.5	5.0816		5.0816	-36.6157	-39.1437
2012-12-14 05:08:40	36	38.48	20.5	5.08855		5.08855	-36.6972	-39.2253
2012-12-14 05:18:40	36.06	38.55	20.5	5.09549		5.09549	-36.7584	-39.2966
2012-12-14 05:28:40	36.13	38.6	20.5	5.10244	41257.2	5.10244	-36.8298	-39.3476
2012-12-14 05:38:40	36.17	38.66	20.51	5.10938		5.10938	-36.8705	-39.4088
2012-12-14 05:48:40	36.24	38.71	20.51	5.11633		5.11633	-36.9419	-39.4597
2012-12-14 05:58:40	36.27	38.75	20.52	5.12327		5.12327	-36.9725	-39.5005
2012-12-14 06:08:40	36.3	38.79	20.52	5.13022		5.13022	-37.0031	-39.5413
2012-12-14 06:18:40	36.38	38.85	20.52	5.13716		5.13716	-37.0846	-39.6024
2012-12-14 06:28:40	36.41	38.89	20.53	5.1441	41257.3	5.1441	-37.1152	-39.6432
2012-12-14 06:38:40	36.48	38.95	20.53	5.15105		5.15105	-37.1865	-39.7044
2012-12-14 06:48:40	36.54	39.02	20.54	5.15799		5.15799	-37.2477	-39.7757
2012-12-14 06:58:40	36.57	39.05	20.54	5.16494		5.16494	-37.2783	-39.8063
2012-12-14 07:08:40	36.64	39.12	20.55	5.17188		5.17188	-37.3496	-39.8777
2012-12-14 07:18:40	36.7	39.18	20.55	5.17883		5.17883	-37.4108	-39.9388
2012-12-14 07:28:40	36.74	39.22	20.56	5.18577	41257.3	5.18577	-37.4516	-39.9796
2012-12-14 07:38:40	36.79	39.26	20.56	5.19272		5.19272	-37.5025	-40.0204
2012-12-14 07:48:40	36.84	39.33	20.57	5.19966		5.19966	-37.5535	-40.0917
2012-12-14 07:58:40	36.89	39.35	20.58	5.2066		5.2066	-37.6045	-40.1121
2012-12-14 08:08:40	36.87	39.36	20.59	5.21355		5.21355	-37.5841	-40.1223
2012-12-14 08:18:40	36.91	39.39	20.61	5.22049		5.22049	-37.6249	-40.1529
2012-12-14 08:28:40	36.96	39.42	20.62	5.22744	41257.4	5.22744	-37.6758	-40.1835
2012-12-14 08:38:40	36.98	39.46	20.65	5.23438		5.23438	-37.6962	-40.2243
2012-12-14 08:48:40	37.03	39.49	20.68	5.24133		5.24133	-37.7472	-40.2548
2012-12-14 08:58:40	36.99	39.5	20.7	5.24827		5.24827	-37.7064	-40.265
2012-12-14 09:08:40	37.12	39.59	20.73	5.25522		5.25522	-37.8389	-40.3568
2012-12-14 09:18:40	37.15	39.62	20.75	5.26216		5.26216	-37.8695	-40.3874
2012-12-14 09:28:40	37.05	39.58	20.76	5.2691	41257.4	5.2691	-37.7676	-40.3466
2012-12-14 09:38:40	37.32	39.82	20.81	5.27605		5.27605	-38.0428	-40.5912
2012-12-14 09:48:40	37.41	39.93	20.84	5.28299		5.28299	-38.1346	-40.7034
2012-12-14 09:58:40	37.46	39.97	20.86	5.28994		5.28994	-38.1855	-40.7441
2012-12-14 10:08:40	37.5	40.04	20.88	5.29688		5.29688	-38.2263	-40.8155
2012-12-14 10:18:40	37.58	40.09	20.89	5.30383		5.30383	-38.3078	-40.8665
2012-12-14 10:28:40	37.64	40.14	20.9	5.31077	41257.4	5.31077	-38.369	-40.9174
2012-12-14 10:38:40	37.71	40.2	20.92	5.31772		5.31772	-38.4404	-40.9786
2012-12-14 10:48:40	37.74	40.23	20.93	5.32466		5.32466	-38.4709	-41.0092
2012-12-14 10:58:40	37.8	40.3	20.94	5.3316		5.3316	-38.5321	-41.0805
2012-12-14 11:08:40	37.87	40.37	20.95	5.33855		5.33855	-38.6035	-41.1519
2012-12-14 11:18:40	37.89	40.4	20.96	5.34549		5.34549	-38.6239	-41.1825
2012-12-14 11:28:40	37.93	40.44	20.97	5.35244	41257.5	5.35244	-38.6646	-41.2232
2012-12-14 11:38:40	38.02	40.5	20.98	5.35938		5.35938	-38.7564	-41.2844
2012-12-14 11:48:40	38.06	40.57	20.99	5.36633		5.36633	-38.7971	-41.3558
2012-12-14 11:58:40	38.12	40.6	21.01	5.37327		5.37327	-38.8583	-41.3863
2012-12-14 12:08:40	38.16	40.63	21.03	5.38022		5.38022	-38.8991	-41.4169
2012-12-14 12:18:40	38.17	40.69	21.04	5.38716		5.38716	-38.9093	-41.4781
2012-12-14 12:28:40	38.23	40.72	21.07	5.3941	41257.5	5.3941	-38.9704	-41.5087
2012-12-14 12:38:40	38.29	40.77	21.09	5.40105		5.40105	-39.0316	-41.5596
2012-12-14 12:48:40	38.34	40.83	21.1	5.40799		5.40799	-39.0826	-41.6208
2012-12-14 12:58:40	38.39	40.88	21.12	5.41494		5.41494	-39.1335	-41.6718
2012-12-14 13:08:40	38.43	40.91	21.14	5.42188		5.42188	-39.1743	-41.7023
2012-12-14 13:18:40	38.51	40.97	21.15	5.42883		5.42883	-39.2559	-41.7635
2012-12-14 13:28:40	38.52	40.99	21.17	5.43577	41257.6	5.43577	-39.2661	-41.7839
2012-12-14 13:38:40	38.58	41.06	21.18	5.44272		5.44272	-39.3272	-41.8552
2012-12-14 13:48:40	38.61	41.09	21.19	5.44966		5.44966	-39.3578	-41.8858
2012-12-14 13:58:40	38.66	41.15	21.2	5.4566		5.4566	-39.4088	-41.947
2012-12-14 14:08:40	38.72	41.2	21.21	5.46355		5.46355	-39.4699	-41.998
2012-12-14 14:18:40	38.77	41.24	21.22	5.47049		5.47049	-39.5209	-42.0387
2012-12-14 14:28:40	38.79	41.28	21.22	5.47744	41257.6	5.47744	-39.5413	-42.0795
2012-12-14 14:38:40	38.87	41.32	21.23	5.48438		5.48438	-39.6228	-42.1203
2012-12-14 14:48:40	38.91	41.38	21.23	5.49133		5.49133	-39.6636	-42.1814
2012-12-14 14:58:40	38.97	41.44	21.24	5.49827		5.49827	-39.7248	-42.2426
2012-12-14 15:08:40	39.03	41.46	21.24	5.50522		5.50522	-39.7859	-42.263
2012-12-14 15:18:40	39.05	41.52	21.25	5.51216		5.51216	-39.8063	-42.3242
2012-12-14 15:28:40	39.12	41.6	21.25	5.5191	41257.6	5.5191	-39.8777	-42.4057
2012-12-14 15:38:40	39.18	41.63	21.25	5.52605		5.52605	-39.9388	-42.4363
2012-12-14 15:48:40	39.24	41.72	21.25	5.53299		5.53299	-40	-42.528
2012-12-14 15:58:40	39.3	41.75	21.25	5.53994		5.53994	-40.0612	-42.5586
2012-12-14 16:08:40	39.33	41.82	21.25	5.54688		5.54688	-40.0917	-42.63
2012-12-14 16:18:40	39.43	41.9	21.25	5.55383		5.55383	-40.1937	-42.7115
2012-12-14 16:28:40	39.46	41.97	21.24	5.56077	41257.7	5.56077	-40.2243	-42.7829
2012-12-14 16:38:40	39.57	42.04	21.24	5.56772		5.56772	-40.3364	-42.8542
2012-12-14 16:48:40	39.6	42.09	21.23	5.57466		5.57466	-40.367	-42.9052
2012-12-14 16:58:40	39.66	42.14	21.22	5.5816		5.5816	-40.4281	-42.9562
2012-12-14 17:08:40	39.74	42.24	21.2	5.58855		5.58855	-40.5097	-43.0581
2012-12-14 17:18:40	39.79	42.3	21.19	5.59549		5.59549	-40.5607	-43.1193
2012-12-14 17:28:40	39.87	42.35	21.18	5.60244	41257.7	5.60244	-40.6422	-43.1702
2012-12-14 17:38:40	39.9	42.38	21.16	5.60938		5.60938	-40.6728	-43.2008
2012-12-14 17:48:40	40	42.49	21.15	5.61633		5.61633	-40.7747	-43.3129
2012-12-14 17:58:40	40.05	42.53	21.14	5.62327		5.62327	-40.8257	-43.3537
2012-12-14 18:08:40	40.14	42.6	21.12	5.63022		5.63022	-40.9174	-43.4251
2012-12-14 18:18:40	40.21	42.7	21.11	5.63716		5.63716	-40.9888	-43.527
2012-12-14 18:28:40	40.25	42.72	21.1	5.6441	41257.8	5.6441	-41.0296	-43.5474
2012-12-14 18:38:40	40.31	42.81	21.09	5.65105		5.65105	-41.0907	-43.6391
2012-12-14 18:48:40	40.38	42.89	21.09	5.65799		5.65799	-41.1621	-43.7207
2012-12-14 18:58:40	40.46	42.97	21.1	5.66494		5.66494	-41.2436	-43.8022
2012-12-14 19:08:40	40.2	42.68	21.13	5.67188		5.67188	-40.9786	-43.5066
2012-12-14 19:18:40	40.34	42.82	21.2	5.67883		5.67883	-41.1213	-43.6493
2012-12-14 19:28:40	40.44	42.92	21.26	5.68577	41257.8	5.68577	-41.2232	-43.7513
2012-12-14 19:38:40	40.54	43	21.29	5.69272		5.69272	-41.3252	-43.8328
2012-12-14 19:48:40	40.61	43.07	21.32	5.69966		5.69966	-41.3965	-43.9042
2012-12-14 19:58:40	40.55	43.14	21.34	5.7066		5.7066	-41.3354	-43.9755
2012-12-14 20:08:40	40.69	43.12	21.35	5.71355		5.71355	-41.4781	-43.9551
2012-12-14 20:18:40	40.78	43.22	21.4	5.72049		5.72049	-41.5698	-44.0571
2012-12-14 20:28:40	40.83	43.25	21.42	5.72744	41257.9	5.72744	-41.6208	-44.0877
2012-12-14 20:38:40	40.92	43.34	21.43	5.73438		5.73438	-41.7125	-44.1794
2012-12-14 20:48:40	40.98	43.41	21.42	5.74133		5.74133	-41.7737	-44.2508
2012-12-14 20:58:40	41.05	43.49	21.41	5.74827		5.74827	-41.8451	-44.3323
2012-12-14 21:08:40	41.17	43.59	21.39	5.75522		5.75522	-41.9674	-44.4343
2012-12-14 21:18:40	41.23	43.66	21.37	5.76216		5.76216	-42.0285	-44.5056
2012-12-14 21:28:40	41.32	43.76	21.35	5.7691	41257.9	5.7691	-42.1203	-44.6075
2012-12-14 21:38:40	41.42	43.83	21.32	5.77605		5.77605	-42.2222	-44.6789
2012-12-14 21:48:40	41.27	43.64	21.3	5.78299		5.78299	-42.0693	-44.4852
2012-12-14 21:58:40	41.35	43.72	21.28	5.78994		5.78994	-42.1509	-44.5668
2012-12-14 22:08:40	41.36	43.79	21.25	5.79688		5.79688	-42.1611	-44.6381
2012-12-14 22:18:40	41.49	43.88	21.23	5.80383		5.80383	-42.2936	-44.7299
2012-12-14 22:28:40	41.56	43.96	21.21	5.81077	41257.9	5.81077	-42.3649	-44.8114
2012-12-14 22:38:40	41.66	44.03	21.18	5.81772		5.81772	-42.4669	-44.8828
2012-12-14 22:48:40	41.76	44.14	21.16	5.82466		5.82466	-42.5688	-44.9949
2012-12-14 22:58:40	41.79	44.2	21.14	5.8316		5.8316	-42.5994	-45.0561
2012-12-14 23:08:40	41.88	44.27	21.12	5.83855		5.83855	-42.6911	-45.1274
2012-12-14 23:18:40	41.94	44.33	21.11	5.84549		5.84549	-42.7523	-45.1886
2012-12-14 23:28:40	41.99	44.39	21.09	5.85244	41258	5.85244	-42.8033	-45.2497
2012-12-14 23:38:40	42.11	44.51	21.07	5.85938		5.85938	-42.9256	-45.3721
2012-12-14 23:48:40	42.15	44.58	21.06	5.86633		5.86633	-42.9664	-45.4434
2012-12-14 23:58:40	42.23	44.63	21.05	5.87327		5.87327	-43.0479	-45.4944
2012-12-15 00:08:40	42.32	44.71	21.03	5.88022		5.88022	-43.1397	-45.5759
2012-12-15 00:18:40	42.38	44.79	21.02	5.88716		5.88716	-43.2008	-45.6575
2012-12-15 00:28:40	42.46	44.87	21.01	5.8941	41258	5.8941	-43.2824	-45.739
2012-12-15 00:38:40	42.53	44.93	21	5.90105		5.90105	-43.3537	-45.8002
2012-12-15 00:48:40	42.62	45.03	20.99	5.90799		5.90799	-43.4455	-45.9021
2012-12-15 00:58:40	42.68	45.08	20.98	5.91494		5.91494	-43.5066	-45.9531
2012-12-15 01:08:40	42.74	45.15	20.97	5.92188		5.92188	-43.5678	-46.0245
2012-12-15 01:18:40	42.78	45.22	20.96	5.92883		5.92883	-43.6086	-46.0958
2012-12-15 01:28:40	42.87	45.3	20.96	5.93577	41258.1	5.93577	-43.7003	-46.1774
2012-12-15 01:38:40	42.93	45.37	20.95	5.94272		5.94272	-43.7615	-46.2487
2012-12-15 01:48:40	43.04	45.47	20.94	5.94966		5.94966	-43.8736	-46.3507
2012-12-15 01:58:40	43.11	45.53	20.94	5.9566		5.9566	-43.945	-46.4118
2012-12-15 02:08:40	43.21	45.62	20.93	5.96355		5.96355	-44.0469	-46.5036
2012-12-15 02:18:40	43.26	45.69	20.93	5.97049		5.97049	-44.0979	-46.5749
2012-12-15 02:28:40	43.31	45.73	20.92	5.97744	41258.1	5.97744	-44.1488	-46.6157
2012-12-15 02:38:40	43.39	45.83	20.92	5.98438		5.98438	-44.2304	-46.7176
2012-12-15 02:48:40	43.46	45.9	20.91	5.99133		5.99133	-44.3017	-46.789
2012-12-15 02:58:40	43.54	45.97	20.91	5.99827		5.99827	-44.3833	-46.8603
2012-12-15 03:08:40	43.62	46.06	20.91	6.00522		6.00522	-44.4648	-46.9521
2012-12-15 03:18:40	43.66	46.08	20.91	6.01216		6.01216	-44.5056	-46.9725
2012-12-15 03:28:40	43.75	46.18	20.91	6.0191	41258.1	6.0191	-44.5973	-47.0744
2012-12-15 03:38:40	43.76	46.2	20.91	6.02605		6.02605	-44.6075	-47.0948
2012-12-15 03:48:40	43.84	46.28	20.91	6.03299		6.03299	-44.6891	-47.1764
2012-12-15 03:58:40	43.91	46.34	20.91	6.03994		6.03994	-44.7604	-47.2375
2012-12-15 04:08:40	43.97	46.4	20.91	6.04688		6.04688	-44.8216	-47.2987
2012-12-15 04:18:40	44.07	46.49	20.91	6.05383		6.05383	-44.9235	-47.3904
2012-12-15 04:28:40	44.13	46.55	20.92	6.06077	41258.2	6.06077	-44.9847	-47.4516
2012-12-15 04:38:40	44.19	46.62	20.92	6.06772		6.06772	-45.0459	-47.5229
2012-12-15 04:48:40	44.25	46.67	20.92	6.07466		6.07466	-45.107	-47.5739
2012-12-15 04:58:40	44.31	46.74	20.93	6.0816		6.0816	-45.1682	-47.6453
2012-12-15 05:08:40	44.41	46.84	20.93	6.08855		6.08855	-45.2701	-47.7472
2012-12-15 05:18:40	44.47	46.9	20.93	6.09549		6.09549	-45.3313	-47.8084
2012-12-15 05:28:40	44.55	46.96	20.93	6.10244	41258.2	6.10244	-45.4128	-47.8695
2012-12-15 05:38:40	44.61	47.03	20.94	6.10938		6.10938	-45.474	-47.9409
2012-12-15 05:48:40	44.67	47.11	20.95	6.11633		6.11633	-45.5352	-48.0224
2012-12-15 05:58:40	44.74	47.18	20.96	6.12327		6.12327	-45.6065	-48.0938
2012-12-15 06:08:40	44.83	47.26	20.97	6.13022		6.13022	-45.6983	-48.1753
2012-12-15 06:18:40	44.92	47.33	20.98	6.13716		6.13716	-45.79	-48.2467
2012-12-15 06:28:40	44.99	47.41	20.99	6.1441	41258.3	6.1441	-45.8614	-48.3282
2012-12-15 06:38:40	45.05	47.46	21.01	6.15105		6.15105	-45.9225	-48.3792
2012-12-15 06:48:40	45.13	47.53	21.02	6.15799		6.15799	-46.0041	-48.4506
2012-12-15 06:58:40	45.2	47.61	21.04	6.16494		6.16494	-46.0754	-48.5321
2012-12-15 07:08:40	45.24	47.66	21.06	6.17188		6.17188	-46.1162	-48.5831
2012-12-15 07:18:40	45.32	47.74	21.07	6.17883		6.17883	-46.1978	-48.6646
2012-12-15 07:28:40	45.33	47.81	21.09	6.18577	41258.3	6.18577	-46.208	-48.736
2012-12-15 07:38:40	45.44	47.86	21.11	6.19272		6.19272	-46.3201	-48.787
2012-12-15 07:48:40	45.52	47.94	21.12	6.19966		6.19966	-46.4016	-48.8685
2012-12-15 07:58:40	45.57	47.98	21.14	6.2066		6.2066	-46.4526	-48.9093
2012-12-15 08:08:40	45.61	48.05	21.16	6.21355		6.21355	-46.4934	-48.9806
2012-12-15 08:18:40	45.65	48.11	21.17	6.22049		6.22049	-46.5341	-49.0418
2012-12-15 08:28:40	45.79	48.19	21.19	6.22744	41258.4	6.22744	-46.6769	-49.1233
2012-12-15 08:38:40	45.85	48.25	21.2	6.23438		6.23438	-46.738	-49.1845
2012-12-15 08:48:40	45.9	48.3	21.22	6.24133		6.24133	-46.789	-49.2355
2012-12-15 08:58:40	45.98	48.39	21.23	6.24827		6.24827	-46.8705	-49.3272
2012-12-15 09:08:40	46.02	48.45	21.24	6.25522		6.25522	-46.9113	-49.3884
2012-12-15 09:18:40	46.07	48.47	21.25	6.26216		6.26216	-46.9623	-49.4088
2012-12-15 09:28:40	46.15	48.54	21.27	6.2691	41258.4	6.2691	-47.0438	-49.4801
2012-12-15 09:38:40	46.24	48.64	21.28	6.27605		6.27605	-47.1356	-49.5821
2012-12-15 09:48:40	46.32	48.71	21.29	6.28299		6.28299	-47.2171	-49.6534
2012-12-15 09:58:40	46.38	48.78	21.29	6.28994		6.28994	-47.2783	-49.7248
2012-12-15 10:08:40	46.46	48.85	21.3	6.29688		6.29688	-47.3598	-49.7961
2012-12-15 10:18:40	46.51	48.92	21.31	6.30383		6.30383	-47.4108	-49.8675
2012-12-15 10:28:40	46.58	48.96	21.32	6.31077	41258.4	6.31077	-47.4822	-49.9083
2012-12-15 10:38:40	46.65	49.03	21.33	6.31772		6.31772	-47.5535	-49.9796
2012-12-15 10:48:40	46.71	49.1	21.34	6.32466		6.32466	-47.6147	-50.051
2012-12-15 10:58:40	46.78	49.15	21.36	6.3316		6.3316	-47.686	-50.1019
2012-12-15 11:08:40	46.84	49.23	21.37	6.33855		6.33855	-47.7472	-50.1835
2012-12-15 11:18:40	46.88	49.28	21.38	6.34549		6.34549	-47.788	-50.2345
2012-12-15 11:28:40	46.93	49.32	21.39	6.35244	41258.5	6.35244	-47.8389	-50.2752
2012-12-15 11:38:40	46.97	49.35	21.41	6.35938		6.35938	-47.8797	-50.3058
2012-12-15 11:48:40	46.96	49.42	21.41	6.36633		6.36633	-47.8695	-50.3772
2012-12-15 11:58:40	47.17	49.6	21.45	6.37327		6.37327	-48.0836	-50.5607
2012-12-15 12:08:40	47.24	49.68	21.48	6.38022		6.38022	-48.1549	-50.6422
2012-12-15 12:18:40	47.35	49.81	21.5	6.38716		6.38716	-48.2671	-50.7747
2012-12-15 12:28:40	47.42	49.89	21.51	6.3941	41258.5	6.3941	-48.3384	-50.8563
2012-12-15 12:38:40	47.49	49.96	21.53	6.40105		6.40105	-48.4098	-50.9276
2012-12-15 12:48:40	47.54	49.99	21.54	6.40799		6.40799	-48.4608	-50.9582
2012-12-15 12:58:40	47.62	50.07	21.54	6.41494		6.41494	-48.5423	-51.0398
2012-12-15 13:08:40	47.72	50.17	21.55	6.42188		6.42188	-48.6442	-51.1417
2012-12-15 13:18:40	47.78	50.23	21.56	6.42883		6.42883	-48.7054	-51.2029
2012-12-15 13:28:40	47.87	50.33	21.56	6.43577	41258.6	6.43577	-48.7971	-51.3048
2012-12-15 13:38:40	47.95	50.41	21.57	6.44272		6.44272	-48.8787	-51.3863
2012-12-15 13:48:40	48	50.46	21.57	6.44966		6.44966	-48.9297	-51.4373
2012-12-15 13:58:40	48.05	50.51	21.57	6.4566		6.4566	-48.9806	-51.4883
2012-12-15 14:08:40	48.14	50.61	21.57	6.46355		6.46355	-49.0724	-51.5902
2012-12-15 14:18:40	48.24	50.7	21.58	6.47049		6.47049	-49.1743	-51.682
2012-12-15 14:28:40	48.3	50.76	21.58	6.47744	41258.6	6.47744	-49.2355	-51.7431
2012-12-15 14:38:40	48.38	50.83	21.58	6.48438		6.48438	-49.317	-51.8145
2012-12-15 14:48:40	48.45	50.9	21.59	6.49133		6.49133	-49.3884	-51.8858
2012-12-15 14:58:40	48.52	50.98	21.59	6.49827		6.49827	-49.4597	-51.9674
2012-12-15 15:08:40	48.6	51.06	21.59	6.50522		6.50522	-49.5413	-52.0489
2012-12-15 15:18:40	48.68	51.14	21.59	6.51216		6.51216	-49.6228	-52.1305
2012-12-15 15:28:40	48.7	51.21	21.59	6.5191	41258.6	6.5191	-49.6432	-52.2018
2012-12-15 15:38:40	48.83	51.29	21.59	6.52605		6.52605	-49.7757	-52.2834
2012-12-15 15:48:40	48.89	51.34	21.59	6.53299		6.53299	-49.8369	-52.3344
2012-12-15 15:58:40	48.95	51.41	21.6	6.53994		6.53994	-49.8981	-52.4057
2012-12-15 16:08:40	49.05	51.5	21.6	6.54688		6.54688	-50	-52.4975
2012-12-15 16:18:40	49.11	51.57	21.6	6.55383		6.55383	-50.0612	-52.5688
2012-12-15 16:28:40	49.22	51.68	21.6	6.56077	41258.7	6.56077	-50.1733	-52.6809
2012-12-15 16:38:40	49.29	51.74	21.6	6.56772		6.56772	-50.2446	-52.7421
2012-12-15 16:48:40	49.37	51.84	21.6	6.57466		6.57466	-50.3262	-52.844
2012-12-15 16:58:40	49.46	51.92	21.6	6.5816		6.5816	-50.4179	-52.9256
2012-12-15 17:08:40	49.52	51.98	21.6	6.58855		6.58855	-50.4791	-52.9867
2012-12-15 17:18:40	49.6	52.07	21.6	6.59549		6.59549	-50.5607	-53.0785
2012-12-15 17:28:40	49.68	52.14	21.6	6.60244	41258.7	6.60244	-50.6422	-53.1498
2012-12-15 17:38:40	49.76	52.22	21.6	6.60938		6.60938	-50.7238	-53.2314
2012-12-15 17:48:40	49.82	52.29	21.61	6.61633		6.61633	-50.7849	-53.3028
2012-12-15 17:58:40	49.92	52.38	21.61	6.62327		6.62327	-50.8869	-53.3945
2012-12-15 18:08:40	49.99	52.43	21.61	6.63022		6.63022	-50.9582	-53.4455
2012-12-15 18:18:40	50.06	52.51	21.61	6.63716		6.63716	-51.0296	-53.527
2012-12-15 18:28:40	50.17	52.63	21.61	6.6441	41258.8	6.6441	-51.1417	-53.6493
2012-12-15 18:38:40	50.24	52.71	21.61	6.65105		6.65105	-51.213	-53.7309
2012-12-15 18:48:40	50.32	52.79	21.61	6.65799		6.65799	-51.2946	-53.8124
2012-12-15 18:58:40	50.41	52.88	21.61	6.66494		6.66494	-51.3863	-53.9042
2012-12-15 19:08:40	50.51	52.98	21.61	6.67188		6.67188	-51.4883	-54.0061
2012-12-15 19:18:40	50.62	53.09	21.61	6.67883		6.67883	-51.6004	-54.1182
2012-12-15 19:28:40	50.68	53.16	21.61	6.68577	41258.8	6.68577	-51.6616	-54.1896
2012-12-15 19:38:40	50.8	53.27	21.61	6.69272		6.69272	-51.7839	-54.3017
2012-12-15 19:48:40	50.89	53.35	21.6	6.69966		6.69966	-51.8756	-54.3833
2012-12-15 19:58:40	50.97	53.44	21.6	6.7066		6.7066	-51.9572	-54.475
2012-12-15 20:08:40	51.08	53.54	21.6	6.71355		6.71355	-52.0693	-54.577
2012-12-15 20:18:40	51.17	53.63	21.6	6.72049		6.72049	-52.1611	-54.6687
2012-12-15 20:28:40	51.23	53.7	21.59	6.72744	41258.9	6.72744	-52.2222	-54.7401
2012-12-15 20:38:40	51.34	53.81	21.59	6.73438		6.73438	-52.3344	-54.8522
2012-12-15 20:48:40	51.45	53.91	21.59	6.74133		6.74133	-52.4465	-54.9541
2012-12-15 20:58:40	51.52	53.99	21.58	6.74827		6.74827	-52.5178	-55.0357
2012-12-15 21:08:40	51.58	54.07	21.58	6.75522		6.75522	-52.579	-55.1172
2012-12-15 21:18:40	51.69	54.16	21.58	6.76216		6.76216	-52.6911	-55.209
2012-12-15 21:28:40	51.78	54.25	21.57	6.7691	41258.9	6.7691	-52.7829	-55.3007
2012-12-15 21:38:40	51.87	54.32	21.57	6.77605		6.77605	-52.8746	-55.3721
2012-12-15 21:48:40	51.99	54.45	21.57	6.78299		6.78299	-52.9969	-55.5046
2012-12-15 21:58:40	52.05	54.52	21.57	6.78994		6.78994	-53.0581	-55.5759
2012-12-15 22:08:40	52.13	54.6	21.56	6.79688		6.79688	-53.1397	-55.6575
2012-12-15 22:18:40	52.23	54.7	21.56	6.80383		6.80383	-53.2416	-55.7594
2012-12-15 22:28:40	52.32	54.8	21.56	6.81077	41258.9	6.81077	-53.3333	-55.8614
2012-12-15 22:38:40	52.4	54.87	21.55	6.81772		6.81772	-53.4149	-55.9327
2012-12-15 22:48:40	52.51	54.99	21.55	6.82466		6.82466	-53.527	-56.055
2012-12-15 22:58:40	52.62	55.09	21.55	6.8316		6.8316	-53.6391	-56.157
2012-12-15 23:08:40	52.69	55.16	21.54	6.83855		6.83855	-53.7105	-56.2283
2012-12-15 23:18:40	52.81	55.29	21.53	6.84549		6.84549	-53.8328	-56.3609
2012-12-15 23:28:40	52.9	55.36	21.53	6.85244	41259	6.85244	-53.9246	-56.4322
2012-12-15 23:38:40	52.96	55.42	21.52	6.85938		6.85938	-53.9857	-56.4934
2012-12-15 23:48:40	53.05	55.52	21.52	6.86633		6.86633	-54.0775	-56.5953
2012-12-15 23:58:40	53.17	55.65	21.52	6.87327		6.87327	-54.1998	-56.7278
2012-12-16 00:08:40	53.27	55.75	21.51	6.88022		6.88022	-54.3017	-56.8298
2012-12-16 00:18:40	53.35	55.84	21.51	6.88716		6.88716	-54.3833	-56.9215
2012-12-16 00:28:40	53.42	55.9	21.51	6.8941	41259	6.8941	-54.4546	-56.9827
2012-12-16 00:38:40	53.5	55.97	21.5	6.90105		6.90105	-54.5362	-57.054
2012-12-16 00:48:40	53.62	56.1	21.5	6.90799		6.90799	-54.6585	-57.1865
2012-12-16 00:58:40	53.71	56.19	21.5	6.91494		6.91494	-54.7503	-57.2783
2012-12-16 01:08:40	53.81	56.29	21.5	6.92188		6.92188	-54.8522	-57.3802
2012-12-16 01:18:40	53.9	56.4	21.49	6.92883		6.92883	-54.9439	-57.4924
2012-12-16 01:28:40	53.99	56.49	21.49	6.93577	41259.1	6.93577	-55.0357	-57.5841
2012-12-16 01:38:40	54.1	56.59	21.49	6.94272		6.94272	-55.1478	-57.686
2012-12-16 01:48:40	54.2	56.69	21.49	6.94966		6.94966	-55.2497	-57.788
2012-12-16 01:58:40	54.3	56.8	21.49	6.9566		6.9566	-55.3517	-57.9001
2012-12-16 02:08:40	54.38	56.88	21.49	6.96355		6.96355	-55.4332	-57.9817
2012-12-16 02:18:40	54.47	56.98	21.49	6.97049		6.97049	-55.525	-58.0836
2012-12-16 02:28:40	54.57	57.07	21.48	6.97744	41259.1	6.97744	-55.6269	-58.1753
2012-12-16 02:38:40	54.66	57.17	21.48	6.98438		6.98438	-55.7187	-58.2773
2012-12-16 02:48:40	54.75	57.27	21.48	6.99133		6.99133	-55.8104	-58.3792
2012-12-16 02:58:40	54.86	57.34	21.48	6.99827		6.99827	-55.9225	-58.4506
2012-12-16 03:08:40	54.96	57.47	21.48	7.00522		7.00522	-56.0245	-58.5831
2012-12-16 03:18:40	55.08	57.58	21.48	7.01216		7.01216	-56.1468	-58.6952
2012-12-16 03:28:40	55.16	57.65	21.48	7.0191	41259.1	7.0191	-56.2283	-58.7666
2012-12-16 03:38:40	55.29	57.79	21.48	7.02605		7.02605	-56.3609	-58.9093
2012-12-16 03:48:40	55.4	57.87	21.48	7.03299		7.03299	-56.473	-58.9908
2012-12-16 03:58:40	55.5	58	21.47	7.03994		7.03994	-56.5749	-59.1233
2012-12-16 04:08:40	55.6	58.09	21.47	7.04688		7.04688	-56.6769	-59.2151
2012-12-16 04:18:40	55.69	58.2	21.47	7.05383		7.05383	-56.7686	-59.3272
2012-12-16 04:28:40	55.8	58.3	21.47	7.06077	41259.2	7.06077	-56.8807	-59.4292
2012-12-16 04:38:40	55.89	58.4	21.47	7.06772		7.06772	-56.9725	-59.5311
2012-12-16 04:48:40	55.99	58.5	21.47	7.07466		7.07466	-57.0744	-59.633
2012-12-16 04:58:40	56.11	58.62	21.47	7.0816		7.0816	-57.1967	-59.7554
2012-12-16 05:08:40	56.22	58.71	21.47	7.08855		7.08855	-57.3089	-59.8471
2012-12-16 05:18:40	56.29	58.81	21.47	7.09549		7.09549	-57.3802	-59.949
2012-12-16 05:28:40	56.37	58.89	21.47	7.10244	41259.2	7.10244	-57.4618	-60.0306
2012-12-16 05:38:40	56.49	58.99	21.47	7.10938		7.10938	-57.5841	-60.1325
2012-12-16 05:48:40	56.61	59.11	21.47	7.11633		7.11633	-57.7064	-60.2548
2012-12-16 05:58:40	56.7	59.2	21.47	7.12327		7.12327	-57.7982	-60.3466
2012-12-16 06:08:40	56.8	59.31	21.47	7.13022		7.13022	-57.9001	-60.4587
2012-12-16 06:18:40	56.9	59.42	21.47	7.13716		7.13716	-58.002	-60.5708
2012-12-16 06:28:40	56.98	59.51	21.47	7.1441	41259.3	7.1441	-58.0836	-60.6626
2012-12-16 06:38:40	57.13	59.63	21.47	7.15105		7.15105	-58.2365	-60.7849
2012-12-16 06:48:40	57.22	59.73	21.47	7.15799		7.15799	-58.3282	-60.8869
2012-12-16 06:58:40	57.33	59.84	21.47	7.16494		7.16494	-58.4404	-60.999
2012-12-16 07:08:40	57.45	59.96	21.47	7.17188		7.17188	-58.5627	-61.1213
2012-12-16 07:18:40	57.57	60.08	21.47	7.17883		7.17883	-58.685	-61.2436
2012-12-16 07:28:40	57.68	60.18	21.47	7.18577	41259.3	7.18577	-58.7971	-61.3456
2012-12-16 07:38:40	57.8	60.3	21.47	7.19272		7.19272	-58.9195	-61.4679
2012-12-16 07:48:40	57.85	60.37	21.47	7.19966		7.19966	-58.9704	-61.5392
2012-12-16 07:58:40	57.97	60.48	21.46	7.2066		7.2066	-59.0928	-61.6514
2012-12-16 08:08:40	58.1	60.61	21.46	7.21355		7.21355	-59.2253	-61.7839
2012-12-16 08:18:40	58.19	60.71	21.47	7.22049		7.22049	-59.317	-61.8858
2012-12-16 08:28:40	58.26	60.77	21.47	7.22744	41259.4	7.22744	-59.3884	-61.947
2012-12-16 08:38:40	58.4	60.91	21.48	7.23438		7.23438	-59.5311	-62.0897
2012-12-16 08:48:40	58.49	60.99	21.48	7.24133		7.24133	-59.6228	-62.1713
2012-12-16 08:58:40	58.59	61.1	21.49	7.24827		7.24827	-59.7248	-62.2834
2012-12-16 09:08:40	58.73	61.24	21.49	7.25522		7.25522	-59.8675	-62.4261
2012-12-16 09:18:40	58.85	61.35	21.5	7.26216		7.26216	-59.9898	-62.5382
2012-12-16 09:28:40	58.94	61.43	21.51	7.2691	41259.4	7.2691	-60.0815	-62.6198
2012-12-16 09:38:40	59.02	61.53	21.52	7.27605		7.27605	-60.1631	-62.7217
2012-12-16 09:48:40	59.08	61.58	21.52	7.28299		7.28299	-60.2243	-62.7727
2012-12-16 09:58:40	59.2	61.73	21.53	7.28994		7.28994	-60.3466	-62.9256
2012-12-16 10:08:40	59.33	61.84	21.54	7.29688		7.29688	-60.4791	-63.0377
2012-12-16 10:18:40	59.46	61.97	21.55	7.30383		7.30383	-60.6116	-63.1702
2012-12-16 10:28:40	59.54	62.05	21.55	7.31077	41259.4	7.31077	-60.6932	-63.2518
2012-12-16 10:38:40	59.63	62.14	21.56	7.31772		7.31772	-60.7849	-63.3435
2012-12-16 10:48:40	59.75	62.26	21.57	7.32466		7.32466	-60.9072	-63.4659
2012-12-16 10:58:40	59.89	62.39	21.57	7.3316		7.3316	-61.0499	-63.5984
2012-12-16 11:08:40	59.98	62.49	21.58	7.33855		7.33855	-61.1417	-63.7003
2012-12-16 11:18:40	60.11	62.62	21.59	7.34549		7.34549	-61.2742	-63.8328
2012-12-16 11:28:40	60.19	62.69	21.59	7.35244	41259.5	7.35244	-61.3558	-63.9042
2012-12-16 11:38:40	60.29	62.8	21.6	7.35938		7.35938	-61.4577	-64.0163
2012-12-16 11:48:40	60.39	62.89	21.6	7.36633		7.36633	-61.5596	-64.1081
2012-12-16 11:58:40	60.49	63	21.61	7.37327		7.37327	-61.6616	-64.2202
2012-12-16 12:08:40	60.59	63.15	21.61	7.38022		7.38022	-61.7635	-64.3731
2012-12-16 12:18:40	60.72	63.24	21.62	7.38716		7.38716	-61.896	-64.4648
2012-12-16 12:28:40	60.85	63.35	21.62	7.3941	41259.5	7.3941	-62.0285	-64.577
2012-12-16 12:38:40	60.97	63.46	21.63	7.40105		7.40105	-62.1509	-64.6891
2012-12-16 12:48:40	61.09	63.59	21.63	7.40799		7.40799	-62.2732	-64.8216
2012-12-16 12:58:40	61.19	63.7	21.64	7.41494		7.41494	-62.3751	-64.9337
2012-12-16 13:08:40	61.31	63.81	21.64	7.42188		7.42188	-62.4975	-65.0459
2012-12-16 13:18:40	61.38	63.89	21.65	7.42883		7.42883	-62.5688	-65.1274
2012-12-16 13:28:40	61.5	64.01	21.66	7.43577	41259.6	7.43577	-62.6911	-65.2497
2012-12-16 13:38:40	61.61	64.05	21.66	7.44272		7.44272	-62.8033	-65.2905
2012-12-16 13:48:40	61.72	64.22	21.67	7.44966		7.44966	-62.9154	-65.4638
2012-12-16 13:58:40	61.84	64.31	21.67	7.4566		7.4566	-63.0377	-65.5556
2012-12-16 14:08:40	61.92	64.42	21.68	7.46355		7.46355	-63.1193	-65.6677
2012-12-16 14:18:40	62.07	64.56	21.69	7.47049		7.47049	-63.2722	-65.8104
2012-12-16 14:28:40	62.19	64.72	21.69	7.47744	41259.6	7.47744	-63.3945	-65.9735
2012-12-16 14:38:40	62.34	64.85	21.7	7.48438		7.48438	-63.5474	-66.106
2012-12-16 14:48:40	61.88	64.36	21.7	7.49133		7.49133	-63.0785	-65.6065
2012-12-16 14:58:40	62.18	64.68	21.72	7.49827		7.49827	-63.3843	-65.9327
2012-12-16 15:08:40	62.37	64.87	21.73	7.50522		7.50522	-63.578	-66.1264
2012-12-16 15:18:40	62.54	65.03	21.75	7.51216		7.51216	-63.7513	-66.2895
2012-12-16 15:28:40	62.7	65.19	21.76	7.5191	41259.6	7.5191	-63.9144	-66.4526
2012-12-16 15:38:40	62.85	65.32	21.76	7.52605		7.52605	-64.0673	-66.5851
2012-12-16 15:48:40	63	65.47	21.77	7.53299		7.53299	-64.2202	-66.738
2012-12-16 15:58:40	63.07	65.64	21.77	7.53994		7.53994	-64.2915	-66.9113
2012-12-16 16:08:40	63.24	65.74	21.78	7.54688		7.54688	-64.4648	-67.0133
2012-12-16 16:18:40	63.4	65.88	21.78	7.55383		7.55383	-64.6279	-67.156
2012-12-16 16:28:40	63.55	66.04	21.79	7.56077	41259.7	7.56077	-64.7808	-67.3191
2012-12-16 16:38:40	63.66	66.15	21.79	7.56772		7.56772	-64.893	-67.4312
2012-12-16 16:48:40	63.81	66.3	21.8	7.57466		7.57466	-65.0459	-67.5841
2012-12-16 16:58:40	63.93	66.41	21.8	7.5816		7.5816	-65.1682	-67.6962
2012-12-16 17:08:40	64.06	66.56	21.8	7.58855		7.58855	-65.3007	-67.8491
2012-12-16 17:18:40	64.2	66.69	21.8	7.59549		7.59549	-65.4434	-67.9817
2012-12-16 17:28:40	64.36	66.84	21.81	7.60244	41259.7	7.60244	-65.6065	-68.1346
2012-12-16 17:38:40	64.5	66.99	21.81	7.60938		7.60938	-65.7492	-68.2875
2012-12-16 17:48:40	64.63	67.11	21.81	7.61633		7.61633	-65.8818	-68.4098
2012-12-16 17:58:40	64.79	67.27	21.81	7.62327		7.62327	-66.0449	-68.5729
2012-12-16 18:08:40	64.93	67.39	21.81	7.63022		7.63022	-66.1876	-68.6952
2012-12-16 18:18:40	65.07	67.57	21.81	7.63716		7.63716	-66.3303	-68.8787
2012-12-16 18:28:40	65.2	67.69	21.81	7.6441	41259.8	7.6441	-66.4628	-69.001
2012-12-16 18:38:40	65.33	67.84	21.81	7.65105		7.65105	-66.5953	-69.1539
2012-12-16 18:48:40	65.5	67.99	21.81	7.65799		7.65799	-66.7686	-69.3068
2012-12-16 18:58:40	65.64	68.11	21.81	7.66494		7.66494	-66.9113	-69.4292
2012-12-16 19:08:40	65.73	68.21	21.8	7.67188		7.67188	-67.0031	-69.5311
2012-12-16 19:18:40	65.9	68.4	21.8	7.67883		7.67883	-67.1764	-69.7248
2012-12-16 19:28:40	66.05	68.54	21.79	7.68577	41259.8	7.68577	-67.3293	-69.8675
2012-12-16 19:38:40	66.2	68.69	21.79	7.69272		7.69272	-67.4822	-70.0204
2012-12-16 19:48:40	66.35	68.85	21.78	7.69966		7.69966	-67.6351	-70.1835
2012-12-16 19:58:40	66.49	68.98	21.78	7.7066		7.7066	-67.7778	-70.316
2012-12-16 20:08:40	66.66	69.15	21.78	7.71355		7.71355	-67.9511	-70.4893
2012-12-16 20:18:40	66.8	69.28	21.77	7.72049		7.72049	-68.0938	-70.6218
2012-12-16 20:28:40	66.93	69.41	21.77	7.72744	41259.9	7.72744	-68.2263	-70.7543
2012-12-16 20:38:40	67.08	69.58	21.76	7.73438		7.73438	-68.3792	-70.9276
2012-12-16 20:48:40	67.24	69.72	21.76	7.74133		7.74133	-68.5423	-71.0703
2012-12-16 20:58:40	67.39	69.89	21.76	7.74827		7.74827	-68.6952	-71.2436
2012-12-16 21:08:40	67.54	70.05	21.76	7.75522		7.75522	-68.8481	-71.4067
2012-12-16 21:18:40	67.68	70.17	21.75	7.76216		7.76216	-68.9908	-71.5291
2012-12-16 21:28:40	67.84	70.33	21.75	7.7691	41259.9	7.7691	-69.1539	-71.6922
2012-12-16 21:38:40	67.99	70.48	21.75	7.77605		7.77605	-69.3068	-71.8451
2012-12-16 21:48:40	68.15	70.66	21.75	7.78299		7.78299	-69.4699	-72.0285
2012-12-16 21:58:40	68.3	70.81	21.74	7.78994		7.78994	-69.6228	-72.1814
2012-12-16 22:08:40	68.42	70.95	21.74	7.79688		7.79688	-69.7452	-72.3242
2012-12-16 22:18:40	68.57	71.08	21.74	7.80383		7.80383	-69.8981	-72.4567
2012-12-16 22:28:40	68.75	71.24	21.74	7.81077	41259.9	7.81077	-70.0815	-72.6198
2012-12-16 22:38:40	68.91	71.43	21.73	7.81772		7.81772	-70.2446	-72.8135
2012-12-16 22:48:40	69.08	71.59	21.73	7.82466		7.82466	-70.4179	-72.9766
2012-12-16 22:58:40	69.23	71.74	21.73	7.8316		7.8316	-70.5708	-73.1295
2012-12-16 23:08:40	69.36	71.89	21.73	7.83855		7.83855	-70.7034	-73.2824
2012-12-16 23:18:40	69.5	72.02	21.72	7.84549		7.84549	-70.8461	-73.4149
2012-12-16 23:28:40	69.65	72.17	21.72	7.85244	41260	7.85244	-70.999	-73.5678
2012-12-16 23:38:40	69.81	72.32	21.72	7.85938		7.85938	-71.1621	-73.7207
2012-12-16 23:48:40	69.93	72.46	21.71	7.86633		7.86633	-71.2844	-73.8634
2012-12-16 23:58:40	70.1	72.62	21.71	7.87327		7.87327	-71.4577	-74.0265
2012-12-17 00:08:40	70.27	72.77	21.71	7.88022		7.88022	-71.631	-74.1794
2012-12-17 00:18:40	70.41	72.92	21.71	7.88716		7.88716	-71.7737	-74.3323
2012-12-17 00:28:40	70.57	73.08	21.71	7.8941	41260	7.8941	-71.9368	-74.4954
2012-12-17 00:38:40	70.69	73.2	21.7	7.90105		7.90105	-72.0591	-74.6177
2012-12-17 00:48:40	70.84	73.38	21.7	7.90799		7.90799	-72.212	-74.8012
2012-12-17 00:58:40	70.99	73.51	21.7	7.91494		7.91494	-72.3649	-74.9337
2012-12-17 01:08:40	71.17	73.71	21.69	7.92188		7.92188	-72.5484	-75.1376
2012-12-17 01:18:40	71.34	73.85	21.69	7.92883		7.92883	-72.7217	-75.2803
2012-12-17 01:28:40	71.46	73.98	21.68	7.93577	41260.1	7.93577	-72.844	-75.4128
2012-12-17 01:38:40	71.58	74.13	21.68	7.94272		7.94272	-72.9664	-75.5657
2012-12-17 01:48:40	71.78	74.29	21.68	7.94966		7.94966	-73.1702	-75.7288
2012-12-17 01:58:40	71.94	74.45	21.67	7.9566		7.9566	-73.3333	-75.8919
2012-12-17 02:08:40	72.1	74.61	21.67	7.96355		7.96355	-73.4964	-76.055
2012-12-17 02:18:40	72.24	74.77	21.67	7.97049		7.97049	-73.6391	-76.2181
2012-12-17 02:28:40	72.4	74.95	21.67	7.97744	41260.1	7.97744	-73.8022	-76.4016
2012-12-17 02:38:40	72.56	75.1	21.67	7.98438		7.98438	-73.9653	-76.5545
2012-12-17 02:48:40	72.7	75.23	21.67	7.99133		7.99133	-74.1081	-76.6871
2012-12-17 02:58:40	72.85	75.41	21.67	7.99827		7.99827	-74.261	-76.8705
2012-12-17 03:08:40	73.05	75.58	21.67	8.00522		8.00522	-74.4648	-77.0438
2012-12-17 03:18:40	73.13	75.66	21.67	8.01216		8.01216	-74.5464	-77.1254
2012-12-17 03:28:40	73.3	75.86	21.67	8.0191	41260.1	8.0191	-74.7197	-77.3293
2012-12-17 03:38:40	73.48	76.02	21.67	8.02605		8.02605	-74.9032	-77.4924
2012-12-17 03:48:40	73.64	76.18	21.67	8.03299		8.03299	-75.0663	-77.6555
2012-12-17 03:58:40	73.79	76.32	21.67	8.03994		8.03994	-75.2192	-77.7982
2012-12-17 04:08:40	73.82	76.5	21.67	8.04688		8.04688	-75.2497	-77.9817
2012-12-17 04:18:40	74.1	76.65	21.67	8.05383		8.05383	-75.5352	-78.1346
2012-12-17 04:28:40	74.26	76.8	21.67	8.06077	41260.2	8.06077	-75.6983	-78.2875
2012-12-17 04:38:40	74.42	76.97	21.67	8.06772		8.06772	-75.8614	-78.4608
2012-12-17 04:48:40	74.57	77.09	21.68	8.07466		8.07466	-76.0143	-78.5831
2012-12-17 04:58:40	74.73	77.26	21.68	8.0816		8.0816	-76.1774	-78.7564
2012-12-17 05:08:40	74.86	77.42	21.69	8.08855		8.08855	-76.3099	-78.9195
2012-12-17 05:18:40	74.98	77.55	21.69	8.09549		8.09549	-76.4322	-79.052
2012-12-17 05:28:40	75.16	77.7	21.7	8.10244	41260.2	8.10244	-76.6157	-79.2049
2012-12-17 05:38:40	75.26	77.82	21.71	8.10938		8.10938	-76.7176	-79.3272
2012-12-17 05:48:40	75.45	77.98	21.71	8.11633		8.11633	-76.9113	-79.4903
2012-12-17 05:58:40	75.6	78.15	21.72	8.12327		8.12327	-77.0642	-79.6636
2012-12-17 06:08:40	75.72	78.24	21.73	8.13022		8.13022	-77.1865	-79.7554
2012-12-17 06:18:40	75.87	78.42	21.74	8.13716		8.13716	-77.3394	-79.9388
2012-12-17 06:28:40	76.06	78.59	21.75	8.1441	41260.3	8.1441	-77.5331	-80.1121
2012-12-17 06:38:40	76.22	78.75	21.75	8.15105		8.15105	-77.6962	-80.2752
2012-12-17 06:48:40	76.41	78.97	21.76	8.15799		8.15799	-77.8899	-80.4995
2012-12-17 06:58:40	76.6	79.15	21.77	8.16494		8.16494	-78.0836	-80.683
2012-12-17 07:08:40	76.76	79.31	21.77	8.17188		8.17188	-78.2467	-80.8461
2012-12-17 07:18:40	76.91	79.44	21.78	8.17883		8.17883	-78.3996	-80.9786
2012-12-17 07:28:40	76.95	79.62	21.78	8.18577	41260.3	8.18577	-78.4404	-81.1621
2012-12-17 07:38:40	77.23	79.78	21.79	8.19272		8.19272	-78.7258	-81.3252
2012-12-17 07:48:40	77.44	79.95	21.79	8.19966		8.19966	-78.9399	-81.4985
2012-12-17 07:58:40	77.57	80.13	21.8	8.2066		8.2066	-79.0724	-81.682
2012-12-17 08:08:40	77.75	80.3	21.8	8.21355		8.21355	-79.2559	-81.8552
2012-12-17 08:18:40	77.92	80.47	21.81	8.22049		8.22049	-79.4292	-82.0285
2012-12-17 08:28:40	78.1	80.65	21.81	8.22744	41260.4	8.22744	-79.6126	-82.212
2012-12-17 08:38:40	78.24	80.8	21.82	8.23438		8.23438	-79.7554	-82.3649
2012-12-17 08:48:40	78.45	81	21.83	8.24133		8.24133	-79.9694	-82.5688
2012-12-17 08:58:40	78.63	81.17	21.83	8.24827		8.24827	-80.1529	-82.7421
2012-12-17 09:08:40	78.64	81.18	21.82	8.25522		8.25522	-80.1631	-82.7523
2012-12-17 09:18:40	78.86	81.4	21.86	8.26216		8.26216	-80.3874	-82.9766
2012-12-17 09:28:40	79.03	81.58	21.88	8.2691	41260.4	8.2691	-80.5607	-83.16
2012-12-17 09:38:40	79.2	81.76	21.9	8.27605		8.27605	-80.7339	-83.3435
2012-12-17 09:48:40	79.39	81.9	21.93	8.28299		8.28299	-80.9276	-83.4862
2012-12-17 09:58:40	79.56	82.06	21.95	8.28994		8.28994	-81.1009	-83.6493
2012-12-17 10:08:40	79.66	82.19	21.98	8.29688		8.29688	-81.2029	-83.7819
2012-12-17 10:18:40	79.78	82.3	22.01	8.30383		8.30383	-81.3252	-83.894
2012-12-17 10:28:40	79.97	82.54	22.04	8.31077	41260.4	8.31077	-81.5189	-84.1386
2012-12-17 10:38:40	80.19	82.7	22.09	8.31772		8.31772	-81.7431	-84.3017
2012-12-17 10:48:40	80.21	82.36	22.13	8.32466		8.32466	-81.7635	-83.9551
2012-12-17 10:58:40	80.38	82.93	22.22	8.3316		8.3316	-81.9368	-84.5362
2012-12-17 11:08:40	80.61	83.15	22.32	8.33855		8.33855	-82.1713	-84.7604
2012-12-17 11:18:40	80.81	83.34	22.37	8.34549		8.34549	-82.3751	-84.9541
2012-12-17 11:28:40	80.98	83.46	22.41	8.35244	41260.5	8.35244	-82.5484	-85.0765
2012-12-17 11:38:40	81.09	83.58	22.45	8.35938		8.35938	-82.6606	-85.1988
2012-12-17 11:48:40	81.24	83.7	22.49	8.36633		8.36633	-82.8135	-85.3211
2012-12-17 11:58:40	81.34	83.8	22.52	8.37327		8.37327	-82.9154	-85.423
2012-12-17 12:08:40	81.52	84.02	22.54	8.38022		8.38022	-83.0989	-85.6473
2012-12-17 12:18:40	81.71	84.19	22.54	8.38716		8.38716	-83.2926	-85.8206
2012-12-17 12:28:40	81.86	84.34	22.54	8.3941	41260.5	8.3941	-83.4455	-85.9735
2012-12-17 12:38:40	82.04	84.56	22.53	8.40105		8.40105	-83.629	-86.1978
2012-12-17 12:48:40	82.26	84.74	22.51	8.40799		8.40799	-83.8532	-86.3812
2012-12-17 12:58:40	82.41	84.92	22.49	8.41494		8.41494	-84.0061	-86.5647
2012-12-17 13:08:40	82.64	85.13	22.47	8.42188		8.42188	-84.2406	-86.7788
2012-12-17 13:18:40	82.81	85.32	22.44	8.42883		8.42883	-84.4139	-86.9725
2012-12-17 13:28:40	82.99	85.5	22.41	8.43577	41260.6	8.43577	-84.5973	-87.156
2012-12-17 13:38:40	83.11	85.63	22.39	8.44272		8.44272	-84.7197	-87.2885
2012-12-17 13:48:40	83.3	85.82	22.37	8.44966		8.44966	-84.9134	-87.4822
2012-12-17 13:58:40	83.5	86.02	22.36	8.4566		8.4566	-85.1172	-87.686
2012-12-17 14:08:40	83.74	86.26	22.36	8.46355		8.46355	-85.3619	-87.9307
2012-12-17 14:18:40	83.93	86.43	22.37	8.47049		8.47049	-85.5556	-88.104
2012-12-17 14:28:40	84.11	86.61	22.38	8.47744	41260.6	8.47744	-85.739	-88.2875
2012-12-17 14:38:40	84.28	86.75	22.39	8.48438		8.48438	-85.9123	-88.4302
2012-12-17 14:48:40	84.39	86.9	22.4	8.49133		8.49133	-86.0245	-88.5831
2012-12-17 14:58:40	84.56	87.07	22.42	8.49827		8.49827	-86.1978	-88.7564
2012-12-17 15:08:40	84.75	87.26	22.43	8.50522		8.50522	-86.3914	-88.9501
2012-12-17 15:18:40	84.95	87.44	22.45	8.51216		8.51216	-86.5953	-89.1335
2012-12-17 15:28:40	85.11	87.65	22.45	8.5191	41260.6	8.5191	-86.7584	-89.3476
2012-12-17 15:38:40	85.3	87.83	22.45	8.52605		8.52605	-86.9521	-89.5311
2012-12-17 15:48:40	85.52	88.03	22.45	8.53299		8.53299	-87.1764	-89.735
2012-12-17 15:58:40	85.72	88.23	22.43	8.53994		8.53994	-87.3802	-89.9388
2012-12-17 16:08:40	85.91	88.44	22.42	8.54688		8.54688	-87.5739	-90.1529
2012-12-17 16:18:40	86.08	88.6	22.4	8.55383		8.55383	-87.7472	-90.316
2012-12-17 16:28:40	86.27	88.79	22.38	8.56077	41260.7	8.56077	-87.9409	-90.5097
2012-12-17 16:38:40	86.48	88.99	22.36	8.56772		8.56772	-88.1549	-90.7136
2012-12-17 16:48:40	86.66	89.18	22.34	8.57466		8.57466	-88.3384	-90.9072
2012-12-17 16:58:40	86.85	89.38	22.32	8.5816		8.5816	-88.5321	-91.1111
2012-12-17 17:08:40	87	89.59	22.29	8.58855		8.58855	-88.685	-91.3252
2012-12-17 17:18:40	87.24	89.78	22.27	8.59549		8.59549	-88.9297	-91.5189
2012-12-17 17:28:40	87.44	90	22.25	8.60244	41260.7	8.60244	-89.1335	-91.7431
2012-12-17 17:38:40	87.64	90.21	22.23	8.60938		8.60938	-89.3374	-91.9572
2012-12-17 17:48:40	87.84	90.37	22.21	8.61633		8.61633	-89.5413	-92.1203
2012-12-17 17:58:40	88.03	90.59	22.19	8.62327		8.62327	-89.735	-92.3445
2012-12-17 18:08:40	88.22	90.79	22.17	8.63022		8.63022	-89.9286	-92.5484
2012-12-17 18:18:40	88.41	90.98	22.15	8.63716		8.63716	-90.1223	-92.7421
2012-12-17 18:28:40	88.57	91.12	22.14	8.6441	41260.8	8.6441	-90.2854	-92.8848
2012-12-17 18:38:40	88.77	91.36	22.12	8.65105		8.65105	-90.4893	-93.1295
2012-12-17 18:48:40	88.96	91.55	22.1	8.65799		8.65799	-90.683	-93.3231
2012-12-17 18:58:40	89.18	91.74	22.09	8.66494		8.66494	-90.9072	-93.5168
2012-12-17 19:08:40	89.39	91.96	22.08	8.67188		8.67188	-91.1213	-93.7411
2012-12-17 19:18:40	89.55	92.12	22.06	8.67883		8.67883	-91.2844	-93.9042
2012-12-17 19:28:40	89.75	92.34	22.05	8.68577	41260.8	8.68577	-91.4883	-94.1284
2012-12-17 19:38:40	89.96	92.54	22.03	8.69272		8.69272	-91.7023	-94.3323
2012-12-17 19:48:40	90.16	92.75	22.02	8.69966		8.69966	-91.9062	-94.5464
2012-12-17 19:58:40	90.38	92.97	22	8.7066		8.7066	-92.1305	-94.7706
2012-12-17 20:08:40	90.6	93.19	21.99	8.71355		8.71355	-92.3547	-94.9949
2012-12-17 20:18:40	90.81	93.41	21.98	8.72049		8.72049	-92.5688	-95.2192
2012-12-17 20:28:40	91.01	93.62	21.96	8.72744	41260.9	8.72744	-92.7727	-95.4332
2012-12-17 20:38:40	91.23	93.84	21.95	8.73438		8.73438	-92.9969	-95.6575
2012-12-17 20:48:40	91.43	94.07	21.94	8.74133		8.74133	-93.2008	-95.8919
2012-12-17 20:58:40	91.63	94.26	21.92	8.74827		8.74827	-93.4047	-96.0856
2012-12-17 21:08:40	91.81	94.46	21.91	8.75522		8.75522	-93.5882	-96.2895
2012-12-17 21:18:40	92.03	94.66	21.9	8.76216		8.76216	-93.8124	-96.4934
2012-12-17 21:28:40	92.24	94.87	21.88	8.7691	41260.9	8.7691	-94.0265	-96.7074
2012-12-17 21:38:40	92.47	95.09	21.87	8.77605		8.77605	-94.261	-96.9317
2012-12-17 21:48:40	92.64	95.3	21.86	8.78299		8.78299	-94.4343	-97.1458
2012-12-17 21:58:40	92.82	95.49	21.84	8.78994		8.78994	-94.6177	-97.3394
2012-12-17 22:08:40	93.05	95.7	21.83	8.79688		8.79688	-94.8522	-97.5535
2012-12-17 22:18:40	93.24	95.9	21.82	8.80383		8.80383	-95.0459	-97.7574
2012-12-17 22:28:40	93.49	96.14	21.8	8.81077	41260.9	8.81077	-95.3007	-98.002
2012-12-17 22:38:40	93.64	96.32	21.79	8.81772		8.81772	-95.4536	-98.1855
2012-12-17 22:48:40	93.89	96.55	21.78	8.82466		8.82466	-95.7085	-98.42
2012-12-17 22:58:40	94.09	96.74	21.77	8.8316		8.8316	-95.9123	-98.6137
2012-12-17 23:08:40	94.27	96.94	21.76	8.83855		8.83855	-96.0958	-98.8175
2012-12-17 23:18:40	94.52	97.18	21.75	8.84549		8.84549	-96.3507	-99.0622
2012-12-17 23:28:40	94.74	97.41	21.74	8.85244	41261	8.85244	-96.5749	-99.2966
2012-12-17 23:38:40	94.9	97.57	21.73	8.85938		8.85938	-96.738	-99.4597
2012-12-17 23:48:40	95.16	97.79	21.72	8.86633		8.86633	-97.0031	-99.684
2012-12-17 23:58:40	95.36	98	21.71	8.87327		8.87327	-97.2069	-99.8981
2012-12-18 00:08:40	95.57	98.23	21.7	8.88022		8.88022	-97.421	-100.133
2012-12-18 00:18:40	95.74	98.4	21.7	8.88716		8.88716	-97.5943	-100.306
2012-12-18 00:28:40	95.97	98.63	21.69	8.8941	41261	8.8941	-97.8287	-100.54
2012-12-18 00:38:40	96.16	98.84	21.68	8.90105		8.90105	-98.0224	-100.754
2012-12-18 00:48:40	96.39	99.08	21.67	8.90799		8.90799	-98.2569	-100.999
2012-12-18 00:58:40	96.61	99.31	21.67	8.91494		8.91494	-98.4811	-101.233
2012-12-18 01:08:40	96.85	99.54	21.66	8.92188		8.92188	-98.7258	-101.468
2012-12-18 01:18:40	97.04	99.76	21.65	8.92883		8.92883	-98.9195	-101.692
2012-12-18 01:28:40	97.25	99.94	21.65	8.93577	41261.1	8.93577	-99.1335	-101.876
2012-12-18 01:38:40	97.47	100.16	21.64	8.94272		8.94272	-99.3578	-102.1
2012-12-18 01:48:40	97.67	100.37	21.64	8.94966		8.94966	-99.5617	-102.314
2012-12-18 01:58:40	97.89	100.59	21.63	8.9566		8.9566	-99.7859	-102.538
2012-12-18 02:08:40	98.11	100.82	21.62	8.96355		8.96355	-100.01	-102.773
2012-12-18 02:18:40	98.3	101.05	21.62	8.97049		8.97049	-100.204	-103.007
2012-12-18 02:28:40	98.58	101.28	21.61	8.97744	41261.1	8.97744	-100.489	-103.242
2012-12-18 02:38:40	98.8	101.51	21.61	8.98438		8.98438	-100.714	-103.476
2012-12-18 02:48:40	99.02	101.75	21.6	8.99133		8.99133	-100.938	-103.721
2012-12-18 02:58:40	99.24	101.97	21.6	8.99827		8.99827	-101.162	-103.945
2012-12-18 03:08:40	99.47	102.22	21.6	9.00522		9.00522	-101.397	-104.2
2012-12-18 03:18:40	99.73	102.46	21.59	9.01216		9.01216	-101.662	-104.444
2012-12-18 03:28:40	99.91	102.63	21.59	9.0191	41261.1	9.0191	-101.845	-104.618
2012-12-18 03:38:40	100.14	102.87	21.58	9.02605		9.02605	-102.08	-104.862
2012-12-18 03:48:40	100.36	103.1	21.58	9.03299		9.03299	-102.304	-105.097
2012-12-18 03:58:40	100.57	103.29	21.58	9.03994		9.03994	-102.518	-105.291
2012-12-18 04:08:40	100.77	103.5	21.58	9.04688		9.04688	-102.722	-105.505
2012-12-18 04:18:40	101	103.7	21.57	9.05383		9.05383	-102.956	-105.708
2012-12-18 04:28:40	101.22	103.93	21.57	9.06077	41261.2	9.06077	-103.18	-105.943
2012-12-18 04:38:40	101.43	104.17	21.57	9.06772		9.06772	-103.394	-106.188
2012-12-18 04:48:40	101.6	104.37	21.57	9.07466		9.07466	-103.568	-106.391
2012-12-18 04:58:40	101.8	104.58	21.57	9.0816		9.0816	-103.772	-106.606
2012-12-18 05:08:40	102.04	104.81	21.57	9.08855		9.08855	-104.016	-106.84
2012-12-18 05:18:40	102.29	105.04	21.57	9.09549		9.09549	-104.271	-107.074
2012-12-18 05:28:40	102.52	105.28	21.57	9.10244	41261.2	9.10244	-104.506	-107.319
2012-12-18 05:38:40	102.76	105.51	21.57	9.10938		9.10938	-104.75	-107.554
2012-12-18 05:48:40	102.95	105.73	21.57	9.11633		9.11633	-104.944	-107.778
2012-12-18 05:58:40	103.22	105.99	21.57	9.12327		9.12327	-105.219	-108.043
2012-12-18 06:08:40	103.41	106.2	21.57	9.13022		9.13022	-105.413	-108.257
2012-12-18 06:18:40	103.65	106.39	21.58	9.13716		9.13716	-105.657	-108.451
2012-12-18 06:28:40	103.88	106.64	21.58	9.1441	41261.3	9.1441	-105.892	-108.705
2012-12-18 06:38:40	104.12	106.91	21.58	9.15105		9.15105	-106.137	-108.981
2012-12-18 06:48:40	104.32	107.12	21.58	9.15799		9.15799	-106.34	-109.195
2012-12-18 06:58:40	104.57	107.35	21.58	9.16494		9.16494	-106.595	-109.429
2012-12-18 07:08:40	104.76	107.57	21.58	9.17188		9.17188	-106.789	-109.653
2012-12-18 07:18:40	105.03	107.8	21.58	9.17883		9.17883	-107.064	-109.888
2012-12-18 07:28:40	105.25	108.04	21.58	9.18577	41261.3	9.18577	-107.288	-110.133
2012-12-18 07:38:40	105.43	108.22	21.58	9.19272		9.19272	-107.472	-110.316
2012-12-18 07:48:40	105.67	108.49	21.59	9.19966		9.19966	-107.717	-110.591
2012-12-18 07:58:40	105.89	108.69	21.59	9.2066		9.2066	-107.941	-110.795
2012-12-18 08:08:40	106.13	108.88	21.6	9.21355		9.21355	-108.186	-110.989
2012-12-18 08:18:40	106.29	109.13	21.6	9.22049		9.22049	-108.349	-111.244
2012-12-18 08:28:40	105.87	108.98	21.6	9.22744	41261.4	9.22744	-107.92	-111.091
2012-12-18 08:38:40	106.73	109.52	21.62	9.23438		9.23438	-108.797	-111.641
2012-12-18 08:48:40	107.02	109.76	21.66	9.24133		9.24133	-109.093	-111.886
2012-12-18 08:58:40	107.24	109.95	21.68	9.24827		9.24827	-109.317	-112.08
2012-12-18 09:08:40	107.44	110.19	21.7	9.25522		9.25522	-109.521	-112.324
2012-12-18 09:18:40	107.67	110.41	21.71	9.26216		9.26216	-109.755	-112.548
2012-12-18 09:28:40	107.89	110.65	21.73	9.2691	41261.4	9.2691	-109.98	-112.793
2012-12-18 09:38:40	108.1	110.81	21.74	9.27605		9.27605	-110.194	-112.956
2012-12-18 09:48:40	108.26	111.02	21.75	9.28299		9.28299	-110.357	-113.17
2012-12-18 09:58:40	108.51	111.25	21.77	9.28994		9.28994	-110.612	-113.405
2012-12-18 10:08:40	108.74	111.49	21.78	9.29688		9.29688	-110.846	-113.649
2012-12-18 10:18:40	108.96	111.7	21.8	9.30383		9.30383	-111.07	-113.863
2012-12-18 10:28:40	109.18	111.94	21.81	9.31077	41261.4	9.31077	-111.295	-114.108
2012-12-18 10:38:40	109.38	112.14	21.83	9.31772		9.31772	-111.498	-114.312
2012-12-18 10:48:40	109.62	112.34	21.84	9.32466		9.32466	-111.743	-114.516
2012-12-18 10:58:40	109.84	112.56	21.86	9.3316		9.3316	-111.967	-114.74
2012-12-18 11:08:40	110.07	112.82	21.87	9.33855		9.33855	-112.202	-115.005
2012-12-18 11:18:40	110.27	113.02	21.88	9.34549		9.34549	-112.406	-115.209
2012-12-18 11:28:40	110.51	113.28	21.89	9.35244	41261.5	9.35244	-112.65	-115.474
2012-12-18 11:38:40	110.71	113.49	21.9	9.35938		9.35938	-112.854	-115.688
2012-12-18 11:48:40	110.96	113.71	21.91	9.36633		9.36633	-113.109	-115.912
2012-12-18 11:58:40	111.14	113.94	21.92	9.37327		9.37327	-113.293	-116.147
2012-12-18 12:08:40	111.4	114.19	21.93	9.38022		9.38022	-113.558	-116.402
2012-12-18 12:18:40	111.61	114.4	21.94	9.38716		9.38716	-113.772	-116.616
2012-12-18 12:28:40	111.89	114.68	21.94	9.3941	41261.5	9.3941	-114.057	-116.901
2012-12-18 12:38:40	112.13	114.92	21.95	9.40105		9.40105	-114.302	-117.146
2012-12-18 12:48:40	112.38	115.16	21.95	9.40799		9.40799	-114.557	-117.39
2012-12-18 12:58:40	112.56	115.4	21.96	9.41494		9.41494	-114.74	-117.635
2012-12-18 13:08:40	112.85	115.62	21.96	9.42188		9.42188	-115.036	-117.859
2012-12-18 13:18:40	113.07	115.87	21.97	9.42883		9.42883	-115.26	-118.114
2012-12-18 13:28:40	113.31	116.12	21.97	9.43577	41261.6	9.43577	-115.505	-118.369
2012-12-18 13:38:40	113.55	116.36	21.98	9.44272		9.44272	-115.749	-118.614
2012-12-18 13:48:40	113.79	116.54	21.99	9.44966		9.44966	-115.994	-118.797
2012-12-18 13:58:40	113.99	116.82	21.99	9.4566		9.4566	-116.198	-119.083
2012-12-18 14:08:40	114.25	117.06	22	9.46355		9.46355	-116.463	-119.327
2012-12-18 14:18:40	114.48	117.31	22	9.47049		9.47049	-116.697	-119.582
2012-12-18 14:28:40	114.75	117.54	22.01	9.47744	41261.6	9.47744	-116.972	-119.817
2012-12-18 14:38:40	114.96	117.79	22.01	9.48438		9.48438	-117.187	-120.071
2012-12-18 14:48:40	115.2	118.03	22.02	9.49133		9.49133	-117.431	-120.316
2012-12-18 14:58:40	115.47	118.3	22.02	9.49827		9.49827	-117.706	-120.591
2012-12-18 15:08:40	115.7	118.52	22.03	9.50522		9.50522	-117.941	-120.815
2012-12-18 15:18:40	115.9	118.79	22.03	9.51216		9.51216	-118.145	-121.091
2012-12-18 15:28:40	116.16	119.04	22.04	9.5191	41261.6	9.5191	-118.41	-121.346
2012-12-18 15:38:40	116.43	119.3	22.05	9.52605		9.52605	-118.685	-121.611
2012-12-18 15:48:40	116.7	119.54	22.05	9.53299		9.53299	-118.96	-121.855
2012-12-18 15:58:40	116.93	119.8	22.06	9.53994		9.53994	-119.195	-122.12
2012-12-18 16:08:40	117.19	120.01	22.06	9.54688		9.54688	-119.46	-122.334
2012-12-18 16:18:40	117.33	120.28	22.07	9.55383		9.55383	-119.602	-122.61
2012-12-18 16:28:40	117.69	120.58	22.07	9.56077	41261.7	9.56077	-119.969	-122.915
2012-12-18 16:38:40	117.88	120.53	22.08	9.56772		9.56772	-120.163	-122.864
2012-12-18 16:48:40	118.21	120.82	22.11	9.57466		9.57466	-120.499	-123.16
2012-12-18 16:58:40	118.48	121.09	22.12	9.5816		9.5816	-120.775	-123.435
2012-12-18 17:08:40	118.75	121.35	22.13	9.58855		9.58855	-121.05	-123.7
2012-12-18 17:18:40	118.99	121.62	22.14	9.59549		9.59549	-121.295	-123.976
2012-12-18 17:28:40	119.24	121.86	22.14	9.60244	41261.7	9.60244	-121.549	-124.22
2012-12-18 17:38:40	119.48	122.1	22.15	9.60938		9.60938	-121.794	-124.465
2012-12-18 17:48:40	119.75	122.21	22.16	9.61633		9.61633	-122.069	-124.577
2012-12-18 17:58:40	120.03	122.63	22.16	9.62327		9.62327	-122.355	-125.005
2012-12-18 18:08:40	120.28	122.87	22.17	9.63022		9.63022	-122.61	-125.25
2012-12-18 18:18:40	120.51	123.08	22.17	9.63716		9.63716	-122.844	-125.464
2012-12-18 18:28:40	120.69	123.3	22.18	9.6441	41261.8	9.6441	-123.028	-125.688
2012-12-18 18:38:40	120.93	123.57	22.18	9.65105		9.65105	-123.272	-125.963
2012-12-18 18:48:40	121.22	123.85	22.19	9.65799		9.65799	-123.568	-126.249
2012-12-18 18:58:40	121.51	124.12	22.19	9.66494		9.66494	-123.863	-126.524
2012-12-18 19:08:40	121.77	124.35	22.19	9.67188		9.67188	-124.128	-126.758
2012-12-18 19:18:40	122.02	124.63	22.2	9.67883		9.67883	-124.383	-127.044
2012-12-18 19:28:40	122.23	124.88	22.2	9.68577	41261.8	9.68577	-124.597	-127.299
2012-12-18 19:38:40	122.49	125.12	22.2	9.69272		9.69272	-124.862	-127.543
2012-12-18 19:48:40	122.72	125.35	22.2	9.69966		9.69966	-125.097	-127.778
2012-12-18 19:58:40	122.95	125.59	22.2	9.7066		9.7066	-125.331	-128.022
2012-12-18 20:08:40	123.15	125.81	22.2	9.71355		9.71355	-125.535	-128.247
2012-12-18 20:18:40	123.42	126.1	22.2	9.72049		9.72049	-125.81	-128.542
2012-12-18 20:28:40	123.72	126.35	22.2	9.72744	41261.9	9.72744	-126.116	-128.797
2012-12-18 20:38:40	123.92	126.63	22.2	9.73438		9.73438	-126.32	-129.083
2012-12-18 20:48:40	124.23	126.92	22.19	9.74133		9.74133	-126.636	-129.378
2012-12-18 20:58:40	124.49	127.18	22.19	9.74827		9.74827	-126.901	-129.643
2012-12-18 21:08:40	124.75	127.46	22.19	9.75522		9.75522	-127.166	-129.929
2012-12-18 21:18:40	124.99	127.69	22.18	9.76216		9.76216	-127.411	-130.163
2012-12-18 21:28:40	125.24	127.94	22.18	9.7691	41261.9	9.7691	-127.666	-130.418
2012-12-18 21:38:40	125.47	128.21	22.17	9.77605		9.77605	-127.9	-130.693
2012-12-18 21:48:40	125.72	128.49	22.17	9.78299		9.78299	-128.155	-130.979
2012-12-18 21:58:40	126.01	128.72	22.16	9.78994		9.78994	-128.451	-131.213
2012-12-18 22:08:40	126.22	128.99	22.16	9.79688		9.79688	-128.665	-131.488
2012-12-18 22:18:40	126.54	129.07	22.16	9.80383		9.80383	-128.991	-131.57
2012-12-18 22:28:40	126.78	129.47	22.15	9.81077	41261.9	9.81077	-129.235	-131.978
2012-12-18 22:38:40	127.02	129.79	22.15	9.81772		9.81772	-129.48	-132.304
2012-12-18 22:48:40	127.28	129.95	22.15	9.82466		9.82466	-129.745	-132.467
2012-12-18 22:58:40	127.53	130.32	22.14	9.8316		9.8316	-130	-132.844
2012-12-18 23:08:40	127.81	130.57	22.14	9.83855		9.83855	-130.285	-133.099
2012-12-18 23:18:40	128.07	130.82	22.13	9.84549		9.84549	-130.55	-133.354
2012-12-18 23:28:40	128.34	131.1	22.13	9.85244	41262	9.85244	-130.826	-133.639
2012-12-18 23:38:40	128.61	131.39	22.13	9.85938		9.85938	-131.101	-133.935
2012-12-18 23:48:40	128.86	131.64	22.12	9.86633		9.86633	-131.356	-134.19
2012-12-18 23:58:40	129.13	131.9	22.12	9.87327		9.87327	-131.631	-134.455
2012-12-19 00:08:40	129.37	132.15	22.12	9.88022		9.88022	-131.876	-134.709
2012-12-19 00:18:40	129.65	132.46	22.11	9.88716		9.88716	-132.161	-135.025
2012-12-19 00:28:40	129.89	132.7	22.11	9.8941	41262	9.8941	-132.406	-135.27
2012-12-19 00:38:40	130.17	132.95	22.11	9.90105		9.90105	-132.691	-135.525
2012-12-19 00:48:40	130.41	133.23	22.11	9.90799		9.90799	-132.936	-135.81
2012-12-19 00:58:40	130.67	133.48	22.11	9.91494		9.91494	-133.201	-136.065
2012-12-19 01:08:40	130.94	133.79	22.1	9.92188		9.92188	-133.476	-136.381
2012-12-19 01:18:40	131.21	134.07	22.1	9.92883		9.92883	-133.751	-136.667
2012-12-19 01:28:40	131.47	134.32	22.1	9.93577	41262.1	9.93577	-134.016	-136.922
2012-12-19 01:38:40	131.76	134.58	22.1	9.94272		9.94272	-134.312	-137.187
2012-12-19 01:48:40	132.01	134.88	22.1	9.94966		9.94966	-134.567	-137.492
2012-12-19 01:58:40	132.24	135.13	22.1	9.9566		9.9566	-134.801	-137.747
2012-12-19 02:08:40	132.55	135.39	22.1	9.96355		9.96355	-135.117	-138.012
2012-12-19 02:18:40	132.82	135.68	22.1	9.97049		9.97049	-135.392	-138.308
2012-12-19 02:28:40	133.06	135.94	22.1	9.97744	41262.1	9.97744	-135.637	-138.573
2012-12-19 02:38:40	133.33	136.2	22.1	9.98438		9.98438	-135.912	-138.838
2012-12-19 02:48:40	133.61	136.45	22.09	9.99133		9.99133	-136.198	-139.093
2012-12-19 02:58:40	133.85	136.73	22.09	9.99827		9.99827	-136.442	-139.378
2012-12-19 03:08:40	134.08	136.97	22.09	10.0052		10.0052	-136.677	-139.623
2012-12-19 03:18:40	134.37	137.22	22.09	10.0122		10.0122	-136.972	-139.878
2012-12-19 03:28:40	134.63	137.51	22.09	10.0191	41262.1	10.0191	-137.238	-140.173
2012-12-19 03:38:40	134.89	137.8	22.09	10.026		10.026	-137.503	-140.469
2012-12-19 03:48:40	135.12	138.05	22.09	10.033		10.033	-137.737	-140.724
2012-12-19 03:58:40	135.38	138.32	22.09	10.0399		10.0399	-138.002	-140.999
2012-12-19 04:08:40	135.68	138.61	22.09	10.0469		10.0469	-138.308	-141.295
2012-12-19 04:18:40	135.94	138.87	22.09	10.0538		10.0538	-138.573	-141.56
2012-12-19 04:28:40	136.22	139.09	22.09	10.0608	41262.2	10.0608	-138.858	-141.784
2012-12-19 04:38:40	136.46	139.42	22.09	10.0677		10.0677	-139.103	-142.12
2012-12-19 04:48:40	136.73	139.67	22.09	10.0747		10.0747	-139.378	-142.375
2012-12-19 04:58:40	136.98	139.97	22.09	10.0816		10.0816	-139.633	-142.681
2012-12-19 05:08:40	137.26	140.21	22.09	10.0885		10.0885	-139.918	-142.926
2012-12-19 05:18:40	137.48	140.49	22.09	10.0955		10.0955	-140.143	-143.211
2012-12-19 05:28:40	137.75	140.74	22.09	10.1024	41262.2	10.1024	-140.418	-143.466
2012-12-19 05:38:40	138.01	141.01	22.09	10.1094		10.1094	-140.683	-143.741
2012-12-19 05:48:40	138.28	141.29	22.09	10.1163		10.1163	-140.958	-144.027
2012-12-19 05:58:40	138.56	141.59	22.09	10.1233		10.1233	-141.244	-144.332
2012-12-19 06:08:40	138.82	141.85	22.09	10.1302		10.1302	-141.509	-144.597
2012-12-19 06:18:40	139.08	142.14	22.09	10.1372		10.1372	-141.774	-144.893
2012-12-19 06:28:40	139.37	142.35	22.09	10.1441	41262.3	10.1441	-142.069	-145.107
2012-12-19 06:38:40	139.62	142.68	22.09	10.151		10.151	-142.324	-145.443
2012-12-19 06:48:40	139.86	142.94	22.09	10.158		10.158	-142.569	-145.708
2012-12-19 06:58:40	140.15	143.21	22.09	10.1649		10.1649	-142.864	-145.984
2012-12-19 07:08:40	140.4	143.51	22.09	10.1719		10.1719	-143.119	-146.29
2012-12-19 07:18:40	140.65	143.75	22.09	10.1788		10.1788	-143.374	-146.534
2012-12-19 07:28:40	140.91	144.05	22.08	10.1858	41262.3	10.1858	-143.639	-146.84
2012-12-19 07:38:40	141.17	144.32	22.09	10.1927		10.1927	-143.904	-147.115
2012-12-19 07:48:40	141.45	144.6	22.09	10.1997		10.1997	-144.19	-147.401
2012-12-19 07:58:40	141.69	144.87	22.09	10.2066		10.2066	-144.434	-147.676
2012-12-19 08:08:40	141.96	145.16	22.09	10.2135		10.2135	-144.709	-147.971
2012-12-19 08:18:40	142.17	145.41	22.1	10.2205		10.2205	-144.924	-148.226
2012-12-19 08:28:40	142.46	145.61	22.14	10.2274	41262.4	10.2274	-145.219	-148.43
2012-12-19 08:38:40	142.7	145.87	22.16	10.2344		10.2344	-145.464	-148.695
2012-12-19 08:48:40	142.92	146.13	22.16	10.2413		10.2413	-145.688	-148.96
2012-12-19 08:58:40	143.15	146.4	22.17	10.2483		10.2483	-145.923	-149.235
2012-12-19 09:08:40	143.42	146.69	22.17	10.2552		10.2552	-146.198	-149.531
2012-12-19 09:18:40	143.64	146.9	22.17	10.2622		10.2622	-146.422	-149.745
2012-12-19 09:28:40	143.89	147.18	22.17	10.2691	41262.4	10.2691	-146.677	-150.031
2012-12-19 09:38:40	144.19	147.46	22.17	10.276		10.276	-146.983	-150.316
2012-12-19 09:48:40	144.43	147.68	22.18	10.283		10.283	-147.227	-150.54
2012-12-19 09:58:40	144.69	147.93	22.18	10.2899		10.2899	-147.492	-150.795
2012-12-19 10:08:40	144.95	148.22	22.18	10.2969		10.2969	-147.757	-151.091
2012-12-19 10:18:40	145.15	148.44	22.19	10.3038		10.3038	-147.961	-151.315
2012-12-19 10:28:40	145.41	148.76	22.19	10.3108	41262.4	10.3108	-148.226	-151.641
2012-12-19 10:38:40	145.68	149.01	22.2	10.3177		10.3177	-148.502	-151.896
2012-12-19 10:48:40	145.93	149.24	22.2	10.3247		10.3247	-148.756	-152.13
2012-12-19 10:58:40	146.18	149.5	22.21	10.3316		10.3316	-149.011	-152.396
2012-12-19 11:08:40	146.45	149.73	22.21	10.3385		10.3385	-149.286	-152.63
2012-12-19 11:18:40	146.68	150.05	22.21	10.3455		10.3455	-149.521	-152.956
2012-12-19 11:28:40	146.92	150.29	22.22	10.3524	41262.5	10.3524	-149.766	-153.201
2012-12-19 11:38:40	147.16	150.56	22.22	10.3594		10.3594	-150.01	-153.476
2012-12-19 11:48:40	147.42	150.84	22.22	10.3663		10.3663	-150.275	-153.761
2012-12-19 11:58:40	147.69	151.09	22.22	10.3733		10.3733	-150.55	-154.016
2012-12-19 12:08:40	147.92	151.35	22.22	10.3802		10.3802	-150.785	-154.281
2012-12-19 12:18:40	148.19	151.63	22.22	10.3872		10.3872	-151.06	-154.567
2012-12-19 12:28:40	148.45	151.87	22.22	10.3941	41262.5	10.3941	-151.325	-154.811
2012-12-19 12:38:40	148.7	152.16	22.22	10.401		10.401	-151.58	-155.107
2012-12-19 12:48:40	148.96	152.42	22.22	10.408		10.408	-151.845	-155.372
2012-12-19 12:58:40	149.21	152.67	22.22	10.4149		10.4149	-152.1	-155.627
2012-12-19 13:08:40	149.45	152.87	22.22	10.4219		10.4219	-152.345	-155.831
2012-12-19 13:18:40	149.68	153.09	22.22	10.4288		10.4288	-152.579	-156.055
2012-12-19 13:28:40	149.9	153.39	22.22	10.4358	41262.6	10.4358	-152.803	-156.361
2012-12-19 13:38:40	150.16	153.63	22.22	10.4427		10.4427	-153.068	-156.606
2012-12-19 13:48:40	150.41	153.85	22.22	10.4497		10.4497	-153.323	-156.83
2012-12-19 13:58:40	150.66	154.13	22.22	10.4566		10.4566	-153.578	-157.115
2012-12-19 14:08:40	150.9	154.42	22.21	10.4635		10.4635	-153.823	-157.411
2012-12-19 14:18:40	151.12	154.66	22.21	10.4705		10.4705	-154.047	-157.655
2012-12-19 14:28:40	151.36	154.93	22.21	10.4774	41262.6	10.4774	-154.292	-157.931
2012-12-19 14:38:40	151.59	155.16	22.21	10.4844		10.4844	-154.526	-158.165
2012-12-19 14:48:40	151.83	155.39	22.21	10.4913		10.4913	-154.771	-158.4
2012-12-19 14:58:40	152.02	155.61	22.21	10.4983		10.4983	-154.964	-158.624
2012-12-19 15:08:40	152.25	155.91	22.21	10.5052		10.5052	-155.199	-158.93
2012-12-19 15:18:40	152.5	156.16	22.21	10.5122		10.5122	-155.454	-159.185
2012-12-19 15:28:40	152.76	156.42	22.21	10.5191	41262.6	10.5191	-155.719	-159.45
2012-12-19 15:38:40	152.98	156.65	22.21	10.526		10.526	-155.943	-159.684
2012-12-19 15:48:40	153.21	156.89	22.21	10.533		10.533	-156.177	-159.929
2012-12-19 15:58:40	153.43	157.15	22.21	10.5399		10.5399	-156.402	-160.194
2012-12-19 16:08:40	153.66	157.38	22.21	10.5469		10.5469	-156.636	-160.428
2012-12-19 16:18:40	153.87	157.61	22.21	10.5538		10.5538	-156.85	-160.663
2012-12-19 16:28:40	154.11	157.85	22.21	10.5608	41262.7	10.5608	-157.095	-160.907
2012-12-19 16:38:40	154.34	158.06	22.21	10.5677		10.5677	-157.329	-161.121
2012-12-19 16:48:40	153.97	157.91	22.2	10.5747		10.5747	-156.952	-160.968
2012-12-19 16:58:40	154.71	158.32	22.23	10.5816		10.5816	-157.706	-161.386
2012-12-19 17:08:40	155.01	158.58	22.24	10.5885		10.5885	-158.012	-161.651
2012-12-19 17:18:40	155.23	158.81	22.25	10.5955		10.5955	-158.236	-161.886
2012-12-19 17:28:40	155.5	159.08	22.24	10.6024	41262.7	10.6024	-158.512	-162.161
2012-12-19 17:38:40	155.73	159.33	22.24	10.6094		10.6094	-158.746	-162.416
2012-12-19 17:48:40	155.94	159.54	22.24	10.6163		10.6163	-158.96	-162.63
2012-12-19 17:58:40	156.19	159.79	22.23	10.6233		10.6233	-159.215	-162.885
2012-12-19 18:08:40	156.38	160	22.23	10.6302		10.6302	-159.409	-163.099
2012-12-19 18:18:40	156.65	160.25	22.22	10.6372		10.6372	-159.684	-163.354
2012-12-19 18:28:40	156.86	160.48	22.22	10.6441	41262.8	10.6441	-159.898	-163.588
2012-12-19 18:38:40	157.1	160.76	22.21	10.651		10.651	-160.143	-163.874
2012-12-19 18:48:40	157.3	160.97	22.2	10.658		10.658	-160.347	-164.088
2012-12-19 18:58:40	157.51	161.22	22.2	10.6649		10.6649	-160.561	-164.343
2012-12-19 19:08:40	157.74	161.42	22.19	10.6719		10.6719	-160.795	-164.546
2012-12-19 19:18:40	157.98	161.68	22.18	10.6788		10.6788	-161.04	-164.811
2012-12-19 19:28:40	158.19	161.93	22.17	10.6858	41262.8	10.6858	-161.254	-165.066
2012-12-19 19:38:40	158.43	162.17	22.16	10.6927		10.6927	-161.498	-165.311
2012-12-19 19:48:40	158.65	162.41	22.15	10.6997		10.6997	-161.723	-165.556
2012-12-19 19:58:40	158.85	162.64	22.13	10.7066		10.7066	-161.927	-165.79
2012-12-19 20:08:40	159.09	162.87	22.12	10.7135		10.7135	-162.171	-166.024
2012-12-19 20:18:40	159.31	163.14	22.11	10.7205		10.7205	-162.396	-166.3
2012-12-19 20:28:40	159.54	163.38	22.09	10.7274	41262.9	10.7274	-162.63	-166.544
2012-12-19 20:38:40	159.76	163.6	22.08	10.7344		10.7344	-162.854	-166.769
2012-12-19 20:48:40	159.99	163.88	22.07	10.7413		10.7413	-163.089	-167.054
2012-12-19 20:58:40	160.2	164.1	22.06	10.7483		10.7483	-163.303	-167.278
2012-12-19 21:08:40	160.48	164.36	22.04	10.7552		10.7552	-163.588	-167.543
2012-12-19 21:18:40	160.65	164.6	22.03	10.7622		10.7622	-163.761	-167.788
2012-12-19 21:28:40	160.92	164.85	22.02	10.7691	41262.9	10.7691	-164.037	-168.043
2012-12-19 21:38:40	161.08	165.08	22	10.776		10.776	-164.2	-168.277
2012-12-19 21:48:40	161.37	165.3	21.99	10.783		10.783	-164.495	-168.502
2012-12-19 21:58:40	161.57	165.49	21.98	10.7899		10.7899	-164.699	-168.695
2012-12-19 22:08:40	161.79	165.74	21.96	10.7969		10.7969	-164.924	-168.95
2012-12-19 22:18:40	162.01	166	21.95	10.8038		10.8038	-165.148	-169.215
2012-12-19 22:28:40	162.25	166.26	21.93	10.8108	41262.9	10.8108	-165.392	-169.48
2012-12-19 22:38:40	162.46	166.48	21.92	10.8177		10.8177	-165.607	-169.704
2012-12-19 22:48:40	162.71	166.71	21.91	10.8247		10.8247	-165.861	-169.939
2012-12-19 22:58:40	162.77	166.92	21.89	10.8316		10.8316	-165.923	-170.153
2012-12-19 23:08:40	163.11	167.14	21.88	10.8385		10.8385	-166.269	-170.377
2012-12-19 23:18:40	163.3	167.37	21.87	10.8455		10.8455	-166.463	-170.612
2012-12-19 23:28:40	163.49	167.58	21.86	10.8524	41263	10.8524	-166.656	-170.826
2012-12-19 23:38:40	163.69	167.77	21.86	10.8594		10.8594	-166.86	-171.019
2012-12-19 23:48:40	163.85	167.91	21.86	10.8663		10.8663	-167.023	-171.162
2012-12-19 23:58:40	164.02	168.06	21.86	10.8733		10.8733	-167.197	-171.315
2012-12-20 00:08:40	164.23	168.39	21.86	10.8802		10.8802	-167.411	-171.651
2012-12-20 00:18:40	164.43	168.62	21.86	10.8872		10.8872	-167.615	-171.886
2012-12-20 00:28:40	164.61	168.86	21.86	10.8941	41263	10.8941	-167.798	-172.13
2012-12-20 00:38:40	164.81	169.08	21.86	10.901		10.901	-168.002	-172.355
2012-12-20 00:48:40	165	169.31	21.85	10.908		10.908	-168.196	-172.589
2012-12-20 00:58:40	165.21	169.58	21.85	10.9149		10.9149	-168.41	-172.864
2012-12-20 01:08:40	165.38	169.78	21.84	10.9219		10.9219	-168.583	-173.068
2012-12-20 01:18:40	165.61	170	21.83	10.9288		10.9288	-168.818	-173.293
2012-12-20 01:28:40	165.83	170.23	21.82	10.9358	41263.1	10.9358	-169.042	-173.527
2012-12-20 01:38:40	166.03	170.45	21.81	10.9427		10.9427	-169.246	-173.751
2012-12-20 01:48:40	166.19	170.69	21.79	10.9497		10.9497	-169.409	-173.996
2012-12-20 01:58:40	166.41	170.94	21.78	10.9566		10.9566	-169.633	-174.251
2012-12-20 02:08:40	166.61	171.15	21.77	10.9635		10.9635	-169.837	-174.465
2012-12-20 02:18:40	166.8	171.38	21.76	10.9705		10.9705	-170.031	-174.699
2012-12-20 02:28:40	167	171.59	21.75	10.9774	41263.1	10.9774	-170.234	-174.913
2012-12-20 02:38:40	167.2	171.8	21.74	10.9844		10.9844	-170.438	-175.127
2012-12-20 02:48:40	167.38	172	21.74	10.9913		10.9913	-170.622	-175.331
2012-12-20 02:58:40	167.59	172.23	21.73	10.9983		10.9983	-170.836	-175.566
2012-12-20 03:08:40	167.78	172.45	21.73	11.0052		11.0052	-171.03	-175.79
2012-12-20 03:18:40	167.99	172.68	21.72	11.0122		11.0122	-171.244	-176.024
2012-12-20 03:28:40	168.17	172.89	21.72	11.0191	41263.1	11.0191	-171.427	-176.239
2012-12-20 03:38:40	168.37	173.11	21.71	11.026		11.026	-171.631	-176.463
2012-12-20 03:48:40	168.55	173.34	21.71	11.033		11.033	-171.814	-176.697
2012-12-20 03:58:40	168.74	173.57	21.71	11.0399		11.0399	-172.008	-176.932
2012-12-20 04:08:40	168.93	173.78	21.7	11.0469		11.0469	-172.202	-177.146
2012-12-20 04:18:40	169.12	174.01	21.7	11.0538		11.0538	-172.396	-177.38
2012-12-20 04:28:40	169.34	174.22	21.69	11.0608	41263.2	11.0608	-172.62	-177.594
2012-12-20 04:38:40	169.52	174.45	21.69	11.0677		11.0677	-172.803	-177.829
2012-12-20 04:48:40	169.72	174.66	21.68	11.0747		11.0747	-173.007	-178.043
2012-12-20 04:58:40	169.88	174.87	21.68	11.0816		11.0816	-173.17	-178.257
2012-12-20 05:08:40	170.09	175.07	21.67	11.0885		11.0885	-173.384	-178.461
2012-12-20 05:18:40	170.26	175.32	21.67	11.0955		11.0955	-173.558	-178.716
2012-12-20 05:28:40	170.47	175.54	21.66	11.1024	41263.2	11.1024	-173.772	-178.94
2012-12-20 05:38:40	170.64	175.75	21.66	11.1094		11.1094	-173.945	-179.154
2012-12-20 05:48:40	170.84	175.98	21.66	11.1163		11.1163	-174.149	-179.388
2012-12-20 05:58:40	171.02	176.22	21.65	11.1233		11.1233	-174.332	-179.633
2012-12-20 06:08:40	171.22	176.43	21.65	11.1302		11.1302	-174.536	-179.847
2012-12-20 06:18:40	171.42	176.64	21.65	11.1372		11.1372	-174.74	-180.061
2012-12-20 06:28:40	171.6	176.85	21.65	11.1441	41263.3	11.1441	-174.924	-180.275
2012-12-20 06:38:40	171.79	177.09	21.65	11.151		11.151	-175.117	-180.52
2012-12-20 06:48:40	171.96	177.32	21.65	11.158		11.158	-175.291	-180.754
2012-12-20 06:58:40	172.18	177.53	21.65	11.1649		11.1649	-175.515	-180.968
2012-12-20 07:08:40	172.33	177.77	21.64	11.1719		11.1719	-175.668	-181.213
2012-12-20 07:18:40	172.54	178.02	21.64	11.1788		11.1788	-175.882	-181.468
2012-12-20 07:28:40	172.71	178.23	21.64	11.1858	41263.3	11.1858	-176.055	-181.682
2012-12-20 07:38:40	172.86	178.44	21.65	11.1927		11.1927	-176.208	-181.896
2012-12-20 07:48:40	173.03	178.57	21.65	11.1997		11.1997	-176.381	-182.029
2012-12-20 07:58:40	173.19	178.83	21.66	11.2066		11.2066	-176.544	-182.294
2012-12-20 08:08:40	173.33	179.09	21.67	11.2135		11.2135	-176.687	-182.559
2012-12-20 08:18:40	173.49	179.29	21.69	11.2205		11.2205	-176.85	-182.762
2012-12-20 08:28:40	172.58	179.12	21.69	11.2274	41263.4	11.2274	-175.923	-182.589
2012-12-20 08:38:40	173.85	179.73	21.73	11.2344		11.2344	-177.217	-183.211
2012-12-20 08:48:40	174.04	179.95	21.76	11.2413		11.2413	-177.411	-183.435
2012-12-20 08:58:40	174.23	180.19	21.79	11.2483		11.2483	-177.604	-183.68
2012-12-20 09:08:40	174.37	180.39	21.81	11.2552		11.2552	-177.747	-183.884
2012-12-20 09:18:40	174.55	180.67	21.82	11.2622		11.2622	-177.931	-184.169
2012-12-20 09:28:40	174.75	180.87	21.82	11.2691	41263.4	11.2691	-178.135	-184.373
2012-12-20 09:38:40	174.93	181.16	21.83	11.276		11.276	-178.318	-184.669
2012-12-20 09:48:40	175.18	181.41	21.83	11.283		11.283	-178.573	-184.924
2012-12-20 09:58:40	175.39	181.62	21.83	11.2899		11.2899	-178.787	-185.138
2012-12-20 10:08:40	175.57	181.85	21.82	11.2969		11.2969	-178.97	-185.372
2012-12-20 10:18:40	175.78	182.04	21.82	11.3038		11.3038	-179.185	-185.566
2012-12-20 10:28:40	175.96	182.25	21.82	11.3108	41263.4	11.3108	-179.368	-185.78
2012-12-20 10:38:40	176.1	182.42	21.82	11.3177		11.3177	-179.511	-185.953
2012-12-20 10:48:40	176.26	182.55	21.84	11.3247		11.3247	-179.674	-186.086
2012-12-20 10:58:40	176.37	182.77	21.86	11.3316		11.3316	-179.786	-186.31
2012-12-20 11:08:40	176.51	182.95	21.88	11.3385		11.3385	-179.929	-186.493
2012-12-20 11:18:40	176.62	183.11	21.92	11.3455		11.3455	-180.041	-186.656
2012-12-20 11:28:40	176.73	183.31	21.95	11.3524	41263.5	11.3524	-180.153	-186.86
2012-12-20 11:38:40	175.73	183.17	21.99	11.3594		11.3594	-179.134	-186.718
2012-12-20 11:48:40	176.96	183.65	22.04	11.3663		11.3663	-180.387	-187.207
2012-12-20 11:58:40	177.02	183.87	22.11	11.3733		11.3733	-180.449	-187.431
2012-12-20 12:08:40	175.3	182.08	22.18	11.3802		11.3802	-178.695	-185.607
2012-12-20 12:18:40	177.2	184.03	22.35	11.3872		11.3872	-180.632	-187.594
2012-12-20 12:28:40	177.51	184.41	22.46	11.3941	41263.5	11.3941	-180.948	-187.982
2012-12-20 12:38:40	177.78	184.78	22.5	11.401		11.401	-181.223	-188.359
2012-12-20 12:48:40	178.05	185.07	22.52	11.408		11.408	-181.498	-188.654
2012-12-20 12:58:40	178.27	185.39	22.51	11.4149		11.4149	-181.723	-188.981
2012-12-20 13:08:40	178.53	185.68	22.49	11.4219		11.4219	-181.988	-189.276
2012-12-20 13:18:40	178.76	186	22.47	11.4288		11.4288	-182.222	-189.602
2012-12-20 13:28:40	179.05	186.31	22.44	11.4358	41263.6	11.4358	-182.518	-189.918
2012-12-20 13:38:40	178.99	186.48	22.41	11.4427		11.4427	-182.457	-190.092
2012-12-20 13:48:40	179.51	186.95	22.37	11.4497		11.4497	-182.987	-190.571
2012-12-20 13:58:40	179.74	187.23	22.34	11.4566		11.4566	-183.221	-190.856
2012-12-20 14:08:40	179.96	187.54	22.31	11.4635		11.4635	-183.445	-191.172
2012-12-20 14:18:40	180.19	187.84	22.28	11.4705		11.4705	-183.68	-191.478
2012-12-20 14:28:40	180.39	188.13	22.25	11.4774	41263.6	11.4774	-183.884	-191.774
2012-12-20 14:38:40	180.62	188.42	22.22	11.4844		11.4844	-184.118	-192.069
2012-12-20 14:48:40	180.82	188.52	22.19	11.4913		11.4913	-184.322	-192.171
2012-12-20 14:58:40	181.04	188.92	22.17	11.4983		11.4983	-184.546	-192.579
2012-12-20 15:08:40	181.25	189.24	22.15	11.5052		11.5052	-184.76	-192.905
2012-12-20 15:18:40	181.46	189.56	22.13	11.5122		11.5122	-184.975	-193.231
2012-12-20 15:28:40	181.66	189.8	22.11	11.5191	41263.6	11.5191	-185.178	-193.476
2012-12-20 15:38:40	181.85	190.11	22.09	11.526		11.526	-185.372	-193.792
2012-12-20 15:48:40	182.01	190.43	22.07	11.533		11.533	-185.535	-194.118
2012-12-20 15:58:40	182.24	190.69	22.06	11.5399		11.5399	-185.77	-194.383
2012-12-20 16:08:40	182.4	190.99	22.04	11.5469		11.5469	-185.933	-194.689
2012-12-20 16:18:40	182.61	191.29	22.02	11.5538		11.5538	-186.147	-194.995
2012-12-20 16:28:40	182.81	191.56	22.01	11.5608	41263.7	11.5608	-186.351	-195.27
2012-12-20 16:38:40	183.03	191.82	21.99	11.5677		11.5677	-186.575	-195.535
2012-12-20 16:48:40	183.23	192.05	21.98	11.5747		11.5747	-186.779	-195.77
2012-12-20 16:58:40	183.41	192.38	21.97	11.5816		11.5816	-186.962	-196.106
2012-12-20 17:08:40	183.62	192.67	21.95	11.5885		11.5885	-187.176	-196.402
2012-12-20 17:18:40	183.76	192.88	21.94	11.5955		11.5955	-187.319	-196.616
2012-12-20 17:28:40	182.8	192.37	21.91	11.6024	41263.7	11.6024	-186.34	-196.096
2012-12-20 17:38:40	184.15	193.38	21.92	11.6094		11.6094	-187.717	-197.125
2012-12-20 17:48:40	184.38	193.6	21.91	11.6163		11.6163	-187.951	-197.35
2012-12-20 17:58:40	184.61	193.93	21.91	11.6233		11.6233	-188.186	-197.686
2012-12-20 18:08:40	184.77	194.17	21.9	11.6302		11.6302	-188.349	-197.931
2012-12-20 18:18:40	185	194.47	21.89	11.6372		11.6372	-188.583	-198.236
2012-12-20 18:28:40	185.19	194.73	21.88	11.6441	41263.8	11.6441	-188.777	-198.502
2012-12-20 18:38:40	185.37	195.02	21.86	11.651		11.651	-188.96	-198.797
2012-12-20 18:48:40	185.56	195.2	21.85	11.658		11.658	-189.154	-198.981
2012-12-20 18:58:40	185.77	195.49	21.84	11.6649		11.6649	-189.368	-199.276
2012-12-20 19:08:40	185.96	195.77	21.83	11.6719		11.6719	-189.562	-199.562
2012-12-20 19:18:40	186.14	195.98	21.81	11.6788		11.6788	-189.745	-199.776
2012-12-20 19:28:40	186.35	196.28	21.8	11.6858	41263.8	11.6858	-189.959	-200.082
2012-12-20 19:38:40	186.54	196.57	21.79	11.6927		11.6927	-190.153	-200.377
2012-12-20 19:48:40	186.72	196.76	21.78	11.6997		11.6997	-190.336	-200.571
2012-12-20 19:58:40	186.95	197.05	21.76	11.7066		11.7066	-190.571	-200.866
2012-12-20 20:08:40	187.15	197.36	21.75	11.7135		11.7135	-190.775	-201.182
2012-12-20 20:18:40	187.32	197.64	21.73	11.7205		11.7205	-190.948	-201.468
2012-12-20 20:28:40	187.53	197.92	21.72	11.7274	41263.9	11.7274	-191.162	-201.753
2012-12-20 20:38:40	187.69	198.19	21.7	11.7344		11.7344	-191.325	-202.029
2012-12-20 20:48:40	187.92	198.44	21.69	11.7413		11.7413	-191.56	-202.283
2012-12-20 20:58:40	188.09	198.71	21.67	11.7483		11.7483	-191.733	-202.559
2012-12-20 21:08:40	188.24	198.88	21.66	11.7552		11.7552	-191.886	-202.732
2012-12-20 21:18:40	188.41	199.16	21.65	11.7622		11.7622	-192.059	-203.017
2012-12-20 21:28:40	188.64	199.44	21.64	11.7691	41263.9	11.7691	-192.294	-203.303
2012-12-20 21:38:40	188.81	199.67	21.62	11.776		11.776	-192.467	-203.537
2012-12-20 21:48:40	189	199.78	21.61	11.783		11.783	-192.661	-203.649
2012-12-20 21:58:40	189.2	200.18	21.6	11.7899		11.7899	-192.864	-204.057
2012-12-20 22:08:40	189.39	200.46	21.59	11.7969		11.7969	-193.058	-204.343
2012-12-20 22:18:40	189.58	200.74	21.58	11.8038		11.8038	-193.252	-204.628
2012-12-20 22:28:40	189.74	200.93	21.57	11.8108	41263.9	11.8108	-193.415	-204.822
2012-12-20 22:38:40	189.68	201.28	21.56	11.8177		11.8177	-193.354	-205.178
2012-12-20 22:48:40	190.09	201.53	21.55	11.8247		11.8247	-193.772	-205.433
2012-12-20 22:58:40	190.27	201.73	21.54	11.8316		11.8316	-193.955	-205.637
2012-12-20 23:08:40	190.48	202.03	21.54	11.8385		11.8385	-194.169	-205.943
2012-12-20 23:18:40	190.66	202.3	21.53	11.8455		11.8455	-194.353	-206.218
2012-12-20 23:28:40	190.88	202.59	21.52	11.8524	41264	11.8524	-194.577	-206.514
2012-12-20 23:38:40	191.05	202.87	21.51	11.8594		11.8594	-194.75	-206.799
2012-12-20 23:48:40	191.22	203.14	21.5	11.8663		11.8663	-194.924	-207.074
2012-12-20 23:58:40	191.4	203.38	21.49	11.8733		11.8733	-195.107	-207.319
2012-12-21 00:08:40	191.62	203.69	21.49	11.8802		11.8802	-195.331	-207.635
2012-12-21 00:18:40	191.77	203.93	21.48	11.8872		11.8872	-195.484	-207.88
2012-12-21 00:28:40	191.98	204.25	21.47	11.8941	41264	11.8941	-195.698	-208.206
2012-12-21 00:38:40	192.14	204.47	21.47	11.901		11.901	-195.861	-208.43
2012-12-21 00:48:40	192.35	204.76	21.46	11.908		11.908	-196.075	-208.726
2012-12-21 00:58:40	192.52	205.07	21.45	11.9149		11.9149	-196.249	-209.042
2012-12-21 01:08:40	192.63	205.28	21.45	11.9219		11.9219	-196.361	-209.256
2012-12-21 01:18:40	192.9	205.59	21.44	11.9288		11.9288	-196.636	-209.572
2012-12-21 01:28:40	193.06	205.88	21.44	11.9358	41264.1	11.9358	-196.799	-209.867
2012-12-21 01:38:40	193.26	206.04	21.43	11.9427		11.9427	-197.003	-210.031
2012-12-21 01:48:40	193.47	206.45	21.43	11.9497		11.9497	-197.217	-210.449
2012-12-21 01:58:40	193.64	206.75	21.42	11.9566		11.9566	-197.39	-210.754
2012-12-21 02:08:40	193.84	207.03	21.42	11.9635		11.9635	-197.594	-211.04
2012-12-21 02:18:40	194.04	207.31	21.42	11.9705		11.9705	-197.798	-211.325
2012-12-21 02:28:40	194.18	207.59	21.41	11.9774	41264.1	11.9774	-197.941	-211.611
2012-12-21 02:38:40	194.4	207.88	21.41	11.9844		11.9844	-198.165	-211.906
2012-12-21 02:48:40	194.51	208.17	21.4	11.9913		11.9913	-198.277	-212.202
2012-12-21 02:58:40	194.74	208.4	21.4	11.9983		11.9983	-198.512	-212.436
2012-12-21 03:08:40	194.93	208.72	21.4	12.0052		12.0052	-198.705	-212.762
2012-12-21 03:18:40	195.12	208.92	21.4	12.0122		12.0122	-198.899	-212.966
2012-12-21 03:28:40	195.3	209.24	21.39	12.0191	41264.1	12.0191	-199.083	-213.293
2012-12-21 03:38:40	195.51	209.51	21.39	12.026		12.026	-199.297	-213.568
2012-12-21 03:48:40	195.65	209.8	21.39	12.033		12.033	-199.439	-213.863
2012-12-21 03:58:40	195.83	210.11	21.38	12.0399		12.0399	-199.623	-214.179
2012-12-21 04:08:40	196.04	210.34	21.38	12.0469		12.0469	-199.837	-214.414
2012-12-21 04:18:40	196.2	210.63	21.38	12.0538		12.0538	-200	-214.709
2012-12-21 04:28:40	196.45	210.96	21.37	12.0608	41264.2	12.0608	-200.255	-215.046
2012-12-21 04:38:40	196.65	211.21	21.37	12.0677		12.0677	-200.459	-215.301
2012-12-21 04:48:40	196.83	211.53	21.36	12.0747		12.0747	-200.642	-215.627
2012-12-21 04:58:40	197	211.75	21.36	12.0816		12.0816	-200.815	-215.851
2012-12-21 05:08:40	197.22	212.02	21.36	12.0885		12.0885	-201.04	-216.126
2012-12-21 05:18:40	197.33	212.32	21.35	12.0955		12.0955	-201.152	-216.432
2012-12-21 05:28:40	197.55	212.69	21.35	12.1024	41264.2	12.1024	-201.376	-216.809
2012-12-21 05:38:40	197.76	213.02	21.34	12.1094		12.1094	-201.59	-217.146
2012-12-21 05:48:40	197.98	213.32	21.34	12.1163		12.1163	-201.814	-217.452
2012-12-21 05:58:40	198.13	213.65	21.34	12.1233		12.1233	-201.967	-217.788
2012-12-21 06:08:40	198.34	213.82	21.33	12.1302		12.1302	-202.181	-217.961
2012-12-21 06:18:40	198.55	214.21	21.33	12.1372		12.1372	-202.396	-218.359
2012-12-21 06:28:40	198.67	214.5	21.33	12.1441	41264.3	12.1441	-202.518	-218.654
2012-12-21 06:38:40	198.87	214.7	21.32	12.151		12.151	-202.722	-218.858
2012-12-21 06:48:40	199.11	215.01	21.32	12.158		12.158	-202.966	-219.174
2012-12-21 06:58:40	199.33	215.34	21.32	12.1649		12.1649	-203.191	-219.511
2012-12-21 07:08:40	199.52	215.7	21.31	12.1719		12.1719	-203.384	-219.878
2012-12-21 07:18:40	199.7	216.02	21.31	12.1788		12.1788	-203.568	-220.204
2012-12-21 07:28:40	199.85	216.38	21.31	12.1858	41264.3	12.1858	-203.721	-220.571
2012-12-21 07:38:40	200.09	216.66	21.31	12.1927		12.1927	-203.965	-220.856
2012-12-21 07:48:40	200.28	216.9	21.31	12.1997		12.1997	-204.159	-221.101
2012-12-21 07:58:40	200.41	217.2	21.32	12.2066		12.2066	-204.292	-221.407
2012-12-21 08:08:40	200.61	217.4	21.32	12.2135		12.2135	-204.495	-221.611
2012-12-21 08:18:40	192.79	211.76	21.32	12.2205		12.2205	-196.524	-215.861
2012-12-21 08:28:40	201.23	217.41	21.36	12.2274	41264.4	12.2274	-205.127	-221.621
2012-12-21 08:38:40	201.82	217.95	21.4	12.2344		12.2344	-205.729	-222.171
2012-12-21 08:48:40	202.11	218.35	21.43	12.2413		12.2413	-206.024	-222.579
2012-12-21 08:58:40	202.33	218.68	21.45	12.2483		12.2483	-206.249	-222.915
2012-12-21 09:08:40	202.61	219.03	21.47	12.2552		12.2552	-206.534	-223.272
2012-12-21 09:18:40	202.84	219.36	21.48	12.2622		12.2622	-206.769	-223.609
2012-12-21 09:28:40	203.04	219.46	21.49	12.2691	41264.4	12.2691	-206.972	-223.71
2012-12-21 09:38:40	203.2	219.97	21.49	12.276		12.276	-207.136	-224.23
2012-12-21 09:48:40	203.48	220.26	21.5	12.283		12.283	-207.421	-224.526
2012-12-21 09:58:40	203.77	220.31	21.5	12.2899		12.2899	-207.717	-224.577
2012-12-21 10:08:40	203.97	220.81	21.5	12.2969		12.2969	-207.92	-225.087
2012-12-21 10:18:40	204.2	221.21	21.5	12.3038		12.3038	-208.155	-225.494
2012-12-21 10:28:40	204.4	221.48	21.5	12.3108	41264.4	12.3108	-208.359	-225.77
2012-12-21 10:38:40	204.63	221.89	21.5	12.3177		12.3177	-208.593	-226.188
2012-12-21 10:48:40	204.81	222.22	21.5	12.3247		12.3247	-208.777	-226.524
2012-12-21 10:58:40	205.01	222.56	21.5	12.3316		12.3316	-208.981	-226.871
2012-12-21 11:08:40	205.19	222.85	21.5	12.3385		12.3385	-209.164	-227.166
2012-12-21 11:18:40	205.47	223.23	21.5	12.3455		12.3455	-209.45	-227.554
2012-12-21 11:28:40	205.7	223.52	21.49	12.3524	41264.5	12.3524	-209.684	-227.849
2012-12-21 11:38:40	205.9	223.87	21.5	12.3594		12.3594	-209.888	-228.206
2012-12-21 11:48:40	206.11	224.19	21.5	12.3663		12.3663	-210.102	-228.532
2012-12-21 11:58:40	206.3	224.45	21.5	12.3733		12.3733	-210.296	-228.797
2012-12-21 12:08:40	206.41	224.9	21.5	12.3802		12.3802	-210.408	-229.256
2012-12-21 12:18:40	206.73	225.12	21.5	12.3872		12.3872	-210.734	-229.48
2012-12-21 12:28:40	206.94	225.53	21.51	12.3941	41264.5	12.3941	-210.948	-229.898
2012-12-21 12:38:40	207.18	225.89	21.51	12.401		12.401	-211.193	-230.265
2012-12-21 12:48:40	207.39	226.22	21.51	12.408		12.408	-211.407	-230.601
2012-12-21 12:58:40	207.58	226.55	21.51	12.4149		12.4149	-211.6	-230.938
2012-12-21 13:08:40	207.87	226.89	21.52	12.4219		12.4219	-211.896	-231.284
2012-12-21 13:18:40	208.07	227.23	21.52	12.4288		12.4288	-212.1	-231.631
2012-12-21 13:28:40	208.26	227.58	21.52	12.4358	41264.6	12.4358	-212.294	-231.988
2012-12-21 13:38:40	208.46	227.97	21.52	12.4427		12.4427	-212.497	-232.385
2012-12-21 13:48:40	208.73	228.32	21.53	12.4497		12.4497	-212.773	-232.742
2012-12-21 13:58:40	208.89	228.61	21.53	12.4566		12.4566	-212.936	-233.038
2012-12-21 14:08:40	209.19	228.93	21.53	12.4635		12.4635	-213.242	-233.364
2012-12-21 14:18:40	209.41	229.26	21.53	12.4705		12.4705	-213.466	-233.7
2012-12-21 14:28:40	209.64	229.7	21.53	12.4774	41264.6	12.4774	-213.7	-234.149
2012-12-21 14:38:40	209.77	230.01	21.53	12.4844		12.4844	-213.833	-234.465
2012-12-21 14:48:40	210.06	230.46	21.53	12.4913		12.4913	-214.128	-234.924
2012-12-21 14:58:40	210.31	230.82	21.53	12.4983		12.4983	-214.383	-235.291
2012-12-21 15:08:40	210.52	231.2	21.53	12.5052		12.5052	-214.597	-235.678
2012-12-21 15:18:40	210.75	231.55	21.53	12.5122		12.5122	-214.832	-236.035
2012-12-21 15:28:40	210.99	231.99	21.53	12.5191	41264.6	12.5191	-215.076	-236.483
2012-12-21 15:38:40	211.28	232.35	21.53	12.526		12.526	-215.372	-236.85
2012-12-21 15:48:40	211.52	232.68	21.52	12.533		12.533	-215.617	-237.187
2012-12-21 15:58:40	211.78	233.05	21.52	12.5399		12.5399	-215.882	-237.564
2012-12-21 16:08:40	211.96	233.43	21.52	12.5469		12.5469	-216.065	-237.951
2012-12-21 16:18:40	212.23	233.74	21.51	12.5538		12.5538	-216.34	-238.267
2012-12-21 16:28:40	212.51	234.17	21.51	12.5608	41264.7	12.5608	-216.626	-238.705
2012-12-21 16:38:40	212.66	234.53	21.5	12.5677		12.5677	-216.779	-239.072
2012-12-21 16:48:40	212.96	234.94	21.5	12.5747		12.5747	-217.085	-239.49
2012-12-21 16:58:40	213.2	235.37	21.5	12.5816		12.5816	-217.329	-239.929
2012-12-21 17:08:40	213.46	235.75	21.51	12.5885		12.5885	-217.594	-240.316
2012-12-21 17:18:40	213.68	236.15	21.52	12.5955		12.5955	-217.819	-240.724
2012-12-21 17:28:40	213.93	236.63	21.52	12.6024	41264.7	12.6024	-218.073	-241.213
2012-12-21 17:38:40	214.23	237.03	21.52	12.6094		12.6094	-218.379	-241.621
2012-12-21 17:48:40	214.51	237.19	21.52	12.6163		12.6163	-218.665	-241.784
2012-12-21 17:58:40	214.72	237.84	21.51	12.6233		12.6233	-218.879	-242.446
2012-12-21 18:08:40	215.03	238.23	21.51	12.6302		12.6302	-219.195	-242.844
2012-12-21 18:18:40	215.24	238.64	21.5	12.6372		12.6372	-219.409	-243.262
2012-12-21 18:28:40	215.49	239.05	21.5	12.6441	41264.8	12.6441	-219.664	-243.68
2012-12-21 18:38:40	214.3	237.9	21.51	12.651		12.651	-218.451	-242.508
2012-12-21 18:48:40	215.73	239.34	21.55	12.658		12.658	-219.908	-243.976
2012-12-21 18:58:40	216.22	240.03	21.56	12.6649		12.6649	-220.408	-244.679
2012-12-21 19:08:40	216.53	240.54	21.55	12.6719		12.6719	-220.724	-245.199
2012-12-21 19:18:40	216.85	240.77	21.55	12.6788		12.6788	-221.05	-245.433
2012-12-21 19:28:40	217.09	241.43	21.53	12.6858	41264.8	12.6858	-221.295	-246.106
2012-12-21 19:38:40	217.45	241.88	21.52	12.6927		12.6927	-221.662	-246.565
2012-12-21 19:48:40	217.75	242.41	21.51	12.6997		12.6997	-221.967	-247.105
2012-12-21 19:58:40	218.03	242.86	21.5	12.7066		12.7066	-222.253	-247.564
2012-12-21 20:08:40	218.29	243.34	21.49	12.7135		12.7135	-222.518	-248.053
2012-12-21 20:18:40	218.59	243.82	21.49	12.7205		12.7205	-222.824	-248.542
2012-12-21 20:28:40	218.89	244.24	21.48	12.7274	41264.9	12.7274	-223.129	-248.97
2012-12-21 20:38:40	218.83	244.63	21.47	12.7344		12.7344	-223.068	-249.368
2012-12-21 20:48:40	219.31	245.09	21.46	12.7413		12.7413	-223.558	-249.837
2012-12-21 20:58:40	219.61	245.48	21.45	12.7483		12.7483	-223.863	-250.234
2012-12-21 21:08:40	219.81	245.92	21.44	12.7552		12.7552	-224.067	-250.683
[truncated: 1,392 more rows]

## Sheet: Tensi
Zeit [d]	MP bot(2) [cm]	MP top(1) [cm]		air entry bot		AE time	AE [cm]	Type	Pos	Weight
0.00692455	-4.44444	-7.04383		2012-12-29 22:18:40	8800	20.8038	-8970.44	1	2	1
0.0485912	-4.90316	-7.50255
0.0902579	-5.59633	-8.20591		air entry top
0.131925	-6.42202	-9.02141		Time		AE time	AE [cm]	Type	Pos	Weight
0.173591	-7.17635	-9.77574		2012-12-27 00:28:40	8800	17.8941	-8970.44	1	1	1
0.215258	-7.78797	-10.3976
0.256925	-8.20591	-10.8155
0.298591	-8.59327	-11.1927
0.340258	-8.99083	-11.6106
0.381925	-8.98063	-11.5698
0.430536	-9.72477	-12.314
0.472202	-9.92864	-12.4975
0.520813	-10.5403	-13.0989
0.56248	-10.9276	-13.5168
0.604147	-11.0601	-13.578
0.645813	-11.6208	-14.1081
0.68748	-12.0897	-14.6075
0.729147	-12.3853	-14.893
0.770813	-12.7115	-15.2294
0.81248	-13.0785	-15.6065
0.854147	-13.4149	-15.9225
0.895813	-13.792	-16.2895
0.93748	-14.0469	-16.5545
0.979147	-14.4444	-16.9419
1.02081	-14.7197	-17.2375
1.06248	-15.1172	-17.6249
1.10415	-15.3721	-17.8797
1.14581	-15.739	-18.2467
1.18748	-16.0856	-18.5729
1.22915	-16.2589	-18.7462
1.27081	-16.2283	-18.7258
1.31248	-16.7482	-19.2457
1.35415	-16.9419	-19.4088
1.39581	-17.1967	-19.6636
1.42327	-17.4006	-19.8573
1.42744	-17.3802	-19.8471
1.4316	-17.3496	-19.8267
1.43577	-17.3904	-19.8573
1.43994	-17.4414	-19.9083
1.4441	-17.4822	-19.949
1.44827	-17.5025	-19.9898
1.45244	-17.5127	-19.9898
1.4566	-17.5739	-20.0408
1.46077	-17.5841	-20.051
1.47744	-17.6758	-20.1427
1.5191	-17.9205	-20.367
1.56077	-18.002	-20.4995
1.60244	-18.2977	-20.7849
1.6441	-18.1855	-20.7238
1.68577	-18.6442	-21.1825
1.72744	-18.9704	-21.5087
1.7691	-19.1947	-21.7533
1.81077	-19.4597	-22.0285
1.85244	-19.7554	-22.2732
1.8941	-19.9592	-22.4669
1.93577	-20.1529	-22.6606
1.97744	-20.4383	-22.946
2.0191	-20.683	-23.2008
2.06077	-20.8869	-23.3945
2.10244	-21.0703	-23.5882
2.1441	-21.264	-23.7717
2.18577	-21.4883	-24.0061
2.22744	-21.682	-24.1998
2.2691	-21.896	-24.4139
2.31077	-22.0489	-24.5668
2.35244	-22.2222	-24.7401
2.3941	-22.263	-24.7808
2.43577	-22.5688	-25.0968
2.47744	-22.844	-25.3517
2.5191	-23.0683	-25.5963
2.56077	-23.2926	-25.8104
2.60244	-23.0479	-25.5861
2.6441	-23.5066	-26.0347
2.68577	-23.792	-26.3099
2.72744	-23.7819	-26.2793
2.7691	-23.9551	-26.4424
2.81077	-24.21	-26.7074
2.85244	-24.3833	-26.8807
2.8941	-24.5668	-27.0948
2.93577	-24.7604	-27.2681
2.97744	-24.9847	-27.4924
3.0191	-25.1376	-27.6555
3.06077	-25.4434	-27.9511
3.10244	-25.6371	-28.1448
3.1441	-25.739	-28.2467
3.18577	-25.9633	-28.4811
3.22744	-26.0754	-28.5933
3.2691	-25.7288	-28.2773
3.31077	-26.524	-29.0826
3.35244	-26.7482	-29.2762
3.3941	-26.9011	-29.419
3.43577	-27.0846	-29.6228
3.47744	-27.2171	-29.735
3.5191	-27.4516	-29.9592
3.56077	-27.6453	-30.1631
3.60244	-27.8287	-30.3466
3.6441	-28.0122	-30.5301
3.68577	-28.2875	-30.8155
3.72744	-28.5015	-31.0296
3.7691	-28.6952	-31.2232
3.81077	-28.8991	-31.4373
3.85244	-29.0622	-31.6004
3.8941	-29.2966	-31.8349
3.93577	-29.5311	-32.0795
3.97744	-29.7146	-32.2732
4.0191	-29.8777	-32.4363
4.06077	-30.0714	-32.63
4.10244	-30.3262	-32.8746
4.1441	-30.5607	-33.0887
4.18577	-30.7339	-33.2926
4.22744	-30.999	-33.5474
4.2691	-31.2436	-33.792
4.31077	-31.366	-33.9042
4.35244	-31.6208	-34.1488
4.3941	-31.8451	-34.3833
4.43577	-31.896	-34.3935
4.47744	-32.1101	-34.5973
4.5191	-32.1814	-34.6177
4.56077	-32.4975	-34.9337
4.60244	-32.8542	-35.3007
4.6441	-33.211	-35.6881
4.68577	-33.5474	-36.0041
4.72744	-33.9042	-36.3914
4.7691	-34.2406	-36.738
4.81077	-34.4546	-37.0234
4.85244	-34.9337	-37.5127
4.8941	-35.2905	-37.8593
4.93577	-35.6371	-38.2059
4.97744	-35.9633	-38.5423
5.0191	-36.1264	-38.6544
5.06077	-36.4424	-38.9806
5.10244	-36.8298	-39.3476
5.1441	-37.1152	-39.6432
5.18577	-37.4516	-39.9796
5.22744	-37.6758	-40.1835
5.2691	-37.7676	-40.3466
5.31077	-38.369	-40.9174
5.35244	-38.6646	-41.2232
5.3941	-38.9704	-41.5087
5.43577	-39.2661	-41.7839
5.47744	-39.5413	-42.0795
5.5191	-39.8777	-42.4057
5.56077	-40.2243	-42.7829
5.60244	-40.6422	-43.1702
5.6441	-41.0296	-43.5474
5.68577	-41.2232	-43.7513
5.72744	-41.6208	-44.0877
5.7691	-42.1203	-44.6075
5.81077	-42.3649	-44.8114
5.85244	-42.8033	-45.2497
5.8941	-43.2824	-45.739
5.93577	-43.7003	-46.1774
5.97744	-44.1488	-46.6157
6.0191	-44.5973	-47.0744
6.06077	-44.9847	-47.4516
6.10244	-45.4128	-47.8695
6.1441	-45.8614	-48.3282
6.18577	-46.208	-48.736
6.22744	-46.6769	-49.1233
6.2691	-47.0438	-49.4801
6.31077	-47.4822	-49.9083
6.35244	-47.8389	-50.2752
6.3941	-48.3384	-50.8563
6.43577	-48.7971	-51.3048
6.47744	-49.2355	-51.7431
6.5191	-49.6432	-52.2018
6.56077	-50.1733	-52.6809
6.60244	-50.6422	-53.1498
6.6441	-51.1417	-53.6493
6.68577	-51.6616	-54.1896
6.72744	-52.2222	-54.7401
6.7691	-52.7829	-55.3007
6.81077	-53.3333	-55.8614
6.85244	-53.9246	-56.4322
6.8941	-54.4546	-56.9827
6.93577	-55.0357	-57.5841
6.97744	-55.6269	-58.1753
7.0191	-56.2283	-58.7666
7.06077	-56.8807	-59.4292
7.10244	-57.4618	-60.0306
7.1441	-58.0836	-60.6626
7.18577	-58.7971	-61.3456
7.22744	-59.3884	-61.947
7.2691	-60.0815	-62.6198
7.31077	-60.6932	-63.2518
7.35244	-61.3558	-63.9042
7.3941	-62.0285	-64.577
7.43577	-62.6911	-65.2497
7.47744	-63.3945	-65.9735
7.5191	-63.9144	-66.4526
7.56077	-64.7808	-67.3191
7.60244	-65.6065	-68.1346
7.6441	-66.4628	-69.001
7.68577	-67.3293	-69.8675
7.72744	-68.2263	-70.7543
7.7691	-69.1539	-71.6922
7.81077	-70.0815	-72.6198
7.85244	-70.999	-73.5678
7.8941	-71.9368	-74.4954
7.93577	-72.844	-75.4128
7.97744	-73.8022	-76.4016
8.0191	-74.7197	-77.3293
8.06077	-75.6983	-78.2875
8.10244	-76.6157	-79.2049
8.1441	-77.5331	-80.1121
8.18577	-78.4404	-81.1621
8.22744	-79.6126	-82.212
8.2691	-80.5607	-83.16
8.31077	-81.5189	-84.1386
8.35244	-82.5484	-85.0765
8.3941	-83.4455	-85.9735
8.43577	-84.5973	-87.156
8.47744	-85.739	-88.2875
8.5191	-86.7584	-89.3476
8.56077	-87.9409	-90.5097
8.60244	-89.1335	-91.7431
8.6441	-90.2854	-92.8848
8.68577	-91.4883	-94.1284
8.72744	-92.7727	-95.4332
8.7691	-94.0265	-96.7074
8.81077	-95.3007	-98.002
8.85244	-96.5749	-99.2966
8.8941	-97.8287	-100.54
8.93577	-99.1335	-101.876
8.97744	-100.489	-103.242
9.0191	-101.845	-104.618
9.06077	-103.18	-105.943
9.10244	-104.506	-107.319
9.1441	-105.892	-108.705
9.18577	-107.288	-110.133
9.22744	-107.92	-111.091
9.2691	-109.98	-112.793
9.31077	-111.295	-114.108
9.35244	-112.65	-115.474
9.3941	-114.057	-116.901
9.43577	-115.505	-118.369
9.47744	-116.972	-119.817
9.5191	-118.41	-121.346
9.56077	-119.969	-122.915
9.60244	-121.549	-124.22
9.6441	-123.028	-125.688
9.68577	-124.597	-127.299
9.72744	-126.116	-128.797
9.7691	-127.666	-130.418
9.81077	-129.235	-131.978
9.85244	-130.826	-133.639
9.8941	-132.406	-135.27
9.93577	-134.016	-136.922
9.97744	-135.637	-138.573
10.0191	-137.238	-140.173
10.0608	-138.858	-141.784
10.1024	-140.418	-143.466
10.1441	-142.069	-145.107
10.1858	-143.639	-146.84
10.2274	-145.219	-148.43
10.2691	-146.677	-150.031
10.3108	-148.226	-151.641
10.3524	-149.766	-153.201
10.3941	-151.325	-154.811
10.4358	-152.803	-156.361
10.4774	-154.292	-157.931
10.5191	-155.719	-159.45
10.5608	-157.095	-160.907
10.6024	-158.512	-162.161
10.6441	-159.898	-163.588
10.6858	-161.254	-165.066
10.7274	-162.63	-166.544
10.7691	-164.037	-168.043
10.8108	-165.392	-169.48
10.8524	-166.656	-170.826
10.8941	-167.798	-172.13
10.9358	-169.042	-173.527
10.9774	-170.234	-174.913
11.0191	-171.427	-176.239
11.0608	-172.62	-177.594
11.1024	-173.772	-178.94
11.1441	-174.924	-180.275
11.1858	-176.055	-181.682
11.2274	-175.923	-182.589
11.2691	-178.135	-184.373
11.3108	-179.368	-185.78
11.3524	-180.153	-186.86
11.3941	-180.948	-187.982
11.4358	-182.518	-189.918
11.4774	-183.884	-191.774
11.5191	-185.178	-193.476
11.5608	-186.351	-195.27
11.6024	-186.34	-196.096
11.6441	-188.777	-198.502
11.6858	-189.959	-200.082
11.7274	-191.162	-201.753
11.7691	-192.294	-203.303
11.8108	-193.415	-204.822
11.8524	-194.577	-206.514
11.8941	-195.698	-208.206
11.9358	-196.799	-209.867
11.9774	-197.941	-211.611
12.0191	-199.083	-213.293
12.0608	-200.255	-215.046
12.1024	-201.376	-216.809
12.1441	-202.518	-218.654
12.1858	-203.721	-220.571
12.2274	-205.127	-221.621
12.2691	-206.972	-223.71
12.3108	-208.359	-225.77
12.3524	-209.684	-227.849
12.3941	-210.948	-229.898
12.4358	-212.294	-231.988
12.4774	-213.7	-234.149
12.5191	-215.076	-236.483
12.5608	-216.626	-238.705
12.6024	-218.073	-241.213
12.6441	-219.664	-243.68
12.6858	-221.295	-246.106
12.7274	-223.129	-248.97
12.7691	-224.771	-251.498
12.8108	-226.402	-254.343
12.8524	-228.196	-257.115
12.8941	-229.918	-260.163
12.9358	-231.662	-263.242
12.9774	-233.527	-266.473
13.0191	-235.403	-269.643
13.0608	-237.258	-273.282
13.1024	-239.307	-276.891
13.1441	-241.366	-280.765
13.1858	-243.242	-284.343
13.2274	-245.525	-288.777
13.2691	-247.829	-293.15
13.3108	-250.112	-297.105
13.3524	-252.406	-302.008
13.3941	-254.822	-306.758
13.4358	-257.146	-311.611
13.4774	-259.827	-316.83
13.5191	-262.446	-321.774
13.5608	-265.127	-327.074
13.6024	-268.094	-332.762
13.6441	-271.203	-338.767
13.6858	-271.611	-340.163
13.7274	-278.573	-351.254
13.7691	-282.202	-359.185
13.8108	-285.912	-366.911
13.8524	-289.725	-374.292
13.8941	-293.588	-381.651
13.9358	-297.594	-390.245
13.9774	-301.692	-398.461
14.0191	-306.045	-406.697
14.0608	-310.642	-415.515
14.1024	-315.199	-424.822
14.1441	-319.49	-434.444
14.1858	-324.913	-444.781
14.2274	-329.796	-452.334
14.2691	-336.534	-458.135
14.3108	-344.975	-472.895
14.3524	-351.896	-485.545
14.3941	-358.328	-497.268
14.4358	-364.903	-508.909
14.4774	-371.213	-520.968
14.5191	-377.625	-534.322
14.5608	-385.556	-547.971
14.6024	-393.109	-560.683
14.6441	-399.674	-574.75
14.6858	-408.022	-590.194
14.7274	-416.565	-604.271
14.7691	-424.985	-619.653
14.8108	-433.986	-635.087
14.8524	-443.802	-651.305
14.8941	-453.415	-667.92
14.9358	-464.434	-687.146
14.9774	-475.403	-704.699
15.0191	-486.616	-724.526
15.0608	-497.737	-745.076
15.1024	-509.623	-766.789
15.1441	-520.948	-788.644
15.1788	-531.784	-806.85
15.2274	-547.564
15.2691	-561.162

## Sheet: HYDRUS
Data für die Zielfunktion: 2 x Tensionen, 1 x Endwassergehalt						Verdunstungsrate
Time	Obs	Type	Pos	Weight		Zeitintervall		Evarate [cm/d]	hCritA [cm]		Type	1-Tension	2-Wassergehalt
0.00692455	-4.44444	1	2	1		0.372626	0	0.427302	100000		Pos	1-top	2-bot	(von oben nach unten)
0.0485912	-4.90316	1	2	1		0.743179	0	0.427302	100000		35	Time-Variable boundary conditions
0.0902579	-5.59633	1	2	1		1.07154	0	0.373049	100000		22.764	Final Time	Time Information
0.131925	-6.42202	1	2	1		1.63889	0	0.321205	100000		787	Inverse Data Points
0.173591	-7.17635	1	2	1		1.9841	0	0.297927	100000		56.7822	BC-top	[hPa]
0.215258	-7.78797	1	2	1		2.21333	0	0.282493	100000		58.0322	tens_top_ini	[hPa]	1
0.256925	-8.20591	1	2	1		2.74394	0	0.29093	100000		121.309	tens_bot_ini	[hPa]	2
0.298591	-8.59327	1	2	1		2.97648	0	0.324158	100000		122.559	BC-bot	[hPa]
0.340258	-8.99083	1	2	1		3.63904	0	0.341621	100000
0.381925	-8.98063	1	2	1		3.97561	0	0.331183	100000		-8.15112
0.430536	-9.72477	1	2	1		4.66172	0	0.313238	100000		-6.90112
0.472202	-9.92864	1	2	1		5.16395	0	0.335317	100000		-4.28135
0.520813	-10.5403	1	2	1		5.63797	0	0.332427	100000		-3.03135
0.56248	-10.9276	1	2	1		6.08251	0	0.30487	100000
0.604147	-11.0601	1	2	1		6.73725	0	0.293338	100000
0.645813	-11.6208	1	2	1		7.85796	0	0.257599	100000
0.68748	-12.0897	1	2	1		8.62464	0	0.256522	100000
0.729147	-12.3853	1	2	1		9.59976	0	0.243838	100000
0.770813	-12.7115	1	2	1		9.9339	0	0.223799	100000
0.81248	-13.0785	1	2	1		10.5874	0	0.221181	100000
0.854147	-13.4149	1	2	1		10.9437	0	0.226757	100000
0.895813	-13.792	1	2	1		11.5984	0	0.217124	100000
0.93748	-14.0469	1	2	1		11.9726	0	0.249656	100000
0.979147	-14.4444	1	2	1		12.592	0	0.242763	100000
1.02081	-14.7197	1	2	1		13.0174	0	0.251667	100000
1.06248	-15.1172	1	2	1		13.6561	0	0.243249	100000
1.10415	-15.3721	1	2	1		14.0512	0	0.219713	100000
1.14581	-15.739	1	2	1		14.614	0	0.199476	100000
1.18748	-16.0856	1	2	1		16.7386	0	0.141069	100000
1.22915	-16.2589	1	2	1		17.8593	0	0.0928426	100000
1.27081	-16.2283	1	2	1		18.7494	0	0.0732067	100000
1.31248	-16.7482	1	2	1		19.0057	0	0.0649064	100000
1.35415	-16.9419	1	2	1		19.6521	0	0.0620326	100000
1.39581	-17.1967	1	2	1		20.6505	0	0.053214	100000
1.42327	-17.4006	1	2	1		22.764	0	0.0388189	100000
1.42744	-17.3802	1	2	1
1.4316	-17.3496	1	2	1
1.43577	-17.3904	1	2	1
1.43994	-17.4414	1	2	1
1.4441	-17.4822	1	2	1
1.44827	-17.5025	1	2	1
1.45244	-17.5127	1	2	1
1.4566	-17.5739	1	2	1
1.46077	-17.5841	1	2	1
1.47744	-17.6758	1	2	1
1.5191	-17.9205	1	2	1
1.56077	-18.002	1	2	1
1.60244	-18.2977	1	2	1
1.6441	-18.1855	1	2	1
1.68577	-18.6442	1	2	1
1.72744	-18.9704	1	2	1
1.7691	-19.1947	1	2	1
1.81077	-19.4597	1	2	1
1.85244	-19.7554	1	2	1
1.8941	-19.9592	1	2	1
1.93577	-20.1529	1	2	1
1.97744	-20.4383	1	2	1
2.0191	-20.683	1	2	1
2.06077	-20.8869	1	2	1
2.10244	-21.0703	1	2	1
2.1441	-21.264	1	2	1
2.18577	-21.4883	1	2	1
2.22744	-21.682	1	2	1
2.2691	-21.896	1	2	1
2.31077	-22.0489	1	2	1
2.35244	-22.2222	1	2	1
2.3941	-22.263	1	2	1
2.43577	-22.5688	1	2	1
2.47744	-22.844	1	2	1
2.5191	-23.0683	1	2	1
2.56077	-23.2926	1	2	1
2.60244	-23.0479	1	2	1
2.6441	-23.5066	1	2	1
2.68577	-23.792	1	2	1
2.72744	-23.7819	1	2	1
2.7691	-23.9551	1	2	1
2.81077	-24.21	1	2	1
2.85244	-24.3833	1	2	1
2.8941	-24.5668	1	2	1
2.93577	-24.7604	1	2	1
2.97744	-24.9847	1	2	1
3.0191	-25.1376	1	2	1
3.06077	-25.4434	1	2	1
3.10244	-25.6371	1	2	1
3.1441	-25.739	1	2	1
3.18577	-25.9633	1	2	1
3.22744	-26.0754	1	2	1
3.2691	-25.7288	1	2	1
3.31077	-26.524	1	2	1
3.35244	-26.7482	1	2	1
3.3941	-26.9011	1	2	1
3.43577	-27.0846	1	2	1
3.47744	-27.2171	1	2	1
3.5191	-27.4516	1	2	1
3.56077	-27.6453	1	2	1
3.60244	-27.8287	1	2	1
3.6441	-28.0122	1	2	1
3.68577	-28.2875	1	2	1
3.72744	-28.5015	1	2	1
3.7691	-28.6952	1	2	1
3.81077	-28.8991	1	2	1
3.85244	-29.0622	1	2	1
3.8941	-29.2966	1	2	1
3.93577	-29.5311	1	2	1
3.97744	-29.7146	1	2	1
4.0191	-29.8777	1	2	1
4.06077	-30.0714	1	2	1
4.10244	-30.3262	1	2	1
4.1441	-30.5607	1	2	1
4.18577	-30.7339	1	2	1
4.22744	-30.999	1	2	1
4.2691	-31.2436	1	2	1
4.31077	-31.366	1	2	1
4.35244	-31.6208	1	2	1
4.3941	-31.8451	1	2	1
4.43577	-31.896	1	2	1
4.47744	-32.1101	1	2	1
4.5191	-32.1814	1	2	1
4.56077	-32.4975	1	2	1
4.60244	-32.8542	1	2	1
4.6441	-33.211	1	2	1
4.68577	-33.5474	1	2	1
4.72744	-33.9042	1	2	1
4.7691	-34.2406	1	2	1
4.81077	-34.4546	1	2	1
4.85244	-34.9337	1	2	1
4.8941	-35.2905	1	2	1
4.93577	-35.6371	1	2	1
4.97744	-35.9633	1	2	1
5.0191	-36.1264	1	2	1
5.06077	-36.4424	1	2	1
5.10244	-36.8298	1	2	1
5.1441	-37.1152	1	2	1
5.18577	-37.4516	1	2	1
5.22744	-37.6758	1	2	1
5.2691	-37.7676	1	2	1
5.31077	-38.369	1	2	1
5.35244	-38.6646	1	2	1
5.3941	-38.9704	1	2	1
5.43577	-39.2661	1	2	1
5.47744	-39.5413	1	2	1
5.5191	-39.8777	1	2	1
5.56077	-40.2243	1	2	1
5.60244	-40.6422	1	2	1
5.6441	-41.0296	1	2	1
5.68577	-41.2232	1	2	1
5.72744	-41.6208	1	2	1
5.7691	-42.1203	1	2	1
5.81077	-42.3649	1	2	1
5.85244	-42.8033	1	2	1
5.8941	-43.2824	1	2	1
5.93577	-43.7003	1	2	1
5.97744	-44.1488	1	2	1
6.0191	-44.5973	1	2	1
6.06077	-44.9847	1	2	1
6.10244	-45.4128	1	2	1
6.1441	-45.8614	1	2	1
6.18577	-46.208	1	2	1
6.22744	-46.6769	1	2	1
6.2691	-47.0438	1	2	1
6.31077	-47.4822	1	2	1
6.35244	-47.8389	1	2	1
6.3941	-48.3384	1	2	1
6.43577	-48.7971	1	2	1
6.47744	-49.2355	1	2	1
6.5191	-49.6432	1	2	1
6.56077	-50.1733	1	2	1
6.60244	-50.6422	1	2	1
6.6441	-51.1417	1	2	1
6.68577	-51.6616	1	2	1
6.72744	-52.2222	1	2	1
6.7691	-52.7829	1	2	1
6.81077	-53.3333	1	2	1
6.85244	-53.9246	1	2	1
6.8941	-54.4546	1	2	1
6.93577	-55.0357	1	2	1
6.97744	-55.6269	1	2	1
7.0191	-56.2283	1	2	1
7.06077	-56.8807	1	2	1
7.10244	-57.4618	1	2	1
7.1441	-58.0836	1	2	1
7.18577	-58.7971	1	2	1
7.22744	-59.3884	1	2	1
7.2691	-60.0815	1	2	1
7.31077	-60.6932	1	2	1
7.35244	-61.3558	1	2	1
7.3941	-62.0285	1	2	1
7.43577	-62.6911	1	2	1
7.47744	-63.3945	1	2	1
7.5191	-63.9144	1	2	1
7.56077	-64.7808	1	2	1
7.60244	-65.6065	1	2	1
7.6441	-66.4628	1	2	1
7.68577	-67.3293	1	2	1
7.72744	-68.2263	1	2	1
7.7691	-69.1539	1	2	1
7.81077	-70.0815	1	2	1
7.85244	-70.999	1	2	1
7.8941	-71.9368	1	2	1
7.93577	-72.844	1	2	1
7.97744	-73.8022	1	2	1
8.0191	-74.7197	1	2	1
8.06077	-75.6983	1	2	1
8.10244	-76.6157	1	2	1
8.1441	-77.5331	1	2	1
8.18577	-78.4404	1	2	1
8.22744	-79.6126	1	2	1
8.2691	-80.5607	1	2	1
8.31077	-81.5189	1	2	1
8.35244	-82.5484	1	2	1
8.3941	-83.4455	1	2	1
8.43577	-84.5973	1	2	1
8.47744	-85.739	1	2	1
8.5191	-86.7584	1	2	1
8.56077	-87.9409	1	2	1
8.60244	-89.1335	1	2	1
8.6441	-90.2854	1	2	1
8.68577	-91.4883	1	2	1
8.72744	-92.7727	1	2	1
8.7691	-94.0265	1	2	1
8.81077	-95.3007	1	2	1
8.85244	-96.5749	1	2	1
8.8941	-97.8287	1	2	1
8.93577	-99.1335	1	2	1
8.97744	-100.489	1	2	1
9.0191	-101.845	1	2	1
9.06077	-103.18	1	2	1
9.10244	-104.506	1	2	1
9.1441	-105.892	1	2	1
9.18577	-107.288	1	2	1
9.22744	-107.92	1	2	1
9.2691	-109.98	1	2	1
9.31077	-111.295	1	2	1
9.35244	-112.65	1	2	1
9.3941	-114.057	1	2	1
9.43577	-115.505	1	2	1
9.47744	-116.972	1	2	1
9.5191	-118.41	1	2	1
9.56077	-119.969	1	2	1
9.60244	-121.549	1	2	1
9.6441	-123.028	1	2	1
9.68577	-124.597	1	2	1
9.72744	-126.116	1	2	1
9.7691	-127.666	1	2	1
9.81077	-129.235	1	2	1
9.85244	-130.826	1	2	1
9.8941	-132.406	1	2	1
9.93577	-134.016	1	2	1
9.97744	-135.637	1	2	1
10.0191	-137.238	1	2	1
10.0608	-138.858	1	2	1
10.1024	-140.418	1	2	1
10.1441	-142.069	1	2	1
10.1858	-143.639	1	2	1
10.2274	-145.219	1	2	1
10.2691	-146.677	1	2	1
10.3108	-148.226	1	2	1
10.3524	-149.766	1	2	1
10.3941	-151.325	1	2	1
10.4358	-152.803	1	2	1
10.4774	-154.292	1	2	1
10.5191	-155.719	1	2	1
10.5608	-157.095	1	2	1
10.6024	-158.512	1	2	1
10.6441	-159.898	1	2	1
10.6858	-161.254	1	2	1
10.7274	-162.63	1	2	1
10.7691	-164.037	1	2	1
10.8108	-165.392	1	2	1
10.8524	-166.656	1	2	1
10.8941	-167.798	1	2	1
10.9358	-169.042	1	2	1
10.9774	-170.234	1	2	1
11.0191	-171.427	1	2	1
11.0608	-172.62	1	2	1
11.1024	-173.772	1	2	1
11.1441	-174.924	1	2	1
11.1858	-176.055	1	2	1
11.2274	-175.923	1	2	1
11.2691	-178.135	1	2	1
11.3108	-179.368	1	2	1
11.3524	-180.153	1	2	1
11.3941	-180.948	1	2	1
11.4358	-182.518	1	2	1
11.4774	-183.884	1	2	1
11.5191	-185.178	1	2	1
11.5608	-186.351	1	2	1
11.6024	-186.34	1	2	1
11.6441	-188.777	1	2	1
11.6858	-189.959	1	2	1
11.7274	-191.162	1	2	1
11.7691	-192.294	1	2	1
11.8108	-193.415	1	2	1
11.8524	-194.577	1	2	1
11.8941	-195.698	1	2	1
11.9358	-196.799	1	2	1
11.9774	-197.941	1	2	1
12.0191	-199.083	1	2	1
12.0608	-200.255	1	2	1
12.1024	-201.376	1	2	1
12.1441	-202.518	1	2	1
12.1858	-203.721	1	2	1
12.2274	-205.127	1	2	1
12.2691	-206.972	1	2	1
12.3108	-208.359	1	2	1
12.3524	-209.684	1	2	1
12.3941	-210.948	1	2	1
12.4358	-212.294	1	2	1
12.4774	-213.7	1	2	1
12.5191	-215.076	1	2	1
12.5608	-216.626	1	2	1
12.6024	-218.073	1	2	1
12.6441	-219.664	1	2	1
12.6858	-221.295	1	2	1
12.7274	-223.129	1	2	1
12.7691	-224.771	1	2	1
12.8108	-226.402	1	2	1
12.8524	-228.196	1	2	1
12.8941	-229.918	1	2	1
12.9358	-231.662	1	2	1
12.9774	-233.527	1	2	1
13.0191	-235.403	1	2	1
13.0608	-237.258	1	2	1
13.1024	-239.307	1	2	1
13.1441	-241.366	1	2	1
13.1858	-243.242	1	2	1
13.2274	-245.525	1	2	1
13.2691	-247.829	1	2	1
13.3108	-250.112	1	2	1
13.3524	-252.406	1	2	1
13.3941	-254.822	1	2	1
13.4358	-257.146	1	2	1
13.4774	-259.827	1	2	1
13.5191	-262.446	1	2	1
13.5608	-265.127	1	2	1
13.6024	-268.094	1	2	1
13.6441	-271.203	1	2	1
13.6858	-271.611	1	2	1
13.7274	-278.573	1	2	1
13.7691	-282.202	1	2	1
13.8108	-285.912	1	2	1
13.8524	-289.725	1	2	1
13.8941	-293.588	1	2	1
13.9358	-297.594	1	2	1
13.9774	-301.692	1	2	1
14.0191	-306.045	1	2	1
14.0608	-310.642	1	2	1
14.1024	-315.199	1	2	1
14.1441	-319.49	1	2	1
14.1858	-324.913	1	2	1
14.2274	-329.796	1	2	1
14.2691	-336.534	1	2	1
14.3108	-344.975	1	2	1
14.3524	-351.896	1	2	1
14.3941	-358.328	1	2	1
14.4358	-364.903	1	2	1
14.4774	-371.213	1	2	1
14.5191	-377.625	1	2	1
14.5608	-385.556	1	2	1
14.6024	-393.109	1	2	1
14.6441	-399.674	1	2	1
14.6858	-408.022	1	2	1
14.7274	-416.565	1	2	1
14.7691	-424.985	1	2	1
14.8108	-433.986	1	2	1
14.8524	-443.802	1	2	1
14.8941	-453.415	1	2	1
14.9358	-464.434	1	2	1
14.9774	-475.403	1	2	1
15.0191	-486.616	1	2	1
15.0608	-497.737	1	2	1
15.1024	-509.623	1	2	1
15.1441	-520.948	1	2	1
15.1788	-531.784	1	2	1
15.2274	-547.564	1	2	1
15.2691	-561.162	1	2	1
20.8038	-8970.44	1	2	1
0.00692455	-7.04383	1	1	1
0.0485912	-7.50255	1	1	1
0.0902579	-8.20591	1	1	1
0.131925	-9.02141	1	1	1
0.173591	-9.77574	1	1	1
0.215258	-10.3976	1	1	1
0.256925	-10.8155	1	1	1
0.298591	-11.1927	1	1	1
0.340258	-11.6106	1	1	1
0.381925	-11.5698	1	1	1
0.430536	-12.314	1	1	1
0.472202	-12.4975	1	1	1
0.520813	-13.0989	1	1	1
0.56248	-13.5168	1	1	1
0.604147	-13.578	1	1	1
0.645813	-14.1081	1	1	1
0.68748	-14.6075	1	1	1
0.729147	-14.893	1	1	1
0.770813	-15.2294	1	1	1
0.81248	-15.6065	1	1	1
0.854147	-15.9225	1	1	1
0.895813	-16.2895	1	1	1
0.93748	-16.5545	1	1	1
0.979147	-16.9419	1	1	1
1.02081	-17.2375	1	1	1
1.06248	-17.6249	1	1	1
1.10415	-17.8797	1	1	1
1.14581	-18.2467	1	1	1
1.18748	-18.5729	1	1	1
1.22915	-18.7462	1	1	1
1.27081	-18.7258	1	1	1
1.31248	-19.2457	1	1	1
1.35415	-19.4088	1	1	1
1.39581	-19.6636	1	1	1
1.42327	-19.8573	1	1	1
1.42744	-19.8471	1	1	1
1.4316	-19.8267	1	1	1
1.43577	-19.8573	1	1	1
1.43994	-19.9083	1	1	1
1.4441	-19.949	1	1	1
1.44827	-19.9898	1	1	1
1.45244	-19.9898	1	1	1
1.4566	-20.0408	1	1	1
1.46077	-20.051	1	1	1
1.47744	-20.1427	1	1	1
1.5191	-20.367	1	1	1
1.56077	-20.4995	1	1	1
1.60244	-20.7849	1	1	1
1.6441	-20.7238	1	1	1
1.68577	-21.1825	1	1	1
1.72744	-21.5087	1	1	1
1.7691	-21.7533	1	1	1
1.81077	-22.0285	1	1	1
1.85244	-22.2732	1	1	1
1.8941	-22.4669	1	1	1
1.93577	-22.6606	1	1	1
1.97744	-22.946	1	1	1
2.0191	-23.2008	1	1	1
2.06077	-23.3945	1	1	1
2.10244	-23.5882	1	1	1
2.1441	-23.7717	1	1	1
2.18577	-24.0061	1	1	1
2.22744	-24.1998	1	1	1
2.2691	-24.4139	1	1	1
2.31077	-24.5668	1	1	1
2.35244	-24.7401	1	1	1
2.3941	-24.7808	1	1	1
2.43577	-25.0968	1	1	1
2.47744	-25.3517	1	1	1
2.5191	-25.5963	1	1	1
2.56077	-25.8104	1	1	1
2.60244	-25.5861	1	1	1
2.6441	-26.0347	1	1	1
2.68577	-26.3099	1	1	1
2.72744	-26.2793	1	1	1
2.7691	-26.4424	1	1	1
2.81077	-26.7074	1	1	1
2.85244	-26.8807	1	1	1
2.8941	-27.0948	1	1	1
2.93577	-27.2681	1	1	1
2.97744	-27.4924	1	1	1
3.0191	-27.6555	1	1	1
3.06077	-27.9511	1	1	1
3.10244	-28.1448	1	1	1
3.1441	-28.2467	1	1	1
3.18577	-28.4811	1	1	1
3.22744	-28.5933	1	1	1
3.2691	-28.2773	1	1	1
3.31077	-29.0826	1	1	1
3.35244	-29.2762	1	1	1
3.3941	-29.419	1	1	1
3.43577	-29.6228	1	1	1
3.47744	-29.735	1	1	1
3.5191	-29.9592	1	1	1
3.56077	-30.1631	1	1	1
3.60244	-30.3466	1	1	1
3.6441	-30.5301	1	1	1
3.68577	-30.8155	1	1	1
3.72744	-31.0296	1	1	1
3.7691	-31.2232	1	1	1
3.81077	-31.4373	1	1	1
3.85244	-31.6004	1	1	1
3.8941	-31.8349	1	1	1
3.93577	-32.0795	1	1	1
3.97744	-32.2732	1	1	1
4.0191	-32.4363	1	1	1
4.06077	-32.63	1	1	1
4.10244	-32.8746	1	1	1
4.1441	-33.0887	1	1	1
4.18577	-33.2926	1	1	1
4.22744	-33.5474	1	1	1
4.2691	-33.792	1	1	1
4.31077	-33.9042	1	1	1
4.35244	-34.1488	1	1	1
4.3941	-34.3833	1	1	1
4.43577	-34.3935	1	1	1
4.47744	-34.5973	1	1	1
4.5191	-34.6177	1	1	1
4.56077	-34.9337	1	1	1
4.60244	-35.3007	1	1	1
4.6441	-35.6881	1	1	1
4.68577	-36.0041	1	1	1
4.72744	-36.3914	1	1	1
4.7691	-36.738	1	1	1
4.81077	-37.0234	1	1	1
4.85244	-37.5127	1	1	1
4.8941	-37.8593	1	1	1
4.93577	-38.2059	1	1	1
4.97744	-38.5423	1	1	1
5.0191	-38.6544	1	1	1
5.06077	-38.9806	1	1	1
5.10244	-39.3476	1	1	1
5.1441	-39.6432	1	1	1
5.18577	-39.9796	1	1	1
5.22744	-40.1835	1	1	1
5.2691	-40.3466	1	1	1
5.31077	-40.9174	1	1	1
5.35244	-41.2232	1	1	1
5.3941	-41.5087	1	1	1
5.43577	-41.7839	1	1	1
5.47744	-42.0795	1	1	1
5.5191	-42.4057	1	1	1
5.56077	-42.7829	1	1	1
5.60244	-43.1702	1	1	1
5.6441	-43.5474	1	1	1
5.68577	-43.7513	1	1	1
5.72744	-44.0877	1	1	1
5.7691	-44.6075	1	1	1
5.81077	-44.8114	1	1	1
5.85244	-45.2497	1	1	1
5.8941	-45.739	1	1	1
5.93577	-46.1774	1	1	1
5.97744	-46.6157	1	1	1
6.0191	-47.0744	1	1	1
6.06077	-47.4516	1	1	1
6.10244	-47.8695	1	1	1
6.1441	-48.3282	1	1	1
6.18577	-48.736	1	1	1
6.22744	-49.1233	1	1	1
6.2691	-49.4801	1	1	1
6.31077	-49.9083	1	1	1
6.35244	-50.2752	1	1	1
6.3941	-50.8563	1	1	1
6.43577	-51.3048	1	1	1
6.47744	-51.7431	1	1	1
6.5191	-52.2018	1	1	1
6.56077	-52.6809	1	1	1
6.60244	-53.1498	1	1	1
6.6441	-53.6493	1	1	1
6.68577	-54.1896	1	1	1
6.72744	-54.7401	1	1	1
6.7691	-55.3007	1	1	1
6.81077	-55.8614	1	1	1
6.85244	-56.4322	1	1	1
6.8941	-56.9827	1	1	1
6.93577	-57.5841	1	1	1
6.97744	-58.1753	1	1	1
7.0191	-58.7666	1	1	1
7.06077	-59.4292	1	1	1
7.10244	-60.0306	1	1	1
7.1441	-60.6626	1	1	1
7.18577	-61.3456	1	1	1
7.22744	-61.947	1	1	1
7.2691	-62.6198	1	1	1
7.31077	-63.2518	1	1	1
7.35244	-63.9042	1	1	1
7.3941	-64.577	1	1	1
7.43577	-65.2497	1	1	1
7.47744	-65.9735	1	1	1
7.5191	-66.4526	1	1	1
7.56077	-67.3191	1	1	1
7.60244	-68.1346	1	1	1
7.6441	-69.001	1	1	1
7.68577	-69.8675	1	1	1
7.72744	-70.7543	1	1	1
7.7691	-71.6922	1	1	1
7.81077	-72.6198	1	1	1
7.85244	-73.5678	1	1	1
7.8941	-74.4954	1	1	1
7.93577	-75.4128	1	1	1
7.97744	-76.4016	1	1	1
8.0191	-77.3293	1	1	1
8.06077	-78.2875	1	1	1
8.10244	-79.2049	1	1	1
8.1441	-80.1121	1	1	1
8.18577	-81.1621	1	1	1
8.22744	-82.212	1	1	1
8.2691	-83.16	1	1	1
8.31077	-84.1386	1	1	1
8.35244	-85.0765	1	1	1
8.3941	-85.9735	1	1	1
8.43577	-87.156	1	1	1
8.47744	-88.2875	1	1	1
8.5191	-89.3476	1	1	1
8.56077	-90.5097	1	1	1
8.60244	-91.7431	1	1	1
8.6441	-92.8848	1	1	1
8.68577	-94.1284	1	1	1
8.72744	-95.4332	1	1	1
8.7691	-96.7074	1	1	1
8.81077	-98.002	1	1	1
8.85244	-99.2966	1	1	1
8.8941	-100.54	1	1	1
8.93577	-101.876	1	1	1
8.97744	-103.242	1	1	1
9.0191	-104.618	1	1	1
9.06077	-105.943	1	1	1
9.10244	-107.319	1	1	1
9.1441	-108.705	1	1	1
9.18577	-110.133	1	1	1
9.22744	-111.091	1	1	1
9.2691	-112.793	1	1	1
9.31077	-114.108	1	1	1
9.35244	-115.474	1	1	1
9.3941	-116.901	1	1	1
9.43577	-118.369	1	1	1
9.47744	-119.817	1	1	1
9.5191	-121.346	1	1	1
9.56077	-122.915	1	1	1
9.60244	-124.22	1	1	1
9.6441	-125.688	1	1	1
9.68577	-127.299	1	1	1
9.72744	-128.797	1	1	1
9.7691	-130.418	1	1	1
9.81077	-131.978	1	1	1
9.85244	-133.639	1	1	1
9.8941	-135.27	1	1	1
9.93577	-136.922	1	1	1
9.97744	-138.573	1	1	1
10.0191	-140.173	1	1	1
10.0608	-141.784	1	1	1
10.1024	-143.466	1	1	1
10.1441	-145.107	1	1	1
10.1858	-146.84	1	1	1
10.2274	-148.43	1	1	1
10.2691	-150.031	1	1	1
10.3108	-151.641	1	1	1
10.3524	-153.201	1	1	1
10.3941	-154.811	1	1	1
10.4358	-156.361	1	1	1
10.4774	-157.931	1	1	1
10.5191	-159.45	1	1	1
10.5608	-160.907	1	1	1
10.6024	-162.161	1	1	1
10.6441	-163.588	1	1	1
10.6858	-165.066	1	1	1
10.7274	-166.544	1	1	1
10.7691	-168.043	1	1	1
10.8108	-169.48	1	1	1
10.8524	-170.826	1	1	1
10.8941	-172.13	1	1	1
10.9358	-173.527	1	1	1
10.9774	-174.913	1	1	1
11.0191	-176.239	1	1	1
11.0608	-177.594	1	1	1
11.1024	-178.94	1	1	1
11.1441	-180.275	1	1	1
11.1858	-181.682	1	1	1
11.2274	-182.589	1	1	1
11.2691	-184.373	1	1	1
11.3108	-185.78	1	1	1
11.3524	-186.86	1	1	1
11.3941	-187.982	1	1	1
11.4358	-189.918	1	1	1
11.4774	-191.774	1	1	1
11.5191	-193.476	1	1	1
11.5608	-195.27	1	1	1
11.6024	-196.096	1	1	1
11.6441	-198.502	1	1	1
11.6858	-200.082	1	1	1
11.7274	-201.753	1	1	1
11.7691	-203.303	1	1	1
11.8108	-204.822	1	1	1
11.8524	-206.514	1	1	1
11.8941	-208.206	1	1	1
11.9358	-209.867	1	1	1
11.9774	-211.611	1	1	1
12.0191	-213.293	1	1	1
12.0608	-215.046	1	1	1
12.1024	-216.809	1	1	1
12.1441	-218.654	1	1	1
12.1858	-220.571	1	1	1
12.2274	-221.621	1	1	1
12.2691	-223.71	1	1	1
12.3108	-225.77	1	1	1
12.3524	-227.849	1	1	1
12.3941	-229.898	1	1	1
12.4358	-231.988	1	1	1
12.4774	-234.149	1	1	1
12.5191	-236.483	1	1	1
12.5608	-238.705	1	1	1
12.6024	-241.213	1	1	1
12.6441	-243.68	1	1	1
12.6858	-246.106	1	1	1
12.7274	-248.97	1	1	1
12.7691	-251.498	1	1	1
12.8108	-254.343	1	1	1
12.8524	-257.115	1	1	1
12.8941	-260.163	1	1	1
12.9358	-263.242	1	1	1
12.9774	-266.473	1	1	1
13.0191	-269.643	1	1	1
13.0608	-273.282	1	1	1
13.1024	-276.891	1	1	1
13.1441	-280.765	1	1	1
13.1858	-284.343	1	1	1
13.2274	-288.777	1	1	1
13.2691	-293.15	1	1	1
13.3108	-297.105	1	1	1
13.3524	-302.008	1	1	1
13.3941	-306.758	1	1	1
13.4358	-311.611	1	1	1
13.4774	-316.83	1	1	1
13.5191	-321.774	1	1	1
13.5608	-327.074	1	1	1
13.6024	-332.762	1	1	1
13.6441	-338.767	1	1	1
13.6858	-340.163	1	1	1
13.7274	-351.254	1	1	1
13.7691	-359.185	1	1	1
13.8108	-366.911	1	1	1
13.8524	-374.292	1	1	1
13.8941	-381.651	1	1	1
13.9358	-390.245	1	1	1
13.9774	-398.461	1	1	1
14.0191	-406.697	1	1	1
14.0608	-415.515	1	1	1
14.1024	-424.822	1	1	1
14.1441	-434.444	1	1	1
14.1858	-444.781	1	1	1
14.2274	-452.334	1	1	1
14.2691	-458.135	1	1	1
14.3108	-472.895	1	1	1
14.3524	-485.545	1	1	1
14.3941	-497.268	1	1	1
14.4358	-508.909	1	1	1
14.4774	-520.968	1	1	1
14.5191	-534.322	1	1	1
14.5608	-547.971	1	1	1
14.6024	-560.683	1	1	1
14.6441	-574.75	1	1	1
14.6858	-590.194	1	1	1
14.7274	-604.271	1	1	1
14.7691	-619.653	1	1	1
14.8108	-635.087	1	1	1
14.8524	-651.305	1	1	1
14.8941	-667.92	1	1	1
14.9358	-687.146	1	1	1
14.9774	-704.699	1	1	1
15.0191	-724.526	1	1	1
15.0608	-745.076	1	1	1
15.1024	-766.789	1	1	1
15.1441	-788.644	1	1	1
15.1788	-806.85	1	1	1
17.8941	-8970.44	1	1	1
0.372626	0.939847	2	0	10000
0.743179	0.90818	2	0	10000
1.07154	0.883681	2	0	10000
1.63889	0.847233	2	0	10000
1.9841	0.826664	2	0	10000
2.21333	0.813713	2	0	10000
2.74394	0.782839	2	0	10000
2.97648	0.767763	2	0	10000
3.63904	0.722494	2	0	10000
3.97561	0.7002	2	0	10000
4.66172	0.657217	2	0	10000
5.16395	0.623536	2	0	10000
5.63797	0.592021	2	0	10000
6.08251	0.564916	2	0	10000
6.73725	0.526504	2	0	10000
7.85796	0.468765	2	0	10000
8.62464	0.429431	2	0	10000
9.59976	0.381877	2	0	10000
9.9339	0.366921	2	0	10000
10.5874	0.338011	2	0	10000
10.9437	0.321852	2	0	10000
11.5984	0.293424	2	0	10000
11.9726	0.274739	2	0	10000
12.592	0.244667	2	0	10000
13.0174	0.223256	2	0	10000
13.6561	0.192181	2	0	10000
14.0512	0.17482	2	0	10000
14.614	0.152366	2	0	10000
16.7386	0.0924218	2	0	10000
17.8593	0.0716119	2	0	10000
18.7494	0.0585806	2	0	10000
19.0057	0.0552526	2	0	10000
19.6521	0.0472334	2	0	10000
20.6505	0.0366079	2	0	10000
22.7628	0.0202085	2	0	10000

## Sheet: tens_interpolation
		Tens unten [hPa]	Tens oben [hPa]	Datum / Zeit
m_bot	b_bot	0.24	2.69	41210.7	2012-10-28 16:19:39			2012-10-28 16:19:39	-0.244648	-2.7421
-2.88	118687	0.22	2.68	41210.7	2012-10-28 16:29:39			2012-10-28 16:29:39	-0.224261	-2.73191
m_top	b_top	-118.883	-56.8715	2012-12-09 01:01:10	2012-12-09 01:01:10
-1.44	59346.1	y = m*x+b
		AE unten [t]	AE oben [t]
		41227.2
m_bot	b_bot	388.91	20.01	2012-12-29 09:41:17	388.91	20.01
-1.93629	80304.1	384.82	15.92	2012-12-31 12:23:00	384.82	15.92
m_top	b_top	387.892	18.9916	2012-12-29 22:18:40	2012-12-29 22:18:40
-1.93629	79935.2
