# Supplementary material for: A pore-size classification for peat bogs derived from unsaturated hydraulic properties
Source: Copernicus journal article supplement (doi:10.5194/hess-21-6185-2017), 2017-12-07
Supplement: Supplementary file 20 [file A332_7_HYDRUS_old.xlsx]

## Sheet: Gewicht
Datum / Zeit	Brutto-Gewicht [g]	Netto-Gewicht [g]	Gewichtsänderung [g]	Zeitintervall	Tage [d]	cum. Verdunstung [cm]	Verdunstungsrate [cm/d]	Theta [-]	Gewichtsabnahme Probe [g]	Abnahme rate [g]	Verdunstung [cm]	Volumen	249.4
2012-12-08 18:04:35	622.12	253.22	0		0			0.961909	253.22			Höhe	5
2012-12-09 03:01:10	614.178	245.278		0	0	0.159224	#DIV/0!	0.930064				A	49.88
2012-12-09 11:54:45	606.28	237.38	-15.84	0.370553	0.370553	0.158338	0.427302	0.930241	237.38			Theta0	0.961909
2012-12-09 19:47:36	600.17	231.27	-21.95	0.328359	0.698912	0.122494	0.373049	0.93741	231.27	21.95		Trockengewicht	13.32
2012-12-10 09:24:35	591.08	222.18	-31.04	0.567355	1.26627	0.182237	0.321205	0.925461	222.18	9.09		Ks (as in Ksat)
2012-12-10 17:41:41	585.95	217.05	-36.17	0.345209	1.61148	0.102847	0.297927	0.941339	217.05	5.13				Korrektur-Faktoren
2012-12-10 23:11:46	582.72	213.82	-39.4	0.229228	1.8407	0.0647554	0.282493	0.948957	213.82	3.23			12.26	Trockengewicht
2012-12-11 11:55:51	575.02	206.12	-47.1	0.530611	2.37131	0.15437	0.29093	0.931034	206.12	7.7				Handschuh
2012-12-11 17:30:43	571.26	202.36	-50.86	0.232544	2.60386	0.0753809	0.324158	0.946832	202.36	3.76
2012-12-12 09:24:48	559.97	191.07	-62.15	0.662556	3.26641	0.226343	0.341621	0.91664	191.07	11.29
2012-12-12 17:29:28	554.41	185.51	-67.71	0.336574	3.60299	0.111468	0.331183	0.939615	185.51	5.56
2012-12-13 09:57:28	543.69	174.79	-78.43	0.686109	4.2891	0.214916	0.313238	0.918925	174.79	10.72
2012-12-13 22:00:40	535.29	166.39	-86.83	0.502224	4.79132	0.168404	0.335317	0.928228	166.39	8.4
2012-12-14 09:23:15	527.43	158.53	-94.69	0.474024	5.26535	0.157578	0.332427	0.930393	158.53	7.86
2012-12-14 20:03:23	520.67	151.77	-101.45	0.444535	5.70988	0.135525	0.30487	0.934804	151.77	6.76
2012-12-15 11:46:13	511.09	142.19	-111.03	0.654742	6.36462	0.192061	0.293338	0.923496	142.19	9.58
2012-12-16 14:40:02	496.69	127.79	-125.43	1.12071	7.48533	0.288693	0.257599	0.90417	127.79	14.4
2012-12-17 09:04:04	486.88	117.98	-135.24	0.766686	8.25202	0.196672	0.256522	0.922574	117.98	9.81
2012-12-18 08:28:14	475.02	106.12	-147.1	0.975119	9.22713	0.237771	0.243838	0.914354	106.12	11.86
2012-12-18 16:29:23	471.29	102.39	-150.83	0.334136	9.56127	0.0747795	0.223799	0.946953	102.39	3.73
2012-12-19 08:10:28	464.08	95.18	-158.04	0.653523	10.2148	0.144547	0.221181	0.932999	95.18	7.21
2012-12-19 16:43:32	460.05	91.15	-162.07	0.356302	10.5711	0.0807939	0.226757	0.94575	91.15	4.03
2012-12-20 08:26:14	452.96	84.06	-169.16	0.654655	11.2258	0.142141	0.217124	0.93348	84.06	7.09
2012-12-20 17:25:06	448.3	79.4	-173.82	0.374212	11.6	0.0934242	0.249656	0.943224	79.4	4.66
2012-12-21 08:17:00	440.8	71.9	-181.32	0.619373	12.2193	0.150361	0.242763	0.931836	71.9	7.5
2012-12-21 18:29:34	435.46	66.56	-186.66	0.42539	12.6447	0.107057	0.251667	0.940497	66.56	5.34
2012-12-22 09:49:21	427.71	58.81	-194.41	0.63874	13.2835	0.155373	0.243249	0.930834	58.81	7.75
2012-12-22 19:18:18	423.38	54.48	-198.74	0.3951	13.6786	0.0868083	0.219713	0.944547	54.48	4.33
2012-12-23 08:48:45	417.78	48.88	-204.34	0.562822	14.2414	0.112269	0.199476	0.939455	48.88	5.6
2012-12-25 11:48:13	402.83	33.93	-219.29	2.12462	16.366	0.299719	0.141069	0.901965	33.93	14.95
2012-12-26 14:42:02	397.64	28.74	-224.48	1.12071	17.4867	0.10405	0.0928426	0.941099	28.74	5.19
2012-12-27 12:03:41	394.39	25.49	-227.73	0.890033	18.3768	0.0651564	0.0732067	0.948877	25.49	3.25
2012-12-27 18:12:51	393.56	24.66	-228.56	0.256368	18.6331	0.0166399	0.0649064	0.958581	24.66	0.83
2012-12-28 09:43:38	391.56	22.66	-230.56	0.646374	19.2795	0.0400962	0.0620326	0.953889	22.66	2
2012-12-29 09:41:17	388.91	20.01	-233.21	0.998374	20.2779	0.0531275	0.053214	0.951283	20.01	2.65
2012-12-31 12:23:00	384.82	15.92	-237.3	2.11229	22.3902	0.0819968	0.0388189	0.945509	15.92	4.09

## Sheet: Evap_Theta
Zeit	cum. Verdunstung [cm]	Verdunstungsrate [cm/d]	Theta [-]
0.370553	0.158338	0.427302	0.930241
0.698912	0.122494	0.373049	0.93741
1.26627	0.304731	0.321205	0.900962
1.61148	0.407578	0.297927	0.880393
1.8407	0.472334	0.282493	0.867442
2.37131	0.626704	0.29093	0.836568
2.60386	0.702085	0.324158	0.821492
3.26641	0.928428	0.341621	0.776223
3.60299	1.0399	0.331183	0.753929
4.2891	1.25481	0.313238	0.710946
4.79132	1.42322	0.335317	0.677265
5.26535	1.58079	0.332427	0.64575
5.70988	1.71632	0.30487	0.618645
6.36462	1.90838	0.293338	0.580233
7.48533	2.19707	0.257599	0.522494
8.25202	2.39374	0.256522	0.48316
9.22713	2.63152	0.243838	0.435605
9.56127	2.7063	0.223799	0.42065
10.2148	2.85084	0.221181	0.39174
10.5711	2.93164	0.226757	0.375581
11.2258	3.07378	0.217124	0.347153
11.6	3.1672	0.249656	0.328468
12.2193	3.31756	0.242763	0.298396
12.6447	3.42462	0.251667	0.276985
13.2835	3.57999	0.243249	0.24591
13.6786	3.6668	0.219713	0.228549
14.2414	3.77907	0.199476	0.206095
16.366	4.07879	0.141069	0.146151
17.4867	4.18284	0.0928426	0.125341
18.3768	4.248	0.0732067	0.11231
18.6331	4.26464	0.0649064	0.108982
19.2795	4.30473	0.0620326	0.100962
20.2779	4.35786	0.053214	0.0903368
22.3902	4.43986	0.0388189	0.0739374

## Sheet: Tensionen
Datum / Zeit	Tension unten [hPa]	Tension oben [hPa]	Datum / Zeit	Zeit [d]		Zeit [d]	MP bot(2) [cm]	MP top(1) [cm]		Versuchsbeginn
2012-12-08 17:51:08	2.74	5.18	22.01	-0.381964		-0.381964	-2.79307	-5.28033		2012-12-09 03:01:10
2012-12-08 17:52:08	2.78	5.2	22.02	-0.38127		-0.38127	-2.83384	-5.30071
2012-12-08 17:53:08	2.78	5.2	22.02	-0.380575		-0.380575	-2.83384	-5.30071
2012-12-08 17:54:08	2.81	5.21	22.03	-0.379881		-0.379881	-2.86442	-5.31091
2012-12-08 17:55:08	2.83	5.23	22.04	-0.379187		-0.379187	-2.88481	-5.33129
2012-12-08 17:56:08	2.85	5.34	22.04	-0.378492		-0.378492	-2.9052	-5.44343
2012-12-08 17:57:08	2.89	5.29	22.04	-0.377798		-0.377798	-2.94597	-5.39246
2012-12-08 17:58:08	2.92	5.32	22.05	-0.377103		-0.377103	-2.97655	-5.42304
2012-12-08 17:59:08	2.93	5.33	22.05	-0.376409		-0.376409	-2.98675	-5.43323
2012-12-08 18:00:08	2.97	5.35	22.06	-0.375714		-0.375714	-3.02752	-5.45362
2012-12-08 18:01:08	3	5.38	22.06	-0.37502		-0.37502	-3.0581	-5.4842
2012-12-08 18:02:08	3.02	5.41	22.07	-0.374325		-0.374325	-3.07849	-5.51478
2012-12-08 18:03:08	3.04	5.43	22.07	-0.373631		-0.373631	-3.09888	-5.53517
2012-12-08 18:04:08	3.05	5.43	22.08	-0.372937		-0.372937	-3.10907	-5.53517
2012-12-08 18:05:08	2.48	4.86	22.08	-0.372242		-0.372242	-2.52803	-4.95413
2012-12-08 18:06:08	2.51	4.89	22.08	-0.371548		-0.371548	-2.55861	-4.98471
2012-12-08 18:07:08	2.54	4.94	22.09	-0.370853		-0.370853	-2.58919	-5.03568
2012-12-08 18:08:08	2.55	4.95	22.09	-0.370159		-0.370159	-2.59939	-5.04587
2012-12-08 18:09:08	2.57	4.97	22.09	-0.369464		-0.369464	-2.61978	-5.06626
2012-12-08 18:10:08	2.6	5	22.1	-0.36877		-0.36877	-2.65036	-5.09684
2012-12-08 18:11:08	2.61	5.01	22.11	-0.368075		-0.368075	-2.66055	-5.10703
2012-12-08 18:12:08	2.63	5.02	22.12	-0.367381		-0.367381	-2.68094	-5.11723
2012-12-08 18:13:08	2.66	5.05	22.13	-0.366687		-0.366687	-2.71152	-5.14781
2012-12-08 18:14:08	2.67	5.07	22.14	-0.365992		-0.365992	-2.72171	-5.1682
2012-12-08 18:15:08	2.71	5.08	22.15	-0.365298		-0.365298	-2.76249	-5.17839
2012-12-08 18:16:08	2.73	5.11	22.15	-0.364603		-0.364603	-2.78287	-5.20897
2012-12-08 18:17:08	2.77	5.14	22.16	-0.363909		-0.363909	-2.82365	-5.23955
2012-12-08 18:18:08	2.78	5.17	22.17	-0.363214		-0.363214	-2.83384	-5.27013
2012-12-08 18:19:08	2.79	5.18	22.18	-0.36252		-0.36252	-2.84404	-5.28033
2012-12-08 18:20:08	2.84	5.23	22.18	-0.361825		-0.361825	-2.89501	-5.33129
2012-12-08 18:21:08	2.85	5.24	22.19	-0.361131		-0.361131	-2.9052	-5.34149
2012-12-08 18:22:08	2.89	5.26	22.19	-0.360437		-0.360437	-2.94597	-5.36188
2012-12-08 18:23:08	2.91	5.3	22.2	-0.359742		-0.359742	-2.96636	-5.40265
2012-12-08 18:24:08	2.93	5.31	22.2	-0.359048		-0.359048	-2.98675	-5.41284
2012-12-08 18:25:08	2.97	5.35	22.2	-0.358353		-0.358353	-3.02752	-5.45362
2012-12-08 18:26:08	2.98	5.35	22.2	-0.357659		-0.357659	-3.03772	-5.45362
2012-12-08 18:27:08	3	5.39	22.2	-0.356964		-0.356964	-3.0581	-5.49439
2012-12-08 18:28:08	3.03	5.41	22.2	-0.35627		-0.35627	-3.08869	-5.51478
2012-12-08 18:29:08	3.05	5.43	22.2	-0.355575		-0.355575	-3.10907	-5.53517
2012-12-08 18:30:08	3.08	5.46	22.2	-0.354881		-0.354881	-3.13965	-5.56575
2012-12-08 18:31:08	3.1	5.48	22.2	-0.354187		-0.354187	-3.16004	-5.58614
2012-12-08 18:32:08	3.14	5.52	22.2	-0.353492		-0.353492	-3.20082	-5.62691
2012-12-08 18:33:08	3.18	5.55	22.19	-0.352798		-0.352798	-3.24159	-5.65749
2012-12-08 18:34:08	3.19	5.58	22.19	-0.352103		-0.352103	-3.25178	-5.68807
2012-12-08 18:35:08	3.23	5.59	22.19	-0.351409		-0.351409	-3.29256	-5.69827
2012-12-08 18:36:08	3.25	5.62	22.18	-0.350714		-0.350714	-3.31295	-5.72885
2012-12-08 18:37:08	3.27	5.65	22.18	-0.35002		-0.35002	-3.33333	-5.75943
2012-12-08 18:38:08	3.3	5.67	22.17	-0.349325		-0.349325	-3.36391	-5.77982
2012-12-08 18:39:08	3.32	5.69	22.16	-0.348631		-0.348631	-3.3843	-5.8002
2012-12-08 18:40:08	3.35	5.71	22.16	-0.347937		-0.347937	-3.41488	-5.82059
2012-12-08 18:41:08	3.38	5.75	22.15	-0.347242		-0.347242	-3.44546	-5.86137
2012-12-08 18:42:08	3.39	5.78	22.15	-0.346548		-0.346548	-3.45566	-5.89195
2012-12-08 18:43:08	3.41	5.8	22.14	-0.345853		-0.345853	-3.47604	-5.91233
2012-12-08 18:44:08	3.46	5.84	22.13	-0.345159		-0.345159	-3.52701	-5.95311
2012-12-08 18:45:08	3.48	5.87	22.12	-0.344464		-0.344464	-3.5474	-5.98369
2012-12-08 18:46:08	3.5	5.88	22.12	-0.34377		-0.34377	-3.56779	-5.99388
2012-12-08 18:47:08	3.54	5.91	22.11	-0.343075		-0.343075	-3.60856	-6.02446
2012-12-08 18:48:08	3.55	5.93	22.1	-0.342381		-0.342381	-3.61876	-6.04485
2012-12-08 18:49:08	3.57	5.95	22.09	-0.341687		-0.341687	-3.63914	-6.06524
2012-12-08 18:50:08	3.61	6	22.09	-0.340992		-0.340992	-3.67992	-6.11621
2012-12-08 18:51:08	3.63	6.02	22.08	-0.340298		-0.340298	-3.70031	-6.1366
2012-12-08 19:01:08	3.89	6.26	21.99	-0.333353		-0.333353	-3.96534	-6.38124
2012-12-08 19:11:08	4.09	6.49	21.9	-0.326409		-0.326409	-4.16922	-6.6157
2012-12-08 19:21:08	4.35	6.77	21.8	-0.319464		-0.319464	-4.43425	-6.90112
2012-12-08 19:31:08	4.57	6.99	21.71	-0.31252		-0.31252	-4.65851	-7.12538
2012-12-08 19:41:08	3.74	6.17	21.61	-0.305575		-0.305575	-3.81244	-6.2895
2012-12-08 19:51:08	4.15	6.59	21.52	-0.298631		-0.298631	-4.23038	-6.71764
2012-12-08 20:01:08	4.49	6.94	21.44	-0.291687		-0.291687	-4.57696	-7.07441
2012-12-08 20:11:08	4.77	7.22	21.35	-0.284742		-0.284742	-4.86239	-7.35984
2012-12-08 20:21:08	3.97	6.43	21.28	-0.277798		-0.277798	-4.04689	-6.55454
2012-12-08 20:31:08	4.39	6.86	21.2	-0.270853		-0.270853	-4.47503	-6.99286
2012-12-08 20:41:08	4.71	7.18	21.13	-0.263909		-0.263909	-4.80122	-7.31906
2012-12-08 20:51:08	3.71	6.12	21.06	-0.256964		-0.256964	-3.78186	-6.23853
2012-12-08 21:01:08	4.2	6.68	21	-0.25002		-0.25002	-4.28135	-6.80938
2012-12-08 21:11:08	4.57	7.06	20.94	-0.243075		-0.243075	-4.65851	-7.19674
2012-12-08 21:21:08	4.89	7.37	20.88	-0.236131		-0.236131	-4.98471	-7.51274
2012-12-08 21:31:08	4.22	6.72	20.83	-0.229187		-0.229187	-4.30173	-6.85015
2012-12-08 21:41:08	4.62	7.12	20.78	-0.222242		-0.222242	-4.70948	-7.2579
2012-12-08 21:51:08	4.94	7.45	20.73	-0.215298		-0.215298	-5.03568	-7.59429
2012-12-08 22:01:08	3.9	6.4	20.69	-0.208353		-0.208353	-3.97554	-6.52396
2012-12-08 22:11:08	4.36	6.86	20.65	-0.201409		-0.201409	-4.44444	-6.99286
2012-12-08 22:21:08	4.71	7.22	20.61	-0.194464		-0.194464	-4.80122	-7.35984
2012-12-08 22:31:08	5.04	7.57	20.58	-0.18752		-0.18752	-5.13761	-7.71662
2012-12-08 22:41:08	3.82	6.34	20.54	-0.180575		-0.180575	-3.89399	-6.46279
2012-12-08 22:51:08	4.25	6.79	20.51	-0.173631		-0.173631	-4.33231	-6.92151
2012-12-08 23:01:08	4.62	7.15	20.48	-0.166687		-0.166687	-4.70948	-7.28848
2012-12-08 23:11:08	4.95	7.48	20.45	-0.159742		-0.159742	-5.04587	-7.62487
2012-12-08 23:21:08	5.26	7.8	20.42	-0.152798		-0.152798	-5.36188	-7.95107
2012-12-08 23:31:08	3.48	6.01	20.4	-0.145853		-0.145853	-3.5474	-6.1264
2012-12-08 23:41:08	3.52	6.05	20.38	-0.138909		-0.138909	-3.58818	-6.16718
2012-12-08 23:51:08	3.6	6.16	20.36	-0.131964		-0.131964	-3.66972	-6.27931
2012-12-09 00:01:08	3.7	6.25	20.33	-0.12502		-0.12502	-3.77166	-6.37105
2012-12-09 00:11:08	3.77	6.32	20.31	-0.118075		-0.118075	-3.84302	-6.44241
2012-12-09 00:21:08	3.84	6.41	20.29	-0.111131		-0.111131	-3.91437	-6.53415
2012-12-09 00:31:08	4	6.56	20.27	-0.104187		-0.104187	-4.07747	-6.68705
2012-12-09 00:41:08	4.17	6.71	20.26	-0.0972421		-0.0972421	-4.25076	-6.83996
2012-12-09 00:51:08	3.89	6.45	20.24	-0.0902977		-0.0902977	-3.96534	-6.57492
2012-12-09 01:01:08	3.78	6.34	20.22	-0.0833532		-0.0833532	-3.85321	-6.46279
2012-12-09 01:11:08	3.88	6.42	20.21	-0.0764088		-0.0764088	-3.95515	-6.54434
2012-12-09 01:21:08	3.98	6.55	20.2	-0.0694643		-0.0694643	-4.05708	-6.67686
2012-12-09 01:31:08	4.08	6.64	20.18	-0.0625199		-0.0625199	-4.15902	-6.7686
2012-12-09 01:41:08	4.18	6.76	20.17	-0.0555754		-0.0555754	-4.26096	-6.89093
2012-12-09 01:51:08	4.24	6.81	20.16	-0.048631		-0.048631	-4.32212	-6.9419
2012-12-09 02:01:08	4.36	6.92	20.15	-0.0416866		-0.0416866	-4.44444	-7.05403
2012-12-09 02:11:08	4.48	7.05	20.14	-0.0347421		-0.0347421	-4.56677	-7.18654
2012-12-09 02:21:08	4.61	7.18	20.13	-0.0277977		-0.0277977	-4.69929	-7.31906
2012-12-09 02:31:08	4.79	7.35	20.12	-0.0208532		-0.0208532	-4.88277	-7.49235
2012-12-09 02:41:08	4.63	7.19	20.11	-0.0139088		-0.0139088	-4.71967	-7.32926
2012-12-09 02:51:08	4.86	7.42	20.11	-0.00696434		-0.00696434	-4.95413	-7.56371
2012-12-09 03:01:08	4.2	6.77	20.11	-1.98929e-05		-1.98929e-05	-4.28135	-6.90112
2012-12-09 03:11:08	4.36	6.91	20.1	0.00692455	41252.1	0.00692455	-4.44444	-7.04383
2012-12-09 03:21:08	4.48	7.04	20.1	0.013869		0.013869	-4.56677	-7.17635
2012-12-09 03:31:08	4.5	7.07	20.1	0.0208134		0.0208134	-4.58716	-7.20693
2012-12-09 03:41:08	4.65	7.21	20.1	0.0277579		0.0277579	-4.74006	-7.34964
2012-12-09 03:51:08	4.73	7.29	20.1	0.0347023		0.0347023	-4.82161	-7.43119
2012-12-09 04:01:08	4.74	7.31	20.1	0.0416468		0.0416468	-4.8318	-7.45158
2012-12-09 04:11:08	4.81	7.36	20.1	0.0485912	41252.2	0.0485912	-4.90316	-7.50255
2012-12-09 04:21:08	4.87	7.47	20.1	0.0555357		0.0555357	-4.96432	-7.61468
2012-12-09 04:31:08	5.03	7.58	20.11	0.0624801		0.0624801	-5.12742	-7.72681
2012-12-09 04:41:08	5.12	7.68	20.12	0.0694246		0.0694246	-5.21916	-7.82875
2012-12-09 04:51:08	5.26	7.82	20.12	0.076369		0.076369	-5.36188	-7.97146
2012-12-09 05:01:08	5.41	7.97	20.13	0.0833134		0.0833134	-5.51478	-8.12436
2012-12-09 05:11:08	5.49	8.05	20.13	0.0902579	41252.2	0.0902579	-5.59633	-8.20591
2012-12-09 05:21:08	5.62	8.17	20.14	0.0972023		0.0972023	-5.72885	-8.32824
2012-12-09 05:31:08	5.73	8.29	20.14	0.104147		0.104147	-5.84098	-8.45056
2012-12-09 05:41:08	5.86	8.41	20.14	0.111091		0.111091	-5.9735	-8.57288
2012-12-09 05:51:08	6.01	8.57	20.14	0.118036		0.118036	-6.1264	-8.73598
2012-12-09 06:01:08	6.12	8.68	20.14	0.12498		0.12498	-6.23853	-8.84811
2012-12-09 06:11:08	6.3	8.85	20.14	0.131925	41252.3	0.131925	-6.42202	-9.02141
2012-12-09 06:21:08	6.43	8.99	20.14	0.138869		0.138869	-6.55454	-9.16412
2012-12-09 06:31:08	6.53	9.09	20.14	0.145813		0.145813	-6.65647	-9.26606
2012-12-09 06:41:08	6.66	9.22	20.14	0.152758		0.152758	-6.78899	-9.39857
2012-12-09 06:51:08	6.78	9.33	20.15	0.159702		0.159702	-6.91131	-9.5107
2012-12-09 07:01:08	6.91	9.48	20.15	0.166647		0.166647	-7.04383	-9.66361
2012-12-09 07:11:08	7.04	9.59	20.15	0.173591	41252.3	0.173591	-7.17635	-9.77574
2012-12-09 07:21:08	7.18	9.73	20.15	0.180536		0.180536	-7.31906	-9.91845
2012-12-09 07:31:08	7.28	9.84	20.15	0.18748		0.18748	-7.421	-10.0306
2012-12-09 07:41:08	7.27	9.83	20.15	0.194425		0.194425	-7.41081	-10.0204
2012-12-09 07:51:08	7.41	9.97	20.15	0.201369		0.201369	-7.55352	-10.1631
2012-12-09 08:01:08	7.53	10.08	20.15	0.208313		0.208313	-7.67584	-10.2752
2012-12-09 08:11:08	7.64	10.2	20.15	0.215258	41252.3	0.215258	-7.78797	-10.3976
2012-12-09 08:21:08	7.7	10.27	20.15	0.222202		0.222202	-7.84913	-10.4689
2012-12-09 08:31:08	7.8	10.36	20.16	0.229147		0.229147	-7.95107	-10.5607
2012-12-09 08:41:08	7.9	10.47	20.16	0.236091		0.236091	-8.05301	-10.6728
2012-12-09 08:51:08	8.01	10.57	20.17	0.243036		0.243036	-8.16514	-10.7747
2012-12-09 09:01:08	7.89	10.46	20.17	0.24998		0.24998	-8.04281	-10.6626
2012-12-09 09:11:08	8.05	10.61	20.17	0.256925	41252.4	0.256925	-8.20591	-10.8155
2012-12-09 09:21:08	8.16	10.71	20.17	0.263869		0.263869	-8.31804	-10.9174
2012-12-09 09:31:08	8.27	10.82	20.17	0.270813		0.270813	-8.43017	-11.0296
2012-12-09 09:41:08	8.01	10.56	20.17	0.277758		0.277758	-8.16514	-10.7645
2012-12-09 09:51:08	8.22	10.79	20.17	0.284702		0.284702	-8.3792	-10.999
2012-12-09 10:01:08	8.28	10.83	20.17	0.291647		0.291647	-8.44037	-11.0398
2012-12-09 10:11:08	8.43	10.98	20.17	0.298591	41252.4	0.298591	-8.59327	-11.1927
2012-12-09 10:21:08	8.47	11.02	20.17	0.305536		0.305536	-8.63405	-11.2334
2012-12-09 10:31:08	8.61	11.15	20.17	0.31248		0.31248	-8.77676	-11.366
2012-12-09 10:41:08	8.71	11.27	20.17	0.319425		0.319425	-8.8787	-11.4883
2012-12-09 10:51:08	8.82	11.4	20.17	0.326369		0.326369	-8.99083	-11.6208
2012-12-09 11:01:08	8.89	11.45	20.17	0.333313		0.333313	-9.06218	-11.6718
2012-12-09 11:11:08	8.82	11.39	20.17	0.340258	41252.5	0.340258	-8.99083	-11.6106
2012-12-09 11:21:08	8.97	11.52	20.17	0.347202		0.347202	-9.14373	-11.7431
2012-12-09 11:31:08	9.11	11.66	20.17	0.354147		0.354147	-9.28644	-11.8858
2012-12-09 11:41:08	9.13	11.69	20.16	0.361091		0.361091	-9.30683	-11.9164
2012-12-09 11:51:08	8.87	11.44	20.15	0.368036		0.368036	-9.04179	-11.6616
2012-12-09 12:01:08	8.82	11.38	20.14	0.37498		0.37498	-8.99083	-11.6004
2012-12-09 12:11:08	8.81	11.35	20.19	0.381925	41252.5	0.381925	-8.98063	-11.5698
2012-12-09 12:21:08	8.97	11.5	20.25	0.388869		0.388869	-9.14373	-11.7227
2012-12-09 12:31:08	9.11	11.64	20.27	0.395813		0.395813	-9.28644	-11.8654
2012-12-09 12:41:08	9.2	11.73	20.28	0.402758		0.402758	-9.37819	-11.9572
2012-12-09 12:51:08	9.28	11.82	20.29	0.409702		0.409702	-9.45973	-12.0489
2012-12-09 13:11:08	9.45	11.96	20.3	0.423591		0.423591	-9.63303	-12.1916
2012-12-09 13:21:08	9.54	12.08	20.31	0.430536	41252.6	0.430536	-9.72477	-12.314
2012-12-09 13:31:08	9.61	12.13	20.31	0.43748		0.43748	-9.79613	-12.3649
2012-12-09 13:41:08	9.74	12.27	20.31	0.444425		0.444425	-9.92864	-12.5076
2012-12-09 13:51:08	9.81	12.31	20.32	0.451369		0.451369	-10	-12.5484
2012-12-09 14:01:08	9.91	12.45	20.32	0.458313		0.458313	-10.1019	-12.6911
2012-12-09 14:11:08	9.56	12.08	20.33	0.465258		0.465258	-9.74516	-12.314
2012-12-09 14:21:08	9.74	12.26	20.33	0.472202	41252.6	0.472202	-9.92864	-12.4975
2012-12-09 14:31:08	9.85	12.37	20.33	0.479147		0.479147	-10.0408	-12.6096
2012-12-09 14:41:08	9.95	12.47	20.34	0.486091		0.486091	-10.1427	-12.7115
2012-12-09 14:51:08	10.05	12.57	20.35	0.493036		0.493036	-10.2446	-12.8135
2012-12-09 15:01:08	10.02	12.52	20.36	0.49998		0.49998	-10.2141	-12.7625
2012-12-09 15:11:08	10.15	12.65	20.36	0.506925		0.506925	-10.3466	-12.895
2012-12-09 15:31:08	10.34	12.85	20.38	0.520813	41252.6	0.520813	-10.5403	-13.0989
2012-12-09 15:41:08	10.41	12.91	20.39	0.527758		0.527758	-10.6116	-13.16
2012-12-09 15:51:08	10.46	12.98	20.4	0.534702		0.534702	-10.6626	-13.2314
2012-12-09 16:01:08	10.51	13.03	20.4	0.541647		0.541647	-10.7136	-13.2824
2012-12-09 16:11:08	10.54	13.07	20.41	0.548591		0.548591	-10.7441	-13.3231
2012-12-09 16:21:08	10.64	13.16	20.44	0.555536		0.555536	-10.8461	-13.4149
2012-12-09 16:31:08	10.72	13.26	20.49	0.56248	41252.7	0.56248	-10.9276	-13.5168
2012-12-09 16:41:08	11.81	12.98	20.54	0.569425		0.569425	-12.0387	-13.2314
2012-12-09 16:51:08	10.42	12.91	20.61	0.576369		0.576369	-10.6218	-13.16
2012-12-09 17:01:08	10.61	13.1	20.69	0.583313		0.583313	-10.8155	-13.3537
2012-12-09 17:11:08	10.67	13.17	20.77	0.590258		0.590258	-10.8767	-13.4251
2012-12-09 17:21:08	10.72	13.23	20.85	0.597202		0.597202	-10.9276	-13.4862
2012-12-09 17:31:08	10.85	13.32	20.91	0.604147	41252.7	0.604147	-11.0601	-13.578
2012-12-09 17:41:08	10.94	13.39	20.93	0.611091		0.611091	-11.1519	-13.6493
2012-12-09 17:51:08	11.01	13.46	20.94	0.618036		0.618036	-11.2232	-13.7207
2012-12-09 18:01:08	11.13	13.57	20.93	0.62498		0.62498	-11.3456	-13.8328
2012-12-09 18:11:08	11.24	13.68	20.93	0.631925		0.631925	-11.4577	-13.945
2012-12-09 18:21:08	11.3	13.74	20.93	0.638869		0.638869	-11.5189	-14.0061
2012-12-09 18:31:08	11.4	13.84	20.92	0.645813	41252.8	0.645813	-11.6208	-14.1081
2012-12-09 18:41:08	11.48	13.92	20.91	0.652758		0.652758	-11.7023	-14.1896
2012-12-09 18:51:08	11.54	13.99	20.9	0.659702		0.659702	-11.7635	-14.261
2012-12-09 19:01:08	11.58	14.03	20.88	0.666647		0.666647	-11.8043	-14.3017
2012-12-09 19:11:08	11.66	14.12	20.87	0.673591		0.673591	-11.8858	-14.3935
2012-12-09 19:21:08	11.75	14.19	20.85	0.680536		0.680536	-11.9776	-14.4648
2012-12-09 19:31:08	11.86	14.33	20.84	0.68748	41252.8	0.68748	-12.0897	-14.6075
2012-12-09 19:41:08	11.92	14.38	20.83	0.694425		0.694425	-12.1509	-14.6585
2012-12-09 19:51:08	11.91	14.37	20.81	0.701369		0.701369	-12.1407	-14.6483
2012-12-09 20:01:08	12.01	14.48	20.83	0.708313		0.708313	-12.2426	-14.7604
2012-12-09 20:11:08	12.08	14.54	20.84	0.715258		0.715258	-12.314	-14.8216
2012-12-09 20:21:08	12.09	14.56	20.83	0.722202		0.722202	-12.3242	-14.842
2012-12-09 20:31:08	12.15	14.61	20.82	0.729147	41252.9	0.729147	-12.3853	-14.893
2012-12-09 20:41:08	11.96	14.42	20.82	0.736091		0.736091	-12.1916	-14.6993
2012-12-09 20:51:08	12.14	14.61	20.81	0.743036		0.743036	-12.3751	-14.893
2012-12-09 21:01:08	12.23	14.69	20.8	0.74998		0.74998	-12.4669	-14.9745
2012-12-09 21:11:08	12.34	14.81	20.8	0.756925		0.756925	-12.579	-15.0968
2012-12-09 21:21:08	12.37	14.85	20.79	0.763869		0.763869	-12.6096	-15.1376
2012-12-09 21:31:08	12.47	14.94	20.79	0.770813	41252.9	0.770813	-12.7115	-15.2294
2012-12-09 21:41:08	12.53	15	20.78	0.777758		0.777758	-12.7727	-15.2905
2012-12-09 21:51:08	12.55	15.02	20.77	0.784702		0.784702	-12.7931	-15.3109
2012-12-09 22:01:08	12.58	15.05	20.77	0.791647		0.791647	-12.8236	-15.3415
2012-12-09 22:11:08	12.67	15.15	20.76	0.798591		0.798591	-12.9154	-15.4434
2012-12-09 22:21:08	12.76	15.24	20.76	0.805536		0.805536	-13.0071	-15.5352
2012-12-09 22:31:08	12.83	15.31	20.75	0.81248	41252.9	0.81248	-13.0785	-15.6065
2012-12-09 22:41:08	12.89	15.37	20.75	0.819425		0.819425	-13.1397	-15.6677
2012-12-09 22:51:08	12.96	15.43	20.74	0.826369		0.826369	-13.211	-15.7288
2012-12-09 23:01:08	13.04	15.52	20.74	0.833313		0.833313	-13.2926	-15.8206
2012-12-09 23:11:08	13	15.47	20.73	0.840258		0.840258	-13.2518	-15.7696
2012-12-09 23:21:08	13.1	15.58	20.73	0.847202		0.847202	-13.3537	-15.8818
2012-12-09 23:31:08	13.16	15.62	20.73	0.854147	41253	0.854147	-13.4149	-15.9225
2012-12-09 23:41:08	13.14	15.6	20.73	0.861091		0.861091	-13.3945	-15.9021
2012-12-09 23:51:08	13.28	15.75	20.73	0.868036		0.868036	-13.5372	-16.055
2012-12-10 00:01:08	13.27	15.72	20.73	0.87498		0.87498	-13.527	-16.0245
2012-12-10 00:11:08	13.37	15.83	20.72	0.881925		0.881925	-13.629	-16.1366
2012-12-10 00:21:08	13.45	15.91	20.72	0.888869		0.888869	-13.7105	-16.2181
2012-12-10 00:31:08	13.53	15.98	20.72	0.895813	41253	0.895813	-13.792	-16.2895
2012-12-10 00:41:08	13.59	16.05	20.72	0.902758		0.902758	-13.8532	-16.3609
2012-12-10 00:51:08	13.63	16.09	20.72	0.909702		0.909702	-13.894	-16.4016
2012-12-10 01:01:08	13.71	16.16	20.72	0.916647		0.916647	-13.9755	-16.473
2012-12-10 01:11:08	13.76	16.21	20.73	0.923591		0.923591	-14.0265	-16.524
2012-12-10 01:21:08	13.83	16.29	20.73	0.930536		0.930536	-14.0979	-16.6055
2012-12-10 01:31:08	13.78	16.24	20.73	0.93748	41253.1	0.93748	-14.0469	-16.5545
2012-12-10 01:41:08	13.84	16.3	20.73	0.944425		0.944425	-14.1081	-16.6157
2012-12-10 01:51:08	13.9	16.36	20.73	0.951369		0.951369	-14.1692	-16.6769
2012-12-10 02:01:08	13.98	16.44	20.73	0.958313		0.958313	-14.2508	-16.7584
2012-12-10 02:11:08	14.07	16.53	20.74	0.965258		0.965258	-14.3425	-16.8502
2012-12-10 02:21:08	14.1	16.55	20.74	0.972202		0.972202	-14.3731	-16.8705
2012-12-10 02:31:08	14.17	16.62	20.74	0.979147	41253.1	0.979147	-14.4444	-16.9419
2012-12-10 02:41:08	14.15	16.62	20.74	0.986091		0.986091	-14.4241	-16.9419
2012-12-10 02:51:08	14.24	16.7	20.74	0.993036		0.993036	-14.5158	-17.0234
2012-12-10 03:01:08	14.29	16.76	20.74	0.99998		0.99998	-14.5668	-17.0846
2012-12-10 03:11:08	14.35	16.81	20.74	1.00692		1.00692	-14.6279	-17.1356
2012-12-10 03:21:08	14.4	16.86	20.74	1.01387		1.01387	-14.6789	-17.1865
2012-12-10 03:31:08	14.44	16.91	20.74	1.02081	41253.1	1.02081	-14.7197	-17.2375
2012-12-10 03:41:08	14.5	16.96	20.74	1.02776		1.02776	-14.7808	-17.2885
2012-12-10 03:51:08	14.56	17.01	20.74	1.0347		1.0347	-14.842	-17.3394
2012-12-10 04:01:08	14.63	17.08	20.74	1.04165		1.04165	-14.9134	-17.4108
2012-12-10 04:11:08	14.7	17.16	20.74	1.04859		1.04859	-14.9847	-17.4924
2012-12-10 04:21:08	14.74	17.2	20.75	1.05554		1.05554	-15.0255	-17.5331
2012-12-10 04:31:08	14.83	17.29	20.75	1.06248	41253.2	1.06248	-15.1172	-17.6249
2012-12-10 04:41:08	14.91	17.37	20.76	1.06942		1.06942	-15.1988	-17.7064
2012-12-10 04:51:08	14.95	17.41	20.76	1.07637		1.07637	-15.2396	-17.7472
2012-12-10 05:01:08	15.05	17.51	20.76	1.08331		1.08331	-15.3415	-17.8491
2012-12-10 05:11:08	15.08	17.54	20.77	1.09026		1.09026	-15.3721	-17.8797
2012-12-10 05:21:08	15.14	17.59	20.78	1.0972		1.0972	-15.4332	-17.9307
2012-12-10 05:31:08	15.08	17.54	20.78	1.10415	41253.2	1.10415	-15.3721	-17.8797
2012-12-10 05:41:08	15.15	17.61	20.79	1.11109		1.11109	-15.4434	-17.9511
2012-12-10 05:51:08	15.23	17.69	20.79	1.11804		1.11804	-15.525	-18.0326
2012-12-10 06:01:08	15.27	17.72	20.8	1.12498		1.12498	-15.5657	-18.0632
2012-12-10 06:11:08	15.35	17.8	20.8	1.13192		1.13192	-15.6473	-18.1448
2012-12-10 06:21:08	15.42	17.88	20.81	1.13887		1.13887	-15.7187	-18.2263
2012-12-10 06:31:08	15.44	17.9	20.82	1.14581	41253.3	1.14581	-15.739	-18.2467
2012-12-10 06:41:08	15.49	17.95	20.82	1.15276		1.15276	-15.79	-18.2977
2012-12-10 06:51:08	15.55	18	20.83	1.1597		1.1597	-15.8512	-18.3486
2012-12-10 07:01:08	15.61	18.06	20.84	1.16665		1.16665	-15.9123	-18.4098
2012-12-10 07:11:08	15.7	18.15	20.85	1.17359		1.17359	-16.0041	-18.5015
2012-12-10 07:21:08	15.68	18.13	20.85	1.18054		1.18054	-15.9837	-18.4811
2012-12-10 07:31:08	15.78	18.22	20.86	1.18748	41253.3	1.18748	-16.0856	-18.5729
2012-12-10 07:41:08	15.83	18.28	20.87	1.19442		1.19442	-16.1366	-18.634
2012-12-10 07:51:08	15.64	18.1	20.88	1.20137		1.20137	-15.9429	-18.4506
2012-12-10 08:01:08	15.74	18.2	20.88	1.20831		1.20831	-16.0449	-18.5525
2012-12-10 08:11:08	15.85	18.3	20.89	1.21526		1.21526	-16.157	-18.6544
2012-12-10 08:21:08	15.89	18.34	20.9	1.2222		1.2222	-16.1978	-18.6952
2012-12-10 08:31:08	15.95	18.39	20.91	1.22915	41253.4	1.22915	-16.2589	-18.7462
2012-12-10 08:41:08	15.97	18.42	20.93	1.23609		1.23609	-16.2793	-18.7768
2012-12-10 08:51:08	16.02	18.45	20.95	1.24304		1.24304	-16.3303	-18.8073
2012-12-10 09:01:08	16.02	18.46	20.97	1.24998		1.24998	-16.3303	-18.8175
2012-12-10 09:11:08	16.1	18.54	20.98	1.25692		1.25692	-16.4118	-18.8991
2012-12-10 09:21:08	16.15	18.59	21	1.26387		1.26387	-16.4628	-18.9501
2012-12-10 09:31:08	15.92	18.37	21.01	1.27081	41253.4	1.27081	-16.2283	-18.7258
2012-12-10 09:41:08	16.1	18.53	21.05	1.27776		1.27776	-16.4118	-18.8889
2012-12-10 09:51:08	16.16	18.59	21.07	1.2847		1.2847	-16.473	-18.9501
2012-12-10 10:01:08	16.23	18.66	21.08	1.29165		1.29165	-16.5443	-19.0214
2012-12-10 10:11:08	16.25	18.7	21.08	1.29859		1.29859	-16.5647	-19.0622
2012-12-10 10:21:08	16.34	18.77	21.08	1.30554		1.30554	-16.6565	-19.1335
2012-12-10 10:31:08	16.43	18.88	21.07	1.31248	41253.4	1.31248	-16.7482	-19.2457
2012-12-10 10:41:08	16.43	18.87	21.1	1.31942		1.31942	-16.7482	-19.2355
2012-12-10 10:51:08	16.46	18.88	21.14	1.32637		1.32637	-16.7788	-19.2457
2012-12-10 11:01:08	16.46	18.9	21.17	1.33331		1.33331	-16.7788	-19.2661
2012-12-10 11:11:08	16.51	18.93	21.18	1.34026		1.34026	-16.8298	-19.2966
2012-12-10 11:21:08	16.53	18.96	21.2	1.3472		1.3472	-16.8502	-19.3272
2012-12-10 11:31:08	16.62	19.04	21.21	1.35415	41253.5	1.35415	-16.9419	-19.4088
2012-12-10 11:41:08	16.66	19.1	21.23	1.36109		1.36109	-16.9827	-19.4699
2012-12-10 11:51:08	16.72	19.16	21.24	1.36804		1.36804	-17.0438	-19.5311
2012-12-10 12:01:08	16.76	19.18	21.26	1.37498		1.37498	-17.0846	-19.5515
2012-12-10 12:11:08	16.83	19.25	21.27	1.38192		1.38192	-17.156	-19.6228
2012-12-10 12:21:08	16.84	19.27	21.29	1.38887		1.38887	-17.1662	-19.6432
2012-12-10 12:31:08	16.87	19.29	21.3	1.39581	41253.5	1.39581	-17.1967	-19.6636
2012-12-10 12:41:08	16.91	19.34	21.31	1.40276		1.40276	-17.2375	-19.7146
2012-12-10 12:51:08	16.95	19.38	21.31	1.4097		1.4097	-17.2783	-19.7554
2012-12-10 13:01:08	17.04	19.44	21.31	1.41665		1.41665	-17.37	-19.8165
2012-12-10 13:08:40	17.07	19.49	21.29	1.42188		1.42188	-17.4006	-19.8675
2012-12-10 13:09:40	17.08	19.51	21.29	1.42258		1.42258	-17.4108	-19.8879
2012-12-10 13:10:40	17.07	19.48	21.29	1.42327	41253.5	1.42327	-17.4006	-19.8573
2012-12-10 13:11:40	17.05	19.52	21.29	1.42397		1.42397	-17.3802	-19.8981
2012-12-10 13:12:40	17.06	19.48	21.29	1.42466		1.42466	-17.3904	-19.8573
2012-12-10 13:13:40	17.04	19.47	21.29	1.42535		1.42535	-17.37	-19.8471
2012-12-10 13:14:40	17.04	19.47	21.29	1.42605		1.42605	-17.37	-19.8471
2012-12-10 13:15:40	17.06	19.5	21.29	1.42674		1.42674	-17.3904	-19.8777
2012-12-10 13:16:40	17.05	19.47	21.29	1.42744	41253.6	1.42744	-17.3802	-19.8471
2012-12-10 13:17:40	17.05	19.48	21.29	1.42813		1.42813	-17.3802	-19.8573
2012-12-10 13:18:40	17.05	19.45	21.29	1.42883		1.42883	-17.3802	-19.8267
2012-12-10 13:19:40	17.07	19.5	21.29	1.42952		1.42952	-17.4006	-19.8777
2012-12-10 13:20:40	17.02	19.43	21.29	1.43022		1.43022	-17.3496	-19.8063
2012-12-10 13:21:40	17.02	19.44	21.29	1.43091		1.43091	-17.3496	-19.8165
2012-12-10 13:22:40	17.02	19.45	21.29	1.4316	41253.6	1.4316	-17.3496	-19.8267
2012-12-10 13:23:40	17.05	19.46	21.29	1.4323		1.4323	-17.3802	-19.8369
2012-12-10 13:24:40	17.08	19.48	21.29	1.43299		1.43299	-17.4108	-19.8573
2012-12-10 13:25:40	17.04	19.46	21.29	1.43369		1.43369	-17.37	-19.8369
2012-12-10 13:26:40	17.05	19.47	21.3	1.43438		1.43438	-17.3802	-19.8471
2012-12-10 13:27:40	17.06	19.48	21.29	1.43508		1.43508	-17.3904	-19.8573
2012-12-10 13:28:40	17.06	19.48	21.3	1.43577	41253.6	1.43577	-17.3904	-19.8573
2012-12-10 13:29:40	17.08	19.5	21.3	1.43647		1.43647	-17.4108	-19.8777
2012-12-10 13:30:40	17.07	19.5	21.3	1.43716		1.43716	-17.4006	-19.8777
2012-12-10 13:31:40	17.09	19.51	21.3	1.43785		1.43785	-17.421	-19.8879
2012-12-10 13:32:40	17.09	19.52	21.3	1.43855		1.43855	-17.421	-19.8981
2012-12-10 13:33:40	17.09	19.51	21.3	1.43924		1.43924	-17.421	-19.8879
2012-12-10 13:34:40	17.11	19.53	21.3	1.43994	41253.6	1.43994	-17.4414	-19.9083
2012-12-10 13:35:40	17.1	19.52	21.3	1.44063		1.44063	-17.4312	-19.8981
2012-12-10 13:36:40	17.13	19.54	21.3	1.44133		1.44133	-17.4618	-19.9185
2012-12-10 13:37:40	17.11	19.53	21.3	1.44202		1.44202	-17.4414	-19.9083
2012-12-10 13:38:40	17.16	19.56	21.3	1.44272		1.44272	-17.4924	-19.9388
2012-12-10 13:39:40	17.15	19.58	21.3	1.44341		1.44341	-17.4822	-19.9592
2012-12-10 13:40:40	17.15	19.57	21.3	1.4441	41253.6	1.4441	-17.4822	-19.949
2012-12-10 13:41:40	17.15	19.58	21.3	1.4448		1.4448	-17.4822	-19.9592
2012-12-10 13:42:40	17.14	19.57	21.31	1.44549		1.44549	-17.472	-19.949
2012-12-10 13:43:40	17.16	19.56	21.31	1.44619		1.44619	-17.4924	-19.9388
2012-12-10 13:44:40	17.14	19.57	21.31	1.44688		1.44688	-17.472	-19.949
2012-12-10 13:45:40	17.16	19.58	21.31	1.44758		1.44758	-17.4924	-19.9592
2012-12-10 13:46:40	17.17	19.61	21.31	1.44827	41253.6	1.44827	-17.5025	-19.9898
2012-12-10 13:47:40	17.15	19.59	21.31	1.44897		1.44897	-17.4822	-19.9694
2012-12-10 13:48:40	17.17	19.58	21.31	1.44966		1.44966	-17.5025	-19.9592
2012-12-10 13:49:40	17.19	19.6	21.31	1.45035		1.45035	-17.5229	-19.9796
2012-12-10 13:50:40	17.2	19.62	21.31	1.45105		1.45105	-17.5331	-20
2012-12-10 13:51:40	17.19	19.62	21.31	1.45174		1.45174	-17.5229	-20
2012-12-10 13:52:40	17.18	19.61	21.31	1.45244	41253.6	1.45244	-17.5127	-19.9898
2012-12-10 13:53:40	17.19	19.61	21.31	1.45313		1.45313	-17.5229	-19.9898
2012-12-10 13:54:40	17.21	19.63	21.31	1.45383		1.45383	-17.5433	-20.0102
2012-12-10 13:55:40	17.22	19.63	21.31	1.45452		1.45452	-17.5535	-20.0102
2012-12-10 13:56:40	17.21	19.6	21.31	1.45522		1.45522	-17.5433	-19.9796
2012-12-10 13:57:40	17.2	19.6	21.31	1.45591		1.45591	-17.5331	-19.9796
2012-12-10 13:58:40	17.24	19.66	21.31	1.4566	41253.6	1.4566	-17.5739	-20.0408
2012-12-10 13:59:40	17.21	19.66	21.31	1.4573		1.4573	-17.5433	-20.0408
2012-12-10 14:00:40	17.21	19.65	21.31	1.45799		1.45799	-17.5433	-20.0306
2012-12-10 14:01:40	17.23	19.65	21.32	1.45869		1.45869	-17.5637	-20.0306
2012-12-10 14:02:40	17.25	19.66	21.32	1.45938		1.45938	-17.5841	-20.0408
2012-12-10 14:03:40	17.26	19.67	21.32	1.46008		1.46008	-17.5943	-20.051
2012-12-10 14:04:40	17.25	19.67	21.32	1.46077	41253.6	1.46077	-17.5841	-20.051
2012-12-10 14:05:40	17.17	19.6	21.32	1.46147		1.46147	-17.5025	-19.9796
2012-12-10 14:06:40	17.21	19.63	21.32	1.46216		1.46216	-17.5433	-20.0102
2012-12-10 14:07:40	17.23	19.64	21.32	1.46285		1.46285	-17.5637	-20.0204
2012-12-10 14:08:40	17.23	19.65	21.32	1.46355		1.46355	-17.5637	-20.0306
2012-12-10 14:18:40	17.28	19.7	21.32	1.47049		1.47049	-17.6147	-20.0815
2012-12-10 14:28:40	17.34	19.76	21.31	1.47744	41253.6	1.47744	-17.6758	-20.1427
2012-12-10 14:38:40	17.38	19.81	21.31	1.48438		1.48438	-17.7166	-20.1937
2012-12-10 14:48:40	17.44	19.86	21.3	1.49133		1.49133	-17.7778	-20.2446
2012-12-10 14:58:40	17.39	19.81	21.29	1.49827		1.49827	-17.7268	-20.1937
2012-12-10 15:08:40	17.5	19.93	21.29	1.50522		1.50522	-17.8389	-20.316
2012-12-10 15:18:40	17.51	19.93	21.28	1.51216		1.51216	-17.8491	-20.316
2012-12-10 15:28:40	17.58	19.98	21.27	1.5191	41253.6	1.5191	-17.9205	-20.367
2012-12-10 15:38:40	17.58	20.03	21.26	1.52605		1.52605	-17.9205	-20.4179
2012-12-10 15:48:40	17.65	20.08	21.25	1.53299		1.53299	-17.9918	-20.4689
2012-12-10 15:58:40	17.68	20.1	21.24	1.53994		1.53994	-18.0224	-20.4893
2012-12-10 16:08:40	17.72	20.16	21.23	1.54688		1.54688	-18.0632	-20.5505
2012-12-10 16:18:40	17.41	19.85	21.22	1.55383		1.55383	-17.7472	-20.2345
2012-12-10 16:28:40	17.66	20.11	21.22	1.56077	41253.7	1.56077	-18.002	-20.4995
2012-12-10 16:38:40	17.79	20.22	21.21	1.56772		1.56772	-18.1346	-20.6116
2012-12-10 16:48:40	17.78	20.22	21.2	1.57466		1.57466	-18.1244	-20.6116
2012-12-10 16:58:40	17.88	20.32	21.19	1.5816		1.5816	-18.2263	-20.7136
2012-12-10 17:08:40	17.86	20.3	21.18	1.58855		1.58855	-18.2059	-20.6932
2012-12-10 17:18:40	17.95	20.38	21.17	1.59549		1.59549	-18.2977	-20.7747
2012-12-10 17:28:40	17.95	20.39	21.16	1.60244	41253.7	1.60244	-18.2977	-20.7849
2012-12-10 17:38:40	18	20.46	21.15	1.60938		1.60938	-18.3486	-20.8563
2012-12-10 17:48:40	17.09	19.57	21.13	1.61633		1.61633	-17.421	-19.949
2012-12-10 17:58:40	17.32	19.8	21.14	1.62327		1.62327	-17.6555	-20.1835
2012-12-10 18:08:40	17.52	20.02	21.14	1.63022		1.63022	-17.8593	-20.4077
2012-12-10 18:18:40	17.7	20.18	21.13	1.63716		1.63716	-18.0428	-20.5708
2012-12-10 18:28:40	17.84	20.33	21.13	1.6441	41253.8	1.6441	-18.1855	-20.7238
2012-12-10 18:38:40	17.96	20.45	21.12	1.65105		1.65105	-18.3078	-20.8461
2012-12-10 18:48:40	18.05	20.54	21.11	1.65799		1.65799	-18.3996	-20.9378
2012-12-10 18:58:40	18.08	20.57	21.09	1.66494		1.66494	-18.4302	-20.9684
2012-12-10 19:08:40	18.18	20.66	21.08	1.67188		1.67188	-18.5321	-21.0601
2012-12-10 19:18:40	18.24	20.74	21.07	1.67883		1.67883	-18.5933	-21.1417
2012-12-10 19:28:40	18.29	20.78	21.06	1.68577	41253.8	1.68577	-18.6442	-21.1825
2012-12-10 19:38:40	18.37	20.86	21.04	1.69272		1.69272	-18.7258	-21.264
2012-12-10 19:48:40	18.41	20.89	21.03	1.69966		1.69966	-18.7666	-21.2946
2012-12-10 19:58:40	18.47	20.96	21.01	1.7066		1.7066	-18.8277	-21.366
2012-12-10 20:08:40	18.48	20.98	21	1.71355		1.71355	-18.8379	-21.3863
2012-12-10 20:18:40	18.48	20.97	20.99	1.72049		1.72049	-18.8379	-21.3761
2012-12-10 20:28:40	18.61	21.1	20.97	1.72744	41253.9	1.72744	-18.9704	-21.5087
2012-12-10 20:38:40	18.46	20.95	20.96	1.73438		1.73438	-18.8175	-21.3558
2012-12-10 20:48:40	18.61	21.12	20.95	1.74133		1.74133	-18.9704	-21.5291
2012-12-10 20:58:40	18.66	21.16	20.94	1.74827		1.74827	-19.0214	-21.5698
2012-12-10 21:08:40	18.72	21.24	20.92	1.75522		1.75522	-19.0826	-21.6514
2012-12-10 21:18:40	18.77	21.28	20.91	1.76216		1.76216	-19.1335	-21.6922
2012-12-10 21:28:40	18.83	21.34	20.9	1.7691	41253.9	1.7691	-19.1947	-21.7533
2012-12-10 21:38:40	18.88	21.38	20.88	1.77605		1.77605	-19.2457	-21.7941
2012-12-10 21:48:40	18.92	21.43	20.87	1.78299		1.78299	-19.2864	-21.8451
2012-12-10 21:58:40	18.95	21.45	20.86	1.78994		1.78994	-19.317	-21.8654
2012-12-10 22:08:40	18.98	21.5	20.85	1.79688		1.79688	-19.3476	-21.9164
2012-12-10 22:18:40	19.03	21.55	20.84	1.80383		1.80383	-19.3986	-21.9674
2012-12-10 22:28:40	19.09	21.61	20.83	1.81077	41253.9	1.81077	-19.4597	-22.0285
2012-12-10 22:38:40	19.16	21.66	20.82	1.81772		1.81772	-19.5311	-22.0795
2012-12-10 22:48:40	19.22	21.72	20.81	1.82466		1.82466	-19.5923	-22.1407
2012-12-10 22:58:40	19.26	21.78	20.8	1.8316		1.8316	-19.633	-22.2018
2012-12-10 23:08:40	19.29	21.82	20.79	1.83855		1.83855	-19.6636	-22.2426
2012-12-10 23:18:40	19.33	21.8	20.78	1.84549		1.84549	-19.7044	-22.2222
2012-12-10 23:28:40	19.38	21.85	20.81	1.85244	41254	1.85244	-19.7554	-22.2732
2012-12-10 23:38:40	19.43	21.9	20.82	1.85938		1.85938	-19.8063	-22.3242
2012-12-10 23:48:40	19.44	21.93	20.83	1.86633		1.86633	-19.8165	-22.3547
2012-12-10 23:58:40	19.47	21.94	20.84	1.87327		1.87327	-19.8471	-22.3649
2012-12-11 00:08:40	19.54	22	20.85	1.88022		1.88022	-19.9185	-22.4261
2012-12-11 00:18:40	19.58	22.05	20.86	1.88716		1.88716	-19.9592	-22.4771
2012-12-11 00:28:40	19.58	22.04	20.86	1.8941	41254	1.8941	-19.9592	-22.4669
2012-12-11 00:38:40	19.68	22.14	20.86	1.90105		1.90105	-20.0612	-22.5688
2012-12-11 00:48:40	19.58	22.04	20.86	1.90799		1.90799	-19.9592	-22.4669
2012-12-11 00:58:40	19.67	22.14	20.86	1.91494		1.91494	-20.051	-22.5688
2012-12-11 01:08:40	19.74	22.2	20.86	1.92188		1.92188	-20.1223	-22.63
2012-12-11 01:18:40	19.73	22.18	20.86	1.92883		1.92883	-20.1121	-22.6096
2012-12-11 01:28:40	19.77	22.23	20.85	1.93577	41254.1	1.93577	-20.1529	-22.6606
2012-12-11 01:38:40	19.82	22.27	20.85	1.94272		1.94272	-20.2039	-22.7013
2012-12-11 01:48:40	19.87	22.32	20.84	1.94966		1.94966	-20.2548	-22.7523
2012-12-11 01:58:40	19.93	22.39	20.84	1.9566		1.9566	-20.316	-22.8236
2012-12-11 02:08:40	19.97	22.43	20.83	1.96355		1.96355	-20.3568	-22.8644
2012-12-11 02:18:40	20.03	22.49	20.83	1.97049		1.97049	-20.4179	-22.9256
2012-12-11 02:28:40	20.05	22.51	20.82	1.97744	41254.1	1.97744	-20.4383	-22.946
2012-12-11 02:38:40	20.09	22.54	20.81	1.98438		1.98438	-20.4791	-22.9766
2012-12-11 02:48:40	20.14	22.59	20.81	1.99133		1.99133	-20.5301	-23.0275
2012-12-11 02:58:40	20.17	22.63	20.8	1.99827		1.99827	-20.5607	-23.0683
2012-12-11 03:08:40	20.22	22.67	20.79	2.00522		2.00522	-20.6116	-23.1091
2012-12-11 03:18:40	20.26	22.74	20.79	2.01216		2.01216	-20.6524	-23.1804
2012-12-11 03:28:40	20.29	22.76	20.78	2.0191	41254.1	2.0191	-20.683	-23.2008
2012-12-11 03:38:40	20.35	22.8	20.78	2.02605		2.02605	-20.7441	-23.2416
2012-12-11 03:48:40	20.39	22.86	20.77	2.03299		2.03299	-20.7849	-23.3028
2012-12-11 03:58:40	20.3	22.75	20.76	2.03994		2.03994	-20.6932	-23.1906
2012-12-11 04:08:40	20.41	22.86	20.76	2.04688		2.04688	-20.8053	-23.3028
2012-12-11 04:18:40	20.45	22.91	20.75	2.05383		2.05383	-20.8461	-23.3537
2012-12-11 04:28:40	20.49	22.95	20.75	2.06077	41254.2	2.06077	-20.8869	-23.3945
2012-12-11 04:38:40	20.49	22.96	20.74	2.06772		2.06772	-20.8869	-23.4047
2012-12-11 04:48:40	20.47	22.92	20.74	2.07466		2.07466	-20.8665	-23.3639
2012-12-11 04:58:40	20.53	22.99	20.73	2.0816		2.0816	-20.9276	-23.4353
2012-12-11 05:08:40	20.59	23.05	20.73	2.08855		2.08855	-20.9888	-23.4964
2012-12-11 05:18:40	20.61	23.08	20.73	2.09549		2.09549	-21.0092	-23.527
2012-12-11 05:28:40	20.67	23.14	20.72	2.10244	41254.2	2.10244	-21.0703	-23.5882
2012-12-11 05:38:40	20.74	23.2	20.72	2.10938		2.10938	-21.1417	-23.6493
2012-12-11 05:48:40	20.68	23.13	20.72	2.11633		2.11633	-21.0805	-23.578
2012-12-11 05:58:40	20.76	23.24	20.71	2.12327		2.12327	-21.1621	-23.6901
2012-12-11 06:08:40	20.8	23.26	20.71	2.13022		2.13022	-21.2029	-23.7105
2012-12-11 06:18:40	20.84	23.31	20.7	2.13716		2.13716	-21.2436	-23.7615
2012-12-11 06:28:40	20.86	23.32	20.7	2.1441	41254.3	2.1441	-21.264	-23.7717
2012-12-11 06:38:40	20.79	23.26	20.69	2.15105		2.15105	-21.1927	-23.7105
2012-12-11 06:48:40	20.9	23.36	20.69	2.15799		2.15799	-21.3048	-23.8124
2012-12-11 06:58:40	20.92	23.38	20.69	2.16494		2.16494	-21.3252	-23.8328
2012-12-11 07:08:40	20.95	23.43	20.69	2.17188		2.17188	-21.3558	-23.8838
2012-12-11 07:18:40	20.99	23.45	20.69	2.17883		2.17883	-21.3965	-23.9042
2012-12-11 07:28:40	21.08	23.55	20.68	2.18577	41254.3	2.18577	-21.4883	-24.0061
2012-12-11 07:38:40	21.09	23.56	20.68	2.19272		2.19272	-21.4985	-24.0163
2012-12-11 07:48:40	21.09	23.57	20.67	2.19966		2.19966	-21.4985	-24.0265
2012-12-11 07:58:40	21.11	23.57	20.67	2.2066		2.2066	-21.5189	-24.0265
2012-12-11 08:08:40	21.13	23.58	20.66	2.21355		2.21355	-21.5392	-24.0367
2012-12-11 08:18:40	21.23	23.71	20.66	2.22049		2.22049	-21.6412	-24.1692
2012-12-11 08:28:40	21.27	23.74	20.65	2.22744	41254.4	2.22744	-21.682	-24.1998
2012-12-11 08:38:40	21.31	23.79	20.65	2.23438		2.23438	-21.7227	-24.2508
2012-12-11 08:48:40	21.33	23.79	20.65	2.24133		2.24133	-21.7431	-24.2508
2012-12-11 08:58:40	21.38	23.85	20.66	2.24827		2.24827	-21.7941	-24.3119
2012-12-11 09:08:40	21.4	23.88	20.66	2.25522		2.25522	-21.8145	-24.3425
2012-12-11 09:18:40	21.45	23.93	20.66	2.26216		2.26216	-21.8654	-24.3935
2012-12-11 09:28:40	21.48	23.95	20.67	2.2691	41254.4	2.2691	-21.896	-24.4139
2012-12-11 09:38:40	21.49	23.99	20.67	2.27605		2.27605	-21.9062	-24.4546
2012-12-11 09:48:40	21.5	23.97	20.67	2.28299		2.28299	-21.9164	-24.4343
2012-12-11 09:58:40	21.55	24.02	20.67	2.28994		2.28994	-21.9674	-24.4852
2012-12-11 10:08:40	21.61	24.09	20.67	2.29688		2.29688	-22.0285	-24.5566
2012-12-11 10:18:40	21.54	24.01	20.68	2.30383		2.30383	-21.9572	-24.475
2012-12-11 10:28:40	21.63	24.1	20.68	2.31077	41254.4	2.31077	-22.0489	-24.5668
2012-12-11 10:38:40	21.66	24.14	20.68	2.31772		2.31772	-22.0795	-24.6075
2012-12-11 10:48:40	21.73	24.2	20.68	2.32466		2.32466	-22.1509	-24.6687
2012-12-11 10:58:40	21.77	24.24	20.67	2.3316		2.3316	-22.1916	-24.7095
2012-12-11 11:08:40	21.82	24.3	20.67	2.33855		2.33855	-22.2426	-24.7706
2012-12-11 11:18:40	21.68	24.14	20.66	2.34549		2.34549	-22.0999	-24.6075
2012-12-11 11:28:40	21.8	24.27	20.66	2.35244	41254.5	2.35244	-22.2222	-24.7401
2012-12-11 11:38:40	21.86	24.32	20.65	2.35938		2.35938	-22.2834	-24.791
2012-12-11 11:48:40	21.87	24.35	20.65	2.36633		2.36633	-22.2936	-24.8216
2012-12-11 11:58:40	21.19	23.68	20.64	2.37327		2.37327	-21.6004	-24.1386
2012-12-11 12:08:40	21.44	23.94	20.66	2.38022		2.38022	-21.8552	-24.4037
2012-12-11 12:18:40	21.71	24.15	20.68	2.38716		2.38716	-22.1305	-24.6177
2012-12-11 12:28:40	21.84	24.31	20.68	2.3941	41254.5	2.3941	-22.263	-24.7808
2012-12-11 12:38:40	21.9	24.37	20.69	2.40105		2.40105	-22.3242	-24.842
2012-12-11 12:48:40	21.96	24.42	20.68	2.40799		2.40799	-22.3853	-24.893
2012-12-11 12:58:40	22	24.47	20.68	2.41494		2.41494	-22.4261	-24.9439
2012-12-11 13:08:40	22.06	24.53	20.68	2.42188		2.42188	-22.4873	-25.0051
2012-12-11 13:18:40	22.07	24.54	20.68	2.42883		2.42883	-22.4975	-25.0153
2012-12-11 13:28:40	22.14	24.62	20.67	2.43577	41254.6	2.43577	-22.5688	-25.0968
2012-12-11 13:38:40	22.16	24.63	20.67	2.44272		2.44272	-22.5892	-25.107
2012-12-11 13:48:40	22.2	24.69	20.66	2.44966		2.44966	-22.63	-25.1682
2012-12-11 13:58:40	22.28	24.73	20.65	2.4566		2.4566	-22.7115	-25.209
2012-12-11 14:08:40	22.33	24.8	20.65	2.46355		2.46355	-22.7625	-25.2803
2012-12-11 14:18:40	22.36	24.83	20.64	2.47049		2.47049	-22.7931	-25.3109
2012-12-11 14:28:40	22.41	24.87	20.64	2.47744	41254.6	2.47744	-22.844	-25.3517
2012-12-11 14:38:40	22.45	24.92	20.64	2.48438		2.48438	-22.8848	-25.4027
2012-12-11 14:48:40	22.46	24.93	20.63	2.49133		2.49133	-22.895	-25.4128
2012-12-11 14:58:40	22.53	24.99	20.63	2.49827		2.49827	-22.9664	-25.474
2012-12-11 15:08:40	22.51	24.98	20.63	2.50522		2.50522	-22.946	-25.4638
2012-12-11 15:18:40	22.59	25.06	20.62	2.51216		2.51216	-23.0275	-25.5454
2012-12-11 15:28:40	22.63	25.11	20.62	2.5191	41254.6	2.5191	-23.0683	-25.5963
2012-12-11 15:38:40	22.62	25.1	20.62	2.52605		2.52605	-23.0581	-25.5861
2012-12-11 15:48:40	22.67	25.13	20.61	2.53299		2.53299	-23.1091	-25.6167
2012-12-11 15:58:40	22.72	25.18	20.61	2.53994		2.53994	-23.16	-25.6677
2012-12-11 16:08:40	22.79	25.27	20.6	2.54688		2.54688	-23.2314	-25.7594
2012-12-11 16:18:40	22.8	25.26	20.59	2.55383		2.55383	-23.2416	-25.7492
2012-12-11 16:28:40	22.85	25.32	20.59	2.56077	41254.7	2.56077	-23.2926	-25.8104
2012-12-11 16:38:40	22.9	25.37	20.58	2.56772		2.56772	-23.3435	-25.8614
2012-12-11 16:48:40	22.93	25.41	20.58	2.57466		2.57466	-23.3741	-25.9021
2012-12-11 16:58:40	22.97	25.46	20.58	2.5816		2.5816	-23.4149	-25.9531
2012-12-11 17:08:40	22.48	24.99	20.58	2.58855		2.58855	-22.9154	-25.474
2012-12-11 17:18:40	22.38	24.86	20.61	2.59549		2.59549	-22.8135	-25.3415
2012-12-11 17:28:40	22.61	25.1	20.68	2.60244	41254.7	2.60244	-23.0479	-25.5861
2012-12-11 17:38:40	22.77	25.26	20.71	2.60938		2.60938	-23.211	-25.7492
2012-12-11 17:48:40	22.87	25.35	20.77	2.61633		2.61633	-23.3129	-25.841
2012-12-11 17:58:40	22.91	25.37	20.81	2.62327		2.62327	-23.3537	-25.8614
2012-12-11 18:08:40	22.93	25.44	20.83	2.63022		2.63022	-23.3741	-25.9327
2012-12-11 18:18:40	23.01	25.49	20.84	2.63716		2.63716	-23.4557	-25.9837
2012-12-11 18:28:40	23.06	25.54	20.85	2.6441	41254.8	2.6441	-23.5066	-26.0347
2012-12-11 18:38:40	23.1	25.59	20.85	2.65105		2.65105	-23.5474	-26.0856
2012-12-11 18:48:40	23.01	25.49	20.85	2.65799		2.65799	-23.4557	-25.9837
2012-12-11 18:58:40	23.19	25.66	20.85	2.66494		2.66494	-23.6391	-26.157
2012-12-11 19:08:40	23.23	25.69	20.84	2.67188		2.67188	-23.6799	-26.1876
2012-12-11 19:18:40	23.26	25.72	20.82	2.67883		2.67883	-23.7105	-26.2181
2012-12-11 19:28:40	23.34	25.81	20.81	2.68577	41254.8	2.68577	-23.792	-26.3099
2012-12-11 19:38:40	23.41	25.87	20.8	2.69272		2.69272	-23.8634	-26.371
2012-12-11 19:48:40	23.31	25.81	20.79	2.69966		2.69966	-23.7615	-26.3099
2012-12-11 19:58:40	23.39	25.8	20.78	2.7066		2.7066	-23.843	-26.2997
2012-12-11 20:08:40	23.42	25.9	20.77	2.71355		2.71355	-23.8736	-26.4016
2012-12-11 20:18:40	23.47	25.96	20.75	2.72049		2.72049	-23.9246	-26.4628
2012-12-11 20:28:40	23.33	25.78	20.74	2.72744	41254.9	2.72744	-23.7819	-26.2793
2012-12-11 20:38:40	23.37	25.79	20.72	2.73438		2.73438	-23.8226	-26.2895
2012-12-11 20:48:40	23.16	25.59	20.71	2.74133		2.74133	-23.6086	-26.0856
2012-12-11 20:58:40	23.38	25.82	20.69	2.74827		2.74827	-23.8328	-26.3201
2012-12-11 21:08:40	23.41	25.85	20.67	2.75522		2.75522	-23.8634	-26.3507
2012-12-11 21:18:40	23.47	25.9	20.66	2.76216		2.76216	-23.9246	-26.4016
2012-12-11 21:28:40	23.5	25.94	20.64	2.7691	41254.9	2.7691	-23.9551	-26.4424
2012-12-11 21:38:40	23.53	25.98	20.63	2.77605		2.77605	-23.9857	-26.4832
2012-12-11 21:48:40	23.57	26.02	20.61	2.78299		2.78299	-24.0265	-26.524
2012-12-11 21:58:40	23.6	26.06	20.6	2.78994		2.78994	-24.0571	-26.5647
2012-12-11 22:08:40	23.66	26.11	20.59	2.79688		2.79688	-24.1182	-26.6157
2012-12-11 22:18:40	23.71	26.16	20.57	2.80383		2.80383	-24.1692	-26.6667
2012-12-11 22:28:40	23.75	26.2	20.56	2.81077	41254.9	2.81077	-24.21	-26.7074
2012-12-11 22:38:40	23.81	26.26	20.55	2.81772		2.81772	-24.2712	-26.7686
2012-12-11 22:48:40	23.55	26	20.54	2.82466		2.82466	-24.0061	-26.5036
2012-12-11 22:58:40	23.78	26.23	20.53	2.8316		2.8316	-24.2406	-26.738
2012-12-11 23:08:40	23.85	26.31	20.52	2.83855		2.83855	-24.3119	-26.8196
2012-12-11 23:18:40	23.85	26.3	20.52	2.84549		2.84549	-24.3119	-26.8094
2012-12-11 23:28:40	23.92	26.37	20.51	2.85244	41255	2.85244	-24.3833	-26.8807
2012-12-11 23:38:40	23.85	26.3	20.5	2.85938		2.85938	-24.3119	-26.8094
2012-12-11 23:48:40	23.95	26.41	20.49	2.86633		2.86633	-24.4139	-26.9215
2012-12-11 23:58:40	24	26.46	20.49	2.87327		2.87327	-24.4648	-26.9725
2012-12-12 00:08:40	24.04	26.5	20.48	2.88022		2.88022	-24.5056	-27.0133
2012-12-12 00:18:40	24.09	26.55	20.48	2.88716		2.88716	-24.5566	-27.0642
2012-12-12 00:28:40	24.1	26.58	20.47	2.8941	41255	2.8941	-24.5668	-27.0948
2012-12-12 00:38:40	24.12	26.58	20.46	2.90105		2.90105	-24.5872	-27.0948
2012-12-12 00:48:40	24.16	26.63	20.46	2.90799		2.90799	-24.6279	-27.1458
2012-12-12 00:58:40	24.24	26.68	20.45	2.91494		2.91494	-24.7095	-27.1967
2012-12-12 01:08:40	24.2	26.67	20.45	2.92188		2.92188	-24.6687	-27.1865
2012-12-12 01:18:40	24.27	26.73	20.44	2.92883		2.92883	-24.7401	-27.2477
2012-12-12 01:28:40	24.29	26.75	20.44	2.93577	41255.1	2.93577	-24.7604	-27.2681
2012-12-12 01:38:40	24.35	26.8	20.44	2.94272		2.94272	-24.8216	-27.3191
2012-12-12 01:48:40	24.39	26.86	20.43	2.94966		2.94966	-24.8624	-27.3802
2012-12-12 01:58:40	24.43	26.89	20.43	2.9566		2.9566	-24.9032	-27.4108
2012-12-12 02:08:40	24.49	26.94	20.43	2.96355		2.96355	-24.9643	-27.4618
2012-12-12 02:18:40	24.51	26.97	20.42	2.97049		2.97049	-24.9847	-27.4924
2012-12-12 02:28:40	24.51	26.97	20.42	2.97744	41255.1	2.97744	-24.9847	-27.4924
2012-12-12 02:38:40	24.49	26.96	20.42	2.98438		2.98438	-24.9643	-27.4822
2012-12-12 02:48:40	24.55	27.03	20.41	2.99133		2.99133	-25.0255	-27.5535
2012-12-12 02:58:40	24.61	27.09	20.41	2.99827		2.99827	-25.0866	-27.6147
2012-12-12 03:08:40	24.65	27.13	20.41	3.00522		3.00522	-25.1274	-27.6555
2012-12-12 03:18:40	24.69	27.16	20.41	3.01216		3.01216	-25.1682	-27.686
2012-12-12 03:28:40	24.66	27.13	20.4	3.0191	41255.1	3.0191	-25.1376	-27.6555
2012-12-12 03:38:40	24.75	27.22	20.4	3.02605		3.02605	-25.2294	-27.7472
2012-12-12 03:48:40	24.8	27.27	20.4	3.03299		3.03299	-25.2803	-27.7982
2012-12-12 03:58:40	24.83	27.3	20.4	3.03994		3.03994	-25.3109	-27.8287
2012-12-12 04:08:40	24.88	27.36	20.4	3.04688		3.04688	-25.3619	-27.8899
2012-12-12 04:18:40	24.92	27.39	20.4	3.05383		3.05383	-25.4027	-27.9205
2012-12-12 04:28:40	24.96	27.42	20.4	3.06077	41255.2	3.06077	-25.4434	-27.9511
2012-12-12 04:38:40	25	27.46	20.4	3.06772		3.06772	-25.4842	-27.9918
2012-12-12 04:48:40	25.03	27.51	20.4	3.07466		3.07466	-25.5148	-28.0428
2012-12-12 04:58:40	25.05	27.52	20.4	3.0816		3.0816	-25.5352	-28.053
2012-12-12 05:08:40	25.09	27.57	20.4	3.08855		3.08855	-25.5759	-28.104
2012-12-12 05:18:40	25.13	27.61	20.4	3.09549		3.09549	-25.6167	-28.1448
2012-12-12 05:28:40	25.15	27.61	20.4	3.10244	41255.2	3.10244	-25.6371	-28.1448
2012-12-12 05:38:40	25.22	27.68	20.4	3.10938		3.10938	-25.7085	-28.2161
2012-12-12 05:48:40	25.25	27.72	20.4	3.11633		3.11633	-25.739	-28.2569
2012-12-12 05:58:40	25.29	27.76	20.4	3.12327		3.12327	-25.7798	-28.2977
2012-12-12 06:08:40	25.3	27.77	20.4	3.13022		3.13022	-25.79	-28.3078
2012-12-12 06:18:40	25.33	27.8	20.4	3.13716		3.13716	-25.8206	-28.3384
2012-12-12 06:28:40	25.25	27.71	20.4	3.1441	41255.3	3.1441	-25.739	-28.2467
2012-12-12 06:38:40	25.36	27.83	20.4	3.15105		3.15105	-25.8512	-28.369
2012-12-12 06:48:40	25.38	27.85	20.4	3.15799		3.15799	-25.8716	-28.3894
2012-12-12 06:58:40	25.42	27.89	20.4	3.16494		3.16494	-25.9123	-28.4302
2012-12-12 07:08:40	25.44	27.9	20.4	3.17188		3.17188	-25.9327	-28.4404
2012-12-12 07:18:40	25.44	27.91	20.41	3.17883		3.17883	-25.9327	-28.4506
2012-12-12 07:28:40	25.47	27.94	20.41	3.18577	41255.3	3.18577	-25.9633	-28.4811
2012-12-12 07:38:40	25.54	27.99	20.41	3.19272		3.19272	-26.0347	-28.5321
2012-12-12 07:48:40	25.57	28.04	20.42	3.19966		3.19966	-26.0652	-28.5831
2012-12-12 07:58:40	25.61	28.08	20.42	3.2066		3.2066	-26.106	-28.6239
2012-12-12 08:08:40	25.64	28.12	20.43	3.21355		3.21355	-26.1366	-28.6646
2012-12-12 08:18:40	25.69	28.14	20.44	3.22049		3.22049	-26.1876	-28.685
2012-12-12 08:28:40	25.58	28.05	20.45	3.22744	41255.4	3.22744	-26.0754	-28.5933
2012-12-12 08:38:40	25.66	28.14	20.47	3.23438		3.23438	-26.157	-28.685
2012-12-12 08:48:40	25.71	28.18	20.49	3.24133		3.24133	-26.208	-28.7258
2012-12-12 08:58:40	25.75	28.21	20.51	3.24827		3.24827	-26.2487	-28.7564
2012-12-12 09:08:40	25.76	28.23	20.52	3.25522		3.25522	-26.2589	-28.7768
2012-12-12 09:18:40	25.83	28.28	20.53	3.26216		3.26216	-26.3303	-28.8277
2012-12-12 09:28:40	25.24	27.74	20.54	3.2691	41255.4	3.2691	-25.7288	-28.2773
2012-12-12 09:38:40	25.55	28.05	20.58	3.27605		3.27605	-26.0449	-28.5933
2012-12-12 09:48:40	25.78	28.26	20.6	3.28299		3.28299	-26.2793	-28.8073
2012-12-12 09:58:40	25.9	28.41	20.62	3.28994		3.28994	-26.4016	-28.9602
2012-12-12 10:08:40	25.95	28.45	20.63	3.29688		3.29688	-26.4526	-29.001
2012-12-12 10:18:40	26	28.5	20.64	3.30383		3.30383	-26.5036	-29.052
2012-12-12 10:28:40	26.02	28.53	20.65	3.31077	41255.4	3.31077	-26.524	-29.0826
2012-12-12 10:38:40	26.08	28.57	20.66	3.31772		3.31772	-26.5851	-29.1233
2012-12-12 10:48:40	26.12	28.61	20.67	3.32466		3.32466	-26.6259	-29.1641
2012-12-12 10:58:40	26.16	28.65	20.69	3.3316		3.3316	-26.6667	-29.2049
2012-12-12 11:08:40	26.18	28.67	20.71	3.33855		3.33855	-26.6871	-29.2253
2012-12-12 11:18:40	26.22	28.71	20.73	3.34549		3.34549	-26.7278	-29.2661
2012-12-12 11:28:40	26.24	28.72	20.76	3.35244	41255.5	3.35244	-26.7482	-29.2762
2012-12-12 11:38:40	26.26	28.75	20.79	3.35938		3.35938	-26.7686	-29.3068
2012-12-12 11:48:40	26.21	28.68	20.81	3.36633		3.36633	-26.7176	-29.2355
2012-12-12 11:58:40	26.28	28.75	20.83	3.37327		3.37327	-26.789	-29.3068
2012-12-12 12:08:40	26.32	28.8	20.85	3.38022		3.38022	-26.8298	-29.3578
2012-12-12 12:18:40	26.33	28.8	20.86	3.38716		3.38716	-26.84	-29.3578
2012-12-12 12:28:40	26.39	28.86	20.87	3.3941	41255.5	3.3941	-26.9011	-29.419
2012-12-12 12:38:40	26.4	28.88	20.88	3.40105		3.40105	-26.9113	-29.4393
2012-12-12 12:48:40	26.46	28.92	20.88	3.40799		3.40799	-26.9725	-29.4801
2012-12-12 12:58:40	26.48	28.95	20.89	3.41494		3.41494	-26.9929	-29.5107
2012-12-12 13:08:40	26.52	28.99	20.89	3.42188		3.42188	-27.0336	-29.5515
2012-12-12 13:18:40	26.55	29.02	20.89	3.42883		3.42883	-27.0642	-29.5821
2012-12-12 13:28:40	26.57	29.06	20.89	3.43577	41255.6	3.43577	-27.0846	-29.6228
2012-12-12 13:38:40	26.64	29.1	20.88	3.44272		3.44272	-27.156	-29.6636
2012-12-12 13:48:40	26.68	29.15	20.88	3.44966		3.44966	-27.1967	-29.7146
2012-12-12 13:58:40	26.71	29.18	20.88	3.4566		3.4566	-27.2273	-29.7452
2012-12-12 14:08:40	26.71	29.17	20.88	3.46355		3.46355	-27.2273	-29.735
2012-12-12 14:18:40	26.57	29.04	20.88	3.47049		3.47049	-27.0846	-29.6024
2012-12-12 14:28:40	26.7	29.17	20.88	3.47744	41255.6	3.47744	-27.2171	-29.735
2012-12-12 14:38:40	26.75	29.22	20.88	3.48438		3.48438	-27.2681	-29.7859
2012-12-12 14:48:40	26.79	29.26	20.88	3.49133		3.49133	-27.3089	-29.8267
2012-12-12 14:58:40	26.81	29.28	20.88	3.49827		3.49827	-27.3293	-29.8471
2012-12-12 15:08:40	26.85	29.3	20.89	3.50522		3.50522	-27.37	-29.8675
2012-12-12 15:18:40	26.87	29.34	20.9	3.51216		3.51216	-27.3904	-29.9083
2012-12-12 15:28:40	26.93	29.39	20.91	3.5191	41255.6	3.5191	-27.4516	-29.9592
2012-12-12 15:38:40	26.96	29.44	20.91	3.52605		3.52605	-27.4822	-30.0102
2012-12-12 15:48:40	26.99	29.47	20.92	3.53299		3.53299	-27.5127	-30.0408
2012-12-12 15:58:40	27.02	29.49	20.92	3.53994		3.53994	-27.5433	-30.0612
2012-12-12 16:08:40	27.06	29.52	20.92	3.54688		3.54688	-27.5841	-30.0917
2012-12-12 16:18:40	27.1	29.56	20.92	3.55383		3.55383	-27.6249	-30.1325
2012-12-12 16:28:40	27.12	29.59	20.92	3.56077	41255.7	3.56077	-27.6453	-30.1631
2012-12-12 16:38:40	27.15	29.61	20.92	3.56772		3.56772	-27.6758	-30.1835
2012-12-12 16:48:40	27.18	29.65	20.91	3.57466		3.57466	-27.7064	-30.2243
2012-12-12 16:58:40	27.19	29.66	20.91	3.5816		3.5816	-27.7166	-30.2345
2012-12-12 17:08:40	27.23	29.71	20.91	3.58855		3.58855	-27.7574	-30.2854
2012-12-12 17:18:40	27.27	29.74	20.91	3.59549		3.59549	-27.7982	-30.316
2012-12-12 17:28:40	27.3	29.77	20.91	3.60244	41255.7	3.60244	-27.8287	-30.3466
2012-12-12 17:38:40	27.19	29.65	20.91	3.60938		3.60938	-27.7166	-30.2243
2012-12-12 17:48:40	27.29	29.77	20.93	3.61633		3.61633	-27.8186	-30.3466
2012-12-12 17:58:40	27.36	29.83	20.93	3.62327		3.62327	-27.8899	-30.4077
2012-12-12 18:08:40	27.41	29.88	20.93	3.63022		3.63022	-27.9409	-30.4587
2012-12-12 18:18:40	27.44	29.91	20.93	3.63716		3.63716	-27.9715	-30.4893
2012-12-12 18:28:40	27.48	29.95	20.93	3.6441	41255.8	3.6441	-28.0122	-30.5301
2012-12-12 18:38:40	27.53	30.01	20.93	3.65105		3.65105	-28.0632	-30.5912
2012-12-12 18:48:40	27.57	30.05	20.93	3.65799		3.65799	-28.104	-30.632
2012-12-12 18:58:40	27.64	30.1	20.92	3.66494		3.66494	-28.1753	-30.683
2012-12-12 19:08:40	27.67	30.13	20.92	3.67188		3.67188	-28.2059	-30.7136
2012-12-12 19:18:40	27.72	30.19	20.92	3.67883		3.67883	-28.2569	-30.7747
2012-12-12 19:28:40	27.75	30.23	20.91	3.68577	41255.8	3.68577	-28.2875	-30.8155
2012-12-12 19:38:40	27.8	30.27	20.91	3.69272		3.69272	-28.3384	-30.8563
2012-12-12 19:48:40	27.82	30.29	20.9	3.69966		3.69966	-28.3588	-30.8767
2012-12-12 19:58:40	27.87	30.36	20.89	3.7066		3.7066	-28.4098	-30.948
2012-12-12 20:08:40	27.89	30.36	20.88	3.71355		3.71355	-28.4302	-30.948
2012-12-12 20:18:40	27.92	30.4	20.87	3.72049		3.72049	-28.4608	-30.9888
2012-12-12 20:28:40	27.96	30.44	20.87	3.72744	41255.9	3.72744	-28.5015	-31.0296
2012-12-12 20:38:40	28	30.48	20.86	3.73438		3.73438	-28.5423	-31.0703
2012-12-12 20:48:40	28.03	30.5	20.85	3.74133		3.74133	-28.5729	-31.0907
2012-12-12 20:58:40	28.05	30.54	20.84	3.74827		3.74827	-28.5933	-31.1315
2012-12-12 21:08:40	28.06	30.55	20.83	3.75522		3.75522	-28.6035	-31.1417
2012-12-12 21:18:40	28.11	30.58	20.82	3.76216		3.76216	-28.6544	-31.1723
2012-12-12 21:28:40	28.15	30.63	20.82	3.7691	41255.9	3.7691	-28.6952	-31.2232
2012-12-12 21:38:40	28.13	30.63	20.81	3.77605		3.77605	-28.6748	-31.2232
2012-12-12 21:48:40	28.2	30.7	20.8	3.78299		3.78299	-28.7462	-31.2946
2012-12-12 21:58:40	28.23	30.72	20.79	3.78994		3.78994	-28.7768	-31.315
2012-12-12 22:08:40	28.29	30.78	20.78	3.79688		3.79688	-28.8379	-31.3761
2012-12-12 22:18:40	28.32	30.8	20.78	3.80383		3.80383	-28.8685	-31.3965
2012-12-12 22:28:40	28.35	30.84	20.77	3.81077	41255.9	3.81077	-28.8991	-31.4373
2012-12-12 22:38:40	28.39	30.89	20.76	3.81772		3.81772	-28.9399	-31.4883
2012-12-12 22:48:40	28.39	30.88	20.76	3.82466		3.82466	-28.9399	-31.4781
2012-12-12 22:58:40	28.44	30.94	20.75	3.8316		3.8316	-28.9908	-31.5392
2012-12-12 23:08:40	28.45	30.94	20.74	3.83855		3.83855	-29.001	-31.5392
2012-12-12 23:18:40	28.45	30.94	20.74	3.84549		3.84549	-29.001	-31.5392
2012-12-12 23:28:40	28.51	31	20.73	3.85244	41256	3.85244	-29.0622	-31.6004
2012-12-12 23:38:40	28.58	31.06	20.73	3.85938		3.85938	-29.1335	-31.6616
2012-12-12 23:48:40	28.62	31.1	20.72	3.86633		3.86633	-29.1743	-31.7023
2012-12-12 23:58:40	28.63	31.13	20.72	3.87327		3.87327	-29.1845	-31.7329
2012-12-13 00:08:40	28.63	31.13	20.72	3.88022		3.88022	-29.1845	-31.7329
2012-12-13 00:18:40	28.7	31.2	20.71	3.88716		3.88716	-29.2559	-31.8043
2012-12-13 00:28:40	28.74	31.23	20.71	3.8941	41256	3.8941	-29.2966	-31.8349
2012-12-13 00:38:40	28.78	31.27	20.71	3.90105		3.90105	-29.3374	-31.8756
2012-12-13 00:48:40	28.82	31.33	20.71	3.90799		3.90799	-29.3782	-31.9368
2012-12-13 00:58:40	28.87	31.37	20.7	3.91494		3.91494	-29.4292	-31.9776
2012-12-13 01:08:40	28.89	31.39	20.7	3.92188		3.92188	-29.4495	-31.998
2012-12-13 01:18:40	28.93	31.42	20.7	3.92883		3.92883	-29.4903	-32.0285
2012-12-13 01:28:40	28.97	31.47	20.69	3.93577	41256.1	3.93577	-29.5311	-32.0795
2012-12-13 01:38:40	28.99	31.49	20.69	3.94272		3.94272	-29.5515	-32.0999
2012-12-13 01:48:40	29.03	31.54	20.69	3.94966		3.94966	-29.5923	-32.1509
2012-12-13 01:58:40	29.06	31.56	20.68	3.9566		3.9566	-29.6228	-32.1713
2012-12-13 02:08:40	29.11	31.6	20.68	3.96355		3.96355	-29.6738	-32.212
2012-12-13 02:18:40	29.14	31.63	20.68	3.97049		3.97049	-29.7044	-32.2426
2012-12-13 02:28:40	29.15	31.66	20.68	3.97744	41256.1	3.97744	-29.7146	-32.2732
2012-12-13 02:38:40	29.19	31.69	20.67	3.98438		3.98438	-29.7554	-32.3038
2012-12-13 02:48:40	29.22	31.72	20.67	3.99133		3.99133	-29.7859	-32.3344
2012-12-13 02:58:40	29.27	31.76	20.67	3.99827		3.99827	-29.8369	-32.3751
2012-12-13 03:08:40	29.27	31.78	20.67	4.00522		4.00522	-29.8369	-32.3955
2012-12-13 03:18:40	29.22	31.74	20.67	4.01216		4.01216	-29.7859	-32.3547
2012-12-13 03:28:40	29.31	31.82	20.67	4.0191	41256.1	4.0191	-29.8777	-32.4363
2012-12-13 03:38:40	29.37	31.87	20.67	4.02605		4.02605	-29.9388	-32.4873
2012-12-13 03:48:40	29.4	31.89	20.67	4.03299		4.03299	-29.9694	-32.5076
2012-12-13 03:58:40	29.42	31.93	20.67	4.03994		4.03994	-29.9898	-32.5484
2012-12-13 04:08:40	29.48	31.98	20.67	4.04688		4.04688	-30.051	-32.5994
2012-12-13 04:18:40	29.51	32.01	20.67	4.05383		4.05383	-30.0815	-32.63
2012-12-13 04:28:40	29.5	32.01	20.67	4.06077	41256.2	4.06077	-30.0714	-32.63
2012-12-13 04:38:40	29.58	32.08	20.67	4.06772		4.06772	-30.1529	-32.7013
2012-12-13 04:48:40	29.63	32.13	20.67	4.07466		4.07466	-30.2039	-32.7523
2012-12-13 04:58:40	29.65	32.14	20.67	4.0816		4.0816	-30.2243	-32.7625
2012-12-13 05:08:40	29.69	32.19	20.67	4.08855		4.08855	-30.265	-32.8135
2012-12-13 05:18:40	29.68	32.18	20.67	4.09549		4.09549	-30.2548	-32.8033
2012-12-13 05:28:40	29.75	32.25	20.67	4.10244	41256.2	4.10244	-30.3262	-32.8746
2012-12-13 05:38:40	29.79	32.3	20.67	4.10938		4.10938	-30.367	-32.9256
2012-12-13 05:48:40	29.83	32.34	20.67	4.11633		4.11633	-30.4077	-32.9664
2012-12-13 05:58:40	29.85	32.36	20.67	4.12327		4.12327	-30.4281	-32.9867
2012-12-13 06:08:40	29.88	32.39	20.67	4.13022		4.13022	-30.4587	-33.0173
2012-12-13 06:18:40	29.92	32.42	20.66	4.13716		4.13716	-30.4995	-33.0479
2012-12-13 06:28:40	29.98	32.46	20.66	4.1441	41256.3	4.1441	-30.5607	-33.0887
2012-12-13 06:38:40	30	32.5	20.66	4.15105		4.15105	-30.581	-33.1295
2012-12-13 06:48:40	30.02	32.51	20.66	4.15799		4.15799	-30.6014	-33.1397
2012-12-13 06:58:40	30.06	32.56	20.66	4.16494		4.16494	-30.6422	-33.1906
2012-12-13 07:08:40	30.07	32.57	20.66	4.17188		4.17188	-30.6524	-33.2008
2012-12-13 07:18:40	30.12	32.63	20.66	4.17883		4.17883	-30.7034	-33.262
2012-12-13 07:28:40	30.15	32.66	20.66	4.18577	41256.3	4.18577	-30.7339	-33.2926
2012-12-13 07:38:40	30.19	32.71	20.66	4.19272		4.19272	-30.7747	-33.3435
2012-12-13 07:48:40	30.24	32.75	20.66	4.19966		4.19966	-30.8257	-33.3843
2012-12-13 07:58:40	30.3	32.8	20.67	4.2066		4.2066	-30.8869	-33.4353
2012-12-13 08:08:40	30.33	32.83	20.67	4.21355		4.21355	-30.9174	-33.4659
2012-12-13 08:18:40	30.38	32.88	20.67	4.22049		4.22049	-30.9684	-33.5168
2012-12-13 08:28:40	30.41	32.91	20.68	4.22744	41256.4	4.22744	-30.999	-33.5474
2012-12-13 08:38:40	30.45	32.96	20.68	4.23438		4.23438	-31.0398	-33.5984
2012-12-13 08:48:40	30.49	32.97	20.68	4.24133		4.24133	-31.0805	-33.6086
2012-12-13 08:58:40	30.54	33.05	20.69	4.24827		4.24827	-31.1315	-33.6901
2012-12-13 09:08:40	30.56	33.05	20.69	4.25522		4.25522	-31.1519	-33.6901
2012-12-13 09:18:40	30.59	33.09	20.69	4.26216		4.26216	-31.1825	-33.7309
2012-12-13 09:28:40	30.65	33.15	20.69	4.2691	41256.4	4.2691	-31.2436	-33.792
2012-12-13 09:38:40	30.69	33.19	20.69	4.27605		4.27605	-31.2844	-33.8328
2012-12-13 09:48:40	30.7	33.21	20.7	4.28299		4.28299	-31.2946	-33.8532
2012-12-13 09:58:40	30.45	32.94	20.69	4.28994		4.28994	-31.0398	-33.578
2012-12-13 10:08:40	30.66	33.17	20.71	4.29688		4.29688	-31.2538	-33.8124
2012-12-13 10:18:40	30.72	33.21	20.73	4.30383		4.30383	-31.315	-33.8532
2012-12-13 10:28:40	30.77	33.26	20.73	4.31077	41256.4	4.31077	-31.366	-33.9042
2012-12-13 10:38:40	30.81	33.31	20.74	4.31772		4.31772	-31.4067	-33.9551
2012-12-13 10:48:40	30.82	33.32	20.74	4.32466		4.32466	-31.4169	-33.9653
2012-12-13 10:58:40	30.86	33.36	20.75	4.3316		4.3316	-31.4577	-34.0061
2012-12-13 11:08:40	30.94	33.44	20.75	4.33855		4.33855	-31.5392	-34.0877
2012-12-13 11:18:40	30.97	33.47	20.76	4.34549		4.34549	-31.5698	-34.1182
2012-12-13 11:28:40	31.02	33.5	20.77	4.35244	41256.5	4.35244	-31.6208	-34.1488
2012-12-13 11:38:40	31.06	33.56	20.77	4.35938		4.35938	-31.6616	-34.21
2012-12-13 11:48:40	31.08	33.57	20.78	4.36633		4.36633	-31.682	-34.2202
2012-12-13 11:58:40	31.13	33.62	20.79	4.37327		4.37327	-31.7329	-34.2712
2012-12-13 12:08:40	31.19	33.67	20.79	4.38022		4.38022	-31.7941	-34.3221
2012-12-13 12:18:40	31.2	33.68	20.8	4.38716		4.38716	-31.8043	-34.3323
2012-12-13 12:28:40	31.24	33.73	20.81	4.3941	41256.5	4.3941	-31.8451	-34.3833
2012-12-13 12:38:40	31.28	33.75	20.81	4.40105		4.40105	-31.8858	-34.4037
2012-12-13 12:48:40	31.35	33.83	20.82	4.40799		4.40799	-31.9572	-34.4852
2012-12-13 12:58:40	31.04	33.51	20.85	4.41494		4.41494	-31.6412	-34.159
2012-12-13 13:08:40	31.15	33.62	20.9	4.42188		4.42188	-31.7533	-34.2712
2012-12-13 13:18:40	31.22	33.68	20.99	4.42883		4.42883	-31.8247	-34.3323
2012-12-13 13:28:40	31.29	33.74	21.06	4.43577	41256.6	4.43577	-31.896	-34.3935
2012-12-13 13:38:40	31.37	33.8	21.11	4.44272		4.44272	-31.9776	-34.4546
2012-12-13 13:48:40	31.4	33.84	21.15	4.44966		4.44966	-32.0082	-34.4954
2012-12-13 13:58:40	31.43	33.87	21.18	4.4566		4.4566	-32.0387	-34.526
2012-12-13 14:08:40	31.38	33.82	21.21	4.46355		4.46355	-31.9878	-34.475
2012-12-13 14:18:40	31.45	33.88	21.23	4.47049		4.47049	-32.0591	-34.5362
2012-12-13 14:28:40	31.5	33.94	21.25	4.47744	41256.6	4.47744	-32.1101	-34.5973
2012-12-13 14:38:40	31.51	33.94	21.27	4.48438		4.48438	-32.1203	-34.5973
2012-12-13 14:48:40	31.6	34.04	21.27	4.49133		4.49133	-32.212	-34.6993
2012-12-13 14:58:40	31.65	34.08	21.27	4.49827		4.49827	-32.263	-34.7401
2012-12-13 15:08:40	31.66	34.09	21.27	4.50522		4.50522	-32.2732	-34.7503
2012-12-13 15:18:40	31.53	33.91	21.26	4.51216		4.51216	-32.1407	-34.5668
2012-12-13 15:28:40	31.57	33.96	21.25	4.5191	41256.6	4.5191	-32.1814	-34.6177
2012-12-13 15:38:40	31.58	33.96	21.24	4.52605		4.52605	-32.1916	-34.6177
2012-12-13 15:48:40	31.66	34.04	21.22	4.53299		4.53299	-32.2732	-34.6993
2012-12-13 15:58:40	31.71	34.08	21.21	4.53994		4.53994	-32.3242	-34.7401
2012-12-13 16:08:40	31.76	34.15	21.2	4.54688		4.54688	-32.3751	-34.8114
2012-12-13 16:18:40	31.81	34.2	21.18	4.55383		4.55383	-32.4261	-34.8624
2012-12-13 16:28:40	31.88	34.27	21.17	4.56077	41256.7	4.56077	-32.4975	-34.9337
2012-12-13 16:38:40	31.92	34.32	21.15	4.56772		4.56772	-32.5382	-34.9847
2012-12-13 16:48:40	31.98	34.38	21.13	4.57466		4.57466	-32.5994	-35.0459
2012-12-13 16:58:40	32.05	34.45	21.11	4.5816		4.5816	-32.6707	-35.1172
2012-12-13 17:08:40	32.11	34.5	21.1	4.58855		4.58855	-32.7319	-35.1682
2012-12-13 17:18:40	32.16	34.55	21.08	4.59549		4.59549	-32.7829	-35.2192
2012-12-13 17:28:40	32.23	34.63	21.06	4.60244	41256.7	4.60244	-32.8542	-35.3007
2012-12-13 17:38:40	32.27	34.68	21.04	4.60938		4.60938	-32.895	-35.3517
2012-12-13 17:48:40	32.34	34.75	21.02	4.61633		4.61633	-32.9664	-35.423
2012-12-13 17:58:40	32.4	34.8	21	4.62327		4.62327	-33.0275	-35.474
2012-12-13 18:08:40	32.45	34.87	20.98	4.63022		4.63022	-33.0785	-35.5454
2012-12-13 18:18:40	32.53	34.94	20.96	4.63716		4.63716	-33.16	-35.6167
2012-12-13 18:28:40	32.58	35.01	20.95	4.6441	41256.8	4.6441	-33.211	-35.6881
2012-12-13 18:38:40	32.64	35.06	20.93	4.65105		4.65105	-33.2722	-35.739
2012-12-13 18:48:40	32.69	35.11	20.91	4.65799		4.65799	-33.3231	-35.79
2012-12-13 18:58:40	32.74	35.16	20.89	4.66494		4.66494	-33.3741	-35.841
2012-12-13 19:08:40	32.78	35.21	20.87	4.67188		4.67188	-33.4149	-35.8919
2012-12-13 19:18:40	32.84	35.31	20.85	4.67883		4.67883	-33.476	-35.9939
2012-12-13 19:28:40	32.91	35.32	20.83	4.68577	41256.8	4.68577	-33.5474	-36.0041
2012-12-13 19:38:40	32.96	35.39	20.81	4.69272		4.69272	-33.5984	-36.0754
2012-12-13 19:48:40	33.02	35.46	20.79	4.69966		4.69966	-33.6595	-36.1468
2012-12-13 19:58:40	33.09	35.51	20.77	4.7066		4.7066	-33.7309	-36.1978
2012-12-13 20:08:40	33.14	35.56	20.75	4.71355		4.71355	-33.7819	-36.2487
2012-12-13 20:18:40	33.18	35.62	20.74	4.72049		4.72049	-33.8226	-36.3099
2012-12-13 20:28:40	33.26	35.7	20.72	4.72744	41256.9	4.72744	-33.9042	-36.3914
2012-12-13 20:38:40	33.32	35.75	20.7	4.73438		4.73438	-33.9653	-36.4424
2012-12-13 20:48:40	33.37	35.82	20.69	4.74133		4.74133	-34.0163	-36.5138
2012-12-13 20:58:40	33.43	35.87	20.68	4.74827		4.74827	-34.0775	-36.5647
2012-12-13 21:08:40	33.49	35.92	20.66	4.75522		4.75522	-34.1386	-36.6157
2012-12-13 21:18:40	33.53	35.98	20.65	4.76216		4.76216	-34.1794	-36.6769
2012-12-13 21:28:40	33.59	36.04	20.64	4.7691	41256.9	4.7691	-34.2406	-36.738
2012-12-13 21:38:40	33.65	36.1	20.62	4.77605		4.77605	-34.3017	-36.7992
2012-12-13 21:48:40	33.71	36.16	20.61	4.78299		4.78299	-34.3629	-36.8603
2012-12-13 21:58:40	33.77	36.2	20.6	4.78994		4.78994	-34.4241	-36.9011
2012-12-13 22:08:40	33.24	35.76	20.59	4.79688		4.79688	-33.8838	-36.4526
2012-12-13 22:18:40	33.57	36.09	20.61	4.80383		4.80383	-34.2202	-36.789
2012-12-13 22:28:40	33.8	36.32	20.62	4.81077	41256.9	4.81077	-34.4546	-37.0234
2012-12-13 22:38:40	33.93	36.45	20.62	4.81772		4.81772	-34.5872	-37.156
2012-12-13 22:48:40	34	36.5	20.62	4.82466		4.82466	-34.6585	-37.2069
2012-12-13 22:58:40	34.1	36.62	20.61	4.8316		4.8316	-34.7604	-37.3293
2012-12-13 23:08:40	34.17	36.68	20.61	4.83855		4.83855	-34.8318	-37.3904
2012-12-13 23:18:40	34.22	36.75	20.61	4.84549		4.84549	-34.8828	-37.4618
2012-12-13 23:28:40	34.27	36.8	20.6	4.85244	41257	4.85244	-34.9337	-37.5127
2012-12-13 23:38:40	34.35	36.87	20.6	4.85938		4.85938	-35.0153	-37.5841
2012-12-13 23:48:40	34.4	36.92	20.6	4.86633		4.86633	-35.0663	-37.6351
2012-12-13 23:58:40	34.46	36.98	20.6	4.87327		4.87327	-35.1274	-37.6962
2012-12-14 00:08:40	34.51	37.03	20.59	4.88022		4.88022	-35.1784	-37.7472
2012-12-14 00:18:40	34.53	37.09	20.59	4.88716		4.88716	-35.1988	-37.8084
2012-12-14 00:28:40	34.62	37.14	20.59	4.8941	41257	4.8941	-35.2905	-37.8593
2012-12-14 00:38:40	34.66	37.18	20.58	4.90105		4.90105	-35.3313	-37.9001
2012-12-14 00:48:40	34.71	37.24	20.58	4.90799		4.90799	-35.3823	-37.9613
2012-12-14 00:58:40	34.77	37.3	20.58	4.91494		4.91494	-35.4434	-38.0224
2012-12-14 01:08:40	34.87	37.4	20.57	4.92188		4.92188	-35.5454	-38.1244
2012-12-14 01:18:40	34.9	37.42	20.57	4.92883		4.92883	-35.5759	-38.1448
2012-12-14 01:28:40	34.96	37.48	20.56	4.93577	41257.1	4.93577	-35.6371	-38.2059
2012-12-14 01:38:40	35.01	37.53	20.56	4.94272		4.94272	-35.6881	-38.2569
2012-12-14 01:48:40	35.07	37.6	20.55	4.94966		4.94966	-35.7492	-38.3282
2012-12-14 01:58:40	35.15	37.68	20.55	4.9566		4.9566	-35.8308	-38.4098
2012-12-14 02:08:40	35.18	37.7	20.54	4.96355		4.96355	-35.8614	-38.4302
2012-12-14 02:18:40	35.23	37.76	20.54	4.97049		4.97049	-35.9123	-38.4913
2012-12-14 02:28:40	35.28	37.81	20.53	4.97744	41257.1	4.97744	-35.9633	-38.5423
2012-12-14 02:38:40	35.35	37.88	20.52	4.98438		4.98438	-36.0347	-38.6137
2012-12-14 02:48:40	35.41	37.94	20.52	4.99133		4.99133	-36.0958	-38.6748
2012-12-14 02:58:40	35.46	37.99	20.51	4.99827		4.99827	-36.1468	-38.7258
2012-12-14 03:08:40	35.54	38.06	20.51	5.00522		5.00522	-36.2283	-38.7971
2012-12-14 03:18:40	35.57	38.1	20.5	5.01216		5.01216	-36.2589	-38.8379
2012-12-14 03:28:40	35.44	37.92	20.5	5.0191	41257.1	5.0191	-36.1264	-38.6544
2012-12-14 03:38:40	35.5	37.98	20.5	5.02605		5.02605	-36.1876	-38.7156
2012-12-14 03:48:40	35.52	38.01	20.5	5.03299		5.03299	-36.208	-38.7462
2012-12-14 03:58:40	35.59	38.06	20.5	5.03994		5.03994	-36.2793	-38.7971
2012-12-14 04:08:40	35.58	38.07	20.49	5.04688		5.04688	-36.2691	-38.8073
2012-12-14 04:18:40	35.68	38.16	20.49	5.05383		5.05383	-36.371	-38.8991
2012-12-14 04:28:40	35.75	38.24	20.49	5.06077	41257.2	5.06077	-36.4424	-38.9806
2012-12-14 04:38:40	35.8	38.29	20.49	5.06772		5.06772	-36.4934	-39.0316
2012-12-14 04:48:40	35.88	38.35	20.5	5.07466		5.07466	-36.5749	-39.0928
2012-12-14 04:58:40	35.92	38.4	20.5	5.0816		5.0816	-36.6157	-39.1437
2012-12-14 05:08:40	36	38.48	20.5	5.08855		5.08855	-36.6972	-39.2253
2012-12-14 05:18:40	36.06	38.55	20.5	5.09549		5.09549	-36.7584	-39.2966
2012-12-14 05:28:40	36.13	38.6	20.5	5.10244	41257.2	5.10244	-36.8298	-39.3476
2012-12-14 05:38:40	36.17	38.66	20.51	5.10938		5.10938	-36.8705	-39.4088
2012-12-14 05:48:40	36.24	38.71	20.51	5.11633		5.11633	-36.9419	-39.4597
2012-12-14 05:58:40	36.27	38.75	20.52	5.12327		5.12327	-36.9725	-39.5005
2012-12-14 06:08:40	36.3	38.79	20.52	5.13022		5.13022	-37.0031	-39.5413
2012-12-14 06:18:40	36.38	38.85	20.52	5.13716		5.13716	-37.0846	-39.6024
2012-12-14 06:28:40	36.41	38.89	20.53	5.1441	41257.3	5.1441	-37.1152	-39.6432
2012-12-14 06:38:40	36.48	38.95	20.53	5.15105		5.15105	-37.1865	-39.7044
2012-12-14 06:48:40	36.54	39.02	20.54	5.15799		5.15799	-37.2477	-39.7757
2012-12-14 06:58:40	36.57	39.05	20.54	5.16494		5.16494	-37.2783	-39.8063
2012-12-14 07:08:40	36.64	39.12	20.55	5.17188		5.17188	-37.3496	-39.8777
2012-12-14 07:18:40	36.7	39.18	20.55	5.17883		5.17883	-37.4108	-39.9388
2012-12-14 07:28:40	36.74	39.22	20.56	5.18577	41257.3	5.18577	-37.4516	-39.9796
2012-12-14 07:38:40	36.79	39.26	20.56	5.19272		5.19272	-37.5025	-40.0204
2012-12-14 07:48:40	36.84	39.33	20.57	5.19966		5.19966	-37.5535	-40.0917
2012-12-14 07:58:40	36.89	39.35	20.58	5.2066		5.2066	-37.6045	-40.1121
2012-12-14 08:08:40	36.87	39.36	20.59	5.21355		5.21355	-37.5841	-40.1223
2012-12-14 08:18:40	36.91	39.39	20.61	5.22049		5.22049	-37.6249	-40.1529
2012-12-14 08:28:40	36.96	39.42	20.62	5.22744	41257.4	5.22744	-37.6758	-40.1835
2012-12-14 08:38:40	36.98	39.46	20.65	5.23438		5.23438	-37.6962	-40.2243
2012-12-14 08:48:40	37.03	39.49	20.68	5.24133		5.24133	-37.7472	-40.2548
2012-12-14 08:58:40	36.99	39.5	20.7	5.24827		5.24827	-37.7064	-40.265
2012-12-14 09:08:40	37.12	39.59	20.73	5.25522		5.25522	-37.8389	-40.3568
2012-12-14 09:18:40	37.15	39.62	20.75	5.26216		5.26216	-37.8695	-40.3874
2012-12-14 09:28:40	37.05	39.58	20.76	5.2691	41257.4	5.2691	-37.7676	-40.3466
2012-12-14 09:38:40	37.32	39.82	20.81	5.27605		5.27605	-38.0428	-40.5912
2012-12-14 09:48:40	37.41	39.93	20.84	5.28299		5.28299	-38.1346	-40.7034
2012-12-14 09:58:40	37.46	39.97	20.86	5.28994		5.28994	-38.1855	-40.7441
2012-12-14 10:08:40	37.5	40.04	20.88	5.29688		5.29688	-38.2263	-40.8155
2012-12-14 10:18:40	37.58	40.09	20.89	5.30383		5.30383	-38.3078	-40.8665
2012-12-14 10:28:40	37.64	40.14	20.9	5.31077	41257.4	5.31077	-38.369	-40.9174
2012-12-14 10:38:40	37.71	40.2	20.92	5.31772		5.31772	-38.4404	-40.9786
2012-12-14 10:48:40	37.74	40.23	20.93	5.32466		5.32466	-38.4709	-41.0092
2012-12-14 10:58:40	37.8	40.3	20.94	5.3316		5.3316	-38.5321	-41.0805
2012-12-14 11:08:40	37.87	40.37	20.95	5.33855		5.33855	-38.6035	-41.1519
2012-12-14 11:18:40	37.89	40.4	20.96	5.34549		5.34549	-38.6239	-41.1825
2012-12-14 11:28:40	37.93	40.44	20.97	5.35244	41257.5	5.35244	-38.6646	-41.2232
2012-12-14 11:38:40	38.02	40.5	20.98	5.35938		5.35938	-38.7564	-41.2844
2012-12-14 11:48:40	38.06	40.57	20.99	5.36633		5.36633	-38.7971	-41.3558
2012-12-14 11:58:40	38.12	40.6	21.01	5.37327		5.37327	-38.8583	-41.3863
2012-12-14 12:08:40	38.16	40.63	21.03	5.38022		5.38022	-38.8991	-41.4169
2012-12-14 12:18:40	38.17	40.69	21.04	5.38716		5.38716	-38.9093	-41.4781
2012-12-14 12:28:40	38.23	40.72	21.07	5.3941	41257.5	5.3941	-38.9704	-41.5087
2012-12-14 12:38:40	38.29	40.77	21.09	5.40105		5.40105	-39.0316	-41.5596
2012-12-14 12:48:40	38.34	40.83	21.1	5.40799		5.40799	-39.0826	-41.6208
2012-12-14 12:58:40	38.39	40.88	21.12	5.41494		5.41494	-39.1335	-41.6718
2012-12-14 13:08:40	38.43	40.91	21.14	5.42188		5.42188	-39.1743	-41.7023
2012-12-14 13:18:40	38.51	40.97	21.15	5.42883		5.42883	-39.2559	-41.7635
2012-12-14 13:28:40	38.52	40.99	21.17	5.43577	41257.6	5.43577	-39.2661	-41.7839
2012-12-14 13:38:40	38.58	41.06	21.18	5.44272		5.44272	-39.3272	-41.8552
2012-12-14 13:48:40	38.61	41.09	21.19	5.44966		5.44966	-39.3578	-41.8858
2012-12-14 13:58:40	38.66	41.15	21.2	5.4566		5.4566	-39.4088	-41.947
2012-12-14 14:08:40	38.72	41.2	21.21	5.46355		5.46355	-39.4699	-41.998
2012-12-14 14:18:40	38.77	41.24	21.22	5.47049		5.47049	-39.5209	-42.0387
2012-12-14 14:28:40	38.79	41.28	21.22	5.47744	41257.6	5.47744	-39.5413	-42.0795
2012-12-14 14:38:40	38.87	41.32	21.23	5.48438		5.48438	-39.6228	-42.1203
2012-12-14 14:48:40	38.91	41.38	21.23	5.49133		5.49133	-39.6636	-42.1814
2012-12-14 14:58:40	38.97	41.44	21.24	5.49827		5.49827	-39.7248	-42.2426
2012-12-14 15:08:40	39.03	41.46	21.24	5.50522		5.50522	-39.7859	-42.263
2012-12-14 15:18:40	39.05	41.52	21.25	5.51216		5.51216	-39.8063	-42.3242
2012-12-14 15:28:40	39.12	41.6	21.25	5.5191	41257.6	5.5191	-39.8777	-42.4057
2012-12-14 15:38:40	39.18	41.63	21.25	5.52605		5.52605	-39.9388	-42.4363
2012-12-14 15:48:40	39.24	41.72	21.25	5.53299		5.53299	-40	-42.528
2012-12-14 15:58:40	39.3	41.75	21.25	5.53994		5.53994	-40.0612	-42.5586
2012-12-14 16:08:40	39.33	41.82	21.25	5.54688		5.54688	-40.0917	-42.63
2012-12-14 16:18:40	39.43	41.9	21.25	5.55383		5.55383	-40.1937	-42.7115
2012-12-14 16:28:40	39.46	41.97	21.24	5.56077	41257.7	5.56077	-40.2243	-42.7829
2012-12-14 16:38:40	39.57	42.04	21.24	5.56772		5.56772	-40.3364	-42.8542
2012-12-14 16:48:40	39.6	42.09	21.23	5.57466		5.57466	-40.367	-42.9052
2012-12-14 16:58:40	39.66	42.14	21.22	5.5816		5.5816	-40.4281	-42.9562
2012-12-14 17:08:40	39.74	42.24	21.2	5.58855		5.58855	-40.5097	-43.0581
2012-12-14 17:18:40	39.79	42.3	21.19	5.59549		5.59549	-40.5607	-43.1193
2012-12-14 17:28:40	39.87	42.35	21.18	5.60244	41257.7	5.60244	-40.6422	-43.1702
2012-12-14 17:38:40	39.9	42.38	21.16	5.60938		5.60938	-40.6728	-43.2008
2012-12-14 17:48:40	40	42.49	21.15	5.61633		5.61633	-40.7747	-43.3129
2012-12-14 17:58:40	40.05	42.53	21.14	5.62327		5.62327	-40.8257	-43.3537
2012-12-14 18:08:40	40.14	42.6	21.12	5.63022		5.63022	-40.9174	-43.4251
2012-12-14 18:18:40	40.21	42.7	21.11	5.63716		5.63716	-40.9888	-43.527
2012-12-14 18:28:40	40.25	42.72	21.1	5.6441	41257.8	5.6441	-41.0296	-43.5474
2012-12-14 18:38:40	40.31	42.81	21.09	5.65105		5.65105	-41.0907	-43.6391
2012-12-14 18:48:40	40.38	42.89	21.09	5.65799		5.65799	-41.1621	-43.7207
2012-12-14 18:58:40	40.46	42.97	21.1	5.66494		5.66494	-41.2436	-43.8022
2012-12-14 19:08:40	40.2	42.68	21.13	5.67188		5.67188	-40.9786	-43.5066
2012-12-14 19:18:40	40.34	42.82	21.2	5.67883		5.67883	-41.1213	-43.6493
2012-12-14 19:28:40	40.44	42.92	21.26	5.68577	41257.8	5.68577	-41.2232	-43.7513
2012-12-14 19:38:40	40.54	43	21.29	5.69272		5.69272	-41.3252	-43.8328
2012-12-14 19:48:40	40.61	43.07	21.32	5.69966		5.69966	-41.3965	-43.9042
2012-12-14 19:58:40	40.55	43.14	21.34	5.7066		5.7066	-41.3354	-43.9755
2012-12-14 20:08:40	40.69	43.12	21.35	5.71355		5.71355	-41.4781	-43.9551
2012-12-14 20:18:40	40.78	43.22	21.4	5.72049		5.72049	-41.5698	-44.0571
2012-12-14 20:28:40	40.83	43.25	21.42	5.72744	41257.9	5.72744	-41.6208	-44.0877
2012-12-14 20:38:40	40.92	43.34	21.43	5.73438		5.73438	-41.7125	-44.1794
2012-12-14 20:48:40	40.98	43.41	21.42	5.74133		5.74133	-41.7737	-44.2508
2012-12-14 20:58:40	41.05	43.49	21.41	5.74827		5.74827	-41.8451	-44.3323
2012-12-14 21:08:40	41.17	43.59	21.39	5.75522		5.75522	-41.9674	-44.4343
2012-12-14 21:18:40	41.23	43.66	21.37	5.76216		5.76216	-42.0285	-44.5056
2012-12-14 21:28:40	41.32	43.76	21.35	5.7691	41257.9	5.7691	-42.1203	-44.6075
2012-12-14 21:38:40	41.42	43.83	21.32	5.77605		5.77605	-42.2222	-44.6789
2012-12-14 21:48:40	41.27	43.64	21.3	5.78299		5.78299	-42.0693	-44.4852
2012-12-14 21:58:40	41.35	43.72	21.28	5.78994		5.78994	-42.1509	-44.5668
2012-12-14 22:08:40	41.36	43.79	21.25	5.79688		5.79688	-42.1611	-44.6381
2012-12-14 22:18:40	41.49	43.88	21.23	5.80383		5.80383	-42.2936	-44.7299
2012-12-14 22:28:40	41.56	43.96	21.21	5.81077	41257.9	5.81077	-42.3649	-44.8114
2012-12-14 22:38:40	41.66	44.03	21.18	5.81772		5.81772	-42.4669	-44.8828
2012-12-14 22:48:40	41.76	44.14	21.16	5.82466		5.82466	-42.5688	-44.9949
2012-12-14 22:58:40	41.79	44.2	21.14	5.8316		5.8316	-42.5994	-45.0561
2012-12-14 23:08:40	41.88	44.27	21.12	5.83855		5.83855	-42.6911	-45.1274
2012-12-14 23:18:40	41.94	44.33	21.11	5.84549		5.84549	-42.7523	-45.1886
2012-12-14 23:28:40	41.99	44.39	21.09	5.85244	41258	5.85244	-42.8033	-45.2497
2012-12-14 23:38:40	42.11	44.51	21.07	5.85938		5.85938	-42.9256	-45.3721
2012-12-14 23:48:40	42.15	44.58	21.06	5.86633		5.86633	-42.9664	-45.4434
2012-12-14 23:58:40	42.23	44.63	21.05	5.87327		5.87327	-43.0479	-45.4944
2012-12-15 00:08:40	42.32	44.71	21.03	5.88022		5.88022	-43.1397	-45.5759
2012-12-15 00:18:40	42.38	44.79	21.02	5.88716		5.88716	-43.2008	-45.6575
2012-12-15 00:28:40	42.46	44.87	21.01	5.8941	41258	5.8941	-43.2824	-45.739
2012-12-15 00:38:40	42.53	44.93	21	5.90105		5.90105	-43.3537	-45.8002
2012-12-15 00:48:40	42.62	45.03	20.99	5.90799		5.90799	-43.4455	-45.9021
2012-12-15 00:58:40	42.68	45.08	20.98	5.91494		5.91494	-43.5066	-45.9531
2012-12-15 01:08:40	42.74	45.15	20.97	5.92188		5.92188	-43.5678	-46.0245
2012-12-15 01:18:40	42.78	45.22	20.96	5.92883		5.92883	-43.6086	-46.0958
2012-12-15 01:28:40	42.87	45.3	20.96	5.93577	41258.1	5.93577	-43.7003	-46.1774
2012-12-15 01:38:40	42.93	45.37	20.95	5.94272		5.94272	-43.7615	-46.2487
2012-12-15 01:48:40	43.04	45.47	20.94	5.94966		5.94966	-43.8736	-46.3507
2012-12-15 01:58:40	43.11	45.53	20.94	5.9566		5.9566	-43.945	-46.4118
2012-12-15 02:08:40	43.21	45.62	20.93	5.96355		5.96355	-44.0469	-46.5036
2012-12-15 02:18:40	43.26	45.69	20.93	5.97049		5.97049	-44.0979	-46.5749
2012-12-15 02:28:40	43.31	45.73	20.92	5.97744	41258.1	5.97744	-44.1488	-46.6157
2012-12-15 02:38:40	43.39	45.83	20.92	5.98438		5.98438	-44.2304	-46.7176
2012-12-15 02:48:40	43.46	45.9	20.91	5.99133		5.99133	-44.3017	-46.789
2012-12-15 02:58:40	43.54	45.97	20.91	5.99827		5.99827	-44.3833	-46.8603
2012-12-15 03:08:40	43.62	46.06	20.91	6.00522		6.00522	-44.4648	-46.9521
2012-12-15 03:18:40	43.66	46.08	20.91	6.01216		6.01216	-44.5056	-46.9725
2012-12-15 03:28:40	43.75	46.18	20.91	6.0191	41258.1	6.0191	-44.5973	-47.0744
2012-12-15 03:38:40	43.76	46.2	20.91	6.02605		6.02605	-44.6075	-47.0948
2012-12-15 03:48:40	43.84	46.28	20.91	6.03299		6.03299	-44.6891	-47.1764
2012-12-15 03:58:40	43.91	46.34	20.91	6.03994		6.03994	-44.7604	-47.2375
2012-12-15 04:08:40	43.97	46.4	20.91	6.04688		6.04688	-44.8216	-47.2987
2012-12-15 04:18:40	44.07	46.49	20.91	6.05383		6.05383	-44.9235	-47.3904
2012-12-15 04:28:40	44.13	46.55	20.92	6.06077	41258.2	6.06077	-44.9847	-47.4516
2012-12-15 04:38:40	44.19	46.62	20.92	6.06772		6.06772	-45.0459	-47.5229
2012-12-15 04:48:40	44.25	46.67	20.92	6.07466		6.07466	-45.107	-47.5739
2012-12-15 04:58:40	44.31	46.74	20.93	6.0816		6.0816	-45.1682	-47.6453
2012-12-15 05:08:40	44.41	46.84	20.93	6.08855		6.08855	-45.2701	-47.7472
2012-12-15 05:18:40	44.47	46.9	20.93	6.09549		6.09549	-45.3313	-47.8084
2012-12-15 05:28:40	44.55	46.96	20.93	6.10244	41258.2	6.10244	-45.4128	-47.8695
2012-12-15 05:38:40	44.61	47.03	20.94	6.10938		6.10938	-45.474	-47.9409
2012-12-15 05:48:40	44.67	47.11	20.95	6.11633		6.11633	-45.5352	-48.0224
2012-12-15 05:58:40	44.74	47.18	20.96	6.12327		6.12327	-45.6065	-48.0938
2012-12-15 06:08:40	44.83	47.26	20.97	6.13022		6.13022	-45.6983	-48.1753
2012-12-15 06:18:40	44.92	47.33	20.98	6.13716		6.13716	-45.79	-48.2467
2012-12-15 06:28:40	44.99	47.41	20.99	6.1441	41258.3	6.1441	-45.8614	-48.3282
2012-12-15 06:38:40	45.05	47.46	21.01	6.15105		6.15105	-45.9225	-48.3792
2012-12-15 06:48:40	45.13	47.53	21.02	6.15799		6.15799	-46.0041	-48.4506
2012-12-15 06:58:40	45.2	47.61	21.04	6.16494		6.16494	-46.0754	-48.5321
2012-12-15 07:08:40	45.24	47.66	21.06	6.17188		6.17188	-46.1162	-48.5831
2012-12-15 07:18:40	45.32	47.74	21.07	6.17883		6.17883	-46.1978	-48.6646
2012-12-15 07:28:40	45.33	47.81	21.09	6.18577	41258.3	6.18577	-46.208	-48.736
2012-12-15 07:38:40	45.44	47.86	21.11	6.19272		6.19272	-46.3201	-48.787
2012-12-15 07:48:40	45.52	47.94	21.12	6.19966		6.19966	-46.4016	-48.8685
2012-12-15 07:58:40	45.57	47.98	21.14	6.2066		6.2066	-46.4526	-48.9093
2012-12-15 08:08:40	45.61	48.05	21.16	6.21355		6.21355	-46.4934	-48.9806
2012-12-15 08:18:40	45.65	48.11	21.17	6.22049		6.22049	-46.5341	-49.0418
2012-12-15 08:28:40	45.79	48.19	21.19	6.22744	41258.4	6.22744	-46.6769	-49.1233
2012-12-15 08:38:40	45.85	48.25	21.2	6.23438		6.23438	-46.738	-49.1845
2012-12-15 08:48:40	45.9	48.3	21.22	6.24133		6.24133	-46.789	-49.2355
2012-12-15 08:58:40	45.98	48.39	21.23	6.24827		6.24827	-46.8705	-49.3272
2012-12-15 09:08:40	46.02	48.45	21.24	6.25522		6.25522	-46.9113	-49.3884
2012-12-15 09:18:40	46.07	48.47	21.25	6.26216		6.26216	-46.9623	-49.4088
2012-12-15 09:28:40	46.15	48.54	21.27	6.2691	41258.4	6.2691	-47.0438	-49.4801
2012-12-15 09:38:40	46.24	48.64	21.28	6.27605		6.27605	-47.1356	-49.5821
2012-12-15 09:48:40	46.32	48.71	21.29	6.28299		6.28299	-47.2171	-49.6534
2012-12-15 09:58:40	46.38	48.78	21.29	6.28994		6.28994	-47.2783	-49.7248
2012-12-15 10:08:40	46.46	48.85	21.3	6.29688		6.29688	-47.3598	-49.7961
2012-12-15 10:18:40	46.51	48.92	21.31	6.30383		6.30383	-47.4108	-49.8675
2012-12-15 10:28:40	46.58	48.96	21.32	6.31077	41258.4	6.31077	-47.4822	-49.9083
2012-12-15 10:38:40	46.65	49.03	21.33	6.31772		6.31772	-47.5535	-49.9796
2012-12-15 10:48:40	46.71	49.1	21.34	6.32466		6.32466	-47.6147	-50.051
2012-12-15 10:58:40	46.78	49.15	21.36	6.3316		6.3316	-47.686	-50.1019
2012-12-15 11:08:40	46.84	49.23	21.37	6.33855		6.33855	-47.7472	-50.1835
2012-12-15 11:18:40	46.88	49.28	21.38	6.34549		6.34549	-47.788	-50.2345
2012-12-15 11:28:40	46.93	49.32	21.39	6.35244	41258.5	6.35244	-47.8389	-50.2752
2012-12-15 11:38:40	46.97	49.35	21.41	6.35938		6.35938	-47.8797	-50.3058
2012-12-15 11:48:40	46.96	49.42	21.41	6.36633		6.36633	-47.8695	-50.3772
2012-12-15 11:58:40	47.17	49.6	21.45	6.37327		6.37327	-48.0836	-50.5607
2012-12-15 12:08:40	47.24	49.68	21.48	6.38022		6.38022	-48.1549	-50.6422
2012-12-15 12:18:40	47.35	49.81	21.5	6.38716		6.38716	-48.2671	-50.7747
2012-12-15 12:28:40	47.42	49.89	21.51	6.3941	41258.5	6.3941	-48.3384	-50.8563
2012-12-15 12:38:40	47.49	49.96	21.53	6.40105		6.40105	-48.4098	-50.9276
2012-12-15 12:48:40	47.54	49.99	21.54	6.40799		6.40799	-48.4608	-50.9582
2012-12-15 12:58:40	47.62	50.07	21.54	6.41494		6.41494	-48.5423	-51.0398
2012-12-15 13:08:40	47.72	50.17	21.55	6.42188		6.42188	-48.6442	-51.1417
2012-12-15 13:18:40	47.78	50.23	21.56	6.42883		6.42883	-48.7054	-51.2029
2012-12-15 13:28:40	47.87	50.33	21.56	6.43577	41258.6	6.43577	-48.7971	-51.3048
2012-12-15 13:38:40	47.95	50.41	21.57	6.44272		6.44272	-48.8787	-51.3863
2012-12-15 13:48:40	48	50.46	21.57	6.44966		6.44966	-48.9297	-51.4373
2012-12-15 13:58:40	48.05	50.51	21.57	6.4566		6.4566	-48.9806	-51.4883
2012-12-15 14:08:40	48.14	50.61	21.57	6.46355		6.46355	-49.0724	-51.5902
2012-12-15 14:18:40	48.24	50.7	21.58	6.47049		6.47049	-49.1743	-51.682
2012-12-15 14:28:40	48.3	50.76	21.58	6.47744	41258.6	6.47744	-49.2355	-51.7431
2012-12-15 14:38:40	48.38	50.83	21.58	6.48438		6.48438	-49.317	-51.8145
2012-12-15 14:48:40	48.45	50.9	21.59	6.49133		6.49133	-49.3884	-51.8858
2012-12-15 14:58:40	48.52	50.98	21.59	6.49827		6.49827	-49.4597	-51.9674
2012-12-15 15:08:40	48.6	51.06	21.59	6.50522		6.50522	-49.5413	-52.0489
2012-12-15 15:18:40	48.68	51.14	21.59	6.51216		6.51216	-49.6228	-52.1305
2012-12-15 15:28:40	48.7	51.21	21.59	6.5191	41258.6	6.5191	-49.6432	-52.2018
2012-12-15 15:38:40	48.83	51.29	21.59	6.52605		6.52605	-49.7757	-52.2834
2012-12-15 15:48:40	48.89	51.34	21.59	6.53299		6.53299	-49.8369	-52.3344
2012-12-15 15:58:40	48.95	51.41	21.6	6.53994		6.53994	-49.8981	-52.4057
2012-12-15 16:08:40	49.05	51.5	21.6	6.54688		6.54688	-50	-52.4975
2012-12-15 16:18:40	49.11	51.57	21.6	6.55383		6.55383	-50.0612	-52.5688
2012-12-15 16:28:40	49.22	51.68	21.6	6.56077	41258.7	6.56077	-50.1733	-52.6809
2012-12-15 16:38:40	49.29	51.74	21.6	6.56772		6.56772	-50.2446	-52.7421
2012-12-15 16:48:40	49.37	51.84	21.6	6.57466		6.57466	-50.3262	-52.844
2012-12-15 16:58:40	49.46	51.92	21.6	6.5816		6.5816	-50.4179	-52.9256
2012-12-15 17:08:40	49.52	51.98	21.6	6.58855		6.58855	-50.4791	-52.9867
2012-12-15 17:18:40	49.6	52.07	21.6	6.59549		6.59549	-50.5607	-53.0785
2012-12-15 17:28:40	49.68	52.14	21.6	6.60244	41258.7	6.60244	-50.6422	-53.1498
2012-12-15 17:38:40	49.76	52.22	21.6	6.60938		6.60938	-50.7238	-53.2314
2012-12-15 17:48:40	49.82	52.29	21.61	6.61633		6.61633	-50.7849	-53.3028
2012-12-15 17:58:40	49.92	52.38	21.61	6.62327		6.62327	-50.8869	-53.3945
2012-12-15 18:08:40	49.99	52.43	21.61	6.63022		6.63022	-50.9582	-53.4455
2012-12-15 18:18:40	50.06	52.51	21.61	6.63716		6.63716	-51.0296	-53.527
2012-12-15 18:28:40	50.17	52.63	21.61	6.6441	41258.8	6.6441	-51.1417	-53.6493
2012-12-15 18:38:40	50.24	52.71	21.61	6.65105		6.65105	-51.213	-53.7309
2012-12-15 18:48:40	50.32	52.79	21.61	6.65799		6.65799	-51.2946	-53.8124
2012-12-15 18:58:40	50.41	52.88	21.61	6.66494		6.66494	-51.3863	-53.9042
2012-12-15 19:08:40	50.51	52.98	21.61	6.67188		6.67188	-51.4883	-54.0061
2012-12-15 19:18:40	50.62	53.09	21.61	6.67883		6.67883	-51.6004	-54.1182
2012-12-15 19:28:40	50.68	53.16	21.61	6.68577	41258.8	6.68577	-51.6616	-54.1896
2012-12-15 19:38:40	50.8	53.27	21.61	6.69272		6.69272	-51.7839	-54.3017
2012-12-15 19:48:40	50.89	53.35	21.6	6.69966		6.69966	-51.8756	-54.3833
2012-12-15 19:58:40	50.97	53.44	21.6	6.7066		6.7066	-51.9572	-54.475
2012-12-15 20:08:40	51.08	53.54	21.6	6.71355		6.71355	-52.0693	-54.577
2012-12-15 20:18:40	51.17	53.63	21.6	6.72049		6.72049	-52.1611	-54.6687
2012-12-15 20:28:40	51.23	53.7	21.59	6.72744	41258.9	6.72744	-52.2222	-54.7401
2012-12-15 20:38:40	51.34	53.81	21.59	6.73438		6.73438	-52.3344	-54.8522
2012-12-15 20:48:40	51.45	53.91	21.59	6.74133		6.74133	-52.4465	-54.9541
2012-12-15 20:58:40	51.52	53.99	21.58	6.74827		6.74827	-52.5178	-55.0357
2012-12-15 21:08:40	51.58	54.07	21.58	6.75522		6.75522	-52.579	-55.1172
2012-12-15 21:18:40	51.69	54.16	21.58	6.76216		6.76216	-52.6911	-55.209
2012-12-15 21:28:40	51.78	54.25	21.57	6.7691	41258.9	6.7691	-52.7829	-55.3007
2012-12-15 21:38:40	51.87	54.32	21.57	6.77605		6.77605	-52.8746	-55.3721
2012-12-15 21:48:40	51.99	54.45	21.57	6.78299		6.78299	-52.9969	-55.5046
2012-12-15 21:58:40	52.05	54.52	21.57	6.78994		6.78994	-53.0581	-55.5759
2012-12-15 22:08:40	52.13	54.6	21.56	6.79688		6.79688	-53.1397	-55.6575
2012-12-15 22:18:40	52.23	54.7	21.56	6.80383		6.80383	-53.2416	-55.7594
2012-12-15 22:28:40	52.32	54.8	21.56	6.81077	41258.9	6.81077	-53.3333	-55.8614
2012-12-15 22:38:40	52.4	54.87	21.55	6.81772		6.81772	-53.4149	-55.9327
2012-12-15 22:48:40	52.51	54.99	21.55	6.82466		6.82466	-53.527	-56.055
2012-12-15 22:58:40	52.62	55.09	21.55	6.8316		6.8316	-53.6391	-56.157
2012-12-15 23:08:40	52.69	55.16	21.54	6.83855		6.83855	-53.7105	-56.2283
2012-12-15 23:18:40	52.81	55.29	21.53	6.84549		6.84549	-53.8328	-56.3609
2012-12-15 23:28:40	52.9	55.36	21.53	6.85244	41259	6.85244	-53.9246	-56.4322
2012-12-15 23:38:40	52.96	55.42	21.52	6.85938		6.85938	-53.9857	-56.4934
2012-12-15 23:48:40	53.05	55.52	21.52	6.86633		6.86633	-54.0775	-56.5953
2012-12-15 23:58:40	53.17	55.65	21.52	6.87327		6.87327	-54.1998	-56.7278
2012-12-16 00:08:40	53.27	55.75	21.51	6.88022		6.88022	-54.3017	-56.8298
2012-12-16 00:18:40	53.35	55.84	21.51	6.88716		6.88716	-54.3833	-56.9215
2012-12-16 00:28:40	53.42	55.9	21.51	6.8941	41259	6.8941	-54.4546	-56.9827
2012-12-16 00:38:40	53.5	55.97	21.5	6.90105		6.90105	-54.5362	-57.054
2012-12-16 00:48:40	53.62	56.1	21.5	6.90799		6.90799	-54.6585	-57.1865
2012-12-16 00:58:40	53.71	56.19	21.5	6.91494		6.91494	-54.7503	-57.2783
2012-12-16 01:08:40	53.81	56.29	21.5	6.92188		6.92188	-54.8522	-57.3802
2012-12-16 01:18:40	53.9	56.4	21.49	6.92883		6.92883	-54.9439	-57.4924
2012-12-16 01:28:40	53.99	56.49	21.49	6.93577	41259.1	6.93577	-55.0357	-57.5841
2012-12-16 01:38:40	54.1	56.59	21.49	6.94272		6.94272	-55.1478	-57.686
2012-12-16 01:48:40	54.2	56.69	21.49	6.94966		6.94966	-55.2497	-57.788
2012-12-16 01:58:40	54.3	56.8	21.49	6.9566		6.9566	-55.3517	-57.9001
2012-12-16 02:08:40	54.38	56.88	21.49	6.96355		6.96355	-55.4332	-57.9817
2012-12-16 02:18:40	54.47	56.98	21.49	6.97049		6.97049	-55.525	-58.0836
2012-12-16 02:28:40	54.57	57.07	21.48	6.97744	41259.1	6.97744	-55.6269	-58.1753
2012-12-16 02:38:40	54.66	57.17	21.48	6.98438		6.98438	-55.7187	-58.2773
2012-12-16 02:48:40	54.75	57.27	21.48	6.99133		6.99133	-55.8104	-58.3792
2012-12-16 02:58:40	54.86	57.34	21.48	6.99827		6.99827	-55.9225	-58.4506
2012-12-16 03:08:40	54.96	57.47	21.48	7.00522		7.00522	-56.0245	-58.5831
2012-12-16 03:18:40	55.08	57.58	21.48	7.01216		7.01216	-56.1468	-58.6952
2012-12-16 03:28:40	55.16	57.65	21.48	7.0191	41259.1	7.0191	-56.2283	-58.7666
2012-12-16 03:38:40	55.29	57.79	21.48	7.02605		7.02605	-56.3609	-58.9093
2012-12-16 03:48:40	55.4	57.87	21.48	7.03299		7.03299	-56.473	-58.9908
2012-12-16 03:58:40	55.5	58	21.47	7.03994		7.03994	-56.5749	-59.1233
2012-12-16 04:08:40	55.6	58.09	21.47	7.04688		7.04688	-56.6769	-59.2151
2012-12-16 04:18:40	55.69	58.2	21.47	7.05383		7.05383	-56.7686	-59.3272
2012-12-16 04:28:40	55.8	58.3	21.47	7.06077	41259.2	7.06077	-56.8807	-59.4292
2012-12-16 04:38:40	55.89	58.4	21.47	7.06772		7.06772	-56.9725	-59.5311
2012-12-16 04:48:40	55.99	58.5	21.47	7.07466		7.07466	-57.0744	-59.633
2012-12-16 04:58:40	56.11	58.62	21.47	7.0816		7.0816	-57.1967	-59.7554
2012-12-16 05:08:40	56.22	58.71	21.47	7.08855		7.08855	-57.3089	-59.8471
2012-12-16 05:18:40	56.29	58.81	21.47	7.09549		7.09549	-57.3802	-59.949
2012-12-16 05:28:40	56.37	58.89	21.47	7.10244	41259.2	7.10244	-57.4618	-60.0306
2012-12-16 05:38:40	56.49	58.99	21.47	7.10938		7.10938	-57.5841	-60.1325
2012-12-16 05:48:40	56.61	59.11	21.47	7.11633		7.11633	-57.7064	-60.2548
2012-12-16 05:58:40	56.7	59.2	21.47	7.12327		7.12327	-57.7982	-60.3466
2012-12-16 06:08:40	56.8	59.31	21.47	7.13022		7.13022	-57.9001	-60.4587
2012-12-16 06:18:40	56.9	59.42	21.47	7.13716		7.13716	-58.002	-60.5708
2012-12-16 06:28:40	56.98	59.51	21.47	7.1441	41259.3	7.1441	-58.0836	-60.6626
2012-12-16 06:38:40	57.13	59.63	21.47	7.15105		7.15105	-58.2365	-60.7849
2012-12-16 06:48:40	57.22	59.73	21.47	7.15799		7.15799	-58.3282	-60.8869
2012-12-16 06:58:40	57.33	59.84	21.47	7.16494		7.16494	-58.4404	-60.999
2012-12-16 07:08:40	57.45	59.96	21.47	7.17188		7.17188	-58.5627	-61.1213
2012-12-16 07:18:40	57.57	60.08	21.47	7.17883		7.17883	-58.685	-61.2436
2012-12-16 07:28:40	57.68	60.18	21.47	7.18577	41259.3	7.18577	-58.7971	-61.3456
2012-12-16 07:38:40	57.8	60.3	21.47	7.19272		7.19272	-58.9195	-61.4679
2012-12-16 07:48:40	57.85	60.37	21.47	7.19966		7.19966	-58.9704	-61.5392
2012-12-16 07:58:40	57.97	60.48	21.46	7.2066		7.2066	-59.0928	-61.6514
2012-12-16 08:08:40	58.1	60.61	21.46	7.21355		7.21355	-59.2253	-61.7839
2012-12-16 08:18:40	58.19	60.71	21.47	7.22049		7.22049	-59.317	-61.8858
2012-12-16 08:28:40	58.26	60.77	21.47	7.22744	41259.4	7.22744	-59.3884	-61.947
2012-12-16 08:38:40	58.4	60.91	21.48	7.23438		7.23438	-59.5311	-62.0897
2012-12-16 08:48:40	58.49	60.99	21.48	7.24133		7.24133	-59.6228	-62.1713
2012-12-16 08:58:40	58.59	61.1	21.49	7.24827		7.24827	-59.7248	-62.2834
2012-12-16 09:08:40	58.73	61.24	21.49	7.25522		7.25522	-59.8675	-62.4261
2012-12-16 09:18:40	58.85	61.35	21.5	7.26216		7.26216	-59.9898	-62.5382
2012-12-16 09:28:40	58.94	61.43	21.51	7.2691	41259.4	7.2691	-60.0815	-62.6198
2012-12-16 09:38:40	59.02	61.53	21.52	7.27605		7.27605	-60.1631	-62.7217
2012-12-16 09:48:40	59.08	61.58	21.52	7.28299		7.28299	-60.2243	-62.7727
2012-12-16 09:58:40	59.2	61.73	21.53	7.28994		7.28994	-60.3466	-62.9256
2012-12-16 10:08:40	59.33	61.84	21.54	7.29688		7.29688	-60.4791	-63.0377
2012-12-16 10:18:40	59.46	61.97	21.55	7.30383		7.30383	-60.6116	-63.1702
2012-12-16 10:28:40	59.54	62.05	21.55	7.31077	41259.4	7.31077	-60.6932	-63.2518
2012-12-16 10:38:40	59.63	62.14	21.56	7.31772		7.31772	-60.7849	-63.3435
2012-12-16 10:48:40	59.75	62.26	21.57	7.32466		7.32466	-60.9072	-63.4659
2012-12-16 10:58:40	59.89	62.39	21.57	7.3316		7.3316	-61.0499	-63.5984
2012-12-16 11:08:40	59.98	62.49	21.58	7.33855		7.33855	-61.1417	-63.7003
2012-12-16 11:18:40	60.11	62.62	21.59	7.34549		7.34549	-61.2742	-63.8328
2012-12-16 11:28:40	60.19	62.69	21.59	7.35244	41259.5	7.35244	-61.3558	-63.9042
2012-12-16 11:38:40	60.29	62.8	21.6	7.35938		7.35938	-61.4577	-64.0163
2012-12-16 11:48:40	60.39	62.89	21.6	7.36633		7.36633	-61.5596	-64.1081
2012-12-16 11:58:40	60.49	63	21.61	7.37327		7.37327	-61.6616	-64.2202
2012-12-16 12:08:40	60.59	63.15	21.61	7.38022		7.38022	-61.7635	-64.3731
2012-12-16 12:18:40	60.72	63.24	21.62	7.38716		7.38716	-61.896	-64.4648
2012-12-16 12:28:40	60.85	63.35	21.62	7.3941	41259.5	7.3941	-62.0285	-64.577
2012-12-16 12:38:40	60.97	63.46	21.63	7.40105		7.40105	-62.1509	-64.6891
2012-12-16 12:48:40	61.09	63.59	21.63	7.40799		7.40799	-62.2732	-64.8216
2012-12-16 12:58:40	61.19	63.7	21.64	7.41494		7.41494	-62.3751	-64.9337
2012-12-16 13:08:40	61.31	63.81	21.64	7.42188		7.42188	-62.4975	-65.0459
2012-12-16 13:18:40	61.38	63.89	21.65	7.42883		7.42883	-62.5688	-65.1274
2012-12-16 13:28:40	61.5	64.01	21.66	7.43577	41259.6	7.43577	-62.6911	-65.2497
2012-12-16 13:38:40	61.61	64.05	21.66	7.44272		7.44272	-62.8033	-65.2905
2012-12-16 13:48:40	61.72	64.22	21.67	7.44966		7.44966	-62.9154	-65.4638
2012-12-16 13:58:40	61.84	64.31	21.67	7.4566		7.4566	-63.0377	-65.5556
2012-12-16 14:08:40	61.92	64.42	21.68	7.46355		7.46355	-63.1193	-65.6677
2012-12-16 14:18:40	62.07	64.56	21.69	7.47049		7.47049	-63.2722	-65.8104
2012-12-16 14:28:40	62.19	64.72	21.69	7.47744	41259.6	7.47744	-63.3945	-65.9735
2012-12-16 14:38:40	62.34	64.85	21.7	7.48438		7.48438	-63.5474	-66.106
2012-12-16 14:48:40	61.88	64.36	21.7	7.49133		7.49133	-63.0785	-65.6065
2012-12-16 14:58:40	62.18	64.68	21.72	7.49827		7.49827	-63.3843	-65.9327
2012-12-16 15:08:40	62.37	64.87	21.73	7.50522		7.50522	-63.578	-66.1264
2012-12-16 15:18:40	62.54	65.03	21.75	7.51216		7.51216	-63.7513	-66.2895
2012-12-16 15:28:40	62.7	65.19	21.76	7.5191	41259.6	7.5191	-63.9144	-66.4526
2012-12-16 15:38:40	62.85	65.32	21.76	7.52605		7.52605	-64.0673	-66.5851
2012-12-16 15:48:40	63	65.47	21.77	7.53299		7.53299	-64.2202	-66.738
2012-12-16 15:58:40	63.07	65.64	21.77	7.53994		7.53994	-64.2915	-66.9113
2012-12-16 16:08:40	63.24	65.74	21.78	7.54688		7.54688	-64.4648	-67.0133
2012-12-16 16:18:40	63.4	65.88	21.78	7.55383		7.55383	-64.6279	-67.156
2012-12-16 16:28:40	63.55	66.04	21.79	7.56077	41259.7	7.56077	-64.7808	-67.3191
2012-12-16 16:38:40	63.66	66.15	21.79	7.56772		7.56772	-64.893	-67.4312
2012-12-16 16:48:40	63.81	66.3	21.8	7.57466		7.57466	-65.0459	-67.5841
2012-12-16 16:58:40	63.93	66.41	21.8	7.5816		7.5816	-65.1682	-67.6962
2012-12-16 17:08:40	64.06	66.56	21.8	7.58855		7.58855	-65.3007	-67.8491
2012-12-16 17:18:40	64.2	66.69	21.8	7.59549		7.59549	-65.4434	-67.9817
2012-12-16 17:28:40	64.36	66.84	21.81	7.60244	41259.7	7.60244	-65.6065	-68.1346
2012-12-16 17:38:40	64.5	66.99	21.81	7.60938		7.60938	-65.7492	-68.2875
2012-12-16 17:48:40	64.63	67.11	21.81	7.61633		7.61633	-65.8818	-68.4098
2012-12-16 17:58:40	64.79	67.27	21.81	7.62327		7.62327	-66.0449	-68.5729
2012-12-16 18:08:40	64.93	67.39	21.81	7.63022		7.63022	-66.1876	-68.6952
2012-12-16 18:18:40	65.07	67.57	21.81	7.63716		7.63716	-66.3303	-68.8787
2012-12-16 18:28:40	65.2	67.69	21.81	7.6441	41259.8	7.6441	-66.4628	-69.001
2012-12-16 18:38:40	65.33	67.84	21.81	7.65105		7.65105	-66.5953	-69.1539
2012-12-16 18:48:40	65.5	67.99	21.81	7.65799		7.65799	-66.7686	-69.3068
2012-12-16 18:58:40	65.64	68.11	21.81	7.66494		7.66494	-66.9113	-69.4292
2012-12-16 19:08:40	65.73	68.21	21.8	7.67188		7.67188	-67.0031	-69.5311
2012-12-16 19:18:40	65.9	68.4	21.8	7.67883		7.67883	-67.1764	-69.7248
2012-12-16 19:28:40	66.05	68.54	21.79	7.68577	41259.8	7.68577	-67.3293	-69.8675
2012-12-16 19:38:40	66.2	68.69	21.79	7.69272		7.69272	-67.4822	-70.0204
2012-12-16 19:48:40	66.35	68.85	21.78	7.69966		7.69966	-67.6351	-70.1835
2012-12-16 19:58:40	66.49	68.98	21.78	7.7066		7.7066	-67.7778	-70.316
2012-12-16 20:08:40	66.66	69.15	21.78	7.71355		7.71355	-67.9511	-70.4893
2012-12-16 20:18:40	66.8	69.28	21.77	7.72049		7.72049	-68.0938	-70.6218
2012-12-16 20:28:40	66.93	69.41	21.77	7.72744	41259.9	7.72744	-68.2263	-70.7543
2012-12-16 20:38:40	67.08	69.58	21.76	7.73438		7.73438	-68.3792	-70.9276
2012-12-16 20:48:40	67.24	69.72	21.76	7.74133		7.74133	-68.5423	-71.0703
2012-12-16 20:58:40	67.39	69.89	21.76	7.74827		7.74827	-68.6952	-71.2436
2012-12-16 21:08:40	67.54	70.05	21.76	7.75522		7.75522	-68.8481	-71.4067
2012-12-16 21:18:40	67.68	70.17	21.75	7.76216		7.76216	-68.9908	-71.5291
2012-12-16 21:28:40	67.84	70.33	21.75	7.7691	41259.9	7.7691	-69.1539	-71.6922
2012-12-16 21:38:40	67.99	70.48	21.75	7.77605		7.77605	-69.3068	-71.8451
2012-12-16 21:48:40	68.15	70.66	21.75	7.78299		7.78299	-69.4699	-72.0285
2012-12-16 21:58:40	68.3	70.81	21.74	7.78994		7.78994	-69.6228	-72.1814
2012-12-16 22:08:40	68.42	70.95	21.74	7.79688		7.79688	-69.7452	-72.3242
2012-12-16 22:18:40	68.57	71.08	21.74	7.80383		7.80383	-69.8981	-72.4567
2012-12-16 22:28:40	68.75	71.24	21.74	7.81077	41259.9	7.81077	-70.0815	-72.6198
2012-12-16 22:38:40	68.91	71.43	21.73	7.81772		7.81772	-70.2446	-72.8135
2012-12-16 22:48:40	69.08	71.59	21.73	7.82466		7.82466	-70.4179	-72.9766
2012-12-16 22:58:40	69.23	71.74	21.73	7.8316		7.8316	-70.5708	-73.1295
2012-12-16 23:08:40	69.36	71.89	21.73	7.83855		7.83855	-70.7034	-73.2824
2012-12-16 23:18:40	69.5	72.02	21.72	7.84549		7.84549	-70.8461	-73.4149
2012-12-16 23:28:40	69.65	72.17	21.72	7.85244	41260	7.85244	-70.999	-73.5678
2012-12-16 23:38:40	69.81	72.32	21.72	7.85938		7.85938	-71.1621	-73.7207
2012-12-16 23:48:40	69.93	72.46	21.71	7.86633		7.86633	-71.2844	-73.8634
2012-12-16 23:58:40	70.1	72.62	21.71	7.87327		7.87327	-71.4577	-74.0265
2012-12-17 00:08:40	70.27	72.77	21.71	7.88022		7.88022	-71.631	-74.1794
2012-12-17 00:18:40	70.41	72.92	21.71	7.88716		7.88716	-71.7737	-74.3323
2012-12-17 00:28:40	70.57	73.08	21.71	7.8941	41260	7.8941	-71.9368	-74.4954
2012-12-17 00:38:40	70.69	73.2	21.7	7.90105		7.90105	-72.0591	-74.6177
2012-12-17 00:48:40	70.84	73.38	21.7	7.90799		7.90799	-72.212	-74.8012
2012-12-17 00:58:40	70.99	73.51	21.7	7.91494		7.91494	-72.3649	-74.9337
2012-12-17 01:08:40	71.17	73.71	21.69	7.92188		7.92188	-72.5484	-75.1376
2012-12-17 01:18:40	71.34	73.85	21.69	7.92883		7.92883	-72.7217	-75.2803
2012-12-17 01:28:40	71.46	73.98	21.68	7.93577	41260.1	7.93577	-72.844	-75.4128
2012-12-17 01:38:40	71.58	74.13	21.68	7.94272		7.94272	-72.9664	-75.5657
2012-12-17 01:48:40	71.78	74.29	21.68	7.94966		7.94966	-73.1702	-75.7288
2012-12-17 01:58:40	71.94	74.45	21.67	7.9566		7.9566	-73.3333	-75.8919
2012-12-17 02:08:40	72.1	74.61	21.67	7.96355		7.96355	-73.4964	-76.055
2012-12-17 02:18:40	72.24	74.77	21.67	7.97049		7.97049	-73.6391	-76.2181
2012-12-17 02:28:40	72.4	74.95	21.67	7.97744	41260.1	7.97744	-73.8022	-76.4016
2012-12-17 02:38:40	72.56	75.1	21.67	7.98438		7.98438	-73.9653	-76.5545
2012-12-17 02:48:40	72.7	75.23	21.67	7.99133		7.99133	-74.1081	-76.6871
2012-12-17 02:58:40	72.85	75.41	21.67	7.99827		7.99827	-74.261	-76.8705
2012-12-17 03:08:40	73.05	75.58	21.67	8.00522		8.00522	-74.4648	-77.0438
2012-12-17 03:18:40	73.13	75.66	21.67	8.01216		8.01216	-74.5464	-77.1254
2012-12-17 03:28:40	73.3	75.86	21.67	8.0191	41260.1	8.0191	-74.7197	-77.3293
2012-12-17 03:38:40	73.48	76.02	21.67	8.02605		8.02605	-74.9032	-77.4924
2012-12-17 03:48:40	73.64	76.18	21.67	8.03299		8.03299	-75.0663	-77.6555
2012-12-17 03:58:40	73.79	76.32	21.67	8.03994		8.03994	-75.2192	-77.7982
2012-12-17 04:08:40	73.82	76.5	21.67	8.04688		8.04688	-75.2497	-77.9817
2012-12-17 04:18:40	74.1	76.65	21.67	8.05383		8.05383	-75.5352	-78.1346
2012-12-17 04:28:40	74.26	76.8	21.67	8.06077	41260.2	8.06077	-75.6983	-78.2875
2012-12-17 04:38:40	74.42	76.97	21.67	8.06772		8.06772	-75.8614	-78.4608
2012-12-17 04:48:40	74.57	77.09	21.68	8.07466		8.07466	-76.0143	-78.5831
2012-12-17 04:58:40	74.73	77.26	21.68	8.0816		8.0816	-76.1774	-78.7564
2012-12-17 05:08:40	74.86	77.42	21.69	8.08855		8.08855	-76.3099	-78.9195
2012-12-17 05:18:40	74.98	77.55	21.69	8.09549		8.09549	-76.4322	-79.052
2012-12-17 05:28:40	75.16	77.7	21.7	8.10244	41260.2	8.10244	-76.6157	-79.2049
2012-12-17 05:38:40	75.26	77.82	21.71	8.10938		8.10938	-76.7176	-79.3272
2012-12-17 05:48:40	75.45	77.98	21.71	8.11633		8.11633	-76.9113	-79.4903
2012-12-17 05:58:40	75.6	78.15	21.72	8.12327		8.12327	-77.0642	-79.6636
2012-12-17 06:08:40	75.72	78.24	21.73	8.13022		8.13022	-77.1865	-79.7554
2012-12-17 06:18:40	75.87	78.42	21.74	8.13716		8.13716	-77.3394	-79.9388
2012-12-17 06:28:40	76.06	78.59	21.75	8.1441	41260.3	8.1441	-77.5331	-80.1121
2012-12-17 06:38:40	76.22	78.75	21.75	8.15105		8.15105	-77.6962	-80.2752
2012-12-17 06:48:40	76.41	78.97	21.76	8.15799		8.15799	-77.8899	-80.4995
2012-12-17 06:58:40	76.6	79.15	21.77	8.16494		8.16494	-78.0836	-80.683
2012-12-17 07:08:40	76.76	79.31	21.77	8.17188		8.17188	-78.2467	-80.8461
2012-12-17 07:18:40	76.91	79.44	21.78	8.17883		8.17883	-78.3996	-80.9786
2012-12-17 07:28:40	76.95	79.62	21.78	8.18577	41260.3	8.18577	-78.4404	-81.1621
2012-12-17 07:38:40	77.23	79.78	21.79	8.19272		8.19272	-78.7258	-81.3252
2012-12-17 07:48:40	77.44	79.95	21.79	8.19966		8.19966	-78.9399	-81.4985
2012-12-17 07:58:40	77.57	80.13	21.8	8.2066		8.2066	-79.0724	-81.682
2012-12-17 08:08:40	77.75	80.3	21.8	8.21355		8.21355	-79.2559	-81.8552
2012-12-17 08:18:40	77.92	80.47	21.81	8.22049		8.22049	-79.4292	-82.0285
2012-12-17 08:28:40	78.1	80.65	21.81	8.22744	41260.4	8.22744	-79.6126	-82.212
2012-12-17 08:38:40	78.24	80.8	21.82	8.23438		8.23438	-79.7554	-82.3649
2012-12-17 08:48:40	78.45	81	21.83	8.24133		8.24133	-79.9694	-82.5688
2012-12-17 08:58:40	78.63	81.17	21.83	8.24827		8.24827	-80.1529	-82.7421
2012-12-17 09:08:40	78.64	81.18	21.82	8.25522		8.25522	-80.1631	-82.7523
2012-12-17 09:18:40	78.86	81.4	21.86	8.26216		8.26216	-80.3874	-82.9766
2012-12-17 09:28:40	79.03	81.58	21.88	8.2691	41260.4	8.2691	-80.5607	-83.16
2012-12-17 09:38:40	79.2	81.76	21.9	8.27605		8.27605	-80.7339	-83.3435
2012-12-17 09:48:40	79.39	81.9	21.93	8.28299		8.28299	-80.9276	-83.4862
2012-12-17 09:58:40	79.56	82.06	21.95	8.28994		8.28994	-81.1009	-83.6493
2012-12-17 10:08:40	79.66	82.19	21.98	8.29688		8.29688	-81.2029	-83.7819
2012-12-17 10:18:40	79.78	82.3	22.01	8.30383		8.30383	-81.3252	-83.894
2012-12-17 10:28:40	79.97	82.54	22.04	8.31077	41260.4	8.31077	-81.5189	-84.1386
2012-12-17 10:38:40	80.19	82.7	22.09	8.31772		8.31772	-81.7431	-84.3017
2012-12-17 10:48:40	80.21	82.36	22.13	8.32466		8.32466	-81.7635	-83.9551
2012-12-17 10:58:40	80.38	82.93	22.22	8.3316		8.3316	-81.9368	-84.5362
2012-12-17 11:08:40	80.61	83.15	22.32	8.33855		8.33855	-82.1713	-84.7604
2012-12-17 11:18:40	80.81	83.34	22.37	8.34549		8.34549	-82.3751	-84.9541
2012-12-17 11:28:40	80.98	83.46	22.41	8.35244	41260.5	8.35244	-82.5484	-85.0765
2012-12-17 11:38:40	81.09	83.58	22.45	8.35938		8.35938	-82.6606	-85.1988
2012-12-17 11:48:40	81.24	83.7	22.49	8.36633		8.36633	-82.8135	-85.3211
2012-12-17 11:58:40	81.34	83.8	22.52	8.37327		8.37327	-82.9154	-85.423
2012-12-17 12:08:40	81.52	84.02	22.54	8.38022		8.38022	-83.0989	-85.6473
2012-12-17 12:18:40	81.71	84.19	22.54	8.38716		8.38716	-83.2926	-85.8206
2012-12-17 12:28:40	81.86	84.34	22.54	8.3941	41260.5	8.3941	-83.4455	-85.9735
2012-12-17 12:38:40	82.04	84.56	22.53	8.40105		8.40105	-83.629	-86.1978
2012-12-17 12:48:40	82.26	84.74	22.51	8.40799		8.40799	-83.8532	-86.3812
2012-12-17 12:58:40	82.41	84.92	22.49	8.41494		8.41494	-84.0061	-86.5647
2012-12-17 13:08:40	82.64	85.13	22.47	8.42188		8.42188	-84.2406	-86.7788
2012-12-17 13:18:40	82.81	85.32	22.44	8.42883		8.42883	-84.4139	-86.9725
2012-12-17 13:28:40	82.99	85.5	22.41	8.43577	41260.6	8.43577	-84.5973	-87.156
2012-12-17 13:38:40	83.11	85.63	22.39	8.44272		8.44272	-84.7197	-87.2885
2012-12-17 13:48:40	83.3	85.82	22.37	8.44966		8.44966	-84.9134	-87.4822
2012-12-17 13:58:40	83.5	86.02	22.36	8.4566		8.4566	-85.1172	-87.686
2012-12-17 14:08:40	83.74	86.26	22.36	8.46355		8.46355	-85.3619	-87.9307
2012-12-17 14:18:40	83.93	86.43	22.37	8.47049		8.47049	-85.5556	-88.104
2012-12-17 14:28:40	84.11	86.61	22.38	8.47744	41260.6	8.47744	-85.739	-88.2875
2012-12-17 14:38:40	84.28	86.75	22.39	8.48438		8.48438	-85.9123	-88.4302
2012-12-17 14:48:40	84.39	86.9	22.4	8.49133		8.49133	-86.0245	-88.5831
2012-12-17 14:58:40	84.56	87.07	22.42	8.49827		8.49827	-86.1978	-88.7564
2012-12-17 15:08:40	84.75	87.26	22.43	8.50522		8.50522	-86.3914	-88.9501
2012-12-17 15:18:40	84.95	87.44	22.45	8.51216		8.51216	-86.5953	-89.1335
2012-12-17 15:28:40	85.11	87.65	22.45	8.5191	41260.6	8.5191	-86.7584	-89.3476
2012-12-17 15:38:40	85.3	87.83	22.45	8.52605		8.52605	-86.9521	-89.5311
2012-12-17 15:48:40	85.52	88.03	22.45	8.53299		8.53299	-87.1764	-89.735
2012-12-17 15:58:40	85.72	88.23	22.43	8.53994		8.53994	-87.3802	-89.9388
2012-12-17 16:08:40	85.91	88.44	22.42	8.54688		8.54688	-87.5739	-90.1529
2012-12-17 16:18:40	86.08	88.6	22.4	8.55383		8.55383	-87.7472	-90.316
2012-12-17 16:28:40	86.27	88.79	22.38	8.56077	41260.7	8.56077	-87.9409	-90.5097
2012-12-17 16:38:40	86.48	88.99	22.36	8.56772		8.56772	-88.1549	-90.7136
2012-12-17 16:48:40	86.66	89.18	22.34	8.57466		8.57466	-88.3384	-90.9072
2012-12-17 16:58:40	86.85	89.38	22.32	8.5816		8.5816	-88.5321	-91.1111
2012-12-17 17:08:40	87	89.59	22.29	8.58855		8.58855	-88.685	-91.3252
2012-12-17 17:18:40	87.24	89.78	22.27	8.59549		8.59549	-88.9297	-91.5189
2012-12-17 17:28:40	87.44	90	22.25	8.60244	41260.7	8.60244	-89.1335	-91.7431
2012-12-17 17:38:40	87.64	90.21	22.23	8.60938		8.60938	-89.3374	-91.9572
2012-12-17 17:48:40	87.84	90.37	22.21	8.61633		8.61633	-89.5413	-92.1203
2012-12-17 17:58:40	88.03	90.59	22.19	8.62327		8.62327	-89.735	-92.3445
2012-12-17 18:08:40	88.22	90.79	22.17	8.63022		8.63022	-89.9286	-92.5484
2012-12-17 18:18:40	88.41	90.98	22.15	8.63716		8.63716	-90.1223	-92.7421
2012-12-17 18:28:40	88.57	91.12	22.14	8.6441	41260.8	8.6441	-90.2854	-92.8848
2012-12-17 18:38:40	88.77	91.36	22.12	8.65105		8.65105	-90.4893	-93.1295
2012-12-17 18:48:40	88.96	91.55	22.1	8.65799		8.65799	-90.683	-93.3231
2012-12-17 18:58:40	89.18	91.74	22.09	8.66494		8.66494	-90.9072	-93.5168
2012-12-17 19:08:40	89.39	91.96	22.08	8.67188		8.67188	-91.1213	-93.7411
2012-12-17 19:18:40	89.55	92.12	22.06	8.67883		8.67883	-91.2844	-93.9042
2012-12-17 19:28:40	89.75	92.34	22.05	8.68577	41260.8	8.68577	-91.4883	-94.1284
2012-12-17 19:38:40	89.96	92.54	22.03	8.69272		8.69272	-91.7023	-94.3323
2012-12-17 19:48:40	90.16	92.75	22.02	8.69966		8.69966	-91.9062	-94.5464
2012-12-17 19:58:40	90.38	92.97	22	8.7066		8.7066	-92.1305	-94.7706
2012-12-17 20:08:40	90.6	93.19	21.99	8.71355		8.71355	-92.3547	-94.9949
2012-12-17 20:18:40	90.81	93.41	21.98	8.72049		8.72049	-92.5688	-95.2192
2012-12-17 20:28:40	91.01	93.62	21.96	8.72744	41260.9	8.72744	-92.7727	-95.4332
2012-12-17 20:38:40	91.23	93.84	21.95	8.73438		8.73438	-92.9969	-95.6575
2012-12-17 20:48:40	91.43	94.07	21.94	8.74133		8.74133	-93.2008	-95.8919
2012-12-17 20:58:40	91.63	94.26	21.92	8.74827		8.74827	-93.4047	-96.0856
2012-12-17 21:08:40	91.81	94.46	21.91	8.75522		8.75522	-93.5882	-96.2895
2012-12-17 21:18:40	92.03	94.66	21.9	8.76216		8.76216	-93.8124	-96.4934
2012-12-17 21:28:40	92.24	94.87	21.88	8.7691	41260.9	8.7691	-94.0265	-96.7074
2012-12-17 21:38:40	92.47	95.09	21.87	8.77605		8.77605	-94.261	-96.9317
2012-12-17 21:48:40	92.64	95.3	21.86	8.78299		8.78299	-94.4343	-97.1458
2012-12-17 21:58:40	92.82	95.49	21.84	8.78994		8.78994	-94.6177	-97.3394
2012-12-17 22:08:40	93.05	95.7	21.83	8.79688		8.79688	-94.8522	-97.5535
2012-12-17 22:18:40	93.24	95.9	21.82	8.80383		8.80383	-95.0459	-97.7574
2012-12-17 22:28:40	93.49	96.14	21.8	8.81077	41260.9	8.81077	-95.3007	-98.002
2012-12-17 22:38:40	93.64	96.32	21.79	8.81772		8.81772	-95.4536	-98.1855
2012-12-17 22:48:40	93.89	96.55	21.78	8.82466		8.82466	-95.7085	-98.42
2012-12-17 22:58:40	94.09	96.74	21.77	8.8316		8.8316	-95.9123	-98.6137
2012-12-17 23:08:40	94.27	96.94	21.76	8.83855		8.83855	-96.0958	-98.8175
2012-12-17 23:18:40	94.52	97.18	21.75	8.84549		8.84549	-96.3507	-99.0622
2012-12-17 23:28:40	94.74	97.41	21.74	8.85244	41261	8.85244	-96.5749	-99.2966
2012-12-17 23:38:40	94.9	97.57	21.73	8.85938		8.85938	-96.738	-99.4597
2012-12-17 23:48:40	95.16	97.79	21.72	8.86633		8.86633	-97.0031	-99.684
2012-12-17 23:58:40	95.36	98	21.71	8.87327		8.87327	-97.2069	-99.8981
2012-12-18 00:08:40	95.57	98.23	21.7	8.88022		8.88022	-97.421	-100.133
2012-12-18 00:18:40	95.74	98.4	21.7	8.88716		8.88716	-97.5943	-100.306
2012-12-18 00:28:40	95.97	98.63	21.69	8.8941	41261	8.8941	-97.8287	-100.54
2012-12-18 00:38:40	96.16	98.84	21.68	8.90105		8.90105	-98.0224	-100.754
2012-12-18 00:48:40	96.39	99.08	21.67	8.90799		8.90799	-98.2569	-100.999
2012-12-18 00:58:40	96.61	99.31	21.67	8.91494		8.91494	-98.4811	-101.233
2012-12-18 01:08:40	96.85	99.54	21.66	8.92188		8.92188	-98.7258	-101.468
2012-12-18 01:18:40	97.04	99.76	21.65	8.92883		8.92883	-98.9195	-101.692
2012-12-18 01:28:40	97.25	99.94	21.65	8.93577	41261.1	8.93577	-99.1335	-101.876
2012-12-18 01:38:40	97.47	100.16	21.64	8.94272		8.94272	-99.3578	-102.1
2012-12-18 01:48:40	97.67	100.37	21.64	8.94966		8.94966	-99.5617	-102.314
2012-12-18 01:58:40	97.89	100.59	21.63	8.9566		8.9566	-99.7859	-102.538
2012-12-18 02:08:40	98.11	100.82	21.62	8.96355		8.96355	-100.01	-102.773
2012-12-18 02:18:40	98.3	101.05	21.62	8.97049		8.97049	-100.204	-103.007
2012-12-18 02:28:40	98.58	101.28	21.61	8.97744	41261.1	8.97744	-100.489	-103.242
2012-12-18 02:38:40	98.8	101.51	21.61	8.98438		8.98438	-100.714	-103.476
2012-12-18 02:48:40	99.02	101.75	21.6	8.99133		8.99133	-100.938	-103.721
2012-12-18 02:58:40	99.24	101.97	21.6	8.99827		8.99827	-101.162	-103.945
2012-12-18 03:08:40	99.47	102.22	21.6	9.00522		9.00522	-101.397	-104.2
2012-12-18 03:18:40	99.73	102.46	21.59	9.01216		9.01216	-101.662	-104.444
2012-12-18 03:28:40	99.91	102.63	21.59	9.0191	41261.1	9.0191	-101.845	-104.618
2012-12-18 03:38:40	100.14	102.87	21.58	9.02605		9.02605	-102.08	-104.862
2012-12-18 03:48:40	100.36	103.1	21.58	9.03299		9.03299	-102.304	-105.097
2012-12-18 03:58:40	100.57	103.29	21.58	9.03994		9.03994	-102.518	-105.291
2012-12-18 04:08:40	100.77	103.5	21.58	9.04688		9.04688	-102.722	-105.505
2012-12-18 04:18:40	101	103.7	21.57	9.05383		9.05383	-102.956	-105.708
2012-12-18 04:28:40	101.22	103.93	21.57	9.06077	41261.2	9.06077	-103.18	-105.943
2012-12-18 04:38:40	101.43	104.17	21.57	9.06772		9.06772	-103.394	-106.188
2012-12-18 04:48:40	101.6	104.37	21.57	9.07466		9.07466	-103.568	-106.391
2012-12-18 04:58:40	101.8	104.58	21.57	9.0816		9.0816	-103.772	-106.606
2012-12-18 05:08:40	102.04	104.81	21.57	9.08855		9.08855	-104.016	-106.84
2012-12-18 05:18:40	102.29	105.04	21.57	9.09549		9.09549	-104.271	-107.074
2012-12-18 05:28:40	102.52	105.28	21.57	9.10244	41261.2	9.10244	-104.506	-107.319
2012-12-18 05:38:40	102.76	105.51	21.57	9.10938		9.10938	-104.75	-107.554
2012-12-18 05:48:40	102.95	105.73	21.57	9.11633		9.11633	-104.944	-107.778
2012-12-18 05:58:40	103.22	105.99	21.57	9.12327		9.12327	-105.219	-108.043
2012-12-18 06:08:40	103.41	106.2	21.57	9.13022		9.13022	-105.413	-108.257
2012-12-18 06:18:40	103.65	106.39	21.58	9.13716		9.13716	-105.657	-108.451
2012-12-18 06:28:40	103.88	106.64	21.58	9.1441	41261.3	9.1441	-105.892	-108.705
2012-12-18 06:38:40	104.12	106.91	21.58	9.15105		9.15105	-106.137	-108.981
2012-12-18 06:48:40	104.32	107.12	21.58	9.15799		9.15799	-106.34	-109.195
2012-12-18 06:58:40	104.57	107.35	21.58	9.16494		9.16494	-106.595	-109.429
2012-12-18 07:08:40	104.76	107.57	21.58	9.17188		9.17188	-106.789	-109.653
2012-12-18 07:18:40	105.03	107.8	21.58	9.17883		9.17883	-107.064	-109.888
2012-12-18 07:28:40	105.25	108.04	21.58	9.18577	41261.3	9.18577	-107.288	-110.133
2012-12-18 07:38:40	105.43	108.22	21.58	9.19272		9.19272	-107.472	-110.316
2012-12-18 07:48:40	105.67	108.49	21.59	9.19966		9.19966	-107.717	-110.591
2012-12-18 07:58:40	105.89	108.69	21.59	9.2066		9.2066	-107.941	-110.795
2012-12-18 08:08:40	106.13	108.88	21.6	9.21355		9.21355	-108.186	-110.989
2012-12-18 08:18:40	106.29	109.13	21.6	9.22049		9.22049	-108.349	-111.244
2012-12-18 08:28:40	105.87	108.98	21.6	9.22744	41261.4	9.22744	-107.92	-111.091
2012-12-18 08:38:40	106.73	109.52	21.62	9.23438		9.23438	-108.797	-111.641
2012-12-18 08:48:40	107.02	109.76	21.66	9.24133		9.24133	-109.093	-111.886
2012-12-18 08:58:40	107.24	109.95	21.68	9.24827		9.24827	-109.317	-112.08
2012-12-18 09:08:40	107.44	110.19	21.7	9.25522		9.25522	-109.521	-112.324
2012-12-18 09:18:40	107.67	110.41	21.71	9.26216		9.26216	-109.755	-112.548
2012-12-18 09:28:40	107.89	110.65	21.73	9.2691	41261.4	9.2691	-109.98	-112.793
2012-12-18 09:38:40	108.1	110.81	21.74	9.27605		9.27605	-110.194	-112.956
2012-12-18 09:48:40	108.26	111.02	21.75	9.28299		9.28299	-110.357	-113.17
2012-12-18 09:58:40	108.51	111.25	21.77	9.28994		9.28994	-110.612	-113.405
2012-12-18 10:08:40	108.74	111.49	21.78	9.29688		9.29688	-110.846	-113.649
2012-12-18 10:18:40	108.96	111.7	21.8	9.30383		9.30383	-111.07	-113.863
2012-12-18 10:28:40	109.18	111.94	21.81	9.31077	41261.4	9.31077	-111.295	-114.108
2012-12-18 10:38:40	109.38	112.14	21.83	9.31772		9.31772	-111.498	-114.312
2012-12-18 10:48:40	109.62	112.34	21.84	9.32466		9.32466	-111.743	-114.516
2012-12-18 10:58:40	109.84	112.56	21.86	9.3316		9.3316	-111.967	-114.74
2012-12-18 11:08:40	110.07	112.82	21.87	9.33855		9.33855	-112.202	-115.005
2012-12-18 11:18:40	110.27	113.02	21.88	9.34549		9.34549	-112.406	-115.209
2012-12-18 11:28:40	110.51	113.28	21.89	9.35244	41261.5	9.35244	-112.65	-115.474
2012-12-18 11:38:40	110.71	113.49	21.9	9.35938		9.35938	-112.854	-115.688
2012-12-18 11:48:40	110.96	113.71	21.91	9.36633		9.36633	-113.109	-115.912
2012-12-18 11:58:40	111.14	113.94	21.92	9.37327		9.37327	-113.293	-116.147
2012-12-18 12:08:40	111.4	114.19	21.93	9.38022		9.38022	-113.558	-116.402
2012-12-18 12:18:40	111.61	114.4	21.94	9.38716		9.38716	-113.772	-116.616
2012-12-18 12:28:40	111.89	114.68	21.94	9.3941	41261.5	9.3941	-114.057	-116.901
2012-12-18 12:38:40	112.13	114.92	21.95	9.40105		9.40105	-114.302	-117.146
2012-12-18 12:48:40	112.38	115.16	21.95	9.40799		9.40799	-114.557	-117.39
2012-12-18 12:58:40	112.56	115.4	21.96	9.41494		9.41494	-114.74	-117.635
2012-12-18 13:08:40	112.85	115.62	21.96	9.42188		9.42188	-115.036	-117.859
2012-12-18 13:18:40	113.07	115.87	21.97	9.42883		9.42883	-115.26	-118.114
2012-12-18 13:28:40	113.31	116.12	21.97	9.43577	41261.6	9.43577	-115.505	-118.369
2012-12-18 13:38:40	113.55	116.36	21.98	9.44272		9.44272	-115.749	-118.614
2012-12-18 13:48:40	113.79	116.54	21.99	9.44966		9.44966	-115.994	-118.797
2012-12-18 13:58:40	113.99	116.82	21.99	9.4566		9.4566	-116.198	-119.083
2012-12-18 14:08:40	114.25	117.06	22	9.46355		9.46355	-116.463	-119.327
2012-12-18 14:18:40	114.48	117.31	22	9.47049		9.47049	-116.697	-119.582
2012-12-18 14:28:40	114.75	117.54	22.01	9.47744	41261.6	9.47744	-116.972	-119.817
2012-12-18 14:38:40	114.96	117.79	22.01	9.48438		9.48438	-117.187	-120.071
2012-12-18 14:48:40	115.2	118.03	22.02	9.49133		9.49133	-117.431	-120.316
2012-12-18 14:58:40	115.47	118.3	22.02	9.49827		9.49827	-117.706	-120.591
2012-12-18 15:08:40	115.7	118.52	22.03	9.50522		9.50522	-117.941	-120.815
2012-12-18 15:18:40	115.9	118.79	22.03	9.51216		9.51216	-118.145	-121.091
2012-12-18 15:28:40	116.16	119.04	22.04	9.5191	41261.6	9.5191	-118.41	-121.346
2012-12-18 15:38:40	116.43	119.3	22.05	9.52605		9.52605	-118.685	-121.611
2012-12-18 15:48:40	116.7	119.54	22.05	9.53299		9.53299	-118.96	-121.855
2012-12-18 15:58:40	116.93	119.8	22.06	9.53994		9.53994	-119.195	-122.12
2012-12-18 16:08:40	117.19	120.01	22.06	9.54688		9.54688	-119.46	-122.334
2012-12-18 16:18:40	117.33	120.28	22.07	9.55383		9.55383	-119.602	-122.61
2012-12-18 16:28:40	117.69	120.58	22.07	9.56077	41261.7	9.56077	-119.969	-122.915
2012-12-18 16:38:40	117.88	120.53	22.08	9.56772		9.56772	-120.163	-122.864
2012-12-18 16:48:40	118.21	120.82	22.11	9.57466		9.57466	-120.499	-123.16
2012-12-18 16:58:40	118.48	121.09	22.12	9.5816		9.5816	-120.775	-123.435
2012-12-18 17:08:40	118.75	121.35	22.13	9.58855		9.58855	-121.05	-123.7
2012-12-18 17:18:40	118.99	121.62	22.14	9.59549		9.59549	-121.295	-123.976
2012-12-18 17:28:40	119.24	121.86	22.14	9.60244	41261.7	9.60244	-121.549	-124.22
2012-12-18 17:38:40	119.48	122.1	22.15	9.60938		9.60938	-121.794	-124.465
2012-12-18 17:48:40	119.75	122.21	22.16	9.61633		9.61633	-122.069	-124.577
2012-12-18 17:58:40	120.03	122.63	22.16	9.62327		9.62327	-122.355	-125.005
2012-12-18 18:08:40	120.28	122.87	22.17	9.63022		9.63022	-122.61	-125.25
2012-12-18 18:18:40	120.51	123.08	22.17	9.63716		9.63716	-122.844	-125.464
2012-12-18 18:28:40	120.69	123.3	22.18	9.6441	41261.8	9.6441	-123.028	-125.688
2012-12-18 18:38:40	120.93	123.57	22.18	9.65105		9.65105	-123.272	-125.963
2012-12-18 18:48:40	121.22	123.85	22.19	9.65799		9.65799	-123.568	-126.249
2012-12-18 18:58:40	121.51	124.12	22.19	9.66494		9.66494	-123.863	-126.524
2012-12-18 19:08:40	121.77	124.35	22.19	9.67188		9.67188	-124.128	-126.758
2012-12-18 19:18:40	122.02	124.63	22.2	9.67883		9.67883	-124.383	-127.044
2012-12-18 19:28:40	122.23	124.88	22.2	9.68577	41261.8	9.68577	-124.597	-127.299
2012-12-18 19:38:40	122.49	125.12	22.2	9.69272		9.69272	-124.862	-127.543
2012-12-18 19:48:40	122.72	125.35	22.2	9.69966		9.69966	-125.097	-127.778
2012-12-18 19:58:40	122.95	125.59	22.2	9.7066		9.7066	-125.331	-128.022
2012-12-18 20:08:40	123.15	125.81	22.2	9.71355		9.71355	-125.535	-128.247
2012-12-18 20:18:40	123.42	126.1	22.2	9.72049		9.72049	-125.81	-128.542
2012-12-18 20:28:40	123.72	126.35	22.2	9.72744	41261.9	9.72744	-126.116	-128.797
2012-12-18 20:38:40	123.92	126.63	22.2	9.73438		9.73438	-126.32	-129.083
2012-12-18 20:48:40	124.23	126.92	22.19	9.74133		9.74133	-126.636	-129.378
2012-12-18 20:58:40	124.49	127.18	22.19	9.74827		9.74827	-126.901	-129.643
2012-12-18 21:08:40	124.75	127.46	22.19	9.75522		9.75522	-127.166	-129.929
2012-12-18 21:18:40	124.99	127.69	22.18	9.76216		9.76216	-127.411	-130.163
2012-12-18 21:28:40	125.24	127.94	22.18	9.7691	41261.9	9.7691	-127.666	-130.418
2012-12-18 21:38:40	125.47	128.21	22.17	9.77605		9.77605	-127.9	-130.693
2012-12-18 21:48:40	125.72	128.49	22.17	9.78299		9.78299	-128.155	-130.979
2012-12-18 21:58:40	126.01	128.72	22.16	9.78994		9.78994	-128.451	-131.213
2012-12-18 22:08:40	126.22	128.99	22.16	9.79688		9.79688	-128.665	-131.488
2012-12-18 22:18:40	126.54	129.07	22.16	9.80383		9.80383	-128.991	-131.57
2012-12-18 22:28:40	126.78	129.47	22.15	9.81077	41261.9	9.81077	-129.235	-131.978
2012-12-18 22:38:40	127.02	129.79	22.15	9.81772		9.81772	-129.48	-132.304
2012-12-18 22:48:40	127.28	129.95	22.15	9.82466		9.82466	-129.745	-132.467
2012-12-18 22:58:40	127.53	130.32	22.14	9.8316		9.8316	-130	-132.844
2012-12-18 23:08:40	127.81	130.57	22.14	9.83855		9.83855	-130.285	-133.099
2012-12-18 23:18:40	128.07	130.82	22.13	9.84549		9.84549	-130.55	-133.354
2012-12-18 23:28:40	128.34	131.1	22.13	9.85244	41262	9.85244	-130.826	-133.639
2012-12-18 23:38:40	128.61	131.39	22.13	9.85938		9.85938	-131.101	-133.935
2012-12-18 23:48:40	128.86	131.64	22.12	9.86633		9.86633	-131.356	-134.19
2012-12-18 23:58:40	129.13	131.9	22.12	9.87327		9.87327	-131.631	-134.455
2012-12-19 00:08:40	129.37	132.15	22.12	9.88022		9.88022	-131.876	-134.709
2012-12-19 00:18:40	129.65	132.46	22.11	9.88716		9.88716	-132.161	-135.025
2012-12-19 00:28:40	129.89	132.7	22.11	9.8941	41262	9.8941	-132.406	-135.27
2012-12-19 00:38:40	130.17	132.95	22.11	9.90105		9.90105	-132.691	-135.525
2012-12-19 00:48:40	130.41	133.23	22.11	9.90799		9.90799	-132.936	-135.81
2012-12-19 00:58:40	130.67	133.48	22.11	9.91494		9.91494	-133.201	-136.065
2012-12-19 01:08:40	130.94	133.79	22.1	9.92188		9.92188	-133.476	-136.381
2012-12-19 01:18:40	131.21	134.07	22.1	9.92883		9.92883	-133.751	-136.667
2012-12-19 01:28:40	131.47	134.32	22.1	9.93577	41262.1	9.93577	-134.016	-136.922
2012-12-19 01:38:40	131.76	134.58	22.1	9.94272		9.94272	-134.312	-137.187
2012-12-19 01:48:40	132.01	134.88	22.1	9.94966		9.94966	-134.567	-137.492
2012-12-19 01:58:40	132.24	135.13	22.1	9.9566		9.9566	-134.801	-137.747
2012-12-19 02:08:40	132.55	135.39	22.1	9.96355		9.96355	-135.117	-138.012
2012-12-19 02:18:40	132.82	135.68	22.1	9.97049		9.97049	-135.392	-138.308
2012-12-19 02:28:40	133.06	135.94	22.1	9.97744	41262.1	9.97744	-135.637	-138.573
2012-12-19 02:38:40	133.33	136.2	22.1	9.98438		9.98438	-135.912	-138.838
2012-12-19 02:48:40	133.61	136.45	22.09	9.99133		9.99133	-136.198	-139.093
2012-12-19 02:58:40	133.85	136.73	22.09	9.99827		9.99827	-136.442	-139.378
2012-12-19 03:08:40	134.08	136.97	22.09	10.0052		10.0052	-136.677	-139.623
2012-12-19 03:18:40	134.37	137.22	22.09	10.0122		10.0122	-136.972	-139.878
2012-12-19 03:28:40	134.63	137.51	22.09	10.0191	41262.1	10.0191	-137.238	-140.173
2012-12-19 03:38:40	134.89	137.8	22.09	10.026		10.026	-137.503	-140.469
2012-12-19 03:48:40	135.12	138.05	22.09	10.033		10.033	-137.737	-140.724
2012-12-19 03:58:40	135.38	138.32	22.09	10.0399		10.0399	-138.002	-140.999
2012-12-19 04:08:40	135.68	138.61	22.09	10.0469		10.0469	-138.308	-141.295
2012-12-19 04:18:40	135.94	138.87	22.09	10.0538		10.0538	-138.573	-141.56
2012-12-19 04:28:40	136.22	139.09	22.09	10.0608	41262.2	10.0608	-138.858	-141.784
2012-12-19 04:38:40	136.46	139.42	22.09	10.0677		10.0677	-139.103	-142.12
2012-12-19 04:48:40	136.73	139.67	22.09	10.0747		10.0747	-139.378	-142.375
2012-12-19 04:58:40	136.98	139.97	22.09	10.0816		10.0816	-139.633	-142.681
2012-12-19 05:08:40	137.26	140.21	22.09	10.0885		10.0885	-139.918	-142.926
2012-12-19 05:18:40	137.48	140.49	22.09	10.0955		10.0955	-140.143	-143.211
2012-12-19 05:28:40	137.75	140.74	22.09	10.1024	41262.2	10.1024	-140.418	-143.466
2012-12-19 05:38:40	138.01	141.01	22.09	10.1094		10.1094	-140.683	-143.741
2012-12-19 05:48:40	138.28	141.29	22.09	10.1163		10.1163	-140.958	-144.027
2012-12-19 05:58:40	138.56	141.59	22.09	10.1233		10.1233	-141.244	-144.332
2012-12-19 06:08:40	138.82	141.85	22.09	10.1302		10.1302	-141.509	-144.597
2012-12-19 06:18:40	139.08	142.14	22.09	10.1372		10.1372	-141.774	-144.893
2012-12-19 06:28:40	139.37	142.35	22.09	10.1441	41262.3	10.1441	-142.069	-145.107
2012-12-19 06:38:40	139.62	142.68	22.09	10.151		10.151	-142.324	-145.443
2012-12-19 06:48:40	139.86	142.94	22.09	10.158		10.158	-142.569	-145.708
2012-12-19 06:58:40	140.15	143.21	22.09	10.1649		10.1649	-142.864	-145.984
2012-12-19 07:08:40	140.4	143.51	22.09	10.1719		10.1719	-143.119	-146.29
2012-12-19 07:18:40	140.65	143.75	22.09	10.1788		10.1788	-143.374	-146.534
2012-12-19 07:28:40	140.91	144.05	22.08	10.1858	41262.3	10.1858	-143.639	-146.84
2012-12-19 07:38:40	141.17	144.32	22.09	10.1927		10.1927	-143.904	-147.115
2012-12-19 07:48:40	141.45	144.6	22.09	10.1997		10.1997	-144.19	-147.401
2012-12-19 07:58:40	141.69	144.87	22.09	10.2066		10.2066	-144.434	-147.676
2012-12-19 08:08:40	141.96	145.16	22.09	10.2135		10.2135	-144.709	-147.971
2012-12-19 08:18:40	142.17	145.41	22.1	10.2205		10.2205	-144.924	-148.226
2012-12-19 08:28:40	142.46	145.61	22.14	10.2274	41262.4	10.2274	-145.219	-148.43
2012-12-19 08:38:40	142.7	145.87	22.16	10.2344		10.2344	-145.464	-148.695
2012-12-19 08:48:40	142.92	146.13	22.16	10.2413		10.2413	-145.688	-148.96
2012-12-19 08:58:40	143.15	146.4	22.17	10.2483		10.2483	-145.923	-149.235
2012-12-19 09:08:40	143.42	146.69	22.17	10.2552		10.2552	-146.198	-149.531
2012-12-19 09:18:40	143.64	146.9	22.17	10.2622		10.2622	-146.422	-149.745
2012-12-19 09:28:40	143.89	147.18	22.17	10.2691	41262.4	10.2691	-146.677	-150.031
2012-12-19 09:38:40	144.19	147.46	22.17	10.276		10.276	-146.983	-150.316
2012-12-19 09:48:40	144.43	147.68	22.18	10.283		10.283	-147.227	-150.54
2012-12-19 09:58:40	144.69	147.93	22.18	10.2899		10.2899	-147.492	-150.795
2012-12-19 10:08:40	144.95	148.22	22.18	10.2969		10.2969	-147.757	-151.091
2012-12-19 10:18:40	145.15	148.44	22.19	10.3038		10.3038	-147.961	-151.315
2012-12-19 10:28:40	145.41	148.76	22.19	10.3108	41262.4	10.3108	-148.226	-151.641
2012-12-19 10:38:40	145.68	149.01	22.2	10.3177		10.3177	-148.502	-151.896
2012-12-19 10:48:40	145.93	149.24	22.2	10.3247		10.3247	-148.756	-152.13
2012-12-19 10:58:40	146.18	149.5	22.21	10.3316		10.3316	-149.011	-152.396
2012-12-19 11:08:40	146.45	149.73	22.21	10.3385		10.3385	-149.286	-152.63
2012-12-19 11:18:40	146.68	150.05	22.21	10.3455		10.3455	-149.521	-152.956
2012-12-19 11:28:40	146.92	150.29	22.22	10.3524	41262.5	10.3524	-149.766	-153.201
2012-12-19 11:38:40	147.16	150.56	22.22	10.3594		10.3594	-150.01	-153.476
2012-12-19 11:48:40	147.42	150.84	22.22	10.3663		10.3663	-150.275	-153.761
2012-12-19 11:58:40	147.69	151.09	22.22	10.3733		10.3733	-150.55	-154.016
2012-12-19 12:08:40	147.92	151.35	22.22	10.3802		10.3802	-150.785	-154.281
2012-12-19 12:18:40	148.19	151.63	22.22	10.3872		10.3872	-151.06	-154.567
2012-12-19 12:28:40	148.45	151.87	22.22	10.3941	41262.5	10.3941	-151.325	-154.811
2012-12-19 12:38:40	148.7	152.16	22.22	10.401		10.401	-151.58	-155.107
2012-12-19 12:48:40	148.96	152.42	22.22	10.408		10.408	-151.845	-155.372
2012-12-19 12:58:40	149.21	152.67	22.22	10.4149		10.4149	-152.1	-155.627
2012-12-19 13:08:40	149.45	152.87	22.22	10.4219		10.4219	-152.345	-155.831
2012-12-19 13:18:40	149.68	153.09	22.22	10.4288		10.4288	-152.579	-156.055
2012-12-19 13:28:40	149.9	153.39	22.22	10.4358	41262.6	10.4358	-152.803	-156.361
2012-12-19 13:38:40	150.16	153.63	22.22	10.4427		10.4427	-153.068	-156.606
2012-12-19 13:48:40	150.41	153.85	22.22	10.4497		10.4497	-153.323	-156.83
2012-12-19 13:58:40	150.66	154.13	22.22	10.4566		10.4566	-153.578	-157.115
2012-12-19 14:08:40	150.9	154.42	22.21	10.4635		10.4635	-153.823	-157.411
2012-12-19 14:18:40	151.12	154.66	22.21	10.4705		10.4705	-154.047	-157.655
2012-12-19 14:28:40	151.36	154.93	22.21	10.4774	41262.6	10.4774	-154.292	-157.931
2012-12-19 14:38:40	151.59	155.16	22.21	10.4844		10.4844	-154.526	-158.165
2012-12-19 14:48:40	151.83	155.39	22.21	10.4913		10.4913	-154.771	-158.4
2012-12-19 14:58:40	152.02	155.61	22.21	10.4983		10.4983	-154.964	-158.624
2012-12-19 15:08:40	152.25	155.91	22.21	10.5052		10.5052	-155.199	-158.93
2012-12-19 15:18:40	152.5	156.16	22.21	10.5122		10.5122	-155.454	-159.185
2012-12-19 15:28:40	152.76	156.42	22.21	10.5191	41262.6	10.5191	-155.719	-159.45
2012-12-19 15:38:40	152.98	156.65	22.21	10.526		10.526	-155.943	-159.684
2012-12-19 15:48:40	153.21	156.89	22.21	10.533		10.533	-156.177	-159.929
2012-12-19 15:58:40	153.43	157.15	22.21	10.5399		10.5399	-156.402	-160.194
2012-12-19 16:08:40	153.66	157.38	22.21	10.5469		10.5469	-156.636	-160.428
2012-12-19 16:18:40	153.87	157.61	22.21	10.5538		10.5538	-156.85	-160.663
2012-12-19 16:28:40	154.11	157.85	22.21	10.5608	41262.7	10.5608	-157.095	-160.907
2012-12-19 16:38:40	154.34	158.06	22.21	10.5677		10.5677	-157.329	-161.121
2012-12-19 16:48:40	153.97	157.91	22.2	10.5747		10.5747	-156.952	-160.968
2012-12-19 16:58:40	154.71	158.32	22.23	10.5816		10.5816	-157.706	-161.386
2012-12-19 17:08:40	155.01	158.58	22.24	10.5885		10.5885	-158.012	-161.651
2012-12-19 17:18:40	155.23	158.81	22.25	10.5955		10.5955	-158.236	-161.886
2012-12-19 17:28:40	155.5	159.08	22.24	10.6024	41262.7	10.6024	-158.512	-162.161
2012-12-19 17:38:40	155.73	159.33	22.24	10.6094		10.6094	-158.746	-162.416
2012-12-19 17:48:40	155.94	159.54	22.24	10.6163		10.6163	-158.96	-162.63
2012-12-19 17:58:40	156.19	159.79	22.23	10.6233		10.6233	-159.215	-162.885
2012-12-19 18:08:40	156.38	160	22.23	10.6302		10.6302	-159.409	-163.099
2012-12-19 18:18:40	156.65	160.25	22.22	10.6372		10.6372	-159.684	-163.354
2012-12-19 18:28:40	156.86	160.48	22.22	10.6441	41262.8	10.6441	-159.898	-163.588
2012-12-19 18:38:40	157.1	160.76	22.21	10.651		10.651	-160.143	-163.874
2012-12-19 18:48:40	157.3	160.97	22.2	10.658		10.658	-160.347	-164.088
2012-12-19 18:58:40	157.51	161.22	22.2	10.6649		10.6649	-160.561	-164.343
2012-12-19 19:08:40	157.74	161.42	22.19	10.6719		10.6719	-160.795	-164.546
2012-12-19 19:18:40	157.98	161.68	22.18	10.6788		10.6788	-161.04	-164.811
2012-12-19 19:28:40	158.19	161.93	22.17	10.6858	41262.8	10.6858	-161.254	-165.066
2012-12-19 19:38:40	158.43	162.17	22.16	10.6927		10.6927	-161.498	-165.311
2012-12-19 19:48:40	158.65	162.41	22.15	10.6997		10.6997	-161.723	-165.556
2012-12-19 19:58:40	158.85	162.64	22.13	10.7066		10.7066	-161.927	-165.79
2012-12-19 20:08:40	159.09	162.87	22.12	10.7135		10.7135	-162.171	-166.024
2012-12-19 20:18:40	159.31	163.14	22.11	10.7205		10.7205	-162.396	-166.3
2012-12-19 20:28:40	159.54	163.38	22.09	10.7274	41262.9	10.7274	-162.63	-166.544
2012-12-19 20:38:40	159.76	163.6	22.08	10.7344		10.7344	-162.854	-166.769
2012-12-19 20:48:40	159.99	163.88	22.07	10.7413		10.7413	-163.089	-167.054
2012-12-19 20:58:40	160.2	164.1	22.06	10.7483		10.7483	-163.303	-167.278
2012-12-19 21:08:40	160.48	164.36	22.04	10.7552		10.7552	-163.588	-167.543
2012-12-19 21:18:40	160.65	164.6	22.03	10.7622		10.7622	-163.761	-167.788
2012-12-19 21:28:40	160.92	164.85	22.02	10.7691	41262.9	10.7691	-164.037	-168.043
2012-12-19 21:38:40	161.08	165.08	22	10.776		10.776	-164.2	-168.277
2012-12-19 21:48:40	161.37	165.3	21.99	10.783		10.783	-164.495	-168.502
2012-12-19 21:58:40	161.57	165.49	21.98	10.7899		10.7899	-164.699	-168.695
2012-12-19 22:08:40	161.79	165.74	21.96	10.7969		10.7969	-164.924	-168.95
2012-12-19 22:18:40	162.01	166	21.95	10.8038		10.8038	-165.148	-169.215
2012-12-19 22:28:40	162.25	166.26	21.93	10.8108	41262.9	10.8108	-165.392	-169.48
2012-12-19 22:38:40	162.46	166.48	21.92	10.8177		10.8177	-165.607	-169.704
2012-12-19 22:48:40	162.71	166.71	21.91	10.8247		10.8247	-165.861	-169.939
2012-12-19 22:58:40	162.77	166.92	21.89	10.8316		10.8316	-165.923	-170.153
2012-12-19 23:08:40	163.11	167.14	21.88	10.8385		10.8385	-166.269	-170.377
2012-12-19 23:18:40	163.3	167.37	21.87	10.8455		10.8455	-166.463	-170.612
2012-12-19 23:28:40	163.49	167.58	21.86	10.8524	41263	10.8524	-166.656	-170.826
2012-12-19 23:38:40	163.69	167.77	21.86	10.8594		10.8594	-166.86	-171.019
2012-12-19 23:48:40	163.85	167.91	21.86	10.8663		10.8663	-167.023	-171.162
2012-12-19 23:58:40	164.02	168.06	21.86	10.8733		10.8733	-167.197	-171.315
2012-12-20 00:08:40	164.23	168.39	21.86	10.8802		10.8802	-167.411	-171.651
2012-12-20 00:18:40	164.43	168.62	21.86	10.8872		10.8872	-167.615	-171.886
2012-12-20 00:28:40	164.61	168.86	21.86	10.8941	41263	10.8941	-167.798	-172.13
2012-12-20 00:38:40	164.81	169.08	21.86	10.901		10.901	-168.002	-172.355
2012-12-20 00:48:40	165	169.31	21.85	10.908		10.908	-168.196	-172.589
2012-12-20 00:58:40	165.21	169.58	21.85	10.9149		10.9149	-168.41	-172.864
2012-12-20 01:08:40	165.38	169.78	21.84	10.9219		10.9219	-168.583	-173.068
2012-12-20 01:18:40	165.61	170	21.83	10.9288		10.9288	-168.818	-173.293
2012-12-20 01:28:40	165.83	170.23	21.82	10.9358	41263.1	10.9358	-169.042	-173.527
2012-12-20 01:38:40	166.03	170.45	21.81	10.9427		10.9427	-169.246	-173.751
2012-12-20 01:48:40	166.19	170.69	21.79	10.9497		10.9497	-169.409	-173.996
2012-12-20 01:58:40	166.41	170.94	21.78	10.9566		10.9566	-169.633	-174.251
2012-12-20 02:08:40	166.61	171.15	21.77	10.9635		10.9635	-169.837	-174.465
2012-12-20 02:18:40	166.8	171.38	21.76	10.9705		10.9705	-170.031	-174.699
2012-12-20 02:28:40	167	171.59	21.75	10.9774	41263.1	10.9774	-170.234	-174.913
2012-12-20 02:38:40	167.2	171.8	21.74	10.9844		10.9844	-170.438	-175.127
2012-12-20 02:48:40	167.38	172	21.74	10.9913		10.9913	-170.622	-175.331
2012-12-20 02:58:40	167.59	172.23	21.73	10.9983		10.9983	-170.836	-175.566
2012-12-20 03:08:40	167.78	172.45	21.73	11.0052		11.0052	-171.03	-175.79
2012-12-20 03:18:40	167.99	172.68	21.72	11.0122		11.0122	-171.244	-176.024
2012-12-20 03:28:40	168.17	172.89	21.72	11.0191	41263.1	11.0191	-171.427	-176.239
2012-12-20 03:38:40	168.37	173.11	21.71	11.026		11.026	-171.631	-176.463
2012-12-20 03:48:40	168.55	173.34	21.71	11.033		11.033	-171.814	-176.697
2012-12-20 03:58:40	168.74	173.57	21.71	11.0399		11.0399	-172.008	-176.932
2012-12-20 04:08:40	168.93	173.78	21.7	11.0469		11.0469	-172.202	-177.146
2012-12-20 04:18:40	169.12	174.01	21.7	11.0538		11.0538	-172.396	-177.38
2012-12-20 04:28:40	169.34	174.22	21.69	11.0608	41263.2	11.0608	-172.62	-177.594
2012-12-20 04:38:40	169.52	174.45	21.69	11.0677		11.0677	-172.803	-177.829
2012-12-20 04:48:40	169.72	174.66	21.68	11.0747		11.0747	-173.007	-178.043
2012-12-20 04:58:40	169.88	174.87	21.68	11.0816		11.0816	-173.17	-178.257
2012-12-20 05:08:40	170.09	175.07	21.67	11.0885		11.0885	-173.384	-178.461
2012-12-20 05:18:40	170.26	175.32	21.67	11.0955		11.0955	-173.558	-178.716
2012-12-20 05:28:40	170.47	175.54	21.66	11.1024	41263.2	11.1024	-173.772	-178.94
2012-12-20 05:38:40	170.64	175.75	21.66	11.1094		11.1094	-173.945	-179.154
2012-12-20 05:48:40	170.84	175.98	21.66	11.1163		11.1163	-174.149	-179.388
2012-12-20 05:58:40	171.02	176.22	21.65	11.1233		11.1233	-174.332	-179.633
2012-12-20 06:08:40	171.22	176.43	21.65	11.1302		11.1302	-174.536	-179.847
2012-12-20 06:18:40	171.42	176.64	21.65	11.1372		11.1372	-174.74	-180.061
2012-12-20 06:28:40	171.6	176.85	21.65	11.1441	41263.3	11.1441	-174.924	-180.275
2012-12-20 06:38:40	171.79	177.09	21.65	11.151		11.151	-175.117	-180.52
2012-12-20 06:48:40	171.96	177.32	21.65	11.158		11.158	-175.291	-180.754
2012-12-20 06:58:40	172.18	177.53	21.65	11.1649		11.1649	-175.515	-180.968
2012-12-20 07:08:40	172.33	177.77	21.64	11.1719		11.1719	-175.668	-181.213
2012-12-20 07:18:40	172.54	178.02	21.64	11.1788		11.1788	-175.882	-181.468
2012-12-20 07:28:40	172.71	178.23	21.64	11.1858	41263.3	11.1858	-176.055	-181.682
2012-12-20 07:38:40	172.86	178.44	21.65	11.1927		11.1927	-176.208	-181.896
2012-12-20 07:48:40	173.03	178.57	21.65	11.1997		11.1997	-176.381	-182.029
2012-12-20 07:58:40	173.19	178.83	21.66	11.2066		11.2066	-176.544	-182.294
2012-12-20 08:08:40	173.33	179.09	21.67	11.2135		11.2135	-176.687	-182.559
2012-12-20 08:18:40	173.49	179.29	21.69	11.2205		11.2205	-176.85	-182.762
2012-12-20 08:28:40	172.58	179.12	21.69	11.2274	41263.4	11.2274	-175.923	-182.589
2012-12-20 08:38:40	173.85	179.73	21.73	11.2344		11.2344	-177.217	-183.211
2012-12-20 08:48:40	174.04	179.95	21.76	11.2413		11.2413	-177.411	-183.435
2012-12-20 08:58:40	174.23	180.19	21.79	11.2483		11.2483	-177.604	-183.68
2012-12-20 09:08:40	174.37	180.39	21.81	11.2552		11.2552	-177.747	-183.884
2012-12-20 09:18:40	174.55	180.67	21.82	11.2622		11.2622	-177.931	-184.169
2012-12-20 09:28:40	174.75	180.87	21.82	11.2691	41263.4	11.2691	-178.135	-184.373
2012-12-20 09:38:40	174.93	181.16	21.83	11.276		11.276	-178.318	-184.669
2012-12-20 09:48:40	175.18	181.41	21.83	11.283		11.283	-178.573	-184.924
2012-12-20 09:58:40	175.39	181.62	21.83	11.2899		11.2899	-178.787	-185.138
2012-12-20 10:08:40	175.57	181.85	21.82	11.2969		11.2969	-178.97	-185.372
2012-12-20 10:18:40	175.78	182.04	21.82	11.3038		11.3038	-179.185	-185.566
2012-12-20 10:28:40	175.96	182.25	21.82	11.3108	41263.4	11.3108	-179.368	-185.78
2012-12-20 10:38:40	176.1	182.42	21.82	11.3177		11.3177	-179.511	-185.953
2012-12-20 10:48:40	176.26	182.55	21.84	11.3247		11.3247	-179.674	-186.086
2012-12-20 10:58:40	176.37	182.77	21.86	11.3316		11.3316	-179.786	-186.31
2012-12-20 11:08:40	176.51	182.95	21.88	11.3385		11.3385	-179.929	-186.493
2012-12-20 11:18:40	176.62	183.11	21.92	11.3455		11.3455	-180.041	-186.656
2012-12-20 11:28:40	176.73	183.31	21.95	11.3524	41263.5	11.3524	-180.153	-186.86
2012-12-20 11:38:40	175.73	183.17	21.99	11.3594		11.3594	-179.134	-186.718
2012-12-20 11:48:40	176.96	183.65	22.04	11.3663		11.3663	-180.387	-187.207
2012-12-20 11:58:40	177.02	183.87	22.11	11.3733		11.3733	-180.449	-187.431
2012-12-20 12:08:40	175.3	182.08	22.18	11.3802		11.3802	-178.695	-185.607
2012-12-20 12:18:40	177.2	184.03	22.35	11.3872		11.3872	-180.632	-187.594
2012-12-20 12:28:40	177.51	184.41	22.46	11.3941	41263.5	11.3941	-180.948	-187.982
2012-12-20 12:38:40	177.78	184.78	22.5	11.401		11.401	-181.223	-188.359
2012-12-20 12:48:40	178.05	185.07	22.52	11.408		11.408	-181.498	-188.654
2012-12-20 12:58:40	178.27	185.39	22.51	11.4149		11.4149	-181.723	-188.981
2012-12-20 13:08:40	178.53	185.68	22.49	11.4219		11.4219	-181.988	-189.276
2012-12-20 13:18:40	178.76	186	22.47	11.4288		11.4288	-182.222	-189.602
2012-12-20 13:28:40	179.05	186.31	22.44	11.4358	41263.6	11.4358	-182.518	-189.918
2012-12-20 13:38:40	178.99	186.48	22.41	11.4427		11.4427	-182.457	-190.092
2012-12-20 13:48:40	179.51	186.95	22.37	11.4497		11.4497	-182.987	-190.571
2012-12-20 13:58:40	179.74	187.23	22.34	11.4566		11.4566	-183.221	-190.856
2012-12-20 14:08:40	179.96	187.54	22.31	11.4635		11.4635	-183.445	-191.172
2012-12-20 14:18:40	180.19	187.84	22.28	11.4705		11.4705	-183.68	-191.478
2012-12-20 14:28:40	180.39	188.13	22.25	11.4774	41263.6	11.4774	-183.884	-191.774
2012-12-20 14:38:40	180.62	188.42	22.22	11.4844		11.4844	-184.118	-192.069
2012-12-20 14:48:40	180.82	188.52	22.19	11.4913		11.4913	-184.322	-192.171
2012-12-20 14:58:40	181.04	188.92	22.17	11.4983		11.4983	-184.546	-192.579
2012-12-20 15:08:40	181.25	189.24	22.15	11.5052		11.5052	-184.76	-192.905
2012-12-20 15:18:40	181.46	189.56	22.13	11.5122		11.5122	-184.975	-193.231
2012-12-20 15:28:40	181.66	189.8	22.11	11.5191	41263.6	11.5191	-185.178	-193.476
2012-12-20 15:38:40	181.85	190.11	22.09	11.526		11.526	-185.372	-193.792
2012-12-20 15:48:40	182.01	190.43	22.07	11.533		11.533	-185.535	-194.118
2012-12-20 15:58:40	182.24	190.69	22.06	11.5399		11.5399	-185.77	-194.383
2012-12-20 16:08:40	182.4	190.99	22.04	11.5469		11.5469	-185.933	-194.689
2012-12-20 16:18:40	182.61	191.29	22.02	11.5538		11.5538	-186.147	-194.995
2012-12-20 16:28:40	182.81	191.56	22.01	11.5608	41263.7	11.5608	-186.351	-195.27
2012-12-20 16:38:40	183.03	191.82	21.99	11.5677		11.5677	-186.575	-195.535
2012-12-20 16:48:40	183.23	192.05	21.98	11.5747		11.5747	-186.779	-195.77
2012-12-20 16:58:40	183.41	192.38	21.97	11.5816		11.5816	-186.962	-196.106
2012-12-20 17:08:40	183.62	192.67	21.95	11.5885		11.5885	-187.176	-196.402
2012-12-20 17:18:40	183.76	192.88	21.94	11.5955		11.5955	-187.319	-196.616
2012-12-20 17:28:40	182.8	192.37	21.91	11.6024	41263.7	11.6024	-186.34	-196.096
2012-12-20 17:38:40	184.15	193.38	21.92	11.6094		11.6094	-187.717	-197.125
2012-12-20 17:48:40	184.38	193.6	21.91	11.6163		11.6163	-187.951	-197.35
2012-12-20 17:58:40	184.61	193.93	21.91	11.6233		11.6233	-188.186	-197.686
2012-12-20 18:08:40	184.77	194.17	21.9	11.6302		11.6302	-188.349	-197.931
2012-12-20 18:18:40	185	194.47	21.89	11.6372		11.6372	-188.583	-198.236
2012-12-20 18:28:40	185.19	194.73	21.88	11.6441	41263.8	11.6441	-188.777	-198.502
2012-12-20 18:38:40	185.37	195.02	21.86	11.651		11.651	-188.96	-198.797
2012-12-20 18:48:40	185.56	195.2	21.85	11.658		11.658	-189.154	-198.981
2012-12-20 18:58:40	185.77	195.49	21.84	11.6649		11.6649	-189.368	-199.276
2012-12-20 19:08:40	185.96	195.77	21.83	11.6719		11.6719	-189.562	-199.562
2012-12-20 19:18:40	186.14	195.98	21.81	11.6788		11.6788	-189.745	-199.776
2012-12-20 19:28:40	186.35	196.28	21.8	11.6858	41263.8	11.6858	-189.959	-200.082
2012-12-20 19:38:40	186.54	196.57	21.79	11.6927		11.6927	-190.153	-200.377
2012-12-20 19:48:40	186.72	196.76	21.78	11.6997		11.6997	-190.336	-200.571
2012-12-20 19:58:40	186.95	197.05	21.76	11.7066		11.7066	-190.571	-200.866
2012-12-20 20:08:40	187.15	197.36	21.75	11.7135		11.7135	-190.775	-201.182
2012-12-20 20:18:40	187.32	197.64	21.73	11.7205		11.7205	-190.948	-201.468
2012-12-20 20:28:40	187.53	197.92	21.72	11.7274	41263.9	11.7274	-191.162	-201.753
2012-12-20 20:38:40	187.69	198.19	21.7	11.7344		11.7344	-191.325	-202.029
2012-12-20 20:48:40	187.92	198.44	21.69	11.7413		11.7413	-191.56	-202.283
2012-12-20 20:58:40	188.09	198.71	21.67	11.7483		11.7483	-191.733	-202.559
2012-12-20 21:08:40	188.24	198.88	21.66	11.7552		11.7552	-191.886	-202.732
2012-12-20 21:18:40	188.41	199.16	21.65	11.7622		11.7622	-192.059	-203.017
2012-12-20 21:28:40	188.64	199.44	21.64	11.7691	41263.9	11.7691	-192.294	-203.303
2012-12-20 21:38:40	188.81	199.67	21.62	11.776		11.776	-192.467	-203.537
2012-12-20 21:48:40	189	199.78	21.61	11.783		11.783	-192.661	-203.649
2012-12-20 21:58:40	189.2	200.18	21.6	11.7899		11.7899	-192.864	-204.057
2012-12-20 22:08:40	189.39	200.46	21.59	11.7969		11.7969	-193.058	-204.343
2012-12-20 22:18:40	189.58	200.74	21.58	11.8038		11.8038	-193.252	-204.628
2012-12-20 22:28:40	189.74	200.93	21.57	11.8108	41263.9	11.8108	-193.415	-204.822
2012-12-20 22:38:40	189.68	201.28	21.56	11.8177		11.8177	-193.354	-205.178
2012-12-20 22:48:40	190.09	201.53	21.55	11.8247		11.8247	-193.772	-205.433
2012-12-20 22:58:40	190.27	201.73	21.54	11.8316		11.8316	-193.955	-205.637
2012-12-20 23:08:40	190.48	202.03	21.54	11.8385		11.8385	-194.169	-205.943
2012-12-20 23:18:40	190.66	202.3	21.53	11.8455		11.8455	-194.353	-206.218
2012-12-20 23:28:40	190.88	202.59	21.52	11.8524	41264	11.8524	-194.577	-206.514
2012-12-20 23:38:40	191.05	202.87	21.51	11.8594		11.8594	-194.75	-206.799
2012-12-20 23:48:40	191.22	203.14	21.5	11.8663		11.8663	-194.924	-207.074
2012-12-20 23:58:40	191.4	203.38	21.49	11.8733		11.8733	-195.107	-207.319
2012-12-21 00:08:40	191.62	203.69	21.49	11.8802		11.8802	-195.331	-207.635
2012-12-21 00:18:40	191.77	203.93	21.48	11.8872		11.8872	-195.484	-207.88
2012-12-21 00:28:40	191.98	204.25	21.47	11.8941	41264	11.8941	-195.698	-208.206
2012-12-21 00:38:40	192.14	204.47	21.47	11.901		11.901	-195.861	-208.43
2012-12-21 00:48:40	192.35	204.76	21.46	11.908		11.908	-196.075	-208.726
2012-12-21 00:58:40	192.52	205.07	21.45	11.9149		11.9149	-196.249	-209.042
2012-12-21 01:08:40	192.63	205.28	21.45	11.9219		11.9219	-196.361	-209.256
2012-12-21 01:18:40	192.9	205.59	21.44	11.9288		11.9288	-196.636	-209.572
2012-12-21 01:28:40	193.06	205.88	21.44	11.9358	41264.1	11.9358	-196.799	-209.867
2012-12-21 01:38:40	193.26	206.04	21.43	11.9427		11.9427	-197.003	-210.031
2012-12-21 01:48:40	193.47	206.45	21.43	11.9497		11.9497	-197.217	-210.449
2012-12-21 01:58:40	193.64	206.75	21.42	11.9566		11.9566	-197.39	-210.754
2012-12-21 02:08:40	193.84	207.03	21.42	11.9635		11.9635	-197.594	-211.04
2012-12-21 02:18:40	194.04	207.31	21.42	11.9705		11.9705	-197.798	-211.325
2012-12-21 02:28:40	194.18	207.59	21.41	11.9774	41264.1	11.9774	-197.941	-211.611
2012-12-21 02:38:40	194.4	207.88	21.41	11.9844		11.9844	-198.165	-211.906
2012-12-21 02:48:40	194.51	208.17	21.4	11.9913		11.9913	-198.277	-212.202
2012-12-21 02:58:40	194.74	208.4	21.4	11.9983		11.9983	-198.512	-212.436
2012-12-21 03:08:40	194.93	208.72	21.4	12.0052		12.0052	-198.705	-212.762
2012-12-21 03:18:40	195.12	208.92	21.4	12.0122		12.0122	-198.899	-212.966
2012-12-21 03:28:40	195.3	209.24	21.39	12.0191	41264.1	12.0191	-199.083	-213.293
2012-12-21 03:38:40	195.51	209.51	21.39	12.026		12.026	-199.297	-213.568
2012-12-21 03:48:40	195.65	209.8	21.39	12.033		12.033	-199.439	-213.863
2012-12-21 03:58:40	195.83	210.11	21.38	12.0399		12.0399	-199.623	-214.179
2012-12-21 04:08:40	196.04	210.34	21.38	12.0469		12.0469	-199.837	-214.414
2012-12-21 04:18:40	196.2	210.63	21.38	12.0538		12.0538	-200	-214.709
2012-12-21 04:28:40	196.45	210.96	21.37	12.0608	41264.2	12.0608	-200.255	-215.046
2012-12-21 04:38:40	196.65	211.21	21.37	12.0677		12.0677	-200.459	-215.301
2012-12-21 04:48:40	196.83	211.53	21.36	12.0747		12.0747	-200.642	-215.627
2012-12-21 04:58:40	197	211.75	21.36	12.0816		12.0816	-200.815	-215.851
2012-12-21 05:08:40	197.22	212.02	21.36	12.0885		12.0885	-201.04	-216.126
2012-12-21 05:18:40	197.33	212.32	21.35	12.0955		12.0955	-201.152	-216.432
2012-12-21 05:28:40	197.55	212.69	21.35	12.1024	41264.2	12.1024	-201.376	-216.809
2012-12-21 05:38:40	197.76	213.02	21.34	12.1094		12.1094	-201.59	-217.146
2012-12-21 05:48:40	197.98	213.32	21.34	12.1163		12.1163	-201.814	-217.452
2012-12-21 05:58:40	198.13	213.65	21.34	12.1233		12.1233	-201.967	-217.788
2012-12-21 06:08:40	198.34	213.82	21.33	12.1302		12.1302	-202.181	-217.961
2012-12-21 06:18:40	198.55	214.21	21.33	12.1372		12.1372	-202.396	-218.359
2012-12-21 06:28:40	198.67	214.5	21.33	12.1441	41264.3	12.1441	-202.518	-218.654
2012-12-21 06:38:40	198.87	214.7	21.32	12.151		12.151	-202.722	-218.858
2012-12-21 06:48:40	199.11	215.01	21.32	12.158		12.158	-202.966	-219.174
2012-12-21 06:58:40	199.33	215.34	21.32	12.1649		12.1649	-203.191	-219.511
2012-12-21 07:08:40	199.52	215.7	21.31	12.1719		12.1719	-203.384	-219.878
2012-12-21 07:18:40	199.7	216.02	21.31	12.1788		12.1788	-203.568	-220.204
2012-12-21 07:28:40	199.85	216.38	21.31	12.1858	41264.3	12.1858	-203.721	-220.571
2012-12-21 07:38:40	200.09	216.66	21.31	12.1927		12.1927	-203.965	-220.856
2012-12-21 07:48:40	200.28	216.9	21.31	12.1997		12.1997	-204.159	-221.101
2012-12-21 07:58:40	200.41	217.2	21.32	12.2066		12.2066	-204.292	-221.407
2012-12-21 08:08:40	200.61	217.4	21.32	12.2135		12.2135	-204.495	-221.611
2012-12-21 08:18:40	192.79	211.76	21.32	12.2205		12.2205	-196.524	-215.861
2012-12-21 08:28:40	201.23	217.41	21.36	12.2274	41264.4	12.2274	-205.127	-221.621
2012-12-21 08:38:40	201.82	217.95	21.4	12.2344		12.2344	-205.729	-222.171
2012-12-21 08:48:40	202.11	218.35	21.43	12.2413		12.2413	-206.024	-222.579
2012-12-21 08:58:40	202.33	218.68	21.45	12.2483		12.2483	-206.249	-222.915
2012-12-21 09:08:40	202.61	219.03	21.47	12.2552		12.2552	-206.534	-223.272
2012-12-21 09:18:40	202.84	219.36	21.48	12.2622		12.2622	-206.769	-223.609
2012-12-21 09:28:40	203.04	219.46	21.49	12.2691	41264.4	12.2691	-206.972	-223.71
2012-12-21 09:38:40	203.2	219.97	21.49	12.276		12.276	-207.136	-224.23
2012-12-21 09:48:40	203.48	220.26	21.5	12.283		12.283	-207.421	-224.526
2012-12-21 09:58:40	203.77	220.31	21.5	12.2899		12.2899	-207.717	-224.577
2012-12-21 10:08:40	203.97	220.81	21.5	12.2969		12.2969	-207.92	-225.087
2012-12-21 10:18:40	204.2	221.21	21.5	12.3038		12.3038	-208.155	-225.494
2012-12-21 10:28:40	204.4	221.48	21.5	12.3108	41264.4	12.3108	-208.359	-225.77
2012-12-21 10:38:40	204.63	221.89	21.5	12.3177		12.3177	-208.593	-226.188
2012-12-21 10:48:40	204.81	222.22	21.5	12.3247		12.3247	-208.777	-226.524
2012-12-21 10:58:40	205.01	222.56	21.5	12.3316		12.3316	-208.981	-226.871
2012-12-21 11:08:40	205.19	222.85	21.5	12.3385		12.3385	-209.164	-227.166
2012-12-21 11:18:40	205.47	223.23	21.5	12.3455		12.3455	-209.45	-227.554
2012-12-21 11:28:40	205.7	223.52	21.49	12.3524	41264.5	12.3524	-209.684	-227.849
2012-12-21 11:38:40	205.9	223.87	21.5	12.3594		12.3594	-209.888	-228.206
2012-12-21 11:48:40	206.11	224.19	21.5	12.3663		12.3663	-210.102	-228.532
2012-12-21 11:58:40	206.3	224.45	21.5	12.3733		12.3733	-210.296	-228.797
2012-12-21 12:08:40	206.41	224.9	21.5	12.3802		12.3802	-210.408	-229.256
2012-12-21 12:18:40	206.73	225.12	21.5	12.3872		12.3872	-210.734	-229.48
2012-12-21 12:28:40	206.94	225.53	21.51	12.3941	41264.5	12.3941	-210.948	-229.898
2012-12-21 12:38:40	207.18	225.89	21.51	12.401		12.401	-211.193	-230.265
2012-12-21 12:48:40	207.39	226.22	21.51	12.408		12.408	-211.407	-230.601
2012-12-21 12:58:40	207.58	226.55	21.51	12.4149		12.4149	-211.6	-230.938
2012-12-21 13:08:40	207.87	226.89	21.52	12.4219		12.4219	-211.896	-231.284
2012-12-21 13:18:40	208.07	227.23	21.52	12.4288		12.4288	-212.1	-231.631
2012-12-21 13:28:40	208.26	227.58	21.52	12.4358	41264.6	12.4358	-212.294	-231.988
2012-12-21 13:38:40	208.46	227.97	21.52	12.4427		12.4427	-212.497	-232.385
2012-12-21 13:48:40	208.73	228.32	21.53	12.4497		12.4497	-212.773	-232.742
2012-12-21 13:58:40	208.89	228.61	21.53	12.4566		12.4566	-212.936	-233.038
2012-12-21 14:08:40	209.19	228.93	21.53	12.4635		12.4635	-213.242	-233.364
2012-12-21 14:18:40	209.41	229.26	21.53	12.4705		12.4705	-213.466	-233.7
2012-12-21 14:28:40	209.64	229.7	21.53	12.4774	41264.6	12.4774	-213.7	-234.149
2012-12-21 14:38:40	209.77	230.01	21.53	12.4844		12.4844	-213.833	-234.465
2012-12-21 14:48:40	210.06	230.46	21.53	12.4913		12.4913	-214.128	-234.924
2012-12-21 14:58:40	210.31	230.82	21.53	12.4983		12.4983	-214.383	-235.291
2012-12-21 15:08:40	210.52	231.2	21.53	12.5052		12.5052	-214.597	-235.678
2012-12-21 15:18:40	210.75	231.55	21.53	12.5122		12.5122	-214.832	-236.035
2012-12-21 15:28:40	210.99	231.99	21.53	12.5191	41264.6	12.5191	-215.076	-236.483
2012-12-21 15:38:40	211.28	232.35	21.53	12.526		12.526	-215.372	-236.85
2012-12-21 15:48:40	211.52	232.68	21.52	12.533		12.533	-215.617	-237.187
2012-12-21 15:58:40	211.78	233.05	21.52	12.5399		12.5399	-215.882	-237.564
2012-12-21 16:08:40	211.96	233.43	21.52	12.5469		12.5469	-216.065	-237.951
2012-12-21 16:18:40	212.23	233.74	21.51	12.5538		12.5538	-216.34	-238.267
2012-12-21 16:28:40	212.51	234.17	21.51	12.5608	41264.7	12.5608	-216.626	-238.705
2012-12-21 16:38:40	212.66	234.53	21.5	12.5677		12.5677	-216.779	-239.072
2012-12-21 16:48:40	212.96	234.94	21.5	12.5747		12.5747	-217.085	-239.49
2012-12-21 16:58:40	213.2	235.37	21.5	12.5816		12.5816	-217.329	-239.929
2012-12-21 17:08:40	213.46	235.75	21.51	12.5885		12.5885	-217.594	-240.316
2012-12-21 17:18:40	213.68	236.15	21.52	12.5955		12.5955	-217.819	-240.724
2012-12-21 17:28:40	213.93	236.63	21.52	12.6024	41264.7	12.6024	-218.073	-241.213
2012-12-21 17:38:40	214.23	237.03	21.52	12.6094		12.6094	-218.379	-241.621
2012-12-21 17:48:40	214.51	237.19	21.52	12.6163		12.6163	-218.665	-241.784
2012-12-21 17:58:40	214.72	237.84	21.51	12.6233		12.6233	-218.879	-242.446
2012-12-21 18:08:40	215.03	238.23	21.51	12.6302		12.6302	-219.195	-242.844
2012-12-21 18:18:40	215.24	238.64	21.5	12.6372		12.6372	-219.409	-243.262
2012-12-21 18:28:40	215.49	239.05	21.5	12.6441	41264.8	12.6441	-219.664	-243.68
2012-12-21 18:38:40	214.3	237.9	21.51	12.651		12.651	-218.451	-242.508
2012-12-21 18:48:40	215.73	239.34	21.55	12.658		12.658	-219.908	-243.976
2012-12-21 18:58:40	216.22	240.03	21.56	12.6649		12.6649	-220.408	-244.679
2012-12-21 19:08:40	216.53	240.54	21.55	12.6719		12.6719	-220.724	-245.199
2012-12-21 19:18:40	216.85	240.77	21.55	12.6788		12.6788	-221.05	-245.433
2012-12-21 19:28:40	217.09	241.43	21.53	12.6858	41264.8	12.6858	-221.295	-246.106
2012-12-21 19:38:40	217.45	241.88	21.52	12.6927		12.6927	-221.662	-246.565
2012-12-21 19:48:40	217.75	242.41	21.51	12.6997		12.6997	-221.967	-247.105
2012-12-21 19:58:40	218.03	242.86	21.5	12.7066		12.7066	-222.253	-247.564
2012-12-21 20:08:40	218.29	243.34	21.49	12.7135		12.7135	-222.518	-248.053
2012-12-21 20:18:40	218.59	243.82	21.49	12.7205		12.7205	-222.824	-248.542
2012-12-21 20:28:40	218.89	244.24	21.48	12.7274	41264.9	12.7274	-223.129	-248.97
2012-12-21 20:38:40	218.83	244.63	21.47	12.7344		12.7344	-223.068	-249.368
2012-12-21 20:48:40	219.31	245.09	21.46	12.7413		12.7413	-223.558	-249.837
2012-12-21 20:58:40	219.61	245.48	21.45	12.7483		12.7483	-223.863	-250.234
2012-12-21 21:08:40	219.81	245.92	21.44	12.7552		12.7552	-224.067	-250.683
[truncated: 1,392 more rows]

## Sheet: Tensi
Zeit [d]	MP bot(2) [cm]	MP top(1) [cm]		air entry bot		AE time	AE [cm]	Type	Pos	Weight
0.00692455	-4.44444	-7.04383		2012-12-29 22:18:40	8800	20.8038	-8970.44	1	2	1
0.0485912	-4.90316	-7.50255
0.0902579	-5.59633	-8.20591		air entry top
0.131925	-6.42202	-9.02141		Time		AE time	AE [cm]	Type	Pos	Weight
0.173591	-7.17635	-9.77574		2012-12-27 00:28:40	8800	17.8941	-8970.44	1	1	1
0.215258	-7.78797	-10.3976
0.256925	-8.20591	-10.8155
0.298591	-8.59327	-11.1927
0.340258	-8.99083	-11.6106
0.381925	-8.98063	-11.5698
0.430536	-9.72477	-12.314
0.472202	-9.92864	-12.4975
0.520813	-10.5403	-13.0989
0.56248	-10.9276	-13.5168
0.604147	-11.0601	-13.578
0.645813	-11.6208	-14.1081
0.68748	-12.0897	-14.6075
0.729147	-12.3853	-14.893
0.770813	-12.7115	-15.2294
0.81248	-13.0785	-15.6065
0.854147	-13.4149	-15.9225
0.895813	-13.792	-16.2895
0.93748	-14.0469	-16.5545
0.979147	-14.4444	-16.9419
1.02081	-14.7197	-17.2375
1.06248	-15.1172	-17.6249
1.10415	-15.3721	-17.8797
1.14581	-15.739	-18.2467
1.18748	-16.0856	-18.5729
1.22915	-16.2589	-18.7462
1.27081	-16.2283	-18.7258
1.31248	-16.7482	-19.2457
1.35415	-16.9419	-19.4088
1.39581	-17.1967	-19.6636
1.42327	-17.4006	-19.8573
1.42744	-17.3802	-19.8471
1.4316	-17.3496	-19.8267
1.43577	-17.3904	-19.8573
1.43994	-17.4414	-19.9083
1.4441	-17.4822	-19.949
1.44827	-17.5025	-19.9898
1.45244	-17.5127	-19.9898
1.4566	-17.5739	-20.0408
1.46077	-17.5841	-20.051
1.47744	-17.6758	-20.1427
1.5191	-17.9205	-20.367
1.56077	-18.002	-20.4995
1.60244	-18.2977	-20.7849
1.6441	-18.1855	-20.7238
1.68577	-18.6442	-21.1825
1.72744	-18.9704	-21.5087
1.7691	-19.1947	-21.7533
1.81077	-19.4597	-22.0285
1.85244	-19.7554	-22.2732
1.8941	-19.9592	-22.4669
1.93577	-20.1529	-22.6606
1.97744	-20.4383	-22.946
2.0191	-20.683	-23.2008
2.06077	-20.8869	-23.3945
2.10244	-21.0703	-23.5882
2.1441	-21.264	-23.7717
2.18577	-21.4883	-24.0061
2.22744	-21.682	-24.1998
2.2691	-21.896	-24.4139
2.31077	-22.0489	-24.5668
2.35244	-22.2222	-24.7401
2.3941	-22.263	-24.7808
2.43577	-22.5688	-25.0968
2.47744	-22.844	-25.3517
2.5191	-23.0683	-25.5963
2.56077	-23.2926	-25.8104
2.60244	-23.0479	-25.5861
2.6441	-23.5066	-26.0347
2.68577	-23.792	-26.3099
2.72744	-23.7819	-26.2793
2.7691	-23.9551	-26.4424
2.81077	-24.21	-26.7074
2.85244	-24.3833	-26.8807
2.8941	-24.5668	-27.0948
2.93577	-24.7604	-27.2681
2.97744	-24.9847	-27.4924
3.0191	-25.1376	-27.6555
3.06077	-25.4434	-27.9511
3.10244	-25.6371	-28.1448
3.1441	-25.739	-28.2467
3.18577	-25.9633	-28.4811
3.22744	-26.0754	-28.5933
3.2691	-25.7288	-28.2773
3.31077	-26.524	-29.0826
3.35244	-26.7482	-29.2762
3.3941	-26.9011	-29.419
3.43577	-27.0846	-29.6228
3.47744	-27.2171	-29.735
3.5191	-27.4516	-29.9592
3.56077	-27.6453	-30.1631
3.60244	-27.8287	-30.3466
3.6441	-28.0122	-30.5301
3.68577	-28.2875	-30.8155
3.72744	-28.5015	-31.0296
3.7691	-28.6952	-31.2232
3.81077	-28.8991	-31.4373
3.85244	-29.0622	-31.6004
3.8941	-29.2966	-31.8349
3.93577	-29.5311	-32.0795
3.97744	-29.7146	-32.2732
4.0191	-29.8777	-32.4363
4.06077	-30.0714	-32.63
4.10244	-30.3262	-32.8746
4.1441	-30.5607	-33.0887
4.18577	-30.7339	-33.2926
4.22744	-30.999	-33.5474
4.2691	-31.2436	-33.792
4.31077	-31.366	-33.9042
4.35244	-31.6208	-34.1488
4.3941	-31.8451	-34.3833
4.43577	-31.896	-34.3935
4.47744	-32.1101	-34.5973
4.5191	-32.1814	-34.6177
4.56077	-32.4975	-34.9337
4.60244	-32.8542	-35.3007
4.6441	-33.211	-35.6881
4.68577	-33.5474	-36.0041
4.72744	-33.9042	-36.3914
4.7691	-34.2406	-36.738
4.81077	-34.4546	-37.0234
4.85244	-34.9337	-37.5127
4.8941	-35.2905	-37.8593
4.93577	-35.6371	-38.2059
4.97744	-35.9633	-38.5423
5.0191	-36.1264	-38.6544
5.06077	-36.4424	-38.9806
5.10244	-36.8298	-39.3476
5.1441	-37.1152	-39.6432
5.18577	-37.4516	-39.9796
5.22744	-37.6758	-40.1835
5.2691	-37.7676	-40.3466
5.31077	-38.369	-40.9174
5.35244	-38.6646	-41.2232
5.3941	-38.9704	-41.5087
5.43577	-39.2661	-41.7839
5.47744	-39.5413	-42.0795
5.5191	-39.8777	-42.4057
5.56077	-40.2243	-42.7829
5.60244	-40.6422	-43.1702
5.6441	-41.0296	-43.5474
5.68577	-41.2232	-43.7513
5.72744	-41.6208	-44.0877
5.7691	-42.1203	-44.6075
5.81077	-42.3649	-44.8114
5.85244	-42.8033	-45.2497
5.8941	-43.2824	-45.739
5.93577	-43.7003	-46.1774
5.97744	-44.1488	-46.6157
6.0191	-44.5973	-47.0744
6.06077	-44.9847	-47.4516
6.10244	-45.4128	-47.8695
6.1441	-45.8614	-48.3282
6.18577	-46.208	-48.736
6.22744	-46.6769	-49.1233
6.2691	-47.0438	-49.4801
6.31077	-47.4822	-49.9083
6.35244	-47.8389	-50.2752
6.3941	-48.3384	-50.8563
6.43577	-48.7971	-51.3048
6.47744	-49.2355	-51.7431
6.5191	-49.6432	-52.2018
6.56077	-50.1733	-52.6809
6.60244	-50.6422	-53.1498
6.6441	-51.1417	-53.6493
6.68577	-51.6616	-54.1896
6.72744	-52.2222	-54.7401
6.7691	-52.7829	-55.3007
6.81077	-53.3333	-55.8614
6.85244	-53.9246	-56.4322
6.8941	-54.4546	-56.9827
6.93577	-55.0357	-57.5841
6.97744	-55.6269	-58.1753
7.0191	-56.2283	-58.7666
7.06077	-56.8807	-59.4292
7.10244	-57.4618	-60.0306
7.1441	-58.0836	-60.6626
7.18577	-58.7971	-61.3456
7.22744	-59.3884	-61.947
7.2691	-60.0815	-62.6198
7.31077	-60.6932	-63.2518
7.35244	-61.3558	-63.9042
7.3941	-62.0285	-64.577
7.43577	-62.6911	-65.2497
7.47744	-63.3945	-65.9735
7.5191	-63.9144	-66.4526
7.56077	-64.7808	-67.3191
7.60244	-65.6065	-68.1346
7.6441	-66.4628	-69.001
7.68577	-67.3293	-69.8675
7.72744	-68.2263	-70.7543
7.7691	-69.1539	-71.6922
7.81077	-70.0815	-72.6198
7.85244	-70.999	-73.5678
7.8941	-71.9368	-74.4954
7.93577	-72.844	-75.4128
7.97744	-73.8022	-76.4016
8.0191	-74.7197	-77.3293
8.06077	-75.6983	-78.2875
8.10244	-76.6157	-79.2049
8.1441	-77.5331	-80.1121
8.18577	-78.4404	-81.1621
8.22744	-79.6126	-82.212
8.2691	-80.5607	-83.16
8.31077	-81.5189	-84.1386
8.35244	-82.5484	-85.0765
8.3941	-83.4455	-85.9735
8.43577	-84.5973	-87.156
8.47744	-85.739	-88.2875
8.5191	-86.7584	-89.3476
8.56077	-87.9409	-90.5097
8.60244	-89.1335	-91.7431
8.6441	-90.2854	-92.8848
8.68577	-91.4883	-94.1284
8.72744	-92.7727	-95.4332
8.7691	-94.0265	-96.7074
8.81077	-95.3007	-98.002
8.85244	-96.5749	-99.2966
8.8941	-97.8287	-100.54
8.93577	-99.1335	-101.876
8.97744	-100.489	-103.242
9.0191	-101.845	-104.618
9.06077	-103.18	-105.943
9.10244	-104.506	-107.319
9.1441	-105.892	-108.705
9.18577	-107.288	-110.133
9.22744	-107.92	-111.091
9.2691	-109.98	-112.793
9.31077	-111.295	-114.108
9.35244	-112.65	-115.474
9.3941	-114.057	-116.901
9.43577	-115.505	-118.369
9.47744	-116.972	-119.817
9.5191	-118.41	-121.346
9.56077	-119.969	-122.915
9.60244	-121.549	-124.22
9.6441	-123.028	-125.688
9.68577	-124.597	-127.299
9.72744	-126.116	-128.797
9.7691	-127.666	-130.418
9.81077	-129.235	-131.978
9.85244	-130.826	-133.639
9.8941	-132.406	-135.27
9.93577	-134.016	-136.922
9.97744	-135.637	-138.573
10.0191	-137.238	-140.173
10.0608	-138.858	-141.784
10.1024	-140.418	-143.466
10.1441	-142.069	-145.107
10.1858	-143.639	-146.84
10.2274	-145.219	-148.43
10.2691	-146.677	-150.031
10.3108	-148.226	-151.641
10.3524	-149.766	-153.201
10.3941	-151.325	-154.811
10.4358	-152.803	-156.361
10.4774	-154.292	-157.931
10.5191	-155.719	-159.45
10.5608	-157.095	-160.907
10.6024	-158.512	-162.161
10.6441	-159.898	-163.588
10.6858	-161.254	-165.066
10.7274	-162.63	-166.544
10.7691	-164.037	-168.043
10.8108	-165.392	-169.48
10.8524	-166.656	-170.826
10.8941	-167.798	-172.13
10.9358	-169.042	-173.527
10.9774	-170.234	-174.913
11.0191	-171.427	-176.239
11.0608	-172.62	-177.594
11.1024	-173.772	-178.94
11.1441	-174.924	-180.275
11.1858	-176.055	-181.682
11.2274	-175.923	-182.589
11.2691	-178.135	-184.373
11.3108	-179.368	-185.78
11.3524	-180.153	-186.86
11.3941	-180.948	-187.982
11.4358	-182.518	-189.918
11.4774	-183.884	-191.774
11.5191	-185.178	-193.476
11.5608	-186.351	-195.27
11.6024	-186.34	-196.096
11.6441	-188.777	-198.502
11.6858	-189.959	-200.082
11.7274	-191.162	-201.753
11.7691	-192.294	-203.303
11.8108	-193.415	-204.822
11.8524	-194.577	-206.514
11.8941	-195.698	-208.206
11.9358	-196.799	-209.867
11.9774	-197.941	-211.611
12.0191	-199.083	-213.293
12.0608	-200.255	-215.046
12.1024	-201.376	-216.809
12.1441	-202.518	-218.654
12.1858	-203.721	-220.571
12.2274	-205.127	-221.621
12.2691	-206.972	-223.71
12.3108	-208.359	-225.77
12.3524	-209.684	-227.849
12.3941	-210.948	-229.898
12.4358	-212.294	-231.988
12.4774	-213.7	-234.149
12.5191	-215.076	-236.483
12.5608	-216.626	-238.705
12.6024	-218.073	-241.213
12.6441	-219.664	-243.68
12.6858	-221.295	-246.106
12.7274	-223.129	-248.97
12.7691	-224.771	-251.498
12.8108	-226.402	-254.343
12.8524	-228.196	-257.115
12.8941	-229.918	-260.163
12.9358	-231.662	-263.242
12.9774	-233.527	-266.473
13.0191	-235.403	-269.643
13.0608	-237.258	-273.282
13.1024	-239.307	-276.891
13.1441	-241.366	-280.765
13.1858	-243.242	-284.343
13.2274	-245.525	-288.777
13.2691	-247.829	-293.15
13.3108	-250.112	-297.105
13.3524	-252.406	-302.008
13.3941	-254.822	-306.758
13.4358	-257.146	-311.611
13.4774	-259.827	-316.83
13.5191	-262.446	-321.774
13.5608	-265.127	-327.074
13.6024	-268.094	-332.762
13.6441	-271.203	-338.767
13.6858	-271.611	-340.163
13.7274	-278.573	-351.254
13.7691	-282.202	-359.185
13.8108	-285.912	-366.911
13.8524	-289.725	-374.292
13.8941	-293.588	-381.651
13.9358	-297.594	-390.245
13.9774	-301.692	-398.461
14.0191	-306.045	-406.697
14.0608	-310.642	-415.515
14.1024	-315.199	-424.822
14.1441	-319.49	-434.444
14.1858	-324.913	-444.781
14.2274	-329.796	-452.334
14.2691	-336.534	-458.135
14.3108	-344.975	-472.895
14.3524	-351.896	-485.545
14.3941	-358.328	-497.268
14.4358	-364.903	-508.909
14.4774	-371.213	-520.968
14.5191	-377.625	-534.322
14.5608	-385.556	-547.971
14.6024	-393.109	-560.683
14.6441	-399.674	-574.75
14.6858	-408.022	-590.194
14.7274	-416.565	-604.271
14.7691	-424.985	-619.653
14.8108	-433.986	-635.087
14.8524	-443.802	-651.305
14.8941	-453.415	-667.92
14.9358	-464.434	-687.146
14.9774	-475.403	-704.699
15.0191	-486.616	-724.526
15.0608	-497.737	-745.076
15.1024	-509.623	-766.789
15.1441	-520.948	-788.644
15.1788	-531.784	-806.85
15.2274	-547.564
15.2691	-561.162

## Sheet: HYDRUS
Data für die Zielfunktion: 2 x Tensionen, 1 x Endwassergehalt						Verdunstungsrate
Time	Obs	Type	Pos	Weight		Zeitintervall		Evarate [cm/d]	hCritA [cm]		Type	1-Tension	2-Wassergehalt
0.00692455	-4.44444	1	2	1		0.370553	0.158338	0.427302	100000		Pos	1-top	2-bot	(von oben nach unten)
0.0485912	-4.90316	1	2	1		0.698912	0.122494	0.373049	100000		34	Time-Variable boundary conditions+
0.0902579	-5.59633	1	2	1		1.26627	0.182237	0.321205	100000		22.391	Final Time	Time Information
0.131925	-6.42202	1	2	1		1.61148	0.102847	0.297927	100000		786	Inverse Data Points
0.173591	-7.17635	1	2	1		1.8407	0.0647554	0.282493	100000		56.7822	BC-top	[hPa]
0.215258	-7.78797	1	2	1		2.37131	0.15437	0.29093	100000		58.0322	tens_top_ini	[hPa]	1
0.256925	-8.20591	1	2	1		2.60386	0.0753809	0.324158	100000		121.309	tens_bot_ini	[hPa]	2
0.298591	-8.59327	1	2	1		3.26641	0.226343	0.341621	100000		122.559	BC-bot	[hPa]
0.340258	-8.99083	1	2	1		3.60299	0.111468	0.331183	100000
0.381925	-8.98063	1	2	1		4.2891	0.214916	0.313238	100000		-8.15112
0.430536	-9.72477	1	2	1		4.79132	0.168404	0.335317	100000		-6.90112
0.472202	-9.92864	1	2	1		5.26535	0.157578	0.332427	100000		-4.28135
0.520813	-10.5403	1	2	1		5.70988	0.135525	0.30487	100000		-3.03135
0.56248	-10.9276	1	2	1		6.36462	0.192061	0.293338	100000
0.604147	-11.0601	1	2	1		7.48533	0.288693	0.257599	100000
0.645813	-11.6208	1	2	1		8.25202	0.196672	0.256522	100000
0.68748	-12.0897	1	2	1		9.22713	0.237771	0.243838	100000
0.729147	-12.3853	1	2	1		9.56127	0.0747795	0.223799	100000
0.770813	-12.7115	1	2	1		10.2148	0.144547	0.221181	100000
0.81248	-13.0785	1	2	1		10.5711	0.0807939	0.226757	100000
0.854147	-13.4149	1	2	1		11.2258	0.142141	0.217124	100000
0.895813	-13.792	1	2	1		11.6	0.0934242	0.249656	100000
0.93748	-14.0469	1	2	1		12.2193	0.150361	0.242763	100000
0.979147	-14.4444	1	2	1		12.6447	0.107057	0.251667	100000
1.02081	-14.7197	1	2	1		13.2835	0.155373	0.243249	100000
1.06248	-15.1172	1	2	1		13.6786	0.0868083	0.219713	100000
1.10415	-15.3721	1	2	1		14.2414	0.112269	0.199476	100000
1.14581	-15.739	1	2	1		16.366	0.299719	0.141069	100000
1.18748	-16.0856	1	2	1		17.4867	0.10405	0.0928426	100000
1.22915	-16.2589	1	2	1		18.3768	0.0651564	0.0732067	100000
1.27081	-16.2283	1	2	1		18.6331	0.0166399	0.0649064	100000
1.31248	-16.7482	1	2	1		19.2795	0.0400962	0.0620326	100000
1.35415	-16.9419	1	2	1		20.2779	0.0531275	0.053214	100000
1.39581	-17.1967	1	2	1		22.391	0.0819968	0.0388189	100000
1.42327	-17.4006	1	2	1
1.42744	-17.3802	1	2	1
1.4316	-17.3496	1	2	1
1.43577	-17.3904	1	2	1
1.43994	-17.4414	1	2	1
1.4441	-17.4822	1	2	1
1.44827	-17.5025	1	2	1
1.45244	-17.5127	1	2	1
1.4566	-17.5739	1	2	1
1.46077	-17.5841	1	2	1
1.47744	-17.6758	1	2	1
1.5191	-17.9205	1	2	1
1.56077	-18.002	1	2	1
1.60244	-18.2977	1	2	1
1.6441	-18.1855	1	2	1
1.68577	-18.6442	1	2	1
1.72744	-18.9704	1	2	1
1.7691	-19.1947	1	2	1
1.81077	-19.4597	1	2	1
1.85244	-19.7554	1	2	1
1.8941	-19.9592	1	2	1
1.93577	-20.1529	1	2	1
1.97744	-20.4383	1	2	1
2.0191	-20.683	1	2	1
2.06077	-20.8869	1	2	1
2.10244	-21.0703	1	2	1
2.1441	-21.264	1	2	1
2.18577	-21.4883	1	2	1
2.22744	-21.682	1	2	1
2.2691	-21.896	1	2	1
2.31077	-22.0489	1	2	1
2.35244	-22.2222	1	2	1
2.3941	-22.263	1	2	1
2.43577	-22.5688	1	2	1
2.47744	-22.844	1	2	1
2.5191	-23.0683	1	2	1
2.56077	-23.2926	1	2	1
2.60244	-23.0479	1	2	1
2.6441	-23.5066	1	2	1
2.68577	-23.792	1	2	1
2.72744	-23.7819	1	2	1
2.7691	-23.9551	1	2	1
2.81077	-24.21	1	2	1
2.85244	-24.3833	1	2	1
2.8941	-24.5668	1	2	1
2.93577	-24.7604	1	2	1
2.97744	-24.9847	1	2	1
3.0191	-25.1376	1	2	1
3.06077	-25.4434	1	2	1
3.10244	-25.6371	1	2	1
3.1441	-25.739	1	2	1
3.18577	-25.9633	1	2	1
3.22744	-26.0754	1	2	1
3.2691	-25.7288	1	2	1
3.31077	-26.524	1	2	1
3.35244	-26.7482	1	2	1
3.3941	-26.9011	1	2	1
3.43577	-27.0846	1	2	1
3.47744	-27.2171	1	2	1
3.5191	-27.4516	1	2	1
3.56077	-27.6453	1	2	1
3.60244	-27.8287	1	2	1
3.6441	-28.0122	1	2	1
3.68577	-28.2875	1	2	1
3.72744	-28.5015	1	2	1
3.7691	-28.6952	1	2	1
3.81077	-28.8991	1	2	1
3.85244	-29.0622	1	2	1
3.8941	-29.2966	1	2	1
3.93577	-29.5311	1	2	1
3.97744	-29.7146	1	2	1
4.0191	-29.8777	1	2	1
4.06077	-30.0714	1	2	1
4.10244	-30.3262	1	2	1
4.1441	-30.5607	1	2	1
4.18577	-30.7339	1	2	1
4.22744	-30.999	1	2	1
4.2691	-31.2436	1	2	1
4.31077	-31.366	1	2	1
4.35244	-31.6208	1	2	1
4.3941	-31.8451	1	2	1
4.43577	-31.896	1	2	1
4.47744	-32.1101	1	2	1
4.5191	-32.1814	1	2	1
4.56077	-32.4975	1	2	1
4.60244	-32.8542	1	2	1
4.6441	-33.211	1	2	1
4.68577	-33.5474	1	2	1
4.72744	-33.9042	1	2	1
4.7691	-34.2406	1	2	1
4.81077	-34.4546	1	2	1
4.85244	-34.9337	1	2	1
4.8941	-35.2905	1	2	1
4.93577	-35.6371	1	2	1
4.97744	-35.9633	1	2	1
5.0191	-36.1264	1	2	1
5.06077	-36.4424	1	2	1
5.10244	-36.8298	1	2	1
5.1441	-37.1152	1	2	1
5.18577	-37.4516	1	2	1
5.22744	-37.6758	1	2	1
5.2691	-37.7676	1	2	1
5.31077	-38.369	1	2	1
5.35244	-38.6646	1	2	1
5.3941	-38.9704	1	2	1
5.43577	-39.2661	1	2	1
5.47744	-39.5413	1	2	1
5.5191	-39.8777	1	2	1
5.56077	-40.2243	1	2	1
5.60244	-40.6422	1	2	1
5.6441	-41.0296	1	2	1
5.68577	-41.2232	1	2	1
5.72744	-41.6208	1	2	1
5.7691	-42.1203	1	2	1
5.81077	-42.3649	1	2	1
5.85244	-42.8033	1	2	1
5.8941	-43.2824	1	2	1
5.93577	-43.7003	1	2	1
5.97744	-44.1488	1	2	1
6.0191	-44.5973	1	2	1
6.06077	-44.9847	1	2	1
6.10244	-45.4128	1	2	1
6.1441	-45.8614	1	2	1
6.18577	-46.208	1	2	1
6.22744	-46.6769	1	2	1
6.2691	-47.0438	1	2	1
6.31077	-47.4822	1	2	1
6.35244	-47.8389	1	2	1
6.3941	-48.3384	1	2	1
6.43577	-48.7971	1	2	1
6.47744	-49.2355	1	2	1
6.5191	-49.6432	1	2	1
6.56077	-50.1733	1	2	1
6.60244	-50.6422	1	2	1
6.6441	-51.1417	1	2	1
6.68577	-51.6616	1	2	1
6.72744	-52.2222	1	2	1
6.7691	-52.7829	1	2	1
6.81077	-53.3333	1	2	1
6.85244	-53.9246	1	2	1
6.8941	-54.4546	1	2	1
6.93577	-55.0357	1	2	1
6.97744	-55.6269	1	2	1
7.0191	-56.2283	1	2	1
7.06077	-56.8807	1	2	1
7.10244	-57.4618	1	2	1
7.1441	-58.0836	1	2	1
7.18577	-58.7971	1	2	1
7.22744	-59.3884	1	2	1
7.2691	-60.0815	1	2	1
7.31077	-60.6932	1	2	1
7.35244	-61.3558	1	2	1
7.3941	-62.0285	1	2	1
7.43577	-62.6911	1	2	1
7.47744	-63.3945	1	2	1
7.5191	-63.9144	1	2	1
7.56077	-64.7808	1	2	1
7.60244	-65.6065	1	2	1
7.6441	-66.4628	1	2	1
7.68577	-67.3293	1	2	1
7.72744	-68.2263	1	2	1
7.7691	-69.1539	1	2	1
7.81077	-70.0815	1	2	1
7.85244	-70.999	1	2	1
7.8941	-71.9368	1	2	1
7.93577	-72.844	1	2	1
7.97744	-73.8022	1	2	1
8.0191	-74.7197	1	2	1
8.06077	-75.6983	1	2	1
8.10244	-76.6157	1	2	1
8.1441	-77.5331	1	2	1
8.18577	-78.4404	1	2	1
8.22744	-79.6126	1	2	1
8.2691	-80.5607	1	2	1
8.31077	-81.5189	1	2	1
8.35244	-82.5484	1	2	1
8.3941	-83.4455	1	2	1
8.43577	-84.5973	1	2	1
8.47744	-85.739	1	2	1
8.5191	-86.7584	1	2	1
8.56077	-87.9409	1	2	1
8.60244	-89.1335	1	2	1
8.6441	-90.2854	1	2	1
8.68577	-91.4883	1	2	1
8.72744	-92.7727	1	2	1
8.7691	-94.0265	1	2	1
8.81077	-95.3007	1	2	1
8.85244	-96.5749	1	2	1
8.8941	-97.8287	1	2	1
8.93577	-99.1335	1	2	1
8.97744	-100.489	1	2	1
9.0191	-101.845	1	2	1
9.06077	-103.18	1	2	1
9.10244	-104.506	1	2	1
9.1441	-105.892	1	2	1
9.18577	-107.288	1	2	1
9.22744	-107.92	1	2	1
9.2691	-109.98	1	2	1
9.31077	-111.295	1	2	1
9.35244	-112.65	1	2	1
9.3941	-114.057	1	2	1
9.43577	-115.505	1	2	1
9.47744	-116.972	1	2	1
9.5191	-118.41	1	2	1
9.56077	-119.969	1	2	1
9.60244	-121.549	1	2	1
9.6441	-123.028	1	2	1
9.68577	-124.597	1	2	1
9.72744	-126.116	1	2	1
9.7691	-127.666	1	2	1
9.81077	-129.235	1	2	1
9.85244	-130.826	1	2	1
9.8941	-132.406	1	2	1
9.93577	-134.016	1	2	1
9.97744	-135.637	1	2	1
10.0191	-137.238	1	2	1
10.0608	-138.858	1	2	1
10.1024	-140.418	1	2	1
10.1441	-142.069	1	2	1
10.1858	-143.639	1	2	1
10.2274	-145.219	1	2	1
10.2691	-146.677	1	2	1
10.3108	-148.226	1	2	1
10.3524	-149.766	1	2	1
10.3941	-151.325	1	2	1
10.4358	-152.803	1	2	1
10.4774	-154.292	1	2	1
10.5191	-155.719	1	2	1
10.5608	-157.095	1	2	1
10.6024	-158.512	1	2	1
10.6441	-159.898	1	2	1
10.6858	-161.254	1	2	1
10.7274	-162.63	1	2	1
10.7691	-164.037	1	2	1
10.8108	-165.392	1	2	1
10.8524	-166.656	1	2	1
10.8941	-167.798	1	2	1
10.9358	-169.042	1	2	1
10.9774	-170.234	1	2	1
11.0191	-171.427	1	2	1
11.0608	-172.62	1	2	1
11.1024	-173.772	1	2	1
11.1441	-174.924	1	2	1
11.1858	-176.055	1	2	1
11.2274	-175.923	1	2	1
11.2691	-178.135	1	2	1
11.3108	-179.368	1	2	1
11.3524	-180.153	1	2	1
11.3941	-180.948	1	2	1
11.4358	-182.518	1	2	1
11.4774	-183.884	1	2	1
11.5191	-185.178	1	2	1
11.5608	-186.351	1	2	1
11.6024	-186.34	1	2	1
11.6441	-188.777	1	2	1
11.6858	-189.959	1	2	1
11.7274	-191.162	1	2	1
11.7691	-192.294	1	2	1
11.8108	-193.415	1	2	1
11.8524	-194.577	1	2	1
11.8941	-195.698	1	2	1
11.9358	-196.799	1	2	1
11.9774	-197.941	1	2	1
12.0191	-199.083	1	2	1
12.0608	-200.255	1	2	1
12.1024	-201.376	1	2	1
12.1441	-202.518	1	2	1
12.1858	-203.721	1	2	1
12.2274	-205.127	1	2	1
12.2691	-206.972	1	2	1
12.3108	-208.359	1	2	1
12.3524	-209.684	1	2	1
12.3941	-210.948	1	2	1
12.4358	-212.294	1	2	1
12.4774	-213.7	1	2	1
12.5191	-215.076	1	2	1
12.5608	-216.626	1	2	1
12.6024	-218.073	1	2	1
12.6441	-219.664	1	2	1
12.6858	-221.295	1	2	1
12.7274	-223.129	1	2	1
12.7691	-224.771	1	2	1
12.8108	-226.402	1	2	1
12.8524	-228.196	1	2	1
12.8941	-229.918	1	2	1
12.9358	-231.662	1	2	1
12.9774	-233.527	1	2	1
13.0191	-235.403	1	2	1
13.0608	-237.258	1	2	1
13.1024	-239.307	1	2	1
13.1441	-241.366	1	2	1
13.1858	-243.242	1	2	1
13.2274	-245.525	1	2	1
13.2691	-247.829	1	2	1
13.3108	-250.112	1	2	1
13.3524	-252.406	1	2	1
13.3941	-254.822	1	2	1
13.4358	-257.146	1	2	1
13.4774	-259.827	1	2	1
13.5191	-262.446	1	2	1
13.5608	-265.127	1	2	1
13.6024	-268.094	1	2	1
13.6441	-271.203	1	2	1
13.6858	-271.611	1	2	1
13.7274	-278.573	1	2	1
13.7691	-282.202	1	2	1
13.8108	-285.912	1	2	1
13.8524	-289.725	1	2	1
13.8941	-293.588	1	2	1
13.9358	-297.594	1	2	1
13.9774	-301.692	1	2	1
14.0191	-306.045	1	2	1
14.0608	-310.642	1	2	1
14.1024	-315.199	1	2	1
14.1441	-319.49	1	2	1
14.1858	-324.913	1	2	1
14.2274	-329.796	1	2	1
14.2691	-336.534	1	2	1
14.3108	-344.975	1	2	1
14.3524	-351.896	1	2	1
14.3941	-358.328	1	2	1
14.4358	-364.903	1	2	1
14.4774	-371.213	1	2	1
14.5191	-377.625	1	2	1
14.5608	-385.556	1	2	1
14.6024	-393.109	1	2	1
14.6441	-399.674	1	2	1
14.6858	-408.022	1	2	1
14.7274	-416.565	1	2	1
14.7691	-424.985	1	2	1
14.8108	-433.986	1	2	1
14.8524	-443.802	1	2	1
14.8941	-453.415	1	2	1
14.9358	-464.434	1	2	1
14.9774	-475.403	1	2	1
15.0191	-486.616	1	2	1
15.0608	-497.737	1	2	1
15.1024	-509.623	1	2	1
15.1441	-520.948	1	2	1
15.1788	-531.784	1	2	1
15.2274	-547.564	1	2	1
15.2691	-561.162	1	2	1
20.8038	-8970.44	1	2	1
0.00692455	-7.04383	1	1	1
0.0485912	-7.50255	1	1	1
0.0902579	-8.20591	1	1	1
0.131925	-9.02141	1	1	1
0.173591	-9.77574	1	1	1
0.215258	-10.3976	1	1	1
0.256925	-10.8155	1	1	1
0.298591	-11.1927	1	1	1
0.340258	-11.6106	1	1	1
0.381925	-11.5698	1	1	1
0.430536	-12.314	1	1	1
0.472202	-12.4975	1	1	1
0.520813	-13.0989	1	1	1
0.56248	-13.5168	1	1	1
0.604147	-13.578	1	1	1
0.645813	-14.1081	1	1	1
0.68748	-14.6075	1	1	1
0.729147	-14.893	1	1	1
0.770813	-15.2294	1	1	1
0.81248	-15.6065	1	1	1
0.854147	-15.9225	1	1	1
0.895813	-16.2895	1	1	1
0.93748	-16.5545	1	1	1
0.979147	-16.9419	1	1	1
1.02081	-17.2375	1	1	1
1.06248	-17.6249	1	1	1
1.10415	-17.8797	1	1	1
1.14581	-18.2467	1	1	1
1.18748	-18.5729	1	1	1
1.22915	-18.7462	1	1	1
1.27081	-18.7258	1	1	1
1.31248	-19.2457	1	1	1
1.35415	-19.4088	1	1	1
1.39581	-19.6636	1	1	1
1.42327	-19.8573	1	1	1
1.42744	-19.8471	1	1	1
1.4316	-19.8267	1	1	1
1.43577	-19.8573	1	1	1
1.43994	-19.9083	1	1	1
1.4441	-19.949	1	1	1
1.44827	-19.9898	1	1	1
1.45244	-19.9898	1	1	1
1.4566	-20.0408	1	1	1
1.46077	-20.051	1	1	1
1.47744	-20.1427	1	1	1
1.5191	-20.367	1	1	1
1.56077	-20.4995	1	1	1
1.60244	-20.7849	1	1	1
1.6441	-20.7238	1	1	1
1.68577	-21.1825	1	1	1
1.72744	-21.5087	1	1	1
1.7691	-21.7533	1	1	1
1.81077	-22.0285	1	1	1
1.85244	-22.2732	1	1	1
1.8941	-22.4669	1	1	1
1.93577	-22.6606	1	1	1
1.97744	-22.946	1	1	1
2.0191	-23.2008	1	1	1
2.06077	-23.3945	1	1	1
2.10244	-23.5882	1	1	1
2.1441	-23.7717	1	1	1
2.18577	-24.0061	1	1	1
2.22744	-24.1998	1	1	1
2.2691	-24.4139	1	1	1
2.31077	-24.5668	1	1	1
2.35244	-24.7401	1	1	1
2.3941	-24.7808	1	1	1
2.43577	-25.0968	1	1	1
2.47744	-25.3517	1	1	1
2.5191	-25.5963	1	1	1
2.56077	-25.8104	1	1	1
2.60244	-25.5861	1	1	1
2.6441	-26.0347	1	1	1
2.68577	-26.3099	1	1	1
2.72744	-26.2793	1	1	1
2.7691	-26.4424	1	1	1
2.81077	-26.7074	1	1	1
2.85244	-26.8807	1	1	1
2.8941	-27.0948	1	1	1
2.93577	-27.2681	1	1	1
2.97744	-27.4924	1	1	1
3.0191	-27.6555	1	1	1
3.06077	-27.9511	1	1	1
3.10244	-28.1448	1	1	1
3.1441	-28.2467	1	1	1
3.18577	-28.4811	1	1	1
3.22744	-28.5933	1	1	1
3.2691	-28.2773	1	1	1
3.31077	-29.0826	1	1	1
3.35244	-29.2762	1	1	1
3.3941	-29.419	1	1	1
3.43577	-29.6228	1	1	1
3.47744	-29.735	1	1	1
3.5191	-29.9592	1	1	1
3.56077	-30.1631	1	1	1
3.60244	-30.3466	1	1	1
3.6441	-30.5301	1	1	1
3.68577	-30.8155	1	1	1
3.72744	-31.0296	1	1	1
3.7691	-31.2232	1	1	1
3.81077	-31.4373	1	1	1
3.85244	-31.6004	1	1	1
3.8941	-31.8349	1	1	1
3.93577	-32.0795	1	1	1
3.97744	-32.2732	1	1	1
4.0191	-32.4363	1	1	1
4.06077	-32.63	1	1	1
4.10244	-32.8746	1	1	1
4.1441	-33.0887	1	1	1
4.18577	-33.2926	1	1	1
4.22744	-33.5474	1	1	1
4.2691	-33.792	1	1	1
4.31077	-33.9042	1	1	1
4.35244	-34.1488	1	1	1
4.3941	-34.3833	1	1	1
4.43577	-34.3935	1	1	1
4.47744	-34.5973	1	1	1
4.5191	-34.6177	1	1	1
4.56077	-34.9337	1	1	1
4.60244	-35.3007	1	1	1
4.6441	-35.6881	1	1	1
4.68577	-36.0041	1	1	1
4.72744	-36.3914	1	1	1
4.7691	-36.738	1	1	1
4.81077	-37.0234	1	1	1
4.85244	-37.5127	1	1	1
4.8941	-37.8593	1	1	1
4.93577	-38.2059	1	1	1
4.97744	-38.5423	1	1	1
5.0191	-38.6544	1	1	1
5.06077	-38.9806	1	1	1
5.10244	-39.3476	1	1	1
5.1441	-39.6432	1	1	1
5.18577	-39.9796	1	1	1
5.22744	-40.1835	1	1	1
5.2691	-40.3466	1	1	1
5.31077	-40.9174	1	1	1
5.35244	-41.2232	1	1	1
5.3941	-41.5087	1	1	1
5.43577	-41.7839	1	1	1
5.47744	-42.0795	1	1	1
5.5191	-42.4057	1	1	1
5.56077	-42.7829	1	1	1
5.60244	-43.1702	1	1	1
5.6441	-43.5474	1	1	1
5.68577	-43.7513	1	1	1
5.72744	-44.0877	1	1	1
5.7691	-44.6075	1	1	1
5.81077	-44.8114	1	1	1
5.85244	-45.2497	1	1	1
5.8941	-45.739	1	1	1
5.93577	-46.1774	1	1	1
5.97744	-46.6157	1	1	1
6.0191	-47.0744	1	1	1
6.06077	-47.4516	1	1	1
6.10244	-47.8695	1	1	1
6.1441	-48.3282	1	1	1
6.18577	-48.736	1	1	1
6.22744	-49.1233	1	1	1
6.2691	-49.4801	1	1	1
6.31077	-49.9083	1	1	1
6.35244	-50.2752	1	1	1
6.3941	-50.8563	1	1	1
6.43577	-51.3048	1	1	1
6.47744	-51.7431	1	1	1
6.5191	-52.2018	1	1	1
6.56077	-52.6809	1	1	1
6.60244	-53.1498	1	1	1
6.6441	-53.6493	1	1	1
6.68577	-54.1896	1	1	1
6.72744	-54.7401	1	1	1
6.7691	-55.3007	1	1	1
6.81077	-55.8614	1	1	1
6.85244	-56.4322	1	1	1
6.8941	-56.9827	1	1	1
6.93577	-57.5841	1	1	1
6.97744	-58.1753	1	1	1
7.0191	-58.7666	1	1	1
7.06077	-59.4292	1	1	1
7.10244	-60.0306	1	1	1
7.1441	-60.6626	1	1	1
7.18577	-61.3456	1	1	1
7.22744	-61.947	1	1	1
7.2691	-62.6198	1	1	1
7.31077	-63.2518	1	1	1
7.35244	-63.9042	1	1	1
7.3941	-64.577	1	1	1
7.43577	-65.2497	1	1	1
7.47744	-65.9735	1	1	1
7.5191	-66.4526	1	1	1
7.56077	-67.3191	1	1	1
7.60244	-68.1346	1	1	1
7.6441	-69.001	1	1	1
7.68577	-69.8675	1	1	1
7.72744	-70.7543	1	1	1
7.7691	-71.6922	1	1	1
7.81077	-72.6198	1	1	1
7.85244	-73.5678	1	1	1
7.8941	-74.4954	1	1	1
7.93577	-75.4128	1	1	1
7.97744	-76.4016	1	1	1
8.0191	-77.3293	1	1	1
8.06077	-78.2875	1	1	1
8.10244	-79.2049	1	1	1
8.1441	-80.1121	1	1	1
8.18577	-81.1621	1	1	1
8.22744	-82.212	1	1	1
8.2691	-83.16	1	1	1
8.31077	-84.1386	1	1	1
8.35244	-85.0765	1	1	1
8.3941	-85.9735	1	1	1
8.43577	-87.156	1	1	1
8.47744	-88.2875	1	1	1
8.5191	-89.3476	1	1	1
8.56077	-90.5097	1	1	1
8.60244	-91.7431	1	1	1
8.6441	-92.8848	1	1	1
8.68577	-94.1284	1	1	1
8.72744	-95.4332	1	1	1
8.7691	-96.7074	1	1	1
8.81077	-98.002	1	1	1
8.85244	-99.2966	1	1	1
8.8941	-100.54	1	1	1
8.93577	-101.876	1	1	1
8.97744	-103.242	1	1	1
9.0191	-104.618	1	1	1
9.06077	-105.943	1	1	1
9.10244	-107.319	1	1	1
9.1441	-108.705	1	1	1
9.18577	-110.133	1	1	1
9.22744	-111.091	1	1	1
9.2691	-112.793	1	1	1
9.31077	-114.108	1	1	1
9.35244	-115.474	1	1	1
9.3941	-116.901	1	1	1
9.43577	-118.369	1	1	1
9.47744	-119.817	1	1	1
9.5191	-121.346	1	1	1
9.56077	-122.915	1	1	1
9.60244	-124.22	1	1	1
9.6441	-125.688	1	1	1
9.68577	-127.299	1	1	1
9.72744	-128.797	1	1	1
9.7691	-130.418	1	1	1
9.81077	-131.978	1	1	1
9.85244	-133.639	1	1	1
9.8941	-135.27	1	1	1
9.93577	-136.922	1	1	1
9.97744	-138.573	1	1	1
10.0191	-140.173	1	1	1
10.0608	-141.784	1	1	1
10.1024	-143.466	1	1	1
10.1441	-145.107	1	1	1
10.1858	-146.84	1	1	1
10.2274	-148.43	1	1	1
10.2691	-150.031	1	1	1
10.3108	-151.641	1	1	1
10.3524	-153.201	1	1	1
10.3941	-154.811	1	1	1
10.4358	-156.361	1	1	1
10.4774	-157.931	1	1	1
10.5191	-159.45	1	1	1
10.5608	-160.907	1	1	1
10.6024	-162.161	1	1	1
10.6441	-163.588	1	1	1
10.6858	-165.066	1	1	1
10.7274	-166.544	1	1	1
10.7691	-168.043	1	1	1
10.8108	-169.48	1	1	1
10.8524	-170.826	1	1	1
10.8941	-172.13	1	1	1
10.9358	-173.527	1	1	1
10.9774	-174.913	1	1	1
11.0191	-176.239	1	1	1
11.0608	-177.594	1	1	1
11.1024	-178.94	1	1	1
11.1441	-180.275	1	1	1
11.1858	-181.682	1	1	1
11.2274	-182.589	1	1	1
11.2691	-184.373	1	1	1
11.3108	-185.78	1	1	1
11.3524	-186.86	1	1	1
11.3941	-187.982	1	1	1
11.4358	-189.918	1	1	1
11.4774	-191.774	1	1	1
11.5191	-193.476	1	1	1
11.5608	-195.27	1	1	1
11.6024	-196.096	1	1	1
11.6441	-198.502	1	1	1
11.6858	-200.082	1	1	1
11.7274	-201.753	1	1	1
11.7691	-203.303	1	1	1
11.8108	-204.822	1	1	1
11.8524	-206.514	1	1	1
11.8941	-208.206	1	1	1
11.9358	-209.867	1	1	1
11.9774	-211.611	1	1	1
12.0191	-213.293	1	1	1
12.0608	-215.046	1	1	1
12.1024	-216.809	1	1	1
12.1441	-218.654	1	1	1
12.1858	-220.571	1	1	1
12.2274	-221.621	1	1	1
12.2691	-223.71	1	1	1
12.3108	-225.77	1	1	1
12.3524	-227.849	1	1	1
12.3941	-229.898	1	1	1
12.4358	-231.988	1	1	1
12.4774	-234.149	1	1	1
12.5191	-236.483	1	1	1
12.5608	-238.705	1	1	1
12.6024	-241.213	1	1	1
12.6441	-243.68	1	1	1
12.6858	-246.106	1	1	1
12.7274	-248.97	1	1	1
12.7691	-251.498	1	1	1
12.8108	-254.343	1	1	1
12.8524	-257.115	1	1	1
12.8941	-260.163	1	1	1
12.9358	-263.242	1	1	1
12.9774	-266.473	1	1	1
13.0191	-269.643	1	1	1
13.0608	-273.282	1	1	1
13.1024	-276.891	1	1	1
13.1441	-280.765	1	1	1
13.1858	-284.343	1	1	1
13.2274	-288.777	1	1	1
13.2691	-293.15	1	1	1
13.3108	-297.105	1	1	1
13.3524	-302.008	1	1	1
13.3941	-306.758	1	1	1
13.4358	-311.611	1	1	1
13.4774	-316.83	1	1	1
13.5191	-321.774	1	1	1
13.5608	-327.074	1	1	1
13.6024	-332.762	1	1	1
13.6441	-338.767	1	1	1
13.6858	-340.163	1	1	1
13.7274	-351.254	1	1	1
13.7691	-359.185	1	1	1
13.8108	-366.911	1	1	1
13.8524	-374.292	1	1	1
13.8941	-381.651	1	1	1
13.9358	-390.245	1	1	1
13.9774	-398.461	1	1	1
14.0191	-406.697	1	1	1
14.0608	-415.515	1	1	1
14.1024	-424.822	1	1	1
14.1441	-434.444	1	1	1
14.1858	-444.781	1	1	1
14.2274	-452.334	1	1	1
14.2691	-458.135	1	1	1
14.3108	-472.895	1	1	1
14.3524	-485.545	1	1	1
14.3941	-497.268	1	1	1
14.4358	-508.909	1	1	1
14.4774	-520.968	1	1	1
14.5191	-534.322	1	1	1
14.5608	-547.971	1	1	1
14.6024	-560.683	1	1	1
14.6441	-574.75	1	1	1
14.6858	-590.194	1	1	1
14.7274	-604.271	1	1	1
14.7691	-619.653	1	1	1
14.8108	-635.087	1	1	1
14.8524	-651.305	1	1	1
14.8941	-667.92	1	1	1
14.9358	-687.146	1	1	1
14.9774	-704.699	1	1	1
15.0191	-724.526	1	1	1
15.0608	-745.076	1	1	1
15.1024	-766.789	1	1	1
15.1441	-788.644	1	1	1
15.1788	-806.85	1	1	1
17.8941	-8970.44	1	1	1
0.370553	0.930241	2	0	10000
0.698912	0.93741	2	0	10000
1.26627	0.900962	2	0	10000
1.61148	0.880393	2	0	10000
1.8407	0.867442	2	0	10000
2.37131	0.836568	2	0	10000
2.60386	0.821492	2	0	10000
3.26641	0.776223	2	0	10000
3.60299	0.753929	2	0	10000
4.2891	0.710946	2	0	10000
4.79132	0.677265	2	0	10000
5.26535	0.64575	2	0	10000
5.70988	0.618645	2	0	10000
6.36462	0.580233	2	0	10000
7.48533	0.522494	2	0	10000
8.25202	0.48316	2	0	10000
9.22713	0.435605	2	0	10000
9.56127	0.42065	2	0	10000
10.2148	0.39174	2	0	10000
10.5711	0.375581	2	0	10000
11.2258	0.347153	2	0	10000
11.6	0.328468	2	0	10000
12.2193	0.298396	2	0	10000
12.6447	0.276985	2	0	10000
13.2835	0.24591	2	0	10000
13.6786	0.228549	2	0	10000
14.2414	0.206095	2	0	10000
16.366	0.146151	2	0	10000
17.4867	0.125341	2	0	10000
18.3768	0.11231	2	0	10000
18.6331	0.108982	2	0	10000
19.2795	0.100962	2	0	10000
20.2779	0.0903368	2	0	10000
22.3902	0.0739374	2	0	10000

## Sheet: tens_interpolation
		Tens unten [hPa]	Tens oben [hPa]	Datum / Zeit
m_bot	b_bot	0.24	2.69	41210.7	2012-10-28 16:19:39			2012-10-28 16:19:39	-0.244648	-2.7421
-2.88	118687	0.22	2.68	41210.7	2012-10-28 16:29:39			2012-10-28 16:29:39	-0.224261	-2.73191
m_top	b_top	-118.883	-56.8715	2012-12-09 01:01:10	2012-12-09 01:01:10
-1.44	59346.1	y = m*x+b
		AE unten [t]	AE oben [t]
		41227.2
m_bot	b_bot	388.91	20.01	2012-12-29 09:41:17	388.91	20.01
-1.93629	80304.1	384.82	15.92	2012-12-31 12:23:00	384.82	15.92
m_top	b_top	387.892	18.9916	2012-12-29 22:18:40	2012-12-29 22:18:40
-1.93629	79935.2
