# Supplementary material for: A pore-size classification for peat bogs derived from unsaturated hydraulic properties
Source: Copernicus journal article supplement (doi:10.5194/hess-21-6185-2017), 2017-12-07
Supplement: Supplementary file 21 [file A334_7_HYDRUS.xlsx]

## Sheet: Gewicht
Datum / Zeit	Brutto-Gewicht [g]	Netto-Gewicht [g]	Gewichtsänderung [g]	Zeit [d]	Theta [-]	Verdunstungsrate [cm/d]		Volumen	244
2012-12-08 18:03:31	613.39	247.49	0					Höhe	5
2012-12-09 11:54:27	598.36	232.46	-15.03	0.743695	0.904877	0.414137		A	48.8
2012-12-09 19:48:26	592.16	226.26	-21.23	1.07286	0.879467	0.385974		Theta0	0.966475
2012-12-10 09:25:49	581.93	216.03	-31.46	1.64049	0.837541	0.369313		Trockengewicht	11.67
2012-12-10 17:42:16	576.54	210.64	-36.85	1.98524	0.815451	0.320376		Ks (as in Ksat)
2012-12-10 23:12:25	573.1	207.2	-40.29	2.21451	0.801352	0.307466		delta System [g]	365.9
2012-12-11 11:56:49	564.8	198.9	-48.59	2.74534	0.767336	0.320406
2012-12-11 17:30:20	561.01	195.11	-52.38	2.97695	0.751803	0.33532
2012-12-12 09:24:12	550.52	184.62	-62.87	3.63936	0.708811	0.32451
2012-12-13 09:55:44	534.84	168.94	-78.55	4.66126	0.644549	0.314425
2012-12-13 22:00:03	526.37	160.47	-87.02	5.16426	0.609836	0.345064
2012-12-14 09:22:37	518.84	152.94	-94.55	5.63826	0.578975	0.32553
2012-12-14 20:03:02	511.99	146.09	-101.4	6.083	0.550902	0.315626
2012-12-15 11:46:30	502.68	136.78	-110.71	6.73818	0.512746	0.291183
2012-12-16 14:40:51	488.28	122.38	-125.11	7.85925	0.45373	0.263214
2012-12-17 09:03:44	478.4	112.5	-134.99	8.62515	0.413238	0.264342
2012-12-18 08:30:08	465.09	99.19	-148.3	9.60181	0.358689	0.279263
2012-12-18 16:29:04	461.15	95.25	-152.24	9.93441	0.342541	0.242751
2012-12-19 08:10:06	453.91	88.01	-159.48	10.5879	0.312869	0.227028
2012-12-19 16:43:13	449.63	83.73	-163.76	10.9442	0.295328	0.246131
2012-12-20 08:25:55	441.52	75.62	-171.87	11.5989	0.26209	0.253857
2012-12-20 17:24:32	436.63	70.73	-176.76	11.9729	0.242049	0.267903
2012-12-21 08:16:26	428.75	62.85	-184.64	12.5923	0.209754	0.260705
2012-12-21 18:31:21	423.28	57.38	-190.11	13.0193	0.187336	0.26249
2012-12-22 09:50:15	415.75	49.85	-197.64	13.6574	0.156475	0.241808
2012-12-22 19:20:32	411.72	45.82	-201.67	14.0535	0.139959	0.208522
2012-12-23 08:48:25	406.81	40.91	-206.58	14.6145	0.119836	0.179341
2012-12-25 11:45:37	393.81	27.91	-219.58	16.7376	0.0665574	0.125476
2012-12-26 14:40:09	389.36	23.46	-224.03	17.8588	0.0483197	0.0813309
2012-12-27 12:01:37	386.54	20.64	-226.85	18.7487	0.0367623	0.0649362
2012-12-27 18:14:01	385.82	19.92	-227.57	19.0073	0.0338115	0.0570499
2012-12-28 09:44:48	384.01	18.11	-229.38	19.6537	0.0263934	0.0573819
2012-12-29 09:40:26	381.7	15.8	-231.69	20.6506	0.0169262	0.04748

## Sheet: Tensionen
Datum / Zeit	Tension unten [hPa]	Tension oben [hPa]	Zeit [d]	MP bot(2) [cm]	MP top(1) [cm]		WÄGUNG START
2012-12-08 17:51:08	3.33	5.86	-0.00860496	-3.3945	-5.9735		41251.8	-6.82977
2012-12-08 17:52:08	3.37	5.9	-0.00791052	-3.43527	-6.01427		2012-12-08 18:03:31
2012-12-08 17:53:08	3.42	5.94	-0.00721607	-3.48624	-6.05505
2012-12-08 17:54:08	3.45	5.98	-0.00652163	-3.51682	-6.09582
2012-12-08 17:55:08	3.52	6.04	-0.00582718	-3.58818	-6.15698
2012-12-08 17:56:08	3.57	6.08	-0.00513274	-3.63914	-6.19776
2012-12-08 17:57:08	3.62	6.13	-0.0044383	-3.69011	-6.24873
2012-12-08 17:58:08	3.68	6.19	-0.00374385	-3.75127	-6.30989
2012-12-08 17:59:08	3.72	6.24	-0.00304941	-3.79205	-6.36086
2012-12-08 18:00:08	3.79	6.29	-0.00235496	-3.8634	-6.41182
2012-12-08 18:01:08	3.84	6.33	-0.00166052	-3.91437	-6.4526
2012-12-08 18:02:08	3.88	6.38	-0.000966073	-3.95515	-6.50357
2012-12-08 18:03:08	3.92	6.42	-0.000271629	-3.99592	-6.54434
2012-12-08 18:04:08	3.85	6.7	0.000422815	-3.92457	-6.82977
2012-12-08 18:05:08	3.48	6.02	0.00111726	-3.5474	-6.1366
2012-12-08 18:06:08	3.49	6.03	0.0018117	-3.55759	-6.14679
2012-12-08 18:07:08	3.66	6.19	0.00250615	-3.73089	-6.30989
2012-12-08 18:08:08	3.73	6.26	0.00320059	-3.80224	-6.38124
2012-12-08 18:09:08	3.76	6.29	0.00389504	-3.83282	-6.41182	2012-12-08 18:09:08
2012-12-08 18:10:08	3.82	6.36	0.00458948	-3.89399	-6.48318
2012-12-08 18:11:08	3.88	6.41	0.00528393	-3.95515	-6.53415
2012-12-08 18:12:08	3.94	6.48	0.00597837	-4.01631	-6.6055
2012-12-08 18:13:08	4	6.52	0.00667282	-4.07747	-6.64628
2012-12-08 18:14:08	4.05	6.58	0.00736726	-4.12844	-6.70744
2012-12-08 18:15:08	4.11	6.63	0.0080617	-4.1896	-6.75841
2012-12-08 18:16:08	4.16	6.68	0.00875615	-4.24057	-6.80938
2012-12-08 18:17:08	4.2	6.71	0.00945059	-4.28135	-6.83996
2012-12-08 18:18:08	4.24	6.76	0.010145	-4.32212	-6.89093
2012-12-08 18:19:08	4.29	6.8	0.0108395	-4.37309	-6.9317	2012-12-08 18:19:08
2012-12-08 18:20:08	4.32	6.84	0.0115339	-4.40367	-6.97248
2012-12-08 18:21:08	4.37	6.88	0.0122284	-4.45464	-7.01325
2012-12-08 18:22:08	4.41	6.93	0.0129228	-4.49541	-7.06422
2012-12-08 18:23:08	4.45	6.96	0.0136173	-4.53619	-7.0948
2012-12-08 18:24:08	4.49	7.01	0.0143117	-4.57696	-7.14577
2012-12-08 18:25:08	4.53	7.04	0.0150061	-4.61774	-7.17635
2012-12-08 18:26:08	4.57	7.08	0.0157006	-4.65851	-7.21713
2012-12-08 18:27:08	4.61	7.11	0.016395	-4.69929	-7.24771
2012-12-08 18:28:08	4.65	7.15	0.0170895	-4.74006	-7.28848
2012-12-08 18:29:08	4.69	7.19	0.0177839	-4.78084	-7.32926	2012-12-08 18:29:08
2012-12-08 18:30:08	4.73	7.22	0.0184784	-4.82161	-7.35984
2012-12-08 18:31:08	4.77	7.27	0.0191728	-4.86239	-7.41081
2012-12-08 18:32:08	4.8	7.29	0.0198673	-4.89297	-7.43119
2012-12-08 18:33:08	4.84	7.33	0.0205617	-4.93374	-7.47197
2012-12-08 18:34:08	4.89	7.38	0.0212561	-4.98471	-7.52294
2012-12-08 18:35:08	4.92	7.42	0.0219506	-5.01529	-7.56371
2012-12-08 18:36:08	4.95	7.45	0.022645	-5.04587	-7.59429
2012-12-08 18:37:08	5	7.49	0.0233395	-5.09684	-7.63507
2012-12-08 18:38:08	5.03	7.53	0.0240339	-5.12742	-7.67584
2012-12-08 18:39:08	5.07	7.56	0.0247284	-5.1682	-7.70642	2012-12-08 18:39:08
2012-12-08 18:40:08	5.11	7.61	0.0254228	-5.20897	-7.75739
2012-12-08 18:41:08	5.15	7.64	0.0261173	-5.24975	-7.78797
2012-12-08 18:42:08	5.2	7.68	0.0268117	-5.30071	-7.82875
2012-12-08 18:43:08	5.22	7.72	0.0275061	-5.3211	-7.86952
2012-12-08 18:44:08	5.25	7.75	0.0282006	-5.35168	-7.9001
2012-12-08 18:45:08	5.3	7.8	0.028895	-5.40265	-7.95107
2012-12-08 18:46:08	5.32	7.81	0.0295895	-5.42304	-7.96126
2012-12-08 18:47:08	5.35	7.84	0.0302839	-5.45362	-7.99185
2012-12-08 18:48:08	5.39	7.88	0.0309784	-5.49439	-8.03262
2012-12-08 18:49:08	5.43	7.92	0.0316728	-5.53517	-8.07339
2012-12-08 18:50:08	5.46	7.96	0.0323673	-5.56575	-8.11417
2012-12-08 18:51:08	5.49	7.98	0.0330617	-5.59633	-8.13456
2012-12-08 19:01:08	5.81	8.3	0.0400061	-5.92253	-8.46075
2012-12-08 19:11:08	6.15	8.64	0.0469506	-6.26911	-8.80734
2012-12-08 19:21:08	6.45	8.94	0.053895	-6.57492	-9.11315
2012-12-08 19:31:08	6.75	9.25	0.0608395	-6.88073	-9.42915	2012-12-08 19:31:08
2012-12-08 19:41:08	7.05	9.54	0.0677839	-7.18654	-9.72477
2012-12-08 19:51:08	7.3	9.79	0.0747284	-7.44139	-9.97961
2012-12-08 20:01:08	7.6	10.08	0.0816728	-7.7472	-10.2752
2012-12-08 20:11:08	7.85	10.36	0.0886173	-8.00204	-10.5607
2012-12-08 20:21:08	8	10.49	0.0955617	-8.15494	-10.6932
2012-12-08 20:31:08	8.23	10.72	0.102506	-8.3894	-10.9276	2012-12-08 20:31:08
2012-12-08 20:41:08	8.47	10.96	0.109451	-8.63405	-11.1723
2012-12-08 20:51:08	8.74	11.23	0.116395	-8.90928	-11.4475
2012-12-08 21:01:08	8.97	11.47	0.123339	-9.14373	-11.6922
2012-12-08 21:11:08	9.2	11.7	0.130284	-9.37819	-11.9266
2012-12-08 21:21:08	9.42	11.92	0.137228	-9.60245	-12.1509
2012-12-08 21:31:08	9.66	12.15	0.144173	-9.84709	-12.3853	2012-12-08 21:31:08
2012-12-08 21:41:08	9.88	12.38	0.151117	-10.0714	-12.6198
2012-12-08 21:51:08	10.06	12.54	0.158062	-10.2548	-12.7829
2012-12-08 22:01:08	10.28	12.78	0.165006	-10.4791	-13.0275
2012-12-08 22:11:08	10.51	13.01	0.171951	-10.7136	-13.262
2012-12-08 22:21:08	10.71	13.22	0.178895	-10.9174	-13.476
2012-12-08 22:31:08	10.93	13.42	0.185839	-11.1417	-13.6799	2012-12-08 22:31:08
2012-12-08 22:41:08	11.07	13.57	0.192784	-11.2844	-13.8328
2012-12-08 22:51:08	11.25	13.75	0.199728	-11.4679	-14.0163
2012-12-08 23:01:08	11.45	13.95	0.206673	-11.6718	-14.2202
2012-12-08 23:11:08	11.63	14.14	0.213617	-11.8552	-14.4139
2012-12-08 23:21:08	11.82	14.32	0.220562	-12.0489	-14.5973
2012-12-08 23:31:08	12.01	14.51	0.227506	-12.2426	-14.791	2012-12-08 23:31:08
2012-12-08 23:41:08	12.17	14.66	0.234451	-12.4057	-14.9439
2012-12-08 23:51:08	12.36	14.85	0.241395	-12.5994	-15.1376
2012-12-09 00:01:08	12.43	14.93	0.248339	-12.6707	-15.2192
2012-12-09 00:11:08	12.6	15.1	0.255284	-12.844	-15.3925
2012-12-09 00:21:08	12.77	15.27	0.262228	-13.0173	-15.5657
2012-12-09 00:31:08	12.92	15.41	0.269173	-13.1702	-15.7085	2012-12-09 00:31:08
2012-12-09 00:41:08	13.06	15.55	0.276117	-13.3129	-15.8512
2012-12-09 00:51:08	13.21	15.7	0.283062	-13.4659	-16.0041
2012-12-09 01:01:08	13.34	15.83	0.290006	-13.5984	-16.1366
2012-12-09 01:11:08	13.5	15.99	0.296951	-13.7615	-16.2997
2012-12-09 01:21:08	13.66	16.16	0.303895	-13.9246	-16.473
2012-12-09 01:31:08	13.75	16.24	0.310839	-14.0163	-16.5545	2012-12-09 01:31:08
2012-12-09 01:41:08	13.91	16.39	0.317784	-14.1794	-16.7074
2012-12-09 01:51:08	14.02	16.52	0.324728	-14.2915	-16.84
2012-12-10 13:09:40	18.12	20.61	1.79594	-18.4709	-21.0092
2012-12-10 13:10:40	18.15	20.65	1.79663	-18.5015	-21.0499
2012-12-10 13:11:40	18.15	20.64	1.79733	-18.5015	-21.0398
2012-12-10 13:12:40	18.18	20.66	1.79802	-18.5321	-21.0601	2012-12-10 13:12:40
2012-12-10 13:13:40	18.18	20.66	1.79871	-18.5321	-21.0601
2012-12-10 13:14:40	18.15	20.63	1.79941	-18.5015	-21.0296
2012-12-10 13:15:40	18.17	20.66	1.8001	-18.5219	-21.0601
2012-12-10 13:16:40	18.16	20.64	1.8008	-18.5117	-21.0398
2012-12-10 13:17:40	18.17	20.65	1.80149	-18.5219	-21.0499
2012-12-10 13:18:40	18.17	20.66	1.80219	-18.5219	-21.0601	2012-12-10 13:18:40
2012-12-10 13:19:40	18.17	20.65	1.80288	-18.5219	-21.0499
2012-12-10 13:20:40	18.17	20.65	1.80358	-18.5219	-21.0499
2012-12-10 13:21:40	18.16	20.65	1.80427	-18.5117	-21.0499
2012-12-10 13:22:40	18.17	20.65	1.80496	-18.5219	-21.0499
2012-12-10 13:23:40	18.19	20.68	1.80566	-18.5423	-21.0805
2012-12-10 13:24:40	18.15	20.64	1.80635	-18.5015	-21.0398	2012-12-10 13:24:40
2012-12-10 13:25:40	18.19	20.66	1.80705	-18.5423	-21.0601
2012-12-10 13:26:40	18.16	20.64	1.80774	-18.5117	-21.0398
2012-12-10 13:27:40	18.19	20.67	1.80844	-18.5423	-21.0703
2012-12-10 13:28:40	18.19	20.67	1.80913	-18.5423	-21.0703
2012-12-10 13:29:40	18.2	20.69	1.80983	-18.5525	-21.0907
2012-12-10 13:30:40	18.19	20.67	1.81052	-18.5423	-21.0703	2012-12-10 13:30:40
2012-12-10 13:31:40	18.19	20.69	1.81121	-18.5423	-21.0907
2012-12-10 13:32:40	18.19	20.67	1.81191	-18.5423	-21.0703
2012-12-10 13:33:40	18.21	20.69	1.8126	-18.5627	-21.0907
2012-12-10 13:34:40	18.16	20.64	1.8133	-18.5117	-21.0398
2012-12-10 13:35:40	18.18	20.66	1.81399	-18.5321	-21.0601
2012-12-10 13:36:40	18.19	20.68	1.81469	-18.5423	-21.0805	2012-12-10 13:36:40
2012-12-10 13:37:40	18.2	20.7	1.81538	-18.5525	-21.1009
2012-12-10 13:38:40	18.22	20.71	1.81608	-18.5729	-21.1111
2012-12-10 13:39:40	18.23	20.72	1.81677	-18.5831	-21.1213
2012-12-10 13:40:40	18.21	20.68	1.81746	-18.5627	-21.0805
2012-12-10 13:41:40	18.21	20.7	1.81816	-18.5627	-21.1009
2012-12-10 13:42:40	18.24	20.72	1.81885	-18.5933	-21.1213	2012-12-10 13:42:40
2012-12-10 13:43:40	18.21	20.7	1.81955	-18.5627	-21.1009
2012-12-10 13:44:40	18.23	20.7	1.82024	-18.5831	-21.1009
2012-12-10 13:45:40	18.24	20.7	1.82094	-18.5933	-21.1009
2012-12-10 13:46:40	18.19	20.69	1.82163	-18.5423	-21.0907
2012-12-10 13:47:40	18.21	20.7	1.82233	-18.5627	-21.1009
2012-12-10 13:48:40	18.23	20.73	1.82302	-18.5831	-21.1315	2012-12-10 13:48:40
2012-12-10 13:49:40	18.25	20.74	1.82371	-18.6035	-21.1417
2012-12-10 13:50:40	18.26	20.72	1.82441	-18.6137	-21.1213
2012-12-10 13:51:40	18.24	20.73	1.8251	-18.5933	-21.1315
2012-12-10 13:52:40	18.25	20.74	1.8258	-18.6035	-21.1417
2012-12-10 13:53:40	18.26	20.74	1.82649	-18.6137	-21.1417
2012-12-10 13:54:40	18.27	20.75	1.82719	-18.6239	-21.1519	2012-12-10 13:54:40
2012-12-10 13:55:40	18.28	20.77	1.82788	-18.634	-21.1723
2012-12-10 13:56:40	18.25	20.75	1.82858	-18.6035	-21.1519
2012-12-10 13:57:40	18.28	20.77	1.82927	-18.634	-21.1723
2012-12-10 13:58:40	18.29	20.78	1.82996	-18.6442	-21.1825
2012-12-10 13:59:40	18.3	20.77	1.83066	-18.6544	-21.1723
2012-12-10 14:00:40	18.33	20.77	1.83135	-18.685	-21.1723	2012-12-10 14:00:40
2012-12-10 14:01:40	18.29	20.78	1.83205	-18.6442	-21.1825
2012-12-10 14:02:40	18.27	20.77	1.83274	-18.6239	-21.1723
2012-12-10 14:03:40	18.3	20.8	1.83344	-18.6544	-21.2029
2012-12-10 14:04:40	18.29	20.75	1.83413	-18.6442	-21.1519
2012-12-10 14:05:40	18.3	20.78	1.83483	-18.6544	-21.1825
2012-12-10 14:06:40	18.31	20.77	1.83552	-18.6646	-21.1723	2012-12-10 14:06:40
2012-12-10 14:07:40	18.31	20.8	1.83621	-18.6646	-21.2029
2012-12-10 14:08:40	18.3	20.79	1.83691	-18.6544	-21.1927
2012-12-10 14:18:40	18.34	20.83	1.84385	-18.6952	-21.2334
2012-12-10 14:28:40	18.37	20.85	1.8508	-18.7258	-21.2538
2012-12-10 14:38:40	18.43	20.89	1.85774	-18.787	-21.2946
2012-12-10 14:48:40	18.45	20.94	1.86469	-18.8073	-21.3456	2012-12-10 14:48:40
2012-12-10 14:58:40	18.45	20.94	1.87163	-18.8073	-21.3456
2012-12-10 15:08:40	18.5	20.97	1.87858	-18.8583	-21.3761
2012-12-10 15:18:40	18.55	21.04	1.88552	-18.9093	-21.4475
2012-12-10 15:28:40	18.57	21.05	1.89246	-18.9297	-21.4577
2012-12-10 15:38:40	18.65	21.11	1.89941	-19.0112	-21.5189
2012-12-10 15:48:40	18.7	21.17	1.90635	-19.0622	-21.58	2012-12-10 15:48:40
2012-12-10 15:58:40	18.7	21.18	1.9133	-19.0622	-21.5902
2012-12-10 16:08:40	18.76	21.25	1.92024	-19.1233	-21.6616
2012-12-10 16:18:40	18.72	21.19	1.92719	-19.0826	-21.6004
2012-12-10 16:28:40	18.77	21.25	1.93413	-19.1335	-21.6616
2012-12-10 16:38:40	18.79	21.27	1.94108	-19.1539	-21.682
2012-12-10 16:48:40	18.88	21.34	1.94802	-19.2457	-21.7533	2012-12-10 16:48:40
2012-12-10 16:58:40	18.86	21.36	1.95496	-19.2253	-21.7737
2012-12-10 17:08:40	18.89	21.38	1.96191	-19.2559	-21.7941
2012-12-10 17:18:40	18.97	21.44	1.96885	-19.3374	-21.8552
2012-12-10 17:28:40	18.98	21.47	1.9758	-19.3476	-21.8858
2012-12-10 17:38:40	19.04	21.52	1.98274	-19.4088	-21.9368
2012-12-10 17:48:40	18.53	21.01	1.98969	-18.8889	-21.4169	2012-12-10 17:48:40
2012-12-10 17:58:40	18.76	21.22	1.99663	-19.1233	-21.631
2012-12-10 18:08:40	18.93	21.41	2.00358	-19.2966	-21.8247
2012-12-10 18:18:40	19.02	21.49	2.01052	-19.3884	-21.9062
2012-12-10 18:28:40	19.08	21.56	2.01746	-19.4495	-21.9776
2012-12-10 18:38:40	19.12	21.59	2.02441	-19.4903	-22.0082
2012-12-10 18:48:40	19.15	21.63	2.03135	-19.5209	-22.0489	2012-12-10 18:48:40
2012-12-10 18:58:40	19.17	21.65	2.0383	-19.5413	-22.0693
2012-12-10 19:08:40	19.22	21.7	2.04524	-19.5923	-22.1203
2012-12-10 19:18:40	19.24	21.72	2.05219	-19.6126	-22.1407
2012-12-10 19:28:40	19.3	21.77	2.05913	-19.6738	-22.1916
2012-12-10 19:38:40	19.35	21.83	2.06608	-19.7248	-22.2528
2012-12-10 19:48:40	19.38	21.86	2.07302	-19.7554	-22.2834	2012-12-10 19:48:40
2012-12-10 19:58:40	19.39	21.87	2.07996	-19.7655	-22.2936
2012-12-10 20:08:40	19.44	21.92	2.08691	-19.8165	-22.3445
2012-12-10 20:18:40	19.47	21.95	2.09385	-19.8471	-22.3751
2012-12-10 20:28:40	19.43	21.9	2.1008	-19.8063	-22.3242
2012-12-10 20:38:40	19.49	21.96	2.10774	-19.8675	-22.3853
2012-12-10 20:48:40	19.53	21.98	2.11469	-19.9083	-22.4057	2012-12-10 20:48:40
2012-12-10 20:58:40	19.58	22.04	2.12163	-19.9592	-22.4669
2012-12-10 21:08:40	19.44	21.92	2.12858	-19.8165	-22.3445
2012-12-10 21:18:40	19.5	21.96	2.13552	-19.8777	-22.3853
2012-12-10 21:28:40	19.59	22.06	2.14246	-19.9694	-22.4873
2012-12-10 21:38:40	19.63	22.11	2.14941	-20.0102	-22.5382
2012-12-10 21:48:40	19.65	22.12	2.15635	-20.0306	-22.5484	2012-12-10 21:48:40
2012-12-10 21:58:40	19.7	22.17	2.1633	-20.0815	-22.5994
2012-12-10 22:08:40	19.7	22.18	2.17024	-20.0815	-22.6096
2012-12-10 22:18:40	19.75	22.22	2.17719	-20.1325	-22.6504
2012-12-10 22:28:40	19.77	22.22	2.18413	-20.1529	-22.6504
2012-12-10 22:38:40	19.64	22.11	2.19108	-20.0204	-22.5382
2012-12-10 22:48:40	19.64	22.11	2.19802	-20.0204	-22.5382	2012-12-10 22:48:40
2012-12-10 22:58:40	19.69	22.16	2.20496	-20.0714	-22.5892
2012-12-10 23:08:40	19.78	22.25	2.21191	-20.1631	-22.6809
2012-12-10 23:18:40	19.62	22.11	2.21885	-20	-22.5382
2012-12-10 23:28:40	19.72	22.2	2.2258	-20.1019	-22.63
2012-12-10 23:38:40	19.77	22.25	2.23274	-20.1529	-22.6809
2012-12-10 23:48:40	19.82	22.3	2.23969	-20.2039	-22.7319	2012-12-10 23:48:40
2012-12-10 23:58:40	19.79	22.26	2.24663	-20.1733	-22.6911
2012-12-11 00:08:40	19.85	22.34	2.25358	-20.2345	-22.7727
2012-12-11 00:18:40	19.89	22.36	2.26052	-20.2752	-22.7931
2012-12-11 00:28:40	19.93	22.41	2.26746	-20.316	-22.844
2012-12-11 00:38:40	19.83	22.3	2.27441	-20.2141	-22.7319
2012-12-11 00:48:40	19.97	22.43	2.28135	-20.3568	-22.8644	2012-12-11 00:48:40
2012-12-11 00:58:40	20.02	22.49	2.2883	-20.4077	-22.9256
2012-12-11 01:08:40	20.06	22.54	2.29524	-20.4485	-22.9766
2012-12-11 01:18:40	20.06	22.53	2.30219	-20.4485	-22.9664
2012-12-11 01:28:40	20.07	22.55	2.30913	-20.4587	-22.9867
2012-12-11 01:38:40	20.1	22.58	2.31608	-20.4893	-23.0173
2012-12-11 01:48:40	20.14	22.62	2.32302	-20.5301	-23.0581	2012-12-11 01:48:40
2012-12-11 01:58:40	20.19	22.66	2.32996	-20.581	-23.0989
2012-12-11 02:08:40	20.23	22.68	2.33691	-20.6218	-23.1193
2012-12-11 02:18:40	20.23	22.69	2.34385	-20.6218	-23.1295
2012-12-11 02:28:40	20.26	22.73	2.3508	-20.6524	-23.1702
2012-12-11 02:38:40	20.22	22.7	2.35774	-20.6116	-23.1397
2012-12-11 02:48:40	20.24	22.71	2.36469	-20.632	-23.1498	2012-12-11 02:48:40
2012-12-11 02:58:40	20.29	22.76	2.37163	-20.683	-23.2008
2012-12-11 03:08:40	20.34	22.8	2.37858	-20.7339	-23.2416
2012-12-11 03:18:40	20.36	22.82	2.38552	-20.7543	-23.262
2012-12-11 03:28:40	20.42	22.89	2.39246	-20.8155	-23.3333
2012-12-11 03:38:40	20.42	22.9	2.39941	-20.8155	-23.3435
2012-12-11 03:48:40	20.41	22.87	2.40635	-20.8053	-23.3129	2012-12-11 03:48:40
2012-12-11 03:58:40	20.45	22.94	2.4133	-20.8461	-23.3843
2012-12-11 04:08:40	20.48	22.97	2.42024	-20.8767	-23.4149
2012-12-11 04:18:40	20.46	22.94	2.42719	-20.8563	-23.3843
2012-12-11 04:28:40	20.51	22.99	2.43413	-20.9072	-23.4353
2012-12-11 04:38:40	20.54	23.02	2.44108	-20.9378	-23.4659
2012-12-11 04:48:40	20.58	23.05	2.44802	-20.9786	-23.4964	2012-12-11 04:48:40
2012-12-11 04:58:40	20.5	22.98	2.45496	-20.897	-23.4251
2012-12-11 05:08:40	20.61	23.06	2.46191	-21.0092	-23.5066
2012-12-11 05:18:40	20.62	23.08	2.46885	-21.0194	-23.527
2012-12-11 05:28:40	20.65	23.11	2.4758	-21.0499	-23.5576
2012-12-11 05:38:40	20.69	23.16	2.48274	-21.0907	-23.6086
2012-12-11 05:48:40	20.69	23.17	2.48969	-21.0907	-23.6188	2012-12-11 05:48:40
2012-12-11 05:58:40	20.75	23.2	2.49663	-21.1519	-23.6493
2012-12-11 06:08:40	20.65	23.2	2.50358	-21.0499	-23.6493
2012-12-11 06:18:40	20.81	23.27	2.51052	-21.213	-23.7207
2012-12-11 06:28:40	20.82	23.24	2.51746	-21.2232	-23.6901
2012-12-11 06:38:40	20.88	23.35	2.52441	-21.2844	-23.8022
2012-12-11 06:48:40	20.89	23.36	2.53135	-21.2946	-23.8124	2012-12-11 06:48:40
2012-12-11 06:58:40	20.9	23.39	2.5383	-21.3048	-23.843
2012-12-11 07:08:40	20.93	23.41	2.54524	-21.3354	-23.8634
2012-12-11 07:18:40	20.96	23.43	2.55219	-21.366	-23.8838
2012-12-11 07:28:40	21.02	23.48	2.55913	-21.4271	-23.9348
2012-12-11 07:38:40	21	23.44	2.56608	-21.4067	-23.894
2012-12-11 07:48:40	21.01	23.49	2.57302	-21.4169	-23.945	2012-12-11 07:48:40
2012-12-11 07:58:40	21.06	23.53	2.57996	-21.4679	-23.9857
2012-12-11 08:08:40	21.09	23.54	2.58691	-21.4985	-23.9959
2012-12-11 08:18:40	21.12	23.58	2.59385	-21.5291	-24.0367
2012-12-11 08:28:40	21.16	23.6	2.6008	-21.5698	-24.0571
2012-12-11 08:38:40	21.12	23.59	2.60774	-21.5291	-24.0469
2012-12-11 08:48:40	21.15	23.62	2.61469	-21.5596	-24.0775	2012-12-11 08:48:40
2012-12-11 08:58:40	21.17	23.65	2.62163	-21.58	-24.1081
2012-12-11 09:08:40	21.21	23.67	2.62858	-21.6208	-24.1284
2012-12-11 09:18:40	21.18	23.65	2.63552	-21.5902	-24.1081
2012-12-11 09:28:40	21.23	23.7	2.64246	-21.6412	-24.159
2012-12-11 09:38:40	21.3	23.73	2.64941	-21.7125	-24.1896
2012-12-11 09:48:40	21.29	23.75	2.65635	-21.7023	-24.21	2012-12-11 09:48:40
2012-12-11 09:58:40	21.3	23.77	2.6633	-21.7125	-24.2304
2012-12-11 10:08:40	21.35	23.81	2.67024	-21.7635	-24.2712
2012-12-11 10:18:40	21.36	23.82	2.67719	-21.7737	-24.2813
2012-12-11 10:28:40	21.38	23.85	2.68413	-21.7941	-24.3119
2012-12-11 10:38:40	21.39	23.85	2.69108	-21.8043	-24.3119
2012-12-11 10:48:40	21.42	23.89	2.69802	-21.8349	-24.3527	2012-12-11 10:48:40
2012-12-11 10:58:40	21.46	23.93	2.70496	-21.8756	-24.3935
2012-12-11 11:08:40	21.46	23.92	2.71191	-21.8756	-24.3833
2012-12-11 11:18:40	21.52	23.99	2.71885	-21.9368	-24.4546
2012-12-11 11:28:40	21.51	23.96	2.7258	-21.9266	-24.4241
2012-12-11 11:38:40	21.55	24.01	2.73274	-21.9674	-24.475
2012-12-11 11:48:40	21.59	24.04	2.73969	-22.0082	-24.5056	2012-12-11 11:48:40
2012-12-11 11:58:40	21.07	23.53	2.74663	-21.4781	-23.9857
2012-12-11 12:08:40	21.3	23.75	2.75358	-21.7125	-24.21
2012-12-11 12:18:40	21.52	23.93	2.76052	-21.9368	-24.3935
2012-12-11 12:28:40	21.54	24	2.76746	-21.9572	-24.4648
2012-12-11 12:38:40	21.64	24.08	2.77441	-22.0591	-24.5464
2012-12-11 12:48:40	21.68	24.12	2.78135	-22.0999	-24.5872	2012-12-11 12:48:40
2012-12-11 12:58:40	21.72	24.17	2.7883	-22.1407	-24.6381
2012-12-11 13:08:40	21.64	24.06	2.79524	-22.0591	-24.526
2012-12-11 13:18:40	21.73	24.19	2.80219	-22.1509	-24.6585
2012-12-11 13:28:40	21.75	24.2	2.80913	-22.1713	-24.6687
2012-12-11 13:38:40	21.76	24.2	2.81608	-22.1814	-24.6687
2012-12-11 13:48:40	21.8	24.25	2.82302	-22.2222	-24.7197	2012-12-11 13:48:40
2012-12-11 13:58:40	21.81	24.27	2.82996	-22.2324	-24.7401
2012-12-11 14:08:40	21.87	24.32	2.83691	-22.2936	-24.791
2012-12-11 14:18:40	21.9	24.33	2.84385	-22.3242	-24.8012
2012-12-11 14:28:40	21.92	24.37	2.8508	-22.3445	-24.842
2012-12-11 14:38:40	21.94	24.38	2.85774	-22.3649	-24.8522
2012-12-11 14:48:40	21.97	24.41	2.86469	-22.3955	-24.8828	2012-12-11 14:48:40
2012-12-11 14:58:40	21.99	24.44	2.87163	-22.4159	-24.9134
2012-12-11 15:08:40	21.98	24.42	2.87858	-22.4057	-24.893
2012-12-11 15:18:40	22	24.46	2.88552	-22.4261	-24.9337
2012-12-11 15:28:40	22.03	24.47	2.89246	-22.4567	-24.9439
2012-12-11 15:38:40	22.03	24.47	2.89941	-22.4567	-24.9439
2012-12-11 15:48:40	22.08	24.53	2.90635	-22.5076	-25.0051	2012-12-11 15:48:40
2012-12-11 15:58:40	22.11	24.54	2.9133	-22.5382	-25.0153
2012-12-11 16:08:40	22.12	24.56	2.92024	-22.5484	-25.0357
2012-12-11 16:18:40	22.14	24.57	2.92719	-22.5688	-25.0459
2012-12-11 16:28:40	22.19	24.63	2.93413	-22.6198	-25.107
2012-12-11 16:38:40	22.22	24.65	2.94108	-22.6504	-25.1274
2012-12-11 16:48:40	22.24	24.69	2.94802	-22.6707	-25.1682	2012-12-11 16:48:40
2012-12-11 16:58:40	22.21	24.66	2.95496	-22.6402	-25.1376
2012-12-11 17:08:40	22.27	24.73	2.96191	-22.7013	-25.209
2012-12-11 17:18:40	21.75	24.2	2.96885	-22.1713	-24.6687
2012-12-11 17:28:40	21.88	24.35	2.9758	-22.3038	-24.8216
2012-12-11 17:38:40	22.02	24.49	2.98274	-22.4465	-24.9643
2012-12-11 17:48:40	22.2	24.65	2.98969	-22.63	-25.1274	2012-12-11 17:48:40
2012-12-11 17:58:40	22.31	24.75	2.99663	-22.7421	-25.2294
2012-12-11 18:08:40	22.31	24.78	3.00358	-22.7421	-25.2599
2012-12-11 18:18:40	22.35	24.8	3.01052	-22.7829	-25.2803
2012-12-11 18:28:40	22.41	24.85	3.01746	-22.844	-25.3313
2012-12-11 18:38:40	22.45	24.89	3.02441	-22.8848	-25.3721
2012-12-11 18:48:40	22.49	24.94	3.03135	-22.9256	-25.423	2012-12-11 18:48:40
2012-12-11 18:58:40	22.54	24.97	3.0383	-22.9766	-25.4536
2012-12-11 19:08:40	22.53	24.96	3.04524	-22.9664	-25.4434
2012-12-11 19:18:40	22.57	25.01	3.05219	-23.0071	-25.4944
2012-12-11 19:28:40	22.62	25.05	3.05913	-23.0581	-25.5352
2012-12-11 19:38:40	22.66	25.09	3.06608	-23.0989	-25.5759
2012-12-11 19:48:40	22.7	25.14	3.07302	-23.1397	-25.6269	2012-12-11 19:48:40
2012-12-11 19:58:40	22.7	25.14	3.07996	-23.1397	-25.6269
2012-12-11 20:08:40	22.75	25.19	3.08691	-23.1906	-25.6779
2012-12-11 20:18:40	22.78	25.22	3.09385	-23.2212	-25.7085
2012-12-11 20:28:40	22.8	25.24	3.1008	-23.2416	-25.7288
2012-12-11 20:38:40	22.81	25.26	3.10774	-23.2518	-25.7492
2012-12-11 20:48:40	22.8	25.24	3.11469	-23.2416	-25.7288	2012-12-11 20:48:40
2012-12-11 20:58:40	22.87	25.29	3.12163	-23.3129	-25.7798
2012-12-11 21:08:40	22.91	25.35	3.12858	-23.3537	-25.841
2012-12-11 21:18:40	22.93	25.37	3.13552	-23.3741	-25.8614
2012-12-11 21:28:40	22.98	25.4	3.14246	-23.4251	-25.8919
2012-12-11 21:38:40	22.99	25.42	3.14941	-23.4353	-25.9123
2012-12-11 21:48:40	23.03	25.46	3.15635	-23.476	-25.9531	2012-12-11 21:48:40
2012-12-11 21:58:40	23.08	25.52	3.1633	-23.527	-26.0143
2012-12-11 22:08:40	23.09	25.53	3.17024	-23.5372	-26.0245
2012-12-11 22:18:40	23.09	25.53	3.17719	-23.5372	-26.0245
2012-12-11 22:28:40	23.1	25.54	3.18413	-23.5474	-26.0347
2012-12-11 22:38:40	23.16	25.59	3.19108	-23.6086	-26.0856
2012-12-11 22:48:40	23.19	25.62	3.19802	-23.6391	-26.1162	2012-12-11 22:48:40
2012-12-11 22:58:40	23.18	25.62	3.20496	-23.629	-26.1162
2012-12-11 23:08:40	23.23	25.66	3.21191	-23.6799	-26.157
2012-12-11 23:18:40	23.26	25.7	3.21885	-23.7105	-26.1978
2012-12-11 23:28:40	23.29	25.73	3.2258	-23.7411	-26.2283
2012-12-11 23:38:40	23.32	25.75	3.23274	-23.7717	-26.2487
2012-12-11 23:48:40	23.34	25.78	3.23969	-23.792	-26.2793	2012-12-11 23:48:40
2012-12-11 23:58:40	23.38	25.82	3.24663	-23.8328	-26.3201
2012-12-12 00:08:40	23.44	25.85	3.25358	-23.894	-26.3507
2012-12-12 00:18:40	23.43	25.88	3.26052	-23.8838	-26.3812
2012-12-12 00:28:40	23.47	25.9	3.26746	-23.9246	-26.4016
2012-12-12 00:38:40	23.5	25.93	3.27441	-23.9551	-26.4322
2012-12-12 00:48:40	23.51	25.95	3.28135	-23.9653	-26.4526	2012-12-12 00:48:40
2012-12-12 00:58:40	23.58	26.01	3.2883	-24.0367	-26.5138
2012-12-12 01:08:40	23.58	26.02	3.29524	-24.0367	-26.524
2012-12-12 01:18:40	23.58	26.02	3.30219	-24.0367	-26.524
2012-12-12 01:28:40	23.61	26.05	3.30913	-24.0673	-26.5545
2012-12-12 01:38:40	23.65	26.07	3.31608	-24.1081	-26.5749
2012-12-12 01:48:40	23.67	26.1	3.32302	-24.1284	-26.6055	2012-12-12 01:48:40
2012-12-12 01:58:40	23.7	26.12	3.32996	-24.159	-26.6259
2012-12-12 02:08:40	23.73	26.15	3.33691	-24.1896	-26.6565
2012-12-12 02:18:40	23.74	26.18	3.34385	-24.1998	-26.6871
2012-12-12 02:28:40	23.76	26.19	3.3508	-24.2202	-26.6972
2012-12-12 02:38:40	23.8	26.23	3.35774	-24.261	-26.738
2012-12-12 02:48:40	23.81	26.24	3.36469	-24.2712	-26.7482	2012-12-12 02:48:40
2012-12-12 02:58:40	23.87	26.3	3.37163	-24.3323	-26.8094
2012-12-12 03:08:40	23.78	26.21	3.37858	-24.2406	-26.7176
2012-12-12 03:18:40	23.8	26.23	3.38552	-24.261	-26.738
2012-12-12 03:28:40	23.8	26.23	3.39246	-24.261	-26.738
2012-12-12 03:38:40	23.88	26.32	3.39941	-24.3425	-26.8298
2012-12-12 03:48:40	23.86	26.29	3.40635	-24.3221	-26.7992	2012-12-12 03:48:40
2012-12-12 03:58:40	23.92	26.35	3.4133	-24.3833	-26.8603
2012-12-12 04:08:40	23.95	26.38	3.42024	-24.4139	-26.8909
2012-12-12 04:18:40	24	26.43	3.42719	-24.4648	-26.9419
2012-12-12 04:28:40	24.02	26.45	3.43413	-24.4852	-26.9623
2012-12-12 04:38:40	24.04	26.47	3.44108	-24.5056	-26.9827
2012-12-12 04:48:40	24.07	26.5	3.44802	-24.5362	-27.0133	2012-12-12 04:48:40
2012-12-12 04:58:40	24.08	26.52	3.45496	-24.5464	-27.0336
2012-12-12 05:08:40	24.11	26.55	3.46191	-24.577	-27.0642
2012-12-12 05:18:40	24.15	26.59	3.46885	-24.6177	-27.105
2012-12-12 05:28:40	24.18	26.61	3.4758	-24.6483	-27.1254
2012-12-12 05:38:40	24.19	26.63	3.48274	-24.6585	-27.1458
2012-12-12 05:48:40	24.23	26.66	3.48969	-24.6993	-27.1764	2012-12-12 05:48:40
2012-12-12 05:58:40	24.27	26.7	3.49663	-24.7401	-27.2171
2012-12-12 06:08:40	24.28	26.71	3.50358	-24.7503	-27.2273
2012-12-12 06:18:40	24.34	26.76	3.51052	-24.8114	-27.2783
2012-12-12 06:28:40	24.34	26.76	3.51746	-24.8114	-27.2783
2012-12-12 06:38:40	24.35	26.78	3.52441	-24.8216	-27.2987
2012-12-12 06:48:40	24.38	26.8	3.53135	-24.8522	-27.3191	2012-12-12 06:48:40
2012-12-12 06:58:40	24.42	26.84	3.5383	-24.893	-27.3598
2012-12-12 07:08:40	24.45	26.87	3.54524	-24.9235	-27.3904
2012-12-12 07:18:40	24.47	26.91	3.55219	-24.9439	-27.4312
2012-12-12 07:28:40	24.49	26.92	3.55913	-24.9643	-27.4414
2012-12-12 07:38:40	24.55	26.96	3.56608	-25.0255	-27.4822
2012-12-12 07:48:40	24.54	26.96	3.57302	-25.0153	-27.4822	2012-12-12 07:48:40
2012-12-12 07:58:40	24.58	27.01	3.57996	-25.0561	-27.5331
2012-12-12 08:08:40	24.61	27.05	3.58691	-25.0866	-27.5739
2012-12-12 08:18:40	24.64	27.06	3.59385	-25.1172	-27.5841
2012-12-12 08:28:40	24.62	27.05	3.6008	-25.0968	-27.5739
2012-12-12 08:38:40	24.67	27.1	3.60774	-25.1478	-27.6249
2012-12-12 08:48:40	24.7	27.13	3.61469	-25.1784	-27.6555	2012-12-12 08:48:40
2012-12-12 08:58:40	24.74	27.17	3.62163	-25.2192	-27.6962
2012-12-12 09:08:40	24.77	27.2	3.62858	-25.2497	-27.7268
2012-12-12 09:18:40	24.79	27.22	3.63552	-25.2701	-27.7472
2012-12-12 09:28:40	24.63	27.11	3.64246	-25.107	-27.6351
2012-12-12 09:38:40	24.77	27.23	3.64941	-25.2497	-27.7574
2012-12-12 09:48:40	24.83	27.28	3.65635	-25.3109	-27.8084	2012-12-12 09:48:40
2012-12-12 09:58:40	24.88	27.33	3.6633	-25.3619	-27.8593
2012-12-12 10:08:40	24.88	27.34	3.67024	-25.3619	-27.8695
2012-12-12 10:18:40	24.89	27.35	3.67719	-25.3721	-27.8797
2012-12-12 10:28:40	24.91	27.37	3.68413	-25.3925	-27.9001
2012-12-12 10:38:40	24.95	27.41	3.69108	-25.4332	-27.9409
2012-12-12 10:48:40	24.94	27.38	3.69802	-25.423	-27.9103	2012-12-12 10:48:40
2012-12-12 10:58:40	25	27.46	3.70496	-25.4842	-27.9918
2012-12-12 11:08:40	25.05	27.49	3.71191	-25.5352	-28.0224
2012-12-12 11:18:40	25.05	27.52	3.71885	-25.5352	-28.053
2012-12-12 11:28:40	25.12	27.57	3.7258	-25.6065	-28.104
2012-12-12 11:38:40	25.12	27.58	3.73274	-25.6065	-28.1142
2012-12-12 11:48:40	25.17	27.62	3.73969	-25.6575	-28.1549	2012-12-12 11:48:40
2012-12-12 11:58:40	25.19	27.65	3.74663	-25.6779	-28.1855
2012-12-12 12:08:40	25.2	27.65	3.75358	-25.6881	-28.1855
2012-12-12 12:18:40	25.23	27.68	3.76052	-25.7187	-28.2161
2012-12-12 12:28:40	25.26	27.71	3.76746	-25.7492	-28.2467
2012-12-12 12:38:40	25.31	27.76	3.77441	-25.8002	-28.2977
2012-12-12 12:48:40	25.33	27.78	3.78135	-25.8206	-28.318	2012-12-12 12:48:40
2012-12-12 12:58:40	25.24	27.7	3.7883	-25.7288	-28.2365
2012-12-12 13:08:40	25.27	27.71	3.79524	-25.7594	-28.2467
2012-12-12 13:18:40	25.31	27.77	3.80219	-25.8002	-28.3078
2012-12-12 13:28:40	25.37	27.81	3.80913	-25.8614	-28.3486
2012-12-12 13:38:40	25.39	27.84	3.81608	-25.8818	-28.3792
2012-12-12 13:48:40	25.43	27.88	3.82302	-25.9225	-28.42	2012-12-12 13:48:40
2012-12-12 13:58:40	25.48	27.93	3.82996	-25.9735	-28.4709
2012-12-12 14:08:40	25.51	27.95	3.83691	-26.0041	-28.4913
2012-12-12 14:18:40	25.52	27.96	3.84385	-26.0143	-28.5015
2012-12-12 14:28:40	25.56	28	3.8508	-26.055	-28.5423
2012-12-12 14:38:40	25.59	28.02	3.85774	-26.0856	-28.5627
2012-12-12 14:48:40	25.62	28.07	3.86469	-26.1162	-28.6137	2012-12-12 14:48:40
2012-12-12 14:58:40	25.64	28.08	3.87163	-26.1366	-28.6239
2012-12-12 15:08:40	25.64	28.1	3.87858	-26.1366	-28.6442
2012-12-12 15:18:40	25.68	28.13	3.88552	-26.1774	-28.6748
2012-12-12 15:28:40	25.74	28.17	3.89246	-26.2385	-28.7156
2012-12-12 15:38:40	25.76	28.21	3.89941	-26.2589	-28.7564
2012-12-12 15:48:40	25.8	28.25	3.90635	-26.2997	-28.7971	2012-12-12 15:48:40
2012-12-12 15:58:40	25.85	28.27	3.9133	-26.3507	-28.8175
2012-12-12 16:08:40	25.85	28.3	3.92024	-26.3507	-28.8481
2012-12-12 16:18:40	25.87	28.32	3.92719	-26.371	-28.8685
2012-12-12 16:28:40	25.88	28.32	3.93413	-26.3812	-28.8685
2012-12-12 16:38:40	25.92	28.37	3.94108	-26.422	-28.9195
2012-12-12 16:48:40	25.96	28.38	3.94802	-26.4628	-28.9297	2012-12-12 16:48:40
2012-12-12 16:58:40	25.97	28.41	3.95496	-26.473	-28.9602
2012-12-12 17:08:40	25.99	28.45	3.96191	-26.4934	-29.001
2012-12-12 17:18:40	26.03	28.47	3.96885	-26.5341	-29.0214
2012-12-12 17:28:40	26.05	28.5	3.9758	-26.5545	-29.052
2012-12-12 17:38:40	26.06	28.5	3.98274	-26.5647	-29.052
2012-12-12 17:48:40	26.09	28.53	3.98969	-26.5953	-29.0826	2012-12-12 17:48:40
2012-12-12 17:58:40	26.11	28.55	3.99663	-26.6157	-29.103
2012-12-12 18:08:40	26.13	28.58	4.00358	-26.6361	-29.1335
2012-12-12 18:18:40	26.16	28.6	4.01052	-26.6667	-29.1539
2012-12-12 18:28:40	26.18	28.63	4.01746	-26.6871	-29.1845
2012-12-12 18:38:40	26.24	28.67	4.02441	-26.7482	-29.2253
2012-12-12 18:48:40	26.24	28.67	4.03135	-26.7482	-29.2253	2012-12-12 18:48:40
2012-12-12 18:58:40	26.29	28.73	4.0383	-26.7992	-29.2864
2012-12-12 19:08:40	26.28	28.74	4.04524	-26.789	-29.2966
2012-12-12 19:18:40	26.35	28.79	4.05219	-26.8603	-29.3476
2012-12-12 19:28:40	26.38	28.81	4.05913	-26.8909	-29.368
2012-12-12 19:38:40	26.43	28.86	4.06608	-26.9419	-29.419
2012-12-12 19:48:40	26.44	28.88	4.07302	-26.9521	-29.4393	2012-12-12 19:48:40
2012-12-12 19:58:40	26.49	28.9	4.07996	-27.0031	-29.4597
2012-12-12 20:08:40	26.52	28.95	4.08691	-27.0336	-29.5107
2012-12-12 20:18:40	26.49	28.91	4.09385	-27.0031	-29.4699
2012-12-12 20:28:40	26.57	28.99	4.1008	-27.0846	-29.5515
2012-12-12 20:38:40	26.53	28.93	4.10774	-27.0438	-29.4903
2012-12-12 20:48:40	26.6	29.03	4.11469	-27.1152	-29.5923	2012-12-12 20:48:40
2012-12-12 20:58:40	26.63	29.07	4.12163	-27.1458	-29.633
2012-12-12 21:08:40	26.67	29.09	4.12858	-27.1865	-29.6534
2012-12-12 21:18:40	26.68	29.11	4.13552	-27.1967	-29.6738
2012-12-12 21:28:40	26.72	29.15	4.14246	-27.2375	-29.7146
2012-12-12 21:38:40	26.76	29.2	4.14941	-27.2783	-29.7655
2012-12-12 21:48:40	26.81	29.24	4.15635	-27.3293	-29.8063	2012-12-12 21:48:40
2012-12-12 21:58:40	26.82	29.26	4.1633	-27.3394	-29.8267
2012-12-12 22:08:40	26.87	29.3	4.17024	-27.3904	-29.8675
2012-12-12 22:18:40	26.89	29.32	4.17719	-27.4108	-29.8879
2012-12-12 22:28:40	26.93	29.36	4.18413	-27.4516	-29.9286
2012-12-12 22:38:40	26.96	29.39	4.19108	-27.4822	-29.9592
2012-12-12 22:48:40	27	29.42	4.19802	-27.5229	-29.9898	2012-12-12 22:48:40
2012-12-12 22:58:40	26.99	29.42	4.20496	-27.5127	-29.9898
2012-12-12 23:08:40	27.01	29.45	4.21191	-27.5331	-30.0204
2012-12-12 23:18:40	27.06	29.5	4.21885	-27.5841	-30.0714
2012-12-12 23:28:40	27.11	29.52	4.2258	-27.6351	-30.0917
2012-12-12 23:38:40	27.12	29.55	4.23274	-27.6453	-30.1223
2012-12-12 23:48:40	27.15	29.58	4.23969	-27.6758	-30.1529	2012-12-12 23:48:40
2012-12-12 23:58:40	27.18	29.61	4.24663	-27.7064	-30.1835
2012-12-13 00:08:40	27.22	29.66	4.25358	-27.7472	-30.2345
2012-12-13 00:18:40	27.26	29.68	4.26052	-27.788	-30.2548
2012-12-13 00:28:40	27.28	29.72	4.26746	-27.8084	-30.2956
2012-12-13 00:38:40	27.32	29.75	4.27441	-27.8491	-30.3262
2012-12-13 00:48:40	27.36	29.76	4.28135	-27.8899	-30.3364	2012-12-13 00:48:40
2012-12-13 00:58:40	27.38	29.77	4.2883	-27.9103	-30.3466
2012-12-13 01:08:40	27.4	29.83	4.29524	-27.9307	-30.4077
2012-12-13 01:18:40	27.43	29.87	4.30219	-27.9613	-30.4485
2012-12-13 01:28:40	27.46	29.89	4.30913	-27.9918	-30.4689
2012-12-13 01:38:40	27.51	29.94	4.31608	-28.0428	-30.5199
2012-12-13 01:48:40	27.53	29.96	4.32302	-28.0632	-30.5403	2012-12-13 01:48:40
2012-12-13 01:58:40	27.57	30.01	4.32996	-28.104	-30.5912
2012-12-13 02:08:40	27.6	30.03	4.33691	-28.1346	-30.6116
2012-12-13 02:18:40	27.63	30.06	4.34385	-28.1651	-30.6422
2012-12-13 02:28:40	27.66	30.09	4.3508	-28.1957	-30.6728
2012-12-13 02:38:40	27.71	30.13	4.35774	-28.2467	-30.7136
2012-12-13 02:48:40	27.74	30.16	4.36469	-28.2773	-30.7441	2012-12-13 02:48:40
2012-12-13 02:58:40	27.74	30.17	4.37163	-28.2773	-30.7543
2012-12-13 03:08:40	27.77	30.19	4.37858	-28.3078	-30.7747
2012-12-13 03:18:40	27.79	30.22	4.38552	-28.3282	-30.8053
2012-12-13 03:28:40	27.83	30.26	4.39246	-28.369	-30.8461
2012-12-13 03:38:40	27.87	30.29	4.39941	-28.4098	-30.8767
2012-12-13 03:48:40	27.88	30.3	4.40635	-28.42	-30.8869	2012-12-13 03:48:40
2012-12-13 03:58:40	27.92	30.35	4.4133	-28.4608	-30.9378
2012-12-13 04:08:40	27.97	30.38	4.42024	-28.5117	-30.9684
2012-12-13 04:18:40	28	30.42	4.42719	-28.5423	-31.0092
2012-12-13 04:28:40	28.02	30.45	4.43413	-28.5627	-31.0398
2012-12-13 04:38:40	28.06	30.49	4.44108	-28.6035	-31.0805
2012-12-13 04:48:40	28.07	30.5	4.44802	-28.6137	-31.0907	2012-12-13 04:48:40
2012-12-13 04:58:40	28.13	30.54	4.45496	-28.6748	-31.1315
2012-12-13 05:08:40	28.15	30.57	4.46191	-28.6952	-31.1621
2012-12-13 05:18:40	28.19	30.61	4.46885	-28.736	-31.2029
2012-12-13 05:28:40	28.24	30.64	4.4758	-28.787	-31.2334
2012-12-13 05:38:40	28.24	30.69	4.48274	-28.787	-31.2844
2012-12-13 05:48:40	28.3	30.72	4.48969	-28.8481	-31.315	2012-12-13 05:48:40
2012-12-13 05:58:40	28.32	30.75	4.49663	-28.8685	-31.3456
2012-12-13 06:08:40	28.35	30.78	4.50358	-28.8991	-31.3761
2012-12-13 06:18:40	28.39	30.82	4.51052	-28.9399	-31.4169
2012-12-13 06:28:40	28.43	30.85	4.51746	-28.9806	-31.4475
2012-12-13 06:38:40	28.47	30.9	4.52441	-29.0214	-31.4985
2012-12-13 06:48:40	28.5	30.93	4.53135	-29.052	-31.5291	2012-12-13 06:48:40
2012-12-13 06:58:40	28.53	30.94	4.5383	-29.0826	-31.5392
2012-12-13 07:08:40	28.57	30.97	4.54524	-29.1233	-31.5698
2012-12-13 07:18:40	28.58	31.01	4.55219	-29.1335	-31.6106
2012-12-13 07:28:40	28.62	31.05	4.55913	-29.1743	-31.6514
2012-12-13 07:38:40	28.66	31.09	4.56608	-29.2151	-31.6922
2012-12-13 07:48:40	28.71	31.13	4.57302	-29.2661	-31.7329	2012-12-13 07:48:40
2012-12-13 07:58:40	28.73	31.13	4.57996	-29.2864	-31.7329
2012-12-13 08:08:40	28.77	31.18	4.58691	-29.3272	-31.7839
2012-12-13 08:18:40	28.81	31.22	4.59385	-29.368	-31.8247
2012-12-13 08:28:40	28.83	31.26	4.6008	-29.3884	-31.8654
2012-12-13 08:38:40	28.87	31.28	4.60774	-29.4292	-31.8858
2012-12-13 08:48:40	28.87	31.3	4.61469	-29.4292	-31.9062	2012-12-13 08:48:40
2012-12-13 08:58:40	28.91	31.34	4.62163	-29.4699	-31.947
2012-12-13 09:08:40	28.95	31.37	4.62858	-29.5107	-31.9776
2012-12-13 09:18:40	29	31.42	4.63552	-29.5617	-32.0285
2012-12-13 09:28:40	29.03	31.44	4.64246	-29.5923	-32.0489
2012-12-13 09:38:40	29.04	31.46	4.64941	-29.6024	-32.0693
2012-12-13 09:48:40	29.06	31.5	4.65635	-29.6228	-32.1101	2012-12-13 09:48:40
2012-12-13 09:58:40	28.92	31.35	4.6633	-29.4801	-31.9572
2012-12-13 10:08:40	29.07	31.51	4.67024	-29.633	-32.1203
2012-12-13 10:18:40	29.1	31.54	4.67719	-29.6636	-32.1509
2012-12-13 10:28:40	29.16	31.61	4.68413	-29.7248	-32.2222
2012-12-13 10:38:40	29.2	31.64	4.69108	-29.7655	-32.2528
2012-12-13 10:48:40	29.24	31.68	4.69802	-29.8063	-32.2936	2012-12-13 10:48:40
2012-12-13 10:58:40	29.24	31.69	4.70496	-29.8063	-32.3038
2012-12-13 11:08:40	29.29	31.74	4.71191	-29.8573	-32.3547
2012-12-13 11:18:40	29.31	31.75	4.71885	-29.8777	-32.3649
2012-12-13 11:28:40	29.38	31.81	4.7258	-29.949	-32.4261
2012-12-13 11:38:40	29.38	31.85	4.73274	-29.949	-32.4669
2012-12-13 11:48:40	29.43	31.87	4.73969	-30	-32.4873	2012-12-13 11:48:40
2012-12-13 11:58:40	29.45	31.89	4.74663	-30.0204	-32.5076
2012-12-13 12:08:40	29.49	31.93	4.75358	-30.0612	-32.5484
2012-12-13 12:18:40	29.53	31.97	4.76052	-30.1019	-32.5892
2012-12-13 12:28:40	29.56	32.03	4.76746	-30.1325	-32.6504
2012-12-13 12:38:40	29.61	32.05	4.77441	-30.1835	-32.6707
2012-12-13 12:48:40	29.64	32.11	4.78135	-30.2141	-32.7319	2012-12-13 12:48:40
2012-12-13 12:58:40	29.66	32.09	4.7883	-30.2345	-32.7115
2012-12-13 13:08:40	29.25	31.68	4.79524	-29.8165	-32.2936
2012-12-13 13:18:40	29.33	31.77	4.80219	-29.8981	-32.3853
2012-12-13 13:28:40	29.54	31.97	4.80913	-30.1121	-32.5892
2012-12-13 13:38:40	29.72	32.12	4.81608	-30.2956	-32.7421
2012-12-13 13:48:40	29.78	32.18	4.82302	-30.3568	-32.8033	2012-12-13 13:48:40
2012-12-13 13:58:40	29.82	32.25	4.82996	-30.3976	-32.8746
2012-12-13 14:08:40	29.76	32.17	4.83691	-30.3364	-32.7931
2012-12-13 14:18:40	29.81	32.22	4.84385	-30.3874	-32.844
2012-12-13 14:28:40	29.9	32.29	4.8508	-30.4791	-32.9154
2012-12-13 14:38:40	29.93	32.34	4.85774	-30.5097	-32.9664
2012-12-13 14:48:40	29.99	32.4	4.86469	-30.5708	-33.0275	2012-12-13 14:48:40
2012-12-13 14:58:40	30.08	32.47	4.87163	-30.6626	-33.0989
2012-12-13 15:08:40	30.13	32.53	4.87858	-30.7136	-33.16
2012-12-13 15:18:40	30.21	32.62	4.88552	-30.7951	-33.2518
2012-12-13 15:28:40	30.26	32.63	4.89246	-30.8461	-33.262
2012-12-13 15:38:40	30.27	32.67	4.89941	-30.8563	-33.3028
2012-12-13 15:48:40	30.36	32.78	4.90635	-30.948	-33.4149	2012-12-13 15:48:40
2012-12-13 15:58:40	30.4	32.8	4.9133	-30.9888	-33.4353
2012-12-13 16:08:40	30.44	32.81	4.92024	-31.0296	-33.4455
2012-12-13 16:18:40	30.5	32.89	4.92719	-31.0907	-33.527
2012-12-13 16:28:40	30.57	32.97	4.93413	-31.1621	-33.6086
2012-12-13 16:38:40	30.63	33.02	4.94108	-31.2232	-33.6595
2012-12-13 16:48:40	30.71	33.08	4.94802	-31.3048	-33.7207	2012-12-13 16:48:40
2012-12-13 16:58:40	30.74	33.13	4.95496	-31.3354	-33.7717
2012-12-13 17:08:40	30.79	33.2	4.96191	-31.3863	-33.843
2012-12-13 17:18:40	30.84	33.23	4.96885	-31.4373	-33.8736
2012-12-13 17:28:40	30.9	33.29	4.9758	-31.4985	-33.9348
2012-12-13 17:38:40	30.95	33.32	4.98274	-31.5494	-33.9653
2012-12-13 17:48:40	31.01	33.4	4.98969	-31.6106	-34.0469	2012-12-13 17:48:40
2012-12-13 17:58:40	31.06	33.45	4.99663	-31.6616	-34.0979
2012-12-13 18:08:40	31.12	33.51	5.00358	-31.7227	-34.159
2012-12-13 18:18:40	31.16	33.55	5.01052	-31.7635	-34.1998
2012-12-13 18:28:40	31.22	33.61	5.01746	-31.8247	-34.261
2012-12-13 18:38:40	31.29	33.68	5.02441	-31.896	-34.3323
2012-12-13 18:48:40	31.33	33.73	5.03135	-31.9368	-34.3833	2012-12-13 18:48:40
2012-12-13 18:58:40	31.39	33.79	5.0383	-31.998	-34.4444
2012-12-13 19:08:40	31.47	33.84	5.04524	-32.0795	-34.4954
2012-12-13 19:18:40	31.56	33.93	5.05219	-32.1713	-34.5872
2012-12-13 19:28:40	31.57	33.96	5.05913	-32.1814	-34.6177
2012-12-13 19:38:40	31.62	34.02	5.06608	-32.2324	-34.6789
2012-12-13 19:48:40	31.66	34.07	5.07302	-32.2732	-34.7299	2012-12-13 19:48:40
2012-12-13 19:58:40	31.72	34.1	5.07996	-32.3344	-34.7604
2012-12-13 20:08:40	31.78	34.17	5.08691	-32.3955	-34.8318
2012-12-13 20:18:40	31.82	34.22	5.09385	-32.4363	-34.8828
2012-12-13 20:28:40	31.88	34.25	5.1008	-32.4975	-34.9134
2012-12-13 20:38:40	31.93	34.33	5.10774	-32.5484	-34.9949
2012-12-13 20:48:40	32	34.39	5.11469	-32.6198	-35.0561	2012-12-13 20:48:40
2012-12-13 20:58:40	32.06	34.45	5.12163	-32.6809	-35.1172
2012-12-13 21:08:40	32.12	34.5	5.12858	-32.7421	-35.1682
2012-12-13 21:18:40	32.16	34.55	5.13552	-32.7829	-35.2192
2012-12-13 21:28:40	32.23	34.62	5.14246	-32.8542	-35.2905
2012-12-13 21:38:40	32.28	34.68	5.14941	-32.9052	-35.3517
2012-12-13 21:48:40	32.36	34.73	5.15635	-32.9867	-35.4027	2012-12-13 21:48:40
2012-12-13 21:58:40	32.4	34.79	5.1633	-33.0275	-35.4638
2012-12-13 22:08:40	32.41	34.8	5.17024	-33.0377	-35.474
2012-12-13 22:18:40	32.51	34.89	5.17719	-33.1397	-35.5657
2012-12-13 22:28:40	32.56	34.93	5.18413	-33.1906	-35.6065
2012-12-13 22:38:40	32.6	34.98	5.19108	-33.2314	-35.6575
2012-12-13 22:48:40	32.65	35.02	5.19802	-33.2824	-35.6983	2012-12-13 22:48:40
2012-12-13 22:58:40	32.69	35.06	5.20496	-33.3231	-35.739
2012-12-13 23:08:40	32.73	35.11	5.21191	-33.3639	-35.79
2012-12-13 23:18:40	32.79	35.16	5.21885	-33.4251	-35.841
2012-12-13 23:28:40	32.85	35.22	5.2258	-33.4862	-35.9021
2012-12-13 23:38:40	32.9	35.27	5.23274	-33.5372	-35.9531
2012-12-13 23:48:40	32.95	35.3	5.23969	-33.5882	-35.9837	2012-12-13 23:48:40
2012-12-13 23:58:40	32.98	35.35	5.24663	-33.6188	-36.0347
2012-12-14 00:08:40	33.04	35.41	5.25358	-33.6799	-36.0958
2012-12-14 00:18:40	33.06	35.43	5.26052	-33.7003	-36.1162
2012-12-14 00:28:40	33.11	35.48	5.26746	-33.7513	-36.1672
2012-12-14 00:38:40	33.19	35.53	5.27441	-33.8328	-36.2181
2012-12-14 00:48:40	33.23	35.6	5.28135	-33.8736	-36.2895	2012-12-14 00:48:40
2012-12-14 00:58:40	33.28	35.65	5.2883	-33.9246	-36.3405
2012-12-14 01:08:40	33.33	35.68	5.29524	-33.9755	-36.371
2012-12-14 01:18:40	33.38	35.73	5.30219	-34.0265	-36.422
2012-12-14 01:28:40	33.43	35.8	5.30913	-34.0775	-36.4934
2012-12-14 01:38:40	33.48	35.83	5.31608	-34.1284	-36.524
2012-12-14 01:48:40	33.52	35.89	5.32302	-34.1692	-36.5851	2012-12-14 01:48:40
2012-12-14 01:58:40	33.6	35.97	5.32996	-34.2508	-36.6667
2012-12-14 02:08:40	33.64	36.02	5.33691	-34.2915	-36.7176
2012-12-14 02:18:40	33.71	36.08	5.34385	-34.3629	-36.7788
2012-12-14 02:28:40	33.75	36.12	5.3508	-34.4037	-36.8196
2012-12-14 02:38:40	33.82	36.18	5.35774	-34.475	-36.8807
2012-12-14 02:48:40	33.89	36.25	5.36469	-34.5464	-36.9521	2012-12-14 02:48:40
2012-12-14 02:58:40	33.95	36.3	5.37163	-34.6075	-37.0031
2012-12-14 03:08:40	33.97	36.33	5.37858	-34.6279	-37.0336
2012-12-14 03:18:40	34.04	36.41	5.38552	-34.6993	-37.1152
2012-12-14 03:28:40	34.09	36.45	5.39246	-34.7503	-37.156
2012-12-14 03:38:40	34.15	36.52	5.39941	-34.8114	-37.2273
2012-12-14 03:48:40	34.19	36.55	5.40635	-34.8522	-37.2579	2012-12-14 03:48:40
2012-12-14 03:58:40	34.25	36.62	5.4133	-34.9134	-37.3293
2012-12-14 04:08:40	34.32	36.69	5.42024	-34.9847	-37.4006
2012-12-14 04:18:40	34.35	36.73	5.42719	-35.0153	-37.4414
2012-12-14 04:28:40	34.44	36.78	5.43413	-35.107	-37.4924
2012-12-14 04:38:40	34.47	36.85	5.44108	-35.1376	-37.5637
2012-12-14 04:48:40	34.52	36.89	5.44802	-35.1886	-37.6045	2012-12-14 04:48:40
2012-12-14 04:58:40	34.59	36.96	5.45496	-35.2599	-37.6758
2012-12-14 05:08:40	34.66	37.03	5.46191	-35.3313	-37.7472
2012-12-14 05:18:40	34.72	37.08	5.46885	-35.3925	-37.7982
2012-12-14 05:28:40	34.78	37.14	5.4758	-35.4536	-37.8593
2012-12-14 05:38:40	34.84	37.19	5.48274	-35.5148	-37.9103
2012-12-14 05:48:40	34.87	37.23	5.48969	-35.5454	-37.9511	2012-12-14 05:48:40
2012-12-14 05:58:40	34.92	37.29	5.49663	-35.5963	-38.0122
2012-12-14 06:08:40	35	37.36	5.50358	-35.6779	-38.0836
2012-12-14 06:18:40	35.06	37.43	5.51052	-35.739	-38.1549
2012-12-14 06:28:40	35.13	37.5	5.51746	-35.8104	-38.2263
2012-12-14 06:38:40	35.2	37.56	5.52441	-35.8818	-38.2875
2012-12-14 06:48:40	35.25	37.62	5.53135	-35.9327	-38.3486	2012-12-14 06:48:40
2012-12-14 06:58:40	35.32	37.68	5.5383	-36.0041	-38.4098
2012-12-14 07:08:40	35.37	37.74	5.54524	-36.055	-38.4709
2012-12-14 07:18:40	35.41	37.78	5.55219	-36.0958	-38.5117
2012-12-14 07:28:40	35.48	37.85	5.55913	-36.1672	-38.5831
2012-12-14 07:38:40	35.57	37.92	5.56608	-36.2589	-38.6544
2012-12-14 07:48:40	35.6	37.96	5.57302	-36.2895	-38.6952	2012-12-14 07:48:40
2012-12-14 07:58:40	35.63	37.99	5.57996	-36.3201	-38.7258
2012-12-14 08:08:40	35.61	37.99	5.58691	-36.2997	-38.7258
2012-12-14 08:18:40	35.65	38.02	5.59385	-36.3405	-38.7564
2012-12-14 08:28:40	35.67	38.04	5.6008	-36.3609	-38.7768
2012-12-14 08:38:40	35.75	38.12	5.60774	-36.4424	-38.8583
2012-12-14 08:48:40	35.8	38.16	5.61469	-36.4934	-38.8991	2012-12-14 08:48:40
2012-12-14 08:58:40	35.87	38.21	5.62163	-36.5647	-38.9501
2012-12-14 09:08:40	35.92	38.28	5.62858	-36.6157	-39.0214
2012-12-14 09:18:40	35.96	38.32	5.63552	-36.6565	-39.0622
2012-12-14 09:28:40	35.96	38.31	5.64246	-36.6565	-39.052
2012-12-14 09:38:40	36.06	38.42	5.64941	-36.7584	-39.1641
2012-12-14 09:48:40	36.11	38.47	5.65635	-36.8094	-39.2151	2012-12-14 09:48:40
2012-12-14 09:58:40	36.17	38.55	5.6633	-36.8705	-39.2966
2012-12-14 10:08:40	36.26	38.61	5.67024	-36.9623	-39.3578
2012-12-14 10:18:40	36.32	38.68	5.67719	-37.0234	-39.4292
2012-12-14 10:28:40	36.39	38.75	5.68413	-37.0948	-39.5005
2012-12-14 10:38:40	36.44	38.81	5.69108	-37.1458	-39.5617
2012-12-14 10:48:40	36.51	38.87	5.69802	-37.2171	-39.6228	2012-12-14 10:48:40
2012-12-14 10:58:40	36.56	38.91	5.70496	-37.2681	-39.6636
2012-12-14 11:08:40	36.61	38.96	5.71191	-37.3191	-39.7146
2012-12-14 11:18:40	36.65	39.01	5.71885	-37.3598	-39.7655
2012-12-14 11:28:40	36.7	39.05	5.7258	-37.4108	-39.8063
2012-12-14 11:38:40	36.77	39.12	5.73274	-37.4822	-39.8777
2012-12-14 11:48:40	36.82	39.17	5.73969	-37.5331	-39.9286	2012-12-14 11:48:40
2012-12-14 11:58:40	36.9	39.26	5.74663	-37.6147	-40.0204
2012-12-14 12:08:40	36.94	39.3	5.75358	-37.6555	-40.0612
2012-12-14 12:18:40	37.02	39.34	5.76052	-37.737	-40.1019
2012-12-14 12:28:40	37.06	39.41	5.76746	-37.7778	-40.1733
2012-12-14 12:38:40	37.13	39.49	5.77441	-37.8491	-40.2548
2012-12-14 12:48:40	37.19	39.54	5.78135	-37.9103	-40.3058	2012-12-14 12:48:40
2012-12-14 12:58:40	37.26	39.61	5.7883	-37.9817	-40.3772
2012-12-14 13:08:40	37.31	39.66	5.79524	-38.0326	-40.4281
2012-12-14 13:18:40	37.37	39.72	5.80219	-38.0938	-40.4893
2012-12-14 13:28:40	37.44	39.78	5.80913	-38.1651	-40.5505
2012-12-14 13:38:40	37.52	39.86	5.81608	-38.2467	-40.632
2012-12-14 13:48:40	37.58	39.92	5.82302	-38.3078	-40.6932	2012-12-14 13:48:40
2012-12-14 13:58:40	37.63	39.99	5.82996	-38.3588	-40.7645
2012-12-14 14:08:40	37.67	40.03	5.83691	-38.3996	-40.8053
2012-12-14 14:18:40	37.76	40.09	5.84385	-38.4913	-40.8665
2012-12-14 14:28:40	37.83	40.17	5.8508	-38.5627	-40.948
2012-12-14 14:38:40	37.88	40.23	5.85774	-38.6137	-41.0092
2012-12-14 14:48:40	37.93	40.28	5.86469	-38.6646	-41.0601	2012-12-14 14:48:40
2012-12-14 14:58:40	38	40.34	5.87163	-38.736	-41.1213
2012-12-14 15:08:40	38.07	40.42	5.87858	-38.8073	-41.2029
2012-12-14 15:18:40	38.12	40.48	5.88552	-38.8583	-41.264
2012-12-14 15:28:40	38.2	40.54	5.89246	-38.9399	-41.3252
2012-12-14 15:38:40	38.26	40.6	5.89941	-39.001	-41.3863
2012-12-14 15:48:40	38.32	40.67	5.90635	-39.0622	-41.4577	2012-12-14 15:48:40
2012-12-14 15:58:40	38.41	40.74	5.9133	-39.1539	-41.5291
2012-12-14 16:08:40	38.46	40.79	5.92024	-39.2049	-41.58
2012-12-14 16:18:40	38.55	40.87	5.92719	-39.2966	-41.6616
2012-12-14 16:28:40	38.62	40.94	5.93413	-39.368	-41.7329
2012-12-14 16:38:40	38.66	41	5.94108	-39.4088	-41.7941
2012-12-14 16:48:40	38.74	41.07	5.94802	-39.4903	-41.8654	2012-12-14 16:48:40
2012-12-14 16:58:40	38.81	41.13	5.95496	-39.5617	-41.9266
2012-12-14 17:08:40	38.9	41.23	5.96191	-39.6534	-42.0285
2012-12-14 17:18:40	38.94	41.29	5.96885	-39.6942	-42.0897
2012-12-14 17:28:40	39.05	41.35	5.9758	-39.8063	-42.1509
2012-12-14 17:38:40	39.07	41.41	5.98274	-39.8267	-42.212
2012-12-14 17:48:40	39.19	41.52	5.98969	-39.949	-42.3242	2012-12-14 17:48:40
2012-12-14 17:58:40	39.24	41.58	5.99663	-40	-42.3853
2012-12-14 18:08:40	39.35	41.66	6.00358	-40.1121	-42.4669
2012-12-14 18:18:40	39.43	41.74	6.01052	-40.1937	-42.5484
2012-12-14 18:28:40	39.48	41.8	6.01746	-40.2446	-42.6096
2012-12-14 18:38:40	39.56	41.89	6.02441	-40.3262	-42.7013
2012-12-14 18:48:40	39.65	42	6.03135	-40.4179	-42.8135	2012-12-14 18:48:40
2012-12-14 18:58:40	39.79	42.13	6.0383	-40.5607	-42.946
2012-12-14 19:08:40	39.77	42.13	6.04524	-40.5403	-42.946
2012-12-14 19:18:40	39.57	41.93	6.05219	-40.3364	-42.7421
2012-12-14 19:28:40	39.84	42.18	6.05913	-40.6116	-42.9969
2012-12-14 19:38:40	39.93	42.25	6.06608	-40.7034	-43.0683
2012-12-14 19:48:40	40.02	42.34	6.07302	-40.7951	-43.16	2012-12-14 19:48:40
2012-12-14 19:58:40	40.1	42.4	6.07996	-40.8767	-43.2212
2012-12-14 20:08:40	40.05	42.38	6.08691	-40.8257	-43.2008
2012-12-14 20:18:40	40.15	42.49	6.09385	-40.9276	-43.3129
2012-12-14 20:28:40	40.24	42.55	6.1008	-41.0194	-43.3741
2012-12-14 20:38:40	40.36	42.68	6.10774	-41.1417	-43.5066
2012-12-14 20:48:40	40.42	42.72	6.11469	-41.2029	-43.5474	2012-12-14 20:48:40
2012-12-14 20:58:40	40.48	42.8	6.12163	-41.264	-43.629
2012-12-14 21:08:40	40.59	42.87	6.12858	-41.3761	-43.7003
2012-12-14 21:18:40	40.67	42.99	6.13552	-41.4577	-43.8226
2012-12-14 21:28:40	40.72	43.03	6.14246	-41.5087	-43.8634
2012-12-14 21:38:40	40.83	43.15	6.14941	-41.6208	-43.9857
2012-12-14 21:48:40	40.9	43.22	6.15635	-41.6922	-44.0571	2012-12-14 21:48:40
2012-12-14 21:58:40	41	43.31	6.1633	-41.7941	-44.1488
2012-12-14 22:08:40	41.06	43.38	6.17024	-41.8552	-44.2202
2012-12-14 22:18:40	41.14	43.47	6.17719	-41.9368	-44.3119
2012-12-14 22:28:40	41.25	43.56	6.18413	-42.0489	-44.4037
2012-12-14 22:38:40	41.3	43.61	6.19108	-42.0999	-44.4546
2012-12-14 22:48:40	41.4	43.72	6.19802	-42.2018	-44.5668	2012-12-14 22:48:40
2012-12-14 22:58:40	41.47	43.79	6.20496	-42.2732	-44.6381
2012-12-14 23:08:40	41.56	43.88	6.21191	-42.3649	-44.7299
2012-12-14 23:18:40	41.63	43.95	6.21885	-42.4363	-44.8012
2012-12-14 23:28:40	41.69	44.03	6.2258	-42.4975	-44.8828
2012-12-14 23:38:40	41.8	44.1	6.23274	-42.6096	-44.9541
2012-12-14 23:48:40	41.9	44.2	6.23969	-42.7115	-45.0561	2012-12-14 23:48:40
2012-12-14 23:58:40	41.99	44.31	6.24663	-42.8033	-45.1682
2012-12-15 00:08:40	42.03	44.34	6.25358	-42.844	-45.1988
2012-12-15 00:18:40	42.1	44.42	6.26052	-42.9154	-45.2803
2012-12-15 00:28:40	42.21	44.52	6.26746	-43.0275	-45.3823
2012-12-15 00:38:40	42.26	44.58	6.27441	-43.0785	-45.4434
2012-12-15 00:48:40	42.35	44.68	6.28135	-43.1702	-45.5454	2012-12-15 00:48:40
2012-12-15 00:58:40	42.4	44.7	6.2883	-43.2212	-45.5657
2012-12-15 01:08:40	42.51	44.84	6.29524	-43.3333	-45.7085
2012-12-15 01:18:40	42.6	44.92	6.30219	-43.4251	-45.79
2012-12-15 01:28:40	42.68	44.97	6.30913	-43.5066	-45.841
2012-12-15 01:38:40	42.74	45.07	6.31608	-43.5678	-45.9429
2012-12-15 01:48:40	42.82	45.14	6.32302	-43.6493	-46.0143	2012-12-15 01:48:40
2012-12-15 01:58:40	42.9	45.21	6.32996	-43.7309	-46.0856
2012-12-15 02:08:40	42.99	45.3	6.33691	-43.8226	-46.1774
2012-12-15 02:18:40	43.08	45.39	6.34385	-43.9144	-46.2691
2012-12-15 02:28:40	43.14	45.47	6.3508	-43.9755	-46.3507
2012-12-15 02:38:40	42.29	45.55	6.35774	-43.1091	-46.4322
2012-12-15 02:48:40	43.3	45.63	6.36469	-44.1386	-46.5138	2012-12-15 02:48:40
2012-12-15 02:58:40	43.4	45.71	6.37163	-44.2406	-46.5953
2012-12-15 03:08:40	43.47	45.8	6.37858	-44.3119	-46.6871
2012-12-15 03:18:40	43.55	45.86	6.38552	-44.3935	-46.7482
2012-12-15 03:28:40	43.65	45.97	6.39246	-44.4954	-46.8603
2012-12-15 03:38:40	43.7	46.03	6.39941	-44.5464	-46.9215
2012-12-15 03:48:40	43.8	46.08	6.40635	-44.6483	-46.9725	2012-12-15 03:48:40
2012-12-15 03:58:40	43.86	46.17	6.4133	-44.7095	-47.0642
2012-12-15 04:08:40	43.92	46.23	6.42024	-44.7706	-47.1254
2012-12-15 04:18:40	44.02	46.34	6.42719	-44.8726	-47.2375
2012-12-15 04:28:40	44.08	46.41	6.43413	-44.9337	-47.3089
2012-12-15 04:38:40	44.16	46.48	6.44108	-45.0153	-47.3802
2012-12-15 04:48:40	44.26	46.56	6.44802	-45.1172	-47.4618	2012-12-15 04:48:40
2012-12-15 04:58:40	44.33	46.65	6.45496	-45.1886	-47.5535
2012-12-15 05:08:40	44.42	46.73	6.46191	-45.2803	-47.6351
2012-12-15 05:18:40	44.49	46.8	6.46885	-45.3517	-47.7064
2012-12-15 05:28:40	44.57	46.85	6.4758	-45.4332	-47.7574
2012-12-15 05:38:40	44.63	46.94	6.48274	-45.4944	-47.8491
2012-12-15 05:48:40	44.72	47.02	6.48969	-45.5861	-47.9307	2012-12-15 05:48:40
2012-12-15 05:58:40	44.8	47.11	6.49663	-45.6677	-48.0224
2012-12-15 06:08:40	44.88	47.2	6.50358	-45.7492	-48.1142
2012-12-15 06:18:40	44.97	47.29	6.51052	-45.841	-48.2059
2012-12-15 06:28:40	45.06	47.38	6.51746	-45.9327	-48.2977
2012-12-15 06:38:40	45.16	47.46	6.52441	-46.0347	-48.3792
2012-12-15 06:48:40	45.24	47.56	6.53135	-46.1162	-48.4811	2012-12-15 06:48:40
2012-12-15 06:58:40	45.34	47.65	6.5383	-46.2181	-48.5729
2012-12-15 07:08:40	45.42	47.73	6.54524	-46.2997	-48.6544
2012-12-15 07:18:40	45.5	47.81	6.55219	-46.3812	-48.736
2012-12-15 07:28:40	45.58	47.89	6.55913	-46.4628	-48.8175
2012-12-15 07:38:40	45.65	47.98	6.56608	-46.5341	-48.9093
2012-12-15 07:48:40	45.76	48.07	6.57302	-46.6463	-49.001	2012-12-15 07:48:40
2012-12-15 07:58:40	45.85	48.16	6.57996	-46.738	-49.0928
2012-12-15 08:08:40	45.92	48.25	6.58691	-46.8094	-49.1845
2012-12-15 08:18:40	46.02	48.32	6.59385	-46.9113	-49.2559
2012-12-15 08:28:40	46.11	48.4	6.6008	-47.0031	-49.3374
2012-12-15 08:38:40	46.19	48.48	6.60774	-47.0846	-49.419
2012-12-15 08:48:40	46.28	48.57	6.61469	-47.1764	-49.5107	2012-12-15 08:48:40
2012-12-15 08:58:40	46.35	48.67	6.62163	-47.2477	-49.6126
2012-12-15 09:08:40	46.46	48.76	6.62858	-47.3598	-49.7044
2012-12-15 09:18:40	46.53	48.83	6.63552	-47.4312	-49.7757
2012-12-15 09:28:40	46.62	48.92	6.64246	-47.5229	-49.8675
2012-12-15 09:38:40	46.72	49.03	6.64941	-47.6249	-49.9796
2012-12-15 09:48:40	46.82	49.11	6.65635	-47.7268	-50.0612	2012-12-15 09:48:40
2012-12-15 09:58:40	46.9	49.21	6.6633	-47.8084	-50.1631
2012-12-15 10:08:40	46.98	49.28	6.67024	-47.8899	-50.2345
2012-12-15 10:18:40	47.07	49.36	6.67719	-47.9817	-50.316
2012-12-15 10:28:40	47.14	49.44	6.68413	-48.053	-50.3976
2012-12-15 10:38:40	47.24	49.54	6.69108	-48.1549	-50.4995
2012-12-15 10:48:40	47.3	49.61	6.69802	-48.2161	-50.5708	2012-12-15 10:48:40
2012-12-15 10:58:40	47.36	49.66	6.70496	-48.2773	-50.6218
2012-12-15 11:08:40	47.47	49.78	6.71191	-48.3894	-50.7441
2012-12-15 11:18:40	47.57	49.86	6.71885	-48.4913	-50.8257
2012-12-15 11:28:40	47.64	49.94	6.7258	-48.5627	-50.9072
2012-12-15 11:38:40	47.7	50.01	6.73274	-48.6239	-50.9786
2012-12-15 11:48:40	47.69	49.99	6.73969	-48.6137	-50.9582	2012-12-15 11:48:40
2012-12-15 11:58:40	47.84	50.14	6.74663	-48.7666	-51.1111
2012-12-15 12:08:40	47.93	50.2	6.75358	-48.8583	-51.1723
2012-12-15 12:18:40	48.02	50.32	6.76052	-48.9501	-51.2946
2012-12-15 12:28:40	48.11	50.39	6.76746	-49.0418	-51.366
2012-12-15 12:38:40	48.18	50.47	6.77441	-49.1131	-51.4475
2012-12-15 12:48:40	48.22	50.5	6.78135	-49.1539	-51.4781	2012-12-15 12:48:40
2012-12-15 12:58:40	48.32	50.61	6.7883	-49.2559	-51.5902
2012-12-15 13:08:40	48.44	50.72	6.79524	-49.3782	-51.7023
2012-12-15 13:18:40	48.54	50.83	6.80219	-49.4801	-51.8145
2012-12-15 13:28:40	48.63	50.9	6.80913	-49.5719	-51.8858
2012-12-15 13:38:40	48.71	51	6.81608	-49.6534	-51.9878
2012-12-15 13:48:40	48.77	51.07	6.82302	-49.7146	-52.0591	2012-12-15 13:48:40
2012-12-15 13:58:40	48.88	51.13	6.82996	-49.8267	-52.1203
2012-12-15 14:08:40	48.94	51.25	6.83691	-49.8879	-52.2426
2012-12-15 14:18:40	49.08	51.35	6.84385	-50.0306	-52.3445
2012-12-15 14:28:40	49.16	51.45	6.8508	-50.1121	-52.4465
2012-12-15 14:38:40	49.25	51.55	6.85774	-50.2039	-52.5484
2012-12-15 14:48:40	49.33	51.62	6.86469	-50.2854	-52.6198	2012-12-15 14:48:40
2012-12-15 14:58:40	49.46	51.72	6.87163	-50.4179	-52.7217
2012-12-15 15:08:40	49.54	51.82	6.87858	-50.4995	-52.8236
2012-12-15 15:18:40	49.63	51.91	6.88552	-50.5912	-52.9154
2012-12-15 15:28:40	49.72	52.01	6.89246	-50.683	-53.0173
2012-12-15 15:38:40	49.8	51.58	6.89941	-50.7645	-52.579
2012-12-15 15:48:40	49.9	52.18	6.90635	-50.8665	-53.1906	2012-12-15 15:48:40
2012-12-15 15:58:40	49.97	52.27	6.9133	-50.9378	-53.2824
2012-12-15 16:08:40	50.09	52.37	6.92024	-51.0601	-53.3843
2012-12-15 16:18:40	50.18	52.47	6.92719	-51.1519	-53.4862
2012-12-15 16:28:40	50.28	52.58	6.93413	-51.2538	-53.5984
2012-12-15 16:38:40	50.39	52.65	6.94108	-51.366	-53.6697
2012-12-15 16:48:40	50.49	52.76	6.94802	-51.4679	-53.7819	2012-12-15 16:48:40
2012-12-15 16:58:40	50.58	52.85	6.95496	-51.5596	-53.8736
2012-12-15 17:08:40	50.66	52.95	6.96191	-51.6412	-53.9755
2012-12-15 17:18:40	50.77	53.05	6.96885	-51.7533	-54.0775
2012-12-15 17:28:40	50.86	53.14	6.9758	-51.8451	-54.1692
2012-12-15 17:38:40	50.94	53.22	6.98274	-51.9266	-54.2508
2012-12-15 17:48:40	51.03	53.32	6.98969	-52.0183	-54.3527	2012-12-15 17:48:40
2012-12-15 17:58:40	51.12	53.41	6.99663	-52.1101	-54.4444
2012-12-15 18:08:40	51.24	53.51	7.00358	-52.2324	-54.5464
2012-12-15 18:18:40	51.33	53.62	7.01052	-52.3242	-54.6585
2012-12-15 18:28:40	51.45	53.74	7.01746	-52.4465	-54.7808
2012-12-15 18:38:40	51.56	53.85	7.02441	-52.5586	-54.893
2012-12-15 18:48:40	51.68	53.96	7.03135	-52.6809	-55.0051	2012-12-15 18:48:40
2012-12-15 18:58:40	51.74	54.06	7.0383	-52.7421	-55.107
2012-12-15 19:08:40	51.9	54.19	7.04524	-52.9052	-55.2396
2012-12-15 19:18:40	52.04	54.31	7.05219	-53.0479	-55.3619
2012-12-15 19:28:40	52.13	54.42	7.05913	-53.1397	-55.474
2012-12-15 19:38:40	52.24	54.53	7.06608	-53.2518	-55.5861
2012-12-15 19:48:40	52.36	54.65	7.07302	-53.3741	-55.7085	2012-12-15 19:48:40
2012-12-15 19:58:40	52.47	54.74	7.07996	-53.4862	-55.8002
2012-12-15 20:08:40	52.59	54.87	7.08691	-53.6086	-55.9327
2012-12-15 20:18:40	52.7	54.99	7.09385	-53.7207	-56.055
2012-12-15 20:28:40	52.81	55.09	7.1008	-53.8328	-56.157
2012-12-15 20:38:40	52.91	55.2	7.10774	-53.9348	-56.2691
2012-12-15 20:48:40	53.03	55.31	7.11469	-54.0571	-56.3812	2012-12-15 20:48:40
2012-12-15 20:58:40	53.15	55.43	7.12163	-54.1794	-56.5036
2012-12-15 21:08:40	53.25	55.54	7.12858	-54.2813	-56.6157
2012-12-15 21:18:40	53.35	55.65	7.13552	-54.3833	-56.7278
2012-12-15 21:28:40	53.48	55.76	7.14246	-54.5158	-56.84
2012-12-15 21:38:40	53.58	55.87	7.14941	-54.6177	-56.9521
2012-12-15 21:48:40	53.7	55.99	7.15635	-54.7401	-57.0744	2012-12-15 21:48:40
2012-12-15 21:58:40	53.84	56.11	7.1633	-54.8828	-57.1967
2012-12-15 22:08:40	53.93	56.24	7.17024	-54.9745	-57.3293
2012-12-15 22:18:40	54.05	56.33	7.17719	-55.0968	-57.421
2012-12-15 22:28:40	54.18	56.45	7.18413	-55.2294	-57.5433
2012-12-15 22:38:40	54.3	56.58	7.19108	-55.3517	-57.6758
2012-12-15 22:48:40	54.42	56.72	7.19802	-55.474	-57.8186	2012-12-15 22:48:40
2012-12-15 22:58:40	54.53	56.8	7.20496	-55.5861	-57.9001
2012-12-15 23:08:40	54.66	56.95	7.21191	-55.7187	-58.053
2012-12-15 23:18:40	54.76	57.06	7.21885	-55.8206	-58.1651
2012-12-15 23:28:40	54.9	57.18	7.2258	-55.9633	-58.2875
2012-12-15 23:38:40	55.01	57.27	7.23274	-56.0754	-58.3792
2012-12-15 23:48:40	55.1	57.39	7.23969	-56.1672	-58.5015	2012-12-15 23:48:40
2012-12-15 23:58:40	55.22	57.51	7.24663	-56.2895	-58.6239
2012-12-16 00:08:40	55.36	57.64	7.25358	-56.4322	-58.7564
2012-12-16 00:18:40	55.45	57.73	7.26052	-56.524	-58.8481
2012-12-16 00:28:40	55.56	57.85	7.26746	-56.6361	-58.9704
2012-12-16 00:38:40	55.68	57.97	7.27441	-56.7584	-59.0928
2012-12-16 00:48:40	55.79	58.1	7.28135	-56.8705	-59.2253	2012-12-16 00:48:40
2012-12-16 00:58:40	55.94	58.23	7.2883	-57.0234	-59.3578
2012-12-16 01:08:40	56.07	58.35	7.29524	-57.156	-59.4801
2012-12-16 01:18:40	56.19	58.46	7.30219	-57.2783	-59.5923
2012-12-16 01:28:40	56.32	58.61	7.30913	-57.4108	-59.7452
2012-12-16 01:38:40	56.41	58.71	7.31608	-57.5025	-59.8471
2012-12-16 01:48:40	56.55	58.83	7.32302	-57.6453	-59.9694	2012-12-16 01:48:40
2012-12-16 01:58:40	56.68	58.96	7.32996	-57.7778	-60.1019
2012-12-16 02:08:40	56.81	59.08	7.33691	-57.9103	-60.2243
2012-12-16 02:18:40	56.92	59.21	7.34385	-58.0224	-60.3568
2012-12-16 02:28:40	57.05	59.33	7.3508	-58.1549	-60.4791
2012-12-16 02:38:40	57.16	59.46	7.35774	-58.2671	-60.6116
2012-12-16 02:48:40	57.32	59.58	7.36469	-58.4302	-60.7339	2012-12-16 02:48:40
2012-12-16 02:58:40	57.42	59.7	7.37163	-58.5321	-60.8563
2012-12-16 03:08:40	57.56	59.84	7.37858	-58.6748	-60.999
2012-12-16 03:18:40	57.68	59.94	7.38552	-58.7971	-61.1009
2012-12-16 03:28:40	57.78	60.08	7.39246	-58.8991	-61.2436
2012-12-16 03:38:40	57.86	60.17	7.39941	-58.9806	-61.3354
2012-12-16 03:48:40	58.04	60.31	7.40635	-59.1641	-61.4781	2012-12-16 03:48:40
2012-12-16 03:58:40	58.17	60.46	7.4133	-59.2966	-61.631
2012-12-16 04:08:40	58.29	60.59	7.42024	-59.419	-61.7635
2012-12-16 04:18:40	58.43	60.71	7.42719	-59.5617	-61.8858
2012-12-16 04:28:40	58.56	60.84	7.43413	-59.6942	-62.0183
2012-12-16 04:38:40	58.69	60.99	7.44108	-59.8267	-62.1713
2012-12-16 04:48:40	58.83	61.12	7.44802	-59.9694	-62.3038	2012-12-16 04:48:40
2012-12-16 04:58:40	58.96	61.26	7.45496	-60.1019	-62.4465
2012-12-16 05:08:40	59.12	61.38	7.46191	-60.265	-62.5688
2012-12-16 05:18:40	59.25	61.55	7.46885	-60.3976	-62.7421
2012-12-16 05:28:40	59.38	61.67	7.4758	-60.5301	-62.8644
2012-12-16 05:38:40	59.53	61.8	7.48274	-60.683	-62.9969
2012-12-16 05:48:40	59.67	61.97	7.48969	-60.8257	-63.1702	2012-12-16 05:48:40
2012-12-16 05:58:40	59.8	62.08	7.49663	-60.9582	-63.2824
2012-12-16 06:08:40	59.95	62.22	7.50358	-61.1111	-63.4251
2012-12-16 06:18:40	60.08	62.36	7.51052	-61.2436	-63.5678
2012-12-16 06:28:40	60.21	62.5	7.51746	-61.3761	-63.7105
2012-12-16 06:38:40	60.33	62.64	7.52441	-61.4985	-63.8532
2012-12-16 06:48:40	60.47	62.77	7.53135	-61.6412	-63.9857	2012-12-16 06:48:40
2012-12-16 06:58:40	60.63	62.91	7.5383	-61.8043	-64.1284
2012-12-16 07:08:40	60.77	63.06	7.54524	-61.947	-64.2813
2012-12-16 07:18:40	60.9	63.17	7.55219	-62.0795	-64.3935
2012-12-16 07:28:40	61.02	63.32	7.55913	-62.2018	-64.5464
2012-12-16 07:38:40	61.16	63.46	7.56608	-62.3445	-64.6891
2012-12-16 07:48:40	61.3	63.57	7.57302	-62.4873	-64.8012	2012-12-16 07:48:40
2012-12-16 07:58:40	61.43	63.71	7.57996	-62.6198	-64.9439
2012-12-16 08:08:40	61.56	63.84	7.58691	-62.7523	-65.0765
2012-12-16 08:18:40	61.71	64	7.59385	-62.9052	-65.2396
2012-12-16 08:28:40	61.85	64.14	7.6008	-63.0479	-65.3823
2012-12-16 08:38:40	61.97	64.26	7.60774	-63.1702	-65.5046
2012-12-16 08:48:40	62.15	64.41	7.61469	-63.3537	-65.6575	2012-12-16 08:48:40
2012-12-16 08:58:40	62.27	64.56	7.62163	-63.476	-65.8104
2012-12-16 09:08:40	62.4	64.69	7.62858	-63.6086	-65.9429
2012-12-16 09:18:40	62.53	64.83	7.63552	-63.7411	-66.0856
2012-12-16 09:28:40	62.68	64.98	7.64246	-63.894	-66.2385
2012-12-16 09:38:40	62.81	65.11	7.64941	-64.0265	-66.371
2012-12-16 09:48:40	62.95	65.23	7.65635	-64.1692	-66.4934	2012-12-16 09:48:40
2012-12-16 09:58:40	63.07	65.37	7.6633	-64.2915	-66.6361
2012-12-16 10:08:40	63.23	65.52	7.67024	-64.4546	-66.789
2012-12-16 10:18:40	63.35	65.66	7.67719	-64.577	-66.9317
2012-12-16 10:28:40	63.5	65.81	7.68413	-64.7299	-67.0846
2012-12-16 10:38:40	63.64	65.93	7.69108	-64.8726	-67.2069
2012-12-16 10:48:40	63.81	66.08	7.69802	-65.0459	-67.3598	2012-12-16 10:48:40
2012-12-16 10:58:40	63.97	66.26	7.70496	-65.209	-67.5433
2012-12-16 11:08:40	64.1	66.39	7.71191	-65.3415	-67.6758
2012-12-16 11:18:40	64.25	66.54	7.71885	-65.4944	-67.8287
2012-12-16 11:28:40	64.4	66.68	7.7258	-65.6473	-67.9715
2012-12-16 11:38:40	64.52	66.81	7.73274	-65.7696	-68.104
2012-12-16 11:48:40	64.61	66.94	7.73969	-65.8614	-68.2365	2012-12-16 11:48:40
2012-12-16 11:58:40	64.8	67.09	7.74663	-66.055	-68.3894
2012-12-16 12:08:40	64.97	67.26	7.75358	-66.2283	-68.5627
2012-12-16 12:18:40	65.12	67.4	7.76052	-66.3812	-68.7054
2012-12-16 12:28:40	65.26	67.54	7.76746	-66.524	-68.8481
2012-12-16 12:38:40	65.42	67.68	7.77441	-66.6871	-68.9908
2012-12-16 12:48:40	65.54	67.85	7.78135	-66.8094	-69.1641	2012-12-16 12:48:40
2012-12-16 12:58:40	65.7	67.99	7.7883	-66.9725	-69.3068
2012-12-16 13:08:40	65.84	68.15	7.79524	-67.1152	-69.4699
2012-12-16 13:18:40	66	68.29	7.80219	-67.2783	-69.6126
2012-12-16 13:28:40	66.14	68.43	7.80913	-67.421	-69.7554
2012-12-16 13:38:40	66.32	68.59	7.81608	-67.6045	-69.9185
2012-12-16 13:48:40	66.46	68.75	7.82302	-67.7472	-70.0815	2012-12-16 13:48:40
2012-12-16 13:58:40	66.54	68.91	7.82996	-67.8287	-70.2446
2012-12-16 14:08:40	66.74	69.03	7.83691	-68.0326	-70.367
2012-12-16 14:18:40	66.9	69.18	7.84385	-68.1957	-70.5199
2012-12-16 14:28:40	67.06	69.36	7.8508	-68.3588	-70.7034
2012-12-16 14:38:40	67.2	69.53	7.85774	-68.5015	-70.8767
2012-12-16 14:48:40	67.17	69.47	7.86469	-68.4709	-70.8155	2012-12-16 14:48:40
2012-12-16 14:58:40	67.4	69.68	7.87163	-68.7054	-71.0296
2012-12-16 15:08:40	67.58	69.87	7.87858	-68.8889	-71.2232
2012-12-16 15:18:40	67.73	70.02	7.88552	-69.0418	-71.3761
2012-12-16 15:28:40	67.89	70.18	7.89246	-69.2049	-71.5392
2012-12-16 15:38:40	68.03	70.34	7.89941	-69.3476	-71.7023
2012-12-16 15:48:40	68.18	70.48	7.90635	-69.5005	-71.8451	2012-12-16 15:48:40
2012-12-16 15:58:40	68.36	70.64	7.9133	-69.684	-72.0082
2012-12-16 16:08:40	68.51	70.81	7.92024	-69.8369	-72.1814
2012-12-16 16:18:40	68.67	70.96	7.92719	-70	-72.3344
2012-12-16 16:28:40	68.83	71.14	7.93413	-70.1631	-72.5178
2012-12-16 16:38:40	68.99	71.28	7.94108	-70.3262	-72.6606
2012-12-16 16:48:40	69.16	71.46	7.94802	-70.4995	-72.844	2012-12-16 16:48:40
2012-12-16 16:58:40	69.3	71.58	7.95496	-70.6422	-72.9664
2012-12-16 17:08:40	69.49	71.79	7.96191	-70.8359	-73.1804
2012-12-16 17:18:40	69.65	71.94	7.96885	-70.999	-73.3333
2012-12-16 17:28:40	69.83	72.13	7.9758	-71.1825	-73.527
2012-12-16 17:38:40	70.02	72.31	7.98274	-71.3761	-73.7105
2012-12-16 17:48:40	70.16	72.46	7.98969	-71.5189	-73.8634	2012-12-16 17:48:40
2012-12-16 17:58:40	70.35	72.63	7.99663	-71.7125	-74.0367
2012-12-16 18:08:40	70.54	72.82	8.00358	-71.9062	-74.2304
2012-12-16 18:18:40	70.69	72.99	8.01052	-72.0591	-74.4037
2012-12-16 18:28:40	70.87	73.17	8.01746	-72.2426	-74.5872
2012-12-16 18:38:40	71.03	73.33	8.02441	-72.4057	-74.7503
2012-12-16 18:48:40	71.22	73.52	8.03135	-72.5994	-74.9439	2012-12-16 18:48:40
2012-12-16 18:58:40	71.39	73.7	8.0383	-72.7727	-75.1274
2012-12-16 19:08:40	71.57	73.86	8.04524	-72.9562	-75.2905
2012-12-16 19:18:40	71.74	74.03	8.05219	-73.1295	-75.4638
2012-12-16 19:28:40	71.91	74.2	8.05913	-73.3028	-75.6371
2012-12-16 19:38:40	72.07	74.38	8.06608	-73.4659	-75.8206
2012-12-16 19:48:40	72.27	74.55	8.07302	-73.6697	-75.9939	2012-12-16 19:48:40
2012-12-16 19:58:40	72.39	74.69	8.07996	-73.792	-76.1366
2012-12-16 20:08:40	72.58	74.86	8.08691	-73.9857	-76.3099
2012-12-16 20:18:40	72.72	75.02	8.09385	-74.1284	-76.473
2012-12-16 20:28:40	72.91	75.18	8.1008	-74.3221	-76.6361
2012-12-16 20:38:40	73.08	75.38	8.10774	-74.4954	-76.84
2012-12-16 20:48:40	73.23	75.55	8.11469	-74.6483	-77.0133	2012-12-16 20:48:40
2012-12-16 20:58:40	73.44	75.72	8.12163	-74.8624	-77.1865
2012-12-16 21:08:40	73.58	75.89	8.12858	-75.0051	-77.3598
2012-12-16 21:18:40	73.75	76.06	8.13552	-75.1784	-77.5331
2012-12-16 21:28:40	73.97	76.26	8.14246	-75.4027	-77.737
2012-12-16 21:38:40	74.12	76.43	8.14941	-75.5556	-77.9103
2012-12-16 21:48:40	74.32	76.59	8.15635	-75.7594	-78.0734	2012-12-16 21:48:40
2012-12-16 21:58:40	74.48	76.78	8.1633	-75.9225	-78.2671
2012-12-16 22:08:40	74.66	76.95	8.17024	-76.106	-78.4404
2012-12-16 22:18:40	74.82	77.12	8.17719	-76.2691	-78.6137
2012-12-16 22:28:40	74.98	77.3	8.18413	-76.4322	-78.7971
2012-12-16 22:38:40	75.17	77.49	8.19108	-76.6259	-78.9908
2012-12-16 22:48:40	75.35	77.65	8.19802	-76.8094	-79.1539	2012-12-16 22:48:40
2012-12-16 22:58:40	75.52	77.84	8.20496	-76.9827	-79.3476
2012-12-16 23:08:40	75.7	78	8.21191	-77.1662	-79.5107
2012-12-16 23:18:40	75.84	78.16	8.21885	-77.3089	-79.6738
2012-12-16 23:28:40	75.99	78.33	8.2258	-77.4618	-79.8471
2012-12-16 23:38:40	76.18	78.5	8.23274	-77.6555	-80.0204
2012-12-16 23:48:40	76.33	78.65	8.23969	-77.8084	-80.1733	2012-12-16 23:48:40
2012-12-16 23:58:40	76.51	78.82	8.24663	-77.9918	-80.3466
2012-12-17 00:08:40	76.72	79	8.25358	-78.2059	-80.5301
2012-12-17 00:18:40	76.86	79.18	8.26052	-78.3486	-80.7136
2012-12-17 00:28:40	77.05	79.35	8.26746	-78.5423	-80.8869
2012-12-17 00:38:40	77.21	79.51	8.27441	-78.7054	-81.0499
2012-12-17 00:48:40	77.38	79.7	8.28135	-78.8787	-81.2436	2012-12-17 00:48:40
2012-12-17 00:58:40	77.54	79.85	8.2883	-79.0418	-81.3965
2012-12-17 01:08:40	77.71	80.04	8.29524	-79.2151	-81.5902
2012-12-17 01:18:40	77.89	80.21	8.30219	-79.3986	-81.7635
2012-12-17 01:28:40	78.08	80.37	8.30913	-79.5923	-81.9266
2012-12-17 01:38:40	78.24	80.56	8.31608	-79.7554	-82.1203
2012-12-17 01:48:40	78.41	80.73	8.32302	-79.9286	-82.2936	2012-12-17 01:48:40
2012-12-17 01:58:40	78.57	80.88	8.32996	-80.0917	-82.4465
2012-12-17 02:08:40	78.74	81.08	8.33691	-80.265	-82.6504
2012-12-17 02:18:40	78.91	81.23	8.34385	-80.4383	-82.8033
2012-12-17 02:28:40	79.1	81.41	8.3508	-80.632	-82.9867
2012-12-17 02:38:40	79.31	81.63	8.35774	-80.8461	-83.211
2012-12-17 02:48:40	79.48	81.8	8.36469	-81.0194	-83.3843	2012-12-17 02:48:40
2012-12-17 02:58:40	79.66	81.98	8.37163	-81.2029	-83.5678
2012-12-17 03:08:40	79.8	82.17	8.37858	-81.3456	-83.7615
2012-12-17 03:18:40	80.01	82.33	8.38552	-81.5596	-83.9246
2012-12-17 03:28:40	80.16	82.51	8.39246	-81.7125	-84.1081
2012-12-17 03:38:40	80.36	82.7	8.39941	-81.9164	-84.3017
2012-12-17 03:48:40	80.54	82.86	8.40635	-82.0999	-84.4648	2012-12-17 03:48:40
2012-12-17 03:58:40	80.73	83.05	8.4133	-82.2936	-84.6585
2012-12-17 04:08:40	80.88	83.23	8.42024	-82.4465	-84.842
2012-12-17 04:18:40	81.06	83.41	8.42719	-82.63	-85.0255
2012-12-17 04:28:40	81.27	83.59	8.43413	-82.844	-85.209
2012-12-17 04:38:40	81.44	83.75	8.44108	-83.0173	-85.3721
2012-12-17 04:48:40	81.62	83.94	8.44802	-83.2008	-85.5657	2012-12-17 04:48:40
2012-12-17 04:58:40	81.77	84.12	8.45496	-83.3537	-85.7492
2012-12-17 05:08:40	81.96	84.3	8.46191	-83.5474	-85.9327
2012-12-17 05:18:40	82.07	84.4	8.46885	-83.6595	-86.0347
2012-12-17 05:28:40	82.32	84.66	8.4758	-83.9144	-86.2997
2012-12-17 05:38:40	82.47	84.83	8.48274	-84.0673	-86.473
2012-12-17 05:48:40	82.64	84.97	8.48969	-84.2406	-86.6157	2012-12-17 05:48:40
2012-12-17 05:58:40	82.85	85.17	8.49663	-84.4546	-86.8196
2012-12-17 06:08:40	83.04	85.34	8.50358	-84.6483	-86.9929
2012-12-17 06:18:40	83.19	85.52	8.51052	-84.8012	-87.1764
2012-12-17 06:28:40	83.38	85.74	8.51746	-84.9949	-87.4006
2012-12-17 06:38:40	83.56	85.91	8.52441	-85.1784	-87.5739
2012-12-17 06:48:40	83.76	86.11	8.53135	-85.3823	-87.7778	2012-12-17 06:48:40
2012-12-17 06:58:40	83.83	86.27	8.5383	-85.4536	-87.9409
2012-12-17 07:08:40	84.12	86.47	8.54524	-85.7492	-88.1448
2012-12-17 07:18:40	84.31	86.64	8.55219	-85.9429	-88.318
2012-12-17 07:28:40	84.48	86.84	8.55913	-86.1162	-88.5219
2012-12-17 07:38:40	84.69	87.02	8.56608	-86.3303	-88.7054
2012-12-17 07:48:40	84.89	87.23	8.57302	-86.5341	-88.9195	2012-12-17 07:48:40
2012-12-17 07:58:40	85.08	87.42	8.57996	-86.7278	-89.1131
2012-12-17 08:08:40	85.28	87.59	8.58691	-86.9317	-89.2864
2012-12-17 08:18:40	85.49	87.81	8.59385	-87.1458	-89.5107
2012-12-17 08:28:40	85.71	88.02	8.6008	-87.37	-89.7248
2012-12-17 08:38:40	85.89	88.22	8.60774	-87.5535	-89.9286
2012-12-17 08:48:40	86.08	88.41	8.61469	-87.7472	-90.1223	2012-12-17 08:48:40
2012-12-17 08:58:40	86.23	88.6	8.62163	-87.9001	-90.316
2012-12-17 09:08:40	85.99	88.33	8.62858	-87.6555	-90.0408
2012-12-17 09:18:40	86.43	88.73	8.63552	-88.104	-90.4485
2012-12-17 09:28:40	86.64	88.94	8.64246	-88.318	-90.6626
2012-12-17 09:38:40	86.85	89.14	8.64941	-88.5321	-90.8665
2012-12-17 09:48:40	87.07	89.36	8.65635	-88.7564	-91.0907	2012-12-17 09:48:40
2012-12-17 09:58:40	87.29	89.56	8.6633	-88.9806	-91.2946
2012-12-17 10:08:40	87.46	89.74	8.67024	-89.1539	-91.4781
2012-12-17 10:18:40	87.62	89.96	8.67719	-89.317	-91.7023
2012-12-17 10:28:40	87.85	90.19	8.68413	-89.5515	-91.9368
2012-12-17 10:38:40	88.14	90.44	8.69108	-89.8471	-92.1916
2012-12-17 10:48:40	88.34	90.64	8.69802	-90.051	-92.3955	2012-12-17 10:48:40
2012-12-17 10:58:40	88.43	90.81	8.70496	-90.1427	-92.5688
2012-12-17 11:08:40	88.66	91.02	8.71191	-90.3772	-92.7829
2012-12-17 11:18:40	88.94	91.28	8.71885	-90.6626	-93.0479
2012-12-17 11:28:40	89.15	91.48	8.7258	-90.8767	-93.2518
2012-12-17 11:38:40	89.4	91.72	8.73274	-91.1315	-93.4964
2012-12-17 11:48:40	89.66	91.96	8.73969	-91.3965	-93.7411	2012-12-17 11:48:40
2012-12-17 11:58:40	89.86	92.18	8.74663	-91.6004	-93.9653
2012-12-17 12:08:40	90.14	92.44	8.75358	-91.8858	-94.2304
2012-12-17 12:18:40	90.37	92.69	8.76052	-92.1203	-94.4852
2012-12-17 12:28:40	90.6	92.9	8.76746	-92.3547	-94.6993
2012-12-17 12:38:40	90.86	93.15	8.77441	-92.6198	-94.9541
2012-12-17 12:48:40	91.13	93.43	8.78135	-92.895	-95.2396	2012-12-17 12:48:40
2012-12-17 12:58:40	91.34	93.65	8.7883	-93.1091	-95.4638
2012-12-17 13:08:40	91.61	93.85	8.79524	-93.3843	-95.6677
2012-12-17 13:18:40	91.86	94.15	8.80219	-93.6391	-95.9735
2012-12-17 13:28:40	92.09	94.36	8.80913	-93.8736	-96.1876
2012-12-17 13:38:40	92.27	94.56	8.81608	-94.0571	-96.3914
2012-12-17 13:48:40	92.53	94.82	8.82302	-94.3221	-96.6565	2012-12-17 13:48:40
2012-12-17 13:58:40	92.79	95.07	8.82996	-94.5872	-96.9113
2012-12-17 14:08:40	92.99	95.32	8.83691	-94.791	-97.1662
2012-12-17 14:18:40	93.28	95.59	8.84385	-95.0866	-97.4414
2012-12-17 14:28:40	93.53	95.84	8.8508	-95.3415	-97.6962
2012-12-17 14:38:40	93.72	96.06	8.85774	-95.5352	-97.9205
2012-12-17 14:48:40	93.98	96.26	8.86469	-95.8002	-98.1244	2012-12-17 14:48:40
2012-12-17 14:58:40	94.21	96.51	8.87163	-96.0347	-98.3792
2012-12-17 15:08:40	94.47	96.75	8.87858	-96.2997	-98.6239
2012-12-17 15:18:40	94.71	97.04	8.88552	-96.5443	-98.9195
2012-12-17 15:28:40	94.95	97.24	8.89246	-96.789	-99.1233
2012-12-17 15:38:40	95.2	97.52	8.89941	-97.0438	-99.4088
2012-12-17 15:48:40	95.45	97.74	8.90635	-97.2987	-99.633	2012-12-17 15:48:40
2012-12-17 15:58:40	95.68	97.98	8.9133	-97.5331	-99.8777
2012-12-17 16:08:40	95.89	98.23	8.92024	-97.7472	-100.133
2012-12-17 16:18:40	96.19	98.5	8.92719	-98.053	-100.408
2012-12-17 16:28:40	96.42	98.71	8.93413	-98.2875	-100.622
2012-12-17 16:38:40	96.63	98.95	8.94108	-98.5015	-100.866
2012-12-17 16:48:40	96.87	99.21	8.94802	-98.7462	-101.131	2012-12-17 16:48:40
2012-12-17 16:58:40	97.12	99.45	8.95496	-99.001	-101.376
2012-12-17 17:08:40	97.33	99.7	8.96191	-99.2151	-101.631
2012-12-17 17:18:40	97.62	99.96	8.96885	-99.5107	-101.896
2012-12-17 17:28:40	97.89	100.18	8.9758	-99.7859	-102.12
2012-12-17 17:38:40	98.1	100.44	8.98274	-100	-102.385
2012-12-17 17:48:40	98.34	100.68	8.98969	-100.245	-102.63	2012-12-17 17:48:40
2012-12-17 17:58:40	98.61	100.92	8.99663	-100.52	-102.875
2012-12-17 18:08:40	98.84	101.19	9.00358	-100.754	-103.15
2012-12-17 18:18:40	99.13	101.49	9.01052	-101.05	-103.456
2012-12-17 18:28:40	99.35	101.7	9.01746	-101.274	-103.67
2012-12-17 18:38:40	99.6	101.94	9.02441	-101.529	-103.914
2012-12-17 18:48:40	99.84	102.22	9.03135	-101.774	-104.2	2012-12-17 18:48:40
2012-12-17 18:58:40	100.13	102.47	9.0383	-102.069	-104.455
2012-12-17 19:08:40	100.37	102.73	9.04524	-102.314	-104.72
2012-12-17 19:18:40	100.68	103.03	9.05219	-102.63	-105.025
2012-12-17 19:28:40	100.94	103.3	9.05913	-102.895	-105.301
2012-12-17 19:38:40	101.23	103.59	9.06608	-103.191	-105.596
2012-12-17 19:48:40	101.49	103.86	9.07302	-103.456	-105.872	2012-12-17 19:48:40
2012-12-17 19:58:40	101.75	104.11	9.07996	-103.721	-106.126
2012-12-17 20:08:40	102.04	104.41	9.08691	-104.016	-106.432
2012-12-17 20:18:40	102.28	104.69	9.09385	-104.261	-106.718
2012-12-17 20:28:40	102.56	104.94	9.1008	-104.546	-106.972
2012-12-17 20:38:40	102.87	105.25	9.10774	-104.862	-107.288
2012-12-17 20:48:40	103.15	105.51	9.11469	-105.148	-107.554	2012-12-17 20:48:40
2012-12-17 20:58:40	103.37	105.75	9.12163	-105.372	-107.798
2012-12-17 21:08:40	103.7	106.05	9.12858	-105.708	-108.104
2012-12-17 21:18:40	103.97	106.36	9.13552	-105.984	-108.42
2012-12-17 21:28:40	104.24	106.64	9.14246	-106.259	-108.705
2012-12-17 21:38:40	104.48	106.94	9.14941	-106.504	-109.011
2012-12-17 21:48:40	104.83	107.22	9.15635	-106.86	-109.297	2012-12-17 21:48:40
2012-12-17 21:58:40	105.08	107.49	9.1633	-107.115	-109.572
2012-12-17 22:08:40	105.36	107.73	9.17024	-107.401	-109.817
2012-12-17 22:18:40	105.66	108.05	9.17719	-107.706	-110.143
2012-12-17 22:28:40	105.92	108.33	9.18413	-107.971	-110.428
2012-12-17 22:38:40	106.23	108.62	9.19108	-108.287	-110.724
2012-12-17 22:48:40	106.51	108.93	9.19802	-108.573	-111.04	2012-12-17 22:48:40
2012-12-17 22:58:40	106.75	109.17	9.20496	-108.818	-111.284
2012-12-17 23:08:40	107.03	109.46	9.21191	-109.103	-111.58
2012-12-17 23:18:40	107.38	109.79	9.21885	-109.46	-111.916
2012-12-17 23:28:40	107.67	110.06	9.2258	-109.755	-112.192
2012-12-17 23:38:40	107.94	110.36	9.23274	-110.031	-112.497
2012-12-17 23:48:40	108.21	110.64	9.23969	-110.306	-112.783	2012-12-17 23:48:40
2012-12-17 23:58:40	108.48	110.89	9.24663	-110.581	-113.038
2012-12-18 00:08:40	108.78	111.2	9.25358	-110.887	-113.354
2012-12-18 00:18:40	109.04	111.49	9.26052	-111.152	-113.649
2012-12-18 00:28:40	109.33	111.77	9.26746	-111.448	-113.935
2012-12-18 00:38:40	109.62	112.05	9.27441	-111.743	-114.22
2012-12-18 00:48:40	109.93	112.38	9.28135	-112.059	-114.557	2012-12-18 00:48:40
2012-12-18 00:58:40	110.24	112.69	9.2883	-112.375	-114.873
2012-12-18 01:08:40	110.54	113	9.29524	-112.681	-115.189
2012-12-18 01:18:40	110.83	113.31	9.30219	-112.977	-115.505
2012-12-18 01:28:40	111.13	113.61	9.30913	-113.282	-115.81
2012-12-18 01:38:40	111.44	113.91	9.31608	-113.598	-116.116
2012-12-18 01:48:40	111.71	114.2	9.32302	-113.874	-116.412	2012-12-18 01:48:40
2012-12-18 01:58:40	112.02	114.47	9.32996	-114.19	-116.687
2012-12-18 02:08:40	112.29	114.79	9.33691	-114.465	-117.013
2012-12-18 02:18:40	112.63	115.1	9.34385	-114.811	-117.329
2012-12-18 02:28:40	112.91	115.4	9.3508	-115.097	-117.635
2012-12-18 02:38:40	113.22	115.73	9.35774	-115.413	-117.971
2012-12-18 02:48:40	113.55	116.07	9.36469	-115.749	-118.318	2012-12-18 02:48:40
2012-12-18 02:58:40	113.82	116.33	9.37163	-116.024	-118.583
2012-12-18 03:08:40	114.13	116.64	9.37858	-116.34	-118.899
2012-12-18 03:18:40	114.45	116.96	9.38552	-116.667	-119.225
2012-12-18 03:28:40	114.71	117.2	9.39246	-116.932	-119.47
2012-12-18 03:38:40	114.98	117.51	9.39941	-117.207	-119.786
2012-12-18 03:48:40	115.28	117.82	9.40635	-117.513	-120.102	2012-12-18 03:48:40
2012-12-18 03:58:40	115.58	118.09	9.4133	-117.819	-120.377
2012-12-18 04:08:40	115.86	118.41	9.42024	-118.104	-120.703
2012-12-18 04:18:40	116.19	118.72	9.42719	-118.44	-121.019
2012-12-18 04:28:40	116.47	118.99	9.43413	-118.726	-121.295
2012-12-18 04:38:40	116.72	119.31	9.44108	-118.981	-121.621
2012-12-18 04:48:40	117.03	119.6	9.44802	-119.297	-121.916	2012-12-18 04:48:40
2012-12-18 04:58:40	117.33	119.88	9.45496	-119.602	-122.202
2012-12-18 05:08:40	117.63	120.2	9.46191	-119.908	-122.528
2012-12-18 05:18:40	117.92	120.5	9.46885	-120.204	-122.834
2012-12-18 05:28:40	118.19	120.77	9.4758	-120.479	-123.109
2012-12-18 05:38:40	118.52	121.1	9.48274	-120.815	-123.445
2012-12-18 05:48:40	118.84	121.41	9.48969	-121.142	-123.761	2012-12-18 05:48:40
2012-12-18 05:58:40	119.1	121.65	9.49663	-121.407	-124.006
2012-12-18 06:08:40	119.41	121.97	9.50358	-121.723	-124.332
2012-12-18 06:18:40	119.7	122.26	9.51052	-122.018	-124.628
2012-12-18 06:28:40	119.96	122.53	9.51746	-122.283	-124.903
2012-12-18 06:38:40	120.26	122.88	9.52441	-122.589	-125.26
2012-12-18 06:48:40	120.51	123.17	9.53135	-122.844	-125.556	2012-12-18 06:48:40
2012-12-18 06:58:40	120.82	123.42	9.5383	-123.16	-125.81
2012-12-18 07:08:40	121.11	123.68	9.54524	-123.456	-126.075
2012-12-18 07:18:40	121.39	123.99	9.55219	-123.741	-126.391
2012-12-18 07:28:40	121.64	124.21	9.55913	-123.996	-126.616
2012-12-18 07:38:40	121.87	124.5	9.56608	-124.23	-126.911
2012-12-18 07:48:40	122.19	124.8	9.57302	-124.557	-127.217	2012-12-18 07:48:40
2012-12-18 07:58:40	122.42	125.02	9.57996	-124.791	-127.441
2012-12-18 08:08:40	122.68	125.27	9.58691	-125.056	-127.696
2012-12-18 08:18:40	122.95	125.6	9.59385	-125.331	-128.033
2012-12-18 08:28:40	123.21	125.9	9.6008	-125.596	-128.338
2012-12-18 08:38:40	123.23	125.85	9.60774	-125.617	-128.287
2012-12-18 08:48:40	123.52	126.12	9.61469	-125.912	-128.563	2012-12-18 08:48:40
2012-12-18 08:58:40	123.78	126.37	9.62163	-126.177	-128.818
2012-12-18 09:08:40	124.04	126.62	9.62858	-126.442	-129.072
2012-12-18 09:18:40	124.29	126.88	9.63552	-126.697	-129.337
2012-12-18 09:28:40	124.55	127.14	9.64246	-126.962	-129.602
2012-12-18 09:38:40	124.78	127.41	9.64941	-127.197	-129.878
2012-12-18 09:48:40	125.01	127.64	9.65635	-127.431	-130.112	2012-12-18 09:48:40
2012-12-18 09:58:40	125.26	127.87	9.6633	-127.686	-130.347
2012-12-18 10:08:40	125.51	128.14	9.67024	-127.941	-130.622
2012-12-18 10:18:40	125.77	128.38	9.67719	-128.206	-130.866
2012-12-18 10:28:40	126.01	128.63	9.68413	-128.451	-131.121
2012-12-18 10:38:40	126.27	128.91	9.69108	-128.716	-131.407
2012-12-18 10:48:40	126.51	129.15	9.69802	-128.96	-131.651	2012-12-18 10:48:40
2012-12-18 10:58:40	126.76	129.4	9.70496	-129.215	-131.906
2012-12-18 11:08:40	127.02	129.66	9.71191	-129.48	-132.171
2012-12-18 11:18:40	127.27	129.93	9.71885	-129.735	-132.446
2012-12-18 11:28:40	127.53	130.17	9.7258	-130	-132.691
2012-12-18 11:38:40	127.77	130.45	9.73274	-130.245	-132.977
2012-12-18 11:48:40	128.06	130.73	9.73969	-130.54	-133.262	2012-12-18 11:48:40
2012-12-18 11:58:40	128.31	131	9.74663	-130.795	-133.537
2012-12-18 12:08:40	128.6	131.27	9.75358	-131.091	-133.812
2012-12-18 12:18:40	128.86	131.55	9.76052	-131.356	-134.098
2012-12-18 12:28:40	129.09	131.8	9.76746	-131.59	-134.353
2012-12-18 12:38:40	129.36	132.04	9.77441	-131.865	-134.597
2012-12-18 12:48:40	129.63	132.28	9.78135	-132.141	-134.842	2012-12-18 12:48:40
2012-12-18 12:58:40	129.98	132.68	9.7883	-132.497	-135.25
2012-12-18 13:08:40	130.21	132.95	9.79524	-132.732	-135.525
2012-12-18 13:18:40	130.49	133.21	9.80219	-133.017	-135.79
2012-12-18 13:28:40	130.72	133.43	9.80913	-133.252	-136.014
2012-12-18 13:38:40	130.93	133.7	9.81608	-133.466	-136.29
2012-12-18 13:48:40	131.2	133.93	9.82302	-133.741	-136.524	2012-12-18 13:48:40
2012-12-18 13:58:40	131.42	134.17	9.82996	-133.965	-136.769
2012-12-18 14:08:40	131.71	134.46	9.83691	-134.261	-137.064
2012-12-18 14:18:40	131.92	134.66	9.84385	-134.475	-137.268
2012-12-18 14:28:40	132.14	134.93	9.8508	-134.699	-137.543
2012-12-18 14:38:40	132.46	135.23	9.85774	-135.025	-137.849
2012-12-18 14:48:40	132.7	135.47	9.86469	-135.27	-138.094	2012-12-18 14:48:40
2012-12-18 14:58:40	132.92	135.69	9.87163	-135.494	-138.318
2012-12-18 15:08:40	133.19	135.96	9.87858	-135.77	-138.593
2012-12-18 15:18:40	133.47	136.23	9.88552	-136.055	-138.869
2012-12-18 15:28:40	133.7	136.49	9.89246	-136.29	-139.134
2012-12-18 15:38:40	133.96	136.71	9.89941	-136.555	-139.358
2012-12-18 15:48:40	134.19	136.99	9.90635	-136.789	-139.643	2012-12-18 15:48:40
2012-12-18 15:58:40	134.41	137.23	9.9133	-137.013	-139.888
2012-12-18 16:08:40	134.68	137.47	9.92024	-137.288	-140.133
2012-12-18 16:18:40	134.92	137.72	9.92719	-137.533	-140.387
2012-12-18 16:28:40	135.06	137.91	9.93413	-137.676	-140.581
2012-12-18 16:38:40	135.25	138.1	9.94108	-137.87	-140.775
2012-12-18 16:48:40	135.45	138.31	9.94802	-138.073	-140.989	2012-12-18 16:48:40
2012-12-18 16:58:40	135.69	138.52	9.95496	-138.318	-141.203
2012-12-18 17:08:40	135.91	138.76	9.96191	-138.542	-141.448
2012-12-18 17:18:40	136.13	139	9.96885	-138.767	-141.692
2012-12-18 17:28:40	136.39	139.22	9.9758	-139.032	-141.916
2012-12-18 17:38:40	136.52	139.43	9.98274	-139.164	-142.13
2012-12-18 17:48:40	136.8	139.66	9.98969	-139.45	-142.365	2012-12-18 17:48:40
2012-12-18 17:58:40	137.02	139.89	9.99663	-139.674	-142.599
2012-12-18 18:08:40	137.23	140.11	10.0036	-139.888	-142.824
2012-12-18 18:18:40	137.48	140.37	10.0105	-140.143	-143.089
2012-12-18 18:28:40	137.7	140.58	10.0175	-140.367	-143.303
2012-12-18 18:38:40	137.91	140.81	10.0244	-140.581	-143.537
2012-12-18 18:48:40	138.13	141.07	10.0314	-140.805	-143.802	2012-12-18 18:48:40
2012-12-18 18:58:40	138.35	141.25	10.0383	-141.03	-143.986
2012-12-18 19:08:40	138.57	141.5	10.0452	-141.254	-144.241
2012-12-18 19:18:40	138.8	141.71	10.0522	-141.488	-144.455
2012-12-18 19:28:40	139.05	141.99	10.0591	-141.743	-144.74
2012-12-18 19:38:40	139.27	142.19	10.0661	-141.967	-144.944
2012-12-18 19:48:40	139.52	142.43	10.073	-142.222	-145.189	2012-12-18 19:48:40
2012-12-18 19:58:40	139.74	142.66	10.08	-142.446	-145.423
2012-12-18 20:08:40	139.96	142.91	10.0869	-142.671	-145.678
2012-12-18 20:18:40	140.19	143.16	10.0939	-142.905	-145.933
2012-12-18 20:28:40	140.44	143.37	10.1008	-143.16	-146.147
2012-12-18 20:38:40	140.77	143.74	10.1077	-143.496	-146.524
2012-12-18 20:48:40	140.98	143.98	10.1147	-143.71	-146.769	2012-12-18 20:48:40
2012-12-18 20:58:40	141.24	144.24	10.1216	-143.976	-147.034
2012-12-18 21:08:40	141.46	144.43	10.1286	-144.2	-147.227
2012-12-18 21:18:40	141.56	144.66	10.1355	-144.302	-147.462
2012-12-18 21:28:40	141.89	144.84	10.1425	-144.638	-147.645
2012-12-18 21:38:40	142.06	145.05	10.1494	-144.811	-147.859
2012-12-18 21:48:40	142.28	145.27	10.1564	-145.036	-148.084	2012-12-18 21:48:40
2012-12-18 21:58:40	142.5	145.46	10.1633	-145.26	-148.277
2012-12-18 22:08:40	142.65	145.71	10.1702	-145.413	-148.532
2012-12-18 22:18:40	142.91	145.97	10.1772	-145.678	-148.797
2012-12-18 22:28:40	143.07	146.15	10.1841	-145.841	-148.981
2012-12-18 22:38:40	143.31	146.35	10.1911	-146.086	-149.185
2012-12-18 22:48:40	143.5	146.55	10.198	-146.279	-149.388	2012-12-18 22:48:40
2012-12-18 22:58:40	143.71	146.76	10.205	-146.493	-149.602
2012-12-18 23:08:40	143.91	146.99	10.2119	-146.697	-149.837
2012-12-18 23:18:40	144.12	147.21	10.2189	-146.911	-150.061
2012-12-18 23:28:40	144.31	147.37	10.2258	-147.105	-150.224
2012-12-18 23:38:40	144.5	147.62	10.2327	-147.299	-150.479
2012-12-18 23:48:40	144.72	147.8	10.2397	-147.523	-150.663	2012-12-18 23:48:40
2012-12-18 23:58:40	144.9	148.03	10.2466	-147.706	-150.897
2012-12-19 00:08:40	145.11	148.25	10.2536	-147.92	-151.121
2012-12-19 00:18:40	145.32	148.43	10.2605	-148.135	-151.305
2012-12-19 00:28:40	145.48	148.62	10.2675	-148.298	-151.498
2012-12-19 00:38:40	145.71	148.84	10.2744	-148.532	-151.723
2012-12-19 00:48:40	145.93	149.01	10.2814	-148.756	-151.896	2012-12-19 00:48:40
2012-12-19 00:58:40	146.13	149.23	10.2883	-148.96	-152.12
2012-12-19 01:08:40	146.32	149.46	10.2952	-149.154	-152.355
2012-12-19 01:18:40	146.52	149.67	10.3022	-149.358	-152.569
2012-12-19 01:28:40	146.7	149.85	10.3091	-149.541	-152.752
2012-12-19 01:38:40	146.87	150.06	10.3161	-149.715	-152.966
2012-12-19 01:48:40	147.08	150.25	10.323	-149.929	-153.16	2012-12-19 01:48:40
2012-12-19 01:58:40	147.24	150.48	10.33	-150.092	-153.394
2012-12-19 02:08:40	147.47	150.69	10.3369	-150.326	-153.609
2012-12-19 02:18:40	147.68	150.91	10.3439	-150.54	-153.833
2012-12-19 02:28:40	147.88	151.14	10.3508	-150.744	-154.067
2012-12-19 02:38:40	148.07	151.31	10.3577	-150.938	-154.241
2012-12-19 02:48:40	148.27	151.5	10.3647	-151.142	-154.434	2012-12-19 02:48:40
2012-12-19 02:58:40	148.47	151.74	10.3716	-151.346	-154.679
2012-12-19 03:08:40	148.66	151.92	10.3786	-151.539	-154.862
2012-12-19 03:18:40	148.87	152.12	10.3855	-151.753	-155.066
2012-12-19 03:28:40	149.06	152.38	10.3925	-151.947	-155.331
2012-12-19 03:38:40	149.25	152.56	10.3994	-152.141	-155.515
2012-12-19 03:48:40	149.45	152.76	10.4064	-152.345	-155.719	2012-12-19 03:48:40
2012-12-19 03:58:40	149.65	152.94	10.4133	-152.548	-155.902
2012-12-19 04:08:40	149.82	153.15	10.4202	-152.722	-156.116
2012-12-19 04:18:40	150.01	153.36	10.4272	-152.915	-156.33
2012-12-19 04:28:40	150.13	153.53	10.4341	-153.038	-156.504
2012-12-19 04:38:40	150.34	153.74	10.4411	-153.252	-156.718
2012-12-19 04:48:40	150.57	153.96	10.448	-153.486	-156.942	2012-12-19 04:48:40
2012-12-19 04:58:40	150.75	154.15	10.455	-153.67	-157.136
2012-12-19 05:08:40	150.96	154.38	10.4619	-153.884	-157.37
2012-12-19 05:18:40	151.15	154.58	10.4689	-154.077	-157.574
2012-12-19 05:28:40	151.34	154.75	10.4758	-154.271	-157.747
2012-12-19 05:38:40	151.51	154.97	10.4827	-154.444	-157.971
2012-12-19 05:48:40	151.71	155.14	10.4897	-154.648	-158.145	2012-12-19 05:48:40
2012-12-19 05:58:40	151.88	155.35	10.4966	-154.822	-158.359
2012-12-19 06:08:40	152.08	155.41	10.5036	-155.025	-158.42
2012-12-19 06:18:40	152.27	155.73	10.5105	-155.219	-158.746
2012-12-19 06:28:40	152.43	155.93	10.5175	-155.382	-158.95
2012-12-19 06:38:40	152.6	156.13	10.5244	-155.556	-159.154
2012-12-19 06:48:40	152.77	156.31	10.5314	-155.729	-159.337	2012-12-19 06:48:40
2012-12-19 06:58:40	152.97	156.53	10.5383	-155.933	-159.562
2012-12-19 07:08:40	153.14	156.7	10.5452	-156.106	-159.735
2012-12-19 07:18:40	153.33	156.92	10.5522	-156.3	-159.959
2012-12-19 07:28:40	153.52	157.11	10.5591	-156.493	-160.153
2012-12-19 07:38:40	153.69	157.32	10.5661	-156.667	-160.367
2012-12-19 07:48:40	153.88	157.53	10.573	-156.86	-160.581	2012-12-19 07:48:40
2012-12-19 07:58:40	154.06	157.75	10.58	-157.044	-160.805
2012-12-19 08:08:40	154.22	157.99	10.5869	-157.207	-161.05
2012-12-19 08:18:40	154.11	158.04	10.5939	-157.095	-161.101
2012-12-19 08:28:40	154.41	158.23	10.6008	-157.401	-161.295
2012-12-19 08:38:40	154.62	158.49	10.6077	-157.615	-161.56
2012-12-19 08:48:40	154.84	158.72	10.6147	-157.839	-161.794	2012-12-19 08:48:40
2012-12-19 08:58:40	155.06	158.94	10.6216	-158.063	-162.018
2012-12-19 09:08:40	155.27	159.16	10.6286	-158.277	-162.243
2012-12-19 09:18:40	155.47	159.37	10.6355	-158.481	-162.457
2012-12-19 09:28:40	155.67	159.59	10.6425	-158.685	-162.681
2012-12-19 09:38:40	155.89	159.82	10.6494	-158.909	-162.915
2012-12-19 09:48:40	156.09	160.04	10.6564	-159.113	-163.14	2012-12-19 09:48:40
2012-12-19 09:58:40	156.3	160.24	10.6633	-159.327	-163.344
2012-12-19 10:08:40	156.49	160.47	10.6702	-159.521	-163.578
2012-12-19 10:18:40	156.67	160.68	10.6772	-159.704	-163.792
2012-12-19 10:28:40	156.85	160.89	10.6841	-159.888	-164.006
2012-12-19 10:38:40	157.04	161.03	10.6911	-160.082	-164.149
2012-12-19 10:48:40	157.25	161.28	10.698	-160.296	-164.404	2012-12-19 10:48:40
2012-12-19 10:58:40	157.45	161.47	10.705	-160.499	-164.597
2012-12-19 11:08:40	157.6	161.7	10.7119	-160.652	-164.832
2012-12-19 11:18:40	157.82	161.88	10.7189	-160.877	-165.015
2012-12-19 11:28:40	157.97	162.07	10.7258	-161.03	-165.209
2012-12-19 11:38:40	158.18	162.31	10.7327	-161.244	-165.454
2012-12-19 11:48:40	158.36	162.51	10.7397	-161.427	-165.657	2012-12-19 11:48:40
2012-12-19 11:58:40	158.55	162.72	10.7466	-161.621	-165.872
2012-12-19 12:08:40	158.74	162.87	10.7536	-161.814	-166.024
2012-12-19 12:18:40	158.91	163.08	10.7605	-161.988	-166.239
2012-12-19 12:28:40	159.06	163.24	10.7675	-162.141	-166.402
2012-12-19 12:38:40	159.15	163.43	10.7744	-162.232	-166.595
2012-12-19 12:48:40	159.42	163.63	10.7814	-162.508	-166.799	2012-12-19 12:48:40
2012-12-19 12:58:40	159.71	163.92	10.7883	-162.803	-167.095
2012-12-19 13:08:40	159.88	164.15	10.7952	-162.977	-167.329
2012-12-19 13:18:40	160.05	164.31	10.8022	-163.15	-167.492
2012-12-19 13:28:40	160.22	164.52	10.8091	-163.323	-167.706
2012-12-19 13:38:40	160.37	164.73	10.8161	-163.476	-167.92
2012-12-19 13:48:40	160.52	164.9	10.823	-163.629	-168.094	2012-12-19 13:48:40
2012-12-19 13:58:40	160.72	165.11	10.83	-163.833	-168.308
2012-12-19 14:08:40	160.9	165.33	10.8369	-164.016	-168.532
2012-12-19 14:18:40	161.08	165.53	10.8439	-164.2	-168.736
2012-12-19 14:28:40	161.26	165.72	10.8508	-164.383	-168.93
2012-12-19 14:38:40	161.42	165.87	10.8577	-164.546	-169.083
2012-12-19 14:48:40	161.57	166.07	10.8647	-164.699	-169.286	2012-12-19 14:48:40
2012-12-19 14:58:40	161.75	166.3	10.8716	-164.883	-169.521
2012-12-19 15:08:40	161.9	166.49	10.8786	-165.036	-169.715
2012-12-19 15:18:40	162.07	166.69	10.8855	-165.209	-169.918
2012-12-19 15:28:40	162.25	166.86	10.8925	-165.392	-170.092
2012-12-19 15:38:40	162.39	167.05	10.8994	-165.535	-170.285
2012-12-19 15:48:40	162.56	167.27	10.9064	-165.708	-170.51	2012-12-19 15:48:40
2012-12-19 15:58:40	161.93	167.42	10.9133	-165.066	-170.663
2012-12-19 16:08:40	162.9	167.62	10.9202	-166.055	-170.866
2012-12-19 16:18:40	163.05	167.82	10.9272	-166.208	-171.07
2012-12-19 16:28:40	163.2	168.01	10.9341	-166.361	-171.264
2012-12-19 16:38:40	163.4	168.23	10.9411	-166.565	-171.488
2012-12-19 16:48:40	163.36	168.3	10.948	-166.524	-171.56	2012-12-19 16:48:40
2012-12-19 16:58:40	163.62	168.54	10.955	-166.789	-171.804
2012-12-19 17:08:40	163.77	168.74	10.9619	-166.942	-172.008
2012-12-19 17:18:40	163.99	168.95	10.9689	-167.166	-172.222
2012-12-19 17:28:40	164.16	169.16	10.9758	-167.339	-172.436
2012-12-19 17:38:40	164.33	169.38	10.9827	-167.513	-172.661
2012-12-19 17:48:40	164.49	169.57	10.9897	-167.676	-172.854	2012-12-19 17:48:40
2012-12-19 17:58:40	164.68	169.78	10.9966	-167.87	-173.068
2012-12-19 18:08:40	164.82	169.98	11.0036	-168.012	-173.272
2012-12-19 18:18:40	165	170.22	11.0105	-168.196	-173.517
2012-12-19 18:28:40	165.15	170.41	11.0175	-168.349	-173.71
2012-12-19 18:38:40	165.33	170.63	11.0244	-168.532	-173.935
2012-12-19 18:48:40	165.49	170.82	11.0314	-168.695	-174.128	2012-12-19 18:48:40
2012-12-19 18:58:40	165.64	171.04	11.0383	-168.848	-174.353
2012-12-19 19:08:40	165.83	171.27	11.0452	-169.042	-174.587
2012-12-19 19:18:40	165.98	171.48	11.0522	-169.195	-174.801
2012-12-19 19:28:40	166.16	171.7	11.0591	-169.378	-175.025
2012-12-19 19:38:40	166.35	171.93	11.0661	-169.572	-175.26
2012-12-19 19:48:40	166.52	172.13	11.073	-169.745	-175.464	2012-12-19 19:48:40
2012-12-19 19:58:40	166.7	172.3	11.08	-169.929	-175.637
2012-12-19 20:08:40	166.87	172.57	11.0869	-170.102	-175.912
2012-12-19 20:18:40	167.03	172.8	11.0939	-170.265	-176.147
2012-12-19 20:28:40	167.21	172.99	11.1008	-170.449	-176.34
2012-12-19 20:38:40	167.38	173.19	11.1077	-170.622	-176.544
2012-12-19 20:48:40	167.54	173.43	11.1147	-170.785	-176.789	2012-12-19 20:48:40
2012-12-19 20:58:40	167.68	173.62	11.1216	-170.928	-176.983
2012-12-19 21:08:40	167.85	173.87	11.1286	-171.101	-177.238
2012-12-19 21:18:40	168.02	174.07	11.1355	-171.274	-177.441
2012-12-19 21:28:40	168.2	174.27	11.1425	-171.458	-177.645
2012-12-19 21:38:40	168.36	174.46	11.1494	-171.621	-177.839
2012-12-19 21:48:40	168.54	174.7	11.1564	-171.804	-178.084	2012-12-19 21:48:40
2012-12-19 21:58:40	168.71	174.91	11.1633	-171.978	-178.298
2012-12-19 22:08:40	168.89	175.1	11.1702	-172.161	-178.491
2012-12-19 22:18:40	169.05	175.31	11.1772	-172.324	-178.705
2012-12-19 22:28:40	169.2	175.54	11.1841	-172.477	-178.94
2012-12-19 22:38:40	169.35	175.75	11.1911	-172.63	-179.154
2012-12-19 22:48:40	169.52	175.96	11.198	-172.803	-179.368	2012-12-19 22:48:40
2012-12-19 22:58:40	169.69	176.17	11.205	-172.977	-179.582
2012-12-19 23:08:40	169.86	176.32	11.2119	-173.15	-179.735
2012-12-19 23:18:40	169.98	176.52	11.2189	-173.272	-179.939
2012-12-19 23:28:40	170.15	176.72	11.2258	-173.445	-180.143
2012-12-19 23:38:40	170.29	176.92	11.2327	-173.588	-180.347
2012-12-19 23:48:40	170.45	177.13	11.2397	-173.751	-180.561	2012-12-19 23:48:40
2012-12-19 23:58:40	170.6	177.31	11.2466	-173.904	-180.744
2012-12-20 00:08:40	170.73	177.53	11.2536	-174.037	-180.968
2012-12-20 00:18:40	170.9	177.67	11.2605	-174.21	-181.111
2012-12-20 00:28:40	170.97	177.98	11.2675	-174.281	-181.427
2012-12-20 00:38:40	171.2	178.2	11.2744	-174.516	-181.651
2012-12-20 00:48:40	171.37	178.4	11.2814	-174.689	-181.855	2012-12-20 00:48:40
2012-12-20 00:58:40	171.54	178.62	11.2883	-174.862	-182.08
2012-12-20 01:08:40	171.69	178.82	11.2952	-175.015	-182.283
2012-12-20 01:18:40	171.84	179.03	11.3022	-175.168	-182.497
2012-12-20 01:28:40	172	179.24	11.3091	-175.331	-182.712
2012-12-20 01:38:40	172.18	179.46	11.3161	-175.515	-182.936
2012-12-20 01:48:40	172.17	179.65	11.323	-175.505	-183.129	2012-12-20 01:48:40
2012-12-20 01:58:40	172.48	179.92	11.33	-175.821	-183.405
2012-12-20 02:08:40	172.62	180.11	11.3369	-175.963	-183.598
2012-12-20 02:18:40	172.78	180.31	11.3439	-176.126	-183.802
2012-12-20 02:28:40	172.95	180.51	11.3508	-176.3	-184.006
2012-12-20 02:38:40	172.99	180.73	11.3577	-176.34	-184.23
2012-12-20 02:48:40	173.25	180.91	11.3647	-176.606	-184.414	2012-12-20 02:48:40
2012-12-20 02:58:40	173.4	181.09	11.3716	-176.758	-184.597
2012-12-20 03:08:40	173.56	181.37	11.3786	-176.922	-184.883
2012-12-20 03:18:40	173.71	181.58	11.3855	-177.074	-185.097
2012-12-20 03:28:40	173.85	181.79	11.3925	-177.217	-185.311
2012-12-20 03:38:40	174.03	182.02	11.3994	-177.401	-185.545
2012-12-20 03:48:40	174.15	182.2	11.4064	-177.523	-185.729	2012-12-20 03:48:40
2012-12-20 03:58:40	174.32	182.41	11.4133	-177.696	-185.943
2012-12-20 04:08:40	174.44	182.63	11.4202	-177.819	-186.167
2012-12-20 04:18:40	174.61	182.87	11.4272	-177.992	-186.412
2012-12-20 04:28:40	174.77	183.09	11.4341	-178.155	-186.636
2012-12-20 04:38:40	174.93	183.3	11.4411	-178.318	-186.85
2012-12-20 04:48:40	175.07	183.49	11.448	-178.461	-187.044	2012-12-20 04:48:40
2012-12-20 04:58:40	175.19	183.69	11.455	-178.583	-187.248
2012-12-20 05:08:40	175.37	183.9	11.4619	-178.767	-187.462
2012-12-20 05:18:40	175.51	184.13	11.4689	-178.909	-187.696
2012-12-20 05:28:40	175.69	184.35	11.4758	-179.093	-187.92
2012-12-20 05:38:40	175.82	184.57	11.4827	-179.225	-188.145
2012-12-20 05:48:40	175.95	184.75	11.4897	-179.358	-188.328	2012-12-20 05:48:40
2012-12-20 05:58:40	176.14	185	11.4966	-179.551	-188.583
2012-12-20 06:08:40	176.26	185.19	11.5036	-179.674	-188.777
2012-12-20 06:18:40	176.39	185.45	11.5105	-179.806	-189.042
2012-12-20 06:28:40	176.56	185.65	11.5175	-179.98	-189.246
2012-12-20 06:38:40	176.69	185.87	11.5244	-180.112	-189.47
2012-12-20 06:48:40	176.84	186.08	11.5314	-180.265	-189.684	2012-12-20 06:48:40
2012-12-20 06:58:40	177.03	186.27	11.5383	-180.459	-189.878
2012-12-20 07:08:40	177.18	186.46	11.5452	-180.612	-190.071
2012-12-20 07:18:40	177.27	186.68	11.5522	-180.703	-190.296
2012-12-20 07:28:40	177.46	186.86	11.5591	-180.897	-190.479
2012-12-20 07:38:40	177.58	187	11.5661	-181.019	-190.622
2012-12-20 07:48:40	177.71	187.15	11.573	-181.152	-190.775	2012-12-20 07:48:40
2012-12-20 07:58:40	177.81	187.37	11.58	-181.254	-190.999
2012-12-20 08:08:40	177.97	187.53	11.5869	-181.417	-191.162
2012-12-20 08:18:40	178.08	187.69	11.5939	-181.529	-191.325
2012-12-20 08:28:40	175.57	187.3	11.6008	-178.97	-190.928
2012-12-20 08:38:40	178.22	188.04	11.6077	-181.672	-191.682
2012-12-20 08:48:40	178.48	188.27	11.6147	-181.937	-191.916	2012-12-20 08:48:40
2012-12-20 08:58:40	178.67	188.49	11.6216	-182.13	-192.141
2012-12-20 09:08:40	178.8	188.7	11.6286	-182.263	-192.355
2012-12-20 09:18:40	178.98	188.91	11.6355	-182.446	-192.569
2012-12-20 09:28:40	178.86	189.14	11.6425	-182.324	-192.803
2012-12-20 09:38:40	179.35	189.36	11.6494	-182.824	-193.028
2012-12-20 09:48:40	179.51	189.61	11.6564	-182.987	-193.282	2012-12-20 09:48:40
2012-12-20 09:58:40	179.66	189.81	11.6633	-183.14	-193.486
2012-12-20 10:08:40	179.84	190.06	11.6702	-183.323	-193.741
2012-12-20 10:18:40	180.01	190.24	11.6772	-183.496	-193.925
2012-12-20 10:28:40	180.14	190.49	11.6841	-183.629	-194.179
2012-12-20 10:38:40	180.44	190.87	11.6911	-183.935	-194.567
2012-12-20 10:48:40	180.42	191.1	11.698	-183.914	-194.801	2012-12-20 10:48:40
2012-12-20 10:58:40	180.73	191.29	11.705	-184.23	-194.995
2012-12-20 11:08:40	180.89	191.49	11.7119	-184.393	-195.199
2012-12-20 11:18:40	180.95	191.68	11.7189	-184.455	-195.392
2012-12-20 11:28:40	181.08	191.88	11.7258	-184.587	-195.596
2012-12-20 11:38:40	180.68	192.04	11.7327	-184.179	-195.759
2012-12-20 11:48:40	181.38	192.31	11.7397	-184.893	-196.035	2012-12-20 11:48:40
2012-12-20 11:58:40	181.56	192.56	11.7466	-185.076	-196.29
2012-12-20 12:08:40	180.14	192.63	11.7536	-183.629	-196.361
2012-12-20 12:18:40	181.47	192.69	11.7605	-184.985	-196.422
2012-12-20 12:28:40	181.53	193.03	11.7675	-185.046	-196.769
2012-12-20 12:38:40	181.94	193.29	11.7744	-185.464	-197.034
2012-12-20 12:48:40	182.07	193.55	11.7814	-185.596	-197.299	2012-12-20 12:48:40
2012-12-20 12:58:40	182.38	193.8	11.7883	-185.912	-197.554
2012-12-20 13:08:40	182.59	194.11	11.7952	-186.126	-197.87
2012-12-20 13:18:40	182.77	194.33	11.8022	-186.31	-198.094
2012-12-20 13:28:40	182.82	194.57	11.8091	-186.361	-198.338
2012-12-20 13:38:40	183.29	195.06	11.8161	-186.84	-198.838
2012-12-20 13:48:40	183.51	195.34	11.823	-187.064	-199.123	2012-12-20 13:48:40
2012-12-20 13:58:40	183.56	195.54	11.83	-187.115	-199.327
2012-12-20 14:08:40	183.81	195.8	11.8369	-187.37	-199.592
2012-12-20 14:18:40	184.03	196.1	11.8439	-187.594	-199.898
2012-12-20 14:28:40	184.19	196.34	11.8508	-187.757	-200.143
2012-12-20 14:38:40	184.37	196.56	11.8577	-187.941	-200.367
2012-12-20 14:48:40	184.57	196.85	11.8647	-188.145	-200.663	2012-12-20 14:48:40
2012-12-20 14:58:40	184.77	197.05	11.8716	-188.349	-200.866
2012-12-20 15:08:40	184.91	197.32	11.8786	-188.491	-201.142
2012-12-20 15:18:40	185.09	197.58	11.8855	-188.675	-201.407
2012-12-20 15:28:40	185.27	197.82	11.8925	-188.858	-201.651
2012-12-20 15:38:40	185.46	198.03	11.8994	-189.052	-201.865
2012-12-20 15:48:40	185.66	198.35	11.9064	-189.256	-202.192	2012-12-20 15:48:40
2012-12-20 15:58:40	185.81	198.57	11.9133	-189.409	-202.416
2012-12-20 16:08:40	185.92	198.83	11.9202	-189.521	-202.681
2012-12-20 16:18:40	186.2	198.98	11.9272	-189.806	-202.834
2012-12-20 16:28:40	186.31	199.26	11.9341	-189.918	-203.119
2012-12-20 16:38:40	186.4	199.53	11.9411	-190.01	-203.394
2012-12-20 16:48:40	186.64	199.8	11.948	-190.255	-203.67	2012-12-20 16:48:40
2012-12-20 16:58:40	186.85	200.04	11.955	-190.469	-203.914
2012-12-20 17:08:40	186.98	200.3	11.9619	-190.601	-204.179
2012-12-20 17:18:40	187.01	200.49	11.9689	-190.632	-204.373
2012-12-20 17:28:40	184.32	199.31	11.9758	-187.89	-203.17
2012-12-20 17:38:40	187.14	200.63	11.9827	-190.765	-204.516
2012-12-20 17:48:40	187.39	200.92	11.9897	-191.019	-204.811	2012-12-20 17:48:40
2012-12-20 17:58:40	187.72	201.21	11.9966	-191.356	-205.107
2012-12-20 18:08:40	187.94	201.49	12.0036	-191.58	-205.392
2012-12-20 18:18:40	188.14	201.75	12.0105	-191.784	-205.657
2012-12-20 18:28:40	187.88	202.06	12.0175	-191.519	-205.973
2012-12-20 18:38:40	188.48	202.31	12.0244	-192.13	-206.228
2012-12-20 18:48:40	188.73	202.57	12.0314	-192.385	-206.493	2012-12-20 18:48:40
2012-12-20 18:58:40	188.97	202.81	12.0383	-192.63	-206.738
2012-12-20 19:08:40	189.18	203.06	12.0452	-192.844	-206.993
2012-12-20 19:18:40	189.32	203.32	12.0522	-192.987	-207.258
2012-12-20 19:28:40	189.5	203.56	12.0591	-193.17	-207.503
2012-12-20 19:38:40	189.68	203.82	12.0661	-193.354	-207.768
2012-12-20 19:48:40	189.88	204.09	12.073	-193.558	-208.043	2012-12-20 19:48:40
2012-12-20 19:58:40	190.09	204.29	12.08	-193.772	-208.247
2012-12-20 20:08:40	190.21	204.56	12.0869	-193.894	-208.522
2012-12-20 20:18:40	190.46	204.86	12.0939	-194.149	-208.828
2012-12-20 20:28:40	190.61	205.11	12.1008	-194.302	-209.083
2012-12-20 20:38:40	190.85	205.36	12.1077	-194.546	-209.337
2012-12-20 20:48:40	191.05	205.63	12.1147	-194.75	-209.613	2012-12-20 20:48:40
2012-12-20 20:58:40	191.22	205.89	12.1216	-194.924	-209.878
2012-12-20 21:08:40	191.41	206.14	12.1286	-195.117	-210.133
2012-12-20 21:18:40	191.6	206.42	12.1355	-195.311	-210.418
2012-12-20 21:28:40	191.8	206.67	12.1425	-195.515	-210.673
2012-12-20 21:38:40	191.99	206.93	12.1494	-195.708	-210.938
2012-12-20 21:48:40	192.18	207.18	12.1564	-195.902	-211.193	2012-12-20 21:48:40
2012-12-20 21:58:40	192.39	207.46	12.1633	-196.116	-211.478
2012-12-20 22:08:40	192.55	207.71	12.1702	-196.279	-211.733
2012-12-20 22:18:40	192.72	207.96	12.1772	-196.453	-211.988
2012-12-20 22:28:40	192.94	208.23	12.1841	-196.677	-212.263
2012-12-20 22:38:40	193.13	208.5	12.1911	-196.871	-212.538
2012-12-20 22:48:40	193.33	208.74	12.198	-197.074	-212.783	2012-12-20 22:48:40
2012-12-20 22:58:40	193.4	209	12.205	-197.146	-213.048
2012-12-20 23:08:40	193.7	209.25	12.2119	-197.452	-213.303
2012-12-20 23:18:40	193.97	209.53	12.2189	-197.727	-213.588
2012-12-20 23:28:40	194.19	209.81	12.2258	-197.951	-213.874
2012-12-20 23:38:40	194.39	210.08	12.2327	-198.155	-214.149
2012-12-20 23:48:40	194.54	210.34	12.2397	-198.308	-214.414	2012-12-20 23:48:40
2012-12-20 23:58:40	194.82	210.61	12.2466	-198.593	-214.689
2012-12-21 00:08:40	195	210.89	12.2536	-198.777	-214.975
2012-12-21 00:18:40	195.2	211.15	12.2605	-198.981	-215.24
2012-12-21 00:28:40	195.36	211.43	12.2675	-199.144	-215.525
2012-12-21 00:38:40	195.52	211.7	12.2744	-199.307	-215.8
2012-12-21 00:48:40	195.71	211.97	12.2814	-199.501	-216.075	2012-12-21 00:48:40
2012-12-21 00:58:40	195.96	212.24	12.2883	-199.755	-216.351
2012-12-21 01:08:40	196.17	212.5	12.2952	-199.969	-216.616
2012-12-21 01:18:40	196.41	212.75	12.3022	-200.214	-216.871
2012-12-21 01:28:40	196.61	213.11	12.3091	-200.418	-217.238
2012-12-21 01:38:40	196.6	213.4	12.3161	-200.408	-217.533
2012-12-21 01:48:40	196.97	213.5	12.323	-200.785	-217.635	2012-12-21 01:48:40
2012-12-21 01:58:40	197.12	213.81	12.33	-200.938	-217.951
2012-12-21 02:08:40	197.32	214.14	12.3369	-201.142	-218.287
2012-12-21 02:18:40	197.55	214.43	12.3439	-201.376	-218.583
2012-12-21 02:28:40	197.81	214.85	12.3508	-201.641	-219.011
2012-12-21 02:38:40	198.2	215.18	12.3577	-202.039	-219.348
2012-12-21 02:48:40	198.4	215.46	12.3647	-202.243	-219.633	2012-12-21 02:48:40
2012-12-21 02:58:40	198.59	215.71	12.3716	-202.436	-219.888
2012-12-21 03:08:40	198.7	216.09	12.3786	-202.548	-220.275
2012-12-21 03:18:40	199.01	216.37	12.3855	-202.864	-220.561
2012-12-21 03:28:40	198.91	216.68	12.3925	-202.762	-220.877
2012-12-21 03:38:40	199.32	216.88	12.3994	-203.18	-221.081
2012-12-21 03:48:40	199.54	217.33	12.4064	-203.405	-221.539	2012-12-21 03:48:40
2012-12-21 03:58:40	199.78	217.62	12.4133	-203.649	-221.835
2012-12-21 04:08:40	200.05	217.9	12.4202	-203.925	-222.12
2012-12-21 04:18:40	200.32	218.26	12.4272	-204.2	-222.487
2012-12-21 04:28:40	200.45	218.48	12.4341	-204.332	-222.712
2012-12-21 04:38:40	200.75	218.91	12.4411	-204.638	-223.15
2012-12-21 04:48:40	200.99	219.25	12.448	-204.883	-223.496	2012-12-21 04:48:40
2012-12-21 04:58:40	201.18	219.57	12.455	-205.076	-223.823
2012-12-21 05:08:40	201.45	219.88	12.4619	-205.352	-224.139
2012-12-21 05:18:40	201.46	220.25	12.4689	-205.362	-224.516
2012-12-21 05:28:40	201.91	220.59	12.4758	-205.821	-224.862
2012-12-21 05:38:40	202.12	220.9	12.4827	-206.035	-225.178
2012-12-21 05:48:40	202.22	221.2	12.4897	-206.137	-225.484	2012-12-21 05:48:40
2012-12-21 05:58:40	202.44	221.43	12.4966	-206.361	-225.719
2012-12-21 06:08:40	202.81	221.89	12.5036	-206.738	-226.188
2012-12-21 06:18:40	202.74	222.09	12.5105	-206.667	-226.391
2012-12-21 06:28:40	203.02	222.57	12.5175	-206.952	-226.881
2012-12-21 06:38:40	203.3	222.94	12.5244	-207.238	-227.258
2012-12-21 06:48:40	203.48	223.27	12.5314	-207.421	-227.594	2012-12-21 06:48:40
2012-12-21 06:58:40	203.73	223.62	12.5383	-207.676	-227.951
2012-12-21 07:08:40	203.94	223.98	12.5452	-207.89	-228.318
2012-12-21 07:18:40	204.28	224.31	12.5522	-208.236	-228.654
2012-12-21 07:28:40	204.21	224.7	12.5591	-208.165	-229.052
2012-12-21 07:38:40	204.53	225.07	12.5661	-208.491	-229.429
2012-12-21 07:48:40	204.87	225.41	12.573	-208.838	-229.776	2012-12-21 07:48:40
2012-12-21 07:58:40	205.11	225.67	12.58	-209.083	-230.041
2012-12-21 08:08:40	205.33	225.88	12.5869	-209.307	-230.255
2012-12-21 08:18:40	189.06	222.01	12.5939	-192.722	-226.31
2012-12-21 08:28:40	202.91	225.67	12.6008	-206.84	-230.041
2012-12-21 08:38:40	205.38	226.55	12.6077	-209.358	-230.938
2012-12-21 08:48:40	205.86	227.03	12.6147	-209.847	-231.427	2012-12-21 08:48:40
2012-12-21 08:58:40	206.25	227.43	12.6216	-210.245	-231.835
2012-12-21 09:08:40	206.6	227.91	12.6286	-210.601	-232.324
2012-12-21 09:18:40	206.93	228.33	12.6355	-210.938	-232.752
2012-12-21 09:28:40	207.15	228.75	12.6425	-211.162	-233.18
2012-12-21 09:38:40	207.38	229.13	12.6494	-211.397	-233.568
2012-12-21 09:48:40	207.68	229.56	12.6564	-211.702	-234.006	2012-12-21 09:48:40
2012-12-21 09:58:40	207.97	229.9	12.6633	-211.998	-234.353
2012-12-21 10:08:40	208.19	230.3	12.6702	-212.222	-234.76
2012-12-21 10:18:40	208.47	230.68	12.6772	-212.508	-235.148
2012-12-21 10:28:40	208.81	231.12	12.6841	-212.854	-235.596
2012-12-21 10:38:40	209.07	231.55	12.6911	-213.119	-236.035
2012-12-21 10:48:40	209.42	231.94	12.698	-213.476	-236.432	2012-12-21 10:48:40
2012-12-21 10:58:40	209.63	232.33	12.705	-213.69	-236.83
2012-12-21 11:08:40	210.14	232.73	12.7119	-214.21	-237.238
2012-12-21 11:18:40	210.21	233.09	12.7189	-214.281	-237.604
2012-12-21 11:28:40	210.5	233.53	12.7258	-214.577	-238.053
2012-12-21 11:38:40	210.82	233.91	12.7327	-214.903	-238.44
2012-12-21 11:48:40	211.05	234.33	12.7397	-215.138	-238.869	2012-12-21 11:48:40
2012-12-21 11:58:40	211.34	234.77	12.7466	-215.433	-239.317
2012-12-21 12:08:40	211.84	235.23	12.7536	-215.943	-239.786
2012-12-21 12:18:40	212.22	235.64	12.7605	-216.33	-240.204
2012-12-21 12:28:40	212.38	236.05	12.7675	-216.493	-240.622
2012-12-21 12:38:40	212.67	236.51	12.7744	-216.789	-241.091
2012-12-21 12:48:40	212.89	236.9	12.7814	-217.013	-241.488	2012-12-21 12:48:40
2012-12-21 12:58:40	213.26	237.39	12.7883	-217.39	-241.988
2012-12-21 13:08:40	213.57	237.77	12.7952	-217.706	-242.375
2012-12-21 13:18:40	213.86	238.06	12.8022	-218.002	-242.671
2012-12-21 13:28:40	214.1	238.58	12.8091	-218.247	-243.201
2012-12-21 13:38:40	214.32	239.12	12.8161	-218.471	-243.751
2012-12-21 13:48:40	214.44	239.51	12.823	-218.593	-244.149	2012-12-21 13:48:40
2012-12-21 13:58:40	214.86	239.88	12.83	-219.021	-244.526
2012-12-21 14:08:40	215.22	240.4	12.8369	-219.388	-245.056
2012-12-21 14:18:40	215.5	240.91	12.8439	-219.674	-245.576
2012-12-21 14:28:40	215.84	241.38	12.8508	-220.02	-246.055
2012-12-21 14:38:40	216.08	241.77	12.8577	-220.265	-246.453
2012-12-21 14:48:40	216.37	242.28	12.8647	-220.561	-246.972	2012-12-21 14:48:40
2012-12-21 14:58:40	216.62	242.79	12.8716	-220.815	-247.492
2012-12-21 15:08:40	217.11	243.26	12.8786	-221.315	-247.971
2012-12-21 15:18:40	217.42	243.77	12.8855	-221.631	-248.491
2012-12-21 15:28:40	217.85	244.3	12.8925	-222.069	-249.032
2012-12-21 15:38:40	218.01	244.72	12.8994	-222.232	-249.46
2012-12-21 15:48:40	218.47	245.23	12.9064	-222.701	-249.98	2012-12-21 15:48:40
2012-12-21 15:58:40	218.88	245.76	12.9133	-223.119	-250.52
2012-12-21 16:08:40	219.08	246.26	12.9202	-223.323	-251.03
2012-12-21 16:18:40	219.3	246.84	12.9272	-223.547	-251.621
2012-12-21 16:28:40	219.62	247.36	12.9341	-223.874	-252.151
2012-12-21 16:38:40	219.94	247.83	12.9411	-224.2	-252.63
2012-12-21 16:48:40	220.16	248.26	12.948	-224.424	-253.068	2012-12-21 16:48:40
2012-12-21 16:58:40	220.33	248.89	12.955	-224.597	-253.71
2012-12-21 17:08:40	221	249.48	12.9619	-225.28	-254.312
2012-12-21 17:18:40	221.36	249.96	12.9689	-225.647	-254.801
2012-12-21 17:28:40	221.32	250.55	12.9758	-225.607	-255.403
2012-12-21 17:38:40	221.95	251.18	12.9827	-226.249	-256.045
2012-12-21 17:48:40	222.33	251.74	12.9897	-226.636	-256.616	2012-12-21 17:48:40
2012-12-21 17:58:40	222.75	252.19	12.9966	-227.064	-257.074
2012-12-21 18:08:40	223.01	252.81	13.0036	-227.329	-257.706
2012-12-21 18:18:40	223.61	253.42	13.0105	-227.941	-258.328
2012-12-21 18:28:40	223.74	253.99	13.0175	-228.073	-258.909
2012-12-21 18:38:40	220.1	252.33	13.0244	-224.363	-257.217
2012-12-21 18:48:40	223.89	254.27	13.0314	-228.226	-259.195	2012-12-21 18:48:40
2012-12-21 18:58:40	224.71	255.07	13.0383	-229.062	-260.01
2012-12-21 19:08:40	225.26	255.85	13.0452	-229.623	-260.805
2012-12-21 19:18:40	225.71	256.49	13.0522	-230.082	-261.458
2012-12-21 19:28:40	226.18	257.1	13.0591	-230.561	-262.08
2012-12-21 19:38:40	226.18	257.75	13.0661	-230.561	-262.742
2012-12-21 19:48:40	226.72	258.39	13.073	-231.111	-263.394	2012-12-21 19:48:40
2012-12-21 19:58:40	227.33	259.1	13.08	-231.733	-264.118
2012-12-21 20:08:40	227.89	259.73	13.0869	-232.304	-264.76
2012-12-21 20:18:40	228.41	260.29	13.0939	-232.834	-265.331
2012-12-21 20:28:40	228.71	260.88	13.1008	-233.14	-265.933
2012-12-21 20:38:40	229.1	261.52	13.1077	-233.537	-266.585
2012-12-21 20:48:40	229.64	262.16	13.1147	-234.088	-267.238	2012-12-21 20:48:40
2012-12-21 20:58:40	229.93	262.8	13.1216	-234.383	-267.89
2012-12-21 21:08:40	230.4	263.53	13.1286	-234.862	-268.634
2012-12-21 21:18:40	230.91	264.17	13.1355	-235.382	-269.286
2012-12-21 21:28:40	231.15	264.83	13.1425	-235.627	-269.959
2012-12-21 21:38:40	231.2	265.51	13.1494	-235.678	-270.652
2012-12-21 21:48:40	231.92	266.18	13.1564	-236.412	-271.335	2012-12-21 21:48:40
2012-12-21 21:58:40	232.57	266.77	13.1633	-237.074	-271.937
2012-12-21 22:08:40	233.05	267.62	13.1702	-237.564	-272.803
2012-12-21 22:18:40	233.42	268.3	13.1772	-237.941	-273.496
2012-12-21 22:28:40	233.88	268.98	13.1841	-238.41	-274.19
2012-12-21 22:38:40	234.25	269.7	13.1911	-238.787	-274.924
2012-12-21 22:48:40	234.68	270.29	13.198	-239.225	-275.525	2012-12-21 22:48:40
2012-12-21 22:58:40	235.23	271.21	13.205	-239.786	-276.463
2012-12-21 23:08:40	235.61	271.65	13.2119	-240.173	-276.911
2012-12-21 23:18:40	236.01	272.46	13.2189	-240.581	-277.737
2012-12-21 23:28:40	236.36	273.37	13.2258	-240.938	-278.665
2012-12-21 23:38:40	236.91	274.06	13.2327	-241.498	-279.368
2012-12-21 23:48:40	237.34	274.78	13.2397	-241.937	-280.102	2012-12-21 23:48:40
2012-12-21 23:58:40	237.89	275.61	13.2466	-242.497	-280.948
2012-12-22 00:08:40	238.31	276.35	13.2536	-242.926	-281.702
2012-12-22 00:18:40	238.7	277.01	13.2605	-243.323	-282.375
2012-12-22 00:28:40	239.31	277.9	13.2675	-243.945	-283.282
2012-12-22 00:38:40	239.79	278.63	13.2744	-244.434	-284.027
2012-12-22 00:48:40	240.27	279.32	13.2814	-244.924	-284.73	2012-12-22 00:48:40
2012-12-22 00:58:40	240.73	280.06	13.2883	-245.392	-285.484
2012-12-22 01:08:40	241.04	280.92	13.2952	-245.708	-286.361
2012-12-22 01:18:40	241.45	281.75	13.3022	-246.126	-287.207
2012-12-22 01:28:40	242	282.54	13.3091	-246.687	-288.012
2012-12-22 01:38:40	242.56	283.41	13.3161	-247.258	-288.899
2012-12-22 01:48:40	243.21	284.51	13.323	-247.92	-290.02	2012-12-22 01:48:40
2012-12-22 01:58:40	243.78	285.27	13.33	-248.502	-290.795
2012-12-22 02:08:40	244.37	286.14	13.3369	-249.103	-291.682
2012-12-22 02:18:40	245	286.99	13.3439	-249.745	-292.548
2012-12-22 02:28:40	245.54	287.83	13.3508	-250.296	-293.405
2012-12-22 02:38:40	245.93	288.66	13.3577	-250.693	-294.251
2012-12-22 02:48:40	246.42	289.59	13.3647	-251.193	-295.199	2012-12-22 02:48:40
2012-12-22 02:58:40	246.83	290.43	13.3716	-251.611	-296.055
2012-12-22 03:08:40	247.59	291.11	13.3786	-252.385	-296.748
2012-12-22 03:18:40	248.21	292.03	13.3855	-253.017	-297.686
2012-12-22 03:28:40	248.81	292.85	13.3925	-253.629	-298.522
2012-12-22 03:38:40	249.37	293.85	13.3994	-254.2	-299.541
2012-12-22 03:48:40	249.79	294.7	13.4064	-254.628	-300.408	2012-12-22 03:48:40
2012-12-22 03:58:40	250.02	295.61	13.4133	-254.862	-301.335
2012-12-22 04:08:40	250.81	296.5	13.4202	-255.668	-302.243
2012-12-22 04:18:40	251.17	297.31	13.4272	-256.035	-303.068
2012-12-22 04:28:40	251.79	298.33	13.4341	-256.667	-304.108
2012-12-22 04:38:40	252.3	299.32	13.4411	-257.187	-305.117
2012-12-22 04:48:40	252.9	300.22	13.448	-257.798	-306.035	2012-12-22 04:48:40
2012-12-22 04:58:40	253.64	301.05	13.455	-258.552	-306.881
2012-12-22 05:08:40	254.36	301.94	13.4619	-259.286	-307.788
2012-12-22 05:18:40	254.95	303.03	13.4689	-259.888	-308.899
2012-12-22 05:28:40	255.66	303.95	13.4758	-260.612	-309.837
2012-12-22 05:38:40	256.12	304.94	13.4827	-261.081	-310.846
2012-12-22 05:48:40	256.86	306.06	13.4897	-261.835	-311.988	2012-12-22 05:48:40
2012-12-22 05:58:40	257.48	307	13.4966	-262.467	-312.946
2012-12-22 06:08:40	257.84	307.89	13.5036	-262.834	-313.853
2012-12-22 06:18:40	258.32	308.99	13.5105	-263.323	-314.975
2012-12-22 06:28:40	259.16	310.02	13.5175	-264.179	-316.024
2012-12-22 06:38:40	259.9	311.09	13.5244	-264.934	-317.115
2012-12-22 06:48:40	260.48	312.16	13.5314	-265.525	-318.206	2012-12-22 06:48:40
2012-12-22 06:58:40	261.04	313.06	13.5383	-266.096	-319.123
2012-12-22 07:08:40	261.67	314.22	13.5452	-266.738	-320.306
2012-12-22 07:18:40	262.38	315.23	13.5522	-267.462	-321.335
2012-12-22 07:28:40	263.03	316.42	13.5591	-268.124	-322.548
2012-12-22 07:38:40	263.77	317.5	13.5661	-268.879	-323.649
2012-12-22 07:48:40	264.31	318.38	13.573	-269.429	-324.546	2012-12-22 07:48:40
2012-12-22 07:58:40	264.92	319.42	13.58	-270.051	-325.607
2012-12-22 08:08:40	265.68	320.72	13.5869	-270.826	-326.932
2012-12-22 08:18:40	266.23	321.81	13.5939	-271.386	-328.043
2012-12-22 08:28:40	266.99	323	13.6008	-272.161	-329.256
2012-12-22 08:38:40	267.73	324.12	13.6077	-272.915	-330.398
2012-12-22 08:48:40	268.46	325.34	13.6147	-273.66	-331.641	2012-12-22 08:48:40
2012-12-22 08:58:40	269.13	326	13.6216	-274.343	-332.314
2012-12-22 09:08:40	269.75	327.33	13.6286	-274.975	-333.67
2012-12-22 09:18:40	270.2	328.59	13.6355	-275.433	-334.954
2012-12-22 09:28:40	270.95	329.71	13.6425	-276.198	-336.096
2012-12-22 09:38:40	271.43	330.87	13.6494	-276.687	-337.278
2012-12-22 09:48:40	272.6	332.08	13.6564	-277.88	-338.512	2012-12-22 09:48:40
2012-12-22 09:58:40	265.87	329.02	13.6633	-271.019	-335.392
2012-12-22 10:08:40	271.64	333.16	13.6702	-276.901	-339.613
2012-12-22 10:18:40	273.85	334.84	13.6772	-279.154	-341.325
2012-12-22 10:28:40	274.98	336.02	13.6841	-280.306	-342.528
2012-12-22 10:38:40	276.11	336.7	13.6911	-281.458	-343.221
2012-12-22 10:48:40	277.25	338.78	13.698	-282.62	-345.341	2012-12-22 10:48:40
2012-12-22 10:58:40	278.33	340.14	13.705	-283.721	-346.728
2012-12-22 11:08:40	278.95	341.49	13.7119	-284.353	-348.104
2012-12-22 11:18:40	279.91	342.84	13.7189	-285.331	-349.48
2012-12-22 11:28:40	280.8	343.9	13.7258	-286.239	-350.561
2012-12-22 11:38:40	281.72	345.45	13.7327	-287.176	-352.141
2012-12-22 11:48:40	282.68	346.74	13.7397	-288.155	-353.456	2012-12-22 11:48:40
2012-12-22 11:58:40	283.15	348.31	13.7466	-288.634	-355.056
2012-12-22 12:08:40	284.47	349.68	13.7536	-289.98	-356.453
2012-12-22 12:18:40	285.46	351.13	13.7605	-290.989	-357.931
2012-12-22 12:28:40	286.36	352.19	13.7675	-291.906	-359.011
2012-12-22 12:38:40	287.26	353.61	13.7744	-292.824	-360.459
2012-12-22 12:48:40	288.28	355.27	13.7814	-293.863	-362.151	2012-12-22 12:48:40
2012-12-22 12:58:40	288.93	356.63	13.7883	-294.526	-363.537
2012-12-22 13:08:40	289.86	357.95	13.7952	-295.474	-364.883
2012-12-22 13:18:40	290.87	359.42	13.8022	-296.504	-366.381
2012-12-22 13:28:40	291.41	360.84	13.8091	-297.054	-367.829
2012-12-22 13:38:40	292.32	362.37	13.8161	-297.982	-369.388
2012-12-22 13:48:40	293.15	363.74	13.823	-298.828	-370.785	2012-12-22 13:48:40
2012-12-22 13:58:40	293.21	365.22	13.83	-298.889	-372.294
2012-12-22 14:08:40	294.73	366.44	13.8369	-300.438	-373.537
2012-12-22 14:18:40	295.63	368.06	13.8439	-301.356	-375.189
2012-12-22 14:28:40	296.9	369.69	13.8508	-302.65	-376.85
2012-12-22 14:38:40	297.75	371.36	13.8577	-303.517	-378.552
2012-12-22 14:48:40	298.74	372.97	13.8647	-304.526	-380.194	2012-12-22 14:48:40
2012-12-22 14:58:40	299.55	374.46	13.8716	-305.352	-381.713
2012-12-22 15:08:40	299.93	376.19	13.8786	-305.739	-383.476
2012-12-22 15:18:40	301.62	377.48	13.8855	-307.462	-384.791
2012-12-22 15:28:40	301.54	378.81	13.8925	-307.38	-386.147
2012-12-22 15:38:40	303.64	380.45	13.8994	-309.521	-387.819
2012-12-22 15:48:40	304.66	382.01	13.9064	-310.561	-389.409	2012-12-22 15:48:40
2012-12-22 15:58:40	305.68	383.95	13.9133	-311.6	-391.386
2012-12-22 16:08:40	306.12	385.57	13.9202	-312.049	-393.038
2012-12-22 16:18:40	307.25	387.29	13.9272	-313.201	-394.791
2012-12-22 16:28:40	308.47	389.23	13.9341	-314.444	-396.769
2012-12-22 16:38:40	309.62	390.77	13.9411	-315.617	-398.338
2012-12-22 16:48:40	310.43	392.68	13.948	-316.442	-400.285	2012-12-22 16:48:40
2012-12-22 16:58:40	311.8	393.44	13.955	-317.839	-401.06
2012-12-22 17:08:40	312.83	396.02	13.9619	-318.889	-403.69
2012-12-22 17:18:40	313.75	397.78	13.9689	-319.827	-405.484
2012-12-22 17:28:40	314.31	399.37	13.9758	-320.398	-407.105
2012-12-22 17:38:40	313.98	401.34	13.9827	-320.061	-409.113
2012-12-22 17:48:40	316.84	402.92	13.9897	-322.977	-410.724	2012-12-22 17:48:40
2012-12-22 17:58:40	318.44	404.99	13.9966	-324.608	-412.834
2012-12-22 18:08:40	319.6	407.32	14.0036	-325.79	-415.209
2012-12-22 18:18:40	320.77	408.89	14.0105	-326.983	-416.809
2012-12-22 18:28:40	321.15	410.73	14.0175	-327.37	-418.685
2012-12-22 18:38:40	322.36	412.72	14.0244	-328.603	-420.714
2012-12-22 18:48:40	323.9	414.78	14.0314	-330.173	-422.813	2012-12-22 18:48:40
2012-12-22 18:58:40	325.22	416.89	14.0383	-331.519	-424.964
2012-12-22 19:08:40	326.53	418.62	14.0452	-332.854	-426.728
2012-12-22 19:18:40	326.64	420.43	14.0522	-332.966	-428.573
2012-12-22 19:28:40	317.82	415.22	14.0591	-323.976	-423.262
2012-12-22 19:38:40	326.92	422.38	14.0661	-333.252	-430.561
2012-12-22 19:48:40	330.67	425.2	14.073	-337.074	-433.435	2012-12-22 19:48:40
2012-12-22 19:58:40	333.09	427.85	14.08	-339.541	-436.137
2012-12-22 20:08:40	334.68	429.27	14.0869	-341.162	-437.584
2012-12-22 20:18:40	336.38	432.36	14.0939	-342.895	-440.734
2012-12-22 20:28:40	337.93	434.32	14.1008	-344.475	-442.732
2012-12-22 20:38:40	339.58	436.36	14.1077	-346.157	-444.811
2012-12-22 20:48:40	340.83	438.68	14.1147	-347.431	-447.176	2012-12-22 20:48:40
2012-12-22 20:58:40	342.24	440.75	14.1216	-348.869	-449.286
2012-12-22 21:08:40	343.95	443.21	14.1286	-350.612	-451.794
2012-12-22 21:18:40	345.34	445.17	14.1355	-352.029	-453.792
2012-12-22 21:28:40	346.65	447.19	14.1425	-353.364	-455.851
2012-12-22 21:38:40	348.1	449.33	14.1494	-354.842	-458.033
2012-12-22 21:48:40	349.61	451.63	14.1564	-356.381	-460.377	2012-12-22 21:48:40
2012-12-22 21:58:40	351.03	453.9	14.1633	-357.829	-462.691
2012-12-22 22:08:40	352.22	456.16	14.1702	-359.042	-464.995
2012-12-22 22:18:40	354.28	459.15	14.1772	-361.142	-468.043
2012-12-22 22:28:40	355.94	461.35	14.1841	-362.834	-470.285
2012-12-22 22:38:40	357.35	463.33	14.1911	-364.271	-472.304
2012-12-22 22:48:40	358.82	465.95	14.198	-365.77	-474.975	2012-12-22 22:48:40
2012-12-22 22:58:40	360.25	468.15	14.205	-367.227	-477.217
2012-12-22 23:08:40	361.87	470.51	14.2119	-368.879	-479.623
2012-12-22 23:18:40	363.48	472.72	14.2189	-370.52	-481.876
2012-12-22 23:28:40	364.73	475.57	14.2258	-371.794	-484.781
2012-12-22 23:38:40	366.03	477.6	14.2327	-373.119	-486.85
2012-12-22 23:48:40	367.14	479.85	14.2397	-374.251	-489.144	2012-12-22 23:48:40
2012-12-22 23:58:40	368.77	482.78	14.2466	-375.912	-492.13
2012-12-23 00:08:40	370.32	485.36	14.2536	-377.492	-494.76
2012-12-23 00:18:40	371.57	487.53	14.2605	-378.767	-496.972
2012-12-23 00:28:40	372.99	489.6	14.2675	-380.214	-499.083
2012-12-23 00:38:40	374.7	491.37	14.2744	-381.957	-500.887
2012-12-23 00:48:40	376.47	494.79	14.2814	-383.761	-504.373	2012-12-23 00:48:40
2012-12-23 00:58:40	377.75	497.1	14.2883	-385.066	-506.728
2012-12-23 01:08:40	379.47	499.83	14.2952	-386.82	-509.511
2012-12-23 01:18:40	381.18	502.91	14.3022	-388.563	-512.65
2012-12-23 01:28:40	382.62	505.34	14.3091	-390.031	-515.127
2012-12-23 01:38:40	384.46	508.06	14.3161	-391.906	-517.9
2012-12-23 01:48:40	386.01	510.27	14.323	-393.486	-520.153	2012-12-23 01:48:40
2012-12-23 01:58:40	387.08	513.15	14.33	-394.577	-523.089
2012-12-23 02:08:40	388.82	515.55	14.3369	-396.351	-525.535
2012-12-23 02:18:40	391.02	518.32	14.3439	-398.593	-528.359
2012-12-23 02:28:40	392.65	521.16	14.3508	-400.255	-531.254
2012-12-23 02:38:40	394.27	524.63	14.3577	-401.906	-534.791
2012-12-23 02:48:40	395.97	526.99	14.3647	-403.639	-537.197	2012-12-23 02:48:40
2012-12-23 02:58:40	397.54	530.4	14.3716	-405.24	-540.673
2012-12-23 03:08:40	399.38	532.9	14.3786	-407.115	-543.221
2012-12-23 03:18:40	400.31	535.92	14.3855	-408.063	-546.3
2012-12-23 03:28:40	402.57	539.25	14.3925	-410.367	-549.694
2012-12-23 03:38:40	404.34	541.8	14.3994	-412.171	-552.294
2012-12-23 03:48:40	406.11	544.78	14.4064	-413.976	-555.331	2012-12-23 03:48:40
2012-12-23 03:58:40	408.11	547.45	14.4133	-416.014	-558.053
2012-12-23 04:08:40	409.02	550.23	14.4202	-416.942	-560.887
2012-12-23 04:18:40	411.01	553.33	14.4272	-418.97	-564.047
2012-12-23 04:28:40	413.11	556.99	14.4341	-421.111	-567.778
2012-12-23 04:38:40	415.47	560.02	14.4411	-423.517	-570.866
2012-12-23 04:48:40	417.67	563.72	14.448	-425.759	-574.638	2012-12-23 04:48:40
2012-12-23 04:58:40	419.34	566.39	14.455	-427.462	-577.36
2012-12-23 05:08:40	421.41	569.53	14.4619	-429.572	-580.561
2012-12-23 05:18:40	423.61	572.3	14.4689	-431.814	-583.384
2012-12-23 05:28:40	425.62	575.85	14.4758	-433.863	-587.003
2012-12-23 05:38:40	427.77	579.18	14.4827	-436.055	-590.398
2012-12-23 05:48:40	430.01	582.01	14.4897	-438.338	-593.282	2012-12-23 05:48:40
2012-12-23 05:58:40	431.6	585.91	14.4966	-439.959	-597.258
2012-12-23 06:08:40	434	588.82	14.5036	-442.406	-600.224
2012-12-23 06:18:40	435.41	592.88	14.5105	-443.843	-604.363
2012-12-23 06:28:40	437.79	596.91	14.5175	-446.269	-608.471
2012-12-23 06:38:40	440.14	600.3	14.5244	-448.665	-611.927
2012-12-23 06:48:40	442.47	603.93	14.5314	-451.04	-615.627	2012-12-23 06:48:40
2012-12-23 06:58:40	441.23	607.36	14.5383	-449.776	-619.123
2012-12-23 07:08:40	446.71	611.1	14.5452	-455.362	-622.936
2012-12-23 07:18:40	448.28	614.42	14.5522	-456.962	-626.32
2012-12-23 07:28:40	450.85	618.52	14.5591	-459.582	-630.499
2012-12-23 07:38:40	452.53	622.33	14.5661	-461.295	-634.383
2012-12-23 07:48:40	455.27	625.66	14.573	-464.088	-637.778	2012-12-23 07:48:40
2012-12-23 07:58:40	457.85	628.3	14.58	-466.718	-640.469
2012-12-23 08:08:40	459.99	632.13	14.5869	-468.899	-644.373
[truncated: 1,181 more rows]

## Sheet: Tensi
Zeit [d]	MP bot(2) [cm]	MP top(1) [cm]		air entry bot		AE time	AE [cm]	Type	Pos	Weight
0.00389504	-3.83282	-6.41182		2012-12-28 12:38:40	8800	19.7744	-8970.44	1	2	1
0.0108395	-4.37309	-6.9317
0.0177839	-4.78084	-7.32926		air entry top
0.0247284	-5.1682	-7.70642		Time				Type	Pos	Weight
0.0608395	-6.88073	-9.42915		2012-12-25 11:18:40	8800	16.7188	-8970.44	1	1	1
0.102506	-8.3894	-10.9276
0.144173	-9.84709	-12.3853
0.185839	-11.1417	-13.6799
0.227506	-12.2426	-14.791
0.269173	-13.1702	-15.7085
0.310839	-14.0163	-16.5545
1.79802	-18.5321	-21.0601
1.80219	-18.5219	-21.0601
1.80635	-18.5015	-21.0398
1.81052	-18.5423	-21.0703
1.81469	-18.5423	-21.0805
1.81885	-18.5933	-21.1213
1.82302	-18.5831	-21.1315
1.82719	-18.6239	-21.1519
1.83135	-18.685	-21.1723
1.83552	-18.6646	-21.1723
1.86469	-18.8073	-21.3456
1.90635	-19.0622	-21.58
1.94802	-19.2457	-21.7533
1.98969	-18.8889	-21.4169
2.03135	-19.5209	-22.0489
2.07302	-19.7554	-22.2834
2.11469	-19.9083	-22.4057
2.15635	-20.0306	-22.5484
2.19802	-20.0204	-22.5382
2.23969	-20.2039	-22.7319
2.28135	-20.3568	-22.8644
2.32302	-20.5301	-23.0581
2.36469	-20.632	-23.1498
2.40635	-20.8053	-23.3129
2.44802	-20.9786	-23.4964
2.48969	-21.0907	-23.6188
2.53135	-21.2946	-23.8124
2.57302	-21.4169	-23.945
2.61469	-21.5596	-24.0775
2.65635	-21.7023	-24.21
2.69802	-21.8349	-24.3527
2.73969	-22.0082	-24.5056
2.78135	-22.0999	-24.5872
2.82302	-22.2222	-24.7197
2.86469	-22.3955	-24.8828
2.90635	-22.5076	-25.0051
2.94802	-22.6707	-25.1682
2.98969	-22.63	-25.1274
3.03135	-22.9256	-25.423
3.07302	-23.1397	-25.6269
3.11469	-23.2416	-25.7288
3.15635	-23.476	-25.9531
3.19802	-23.6391	-26.1162
3.23969	-23.792	-26.2793
3.28135	-23.9653	-26.4526
3.32302	-24.1284	-26.6055
3.36469	-24.2712	-26.7482
3.40635	-24.3221	-26.7992
3.44802	-24.5362	-27.0133
3.48969	-24.6993	-27.1764
3.53135	-24.8522	-27.3191
3.57302	-25.0153	-27.4822
3.61469	-25.1784	-27.6555
3.65635	-25.3109	-27.8084
3.69802	-25.423	-27.9103
3.73969	-25.6575	-28.1549
3.78135	-25.8206	-28.318
3.82302	-25.9225	-28.42
3.86469	-26.1162	-28.6137
3.90635	-26.2997	-28.7971
3.94802	-26.4628	-28.9297
3.98969	-26.5953	-29.0826
4.03135	-26.7482	-29.2253
4.07302	-26.9521	-29.4393
4.11469	-27.1152	-29.5923
4.15635	-27.3293	-29.8063
4.19802	-27.5229	-29.9898
4.23969	-27.6758	-30.1529
4.28135	-27.8899	-30.3364
4.32302	-28.0632	-30.5403
4.36469	-28.2773	-30.7441
4.40635	-28.42	-30.8869
4.44802	-28.6137	-31.0907
4.48969	-28.8481	-31.315
4.53135	-29.052	-31.5291
4.57302	-29.2661	-31.7329
4.61469	-29.4292	-31.9062
4.65635	-29.6228	-32.1101
4.69802	-29.8063	-32.2936
4.73969	-30	-32.4873
4.78135	-30.2141	-32.7319
4.82302	-30.3568	-32.8033
4.86469	-30.5708	-33.0275
4.90635	-30.948	-33.4149
4.94802	-31.3048	-33.7207
4.98969	-31.6106	-34.0469
5.03135	-31.9368	-34.3833
5.07302	-32.2732	-34.7299
5.11469	-32.6198	-35.0561
5.15635	-32.9867	-35.4027
5.19802	-33.2824	-35.6983
5.23969	-33.5882	-35.9837
5.28135	-33.8736	-36.2895
5.32302	-34.1692	-36.5851
5.36469	-34.5464	-36.9521
5.40635	-34.8522	-37.2579
5.44802	-35.1886	-37.6045
5.48969	-35.5454	-37.9511
5.53135	-35.9327	-38.3486
5.57302	-36.2895	-38.6952
5.61469	-36.4934	-38.8991
5.65635	-36.8094	-39.2151
5.69802	-37.2171	-39.6228
5.73969	-37.5331	-39.9286
5.78135	-37.9103	-40.3058
5.82302	-38.3078	-40.6932
5.86469	-38.6646	-41.0601
5.90635	-39.0622	-41.4577
5.94802	-39.4903	-41.8654
5.98969	-39.949	-42.3242
6.03135	-40.4179	-42.8135
6.07302	-40.7951	-43.16
6.11469	-41.2029	-43.5474
6.15635	-41.6922	-44.0571
6.19802	-42.2018	-44.5668
6.23969	-42.7115	-45.0561
6.28135	-43.1702	-45.5454
6.32302	-43.6493	-46.0143
6.36469	-44.1386	-46.5138
6.40635	-44.6483	-46.9725
6.44802	-45.1172	-47.4618
6.48969	-45.5861	-47.9307
6.53135	-46.1162	-48.4811
6.57302	-46.6463	-49.001
6.61469	-47.1764	-49.5107
6.65635	-47.7268	-50.0612
6.69802	-48.2161	-50.5708
6.73969	-48.6137	-50.9582
6.78135	-49.1539	-51.4781
6.82302	-49.7146	-52.0591
6.86469	-50.2854	-52.6198
6.90635	-50.8665	-53.1906
6.94802	-51.4679	-53.7819
6.98969	-52.0183	-54.3527
7.03135	-52.6809	-55.0051
7.07302	-53.3741	-55.7085
7.11469	-54.0571	-56.3812
7.15635	-54.7401	-57.0744
7.19802	-55.474	-57.8186
7.23969	-56.1672	-58.5015
7.28135	-56.8705	-59.2253
7.32302	-57.6453	-59.9694
7.36469	-58.4302	-60.7339
7.40635	-59.1641	-61.4781
7.44802	-59.9694	-62.3038
7.48969	-60.8257	-63.1702
7.53135	-61.6412	-63.9857
7.57302	-62.4873	-64.8012
7.61469	-63.3537	-65.6575
7.65635	-64.1692	-66.4934
7.69802	-65.0459	-67.3598
7.73969	-65.8614	-68.2365
7.78135	-66.8094	-69.1641
7.82302	-67.7472	-70.0815
7.86469	-68.4709	-70.8155
7.90635	-69.5005	-71.8451
7.94802	-70.4995	-72.844
7.98969	-71.5189	-73.8634
8.03135	-72.5994	-74.9439
8.07302	-73.6697	-75.9939
8.11469	-74.6483	-77.0133
8.15635	-75.7594	-78.0734
8.19802	-76.8094	-79.1539
8.23969	-77.8084	-80.1733
8.28135	-78.8787	-81.2436
8.32302	-79.9286	-82.2936
8.36469	-81.0194	-83.3843
8.40635	-82.0999	-84.4648
8.44802	-83.2008	-85.5657
8.48969	-84.2406	-86.6157
8.53135	-85.3823	-87.7778
8.57302	-86.5341	-88.9195
8.61469	-87.7472	-90.1223
8.65635	-88.7564	-91.0907
8.69802	-90.051	-92.3955
8.73969	-91.3965	-93.7411
8.78135	-92.895	-95.2396
8.82302	-94.3221	-96.6565
8.86469	-95.8002	-98.1244
8.90635	-97.2987	-99.633
8.94802	-98.7462	-101.131
8.98969	-100.245	-102.63
9.03135	-101.774	-104.2
9.07302	-103.456	-105.872
9.11469	-105.148	-107.554
9.15635	-106.86	-109.297
9.19802	-108.573	-111.04
9.23969	-110.306	-112.783
9.28135	-112.059	-114.557
9.32302	-113.874	-116.412
9.36469	-115.749	-118.318
9.40635	-117.513	-120.102
9.44802	-119.297	-121.916
9.48969	-121.142	-123.761
9.53135	-122.844	-125.556
9.57302	-124.557	-127.217
9.61469	-125.912	-128.563
9.65635	-127.431	-130.112
9.69802	-128.96	-131.651
9.73969	-130.54	-133.262
9.78135	-132.141	-134.842
9.82302	-133.741	-136.524
9.86469	-135.27	-138.094
9.90635	-136.789	-139.643
9.94802	-138.073	-140.989
9.98969	-139.45	-142.365
10.0314	-140.805	-143.802
10.073	-142.222	-145.189
10.1147	-143.71	-146.769
10.1564	-145.036	-148.084
10.198	-146.279	-149.388
10.2397	-147.523	-150.663
10.2814	-148.756	-151.896
10.323	-149.929	-153.16
10.3647	-151.142	-154.434
10.4064	-152.345	-155.719
10.448	-153.486	-156.942
10.4897	-154.648	-158.145
10.5314	-155.729	-159.337
10.573	-156.86	-160.581
10.6147	-157.839	-161.794
10.6564	-159.113	-163.14
10.698	-160.296	-164.404
10.7397	-161.427	-165.657
10.7814	-162.508	-166.799
10.823	-163.629	-168.094
10.8647	-164.699	-169.286
10.9064	-165.708	-170.51
10.948	-166.524	-171.56
10.9897	-167.676	-172.854
11.0314	-168.695	-174.128
11.073	-169.745	-175.464
11.1147	-170.785	-176.789
11.1564	-171.804	-178.084
11.198	-172.803	-179.368
11.2397	-173.751	-180.561
11.2814	-174.689	-181.855
11.323	-175.505	-183.129
11.3647	-176.606	-184.414
11.4064	-177.523	-185.729
11.448	-178.461	-187.044
11.4897	-179.358	-188.328
11.5314	-180.265	-189.684
11.573	-181.152	-190.775
11.6147	-181.937	-191.916
11.6564	-182.987	-193.282
11.698	-183.914	-194.801
11.7397	-184.893	-196.035
11.7814	-185.596	-197.299
11.823	-187.064	-199.123
11.8647	-188.145	-200.663
11.9064	-189.256	-202.192
11.948	-190.255	-203.67
11.9897	-191.019	-204.811
12.0314	-192.385	-206.493
12.073	-193.558	-208.043
12.1147	-194.75	-209.613
12.1564	-195.902	-211.193
12.198	-197.074	-212.783
12.2397	-198.308	-214.414
12.2814	-199.501	-216.075
12.323	-200.785	-217.635
12.3647	-202.243	-219.633
12.4064	-203.405	-221.539
12.448	-204.883	-223.496
12.4897	-206.137	-225.484
12.5314	-207.421	-227.594
12.573	-208.838	-229.776
12.6147	-209.847	-231.427
12.6564	-211.702	-234.006
12.698	-213.476	-236.432
12.7397	-215.138	-238.869
12.7814	-217.013	-241.488
12.823	-218.593	-244.149
12.8647	-220.561	-246.972
12.9064	-222.701	-249.98
12.948	-224.424	-253.068
12.9897	-226.636	-256.616
13.0314	-228.226	-259.195
13.073	-231.111	-263.394
13.1147	-234.088	-267.238
13.1564	-236.412	-271.335
13.198	-239.225	-275.525
13.2397	-241.937	-280.102
13.2814	-244.924	-284.73
13.323	-247.92	-290.02
13.3647	-251.193	-295.199
13.4064	-254.628	-300.408
13.448	-257.798	-306.035
13.4897	-261.835	-311.988
13.5314	-265.525	-318.206
13.573	-269.429	-324.546
13.6147	-273.66	-331.641
13.6564	-277.88	-338.512
13.698	-282.62	-345.341
13.7397	-288.155	-353.456
13.7814	-293.863	-362.151
13.823	-298.828	-370.785
13.8647	-304.526	-380.194
13.9064	-310.561	-389.409
13.948	-316.442	-400.285
13.9897	-322.977	-410.724
14.0314	-330.173	-422.813
14.073	-337.074	-433.435
14.1147	-347.431	-447.176
14.1564	-356.381	-460.377
14.198	-365.77	-474.975
14.2397	-374.251	-489.144
14.2814	-383.761	-504.373
14.323	-393.486	-520.153
14.3647	-403.639	-537.197
14.4064	-413.976	-555.331
14.448	-425.759	-574.638
14.4897	-438.338	-593.282
14.5314	-451.04	-615.627
14.573	-464.088	-637.778
14.6147	-430.234
14.6564	-493.619
14.698	-513.242
14.7397	-527.788
14.7814	-546.106
14.823	-563.466
14.8647	-578.369
14.9064	-600.092
14.948	-619.164
14.9897	-640.938
15.0314	-662.1
15.073	-682.426
15.1147	-705.81
15.1564	-728.593
15.198	-755.668
15.2397	-780.866
15.2814	-812.793
15.323	-848.328
15.3647	-883.853
15.4064	-921.05
15.448	-958.593
15.4897	-993.843
15.5314	-1033.47
15.573	-1076.48
15.6147	-1119.41
15.6564	-1163
15.698	-1207.01
15.7397	-1250.65
15.7814	-1305.68
15.823	-1360.24
15.8647	-1413.73
15.9064	-1464.65
15.948	-1513.28
15.9897	-1566.85
16.0244	-1612.92

## Sheet: HYDRUS
Data für die Zielfunktion: 2 x Tensionen, 1 x Endwassergehalt					Verdunstungsrate
Time	Obs	Type	Pos	Weight	Zeitintervall		Evarate [cm/d]			Type	1-Tension	2-Wassergehalt
0.00389504	-3.83282	1	2	1	0.743695	0	0.414137			Pos	1-top	2-bot	(von oben nach unten)
0.0108395	-4.37309	1	2	1	1.07286	0	0.385974			32	Time-Variable boundary conditions+
0.0177839	-4.78084	1	2	1	1.64049	0	0.369313			20.652	Final Time	Time Information
0.0247284	-5.1682	1	2	1	1.98524	0	0.320376			723	Number of Data Points in Objective Function
0.0608395	-6.88073	1	2	1	2.21451	0	0.307466		Interpolated Values	-5.19535	BC-top	[hPa]
0.102506	-8.3894	1	2	1	2.74534	0	0.320406			-3.94535	MP_top_ini	[hPa]	1
0.144173	-9.84709	1	2	1	2.97695	0	0.33532			-0.940528	MP_bot_ini	[hPa]	2
0.185839	-11.1417	1	2	1	3.63936	0	0.32451			0.309472	BC-bot	[hPa]
0.227506	-12.2426	1	2	1	4.66126	0	0.314425
0.269173	-13.1702	1	2	1	5.16426	0	0.345064
0.310839	-14.0163	1	2	1	5.63826	0	0.32553
1.79802	-18.5321	1	2	1	6.083	0	0.315626		Real Values	-7.7026	BC-top	[cm]
1.80219	-18.5219	1	2	1	6.73818	0	0.291183			-6.4526	MP_top_ini	[cm]
1.80635	-18.5015	1	2	1	7.85925	0	0.263214			-3.91437	MP_bot_ini	[cm]
1.81052	-18.5423	1	2	1	8.62515	0	0.264342			-2.66437	BC-bot	[cm]
1.81469	-18.5423	1	2	1	9.60181	0	0.279263
1.81885	-18.5933	1	2	1	9.93441	0	0.242751
1.82302	-18.5831	1	2	1	10.5879	0	0.227028
1.82719	-18.6239	1	2	1	10.9442	0	0.246131
1.83135	-18.685	1	2	1	11.5989	0	0.253857
1.83552	-18.6646	1	2	1	11.9729	0	0.267903
1.86469	-18.8073	1	2	1	12.5923	0	0.260705
1.90635	-19.0622	1	2	1	13.0193	0	0.26249
1.94802	-19.2457	1	2	1	13.6574	0	0.241808
1.98969	-18.8889	1	2	1	14.0535	0	0.208522
2.03135	-19.5209	1	2	1	14.6145	0	0.179341
2.07302	-19.7554	1	2	1	16.7376	0	0.125476
2.11469	-19.9083	1	2	1	17.8588	0	0.0813309
2.15635	-20.0306	1	2	1	18.7487	0	0.0649362
2.19802	-20.0204	1	2	1	19.0073	0	0.0570499
2.23969	-20.2039	1	2	1	19.6537	0	0.0573819
2.28135	-20.3568	1	2	1	20.652	0	0.04748
2.32302	-20.5301	1	2	1
2.36469	-20.632	1	2	1
2.40635	-20.8053	1	2	1
2.44802	-20.9786	1	2	1
2.48969	-21.0907	1	2	1
2.53135	-21.2946	1	2	1
2.57302	-21.4169	1	2	1
2.61469	-21.5596	1	2	1
2.65635	-21.7023	1	2	1
2.69802	-21.8349	1	2	1
2.73969	-22.0082	1	2	1
2.78135	-22.0999	1	2	1
2.82302	-22.2222	1	2	1
2.86469	-22.3955	1	2	1
2.90635	-22.5076	1	2	1
2.94802	-22.6707	1	2	1
2.98969	-22.63	1	2	1
3.03135	-22.9256	1	2	1
3.07302	-23.1397	1	2	1
3.11469	-23.2416	1	2	1
3.15635	-23.476	1	2	1
3.19802	-23.6391	1	2	1
3.23969	-23.792	1	2	1
3.28135	-23.9653	1	2	1
3.32302	-24.1284	1	2	1
3.36469	-24.2712	1	2	1
3.40635	-24.3221	1	2	1
3.44802	-24.5362	1	2	1
3.48969	-24.6993	1	2	1
3.53135	-24.8522	1	2	1
3.57302	-25.0153	1	2	1
3.61469	-25.1784	1	2	1
3.65635	-25.3109	1	2	1
3.69802	-25.423	1	2	1
3.73969	-25.6575	1	2	1
3.78135	-25.8206	1	2	1
3.82302	-25.9225	1	2	1
3.86469	-26.1162	1	2	1
3.90635	-26.2997	1	2	1
3.94802	-26.4628	1	2	1
3.98969	-26.5953	1	2	1
4.03135	-26.7482	1	2	1
4.07302	-26.9521	1	2	1
4.11469	-27.1152	1	2	1
4.15635	-27.3293	1	2	1
4.19802	-27.5229	1	2	1
4.23969	-27.6758	1	2	1
4.28135	-27.8899	1	2	1
4.32302	-28.0632	1	2	1
4.36469	-28.2773	1	2	1
4.40635	-28.42	1	2	1
4.44802	-28.6137	1	2	1
4.48969	-28.8481	1	2	1
4.53135	-29.052	1	2	1
4.57302	-29.2661	1	2	1
4.61469	-29.4292	1	2	1
4.65635	-29.6228	1	2	1
4.69802	-29.8063	1	2	1
4.73969	-30	1	2	1
4.78135	-30.2141	1	2	1
4.82302	-30.3568	1	2	1
4.86469	-30.5708	1	2	1
4.90635	-30.948	1	2	1
4.94802	-31.3048	1	2	1
4.98969	-31.6106	1	2	1
5.03135	-31.9368	1	2	1
5.07302	-32.2732	1	2	1
5.11469	-32.6198	1	2	1
5.15635	-32.9867	1	2	1
5.19802	-33.2824	1	2	1
5.23969	-33.5882	1	2	1
5.28135	-33.8736	1	2	1
5.32302	-34.1692	1	2	1
5.36469	-34.5464	1	2	1
5.40635	-34.8522	1	2	1
5.44802	-35.1886	1	2	1
5.48969	-35.5454	1	2	1
5.53135	-35.9327	1	2	1
5.57302	-36.2895	1	2	1
5.61469	-36.4934	1	2	1
5.65635	-36.8094	1	2	1
5.69802	-37.2171	1	2	1
5.73969	-37.5331	1	2	1
5.78135	-37.9103	1	2	1
5.82302	-38.3078	1	2	1
5.86469	-38.6646	1	2	1
5.90635	-39.0622	1	2	1
5.94802	-39.4903	1	2	1
5.98969	-39.949	1	2	1
6.03135	-40.4179	1	2	1
6.07302	-40.7951	1	2	1
6.11469	-41.2029	1	2	1
6.15635	-41.6922	1	2	1
6.19802	-42.2018	1	2	1
6.23969	-42.7115	1	2	1
6.28135	-43.1702	1	2	1
6.32302	-43.6493	1	2	1
6.36469	-44.1386	1	2	1
6.40635	-44.6483	1	2	1
6.44802	-45.1172	1	2	1
6.48969	-45.5861	1	2	1
6.53135	-46.1162	1	2	1
6.57302	-46.6463	1	2	1
6.61469	-47.1764	1	2	1
6.65635	-47.7268	1	2	1
6.69802	-48.2161	1	2	1
6.73969	-48.6137	1	2	1
6.78135	-49.1539	1	2	1
6.82302	-49.7146	1	2	1
6.86469	-50.2854	1	2	1
6.90635	-50.8665	1	2	1
6.94802	-51.4679	1	2	1
6.98969	-52.0183	1	2	1
7.03135	-52.6809	1	2	1
7.07302	-53.3741	1	2	1
7.11469	-54.0571	1	2	1
7.15635	-54.7401	1	2	1
7.19802	-55.474	1	2	1
7.23969	-56.1672	1	2	1
7.28135	-56.8705	1	2	1
7.32302	-57.6453	1	2	1
7.36469	-58.4302	1	2	1
7.40635	-59.1641	1	2	1
7.44802	-59.9694	1	2	1
7.48969	-60.8257	1	2	1
7.53135	-61.6412	1	2	1
7.57302	-62.4873	1	2	1
7.61469	-63.3537	1	2	1
7.65635	-64.1692	1	2	1
7.69802	-65.0459	1	2	1
7.73969	-65.8614	1	2	1
7.78135	-66.8094	1	2	1
7.82302	-67.7472	1	2	1
7.86469	-68.4709	1	2	1
7.90635	-69.5005	1	2	1
7.94802	-70.4995	1	2	1
7.98969	-71.5189	1	2	1
8.03135	-72.5994	1	2	1
8.07302	-73.6697	1	2	1
8.11469	-74.6483	1	2	1
8.15635	-75.7594	1	2	1
8.19802	-76.8094	1	2	1
8.23969	-77.8084	1	2	1
8.28135	-78.8787	1	2	1
8.32302	-79.9286	1	2	1
8.36469	-81.0194	1	2	1
8.40635	-82.0999	1	2	1
8.44802	-83.2008	1	2	1
8.48969	-84.2406	1	2	1
8.53135	-85.3823	1	2	1
8.57302	-86.5341	1	2	1
8.61469	-87.7472	1	2	1
8.65635	-88.7564	1	2	1
8.69802	-90.051	1	2	1
8.73969	-91.3965	1	2	1
8.78135	-92.895	1	2	1
8.82302	-94.3221	1	2	1
8.86469	-95.8002	1	2	1
8.90635	-97.2987	1	2	1
8.94802	-98.7462	1	2	1
8.98969	-100.245	1	2	1
9.03135	-101.774	1	2	1
9.07302	-103.456	1	2	1
9.11469	-105.148	1	2	1
9.15635	-106.86	1	2	1
9.19802	-108.573	1	2	1
9.23969	-110.306	1	2	1
9.28135	-112.059	1	2	1
9.32302	-113.874	1	2	1
9.36469	-115.749	1	2	1
9.40635	-117.513	1	2	1
9.44802	-119.297	1	2	1
9.48969	-121.142	1	2	1
9.53135	-122.844	1	2	1
9.57302	-124.557	1	2	1
9.61469	-125.912	1	2	1
9.65635	-127.431	1	2	1
9.69802	-128.96	1	2	1
9.73969	-130.54	1	2	1
9.78135	-132.141	1	2	1
9.82302	-133.741	1	2	1
9.86469	-135.27	1	2	1
9.90635	-136.789	1	2	1
9.94802	-138.073	1	2	1
9.98969	-139.45	1	2	1
10.0314	-140.805	1	2	1
10.073	-142.222	1	2	1
10.1147	-143.71	1	2	1
10.1564	-145.036	1	2	1
10.198	-146.279	1	2	1
10.2397	-147.523	1	2	1
10.2814	-148.756	1	2	1
10.323	-149.929	1	2	1
10.3647	-151.142	1	2	1
10.4064	-152.345	1	2	1
10.448	-153.486	1	2	1
10.4897	-154.648	1	2	1
10.5314	-155.729	1	2	1
10.573	-156.86	1	2	1
10.6147	-157.839	1	2	1
10.6564	-159.113	1	2	1
10.698	-160.296	1	2	1
10.7397	-161.427	1	2	1
10.7814	-162.508	1	2	1
10.823	-163.629	1	2	1
10.8647	-164.699	1	2	1
10.9064	-165.708	1	2	1
10.948	-166.524	1	2	1
10.9897	-167.676	1	2	1
11.0314	-168.695	1	2	1
11.073	-169.745	1	2	1
11.1147	-170.785	1	2	1
11.1564	-171.804	1	2	1
11.198	-172.803	1	2	1
11.2397	-173.751	1	2	1
11.2814	-174.689	1	2	1
11.323	-175.505	1	2	1
11.3647	-176.606	1	2	1
11.4064	-177.523	1	2	1
11.448	-178.461	1	2	1
11.4897	-179.358	1	2	1
11.5314	-180.265	1	2	1
11.573	-181.152	1	2	1
11.6147	-181.937	1	2	1
11.6564	-182.987	1	2	1
11.698	-183.914	1	2	1
11.7397	-184.893	1	2	1
11.7814	-185.596	1	2	1
11.823	-187.064	1	2	1
11.8647	-188.145	1	2	1
11.9064	-189.256	1	2	1
11.948	-190.255	1	2	1
11.9897	-191.019	1	2	1
12.0314	-192.385	1	2	1
12.073	-193.558	1	2	1
12.1147	-194.75	1	2	1
12.1564	-195.902	1	2	1
12.198	-197.074	1	2	1
12.2397	-198.308	1	2	1
12.2814	-199.501	1	2	1
12.323	-200.785	1	2	1
12.3647	-202.243	1	2	1
12.4064	-203.405	1	2	1
12.448	-204.883	1	2	1
12.4897	-206.137	1	2	1
12.5314	-207.421	1	2	1
12.573	-208.838	1	2	1
12.6147	-209.847	1	2	1
12.6564	-211.702	1	2	1
12.698	-213.476	1	2	1
12.7397	-215.138	1	2	1
12.7814	-217.013	1	2	1
12.823	-218.593	1	2	1
12.8647	-220.561	1	2	1
12.9064	-222.701	1	2	1
12.948	-224.424	1	2	1
12.9897	-226.636	1	2	1
13.0314	-228.226	1	2	1
13.073	-231.111	1	2	1
13.1147	-234.088	1	2	1
13.1564	-236.412	1	2	1
13.198	-239.225	1	2	1
13.2397	-241.937	1	2	1
13.2814	-244.924	1	2	1
13.323	-247.92	1	2	1
13.3647	-251.193	1	2	1
13.4064	-254.628	1	2	1
13.448	-257.798	1	2	1
13.4897	-261.835	1	2	1
13.5314	-265.525	1	2	1
13.573	-269.429	1	2	1
13.6147	-273.66	1	2	1
13.6564	-277.88	1	2	1
13.698	-282.62	1	2	1
13.7397	-288.155	1	2	1
13.7814	-293.863	1	2	1
13.823	-298.828	1	2	1
13.8647	-304.526	1	2	1
13.9064	-310.561	1	2	1
13.948	-316.442	1	2	1
13.9897	-322.977	1	2	1
14.0314	-330.173	1	2	1
14.073	-337.074	1	2	1
14.1147	-347.431	1	2	1
14.1564	-356.381	1	2	1
14.198	-365.77	1	2	1
14.2397	-374.251	1	2	1
14.2814	-383.761	1	2	1
14.323	-393.486	1	2	1
14.3647	-403.639	1	2	1
14.4064	-413.976	1	2	1
14.448	-425.759	1	2	1
14.4897	-438.338	1	2	1
14.5314	-451.04	1	2	1
14.573	-464.088	1	2	1
14.6147	-430.234	1	2	1
14.6564	-493.619	1	2	1
14.698	-513.242	1	2	1
14.7397	-527.788	1	2	1
14.7814	-546.106	1	2	1
14.823	-563.466	1	2	1
14.8647	-578.369	1	2	1
14.9064	-600.092	1	2	1
14.948	-619.164	1	2	1
14.9897	-640.938	1	2	1
15.0314	-662.1	1	2	1
15.073	-682.426	1	2	1
15.1147	-705.81	1	2	1
15.1564	-728.593	1	2	1
15.198	-755.668	1	2	1
15.2397	-780.866	1	2	1
15.2814	-812.793	1	2	1
15.323	-848.328	1	2	1
15.3647	-883.853	1	2	1
15.4064	-921.05	1	2	1
15.448	-958.593	1	2	1
15.4897	-993.843	1	2	1
15.5314	-1033.47	1	2	1
15.573	-1076.48	1	2	1
15.6147	-1119.41	1	2	1
15.6564	-1163	1	2	1
15.698	-1207.01	1	2	1
15.7397	-1250.65	1	2	1
15.7814	-1305.68	1	2	1
15.823	-1360.24	1	2	1
15.8647	-1413.73	1	2	1
15.9064	-1464.65	1	2	1
15.948	-1513.28	1	2	1
15.9897	-1566.85	1	2	1
16.0244	-1612.92	1	2	1
19.7744	-8970.44	1	2	1
0.00389504	-6.41182	1	1	1
0.0108395	-6.9317	1	1	1
0.0177839	-7.32926	1	1	1
0.0247284	-7.70642	1	1	1
0.0608395	-9.42915	1	1	1
0.102506	-10.9276	1	1	1
0.144173	-12.3853	1	1	1
0.185839	-13.6799	1	1	1
0.227506	-14.791	1	1	1
0.269173	-15.7085	1	1	1
0.310839	-16.5545	1	1	1
1.79802	-21.0601	1	1	1
1.80219	-21.0601	1	1	1
1.80635	-21.0398	1	1	1
1.81052	-21.0703	1	1	1
1.81469	-21.0805	1	1	1
1.81885	-21.1213	1	1	1
1.82302	-21.1315	1	1	1
1.82719	-21.1519	1	1	1
1.83135	-21.1723	1	1	1
1.83552	-21.1723	1	1	1
1.86469	-21.3456	1	1	1
1.90635	-21.58	1	1	1
1.94802	-21.7533	1	1	1
1.98969	-21.4169	1	1	1
2.03135	-22.0489	1	1	1
2.07302	-22.2834	1	1	1
2.11469	-22.4057	1	1	1
2.15635	-22.5484	1	1	1
2.19802	-22.5382	1	1	1
2.23969	-22.7319	1	1	1
2.28135	-22.8644	1	1	1
2.32302	-23.0581	1	1	1
2.36469	-23.1498	1	1	1
2.40635	-23.3129	1	1	1
2.44802	-23.4964	1	1	1
2.48969	-23.6188	1	1	1
2.53135	-23.8124	1	1	1
2.57302	-23.945	1	1	1
2.61469	-24.0775	1	1	1
2.65635	-24.21	1	1	1
2.69802	-24.3527	1	1	1
2.73969	-24.5056	1	1	1
2.78135	-24.5872	1	1	1
2.82302	-24.7197	1	1	1
2.86469	-24.8828	1	1	1
2.90635	-25.0051	1	1	1
2.94802	-25.1682	1	1	1
2.98969	-25.1274	1	1	1
3.03135	-25.423	1	1	1
3.07302	-25.6269	1	1	1
3.11469	-25.7288	1	1	1
3.15635	-25.9531	1	1	1
3.19802	-26.1162	1	1	1
3.23969	-26.2793	1	1	1
3.28135	-26.4526	1	1	1
3.32302	-26.6055	1	1	1
3.36469	-26.7482	1	1	1
3.40635	-26.7992	1	1	1
3.44802	-27.0133	1	1	1
3.48969	-27.1764	1	1	1
3.53135	-27.3191	1	1	1
3.57302	-27.4822	1	1	1
3.61469	-27.6555	1	1	1
3.65635	-27.8084	1	1	1
3.69802	-27.9103	1	1	1
3.73969	-28.1549	1	1	1
3.78135	-28.318	1	1	1
3.82302	-28.42	1	1	1
3.86469	-28.6137	1	1	1
3.90635	-28.7971	1	1	1
3.94802	-28.9297	1	1	1
3.98969	-29.0826	1	1	1
4.03135	-29.2253	1	1	1
4.07302	-29.4393	1	1	1
4.11469	-29.5923	1	1	1
4.15635	-29.8063	1	1	1
4.19802	-29.9898	1	1	1
4.23969	-30.1529	1	1	1
4.28135	-30.3364	1	1	1
4.32302	-30.5403	1	1	1
4.36469	-30.7441	1	1	1
4.40635	-30.8869	1	1	1
4.44802	-31.0907	1	1	1
4.48969	-31.315	1	1	1
4.53135	-31.5291	1	1	1
4.57302	-31.7329	1	1	1
4.61469	-31.9062	1	1	1
4.65635	-32.1101	1	1	1
4.69802	-32.2936	1	1	1
4.73969	-32.4873	1	1	1
4.78135	-32.7319	1	1	1
4.82302	-32.8033	1	1	1
4.86469	-33.0275	1	1	1
4.90635	-33.4149	1	1	1
4.94802	-33.7207	1	1	1
4.98969	-34.0469	1	1	1
5.03135	-34.3833	1	1	1
5.07302	-34.7299	1	1	1
5.11469	-35.0561	1	1	1
5.15635	-35.4027	1	1	1
5.19802	-35.6983	1	1	1
5.23969	-35.9837	1	1	1
5.28135	-36.2895	1	1	1
5.32302	-36.5851	1	1	1
5.36469	-36.9521	1	1	1
5.40635	-37.2579	1	1	1
5.44802	-37.6045	1	1	1
5.48969	-37.9511	1	1	1
5.53135	-38.3486	1	1	1
5.57302	-38.6952	1	1	1
5.61469	-38.8991	1	1	1
5.65635	-39.2151	1	1	1
5.69802	-39.6228	1	1	1
5.73969	-39.9286	1	1	1
5.78135	-40.3058	1	1	1
5.82302	-40.6932	1	1	1
5.86469	-41.0601	1	1	1
5.90635	-41.4577	1	1	1
5.94802	-41.8654	1	1	1
5.98969	-42.3242	1	1	1
6.03135	-42.8135	1	1	1
6.07302	-43.16	1	1	1
6.11469	-43.5474	1	1	1
6.15635	-44.0571	1	1	1
6.19802	-44.5668	1	1	1
6.23969	-45.0561	1	1	1
6.28135	-45.5454	1	1	1
6.32302	-46.0143	1	1	1
6.36469	-46.5138	1	1	1
6.40635	-46.9725	1	1	1
6.44802	-47.4618	1	1	1
6.48969	-47.9307	1	1	1
6.53135	-48.4811	1	1	1
6.57302	-49.001	1	1	1
6.61469	-49.5107	1	1	1
6.65635	-50.0612	1	1	1
6.69802	-50.5708	1	1	1
6.73969	-50.9582	1	1	1
6.78135	-51.4781	1	1	1
6.82302	-52.0591	1	1	1
6.86469	-52.6198	1	1	1
6.90635	-53.1906	1	1	1
6.94802	-53.7819	1	1	1
6.98969	-54.3527	1	1	1
7.03135	-55.0051	1	1	1
7.07302	-55.7085	1	1	1
7.11469	-56.3812	1	1	1
7.15635	-57.0744	1	1	1
7.19802	-57.8186	1	1	1
7.23969	-58.5015	1	1	1
7.28135	-59.2253	1	1	1
7.32302	-59.9694	1	1	1
7.36469	-60.7339	1	1	1
7.40635	-61.4781	1	1	1
7.44802	-62.3038	1	1	1
7.48969	-63.1702	1	1	1
7.53135	-63.9857	1	1	1
7.57302	-64.8012	1	1	1
7.61469	-65.6575	1	1	1
7.65635	-66.4934	1	1	1
7.69802	-67.3598	1	1	1
7.73969	-68.2365	1	1	1
7.78135	-69.1641	1	1	1
7.82302	-70.0815	1	1	1
7.86469	-70.8155	1	1	1
7.90635	-71.8451	1	1	1
7.94802	-72.844	1	1	1
7.98969	-73.8634	1	1	1
8.03135	-74.9439	1	1	1
8.07302	-75.9939	1	1	1
8.11469	-77.0133	1	1	1
8.15635	-78.0734	1	1	1
8.19802	-79.1539	1	1	1
8.23969	-80.1733	1	1	1
8.28135	-81.2436	1	1	1
8.32302	-82.2936	1	1	1
8.36469	-83.3843	1	1	1
8.40635	-84.4648	1	1	1
8.44802	-85.5657	1	1	1
8.48969	-86.6157	1	1	1
8.53135	-87.7778	1	1	1
8.57302	-88.9195	1	1	1
8.61469	-90.1223	1	1	1
8.65635	-91.0907	1	1	1
8.69802	-92.3955	1	1	1
8.73969	-93.7411	1	1	1
8.78135	-95.2396	1	1	1
8.82302	-96.6565	1	1	1
8.86469	-98.1244	1	1	1
8.90635	-99.633	1	1	1
8.94802	-101.131	1	1	1
8.98969	-102.63	1	1	1
9.03135	-104.2	1	1	1
9.07302	-105.872	1	1	1
9.11469	-107.554	1	1	1
9.15635	-109.297	1	1	1
9.19802	-111.04	1	1	1
9.23969	-112.783	1	1	1
9.28135	-114.557	1	1	1
9.32302	-116.412	1	1	1
9.36469	-118.318	1	1	1
9.40635	-120.102	1	1	1
9.44802	-121.916	1	1	1
9.48969	-123.761	1	1	1
9.53135	-125.556	1	1	1
9.57302	-127.217	1	1	1
9.61469	-128.563	1	1	1
9.65635	-130.112	1	1	1
9.69802	-131.651	1	1	1
9.73969	-133.262	1	1	1
9.78135	-134.842	1	1	1
9.82302	-136.524	1	1	1
9.86469	-138.094	1	1	1
9.90635	-139.643	1	1	1
9.94802	-140.989	1	1	1
9.98969	-142.365	1	1	1
10.0314	-143.802	1	1	1
10.073	-145.189	1	1	1
10.1147	-146.769	1	1	1
10.1564	-148.084	1	1	1
10.198	-149.388	1	1	1
10.2397	-150.663	1	1	1
10.2814	-151.896	1	1	1
10.323	-153.16	1	1	1
10.3647	-154.434	1	1	1
10.4064	-155.719	1	1	1
10.448	-156.942	1	1	1
10.4897	-158.145	1	1	1
10.5314	-159.337	1	1	1
10.573	-160.581	1	1	1
10.6147	-161.794	1	1	1
10.6564	-163.14	1	1	1
10.698	-164.404	1	1	1
10.7397	-165.657	1	1	1
10.7814	-166.799	1	1	1
10.823	-168.094	1	1	1
10.8647	-169.286	1	1	1
10.9064	-170.51	1	1	1
10.948	-171.56	1	1	1
10.9897	-172.854	1	1	1
11.0314	-174.128	1	1	1
11.073	-175.464	1	1	1
11.1147	-176.789	1	1	1
11.1564	-178.084	1	1	1
11.198	-179.368	1	1	1
11.2397	-180.561	1	1	1
11.2814	-181.855	1	1	1
11.323	-183.129	1	1	1
11.3647	-184.414	1	1	1
11.4064	-185.729	1	1	1
11.448	-187.044	1	1	1
11.4897	-188.328	1	1	1
11.5314	-189.684	1	1	1
11.573	-190.775	1	1	1
11.6147	-191.916	1	1	1
11.6564	-193.282	1	1	1
11.698	-194.801	1	1	1
11.7397	-196.035	1	1	1
11.7814	-197.299	1	1	1
11.823	-199.123	1	1	1
11.8647	-200.663	1	1	1
11.9064	-202.192	1	1	1
11.948	-203.67	1	1	1
11.9897	-204.811	1	1	1
12.0314	-206.493	1	1	1
12.073	-208.043	1	1	1
12.1147	-209.613	1	1	1
12.1564	-211.193	1	1	1
12.198	-212.783	1	1	1
12.2397	-214.414	1	1	1
12.2814	-216.075	1	1	1
12.323	-217.635	1	1	1
12.3647	-219.633	1	1	1
12.4064	-221.539	1	1	1
12.448	-223.496	1	1	1
12.4897	-225.484	1	1	1
12.5314	-227.594	1	1	1
12.573	-229.776	1	1	1
12.6147	-231.427	1	1	1
12.6564	-234.006	1	1	1
12.698	-236.432	1	1	1
12.7397	-238.869	1	1	1
12.7814	-241.488	1	1	1
12.823	-244.149	1	1	1
12.8647	-246.972	1	1	1
12.9064	-249.98	1	1	1
12.948	-253.068	1	1	1
12.9897	-256.616	1	1	1
13.0314	-259.195	1	1	1
13.073	-263.394	1	1	1
13.1147	-267.238	1	1	1
13.1564	-271.335	1	1	1
13.198	-275.525	1	1	1
13.2397	-280.102	1	1	1
13.2814	-284.73	1	1	1
13.323	-290.02	1	1	1
13.3647	-295.199	1	1	1
13.4064	-300.408	1	1	1
13.448	-306.035	1	1	1
13.4897	-311.988	1	1	1
13.5314	-318.206	1	1	1
13.573	-324.546	1	1	1
13.6147	-331.641	1	1	1
13.6564	-338.512	1	1	1
13.698	-345.341	1	1	1
13.7397	-353.456	1	1	1
13.7814	-362.151	1	1	1
13.823	-370.785	1	1	1
13.8647	-380.194	1	1	1
13.9064	-389.409	1	1	1
13.948	-400.285	1	1	1
13.9897	-410.724	1	1	1
14.0314	-422.813	1	1	1
14.073	-433.435	1	1	1
14.1147	-447.176	1	1	1
14.1564	-460.377	1	1	1
14.198	-474.975	1	1	1
14.2397	-489.144	1	1	1
14.2814	-504.373	1	1	1
14.323	-520.153	1	1	1
14.3647	-537.197	1	1	1
14.4064	-555.331	1	1	1
14.448	-574.638	1	1	1
14.4897	-593.282	1	1	1
14.5314	-615.627	1	1	1
14.573	-637.778	1	1	1
16.7188	-8970.44	1	1	1
0.743695	0.904877	2	0	100000
1.07286	0.879467	2	0	100000
1.64049	0.837541	2	0	100000
1.98524	0.815451	2	0	100000
2.21451	0.801352	2	0	100000
2.74534	0.767336	2	0	100000
2.97695	0.751803	2	0	100000
3.63936	0.708811	2	0	100000
4.66126	0.644549	2	0	100000
5.16426	0.609836	2	0	100000
5.63826	0.578975	2	0	100000
6.083	0.550902	2	0	100000
6.73818	0.512746	2	0	100000
7.85925	0.45373	2	0	100000
8.62515	0.413238	2	0	100000
9.60181	0.358689	2	0	100000
9.93441	0.342541	2	0	100000
10.5879	0.312869	2	0	100000
10.9442	0.295328	2	0	100000
11.5989	0.26209	2	0	100000
11.9729	0.242049	2	0	100000
12.5923	0.209754	2	0	100000
13.0193	0.187336	2	0	100000
13.6574	0.156475	2	0	100000
14.0535	0.139959	2	0	100000
14.6145	0.119836	2	0	100000
16.7376	0.0665574	2	0	100000
17.8588	0.0483197	2	0	100000
18.7487	0.0367623	2	0	100000
19.0073	0.0338115	2	0	100000
19.6537	0.0263934	2	0	100000
20.6506	0.0169262	2	0	100000

## Sheet: tens_interpolation
		Datum / Zeit	Tension unten [hPa]	Tension oben [hPa]
m_bot	b_bot	2013-07-31 15:49:15	0.65	3.59
82.8	-3.43509e+06	2013-07-31 16:09:15	1.8	4.76
m_top	b_top	2013-07-31 15:53:59	0.921717	3.86644
84.24	-3.49483e+06	y = m*x+b
		AE unten [t]	AE oben [t]
		41227.2
			Brutto-Gewicht [g]	Netto-Gewicht [g]
-1.40314	58626.9	2013-08-23 17:58:52	382.99	12.72
		2013-08-24 10:54:53	382	11.73
-1.40314	58256.7	2013-08-24 06:49:00	382.24	11.9696
			AE unten
m_bot	b_bot	2012-11-12 09:52:24	595.08	28.48
-3.5343	146298	2012-11-15 10:52:20	584.33	17.73
m_top	b_top	2012-11-16 08:39:32	581.122	14.5216
-3.5343	145731	y = m*x+b

## Sheet: Tabelle1
2012-12-08 17:51:08	0	2012-12-08 17:51:08	0	3.33	5.86
2012-12-08 17:52:08	0.000694444		-41251.7	3.37	5.9
2012-12-08 17:53:08	0.00138889		-41251.7	3.42	5.94
2012-12-08 17:54:08	0.00208333		-41251.7	3.45	5.98
2012-12-08 17:55:08	0.00277778		-41251.7	3.52	6.04
2012-12-08 17:56:08	0.00347222		-41251.7	3.57	6.08
2012-12-08 17:57:08	0.00416667		-41251.7	3.62	6.13
2012-12-08 17:58:08	0.00486111		-41251.7	3.68	6.19
2012-12-08 17:59:08	0.00555556		-41251.7	3.72	6.24
2012-12-08 18:00:08	0.00625		-41251.7	3.79	6.29
2012-12-08 18:01:08	0.00694444	2012-12-08 18:01:08	0.00694444	3.84	6.33
2012-12-08 18:02:08	0.00763889		-41251.7	3.88	6.38
2012-12-08 18:03:08	0.00833333		-41251.7	3.92	6.42
2012-12-08 18:04:08	0.00902778		-41251.7	3.85	6.7
2012-12-08 18:05:08	0.00972222		-41251.7	3.48	6.02
2012-12-08 18:06:08	0.0104167		-41251.7	3.49	6.03
2012-12-08 18:07:08	0.0111111		-41251.7	3.66	6.19
2012-12-08 18:08:08	0.0118056		-41251.7	3.73	6.26
2012-12-08 18:09:08	0.0125		-41251.7	3.76	6.29
2012-12-08 18:10:08	0.0131944		-41251.7	3.82	6.36
2012-12-08 18:11:08	0.0138889	2012-12-08 18:11:08	0.0138889	3.88	6.41
2012-12-08 18:12:08	0.0145833		-41251.7	3.94	6.48
2012-12-08 18:13:08	0.0152778		-41251.7	4	6.52
2012-12-08 18:14:08	0.0159722		-41251.7	4.05	6.58
2012-12-08 18:15:08	0.0166667		-41251.7	4.11	6.63
2012-12-08 18:16:08	0.0173611		-41251.7	4.16	6.68
2012-12-08 18:17:08	0.0180556		-41251.7	4.2	6.71
2012-12-08 18:18:08	0.01875		-41251.7	4.24	6.76
2012-12-08 18:19:08	0.0194444		-41251.7	4.29	6.8
2012-12-08 18:20:08	0.0201389		-41251.7	4.32	6.84
2012-12-08 18:21:08	0.0208333	2012-12-08 18:21:08	0.0208333	4.37	6.88
2012-12-08 18:22:08	0.0215278		-41251.7	4.41	6.93
2012-12-08 18:23:08	0.0222222		-41251.7	4.45	6.96
2012-12-08 18:24:08	0.0229167		-41251.7	4.49	7.01
2012-12-08 18:25:08	0.0236111		-41251.7	4.53	7.04
2012-12-08 18:26:08	0.0243056		-41251.7	4.57	7.08
2012-12-08 18:27:08	0.025		-41251.7	4.61	7.11
2012-12-08 18:28:08	0.0256944		-41251.7	4.65	7.15
2012-12-08 18:29:08	0.0263889		-41251.7	4.69	7.19
2012-12-08 18:30:08	0.0270833		-41251.7	4.73	7.22
2012-12-08 18:31:08	0.0277778	2012-12-08 18:31:08	0.0277778	4.77	7.27
2012-12-08 18:32:08	0.0284722		-41251.7	4.8	7.29
2012-12-08 18:33:08	0.0291667		-41251.7	4.84	7.33
2012-12-08 18:34:08	0.0298611		-41251.7	4.89	7.38
2012-12-08 18:35:08	0.0305556		-41251.7	4.92	7.42
2012-12-08 18:36:08	0.03125		-41251.7	4.95	7.45
2012-12-08 18:37:08	0.0319444		-41251.7	5	7.49
2012-12-08 18:38:08	0.0326389		-41251.7	5.03	7.53
2012-12-08 18:39:08	0.0333333	2012-12-08 18:39:08	0.0333333	5.07	7.56
2012-12-08 18:40:08	0.0340278		-41251.7	5.11	7.61
2012-12-08 18:41:08	0.0347222		-41251.7	5.15	7.64
2012-12-08 18:42:08	0.0354167		-41251.7	5.2	7.68
2012-12-08 18:43:08	0.0361111		-41251.7	5.22	7.72
2012-12-08 18:44:08	0.0368056		-41251.7	5.25	7.75
2012-12-08 18:45:08	0.0375		-41251.7	5.3	7.8
2012-12-08 18:46:08	0.0381944		-41251.7	5.32	7.81
2012-12-08 18:47:08	0.0388889		-41251.7	5.35	7.84
2012-12-08 18:48:08	0.0395833		-41251.7	5.39	7.88
2012-12-08 18:49:08	0.0402778		-41251.7	5.43	7.92
2012-12-08 18:50:08	0.0409722		-41251.7	5.46	7.96
2012-12-08 18:51:08	0.0416667	2012-12-08 18:51:08	0.0416667	5.49	7.98
2012-12-08 19:01:08	0.0486111		-41251.7	5.81	8.3
2012-12-08 19:11:08	0.0555556		-41251.7	6.15	8.64
2012-12-08 19:21:08	0.0625		-41251.7	6.45	8.94
2012-12-08 19:31:08	0.0694444		-41251.7	6.75	9.25
2012-12-08 19:41:08	0.0763889		-41251.7	7.05	9.54
2012-12-08 19:51:08	0.0833333	2012-12-08 19:51:08	0.0833333	7.3	9.79
2012-12-08 20:01:08	0.0902778		-41251.7	7.6	10.08
2012-12-08 20:11:08	0.0972222		-41251.7	7.85	10.36
2012-12-08 20:21:08	0.104167		-41251.7	8	10.49
2012-12-08 20:31:08	0.111111		-41251.7	8.23	10.72
2012-12-08 20:41:08	0.118056		-41251.7	8.47	10.96
2012-12-08 20:51:08	0.125	2012-12-08 20:51:08	0.125	8.74	11.23
2012-12-08 21:01:08	0.131944		-41251.7	8.97	11.47
2012-12-08 21:11:08	0.138889		-41251.7	9.2	11.7
2012-12-08 21:21:08	0.145833		-41251.7	9.42	11.92
2012-12-08 21:31:08	0.152778		-41251.7	9.66	12.15
2012-12-08 21:41:08	0.159722		-41251.7	9.88	12.38
2012-12-08 21:51:08	0.166667	2012-12-08 21:51:08	0.166667	10.06	12.54
2012-12-08 22:01:08	0.173611		-41251.7	10.28	12.78
2012-12-08 22:11:08	0.180556		-41251.7	10.51	13.01
2012-12-08 22:21:08	0.1875		-41251.7	10.71	13.22
2012-12-08 22:31:08	0.194444		-41251.7	10.93	13.42
2012-12-08 22:41:08	0.201389		-41251.7	11.07	13.57
2012-12-08 22:51:08	0.208333	2012-12-08 22:51:08	0.208333	11.25	13.75
2012-12-08 23:01:08	0.215278		-41251.7	11.45	13.95
2012-12-08 23:11:08	0.222222		-41251.7	11.63	14.14
2012-12-08 23:21:08	0.229167		-41251.7	11.82	14.32
2012-12-08 23:31:08	0.236111		-41251.7	12.01	14.51
2012-12-08 23:41:08	0.243056		-41251.7	12.17	14.66
2012-12-08 23:51:08	0.25	2012-12-08 23:51:08	0.25	12.36	14.85
2012-12-09 00:01:08	0.256944		-41251.7	12.43	14.93
2012-12-09 00:11:08	0.263889		-41251.7	12.6	15.1
2012-12-09 00:21:08	0.270833		-41251.7	12.77	15.27
2012-12-09 00:31:08	0.277778		-41251.7	12.92	15.41
2012-12-09 00:41:08	0.284722		-41251.7	13.06	15.55
2012-12-09 00:51:08	0.291667	2012-12-09 00:51:08	0.291667	13.21	15.7
2012-12-09 01:01:08	0.298611		-41251.7	13.34	15.83
2012-12-09 01:11:08	0.305556		-41251.7	13.5	15.99
2012-12-09 01:21:08	0.3125		-41251.7	13.66	16.16
2012-12-09 01:31:08	0.319444		-41251.7	13.75	16.24
2012-12-09 01:41:08	0.326389		-41251.7	13.91	16.39
2012-12-09 01:51:08	0.333333	2012-12-09 01:51:08	0.333333	14.02	16.52
2012-12-10 13:09:40	1.80454	2012-12-10 13:09:40	1.80454	18.12	20.61
2012-12-10 13:10:40	1.80524		-41251.7	18.15	20.65
2012-12-10 13:11:40	1.80593		-41251.7	18.15	20.64
2012-12-10 13:12:40	1.80662		-41251.7	18.18	20.66
2012-12-10 13:13:40	1.80732		-41251.7	18.18	20.66
2012-12-10 13:14:40	1.80801		-41251.7	18.15	20.63
2012-12-10 13:15:40	1.80871	2012-12-10 13:15:40	1.80871	18.17	20.66
2012-12-10 13:16:40	1.8094		-41251.7	18.16	20.64
2012-12-10 13:17:40	1.8101		-41251.7	18.17	20.65
2012-12-10 13:18:40	1.81079		-41251.7	18.17	20.66
2012-12-10 13:19:40	1.81149		-41251.7	18.17	20.65
2012-12-10 13:20:40	1.81218		-41251.7	18.17	20.65
2012-12-10 13:21:40	1.81287	2012-12-10 13:21:40	1.81287	18.16	20.65
2012-12-10 13:22:40	1.81357		-41251.7	18.17	20.65
2012-12-10 13:23:40	1.81426		-41251.7	18.19	20.68
2012-12-10 13:24:40	1.81496		-41251.7	18.15	20.64
2012-12-10 13:25:40	1.81565		-41251.7	18.19	20.66
2012-12-10 13:26:40	1.81635		-41251.7	18.16	20.64
2012-12-10 13:27:40	1.81704	2012-12-10 13:27:40	1.81704	18.19	20.67
2012-12-10 13:28:40	1.81774		-41251.7	18.19	20.67
2012-12-10 13:29:40	1.81843		-41251.7	18.2	20.69
2012-12-10 13:30:40	1.81912		-41251.7	18.19	20.67
2012-12-10 13:31:40	1.81982		-41251.7	18.19	20.69
2012-12-10 13:32:40	1.82051		-41251.7	18.19	20.67
2012-12-10 13:33:40	1.82121	2012-12-10 13:33:40	1.82121	18.21	20.69
2012-12-10 13:34:40	1.8219		-41251.7	18.16	20.64
2012-12-10 13:35:40	1.8226		-41251.7	18.18	20.66
2012-12-10 13:36:40	1.82329		-41251.7	18.19	20.68
2012-12-10 13:37:40	1.82399		-41251.7	18.2	20.7
2012-12-10 13:38:40	1.82468		-41251.7	18.22	20.71
2012-12-10 13:39:40	1.82537	2012-12-10 13:39:40	1.82537	18.23	20.72
2012-12-10 13:40:40	1.82607		-41251.7	18.21	20.68
2012-12-10 13:41:40	1.82676		-41251.7	18.21	20.7
2012-12-10 13:42:40	1.82746		-41251.7	18.24	20.72
2012-12-10 13:43:40	1.82815		-41251.7	18.21	20.7
2012-12-10 13:44:40	1.82885		-41251.7	18.23	20.7
2012-12-10 13:45:40	1.82954	2012-12-10 13:45:40	1.82954	18.24	20.7
2012-12-10 13:46:40	1.83024		-41251.7	18.19	20.69
2012-12-10 13:47:40	1.83093		-41251.7	18.21	20.7
2012-12-10 13:48:40	1.83162		-41251.7	18.23	20.73
2012-12-10 13:49:40	1.83232		-41251.7	18.25	20.74
2012-12-10 13:50:40	1.83301		-41251.7	18.26	20.72
2012-12-10 13:51:40	1.83371	2012-12-10 13:51:40	1.83371	18.24	20.73
2012-12-10 13:52:40	1.8344		-41251.7	18.25	20.74
2012-12-10 13:53:40	1.8351		-41251.7	18.26	20.74
2012-12-10 13:54:40	1.83579		-41251.7	18.27	20.75
2012-12-10 13:55:40	1.83649		-41251.7	18.28	20.77
2012-12-10 13:56:40	1.83718		-41251.7	18.25	20.75
2012-12-10 13:57:40	1.83787	2012-12-10 13:57:40	1.83787	18.28	20.77
2012-12-10 13:58:40	1.83857		-41251.7	18.29	20.78
2012-12-10 13:59:40	1.83926		-41251.7	18.3	20.77
2012-12-10 14:00:40	1.83996		-41251.7	18.33	20.77
2012-12-10 14:01:40	1.84065		-41251.7	18.29	20.78
2012-12-10 14:02:40	1.84135		-41251.7	18.27	20.77
2012-12-10 14:03:40	1.84204	2012-12-10 14:03:40	1.84204	18.3	20.8
2012-12-10 14:04:40	1.84274		-41251.7	18.29	20.75
2012-12-10 14:05:40	1.84343		-41251.7	18.3	20.78
2012-12-10 14:06:40	1.84412		-41251.7	18.31	20.77
2012-12-10 14:07:40	1.84482		-41251.7	18.31	20.8
2012-12-10 14:08:40	1.84551		-41251.7	18.3	20.79
2012-12-10 14:18:40	1.85246	2012-12-10 14:18:40	1.85246	18.34	20.83
2012-12-10 14:28:40	1.8594		-41251.7	18.37	20.85
2012-12-10 14:38:40	1.86635		-41251.7	18.43	20.89
2012-12-10 14:48:40	1.87329		-41251.7	18.45	20.94
2012-12-10 14:58:40	1.88024		-41251.7	18.45	20.94
2012-12-10 15:08:40	1.88718		-41251.7	18.5	20.97
2012-12-10 15:18:40	1.89412	2012-12-10 15:18:40	1.89412	18.55	21.04
2012-12-10 15:28:40	1.90107		-41251.7	18.57	21.05
2012-12-10 15:38:40	1.90801		-41251.7	18.65	21.11
2012-12-10 15:48:40	1.91496		-41251.7	18.7	21.17
2012-12-10 15:58:40	1.9219		-41251.7	18.7	21.18
2012-12-10 16:08:40	1.92885		-41251.7	18.76	21.25
2012-12-10 16:18:40	1.93579	2012-12-10 16:18:40	1.93579	18.72	21.19
2012-12-10 16:28:40	1.94274		-41251.7	18.77	21.25
2012-12-10 16:38:40	1.94968		-41251.7	18.79	21.27
2012-12-10 16:48:40	1.95662		-41251.7	18.88	21.34
2012-12-10 16:58:40	1.96357		-41251.7	18.86	21.36
2012-12-10 17:08:40	1.97051		-41251.7	18.89	21.38
2012-12-10 17:18:40	1.97746	2012-12-10 17:18:40	1.97746	18.97	21.44
2012-12-10 17:28:40	1.9844		-41251.7	18.98	21.47
2012-12-10 17:38:40	1.99135		-41251.7	19.04	21.52
2012-12-10 17:48:40	1.99829		-41251.7	18.53	21.01
2012-12-10 17:58:40	2.00524		-41251.7	18.76	21.22
2012-12-10 18:08:40	2.01218		-41251.7	18.93	21.41
2012-12-10 18:18:40	2.01912	2012-12-10 18:18:40	2.01912	19.02	21.49
2012-12-10 18:28:40	2.02607		-41251.7	19.08	21.56
2012-12-10 18:38:40	2.03301		-41251.7	19.12	21.59
2012-12-10 18:48:40	2.03996		-41251.7	19.15	21.63
2012-12-10 18:58:40	2.0469		-41251.7	19.17	21.65
2012-12-10 19:08:40	2.05385		-41251.7	19.22	21.7
2012-12-10 19:18:40	2.06079	2012-12-10 19:18:40	2.06079	19.24	21.72
2012-12-10 19:28:40	2.06774		-41251.7	19.3	21.77
2012-12-10 19:38:40	2.07468		-41251.7	19.35	21.83
2012-12-10 19:48:40	2.08162		-41251.7	19.38	21.86
2012-12-10 19:58:40	2.08857		-41251.7	19.39	21.87
2012-12-10 20:08:40	2.09551		-41251.7	19.44	21.92
2012-12-10 20:18:40	2.10246	2012-12-10 20:18:40	2.10246	19.47	21.95
2012-12-10 20:28:40	2.1094		-41251.7	19.43	21.9
2012-12-10 20:38:40	2.11635		-41251.7	19.49	21.96
2012-12-10 20:48:40	2.12329		-41251.7	19.53	21.98
2012-12-10 20:58:40	2.13024		-41251.7	19.58	22.04
2012-12-10 21:08:40	2.13718		-41251.7	19.44	21.92
2012-12-10 21:18:40	2.14412	2012-12-10 21:18:40	2.14412	19.5	21.96
2012-12-10 21:28:40	2.15107		-41251.7	19.59	22.06
2012-12-10 21:38:40	2.15801		-41251.7	19.63	22.11
2012-12-10 21:48:40	2.16496		-41251.7	19.65	22.12
2012-12-10 21:58:40	2.1719		-41251.7	19.7	22.17
2012-12-10 22:08:40	2.17885		-41251.7	19.7	22.18
2012-12-10 22:18:40	2.18579	2012-12-10 22:18:40	2.18579	19.75	22.22
2012-12-10 22:28:40	2.19274		-41251.7	19.77	22.22
2012-12-10 22:38:40	2.19968		-41251.7	19.64	22.11
2012-12-10 22:48:40	2.20662		-41251.7	19.64	22.11
2012-12-10 22:58:40	2.21357		-41251.7	19.69	22.16
2012-12-10 23:08:40	2.22051		-41251.7	19.78	22.25
2012-12-10 23:18:40	2.22746	2012-12-10 23:18:40	2.22746	19.62	22.11
2012-12-10 23:28:40	2.2344		-41251.7	19.72	22.2
2012-12-10 23:38:40	2.24135		-41251.7	19.77	22.25
2012-12-10 23:48:40	2.24829		-41251.7	19.82	22.3
2012-12-10 23:58:40	2.25524		-41251.7	19.79	22.26
2012-12-11 00:08:40	2.26218		-41251.7	19.85	22.34
2012-12-11 00:18:40	2.26912		-41251.7	19.89	22.36
2012-12-11 00:28:40	2.27607		-41251.7	19.93	22.41
2012-12-11 00:38:40	2.28301		-41251.7	19.83	22.3
2012-12-11 00:48:40	2.28996		-41251.7	19.97	22.43
2012-12-11 00:58:40	2.2969		-41251.7	20.02	22.49
2012-12-11 01:08:40	2.30385		-41251.7	20.06	22.54
2012-12-11 01:18:40	2.31079		-41251.7	20.06	22.53
2012-12-11 01:28:40	2.31774		-41251.7	20.07	22.55
2012-12-11 01:38:40	2.32468		-41251.7	20.1	22.58
2012-12-11 01:48:40	2.33162		-41251.7	20.14	22.62
2012-12-11 01:58:40	2.33857		-41251.7	20.19	22.66
2012-12-11 02:08:40	2.34551		-41251.7	20.23	22.68
2012-12-11 02:18:40	2.35246		-41251.7	20.23	22.69
2012-12-11 02:28:40	2.3594		-41251.7	20.26	22.73
2012-12-11 02:38:40	2.36635		-41251.7	20.22	22.7
2012-12-11 02:48:40	2.37329		-41251.7	20.24	22.71
2012-12-11 02:58:40	2.38024		-41251.7	20.29	22.76
2012-12-11 03:08:40	2.38718		-41251.7	20.34	22.8
2012-12-11 03:18:40	2.39412		-41251.7	20.36	22.82
2012-12-11 03:28:40	2.40107		-41251.7	20.42	22.89
2012-12-11 03:38:40	2.40801		-41251.7	20.42	22.9
2012-12-11 03:48:40	2.41496		-41251.7	20.41	22.87
2012-12-11 03:58:40	2.4219		-41251.7	20.45	22.94
2012-12-11 04:08:40	2.42885		-41251.7	20.48	22.97
2012-12-11 04:18:40	2.43579		-41251.7	20.46	22.94
2012-12-11 04:28:40	2.44274		-41251.7	20.51	22.99
2012-12-11 04:38:40	2.44968		-41251.7	20.54	23.02
2012-12-11 04:48:40	2.45662		-41251.7	20.58	23.05
2012-12-11 04:58:40	2.46357		-41251.7	20.5	22.98
2012-12-11 05:08:40	2.47051		-41251.7	20.61	23.06
2012-12-11 05:18:40	2.47746		-41251.7	20.62	23.08
2012-12-11 05:28:40	2.4844		-41251.7	20.65	23.11
2012-12-11 05:38:40	2.49135		-41251.7	20.69	23.16
2012-12-11 05:48:40	2.49829		-41251.7	20.69	23.17
2012-12-11 05:58:40	2.50524		-41251.7	20.75	23.2
2012-12-11 06:08:40	2.51218		-41251.7	20.65	23.2
2012-12-11 06:18:40	2.51912		-41251.7	20.81	23.27
2012-12-11 06:28:40	2.52607		-41251.7	20.82	23.24
2012-12-11 06:38:40	2.53301		-41251.7	20.88	23.35
2012-12-11 06:48:40	2.53996		-41251.7	20.89	23.36
2012-12-11 06:58:40	2.5469		-41251.7	20.9	23.39
2012-12-11 07:08:40	2.55385		-41251.7	20.93	23.41
2012-12-11 07:18:40	2.56079		-41251.7	20.96	23.43
2012-12-11 07:28:40	2.56774		-41251.7	21.02	23.48
2012-12-11 07:38:40	2.57468		-41251.7	21	23.44
2012-12-11 07:48:40	2.58162		-41251.7	21.01	23.49
2012-12-11 07:58:40	2.58857		-41251.7	21.06	23.53
2012-12-11 08:08:40	2.59551		-41251.7	21.09	23.54
2012-12-11 08:18:40	2.60246		-41251.7	21.12	23.58
2012-12-11 08:28:40	2.6094		-41251.7	21.16	23.6
2012-12-11 08:38:40	2.61635		-41251.7	21.12	23.59
2012-12-11 08:48:40	2.62329		-41251.7	21.15	23.62
2012-12-11 08:58:40	2.63024		-41251.7	21.17	23.65
2012-12-11 09:08:40	2.63718		-41251.7	21.21	23.67
2012-12-11 09:18:40	2.64412		-41251.7	21.18	23.65
2012-12-11 09:28:40	2.65107		-41251.7	21.23	23.7
2012-12-11 09:38:40	2.65801		-41251.7	21.3	23.73
2012-12-11 09:48:40	2.66496		-41251.7	21.29	23.75
2012-12-11 09:58:40	2.6719		-41251.7	21.3	23.77
2012-12-11 10:08:40	2.67885		-41251.7	21.35	23.81
2012-12-11 10:18:40	2.68579		-41251.7	21.36	23.82
2012-12-11 10:28:40	2.69274		-41251.7	21.38	23.85
2012-12-11 10:38:40	2.69968		-41251.7	21.39	23.85
2012-12-11 10:48:40	2.70662		-41251.7	21.42	23.89
2012-12-11 10:58:40	2.71357		-41251.7	21.46	23.93
2012-12-11 11:08:40	2.72051		-41251.7	21.46	23.92
2012-12-11 11:18:40	2.72746		-41251.7	21.52	23.99
2012-12-11 11:28:40	2.7344		-41251.7	21.51	23.96
2012-12-11 11:38:40	2.74135		-41251.7	21.55	24.01
2012-12-11 11:48:40	2.74829		-41251.7	21.59	24.04
2012-12-11 11:58:40	2.75524		-41251.7	21.07	23.53
2012-12-11 12:08:40	2.76218		-41251.7	21.3	23.75
2012-12-11 12:18:40	2.76912		-41251.7	21.52	23.93
2012-12-11 12:28:40	2.77607		-41251.7	21.54	24
2012-12-11 12:38:40	2.78301		-41251.7	21.64	24.08
2012-12-11 12:48:40	2.78996		-41251.7	21.68	24.12
2012-12-11 12:58:40	2.7969		-41251.7	21.72	24.17
2012-12-11 13:08:40	2.80385		-41251.7	21.64	24.06
2012-12-11 13:18:40	2.81079		-41251.7	21.73	24.19
2012-12-11 13:28:40	2.81774		-41251.7	21.75	24.2
2012-12-11 13:38:40	2.82468		-41251.7	21.76	24.2
2012-12-11 13:48:40	2.83162		-41251.7	21.8	24.25
2012-12-11 13:58:40	2.83857		-41251.7	21.81	24.27
2012-12-11 14:08:40	2.84551		-41251.7	21.87	24.32
2012-12-11 14:18:40	2.85246		-41251.7	21.9	24.33
2012-12-11 14:28:40	2.8594		-41251.7	21.92	24.37
2012-12-11 14:38:40	2.86635		-41251.7	21.94	24.38
2012-12-11 14:48:40	2.87329		-41251.7	21.97	24.41
2012-12-11 14:58:40	2.88024		-41251.7	21.99	24.44
2012-12-11 15:08:40	2.88718		-41251.7	21.98	24.42
2012-12-11 15:18:40	2.89412		-41251.7	22	24.46
2012-12-11 15:28:40	2.90107		-41251.7	22.03	24.47
2012-12-11 15:38:40	2.90801		-41251.7	22.03	24.47
2012-12-11 15:48:40	2.91496		-41251.7	22.08	24.53
2012-12-11 15:58:40	2.9219		-41251.7	22.11	24.54
2012-12-11 16:08:40	2.92885		-41251.7	22.12	24.56
2012-12-11 16:18:40	2.93579		-41251.7	22.14	24.57
2012-12-11 16:28:40	2.94274		-41251.7	22.19	24.63
2012-12-11 16:38:40	2.94968		-41251.7	22.22	24.65
2012-12-11 16:48:40	2.95662		-41251.7	22.24	24.69
2012-12-11 16:58:40	2.96357		-41251.7	22.21	24.66
2012-12-11 17:08:40	2.97051		-41251.7	22.27	24.73
2012-12-11 17:18:40	2.97746		-41251.7	21.75	24.2
2012-12-11 17:28:40	2.9844		-41251.7	21.88	24.35
2012-12-11 17:38:40	2.99135		-41251.7	22.02	24.49
2012-12-11 17:48:40	2.99829		-41251.7	22.2	24.65
2012-12-11 17:58:40	3.00524		-41251.7	22.31	24.75
2012-12-11 18:08:40	3.01218		-41251.7	22.31	24.78
2012-12-11 18:18:40	3.01912		-41251.7	22.35	24.8
2012-12-11 18:28:40	3.02607		-41251.7	22.41	24.85
2012-12-11 18:38:40	3.03301		-41251.7	22.45	24.89
2012-12-11 18:48:40	3.03996		-41251.7	22.49	24.94
2012-12-11 18:58:40	3.0469		-41251.7	22.54	24.97
2012-12-11 19:08:40	3.05385		-41251.7	22.53	24.96
2012-12-11 19:18:40	3.06079		-41251.7	22.57	25.01
2012-12-11 19:28:40	3.06774		-41251.7	22.62	25.05
2012-12-11 19:38:40	3.07468		-41251.7	22.66	25.09
2012-12-11 19:48:40	3.08162		-41251.7	22.7	25.14
2012-12-11 19:58:40	3.08857		-41251.7	22.7	25.14
2012-12-11 20:08:40	3.09551		-41251.7	22.75	25.19
2012-12-11 20:18:40	3.10246		-41251.7	22.78	25.22
2012-12-11 20:28:40	3.1094		-41251.7	22.8	25.24
2012-12-11 20:38:40	3.11635		-41251.7	22.81	25.26
2012-12-11 20:48:40	3.12329		-41251.7	22.8	25.24
2012-12-11 20:58:40	3.13024		-41251.7	22.87	25.29
2012-12-11 21:08:40	3.13718		-41251.7	22.91	25.35
2012-12-11 21:18:40	3.14412		-41251.7	22.93	25.37
2012-12-11 21:28:40	3.15107		-41251.7	22.98	25.4
2012-12-11 21:38:40	3.15801		-41251.7	22.99	25.42
2012-12-11 21:48:40	3.16496		-41251.7	23.03	25.46
2012-12-11 21:58:40	3.1719		-41251.7	23.08	25.52
2012-12-11 22:08:40	3.17885		-41251.7	23.09	25.53
2012-12-11 22:18:40	3.18579		-41251.7	23.09	25.53
2012-12-11 22:28:40	3.19274		-41251.7	23.1	25.54
2012-12-11 22:38:40	3.19968		-41251.7	23.16	25.59
2012-12-11 22:48:40	3.20662		-41251.7	23.19	25.62
2012-12-11 22:58:40	3.21357		-41251.7	23.18	25.62
2012-12-11 23:08:40	3.22051		-41251.7	23.23	25.66
2012-12-11 23:18:40	3.22746		-41251.7	23.26	25.7
2012-12-11 23:28:40	3.2344		-41251.7	23.29	25.73
2012-12-11 23:38:40	3.24135		-41251.7	23.32	25.75
2012-12-11 23:48:40	3.24829		-41251.7	23.34	25.78
2012-12-11 23:58:40	3.25524		-41251.7	23.38	25.82
2012-12-12 00:08:40	3.26218		-41251.7	23.44	25.85
2012-12-12 00:18:40	3.26912		-41251.7	23.43	25.88
2012-12-12 00:28:40	3.27607		-41251.7	23.47	25.9
2012-12-12 00:38:40	3.28301		-41251.7	23.5	25.93
2012-12-12 00:48:40	3.28996		-41251.7	23.51	25.95
2012-12-12 00:58:40	3.2969		-41251.7	23.58	26.01
2012-12-12 01:08:40	3.30385		-41251.7	23.58	26.02
2012-12-12 01:18:40	3.31079		-41251.7	23.58	26.02
2012-12-12 01:28:40	3.31774		-41251.7	23.61	26.05
2012-12-12 01:38:40	3.32468		-41251.7	23.65	26.07
2012-12-12 01:48:40	3.33162		-41251.7	23.67	26.1
2012-12-12 01:58:40	3.33857		-41251.7	23.7	26.12
2012-12-12 02:08:40	3.34551		-41251.7	23.73	26.15
2012-12-12 02:18:40	3.35246		-41251.7	23.74	26.18
2012-12-12 02:28:40	3.3594		-41251.7	23.76	26.19
2012-12-12 02:38:40	3.36635		-41251.7	23.8	26.23
2012-12-12 02:48:40	3.37329		-41251.7	23.81	26.24
2012-12-12 02:58:40	3.38024		-41251.7	23.87	26.3
2012-12-12 03:08:40	3.38718		-41251.7	23.78	26.21
2012-12-12 03:18:40	3.39412		-41251.7	23.8	26.23
2012-12-12 03:28:40	3.40107		-41251.7	23.8	26.23
2012-12-12 03:38:40	3.40801		-41251.7	23.88	26.32
2012-12-12 03:48:40	3.41496		-41251.7	23.86	26.29
2012-12-12 03:58:40	3.4219		-41251.7	23.92	26.35
2012-12-12 04:08:40	3.42885		-41251.7	23.95	26.38
2012-12-12 04:18:40	3.43579		-41251.7	24	26.43
2012-12-12 04:28:40	3.44274		-41251.7	24.02	26.45
2012-12-12 04:38:40	3.44968		-41251.7	24.04	26.47
2012-12-12 04:48:40	3.45662		-41251.7	24.07	26.5
2012-12-12 04:58:40	3.46357		-41251.7	24.08	26.52
2012-12-12 05:08:40	3.47051		-41251.7	24.11	26.55
2012-12-12 05:18:40	3.47746		-41251.7	24.15	26.59
2012-12-12 05:28:40	3.4844		-41251.7	24.18	26.61
2012-12-12 05:38:40	3.49135		-41251.7	24.19	26.63
2012-12-12 05:48:40	3.49829		-41251.7	24.23	26.66
2012-12-12 05:58:40	3.50524		-41251.7	24.27	26.7
2012-12-12 06:08:40	3.51218		-41251.7	24.28	26.71
2012-12-12 06:18:40	3.51912		-41251.7	24.34	26.76
2012-12-12 06:28:40	3.52607		-41251.7	24.34	26.76
2012-12-12 06:38:40	3.53301		-41251.7	24.35	26.78
2012-12-12 06:48:40	3.53996		-41251.7	24.38	26.8
2012-12-12 06:58:40	3.5469		-41251.7	24.42	26.84
2012-12-12 07:08:40	3.55385		-41251.7	24.45	26.87
2012-12-12 07:18:40	3.56079		-41251.7	24.47	26.91
2012-12-12 07:28:40	3.56774		-41251.7	24.49	26.92
2012-12-12 07:38:40	3.57468		-41251.7	24.55	26.96
2012-12-12 07:48:40	3.58162		-41251.7	24.54	26.96
2012-12-12 07:58:40	3.58857		-41251.7	24.58	27.01
2012-12-12 08:08:40	3.59551		-41251.7	24.61	27.05
2012-12-12 08:18:40	3.60246		-41251.7	24.64	27.06
2012-12-12 08:28:40	3.6094		-41251.7	24.62	27.05
2012-12-12 08:38:40	3.61635		-41251.7	24.67	27.1
2012-12-12 08:48:40	3.62329		-41251.7	24.7	27.13
2012-12-12 08:58:40	3.63024		-41251.7	24.74	27.17
2012-12-12 09:08:40	3.63718		-41251.7	24.77	27.2
2012-12-12 09:18:40	3.64412		-41251.7	24.79	27.22
2012-12-12 09:28:40	3.65107		-41251.7	24.63	27.11
2012-12-12 09:38:40	3.65801		-41251.7	24.77	27.23
2012-12-12 09:48:40	3.66496		-41251.7	24.83	27.28
2012-12-12 09:58:40	3.6719		-41251.7	24.88	27.33
2012-12-12 10:08:40	3.67885		-41251.7	24.88	27.34
2012-12-12 10:18:40	3.68579		-41251.7	24.89	27.35
2012-12-12 10:28:40	3.69274		-41251.7	24.91	27.37
2012-12-12 10:38:40	3.69968		-41251.7	24.95	27.41
2012-12-12 10:48:40	3.70662		-41251.7	24.94	27.38
2012-12-12 10:58:40	3.71357		-41251.7	25	27.46
2012-12-12 11:08:40	3.72051		-41251.7	25.05	27.49
2012-12-12 11:18:40	3.72746		-41251.7	25.05	27.52
2012-12-12 11:28:40	3.7344		-41251.7	25.12	27.57
2012-12-12 11:38:40	3.74135		-41251.7	25.12	27.58
2012-12-12 11:48:40	3.74829		-41251.7	25.17	27.62
2012-12-12 11:58:40	3.75524		-41251.7	25.19	27.65
2012-12-12 12:08:40	3.76218		-41251.7	25.2	27.65
2012-12-12 12:18:40	3.76912		-41251.7	25.23	27.68
2012-12-12 12:28:40	3.77607		-41251.7	25.26	27.71
2012-12-12 12:38:40	3.78301		-41251.7	25.31	27.76
2012-12-12 12:48:40	3.78996		-41251.7	25.33	27.78
2012-12-12 12:58:40	3.7969		-41251.7	25.24	27.7
2012-12-12 13:08:40	3.80385		-41251.7	25.27	27.71
2012-12-12 13:18:40	3.81079		-41251.7	25.31	27.77
2012-12-12 13:28:40	3.81774		-41251.7	25.37	27.81
2012-12-12 13:38:40	3.82468		-41251.7	25.39	27.84
2012-12-12 13:48:40	3.83162		-41251.7	25.43	27.88
2012-12-12 13:58:40	3.83857		-41251.7	25.48	27.93
2012-12-12 14:08:40	3.84551		-41251.7	25.51	27.95
2012-12-12 14:18:40	3.85246		-41251.7	25.52	27.96
2012-12-12 14:28:40	3.8594		-41251.7	25.56	28
2012-12-12 14:38:40	3.86635		-41251.7	25.59	28.02
2012-12-12 14:48:40	3.87329		-41251.7	25.62	28.07
2012-12-12 14:58:40	3.88024		-41251.7	25.64	28.08
2012-12-12 15:08:40	3.88718		-41251.7	25.64	28.1
2012-12-12 15:18:40	3.89412		-41251.7	25.68	28.13
2012-12-12 15:28:40	3.90107		-41251.7	25.74	28.17
2012-12-12 15:38:40	3.90801		-41251.7	25.76	28.21
2012-12-12 15:48:40	3.91496		-41251.7	25.8	28.25
2012-12-12 15:58:40	3.9219		-41251.7	25.85	28.27
2012-12-12 16:08:40	3.92885		-41251.7	25.85	28.3
2012-12-12 16:18:40	3.93579		-41251.7	25.87	28.32
2012-12-12 16:28:40	3.94274		-41251.7	25.88	28.32
2012-12-12 16:38:40	3.94968		-41251.7	25.92	28.37
2012-12-12 16:48:40	3.95662		-41251.7	25.96	28.38
2012-12-12 16:58:40	3.96357		-41251.7	25.97	28.41
2012-12-12 17:08:40	3.97051		-41251.7	25.99	28.45
2012-12-12 17:18:40	3.97746		-41251.7	26.03	28.47
2012-12-12 17:28:40	3.9844		-41251.7	26.05	28.5
2012-12-12 17:38:40	3.99135		-41251.7	26.06	28.5
2012-12-12 17:48:40	3.99829		-41251.7	26.09	28.53
2012-12-12 17:58:40	4.00524		-41251.7	26.11	28.55
2012-12-12 18:08:40	4.01218		-41251.7	26.13	28.58
2012-12-12 18:18:40	4.01912		-41251.7	26.16	28.6
2012-12-12 18:28:40	4.02607		-41251.7	26.18	28.63
2012-12-12 18:38:40	4.03301		-41251.7	26.24	28.67
2012-12-12 18:48:40	4.03996		-41251.7	26.24	28.67
2012-12-12 18:58:40	4.0469		-41251.7	26.29	28.73
2012-12-12 19:08:40	4.05385		-41251.7	26.28	28.74
2012-12-12 19:18:40	4.06079		-41251.7	26.35	28.79
2012-12-12 19:28:40	4.06774		-41251.7	26.38	28.81
2012-12-12 19:38:40	4.07468		-41251.7	26.43	28.86
2012-12-12 19:48:40	4.08162		-41251.7	26.44	28.88
2012-12-12 19:58:40	4.08857		-41251.7	26.49	28.9
2012-12-12 20:08:40	4.09551		-41251.7	26.52	28.95
2012-12-12 20:18:40	4.10246		-41251.7	26.49	28.91
2012-12-12 20:28:40	4.1094		-41251.7	26.57	28.99
2012-12-12 20:38:40	4.11635		-41251.7	26.53	28.93
2012-12-12 20:48:40	4.12329		-41251.7	26.6	29.03
2012-12-12 20:58:40	4.13024		-41251.7	26.63	29.07
2012-12-12 21:08:40	4.13718		-41251.7	26.67	29.09
2012-12-12 21:18:40	4.14412		-41251.7	26.68	29.11
2012-12-12 21:28:40	4.15107		-41251.7	26.72	29.15
2012-12-12 21:38:40	4.15801		-41251.7	26.76	29.2
2012-12-12 21:48:40	4.16496		-41251.7	26.81	29.24
2012-12-12 21:58:40	4.1719		-41251.7	26.82	29.26
2012-12-12 22:08:40	4.17885		-41251.7	26.87	29.3
2012-12-12 22:18:40	4.18579		-41251.7	26.89	29.32
2012-12-12 22:28:40	4.19274		-41251.7	26.93	29.36
2012-12-12 22:38:40	4.19968		-41251.7	26.96	29.39
2012-12-12 22:48:40	4.20662		-41251.7	27	29.42
2012-12-12 22:58:40	4.21357		-41251.7	26.99	29.42
2012-12-12 23:08:40	4.22051		-41251.7	27.01	29.45
2012-12-12 23:18:40	4.22746		-41251.7	27.06	29.5
2012-12-12 23:28:40	4.2344		-41251.7	27.11	29.52
2012-12-12 23:38:40	4.24135		-41251.7	27.12	29.55
2012-12-12 23:48:40	4.24829		-41251.7	27.15	29.58
2012-12-12 23:58:40	4.25524		-41251.7	27.18	29.61
2012-12-13 00:08:40	4.26218		-41251.7	27.22	29.66
2012-12-13 00:18:40	4.26912		-41251.7	27.26	29.68
2012-12-13 00:28:40	4.27607		-41251.7	27.28	29.72
2012-12-13 00:38:40	4.28301		-41251.7	27.32	29.75
2012-12-13 00:48:40	4.28996		-41251.7	27.36	29.76
2012-12-13 00:58:40	4.2969		-41251.7	27.38	29.77
2012-12-13 01:08:40	4.30385		-41251.7	27.4	29.83
2012-12-13 01:18:40	4.31079		-41251.7	27.43	29.87
2012-12-13 01:28:40	4.31774		-41251.7	27.46	29.89
2012-12-13 01:38:40	4.32468		-41251.7	27.51	29.94
2012-12-13 01:48:40	4.33162		-41251.7	27.53	29.96
2012-12-13 01:58:40	4.33857		-41251.7	27.57	30.01
2012-12-13 02:08:40	4.34551		-41251.7	27.6	30.03
2012-12-13 02:18:40	4.35246		-41251.7	27.63	30.06
2012-12-13 02:28:40	4.3594		-41251.7	27.66	30.09
2012-12-13 02:38:40	4.36635		-41251.7	27.71	30.13
2012-12-13 02:48:40	4.37329		-41251.7	27.74	30.16
2012-12-13 02:58:40	4.38024		-41251.7	27.74	30.17
2012-12-13 03:08:40	4.38718		-41251.7	27.77	30.19
2012-12-13 03:18:40	4.39412		-41251.7	27.79	30.22
2012-12-13 03:28:40	4.40107		-41251.7	27.83	30.26
2012-12-13 03:38:40	4.40801		-41251.7	27.87	30.29
2012-12-13 03:48:40	4.41496		-41251.7	27.88	30.3
2012-12-13 03:58:40	4.4219		-41251.7	27.92	30.35
2012-12-13 04:08:40	4.42885		-41251.7	27.97	30.38
2012-12-13 04:18:40	4.43579		-41251.7	28	30.42
2012-12-13 04:28:40	4.44274		-41251.7	28.02	30.45
2012-12-13 04:38:40	4.44968		-41251.7	28.06	30.49
2012-12-13 04:48:40	4.45662		-41251.7	28.07	30.5
2012-12-13 04:58:40	4.46357		-41251.7	28.13	30.54
2012-12-13 05:08:40	4.47051		-41251.7	28.15	30.57
2012-12-13 05:18:40	4.47746		-41251.7	28.19	30.61
2012-12-13 05:28:40	4.4844		-41251.7	28.24	30.64
2012-12-13 05:38:40	4.49135		-41251.7	28.24	30.69
2012-12-13 05:48:40	4.49829		-41251.7	28.3	30.72
2012-12-13 05:58:40	4.50524		-41251.7	28.32	30.75
2012-12-13 06:08:40	4.51218		-41251.7	28.35	30.78
2012-12-13 06:18:40	4.51912		-41251.7	28.39	30.82
2012-12-13 06:28:40	4.52607		-41251.7	28.43	30.85
2012-12-13 06:38:40	4.53301		-41251.7	28.47	30.9
2012-12-13 06:48:40	4.53996		-41251.7	28.5	30.93
2012-12-13 06:58:40	4.5469		-41251.7	28.53	30.94
2012-12-13 07:08:40	4.55385		-41251.7	28.57	30.97
2012-12-13 07:18:40	4.56079		-41251.7	28.58	31.01
2012-12-13 07:28:40	4.56774		-41251.7	28.62	31.05
2012-12-13 07:38:40	4.57468		-41251.7	28.66	31.09
2012-12-13 07:48:40	4.58162		-41251.7	28.71	31.13
2012-12-13 07:58:40	4.58857		-41251.7	28.73	31.13
2012-12-13 08:08:40	4.59551		-41251.7	28.77	31.18
2012-12-13 08:18:40	4.60246		-41251.7	28.81	31.22
2012-12-13 08:28:40	4.6094		-41251.7	28.83	31.26
2012-12-13 08:38:40	4.61635		-41251.7	28.87	31.28
2012-12-13 08:48:40	4.62329		-41251.7	28.87	31.3
2012-12-13 08:58:40	4.63024		-41251.7	28.91	31.34
2012-12-13 09:08:40	4.63718		-41251.7	28.95	31.37
2012-12-13 09:18:40	4.64412		-41251.7	29	31.42
2012-12-13 09:28:40	4.65107		-41251.7	29.03	31.44
2012-12-13 09:38:40	4.65801		-41251.7	29.04	31.46
2012-12-13 09:48:40	4.66496		-41251.7	29.06	31.5
2012-12-13 09:58:40	4.6719		-41251.7	28.92	31.35
2012-12-13 10:08:40	4.67885		-41251.7	29.07	31.51
2012-12-13 10:18:40	4.68579		-41251.7	29.1	31.54
2012-12-13 10:28:40	4.69274		-41251.7	29.16	31.61
2012-12-13 10:38:40	4.69968		-41251.7	29.2	31.64
2012-12-13 10:48:40	4.70662		-41251.7	29.24	31.68
2012-12-13 10:58:40	4.71357		-41251.7	29.24	31.69
2012-12-13 11:08:40	4.72051		-41251.7	29.29	31.74
2012-12-13 11:18:40	4.72746		-41251.7	29.31	31.75
2012-12-13 11:28:40	4.7344		-41251.7	29.38	31.81
2012-12-13 11:38:40	4.74135		-41251.7	29.38	31.85
2012-12-13 11:48:40	4.74829		-41251.7	29.43	31.87
2012-12-13 11:58:40	4.75524		-41251.7	29.45	31.89
2012-12-13 12:08:40	4.76218		-41251.7	29.49	31.93
2012-12-13 12:18:40	4.76912		-41251.7	29.53	31.97
2012-12-13 12:28:40	4.77607		-41251.7	29.56	32.03
2012-12-13 12:38:40	4.78301		-41251.7	29.61	32.05
2012-12-13 12:48:40	4.78996		-41251.7	29.64	32.11
2012-12-13 12:58:40	4.7969		-41251.7	29.66	32.09
2012-12-13 13:08:40	4.80385		-41251.7	29.25	31.68
2012-12-13 13:18:40	4.81079		-41251.7	29.33	31.77
2012-12-13 13:28:40	4.81774		-41251.7	29.54	31.97
2012-12-13 13:38:40	4.82468		-41251.7	29.72	32.12
2012-12-13 13:48:40	4.83162		-41251.7	29.78	32.18
2012-12-13 13:58:40	4.83857		-41251.7	29.82	32.25
2012-12-13 14:08:40	4.84551		-41251.7	29.76	32.17
2012-12-13 14:18:40	4.85246		-41251.7	29.81	32.22
2012-12-13 14:28:40	4.8594		-41251.7	29.9	32.29
2012-12-13 14:38:40	4.86635		-41251.7	29.93	32.34
2012-12-13 14:48:40	4.87329		-41251.7	29.99	32.4
2012-12-13 14:58:40	4.88024		-41251.7	30.08	32.47
2012-12-13 15:08:40	4.88718		-41251.7	30.13	32.53
2012-12-13 15:18:40	4.89412		-41251.7	30.21	32.62
2012-12-13 15:28:40	4.90107		-41251.7	30.26	32.63
2012-12-13 15:38:40	4.90801		-41251.7	30.27	32.67
2012-12-13 15:48:40	4.91496		-41251.7	30.36	32.78
2012-12-13 15:58:40	4.9219		-41251.7	30.4	32.8
2012-12-13 16:08:40	4.92885		-41251.7	30.44	32.81
2012-12-13 16:18:40	4.93579		-41251.7	30.5	32.89
2012-12-13 16:28:40	4.94274		-41251.7	30.57	32.97
2012-12-13 16:38:40	4.94968		-41251.7	30.63	33.02
2012-12-13 16:48:40	4.95662		-41251.7	30.71	33.08
2012-12-13 16:58:40	4.96357		-41251.7	30.74	33.13
2012-12-13 17:08:40	4.97051		-41251.7	30.79	33.2
2012-12-13 17:18:40	4.97746		-41251.7	30.84	33.23
2012-12-13 17:28:40	4.9844		-41251.7	30.9	33.29
2012-12-13 17:38:40	4.99135		-41251.7	30.95	33.32
2012-12-13 17:48:40	4.99829		-41251.7	31.01	33.4
2012-12-13 17:58:40	5.00524		-41251.7	31.06	33.45
2012-12-13 18:08:40	5.01218		-41251.7	31.12	33.51
2012-12-13 18:18:40	5.01912		-41251.7	31.16	33.55
2012-12-13 18:28:40	5.02607		-41251.7	31.22	33.61
2012-12-13 18:38:40	5.03301		-41251.7	31.29	33.68
2012-12-13 18:48:40	5.03996		-41251.7	31.33	33.73
2012-12-13 18:58:40	5.0469		-41251.7	31.39	33.79
2012-12-13 19:08:40	5.05385		-41251.7	31.47	33.84
2012-12-13 19:18:40	5.06079		-41251.7	31.56	33.93
2012-12-13 19:28:40	5.06774		-41251.7	31.57	33.96
2012-12-13 19:38:40	5.07468		-41251.7	31.62	34.02
2012-12-13 19:48:40	5.08162		-41251.7	31.66	34.07
2012-12-13 19:58:40	5.08857		-41251.7	31.72	34.1
2012-12-13 20:08:40	5.09551		-41251.7	31.78	34.17
2012-12-13 20:18:40	5.10246		-41251.7	31.82	34.22
2012-12-13 20:28:40	5.1094		-41251.7	31.88	34.25
2012-12-13 20:38:40	5.11635		-41251.7	31.93	34.33
2012-12-13 20:48:40	5.12329		-41251.7	32	34.39
2012-12-13 20:58:40	5.13024		-41251.7	32.06	34.45
2012-12-13 21:08:40	5.13718		-41251.7	32.12	34.5
2012-12-13 21:18:40	5.14412		-41251.7	32.16	34.55
2012-12-13 21:28:40	5.15107		-41251.7	32.23	34.62
2012-12-13 21:38:40	5.15801		-41251.7	32.28	34.68
2012-12-13 21:48:40	5.16496		-41251.7	32.36	34.73
2012-12-13 21:58:40	5.1719		-41251.7	32.4	34.79
2012-12-13 22:08:40	5.17885		-41251.7	32.41	34.8
2012-12-13 22:18:40	5.18579		-41251.7	32.51	34.89
2012-12-13 22:28:40	5.19274		-41251.7	32.56	34.93
2012-12-13 22:38:40	5.19968		-41251.7	32.6	34.98
2012-12-13 22:48:40	5.20662		-41251.7	32.65	35.02
2012-12-13 22:58:40	5.21357		-41251.7	32.69	35.06
2012-12-13 23:08:40	5.22051		-41251.7	32.73	35.11
2012-12-13 23:18:40	5.22746		-41251.7	32.79	35.16
2012-12-13 23:28:40	5.2344		-41251.7	32.85	35.22
2012-12-13 23:38:40	5.24135		-41251.7	32.9	35.27
2012-12-13 23:48:40	5.24829		-41251.7	32.95	35.3
2012-12-13 23:58:40	5.25524		-41251.7	32.98	35.35
2012-12-14 00:08:40	5.26218		-41251.7	33.04	35.41
2012-12-14 00:18:40	5.26912		-41251.7	33.06	35.43
2012-12-14 00:28:40	5.27607		-41251.7	33.11	35.48
2012-12-14 00:38:40	5.28301		-41251.7	33.19	35.53
2012-12-14 00:48:40	5.28996		-41251.7	33.23	35.6
2012-12-14 00:58:40	5.2969		-41251.7	33.28	35.65
2012-12-14 01:08:40	5.30385		-41251.7	33.33	35.68
2012-12-14 01:18:40	5.31079		-41251.7	33.38	35.73
2012-12-14 01:28:40	5.31774		-41251.7	33.43	35.8
2012-12-14 01:38:40	5.32468		-41251.7	33.48	35.83
2012-12-14 01:48:40	5.33162		-41251.7	33.52	35.89
2012-12-14 01:58:40	5.33857		-41251.7	33.6	35.97
2012-12-14 02:08:40	5.34551		-41251.7	33.64	36.02
2012-12-14 02:18:40	5.35246		-41251.7	33.71	36.08
2012-12-14 02:28:40	5.3594		-41251.7	33.75	36.12
2012-12-14 02:38:40	5.36635		-41251.7	33.82	36.18
2012-12-14 02:48:40	5.37329		-41251.7	33.89	36.25
2012-12-14 02:58:40	5.38024		-41251.7	33.95	36.3
2012-12-14 03:08:40	5.38718		-41251.7	33.97	36.33
2012-12-14 03:18:40	5.39412		-41251.7	34.04	36.41
2012-12-14 03:28:40	5.40107		-41251.7	34.09	36.45
2012-12-14 03:38:40	5.40801		-41251.7	34.15	36.52
2012-12-14 03:48:40	5.41496		-41251.7	34.19	36.55
2012-12-14 03:58:40	5.4219		-41251.7	34.25	36.62
2012-12-14 04:08:40	5.42885		-41251.7	34.32	36.69
2012-12-14 04:18:40	5.43579		-41251.7	34.35	36.73
2012-12-14 04:28:40	5.44274		-41251.7	34.44	36.78
2012-12-14 04:38:40	5.44968		-41251.7	34.47	36.85
2012-12-14 04:48:40	5.45662		-41251.7	34.52	36.89
2012-12-14 04:58:40	5.46357		-41251.7	34.59	36.96
2012-12-14 05:08:40	5.47051		-41251.7	34.66	37.03
2012-12-14 05:18:40	5.47746		-41251.7	34.72	37.08
2012-12-14 05:28:40	5.4844		-41251.7	34.78	37.14
2012-12-14 05:38:40	5.49135		-41251.7	34.84	37.19
2012-12-14 05:48:40	5.49829		-41251.7	34.87	37.23
2012-12-14 05:58:40	5.50524		-41251.7	34.92	37.29
2012-12-14 06:08:40	5.51218		-41251.7	35	37.36
2012-12-14 06:18:40	5.51912		-41251.7	35.06	37.43
2012-12-14 06:28:40	5.52607		-41251.7	35.13	37.5
2012-12-14 06:38:40	5.53301		-41251.7	35.2	37.56
2012-12-14 06:48:40	5.53996		-41251.7	35.25	37.62
2012-12-14 06:58:40	5.5469		-41251.7	35.32	37.68
2012-12-14 07:08:40	5.55385		-41251.7	35.37	37.74
2012-12-14 07:18:40	5.56079		-41251.7	35.41	37.78
2012-12-14 07:28:40	5.56774		-41251.7	35.48	37.85
2012-12-14 07:38:40	5.57468		-41251.7	35.57	37.92
2012-12-14 07:48:40	5.58162		-41251.7	35.6	37.96
2012-12-14 07:58:40	5.58857		-41251.7	35.63	37.99
2012-12-14 08:08:40	5.59551		-41251.7	35.61	37.99
2012-12-14 08:18:40	5.60246		-41251.7	35.65	38.02
2012-12-14 08:28:40	5.6094		-41251.7	35.67	38.04
2012-12-14 08:38:40	5.61635		-41251.7	35.75	38.12
2012-12-14 08:48:40	5.62329		-41251.7	35.8	38.16
2012-12-14 08:58:40	5.63024		-41251.7	35.87	38.21
2012-12-14 09:08:40	5.63718		-41251.7	35.92	38.28
2012-12-14 09:18:40	5.64412		-41251.7	35.96	38.32
2012-12-14 09:28:40	5.65107		-41251.7	35.96	38.31
2012-12-14 09:38:40	5.65801		-41251.7	36.06	38.42
2012-12-14 09:48:40	5.66496		-41251.7	36.11	38.47
2012-12-14 09:58:40	5.6719		-41251.7	36.17	38.55
2012-12-14 10:08:40	5.67885		-41251.7	36.26	38.61
2012-12-14 10:18:40	5.68579		-41251.7	36.32	38.68
2012-12-14 10:28:40	5.69274		-41251.7	36.39	38.75
2012-12-14 10:38:40	5.69968		-41251.7	36.44	38.81
2012-12-14 10:48:40	5.70662		-41251.7	36.51	38.87
2012-12-14 10:58:40	5.71357		-41251.7	36.56	38.91
2012-12-14 11:08:40	5.72051		-41251.7	36.61	38.96
2012-12-14 11:18:40	5.72746		-41251.7	36.65	39.01
2012-12-14 11:28:40	5.7344		-41251.7	36.7	39.05
2012-12-14 11:38:40	5.74135		-41251.7	36.77	39.12
2012-12-14 11:48:40	5.74829		-41251.7	36.82	39.17
2012-12-14 11:58:40	5.75524		-41251.7	36.9	39.26
2012-12-14 12:08:40	5.76218		-41251.7	36.94	39.3
2012-12-14 12:18:40	5.76912		-41251.7	37.02	39.34
2012-12-14 12:28:40	5.77607		-41251.7	37.06	39.41
2012-12-14 12:38:40	5.78301		-41251.7	37.13	39.49
2012-12-14 12:48:40	5.78996		-41251.7	37.19	39.54
2012-12-14 12:58:40	5.7969		-41251.7	37.26	39.61
2012-12-14 13:08:40	5.80385		-41251.7	37.31	39.66
2012-12-14 13:18:40	5.81079		-41251.7	37.37	39.72
2012-12-14 13:28:40	5.81774		-41251.7	37.44	39.78
2012-12-14 13:38:40	5.82468		-41251.7	37.52	39.86
2012-12-14 13:48:40	5.83162		-41251.7	37.58	39.92
2012-12-14 13:58:40	5.83857		-41251.7	37.63	39.99
2012-12-14 14:08:40	5.84551		-41251.7	37.67	40.03
2012-12-14 14:18:40	5.85246		-41251.7	37.76	40.09
2012-12-14 14:28:40	5.8594		-41251.7	37.83	40.17
2012-12-14 14:38:40	5.86635		-41251.7	37.88	40.23
2012-12-14 14:48:40	5.87329		-41251.7	37.93	40.28
2012-12-14 14:58:40	5.88024		-41251.7	38	40.34
2012-12-14 15:08:40	5.88718		-41251.7	38.07	40.42
2012-12-14 15:18:40	5.89412		-41251.7	38.12	40.48
2012-12-14 15:28:40	5.90107		-41251.7	38.2	40.54
2012-12-14 15:38:40	5.90801		-41251.7	38.26	40.6
2012-12-14 15:48:40	5.91496		-41251.7	38.32	40.67
2012-12-14 15:58:40	5.9219		-41251.7	38.41	40.74
2012-12-14 16:08:40	5.92885		-41251.7	38.46	40.79
2012-12-14 16:18:40	5.93579		-41251.7	38.55	40.87
2012-12-14 16:28:40	5.94274		-41251.7	38.62	40.94
2012-12-14 16:38:40	5.94968		-41251.7	38.66	41
2012-12-14 16:48:40	5.95662		-41251.7	38.74	41.07
2012-12-14 16:58:40	5.96357		-41251.7	38.81	41.13
2012-12-14 17:08:40	5.97051		-41251.7	38.9	41.23
2012-12-14 17:18:40	5.97746		-41251.7	38.94	41.29
2012-12-14 17:28:40	5.9844		-41251.7	39.05	41.35
2012-12-14 17:38:40	5.99135		-41251.7	39.07	41.41
2012-12-14 17:48:40	5.99829		-41251.7	39.19	41.52
2012-12-14 17:58:40	6.00524		-41251.7	39.24	41.58
2012-12-14 18:08:40	6.01218		-41251.7	39.35	41.66
2012-12-14 18:18:40	6.01912		-41251.7	39.43	41.74
2012-12-14 18:28:40	6.02607		-41251.7	39.48	41.8
2012-12-14 18:38:40	6.03301		-41251.7	39.56	41.89
2012-12-14 18:48:40	6.03996		-41251.7	39.65	42
2012-12-14 18:58:40	6.0469		-41251.7	39.79	42.13
2012-12-14 19:08:40	6.05385		-41251.7	39.77	42.13
2012-12-14 19:18:40	6.06079		-41251.7	39.57	41.93
2012-12-14 19:28:40	6.06774		-41251.7	39.84	42.18
2012-12-14 19:38:40	6.07468		-41251.7	39.93	42.25
2012-12-14 19:48:40	6.08162		-41251.7	40.02	42.34
2012-12-14 19:58:40	6.08857		-41251.7	40.1	42.4
2012-12-14 20:08:40	6.09551		-41251.7	40.05	42.38
2012-12-14 20:18:40	6.10246		-41251.7	40.15	42.49
2012-12-14 20:28:40	6.1094		-41251.7	40.24	42.55
2012-12-14 20:38:40	6.11635		-41251.7	40.36	42.68
2012-12-14 20:48:40	6.12329		-41251.7	40.42	42.72
2012-12-14 20:58:40	6.13024		-41251.7	40.48	42.8
2012-12-14 21:08:40	6.13718		-41251.7	40.59	42.87
2012-12-14 21:18:40	6.14412		-41251.7	40.67	42.99
2012-12-14 21:28:40	6.15107		-41251.7	40.72	43.03
2012-12-14 21:38:40	6.15801		-41251.7	40.83	43.15
2012-12-14 21:48:40	6.16496		-41251.7	40.9	43.22
2012-12-14 21:58:40	6.1719		-41251.7	41	43.31
2012-12-14 22:08:40	6.17885		-41251.7	41.06	43.38
2012-12-14 22:18:40	6.18579		-41251.7	41.14	43.47
2012-12-14 22:28:40	6.19274		-41251.7	41.25	43.56
2012-12-14 22:38:40	6.19968		-41251.7	41.3	43.61
2012-12-14 22:48:40	6.20662		-41251.7	41.4	43.72
2012-12-14 22:58:40	6.21357		-41251.7	41.47	43.79
2012-12-14 23:08:40	6.22051		-41251.7	41.56	43.88
2012-12-14 23:18:40	6.22746		-41251.7	41.63	43.95
2012-12-14 23:28:40	6.2344		-41251.7	41.69	44.03
2012-12-14 23:38:40	6.24135		-41251.7	41.8	44.1
2012-12-14 23:48:40	6.24829		-41251.7	41.9	44.2
2012-12-14 23:58:40	6.25524		-41251.7	41.99	44.31
2012-12-15 00:08:40	6.26218		-41251.7	42.03	44.34
2012-12-15 00:18:40	6.26912		-41251.7	42.1	44.42
2012-12-15 00:28:40	6.27607		-41251.7	42.21	44.52
2012-12-15 00:38:40	6.28301		-41251.7	42.26	44.58
2012-12-15 00:48:40	6.28996		-41251.7	42.35	44.68
2012-12-15 00:58:40	6.2969		-41251.7	42.4	44.7
2012-12-15 01:08:40	6.30385		-41251.7	42.51	44.84
2012-12-15 01:18:40	6.31079		-41251.7	42.6	44.92
2012-12-15 01:28:40	6.31774		-41251.7	42.68	44.97
2012-12-15 01:38:40	6.32468		-41251.7	42.74	45.07
2012-12-15 01:48:40	6.33162		-41251.7	42.82	45.14
2012-12-15 01:58:40	6.33857		-41251.7	42.9	45.21
2012-12-15 02:08:40	6.34551		-41251.7	42.99	45.3
2012-12-15 02:18:40	6.35246		-41251.7	43.08	45.39
2012-12-15 02:28:40	6.3594		-41251.7	43.14	45.47
2012-12-15 02:38:40	6.36635		-41251.7	42.29	45.55
2012-12-15 02:48:40	6.37329		-41251.7	43.3	45.63
2012-12-15 02:58:40	6.38024		-41251.7	43.4	45.71
2012-12-15 03:08:40	6.38718		-41251.7	43.47	45.8
2012-12-15 03:18:40	6.39412		-41251.7	43.55	45.86
2012-12-15 03:28:40	6.40107		-41251.7	43.65	45.97
2012-12-15 03:38:40	6.40801		-41251.7	43.7	46.03
2012-12-15 03:48:40	6.41496		-41251.7	43.8	46.08
2012-12-15 03:58:40	6.4219		-41251.7	43.86	46.17
2012-12-15 04:08:40	6.42885		-41251.7	43.92	46.23
2012-12-15 04:18:40	6.43579		-41251.7	44.02	46.34
2012-12-15 04:28:40	6.44274		-41251.7	44.08	46.41
2012-12-15 04:38:40	6.44968		-41251.7	44.16	46.48
2012-12-15 04:48:40	6.45662		-41251.7	44.26	46.56
2012-12-15 04:58:40	6.46357		-41251.7	44.33	46.65
2012-12-15 05:08:40	6.47051		-41251.7	44.42	46.73
2012-12-15 05:18:40	6.47746		-41251.7	44.49	46.8
2012-12-15 05:28:40	6.4844		-41251.7	44.57	46.85
2012-12-15 05:38:40	6.49135		-41251.7	44.63	46.94
2012-12-15 05:48:40	6.49829		-41251.7	44.72	47.02
2012-12-15 05:58:40	6.50524		-41251.7	44.8	47.11
2012-12-15 06:08:40	6.51218		-41251.7	44.88	47.2
2012-12-15 06:18:40	6.51912		-41251.7	44.97	47.29
2012-12-15 06:28:40	6.52607		-41251.7	45.06	47.38
2012-12-15 06:38:40	6.53301		-41251.7	45.16	47.46
2012-12-15 06:48:40	6.53996		-41251.7	45.24	47.56
2012-12-15 06:58:40	6.5469		-41251.7	45.34	47.65
2012-12-15 07:08:40	6.55385		-41251.7	45.42	47.73
2012-12-15 07:18:40	6.56079		-41251.7	45.5	47.81
2012-12-15 07:28:40	6.56774		-41251.7	45.58	47.89
2012-12-15 07:38:40	6.57468		-41251.7	45.65	47.98
2012-12-15 07:48:40	6.58162		-41251.7	45.76	48.07
2012-12-15 07:58:40	6.58857		-41251.7	45.85	48.16
2012-12-15 08:08:40	6.59551		-41251.7	45.92	48.25
2012-12-15 08:18:40	6.60246		-41251.7	46.02	48.32
2012-12-15 08:28:40	6.6094		-41251.7	46.11	48.4
2012-12-15 08:38:40	6.61635		-41251.7	46.19	48.48
2012-12-15 08:48:40	6.62329		-41251.7	46.28	48.57
2012-12-15 08:58:40	6.63024		-41251.7	46.35	48.67
2012-12-15 09:08:40	6.63718		-41251.7	46.46	48.76
2012-12-15 09:18:40	6.64412		-41251.7	46.53	48.83
2012-12-15 09:28:40	6.65107		-41251.7	46.62	48.92
2012-12-15 09:38:40	6.65801		-41251.7	46.72	49.03
2012-12-15 09:48:40	6.66496		-41251.7	46.82	49.11
2012-12-15 09:58:40	6.6719		-41251.7	46.9	49.21
2012-12-15 10:08:40	6.67885		-41251.7	46.98	49.28
2012-12-15 10:18:40	6.68579		-41251.7	47.07	49.36
2012-12-15 10:28:40	6.69274		-41251.7	47.14	49.44
2012-12-15 10:38:40	6.69968		-41251.7	47.24	49.54
2012-12-15 10:48:40	6.70662		-41251.7	47.3	49.61
2012-12-15 10:58:40	6.71357		-41251.7	47.36	49.66
2012-12-15 11:08:40	6.72051		-41251.7	47.47	49.78
2012-12-15 11:18:40	6.72746		-41251.7	47.57	49.86
2012-12-15 11:28:40	6.7344		-41251.7	47.64	49.94
2012-12-15 11:38:40	6.74135		-41251.7	47.7	50.01
2012-12-15 11:48:40	6.74829		-41251.7	47.69	49.99
2012-12-15 11:58:40	6.75524		-41251.7	47.84	50.14
2012-12-15 12:08:40	6.76218		-41251.7	47.93	50.2
2012-12-15 12:18:40	6.76912		-41251.7	48.02	50.32
2012-12-15 12:28:40	6.77607		-41251.7	48.11	50.39
2012-12-15 12:38:40	6.78301		-41251.7	48.18	50.47
2012-12-15 12:48:40	6.78996		-41251.7	48.22	50.5
2012-12-15 12:58:40	6.7969		-41251.7	48.32	50.61
2012-12-15 13:08:40	6.80385		-41251.7	48.44	50.72
2012-12-15 13:18:40	6.81079		-41251.7	48.54	50.83
2012-12-15 13:28:40	6.81774		-41251.7	48.63	50.9
2012-12-15 13:38:40	6.82468		-41251.7	48.71	51
2012-12-15 13:48:40	6.83162		-41251.7	48.77	51.07
2012-12-15 13:58:40	6.83857		-41251.7	48.88	51.13
2012-12-15 14:08:40	6.84551		-41251.7	48.94	51.25
2012-12-15 14:18:40	6.85246		-41251.7	49.08	51.35
2012-12-15 14:28:40	6.8594		-41251.7	49.16	51.45
2012-12-15 14:38:40	6.86635		-41251.7	49.25	51.55
2012-12-15 14:48:40	6.87329		-41251.7	49.33	51.62
2012-12-15 14:58:40	6.88024		-41251.7	49.46	51.72
2012-12-15 15:08:40	6.88718		-41251.7	49.54	51.82
2012-12-15 15:18:40	6.89412		-41251.7	49.63	51.91
2012-12-15 15:28:40	6.90107		-41251.7	49.72	52.01
2012-12-15 15:38:40	6.90801		-41251.7	49.8	51.58
2012-12-15 15:48:40	6.91496		-41251.7	49.9	52.18
2012-12-15 15:58:40	6.9219		-41251.7	49.97	52.27
2012-12-15 16:08:40	6.92885		-41251.7	50.09	52.37
2012-12-15 16:18:40	6.93579		-41251.7	50.18	52.47
2012-12-15 16:28:40	6.94274		-41251.7	50.28	52.58
2012-12-15 16:38:40	6.94968		-41251.7	50.39	52.65
2012-12-15 16:48:40	6.95662		-41251.7	50.49	52.76
2012-12-15 16:58:40	6.96357		-41251.7	50.58	52.85
2012-12-15 17:08:40	6.97051		-41251.7	50.66	52.95
2012-12-15 17:18:40	6.97746		-41251.7	50.77	53.05
2012-12-15 17:28:40	6.9844		-41251.7	50.86	53.14
2012-12-15 17:38:40	6.99135		-41251.7	50.94	53.22
2012-12-15 17:48:40	6.99829		-41251.7	51.03	53.32
2012-12-15 17:58:40	7.00524		-41251.7	51.12	53.41
2012-12-15 18:08:40	7.01218		-41251.7	51.24	53.51
2012-12-15 18:18:40	7.01912		-41251.7	51.33	53.62
2012-12-15 18:28:40	7.02607		-41251.7	51.45	53.74
2012-12-15 18:38:40	7.03301		-41251.7	51.56	53.85
2012-12-15 18:48:40	7.03996		-41251.7	51.68	53.96
2012-12-15 18:58:40	7.0469		-41251.7	51.74	54.06
2012-12-15 19:08:40	7.05385		-41251.7	51.9	54.19
2012-12-15 19:18:40	7.06079		-41251.7	52.04	54.31
2012-12-15 19:28:40	7.06774		-41251.7	52.13	54.42
2012-12-15 19:38:40	7.07468		-41251.7	52.24	54.53
2012-12-15 19:48:40	7.08162		-41251.7	52.36	54.65
2012-12-15 19:58:40	7.08857		-41251.7	52.47	54.74
2012-12-15 20:08:40	7.09551		-41251.7	52.59	54.87
2012-12-15 20:18:40	7.10246		-41251.7	52.7	54.99
2012-12-15 20:28:40	7.1094		-41251.7	52.81	55.09
2012-12-15 20:38:40	7.11635		-41251.7	52.91	55.2
2012-12-15 20:48:40	7.12329		-41251.7	53.03	55.31
2012-12-15 20:58:40	7.13024		-41251.7	53.15	55.43
2012-12-15 21:08:40	7.13718		-41251.7	53.25	55.54
2012-12-15 21:18:40	7.14412		-41251.7	53.35	55.65
2012-12-15 21:28:40	7.15107		-41251.7	53.48	55.76
2012-12-15 21:38:40	7.15801		-41251.7	53.58	55.87
2012-12-15 21:48:40	7.16496		-41251.7	53.7	55.99
2012-12-15 21:58:40	7.1719		-41251.7	53.84	56.11
2012-12-15 22:08:40	7.17885		-41251.7	53.93	56.24
2012-12-15 22:18:40	7.18579		-41251.7	54.05	56.33
2012-12-15 22:28:40	7.19274		-41251.7	54.18	56.45
2012-12-15 22:38:40	7.19968		-41251.7	54.3	56.58
2012-12-15 22:48:40	7.20662		-41251.7	54.42	56.72
2012-12-15 22:58:40	7.21357		-41251.7	54.53	56.8
2012-12-15 23:08:40	7.22051		-41251.7	54.66	56.95
2012-12-15 23:18:40	7.22746		-41251.7	54.76	57.06
2012-12-15 23:28:40	7.2344		-41251.7	54.9	57.18
2012-12-15 23:38:40	7.24135		-41251.7	55.01	57.27
2012-12-15 23:48:40	7.24829		-41251.7	55.1	57.39
2012-12-15 23:58:40	7.25524		-41251.7	55.22	57.51
2012-12-16 00:08:40	7.26218		-41251.7	55.36	57.64
2012-12-16 00:18:40	7.26912		-41251.7	55.45	57.73
2012-12-16 00:28:40	7.27607		-41251.7	55.56	57.85
2012-12-16 00:38:40	7.28301		-41251.7	55.68	57.97
2012-12-16 00:48:40	7.28996		-41251.7	55.79	58.1
2012-12-16 00:58:40	7.2969		-41251.7	55.94	58.23
2012-12-16 01:08:40	7.30385		-41251.7	56.07	58.35
2012-12-16 01:18:40	7.31079		-41251.7	56.19	58.46
2012-12-16 01:28:40	7.31774		-41251.7	56.32	58.61
2012-12-16 01:38:40	7.32468		-41251.7	56.41	58.71
2012-12-16 01:48:40	7.33162		-41251.7	56.55	58.83
2012-12-16 01:58:40	7.33857		-41251.7	56.68	58.96
2012-12-16 02:08:40	7.34551		-41251.7	56.81	59.08
2012-12-16 02:18:40	7.35246		-41251.7	56.92	59.21
2012-12-16 02:28:40	7.3594		-41251.7	57.05	59.33
2012-12-16 02:38:40	7.36635		-41251.7	57.16	59.46
2012-12-16 02:48:40	7.37329		-41251.7	57.32	59.58
2012-12-16 02:58:40	7.38024		-41251.7	57.42	59.7
2012-12-16 03:08:40	7.38718		-41251.7	57.56	59.84
2012-12-16 03:18:40	7.39412		-41251.7	57.68	59.94
2012-12-16 03:28:40	7.40107		-41251.7	57.78	60.08
2012-12-16 03:38:40	7.40801		-41251.7	57.86	60.17
2012-12-16 03:48:40	7.41496		-41251.7	58.04	60.31
2012-12-16 03:58:40	7.4219		-41251.7	58.17	60.46
2012-12-16 04:08:40	7.42885		-41251.7	58.29	60.59
2012-12-16 04:18:40	7.43579		-41251.7	58.43	60.71
2012-12-16 04:28:40	7.44274		-41251.7	58.56	60.84
2012-12-16 04:38:40	7.44968		-41251.7	58.69	60.99
2012-12-16 04:48:40	7.45662		-41251.7	58.83	61.12
2012-12-16 04:58:40	7.46357		-41251.7	58.96	61.26
2012-12-16 05:08:40	7.47051		-41251.7	59.12	61.38
2012-12-16 05:18:40	7.47746		-41251.7	59.25	61.55
2012-12-16 05:28:40	7.4844		-41251.7	59.38	61.67
2012-12-16 05:38:40	7.49135		-41251.7	59.53	61.8
2012-12-16 05:48:40	7.49829		-41251.7	59.67	61.97
2012-12-16 05:58:40	7.50524		-41251.7	59.8	62.08
2012-12-16 06:08:40	7.51218		-41251.7	59.95	62.22
2012-12-16 06:18:40	7.51912		-41251.7	60.08	62.36
2012-12-16 06:28:40	7.52607		-41251.7	60.21	62.5
2012-12-16 06:38:40	7.53301		-41251.7	60.33	62.64
2012-12-16 06:48:40	7.53996		-41251.7	60.47	62.77
2012-12-16 06:58:40	7.5469		-41251.7	60.63	62.91
2012-12-16 07:08:40	7.55385		-41251.7	60.77	63.06
2012-12-16 07:18:40	7.56079		-41251.7	60.9	63.17
2012-12-16 07:28:40	7.56774		-41251.7	61.02	63.32
2012-12-16 07:38:40	7.57468		-41251.7	61.16	63.46
2012-12-16 07:48:40	7.58162		-41251.7	61.3	63.57
2012-12-16 07:58:40	7.58857		-41251.7	61.43	63.71
2012-12-16 08:08:40	7.59551		-41251.7	61.56	63.84
2012-12-16 08:18:40	7.60246		-41251.7	61.71	64
2012-12-16 08:28:40	7.6094		-41251.7	61.85	64.14
2012-12-16 08:38:40	7.61635		-41251.7	61.97	64.26
2012-12-16 08:48:40	7.62329		-41251.7	62.15	64.41
2012-12-16 08:58:40	7.63024		-41251.7	62.27	64.56
2012-12-16 09:08:40	7.63718		-41251.7	62.4	64.69
2012-12-16 09:18:40	7.64412		-41251.7	62.53	64.83
2012-12-16 09:28:40	7.65107		-41251.7	62.68	64.98
2012-12-16 09:38:40	7.65801		-41251.7	62.81	65.11
2012-12-16 09:48:40	7.66496		-41251.7	62.95	65.23
2012-12-16 09:58:40	7.6719		-41251.7	63.07	65.37
2012-12-16 10:08:40	7.67885		-41251.7	63.23	65.52
2012-12-16 10:18:40	7.68579		-41251.7	63.35	65.66
2012-12-16 10:28:40	7.69274		-41251.7	63.5	65.81
2012-12-16 10:38:40	7.69968		-41251.7	63.64	65.93
2012-12-16 10:48:40	7.70662		-41251.7	63.81	66.08
2012-12-16 10:58:40	7.71357		-41251.7	63.97	66.26
2012-12-16 11:08:40	7.72051		-41251.7	64.1	66.39
2012-12-16 11:18:40	7.72746		-41251.7	64.25	66.54
2012-12-16 11:28:40	7.7344		-41251.7	64.4	66.68
2012-12-16 11:38:40	7.74135		-41251.7	64.52	66.81
2012-12-16 11:48:40	7.74829		-41251.7	64.61	66.94
2012-12-16 11:58:40	7.75524		-41251.7	64.8	67.09
2012-12-16 12:08:40	7.76218		-41251.7	64.97	67.26
2012-12-16 12:18:40	7.76912		-41251.7	65.12	67.4
2012-12-16 12:28:40	7.77607		-41251.7	65.26	67.54
2012-12-16 12:38:40	7.78301		-41251.7	65.42	67.68
2012-12-16 12:48:40	7.78996		-41251.7	65.54	67.85
2012-12-16 12:58:40	7.7969		-41251.7	65.7	67.99
2012-12-16 13:08:40	7.80385		-41251.7	65.84	68.15
2012-12-16 13:18:40	7.81079		-41251.7	66	68.29
2012-12-16 13:28:40	7.81774		-41251.7	66.14	68.43
2012-12-16 13:38:40	7.82468		-41251.7	66.32	68.59
2012-12-16 13:48:40	7.83162		-41251.7	66.46	68.75
2012-12-16 13:58:40	7.83857		-41251.7	66.54	68.91
2012-12-16 14:08:40	7.84551		-41251.7	66.74	69.03
2012-12-16 14:18:40	7.85246		-41251.7	66.9	69.18
2012-12-16 14:28:40	7.8594		-41251.7	67.06	69.36
2012-12-16 14:38:40	7.86635		-41251.7	67.2	69.53
2012-12-16 14:48:40	7.87329		-41251.7	67.17	69.47
2012-12-16 14:58:40	7.88024		-41251.7	67.4	69.68
2012-12-16 15:08:40	7.88718		-41251.7	67.58	69.87
2012-12-16 15:18:40	7.89412		-41251.7	67.73	70.02
2012-12-16 15:28:40	7.90107		-41251.7	67.89	70.18
2012-12-16 15:38:40	7.90801		-41251.7	68.03	70.34
2012-12-16 15:48:40	7.91496		-41251.7	68.18	70.48
2012-12-16 15:58:40	7.9219		-41251.7	68.36	70.64
2012-12-16 16:08:40	7.92885		-41251.7	68.51	70.81
2012-12-16 16:18:40	7.93579		-41251.7	68.67	70.96
2012-12-16 16:28:40	7.94274		-41251.7	68.83	71.14
2012-12-16 16:38:40	7.94968		-41251.7	68.99	71.28
2012-12-16 16:48:40	7.95662		-41251.7	69.16	71.46
2012-12-16 16:58:40	7.96357		-41251.7	69.3	71.58
2012-12-16 17:08:40	7.97051		-41251.7	69.49	71.79
2012-12-16 17:18:40	7.97746		-41251.7	69.65	71.94
2012-12-16 17:28:40	7.9844		-41251.7	69.83	72.13
2012-12-16 17:38:40	7.99135		-41251.7	70.02	72.31
2012-12-16 17:48:40	7.99829		-41251.7	70.16	72.46
2012-12-16 17:58:40	8.00524		-41251.7	70.35	72.63
2012-12-16 18:08:40	8.01218		-41251.7	70.54	72.82
2012-12-16 18:18:40	8.01912		-41251.7	70.69	72.99
2012-12-16 18:28:40	8.02607		-41251.7	70.87	73.17
2012-12-16 18:38:40	8.03301		-41251.7	71.03	73.33
2012-12-16 18:48:40	8.03996		-41251.7	71.22	73.52
2012-12-16 18:58:40	8.0469		-41251.7	71.39	73.7
2012-12-16 19:08:40	8.05385		-41251.7	71.57	73.86
2012-12-16 19:18:40	8.06079		-41251.7	71.74	74.03
2012-12-16 19:28:40	8.06774		-41251.7	71.91	74.2
2012-12-16 19:38:40	8.07468		-41251.7	72.07	74.38
2012-12-16 19:48:40	8.08162		-41251.7	72.27	74.55
2012-12-16 19:58:40	8.08857		-41251.7	72.39	74.69
2012-12-16 20:08:40	8.09551		-41251.7	72.58	74.86
2012-12-16 20:18:40	8.10246		-41251.7	72.72	75.02
2012-12-16 20:28:40	8.1094		-41251.7	72.91	75.18
2012-12-16 20:38:40	8.11635		-41251.7	73.08	75.38
2012-12-16 20:48:40	8.12329		-41251.7	73.23	75.55
2012-12-16 20:58:40	8.13024		-41251.7	73.44	75.72
2012-12-16 21:08:40	8.13718		-41251.7	73.58	75.89
2012-12-16 21:18:40	8.14412		-41251.7	73.75	76.06
2012-12-16 21:28:40	8.15107		-41251.7	73.97	76.26
2012-12-16 21:38:40	8.15801		-41251.7	74.12	76.43
2012-12-16 21:48:40	8.16496		-41251.7	74.32	76.59
2012-12-16 21:58:40	8.1719		-41251.7	74.48	76.78
2012-12-16 22:08:40	8.17885		-41251.7	74.66	76.95
2012-12-16 22:18:40	8.18579		-41251.7	74.82	77.12
2012-12-16 22:28:40	8.19274		-41251.7	74.98	77.3
2012-12-16 22:38:40	8.19968		-41251.7	75.17	77.49
2012-12-16 22:48:40	8.20662		-41251.7	75.35	77.65
2012-12-16 22:58:40	8.21357		-41251.7	75.52	77.84
2012-12-16 23:08:40	8.22051		-41251.7	75.7	78
2012-12-16 23:18:40	8.22746		-41251.7	75.84	78.16
2012-12-16 23:28:40	8.2344		-41251.7	75.99	78.33
2012-12-16 23:38:40	8.24135		-41251.7	76.18	78.5
2012-12-16 23:48:40	8.24829		-41251.7	76.33	78.65
2012-12-16 23:58:40	8.25524		-41251.7	76.51	78.82
2012-12-17 00:08:40	8.26218		-41251.7	76.72	79
2012-12-17 00:18:40	8.26912		-41251.7	76.86	79.18
2012-12-17 00:28:40	8.27607		-41251.7	77.05	79.35
2012-12-17 00:38:40	8.28301		-41251.7	77.21	79.51
2012-12-17 00:48:40	8.28996		-41251.7	77.38	79.7
2012-12-17 00:58:40	8.2969		-41251.7	77.54	79.85
2012-12-17 01:08:40	8.30385		-41251.7	77.71	80.04
2012-12-17 01:18:40	8.31079		-41251.7	77.89	80.21
2012-12-17 01:28:40	8.31774		-41251.7	78.08	80.37
2012-12-17 01:38:40	8.32468		-41251.7	78.24	80.56
2012-12-17 01:48:40	8.33162		-41251.7	78.41	80.73
2012-12-17 01:58:40	8.33857		-41251.7	78.57	80.88
2012-12-17 02:08:40	8.34551		-41251.7	78.74	81.08
2012-12-17 02:18:40	8.35246		-41251.7	78.91	81.23
2012-12-17 02:28:40	8.3594		-41251.7	79.1	81.41
2012-12-17 02:38:40	8.36635		-41251.7	79.31	81.63
2012-12-17 02:48:40	8.37329		-41251.7	79.48	81.8
2012-12-17 02:58:40	8.38024		-41251.7	79.66	81.98
2012-12-17 03:08:40	8.38718		-41251.7	79.8	82.17
2012-12-17 03:18:40	8.39412		-41251.7	80.01	82.33
2012-12-17 03:28:40	8.40107		-41251.7	80.16	82.51
2012-12-17 03:38:40	8.40801		-41251.7	80.36	82.7
2012-12-17 03:48:40	8.41496		-41251.7	80.54	82.86
2012-12-17 03:58:40	8.4219		-41251.7	80.73	83.05
2012-12-17 04:08:40	8.42885		-41251.7	80.88	83.23
2012-12-17 04:18:40	8.43579		-41251.7	81.06	83.41
2012-12-17 04:28:40	8.44274		-41251.7	81.27	83.59
2012-12-17 04:38:40	8.44968		-41251.7	81.44	83.75
2012-12-17 04:48:40	8.45662		-41251.7	81.62	83.94
2012-12-17 04:58:40	8.46357		-41251.7	81.77	84.12
2012-12-17 05:08:40	8.47051		-41251.7	81.96	84.3
2012-12-17 05:18:40	8.47746		-41251.7	82.07	84.4
2012-12-17 05:28:40	8.4844		-41251.7	82.32	84.66
2012-12-17 05:38:40	8.49135		-41251.7	82.47	84.83
2012-12-17 05:48:40	8.49829		-41251.7	82.64	84.97
2012-12-17 05:58:40	8.50524		-41251.7	82.85	85.17
2012-12-17 06:08:40	8.51218		-41251.7	83.04	85.34
2012-12-17 06:18:40	8.51912		-41251.7	83.19	85.52
2012-12-17 06:28:40	8.52607		-41251.7	83.38	85.74
2012-12-17 06:38:40	8.53301		-41251.7	83.56	85.91
2012-12-17 06:48:40	8.53996		-41251.7	83.76	86.11
2012-12-17 06:58:40	8.5469		-41251.7	83.83	86.27
2012-12-17 07:08:40	8.55385		-41251.7	84.12	86.47
2012-12-17 07:18:40	8.56079		-41251.7	84.31	86.64
2012-12-17 07:28:40	8.56774		-41251.7	84.48	86.84
2012-12-17 07:38:40	8.57468		-41251.7	84.69	87.02
2012-12-17 07:48:40	8.58162		-41251.7	84.89	87.23
2012-12-17 07:58:40	8.58857		-41251.7	85.08	87.42
2012-12-17 08:08:40	8.59551		-41251.7	85.28	87.59
2012-12-17 08:18:40	8.60246		-41251.7	85.49	87.81
2012-12-17 08:28:40	8.6094		-41251.7	85.71	88.02
2012-12-17 08:38:40	8.61635		-41251.7	85.89	88.22
2012-12-17 08:48:40	8.62329		-41251.7	86.08	88.41
2012-12-17 08:58:40	8.63024		-41251.7	86.23	88.6
2012-12-17 09:08:40	8.63718		-41251.7	85.99	88.33
2012-12-17 09:18:40	8.64412		-41251.7	86.43	88.73
2012-12-17 09:28:40	8.65107		-41251.7	86.64	88.94
2012-12-17 09:38:40	8.65801		-41251.7	86.85	89.14
2012-12-17 09:48:40	8.66496		-41251.7	87.07	89.36
2012-12-17 09:58:40	8.6719		-41251.7	87.29	89.56
2012-12-17 10:08:40	8.67885		-41251.7	87.46	89.74
2012-12-17 10:18:40	8.68579		-41251.7	87.62	89.96
2012-12-17 10:28:40	8.69274		-41251.7	87.85	90.19
2012-12-17 10:38:40	8.69968		-41251.7	88.14	90.44
2012-12-17 10:48:40	8.70662		-41251.7	88.34	90.64
2012-12-17 10:58:40	8.71357		-41251.7	88.43	90.81
2012-12-17 11:08:40	8.72051		-41251.7	88.66	91.02
2012-12-17 11:18:40	8.72746		-41251.7	88.94	91.28
2012-12-17 11:28:40	8.7344		-41251.7	89.15	91.48
2012-12-17 11:38:40	8.74135		-41251.7	89.4	91.72
2012-12-17 11:48:40	8.74829		-41251.7	89.66	91.96
2012-12-17 11:58:40	8.75524		-41251.7	89.86	92.18
2012-12-17 12:08:40	8.76218		-41251.7	90.14	92.44
2012-12-17 12:18:40	8.76912		-41251.7	90.37	92.69
2012-12-17 12:28:40	8.77607		-41251.7	90.6	92.9
2012-12-17 12:38:40	8.78301		-41251.7	90.86	93.15
2012-12-17 12:48:40	8.78996		-41251.7	91.13	93.43
2012-12-17 12:58:40	8.7969		-41251.7	91.34	93.65
2012-12-17 13:08:40	8.80385		-41251.7	91.61	93.85
2012-12-17 13:18:40	8.81079		-41251.7	91.86	94.15
2012-12-17 13:28:40	8.81774		-41251.7	92.09	94.36
2012-12-17 13:38:40	8.82468		-41251.7	92.27	94.56
2012-12-17 13:48:40	8.83162		-41251.7	92.53	94.82
2012-12-17 13:58:40	8.83857		-41251.7	92.79	95.07
2012-12-17 14:08:40	8.84551		-41251.7	92.99	95.32
2012-12-17 14:18:40	8.85246		-41251.7	93.28	95.59
2012-12-17 14:28:40	8.8594		-41251.7	93.53	95.84
2012-12-17 14:38:40	8.86635		-41251.7	93.72	96.06
2012-12-17 14:48:40	8.87329		-41251.7	93.98	96.26
2012-12-17 14:58:40	8.88024		-41251.7	94.21	96.51
2012-12-17 15:08:40	8.88718		-41251.7	94.47	96.75
2012-12-17 15:18:40	8.89412		-41251.7	94.71	97.04
2012-12-17 15:28:40	8.90107		-41251.7	94.95	97.24
2012-12-17 15:38:40	8.90801		-41251.7	95.2	97.52
2012-12-17 15:48:40	8.91496		-41251.7	95.45	97.74
2012-12-17 15:58:40	8.9219		-41251.7	95.68	97.98
2012-12-17 16:08:40	8.92885		-41251.7	95.89	98.23
2012-12-17 16:18:40	8.93579		-41251.7	96.19	98.5
2012-12-17 16:28:40	8.94274		-41251.7	96.42	98.71
2012-12-17 16:38:40	8.94968		-41251.7	96.63	98.95
2012-12-17 16:48:40	8.95662		-41251.7	96.87	99.21
2012-12-17 16:58:40	8.96357		-41251.7	97.12	99.45
2012-12-17 17:08:40	8.97051		-41251.7	97.33	99.7
2012-12-17 17:18:40	8.97746		-41251.7	97.62	99.96
2012-12-17 17:28:40	8.9844		-41251.7	97.89	100.18
2012-12-17 17:38:40	8.99135		-41251.7	98.1	100.44
2012-12-17 17:48:40	8.99829		-41251.7	98.34	100.68
2012-12-17 17:58:40	9.00524		-41251.7	98.61	100.92
2012-12-17 18:08:40	9.01218		-41251.7	98.84	101.19
2012-12-17 18:18:40	9.01912		-41251.7	99.13	101.49
2012-12-17 18:28:40	9.02607		-41251.7	99.35	101.7
2012-12-17 18:38:40	9.03301		-41251.7	99.6	101.94
2012-12-17 18:48:40	9.03996		-41251.7	99.84	102.22
2012-12-17 18:58:40	9.0469		-41251.7	100.13	102.47
2012-12-17 19:08:40	9.05385		-41251.7	100.37	102.73
2012-12-17 19:18:40	9.06079		-41251.7	100.68	103.03
2012-12-17 19:28:40	9.06774		-41251.7	100.94	103.3
2012-12-17 19:38:40	9.07468		-41251.7	101.23	103.59
2012-12-17 19:48:40	9.08162		-41251.7	101.49	103.86
2012-12-17 19:58:40	9.08857		-41251.7	101.75	104.11
2012-12-17 20:08:40	9.09551		-41251.7	102.04	104.41
2012-12-17 20:18:40	9.10246		-41251.7	102.28	104.69
2012-12-17 20:28:40	9.1094		-41251.7	102.56	104.94
2012-12-17 20:38:40	9.11635		-41251.7	102.87	105.25
2012-12-17 20:48:40	9.12329		-41251.7	103.15	105.51
2012-12-17 20:58:40	9.13024		-41251.7	103.37	105.75
2012-12-17 21:08:40	9.13718		-41251.7	103.7	106.05
2012-12-17 21:18:40	9.14412		-41251.7	103.97	106.36
2012-12-17 21:28:40	9.15107		-41251.7	104.24	106.64
2012-12-17 21:38:40	9.15801		-41251.7	104.48	106.94
2012-12-17 21:48:40	9.16496		-41251.7	104.83	107.22
2012-12-17 21:58:40	9.1719		-41251.7	105.08	107.49
2012-12-17 22:08:40	9.17885		-41251.7	105.36	107.73
2012-12-17 22:18:40	9.18579		-41251.7	105.66	108.05
2012-12-17 22:28:40	9.19274		-41251.7	105.92	108.33
2012-12-17 22:38:40	9.19968		-41251.7	106.23	108.62
2012-12-17 22:48:40	9.20662		-41251.7	106.51	108.93
2012-12-17 22:58:40	9.21357		-41251.7	106.75	109.17
2012-12-17 23:08:40	9.22051		-41251.7	107.03	109.46
2012-12-17 23:18:40	9.22746		-41251.7	107.38	109.79
2012-12-17 23:28:40	9.2344		-41251.7	107.67	110.06
2012-12-17 23:38:40	9.24135		-41251.7	107.94	110.36
2012-12-17 23:48:40	9.24829		-41251.7	108.21	110.64
2012-12-17 23:58:40	9.25524		-41251.7	108.48	110.89
2012-12-18 00:08:40	9.26218		-41251.7	108.78	111.2
2012-12-18 00:18:40	9.26912		-41251.7	109.04	111.49
2012-12-18 00:28:40	9.27607		-41251.7	109.33	111.77
2012-12-18 00:38:40	9.28301		-41251.7	109.62	112.05
2012-12-18 00:48:40	9.28996		-41251.7	109.93	112.38
2012-12-18 00:58:40	9.2969		-41251.7	110.24	112.69
2012-12-18 01:08:40	9.30385		-41251.7	110.54	113
2012-12-18 01:18:40	9.31079		-41251.7	110.83	113.31
2012-12-18 01:28:40	9.31774		-41251.7	111.13	113.61
2012-12-18 01:38:40	9.32468		-41251.7	111.44	113.91
2012-12-18 01:48:40	9.33162		-41251.7	111.71	114.2
2012-12-18 01:58:40	9.33857		-41251.7	112.02	114.47
2012-12-18 02:08:40	9.34551		-41251.7	112.29	114.79
2012-12-18 02:18:40	9.35246		-41251.7	112.63	115.1
2012-12-18 02:28:40	9.3594		-41251.7	112.91	115.4
2012-12-18 02:38:40	9.36635		-41251.7	113.22	115.73
2012-12-18 02:48:40	9.37329		-41251.7	113.55	116.07
2012-12-18 02:58:40	9.38024		-41251.7	113.82	116.33
2012-12-18 03:08:40	9.38718		-41251.7	114.13	116.64
2012-12-18 03:18:40	9.39412		-41251.7	114.45	116.96
2012-12-18 03:28:40	9.40107		-41251.7	114.71	117.2
2012-12-18 03:38:40	9.40801		-41251.7	114.98	117.51
2012-12-18 03:48:40	9.41496		-41251.7	115.28	117.82
2012-12-18 03:58:40	9.4219		-41251.7	115.58	118.09
2012-12-18 04:08:40	9.42885		-41251.7	115.86	118.41
2012-12-18 04:18:40	9.43579		-41251.7	116.19	118.72
2012-12-18 04:28:40	9.44274		-41251.7	116.47	118.99
2012-12-18 04:38:40	9.44968		-41251.7	116.72	119.31
2012-12-18 04:48:40	9.45662		-41251.7	117.03	119.6
2012-12-18 04:58:40	9.46357		-41251.7	117.33	119.88
2012-12-18 05:08:40	9.47051		-41251.7	117.63	120.2
2012-12-18 05:18:40	9.47746		-41251.7	117.92	120.5
2012-12-18 05:28:40	9.4844		-41251.7	118.19	120.77
2012-12-18 05:38:40	9.49135		-41251.7	118.52	121.1
2012-12-18 05:48:40	9.49829		-41251.7	118.84	121.41
2012-12-18 05:58:40	9.50524		-41251.7	119.1	121.65
2012-12-18 06:08:40	9.51218		-41251.7	119.41	121.97
2012-12-18 06:18:40	9.51912		-41251.7	119.7	122.26
2012-12-18 06:28:40	9.52607		-41251.7	119.96	122.53
2012-12-18 06:38:40	9.53301		-41251.7	120.26	122.88
2012-12-18 06:48:40	9.53996		-41251.7	120.51	123.17
2012-12-18 06:58:40	9.5469		-41251.7	120.82	123.42
2012-12-18 07:08:40	9.55385		-41251.7	121.11	123.68
2012-12-18 07:18:40	9.56079		-41251.7	121.39	123.99
2012-12-18 07:28:40	9.56774		-41251.7	121.64	124.21
2012-12-18 07:38:40	9.57468		-41251.7	121.87	124.5
2012-12-18 07:48:40	9.58162		-41251.7	122.19	124.8
2012-12-18 07:58:40	9.58857		-41251.7	122.42	125.02
2012-12-18 08:08:40	9.59551		-41251.7	122.68	125.27
2012-12-18 08:18:40	9.60246		-41251.7	122.95	125.6
2012-12-18 08:28:40	9.6094		-41251.7	123.21	125.9
2012-12-18 08:38:40	9.61635		-41251.7	123.23	125.85
2012-12-18 08:48:40	9.62329		-41251.7	123.52	126.12
2012-12-18 08:58:40	9.63024		-41251.7	123.78	126.37
2012-12-18 09:08:40	9.63718		-41251.7	124.04	126.62
2012-12-18 09:18:40	9.64412		-41251.7	124.29	126.88
2012-12-18 09:28:40	9.65107		-41251.7	124.55	127.14
2012-12-18 09:38:40	9.65801		-41251.7	124.78	127.41
2012-12-18 09:48:40	9.66496		-41251.7	125.01	127.64
2012-12-18 09:58:40	9.6719		-41251.7	125.26	127.87
2012-12-18 10:08:40	9.67885		-41251.7	125.51	128.14
2012-12-18 10:18:40	9.68579		-41251.7	125.77	128.38
2012-12-18 10:28:40	9.69274		-41251.7	126.01	128.63
2012-12-18 10:38:40	9.69968		-41251.7	126.27	128.91
2012-12-18 10:48:40	9.70662		-41251.7	126.51	129.15
2012-12-18 10:58:40	9.71357		-41251.7	126.76	129.4
2012-12-18 11:08:40	9.72051		-41251.7	127.02	129.66
2012-12-18 11:18:40	9.72746		-41251.7	127.27	129.93
2012-12-18 11:28:40	9.7344		-41251.7	127.53	130.17
2012-12-18 11:38:40	9.74135		-41251.7	127.77	130.45
2012-12-18 11:48:40	9.74829		-41251.7	128.06	130.73
2012-12-18 11:58:40	9.75524		-41251.7	128.31	131
2012-12-18 12:08:40	9.76218		-41251.7	128.6	131.27
2012-12-18 12:18:40	9.76912		-41251.7	128.86	131.55
2012-12-18 12:28:40	9.77607		-41251.7	129.09	131.8
2012-12-18 12:38:40	9.78301		-41251.7	129.36	132.04
2012-12-18 12:48:40	9.78996		-41251.7	129.63	132.28
2012-12-18 12:58:40	9.7969		-41251.7	129.98	132.68
2012-12-18 13:08:40	9.80385		-41251.7	130.21	132.95
2012-12-18 13:18:40	9.81079		-41251.7	130.49	133.21
2012-12-18 13:28:40	9.81774		-41251.7	130.72	133.43
2012-12-18 13:38:40	9.82468		-41251.7	130.93	133.7
2012-12-18 13:48:40	9.83162		-41251.7	131.2	133.93
2012-12-18 13:58:40	9.83857		-41251.7	131.42	134.17
2012-12-18 14:08:40	9.84551		-41251.7	131.71	134.46
2012-12-18 14:18:40	9.85246		-41251.7	131.92	134.66
2012-12-18 14:28:40	9.8594		-41251.7	132.14	134.93
2012-12-18 14:38:40	9.86635		-41251.7	132.46	135.23
2012-12-18 14:48:40	9.87329		-41251.7	132.7	135.47
2012-12-18 14:58:40	9.88024		-41251.7	132.92	135.69
2012-12-18 15:08:40	9.88718		-41251.7	133.19	135.96
2012-12-18 15:18:40	9.89412		-41251.7	133.47	136.23
2012-12-18 15:28:40	9.90107		-41251.7	133.7	136.49
2012-12-18 15:38:40	9.90801		-41251.7	133.96	136.71
2012-12-18 15:48:40	9.91496		-41251.7	134.19	136.99
2012-12-18 15:58:40	9.9219		-41251.7	134.41	137.23
2012-12-18 16:08:40	9.92885		-41251.7	134.68	137.47
2012-12-18 16:18:40	9.93579		-41251.7	134.92	137.72
2012-12-18 16:28:40	9.94274		-41251.7	135.06	137.91
2012-12-18 16:38:40	9.94968		-41251.7	135.25	138.1
2012-12-18 16:48:40	9.95662		-41251.7	135.45	138.31
2012-12-18 16:58:40	9.96357		-41251.7	135.69	138.52
2012-12-18 17:08:40	9.97051		-41251.7	135.91	138.76
2012-12-18 17:18:40	9.97746		-41251.7	136.13	139
2012-12-18 17:28:40	9.9844		-41251.7	136.39	139.22
2012-12-18 17:38:40	9.99135		-41251.7	136.52	139.43
2012-12-18 17:48:40	9.99829		-41251.7	136.8	139.66
2012-12-18 17:58:40	10.0052		-41251.7	137.02	139.89
2012-12-18 18:08:40	10.0122		-41251.7	137.23	140.11
2012-12-18 18:18:40	10.0191		-41251.7	137.48	140.37
2012-12-18 18:28:40	10.0261		-41251.7	137.7	140.58
2012-12-18 18:38:40	10.033		-41251.7	137.91	140.81
2012-12-18 18:48:40	10.04		-41251.7	138.13	141.07
2012-12-18 18:58:40	10.0469		-41251.7	138.35	141.25
2012-12-18 19:08:40	10.0538		-41251.7	138.57	141.5
2012-12-18 19:18:40	10.0608		-41251.7	138.8	141.71
2012-12-18 19:28:40	10.0677		-41251.7	139.05	141.99
2012-12-18 19:38:40	10.0747		-41251.7	139.27	142.19
2012-12-18 19:48:40	10.0816		-41251.7	139.52	142.43
2012-12-18 19:58:40	10.0886		-41251.7	139.74	142.66
2012-12-18 20:08:40	10.0955		-41251.7	139.96	142.91
2012-12-18 20:18:40	10.1025		-41251.7	140.19	143.16
2012-12-18 20:28:40	10.1094		-41251.7	140.44	143.37
2012-12-18 20:38:40	10.1163		-41251.7	140.77	143.74
2012-12-18 20:48:40	10.1233		-41251.7	140.98	143.98
2012-12-18 20:58:40	10.1302		-41251.7	141.24	144.24
2012-12-18 21:08:40	10.1372		-41251.7	141.46	144.43
2012-12-18 21:18:40	10.1441		-41251.7	141.56	144.66
2012-12-18 21:28:40	10.1511		-41251.7	141.89	144.84
2012-12-18 21:38:40	10.158		-41251.7	142.06	145.05
2012-12-18 21:48:40	10.165		-41251.7	142.28	145.27
2012-12-18 21:58:40	10.1719		-41251.7	142.5	145.46
2012-12-18 22:08:40	10.1788		-41251.7	142.65	145.71
2012-12-18 22:18:40	10.1858		-41251.7	142.91	145.97
2012-12-18 22:28:40	10.1927		-41251.7	143.07	146.15
2012-12-18 22:38:40	10.1997		-41251.7	143.31	146.35
2012-12-18 22:48:40	10.2066		-41251.7	143.5	146.55
2012-12-18 22:58:40	10.2136		-41251.7	143.71	146.76
2012-12-18 23:08:40	10.2205		-41251.7	143.91	146.99
2012-12-18 23:18:40	10.2275		-41251.7	144.12	147.21
2012-12-18 23:28:40	10.2344		-41251.7	144.31	147.37
2012-12-18 23:38:40	10.2413		-41251.7	144.5	147.62
2012-12-18 23:48:40	10.2483		-41251.7	144.72	147.8
2012-12-18 23:58:40	10.2552		-41251.7	144.9	148.03
2012-12-19 00:08:40	10.2622		-41251.7	145.11	148.25
2012-12-19 00:18:40	10.2691		-41251.7	145.32	148.43
2012-12-19 00:28:40	10.2761		-41251.7	145.48	148.62
2012-12-19 00:38:40	10.283		-41251.7	145.71	148.84
2012-12-19 00:48:40	10.29		-41251.7	145.93	149.01
2012-12-19 00:58:40	10.2969		-41251.7	146.13	149.23
2012-12-19 01:08:40	10.3038		-41251.7	146.32	149.46
2012-12-19 01:18:40	10.3108		-41251.7	146.52	149.67
2012-12-19 01:28:40	10.3177		-41251.7	146.7	149.85
2012-12-19 01:38:40	10.3247		-41251.7	146.87	150.06
2012-12-19 01:48:40	10.3316		-41251.7	147.08	150.25
2012-12-19 01:58:40	10.3386		-41251.7	147.24	150.48
2012-12-19 02:08:40	10.3455		-41251.7	147.47	150.69
2012-12-19 02:18:40	10.3525		-41251.7	147.68	150.91
2012-12-19 02:28:40	10.3594		-41251.7	147.88	151.14
2012-12-19 02:38:40	10.3663		-41251.7	148.07	151.31
2012-12-19 02:48:40	10.3733		-41251.7	148.27	151.5
2012-12-19 02:58:40	10.3802		-41251.7	148.47	151.74
2012-12-19 03:08:40	10.3872		-41251.7	148.66	151.92
2012-12-19 03:18:40	10.3941		-41251.7	148.87	152.12
2012-12-19 03:28:40	10.4011		-41251.7	149.06	152.38
2012-12-19 03:38:40	10.408		-41251.7	149.25	152.56
2012-12-19 03:48:40	10.415		-41251.7	149.45	152.76
2012-12-19 03:58:40	10.4219		-41251.7	149.65	152.94
2012-12-19 04:08:40	10.4288		-41251.7	149.82	153.15
2012-12-19 04:18:40	10.4358		-41251.7	150.01	153.36
2012-12-19 04:28:40	10.4427		-41251.7	150.13	153.53
2012-12-19 04:38:40	10.4497		-41251.7	150.34	153.74
2012-12-19 04:48:40	10.4566		-41251.7	150.57	153.96
2012-12-19 04:58:40	10.4636		-41251.7	150.75	154.15
2012-12-19 05:08:40	10.4705		-41251.7	150.96	154.38
2012-12-19 05:18:40	10.4775		-41251.7	151.15	154.58
2012-12-19 05:28:40	10.4844		-41251.7	151.34	154.75
2012-12-19 05:38:40	10.4913		-41251.7	151.51	154.97
2012-12-19 05:48:40	10.4983		-41251.7	151.71	155.14
2012-12-19 05:58:40	10.5052		-41251.7	151.88	155.35
2012-12-19 06:08:40	10.5122		-41251.7	152.08	155.41
2012-12-19 06:18:40	10.5191		-41251.7	152.27	155.73
2012-12-19 06:28:40	10.5261		-41251.7	152.43	155.93
2012-12-19 06:38:40	10.533		-41251.7	152.6	156.13
2012-12-19 06:48:40	10.54		-41251.7	152.77	156.31
2012-12-19 06:58:40	10.5469		-41251.7	152.97	156.53
2012-12-19 07:08:40	10.5538		-41251.7	153.14	156.7
2012-12-19 07:18:40	10.5608		-41251.7	153.33	156.92
2012-12-19 07:28:40	10.5677		-41251.7	153.52	157.11
2012-12-19 07:38:40	10.5747		-41251.7	153.69	157.32
2012-12-19 07:48:40	10.5816		-41251.7	153.88	157.53
2012-12-19 07:58:40	10.5886		-41251.7	154.06	157.75
2012-12-19 08:08:40	10.5955		-41251.7	154.22	157.99
2012-12-19 08:18:40	10.6025		-41251.7	154.11	158.04
2012-12-19 08:28:40	10.6094		-41251.7	154.41	158.23
2012-12-19 08:38:40	10.6163		-41251.7	154.62	158.49
2012-12-19 08:48:40	10.6233		-41251.7	154.84	158.72
2012-12-19 08:58:40	10.6302		-41251.7	155.06	158.94
2012-12-19 09:08:40	10.6372		-41251.7	155.27	159.16
2012-12-19 09:18:40	10.6441		-41251.7	155.47	159.37
2012-12-19 09:28:40	10.6511		-41251.7	155.67	159.59
2012-12-19 09:38:40	10.658		-41251.7	155.89	159.82
2012-12-19 09:48:40	10.665		-41251.7	156.09	160.04
2012-12-19 09:58:40	10.6719		-41251.7	156.3	160.24
2012-12-19 10:08:40	10.6788		-41251.7	156.49	160.47
2012-12-19 10:18:40	10.6858		-41251.7	156.67	160.68
2012-12-19 10:28:40	10.6927		-41251.7	156.85	160.89
2012-12-19 10:38:40	10.6997		-41251.7	157.04	161.03
2012-12-19 10:48:40	10.7066		-41251.7	157.25	161.28
2012-12-19 10:58:40	10.7136		-41251.7	157.45	161.47
2012-12-19 11:08:40	10.7205		-41251.7	157.6	161.7
2012-12-19 11:18:40	10.7275		-41251.7	157.82	161.88
2012-12-19 11:28:40	10.7344		-41251.7	157.97	162.07
2012-12-19 11:38:40	10.7413		-41251.7	158.18	162.31
2012-12-19 11:48:40	10.7483		-41251.7	158.36	162.51
2012-12-19 11:58:40	10.7552		-41251.7	158.55	162.72
2012-12-19 12:08:40	10.7622		-41251.7	158.74	162.87
2012-12-19 12:18:40	10.7691		-41251.7	158.91	163.08
2012-12-19 12:28:40	10.7761		-41251.7	159.06	163.24
2012-12-19 12:38:40	10.783		-41251.7	159.15	163.43
2012-12-19 12:48:40	10.79		-41251.7	159.42	163.63
2012-12-19 12:58:40	10.7969		-41251.7	159.71	163.92
2012-12-19 13:08:40	10.8038		-41251.7	159.88	164.15
2012-12-19 13:18:40	10.8108		-41251.7	160.05	164.31
2012-12-19 13:28:40	10.8177		-41251.7	160.22	164.52
2012-12-19 13:38:40	10.8247		-41251.7	160.37	164.73
2012-12-19 13:48:40	10.8316		-41251.7	160.52	164.9
2012-12-19 13:58:40	10.8386		-41251.7	160.72	165.11
2012-12-19 14:08:40	10.8455		-41251.7	160.9	165.33
2012-12-19 14:18:40	10.8525		-41251.7	161.08	165.53
2012-12-19 14:28:40	10.8594		-41251.7	161.26	165.72
2012-12-19 14:38:40	10.8663		-41251.7	161.42	165.87
2012-12-19 14:48:40	10.8733		-41251.7	161.57	166.07
2012-12-19 14:58:40	10.8802		-41251.7	161.75	166.3
2012-12-19 15:08:40	10.8872		-41251.7	161.9	166.49
2012-12-19 15:18:40	10.8941		-41251.7	162.07	166.69
2012-12-19 15:28:40	10.9011		-41251.7	162.25	166.86
2012-12-19 15:38:40	10.908		-41251.7	162.39	167.05
2012-12-19 15:48:40	10.915		-41251.7	162.56	167.27
2012-12-19 15:58:40	10.9219		-41251.7	161.93	167.42
2012-12-19 16:08:40	10.9288		-41251.7	162.9	167.62
2012-12-19 16:18:40	10.9358		-41251.7	163.05	167.82
2012-12-19 16:28:40	10.9427		-41251.7	163.2	168.01
2012-12-19 16:38:40	10.9497		-41251.7	163.4	168.23
2012-12-19 16:48:40	10.9566		-41251.7	163.36	168.3
2012-12-19 16:58:40	10.9636		-41251.7	163.62	168.54
2012-12-19 17:08:40	10.9705		-41251.7	163.77	168.74
2012-12-19 17:18:40	10.9775		-41251.7	163.99	168.95
2012-12-19 17:28:40	10.9844		-41251.7	164.16	169.16
2012-12-19 17:38:40	10.9913		-41251.7	164.33	169.38
2012-12-19 17:48:40	10.9983		-41251.7	164.49	169.57
2012-12-19 17:58:40	11.0052		-41251.7	164.68	169.78
2012-12-19 18:08:40	11.0122		-41251.7	164.82	169.98
2012-12-19 18:18:40	11.0191		-41251.7	165	170.22
2012-12-19 18:28:40	11.0261		-41251.7	165.15	170.41
2012-12-19 18:38:40	11.033		-41251.7	165.33	170.63
2012-12-19 18:48:40	11.04		-41251.7	165.49	170.82
2012-12-19 18:58:40	11.0469		-41251.7	165.64	171.04
2012-12-19 19:08:40	11.0538		-41251.7	165.83	171.27
2012-12-19 19:18:40	11.0608		-41251.7	165.98	171.48
2012-12-19 19:28:40	11.0677		-41251.7	166.16	171.7
2012-12-19 19:38:40	11.0747		-41251.7	166.35	171.93
2012-12-19 19:48:40	11.0816		-41251.7	166.52	172.13
2012-12-19 19:58:40	11.0886		-41251.7	166.7	172.3
2012-12-19 20:08:40	11.0955		-41251.7	166.87	172.57
2012-12-19 20:18:40	11.1025		-41251.7	167.03	172.8
2012-12-19 20:28:40	11.1094		-41251.7	167.21	172.99
2012-12-19 20:38:40	11.1163		-41251.7	167.38	173.19
2012-12-19 20:48:40	11.1233		-41251.7	167.54	173.43
2012-12-19 20:58:40	11.1302		-41251.7	167.68	173.62
2012-12-19 21:08:40	11.1372		-41251.7	167.85	173.87
2012-12-19 21:18:40	11.1441		-41251.7	168.02	174.07
2012-12-19 21:28:40	11.1511		-41251.7	168.2	174.27
2012-12-19 21:38:40	11.158		-41251.7	168.36	174.46
2012-12-19 21:48:40	11.165		-41251.7	168.54	174.7
2012-12-19 21:58:40	11.1719		-41251.7	168.71	174.91
2012-12-19 22:08:40	11.1788		-41251.7	168.89	175.1
2012-12-19 22:18:40	11.1858		-41251.7	169.05	175.31
2012-12-19 22:28:40	11.1927		-41251.7	169.2	175.54
2012-12-19 22:38:40	11.1997		-41251.7	169.35	175.75
2012-12-19 22:48:40	11.2066		-41251.7	169.52	175.96
2012-12-19 22:58:40	11.2136		-41251.7	169.69	176.17
2012-12-19 23:08:40	11.2205		-41251.7	169.86	176.32
2012-12-19 23:18:40	11.2275		-41251.7	169.98	176.52
2012-12-19 23:28:40	11.2344		-41251.7	170.15	176.72
2012-12-19 23:38:40	11.2413		-41251.7	170.29	176.92
2012-12-19 23:48:40	11.2483		-41251.7	170.45	177.13
2012-12-19 23:58:40	11.2552		-41251.7	170.6	177.31
2012-12-20 00:08:40	11.2622		-41251.7	170.73	177.53
2012-12-20 00:18:40	11.2691		-41251.7	170.9	177.67
2012-12-20 00:28:40	11.2761		-41251.7	170.97	177.98
2012-12-20 00:38:40	11.283		-41251.7	171.2	178.2
2012-12-20 00:48:40	11.29		-41251.7	171.37	178.4
2012-12-20 00:58:40	11.2969		-41251.7	171.54	178.62
2012-12-20 01:08:40	11.3038		-41251.7	171.69	178.82
2012-12-20 01:18:40	11.3108		-41251.7	171.84	179.03
2012-12-20 01:28:40	11.3177		-41251.7	172	179.24
2012-12-20 01:38:40	11.3247		-41251.7	172.18	179.46
2012-12-20 01:48:40	11.3316		-41251.7	172.17	179.65
2012-12-20 01:58:40	11.3386		-41251.7	172.48	179.92
2012-12-20 02:08:40	11.3455		-41251.7	172.62	180.11
2012-12-20 02:18:40	11.3525		-41251.7	172.78	180.31
2012-12-20 02:28:40	11.3594		-41251.7	172.95	180.51
2012-12-20 02:38:40	11.3663		-41251.7	172.99	180.73
2012-12-20 02:48:40	11.3733		-41251.7	173.25	180.91
2012-12-20 02:58:40	11.3802		-41251.7	173.4	181.09
2012-12-20 03:08:40	11.3872		-41251.7	173.56	181.37
2012-12-20 03:18:40	11.3941		-41251.7	173.71	181.58
2012-12-20 03:28:40	11.4011		-41251.7	173.85	181.79
2012-12-20 03:38:40	11.408		-41251.7	174.03	182.02
2012-12-20 03:48:40	11.415		-41251.7	174.15	182.2
2012-12-20 03:58:40	11.4219		-41251.7	174.32	182.41
2012-12-20 04:08:40	11.4288		-41251.7	174.44	182.63
2012-12-20 04:18:40	11.4358		-41251.7	174.61	182.87
2012-12-20 04:28:40	11.4427		-41251.7	174.77	183.09
2012-12-20 04:38:40	11.4497		-41251.7	174.93	183.3
2012-12-20 04:48:40	11.4566		-41251.7	175.07	183.49
2012-12-20 04:58:40	11.4636		-41251.7	175.19	183.69
2012-12-20 05:08:40	11.4705		-41251.7	175.37	183.9
2012-12-20 05:18:40	11.4775		-41251.7	175.51	184.13
2012-12-20 05:28:40	11.4844		-41251.7	175.69	184.35
2012-12-20 05:38:40	11.4913		-41251.7	175.82	184.57
2012-12-20 05:48:40	11.4983		-41251.7	175.95	184.75
2012-12-20 05:58:40	11.5052		-41251.7	176.14	185
2012-12-20 06:08:40	11.5122		-41251.7	176.26	185.19
2012-12-20 06:18:40	11.5191		-41251.7	176.39	185.45
2012-12-20 06:28:40	11.5261		-41251.7	176.56	185.65
2012-12-20 06:38:40	11.533		-41251.7	176.69	185.87
2012-12-20 06:48:40	11.54		-41251.7	176.84	186.08
2012-12-20 06:58:40	11.5469		-41251.7	177.03	186.27
2012-12-20 07:08:40	11.5538		-41251.7	177.18	186.46
2012-12-20 07:18:40	11.5608		-41251.7	177.27	186.68
2012-12-20 07:28:40	11.5677		-41251.7	177.46	186.86
2012-12-20 07:38:40	11.5747		-41251.7	177.58	187
2012-12-20 07:48:40	11.5816		-41251.7	177.71	187.15
2012-12-20 07:58:40	11.5886		-41251.7	177.81	187.37
2012-12-20 08:08:40	11.5955		-41251.7	177.97	187.53
2012-12-20 08:18:40	11.6025		-41251.7	178.08	187.69
2012-12-20 08:28:40	11.6094		-41251.7	175.57	187.3
2012-12-20 08:38:40	11.6163		-41251.7	178.22	188.04
2012-12-20 08:48:40	11.6233		-41251.7	178.48	188.27
2012-12-20 08:58:40	11.6302		-41251.7	178.67	188.49
2012-12-20 09:08:40	11.6372		-41251.7	178.8	188.7
2012-12-20 09:18:40	11.6441		-41251.7	178.98	188.91
2012-12-20 09:28:40	11.6511		-41251.7	178.86	189.14
2012-12-20 09:38:40	11.658		-41251.7	179.35	189.36
2012-12-20 09:48:40	11.665		-41251.7	179.51	189.61
2012-12-20 09:58:40	11.6719		-41251.7	179.66	189.81
2012-12-20 10:08:40	11.6788		-41251.7	179.84	190.06
2012-12-20 10:18:40	11.6858		-41251.7	180.01	190.24
2012-12-20 10:28:40	11.6927		-41251.7	180.14	190.49
2012-12-20 10:38:40	11.6997		-41251.7	180.44	190.87
2012-12-20 10:48:40	11.7066		-41251.7	180.42	191.1
2012-12-20 10:58:40	11.7136		-41251.7	180.73	191.29
2012-12-20 11:08:40	11.7205		-41251.7	180.89	191.49
2012-12-20 11:18:40	11.7275		-41251.7	180.95	191.68
2012-12-20 11:28:40	11.7344		-41251.7	181.08	191.88
2012-12-20 11:38:40	11.7413		-41251.7	180.68	192.04
2012-12-20 11:48:40	11.7483		-41251.7	181.38	192.31
2012-12-20 11:58:40	11.7552		-41251.7	181.56	192.56
2012-12-20 12:08:40	11.7622		-41251.7	180.14	192.63
2012-12-20 12:18:40	11.7691		-41251.7	181.47	192.69
2012-12-20 12:28:40	11.7761		-41251.7	181.53	193.03
2012-12-20 12:38:40	11.783		-41251.7	181.94	193.29
2012-12-20 12:48:40	11.79		-41251.7	182.07	193.55
2012-12-20 12:58:40	11.7969		-41251.7	182.38	193.8
2012-12-20 13:08:40	11.8038		-41251.7	182.59	194.11
2012-12-20 13:18:40	11.8108		-41251.7	182.77	194.33
2012-12-20 13:28:40	11.8177		-41251.7	182.82	194.57
2012-12-20 13:38:40	11.8247		-41251.7	183.29	195.06
2012-12-20 13:48:40	11.8316		-41251.7	183.51	195.34
2012-12-20 13:58:40	11.8386		-41251.7	183.56	195.54
2012-12-20 14:08:40	11.8455		-41251.7	183.81	195.8
2012-12-20 14:18:40	11.8525		-41251.7	184.03	196.1
2012-12-20 14:28:40	11.8594		-41251.7	184.19	196.34
2012-12-20 14:38:40	11.8663		-41251.7	184.37	196.56
2012-12-20 14:48:40	11.8733		-41251.7	184.57	196.85
2012-12-20 14:58:40	11.8802		-41251.7	184.77	197.05
2012-12-20 15:08:40	11.8872		-41251.7	184.91	197.32
2012-12-20 15:18:40	11.8941		-41251.7	185.09	197.58
2012-12-20 15:28:40	11.9011		-41251.7	185.27	197.82
2012-12-20 15:38:40	11.908		-41251.7	185.46	198.03
2012-12-20 15:48:40	11.915		-41251.7	185.66	198.35
2012-12-20 15:58:40	11.9219		-41251.7	185.81	198.57
2012-12-20 16:08:40	11.9288		-41251.7	185.92	198.83
2012-12-20 16:18:40	11.9358		-41251.7	186.2	198.98
2012-12-20 16:28:40	11.9427		-41251.7	186.31	199.26
2012-12-20 16:38:40	11.9497		-41251.7	186.4	199.53
2012-12-20 16:48:40	11.9566		-41251.7	186.64	199.8
2012-12-20 16:58:40	11.9636		-41251.7	186.85	200.04
2012-12-20 17:08:40	11.9705		-41251.7	186.98	200.3
2012-12-20 17:18:40	11.9775		-41251.7	187.01	200.49
2012-12-20 17:28:40	11.9844		-41251.7	184.32	199.31
2012-12-20 17:38:40	11.9913		-41251.7	187.14	200.63
2012-12-20 17:48:40	11.9983		-41251.7	187.39	200.92
2012-12-20 17:58:40	12.0052		-41251.7	187.72	201.21
2012-12-20 18:08:40	12.0122		-41251.7	187.94	201.49
2012-12-20 18:18:40	12.0191		-41251.7	188.14	201.75
2012-12-20 18:28:40	12.0261		-41251.7	187.88	202.06
2012-12-20 18:38:40	12.033		-41251.7	188.48	202.31
2012-12-20 18:48:40	12.04		-41251.7	188.73	202.57
2012-12-20 18:58:40	12.0469		-41251.7	188.97	202.81
2012-12-20 19:08:40	12.0538		-41251.7	189.18	203.06
2012-12-20 19:18:40	12.0608		-41251.7	189.32	203.32
2012-12-20 19:28:40	12.0677		-41251.7	189.5	203.56
2012-12-20 19:38:40	12.0747		-41251.7	189.68	203.82
2012-12-20 19:48:40	12.0816		-41251.7	189.88	204.09
2012-12-20 19:58:40	12.0886		-41251.7	190.09	204.29
2012-12-20 20:08:40	12.0955		-41251.7	190.21	204.56
2012-12-20 20:18:40	12.1025		-41251.7	190.46	204.86
2012-12-20 20:28:40	12.1094		-41251.7	190.61	205.11
2012-12-20 20:38:40	12.1163		-41251.7	190.85	205.36
2012-12-20 20:48:40	12.1233		-41251.7	191.05	205.63
2012-12-20 20:58:40	12.1302		-41251.7	191.22	205.89
2012-12-20 21:08:40	12.1372		-41251.7	191.41	206.14
2012-12-20 21:18:40	12.1441		-41251.7	191.6	206.42
2012-12-20 21:28:40	12.1511		-41251.7	191.8	206.67
2012-12-20 21:38:40	12.158		-41251.7	191.99	206.93
2012-12-20 21:48:40	12.165		-41251.7	192.18	207.18
2012-12-20 21:58:40	12.1719		-41251.7	192.39	207.46
2012-12-20 22:08:40	12.1788		-41251.7	192.55	207.71
2012-12-20 22:18:40	12.1858		-41251.7	192.72	207.96
2012-12-20 22:28:40	12.1927		-41251.7	192.94	208.23
2012-12-20 22:38:40	12.1997		-41251.7	193.13	208.5
2012-12-20 22:48:40	12.2066		-41251.7	193.33	208.74
2012-12-20 22:58:40	12.2136		-41251.7	193.4	209
2012-12-20 23:08:40	12.2205		-41251.7	193.7	209.25
2012-12-20 23:18:40	12.2275		-41251.7	193.97	209.53
2012-12-20 23:28:40	12.2344		-41251.7	194.19	209.81
2012-12-20 23:38:40	12.2413		-41251.7	194.39	210.08
2012-12-20 23:48:40	12.2483		-41251.7	194.54	210.34
2012-12-20 23:58:40	12.2552		-41251.7	194.82	210.61
2012-12-21 00:08:40	12.2622		-41251.7	195	210.89
2012-12-21 00:18:40	12.2691		-41251.7	195.2	211.15
2012-12-21 00:28:40	12.2761		-41251.7	195.36	211.43
2012-12-21 00:38:40	12.283		-41251.7	195.52	211.7
2012-12-21 00:48:40	12.29		-41251.7	195.71	211.97
2012-12-21 00:58:40	12.2969		-41251.7	195.96	212.24
2012-12-21 01:08:40	12.3038		-41251.7	196.17	212.5
2012-12-21 01:18:40	12.3108		-41251.7	196.41	212.75
2012-12-21 01:28:40	12.3177		-41251.7	196.61	213.11
2012-12-21 01:38:40	12.3247		-41251.7	196.6	213.4
2012-12-21 01:48:40	12.3316		-41251.7	196.97	213.5
2012-12-21 01:58:40	12.3386		-41251.7	197.12	213.81
2012-12-21 02:08:40	12.3455		-41251.7	197.32	214.14
2012-12-21 02:18:40	12.3525		-41251.7	197.55	214.43
2012-12-21 02:28:40	12.3594		-41251.7	197.81	214.85
2012-12-21 02:38:40	12.3663		-41251.7	198.2	215.18
2012-12-21 02:48:40	12.3733		-41251.7	198.4	215.46
2012-12-21 02:58:40	12.3802		-41251.7	198.59	215.71
2012-12-21 03:08:40	12.3872		-41251.7	198.7	216.09
2012-12-21 03:18:40	12.3941		-41251.7	199.01	216.37
2012-12-21 03:28:40	12.4011		-41251.7	198.91	216.68
2012-12-21 03:38:40	12.408		-41251.7	199.32	216.88
2012-12-21 03:48:40	12.415		-41251.7	199.54	217.33
2012-12-21 03:58:40	12.4219		-41251.7	199.78	217.62
2012-12-21 04:08:40	12.4288		-41251.7	200.05	217.9
2012-12-21 04:18:40	12.4358		-41251.7	200.32	218.26
2012-12-21 04:28:40	12.4427		-41251.7	200.45	218.48
2012-12-21 04:38:40	12.4497		-41251.7	200.75	218.91
2012-12-21 04:48:40	12.4566		-41251.7	200.99	219.25
2012-12-21 04:58:40	12.4636		-41251.7	201.18	219.57
2012-12-21 05:08:40	12.4705		-41251.7	201.45	219.88
2012-12-21 05:18:40	12.4775		-41251.7	201.46	220.25
2012-12-21 05:28:40	12.4844		-41251.7	201.91	220.59
2012-12-21 05:38:40	12.4913		-41251.7	202.12	220.9
2012-12-21 05:48:40	12.4983		-41251.7	202.22	221.2
2012-12-21 05:58:40	12.5052		-41251.7	202.44	221.43
2012-12-21 06:08:40	12.5122		-41251.7	202.81	221.89
2012-12-21 06:18:40	12.5191		-41251.7	202.74	222.09
2012-12-21 06:28:40	12.5261		-41251.7	203.02	222.57
2012-12-21 06:38:40	12.533		-41251.7	203.3	222.94
2012-12-21 06:48:40	12.54		-41251.7	203.48	223.27
2012-12-21 06:58:40	12.5469		-41251.7	203.73	223.62
2012-12-21 07:08:40	12.5538		-41251.7	203.94	223.98
2012-12-21 07:18:40	12.5608		-41251.7	204.28	224.31
2012-12-21 07:28:40	12.5677		-41251.7	204.21	224.7
2012-12-21 07:38:40	12.5747		-41251.7	204.53	225.07
2012-12-21 07:48:40	12.5816		-41251.7	204.87	225.41
2012-12-21 07:58:40	12.5886		-41251.7	205.11	225.67
2012-12-21 08:08:40	12.5955		-41251.7	205.33	225.88
2012-12-21 08:18:40	12.6025		-41251.7	189.06	222.01
2012-12-21 08:28:40	12.6094		-41251.7	202.91	225.67
2012-12-21 08:38:40	12.6163		-41251.7	205.38	226.55
2012-12-21 08:48:40	12.6233		-41251.7	205.86	227.03
2012-12-21 08:58:40	12.6302		-41251.7	206.25	227.43
2012-12-21 09:08:40	12.6372		-41251.7	206.6	227.91
2012-12-21 09:18:40	12.6441		-41251.7	206.93	228.33
2012-12-21 09:28:40	12.6511		-41251.7	207.15	228.75
2012-12-21 09:38:40	12.658		-41251.7	207.38	229.13
2012-12-21 09:48:40	12.665		-41251.7	207.68	229.56
2012-12-21 09:58:40	12.6719		-41251.7	207.97	229.9
2012-12-21 10:08:40	12.6788		-41251.7	208.19	230.3
2012-12-21 10:18:40	12.6858		-41251.7	208.47	230.68
2012-12-21 10:28:40	12.6927		-41251.7	208.81	231.12
2012-12-21 10:38:40	12.6997		-41251.7	209.07	231.55
2012-12-21 10:48:40	12.7066		-41251.7	209.42	231.94
2012-12-21 10:58:40	12.7136		-41251.7	209.63	232.33
2012-12-21 11:08:40	12.7205		-41251.7	210.14	232.73
2012-12-21 11:18:40	12.7275		-41251.7	210.21	233.09
2012-12-21 11:28:40	12.7344		-41251.7	210.5	233.53
2012-12-21 11:38:40	12.7413		-41251.7	210.82	233.91
2012-12-21 11:48:40	12.7483		-41251.7	211.05	234.33
2012-12-21 11:58:40	12.7552		-41251.7	211.34	234.77
2012-12-21 12:08:40	12.7622		-41251.7	211.84	235.23
2012-12-21 12:18:40	12.7691		-41251.7	212.22	235.64
2012-12-21 12:28:40	12.7761		-41251.7	212.38	236.05
2012-12-21 12:38:40	12.783		-41251.7	212.67	236.51
2012-12-21 12:48:40	12.79		-41251.7	212.89	236.9
2012-12-21 12:58:40	12.7969		-41251.7	213.26	237.39
2012-12-21 13:08:40	12.8038		-41251.7	213.57	237.77
2012-12-21 13:18:40	12.8108		-41251.7	213.86	238.06
2012-12-21 13:28:40	12.8177		-41251.7	214.1	238.58
2012-12-21 13:38:40	12.8247		-41251.7	214.32	239.12
2012-12-21 13:48:40	12.8316		-41251.7	214.44	239.51
2012-12-21 13:58:40	12.8386		-41251.7	214.86	239.88
2012-12-21 14:08:40	12.8455		-41251.7	215.22	240.4
2012-12-21 14:18:40	12.8525		-41251.7	215.5	240.91
2012-12-21 14:28:40	12.8594		-41251.7	215.84	241.38
2012-12-21 14:38:40	12.8663		-41251.7	216.08	241.77
2012-12-21 14:48:40	12.8733		-41251.7	216.37	242.28
2012-12-21 14:58:40	12.8802		-41251.7	216.62	242.79
2012-12-21 15:08:40	12.8872		-41251.7	217.11	243.26
2012-12-21 15:18:40	12.8941		-41251.7	217.42	243.77
2012-12-21 15:28:40	12.9011		-41251.7	217.85	244.3
2012-12-21 15:38:40	12.908		-41251.7	218.01	244.72
2012-12-21 15:48:40	12.915		-41251.7	218.47	245.23
2012-12-21 15:58:40	12.9219		-41251.7	218.88	245.76
2012-12-21 16:08:40	12.9288		-41251.7	219.08	246.26
2012-12-21 16:18:40	12.9358		-41251.7	219.3	246.84
2012-12-21 16:28:40	12.9427		-41251.7	219.62	247.36
2012-12-21 16:38:40	12.9497		-41251.7	219.94	247.83
2012-12-21 16:48:40	12.9566		-41251.7	220.16	248.26
2012-12-21 16:58:40	12.9636		-41251.7	220.33	248.89
2012-12-21 17:08:40	12.9705		-41251.7	221	249.48
2012-12-21 17:18:40	12.9775		-41251.7	221.36	249.96
2012-12-21 17:28:40	12.9844		-41251.7	221.32	250.55
2012-12-21 17:38:40	12.9913		-41251.7	221.95	251.18
2012-12-21 17:48:40	12.9983		-41251.7	222.33	251.74
2012-12-21 17:58:40	13.0052		-41251.7	222.75	252.19
2012-12-21 18:08:40	13.0122		-41251.7	223.01	252.81
2012-12-21 18:18:40	13.0191		-41251.7	223.61	253.42
2012-12-21 18:28:40	13.0261		-41251.7	223.74	253.99
2012-12-21 18:38:40	13.033		-41251.7	220.1	252.33
2012-12-21 18:48:40	13.04		-41251.7	223.89	254.27
2012-12-21 18:58:40	13.0469		-41251.7	224.71	255.07
2012-12-21 19:08:40	13.0538		-41251.7	225.26	255.85
2012-12-21 19:18:40	13.0608		-41251.7	225.71	256.49
2012-12-21 19:28:40	13.0677		-41251.7	226.18	257.1
2012-12-21 19:38:40	13.0747		-41251.7	226.18	257.75
2012-12-21 19:48:40	13.0816		-41251.7	226.72	258.39
2012-12-21 19:58:40	13.0886		-41251.7	227.33	259.1
2012-12-21 20:08:40	13.0955		-41251.7	227.89	259.73
2012-12-21 20:18:40	13.1025		-41251.7	228.41	260.29
2012-12-21 20:28:40	13.1094		-41251.7	228.71	260.88
2012-12-21 20:38:40	13.1163		-41251.7	229.1	261.52
2012-12-21 20:48:40	13.1233		-41251.7	229.64	262.16
2012-12-21 20:58:40	13.1302		-41251.7	229.93	262.8
2012-12-21 21:08:40	13.1372		-41251.7	230.4	263.53
2012-12-21 21:18:40	13.1441		-41251.7	230.91	264.17
2012-12-21 21:28:40	13.1511		-41251.7	231.15	264.83
2012-12-21 21:38:40	13.158		-41251.7	231.2	265.51
2012-12-21 21:48:40	13.165		-41251.7	231.92	266.18
2012-12-21 21:58:40	13.1719		-41251.7	232.57	266.77
2012-12-21 22:08:40	13.1788		-41251.7	233.05	267.62
2012-12-21 22:18:40	13.1858		-41251.7	233.42	268.3
2012-12-21 22:28:40	13.1927		-41251.7	233.88	268.98
2012-12-21 22:38:40	13.1997		-41251.7	234.25	269.7
2012-12-21 22:48:40	13.2066		-41251.7	234.68	270.29
2012-12-21 22:58:40	13.2136		-41251.7	235.23	271.21
2012-12-21 23:08:40	13.2205		-41251.7	235.61	271.65
2012-12-21 23:18:40	13.2275		-41251.7	236.01	272.46
2012-12-21 23:28:40	13.2344		-41251.7	236.36	273.37
2012-12-21 23:38:40	13.2413		-41251.7	236.91	274.06
2012-12-21 23:48:40	13.2483		-41251.7	237.34	274.78
2012-12-21 23:58:40	13.2552		-41251.7	237.89	275.61
2012-12-22 00:08:40	13.2622		-41251.7	238.31	276.35
2012-12-22 00:18:40	13.2691		-41251.7	238.7	277.01
2012-12-22 00:28:40	13.2761		-41251.7	239.31	277.9
2012-12-22 00:38:40	13.283		-41251.7	239.79	278.63
2012-12-22 00:48:40	13.29		-41251.7	240.27	279.32
2012-12-22 00:58:40	13.2969		-41251.7	240.73	280.06
2012-12-22 01:08:40	13.3038		-41251.7	241.04	280.92
2012-12-22 01:18:40	13.3108		-41251.7	241.45	281.75
2012-12-22 01:28:40	13.3177		-41251.7	242	282.54
2012-12-22 01:38:40	13.3247		-41251.7	242.56	283.41
2012-12-22 01:48:40	13.3316		-41251.7	243.21	284.51
2012-12-22 01:58:40	13.3386		-41251.7	243.78	285.27
2012-12-22 02:08:40	13.3455		-41251.7	244.37	286.14
2012-12-22 02:18:40	13.3525		-41251.7	245	286.99
2012-12-22 02:28:40	13.3594		-41251.7	245.54	287.83
2012-12-22 02:38:40	13.3663		-41251.7	245.93	288.66
2012-12-22 02:48:40	13.3733		-41251.7	246.42	289.59
2012-12-22 02:58:40	13.3802		-41251.7	246.83	290.43
2012-12-22 03:08:40	13.3872		-41251.7	247.59	291.11
2012-12-22 03:18:40	13.3941		-41251.7	248.21	292.03
2012-12-22 03:28:40	13.4011		-41251.7	248.81	292.85
2012-12-22 03:38:40	13.408		-41251.7	249.37	293.85
2012-12-22 03:48:40	13.415		-41251.7	249.79	294.7
2012-12-22 03:58:40	13.4219		-41251.7	250.02	295.61
2012-12-22 04:08:40	13.4288		-41251.7	250.81	296.5
2012-12-22 04:18:40	13.4358		-41251.7	251.17	297.31
2012-12-22 04:28:40	13.4427		-41251.7	251.79	298.33
2012-12-22 04:38:40	13.4497		-41251.7	252.3	299.32
2012-12-22 04:48:40	13.4566		-41251.7	252.9	300.22
2012-12-22 04:58:40	13.4636		-41251.7	253.64	301.05
2012-12-22 05:08:40	13.4705		-41251.7	254.36	301.94
2012-12-22 05:18:40	13.4775		-41251.7	254.95	303.03
2012-12-22 05:28:40	13.4844		-41251.7	255.66	303.95
2012-12-22 05:38:40	13.4913		-41251.7	256.12	304.94
2012-12-22 05:48:40	13.4983		-41251.7	256.86	306.06
2012-12-22 05:58:40	13.5052		-41251.7	257.48	307
2012-12-22 06:08:40	13.5122		-41251.7	257.84	307.89
2012-12-22 06:18:40	13.5191		-41251.7	258.32	308.99
2012-12-22 06:28:40	13.5261		-41251.7	259.16	310.02
2012-12-22 06:38:40	13.533		-41251.7	259.9	311.09
2012-12-22 06:48:40	13.54		-41251.7	260.48	312.16
2012-12-22 06:58:40	13.5469		-41251.7	261.04	313.06
2012-12-22 07:08:40	13.5538		-41251.7	261.67	314.22
2012-12-22 07:18:40	13.5608		-41251.7	262.38	315.23
2012-12-22 07:28:40	13.5677		-41251.7	263.03	316.42
2012-12-22 07:38:40	13.5747		-41251.7	263.77	317.5
2012-12-22 07:48:40	13.5816		-41251.7	264.31	318.38
2012-12-22 07:58:40	13.5886		-41251.7	264.92	319.42
2012-12-22 08:08:40	13.5955		-41251.7	265.68	320.72
2012-12-22 08:18:40	13.6025		-41251.7	266.23	321.81
2012-12-22 08:28:40	13.6094		-41251.7	266.99	323
2012-12-22 08:38:40	13.6163		-41251.7	267.73	324.12
2012-12-22 08:48:40	13.6233		-41251.7	268.46	325.34
2012-12-22 08:58:40	13.6302		-41251.7	269.13	326
2012-12-22 09:08:40	13.6372		-41251.7	269.75	327.33
2012-12-22 09:18:40	13.6441		-41251.7	270.2	328.59
2012-12-22 09:28:40	13.6511		-41251.7	270.95	329.71
2012-12-22 09:38:40	13.658		-41251.7	271.43	330.87
2012-12-22 09:48:40	13.665		-41251.7	272.6	332.08
2012-12-22 09:58:40	13.6719		-41251.7	265.87	329.02
2012-12-22 10:08:40	13.6788		-41251.7	271.64	333.16
2012-12-22 10:18:40	13.6858		-41251.7	273.85	334.84
2012-12-22 10:28:40	13.6927		-41251.7	274.98	336.02
2012-12-22 10:38:40	13.6997		-41251.7	276.11	336.7
2012-12-22 10:48:40	13.7066		-41251.7	277.25	338.78
2012-12-22 10:58:40	13.7136		-41251.7	278.33	340.14
2012-12-22 11:08:40	13.7205		-41251.7	278.95	341.49
2012-12-22 11:18:40	13.7275		-41251.7	279.91	342.84
2012-12-22 11:28:40	13.7344		-41251.7	280.8	343.9
2012-12-22 11:38:40	13.7413		-41251.7	281.72	345.45
2012-12-22 11:48:40	13.7483		-41251.7	282.68	346.74
2012-12-22 11:58:40	13.7552		-41251.7	283.15	348.31
2012-12-22 12:08:40	13.7622		-41251.7	284.47	349.68
2012-12-22 12:18:40	13.7691		-41251.7	285.46	351.13
2012-12-22 12:28:40	13.7761		-41251.7	286.36	352.19
2012-12-22 12:38:40	13.783		-41251.7	287.26	353.61
2012-12-22 12:48:40	13.79		-41251.7	288.28	355.27
2012-12-22 12:58:40	13.7969		-41251.7	288.93	356.63
2012-12-22 13:08:40	13.8038		-41251.7	289.86	357.95
2012-12-22 13:18:40	13.8108		-41251.7	290.87	359.42
2012-12-22 13:28:40	13.8177		-41251.7	291.41	360.84
2012-12-22 13:38:40	13.8247		-41251.7	292.32	362.37
2012-12-22 13:48:40	13.8316		-41251.7	293.15	363.74
2012-12-22 13:58:40	13.8386		-41251.7	293.21	365.22
2012-12-22 14:08:40	13.8455		-41251.7	294.73	366.44
2012-12-22 14:18:40	13.8525		-41251.7	295.63	368.06
2012-12-22 14:28:40	13.8594		-41251.7	296.9	369.69
2012-12-22 14:38:40	13.8663		-41251.7	297.75	371.36
2012-12-22 14:48:40	13.8733		-41251.7	298.74	372.97
2012-12-22 14:58:40	13.8802		-41251.7	299.55	374.46
2012-12-22 15:08:40	13.8872		-41251.7	299.93	376.19
2012-12-22 15:18:40	13.8941		-41251.7	301.62	377.48
2012-12-22 15:28:40	13.9011		-41251.7	301.54	378.81
2012-12-22 15:38:40	13.908		-41251.7	303.64	380.45
2012-12-22 15:48:40	13.915		-41251.7	304.66	382.01
2012-12-22 15:58:40	13.9219		-41251.7	305.68	383.95
2012-12-22 16:08:40	13.9288		-41251.7	306.12	385.57
2012-12-22 16:18:40	13.9358		-41251.7	307.25	387.29
2012-12-22 16:28:40	13.9427		-41251.7	308.47	389.23
2012-12-22 16:38:40	13.9497		-41251.7	309.62	390.77
2012-12-22 16:48:40	13.9566		-41251.7	310.43	392.68
2012-12-22 16:58:40	13.9636		-41251.7	311.8	393.44
2012-12-22 17:08:40	13.9705		-41251.7	312.83	396.02
2012-12-22 17:18:40	13.9775		-41251.7	313.75	397.78
2012-12-22 17:28:40	13.9844		-41251.7	314.31	399.37
2012-12-22 17:38:40	13.9913		-41251.7	313.98	401.34
2012-12-22 17:48:40	13.9983		-41251.7	316.84	402.92
2012-12-22 17:58:40	14.0052		-41251.7	318.44	404.99
2012-12-22 18:08:40	14.0122		-41251.7	319.6	407.32
2012-12-22 18:18:40	14.0191		-41251.7	320.77	408.89
2012-12-22 18:28:40	14.0261		-41251.7	321.15	410.73
2012-12-22 18:38:40	14.033		-41251.7	322.36	412.72
2012-12-22 18:48:40	14.04		-41251.7	323.9	414.78
2012-12-22 18:58:40	14.0469		-41251.7	325.22	416.89
2012-12-22 19:08:40	14.0538		-41251.7	326.53	418.62
2012-12-22 19:18:40	14.0608		-41251.7	326.64	420.43
2012-12-22 19:28:40	14.0677		-41251.7	317.82	415.22
2012-12-22 19:38:40	14.0747		-41251.7	326.92	422.38
2012-12-22 19:48:40	14.0816		-41251.7	330.67	425.2
2012-12-22 19:58:40	14.0886		-41251.7	333.09	427.85
2012-12-22 20:08:40	14.0955		-41251.7	334.68	429.27
2012-12-22 20:18:40	14.1025		-41251.7	336.38	432.36
2012-12-22 20:28:40	14.1094		-41251.7	337.93	434.32
2012-12-22 20:38:40	14.1163		-41251.7	339.58	436.36
2012-12-22 20:48:40	14.1233		-41251.7	340.83	438.68
2012-12-22 20:58:40	14.1302		-41251.7	342.24	440.75
2012-12-22 21:08:40	14.1372		-41251.7	343.95	443.21
2012-12-22 21:18:40	14.1441		-41251.7	345.34	445.17
2012-12-22 21:28:40	14.1511		-41251.7	346.65	447.19
2012-12-22 21:38:40	14.158		-41251.7	348.1	449.33
2012-12-22 21:48:40	14.165		-41251.7	349.61	451.63
2012-12-22 21:58:40	14.1719		-41251.7	351.03	453.9
2012-12-22 22:08:40	14.1788		-41251.7	352.22	456.16
2012-12-22 22:18:40	14.1858		-41251.7	354.28	459.15
2012-12-22 22:28:40	14.1927		-41251.7	355.94	461.35
2012-12-22 22:38:40	14.1997		-41251.7	357.35	463.33
2012-12-22 22:48:40	14.2066		-41251.7	358.82	465.95
2012-12-22 22:58:40	14.2136		-41251.7	360.25	468.15
2012-12-22 23:08:40	14.2205		-41251.7	361.87	470.51
2012-12-22 23:18:40	14.2275		-41251.7	363.48	472.72
2012-12-22 23:28:40	14.2344		-41251.7	364.73	475.57
2012-12-22 23:38:40	14.2413		-41251.7	366.03	477.6
2012-12-22 23:48:40	14.2483		-41251.7	367.14	479.85
2012-12-22 23:58:40	14.2552		-41251.7	368.77	482.78
2012-12-23 00:08:40	14.2622		-41251.7	370.32	485.36
2012-12-23 00:18:40	14.2691		-41251.7	371.57	487.53
2012-12-23 00:28:40	14.2761		-41251.7	372.99	489.6
2012-12-23 00:38:40	14.283		-41251.7	374.7	491.37
2012-12-23 00:48:40	14.29		-41251.7	376.47	494.79
2012-12-23 00:58:40	14.2969		-41251.7	377.75	497.1
2012-12-23 01:08:40	14.3038		-41251.7	379.47	499.83
2012-12-23 01:18:40	14.3108		-41251.7	381.18	502.91
2012-12-23 01:28:40	14.3177		-41251.7	382.62	505.34
2012-12-23 01:38:40	14.3247		-41251.7	384.46	508.06
2012-12-23 01:48:40	14.3316		-41251.7	386.01	510.27
2012-12-23 01:58:40	14.3386		-41251.7	387.08	513.15
2012-12-23 02:08:40	14.3455		-41251.7	388.82	515.55
2012-12-23 02:18:40	14.3525		-41251.7	391.02	518.32
2012-12-23 02:28:40	14.3594		-41251.7	392.65	521.16
2012-12-23 02:38:40	14.3663		-41251.7	394.27	524.63
2012-12-23 02:48:40	14.3733		-41251.7	395.97	526.99
2012-12-23 02:58:40	14.3802		-41251.7	397.54	530.4
2012-12-23 03:08:40	14.3872		-41251.7	399.38	532.9
2012-12-23 03:18:40	14.3941		-41251.7	400.31	535.92
2012-12-23 03:28:40	14.4011		-41251.7	402.57	539.25
2012-12-23 03:38:40	14.408		-41251.7	404.34	541.8
2012-12-23 03:48:40	14.415		-41251.7	406.11	544.78
2012-12-23 03:58:40	14.4219		-41251.7	408.11	547.45
2012-12-23 04:08:40	14.4288		-41251.7	409.02	550.23
2012-12-23 04:18:40	14.4358		-41251.7	411.01	553.33
2012-12-23 04:28:40	14.4427		-41251.7	413.11	556.99
2012-12-23 04:38:40	14.4497		-41251.7	415.47	560.02
2012-12-23 04:48:40	14.4566		-41251.7	417.67	563.72
2012-12-23 04:58:40	14.4636		-41251.7	419.34	566.39
2012-12-23 05:08:40	14.4705		-41251.7	421.41	569.53
2012-12-23 05:18:40	14.4775		-41251.7	423.61	572.3
2012-12-23 05:28:40	14.4844		-41251.7	425.62	575.85
2012-12-23 05:38:40	14.4913		-41251.7	427.77	579.18
2012-12-23 05:48:40	14.4983		-41251.7	430.01	582.01
2012-12-23 05:58:40	14.5052		-41251.7	431.6	585.91
2012-12-23 06:08:40	14.5122		-41251.7	434	588.82
2012-12-23 06:18:40	14.5191		-41251.7	435.41	592.88
2012-12-23 06:28:40	14.5261		-41251.7	437.79	596.91
2012-12-23 06:38:40	14.533		-41251.7	440.14	600.3
2012-12-23 06:48:40	14.54		-41251.7	442.47	603.93
2012-12-23 06:58:40	14.5469		-41251.7	441.23	607.36
2012-12-23 07:08:40	14.5538		-41251.7	446.71	611.1
2012-12-23 07:18:40	14.5608		-41251.7	448.28	614.42
2012-12-23 07:28:40	14.5677		-41251.7	450.85	618.52
2012-12-23 07:38:40	14.5747		-41251.7	452.53	622.33
2012-12-23 07:48:40	14.5816		-41251.7	455.27	625.66
2012-12-23 07:58:40	14.5886		-41251.7	457.85	628.3
2012-12-23 08:08:40	14.5955		-41251.7	459.99	632.13
2012-12-23 08:18:40	14.6025		-41251.7	461.92	633.89
[truncated: 1,180 more rows]
