# Supplementary material for: A pore-size classification for peat bogs derived from unsaturated hydraulic properties
Source: Copernicus journal article supplement (doi:10.5194/hess-21-6185-2017), 2017-12-07
Supplement: Supplementary file 22 [file A331_8_HYDRUS.xlsx]

## Sheet: Gewicht
Datum / Zeit	Brutto-Gewicht [g]	Netto-Gewicht [g]	Gewichtsänderung [g]	Zeit [d]	Theta [-]	Verdunstungsrate [cm/d]		Volumen	244
2012-12-09 01:01:10	606.935	240.635	0					Höhe	5
2012-12-09 11:54:08	596.99	230.69	-16.32	0.453459	0.902008	0.449432		A	48.8
2012-12-10 09:25:16	579.93	213.63	-33.38	1.35007	0.83209	0.3899		Theta0	0.942768
2012-12-10 17:41:58	574.21	207.91	-39.1	1.69501	0.808648	0.339813		Trockengewicht	10.6
2012-12-10 23:12:06	570.58	204.28	-42.73	1.92426	0.79377	0.324462		Ks (as in Ksat)
2012-12-11 11:56:28	561.86	195.56	-51.45	2.45508	0.758033	0.336632		delta System [g]	366.3
2012-12-11 17:29:59	557.87	191.57	-55.44	2.68669	0.74168	0.353015
2012-12-12 09:23:51	545.37	179.07	-67.94	3.34909	0.690451	0.386693
2012-12-12 17:30:21	539.21	172.91	-74.1	3.68694	0.665205	0.373635
2012-12-13 09:58:25	527.49	161.19	-85.82	4.3731	0.617172	0.35001
2012-12-13 22:00:21	518.13	151.83	-95.18	4.87444	0.578811	0.382582
2012-12-14 09:22:57	509.33	143.03	-103.98	5.34846	0.542746	0.380419
2012-12-14 20:02:41	501.96	135.66	-111.35	5.79272	0.512541	0.339947
2012-12-15 11:46:46	491.67	125.37	-121.64	6.44834	0.470369	0.321619
2012-12-16 14:41:08	475.94	109.64	-137.37	7.56943	0.405902	0.287522
2012-12-17 09:02:58	465.24	98.94	-148.07	8.33459	0.362049	0.286556
2012-12-18 08:29:46	452.61	86.31	-160.7	9.31154	0.310287	0.264919
2012-12-18 16:28:23	448.44	82.14	-164.87	9.64391	0.293197	0.257093
2012-12-19 08:09:44	440.3	74	-173.01	10.2976	0.259836	0.255163
2012-12-19 16:42:53	435.76	69.46	-177.55	10.654	0.24123	0.261067
2012-12-20 08:25:37	427.96	61.66	-185.35	11.3087	0.209262	0.244146
2012-12-20 17:24:13	423.52	57.22	-189.79	11.6827	0.191066	0.243254
2012-12-21 08:16:09	417.07	50.77	-196.24	12.3021	0.164631	0.213389
2012-12-21 18:29:53	413.11	46.81	-200.2	12.7283	0.148402	0.190396
2012-12-22 09:49:38	408.12	41.82	-205.19	13.367	0.127951	0.160094
2012-12-22 19:18:35	405.54	39.24	-207.77	13.7621	0.117377	0.133809
2012-12-23 08:48:07	402.36	36.06	-210.95	14.3243	0.104344	0.115915
2012-12-25 11:46:01	393.43	27.13	-219.88	16.4478	0.0677459	0.0861725
2012-12-26 14:41:01	389.56	23.26	-223.75	17.5693	0.0518852	0.0707102
2012-12-27 12:02:32	386.87	20.57	-226.44	18.4593	0.0408607	0.0619404
2012-12-27 18:13:11	386.16	19.86	-227.15	18.7167	0.0379508	0.0565244
2012-12-28 09:44:31	384.36	18.06	-228.95	19.3634	0.0305738	0.0570307
2012-12-29 09:40:43	381.95	15.65	-231.36	20.3608	0.0206967	0.0495156
2012-12-31 06:08:40	378.845	12.5449		22.2135	0.00797105	0.034343
2012-12-31 12:22:22	378.41	12.11	-234.9	22.4731	0.00618852	0.034343

## Sheet: Tensionen
Datum / Zeit	Tension unten [hPa]	Tension oben [hPa]	Datum / Zeit	Zeit [d]	s	Zeit [d]	MP bot(2) [cm]	MP top(1) [cm]		Versuchsbeginn
2012-12-08 17:51:08	1.77	4.17	41210.7	-0.298631		-0.298631	-1.80428	-4.25076		2012-12-09 01:01:10
2012-12-08 17:52:08	1.82	4.21	41251.7	-0.297937		-0.297937	-1.85525	-4.29154
2012-12-08 17:53:08	1.83	4.22	41251.7	-0.297242		-0.297242	-1.86544	-4.30173
2012-12-08 17:54:08	1.86	4.24	41251.7	-0.296548		-0.296548	-1.89602	-4.32212
2012-12-08 17:55:08	1.9	4.29	41251.7	-0.295853		-0.295853	-1.9368	-4.37309
2012-12-08 17:56:08	1.94	4.32	41251.7	-0.295159		-0.295159	-1.97757	-4.40367
2012-12-08 17:57:08	1.97	4.36	41251.7	-0.294464		-0.294464	-2.00815	-4.44444
2012-12-08 17:58:08	2.01	4.39	41251.7	-0.29377		-0.29377	-2.04893	-4.47503
2012-12-08 17:59:08	2.05	4.43	41251.7	-0.293075		-0.293075	-2.0897	-4.5158
2012-12-08 18:00:08	2.09	4.46	41251.8	-0.292381		-0.292381	-2.13048	-4.54638
2012-12-08 18:01:08	2.11	4.48	41251.8	-0.291687		-0.291687	-2.15087	-4.56677
2012-12-08 18:03:08	2.43	5.01	41251.8	-0.290298		-0.290298	-2.47706	-5.10703
2012-12-08 18:04:08	1.88	4.34	41251.8	-0.289603		-0.289603	-1.91641	-4.42406
2012-12-08 18:05:08	1.82	4.28	41251.8	-0.288909		-0.288909	-1.85525	-4.3629
2012-12-08 18:06:08	1.87	4.3	41251.8	-0.288214		-0.288214	-1.90622	-4.38328
2012-12-08 18:07:08	1.97	4.4	41251.8	-0.28752		-0.28752	-2.00815	-4.48522
2012-12-08 18:08:08	2.01	4.44	41251.8	-0.286825		-0.286825	-2.04893	-4.52599
2012-12-08 18:09:08	2.03	4.47	41251.8	-0.286131		-0.286131	-2.06932	-4.55657
2012-12-08 18:10:08	2.06	4.5	41251.8	-0.285437		-0.285437	-2.0999	-4.58716
2012-12-08 18:11:08	2.09	4.53	41251.8	-0.284742		-0.284742	-2.13048	-4.61774
2012-12-08 18:12:08	2.12	4.54	41251.8	-0.284048		-0.284048	-2.16106	-4.62793
2012-12-08 18:13:08	2.13	4.56	41251.8	-0.283353		-0.283353	-2.17125	-4.64832
2012-12-08 18:14:08	2.17	4.61	41251.8	-0.282659		-0.282659	-2.21203	-4.69929
2012-12-08 18:15:08	2.21	4.63	41251.8	-0.281964		-0.281964	-2.2528	-4.71967
2012-12-08 18:16:08	2.25	4.68	41251.8	-0.28127		-0.28127	-2.29358	-4.77064
2012-12-08 18:17:08	2.29	4.7	41251.8	-0.280575		-0.280575	-2.33435	-4.79103
2012-12-08 18:18:08	2.32	4.73	41251.8	-0.279881		-0.279881	-2.36493	-4.82161
2012-12-08 18:19:08	2.34	4.75	41251.8	-0.279187		-0.279187	-2.38532	-4.842
2012-12-08 18:20:08	2.37	4.78	41251.8	-0.278492		-0.278492	-2.4159	-4.87258
2012-12-08 18:21:08	2.41	4.82	41251.8	-0.277798		-0.277798	-2.45668	-4.91335
2012-12-08 18:22:08	2.45	4.85	41251.8	-0.277103		-0.277103	-2.49745	-4.94393
2012-12-08 18:23:08	2.48	4.88	41251.8	-0.276409		-0.276409	-2.52803	-4.97452
2012-12-08 18:24:08	2.49	4.91	41251.8	-0.275714		-0.275714	-2.53823	-5.0051
2012-12-08 18:25:08	2.54	4.94	41251.8	-0.27502		-0.27502	-2.58919	-5.03568
2012-12-08 18:26:08	2.57	4.96	41251.8	-0.274325		-0.274325	-2.61978	-5.05607
2012-12-08 18:27:08	2.59	5	41251.8	-0.273631		-0.273631	-2.64016	-5.09684
2012-12-08 18:28:08	2.61	5.02	41251.8	-0.272937		-0.272937	-2.66055	-5.11723
2012-12-08 18:29:08	2.64	5.05	41251.8	-0.272242		-0.272242	-2.69113	-5.14781
2012-12-08 18:30:08	2.68	5.09	41251.8	-0.271548		-0.271548	-2.73191	-5.18858
2012-12-08 18:31:08	2.71	5.12	41251.8	-0.270853		-0.270853	-2.76249	-5.21916
2012-12-08 18:32:08	2.74	5.15	41251.8	-0.270159		-0.270159	-2.79307	-5.24975
2012-12-08 18:33:08	2.78	5.17	41251.8	-0.269464		-0.269464	-2.83384	-5.27013
2012-12-08 18:34:08	2.79	5.2	41251.8	-0.26877		-0.26877	-2.84404	-5.30071
2012-12-08 18:35:08	2.83	5.23	41251.8	-0.268075		-0.268075	-2.88481	-5.33129
2012-12-08 18:36:08	2.85	5.24	41251.8	-0.267381		-0.267381	-2.9052	-5.34149
2012-12-08 18:37:08	2.87	5.28	41251.8	-0.266687		-0.266687	-2.92559	-5.38226
2012-12-08 18:38:08	2.91	5.31	41251.8	-0.265992		-0.265992	-2.96636	-5.41284
2012-12-08 18:39:08	2.94	5.35	41251.8	-0.265298		-0.265298	-2.99694	-5.45362
2012-12-08 18:40:08	2.98	5.38	41251.8	-0.264603		-0.264603	-3.03772	-5.4842
2012-12-08 18:41:08	3.01	5.4	41251.8	-0.263909		-0.263909	-3.0683	-5.50459
2012-12-08 18:42:08	3.02	5.43	41251.8	-0.263214		-0.263214	-3.07849	-5.53517
2012-12-08 18:43:08	3.06	5.46	41251.8	-0.26252		-0.26252	-3.11927	-5.56575
2012-12-08 18:44:08	3.1	5.49	41251.8	-0.261825		-0.261825	-3.16004	-5.59633
2012-12-08 18:45:08	3.12	5.52	41251.8	-0.261131		-0.261131	-3.18043	-5.62691
2012-12-08 18:46:08	3.14	5.54	41251.8	-0.260437		-0.260437	-3.20082	-5.6473
2012-12-08 18:47:08	3.18	5.57	41251.8	-0.259742		-0.259742	-3.24159	-5.67788
2012-12-08 18:48:08	3.21	5.61	41251.8	-0.259048		-0.259048	-3.27217	-5.71865
2012-12-08 18:49:08	3.23	5.64	41251.8	-0.258353		-0.258353	-3.29256	-5.74924
2012-12-08 18:50:08	3.26	5.66	41251.8	-0.257659		-0.257659	-3.32314	-5.76962
2012-12-08 18:51:08	3.28	5.69	41251.8	-0.256964		-0.256964	-3.34353	-5.8002
2012-12-08 19:01:08	3.56	5.96	41251.8	-0.25002		-0.25002	-3.62895	-6.07543
2012-12-08 19:11:08	3.82	6.24	41251.8	-0.243075		-0.243075	-3.89399	-6.36086
2012-12-08 19:21:08	4.08	6.49	41251.8	-0.236131		-0.236131	-4.15902	-6.6157
2012-12-08 19:31:08	4.3	6.72	41251.8	-0.229187		-0.229187	-4.38328	-6.85015
2012-12-08 19:41:08	4.55	6.97	41251.8	-0.222242		-0.222242	-4.63812	-7.10499
2012-12-08 19:51:08	2.7	5.14	41251.8	-0.215298		-0.215298	-2.75229	-5.23955
2012-12-08 20:01:08	2.16	4.6	41251.8	-0.208353		-0.208353	-2.20183	-4.68909
2012-12-08 20:11:08	2.04	4.46	41251.8	-0.201409		-0.201409	-2.07951	-4.54638
2012-12-08 20:21:08	1.99	4.42	41251.8	-0.194464		-0.194464	-2.02854	-4.50561
2012-12-08 20:31:08	2.01	4.45	41251.9	-0.18752		-0.18752	-2.04893	-4.53619
2012-12-08 20:41:08	2.03	4.48	41251.9	-0.180575		-0.180575	-2.06932	-4.56677
2012-12-08 20:51:08	2.05	4.5	41251.9	-0.173631		-0.173631	-2.0897	-4.58716
2012-12-08 21:01:08	2.08	4.53	41251.9	-0.166687		-0.166687	-2.12029	-4.61774
2012-12-08 21:11:08	2.14	4.58	41251.9	-0.159742		-0.159742	-2.18145	-4.66871
2012-12-08 21:21:08	2.15	4.6	41251.9	-0.152798		-0.152798	-2.19164	-4.68909
2012-12-08 21:31:08	2.2	4.65	41251.9	-0.145853		-0.145853	-2.24261	-4.74006
2012-12-08 21:41:08	2.22	4.68	41251.9	-0.138909		-0.138909	-2.263	-4.77064
2012-12-08 21:51:08	2.26	4.72	41251.9	-0.131964		-0.131964	-2.30377	-4.81142
2012-12-08 22:01:08	2.31	4.77	41251.9	-0.12502		-0.12502	-2.35474	-4.86239
2012-12-08 22:11:08	2.38	4.84	41251.9	-0.118075		-0.118075	-2.4261	-4.93374
2012-12-08 22:21:08	2.46	4.91	41251.9	-0.111131		-0.111131	-2.50765	-5.0051
2012-12-08 22:31:08	2.54	5	41251.9	-0.104187		-0.104187	-2.58919	-5.09684
2012-12-08 22:41:08	2.63	5.08	41251.9	-0.0972421		-0.0972421	-2.68094	-5.17839
2012-12-08 22:51:08	2.69	5.17	41252	-0.0902977		-0.0902977	-2.7421	-5.27013
2012-12-08 23:01:08	2.77	5.25	41252	-0.0833532		-0.0833532	-2.82365	-5.35168
2012-12-08 23:11:08	2.88	5.32	41252	-0.0764088		-0.0764088	-2.93578	-5.42304
2012-12-08 23:21:08	2.94	5.42	41252	-0.0694643		-0.0694643	-2.99694	-5.52497
2012-12-08 23:31:08	3.09	5.55	41252	-0.0625199		-0.0625199	-3.14985	-5.65749
2012-12-08 23:41:08	3.15	5.63	41252	-0.0555754		-0.0555754	-3.21101	-5.73904
2012-12-08 23:51:08	3.26	5.74	41252	-0.048631		-0.048631	-3.32314	-5.85117
2012-12-09 00:01:08	3.38	5.86	41252	-0.0416866		-0.0416866	-3.44546	-5.9735
2012-12-09 00:11:08	3.5	5.99	41252	-0.0347421		-0.0347421	-3.56779	-6.10601
2012-12-09 00:21:08	3.57	6.05	41252	-0.0277977		-0.0277977	-3.63914	-6.16718
2012-12-09 00:31:08	3.58	6.07	41252	-0.0208532		-0.0208532	-3.64934	-6.18756
2012-12-09 00:41:08	3.37	5.84	41252	-0.0139088		-0.0139088	-3.43527	-5.95311
2012-12-09 00:51:08	3.28	5.77	41252	-0.00696434		-0.00696434	-3.34353	-5.88175
2012-12-09 01:01:08	3.4	5.88	41252	-1.98929e-05		-1.98929e-05	-3.46585	-5.99388
2012-12-09 01:11:08	3.57	6.05	41252	0.00692455	41252	0.00692455	-3.63914	-6.16718
2012-12-09 01:21:08	3.72	6.21	41252.1	0.013869		0.013869	-3.79205	-6.33028
2012-12-09 01:31:08	3.87	6.37	41252.1	0.0208134		0.0208134	-3.94495	-6.49337
2012-12-09 01:41:08	4.04	6.53	41252.1	0.0277579		0.0277579	-4.11825	-6.65647
2012-12-09 01:51:08	4.22	6.71	41252.1	0.0347023		0.0347023	-4.30173	-6.83996
2012-12-09 02:01:08	4.35	6.84	41252.1	0.0416468		0.0416468	-4.43425	-6.97248
2012-12-09 02:11:08	4.51	7	41252.1	0.0485912		0.0485912	-4.59735	-7.13558
2012-12-09 02:21:08	4.69	7.19	41252.1	0.0555357	41252.1	0.0555357	-4.78084	-7.32926
2012-12-09 02:31:08	4.88	7.37	41252.1	0.0624801		0.0624801	-4.97452	-7.51274
2012-12-09 02:41:08	5.04	7.53	41252.1	0.0694246		0.0694246	-5.13761	-7.67584
2012-12-09 02:51:08	5.22	7.7	41252.1	0.076369		0.076369	-5.3211	-7.84913
2012-12-09 03:01:08	5.27	7.77	41252.1	0.0833134		0.0833134	-5.37207	-7.92049
2012-12-09 03:11:08	5.4	7.88	41252.1	0.0902579		0.0902579	-5.50459	-8.03262
2012-12-09 03:21:08	5.5	7.99	41252.1	0.0972023	41252.1	0.0972023	-5.60652	-8.14475
2012-12-09 03:31:08	5.46	7.94	41252.1	0.104147		0.104147	-5.56575	-8.09378
2012-12-09 03:41:08	5.61	8.09	41252.2	0.111091		0.111091	-5.71865	-8.24669
2012-12-09 03:51:08	5.78	8.26	41252.2	0.118036		0.118036	-5.89195	-8.41998
2012-12-09 04:01:08	5.94	8.42	41252.2	0.12498		0.12498	-6.05505	-8.58308
2012-12-09 04:11:08	6.07	8.57	41252.2	0.131925		0.131925	-6.18756	-8.73598
2012-12-09 04:21:08	6.21	8.71	41252.2	0.138869	41252.2	0.138869	-6.33028	-8.8787
2012-12-09 04:31:08	6.35	8.85	41252.2	0.145813		0.145813	-6.47299	-9.02141
2012-12-09 04:41:08	6.48	8.97	41252.2	0.152758		0.152758	-6.6055	-9.14373
2012-12-09 04:51:08	6.62	9.12	41252.2	0.159702		0.159702	-6.74822	-9.29664
2012-12-09 05:01:08	6.75	9.23	41252.2	0.166647		0.166647	-6.88073	-9.40877
2012-12-09 05:11:08	6.81	9.32	41252.2	0.173591		0.173591	-6.9419	-9.50051
2012-12-09 05:21:08	6.89	9.38	41252.2	0.180536	41252.2	0.180536	-7.02345	-9.56167
2012-12-09 05:31:08	6.64	9.13	41252.2	0.18748		0.18748	-6.7686	-9.30683
2012-12-09 05:41:08	6.83	9.33	41252.2	0.194425		0.194425	-6.96228	-9.5107
2012-12-09 05:51:08	7	9.49	41252.2	0.201369		0.201369	-7.13558	-9.6738
2012-12-09 06:01:08	7.15	9.64	41252.3	0.208313		0.208313	-7.28848	-9.82671
2012-12-09 06:11:08	7.31	9.78	41252.3	0.215258		0.215258	-7.45158	-9.96942
2012-12-09 06:21:08	7.35	9.85	41252.3	0.222202	41252.3	0.222202	-7.49235	-10.0408
2012-12-09 06:31:08	7.46	9.96	41252.3	0.229147		0.229147	-7.60449	-10.1529
2012-12-09 06:41:08	7.21	9.69	41252.3	0.236091		0.236091	-7.34964	-9.87768
2012-12-09 06:51:08	7.46	9.94	41252.3	0.243036		0.243036	-7.60449	-10.1325
2012-12-09 07:01:08	7.59	10.07	41252.3	0.24998		0.24998	-7.737	-10.265
2012-12-09 07:11:08	7.72	10.21	41252.3	0.256925		0.256925	-7.86952	-10.4077
2012-12-09 07:21:08	7.82	10.3	41252.3	0.263869	41252.3	0.263869	-7.97146	-10.4995
2012-12-09 07:31:08	7.93	10.41	41252.3	0.270813		0.270813	-8.08359	-10.6116
2012-12-09 07:41:08	8.02	10.51	41252.3	0.277758		0.277758	-8.17533	-10.7136
2012-12-09 07:51:08	8.13	10.6	41252.3	0.284702		0.284702	-8.28746	-10.8053
2012-12-09 08:01:08	8.26	10.72	41252.3	0.291647		0.291647	-8.41998	-10.9276
2012-12-09 08:11:08	8.37	10.87	41252.3	0.298591		0.298591	-8.53211	-11.0805
2012-12-09 08:21:08	8.48	10.96	41252.3	0.305536	41252.3	0.305536	-8.64424	-11.1723
2012-12-09 08:31:08	8.6	11.06	41252.4	0.31248		0.31248	-8.76656	-11.2742
2012-12-09 08:41:08	8.7	11.18	41252.4	0.319425		0.319425	-8.8685	-11.3965
2012-12-09 08:51:08	8.81	11.28	41252.4	0.326369		0.326369	-8.98063	-11.4985
2012-12-09 09:01:08	8.88	11.35	41252.4	0.333313		0.333313	-9.05199	-11.5698
2012-12-09 09:11:08	9.01	11.47	41252.4	0.340258		0.340258	-9.18451	-11.6922
2012-12-09 09:21:08	9.1	11.57	41252.4	0.347202	41252.4	0.347202	-9.27625	-11.7941
2012-12-09 09:31:08	9.18	11.64	41252.4	0.354147		0.354147	-9.3578	-11.8654
2012-12-09 09:41:08	9.29	11.76	41252.4	0.361091		0.361091	-9.46993	-11.9878
2012-12-09 09:51:08	9.41	11.87	41252.4	0.368036		0.368036	-9.59225	-12.0999
2012-12-09 10:01:08	9.48	11.94	41252.4	0.37498		0.37498	-9.66361	-12.1713
2012-12-09 10:11:08	9.56	12.02	41252.4	0.381925		0.381925	-9.74516	-12.2528
2012-12-09 10:21:08	9.66	12.13	41252.4	0.388869	41252.4	0.388869	-9.84709	-12.3649
2012-12-09 10:31:08	9.75	12.2	41252.4	0.395813		0.395813	-9.93884	-12.4363
2012-12-09 10:41:08	9.81	12.28	41252.4	0.402758		0.402758	-10	-12.5178
2012-12-09 10:51:08	9.91	12.38	41252.5	0.409702		0.409702	-10.1019	-12.6198
2012-12-09 11:01:08	9.97	12.45	41252.5	0.416647		0.416647	-10.1631	-12.6911
2012-12-09 11:11:08	10.05	12.54	41252.5	0.423591		0.423591	-10.2446	-12.7829
2012-12-09 11:21:08	10.1	12.56	41252.5	0.430536	41252.5	0.430536	-10.2956	-12.8033
2012-12-09 11:31:08	10.22	12.68	41252.5	0.43748		0.43748	-10.4179	-12.9256
2012-12-09 11:41:08	10.24	12.71	41252.5	0.444425		0.444425	-10.4383	-12.9562
2012-12-09 11:51:08	10.3	12.8	41252.5	0.451369		0.451369	-10.4995	-13.0479
2012-12-09 12:01:08	9.75	12.21	41252.5	0.458313		0.458313	-9.93884	-12.4465
2012-12-09 12:11:08	10	12.45	41252.5	0.465258		0.465258	-10.1937	-12.6911
2012-12-09 12:21:08	10.18	12.64	41252.5	0.472202	41252.5	0.472202	-10.3772	-12.8848
2012-12-09 12:31:08	10.34	12.81	41252.5	0.479147		0.479147	-10.5403	-13.0581
2012-12-09 12:41:08	10.43	12.89	41252.5	0.486091		0.486091	-10.632	-13.1397
2012-12-09 12:51:08	10.49	12.95	41252.5	0.493036		0.493036	-10.6932	-13.2008
2012-12-09 13:01:08	10.62	13.07	41252.5	0.49998		0.49998	-10.8257	-13.3231
2012-12-09 13:21:08	10.75	13.2	41252.6	0.513869		0.513869	-10.9582	-13.4557
2012-12-09 13:31:08	10.82	13.28	41252.6	0.520813	41252.6	0.520813	-11.0296	-13.5372
2012-12-09 13:41:08	10.91	13.37	41252.6	0.527758		0.527758	-11.1213	-13.629
2012-12-09 13:51:08	11	13.45	41252.6	0.534702		0.534702	-11.213	-13.7105
2012-12-09 14:01:08	11.08	13.54	41252.6	0.541647		0.541647	-11.2946	-13.8022
2012-12-09 14:11:08	11.18	13.63	41252.6	0.548591		0.548591	-11.3965	-13.894
2012-12-09 14:21:08	11.24	13.67	41252.6	0.555536		0.555536	-11.4577	-13.9348
2012-12-09 14:31:08	11.24	13.72	41252.6	0.56248	41252.6	0.56248	-11.4577	-13.9857
2012-12-09 14:41:08	11.37	13.82	41252.6	0.569425		0.569425	-11.5902	-14.0877
2012-12-09 14:51:08	11.45	13.89	41252.6	0.576369		0.576369	-11.6718	-14.159
2012-12-09 15:01:08	11.49	13.95	41252.6	0.583313		0.583313	-11.7125	-14.2202
2012-12-09 15:11:08	11.59	14.03	41252.6	0.590258		0.590258	-11.8145	-14.3017
2012-12-09 15:21:08	11.62	14.06	41252.6	0.597202		0.597202	-11.8451	-14.3323
2012-12-09 15:31:08	11.69	14.14	41252.6	0.604147	41252.6	0.604147	-11.9164	-14.4139
2012-12-09 15:41:08	11.78	14.23	41252.7	0.611091		0.611091	-12.0082	-14.5056
2012-12-09 15:51:08	11.86	14.31	41252.7	0.618036		0.618036	-12.0897	-14.5872
2012-12-09 16:21:08	12.04	14.49	41252.7	0.638869		0.638869	-12.2732	-14.7706
2012-12-09 16:41:08	12.2	14.66	41252.7	0.652758	41252.7	0.652758	-12.4363	-14.9439
2012-12-09 16:51:08	11.43	13.94	41252.7	0.659702		0.659702	-11.6514	-14.21
2012-12-09 17:01:08	11.16	13.64	41252.7	0.666647		0.666647	-11.3761	-13.9042
2012-12-09 17:11:08	11.47	13.94	41252.7	0.673591		0.673591	-11.6922	-14.21
2012-12-09 17:21:08	11.73	14.2	41252.7	0.680536		0.680536	-11.9572	-14.475
2012-12-09 17:31:08	12	14.44	41252.7	0.68748		0.68748	-12.2324	-14.7197
2012-12-09 17:51:08	12.26	14.71	41252.7	0.701369	41252.7	0.701369	-12.4975	-14.9949
2012-12-09 18:01:08	12.38	14.82	41252.8	0.708313		0.708313	-12.6198	-15.107
2012-12-09 18:11:08	12.37	14.8	41252.8	0.715258		0.715258	-12.6096	-15.0866
2012-12-09 18:21:08	12.44	14.88	41252.8	0.722202		0.722202	-12.6809	-15.1682
2012-12-09 18:31:08	12.54	14.98	41252.8	0.729147		0.729147	-12.7829	-15.2701
2012-12-09 18:41:08	12.66	15.09	41252.8	0.736091		0.736091	-12.9052	-15.3823
2012-12-09 18:51:08	12.68	15.11	41252.8	0.743036	41252.8	0.743036	-12.9256	-15.4027
2012-12-09 19:01:08	12.82	15.24	41252.8	0.74998		0.74998	-13.0683	-15.5352
2012-12-09 19:11:08	12.9	15.34	41252.8	0.756925		0.756925	-13.1498	-15.6371
2012-12-09 19:21:08	12.96	15.39	41252.8	0.763869		0.763869	-13.211	-15.6881
2012-12-09 19:31:08	13.04	15.47	41252.8	0.770813		0.770813	-13.2926	-15.7696
2012-12-09 19:41:08	13.11	15.54	41252.8	0.777758		0.777758	-13.3639	-15.841
2012-12-09 19:51:08	12.89	15.34	41252.8	0.784702	41252.8	0.784702	-13.1397	-15.6371
2012-12-09 20:01:08	13.18	15.63	41252.8	0.791647		0.791647	-13.4353	-15.9327
2012-12-09 20:11:08	13.32	15.77	41252.8	0.798591		0.798591	-13.578	-16.0754
2012-12-09 20:21:08	13.25	15.69	41252.8	0.805536		0.805536	-13.5066	-15.9939
2012-12-09 20:31:08	13.37	15.8	41252.9	0.81248		0.81248	-13.629	-16.106
2012-12-09 20:41:08	13.45	15.87	41252.9	0.819425		0.819425	-13.7105	-16.1774
2012-12-09 20:51:08	13.53	15.96	41252.9	0.826369	41252.9	0.826369	-13.792	-16.2691
2012-12-09 21:01:08	13.6	16.01	41252.9	0.833313		0.833313	-13.8634	-16.3201
2012-12-09 21:11:08	13.65	16.08	41252.9	0.840258		0.840258	-13.9144	-16.3914
2012-12-09 21:21:08	13.75	16.17	41252.9	0.847202		0.847202	-14.0163	-16.4832
2012-12-09 21:31:08	13.83	16.27	41252.9	0.854147		0.854147	-14.0979	-16.5851
2012-12-09 21:41:08	13.89	16.32	41252.9	0.861091		0.861091	-14.159	-16.6361
2012-12-09 21:51:08	13.97	16.38	41252.9	0.868036	41252.9	0.868036	-14.2406	-16.6972
2012-12-09 22:01:08	13.99	16.42	41252.9	0.87498		0.87498	-14.261	-16.738
2012-12-09 22:11:08	14.06	16.5	41252.9	0.881925		0.881925	-14.3323	-16.8196
2012-12-09 22:21:08	14.13	16.56	41252.9	0.888869		0.888869	-14.4037	-16.8807
2012-12-09 22:31:08	14.21	16.63	41252.9	0.895813		0.895813	-14.4852	-16.9521
2012-12-09 22:41:08	14.24	16.67	41252.9	0.902758		0.902758	-14.5158	-16.9929
2012-12-09 22:51:08	14.25	16.68	41253	0.909702	41253	0.909702	-14.526	-17.0031
2012-12-09 23:01:08	14.34	16.77	41253	0.916647		0.916647	-14.6177	-17.0948
2012-12-09 23:11:08	14.42	16.85	41253	0.923591		0.923591	-14.6993	-17.1764
2012-12-09 23:21:08	14.49	16.92	41253	0.930536		0.930536	-14.7706	-17.2477
2012-12-09 23:31:08	14.53	16.94	41253	0.93748		0.93748	-14.8114	-17.2681
2012-12-09 23:41:08	14.58	17.02	41253	0.944425		0.944425	-14.8624	-17.3496
2012-12-09 23:51:08	14.65	17.08	41253	0.951369	41253	0.951369	-14.9337	-17.4108
2012-12-10 00:01:08	14.68	17.11	41253	0.958313		0.958313	-14.9643	-17.4414
2012-12-10 00:11:08	14.7	17.12	41253	0.965258		0.965258	-14.9847	-17.4516
2012-12-10 00:21:08	14.78	17.2	41253	0.972202		0.972202	-15.0663	-17.5331
2012-12-10 00:31:08	14.64	17.07	41253	0.979147		0.979147	-14.9235	-17.4006
2012-12-10 00:41:08	14.71	17.14	41253	0.986091		0.986091	-14.9949	-17.472
2012-12-10 00:51:08	14.85	17.28	41253	0.993036	41253	0.993036	-15.1376	-17.6147
2012-12-10 01:01:08	14.92	17.35	41253	0.99998		0.99998	-15.209	-17.686
2012-12-10 01:11:08	14.99	17.43	41253	1.00692		1.00692	-15.2803	-17.7676
2012-12-10 01:21:08	15	17.43	41253.1	1.01387		1.01387	-15.2905	-17.7676
2012-12-10 01:31:08	15.04	17.45	41253.1	1.02081		1.02081	-15.3313	-17.788
2012-12-10 01:41:08	15.04	17.47	41253.1	1.02776		1.02776	-15.3313	-17.8084
2012-12-10 01:51:08	15.11	17.55	41253.1	1.0347	41253.1	1.0347	-15.4027	-17.8899
2012-12-10 02:01:08	15.17	17.61	41253.1	1.04165		1.04165	-15.4638	-17.9511
2012-12-10 02:11:08	15.26	17.68	41253.1	1.04859		1.04859	-15.5556	-18.0224
2012-12-10 02:21:08	15.1	17.52	41253.1	1.05554		1.05554	-15.3925	-17.8593
2012-12-10 02:31:08	15.28	17.7	41253.1	1.06248		1.06248	-15.5759	-18.0428
2012-12-10 02:41:08	15.34	17.76	41253.1	1.06942		1.06942	-15.6371	-18.104
2012-12-10 02:51:08	15.39	17.82	41253.1	1.07637	41253.1	1.07637	-15.6881	-18.1651
2012-12-10 03:01:08	15.45	17.88	41253.1	1.08331		1.08331	-15.7492	-18.2263
2012-12-10 03:11:08	15.48	17.92	41253.1	1.09026		1.09026	-15.7798	-18.2671
2012-12-10 03:21:08	15.52	17.95	41253.1	1.0972		1.0972	-15.8206	-18.2977
2012-12-10 03:31:08	15.59	18.02	41253.1	1.10415		1.10415	-15.8919	-18.369
2012-12-10 03:41:08	15.64	18.07	41253.2	1.11109		1.11109	-15.9429	-18.42
2012-12-10 03:51:08	15.39	17.82	41253.2	1.11804	41253.2	1.11804	-15.6881	-18.1651
2012-12-10 04:01:08	15.59	18.01	41253.2	1.12498		1.12498	-15.8919	-18.3588
2012-12-10 04:11:08	15.68	18.12	41253.2	1.13192		1.13192	-15.9837	-18.4709
2012-12-10 04:21:08	15.75	18.17	41253.2	1.13887		1.13887	-16.055	-18.5219
2012-12-10 04:31:08	15.81	18.24	41253.2	1.14581		1.14581	-16.1162	-18.5933
2012-12-10 04:41:08	15.81	18.22	41253.2	1.15276		1.15276	-16.1162	-18.5729
2012-12-10 04:51:08	15.88	18.31	41253.2	1.1597	41253.2	1.1597	-16.1876	-18.6646
2012-12-10 05:01:08	15.94	18.37	41253.2	1.16665		1.16665	-16.2487	-18.7258
2012-12-10 05:11:08	15.99	18.43	41253.2	1.17359		1.17359	-16.2997	-18.787
2012-12-10 05:21:08	16.02	18.45	41253.2	1.18054		1.18054	-16.3303	-18.8073
2012-12-10 05:31:08	16.09	18.52	41253.2	1.18748		1.18748	-16.4016	-18.8787
2012-12-10 05:41:08	16.14	18.55	41253.2	1.19442		1.19442	-16.4526	-18.9093
2012-12-10 05:51:08	16.17	18.6	41253.2	1.20137	41253.2	1.20137	-16.4832	-18.9602
2012-12-10 06:01:08	16.25	18.66	41253.3	1.20831		1.20831	-16.5647	-19.0214
2012-12-10 06:11:08	16.28	18.7	41253.3	1.21526		1.21526	-16.5953	-19.0622
2012-12-10 06:21:08	16.3	18.73	41253.3	1.2222		1.2222	-16.6157	-19.0928
2012-12-10 06:31:08	16.37	18.8	41253.3	1.22915		1.22915	-16.6871	-19.1641
2012-12-10 06:41:08	16.4	18.83	41253.3	1.23609		1.23609	-16.7176	-19.1947
2012-12-10 06:51:08	16.47	18.91	41253.3	1.24304	41253.3	1.24304	-16.789	-19.2762
2012-12-10 07:01:08	16.52	18.94	41253.3	1.24998		1.24998	-16.84	-19.3068
2012-12-10 07:11:08	16.25	18.68	41253.3	1.25692		1.25692	-16.5647	-19.0418
2012-12-10 07:21:08	16.26	18.69	41253.3	1.26387		1.26387	-16.5749	-19.052
2012-12-10 07:31:08	16.47	18.88	41253.3	1.27081		1.27081	-16.789	-19.2457
2012-12-10 07:41:08	16.53	18.95	41253.3	1.27776		1.27776	-16.8502	-19.317
2012-12-10 07:51:08	16.58	19.01	41253.3	1.2847	41253.3	1.2847	-16.9011	-19.3782
2012-12-10 08:01:08	16.64	19.06	41253.3	1.29165		1.29165	-16.9623	-19.4292
2012-12-10 08:11:08	16.61	19.04	41253.3	1.29859		1.29859	-16.9317	-19.4088
2012-12-10 08:21:08	16.64	19.07	41253.3	1.30554		1.30554	-16.9623	-19.4393
2012-12-10 08:31:08	16.68	19.13	41253.4	1.31248		1.31248	-17.0031	-19.5005
2012-12-10 08:41:08	16.72	19.15	41253.4	1.31942		1.31942	-17.0438	-19.5209
2012-12-10 08:51:08	16.72	19.15	41253.4	1.32637	41253.4	1.32637	-17.0438	-19.5209
2012-12-10 09:01:08	16.72	19.16	41253.4	1.33331		1.33331	-17.0438	-19.5311
2012-12-10 09:11:08	16.63	19.07	41253.4	1.34026		1.34026	-16.9521	-19.4393
2012-12-10 09:21:08	16.73	19.16	41253.4	1.3472		1.3472	-17.054	-19.5311
2012-12-10 09:31:08	16.48	18.92	41253.4	1.35415		1.35415	-16.7992	-19.2864
2012-12-10 09:41:08	16.7	19.13	41253.4	1.36109		1.36109	-17.0234	-19.5005
2012-12-10 09:51:08	16.82	19.24	41253.4	1.36804	41253.4	1.36804	-17.1458	-19.6126
2012-12-10 10:01:08	16.87	19.31	41253.4	1.37498		1.37498	-17.1967	-19.684
2012-12-10 10:11:08	16.91	19.35	41253.4	1.38192		1.38192	-17.2375	-19.7248
2012-12-10 10:21:08	17	19.44	41253.4	1.38887		1.38887	-17.3293	-19.8165
2012-12-10 10:31:08	17.09	19.53	41253.4	1.39581		1.39581	-17.421	-19.9083
2012-12-10 10:41:08	17.09	19.54	41253.4	1.40276		1.40276	-17.421	-19.9185
2012-12-10 10:51:08	17.11	19.57	41253.5	1.4097	41253.5	1.4097	-17.4414	-19.949
2012-12-10 11:01:08	17.14	19.6	41253.5	1.41665		1.41665	-17.472	-19.9796
2012-12-10 11:11:08	17.05	19.47	41253.5	1.42359		1.42359	-17.3802	-19.8471
2012-12-10 11:21:08	17.04	19.46	41253.5	1.43054		1.43054	-17.37	-19.8369
2012-12-10 11:31:08	17.1	19.54	41253.5	1.43748		1.43748	-17.4312	-19.9185
2012-12-10 11:41:08	17.15	19.57	41253.5	1.44442		1.44442	-17.4822	-19.949
2012-12-10 11:51:08	17.19	19.61	41253.5	1.45137	41253.5	1.45137	-17.5229	-19.9898
2012-12-10 12:01:08	17.26	19.68	41253.5	1.45831		1.45831	-17.5943	-20.0612
2012-12-10 12:11:08	17.26	19.69	41253.5	1.46526		1.46526	-17.5943	-20.0714
2012-12-10 12:21:08	17.23	19.66	41253.5	1.4722		1.4722	-17.5637	-20.0408
2012-12-10 12:31:08	17.28	19.68	41253.5	1.47915		1.47915	-17.6147	-20.0612
2012-12-10 12:41:08	17.32	19.73	41253.5	1.48609		1.48609	-17.6555	-20.1121
2012-12-10 12:51:08	17.29	19.71	41253.5	1.49304	41253.5	1.49304	-17.6249	-20.0917
2012-12-10 13:01:08	17.36	19.79	41253.5	1.49998		1.49998	-17.6962	-20.1733
2012-12-10 13:08:40	17.38	19.8	41253.5	1.50522		1.50522	-17.7166	-20.1835
2012-12-10 13:09:40	17.38	19.8	41253.5	1.50591		1.50591	-17.7166	-20.1835
2012-12-10 13:10:40	17.39	19.84	41253.5	1.5066		1.5066	-17.7268	-20.2243
2012-12-10 13:11:40	17.4	19.82	41253.5	1.5073		1.5073	-17.737	-20.2039
2012-12-10 13:12:40	17.4	19.82	41253.6	1.50799	41253.6	1.50799	-17.737	-20.2039
2012-12-10 13:13:40	17.42	19.85	41253.6	1.50869		1.50869	-17.7574	-20.2345
2012-12-10 13:14:40	17.42	19.84	41253.6	1.50938		1.50938	-17.7574	-20.2243
2012-12-10 13:15:40	17.41	19.83	41253.6	1.51008		1.51008	-17.7472	-20.2141
2012-12-10 13:16:40	17.44	19.85	41253.6	1.51077		1.51077	-17.7778	-20.2345
2012-12-10 13:17:40	17.43	19.86	41253.6	1.51147		1.51147	-17.7676	-20.2446
2012-12-10 13:18:40	17.44	19.87	41253.6	1.51216	41253.6	1.51216	-17.7778	-20.2548
2012-12-10 13:19:40	17.43	19.85	41253.6	1.51285		1.51285	-17.7676	-20.2345
2012-12-10 13:20:40	17.44	19.86	41253.6	1.51355		1.51355	-17.7778	-20.2446
2012-12-10 13:21:40	17.43	19.85	41253.6	1.51424		1.51424	-17.7676	-20.2345
2012-12-10 13:22:40	17.35	19.75	41253.6	1.51494		1.51494	-17.686	-20.1325
2012-12-10 13:23:40	17.35	19.78	41253.6	1.51563		1.51563	-17.686	-20.1631
2012-12-10 13:24:40	17.36	19.78	41253.6	1.51633	41253.6	1.51633	-17.6962	-20.1631
2012-12-10 13:25:40	17.4	19.85	41253.6	1.51702		1.51702	-17.737	-20.2345
2012-12-10 13:26:40	17.38	19.81	41253.6	1.51772		1.51772	-17.7166	-20.1937
2012-12-10 13:27:40	17.4	19.83	41253.6	1.51841		1.51841	-17.737	-20.2141
2012-12-10 13:28:40	17.43	19.83	41253.6	1.5191		1.5191	-17.7676	-20.2141
2012-12-10 13:29:40	17.43	19.86	41253.6	1.5198		1.5198	-17.7676	-20.2446
2012-12-10 13:30:40	17.43	19.85	41253.6	1.52049	41253.6	1.52049	-17.7676	-20.2345
2012-12-10 13:31:40	17.44	19.87	41253.6	1.52119		1.52119	-17.7778	-20.2548
2012-12-10 13:32:40	17.42	19.86	41253.6	1.52188		1.52188	-17.7574	-20.2446
2012-12-10 13:33:40	17.44	19.87	41253.6	1.52258		1.52258	-17.7778	-20.2548
2012-12-10 13:34:40	17.42	19.85	41253.6	1.52327		1.52327	-17.7574	-20.2345
2012-12-10 13:35:40	17.45	19.86	41253.6	1.52397		1.52397	-17.788	-20.2446
2012-12-10 13:36:40	17.44	19.87	41253.6	1.52466	41253.6	1.52466	-17.7778	-20.2548
2012-12-10 13:37:40	17.43	19.84	41253.6	1.52535		1.52535	-17.7676	-20.2243
2012-12-10 13:38:40	17.45	19.86	41253.6	1.52605		1.52605	-17.788	-20.2446
2012-12-10 13:39:40	17.46	19.89	41253.6	1.52674		1.52674	-17.7982	-20.2752
2012-12-10 13:40:40	17.48	19.88	41253.6	1.52744		1.52744	-17.8186	-20.265
2012-12-10 13:41:40	17.48	19.9	41253.6	1.52813		1.52813	-17.8186	-20.2854
2012-12-10 13:42:40	17.39	19.82	41253.6	1.52883	41253.6	1.52883	-17.7268	-20.2039
2012-12-10 13:43:40	17.4	19.83	41253.6	1.52952		1.52952	-17.737	-20.2141
2012-12-10 13:44:40	17.47	19.88	41253.6	1.53022		1.53022	-17.8084	-20.265
2012-12-10 13:45:40	17.46	19.86	41253.6	1.53091		1.53091	-17.7982	-20.2446
2012-12-10 13:46:40	17.48	19.9	41253.6	1.5316		1.5316	-17.8186	-20.2854
2012-12-10 13:47:40	17.49	19.9	41253.6	1.5323		1.5323	-17.8287	-20.2854
2012-12-10 13:48:40	17.48	19.91	41253.6	1.53299	41253.6	1.53299	-17.8186	-20.2956
2012-12-10 13:49:40	17.45	19.88	41253.6	1.53369		1.53369	-17.788	-20.265
2012-12-10 13:50:40	17.49	19.89	41253.6	1.53438		1.53438	-17.8287	-20.2752
2012-12-10 13:51:40	17.43	19.86	41253.6	1.53508		1.53508	-17.7676	-20.2446
2012-12-10 13:52:40	17.47	19.89	41253.6	1.53577		1.53577	-17.8084	-20.2752
2012-12-10 13:53:40	17.46	19.88	41253.6	1.53647		1.53647	-17.7982	-20.265
2012-12-10 13:54:40	17.45	19.88	41253.6	1.53716	41253.6	1.53716	-17.788	-20.265
2012-12-10 13:55:40	17.46	19.87	41253.6	1.53785		1.53785	-17.7982	-20.2548
2012-12-10 13:56:40	17.39	19.82	41253.6	1.53855		1.53855	-17.7268	-20.2039
2012-12-10 13:57:40	17.45	19.86	41253.6	1.53924		1.53924	-17.788	-20.2446
2012-12-10 13:58:40	17.44	19.86	41253.6	1.53994		1.53994	-17.7778	-20.2446
2012-12-10 13:59:40	17.47	19.89	41253.6	1.54063		1.54063	-17.8084	-20.2752
2012-12-10 14:00:40	17.49	19.88	41253.6	1.54133	41253.6	1.54133	-17.8287	-20.265
2012-12-10 14:01:40	17.46	19.89	41253.6	1.54202		1.54202	-17.7982	-20.2752
2012-12-10 14:02:40	17.46	19.9	41253.6	1.54272		1.54272	-17.7982	-20.2854
2012-12-10 14:03:40	17.49	19.92	41253.6	1.54341		1.54341	-17.8287	-20.3058
2012-12-10 14:04:40	17.5	19.93	41253.6	1.5441		1.5441	-17.8389	-20.316
2012-12-10 14:05:40	17.51	19.94	41253.6	1.5448		1.5448	-17.8491	-20.3262
2012-12-10 14:06:40	17.52	19.92	41253.6	1.54549	41253.6	1.54549	-17.8593	-20.3058
2012-12-10 14:07:40	17.53	19.96	41253.6	1.54619		1.54619	-17.8695	-20.3466
2012-12-10 14:08:40	17.55	19.96	41253.6	1.54688		1.54688	-17.8899	-20.3466
2012-12-10 14:18:40	17.59	20.01	41253.6	1.55383		1.55383	-17.9307	-20.3976
2012-12-10 14:28:40	17.62	20.04	41253.6	1.56077		1.56077	-17.9613	-20.4281
2012-12-10 14:38:40	17.68	20.1	41253.6	1.56772		1.56772	-18.0224	-20.4893
2012-12-10 14:48:40	17.72	20.14	41253.6	1.57466	41253.6	1.57466	-18.0632	-20.5301
2012-12-10 14:58:40	17.78	20.22	41253.6	1.5816		1.5816	-18.1244	-20.6116
2012-12-10 15:08:40	17.6	20	41253.6	1.58855		1.58855	-17.9409	-20.3874
2012-12-10 15:18:40	17.79	20.21	41253.6	1.59549		1.59549	-18.1346	-20.6014
2012-12-10 15:28:40	17.84	20.27	41253.6	1.60244		1.60244	-18.1855	-20.6626
2012-12-10 15:38:40	17.86	20.26	41253.7	1.60938		1.60938	-18.2059	-20.6524
2012-12-10 15:48:40	17.9	20.31	41253.7	1.61633	41253.7	1.61633	-18.2467	-20.7034
2012-12-10 15:58:40	17.95	20.36	41253.7	1.62327		1.62327	-18.2977	-20.7543
2012-12-10 16:08:40	17.95	20.36	41253.7	1.63022		1.63022	-18.2977	-20.7543
2012-12-10 16:18:40	17.97	20.39	41253.7	1.63716		1.63716	-18.318	-20.7849
2012-12-10 16:28:40	18.02	20.46	41253.7	1.6441		1.6441	-18.369	-20.8563
2012-12-10 16:38:40	18.06	20.46	41253.7	1.65105		1.65105	-18.4098	-20.8563
2012-12-10 16:48:40	18.1	20.52	41253.7	1.65799	41253.7	1.65799	-18.4506	-20.9174
2012-12-10 16:58:40	18.1	20.53	41253.7	1.66494		1.66494	-18.4506	-20.9276
2012-12-10 17:08:40	18.21	20.63	41253.7	1.67188		1.67188	-18.5627	-21.0296
2012-12-10 17:18:40	18.21	20.65	41253.7	1.67883		1.67883	-18.5627	-21.0499
2012-12-10 17:28:40	18.28	20.71	41253.7	1.68577		1.68577	-18.634	-21.1111
2012-12-10 17:38:40	18.33	20.76	41253.7	1.69272		1.69272	-18.685	-21.1621
2012-12-10 17:48:40	18.37	20.81	41253.7	1.69966	41253.7	1.69966	-18.7258	-21.213
2012-12-10 17:58:40	18.49	20.94	41253.7	1.7066		1.7066	-18.8481	-21.3456
2012-12-10 18:08:40	18.54	20.95	41253.8	1.71355		1.71355	-18.8991	-21.3558
2012-12-10 18:18:40	18.1	20.53	41253.8	1.72049		1.72049	-18.4506	-20.9276
2012-12-10 18:28:40	18.3	20.74	41253.8	1.72744		1.72744	-18.6544	-21.1417
2012-12-10 18:38:40	18.47	20.91	41253.8	1.73438		1.73438	-18.8277	-21.315
2012-12-10 18:48:40	18.6	21.01	41253.8	1.74133	41253.8	1.74133	-18.9602	-21.4169
2012-12-10 18:58:40	18.6	21.02	41253.8	1.74827		1.74827	-18.9602	-21.4271
2012-12-10 19:08:40	18.64	21.08	41253.8	1.75522		1.75522	-19.001	-21.4883
2012-12-10 19:18:40	18.66	21.1	41253.8	1.76216		1.76216	-19.0214	-21.5087
2012-12-10 19:28:40	18.69	21.14	41253.8	1.7691		1.7691	-19.052	-21.5494
2012-12-10 19:38:40	18.74	21.18	41253.8	1.77605		1.77605	-19.103	-21.5902
2012-12-10 19:48:40	18.81	21.25	41253.8	1.78299	41253.8	1.78299	-19.1743	-21.6616
2012-12-10 19:58:40	18.87	21.3	41253.8	1.78994		1.78994	-19.2355	-21.7125
2012-12-10 20:08:40	18.87	21.3	41253.8	1.79688		1.79688	-19.2355	-21.7125
2012-12-10 20:18:40	18.92	21.36	41253.8	1.80383		1.80383	-19.2864	-21.7737
2012-12-10 20:28:40	18.97	21.4	41253.9	1.81077		1.81077	-19.3374	-21.8145
2012-12-10 20:38:40	18.99	21.43	41253.9	1.81772		1.81772	-19.3578	-21.8451
2012-12-10 20:48:40	19	21.44	41253.9	1.82466	41253.9	1.82466	-19.368	-21.8552
2012-12-10 20:58:40	19.06	21.49	41253.9	1.8316		1.8316	-19.4292	-21.9062
2012-12-10 21:08:40	19.07	21.51	41253.9	1.83855		1.83855	-19.4393	-21.9266
2012-12-10 21:18:40	19.1	21.54	41253.9	1.84549		1.84549	-19.4699	-21.9572
2012-12-10 21:28:40	19.09	21.54	41253.9	1.85244		1.85244	-19.4597	-21.9572
2012-12-10 21:38:40	19.15	21.6	41253.9	1.85938		1.85938	-19.5209	-22.0183
2012-12-10 21:48:40	19.18	21.63	41253.9	1.86633	41253.9	1.86633	-19.5515	-22.0489
2012-12-10 21:58:40	19.24	21.69	41253.9	1.87327		1.87327	-19.6126	-22.1101
2012-12-10 22:08:40	19.23	21.67	41253.9	1.88022		1.88022	-19.6024	-22.0897
2012-12-10 22:18:40	19.29	21.74	41253.9	1.88716		1.88716	-19.6636	-22.1611
2012-12-10 22:28:40	19.35	21.8	41253.9	1.8941		1.8941	-19.7248	-22.2222
2012-12-10 22:38:40	19.41	21.86	41253.9	1.90105		1.90105	-19.7859	-22.2834
2012-12-10 22:48:40	19.42	21.85	41254	1.90799	41254	1.90799	-19.7961	-22.2732
2012-12-10 22:58:40	19.46	21.92	41254	1.91494		1.91494	-19.8369	-22.3445
2012-12-10 23:08:40	19.51	21.96	41254	1.92188		1.92188	-19.8879	-22.3853
2012-12-10 23:18:40	19.37	21.81	41254	1.92883		1.92883	-19.7452	-22.2324
2012-12-10 23:28:40	19.52	21.95	41254	1.93577		1.93577	-19.8981	-22.3751
2012-12-10 23:38:40	19.52	21.95	41254	1.94272		1.94272	-19.8981	-22.3751
2012-12-10 23:48:40	19.58	22.03	41254	1.94966	41254	1.94966	-19.9592	-22.4567
2012-12-10 23:58:40	19.62	22.03	41254	1.9566		1.9566	-20	-22.4567
2012-12-11 00:08:40	19.67	22.11	41254	1.96355		1.96355	-20.051	-22.5382
2012-12-11 00:18:40	19.65	22.08	41254	1.97049		1.97049	-20.0306	-22.5076
2012-12-11 00:28:40	19.7	22.13	41254	1.97744		1.97744	-20.0815	-22.5586
2012-12-11 00:38:40	19.74	22.17	41254	1.98438		1.98438	-20.1223	-22.5994
2012-12-11 00:48:40	19.76	22.19	41254	1.99133	41254	1.99133	-20.1427	-22.6198
2012-12-11 00:58:40	19.82	22.25	41254	1.99827		1.99827	-20.2039	-22.6809
2012-12-11 01:08:40	19.88	22.31	41254	2.00522		2.00522	-20.265	-22.7421
2012-12-11 01:18:40	19.9	22.32	41254.1	2.01216		2.01216	-20.2854	-22.7523
2012-12-11 01:28:40	19.95	22.38	41254.1	2.0191		2.0191	-20.3364	-22.8135
2012-12-11 01:38:40	19.89	22.32	41254.1	2.02605		2.02605	-20.2752	-22.7523
2012-12-11 01:48:40	20.02	22.44	41254.1	2.03299	41254.1	2.03299	-20.4077	-22.8746
2012-12-11 01:58:40	20.05	22.48	41254.1	2.03994		2.03994	-20.4383	-22.9154
2012-12-11 02:08:40	20.09	22.51	41254.1	2.04688		2.04688	-20.4791	-22.946
2012-12-11 02:18:40	20.13	22.56	41254.1	2.05383		2.05383	-20.5199	-22.9969
2012-12-11 02:28:40	20.13	22.56	41254.1	2.06077		2.06077	-20.5199	-22.9969
2012-12-11 02:38:40	20.2	22.63	41254.1	2.06772		2.06772	-20.5912	-23.0683
2012-12-11 02:48:40	20.25	22.69	41254.1	2.07466	41254.1	2.07466	-20.6422	-23.1295
2012-12-11 02:58:40	20.29	22.72	41254.1	2.0816		2.0816	-20.683	-23.16
2012-12-11 03:08:40	20.33	22.76	41254.1	2.08855		2.08855	-20.7238	-23.2008
2012-12-11 03:18:40	20.25	22.67	41254.1	2.09549		2.09549	-20.6422	-23.1091
2012-12-11 03:28:40	20.29	22.7	41254.1	2.10244		2.10244	-20.683	-23.1397
2012-12-11 03:38:40	20.33	22.75	41254.2	2.10938		2.10938	-20.7238	-23.1906
2012-12-11 03:48:40	20.38	22.78	41254.2	2.11633	41254.2	2.11633	-20.7747	-23.2212
2012-12-11 03:58:40	20.41	22.83	41254.2	2.12327		2.12327	-20.8053	-23.2722
2012-12-11 04:08:40	20.43	22.85	41254.2	2.13022		2.13022	-20.8257	-23.2926
2012-12-11 04:18:40	20.48	22.9	41254.2	2.13716		2.13716	-20.8767	-23.3435
2012-12-11 04:28:40	20.53	22.95	41254.2	2.1441		2.1441	-20.9276	-23.3945
2012-12-11 04:38:40	20.54	22.96	41254.2	2.15105		2.15105	-20.9378	-23.4047
2012-12-11 04:48:40	20.55	22.98	41254.2	2.15799	41254.2	2.15799	-20.948	-23.4251
2012-12-11 04:58:40	20.48	22.88	41254.2	2.16494		2.16494	-20.8767	-23.3231
2012-12-11 05:08:40	20.61	23.03	41254.2	2.17188		2.17188	-21.0092	-23.476
2012-12-11 05:18:40	20.68	23.08	41254.2	2.17883		2.17883	-21.0805	-23.527
2012-12-11 05:28:40	20.69	23.1	41254.2	2.18577		2.18577	-21.0907	-23.5474
2012-12-11 05:38:40	20.75	23.17	41254.2	2.19272		2.19272	-21.1519	-23.6188
2012-12-11 05:48:40	20.45	22.87	41254.2	2.19966	41254.2	2.19966	-20.8461	-23.3129
2012-12-11 05:58:40	20.68	23.09	41254.2	2.2066		2.2066	-21.0805	-23.5372
2012-12-11 06:08:40	20.73	23.16	41254.3	2.21355		2.21355	-21.1315	-23.6086
2012-12-11 06:18:40	20.78	23.21	41254.3	2.22049		2.22049	-21.1825	-23.6595
2012-12-11 06:28:40	20.76	23.17	41254.3	2.22744		2.22744	-21.1621	-23.6188
2012-12-11 06:38:40	20.82	23.24	41254.3	2.23438		2.23438	-21.2232	-23.6901
2012-12-11 06:48:40	20.86	23.27	41254.3	2.24133	41254.3	2.24133	-21.264	-23.7207
2012-12-11 06:58:40	20.88	23.31	41254.3	2.24827		2.24827	-21.2844	-23.7615
2012-12-11 07:08:40	20.95	23.37	41254.3	2.25522		2.25522	-21.3558	-23.8226
2012-12-11 07:18:40	20.87	23.28	41254.3	2.26216		2.26216	-21.2742	-23.7309
2012-12-11 07:28:40	21.02	23.44	41254.3	2.2691		2.2691	-21.4271	-23.894
2012-12-11 07:38:40	21.01	23.4	41254.3	2.27605		2.27605	-21.4169	-23.8532
2012-12-11 07:48:40	21.05	23.47	41254.3	2.28299	41254.3	2.28299	-21.4577	-23.9246
2012-12-11 07:58:40	21.1	23.52	41254.3	2.28994		2.28994	-21.5087	-23.9755
2012-12-11 08:08:40	21.14	23.55	41254.3	2.29688		2.29688	-21.5494	-24.0061
2012-12-11 08:18:40	21.19	23.6	41254.3	2.30383		2.30383	-21.6004	-24.0571
2012-12-11 08:28:40	20.91	23.31	41254.4	2.31077		2.31077	-21.315	-23.7615
2012-12-11 08:38:40	21.19	23.6	41254.4	2.31772		2.31772	-21.6004	-24.0571
2012-12-11 08:48:40	21.2	23.63	41254.4	2.32466	41254.4	2.32466	-21.6106	-24.0877
2012-12-11 08:58:40	21.25	23.67	41254.4	2.3316		2.3316	-21.6616	-24.1284
2012-12-11 09:08:40	21.27	23.7	41254.4	2.33855		2.33855	-21.682	-24.159
2012-12-11 09:18:40	21.31	23.73	41254.4	2.34549		2.34549	-21.7227	-24.1896
2012-12-11 09:28:40	21.35	23.76	41254.4	2.35244		2.35244	-21.7635	-24.2202
2012-12-11 09:38:40	21.39	23.78	41254.4	2.35938		2.35938	-21.8043	-24.2406
2012-12-11 09:48:40	21.41	23.82	41254.4	2.36633	41254.4	2.36633	-21.8247	-24.2813
2012-12-11 09:58:40	21.45	23.87	41254.4	2.37327		2.37327	-21.8654	-24.3323
2012-12-11 10:08:40	21.35	23.75	41254.4	2.38022		2.38022	-21.7635	-24.21
2012-12-11 10:18:40	21.46	23.88	41254.4	2.38716		2.38716	-21.8756	-24.3425
2012-12-11 10:28:40	21.5	23.92	41254.4	2.3941		2.3941	-21.9164	-24.3833
2012-12-11 10:38:40	21.52	23.95	41254.4	2.40105		2.40105	-21.9368	-24.4139
2012-12-11 10:48:40	21.53	23.96	41254.5	2.40799	41254.5	2.40799	-21.947	-24.4241
2012-12-11 10:58:40	21.58	24	41254.5	2.41494		2.41494	-21.998	-24.4648
2012-12-11 11:08:40	21.58	24	41254.5	2.42188		2.42188	-21.998	-24.4648
2012-12-11 11:18:40	21.65	24.08	41254.5	2.42883		2.42883	-22.0693	-24.5464
2012-12-11 11:28:40	21.7	24.11	41254.5	2.43577		2.43577	-22.1203	-24.577
2012-12-11 11:38:40	21.64	24.06	41254.5	2.44272		2.44272	-22.0591	-24.526
2012-12-11 11:48:40	21.72	24.12	41254.5	2.44966	41254.5	2.44966	-22.1407	-24.5872
2012-12-11 11:58:40	21.33	23.77	41254.5	2.4566		2.4566	-21.7431	-24.2304
2012-12-11 12:08:40	21.59	24.03	41254.5	2.46355		2.46355	-22.0082	-24.4954
2012-12-11 12:18:40	21.82	24.24	41254.5	2.47049		2.47049	-22.2426	-24.7095
2012-12-11 12:28:40	21.83	24.27	41254.5	2.47744		2.47744	-22.2528	-24.7401
2012-12-11 12:38:40	21.82	24.25	41254.5	2.48438		2.48438	-22.2426	-24.7197
2012-12-11 12:48:40	21.79	24.21	41254.5	2.49133	41254.5	2.49133	-22.212	-24.6789
2012-12-11 12:58:40	21.9	24.34	41254.5	2.49827		2.49827	-22.3242	-24.8114
2012-12-11 13:08:40	21.95	24.38	41254.5	2.50522		2.50522	-22.3751	-24.8522
2012-12-11 13:18:40	21.97	24.4	41254.6	2.51216		2.51216	-22.3955	-24.8726
2012-12-11 13:28:40	21.93	24.37	41254.6	2.5191		2.5191	-22.3547	-24.842
2012-12-11 13:38:40	21.81	24.23	41254.6	2.52605		2.52605	-22.2324	-24.6993
2012-12-11 13:48:40	21.98	24.42	41254.6	2.53299	41254.6	2.53299	-22.4057	-24.893
2012-12-11 13:58:40	22.04	24.48	41254.6	2.53994		2.53994	-22.4669	-24.9541
2012-12-11 14:08:40	22.09	24.52	41254.6	2.54688		2.54688	-22.5178	-24.9949
2012-12-11 14:18:40	22.12	24.54	41254.6	2.55383		2.55383	-22.5484	-25.0153
2012-12-11 14:28:40	22.12	24.55	41254.6	2.56077		2.56077	-22.5484	-25.0255
2012-12-11 14:38:40	22.15	24.58	41254.6	2.56772		2.56772	-22.579	-25.0561
2012-12-11 14:48:40	22.19	24.61	41254.6	2.57466	41254.6	2.57466	-22.6198	-25.0866
2012-12-11 14:58:40	22.24	24.67	41254.6	2.5816		2.5816	-22.6707	-25.1478
2012-12-11 15:08:40	22.28	24.72	41254.6	2.58855		2.58855	-22.7115	-25.1988
2012-12-11 15:18:40	22.28	24.72	41254.6	2.59549		2.59549	-22.7115	-25.1988
2012-12-11 15:28:40	22.36	24.79	41254.6	2.60244		2.60244	-22.7931	-25.2701
2012-12-11 15:38:40	22.38	24.81	41254.7	2.60938		2.60938	-22.8135	-25.2905
2012-12-11 15:48:40	22.43	24.86	41254.7	2.61633	41254.7	2.61633	-22.8644	-25.3415
2012-12-11 15:58:40	22.35	24.75	41254.7	2.62327		2.62327	-22.7829	-25.2294
2012-12-11 16:08:40	22.34	24.75	41254.7	2.63022		2.63022	-22.7727	-25.2294
2012-12-11 16:18:40	22.39	24.79	41254.7	2.63716		2.63716	-22.8236	-25.2701
2012-12-11 16:28:40	22.45	24.86	41254.7	2.6441		2.6441	-22.8848	-25.3415
2012-12-11 16:38:40	22.48	24.88	41254.7	2.65105		2.65105	-22.9154	-25.3619
2012-12-11 16:48:40	22.51	24.93	41254.7	2.65799	41254.7	2.65799	-22.946	-25.4128
2012-12-11 16:58:40	22.48	24.91	41254.7	2.66494		2.66494	-22.9154	-25.3925
2012-12-11 17:08:40	22.51	24.94	41254.7	2.67188		2.67188	-22.946	-25.423
2012-12-11 17:18:40	22.21	24.3	41254.7	2.67883		2.67883	-22.6402	-24.7706
2012-12-11 17:28:40	21.83	24.28	41254.7	2.68577		2.68577	-22.2528	-24.7503
2012-12-11 17:38:40	22.1	24.54	41254.7	2.69272		2.69272	-22.528	-25.0153
2012-12-11 17:48:40	22.34	24.78	41254.7	2.69966	41254.7	2.69966	-22.7727	-25.2599
2012-12-11 17:58:40	22.52	24.95	41254.7	2.7066		2.7066	-22.9562	-25.4332
2012-12-11 18:08:40	22.6	25.06	41254.8	2.71355		2.71355	-23.0377	-25.5454
2012-12-11 18:18:40	22.67	25.08	41254.8	2.72049		2.72049	-23.1091	-25.5657
2012-12-11 18:28:40	22.7	25.13	41254.8	2.72744		2.72744	-23.1397	-25.6167
2012-12-11 18:38:40	22.69	25.11	41254.8	2.73438		2.73438	-23.1295	-25.5963
2012-12-11 18:48:40	22.8	25.22	41254.8	2.74133	41254.8	2.74133	-23.2416	-25.7085
2012-12-11 18:58:40	22.84	25.26	41254.8	2.74827		2.74827	-23.2824	-25.7492
2012-12-11 19:08:40	22.88	25.3	41254.8	2.75522		2.75522	-23.3231	-25.79
2012-12-11 19:18:40	22.96	25.37	41254.8	2.76216		2.76216	-23.4047	-25.8614
2012-12-11 19:28:40	22.98	25.4	41254.8	2.7691		2.7691	-23.4251	-25.8919
2012-12-11 19:38:40	22.99	25.41	41254.8	2.77605		2.77605	-23.4353	-25.9021
2012-12-11 19:48:40	23.05	25.48	41254.8	2.78299	41254.8	2.78299	-23.4964	-25.9735
2012-12-11 19:58:40	23.12	25.54	41254.8	2.78994		2.78994	-23.5678	-26.0347
2012-12-11 20:08:40	23.19	25.61	41254.8	2.79688		2.79688	-23.6391	-26.106
2012-12-11 20:18:40	23.23	25.66	41254.8	2.80383		2.80383	-23.6799	-26.157
2012-12-11 20:28:40	23.28	25.71	41254.9	2.81077		2.81077	-23.7309	-26.208
2012-12-11 20:38:40	23.34	25.77	41254.9	2.81772		2.81772	-23.792	-26.2691
2012-12-11 20:48:40	23.38	25.8	41254.9	2.82466	41254.9	2.82466	-23.8328	-26.2997
2012-12-11 20:58:40	23.44	25.86	41254.9	2.8316		2.8316	-23.894	-26.3609
2012-12-11 21:08:40	23.47	25.87	41254.9	2.83855		2.83855	-23.9246	-26.371
2012-12-11 21:18:40	23.54	25.97	41254.9	2.84549		2.84549	-23.9959	-26.473
2012-12-11 21:28:40	23.58	26	41254.9	2.85244		2.85244	-24.0367	-26.5036
2012-12-11 21:38:40	23.58	25.99	41254.9	2.85938		2.85938	-24.0367	-26.4934
2012-12-11 21:48:40	23.57	26	41254.9	2.86633	41254.9	2.86633	-24.0265	-26.5036
2012-12-11 21:58:40	23.55	25.98	41254.9	2.87327		2.87327	-24.0061	-26.4832
2012-12-11 22:08:40	23.7	26.12	41254.9	2.88022		2.88022	-24.159	-26.6259
2012-12-11 22:18:40	23.74	26.17	41254.9	2.88716		2.88716	-24.1998	-26.6769
2012-12-11 22:28:40	23.78	26.21	41254.9	2.8941		2.8941	-24.2406	-26.7176
2012-12-11 22:38:40	23.83	26.26	41254.9	2.90105		2.90105	-24.2915	-26.7686
2012-12-11 22:48:40	23.86	26.29	41255	2.90799	41255	2.90799	-24.3221	-26.7992
2012-12-11 22:58:40	23.94	26.37	41255	2.91494		2.91494	-24.4037	-26.8807
2012-12-11 23:08:40	23.97	26.38	41255	2.92188		2.92188	-24.4343	-26.8909
2012-12-11 23:18:40	23.93	26.39	41255	2.92883		2.92883	-24.3935	-26.9011
2012-12-11 23:28:40	24.03	26.47	41255	2.93577		2.93577	-24.4954	-26.9827
2012-12-11 23:38:40	24.06	26.5	41255	2.94272		2.94272	-24.526	-27.0133
2012-12-11 23:48:40	24.12	26.56	41255	2.94966	41255	2.94966	-24.5872	-27.0744
2012-12-11 23:58:40	24.18	26.62	41255	2.9566		2.9566	-24.6483	-27.1356
2012-12-12 00:08:40	24.21	26.64	41255	2.96355		2.96355	-24.6789	-27.156
2012-12-12 00:18:40	24.25	26.69	41255	2.97049		2.97049	-24.7197	-27.2069
2012-12-12 00:28:40	24.3	26.74	41255	2.97744		2.97744	-24.7706	-27.2579
2012-12-12 00:38:40	24.34	26.77	41255	2.98438		2.98438	-24.8114	-27.2885
2012-12-12 00:48:40	24.39	26.83	41255	2.99133	41255	2.99133	-24.8624	-27.3496
2012-12-12 00:58:40	24.42	26.85	41255	2.99827		2.99827	-24.893	-27.37
2012-12-12 01:08:40	24.48	26.9	41255	3.00522		3.00522	-24.9541	-27.421
2012-12-12 01:18:40	24.5	26.94	41255.1	3.01216		3.01216	-24.9745	-27.4618
2012-12-12 01:28:40	24.45	26.89	41255.1	3.0191		3.0191	-24.9235	-27.4108
2012-12-12 01:38:40	24.54	26.97	41255.1	3.02605		3.02605	-25.0153	-27.4924
2012-12-12 01:48:40	24.54	26.97	41255.1	3.03299	41255.1	3.03299	-25.0153	-27.4924
2012-12-12 01:58:40	24.6	27.03	41255.1	3.03994		3.03994	-25.0765	-27.5535
2012-12-12 02:08:40	24.64	27.08	41255.1	3.04688		3.04688	-25.1172	-27.6045
2012-12-12 02:18:40	24.67	27.12	41255.1	3.05383		3.05383	-25.1478	-27.6453
2012-12-12 02:28:40	24.68	27.12	41255.1	3.06077		3.06077	-25.158	-27.6453
2012-12-12 02:38:40	24.74	27.18	41255.1	3.06772		3.06772	-25.2192	-27.7064
2012-12-12 02:48:40	24.79	27.2	41255.1	3.07466	41255.1	3.07466	-25.2701	-27.7268
2012-12-12 02:58:40	24.82	27.26	41255.1	3.0816		3.0816	-25.3007	-27.788
2012-12-12 03:08:40	24.82	27.26	41255.1	3.08855		3.08855	-25.3007	-27.788
2012-12-12 03:18:40	24.92	27.36	41255.1	3.09549		3.09549	-25.4027	-27.8899
2012-12-12 03:28:40	24.98	27.41	41255.1	3.10244		3.10244	-25.4638	-27.9409
2012-12-12 03:38:40	25	27.44	41255.2	3.10938		3.10938	-25.4842	-27.9715
2012-12-12 03:48:40	25.02	27.46	41255.2	3.11633	41255.2	3.11633	-25.5046	-27.9918
2012-12-12 03:58:40	25.08	27.5	41255.2	3.12327		3.12327	-25.5657	-28.0326
2012-12-12 04:08:40	25.1	27.53	41255.2	3.13022		3.13022	-25.5861	-28.0632
2012-12-12 04:18:40	25.13	27.57	41255.2	3.13716		3.13716	-25.6167	-28.104
2012-12-12 04:28:40	25.13	27.57	41255.2	3.1441		3.1441	-25.6167	-28.104
2012-12-12 04:38:40	25.16	27.61	41255.2	3.15105		3.15105	-25.6473	-28.1448
2012-12-12 04:48:40	25.21	27.64	41255.2	3.15799	41255.2	3.15799	-25.6983	-28.1753
2012-12-12 04:58:40	25.25	27.69	41255.2	3.16494		3.16494	-25.739	-28.2263
2012-12-12 05:08:40	25.28	27.71	41255.2	3.17188		3.17188	-25.7696	-28.2467
2012-12-12 05:18:40	25.28	27.73	41255.2	3.17883		3.17883	-25.7696	-28.2671
2012-12-12 05:28:40	25.3	27.76	41255.2	3.18577		3.18577	-25.79	-28.2977
2012-12-12 05:38:40	25.34	27.78	41255.2	3.19272		3.19272	-25.8308	-28.318
2012-12-12 05:48:40	25.33	27.77	41255.2	3.19966	41255.2	3.19966	-25.8206	-28.3078
2012-12-12 05:58:40	25.38	27.83	41255.2	3.2066		3.2066	-25.8716	-28.369
2012-12-12 06:08:40	25.42	27.87	41255.3	3.21355		3.21355	-25.9123	-28.4098
2012-12-12 06:18:40	25.47	27.91	41255.3	3.22049		3.22049	-25.9633	-28.4506
2012-12-12 06:28:40	25.52	27.96	41255.3	3.22744		3.22744	-26.0143	-28.5015
2012-12-12 06:38:40	25.55	28	41255.3	3.23438		3.23438	-26.0449	-28.5423
2012-12-12 06:48:40	25.59	28.03	41255.3	3.24133	41255.3	3.24133	-26.0856	-28.5729
2012-12-12 06:58:40	25.63	28.07	41255.3	3.24827		3.24827	-26.1264	-28.6137
2012-12-12 07:08:40	25.67	28.11	41255.3	3.25522		3.25522	-26.1672	-28.6544
2012-12-12 07:18:40	25.72	28.17	41255.3	3.26216		3.26216	-26.2181	-28.7156
2012-12-12 07:28:40	25.77	28.2	41255.3	3.2691		3.2691	-26.2691	-28.7462
2012-12-12 07:38:40	25.79	28.22	41255.3	3.27605		3.27605	-26.2895	-28.7666
2012-12-12 07:48:40	25.83	28.28	41255.3	3.28299	41255.3	3.28299	-26.3303	-28.8277
2012-12-12 07:58:40	25.89	28.33	41255.3	3.28994		3.28994	-26.3914	-28.8787
2012-12-12 08:08:40	25.93	28.37	41255.3	3.29688		3.29688	-26.4322	-28.9195
2012-12-12 08:18:40	25.95	28.39	41255.3	3.30383		3.30383	-26.4526	-28.9399
2012-12-12 08:28:40	25.99	28.44	41255.4	3.31077		3.31077	-26.4934	-28.9908
2012-12-12 08:38:40	26	28.44	41255.4	3.31772		3.31772	-26.5036	-28.9908
2012-12-12 08:48:40	26.04	28.5	41255.4	3.32466	41255.4	3.32466	-26.5443	-29.052
2012-12-12 08:58:40	26.09	28.53	41255.4	3.3316		3.3316	-26.5953	-29.0826
2012-12-12 09:08:40	26.12	28.55	41255.4	3.33855		3.33855	-26.6259	-29.103
2012-12-12 09:18:40	26.13	28.58	41255.4	3.34549		3.34549	-26.6361	-29.1335
2012-12-12 09:28:40	26.02	28.46	41255.4	3.35244		3.35244	-26.524	-29.0112
2012-12-12 09:38:40	26.14	28.59	41255.4	3.35938		3.35938	-26.6463	-29.1437
2012-12-12 09:48:40	26.18	28.61	41255.4	3.36633	41255.4	3.36633	-26.6871	-29.1641
2012-12-12 09:58:40	26.26	28.7	41255.4	3.37327		3.37327	-26.7686	-29.2559
2012-12-12 10:08:40	26.28	28.7	41255.4	3.38022		3.38022	-26.789	-29.2559
2012-12-12 10:18:40	26.31	28.74	41255.4	3.38716		3.38716	-26.8196	-29.2966
2012-12-12 10:28:40	26.34	28.78	41255.4	3.3941		3.3941	-26.8502	-29.3374
2012-12-12 10:38:40	26.4	28.84	41255.4	3.40105		3.40105	-26.9113	-29.3986
2012-12-12 10:48:40	26.44	28.86	41255.5	3.40799	41255.5	3.40799	-26.9521	-29.419
2012-12-12 10:58:40	26.48	28.91	41255.5	3.41494		3.41494	-26.9929	-29.4699
2012-12-12 11:08:40	26.52	28.94	41255.5	3.42188		3.42188	-27.0336	-29.5005
2012-12-12 11:18:40	26.46	28.89	41255.5	3.42883		3.42883	-26.9725	-29.4495
2012-12-12 11:28:40	26.53	28.94	41255.5	3.43577		3.43577	-27.0438	-29.5005
2012-12-12 11:38:40	26.57	29	41255.5	3.44272		3.44272	-27.0846	-29.5617
2012-12-12 11:48:40	26.57	29	41255.5	3.44966	41255.5	3.44966	-27.0846	-29.5617
2012-12-12 11:58:40	26.61	29.05	41255.5	3.4566		3.4566	-27.1254	-29.6126
2012-12-12 12:08:40	26.63	29.06	41255.5	3.46355		3.46355	-27.1458	-29.6228
2012-12-12 12:18:40	26.68	29.1	41255.5	3.47049		3.47049	-27.1967	-29.6636
2012-12-12 12:28:40	26.71	29.14	41255.5	3.47744		3.47744	-27.2273	-29.7044
2012-12-12 12:38:40	26.73	29.16	41255.5	3.48438		3.48438	-27.2477	-29.7248
2012-12-12 12:48:40	26.76	29.19	41255.5	3.49133	41255.5	3.49133	-27.2783	-29.7554
2012-12-12 12:58:40	26.81	29.25	41255.5	3.49827		3.49827	-27.3293	-29.8165
2012-12-12 13:08:40	26.86	29.28	41255.5	3.50522		3.50522	-27.3802	-29.8471
2012-12-12 13:18:40	26.89	29.3	41255.6	3.51216		3.51216	-27.4108	-29.8675
2012-12-12 13:28:40	26.91	29.33	41255.6	3.5191		3.5191	-27.4312	-29.8981
2012-12-12 13:38:40	26.96	29.38	41255.6	3.52605		3.52605	-27.4822	-29.949
2012-12-12 13:48:40	26.9	29.33	41255.6	3.53299	41255.6	3.53299	-27.421	-29.8981
2012-12-12 13:58:40	26.94	29.36	41255.6	3.53994		3.53994	-27.4618	-29.9286
2012-12-12 14:08:40	27.01	29.43	41255.6	3.54688		3.54688	-27.5331	-30
2012-12-12 14:18:40	27.04	29.46	41255.6	3.55383		3.55383	-27.5637	-30.0306
2012-12-12 14:28:40	27.09	29.52	41255.6	3.56077		3.56077	-27.6147	-30.0917
2012-12-12 14:38:40	27.14	29.56	41255.6	3.56772		3.56772	-27.6656	-30.1325
2012-12-12 14:48:40	27.13	29.56	41255.6	3.57466	41255.6	3.57466	-27.6555	-30.1325
2012-12-12 14:58:40	27.19	29.61	41255.6	3.5816		3.5816	-27.7166	-30.1835
2012-12-12 15:08:40	27.2	29.63	41255.6	3.58855		3.58855	-27.7268	-30.2039
2012-12-12 15:18:40	27.27	29.69	41255.6	3.59549		3.59549	-27.7982	-30.265
2012-12-12 15:28:40	27.28	29.72	41255.6	3.60244		3.60244	-27.8084	-30.2956
2012-12-12 15:38:40	27.34	29.76	41255.7	3.60938		3.60938	-27.8695	-30.3364
2012-12-12 15:48:40	27.41	29.83	41255.7	3.61633	41255.7	3.61633	-27.9409	-30.4077
2012-12-12 15:58:40	27.44	29.86	41255.7	3.62327		3.62327	-27.9715	-30.4383
2012-12-12 16:08:40	27.48	29.91	41255.7	3.63022		3.63022	-28.0122	-30.4893
2012-12-12 16:18:40	27.51	29.93	41255.7	3.63716		3.63716	-28.0428	-30.5097
2012-12-12 16:28:40	27.53	29.97	41255.7	3.6441		3.6441	-28.0632	-30.5505
2012-12-12 16:38:40	27.55	29.95	41255.7	3.65105		3.65105	-28.0836	-30.5301
2012-12-12 16:48:40	27.63	30.05	41255.7	3.65799	41255.7	3.65799	-28.1651	-30.632
2012-12-12 16:58:40	27.65	30.07	41255.7	3.66494		3.66494	-28.1855	-30.6524
2012-12-12 17:08:40	27.57	29.98	41255.7	3.67188		3.67188	-28.104	-30.5607
2012-12-12 17:18:40	27.62	30.03	41255.7	3.67883		3.67883	-28.1549	-30.6116
2012-12-12 17:28:40	27.69	30.09	41255.7	3.68577		3.68577	-28.2263	-30.6728
2012-12-12 17:38:40	27.71	30.15	41255.7	3.69272		3.69272	-28.2467	-30.7339
2012-12-12 17:48:40	27.66	30.08	41255.7	3.69966	41255.7	3.69966	-28.1957	-30.6626
2012-12-12 17:58:40	27.69	30.11	41255.7	3.7066		3.7066	-28.2263	-30.6932
2012-12-12 18:08:40	27.76	30.18	41255.8	3.71355		3.71355	-28.2977	-30.7645
2012-12-12 18:18:40	27.78	30.21	41255.8	3.72049		3.72049	-28.318	-30.7951
2012-12-12 18:28:40	27.83	30.25	41255.8	3.72744		3.72744	-28.369	-30.8359
2012-12-12 18:38:40	27.86	30.28	41255.8	3.73438		3.73438	-28.3996	-30.8665
2012-12-12 18:48:40	27.87	30.28	41255.8	3.74133	41255.8	3.74133	-28.4098	-30.8665
2012-12-12 18:58:40	27.9	30.32	41255.8	3.74827		3.74827	-28.4404	-30.9072
2012-12-12 19:08:40	27.91	30.33	41255.8	3.75522		3.75522	-28.4506	-30.9174
2012-12-12 19:18:40	27.99	30.41	41255.8	3.76216		3.76216	-28.5321	-30.999
2012-12-12 19:28:40	28.04	30.45	41255.8	3.7691		3.7691	-28.5831	-31.0398
2012-12-12 19:38:40	28.1	30.52	41255.8	3.77605		3.77605	-28.6442	-31.1111
2012-12-12 19:48:40	28.13	30.55	41255.8	3.78299	41255.8	3.78299	-28.6748	-31.1417
2012-12-12 19:58:40	28.17	30.59	41255.8	3.78994		3.78994	-28.7156	-31.1825
2012-12-12 20:08:40	28.22	30.63	41255.8	3.79688		3.79688	-28.7666	-31.2232
2012-12-12 20:18:40	28.19	30.62	41255.8	3.80383		3.80383	-28.736	-31.213
2012-12-12 20:28:40	28.25	30.67	41255.9	3.81077		3.81077	-28.7971	-31.264
2012-12-12 20:38:40	28.29	30.69	41255.9	3.81772		3.81772	-28.8379	-31.2844
2012-12-12 20:48:40	28.32	30.74	41255.9	3.82466	41255.9	3.82466	-28.8685	-31.3354
2012-12-12 20:58:40	28.37	30.79	41255.9	3.8316		3.8316	-28.9195	-31.3863
2012-12-12 21:08:40	28.42	30.84	41255.9	3.83855		3.83855	-28.9704	-31.4373
2012-12-12 21:18:40	28.44	30.85	41255.9	3.84549		3.84549	-28.9908	-31.4475
2012-12-12 21:28:40	28.5	30.92	41255.9	3.85244		3.85244	-29.052	-31.5189
2012-12-12 21:38:40	28.54	30.96	41255.9	3.85938		3.85938	-29.0928	-31.5596
2012-12-12 21:48:40	28.6	31.02	41255.9	3.86633	41255.9	3.86633	-29.1539	-31.6208
2012-12-12 21:58:40	28.63	31.05	41255.9	3.87327		3.87327	-29.1845	-31.6514
2012-12-12 22:08:40	28.69	31.11	41255.9	3.88022		3.88022	-29.2457	-31.7125
2012-12-12 22:18:40	28.73	31.15	41255.9	3.88716		3.88716	-29.2864	-31.7533
2012-12-12 22:28:40	28.77	31.19	41255.9	3.8941		3.8941	-29.3272	-31.7941
2012-12-12 22:38:40	28.78	31.22	41255.9	3.90105		3.90105	-29.3374	-31.8247
2012-12-12 22:48:40	28.8	31.22	41256	3.90799	41256	3.90799	-29.3578	-31.8247
2012-12-12 22:58:40	28.85	31.26	41256	3.91494		3.91494	-29.4088	-31.8654
2012-12-12 23:08:40	28.89	31.3	41256	3.92188		3.92188	-29.4495	-31.9062
2012-12-12 23:18:40	28.93	31.36	41256	3.92883		3.92883	-29.4903	-31.9674
2012-12-12 23:28:40	28.98	31.4	41256	3.93577		3.93577	-29.5413	-32.0082
2012-12-12 23:38:40	29	31.43	41256	3.94272		3.94272	-29.5617	-32.0387
2012-12-12 23:48:40	29.05	31.48	41256	3.94966	41256	3.94966	-29.6126	-32.0897
2012-12-12 23:58:40	29.09	31.51	41256	3.9566		3.9566	-29.6534	-32.1203
2012-12-13 00:08:40	29.13	31.56	41256	3.96355		3.96355	-29.6942	-32.1713
2012-12-13 00:18:40	29.19	31.63	41256	3.97049		3.97049	-29.7554	-32.2426
2012-12-13 00:28:40	29.21	31.64	41256	3.97744		3.97744	-29.7757	-32.2528
2012-12-13 00:38:40	29.26	31.69	41256	3.98438		3.98438	-29.8267	-32.3038
2012-12-13 00:48:40	29.33	31.75	41256	3.99133	41256	3.99133	-29.8981	-32.3649
2012-12-13 00:58:40	29.37	31.8	41256	3.99827		3.99827	-29.9388	-32.4159
2012-12-13 01:08:40	29.39	31.82	41256	4.00522		4.00522	-29.9592	-32.4363
2012-12-13 01:18:40	29.42	31.85	41256.1	4.01216		4.01216	-29.9898	-32.4669
2012-12-13 01:28:40	29.47	31.9	41256.1	4.0191		4.0191	-30.0408	-32.5178
2012-12-13 01:38:40	29.54	31.96	41256.1	4.02605		4.02605	-30.1121	-32.579
2012-12-13 01:48:40	29.56	31.98	41256.1	4.03299	41256.1	4.03299	-30.1325	-32.5994
2012-12-13 01:58:40	29.61	32.01	41256.1	4.03994		4.03994	-30.1835	-32.63
2012-12-13 02:08:40	29.64	32.06	41256.1	4.04688		4.04688	-30.2141	-32.6809
2012-12-13 02:18:40	29.68	32.09	41256.1	4.05383		4.05383	-30.2548	-32.7115
2012-12-13 02:28:40	29.73	32.16	41256.1	4.06077		4.06077	-30.3058	-32.7829
2012-12-13 02:38:40	29.78	32.21	41256.1	4.06772		4.06772	-30.3568	-32.8338
2012-12-13 02:48:40	29.8	32.23	41256.1	4.07466	41256.1	4.07466	-30.3772	-32.8542
2012-12-13 02:58:40	29.88	32.3	41256.1	4.0816		4.0816	-30.4587	-32.9256
2012-12-13 03:08:40	29.9	32.34	41256.1	4.08855		4.08855	-30.4791	-32.9664
2012-12-13 03:18:40	29.93	32.35	41256.1	4.09549		4.09549	-30.5097	-32.9766
2012-12-13 03:28:40	29.99	32.42	41256.1	4.10244		4.10244	-30.5708	-33.0479
2012-12-13 03:38:40	30.01	32.43	41256.2	4.10938		4.10938	-30.5912	-33.0581
2012-12-13 03:48:40	30.05	32.48	41256.2	4.11633	41256.2	4.11633	-30.632	-33.1091
2012-12-13 03:58:40	30.1	32.52	41256.2	4.12327		4.12327	-30.683	-33.1498
2012-12-13 04:08:40	30.14	32.56	41256.2	4.13022		4.13022	-30.7238	-33.1906
2012-12-13 04:18:40	30.19	32.61	41256.2	4.13716		4.13716	-30.7747	-33.2416
2012-12-13 04:28:40	30.21	32.64	41256.2	4.1441		4.1441	-30.7951	-33.2722
2012-12-13 04:38:40	30.27	32.69	41256.2	4.15105		4.15105	-30.8563	-33.3231
2012-12-13 04:48:40	30.29	32.72	41256.2	4.15799	41256.2	4.15799	-30.8767	-33.3537
2012-12-13 04:58:40	30.34	32.76	41256.2	4.16494		4.16494	-30.9276	-33.3945
2012-12-13 05:08:40	30.37	32.8	41256.2	4.17188		4.17188	-30.9582	-33.4353
2012-12-13 05:18:40	30.43	32.84	41256.2	4.17883		4.17883	-31.0194	-33.476
2012-12-13 05:28:40	30.46	32.89	41256.2	4.18577		4.18577	-31.0499	-33.527
2012-12-13 05:38:40	30.54	32.95	41256.2	4.19272		4.19272	-31.1315	-33.5882
2012-12-13 05:48:40	30.56	32.98	41256.2	4.19966	41256.2	4.19966	-31.1519	-33.6188
2012-12-13 05:58:40	30.59	33.01	41256.2	4.2066		4.2066	-31.1825	-33.6493
2012-12-13 06:08:40	30.61	33.04	41256.3	4.21355		4.21355	-31.2029	-33.6799
2012-12-13 06:18:40	30.66	33.09	41256.3	4.22049		4.22049	-31.2538	-33.7309
2012-12-13 06:28:40	30.67	33.11	41256.3	4.22744		4.22744	-31.264	-33.7513
2012-12-13 06:38:40	30.76	33.18	41256.3	4.23438		4.23438	-31.3558	-33.8226
2012-12-13 06:48:40	30.8	33.23	41256.3	4.24133	41256.3	4.24133	-31.3965	-33.8736
2012-12-13 06:58:40	30.85	33.28	41256.3	4.24827		4.24827	-31.4475	-33.9246
2012-12-13 07:08:40	30.85	33.27	41256.3	4.25522		4.25522	-31.4475	-33.9144
2012-12-13 07:18:40	30.93	33.36	41256.3	4.26216		4.26216	-31.5291	-34.0061
2012-12-13 07:28:40	30.99	33.41	41256.3	4.2691		4.2691	-31.5902	-34.0571
2012-12-13 07:38:40	31.04	33.45	41256.3	4.27605		4.27605	-31.6412	-34.0979
2012-12-13 07:48:40	31.09	33.51	41256.3	4.28299	41256.3	4.28299	-31.6922	-34.159
2012-12-13 07:58:40	31.12	33.54	41256.3	4.28994		4.28994	-31.7227	-34.1896
2012-12-13 08:08:40	31.16	33.58	41256.3	4.29688		4.29688	-31.7635	-34.2304
2012-12-13 08:18:40	31.2	33.62	41256.3	4.30383		4.30383	-31.8043	-34.2712
2012-12-13 08:28:40	31.21	33.64	41256.4	4.31077		4.31077	-31.8145	-34.2915
2012-12-13 08:38:40	31.29	33.72	41256.4	4.31772		4.31772	-31.896	-34.3731
2012-12-13 08:48:40	31.33	33.76	41256.4	4.32466	41256.4	4.32466	-31.9368	-34.4139
2012-12-13 08:58:40	31.4	33.83	41256.4	4.3316		4.3316	-32.0082	-34.4852
2012-12-13 09:08:40	31.42	33.84	41256.4	4.33855		4.33855	-32.0285	-34.4954
2012-12-13 09:18:40	31.5	33.9	41256.4	4.34549		4.34549	-32.1101	-34.5566
2012-12-13 09:28:40	31.54	33.96	41256.4	4.35244		4.35244	-32.1509	-34.6177
2012-12-13 09:38:40	31.57	34	41256.4	4.35938		4.35938	-32.1814	-34.6585
2012-12-13 09:48:40	31.61	34.04	41256.4	4.36633	41256.4	4.36633	-32.2222	-34.6993
2012-12-13 09:58:40	31.38	33.92	41256.4	4.37327		4.37327	-31.9878	-34.577
2012-12-13 10:08:40	31.7	34.11	41256.4	4.38022		4.38022	-32.314	-34.7706
2012-12-13 10:18:40	31.8	34.24	41256.4	4.38716		4.38716	-32.4159	-34.9032
2012-12-13 10:28:40	31.85	34.27	41256.4	4.3941		4.3941	-32.4669	-34.9337
2012-12-13 10:38:40	31.92	34.33	41256.4	4.40105		4.40105	-32.5382	-34.9949
2012-12-13 10:48:40	31.97	34.38	41256.5	4.40799	41256.5	4.40799	-32.5892	-35.0459
2012-12-13 10:58:40	32	34.42	41256.5	4.41494		4.41494	-32.6198	-35.0866
2012-12-13 11:08:40	32.05	34.47	41256.5	4.42188		4.42188	-32.6707	-35.1376
2012-12-13 11:18:40	32.12	34.54	41256.5	4.42883		4.42883	-32.7421	-35.209
2012-12-13 11:28:40	32.16	34.58	41256.5	4.43577		4.43577	-32.7829	-35.2497
2012-12-13 11:38:40	32.21	34.64	41256.5	4.44272		4.44272	-32.8338	-35.3109
2012-12-13 11:48:40	32.27	34.68	41256.5	4.44966	41256.5	4.44966	-32.895	-35.3517
2012-12-13 11:58:40	32.33	34.74	41256.5	4.4566		4.4566	-32.9562	-35.4128
2012-12-13 12:08:40	32.35	34.77	41256.5	4.46355		4.46355	-32.9766	-35.4434
2012-12-13 12:18:40	32.42	34.84	41256.5	4.47049		4.47049	-33.0479	-35.5148
2012-12-13 12:28:40	32.47	34.88	41256.5	4.47744		4.47744	-33.0989	-35.5556
2012-12-13 12:38:40	32.52	34.93	41256.5	4.48438		4.48438	-33.1498	-35.6065
2012-12-13 12:48:40	32.56	34.98	41256.5	4.49133	41256.5	4.49133	-33.1906	-35.6575
2012-12-13 12:58:40	32.55	34.97	41256.5	4.49827		4.49827	-33.1804	-35.6473
2012-12-13 13:08:40	32.65	35.08	41256.5	4.50522		4.50522	-33.2824	-35.7594
2012-12-13 13:18:40	32.19	34.63	41256.6	4.51216		4.51216	-32.8135	-35.3007
2012-12-13 13:28:40	32.43	34.85	41256.6	4.5191		4.5191	-33.0581	-35.525
2012-12-13 13:38:40	32.5	34.91	41256.6	4.52605		4.52605	-33.1295	-35.5861
2012-12-13 13:48:40	32.58	35	41256.6	4.53299	41256.6	4.53299	-33.211	-35.6779
2012-12-13 13:58:40	32.64	35.04	41256.6	4.53994		4.53994	-33.2722	-35.7187
2012-12-13 14:08:40	32.69	35.09	41256.6	4.54688		4.54688	-33.3231	-35.7696
2012-12-13 14:18:40	32.7	35.1	41256.6	4.55383		4.55383	-33.3333	-35.7798
2012-12-13 14:28:40	32.8	35.21	41256.6	4.56077		4.56077	-33.4353	-35.8919
2012-12-13 14:38:40	32.85	35.24	41256.6	4.56772		4.56772	-33.4862	-35.9225
2012-12-13 14:48:40	32.89	35.29	41256.6	4.57466	41256.6	4.57466	-33.527	-35.9735
2012-12-13 14:58:40	32.99	35.38	41256.6	4.5816		4.5816	-33.629	-36.0652
2012-12-13 15:08:40	33.05	35.45	41256.6	4.58855		4.58855	-33.6901	-36.1366
2012-12-13 15:18:40	33.13	35.52	41256.6	4.59549		4.59549	-33.7717	-36.208
2012-12-13 15:28:40	33.16	35.54	41256.6	4.60244		4.60244	-33.8022	-36.2283
2012-12-13 15:38:40	33.24	35.64	41256.7	4.60938		4.60938	-33.8838	-36.3303
2012-12-13 15:48:40	33.34	35.73	41256.7	4.61633	41256.7	4.61633	-33.9857	-36.422
2012-12-13 15:58:40	33.41	35.8	41256.7	4.62327		4.62327	-34.0571	-36.4934
2012-12-13 16:08:40	33.46	35.85	41256.7	4.63022		4.63022	-34.1081	-36.5443
2012-12-13 16:18:40	33.53	35.92	41256.7	4.63716		4.63716	-34.1794	-36.6157
2012-12-13 16:28:40	33.61	36	41256.7	4.6441		4.6441	-34.261	-36.6972
2012-12-13 16:38:40	33.66	36.04	41256.7	4.65105		4.65105	-34.3119	-36.738
2012-12-13 16:48:40	33.72	36.11	41256.7	4.65799	41256.7	4.65799	-34.3731	-36.8094
2012-12-13 16:58:40	33.82	36.21	41256.7	4.66494		4.66494	-34.475	-36.9113
2012-12-13 17:08:40	33.88	36.27	41256.7	4.67188		4.67188	-34.5362	-36.9725
2012-12-13 17:18:40	33.97	36.37	41256.7	4.67883		4.67883	-34.6279	-37.0744
2012-12-13 17:28:40	34.04	36.42	41256.7	4.68577		4.68577	-34.6993	-37.1254
2012-12-13 17:38:40	34.11	36.51	41256.7	4.69272		4.69272	-34.7706	-37.2171
2012-12-13 17:48:40	34.17	36.58	41256.7	4.69966	41256.7	4.69966	-34.8318	-37.2885
2012-12-13 17:58:40	34.24	36.64	41256.7	4.7066		4.7066	-34.9032	-37.3496
2012-12-13 18:08:40	34.33	36.72	41256.8	4.71355		4.71355	-34.9949	-37.4312
2012-12-13 18:18:40	34.4	36.79	41256.8	4.72049		4.72049	-35.0663	-37.5025
2012-12-13 18:28:40	34.48	36.88	41256.8	4.72744		4.72744	-35.1478	-37.5943
2012-12-13 18:38:40	34.55	36.94	41256.8	4.73438		4.73438	-35.2192	-37.6555
2012-12-13 18:48:40	34.62	37.02	41256.8	4.74133	41256.8	4.74133	-35.2905	-37.737
2012-12-13 18:58:40	34.7	37.09	41256.8	4.74827		4.74827	-35.3721	-37.8084
2012-12-13 19:08:40	34.76	37.16	41256.8	4.75522		4.75522	-35.4332	-37.8797
2012-12-13 19:18:40	34.88	37.27	41256.8	4.76216		4.76216	-35.5556	-37.9918
2012-12-13 19:28:40	34.9	37.31	41256.8	4.7691		4.7691	-35.5759	-38.0326
2012-12-13 19:38:40	34.97	37.38	41256.8	4.77605		4.77605	-35.6473	-38.104
2012-12-13 19:48:40	35.07	37.47	41256.8	4.78299	41256.8	4.78299	-35.7492	-38.1957
2012-12-13 19:58:40	35.12	37.53	41256.8	4.78994		4.78994	-35.8002	-38.2569
2012-12-13 20:08:40	35.2	37.6	41256.8	4.79688		4.79688	-35.8818	-38.3282
2012-12-13 20:18:40	35.27	37.66	41256.8	4.80383		4.80383	-35.9531	-38.3894
2012-12-13 20:28:40	35.35	37.76	41256.9	4.81077		4.81077	-36.0347	-38.4913
2012-12-13 20:38:40	35.41	37.82	41256.9	4.81772		4.81772	-36.0958	-38.5525
2012-12-13 20:48:40	35.48	37.89	41256.9	4.82466	41256.9	4.82466	-36.1672	-38.6239
2012-12-13 20:58:40	35.57	37.98	41256.9	4.8316		4.8316	-36.2589	-38.7156
2012-12-13 21:08:40	35.62	38.03	41256.9	4.83855		4.83855	-36.3099	-38.7666
2012-12-13 21:18:40	35.72	38.13	41256.9	4.84549		4.84549	-36.4118	-38.8685
2012-12-13 21:28:40	35.8	38.2	41256.9	4.85244		4.85244	-36.4934	-38.9399
2012-12-13 21:38:40	35.83	38.25	41256.9	4.85938		4.85938	-36.524	-38.9908
2012-12-13 21:48:40	35.91	38.32	41256.9	4.86633	41256.9	4.86633	-36.6055	-39.0622
2012-12-13 21:58:40	35.98	38.41	41256.9	4.87327		4.87327	-36.6769	-39.1539
2012-12-13 22:08:40	35.99	38.42	41256.9	4.88022		4.88022	-36.6871	-39.1641
2012-12-13 22:18:40	36.11	38.51	41256.9	4.88716		4.88716	-36.8094	-39.2559
2012-12-13 22:28:40	36.15	38.57	41256.9	4.8941		4.8941	-36.8502	-39.317
2012-12-13 22:38:40	36.24	38.66	41256.9	4.90105		4.90105	-36.9419	-39.4088
2012-12-13 22:48:40	36.31	38.73	41257	4.90799	41257	4.90799	-37.0133	-39.4801
2012-12-13 22:58:40	36.38	38.81	41257	4.91494		4.91494	-37.0846	-39.5617
2012-12-13 23:08:40	36.46	38.88	41257	4.92188		4.92188	-37.1662	-39.633
2012-12-13 23:18:40	36.54	38.96	41257	4.92883		4.92883	-37.2477	-39.7146
2012-12-13 23:28:40	36.59	39.03	41257	4.93577		4.93577	-37.2987	-39.7859
2012-12-13 23:38:40	36.65	39.06	41257	4.94272		4.94272	-37.3598	-39.8165
2012-12-13 23:48:40	36.74	39.16	41257	4.94966	41257	4.94966	-37.4516	-39.9185
2012-12-13 23:58:40	36.8	39.22	41257	4.9566		4.9566	-37.5127	-39.9796
2012-12-14 00:08:40	36.89	39.31	41257	4.96355		4.96355	-37.6045	-40.0714
2012-12-14 00:18:40	36.98	39.4	41257	4.97049		4.97049	-37.6962	-40.1631
2012-12-14 00:28:40	37.04	39.47	41257	4.97744		4.97744	-37.7574	-40.2345
2012-12-14 00:38:40	37.1	39.52	41257	4.98438		4.98438	-37.8186	-40.2854
2012-12-14 00:48:40	37.17	39.59	41257	4.99133	41257	4.99133	-37.8899	-40.3568
2012-12-14 00:58:40	37.27	39.7	41257	4.99827		4.99827	-37.9918	-40.4689
2012-12-14 01:08:40	37.32	39.75	41257	5.00522		5.00522	-38.0428	-40.5199
2012-12-14 01:18:40	37.4	39.82	41257.1	5.01216		5.01216	-38.1244	-40.5912
2012-12-14 01:28:40	37.47	39.9	41257.1	5.0191		5.0191	-38.1957	-40.6728
2012-12-14 01:38:40	37.56	39.98	41257.1	5.02605		5.02605	-38.2875	-40.7543
2012-12-14 01:48:40	37.62	40.05	41257.1	5.03299	41257.1	5.03299	-38.3486	-40.8257
2012-12-14 01:58:40	37.69	40.12	41257.1	5.03994		5.03994	-38.42	-40.897
2012-12-14 02:08:40	37.75	40.18	41257.1	5.04688		5.04688	-38.4811	-40.9582
2012-12-14 02:18:40	37.84	40.24	41257.1	5.05383		5.05383	-38.5729	-41.0194
2012-12-14 02:28:40	37.92	40.33	41257.1	5.06077		5.06077	-38.6544	-41.1111
2012-12-14 02:38:40	37.98	40.41	41257.1	5.06772		5.06772	-38.7156	-41.1927
2012-12-14 02:48:40	38.06	40.48	41257.1	5.07466	41257.1	5.07466	-38.7971	-41.264
2012-12-14 02:58:40	38.17	40.59	41257.1	5.0816		5.0816	-38.9093	-41.3761
2012-12-14 03:08:40	38.24	40.67	41257.1	5.08855		5.08855	-38.9806	-41.4577
2012-12-14 03:18:40	38.31	40.74	41257.1	5.09549		5.09549	-39.052	-41.5291
2012-12-14 03:28:40	38.37	40.8	41257.1	5.10244		5.10244	-39.1131	-41.5902
2012-12-14 03:38:40	38.45	40.89	41257.2	5.10938		5.10938	-39.1947	-41.682
2012-12-14 03:48:40	38.54	40.96	41257.2	5.11633	41257.2	5.11633	-39.2864	-41.7533
2012-12-14 03:58:40	38.62	41.03	41257.2	5.12327		5.12327	-39.368	-41.8247
2012-12-14 04:08:40	38.69	41.11	41257.2	5.13022		5.13022	-39.4393	-41.9062
2012-12-14 04:18:40	38.73	41.14	41257.2	5.13716		5.13716	-39.4801	-41.9368
2012-12-14 04:28:40	38.81	41.26	41257.2	5.1441		5.1441	-39.5617	-42.0591
2012-12-14 04:38:40	38.88	41.31	41257.2	5.15105		5.15105	-39.633	-42.1101
2012-12-14 04:48:40	38.96	41.38	41257.2	5.15799	41257.2	5.15799	-39.7146	-42.1814
2012-12-14 04:58:40	39.02	41.44	41257.2	5.16494		5.16494	-39.7757	-42.2426
2012-12-14 05:08:40	39.09	41.52	41257.2	5.17188		5.17188	-39.8471	-42.3242
2012-12-14 05:18:40	39.15	41.57	41257.2	5.17883		5.17883	-39.9083	-42.3751
2012-12-14 05:28:40	39.21	41.63	41257.2	5.18577		5.18577	-39.9694	-42.4363
2012-12-14 05:38:40	39.29	41.72	41257.2	5.19272		5.19272	-40.051	-42.528
2012-12-14 05:48:40	39.36	41.79	41257.2	5.19966	41257.2	5.19966	-40.1223	-42.5994
2012-12-14 05:58:40	39.43	41.86	41257.2	5.2066		5.2066	-40.1937	-42.6707
2012-12-14 06:08:40	39.47	41.93	41257.3	5.21355		5.21355	-40.2345	-42.7421
2012-12-14 06:18:40	39.56	42	41257.3	5.22049		5.22049	-40.3262	-42.8135
2012-12-14 06:28:40	39.67	42.09	41257.3	5.22744		5.22744	-40.4383	-42.9052
2012-12-14 06:38:40	39.73	42.15	41257.3	5.23438		5.23438	-40.4995	-42.9664
2012-12-14 06:48:40	39.78	42.21	41257.3	5.24133	41257.3	5.24133	-40.5505	-43.0275
2012-12-14 06:58:40	39.87	42.31	41257.3	5.24827		5.24827	-40.6422	-43.1295
2012-12-14 07:08:40	39.96	42.37	41257.3	5.25522		5.25522	-40.7339	-43.1906
2012-12-14 07:18:40	40.02	42.44	41257.3	5.26216		5.26216	-40.7951	-43.262
2012-12-14 07:28:40	40.1	42.54	41257.3	5.2691		5.2691	-40.8767	-43.3639
2012-12-14 07:38:40	40.17	42.61	41257.3	5.27605		5.27605	-40.948	-43.4353
2012-12-14 07:48:40	40.22	42.65	41257.3	5.28299	41257.3	5.28299	-40.999	-43.476
2012-12-14 07:58:40	40.27	42.69	41257.3	5.28994		5.28994	-41.0499	-43.5168
2012-12-14 08:08:40	40.27	42.71	41257.3	5.29688		5.29688	-41.0499	-43.5372
2012-12-14 08:18:40	40.31	42.76	41257.3	5.30383		5.30383	-41.0907	-43.5882
2012-12-14 08:28:40	40.4	42.84	41257.4	5.31077		5.31077	-41.1825	-43.6697
2012-12-14 08:38:40	40.47	42.91	41257.4	5.31772		5.31772	-41.2538	-43.7411
2012-12-14 08:48:40	40.49	42.93	41257.4	5.32466	41257.4	5.32466	-41.2742	-43.7615
2012-12-14 08:58:40	40.54	42.96	41257.4	5.3316		5.3316	-41.3252	-43.792
2012-12-14 09:08:40	40.62	43.05	41257.4	5.33855		5.33855	-41.4067	-43.8838
2012-12-14 09:18:40	40.69	43.12	41257.4	5.34549		5.34549	-41.4781	-43.9551
2012-12-14 09:28:40	40.52	42.95	41257.4	5.35244		5.35244	-41.3048	-43.7819
2012-12-14 09:38:40	40.71	43.14	41257.4	5.35938		5.35938	-41.4985	-43.9755
2012-12-14 09:48:40	40.81	43.23	41257.4	5.36633	41257.4	5.36633	-41.6004	-44.0673
2012-12-14 09:58:40	40.91	43.32	41257.4	5.37327		5.37327	-41.7023	-44.159
2012-12-14 10:08:40	41	43.4	41257.4	5.38022		5.38022	-41.7941	-44.2406
2012-12-14 10:18:40	41.07	43.48	41257.4	5.38716		5.38716	-41.8654	-44.3221
2012-12-14 10:28:40	41.13	43.55	41257.4	5.3941		5.3941	-41.9266	-44.3935
2012-12-14 10:38:40	41.06	43.46	41257.4	5.40105		5.40105	-41.8552	-44.3017
2012-12-14 10:48:40	41.15	43.53	41257.5	5.40799	41257.5	5.40799	-41.947	-44.3731
2012-12-14 10:58:40	41.22	43.6	41257.5	5.41494		5.41494	-42.0183	-44.4444
2012-12-14 11:08:40	41.29	43.69	41257.5	5.42188		5.42188	-42.0897	-44.5362
2012-12-14 11:18:40	41.34	43.73	41257.5	5.42883		5.42883	-42.1407	-44.577
2012-12-14 11:28:40	41.42	43.81	41257.5	5.43577		5.43577	-42.2222	-44.6585
2012-12-14 11:38:40	41.49	43.88	41257.5	5.44272		5.44272	-42.2936	-44.7299
2012-12-14 11:48:40	41.56	43.96	41257.5	5.44966	41257.5	5.44966	-42.3649	-44.8114
2012-12-14 11:58:40	41.65	44.05	41257.5	5.4566		5.4566	-42.4567	-44.9032
2012-12-14 12:08:40	41.71	44.11	41257.5	5.46355		5.46355	-42.5178	-44.9643
2012-12-14 12:18:40	41.76	44.17	41257.5	5.47049		5.47049	-42.5688	-45.0255
2012-12-14 12:28:40	41.8	44.18	41257.5	5.47744		5.47744	-42.6096	-45.0357
2012-12-14 12:38:40	41.86	44.26	41257.5	5.48438		5.48438	-42.6707	-45.1172
2012-12-14 12:48:40	41.92	44.32	41257.5	5.49133	41257.5	5.49133	-42.7319	-45.1784
2012-12-14 12:58:40	42.02	44.39	41257.5	5.49827		5.49827	-42.8338	-45.2497
2012-12-14 13:08:40	42.04	44.46	41257.5	5.50522		5.50522	-42.8542	-45.3211
2012-12-14 13:18:40	42.14	44.53	41257.6	5.51216		5.51216	-42.9562	-45.3925
2012-12-14 13:28:40	42.2	44.58	41257.6	5.5191		5.5191	-43.0173	-45.4434
2012-12-14 13:38:40	42.23	44.63	41257.6	5.52605		5.52605	-43.0479	-45.4944
2012-12-14 13:48:40	42.3	44.68	41257.6	5.53299	41257.6	5.53299	-43.1193	-45.5454
2012-12-14 13:58:40	42.41	44.8	41257.6	5.53994		5.53994	-43.2314	-45.6677
2012-12-14 14:08:40	42.48	44.87	41257.6	5.54688		5.54688	-43.3028	-45.739
2012-12-14 14:18:40	42.58	44.97	41257.6	5.55383		5.55383	-43.4047	-45.841
2012-12-14 14:28:40	42.67	45.04	41257.6	5.56077		5.56077	-43.4964	-45.9123
2012-12-14 14:38:40	42.71	45.1	41257.6	5.56772		5.56772	-43.5372	-45.9735
2012-12-14 14:48:40	42.8	45.19	41257.6	5.57466	41257.6	5.57466	-43.629	-46.0652
2012-12-14 14:58:40	42.89	45.28	41257.6	5.5816		5.5816	-43.7207	-46.157
2012-12-14 15:08:40	42.96	45.35	41257.6	5.58855		5.58855	-43.792	-46.2283
2012-12-14 15:18:40	43.04	45.42	41257.6	5.59549		5.59549	-43.8736	-46.2997
2012-12-14 15:28:40	43.12	45.51	41257.6	5.60244		5.60244	-43.9551	-46.3914
2012-12-14 15:38:40	43.21	45.59	41257.7	5.60938		5.60938	-44.0469	-46.473
2012-12-14 15:48:40	43.27	45.66	41257.7	5.61633	41257.7	5.61633	-44.1081	-46.5443
2012-12-14 15:58:40	43.37	45.76	41257.7	5.62327		5.62327	-44.21	-46.6463
2012-12-14 16:08:40	43.42	45.82	41257.7	5.63022		5.63022	-44.261	-46.7074
2012-12-14 16:18:40	43.51	45.9	41257.7	5.63716		5.63716	-44.3527	-46.789
2012-12-14 16:28:40	43.62	46.01	41257.7	5.6441		5.6441	-44.4648	-46.9011
2012-12-14 16:38:40	43.71	46.08	41257.7	5.65105		5.65105	-44.5566	-46.9725
2012-12-14 16:48:40	43.79	46.19	41257.7	5.65799	41257.7	5.65799	-44.6381	-47.0846
2012-12-14 16:58:40	43.9	46.29	41257.7	5.66494		5.66494	-44.7503	-47.1865
2012-12-14 17:08:40	43.98	46.36	41257.7	5.67188		5.67188	-44.8318	-47.2579
2012-12-14 17:18:40	44.07	46.48	41257.7	5.67883		5.67883	-44.9235	-47.3802
2012-12-14 17:28:40	44.16	46.55	41257.7	5.68577		5.68577	-45.0153	-47.4516
2012-12-14 17:38:40	44.23	46.62	41257.7	5.69272		5.69272	-45.0866	-47.5229
2012-12-14 17:48:40	44.34	46.74	41257.7	5.69966	41257.7	5.69966	-45.1988	-47.6453
2012-12-14 17:58:40	44.44	46.81	41257.7	5.7066		5.7066	-45.3007	-47.7166
2012-12-14 18:08:40	44.53	46.91	41257.8	5.71355		5.71355	-45.3925	-47.8186
2012-12-14 18:18:40	44.65	47.04	41257.8	5.72049		5.72049	-45.5148	-47.9511
2012-12-14 18:28:40	44.74	47.14	41257.8	5.72744		5.72744	-45.6065	-48.053
2012-12-14 18:38:40	44.83	47.22	41257.8	5.73438		5.73438	-45.6983	-48.1346
2012-12-14 18:48:40	44.93	47.32	41257.8	5.74133	41257.8	5.74133	-45.8002	-48.2365
2012-12-14 18:58:40	45.03	47.44	41257.8	5.74827		5.74827	-45.9021	-48.3588
2012-12-14 19:08:40	45.12	47.5	41257.8	5.75522		5.75522	-45.9939	-48.42
2012-12-14 19:18:40	45.18	47.58	41257.8	5.76216		5.76216	-46.055	-48.5015
2012-12-14 19:28:40	45.18	47.6	41257.8	5.7691		5.7691	-46.055	-48.5219
2012-12-14 19:38:40	45.34	47.75	41257.8	5.77605		5.77605	-46.2181	-48.6748
2012-12-14 19:48:40	45.35	47.74	41257.8	5.78299	41257.8	5.78299	-46.2283	-48.6646
2012-12-14 19:58:40	45.43	47.82	41257.8	5.78994		5.78994	-46.3099	-48.7462
2012-12-14 20:08:40	45.48	47.86	41257.8	5.79688		5.79688	-46.3609	-48.787
2012-12-14 20:18:40	45.62	47.99	41257.8	5.80383		5.80383	-46.5036	-48.9195
2012-12-14 20:28:40	45.76	48.12	41257.9	5.81077		5.81077	-46.6463	-49.052
2012-12-14 20:38:40	45.88	48.24	41257.9	5.81772		5.81772	-46.7686	-49.1743
2012-12-14 20:48:40	46.02	48.36	41257.9	5.82466	41257.9	5.82466	-46.9113	-49.2966
2012-12-14 20:58:40	46.13	48.48	41257.9	5.8316		5.8316	-47.0234	-49.419
2012-12-14 21:08:40	46.22	48.56	41257.9	5.83855		5.83855	-47.1152	-49.5005
2012-12-14 21:18:40	46.37	48.71	41257.9	5.84549		5.84549	-47.2681	-49.6534
2012-12-14 21:28:40	46.47	48.82	41257.9	5.85244		5.85244	-47.37	-49.7655
2012-12-14 21:38:40	46.56	48.94	41257.9	5.85938		5.85938	-47.4618	-49.8879
2012-12-14 21:48:40	46.7	49.04	41257.9	5.86633	41257.9	5.86633	-47.6045	-49.9898
2012-12-14 21:58:40	46.83	49.2	41257.9	5.87327		5.87327	-47.737	-50.1529
2012-12-14 22:08:40	46.94	49.31	41257.9	5.88022		5.88022	-47.8491	-50.265
2012-12-14 22:18:40	47.08	49.42	41257.9	5.88716		5.88716	-47.9918	-50.3772
2012-12-14 22:28:40	47.18	49.52	41257.9	5.8941		5.8941	-48.0938	-50.4791
2012-12-14 22:38:40	47.29	49.66	41257.9	5.90105		5.90105	-48.2059	-50.6218
2012-12-14 22:48:40	47.42	49.8	41258	5.90799	41258	5.90799	-48.3384	-50.7645
2012-12-14 22:58:40	47.54	49.9	41258	5.91494		5.91494	-48.4608	-50.8665
2012-12-14 23:08:40	47.66	50.02	41258	5.92188		5.92188	-48.5831	-50.9888
2012-12-14 23:18:40	47.74	50.11	41258	5.92883		5.92883	-48.6646	-51.0805
2012-12-14 23:28:40	47.85	50.23	41258	5.93577		5.93577	-48.7768	-51.2029
2012-12-14 23:38:40	47.97	50.33	41258	5.94272		5.94272	-48.8991	-51.3048
2012-12-14 23:48:40	48.07	50.44	41258	5.94966	41258	5.94966	-49.001	-51.4169
2012-12-14 23:58:40	48.18	50.55	41258	5.9566		5.9566	-49.1131	-51.5291
2012-12-15 00:08:40	48.28	50.65	41258	5.96355		5.96355	-49.2151	-51.631
2012-12-15 00:18:40	48.24	50.61	41258	5.97049		5.97049	-49.1743	-51.5902
2012-12-15 00:28:40	48.39	50.73	41258	5.97744		5.97744	-49.3272	-51.7125
2012-12-15 00:38:40	48.48	50.83	41258	5.98438		5.98438	-49.419	-51.8145
2012-12-15 00:48:40	48.59	50.94	41258	5.99133	41258	5.99133	-49.5311	-51.9266
2012-12-15 00:58:40	48.67	51.03	41258	5.99827		5.99827	-49.6126	-52.0183
2012-12-15 01:08:40	48.81	51.16	41258	6.00522		6.00522	-49.7554	-52.1509
2012-12-15 01:18:40	48.9	51.27	41258.1	6.01216		6.01216	-49.8471	-52.263
2012-12-15 01:28:40	49.02	51.38	41258.1	6.0191		6.0191	-49.9694	-52.3751
2012-12-15 01:38:40	49.14	51.48	41258.1	6.02605		6.02605	-50.0917	-52.4771
2012-12-15 01:48:40	49.22	51.6	41258.1	6.03299	41258.1	6.03299	-50.1733	-52.5994
2012-12-15 01:58:40	49.33	51.7	41258.1	6.03994		6.03994	-50.2854	-52.7013
2012-12-15 02:08:40	49.45	51.8	41258.1	6.04688		6.04688	-50.4077	-52.8033
2012-12-15 02:18:40	49.55	51.93	41258.1	6.05383		6.05383	-50.5097	-52.9358
2012-12-15 02:28:40	49.64	52.01	41258.1	6.06077		6.06077	-50.6014	-53.0173
2012-12-15 02:38:40	49.76	52.13	41258.1	6.06772		6.06772	-50.7238	-53.1397
2012-12-15 02:48:40	49.88	52.23	41258.1	6.07466	41258.1	6.07466	-50.8461	-53.2416
2012-12-15 02:58:40	49.96	52.33	41258.1	6.0816		6.0816	-50.9276	-53.3435
2012-12-15 03:08:40	50.08	52.44	41258.1	6.08855		6.08855	-51.0499	-53.4557
2012-12-15 03:18:40	50.18	52.53	41258.1	6.09549		6.09549	-51.1519	-53.5474
2012-12-15 03:28:40	50.3	52.68	41258.1	6.10244		6.10244	-51.2742	-53.7003
2012-12-15 03:38:40	50.38	52.75	41258.2	6.10938		6.10938	-51.3558	-53.7717
2012-12-15 03:48:40	50.5	52.85	41258.2	6.11633	41258.2	6.11633	-51.4781	-53.8736
2012-12-15 03:58:40	50.6	52.97	41258.2	6.12327		6.12327	-51.58	-53.9959
2012-12-15 04:08:40	50.69	53.06	41258.2	6.13022		6.13022	-51.6718	-54.0877
2012-12-15 04:18:40	50.82	53.19	41258.2	6.13716		6.13716	-51.8043	-54.2202
2012-12-15 04:28:40	50.94	53.3	41258.2	6.1441		6.1441	-51.9266	-54.3323
2012-12-15 04:38:40	51.06	53.43	41258.2	6.15105		6.15105	-52.0489	-54.4648
2012-12-15 04:48:40	51.17	53.52	41258.2	6.15799	41258.2	6.15799	-52.1611	-54.5566
2012-12-15 04:58:40	51.28	53.65	41258.2	6.16494		6.16494	-52.2732	-54.6891
2012-12-15 05:08:40	51.4	53.75	41258.2	6.17188		6.17188	-52.3955	-54.791
2012-12-15 05:18:40	51.51	53.89	41258.2	6.17883		6.17883	-52.5076	-54.9337
2012-12-15 05:28:40	51.62	53.98	41258.2	6.18577		6.18577	-52.6198	-55.0255
2012-12-15 05:38:40	51.73	54.1	41258.2	6.19272		6.19272	-52.7319	-55.1478
2012-12-15 05:48:40	51.85	54.22	41258.2	6.19966	41258.2	6.19966	-52.8542	-55.2701
2012-12-15 05:58:40	51.98	54.32	41258.2	6.2066		6.2066	-52.9867	-55.3721
2012-12-15 06:08:40	52.08	54.43	41258.3	6.21355		6.21355	-53.0887	-55.4842
2012-12-15 06:18:40	52.19	54.56	41258.3	6.22049		6.22049	-53.2008	-55.6167
2012-12-15 06:28:40	52.29	54.66	41258.3	6.22744		6.22744	-53.3028	-55.7187
2012-12-15 06:38:40	52.41	54.77	41258.3	6.23438		6.23438	-53.4251	-55.8308
2012-12-15 06:48:40	52.53	54.88	41258.3	6.24133	41258.3	6.24133	-53.5474	-55.9429
2012-12-15 06:58:40	52.64	55.01	41258.3	6.24827		6.24827	-53.6595	-56.0754
2012-12-15 07:08:40	52.76	55.11	41258.3	6.25522		6.25522	-53.7819	-56.1774
2012-12-15 07:18:40	52.88	55.24	41258.3	6.26216		6.26216	-53.9042	-56.3099
2012-12-15 07:28:40	52.98	55.35	41258.3	6.2691		6.2691	-54.0061	-56.422
2012-12-15 07:38:40	53.09	55.46	41258.3	6.27605		6.27605	-54.1182	-56.5341
2012-12-15 07:48:40	53.17	55.54	41258.3	6.28299	41258.3	6.28299	-54.1998	-56.6157
2012-12-15 07:58:40	53.29	55.66	41258.3	6.28994		6.28994	-54.3221	-56.738
2012-12-15 08:08:40	53.4	55.76	41258.3	6.29688		6.29688	-54.4343	-56.84
2012-12-15 08:18:40	53.49	55.86	41258.3	6.30383		6.30383	-54.526	-56.9419
2012-12-15 08:28:40	53.62	55.97	41258.4	6.31077		6.31077	-54.6585	-57.054
2012-12-15 08:38:40	53.72	56.08	41258.4	6.31772		6.31772	-54.7604	-57.1662
2012-12-15 08:48:40	53.82	56.18	41258.4	6.32466	41258.4	6.32466	-54.8624	-57.2681
2012-12-15 08:58:40	53.93	56.28	41258.4	6.3316		6.3316	-54.9745	-57.37
2012-12-15 09:08:40	54.07	56.42	41258.4	6.33855		6.33855	-55.1172	-57.5127
2012-12-15 09:18:40	54.18	56.53	41258.4	6.34549		6.34549	-55.2294	-57.6249
2012-12-15 09:28:40	54.3	56.66	41258.4	6.35244		6.35244	-55.3517	-57.7574
2012-12-15 09:38:40	54.41	56.77	41258.4	6.35938		6.35938	-55.4638	-57.8695
2012-12-15 09:48:40	54.54	56.9	41258.4	6.36633	41258.4	6.36633	-55.5963	-58.002
2012-12-15 09:58:40	54.66	57.02	41258.4	6.37327		6.37327	-55.7187	-58.1244
2012-12-15 10:08:40	54.75	57.11	41258.4	6.38022		6.38022	-55.8104	-58.2161
2012-12-15 10:18:40	54.85	57.19	41258.4	6.38716		6.38716	-55.9123	-58.2977
2012-12-15 10:28:40	54.93	57.29	41258.4	6.3941		6.3941	-55.9939	-58.3996
2012-12-15 10:38:40	55.06	57.41	41258.4	6.40105		6.40105	-56.1264	-58.5219
2012-12-15 10:48:40	55.17	57.54	41258.5	6.40799	41258.5	6.40799	-56.2385	-58.6544
2012-12-15 10:58:40	55.26	57.64	41258.5	6.41494		6.41494	-56.3303	-58.7564
2012-12-15 11:08:40	55.39	57.76	41258.5	6.42188		6.42188	-56.4628	-58.8787
2012-12-15 11:18:40	55.52	57.88	41258.5	6.42883		6.42883	-56.5953	-59.001
2012-12-15 11:28:40	55.6	57.96	41258.5	6.43577		6.43577	-56.6769	-59.0826
2012-12-15 11:38:40	55.7	58.04	41258.5	6.44272		6.44272	-56.7788	-59.1641
2012-12-15 11:48:40	55.81	58.2	41258.5	6.44966	41258.5	6.44966	-56.8909	-59.3272
2012-12-15 11:58:40	55.96	58.35	41258.5	6.4566		6.4566	-57.0438	-59.4801
2012-12-15 12:08:40	56.08	58.46	41258.5	6.46355		6.46355	-57.1662	-59.5923
2012-12-15 12:18:40	56.09	58.45	41258.5	6.47049		6.47049	-57.1764	-59.5821
2012-12-15 12:28:40	56.18	58.54	41258.5	6.47744		6.47744	-57.2681	-59.6738
2012-12-15 12:38:40	56.33	58.67	41258.5	6.48438		6.48438	-57.421	-59.8063
2012-12-15 12:48:40	56.41	58.75	41258.5	6.49133	41258.5	6.49133	-57.5025	-59.8879
2012-12-15 12:58:40	56.53	58.88	41258.5	6.49827		6.49827	-57.6249	-60.0204
2012-12-15 13:08:40	56.67	59.03	41258.5	6.50522		6.50522	-57.7676	-60.1733
2012-12-15 13:18:40	56.81	59.15	41258.6	6.51216		6.51216	-57.9103	-60.2956
2012-12-15 13:28:40	56.93	59.27	41258.6	6.5191		6.5191	-58.0326	-60.4179
2012-12-15 13:38:40	57.04	59.39	41258.6	6.52605		6.52605	-58.1448	-60.5403
2012-12-15 13:48:40	57.17	59.53	41258.6	6.53299	41258.6	6.53299	-58.2773	-60.683
2012-12-15 13:58:40	57.29	59.64	41258.6	6.53994		6.53994	-58.3996	-60.7951
2012-12-15 14:08:40	57.41	59.76	41258.6	6.54688		6.54688	-58.5219	-60.9174
2012-12-15 14:18:40	57.52	59.87	41258.6	6.55383		6.55383	-58.634	-61.0296
2012-12-15 14:28:40	57.64	59.98	41258.6	6.56077		6.56077	-58.7564	-61.1417
2012-12-15 14:38:40	57.8	60.13	41258.6	6.56772		6.56772	-58.9195	-61.2946
2012-12-15 14:48:40	57.91	60.26	41258.6	6.57466	41258.6	6.57466	-59.0316	-61.4271
2012-12-15 14:58:40	58.03	60.38	41258.6	6.5816		6.5816	-59.1539	-61.5494
2012-12-15 15:08:40	58.15	60.5	41258.6	6.58855		6.58855	-59.2762	-61.6718
2012-12-15 15:18:40	58.31	60.65	41258.6	6.59549		6.59549	-59.4393	-61.8247
2012-12-15 15:28:40	58.42	60.76	41258.6	6.60244		6.60244	-59.5515	-61.9368
2012-12-15 15:38:40	58.53	60.9	41258.7	6.60938		6.60938	-59.6636	-62.0795
2012-12-15 15:48:40	58.69	61.03	41258.7	6.61633	41258.7	6.61633	-59.8267	-62.212
2012-12-15 15:58:40	58.84	61.18	41258.7	6.62327		6.62327	-59.9796	-62.3649
2012-12-15 16:08:40	58.94	61.3	41258.7	6.63022		6.63022	-60.0815	-62.4873
2012-12-15 16:18:40	59.07	61.43	41258.7	6.63716		6.63716	-60.2141	-62.6198
2012-12-15 16:28:40	59.23	61.58	41258.7	6.6441		6.6441	-60.3772	-62.7727
2012-12-15 16:38:40	59.35	61.7	41258.7	6.65105		6.65105	-60.4995	-62.895
2012-12-15 16:48:40	59.49	61.84	41258.7	6.65799	41258.7	6.65799	-60.6422	-63.0377
2012-12-15 16:58:40	59.63	61.98	41258.7	6.66494		6.66494	-60.7849	-63.1804
2012-12-15 17:08:40	59.75	62.11	41258.7	6.67188		6.67188	-60.9072	-63.3129
2012-12-15 17:18:40	59.89	62.25	41258.7	6.67883		6.67883	-61.0499	-63.4557
2012-12-15 17:28:40	60.05	62.4	41258.7	6.68577		6.68577	-61.213	-63.6086
2012-12-15 17:38:40	60.18	62.55	41258.7	6.69272		6.69272	-61.3456	-63.7615
2012-12-15 17:48:40	60.32	62.67	41258.7	6.69966	41258.7	6.69966	-61.4883	-63.8838
2012-12-15 17:58:40	60.44	62.8	41258.7	6.7066		6.7066	-61.6106	-64.0163
2012-12-15 18:08:40	60.59	62.95	41258.8	6.71355		6.71355	-61.7635	-64.1692
2012-12-15 18:18:40	60.71	63.09	41258.8	6.72049		6.72049	-61.8858	-64.3119
2012-12-15 18:28:40	60.9	63.26	41258.8	6.72744		6.72744	-62.0795	-64.4852
2012-12-15 18:38:40	61.08	63.43	41258.8	6.73438		6.73438	-62.263	-64.6585
2012-12-15 18:48:40	61.22	63.59	41258.8	6.74133	41258.8	6.74133	-62.4057	-64.8216
2012-12-15 18:58:40	61.38	63.74	41258.8	6.74827		6.74827	-62.5688	-64.9745
2012-12-15 19:08:40	61.54	63.89	41258.8	6.75522		6.75522	-62.7319	-65.1274
2012-12-15 19:18:40	61.72	64.08	41258.8	6.76216		6.76216	-62.9154	-65.3211
2012-12-15 19:28:40	61.89	64.25	41258.8	6.7691		6.7691	-63.0887	-65.4944
2012-12-15 19:38:40	62.05	64.4	41258.8	6.77605		6.77605	-63.2518	-65.6473
2012-12-15 19:48:40	62.21	64.58	41258.8	6.78299	41258.8	6.78299	-63.4149	-65.8308
2012-12-15 19:58:40	62.36	64.74	41258.8	6.78994		6.78994	-63.5678	-65.9939
2012-12-15 20:08:40	62.54	64.89	41258.8	6.79688		6.79688	-63.7513	-66.1468
2012-12-15 20:18:40	62.69	65.03	41258.8	6.80383		6.80383	-63.9042	-66.2895
2012-12-15 20:28:40	62.85	65.22	41258.9	6.81077		6.81077	-64.0673	-66.4832
2012-12-15 20:38:40	63.04	65.39	41258.9	6.81772		6.81772	-64.261	-66.6565
2012-12-15 20:48:40	63.19	65.55	41258.9	6.82466	41258.9	6.82466	-64.4139	-66.8196
2012-12-15 20:58:40	63.38	65.67	41258.9	6.8316		6.8316	-64.6075	-66.9419
2012-12-15 21:08:40	63.53	65.87	41258.9	6.83855		6.83855	-64.7604	-67.1458
2012-12-15 21:18:40	63.69	66.03	41258.9	6.84549		6.84549	-64.9235	-67.3089
2012-12-15 21:28:40	63.84	66.16	41258.9	6.85244		6.85244	-65.0765	-67.4414
2012-12-15 21:38:40	64	66.33	41258.9	6.85938		6.85938	-65.2396	-67.6147
2012-12-15 21:48:40	64.18	66.52	41258.9	6.86633	41258.9	6.86633	-65.423	-67.8084
2012-12-15 21:58:40	64.35	66.69	41258.9	6.87327		6.87327	-65.5963	-67.9817
2012-12-15 22:08:40	64.54	66.9	41258.9	6.88022		6.88022	-65.79	-68.1957
2012-12-15 22:18:40	64.71	67.07	41258.9	6.88716		6.88716	-65.9633	-68.369
2012-12-15 22:28:40	64.87	67.21	41258.9	6.8941		6.8941	-66.1264	-68.5117
2012-12-15 22:38:40	65.06	67.41	41258.9	6.90105		6.90105	-66.3201	-68.7156
2012-12-15 22:48:40	65.21	67.53	41259	6.90799	41259	6.90799	-66.473	-68.8379
2012-12-15 22:58:40	65.37	67.72	41259	6.91494		6.91494	-66.6361	-69.0316
2012-12-15 23:08:40	65.51	67.83	41259	6.92188		6.92188	-66.7788	-69.1437
2012-12-15 23:18:40	65.67	68.02	41259	6.92883		6.92883	-66.9419	-69.3374
2012-12-15 23:28:40	65.85	68.2	41259	6.93577		6.93577	-67.1254	-69.5209
2012-12-15 23:38:40	66.04	68.37	41259	6.94272		6.94272	-67.3191	-69.6942
2012-12-15 23:48:40	66.19	68.55	41259	6.94966	41259	6.94966	-67.472	-69.8777
2012-12-15 23:58:40	66.35	68.68	41259	6.9566		6.9566	-67.6351	-70.0102
2012-12-16 00:08:40	66.47	68.83	41259	6.96355		6.96355	-67.7574	-70.1631
2012-12-16 00:18:40	66.66	69.03	41259	6.97049		6.97049	-67.9511	-70.367
2012-12-16 00:28:40	66.83	69.18	41259	6.97744		6.97744	-68.1244	-70.5199
2012-12-16 00:38:40	67	69.37	41259	6.98438		6.98438	-68.2977	-70.7136
2012-12-16 00:48:40	67.18	69.54	41259	6.99133	41259	6.99133	-68.4811	-70.8869
2012-12-16 00:58:40	67.37	69.72	41259	6.99827		6.99827	-68.6748	-71.0703
2012-12-16 01:08:40	67.53	69.9	41259	7.00522		7.00522	-68.8379	-71.2538
2012-12-16 01:18:40	67.73	70.08	41259.1	7.01216		7.01216	-69.0418	-71.4373
2012-12-16 01:28:40	67.89	70.23	41259.1	7.0191		7.0191	-69.2049	-71.5902
2012-12-16 01:38:40	68.04	70.4	41259.1	7.02605		7.02605	-69.3578	-71.7635
2012-12-16 01:48:40	68.21	70.57	41259.1	7.03299	41259.1	7.03299	-69.5311	-71.9368
2012-12-16 01:58:40	68.39	70.76	41259.1	7.03994		7.03994	-69.7146	-72.1305
2012-12-16 02:08:40	68.57	70.92	41259.1	7.04688		7.04688	-69.8981	-72.2936
2012-12-16 02:18:40	68.77	71.13	41259.1	7.05383		7.05383	-70.1019	-72.5076
2012-12-16 02:28:40	68.91	71.27	41259.1	7.06077		7.06077	-70.2446	-72.6504
2012-12-16 02:38:40	69.11	71.45	41259.1	7.06772		7.06772	-70.4485	-72.8338
2012-12-16 02:48:40	69.27	71.64	41259.1	7.07466	41259.1	7.07466	-70.6116	-73.0275
2012-12-16 02:58:40	69.48	71.83	41259.1	7.0816		7.0816	-70.8257	-73.2212
2012-12-16 03:08:40	69.66	72.02	41259.1	7.08855		7.08855	-71.0092	-73.4149
2012-12-16 03:18:40	69.84	72.19	41259.1	7.09549		7.09549	-71.1927	-73.5882
2012-12-16 03:28:40	70.02	72.38	41259.1	7.10244		7.10244	-71.3761	-73.7819
2012-12-16 03:38:40	70.21	72.53	41259.2	7.10938		7.10938	-71.5698	-73.9348
2012-12-16 03:48:40	70.39	72.75	41259.2	7.11633	41259.2	7.11633	-71.7533	-74.159
2012-12-16 03:58:40	70.6	72.96	41259.2	7.12327		7.12327	-71.9674	-74.3731
2012-12-16 04:08:40	70.77	73.13	41259.2	7.13022		7.13022	-72.1407	-74.5464
2012-12-16 04:18:40	70.94	73.3	41259.2	7.13716		7.13716	-72.314	-74.7197
2012-12-16 04:28:40	71.12	73.48	41259.2	7.1441		7.1441	-72.4975	-74.9032
2012-12-16 04:38:40	71.29	73.65	41259.2	7.15105		7.15105	-72.6707	-75.0765
2012-12-16 04:48:40	71.46	73.83	41259.2	7.15799	41259.2	7.15799	-72.844	-75.2599
2012-12-16 04:58:40	71.64	74.01	41259.2	7.16494		7.16494	-73.0275	-75.4434
2012-12-16 05:08:40	71.81	74.18	41259.2	7.17188		7.17188	-73.2008	-75.6167
2012-12-16 05:18:40	71.99	74.35	41259.2	7.17883		7.17883	-73.3843	-75.79
2012-12-16 05:28:40	72.16	74.52	41259.2	7.18577		7.18577	-73.5576	-75.9633
2012-12-16 05:38:40	72.33	74.7	41259.2	7.19272		7.19272	-73.7309	-76.1468
2012-12-16 05:48:40	72.54	74.88	41259.2	7.19966	41259.2	7.19966	-73.945	-76.3303
2012-12-16 05:58:40	72.7	75.07	41259.2	7.2066		7.2066	-74.1081	-76.524
2012-12-16 06:08:40	72.88	75.27	41259.3	7.21355		7.21355	-74.2915	-76.7278
2012-12-16 06:18:40	73.08	75.45	41259.3	7.22049		7.22049	-74.4954	-76.9113
2012-12-16 06:28:40	73.24	75.61	41259.3	7.22744		7.22744	-74.6585	-77.0744
2012-12-16 06:38:40	73.43	75.8	41259.3	7.23438		7.23438	-74.8522	-77.2681
2012-12-16 06:48:40	73.59	75.96	41259.3	7.24133	41259.3	7.24133	-75.0153	-77.4312
2012-12-16 06:58:40	73.77	76.18	41259.3	7.24827		7.24827	-75.1988	-77.6555
2012-12-16 07:08:40	73.96	76.34	41259.3	7.25522		7.25522	-75.3925	-77.8186
2012-12-16 07:18:40	74.15	76.52	41259.3	7.26216		7.26216	-75.5861	-78.002
2012-12-16 07:28:40	74.35	76.72	41259.3	7.2691		7.2691	-75.79	-78.2059
2012-12-16 07:38:40	74.5	76.88	41259.3	7.27605		7.27605	-75.9429	-78.369
2012-12-16 07:48:40	74.67	77.05	41259.3	7.28299	41259.3	7.28299	-76.1162	-78.5423
2012-12-16 07:58:40	74.87	77.25	41259.3	7.28994		7.28994	-76.3201	-78.7462
2012-12-16 08:08:40	75.02	77.4	41259.3	7.29688		7.29688	-76.473	-78.8991
2012-12-16 08:18:40	75.19	77.57	41259.3	7.30383		7.30383	-76.6463	-79.0724
2012-12-16 08:28:40	75.36	77.75	41259.4	7.31077		7.31077	-76.8196	-79.2559
2012-12-16 08:38:40	75.52	77.91	41259.4	7.31772		7.31772	-76.9827	-79.419
2012-12-16 08:48:40	75.69	78.06	41259.4	7.32466	41259.4	7.32466	-77.156	-79.5719
2012-12-16 08:58:40	75.86	78.25	41259.4	7.3316		7.3316	-77.3293	-79.7655
2012-12-16 09:08:40	76.06	78.44	41259.4	7.33855		7.33855	-77.5331	-79.9592
2012-12-16 09:18:40	76.25	78.64	41259.4	7.34549		7.34549	-77.7268	-80.1631
2012-12-16 09:28:40	76.44	78.81	41259.4	7.35244		7.35244	-77.9205	-80.3364
2012-12-16 09:38:40	76.6	78.98	41259.4	7.35938		7.35938	-78.0836	-80.5097
2012-12-16 09:48:40	76.77	79.16	41259.4	7.36633	41259.4	7.36633	-78.2569	-80.6932
2012-12-16 09:58:40	76.97	79.37	41259.4	7.37327		7.37327	-78.4608	-80.9072
2012-12-16 10:08:40	77.17	79.55	41259.4	7.38022		7.38022	-78.6646	-81.0907
2012-12-16 10:18:40	77.33	79.73	41259.4	7.38716		7.38716	-78.8277	-81.2742
2012-12-16 10:28:40	77.51	79.92	41259.4	7.3941		7.3941	-79.0112	-81.4679
2012-12-16 10:38:40	77.69	80.04	41259.4	7.40105		7.40105	-79.1947	-81.5902
2012-12-16 10:48:40	77.87	80.24	41259.5	7.40799	41259.5	7.40799	-79.3782	-81.7941
2012-12-16 10:58:40	78.07	80.46	41259.5	7.41494		7.41494	-79.5821	-82.0183
2012-12-16 11:08:40	78.24	80.63	41259.5	7.42188		7.42188	-79.7554	-82.1916
2012-12-16 11:18:40	78.43	80.81	41259.5	7.42883		7.42883	-79.949	-82.3751
2012-12-16 11:28:40	78.6	80.95	41259.5	7.43577		7.43577	-80.1223	-82.5178
2012-12-16 11:38:40	78.77	81.13	41259.5	7.44272		7.44272	-80.2956	-82.7013
2012-12-16 11:48:40	78.95	81.32	41259.5	7.44966	41259.5	7.44966	-80.4791	-82.895
2012-12-16 11:58:40	79.11	81.49	41259.5	7.4566		7.4566	-80.6422	-83.0683
2012-12-16 12:08:40	79.33	81.72	41259.5	7.46355		7.46355	-80.8665	-83.3028
2012-12-16 12:18:40	79.53	81.91	41259.5	7.47049		7.47049	-81.0703	-83.4964
2012-12-16 12:28:40	79.7	82.09	41259.5	7.47744		7.47744	-81.2436	-83.6799
2012-12-16 12:38:40	79.87	82.26	41259.5	7.48438		7.48438	-81.4169	-83.8532
2012-12-16 12:48:40	80	82.43	41259.5	7.49133	41259.5	7.49133	-81.5494	-84.0265
2012-12-16 12:58:40	80.24	82.62	41259.5	7.49827		7.49827	-81.7941	-84.2202
2012-12-16 13:08:40	80.42	82.82	41259.5	7.50522		7.50522	-81.9776	-84.4241
2012-12-16 13:18:40	80.61	83	41259.6	7.51216		7.51216	-82.1713	-84.6075
2012-12-16 13:28:40	80.79	83.2	41259.6	7.5191		7.5191	-82.3547	-84.8114
2012-12-16 13:38:40	81	83.39	41259.6	7.52605		7.52605	-82.5688	-85.0051
2012-12-16 13:48:40	81.19	83.55	41259.6	7.53299	41259.6	7.53299	-82.7625	-85.1682
2012-12-16 13:58:40	81.38	83.77	41259.6	7.53994		7.53994	-82.9562	-85.3925
2012-12-16 14:08:40	81.57	83.96	41259.6	7.54688		7.54688	-83.1498	-85.5861
2012-12-16 14:18:40	81.79	84.18	41259.6	7.55383		7.55383	-83.3741	-85.8104
2012-12-16 14:28:40	81.99	84.39	41259.6	7.56077		7.56077	-83.578	-86.0245
2012-12-16 14:38:40	82.2	84.6	41259.6	7.56772		7.56772	-83.792	-86.2385
2012-12-16 14:48:40	82.39	84.83	41259.6	7.57466	41259.6	7.57466	-83.9857	-86.473
2012-12-16 14:58:40	82.64	85.06	41259.6	7.5816		7.5816	-84.2406	-86.7074
2012-12-16 15:08:40	82.86	85.28	41259.6	7.58855		7.58855	-84.4648	-86.9317
2012-12-16 15:18:40	83.06	85.46	41259.6	7.59549		7.59549	-84.6687	-87.1152
2012-12-16 15:28:40	83.25	85.65	41259.6	7.60244		7.60244	-84.8624	-87.3089
2012-12-16 15:38:40	83.48	85.89	41259.7	7.60938		7.60938	-85.0968	-87.5535
2012-12-16 15:48:40	83.66	86.08	41259.7	7.61633	41259.7	7.61633	-85.2803	-87.7472
2012-12-16 15:58:40	83.85	86.28	41259.7	7.62327		7.62327	-85.474	-87.9511
2012-12-16 16:08:40	84.03	86.46	41259.7	7.63022		7.63022	-85.6575	-88.1346
2012-12-16 16:18:40	84.23	86.64	41259.7	7.63716		7.63716	-85.8614	-88.318
2012-12-16 16:28:40	84.43	86.87	41259.7	7.6441		7.6441	-86.0652	-88.5525
2012-12-16 16:38:40	84.61	87.05	41259.7	7.65105		7.65105	-86.2487	-88.736
2012-12-16 16:48:40	84.83	87.26	41259.7	7.65799	41259.7	7.65799	-86.473	-88.9501
2012-12-16 16:58:40	85.05	87.47	41259.7	7.66494		7.66494	-86.6972	-89.1641
2012-12-16 17:08:40	85.27	87.69	41259.7	7.67188		7.67188	-86.9215	-89.3884
2012-12-16 17:18:40	85.48	87.91	41259.7	7.67883		7.67883	-87.1356	-89.6126
2012-12-16 17:28:40	85.69	88.12	41259.7	7.68577		7.68577	-87.3496	-89.8267
2012-12-16 17:38:40	85.93	88.36	41259.7	7.69272		7.69272	-87.5943	-90.0714
2012-12-16 17:48:40	86.13	88.56	41259.7	7.69966	41259.7	7.69966	-87.7982	-90.2752
2012-12-16 17:58:40	86.35	88.8	41259.7	7.7066		7.7066	-88.0224	-90.5199
2012-12-16 18:08:40	86.61	89.02	41259.8	7.71355		7.71355	-88.2875	-90.7441
2012-12-16 18:18:40	86.8	89.24	41259.8	7.72049		7.72049	-88.4811	-90.9684
2012-12-16 18:28:40	87.07	89.5	41259.8	7.72744		7.72744	-88.7564	-91.2334
2012-12-16 18:38:40	87.26	89.7	41259.8	7.73438		7.73438	-88.9501	-91.4373
2012-12-16 18:48:40	87.5	89.92	41259.8	7.74133	41259.8	7.74133	-89.1947	-91.6616
2012-12-16 18:58:40	87.73	90.17	41259.8	7.74827		7.74827	-89.4292	-91.9164
2012-12-16 19:08:40	87.95	90.4	41259.8	7.75522		7.75522	-89.6534	-92.1509
2012-12-16 19:18:40	88.18	90.63	41259.8	7.76216		7.76216	-89.8879	-92.3853
2012-12-16 19:28:40	88.4	90.82	41259.8	7.7691		7.7691	-90.1121	-92.579
2012-12-16 19:38:40	88.62	91.05	41259.8	7.77605		7.77605	-90.3364	-92.8135
2012-12-16 19:48:40	88.87	91.31	41259.8	7.78299	41259.8	7.78299	-90.5912	-93.0785
2012-12-16 19:58:40	88.94	91.35	41259.8	7.78994		7.78994	-90.6626	-93.1193
2012-12-16 20:08:40	89.18	91.6	41259.8	7.79688		7.79688	-90.9072	-93.3741
2012-12-16 20:18:40	89.41	91.84	41259.8	7.80383		7.80383	-91.1417	-93.6188
2012-12-16 20:28:40	89.65	92.08	41259.9	7.81077		7.81077	-91.3863	-93.8634
2012-12-16 20:38:40	89.89	92.32	41259.9	7.81772		7.81772	-91.631	-94.1081
2012-12-16 20:48:40	90.1	92.54	41259.9	7.82466	41259.9	7.82466	-91.8451	-94.3323
2012-12-16 20:58:40	90.34	92.78	41259.9	7.8316		7.8316	-92.0897	-94.577
2012-12-16 21:08:40	90.58	93	41259.9	7.83855		7.83855	-92.3344	-94.8012
2012-12-16 21:18:40	90.78	93.23	41259.9	7.84549		7.84549	-92.5382	-95.0357
2012-12-16 21:28:40	91.05	93.49	41259.9	7.85244		7.85244	-92.8135	-95.3007
2012-12-16 21:38:40	91.29	93.72	41259.9	7.85938		7.85938	-93.0581	-95.5352
2012-12-16 21:48:40	91.51	93.97	41259.9	7.86633	41259.9	7.86633	-93.2824	-95.79
2012-12-16 21:58:40	91.77	94.21	41259.9	7.87327		7.87327	-93.5474	-96.0347
2012-12-16 22:08:40	92.01	94.46	41259.9	7.88022		7.88022	-93.792	-96.2895
2012-12-16 22:18:40	92.27	94.7	41259.9	7.88716		7.88716	-94.0571	-96.5341
2012-12-16 22:28:40	92.5	94.94	41259.9	7.8941		7.8941	-94.2915	-96.7788
2012-12-16 22:38:40	92.78	95.22	41259.9	7.90105		7.90105	-94.577	-97.0642
2012-12-16 22:48:40	93.01	95.47	41260	7.90799	41260	7.90799	-94.8114	-97.3191
2012-12-16 22:58:40	93.24	95.7	41260	7.91494		7.91494	-95.0459	-97.5535
2012-12-16 23:08:40	93.49	95.96	41260	7.92188		7.92188	-95.3007	-97.8186
2012-12-16 23:18:40	93.72	96.16	41260	7.92883		7.92883	-95.5352	-98.0224
2012-12-16 23:28:40	93.88	96.34	41260	7.93577		7.93577	-95.6983	-98.2059
2012-12-16 23:38:40	94.18	96.61	41260	7.94272		7.94272	-96.0041	-98.4811
2012-12-16 23:48:40	94.4	96.85	41260	7.94966	41260	7.94966	-96.2283	-98.7258
2012-12-16 23:58:40	94.68	97.11	41260	7.9566		7.9566	-96.5138	-98.9908
2012-12-17 00:08:40	94.91	97.36	41260	7.96355		7.96355	-96.7482	-99.2457
2012-12-17 00:18:40	95.19	97.64	41260	7.97049		7.97049	-97.0336	-99.5311
2012-12-17 00:28:40	95.44	97.9	41260	7.97744		7.97744	-97.2885	-99.7961
2012-12-17 00:38:40	95.66	98.11	41260	7.98438		7.98438	-97.5127	-100.01
2012-12-17 00:48:40	95.93	98.4	41260	7.99133	41260	7.99133	-97.788	-100.306
2012-12-17 00:58:40	96.17	98.63	41260	7.99827		7.99827	-98.0326	-100.54
2012-12-17 01:08:40	96.43	98.9	41260	8.00522		8.00522	-98.2977	-100.815
2012-12-17 01:18:40	96.66	99.14	41260.1	8.01216		8.01216	-98.5321	-101.06
2012-12-17 01:28:40	96.91	99.37	41260.1	8.0191		8.0191	-98.787	-101.295
2012-12-17 01:38:40	97.16	99.59	41260.1	8.02605		8.02605	-99.0418	-101.519
2012-12-17 01:48:40	97.4	99.86	41260.1	8.03299	41260.1	8.03299	-99.2864	-101.794
2012-12-17 01:58:40	97.64	100.1	41260.1	8.03994		8.03994	-99.5311	-102.039
2012-12-17 02:08:40	97.91	100.34	41260.1	8.04688		8.04688	-99.8063	-102.283
2012-12-17 02:18:40	98.16	100.64	41260.1	8.05383		8.05383	-100.061	-102.589
2012-12-17 02:28:40	98.4	100.89	41260.1	8.06077		8.06077	-100.306	-102.844
2012-12-17 02:38:40	98.7	101.2	41260.1	8.06772		8.06772	-100.612	-103.16
2012-12-17 02:48:40	98.94	101.41	41260.1	8.07466	41260.1	8.07466	-100.856	-103.374
2012-12-17 02:58:40	99.2	101.7	41260.1	8.0816		8.0816	-101.121	-103.67
2012-12-17 03:08:40	99.49	101.95	41260.1	8.08855		8.08855	-101.417	-103.925
2012-12-17 03:18:40	99.74	102.25	41260.1	8.09549		8.09549	-101.672	-104.23
2012-12-17 03:28:40	100.05	102.55	41260.1	8.10244		8.10244	-101.988	-104.536
2012-12-17 03:38:40	100.32	102.8	41260.2	8.10938		8.10938	-102.263	-104.791
2012-12-17 03:48:40	100.61	103.1	41260.2	8.11633	41260.2	8.11633	-102.559	-105.097
2012-12-17 03:58:40	100.88	103.36	41260.2	8.12327		8.12327	-102.834	-105.362
2012-12-17 04:08:40	101.14	103.62	41260.2	8.13022		8.13022	-103.099	-105.627
2012-12-17 04:18:40	101.42	103.89	41260.2	8.13716		8.13716	-103.384	-105.902
2012-12-17 04:28:40	101.66	104.1	41260.2	8.1441		8.1441	-103.629	-106.116
2012-12-17 04:38:40	101.9	104.39	41260.2	8.15105		8.15105	-103.874	-106.412
2012-12-17 04:48:40	102.12	104.58	41260.2	8.15799	41260.2	8.15799	-104.098	-106.606
2012-12-17 04:58:40	102.36	104.87	41260.2	8.16494		8.16494	-104.343	-106.901
2012-12-17 05:08:40	102.64	105.16	41260.2	8.17188		8.17188	-104.628	-107.197
2012-12-17 05:18:40	102.93	105.44	41260.2	8.17883		8.17883	-104.924	-107.482
2012-12-17 05:28:40	103.2	105.7	41260.2	8.18577		8.18577	-105.199	-107.747
2012-12-17 05:38:40	103.47	105.99	41260.2	8.19272		8.19272	-105.474	-108.043
2012-12-17 05:48:40	103.76	106.27	41260.2	8.19966	41260.2	8.19966	-105.77	-108.328
2012-12-17 05:58:40	104.05	106.56	41260.2	8.2066		8.2066	-106.065	-108.624
2012-12-17 06:08:40	104.32	106.84	41260.3	8.21355		8.21355	-106.34	-108.909
2012-12-17 06:18:40	104.6	107.12	41260.3	8.22049		8.22049	-106.626	-109.195
2012-12-17 06:28:40	104.92	107.46	41260.3	8.22744		8.22744	-106.952	-109.541
2012-12-17 06:38:40	105.14	107.73	41260.3	8.23438		8.23438	-107.176	-109.817
2012-12-17 06:48:40	105.49	108.04	41260.3	8.24133	41260.3	8.24133	-107.533	-110.133
2012-12-17 06:58:40	105.8	108.38	41260.3	8.24827		8.24827	-107.849	-110.479
2012-12-17 07:08:40	106.13	108.67	41260.3	8.25522		8.25522	-108.186	-110.775
2012-12-17 07:18:40	106.4	108.96	41260.3	8.26216		8.26216	-108.461	-111.07
2012-12-17 07:28:40	106.71	109.24	41260.3	8.2691		8.2691	-108.777	-111.356
2012-12-17 07:38:40	107.02	109.59	41260.3	8.27605		8.27605	-109.093	-111.713
2012-12-17 07:48:40	107.36	109.89	41260.3	8.28299	41260.3	8.28299	-109.439	-112.018
2012-12-17 07:58:40	107.63	110.19	41260.3	8.28994		8.28994	-109.715	-112.324
2012-12-17 08:08:40	107.94	110.52	41260.3	8.29688		8.29688	-110.031	-112.661
2012-12-17 08:18:40	108.26	110.82	41260.3	8.30383		8.30383	-110.357	-112.966
2012-12-17 08:28:40	108.59	111.15	41260.4	8.31077		8.31077	-110.693	-113.303
2012-12-17 08:38:40	108.89	111.48	41260.4	8.31772		8.31772	-110.999	-113.639
2012-12-17 08:48:40	109.2	111.77	41260.4	8.32466	41260.4	8.32466	-111.315	-113.935
2012-12-17 08:58:40	109.5	112.07	41260.4	8.3316		8.3316	-111.621	-114.241
2012-12-17 09:08:40	109.78	112.38	41260.4	8.33855		8.33855	-111.906	-114.557
2012-12-17 09:18:40	110.1	112.68	41260.4	8.34549		8.34549	-112.232	-114.862
2012-12-17 09:28:40	110.43	113.03	41260.4	8.35244		8.35244	-112.569	-115.219
2012-12-17 09:38:40	110.76	113.37	41260.4	8.35938		8.35938	-112.905	-115.566
2012-12-17 09:48:40	111.07	113.68	41260.4	8.36633	41260.4	8.36633	-113.221	-115.882
2012-12-17 09:58:40	111.34	113.99	41260.4	8.37327		8.37327	-113.496	-116.198
2012-12-17 10:08:40	111.68	114.32	41260.4	8.38022		8.38022	-113.843	-116.534
2012-12-17 10:18:40	112	114.61	41260.4	8.38716		8.38716	-114.169	-116.83
2012-12-17 10:28:40	112.28	114.9	41260.4	8.3941		8.3941	-114.455	-117.125
2012-12-17 10:38:40	112.59	115.22	41260.4	8.40105		8.40105	-114.771	-117.452
2012-12-17 10:48:40	112.89	115.53	41260.5	8.40799	41260.5	8.40799	-115.076	-117.768
2012-12-17 10:58:40	112.9	115.54	41260.5	8.41494		8.41494	-115.087	-117.778
2012-12-17 11:08:40	113.35	116.07	41260.5	8.42188		8.42188	-115.545	-118.318
2012-12-17 11:18:40	113.75	116.46	41260.5	8.42883		8.42883	-115.953	-118.716
2012-12-17 11:28:40	114.06	116.73	41260.5	8.43577		8.43577	-116.269	-118.991
2012-12-17 11:38:40	114.37	117.02	41260.5	8.44272		8.44272	-116.585	-119.286
2012-12-17 11:48:40	114.65	117.31	41260.5	8.44966	41260.5	8.44966	-116.871	-119.582
2012-12-17 11:58:40	114.99	117.62	41260.5	8.4566		8.4566	-117.217	-119.898
2012-12-17 12:08:40	115.26	117.91	41260.5	8.46355		8.46355	-117.492	-120.194
2012-12-17 12:18:40	115.59	118.25	41260.5	8.47049		8.47049	-117.829	-120.54
2012-12-17 12:28:40	115.9	118.51	41260.5	8.47744		8.47744	-118.145	-120.805
2012-12-17 12:38:40	116.23	118.88	41260.5	8.48438		8.48438	-118.481	-121.182
2012-12-17 12:48:40	116.57	119.21	41260.5	8.49133	41260.5	8.49133	-118.828	-121.519
2012-12-17 12:58:40	116.87	119.51	41260.5	8.49827		8.49827	-119.134	-121.825
2012-12-17 13:08:40	117.21	119.84	41260.5	8.50522		8.50522	-119.48	-122.161
2012-12-17 13:18:40	117.5	120.18	41260.6	8.51216		8.51216	-119.776	-122.508
2012-12-17 13:28:40	117.84	120.53	41260.6	8.5191		8.5191	-120.122	-122.864
2012-12-17 13:38:40	118.14	120.78	41260.6	8.52605		8.52605	-120.428	-123.119
2012-12-17 13:48:40	118.44	121.11	41260.6	8.53299	41260.6	8.53299	-120.734	-123.456
2012-12-17 13:58:40	118.76	121.46	41260.6	8.53994		8.53994	-121.06	-123.812
2012-12-17 14:08:40	119.06	121.77	41260.6	8.54688		8.54688	-121.366	-124.128
2012-12-17 14:18:40	119.38	122.08	41260.6	8.55383		8.55383	-121.692	-124.444
2012-12-17 14:28:40	119.71	122.43	41260.6	8.56077		8.56077	-122.029	-124.801
2012-12-17 14:38:40	120	122.73	41260.6	8.56772		8.56772	-122.324	-125.107
2012-12-17 14:48:40	120.29	122.98	41260.6	8.57466	41260.6	8.57466	-122.62	-125.362
2012-12-17 14:58:40	120.57	123.29	41260.6	8.5816		8.5816	-122.905	-125.678
2012-12-17 15:08:40	120.89	123.59	41260.6	8.58855		8.58855	-123.231	-125.984
2012-12-17 15:18:40	121.2	123.9	41260.6	8.59549		8.59549	-123.547	-126.3
2012-12-17 15:28:40	121.52	124.22	41260.6	8.60244		8.60244	-123.874	-126.626
2012-12-17 15:38:40	121.85	124.56	41260.7	8.60938		8.60938	-124.21	-126.972
2012-12-17 15:48:40	122.07	124.78	41260.7	8.61633	41260.7	8.61633	-124.434	-127.197
2012-12-17 15:58:40	122.38	125.09	41260.7	8.62327		8.62327	-124.75	-127.513
2012-12-17 16:08:40	122.69	125.4	41260.7	8.63022		8.63022	-125.066	-127.829
2012-12-17 16:18:40	123.01	125.73	41260.7	8.63716		8.63716	-125.392	-128.165
2012-12-17 16:28:40	123.31	125.99	41260.7	8.6441		8.6441	-125.698	-128.43
2012-12-17 16:38:40	123.58	126.26	41260.7	8.65105		8.65105	-125.973	-128.705
2012-12-17 16:48:40	123.88	126.61	41260.7	8.65799	41260.7	8.65799	-126.279	-129.062
2012-12-17 16:58:40	124.2	126.9	41260.7	8.66494		8.66494	-126.606	-129.358
2012-12-17 17:08:40	124.49	127.21	41260.7	8.67188		8.67188	-126.901	-129.674
2012-12-17 17:18:40	124.78	127.52	41260.7	8.67883		8.67883	-127.197	-129.99
2012-12-17 17:28:40	125	127.74	41260.7	8.68577		8.68577	-127.421	-130.214
2012-12-17 17:38:40	125.32	128.04	41260.7	8.69272		8.69272	-127.747	-130.52
2012-12-17 17:48:40	125.6	128.35	41260.7	8.69966	41260.7	8.69966	-128.033	-130.836
2012-12-17 17:58:40	125.9	128.66	41260.7	8.7066		8.7066	-128.338	-131.152
2012-12-17 18:08:40	126.22	128.96	41260.8	8.71355		8.71355	-128.665	-131.458
2012-12-17 18:18:40	126.52	129.28	41260.8	8.72049		8.72049	-128.97	-131.784
2012-12-17 18:28:40	126.79	129.53	41260.8	8.72744		8.72744	-129.246	-132.039
2012-12-17 18:38:40	127.08	129.87	41260.8	8.73438		8.73438	-129.541	-132.385
2012-12-17 18:48:40	127.36	130.14	41260.8	8.74133	41260.8	8.74133	-129.827	-132.661
2012-12-17 18:58:40	127.65	130.42	41260.8	8.74827		8.74827	-130.122	-132.946
2012-12-17 19:08:40	127.95	130.78	41260.8	8.75522		8.75522	-130.428	-133.313
2012-12-17 19:18:40	128.28	131.11	41260.8	8.76216		8.76216	-130.765	-133.649
2012-12-17 19:28:40	128.57	131.36	41260.8	8.7691		8.7691	-131.06	-133.904
2012-12-17 19:38:40	128.85	131.68	41260.8	8.77605		8.77605	-131.346	-134.23
2012-12-17 19:48:40	129.15	132	41260.8	8.78299	41260.8	8.78299	-131.651	-134.557
2012-12-17 19:58:40	129.45	132.3	41260.8	8.78994		8.78994	-131.957	-134.862
2012-12-17 20:08:40	129.74	132.59	41260.8	8.79688		8.79688	-132.253	-135.158
2012-12-17 20:18:40	130.03	132.9	41260.8	8.80383		8.80383	-132.548	-135.474
2012-12-17 20:28:40	130.32	133.19	41260.9	8.81077		8.81077	-132.844	-135.77
2012-12-17 20:38:40	130.61	133.47	41260.9	8.81772		8.81772	-133.14	-136.055
2012-12-17 20:48:40	130.91	133.8	41260.9	8.82466	41260.9	8.82466	-133.445	-136.391
2012-12-17 20:58:40	131.2	134.01	41260.9	8.8316		8.8316	-133.741	-136.606
2012-12-17 21:08:40	131.51	134.38	41260.9	8.83855		8.83855	-134.057	-136.983
2012-12-17 21:18:40	131.78	134.66	41260.9	8.84549		8.84549	-134.332	-137.268
2012-12-17 21:28:40	132.08	134.98	41260.9	8.85244		8.85244	-134.638	-137.594
2012-12-17 21:38:40	132.36	135.27	41260.9	8.85938		8.85938	-134.924	-137.89
2012-12-17 21:48:40	132.64	135.57	41260.9	8.86633	41260.9	8.86633	-135.209	-138.196
2012-12-17 21:58:40	132.93	135.86	41260.9	8.87327		8.87327	-135.505	-138.491
2012-12-17 22:08:40	133.22	136.15	41260.9	8.88022		8.88022	-135.8	-138.787
2012-12-17 22:18:40	133.52	136.45	41260.9	8.88716		8.88716	-136.106	-139.093
2012-12-17 22:28:40	133.79	136.72	41260.9	8.8941		8.8941	-136.381	-139.368
2012-12-17 22:38:40	134.07	137.04	41260.9	8.90105		8.90105	-136.667	-139.694
2012-12-17 22:48:40	134.37	137.34	41261	8.90799	41261	8.90799	-136.972	-140
2012-12-17 22:58:40	134.64	137.63	41261	8.91494		8.91494	-137.248	-140.296
2012-12-17 23:08:40	134.92	137.9	41261	8.92188		8.92188	-137.533	-140.571
2012-12-17 23:18:40	135.19	138.17	41261	8.92883		8.92883	-137.808	-140.846
2012-12-17 23:28:40	135.45	138.46	41261	8.93577		8.93577	-138.073	-141.142
2012-12-17 23:38:40	135.73	138.74	41261	8.94272		8.94272	-138.359	-141.427
2012-12-17 23:48:40	136.01	139.02	41261	8.94966	41261	8.94966	-138.644	-141.713
2012-12-17 23:58:40	136.27	139.06	41261	8.9566		8.9566	-138.909	-141.753
2012-12-18 00:08:40	136.51	139.56	41261	8.96355		8.96355	-139.154	-142.263
2012-12-18 00:18:40	136.8	139.85	41261	8.97049		8.97049	-139.45	-142.559
2012-12-18 00:28:40	137.07	140.14	41261	8.97744		8.97744	-139.725	-142.854
2012-12-18 00:38:40	137.33	140.41	41261	8.98438		8.98438	-139.99	-143.129
2012-12-18 00:48:40	137.6	140.69	41261	8.99133	41261	8.99133	-140.265	-143.415
2012-12-18 00:58:40	137.88	140.97	41261	8.99827		8.99827	-140.55	-143.7
2012-12-18 01:08:40	138.15	141.27	41261	9.00522		9.00522	-140.826	-144.006
2012-12-18 01:18:40	138.41	141.53	41261.1	9.01216		9.01216	-141.091	-144.271
2012-12-18 01:28:40	138.68	141.79	41261.1	9.0191		9.0191	-141.366	-144.536
2012-12-18 01:38:40	138.93	142.05	41261.1	9.02605		9.02605	-141.621	-144.801
2012-12-18 01:48:40	139.19	142.34	41261.1	9.03299	41261.1	9.03299	-141.886	-145.097
2012-12-18 01:58:40	139.46	142.6	41261.1	9.03994		9.03994	-142.161	-145.362
2012-12-18 02:08:40	139.71	142.87	41261.1	9.04688		9.04688	-142.416	-145.637
2012-12-18 02:18:40	139.97	143.15	41261.1	9.05383		9.05383	-142.681	-145.923
2012-12-18 02:28:40	140.23	143.41	41261.1	9.06077		9.06077	-142.946	-146.188
2012-12-18 02:38:40	140.48	143.7	41261.1	9.06772		9.06772	-143.201	-146.483
2012-12-18 02:48:40	140.74	143.97	41261.1	9.07466	41261.1	9.07466	-143.466	-146.758
2012-12-18 02:58:40	141.01	144.23	41261.1	9.0816		9.0816	-143.741	-147.023
2012-12-18 03:08:40	141.25	144.44	41261.1	9.08855		9.08855	-143.986	-147.238
2012-12-18 03:18:40	141.5	144.74	41261.1	9.09549		9.09549	-144.241	-147.543
2012-12-18 03:28:40	141.75	144.98	41261.1	9.10244		9.10244	-144.495	-147.788
2012-12-18 03:38:40	141.99	145.23	41261.2	9.10938		9.10938	-144.74	-148.043
2012-12-18 03:48:40	142.22	145.5	41261.2	9.11633	41261.2	9.11633	-144.975	-148.318
2012-12-18 03:58:40	142.48	145.77	41261.2	9.12327		9.12327	-145.24	-148.593
2012-12-18 04:08:40	142.71	146.02	41261.2	9.13022		9.13022	-145.474	-148.848
2012-12-18 04:18:40	142.97	146.25	41261.2	9.13716		9.13716	-145.739	-149.083
2012-12-18 04:28:40	143.19	146.49	41261.2	9.1441		9.1441	-145.963	-149.327
2012-12-18 04:38:40	143.42	146.75	41261.2	9.15105		9.15105	-146.198	-149.592
2012-12-18 04:48:40	143.66	146.07	41261.2	9.15799	41261.2	9.15799	-146.442	-148.899
2012-12-18 04:58:40	143.89	147.25	41261.2	9.16494		9.16494	-146.677	-150.102
2012-12-18 05:08:40	144.13	147.51	41261.2	9.17188		9.17188	-146.922	-150.367
2012-12-18 05:18:40	144.36	147.74	41261.2	9.17883		9.17883	-147.156	-150.601
2012-12-18 05:28:40	144.6	148	41261.2	9.18577		9.18577	-147.401	-150.866
2012-12-18 05:38:40	144.83	148.25	41261.2	9.19272		9.19272	-147.635	-151.121
2012-12-18 05:48:40	145.07	148.5	41261.2	9.19966	41261.2	9.19966	-147.88	-151.376
2012-12-18 05:58:40	145.29	148.72	41261.2	9.2066		9.2066	-148.104	-151.6
2012-12-18 06:08:40	145.52	148.96	41261.3	9.21355		9.21355	-148.338	-151.845
2012-12-18 06:18:40	145.75	149.23	41261.3	9.22049		9.22049	-148.573	-152.12
2012-12-18 06:28:40	145.97	149.44	41261.3	9.22744		9.22744	-148.797	-152.334
2012-12-18 06:38:40	146.2	149.7	41261.3	9.23438		9.23438	-149.032	-152.599
2012-12-18 06:48:40	146.42	149.95	41261.3	9.24133	41261.3	9.24133	-149.256	-152.854
2012-12-18 06:58:40	146.66	150.17	41261.3	9.24827		9.24827	-149.501	-153.078
2012-12-18 07:08:40	146.87	150.41	41261.3	9.25522		9.25522	-149.715	-153.323
2012-12-18 07:18:40	147.09	150.62	41261.3	9.26216		9.26216	-149.939	-153.537
2012-12-18 07:28:40	147.29	150.85	41261.3	9.2691		9.2691	-150.143	-153.772
2012-12-18 07:38:40	147.5	151.07	41261.3	9.27605		9.27605	-150.357	-153.996
2012-12-18 07:48:40	147.71	151.29	41261.3	9.28299	41261.3	9.28299	-150.571	-154.22
2012-12-18 07:58:40	147.9	151.49	41261.3	9.28994		9.28994	-150.765	-154.424
2012-12-18 08:08:40	148.11	151.71	41261.3	9.29688		9.29688	-150.979	-154.648
2012-12-18 08:18:40	148.3	151.96	41261.3	9.30383		9.30383	-151.172	-154.903
2012-12-18 08:28:40	148.52	152.22	41261.4	9.31077		9.31077	-151.397	-155.168
2012-12-18 08:38:40	148.73	152.42	41261.4	9.31772		9.31772	-151.611	-155.372
2012-12-18 08:48:40	148.95	152.71	41261.4	9.32466	41261.4	9.32466	-151.835	-155.668
2012-12-18 08:58:40	149.15	152.91	41261.4	9.3316		9.3316	-152.039	-155.872
2012-12-18 09:08:40	149.38	153.14	41261.4	9.33855		9.33855	-152.273	-156.106
2012-12-18 09:18:40	149.6	153.37	41261.4	9.34549		9.34549	-152.497	-156.34
2012-12-18 09:28:40	149.8	153.56	41261.4	9.35244		9.35244	-152.701	-156.534
2012-12-18 09:38:40	149.99	153.82	41261.4	9.35938		9.35938	-152.895	-156.799
2012-12-18 09:48:40	150.2	154.04	41261.4	9.36633	41261.4	9.36633	-153.109	-157.023
2012-12-18 09:58:40	150.4	154.25	41261.4	9.37327		9.37327	-153.313	-157.238
2012-12-18 10:08:40	150.6	154.38	41261.4	9.38022		9.38022	-153.517	-157.37
2012-12-18 10:18:40	150.78	154.66	41261.4	9.38716		9.38716	-153.7	-157.655
2012-12-18 10:28:40	150.99	154.87	41261.4	9.3941		9.3941	-153.914	-157.87
2012-12-18 10:38:40	151.2	155.1	41261.4	9.40105		9.40105	-154.128	-158.104
2012-12-18 10:48:40	151.38	155.3	41261.5	9.40799	41261.5	9.40799	-154.312	-158.308
2012-12-18 10:58:40	151.59	155.52	41261.5	9.41494		9.41494	-154.526	-158.532
2012-12-18 11:08:40	151.79	155.74	41261.5	9.42188		9.42188	-154.73	-158.756
2012-12-18 11:18:40	151.99	155.96	41261.5	9.42883		9.42883	-154.934	-158.981
2012-12-18 11:28:40	152.17	156.22	41261.5	9.43577		9.43577	-155.117	-159.246
2012-12-18 11:38:40	152.38	156.43	41261.5	9.44272		9.44272	-155.331	-159.46
2012-12-18 11:48:40	152.58	156.67	41261.5	9.44966	41261.5	9.44966	-155.535	-159.704
2012-12-18 11:58:40	152.79	156.88	41261.5	9.4566		9.4566	-155.749	-159.918
2012-12-18 12:08:40	152.99	157.13	41261.5	9.46355		9.46355	-155.953	-160.173
2012-12-18 12:18:40	153.15	157.27	41261.5	9.47049		9.47049	-156.116	-160.316
2012-12-18 12:28:40	153.32	157.47	41261.5	9.47744		9.47744	-156.29	-160.52
2012-12-18 12:38:40	153.54	157.68	41261.5	9.48438		9.48438	-156.514	-160.734
2012-12-18 12:48:40	153.73	157.91	41261.5	9.49133	41261.5	9.49133	-156.707	-160.968
2012-12-18 12:58:40	153.93	158.15	41261.5	9.49827		9.49827	-156.911	-161.213
2012-12-18 13:08:40	154.13	158.38	41261.5	9.50522		9.50522	-157.115	-161.448
2012-12-18 13:18:40	154.31	158.59	41261.6	9.51216		9.51216	-157.299	-161.662
2012-12-18 13:28:40	154.51	158.8	41261.6	9.5191		9.5191	-157.503	-161.876
2012-12-18 13:38:40	154.72	159.03	41261.6	9.52605		9.52605	-157.717	-162.11
2012-12-18 13:48:40	154.89	159.23	41261.6	9.53299	41261.6	9.53299	-157.89	-162.314
2012-12-18 13:58:40	155.09	159.44	41261.6	9.53994		9.53994	-158.094	-162.528
2012-12-18 14:08:40	155.27	159.67	41261.6	9.54688		9.54688	-158.277	-162.762
2012-12-18 14:18:40	155.47	159.87	41261.6	9.55383		9.55383	-158.481	-162.966
2012-12-18 14:28:40	155.64	160.09	41261.6	9.56077		9.56077	-158.654	-163.191
2012-12-18 14:38:40	155.82	160.31	41261.6	9.56772		9.56772	-158.838	-163.415
2012-12-18 14:48:40	156.02	160.5	41261.6	9.57466	41261.6	9.57466	-159.042	-163.609
2012-12-18 14:58:40	156.2	160.74	41261.6	9.5816		9.5816	-159.225	-163.853
2012-12-18 15:08:40	156.37	160.86	41261.6	9.58855		9.58855	-159.399	-163.976
2012-12-18 15:18:40	156.57	161.14	41261.6	9.59549		9.59549	-159.602	-164.261
2012-12-18 15:28:40	156.75	161.37	41261.6	9.60244		9.60244	-159.786	-164.495
2012-12-18 15:38:40	156.93	161.59	41261.7	9.60938		9.60938	-159.969	-164.72
2012-12-18 15:48:40	157.12	161.75	41261.7	9.61633	41261.7	9.61633	-160.163	-164.883
2012-12-18 15:58:40	157.29	161.98	41261.7	9.62327		9.62327	-160.336	-165.117
2012-12-18 16:08:40	157.47	162.14	41261.7	9.63022		9.63022	-160.52	-165.28
2012-12-18 16:18:40	157.64	162.42	41261.7	9.63716		9.63716	-160.693	-165.566
2012-12-18 16:28:40	156.46	158.44	41261.7	9.6441		9.6441	-159.49	-161.509
2012-12-18 16:38:40	158.03	162.85	41261.7	9.65105		9.65105	-161.091	-166.004
2012-12-18 16:48:40	158.21	163.09	41261.7	9.65799	41261.7	9.65799	-161.274	-166.249
2012-12-18 16:58:40	158.41	163.31	41261.7	9.66494		9.66494	-161.478	-166.473
2012-12-18 17:08:40	158.59	163.5	41261.7	9.67188		9.67188	-161.662	-166.667
2012-12-18 17:18:40	158.77	163.71	41261.7	9.67883		9.67883	-161.845	-166.881
2012-12-18 17:28:40	158.92	163.92	41261.7	9.68577		9.68577	-161.998	-167.095
2012-12-18 17:38:40	159.09	164.14	41261.7	9.69272		9.69272	-162.171	-167.319
2012-12-18 17:48:40	159.29	164.34	41261.7	9.69966	41261.7	9.69966	-162.375	-167.523
2012-12-18 17:58:40	159.48	164.47	41261.7	9.7066		9.7066	-162.569	-167.655
2012-12-18 18:08:40	159.65	164.77	41261.8	9.71355		9.71355	-162.742	-167.961
2012-12-18 18:18:40	159.81	164.94	41261.8	9.72049		9.72049	-162.905	-168.135
2012-12-18 18:28:40	159.99	165.17	41261.8	9.72744		9.72744	-163.089	-168.369
2012-12-18 18:38:40	160.16	165.38	41261.8	9.73438		9.73438	-163.262	-168.583
2012-12-18 18:48:40	160.33	165.6	41261.8	9.74133	41261.8	9.74133	-163.435	-168.807
2012-12-18 18:58:40	160.51	165.79	41261.8	9.74827		9.74827	-163.619	-169.001
2012-12-18 19:08:40	160.68	165.98	41261.8	9.75522		9.75522	-163.792	-169.195
2012-12-18 19:18:40	160.86	166.21	41261.8	9.76216		9.76216	-163.976	-169.429
2012-12-18 19:28:40	161.02	166.42	41261.8	9.7691		9.7691	-164.139	-169.643
2012-12-18 19:38:40	161.21	166.64	41261.8	9.77605		9.77605	-164.332	-169.867
2012-12-18 19:48:40	161.38	166.86	41261.8	9.78299	41261.8	9.78299	-164.506	-170.092
2012-12-18 19:58:40	161.56	167.08	41261.8	9.78994		9.78994	-164.689	-170.316
2012-12-18 20:08:40	161.71	167.26	41261.8	9.79688		9.79688	-164.842	-170.499
2012-12-18 20:18:40	161.89	167.49	41261.8	9.80383		9.80383	-165.025	-170.734
2012-12-18 20:28:40	162.08	167.68	41261.9	9.81077		9.81077	-165.219	-170.928
2012-12-18 20:38:40	162.24	167.89	41261.9	9.81772		9.81772	-165.382	-171.142
2012-12-18 20:48:40	162.41	168.11	41261.9	9.82466	41261.9	9.82466	-165.556	-171.366
2012-12-18 20:58:40	162.57	168.36	41261.9	9.8316		9.8316	-165.719	-171.621
2012-12-18 21:08:40	162.76	168.55	41261.9	9.83855		9.83855	-165.912	-171.814
2012-12-18 21:18:40	162.92	168.78	41261.9	9.84549		9.84549	-166.075	-172.049
2012-12-18 21:28:40	163.08	168.92	41261.9	9.85244		9.85244	-166.239	-172.192
2012-12-18 21:38:40	163.27	169.19	41261.9	9.85938		9.85938	-166.432	-172.467
2012-12-18 21:48:40	163.44	169.4	41261.9	9.86633	41261.9	9.86633	-166.606	-172.681
2012-12-18 21:58:40	163.61	169.59	41261.9	9.87327		9.87327	-166.779	-172.875
2012-12-18 22:08:40	163.78	169.82	41261.9	9.88022		9.88022	-166.952	-173.109
2012-12-18 22:18:40	163.95	170.02	41261.9	9.88716		9.88716	-167.125	-173.313
2012-12-18 22:28:40	164.11	170.2	41261.9	9.8941		9.8941	-167.288	-173.496
2012-12-18 22:38:40	164.27	170.39	41261.9	9.90105		9.90105	-167.452	-173.69
2012-12-18 22:48:40	164.43	170.62	41262	9.90799	41262	9.90799	-167.615	-173.925
2012-12-18 22:58:40	164.59	170.82	41262	9.91494		9.91494	-167.778	-174.128
2012-12-18 23:08:40	164.76	171.03	41262	9.92188		9.92188	-167.951	-174.343
2012-12-18 23:18:40	164.92	171.26	41262	9.92883		9.92883	-168.114	-174.577
2012-12-18 23:28:40	165.08	171.46	41262	9.93577		9.93577	-168.277	-174.781
2012-12-18 23:38:40	165.24	171.68	41262	9.94272		9.94272	-168.44	-175.005
2012-12-18 23:48:40	165.41	171.88	41262	9.94966	41262	9.94966	-168.614	-175.209
2012-12-18 23:58:40	165.58	172.09	41262	9.9566		9.9566	-168.787	-175.423
2012-12-19 00:08:40	165.72	172.3	41262	9.96355		9.96355	-168.93	-175.637
2012-12-19 00:18:40	165.88	172.49	41262	9.97049		9.97049	-169.093	-175.831
2012-12-19 00:28:40	166.04	172.7	41262	9.97744		9.97744	-169.256	-176.045
2012-12-19 00:38:40	166.19	172.88	41262	9.98438		9.98438	-169.409	-176.228
2012-12-19 00:48:40	166.34	173.1	41262	9.99133	41262	9.99133	-169.562	-176.453
2012-12-19 00:58:40	166.51	173.3	41262	9.99827		9.99827	-169.735	-176.656
2012-12-19 01:08:40	166.66	173.48	41262	10.0052		10.0052	-169.888	-176.84
2012-12-19 01:18:40	166.8	173.38	41262.1	10.0122		10.0122	-170.031	-176.738
2012-12-19 01:28:40	166.96	173.91	41262.1	10.0191		10.0191	-170.194	-177.278
2012-12-19 01:38:40	167.12	174.12	41262.1	10.026		10.026	-170.357	-177.492
2012-12-19 01:48:40	167.24	174.34	41262.1	10.033	41262.1	10.033	-170.479	-177.717
2012-12-19 01:58:40	167.41	174.54	41262.1	10.0399		10.0399	-170.652	-177.92
2012-12-19 02:08:40	167.54	174.71	41262.1	10.0469		10.0469	-170.785	-178.094
2012-12-19 02:18:40	167.71	174.93	41262.1	10.0538		10.0538	-170.958	-178.318
2012-12-19 02:28:40	167.83	175.13	41262.1	10.0608		10.0608	-171.081	-178.522
2012-12-19 02:38:40	167.94	175.28	41262.1	10.0677		10.0677	-171.193	-178.675
2012-12-19 02:48:40	168.1	175.47	41262.1	10.0747	41262.1	10.0747	-171.356	-178.869
2012-12-19 02:58:40	168.24	175.67	41262.1	10.0816		10.0816	-171.498	-179.072
2012-12-19 03:08:40	168.38	175.88	41262.1	10.0885		10.0885	-171.641	-179.286
2012-12-19 03:18:40	168.55	176.09	41262.1	10.0955		10.0955	-171.814	-179.501
2012-12-19 03:28:40	168.7	176.32	41262.1	10.1024		10.1024	-171.967	-179.735
2012-12-19 03:38:40	168.86	176.51	41262.2	10.1094		10.1094	-172.13	-179.929
2012-12-19 03:48:40	168.99	176.72	41262.2	10.1163	41262.2	10.1163	-172.263	-180.143
2012-12-19 03:58:40	169.1	176.94	41262.2	10.1233		10.1233	-172.375	-180.367
2012-12-19 04:08:40	169.26	177.14	41262.2	10.1302		10.1302	-172.538	-180.571
2012-12-19 04:18:40	169.42	177.31	41262.2	10.1372		10.1372	-172.701	-180.744
2012-12-19 04:28:40	169.55	177.53	41262.2	10.1441		10.1441	-172.834	-180.968
2012-12-19 04:38:40	169.68	177.72	41262.2	10.151		10.151	-172.966	-181.162
2012-12-19 04:48:40	169.83	177.92	41262.2	10.158	41262.2	10.158	-173.119	-181.366
2012-12-19 04:58:40	169.97	178.13	41262.2	10.1649		10.1649	-173.262	-181.58
2012-12-19 05:08:40	170.12	178.32	41262.2	10.1719		10.1719	-173.415	-181.774
2012-12-19 05:18:40	170.25	178.54	41262.2	10.1788		10.1788	-173.547	-181.998
2012-12-19 05:28:40	170.4	178.75	41262.2	10.1858		10.1858	-173.7	-182.212
2012-12-19 05:38:40	170.54	178.88	41262.2	10.1927		10.1927	-173.843	-182.345
2012-12-19 05:48:40	170.7	179.14	41262.2	10.1997	41262.2	10.1997	-174.006	-182.61
2012-12-19 05:58:40	170.81	179.37	41262.2	10.2066		10.2066	-174.118	-182.844
2012-12-19 06:08:40	170.96	179.59	41262.3	10.2135		10.2135	-174.271	-183.068
2012-12-19 06:18:40	171.08	179.77	41262.3	10.2205		10.2205	-174.393	-183.252
2012-12-19 06:28:40	171.24	179.97	41262.3	10.2274		10.2274	-174.557	-183.456
2012-12-19 06:38:40	171.35	180.17	41262.3	10.2344		10.2344	-174.669	-183.66
2012-12-19 06:48:40	171.49	180.37	41262.3	10.2413	41262.3	10.2413	-174.811	-183.863
2012-12-19 06:58:40	171.6	180.59	41262.3	10.2483		10.2483	-174.924	-184.088
2012-12-19 07:08:40	171.78	180.78	41262.3	10.2552		10.2552	-175.107	-184.281
2012-12-19 07:18:40	171.91	180.99	41262.3	10.2622		10.2622	-175.24	-184.495
2012-12-19 07:28:40	172.03	181.13	41262.3	10.2691		10.2691	-175.362	-184.638
2012-12-19 07:38:40	172.16	181.41	41262.3	10.276		10.276	-175.494	-184.924
2012-12-19 07:48:40	172.29	181.58	41262.3	10.283	41262.3	10.283	-175.627	-185.097
2012-12-19 07:58:40	172.43	181.8	41262.3	10.2899		10.2899	-175.77	-185.321
2012-12-19 08:08:40	172.55	181.95	41262.3	10.2969		10.2969	-175.892	-185.474
2012-12-19 08:18:40	172.73	182.13	41262.3	10.3038		10.3038	-176.075	-185.657
2012-12-19 08:28:40	172.89	182.39	41262.4	10.3108		10.3108	-176.239	-185.923
2012-12-19 08:38:40	173.02	182.64	41262.4	10.3177		10.3177	-176.371	-186.177
2012-12-19 08:48:40	173.17	182.86	41262.4	10.3247	41262.4	10.3247	-176.524	-186.402
2012-12-19 08:58:40	173.3	183.05	41262.4	10.3316		10.3316	-176.656	-186.595
2012-12-19 09:08:40	173.45	183.3	41262.4	10.3385		10.3385	-176.809	-186.85
2012-12-19 09:18:40	173.59	183.48	41262.4	10.3455		10.3455	-176.952	-187.034
2012-12-19 09:28:40	173.7	183.71	41262.4	10.3524		10.3524	-177.064	-187.268
2012-12-19 09:38:40	173.86	183.92	41262.4	10.3594		10.3594	-177.227	-187.482
2012-12-19 09:48:40	173.97	184.13	41262.4	10.3663	41262.4	10.3663	-177.339	-187.696
2012-12-19 09:58:40	174.11	184.35	41262.4	10.3733		10.3733	-177.482	-187.92
2012-12-19 10:08:40	174.23	184.57	41262.4	10.3802		10.3802	-177.604	-188.145
2012-12-19 10:18:40	174.37	184.74	41262.4	10.3872		10.3872	-177.747	-188.318
2012-12-19 10:28:40	174.49	184.95	41262.4	10.3941		10.3941	-177.87	-188.532
2012-12-19 10:38:40	174.62	185.18	41262.4	10.401		10.401	-178.002	-188.767
2012-12-19 10:48:40	174.75	185.34	41262.5	10.408	41262.5	10.408	-178.135	-188.93
2012-12-19 10:58:40	174.89	185.59	41262.5	10.4149		10.4149	-178.277	-189.185
2012-12-19 11:08:40	175.02	185.78	41262.5	10.4219		10.4219	-178.41	-189.378
2012-12-19 11:18:40	175.13	186	41262.5	10.4288		10.4288	-178.522	-189.602
2012-12-19 11:28:40	175.28	186.2	41262.5	10.4358		10.4358	-178.675	-189.806
2012-12-19 11:38:40	175.37	186.41	41262.5	10.4427		10.4427	-178.767	-190.02
2012-12-19 11:48:40	175.55	186.52	41262.5	10.4497	41262.5	10.4497	-178.95	-190.133
2012-12-19 11:58:40	175.67	186.85	41262.5	10.4566		10.4566	-179.072	-190.469
2012-12-19 12:08:40	175.79	187.06	41262.5	10.4635		10.4635	-179.195	-190.683
2012-12-19 12:18:40	175.92	187.27	41262.5	10.4705		10.4705	-179.327	-190.897
2012-12-19 12:28:40	176.06	187.5	41262.5	10.4774		10.4774	-179.47	-191.131
2012-12-19 12:38:40	176.19	187.72	41262.5	10.4844		10.4844	-179.602	-191.356
2012-12-19 12:48:40	176.31	187.89	41262.5	10.4913	41262.5	10.4913	-179.725	-191.529
2012-12-19 12:58:40	176.43	188.12	41262.5	10.4983		10.4983	-179.847	-191.764
2012-12-19 13:08:40	176.58	188.25	41262.5	10.5052		10.5052	-180	-191.896
2012-12-19 13:18:40	176.7	188.51	41262.6	10.5122		10.5122	-180.122	-192.161
2012-12-19 13:28:40	176.82	188.67	41262.6	10.5191		10.5191	-180.245	-192.324
2012-12-19 13:38:40	176.95	188.93	41262.6	10.526		10.526	-180.377	-192.589
2012-12-19 13:48:40	177.1	189.1	41262.6	10.533	41262.6	10.533	-180.53	-192.762
2012-12-19 13:58:40	177.23	189.35	41262.6	10.5399		10.5399	-180.663	-193.017
2012-12-19 14:08:40	177.37	189.36	41262.6	10.5469		10.5469	-180.805	-193.028
2012-12-19 14:18:40	177.46	189.71	41262.6	10.5538		10.5538	-180.897	-193.384
2012-12-19 14:28:40	177.61	189.96	41262.6	10.5608		10.5608	-181.05	-193.639
2012-12-19 14:38:40	177.75	190.15	41262.6	10.5677		10.5677	-181.193	-193.833
2012-12-19 14:48:40	177.86	190.33	41262.6	10.5747	41262.6	10.5747	-181.305	-194.016
2012-12-19 14:58:40	177.97	190.56	41262.6	10.5816		10.5816	-181.417	-194.251
2012-12-19 15:08:40	178.09	190.7	41262.6	10.5885		10.5885	-181.539	-194.393
2012-12-19 15:18:40	178.23	190.94	41262.6	10.5955		10.5955	-181.682	-194.638
2012-12-19 15:28:40	178.35	191.2	41262.6	10.6024		10.6024	-181.804	-194.903
2012-12-19 15:38:40	178.47	191.39	41262.7	10.6094		10.6094	-181.927	-195.097
2012-12-19 15:48:40	178.61	191.61	41262.7	10.6163	41262.7	10.6163	-182.069	-195.321
2012-12-19 15:58:40	178.7	191.83	41262.7	10.6233		10.6233	-182.161	-195.545
2012-12-19 16:08:40	178.85	192.04	41262.7	10.6302		10.6302	-182.314	-195.759
2012-12-19 16:18:40	178.97	192.18	41262.7	10.6372		10.6372	-182.436	-195.902
2012-12-19 16:28:40	179.05	192.39	41262.7	10.6441		10.6441	-182.518	-196.116
2012-12-19 16:38:40	179.18	192.62	41262.7	10.651		10.651	-182.65	-196.351
2012-12-19 16:48:40	178.67	191.84	41262.7	10.658	41262.7	10.658	-182.13	-195.556
2012-12-19 16:58:40	179.98	192.87	41262.7	10.6649		10.6649	-183.466	-196.606
2012-12-19 17:08:40	180.17	193.13	41262.7	10.6719		10.6719	-183.66	-196.871
2012-12-19 17:18:40	180.33	193.37	41262.7	10.6788		10.6788	-183.823	-197.115
2012-12-19 17:28:40	180.5	193.54	41262.7	10.6858		10.6858	-183.996	-197.288
2012-12-19 17:38:40	180.62	193.82	41262.7	10.6927		10.6927	-184.118	-197.574
2012-12-19 17:48:40	180.8	194.07	41262.7	10.6997	41262.7	10.6997	-184.302	-197.829
2012-12-19 17:58:40	180.94	194.27	41262.7	10.7066		10.7066	-184.444	-198.033
2012-12-19 18:08:40	181.07	194.51	41262.8	10.7135		10.7135	-184.577	-198.277
2012-12-19 18:18:40	181.23	194.72	41262.8	10.7205		10.7205	-184.74	-198.491
2012-12-19 18:28:40	181.34	194.92	41262.8	10.7274		10.7274	-184.852	-198.695
2012-12-19 18:38:40	181.47	195.16	41262.8	10.7344		10.7344	-184.985	-198.94
2012-12-19 18:48:40	181.61	195.34	41262.8	10.7413	41262.8	10.7413	-185.127	-199.123
2012-12-19 18:58:40	181.76	195.58	41262.8	10.7483		10.7483	-185.28	-199.368
2012-12-19 19:08:40	181.9	195.78	41262.8	10.7552		10.7552	-185.423	-199.572
2012-12-19 19:18:40	182.04	195.98	41262.8	10.7622		10.7622	-185.566	-199.776
2012-12-19 19:28:40	182.13	196.21	41262.8	10.7691		10.7691	-185.657	-200.01
2012-12-19 19:38:40	182.3	196.45	41262.8	10.776		10.776	-185.831	-200.255
2012-12-19 19:48:40	182.44	196.63	41262.8	10.783	41262.8	10.783	-185.973	-200.438
2012-12-19 19:58:40	182.57	196.89	41262.8	10.7899		10.7899	-186.106	-200.703
2012-12-19 20:08:40	182.68	197.11	41262.8	10.7969		10.7969	-186.218	-200.928
2012-12-19 20:18:40	182.84	197.34	41262.8	10.8038		10.8038	-186.381	-201.162
2012-12-19 20:28:40	182.97	197.54	41262.9	10.8108		10.8108	-186.514	-201.366
2012-12-19 20:38:40	183.09	197.74	41262.9	10.8177		10.8177	-186.636	-201.57
2012-12-19 20:48:40	183.18	197.97	41262.9	10.8247	41262.9	10.8247	-186.728	-201.804
2012-12-19 20:58:40	183.34	198.16	41262.9	10.8316		10.8316	-186.891	-201.998
2012-12-19 21:08:40	183.49	198.33	41262.9	10.8385		10.8385	-187.044	-202.171
2012-12-19 21:18:40	183.6	198.56	41262.9	10.8455		10.8455	-187.156	-202.406
2012-12-19 21:28:40	183.75	198.78	41262.9	10.8524		10.8524	-187.309	-202.63
2012-12-19 21:38:40	183.8	199.03	41262.9	10.8594		10.8594	-187.36	-202.885
2012-12-19 21:48:40	183.93	199.23	41262.9	10.8663	41262.9	10.8663	-187.492	-203.089
2012-12-19 21:58:40	184.14	199.44	41262.9	10.8733		10.8733	-187.706	-203.303
2012-12-19 22:08:40	184.23	199.66	41262.9	10.8802		10.8802	-187.798	-203.527
2012-12-19 22:18:40	184.39	199.87	41262.9	10.8872		10.8872	-187.961	-203.741
2012-12-19 22:28:40	184.51	200.12	41262.9	10.8941		10.8941	-188.084	-203.996
2012-12-19 22:38:40	184.6	200.24	41262.9	10.901		10.901	-188.175	-204.118
2012-12-19 22:48:40	184.78	200.56	41263	10.908	41263	10.908	-188.359	-204.444
2012-12-19 22:58:40	184.92	200.75	41263	10.9149		10.9149	-188.502	-204.638
2012-12-19 23:08:40	185.05	200.94	41263	10.9219		10.9219	-188.634	-204.832
2012-12-19 23:18:40	185.15	201.15	41263	10.9288		10.9288	-188.736	-205.046
2012-12-19 23:28:40	185.24	201.37	41263	10.9358		10.9358	-188.828	-205.27
2012-12-19 23:38:40	185.36	201.52	41263	10.9427		10.9427	-188.95	-205.423
2012-12-19 23:48:40	185.38	201.7	41263	10.9497	41263	10.9497	-188.97	-205.607
2012-12-19 23:58:40	185.59	201.86	41263	10.9566		10.9566	-189.185	-205.77
2012-12-20 00:08:40	185.72	202.16	41263	10.9635		10.9635	-189.317	-206.075
2012-12-20 00:18:40	185.85	202.28	41263	10.9705		10.9705	-189.45	-206.198
2012-12-20 00:28:40	185.98	202.6	41263	10.9774		10.9774	-189.582	-206.524
2012-12-20 00:38:40	186.1	202.78	41263	10.9844		10.9844	-189.704	-206.707
2012-12-20 00:48:40	186.24	203	41263	10.9913	41263	10.9913	-189.847	-206.932
2012-12-20 00:58:40	186.35	203.22	41263	10.9983		10.9983	-189.959	-207.156
2012-12-20 01:08:40	186.45	203.41	41263	11.0052		11.0052	-190.061	-207.35
2012-12-20 01:18:40	186.59	203.63	41263.1	11.0122		11.0122	-190.204	-207.574
2012-12-20 01:28:40	186.75	203.91	41263.1	11.0191		11.0191	-190.367	-207.859
2012-12-20 01:38:40	186.89	204.11	41263.1	11.026		11.026	-190.51	-208.063
2012-12-20 01:48:40	186.99	204.27	41263.1	11.033	41263.1	11.033	-190.612	-208.226
2012-12-20 01:58:40	187.14	204.51	41263.1	11.0399		11.0399	-190.765	-208.471
2012-12-20 02:08:40	187.27	204.71	41263.1	11.0469		11.0469	-190.897	-208.675
2012-12-20 02:18:40	187.38	204.93	41263.1	11.0538		11.0538	-191.009	-208.899
2012-12-20 02:28:40	187.51	205.15	41263.1	11.0608		11.0608	-191.142	-209.123
2012-12-20 02:38:40	187.64	205.33	41263.1	11.0677		11.0677	-191.274	-209.307
2012-12-20 02:48:40	187.74	205.46	41263.1	11.0747	41263.1	11.0747	-191.376	-209.439
2012-12-20 02:58:40	187.85	205.73	41263.1	11.0816		11.0816	-191.488	-209.715
2012-12-20 03:08:40	187.98	205.93	41263.1	11.0885		11.0885	-191.621	-209.918
2012-12-20 03:18:40	188.11	206.16	41263.1	11.0955		11.0955	-191.753	-210.153
2012-12-20 03:28:40	188.22	206.4	41263.1	11.1024		11.1024	-191.865	-210.398
2012-12-20 03:38:40	188.35	206.54	41263.2	11.1094		11.1094	-191.998	-210.54
2012-12-20 03:48:40	188.46	206.77	41263.2	11.1163	41263.2	11.1163	-192.11	-210.775
2012-12-20 03:58:40	188.58	207.05	41263.2	11.1233		11.1233	-192.232	-211.06
2012-12-20 04:08:40	188.69	207.23	41263.2	11.1302		11.1302	-192.345	-211.244
2012-12-20 04:18:40	188.83	207.45	41263.2	11.1372		11.1372	-192.487	-211.468
2012-12-20 04:28:40	188.96	207.67	41263.2	11.1441		11.1441	-192.62	-211.692
2012-12-20 04:38:40	189.08	207.9	41263.2	11.151		11.151	-192.742	-211.927
2012-12-20 04:48:40	189.2	208.12	41263.2	11.158	41263.2	11.158	-192.864	-212.151
2012-12-20 04:58:40	189.33	208.35	41263.2	11.1649		11.1649	-192.997	-212.385
2012-12-20 05:08:40	189.44	208.54	41263.2	11.1719		11.1719	-193.109	-212.579
2012-12-20 05:18:40	189.57	208.73	41263.2	11.1788		11.1788	-193.242	-212.773
2012-12-20 05:28:40	189.7	208.93	41263.2	11.1858		11.1858	-193.374	-212.977
2012-12-20 05:38:40	189.83	209.18	41263.2	11.1927		11.1927	-193.507	-213.231
2012-12-20 05:48:40	189.95	209.4	41263.2	11.1997	41263.2	11.1997	-193.629	-213.456
2012-12-20 05:58:40	190.03	209.5	41263.2	11.2066		11.2066	-193.71	-213.558
2012-12-20 06:08:40	190.17	209.83	41263.3	11.2135		11.2135	-193.853	-213.894
2012-12-20 06:18:40	190.29	210.07	41263.3	11.2205		11.2205	-193.976	-214.139
2012-12-20 06:28:40	190.4	210.1	41263.3	11.2274		11.2274	-194.088	-214.169
2012-12-20 06:38:40	190.54	210.48	41263.3	11.2344		11.2344	-194.23	-214.557
2012-12-20 06:48:40	190.64	210.71	41263.3	11.2413	41263.3	11.2413	-194.332	-214.791
2012-12-20 06:58:40	190.76	210.88	41263.3	11.2483		11.2483	-194.455	-214.964
2012-12-20 07:08:40	190.88	211.14	41263.3	11.2552		11.2552	-194.577	-215.229
2012-12-20 07:18:40	190.99	211.31	41263.3	11.2622		11.2622	-194.689	-215.403
2012-12-20 07:28:40	191.06	211.53	41263.3	11.2691		11.2691	-194.76	-215.627
2012-12-20 07:38:40	191.1	211.66	41263.3	11.276		11.276	-194.801	-215.759
2012-12-20 07:48:40	191.21	211.83	41263.3	11.283	41263.3	11.283	-194.913	-215.933
2012-12-20 07:58:40	191.24	212.04	41263.3	11.2899		11.2899	-194.944	-216.147
2012-12-20 08:08:40	191.35	212.21	41263.3	11.2969		11.2969	-195.056	-216.32
2012-12-20 08:18:40	191.42	212.38	41263.3	11.3038		11.3038	-195.127	-216.493
2012-12-20 08:28:40	188.74	208.73	41263.4	11.3108		11.3108	-192.396	-212.773
2012-12-20 08:38:40	192.77	212.45	41263.4	11.3177		11.3177	-196.504	-216.565
2012-12-20 08:48:40	193.82	212.74	41263.4	11.3247	41263.4	11.3247	-197.574	-216.86
2012-12-20 08:58:40	194.12	213.09	41263.4	11.3316		11.3316	-197.88	-217.217
2012-12-20 09:08:40	194.4	213.31	41263.4	11.3385		11.3385	-198.165	-217.441
2012-12-20 09:18:40	194.66	213.31	41263.4	11.3455		11.3455	-198.43	-217.441
2012-12-20 09:28:40	194.87	213.77	41263.4	11.3524		11.3524	-198.644	-217.91
2012-12-20 09:38:40	194.94	213.88	41263.4	11.3594		11.3594	-198.716	-218.022
2012-12-20 09:48:40	195.23	214.26	41263.4	11.3663	41263.4	11.3663	-199.011	-218.41
2012-12-20 09:58:40	195.41	214.49	41263.4	11.3733		11.3733	-199.195	-218.644
2012-12-20 10:08:40	195.62	214.75	41263.4	11.3802		11.3802	-199.409	-218.909
2012-12-20 10:18:40	195.73	214.93	41263.4	11.3872		11.3872	-199.521	-219.093
2012-12-20 10:28:40	195.81	215.1	41263.4	11.3941		11.3941	-199.602	-219.266
2012-12-20 10:38:40	195.85	215.29	41263.4	11.401		11.401	-199.643	-219.46
2012-12-20 10:48:40	195.87	215.56	41263.5	11.408	41263.5	11.408	-199.664	-219.735
2012-12-20 10:58:40	195.9	215.76	41263.5	11.4149		11.4149	-199.694	-219.939
2012-12-20 11:08:40	195.91	215.92	41263.5	11.4219		11.4219	-199.704	-220.102
2012-12-20 11:18:40	195.95	216.14	41263.5	11.4288		11.4288	-199.745	-220.326
2012-12-20 11:28:40	196	216.3	41263.5	11.4358		11.4358	-199.796	-220.489
2012-12-20 11:38:40	192.07	211.03	41263.5	11.4427		11.4427	-195.79	-215.117
2012-12-20 11:48:40	196.02	216.45	41263.5	11.4497	41263.5	11.4497	-199.817	-220.642
2012-12-20 11:58:40	196.27	216.78	41263.5	11.4566		11.4566	-200.071	-220.979
2012-12-20 12:08:40	196.34	216.97	41263.5	11.4635		11.4635	-200.143	-221.172
2012-12-20 12:18:40	195.23	216.26	41263.5	11.4705		11.4705	-199.011	-220.449
2012-12-20 12:28:40	194.61	214.92	41263.5	11.4774		11.4774	-198.379	-219.083
2012-12-20 12:38:40	196.78	216.89	41263.5	11.4844		11.4844	-200.591	-221.091
2012-12-20 12:48:40	197.65	217.34	41263.5	11.4913	41263.5	11.4913	-201.478	-221.549
2012-12-20 12:58:40	198.19	217.68	41263.5	11.4983		11.4983	-202.029	-221.896
2012-12-20 13:08:40	198.6	218	41263.5	11.5052		11.5052	-202.446	-222.222
2012-12-20 13:18:40	198.76	218.38	41263.6	11.5122		11.5122	-202.61	-222.61
2012-12-20 13:28:40	199.3	218.69	41263.6	11.5191		11.5191	-203.16	-222.926
2012-12-20 13:38:40	199.47	219	41263.6	11.526		11.526	-203.333	-223.242
2012-12-20 13:48:40	199.78	219.28	41263.6	11.533	41263.6	11.533	-203.649	-223.527
2012-12-20 13:58:40	199.89	219.61	41263.6	11.5399		11.5399	-203.761	-223.863
2012-12-20 14:08:40	200.13	219.86	41263.6	11.5469		11.5469	-204.006	-224.118
2012-12-20 14:18:40	200.3	220.19	41263.6	11.5538		11.5538	-204.179	-224.455
2012-12-20 14:28:40	200.49	220.43	41263.6	11.5608		11.5608	-204.373	-224.699
2012-12-20 14:38:40	200.56	220.7	41263.6	11.5677		11.5677	-204.444	-224.975
2012-12-20 14:48:40	200.8	220.99	41263.6	11.5747	41263.6	11.5747	-204.689	-225.27
2012-12-20 14:58:40	200.95	221.12	41263.6	11.5816		11.5816	-204.842	-225.403
2012-12-20 15:08:40	201.14	221.47	41263.6	11.5885		11.5885	-205.036	-225.759
2012-12-20 15:18:40	201.29	221.76	41263.6	11.5955		11.5955	-205.189	-226.055
2012-12-20 15:28:40	201.51	222.07	41263.6	11.6024		11.6024	-205.413	-226.371
2012-12-20 15:38:40	201.57	222.38	41263.7	11.6094		11.6094	-205.474	-226.687
2012-12-20 15:48:40	201.77	222.66	41263.7	11.6163	41263.7	11.6163	-205.678	-226.972
2012-12-20 15:58:40	201.91	222.96	41263.7	11.6233		11.6233	-205.821	-227.278
2012-12-20 16:08:40	202.03	223.15	41263.7	11.6302		11.6302	-205.943	-227.472
2012-12-20 16:18:40	202.16	223.5	41263.7	11.6372		11.6372	-206.075	-227.829
2012-12-20 16:28:40	202.28	223.75	41263.7	11.6441		11.6441	-206.198	-228.084
2012-12-20 16:38:40	202.48	224.07	41263.7	11.651		11.651	-206.402	-228.41
2012-12-20 16:48:40	202.58	224.28	41263.7	11.658	41263.7	11.658	-206.504	-228.624
2012-12-20 16:58:40	202.8	224.6	41263.7	11.6649		11.6649	-206.728	-228.95
2012-12-20 17:08:40	202.9	224.91	41263.7	11.6719		11.6719	-206.83	-229.266
2012-12-20 17:18:40	203.03	225.19	41263.7	11.6788		11.6788	-206.962	-229.551
2012-12-20 17:28:40	201.75	224.61	41263.7	11.6858		11.6858	-205.657	-228.96
2012-12-20 17:38:40	202.79	225.56	41263.7	11.6927		11.6927	-206.718	-229.929
2012-12-20 17:48:40	203.04	225.91	41263.7	11.6997	41263.7	11.6997	-206.972	-230.285
2012-12-20 17:58:40	203.2	226.18	41263.7	11.7066		11.7066	-207.136	-230.561
2012-12-20 18:08:40	203.39	226.5	41263.8	11.7135		11.7135	-207.329	-230.887
2012-12-20 18:18:40	203.32	226.84	41263.8	11.7205		11.7205	-207.258	-231.233
2012-12-20 18:28:40	203.77	227.15	41263.8	11.7274		11.7274	-207.717	-231.549
2012-12-20 18:38:40	203.9	227.47	41263.8	11.7344		11.7344	-207.849	-231.876
2012-12-20 18:48:40	204.11	227.75	41263.8	11.7413	41263.8	11.7413	-208.063	-232.161
2012-12-20 18:58:40	204.26	227.89	41263.8	11.7483		11.7483	-208.216	-232.304
2012-12-20 19:08:40	204.41	228.15	41263.8	11.7552		11.7552	-208.369	-232.569
2012-12-20 19:18:40	204.53	228.47	41263.8	11.7622		11.7622	-208.491	-232.895
2012-12-20 19:28:40	204.7	228.79	41263.8	11.7691		11.7691	-208.665	-233.221
2012-12-20 19:38:40	204.91	229.13	41263.8	11.776		11.776	-208.879	-233.568
2012-12-20 19:48:40	204.88	229.4	41263.8	11.783	41263.8	11.783	-208.848	-233.843
2012-12-20 19:58:40	205.27	229.72	41263.8	11.7899		11.7899	-209.246	-234.169
2012-12-20 20:08:40	205.45	230.02	41263.8	11.7969		11.7969	-209.429	-234.475
2012-12-20 20:18:40	205.6	230.33	41263.8	11.8038		11.8038	-209.582	-234.791
2012-12-20 20:28:40	205.77	230.64	41263.9	11.8108		11.8108	-209.755	-235.107
2012-12-20 20:38:40	205.91	230.91	41263.9	11.8177		11.8177	-209.898	-235.382
2012-12-20 20:48:40	205.96	231.22	41263.9	11.8247	41263.9	11.8247	-209.949	-235.698
2012-12-20 20:58:40	206.19	231.49	41263.9	11.8316		11.8316	-210.183	-235.973
2012-12-20 21:08:40	206.34	231.85	41263.9	11.8385		11.8385	-210.336	-236.34
2012-12-20 21:18:40	206.47	232.19	41263.9	11.8455		11.8455	-210.469	-236.687
2012-12-20 21:28:40	206.64	232.45	41263.9	11.8524		11.8524	-210.642	-236.952
2012-12-20 21:38:40	206.75	232.76	41263.9	11.8594		11.8594	-210.754	-237.268
2012-12-20 21:48:40	206.92	233.04	41263.9	11.8663	41263.9	11.8663	-210.928	-237.554
2012-12-20 21:58:40	207.07	233.29	41263.9	11.8733		11.8733	-211.081	-237.808
2012-12-20 22:08:40	207.22	233.6	41263.9	11.8802		11.8802	-211.233	-238.124
2012-12-20 22:18:40	207.32	233.85	41263.9	11.8872		11.8872	-211.335	-238.379
2012-12-20 22:28:40	207.46	234.11	41263.9	11.8941		11.8941	-211.478	-238.644
2012-12-20 22:38:40	207.62	234.48	41263.9	11.901		11.901	-211.641	-239.021
2012-12-20 22:48:40	207.82	234.82	41264	11.908	41264	11.908	-211.845	-239.368
2012-12-20 22:58:40	207.92	235.09	41264	11.9149		11.9149	-211.947	-239.643
2012-12-20 23:08:40	208.05	235.37	41264	11.9219		11.9219	-212.08	-239.929
2012-12-20 23:18:40	208.24	235.71	41264	11.9288		11.9288	-212.273	-240.275
2012-12-20 23:28:40	208.4	235.99	41264	11.9358		11.9358	-212.436	-240.561
2012-12-20 23:38:40	208.56	236.28	41264	11.9427		11.9427	-212.599	-240.856
2012-12-20 23:48:40	208.75	236.56	41264	11.9497	41264	11.9497	-212.793	-241.142
2012-12-20 23:58:40	208.94	236.81	41264	11.9566		11.9566	-212.987	-241.397
2012-12-21 00:08:40	209.02	237.23	41264	11.9635		11.9635	-213.068	-241.825
2012-12-21 00:18:40	209.1	237.31	41264	11.9705		11.9705	-213.15	-241.906
2012-12-21 00:28:40	209.3	237.84	41264	11.9774		11.9774	-213.354	-242.446
2012-12-21 00:38:40	209.49	238.15	41264	11.9844		11.9844	-213.547	-242.762
2012-12-21 00:48:40	209.64	238.34	41264	11.9913	41264	11.9913	-213.7	-242.956
2012-12-21 00:58:40	209.83	238.76	41264	11.9983		11.9983	-213.894	-243.384
2012-12-21 01:08:40	209.89	239.12	41264	12.0052		12.0052	-213.955	-243.751
2012-12-21 01:18:40	210.11	239.44	41264.1	12.0122		12.0122	-214.179	-244.077
2012-12-21 01:28:40	210.27	239.75	41264.1	12.0191		12.0191	-214.343	-244.393
2012-12-21 01:38:40	210.38	240.12	41264.1	12.026		12.026	-214.455	-244.771
2012-12-21 01:48:40	210.54	240.49	41264.1	12.033	41264.1	12.033	-214.618	-245.148
2012-12-21 01:58:40	210.66	240.82	41264.1	12.0399		12.0399	-214.74	-245.484
2012-12-21 02:08:40	210.83	241.07	41264.1	12.0469		12.0469	-214.913	-245.739
2012-12-21 02:18:40	211.04	241.37	41264.1	12.0538		12.0538	-215.127	-246.045
2012-12-21 02:28:40	211.19	241.76	41264.1	12.0608		12.0608	-215.28	-246.442
2012-12-21 02:38:40	211.29	242.1	41264.1	12.0677		12.0677	-215.382	-246.789
2012-12-21 02:48:40	211.43	242.54	41264.1	12.0747	41264.1	12.0747	-215.525	-247.238
2012-12-21 02:58:40	211.54	242.95	41264.1	12.0816		12.0816	-215.637	-247.655
2012-12-21 03:08:40	211.76	243.22	41264.1	12.0885		12.0885	-215.861	-247.931
2012-12-21 03:18:40	211.93	243.7	41264.1	12.0955		12.0955	-216.035	-248.42
2012-12-21 03:28:40	212.05	243.97	41264.1	12.1024		12.1024	-216.157	-248.695
2012-12-21 03:38:40	212.22	244.38	41264.2	12.1094		12.1094	-216.33	-249.113
2012-12-21 03:48:40	212.38	244.72	41264.2	12.1163	41264.2	12.1163	-216.493	-249.46
2012-12-21 03:58:40	212.51	245.09	41264.2	12.1233		12.1233	-216.626	-249.837
2012-12-21 04:08:40	212.72	245.5	41264.2	12.1302		12.1302	-216.84	-250.255
2012-12-21 04:18:40	212.87	245.77	41264.2	12.1372		12.1372	-216.993	-250.53
2012-12-21 04:28:40	213.03	246.13	41264.2	12.1441		12.1441	-217.156	-250.897
2012-12-21 04:38:40	213.14	246.44	41264.2	12.151		12.151	-217.268	-251.213
2012-12-21 04:48:40	213.33	246.97	41264.2	12.158	41264.2	12.158	-217.462	-251.753
2012-12-21 04:58:40	213.55	247.02	41264.2	12.1649		12.1649	-217.686	-251.804
2012-12-21 05:08:40	213.76	247.66	41264.2	12.1719		12.1719	-217.9	-252.457
2012-12-21 05:18:40	213.85	248.09	41264.2	12.1788		12.1788	-217.992	-252.895
2012-12-21 05:28:40	213.99	248.49	41264.2	12.1858		12.1858	-218.135	-253.303
2012-12-21 05:38:40	214.23	248.87	41264.2	12.1927		12.1927	-218.379	-253.69
2012-12-21 05:48:40	214.43	249.21	41264.2	12.1997	41264.2	12.1997	-218.583	-254.037
2012-12-21 05:58:40	212.78	249.63	41264.2	12.2066		12.2066	-216.901	-254.465
2012-12-21 06:08:40	214.73	249.99	41264.3	12.2135		12.2135	-218.889	-254.832
2012-12-21 06:18:40	214.92	250.45	41264.3	12.2205		12.2205	-219.083	-255.301
2012-12-21 06:28:40	215.07	250.82	41264.3	12.2274		12.2274	-219.235	-255.678
2012-12-21 06:38:40	215.29	251.2	41264.3	12.2344		12.2344	-219.46	-256.065
2012-12-21 06:48:40	215.43	251.54	41264.3	12.2413	41264.3	12.2413	-219.602	-256.412
2012-12-21 06:58:40	215.6	251.83	41264.3	12.2483		12.2483	-219.776	-256.707
2012-12-21 07:08:40	215.76	252.24	41264.3	12.2552		12.2552	-219.939	-257.125
2012-12-21 07:18:40	215.9	252.61	41264.3	12.2622		12.2622	-220.082	-257.503
2012-12-21 07:28:40	216.04	252.9	41264.3	12.2691		12.2691	-220.224	-257.798
2012-12-21 07:38:40	216.24	253.29	41264.3	12.276		12.276	-220.428	-258.196
2012-12-21 07:48:40	216.37	253.34	41264.3	12.283	41264.3	12.283	-220.561	-258.247
2012-12-21 07:58:40	216.53	254.06	41264.3	12.2899		12.2899	-220.724	-258.981
2012-12-21 08:08:40	216.59	254.33	41264.3	12.2969		12.2969	-220.785	-259.256
2012-12-21 08:18:40	204.54	229.62	41264.3	12.3038		12.3038	-208.502	-234.067
2012-12-21 08:28:40	214.42	246.94	41264.4	12.3108		12.3108	-218.573	-251.723
2012-12-21 08:38:40	216.29	252.2	41264.4	12.3177		12.3177	-220.479	-257.085
2012-12-21 08:48:40	216.94	254.37	41264.4	12.3247	41264.4	12.3247	-221.142	-259.297
2012-12-21 08:58:40	217.29	255.05	41264.4	12.3316		12.3316	-221.498	-259.99
2012-12-21 09:08:40	217.61	255.68	41264.4	12.3385		12.3385	-221.825	-260.632
2012-12-21 09:18:40	218.06	256.28	41264.4	12.3455		12.3455	-222.283	-261.244
2012-12-21 09:28:40	218.39	256.83	41264.4	12.3524		12.3524	-222.62	-261.804
2012-12-21 09:38:40	218.75	257.43	41264.4	12.3594		12.3594	-222.987	-262.416
2012-12-21 09:48:40	219.04	258.02	41264.4	12.3663	41264.4	12.3663	-223.282	-263.017
2012-12-21 09:58:40	219.36	258.58	41264.4	12.3733		12.3733	-223.609	-263.588
2012-12-21 10:08:40	219.38	259.06	41264.4	12.3802		12.3802	-223.629	-264.077
2012-12-21 10:18:40	219.67	259.37	41264.4	12.3872		12.3872	-223.925	-264.393
2012-12-21 10:28:40	219.97	259.98	41264.4	12.3941		12.3941	-224.23	-265.015
2012-12-21 10:38:40	220.26	260.51	41264.4	12.401		12.401	-224.526	-265.556
2012-12-21 10:48:40	220.47	261.04	41264.5	12.408	41264.5	12.408	-224.74	-266.096
2012-12-21 10:58:40	220.62	261.45	41264.5	12.4149		12.4149	-224.893	-266.514
2012-12-21 11:08:40	220.81	261.95	41264.5	12.4219		12.4219	-225.087	-267.023
2012-12-21 11:18:40	221.03	262.49	41264.5	12.4288		12.4288	-225.311	-267.574
2012-12-21 11:28:40	221.14	262.94	41264.5	12.4358		12.4358	-225.423	-268.033
2012-12-21 11:38:40	221.29	263.37	41264.5	12.4427		12.4427	-225.576	-268.471
2012-12-21 11:48:40	221.6	263.98	41264.5	12.4497	41264.5	12.4497	-225.892	-269.093
2012-12-21 11:58:40	221.77	264.37	41264.5	12.4566		12.4566	-226.065	-269.49
2012-12-21 12:08:40	221.87	264.92	41264.5	12.4635		12.4635	-226.167	-270.051
2012-12-21 12:18:40	222.05	265.2	41264.5	12.4705		12.4705	-226.351	-270.336
2012-12-21 12:28:40	222.23	265.6	41264.5	12.4774		12.4774	-226.534	-270.744
2012-12-21 12:38:40	222.47	266.34	41264.5	12.4844		12.4844	-226.779	-271.498
2012-12-21 12:48:40	222.6	266.81	41264.5	12.4913	41264.5	12.4913	-226.911	-271.978
2012-12-21 12:58:40	222.74	267.24	41264.5	12.4983		12.4983	-227.054	-272.416
2012-12-21 13:08:40	222.95	267.78	41264.5	12.5052		12.5052	-227.268	-272.966
2012-12-21 13:18:40	223.17	268.22	41264.6	12.5122		12.5122	-227.492	-273.415
2012-12-21 13:28:40	223.31	268.76	41264.6	12.5191		12.5191	-227.635	-273.965
2012-12-21 13:38:40	223.42	269.16	41264.6	12.526		12.526	-227.747	-274.373
2012-12-21 13:48:40	223.44	269.66	41264.6	12.533	41264.6	12.533	-227.768	-274.883
2012-12-21 13:58:40	223.7	270.21	41264.6	12.5399		12.5399	-228.033	-275.443
2012-12-21 14:08:40	224.06	270.74	41264.6	12.5469		12.5469	-228.4	-275.984
2012-12-21 14:18:40	224.15	271.26	41264.6	12.5538		12.5538	-228.491	-276.514
2012-12-21 14:28:40	224.45	271.76	41264.6	12.5608		12.5608	-228.797	-277.023
2012-12-21 14:38:40	224.64	272.26	41264.6	12.5677		12.5677	-228.991	-277.533
2012-12-21 14:48:40	224.81	272.72	41264.6	12.5747	41264.6	12.5747	-229.164	-278.002
2012-12-21 14:58:40	224.93	273.27	41264.6	12.5816		12.5816	-229.286	-278.563
2012-12-21 15:08:40	225.11	273.83	41264.6	12.5885		12.5885	-229.47	-279.134
2012-12-21 15:18:40	225.26	274.27	41264.6	12.5955		12.5955	-229.623	-279.582
2012-12-21 15:28:40	225.58	274.83	41264.6	12.6024		12.6024	-229.949	-280.153
2012-12-21 15:38:40	225.71	275.37	41264.7	12.6094		12.6094	-230.082	-280.703
2012-12-21 15:48:40	225.94	275.84	41264.7	12.6163	41264.7	12.6163	-230.316	-281.182
2012-12-21 15:58:40	226.15	276.48	41264.7	12.6233		12.6233	-230.53	-281.835
2012-12-21 16:08:40	226.26	277.03	41264.7	12.6302		12.6302	-230.642	-282.396
2012-12-21 16:18:40	226.51	277.59	41264.7	12.6372		12.6372	-230.897	-282.966
2012-12-21 16:28:40	226.73	278.23	41264.7	12.6441		12.6441	-231.121	-283.619
2012-12-21 16:38:40	226.96	278.75	41264.7	12.651		12.651	-231.356	-284.149
2012-12-21 16:48:40	227.03	279.26	41264.7	12.658	41264.7	12.658	-231.427	-284.669
2012-12-21 16:58:40	227.18	279.88	41264.7	12.6649		12.6649	-231.58	-285.301
2012-12-21 17:08:40	227.26	280.34	41264.7	12.6719		12.6719	-231.662	-285.77
2012-12-21 17:18:40	227.62	280.85	41264.7	12.6788		12.6788	-232.029	-286.29
2012-12-21 17:28:40	227.82	281.4	41264.7	12.6858		12.6858	-232.232	-286.85
2012-12-21 17:38:40	228.07	282.04	41264.7	12.6927		12.6927	-232.487	-287.503
2012-12-21 17:48:40	228.36	282.67	41264.7	12.6997	41264.7	12.6997	-232.783	-288.145
2012-12-21 17:58:40	228.41	283.1	41264.7	12.7066		12.7066	-232.834	-288.583
2012-12-21 18:08:40	228.71	283.75	41264.8	12.7135		12.7135	-233.14	-289.246
2012-12-21 18:18:40	228.91	284.25	41264.8	12.7205		12.7205	-233.344	-289.755
2012-12-21 18:28:40	227.42	283.68	41264.8	12.7274		12.7274	-231.825	-289.174
2012-12-21 18:38:40	229.81	279.84	41264.8	12.7344		12.7344	-234.261	-285.26
2012-12-21 18:48:40	232.57	284.13	41264.8	12.7413	41264.8	12.7413	-237.074	-289.633
2012-12-21 18:58:40	233.83	285.27	41264.8	12.7483		12.7483	-238.359	-290.795
2012-12-21 19:08:40	234.38	286.19	41264.8	12.7552		12.7552	-238.919	-291.733
2012-12-21 19:18:40	235.11	287.03	41264.8	12.7622		12.7622	-239.664	-292.589
2012-12-21 19:28:40	235.47	287.79	41264.8	12.7691		12.7691	-240.031	-293.364
2012-12-21 19:38:40	235.89	288.57	41264.8	12.776		12.776	-240.459	-294.159
2012-12-21 19:48:40	236.27	289.29	41264.8	12.783	41264.8	12.783	-240.846	-294.893
2012-12-21 19:58:40	236.66	289.97	41264.8	12.7899		12.7899	-241.244	-295.586
2012-12-21 20:08:40	236.87	290.46	41264.8	12.7969		12.7969	-241.458	-296.086
2012-12-21 20:18:40	237.15	291.24	41264.8	12.8038		12.8038	-241.743	-296.881
2012-12-21 20:28:40	237.5	291.82	41264.9	12.8108		12.8108	-242.1	-297.472
2012-12-21 20:38:40	237.66	292.55	41264.9	12.8177		12.8177	-242.263	-298.216
2012-12-21 20:48:40	238.01	293.06	41264.9	12.8247	41264.9	12.8247	-242.62	-298.736
2012-12-21 20:58:40	238.2	293.88	41264.9	12.8316		12.8316	-242.813	-299.572
2012-12-21 21:08:40	238.57	294.55	41264.9	12.8385		12.8385	-243.191	-300.255
2012-12-21 21:18:40	238.9	295.08	41264.9	12.8455		12.8455	-243.527	-300.795
2012-12-21 21:28:40	238.45	295.65	41264.9	12.8524		12.8524	-243.068	-301.376
2012-12-21 21:38:40	239.4	296.25	41264.9	12.8594		12.8594	-244.037	-301.988
2012-12-21 21:48:40	239.57	296.99	41264.9	12.8663	41264.9	12.8663	-244.21	-302.742
[truncated: 1,388 more rows]

## Sheet: Tensi
Zeit [d]	MP bot(2) [cm]	MP top(1) [cm]		air entry bot		AE time	AE [cm]	Type	Pos	Weight
0.00692455	-3.63914	-6.16718		2012-12-30 07:28:20	8800	21.2689	-8970.44	1	2	1
0.0555357	-4.78084	-7.32926
0.0972023	-5.60652	-8.14475		air entry top
0.138869	-6.33028	-8.8787		Time		AE time	AE [cm]	Type	Pos	Weight
0.180536	-7.02345	-9.56167		2012-12-26 22:58:40	8800	17.9149	-8970.44	1	1	1
0.222202	-7.49235	-10.0408
0.263869	-7.97146	-10.4995
0.305536	-8.64424	-11.1723
0.347202	-9.27625	-11.7941
0.388869	-9.84709	-12.3649
0.430536	-10.2956	-12.8033
0.472202	-10.3772	-12.8848
0.520813	-11.0296	-13.5372
0.56248	-11.4577	-13.9857
0.604147	-11.9164	-14.4139
0.652758	-12.4363	-14.9439
0.701369	-12.4975	-14.9949
0.743036	-12.9256	-15.4027
0.784702	-13.1397	-15.6371
0.826369	-13.792	-16.2691
0.868036	-14.2406	-16.6972
0.909702	-14.526	-17.0031
0.951369	-14.9337	-17.4108
0.993036	-15.1376	-17.6147
1.0347	-15.4027	-17.8899
1.07637	-15.6881	-18.1651
1.11804	-15.6881	-18.1651
1.1597	-16.1876	-18.6646
1.20137	-16.4832	-18.9602
1.24304	-16.789	-19.2762
1.2847	-16.9011	-19.3782
1.32637	-17.0438	-19.5209
1.36804	-17.1458	-19.6126
1.4097	-17.4414	-19.949
1.45137	-17.5229	-19.9898
1.49304	-17.6249	-20.0917
1.50799	-17.737	-20.2039
1.51216	-17.7778	-20.2548
1.51633	-17.6962	-20.1631
1.52049	-17.7676	-20.2345
1.52466	-17.7778	-20.2548
1.52883	-17.7268	-20.2039
1.53299	-17.8186	-20.2956
1.53716	-17.788	-20.265
1.54133	-17.8287	-20.265
1.54549	-17.8593	-20.3058
1.57466	-18.0632	-20.5301
1.61633	-18.2467	-20.7034
1.65799	-18.4506	-20.9174
1.69966	-18.7258	-21.213
1.74133	-18.9602	-21.4169
1.78299	-19.1743	-21.6616
1.82466	-19.368	-21.8552
1.86633	-19.5515	-22.0489
1.90799	-19.7961	-22.2732
1.94966	-19.9592	-22.4567
1.99133	-20.1427	-22.6198
2.03299	-20.4077	-22.8746
2.07466	-20.6422	-23.1295
2.11633	-20.7747	-23.2212
2.15799	-20.948	-23.4251
2.19966	-20.8461	-23.3129
2.24133	-21.264	-23.7207
2.28299	-21.4577	-23.9246
2.32466	-21.6106	-24.0877
2.36633	-21.8247	-24.2813
2.40799	-21.947	-24.4241
2.44966	-22.1407	-24.5872
2.49133	-22.212	-24.6789
2.53299	-22.4057	-24.893
2.57466	-22.6198	-25.0866
2.61633	-22.8644	-25.3415
2.65799	-22.946	-25.4128
2.69966	-22.7727	-25.2599
2.74133	-23.2416	-25.7085
2.78299	-23.4964	-25.9735
2.82466	-23.8328	-26.2997
2.86633	-24.0265	-26.5036
2.90799	-24.3221	-26.7992
2.94966	-24.5872	-27.0744
2.99133	-24.8624	-27.3496
3.03299	-25.0153	-27.4924
3.07466	-25.2701	-27.7268
3.11633	-25.5046	-27.9918
3.15799	-25.6983	-28.1753
3.19966	-25.8206	-28.3078
3.24133	-26.0856	-28.5729
3.28299	-26.3303	-28.8277
3.32466	-26.5443	-29.052
3.36633	-26.6871	-29.1641
3.40799	-26.9521	-29.419
3.44966	-27.0846	-29.5617
3.49133	-27.2783	-29.7554
3.53299	-27.421	-29.8981
3.57466	-27.6555	-30.1325
3.61633	-27.9409	-30.4077
3.65799	-28.1651	-30.632
3.69966	-28.1957	-30.6626
3.74133	-28.4098	-30.8665
3.78299	-28.6748	-31.1417
3.82466	-28.8685	-31.3354
3.86633	-29.1539	-31.6208
3.90799	-29.3578	-31.8247
3.94966	-29.6126	-32.0897
3.99133	-29.8981	-32.3649
4.03299	-30.1325	-32.5994
4.07466	-30.3772	-32.8542
4.11633	-30.632	-33.1091
4.15799	-30.8767	-33.3537
4.19966	-31.1519	-33.6188
4.24133	-31.3965	-33.8736
4.28299	-31.6922	-34.159
4.32466	-31.9368	-34.4139
4.36633	-32.2222	-34.6993
4.40799	-32.5892	-35.0459
4.44966	-32.895	-35.3517
4.49133	-33.1906	-35.6575
4.53299	-33.211	-35.6779
4.57466	-33.527	-35.9735
4.61633	-33.9857	-36.422
4.65799	-34.3731	-36.8094
4.69966	-34.8318	-37.2885
4.74133	-35.2905	-37.737
4.78299	-35.7492	-38.1957
4.82466	-36.1672	-38.6239
4.86633	-36.6055	-39.0622
4.90799	-37.0133	-39.4801
4.94966	-37.4516	-39.9185
4.99133	-37.8899	-40.3568
5.03299	-38.3486	-40.8257
5.07466	-38.7971	-41.264
5.11633	-39.2864	-41.7533
5.15799	-39.7146	-42.1814
5.19966	-40.1223	-42.5994
5.24133	-40.5505	-43.0275
5.28299	-40.999	-43.476
5.32466	-41.2742	-43.7615
5.36633	-41.6004	-44.0673
5.40799	-41.947	-44.3731
5.44966	-42.3649	-44.8114
5.49133	-42.7319	-45.1784
5.53299	-43.1193	-45.5454
5.57466	-43.629	-46.0652
5.61633	-44.1081	-46.5443
5.65799	-44.6381	-47.0846
5.69966	-45.1988	-47.6453
5.74133	-45.8002	-48.2365
5.78299	-46.2283	-48.6646
5.82466	-46.9113	-49.2966
5.86633	-47.6045	-49.9898
5.90799	-48.3384	-50.7645
5.94966	-49.001	-51.4169
5.99133	-49.5311	-51.9266
6.03299	-50.1733	-52.5994
6.07466	-50.8461	-53.2416
6.11633	-51.4781	-53.8736
6.15799	-52.1611	-54.5566
6.19966	-52.8542	-55.2701
6.24133	-53.5474	-55.9429
6.28299	-54.1998	-56.6157
6.32466	-54.8624	-57.2681
6.36633	-55.5963	-58.002
6.40799	-56.2385	-58.6544
6.44966	-56.8909	-59.3272
6.49133	-57.5025	-59.8879
6.53299	-58.2773	-60.683
6.57466	-59.0316	-61.4271
6.61633	-59.8267	-62.212
6.65799	-60.6422	-63.0377
6.69966	-61.4883	-63.8838
6.74133	-62.4057	-64.8216
6.78299	-63.4149	-65.8308
6.82466	-64.4139	-66.8196
6.86633	-65.423	-67.8084
6.90799	-66.473	-68.8379
6.94966	-67.472	-69.8777
6.99133	-68.4811	-70.8869
7.03299	-69.5311	-71.9368
7.07466	-70.6116	-73.0275
7.11633	-71.7533	-74.159
7.15799	-72.844	-75.2599
7.19966	-73.945	-76.3303
7.24133	-75.0153	-77.4312
7.28299	-76.1162	-78.5423
7.32466	-77.156	-79.5719
7.36633	-78.2569	-80.6932
7.40799	-79.3782	-81.7941
7.44966	-80.4791	-82.895
7.49133	-81.5494	-84.0265
7.53299	-82.7625	-85.1682
7.57466	-83.9857	-86.473
7.61633	-85.2803	-87.7472
7.65799	-86.473	-88.9501
7.69966	-87.7982	-90.2752
7.74133	-89.1947	-91.6616
7.78299	-90.5912	-93.0785
7.82466	-91.8451	-94.3323
7.86633	-93.2824	-95.79
7.90799	-94.8114	-97.3191
7.94966	-96.2283	-98.7258
7.99133	-97.788	-100.306
8.03299	-99.2864	-101.794
8.07466	-100.856	-103.374
8.11633	-102.559	-105.097
8.15799	-104.098	-106.606
8.19966	-105.77	-108.328
8.24133	-107.533	-110.133
8.28299	-109.439	-112.018
8.32466	-111.315	-113.935
8.36633	-113.221	-115.882
8.40799	-115.076	-117.768
8.44966	-116.871	-119.582
8.49133	-118.828	-121.519
8.53299	-120.734	-123.456
8.57466	-122.62	-125.362
8.61633	-124.434	-127.197
8.65799	-126.279	-129.062
8.69966	-128.033	-130.836
8.74133	-129.827	-132.661
8.78299	-131.651	-134.557
8.82466	-133.445	-136.391
8.86633	-135.209	-138.196
8.90799	-136.972	-140
8.94966	-138.644	-141.713
8.99133	-140.265	-143.415
9.03299	-141.886	-145.097
9.07466	-143.466	-146.758
9.11633	-144.975	-148.318
9.15799	-146.442	-148.899
9.19966	-147.88	-151.376
9.24133	-149.256	-152.854
9.28299	-150.571	-154.22
9.32466	-151.835	-155.668
9.36633	-153.109	-157.023
9.40799	-154.312	-158.308
9.44966	-155.535	-159.704
9.49133	-156.707	-160.968
9.53299	-157.89	-162.314
9.57466	-159.042	-163.609
9.61633	-160.163	-164.883
9.65799	-161.274	-166.249
9.69966	-162.375	-167.523
9.74133	-163.435	-168.807
9.78299	-164.506	-170.092
9.82466	-165.556	-171.366
9.86633	-166.606	-172.681
9.90799	-167.615	-173.925
9.94966	-168.614	-175.209
9.99133	-169.562	-176.453
10.033	-170.479	-177.717
10.0747	-171.356	-178.869
10.1163	-172.263	-180.143
10.158	-173.119	-181.366
10.1997	-174.006	-182.61
10.2413	-174.811	-183.863
10.283	-175.627	-185.097
10.3247	-176.524	-186.402
10.3663	-177.339	-187.696
10.408	-178.135	-188.93
10.4497	-178.95	-190.133
10.4913	-179.725	-191.529
10.533	-180.53	-192.762
10.5747	-181.305	-194.016
10.6163	-182.069	-195.321
10.658	-182.13	-195.556
10.6997	-184.302	-197.829
10.7413	-185.127	-199.123
10.783	-185.973	-200.438
10.8247	-186.728	-201.804
10.8663	-187.492	-203.089
10.908	-188.359	-204.444
10.9497	-188.97	-205.607
10.9913	-189.847	-206.932
11.033	-190.612	-208.226
11.0747	-191.376	-209.439
11.1163	-192.11	-210.775
11.158	-192.864	-212.151
11.1997	-193.629	-213.456
11.2413	-194.332	-214.791
11.283	-194.913	-215.933
11.3247	-197.574	-216.86
11.3663	-199.011	-218.41
11.408	-199.664	-219.735
11.4497	-199.817	-220.642
11.4913	-201.478	-221.549
11.533	-203.649	-223.527
11.5747	-204.689	-225.27
11.6163	-205.678	-226.972
11.658	-206.504	-228.624
11.6997	-206.972	-230.285
11.7413	-208.063	-232.161
11.783	-208.848	-233.843
11.8247	-209.949	-235.698
11.8663	-210.928	-237.554
11.908	-211.845	-239.368
11.9497	-212.793	-241.142
11.9913	-213.7	-242.956
12.033	-214.618	-245.148
12.0747	-215.525	-247.238
12.1163	-216.493	-249.46
12.158	-217.462	-251.753
12.1997	-218.583	-254.037
12.2413	-219.602	-256.412
12.283	-220.561	-258.247
12.3247	-221.142	-259.297
12.3663	-223.282	-263.017
12.408	-224.74	-266.096
12.4497	-225.892	-269.093
12.4913	-226.911	-271.978
12.533	-227.768	-274.883
12.5747	-229.164	-278.002
12.6163	-230.316	-281.182
12.658	-231.427	-284.669
12.6997	-232.783	-288.145
12.7413	-237.074	-289.633
12.783	-240.846	-294.893
12.8247	-242.62	-298.736
12.8663	-244.21	-302.742
12.908	-245.708	-306.718
12.9497	-246.86	-310.724
12.9913	-248.654	-314.822
13.033	-250.173	-318.481
13.0747	-251.611	-323.048
13.1163	-252.885	-327.299
13.158	-254.618	-331.896
13.1997	-256.177	-336.544
13.2413	-257.829	-341.091
13.283	-259.409	-345.902
13.3247	-261.274	-351.101
13.3663	-263.119	-356.473
13.408	-264.638	-361.509
13.4497	-265.963	-367.207
13.4913	-268.104	-373.71
13.533	-269.847	-380.265
13.5747	-272.008	-387.023
13.6163	-274.169	-393.67
13.658	-276.218	-400.826
13.6997	-278.44	-408.206
13.7413	-281.233	-415.861
13.783	-284.332	-420.153
13.8247	-288.522	-430.754
13.8663	-290.907	-439.46
13.908	-293.374	-447.513
13.9497	-295.668	-455.545
13.9913	-297.859	-465.413
14.033	-300.54	-474.251
14.0747	-302.599	-483.802
14.1163	-305.331	-493.496
14.158	-308.726	-503.578
14.1997	-311.988	-513.405
14.2413	-315.78	-524.913
14.283	-318.736	-534.801
14.3247	-283.598	-442.905
14.3663	-335.301	-553.394
14.408	-344.873	-568.899
14.4497	-350.153	-584.2
14.4913	-354.251	-597.859
14.533	-358.338	-611.825
14.5747	-359.266	-624.322
14.6163	-365.923	-640.183
14.658	-370.724	-656.137
14.6997	-376.096	-671.978
14.7413	-380.061	-688.532
14.783	-383.935	-699.939
14.8247	-388.94	-719.256
14.8663	-394.067	-737.339
14.908	-401.121	-755.464
14.9497	-409.215	-774.903
14.9913	-417.278	-797.421
15.033	-425.953	-819.827
15.0747	-435.107	-842.487
15.1163	-443.507	-866.279
15.158	-453.191	-887.89
15.1997	-462.895	-914.73
15.2413	-473.364	-941.162
15.283	-484.669	-966.728
15.3247	-496.412	-995.025
15.3663	-509.052	-1024.28
15.408	-519.898	-1057.06
15.4497	-532.09	-1089.25
15.4913	-546.463	-1124.28
15.533	-563.945	-1161.09
15.5747	-580.214	-1183.12
15.6163	-594.475	-1227.66
15.658	-609.215	-1267.77
15.6997	-625.036	-1310.93
15.7483	-642.62	-1359.91
15.783	-663.558
15.8247	-687.074
15.8663	-710.765
15.908	-733.16
15.9219	-742.334

## Sheet: HYDRUS
Data für die Zielfunktion: 2 x Tensionen, 1 x Endwassergehalt						Verdunstungsrate
Time	Obs	Type	Pos	Weight		Zeitintervall		Evarate [cm/d]		Type	1-Tension	2-Wassergehalt
0.00692455	-3.63914	1	2	1		0.453459	0	0.449432		Pos	1-top	2-bot	(von oben nach unten)
0.0555357	-4.78084	1	2	1		1.35007	0	0.3899		33	Time-Variable boundary conditions+
0.0972023	-5.60652	1	2	1		1.69501	0	0.339813		22.215	Final Time	Time Information
0.138869	-6.33028	1	2	1		1.92426	0	0.324462		814	Inverse Data Points
0.180536	-7.02345	1	2	1		2.45508	0	0.336632		56.7822	BC-top	[hPa]
0.222202	-7.49235	1	2	1		2.68669	0	0.353015		58.0322	tens_top_ini	[hPa]	1
0.263869	-7.97146	1	2	1		3.34909	0	0.386693		121.309	tens_bot_ini	[hPa]	2
0.305536	-8.64424	1	2	1		3.68694	0	0.373635		122.559	BC-bot	[hPa]
0.347202	-9.27625	1	2	1		4.3731	0	0.35001
0.388869	-9.84709	1	2	1		4.87444	0	0.382582		-7.24388
0.430536	-10.2956	1	2	1		5.34846	0	0.380419		-5.99388
0.472202	-10.3772	1	2	1		5.79272	0	0.339947		-3.46585
0.520813	-11.0296	1	2	1		6.44834	0	0.321619		-2.21585
0.56248	-11.4577	1	2	1		7.56943	0	0.287522
0.604147	-11.9164	1	2	1		8.33459	0	0.286556
0.652758	-12.4363	1	2	1		9.31154	0	0.264919
0.701369	-12.4975	1	2	1		9.64391	0	0.257093
0.743036	-12.9256	1	2	1		10.2976	0	0.255163
0.784702	-13.1397	1	2	1		10.654	0	0.261067
0.826369	-13.792	1	2	1		11.3087	0	0.244146
0.868036	-14.2406	1	2	1		11.6827	0	0.243254
0.909702	-14.526	1	2	1		12.3021	0	0.213389
0.951369	-14.9337	1	2	1		12.7283	0	0.190396
0.993036	-15.1376	1	2	1		13.367	0	0.160094
1.0347	-15.4027	1	2	1		13.7621	0	0.133809
1.07637	-15.6881	1	2	1		14.3243	0	0.115915
1.11804	-15.6881	1	2	1		16.4478	0	0.0861725
1.1597	-16.1876	1	2	1		17.5693	0	0.0707102
1.20137	-16.4832	1	2	1		18.4593	0	0.0619404
1.24304	-16.789	1	2	1		18.7167	0	0.0565244
1.2847	-16.9011	1	2	1		19.3634	0	0.0570307
1.32637	-17.0438	1	2	1		20.3608	0	0.0495156
1.36804	-17.1458	1	2	1		22.215	0	0.034343
1.4097	-17.4414	1	2	1
1.45137	-17.5229	1	2	1
1.49304	-17.6249	1	2	1
1.50799	-17.737	1	2	1
1.51216	-17.7778	1	2	1
1.51633	-17.6962	1	2	1
1.52049	-17.7676	1	2	1
1.52466	-17.7778	1	2	1
1.52883	-17.7268	1	2	1
1.53299	-17.8186	1	2	1
1.53716	-17.788	1	2	1
1.54133	-17.8287	1	2	1
1.54549	-17.8593	1	2	1
1.57466	-18.0632	1	2	1
1.61633	-18.2467	1	2	1
1.65799	-18.4506	1	2	1
1.69966	-18.7258	1	2	1
1.74133	-18.9602	1	2	1
1.78299	-19.1743	1	2	1
1.82466	-19.368	1	2	1
1.86633	-19.5515	1	2	1
1.90799	-19.7961	1	2	1
1.94966	-19.9592	1	2	1
1.99133	-20.1427	1	2	1
2.03299	-20.4077	1	2	1
2.07466	-20.6422	1	2	1
2.11633	-20.7747	1	2	1
2.15799	-20.948	1	2	1
2.19966	-20.8461	1	2	1
2.24133	-21.264	1	2	1
2.28299	-21.4577	1	2	1
2.32466	-21.6106	1	2	1
2.36633	-21.8247	1	2	1
2.40799	-21.947	1	2	1
2.44966	-22.1407	1	2	1
2.49133	-22.212	1	2	1
2.53299	-22.4057	1	2	1
2.57466	-22.6198	1	2	1
2.61633	-22.8644	1	2	1
2.65799	-22.946	1	2	1
2.69966	-22.7727	1	2	1
2.74133	-23.2416	1	2	1
2.78299	-23.4964	1	2	1
2.82466	-23.8328	1	2	1
2.86633	-24.0265	1	2	1
2.90799	-24.3221	1	2	1
2.94966	-24.5872	1	2	1
2.99133	-24.8624	1	2	1
3.03299	-25.0153	1	2	1
3.07466	-25.2701	1	2	1
3.11633	-25.5046	1	2	1
3.15799	-25.6983	1	2	1
3.19966	-25.8206	1	2	1
3.24133	-26.0856	1	2	1
3.28299	-26.3303	1	2	1
3.32466	-26.5443	1	2	1
3.36633	-26.6871	1	2	1
3.40799	-26.9521	1	2	1
3.44966	-27.0846	1	2	1
3.49133	-27.2783	1	2	1
3.53299	-27.421	1	2	1
3.57466	-27.6555	1	2	1
3.61633	-27.9409	1	2	1
3.65799	-28.1651	1	2	1
3.69966	-28.1957	1	2	1
3.74133	-28.4098	1	2	1
3.78299	-28.6748	1	2	1
3.82466	-28.8685	1	2	1
3.86633	-29.1539	1	2	1
3.90799	-29.3578	1	2	1
3.94966	-29.6126	1	2	1
3.99133	-29.8981	1	2	1
4.03299	-30.1325	1	2	1
4.07466	-30.3772	1	2	1
4.11633	-30.632	1	2	1
4.15799	-30.8767	1	2	1
4.19966	-31.1519	1	2	1
4.24133	-31.3965	1	2	1
4.28299	-31.6922	1	2	1
4.32466	-31.9368	1	2	1
4.36633	-32.2222	1	2	1
4.40799	-32.5892	1	2	1
4.44966	-32.895	1	2	1
4.49133	-33.1906	1	2	1
4.53299	-33.211	1	2	1
4.57466	-33.527	1	2	1
4.61633	-33.9857	1	2	1
4.65799	-34.3731	1	2	1
4.69966	-34.8318	1	2	1
4.74133	-35.2905	1	2	1
4.78299	-35.7492	1	2	1
4.82466	-36.1672	1	2	1
4.86633	-36.6055	1	2	1
4.90799	-37.0133	1	2	1
4.94966	-37.4516	1	2	1
4.99133	-37.8899	1	2	1
5.03299	-38.3486	1	2	1
5.07466	-38.7971	1	2	1
5.11633	-39.2864	1	2	1
5.15799	-39.7146	1	2	1
5.19966	-40.1223	1	2	1
5.24133	-40.5505	1	2	1
5.28299	-40.999	1	2	1
5.32466	-41.2742	1	2	1
5.36633	-41.6004	1	2	1
5.40799	-41.947	1	2	1
5.44966	-42.3649	1	2	1
5.49133	-42.7319	1	2	1
5.53299	-43.1193	1	2	1
5.57466	-43.629	1	2	1
5.61633	-44.1081	1	2	1
5.65799	-44.6381	1	2	1
5.69966	-45.1988	1	2	1
5.74133	-45.8002	1	2	1
5.78299	-46.2283	1	2	1
5.82466	-46.9113	1	2	1
5.86633	-47.6045	1	2	1
5.90799	-48.3384	1	2	1
5.94966	-49.001	1	2	1
5.99133	-49.5311	1	2	1
6.03299	-50.1733	1	2	1
6.07466	-50.8461	1	2	1
6.11633	-51.4781	1	2	1
6.15799	-52.1611	1	2	1
6.19966	-52.8542	1	2	1
6.24133	-53.5474	1	2	1
6.28299	-54.1998	1	2	1
6.32466	-54.8624	1	2	1
6.36633	-55.5963	1	2	1
6.40799	-56.2385	1	2	1
6.44966	-56.8909	1	2	1
6.49133	-57.5025	1	2	1
6.53299	-58.2773	1	2	1
6.57466	-59.0316	1	2	1
6.61633	-59.8267	1	2	1
6.65799	-60.6422	1	2	1
6.69966	-61.4883	1	2	1
6.74133	-62.4057	1	2	1
6.78299	-63.4149	1	2	1
6.82466	-64.4139	1	2	1
6.86633	-65.423	1	2	1
6.90799	-66.473	1	2	1
6.94966	-67.472	1	2	1
6.99133	-68.4811	1	2	1
7.03299	-69.5311	1	2	1
7.07466	-70.6116	1	2	1
7.11633	-71.7533	1	2	1
7.15799	-72.844	1	2	1
7.19966	-73.945	1	2	1
7.24133	-75.0153	1	2	1
7.28299	-76.1162	1	2	1
7.32466	-77.156	1	2	1
7.36633	-78.2569	1	2	1
7.40799	-79.3782	1	2	1
7.44966	-80.4791	1	2	1
7.49133	-81.5494	1	2	1
7.53299	-82.7625	1	2	1
7.57466	-83.9857	1	2	1
7.61633	-85.2803	1	2	1
7.65799	-86.473	1	2	1
7.69966	-87.7982	1	2	1
7.74133	-89.1947	1	2	1
7.78299	-90.5912	1	2	1
7.82466	-91.8451	1	2	1
7.86633	-93.2824	1	2	1
7.90799	-94.8114	1	2	1
7.94966	-96.2283	1	2	1
7.99133	-97.788	1	2	1
8.03299	-99.2864	1	2	1
8.07466	-100.856	1	2	1
8.11633	-102.559	1	2	1
8.15799	-104.098	1	2	1
8.19966	-105.77	1	2	1
8.24133	-107.533	1	2	1
8.28299	-109.439	1	2	1
8.32466	-111.315	1	2	1
8.36633	-113.221	1	2	1
8.40799	-115.076	1	2	1
8.44966	-116.871	1	2	1
8.49133	-118.828	1	2	1
8.53299	-120.734	1	2	1
8.57466	-122.62	1	2	1
8.61633	-124.434	1	2	1
8.65799	-126.279	1	2	1
8.69966	-128.033	1	2	1
8.74133	-129.827	1	2	1
8.78299	-131.651	1	2	1
8.82466	-133.445	1	2	1
8.86633	-135.209	1	2	1
8.90799	-136.972	1	2	1
8.94966	-138.644	1	2	1
8.99133	-140.265	1	2	1
9.03299	-141.886	1	2	1
9.07466	-143.466	1	2	1
9.11633	-144.975	1	2	1
9.15799	-146.442	1	2	1
9.19966	-147.88	1	2	1
9.24133	-149.256	1	2	1
9.28299	-150.571	1	2	1
9.32466	-151.835	1	2	1
9.36633	-153.109	1	2	1
9.40799	-154.312	1	2	1
9.44966	-155.535	1	2	1
9.49133	-156.707	1	2	1
9.53299	-157.89	1	2	1
9.57466	-159.042	1	2	1
9.61633	-160.163	1	2	1
9.65799	-161.274	1	2	1
9.69966	-162.375	1	2	1
9.74133	-163.435	1	2	1
9.78299	-164.506	1	2	1
9.82466	-165.556	1	2	1
9.86633	-166.606	1	2	1
9.90799	-167.615	1	2	1
9.94966	-168.614	1	2	1
9.99133	-169.562	1	2	1
10.033	-170.479	1	2	1
10.0747	-171.356	1	2	1
10.1163	-172.263	1	2	1
10.158	-173.119	1	2	1
10.1997	-174.006	1	2	1
10.2413	-174.811	1	2	1
10.283	-175.627	1	2	1
10.3247	-176.524	1	2	1
10.3663	-177.339	1	2	1
10.408	-178.135	1	2	1
10.4497	-178.95	1	2	1
10.4913	-179.725	1	2	1
10.533	-180.53	1	2	1
10.5747	-181.305	1	2	1
10.6163	-182.069	1	2	1
10.658	-182.13	1	2	1
10.6997	-184.302	1	2	1
10.7413	-185.127	1	2	1
10.783	-185.973	1	2	1
10.8247	-186.728	1	2	1
10.8663	-187.492	1	2	1
10.908	-188.359	1	2	1
10.9497	-188.97	1	2	1
10.9913	-189.847	1	2	1
11.033	-190.612	1	2	1
11.0747	-191.376	1	2	1
11.1163	-192.11	1	2	1
11.158	-192.864	1	2	1
11.1997	-193.629	1	2	1
11.2413	-194.332	1	2	1
11.283	-194.913	1	2	1
11.3247	-197.574	1	2	1
11.3663	-199.011	1	2	1
11.408	-199.664	1	2	1
11.4497	-199.817	1	2	1
11.4913	-201.478	1	2	1
11.533	-203.649	1	2	1
11.5747	-204.689	1	2	1
11.6163	-205.678	1	2	1
11.658	-206.504	1	2	1
11.6997	-206.972	1	2	1
11.7413	-208.063	1	2	1
11.783	-208.848	1	2	1
11.8247	-209.949	1	2	1
11.8663	-210.928	1	2	1
11.908	-211.845	1	2	1
11.9497	-212.793	1	2	1
11.9913	-213.7	1	2	1
12.033	-214.618	1	2	1
12.0747	-215.525	1	2	1
12.1163	-216.493	1	2	1
12.158	-217.462	1	2	1
12.1997	-218.583	1	2	1
12.2413	-219.602	1	2	1
12.283	-220.561	1	2	1
12.3247	-221.142	1	2	1
12.3663	-223.282	1	2	1
12.408	-224.74	1	2	1
12.4497	-225.892	1	2	1
12.4913	-226.911	1	2	1
12.533	-227.768	1	2	1
12.5747	-229.164	1	2	1
12.6163	-230.316	1	2	1
12.658	-231.427	1	2	1
12.6997	-232.783	1	2	1
12.7413	-237.074	1	2	1
12.783	-240.846	1	2	1
12.8247	-242.62	1	2	1
12.8663	-244.21	1	2	1
12.908	-245.708	1	2	1
12.9497	-246.86	1	2	1
12.9913	-248.654	1	2	1
13.033	-250.173	1	2	1
13.0747	-251.611	1	2	1
13.1163	-252.885	1	2	1
13.158	-254.618	1	2	1
13.1997	-256.177	1	2	1
13.2413	-257.829	1	2	1
13.283	-259.409	1	2	1
13.3247	-261.274	1	2	1
13.3663	-263.119	1	2	1
13.408	-264.638	1	2	1
13.4497	-265.963	1	2	1
13.4913	-268.104	1	2	1
13.533	-269.847	1	2	1
13.5747	-272.008	1	2	1
13.6163	-274.169	1	2	1
13.658	-276.218	1	2	1
13.6997	-278.44	1	2	1
13.7413	-281.233	1	2	1
13.783	-284.332	1	2	1
13.8247	-288.522	1	2	1
13.8663	-290.907	1	2	1
13.908	-293.374	1	2	1
13.9497	-295.668	1	2	1
13.9913	-297.859	1	2	1
14.033	-300.54	1	2	1
14.0747	-302.599	1	2	1
14.1163	-305.331	1	2	1
14.158	-308.726	1	2	1
14.1997	-311.988	1	2	1
14.2413	-315.78	1	2	1
14.283	-318.736	1	2	1
14.3247	-283.598	1	2	1
14.3663	-335.301	1	2	1
14.408	-344.873	1	2	1
14.4497	-350.153	1	2	1
14.4913	-354.251	1	2	1
14.533	-358.338	1	2	1
14.5747	-359.266	1	2	1
14.6163	-365.923	1	2	1
14.658	-370.724	1	2	1
14.6997	-376.096	1	2	1
14.7413	-380.061	1	2	1
14.783	-383.935	1	2	1
14.8247	-388.94	1	2	1
14.8663	-394.067	1	2	1
14.908	-401.121	1	2	1
14.9497	-409.215	1	2	1
14.9913	-417.278	1	2	1
15.033	-425.953	1	2	1
15.0747	-435.107	1	2	1
15.1163	-443.507	1	2	1
15.158	-453.191	1	2	1
15.1997	-462.895	1	2	1
15.2413	-473.364	1	2	1
15.283	-484.669	1	2	1
15.3247	-496.412	1	2	1
15.3663	-509.052	1	2	1
15.408	-519.898	1	2	1
15.4497	-532.09	1	2	1
15.4913	-546.463	1	2	1
15.533	-563.945	1	2	1
15.5747	-580.214	1	2	1
15.6163	-594.475	1	2	1
15.658	-609.215	1	2	1
15.6997	-625.036	1	2	1
15.7483	-642.62	1	2	1
15.783	-663.558	1	2	1
15.8247	-687.074	1	2	1
15.8663	-710.765	1	2	1
15.908	-733.16	1	2	1
15.9219	-742.334	1	2	1
21.2689	-8970.44	1	2	1
0.00692455	-6.16718	1	1	1
0.0555357	-7.32926	1	1	1
0.0972023	-8.14475	1	1	1
0.138869	-8.8787	1	1	1
0.180536	-9.56167	1	1	1
0.222202	-10.0408	1	1	1
0.263869	-10.4995	1	1	1
0.305536	-11.1723	1	1	1
0.347202	-11.7941	1	1	1
0.388869	-12.3649	1	1	1
0.430536	-12.8033	1	1	1
0.472202	-12.8848	1	1	1
0.520813	-13.5372	1	1	1
0.56248	-13.9857	1	1	1
0.604147	-14.4139	1	1	1
0.652758	-14.9439	1	1	1
0.701369	-14.9949	1	1	1
0.743036	-15.4027	1	1	1
0.784702	-15.6371	1	1	1
0.826369	-16.2691	1	1	1
0.868036	-16.6972	1	1	1
0.909702	-17.0031	1	1	1
0.951369	-17.4108	1	1	1
0.993036	-17.6147	1	1	1
1.0347	-17.8899	1	1	1
1.07637	-18.1651	1	1	1
1.11804	-18.1651	1	1	1
1.1597	-18.6646	1	1	1
1.20137	-18.9602	1	1	1
1.24304	-19.2762	1	1	1
1.2847	-19.3782	1	1	1
1.32637	-19.5209	1	1	1
1.36804	-19.6126	1	1	1
1.4097	-19.949	1	1	1
1.45137	-19.9898	1	1	1
1.49304	-20.0917	1	1	1
1.50799	-20.2039	1	1	1
1.51216	-20.2548	1	1	1
1.51633	-20.1631	1	1	1
1.52049	-20.2345	1	1	1
1.52466	-20.2548	1	1	1
1.52883	-20.2039	1	1	1
1.53299	-20.2956	1	1	1
1.53716	-20.265	1	1	1
1.54133	-20.265	1	1	1
1.54549	-20.3058	1	1	1
1.57466	-20.5301	1	1	1
1.61633	-20.7034	1	1	1
1.65799	-20.9174	1	1	1
1.69966	-21.213	1	1	1
1.74133	-21.4169	1	1	1
1.78299	-21.6616	1	1	1
1.82466	-21.8552	1	1	1
1.86633	-22.0489	1	1	1
1.90799	-22.2732	1	1	1
1.94966	-22.4567	1	1	1
1.99133	-22.6198	1	1	1
2.03299	-22.8746	1	1	1
2.07466	-23.1295	1	1	1
2.11633	-23.2212	1	1	1
2.15799	-23.4251	1	1	1
2.19966	-23.3129	1	1	1
2.24133	-23.7207	1	1	1
2.28299	-23.9246	1	1	1
2.32466	-24.0877	1	1	1
2.36633	-24.2813	1	1	1
2.40799	-24.4241	1	1	1
2.44966	-24.5872	1	1	1
2.49133	-24.6789	1	1	1
2.53299	-24.893	1	1	1
2.57466	-25.0866	1	1	1
2.61633	-25.3415	1	1	1
2.65799	-25.4128	1	1	1
2.69966	-25.2599	1	1	1
2.74133	-25.7085	1	1	1
2.78299	-25.9735	1	1	1
2.82466	-26.2997	1	1	1
2.86633	-26.5036	1	1	1
2.90799	-26.7992	1	1	1
2.94966	-27.0744	1	1	1
2.99133	-27.3496	1	1	1
3.03299	-27.4924	1	1	1
3.07466	-27.7268	1	1	1
3.11633	-27.9918	1	1	1
3.15799	-28.1753	1	1	1
3.19966	-28.3078	1	1	1
3.24133	-28.5729	1	1	1
3.28299	-28.8277	1	1	1
3.32466	-29.052	1	1	1
3.36633	-29.1641	1	1	1
3.40799	-29.419	1	1	1
3.44966	-29.5617	1	1	1
3.49133	-29.7554	1	1	1
3.53299	-29.8981	1	1	1
3.57466	-30.1325	1	1	1
3.61633	-30.4077	1	1	1
3.65799	-30.632	1	1	1
3.69966	-30.6626	1	1	1
3.74133	-30.8665	1	1	1
3.78299	-31.1417	1	1	1
3.82466	-31.3354	1	1	1
3.86633	-31.6208	1	1	1
3.90799	-31.8247	1	1	1
3.94966	-32.0897	1	1	1
3.99133	-32.3649	1	1	1
4.03299	-32.5994	1	1	1
4.07466	-32.8542	1	1	1
4.11633	-33.1091	1	1	1
4.15799	-33.3537	1	1	1
4.19966	-33.6188	1	1	1
4.24133	-33.8736	1	1	1
4.28299	-34.159	1	1	1
4.32466	-34.4139	1	1	1
4.36633	-34.6993	1	1	1
4.40799	-35.0459	1	1	1
4.44966	-35.3517	1	1	1
4.49133	-35.6575	1	1	1
4.53299	-35.6779	1	1	1
4.57466	-35.9735	1	1	1
4.61633	-36.422	1	1	1
4.65799	-36.8094	1	1	1
4.69966	-37.2885	1	1	1
4.74133	-37.737	1	1	1
4.78299	-38.1957	1	1	1
4.82466	-38.6239	1	1	1
4.86633	-39.0622	1	1	1
4.90799	-39.4801	1	1	1
4.94966	-39.9185	1	1	1
4.99133	-40.3568	1	1	1
5.03299	-40.8257	1	1	1
5.07466	-41.264	1	1	1
5.11633	-41.7533	1	1	1
5.15799	-42.1814	1	1	1
5.19966	-42.5994	1	1	1
5.24133	-43.0275	1	1	1
5.28299	-43.476	1	1	1
5.32466	-43.7615	1	1	1
5.36633	-44.0673	1	1	1
5.40799	-44.3731	1	1	1
5.44966	-44.8114	1	1	1
5.49133	-45.1784	1	1	1
5.53299	-45.5454	1	1	1
5.57466	-46.0652	1	1	1
5.61633	-46.5443	1	1	1
5.65799	-47.0846	1	1	1
5.69966	-47.6453	1	1	1
5.74133	-48.2365	1	1	1
5.78299	-48.6646	1	1	1
5.82466	-49.2966	1	1	1
5.86633	-49.9898	1	1	1
5.90799	-50.7645	1	1	1
5.94966	-51.4169	1	1	1
5.99133	-51.9266	1	1	1
6.03299	-52.5994	1	1	1
6.07466	-53.2416	1	1	1
6.11633	-53.8736	1	1	1
6.15799	-54.5566	1	1	1
6.19966	-55.2701	1	1	1
6.24133	-55.9429	1	1	1
6.28299	-56.6157	1	1	1
6.32466	-57.2681	1	1	1
6.36633	-58.002	1	1	1
6.40799	-58.6544	1	1	1
6.44966	-59.3272	1	1	1
6.49133	-59.8879	1	1	1
6.53299	-60.683	1	1	1
6.57466	-61.4271	1	1	1
6.61633	-62.212	1	1	1
6.65799	-63.0377	1	1	1
6.69966	-63.8838	1	1	1
6.74133	-64.8216	1	1	1
6.78299	-65.8308	1	1	1
6.82466	-66.8196	1	1	1
6.86633	-67.8084	1	1	1
6.90799	-68.8379	1	1	1
6.94966	-69.8777	1	1	1
6.99133	-70.8869	1	1	1
7.03299	-71.9368	1	1	1
7.07466	-73.0275	1	1	1
7.11633	-74.159	1	1	1
7.15799	-75.2599	1	1	1
7.19966	-76.3303	1	1	1
7.24133	-77.4312	1	1	1
7.28299	-78.5423	1	1	1
7.32466	-79.5719	1	1	1
7.36633	-80.6932	1	1	1
7.40799	-81.7941	1	1	1
7.44966	-82.895	1	1	1
7.49133	-84.0265	1	1	1
7.53299	-85.1682	1	1	1
7.57466	-86.473	1	1	1
7.61633	-87.7472	1	1	1
7.65799	-88.9501	1	1	1
7.69966	-90.2752	1	1	1
7.74133	-91.6616	1	1	1
7.78299	-93.0785	1	1	1
7.82466	-94.3323	1	1	1
7.86633	-95.79	1	1	1
7.90799	-97.3191	1	1	1
7.94966	-98.7258	1	1	1
7.99133	-100.306	1	1	1
8.03299	-101.794	1	1	1
8.07466	-103.374	1	1	1
8.11633	-105.097	1	1	1
8.15799	-106.606	1	1	1
8.19966	-108.328	1	1	1
8.24133	-110.133	1	1	1
8.28299	-112.018	1	1	1
8.32466	-113.935	1	1	1
8.36633	-115.882	1	1	1
8.40799	-117.768	1	1	1
8.44966	-119.582	1	1	1
8.49133	-121.519	1	1	1
8.53299	-123.456	1	1	1
8.57466	-125.362	1	1	1
8.61633	-127.197	1	1	1
8.65799	-129.062	1	1	1
8.69966	-130.836	1	1	1
8.74133	-132.661	1	1	1
8.78299	-134.557	1	1	1
8.82466	-136.391	1	1	1
8.86633	-138.196	1	1	1
8.90799	-140	1	1	1
8.94966	-141.713	1	1	1
8.99133	-143.415	1	1	1
9.03299	-145.097	1	1	1
9.07466	-146.758	1	1	1
9.11633	-148.318	1	1	1
9.15799	-148.899	1	1	1
9.19966	-151.376	1	1	1
9.24133	-152.854	1	1	1
9.28299	-154.22	1	1	1
9.32466	-155.668	1	1	1
9.36633	-157.023	1	1	1
9.40799	-158.308	1	1	1
9.44966	-159.704	1	1	1
9.49133	-160.968	1	1	1
9.53299	-162.314	1	1	1
9.57466	-163.609	1	1	1
9.61633	-164.883	1	1	1
9.65799	-166.249	1	1	1
9.69966	-167.523	1	1	1
9.74133	-168.807	1	1	1
9.78299	-170.092	1	1	1
9.82466	-171.366	1	1	1
9.86633	-172.681	1	1	1
9.90799	-173.925	1	1	1
9.94966	-175.209	1	1	1
9.99133	-176.453	1	1	1
10.033	-177.717	1	1	1
10.0747	-178.869	1	1	1
10.1163	-180.143	1	1	1
10.158	-181.366	1	1	1
10.1997	-182.61	1	1	1
10.2413	-183.863	1	1	1
10.283	-185.097	1	1	1
10.3247	-186.402	1	1	1
10.3663	-187.696	1	1	1
10.408	-188.93	1	1	1
10.4497	-190.133	1	1	1
10.4913	-191.529	1	1	1
10.533	-192.762	1	1	1
10.5747	-194.016	1	1	1
10.6163	-195.321	1	1	1
10.658	-195.556	1	1	1
10.6997	-197.829	1	1	1
10.7413	-199.123	1	1	1
10.783	-200.438	1	1	1
10.8247	-201.804	1	1	1
10.8663	-203.089	1	1	1
10.908	-204.444	1	1	1
10.9497	-205.607	1	1	1
10.9913	-206.932	1	1	1
11.033	-208.226	1	1	1
11.0747	-209.439	1	1	1
11.1163	-210.775	1	1	1
11.158	-212.151	1	1	1
11.1997	-213.456	1	1	1
11.2413	-214.791	1	1	1
11.283	-215.933	1	1	1
11.3247	-216.86	1	1	1
11.3663	-218.41	1	1	1
11.408	-219.735	1	1	1
11.4497	-220.642	1	1	1
11.4913	-221.549	1	1	1
11.533	-223.527	1	1	1
11.5747	-225.27	1	1	1
11.6163	-226.972	1	1	1
11.658	-228.624	1	1	1
11.6997	-230.285	1	1	1
11.7413	-232.161	1	1	1
11.783	-233.843	1	1	1
11.8247	-235.698	1	1	1
11.8663	-237.554	1	1	1
11.908	-239.368	1	1	1
11.9497	-241.142	1	1	1
11.9913	-242.956	1	1	1
12.033	-245.148	1	1	1
12.0747	-247.238	1	1	1
12.1163	-249.46	1	1	1
12.158	-251.753	1	1	1
12.1997	-254.037	1	1	1
12.2413	-256.412	1	1	1
12.283	-258.247	1	1	1
12.3247	-259.297	1	1	1
12.3663	-263.017	1	1	1
12.408	-266.096	1	1	1
12.4497	-269.093	1	1	1
12.4913	-271.978	1	1	1
12.533	-274.883	1	1	1
12.5747	-278.002	1	1	1
12.6163	-281.182	1	1	1
12.658	-284.669	1	1	1
12.6997	-288.145	1	1	1
12.7413	-289.633	1	1	1
12.783	-294.893	1	1	1
12.8247	-298.736	1	1	1
12.8663	-302.742	1	1	1
12.908	-306.718	1	1	1
12.9497	-310.724	1	1	1
12.9913	-314.822	1	1	1
13.033	-318.481	1	1	1
13.0747	-323.048	1	1	1
13.1163	-327.299	1	1	1
13.158	-331.896	1	1	1
13.1997	-336.544	1	1	1
13.2413	-341.091	1	1	1
13.283	-345.902	1	1	1
13.3247	-351.101	1	1	1
13.3663	-356.473	1	1	1
13.408	-361.509	1	1	1
13.4497	-367.207	1	1	1
13.4913	-373.71	1	1	1
13.533	-380.265	1	1	1
13.5747	-387.023	1	1	1
13.6163	-393.67	1	1	1
13.658	-400.826	1	1	1
13.6997	-408.206	1	1	1
13.7413	-415.861	1	1	1
13.783	-420.153	1	1	1
13.8247	-430.754	1	1	1
13.8663	-439.46	1	1	1
13.908	-447.513	1	1	1
13.9497	-455.545	1	1	1
13.9913	-465.413	1	1	1
14.033	-474.251	1	1	1
14.0747	-483.802	1	1	1
14.1163	-493.496	1	1	1
14.158	-503.578	1	1	1
14.1997	-513.405	1	1	1
14.2413	-524.913	1	1	1
14.283	-534.801	1	1	1
14.3247	-442.905	1	1	1
14.3663	-553.394	1	1	1
14.408	-568.899	1	1	1
14.4497	-584.2	1	1	1
14.4913	-597.859	1	1	1
14.533	-611.825	1	1	1
14.5747	-624.322	1	1	1
14.6163	-640.183	1	1	1
14.658	-656.137	1	1	1
14.6997	-671.978	1	1	1
14.7413	-688.532	1	1	1
14.783	-699.939	1	1	1
14.8247	-719.256	1	1	1
14.8663	-737.339	1	1	1
14.908	-755.464	1	1	1
14.9497	-774.903	1	1	1
14.9913	-797.421	1	1	1
15.033	-819.827	1	1	1
15.0747	-842.487	1	1	1
15.1163	-866.279	1	1	1
15.158	-887.89	1	1	1
15.1997	-914.73	1	1	1
15.2413	-941.162	1	1	1
15.283	-966.728	1	1	1
15.3247	-995.025	1	1	1
15.3663	-1024.28	1	1	1
15.408	-1057.06	1	1	1
15.4497	-1089.25	1	1	1
15.4913	-1124.28	1	1	1
15.533	-1161.09	1	1	1
15.5747	-1183.12	1	1	1
15.6163	-1227.66	1	1	1
15.658	-1267.77	1	1	1
15.6997	-1310.93	1	1	1
15.7483	-1359.91	1	1	1
17.9149	-8970.44	1	1	1
0.453459	0.902008	2	0	100000
1.35007	0.83209	2	0	100000
1.69501	0.808648	2	0	100000
1.92426	0.79377	2	0	100000
2.45508	0.758033	2	0	100000
2.68669	0.74168	2	0	100000
3.34909	0.690451	2	0	100000
3.68694	0.665205	2	0	100000
4.3731	0.617172	2	0	100000
4.87444	0.578811	2	0	100000
5.34846	0.542746	2	0	100000
5.79272	0.512541	2	0	100000
6.44834	0.470369	2	0	100000
7.56943	0.405902	2	0	100000
8.33459	0.362049	2	0	100000
9.31154	0.310287	2	0	100000
9.64391	0.293197	2	0	100000
10.2976	0.259836	2	0	100000
10.654	0.24123	2	0	100000
11.3087	0.209262	2	0	100000
11.6827	0.191066	2	0	100000
12.3021	0.164631	2	0	100000
12.7283	0.148402	2	0	100000
13.367	0.127951	2	0	100000
13.7621	0.117377	2	0	100000
14.3243	0.104344	2	0	100000
16.4478	0.0677459	2	0	100000
17.5693	0.0518852	2	0	100000
18.4593	0.0408607	2	0	100000
18.7167	0.0379508	2	0	100000
19.3634	0.0305738	2	0	100000
20.3608	0.0206967	2	0	100000
22.2135	0.00797105	2	0	100000

## Sheet: tens_interpolation
		Datum / Zeit	Tension unten [hPa]	Tension oben [hPa]
m_bot	b_bot	2013-07-31 15:49:15	0.65	3.59
82.8	-3.43509e+06	2013-07-31 16:09:15	1.8	4.76
m_top	b_top	2013-07-31 15:53:59	0.921717	3.86644
84.24	-3.49483e+06	y = m*x+b
		AE unten [t]	AE oben [t]
		41227.2
			Brutto-Gewicht [g]	Netto-Gewicht [g]
-1.40314	58626.9	2013-08-23 17:58:52	382.99	12.72
		2013-08-24 10:54:53	382	11.73
-1.40314	58256.7	2013-08-24 06:49:00	382.24	11.9696
			AE unten
m_bot	b_bot	2012-12-29 09:40:43	381.95	15.65
-1.67594	69552	2012-12-31 12:22:22	378.41	12.11
m_top	b_top	2012-12-31 06:08:40	378.845	12.5449
-1.67594	69185.7	y = m*x+b
