# Supplementary material for: A pore-size classification for peat bogs derived from unsaturated hydraulic properties
Source: Copernicus journal article supplement (doi:10.5194/hess-21-6185-2017), 2017-12-07
Supplement: Supplementary file 23 [file A331_8_HYDRUS_old.xlsx]

## Sheet: Gewicht
Datum / Zeit	Brutto-Gewicht [g]	Netto-Gewicht [g]	Gewichtsänderung [g]	Zeitintervall	Tage [d]	cum. Verdunstung [cm]	Verdunstungsrate [cm/d]	Theta [-]	Gewichtsabnahme Probe [g]	Abnahme rate [g]	Verdunstung [cm]	Volumen	244
												Höhe	5
2012-12-09 01:01:10	606.935	240.635	240.635	0	0		#DIV/0!	0.942768				A	48.8
2012-12-09 11:54:08	596.99	230.69	-16.32	0.453459	0.453459	0.203799	0.449432	0.902008	-16.32			Theta0	0.942768
2012-12-10 09:25:16	579.93	213.63	-33.38	#REF!	1.35007	0.34959	#REF!	0.87285	-33.38	#REF!	0.34959	Trockengewicht	10.6
2012-12-10 17:41:58	574.21	207.91	-39.1	0.344934	1.69501	0.117213	0.339813	0.919325	-39.1	5.72	0.117213	Ks (as in Ksat)
2012-12-10 23:12:06	570.58	204.28	-42.73	0.229257	1.92426	0.0743852	0.324462	0.927891	-42.73	3.63	0.0743852			Korrektur-Faktoren
2012-12-11 11:56:28	561.86	195.56	-51.45	0.530813	2.45508	0.178689	0.336632	0.90703	-51.45	8.72	0.178689		12.26	Trockengewicht
2012-12-11 17:29:59	557.87	191.57	-55.44	0.231611	2.68669	0.0817623	0.353015	0.926416	-55.44	3.99	0.0817623			Handschuh
2012-12-12 09:23:51	545.37	179.07	-67.94	0.662406	3.34909	0.256148	0.386693	0.891538	-67.94	12.5	0.256148
2012-12-12 17:30:21	539.21	172.91	-74.1	0.337842	3.68694	0.12623	0.373635	0.917522	-74.1	6.16	0.12623
2012-12-13 09:58:25	527.49	161.19	-85.82	0.686163	4.3731	0.240164	0.35001	0.894735	-85.82	11.72	0.240164
2012-12-13 22:00:21	518.13	151.83	-95.18	0.501339	4.87444	0.191803	0.382582	0.904407	-95.18	9.36	0.191803
2012-12-14 09:22:57	509.33	143.03	-103.98	0.474024	5.34846	0.180328	0.380419	0.906702	-103.98	8.8	0.180328
2012-12-14 20:02:41	501.96	135.66	-111.35	0.44426	5.79272	0.151025	0.339947	0.912563	-111.35	7.37	0.151025
2012-12-15 11:46:46	491.67	125.37	-121.64	0.655623	6.44834	0.210861	0.321619	0.900596	-121.64	10.29	0.210861
2012-12-16 14:41:08	475.94	109.64	-137.37	1.12108	7.56943	0.322336	0.287522	0.878301	-137.37	15.73	0.322336
2012-12-17 09:02:58	465.24	98.94	-148.07	0.765164	8.33459	0.219262	0.286556	0.898916	-148.07	10.7	0.219262
2012-12-18 08:29:46	452.61	86.31	-160.7	0.976947	9.31154	0.258811	0.264919	0.891006	-160.7	12.63	0.258811
2012-12-18 16:28:23	448.44	82.14	-164.87	0.332373	9.64391	0.0854508	0.257093	0.925678	-164.87	4.17	0.0854508
2012-12-19 08:09:44	440.3	74	-173.01	0.653713	10.2976	0.166803	0.255163	0.909407	-173.01	8.14	0.166803
2012-12-19 16:42:53	435.76	69.46	-177.55	0.356355	10.654	0.0930328	0.261067	0.924161	-177.55	4.54	0.0930328
2012-12-20 08:25:37	427.96	61.66	-185.35	0.654675	11.3087	0.159836	0.244146	0.910801	-185.35	7.8	0.159836
2012-12-20 17:24:13	423.52	57.22	-189.79	0.374027	11.6827	0.0909836	0.243254	0.924571	-189.79	4.44	0.0909836
2012-12-21 08:16:09	417.07	50.77	-196.24	0.619394	12.3021	0.132172	0.213389	0.916334	-196.24	6.45	0.132172
2012-12-21 18:29:53	413.11	46.81	-200.2	0.426204	12.7283	0.0811475	0.190396	0.926538	-200.2	3.96	0.0811475
2012-12-22 09:49:38	408.12	41.82	-205.19	0.638714	13.367	0.102254	0.160094	0.922317	-205.19	4.99	0.102254
2012-12-22 19:18:35	405.54	39.24	-207.77	0.395107	13.7621	0.0528689	0.133809	0.932194	-207.77	2.58	0.0528689
2012-12-23 08:48:07	402.36	36.06	-210.95	0.562171	14.3243	0.0651639	0.115915	0.929735	-210.95	3.18	0.0651639
2012-12-25 11:46:01	393.43	27.13	-219.88	2.12355	16.4478	0.182992	0.0861725	0.90617	-219.88	8.93	0.182992
2012-12-26 14:41:01	389.56	23.26	-223.75	1.12153	17.5693	0.0793033	0.0707102	0.926907	-223.75	3.87	0.0793033
2012-12-27 12:02:32	386.87	20.57	-226.44	0.889936	18.4593	0.055123	0.0619404	0.931743	-226.44	2.69	0.055123
2012-12-27 18:13:11	386.16	19.86	-227.15	0.257397	18.7167	0.0145492	0.0565244	0.939858	-227.15	0.71	0.0145492
2012-12-28 09:44:31	384.36	18.06	-228.95	0.646761	19.3634	0.0368852	0.0570307	0.935391	-228.95	1.8	0.0368852
2012-12-29 09:40:43	381.95	15.65	-231.36	0.997367	20.3608	0.0493852	0.0495156	0.932891	-231.36	2.41	0.0493852
2012-12-31 12:22:22	378.41	12.11	-234.9	2.11225	22.4731	0.072541	0.034343	0.92826	-234.9	3.54	0.072541

## Sheet: Evap_Theta
Zeit	cum. Verdunstung [cm]	Verdunstungsrate [cm/d]	Theta [-]
0.453459	0.203799	0.449432	0.921149
0.782434	0.134016	0.407376	0.935105
1.64072	0.34959	0.251167	0.898975
1.98566	0.466803	0.339813	0.875533
2.21491	0.541189	0.324462	0.860656
2.74573	0.719877	0.336632	0.824918
2.97734	0.801639	0.353015	0.808566
3.63974	1.05779	0.386693	0.757336
3.97759	1.18402	0.373635	0.73209
4.66375	1.42418	0.35001	0.684057
5.16509	1.61598	0.382582	0.645697
5.63911	1.79631	0.380419	0.609631
6.08337	1.94734	0.339947	0.579426
6.73899	2.1582	0.321619	0.537254
7.86008	2.48053	0.287522	0.472787
8.62524	2.6998	0.286556	0.428934
9.60219	2.95861	0.264919	0.377172
9.93456	3.04406	0.257093	0.360082
10.5883	3.21086	0.255163	0.326721
10.9446	3.30389	0.261067	0.308115
11.5993	3.46373	0.244146	0.276148
11.9733	3.55471	0.243254	0.257951
12.5927	3.68689	0.213389	0.231516
13.0189	3.76803	0.190396	0.215287
13.6576	3.87029	0.160094	0.194836
14.0527	3.92316	0.133809	0.184262
14.6149	3.98832	0.115915	0.17123
16.7385	4.17131	0.0861725	0.134631
17.86	4.25061	0.0707102	0.11877
18.7499	4.30574	0.0619404	0.107746
19.0073	4.32029	0.0565244	0.104836
19.6541	4.35717	0.0570307	0.097459
20.6515	4.40656	0.0495156	0.087582
22.7637	4.4791	0.034343	0.0730738

## Sheet: Tensionen
Datum / Zeit	Tension unten [hPa]	Tension oben [hPa]	Datum / Zeit	Zeit [d]	s	Zeit [d]	MP bot(2) [cm]	MP top(1) [cm]		Versuchsbeginn
2012-12-08 17:51:08	1.77	4.17	41210.7	-0.298631		-0.298631	-1.80428	-4.25076		2012-12-09 01:01:10
2012-12-08 17:52:08	1.82	4.21	41251.7	-0.297937		-0.297937	-1.85525	-4.29154
2012-12-08 17:53:08	1.83	4.22	41251.7	-0.297242		-0.297242	-1.86544	-4.30173
2012-12-08 17:54:08	1.86	4.24	41251.7	-0.296548		-0.296548	-1.89602	-4.32212
2012-12-08 17:55:08	1.9	4.29	41251.7	-0.295853		-0.295853	-1.9368	-4.37309
2012-12-08 17:56:08	1.94	4.32	41251.7	-0.295159		-0.295159	-1.97757	-4.40367
2012-12-08 17:57:08	1.97	4.36	41251.7	-0.294464		-0.294464	-2.00815	-4.44444
2012-12-08 17:58:08	2.01	4.39	41251.7	-0.29377		-0.29377	-2.04893	-4.47503
2012-12-08 17:59:08	2.05	4.43	41251.7	-0.293075		-0.293075	-2.0897	-4.5158
2012-12-08 18:00:08	2.09	4.46	41251.8	-0.292381		-0.292381	-2.13048	-4.54638
2012-12-08 18:01:08	2.11	4.48	41251.8	-0.291687		-0.291687	-2.15087	-4.56677
2012-12-08 18:03:08	2.43	5.01	41251.8	-0.290298		-0.290298	-2.47706	-5.10703
2012-12-08 18:04:08	1.88	4.34	41251.8	-0.289603		-0.289603	-1.91641	-4.42406
2012-12-08 18:05:08	1.82	4.28	41251.8	-0.288909		-0.288909	-1.85525	-4.3629
2012-12-08 18:06:08	1.87	4.3	41251.8	-0.288214		-0.288214	-1.90622	-4.38328
2012-12-08 18:07:08	1.97	4.4	41251.8	-0.28752		-0.28752	-2.00815	-4.48522
2012-12-08 18:08:08	2.01	4.44	41251.8	-0.286825		-0.286825	-2.04893	-4.52599
2012-12-08 18:09:08	2.03	4.47	41251.8	-0.286131		-0.286131	-2.06932	-4.55657
2012-12-08 18:10:08	2.06	4.5	41251.8	-0.285437		-0.285437	-2.0999	-4.58716
2012-12-08 18:11:08	2.09	4.53	41251.8	-0.284742		-0.284742	-2.13048	-4.61774
2012-12-08 18:12:08	2.12	4.54	41251.8	-0.284048		-0.284048	-2.16106	-4.62793
2012-12-08 18:13:08	2.13	4.56	41251.8	-0.283353		-0.283353	-2.17125	-4.64832
2012-12-08 18:14:08	2.17	4.61	41251.8	-0.282659		-0.282659	-2.21203	-4.69929
2012-12-08 18:15:08	2.21	4.63	41251.8	-0.281964		-0.281964	-2.2528	-4.71967
2012-12-08 18:16:08	2.25	4.68	41251.8	-0.28127		-0.28127	-2.29358	-4.77064
2012-12-08 18:17:08	2.29	4.7	41251.8	-0.280575		-0.280575	-2.33435	-4.79103
2012-12-08 18:18:08	2.32	4.73	41251.8	-0.279881		-0.279881	-2.36493	-4.82161
2012-12-08 18:19:08	2.34	4.75	41251.8	-0.279187		-0.279187	-2.38532	-4.842
2012-12-08 18:20:08	2.37	4.78	41251.8	-0.278492		-0.278492	-2.4159	-4.87258
2012-12-08 18:21:08	2.41	4.82	41251.8	-0.277798		-0.277798	-2.45668	-4.91335
2012-12-08 18:22:08	2.45	4.85	41251.8	-0.277103		-0.277103	-2.49745	-4.94393
2012-12-08 18:23:08	2.48	4.88	41251.8	-0.276409		-0.276409	-2.52803	-4.97452
2012-12-08 18:24:08	2.49	4.91	41251.8	-0.275714		-0.275714	-2.53823	-5.0051
2012-12-08 18:25:08	2.54	4.94	41251.8	-0.27502		-0.27502	-2.58919	-5.03568
2012-12-08 18:26:08	2.57	4.96	41251.8	-0.274325		-0.274325	-2.61978	-5.05607
2012-12-08 18:27:08	2.59	5	41251.8	-0.273631		-0.273631	-2.64016	-5.09684
2012-12-08 18:28:08	2.61	5.02	41251.8	-0.272937		-0.272937	-2.66055	-5.11723
2012-12-08 18:29:08	2.64	5.05	41251.8	-0.272242		-0.272242	-2.69113	-5.14781
2012-12-08 18:30:08	2.68	5.09	41251.8	-0.271548		-0.271548	-2.73191	-5.18858
2012-12-08 18:31:08	2.71	5.12	41251.8	-0.270853		-0.270853	-2.76249	-5.21916
2012-12-08 18:32:08	2.74	5.15	41251.8	-0.270159		-0.270159	-2.79307	-5.24975
2012-12-08 18:33:08	2.78	5.17	41251.8	-0.269464		-0.269464	-2.83384	-5.27013
2012-12-08 18:34:08	2.79	5.2	41251.8	-0.26877		-0.26877	-2.84404	-5.30071
2012-12-08 18:35:08	2.83	5.23	41251.8	-0.268075		-0.268075	-2.88481	-5.33129
2012-12-08 18:36:08	2.85	5.24	41251.8	-0.267381		-0.267381	-2.9052	-5.34149
2012-12-08 18:37:08	2.87	5.28	41251.8	-0.266687		-0.266687	-2.92559	-5.38226
2012-12-08 18:38:08	2.91	5.31	41251.8	-0.265992		-0.265992	-2.96636	-5.41284
2012-12-08 18:39:08	2.94	5.35	41251.8	-0.265298		-0.265298	-2.99694	-5.45362
2012-12-08 18:40:08	2.98	5.38	41251.8	-0.264603		-0.264603	-3.03772	-5.4842
2012-12-08 18:41:08	3.01	5.4	41251.8	-0.263909		-0.263909	-3.0683	-5.50459
2012-12-08 18:42:08	3.02	5.43	41251.8	-0.263214		-0.263214	-3.07849	-5.53517
2012-12-08 18:43:08	3.06	5.46	41251.8	-0.26252		-0.26252	-3.11927	-5.56575
2012-12-08 18:44:08	3.1	5.49	41251.8	-0.261825		-0.261825	-3.16004	-5.59633
2012-12-08 18:45:08	3.12	5.52	41251.8	-0.261131		-0.261131	-3.18043	-5.62691
2012-12-08 18:46:08	3.14	5.54	41251.8	-0.260437		-0.260437	-3.20082	-5.6473
2012-12-08 18:47:08	3.18	5.57	41251.8	-0.259742		-0.259742	-3.24159	-5.67788
2012-12-08 18:48:08	3.21	5.61	41251.8	-0.259048		-0.259048	-3.27217	-5.71865
2012-12-08 18:49:08	3.23	5.64	41251.8	-0.258353		-0.258353	-3.29256	-5.74924
2012-12-08 18:50:08	3.26	5.66	41251.8	-0.257659		-0.257659	-3.32314	-5.76962
2012-12-08 18:51:08	3.28	5.69	41251.8	-0.256964		-0.256964	-3.34353	-5.8002
2012-12-08 19:01:08	3.56	5.96	41251.8	-0.25002		-0.25002	-3.62895	-6.07543
2012-12-08 19:11:08	3.82	6.24	41251.8	-0.243075		-0.243075	-3.89399	-6.36086
2012-12-08 19:21:08	4.08	6.49	41251.8	-0.236131		-0.236131	-4.15902	-6.6157
2012-12-08 19:31:08	4.3	6.72	41251.8	-0.229187		-0.229187	-4.38328	-6.85015
2012-12-08 19:41:08	4.55	6.97	41251.8	-0.222242		-0.222242	-4.63812	-7.10499
2012-12-08 19:51:08	2.7	5.14	41251.8	-0.215298		-0.215298	-2.75229	-5.23955
2012-12-08 20:01:08	2.16	4.6	41251.8	-0.208353		-0.208353	-2.20183	-4.68909
2012-12-08 20:11:08	2.04	4.46	41251.8	-0.201409		-0.201409	-2.07951	-4.54638
2012-12-08 20:21:08	1.99	4.42	41251.8	-0.194464		-0.194464	-2.02854	-4.50561
2012-12-08 20:31:08	2.01	4.45	41251.9	-0.18752		-0.18752	-2.04893	-4.53619
2012-12-08 20:41:08	2.03	4.48	41251.9	-0.180575		-0.180575	-2.06932	-4.56677
2012-12-08 20:51:08	2.05	4.5	41251.9	-0.173631		-0.173631	-2.0897	-4.58716
2012-12-08 21:01:08	2.08	4.53	41251.9	-0.166687		-0.166687	-2.12029	-4.61774
2012-12-08 21:11:08	2.14	4.58	41251.9	-0.159742		-0.159742	-2.18145	-4.66871
2012-12-08 21:21:08	2.15	4.6	41251.9	-0.152798		-0.152798	-2.19164	-4.68909
2012-12-08 21:31:08	2.2	4.65	41251.9	-0.145853		-0.145853	-2.24261	-4.74006
2012-12-08 21:41:08	2.22	4.68	41251.9	-0.138909		-0.138909	-2.263	-4.77064
2012-12-08 21:51:08	2.26	4.72	41251.9	-0.131964		-0.131964	-2.30377	-4.81142
2012-12-08 22:01:08	2.31	4.77	41251.9	-0.12502		-0.12502	-2.35474	-4.86239
2012-12-08 22:11:08	2.38	4.84	41251.9	-0.118075		-0.118075	-2.4261	-4.93374
2012-12-08 22:21:08	2.46	4.91	41251.9	-0.111131		-0.111131	-2.50765	-5.0051
2012-12-08 22:31:08	2.54	5	41251.9	-0.104187		-0.104187	-2.58919	-5.09684
2012-12-08 22:41:08	2.63	5.08	41251.9	-0.0972421		-0.0972421	-2.68094	-5.17839
2012-12-08 22:51:08	2.69	5.17	41252	-0.0902977		-0.0902977	-2.7421	-5.27013
2012-12-08 23:01:08	2.77	5.25	41252	-0.0833532		-0.0833532	-2.82365	-5.35168
2012-12-08 23:11:08	2.88	5.32	41252	-0.0764088		-0.0764088	-2.93578	-5.42304
2012-12-08 23:21:08	2.94	5.42	41252	-0.0694643		-0.0694643	-2.99694	-5.52497
2012-12-08 23:31:08	3.09	5.55	41252	-0.0625199		-0.0625199	-3.14985	-5.65749
2012-12-08 23:41:08	3.15	5.63	41252	-0.0555754		-0.0555754	-3.21101	-5.73904
2012-12-08 23:51:08	3.26	5.74	41252	-0.048631		-0.048631	-3.32314	-5.85117
2012-12-09 00:01:08	3.38	5.86	41252	-0.0416866		-0.0416866	-3.44546	-5.9735
2012-12-09 00:11:08	3.5	5.99	41252	-0.0347421		-0.0347421	-3.56779	-6.10601
2012-12-09 00:21:08	3.57	6.05	41252	-0.0277977		-0.0277977	-3.63914	-6.16718
2012-12-09 00:31:08	3.58	6.07	41252	-0.0208532		-0.0208532	-3.64934	-6.18756
2012-12-09 00:41:08	3.37	5.84	41252	-0.0139088		-0.0139088	-3.43527	-5.95311
2012-12-09 00:51:08	3.28	5.77	41252	-0.00696434		-0.00696434	-3.34353	-5.88175
2012-12-09 01:01:08	3.4	5.88	41252	-1.98929e-05		-1.98929e-05	-3.46585	-5.99388
2012-12-09 01:11:08	3.57	6.05	41252	0.00692455	41252	0.00692455	-3.63914	-6.16718
2012-12-09 01:21:08	3.72	6.21	41252.1	0.013869		0.013869	-3.79205	-6.33028
2012-12-09 01:31:08	3.87	6.37	41252.1	0.0208134		0.0208134	-3.94495	-6.49337
2012-12-09 01:41:08	4.04	6.53	41252.1	0.0277579		0.0277579	-4.11825	-6.65647
2012-12-09 01:51:08	4.22	6.71	41252.1	0.0347023		0.0347023	-4.30173	-6.83996
2012-12-09 02:01:08	4.35	6.84	41252.1	0.0416468		0.0416468	-4.43425	-6.97248
2012-12-09 02:11:08	4.51	7	41252.1	0.0485912		0.0485912	-4.59735	-7.13558
2012-12-09 02:21:08	4.69	7.19	41252.1	0.0555357	41252.1	0.0555357	-4.78084	-7.32926
2012-12-09 02:31:08	4.88	7.37	41252.1	0.0624801		0.0624801	-4.97452	-7.51274
2012-12-09 02:41:08	5.04	7.53	41252.1	0.0694246		0.0694246	-5.13761	-7.67584
2012-12-09 02:51:08	5.22	7.7	41252.1	0.076369		0.076369	-5.3211	-7.84913
2012-12-09 03:01:08	5.27	7.77	41252.1	0.0833134		0.0833134	-5.37207	-7.92049
2012-12-09 03:11:08	5.4	7.88	41252.1	0.0902579		0.0902579	-5.50459	-8.03262
2012-12-09 03:21:08	5.5	7.99	41252.1	0.0972023	41252.1	0.0972023	-5.60652	-8.14475
2012-12-09 03:31:08	5.46	7.94	41252.1	0.104147		0.104147	-5.56575	-8.09378
2012-12-09 03:41:08	5.61	8.09	41252.2	0.111091		0.111091	-5.71865	-8.24669
2012-12-09 03:51:08	5.78	8.26	41252.2	0.118036		0.118036	-5.89195	-8.41998
2012-12-09 04:01:08	5.94	8.42	41252.2	0.12498		0.12498	-6.05505	-8.58308
2012-12-09 04:11:08	6.07	8.57	41252.2	0.131925		0.131925	-6.18756	-8.73598
2012-12-09 04:21:08	6.21	8.71	41252.2	0.138869	41252.2	0.138869	-6.33028	-8.8787
2012-12-09 04:31:08	6.35	8.85	41252.2	0.145813		0.145813	-6.47299	-9.02141
2012-12-09 04:41:08	6.48	8.97	41252.2	0.152758		0.152758	-6.6055	-9.14373
2012-12-09 04:51:08	6.62	9.12	41252.2	0.159702		0.159702	-6.74822	-9.29664
2012-12-09 05:01:08	6.75	9.23	41252.2	0.166647		0.166647	-6.88073	-9.40877
2012-12-09 05:11:08	6.81	9.32	41252.2	0.173591		0.173591	-6.9419	-9.50051
2012-12-09 05:21:08	6.89	9.38	41252.2	0.180536	41252.2	0.180536	-7.02345	-9.56167
2012-12-09 05:31:08	6.64	9.13	41252.2	0.18748		0.18748	-6.7686	-9.30683
2012-12-09 05:41:08	6.83	9.33	41252.2	0.194425		0.194425	-6.96228	-9.5107
2012-12-09 05:51:08	7	9.49	41252.2	0.201369		0.201369	-7.13558	-9.6738
2012-12-09 06:01:08	7.15	9.64	41252.3	0.208313		0.208313	-7.28848	-9.82671
2012-12-09 06:11:08	7.31	9.78	41252.3	0.215258		0.215258	-7.45158	-9.96942
2012-12-09 06:21:08	7.35	9.85	41252.3	0.222202	41252.3	0.222202	-7.49235	-10.0408
2012-12-09 06:31:08	7.46	9.96	41252.3	0.229147		0.229147	-7.60449	-10.1529
2012-12-09 06:41:08	7.21	9.69	41252.3	0.236091		0.236091	-7.34964	-9.87768
2012-12-09 06:51:08	7.46	9.94	41252.3	0.243036		0.243036	-7.60449	-10.1325
2012-12-09 07:01:08	7.59	10.07	41252.3	0.24998		0.24998	-7.737	-10.265
2012-12-09 07:11:08	7.72	10.21	41252.3	0.256925		0.256925	-7.86952	-10.4077
2012-12-09 07:21:08	7.82	10.3	41252.3	0.263869	41252.3	0.263869	-7.97146	-10.4995
2012-12-09 07:31:08	7.93	10.41	41252.3	0.270813		0.270813	-8.08359	-10.6116
2012-12-09 07:41:08	8.02	10.51	41252.3	0.277758		0.277758	-8.17533	-10.7136
2012-12-09 07:51:08	8.13	10.6	41252.3	0.284702		0.284702	-8.28746	-10.8053
2012-12-09 08:01:08	8.26	10.72	41252.3	0.291647		0.291647	-8.41998	-10.9276
2012-12-09 08:11:08	8.37	10.87	41252.3	0.298591		0.298591	-8.53211	-11.0805
2012-12-09 08:21:08	8.48	10.96	41252.3	0.305536	41252.3	0.305536	-8.64424	-11.1723
2012-12-09 08:31:08	8.6	11.06	41252.4	0.31248		0.31248	-8.76656	-11.2742
2012-12-09 08:41:08	8.7	11.18	41252.4	0.319425		0.319425	-8.8685	-11.3965
2012-12-09 08:51:08	8.81	11.28	41252.4	0.326369		0.326369	-8.98063	-11.4985
2012-12-09 09:01:08	8.88	11.35	41252.4	0.333313		0.333313	-9.05199	-11.5698
2012-12-09 09:11:08	9.01	11.47	41252.4	0.340258		0.340258	-9.18451	-11.6922
2012-12-09 09:21:08	9.1	11.57	41252.4	0.347202	41252.4	0.347202	-9.27625	-11.7941
2012-12-09 09:31:08	9.18	11.64	41252.4	0.354147		0.354147	-9.3578	-11.8654
2012-12-09 09:41:08	9.29	11.76	41252.4	0.361091		0.361091	-9.46993	-11.9878
2012-12-09 09:51:08	9.41	11.87	41252.4	0.368036		0.368036	-9.59225	-12.0999
2012-12-09 10:01:08	9.48	11.94	41252.4	0.37498		0.37498	-9.66361	-12.1713
2012-12-09 10:11:08	9.56	12.02	41252.4	0.381925		0.381925	-9.74516	-12.2528
2012-12-09 10:21:08	9.66	12.13	41252.4	0.388869	41252.4	0.388869	-9.84709	-12.3649
2012-12-09 10:31:08	9.75	12.2	41252.4	0.395813		0.395813	-9.93884	-12.4363
2012-12-09 10:41:08	9.81	12.28	41252.4	0.402758		0.402758	-10	-12.5178
2012-12-09 10:51:08	9.91	12.38	41252.5	0.409702		0.409702	-10.1019	-12.6198
2012-12-09 11:01:08	9.97	12.45	41252.5	0.416647		0.416647	-10.1631	-12.6911
2012-12-09 11:11:08	10.05	12.54	41252.5	0.423591		0.423591	-10.2446	-12.7829
2012-12-09 11:21:08	10.1	12.56	41252.5	0.430536	41252.5	0.430536	-10.2956	-12.8033
2012-12-09 11:31:08	10.22	12.68	41252.5	0.43748		0.43748	-10.4179	-12.9256
2012-12-09 11:41:08	10.24	12.71	41252.5	0.444425		0.444425	-10.4383	-12.9562
2012-12-09 11:51:08	10.3	12.8	41252.5	0.451369		0.451369	-10.4995	-13.0479
2012-12-09 12:01:08	9.75	12.21	41252.5	0.458313		0.458313	-9.93884	-12.4465
2012-12-09 12:11:08	10	12.45	41252.5	0.465258		0.465258	-10.1937	-12.6911
2012-12-09 12:21:08	10.18	12.64	41252.5	0.472202	41252.5	0.472202	-10.3772	-12.8848
2012-12-09 12:31:08	10.34	12.81	41252.5	0.479147		0.479147	-10.5403	-13.0581
2012-12-09 12:41:08	10.43	12.89	41252.5	0.486091		0.486091	-10.632	-13.1397
2012-12-09 12:51:08	10.49	12.95	41252.5	0.493036		0.493036	-10.6932	-13.2008
2012-12-09 13:01:08	10.62	13.07	41252.5	0.49998		0.49998	-10.8257	-13.3231
2012-12-09 13:21:08	10.75	13.2	41252.6	0.513869		0.513869	-10.9582	-13.4557
2012-12-09 13:31:08	10.82	13.28	41252.6	0.520813	41252.6	0.520813	-11.0296	-13.5372
2012-12-09 13:41:08	10.91	13.37	41252.6	0.527758		0.527758	-11.1213	-13.629
2012-12-09 13:51:08	11	13.45	41252.6	0.534702		0.534702	-11.213	-13.7105
2012-12-09 14:01:08	11.08	13.54	41252.6	0.541647		0.541647	-11.2946	-13.8022
2012-12-09 14:11:08	11.18	13.63	41252.6	0.548591		0.548591	-11.3965	-13.894
2012-12-09 14:21:08	11.24	13.67	41252.6	0.555536		0.555536	-11.4577	-13.9348
2012-12-09 14:31:08	11.24	13.72	41252.6	0.56248	41252.6	0.56248	-11.4577	-13.9857
2012-12-09 14:41:08	11.37	13.82	41252.6	0.569425		0.569425	-11.5902	-14.0877
2012-12-09 14:51:08	11.45	13.89	41252.6	0.576369		0.576369	-11.6718	-14.159
2012-12-09 15:01:08	11.49	13.95	41252.6	0.583313		0.583313	-11.7125	-14.2202
2012-12-09 15:11:08	11.59	14.03	41252.6	0.590258		0.590258	-11.8145	-14.3017
2012-12-09 15:21:08	11.62	14.06	41252.6	0.597202		0.597202	-11.8451	-14.3323
2012-12-09 15:31:08	11.69	14.14	41252.6	0.604147	41252.6	0.604147	-11.9164	-14.4139
2012-12-09 15:41:08	11.78	14.23	41252.7	0.611091		0.611091	-12.0082	-14.5056
2012-12-09 15:51:08	11.86	14.31	41252.7	0.618036		0.618036	-12.0897	-14.5872
2012-12-09 16:21:08	12.04	14.49	41252.7	0.638869		0.638869	-12.2732	-14.7706
2012-12-09 16:41:08	12.2	14.66	41252.7	0.652758	41252.7	0.652758	-12.4363	-14.9439
2012-12-09 16:51:08	11.43	13.94	41252.7	0.659702		0.659702	-11.6514	-14.21
2012-12-09 17:01:08	11.16	13.64	41252.7	0.666647		0.666647	-11.3761	-13.9042
2012-12-09 17:11:08	11.47	13.94	41252.7	0.673591		0.673591	-11.6922	-14.21
2012-12-09 17:21:08	11.73	14.2	41252.7	0.680536		0.680536	-11.9572	-14.475
2012-12-09 17:31:08	12	14.44	41252.7	0.68748		0.68748	-12.2324	-14.7197
2012-12-09 17:51:08	12.26	14.71	41252.7	0.701369	41252.7	0.701369	-12.4975	-14.9949
2012-12-09 18:01:08	12.38	14.82	41252.8	0.708313		0.708313	-12.6198	-15.107
2012-12-09 18:11:08	12.37	14.8	41252.8	0.715258		0.715258	-12.6096	-15.0866
2012-12-09 18:21:08	12.44	14.88	41252.8	0.722202		0.722202	-12.6809	-15.1682
2012-12-09 18:31:08	12.54	14.98	41252.8	0.729147		0.729147	-12.7829	-15.2701
2012-12-09 18:41:08	12.66	15.09	41252.8	0.736091		0.736091	-12.9052	-15.3823
2012-12-09 18:51:08	12.68	15.11	41252.8	0.743036	41252.8	0.743036	-12.9256	-15.4027
2012-12-09 19:01:08	12.82	15.24	41252.8	0.74998		0.74998	-13.0683	-15.5352
2012-12-09 19:11:08	12.9	15.34	41252.8	0.756925		0.756925	-13.1498	-15.6371
2012-12-09 19:21:08	12.96	15.39	41252.8	0.763869		0.763869	-13.211	-15.6881
2012-12-09 19:31:08	13.04	15.47	41252.8	0.770813		0.770813	-13.2926	-15.7696
2012-12-09 19:41:08	13.11	15.54	41252.8	0.777758		0.777758	-13.3639	-15.841
2012-12-09 19:51:08	12.89	15.34	41252.8	0.784702	41252.8	0.784702	-13.1397	-15.6371
2012-12-09 20:01:08	13.18	15.63	41252.8	0.791647		0.791647	-13.4353	-15.9327
2012-12-09 20:11:08	13.32	15.77	41252.8	0.798591		0.798591	-13.578	-16.0754
2012-12-09 20:21:08	13.25	15.69	41252.8	0.805536		0.805536	-13.5066	-15.9939
2012-12-09 20:31:08	13.37	15.8	41252.9	0.81248		0.81248	-13.629	-16.106
2012-12-09 20:41:08	13.45	15.87	41252.9	0.819425		0.819425	-13.7105	-16.1774
2012-12-09 20:51:08	13.53	15.96	41252.9	0.826369	41252.9	0.826369	-13.792	-16.2691
2012-12-09 21:01:08	13.6	16.01	41252.9	0.833313		0.833313	-13.8634	-16.3201
2012-12-09 21:11:08	13.65	16.08	41252.9	0.840258		0.840258	-13.9144	-16.3914
2012-12-09 21:21:08	13.75	16.17	41252.9	0.847202		0.847202	-14.0163	-16.4832
2012-12-09 21:31:08	13.83	16.27	41252.9	0.854147		0.854147	-14.0979	-16.5851
2012-12-09 21:41:08	13.89	16.32	41252.9	0.861091		0.861091	-14.159	-16.6361
2012-12-09 21:51:08	13.97	16.38	41252.9	0.868036	41252.9	0.868036	-14.2406	-16.6972
2012-12-09 22:01:08	13.99	16.42	41252.9	0.87498		0.87498	-14.261	-16.738
2012-12-09 22:11:08	14.06	16.5	41252.9	0.881925		0.881925	-14.3323	-16.8196
2012-12-09 22:21:08	14.13	16.56	41252.9	0.888869		0.888869	-14.4037	-16.8807
2012-12-09 22:31:08	14.21	16.63	41252.9	0.895813		0.895813	-14.4852	-16.9521
2012-12-09 22:41:08	14.24	16.67	41252.9	0.902758		0.902758	-14.5158	-16.9929
2012-12-09 22:51:08	14.25	16.68	41253	0.909702	41253	0.909702	-14.526	-17.0031
2012-12-09 23:01:08	14.34	16.77	41253	0.916647		0.916647	-14.6177	-17.0948
2012-12-09 23:11:08	14.42	16.85	41253	0.923591		0.923591	-14.6993	-17.1764
2012-12-09 23:21:08	14.49	16.92	41253	0.930536		0.930536	-14.7706	-17.2477
2012-12-09 23:31:08	14.53	16.94	41253	0.93748		0.93748	-14.8114	-17.2681
2012-12-09 23:41:08	14.58	17.02	41253	0.944425		0.944425	-14.8624	-17.3496
2012-12-09 23:51:08	14.65	17.08	41253	0.951369	41253	0.951369	-14.9337	-17.4108
2012-12-10 00:01:08	14.68	17.11	41253	0.958313		0.958313	-14.9643	-17.4414
2012-12-10 00:11:08	14.7	17.12	41253	0.965258		0.965258	-14.9847	-17.4516
2012-12-10 00:21:08	14.78	17.2	41253	0.972202		0.972202	-15.0663	-17.5331
2012-12-10 00:31:08	14.64	17.07	41253	0.979147		0.979147	-14.9235	-17.4006
2012-12-10 00:41:08	14.71	17.14	41253	0.986091		0.986091	-14.9949	-17.472
2012-12-10 00:51:08	14.85	17.28	41253	0.993036	41253	0.993036	-15.1376	-17.6147
2012-12-10 01:01:08	14.92	17.35	41253	0.99998		0.99998	-15.209	-17.686
2012-12-10 01:11:08	14.99	17.43	41253	1.00692		1.00692	-15.2803	-17.7676
2012-12-10 01:21:08	15	17.43	41253.1	1.01387		1.01387	-15.2905	-17.7676
2012-12-10 01:31:08	15.04	17.45	41253.1	1.02081		1.02081	-15.3313	-17.788
2012-12-10 01:41:08	15.04	17.47	41253.1	1.02776		1.02776	-15.3313	-17.8084
2012-12-10 01:51:08	15.11	17.55	41253.1	1.0347	41253.1	1.0347	-15.4027	-17.8899
2012-12-10 02:01:08	15.17	17.61	41253.1	1.04165		1.04165	-15.4638	-17.9511
2012-12-10 02:11:08	15.26	17.68	41253.1	1.04859		1.04859	-15.5556	-18.0224
2012-12-10 02:21:08	15.1	17.52	41253.1	1.05554		1.05554	-15.3925	-17.8593
2012-12-10 02:31:08	15.28	17.7	41253.1	1.06248		1.06248	-15.5759	-18.0428
2012-12-10 02:41:08	15.34	17.76	41253.1	1.06942		1.06942	-15.6371	-18.104
2012-12-10 02:51:08	15.39	17.82	41253.1	1.07637	41253.1	1.07637	-15.6881	-18.1651
2012-12-10 03:01:08	15.45	17.88	41253.1	1.08331		1.08331	-15.7492	-18.2263
2012-12-10 03:11:08	15.48	17.92	41253.1	1.09026		1.09026	-15.7798	-18.2671
2012-12-10 03:21:08	15.52	17.95	41253.1	1.0972		1.0972	-15.8206	-18.2977
2012-12-10 03:31:08	15.59	18.02	41253.1	1.10415		1.10415	-15.8919	-18.369
2012-12-10 03:41:08	15.64	18.07	41253.2	1.11109		1.11109	-15.9429	-18.42
2012-12-10 03:51:08	15.39	17.82	41253.2	1.11804	41253.2	1.11804	-15.6881	-18.1651
2012-12-10 04:01:08	15.59	18.01	41253.2	1.12498		1.12498	-15.8919	-18.3588
2012-12-10 04:11:08	15.68	18.12	41253.2	1.13192		1.13192	-15.9837	-18.4709
2012-12-10 04:21:08	15.75	18.17	41253.2	1.13887		1.13887	-16.055	-18.5219
2012-12-10 04:31:08	15.81	18.24	41253.2	1.14581		1.14581	-16.1162	-18.5933
2012-12-10 04:41:08	15.81	18.22	41253.2	1.15276		1.15276	-16.1162	-18.5729
2012-12-10 04:51:08	15.88	18.31	41253.2	1.1597	41253.2	1.1597	-16.1876	-18.6646
2012-12-10 05:01:08	15.94	18.37	41253.2	1.16665		1.16665	-16.2487	-18.7258
2012-12-10 05:11:08	15.99	18.43	41253.2	1.17359		1.17359	-16.2997	-18.787
2012-12-10 05:21:08	16.02	18.45	41253.2	1.18054		1.18054	-16.3303	-18.8073
2012-12-10 05:31:08	16.09	18.52	41253.2	1.18748		1.18748	-16.4016	-18.8787
2012-12-10 05:41:08	16.14	18.55	41253.2	1.19442		1.19442	-16.4526	-18.9093
2012-12-10 05:51:08	16.17	18.6	41253.2	1.20137	41253.2	1.20137	-16.4832	-18.9602
2012-12-10 06:01:08	16.25	18.66	41253.3	1.20831		1.20831	-16.5647	-19.0214
2012-12-10 06:11:08	16.28	18.7	41253.3	1.21526		1.21526	-16.5953	-19.0622
2012-12-10 06:21:08	16.3	18.73	41253.3	1.2222		1.2222	-16.6157	-19.0928
2012-12-10 06:31:08	16.37	18.8	41253.3	1.22915		1.22915	-16.6871	-19.1641
2012-12-10 06:41:08	16.4	18.83	41253.3	1.23609		1.23609	-16.7176	-19.1947
2012-12-10 06:51:08	16.47	18.91	41253.3	1.24304	41253.3	1.24304	-16.789	-19.2762
2012-12-10 07:01:08	16.52	18.94	41253.3	1.24998		1.24998	-16.84	-19.3068
2012-12-10 07:11:08	16.25	18.68	41253.3	1.25692		1.25692	-16.5647	-19.0418
2012-12-10 07:21:08	16.26	18.69	41253.3	1.26387		1.26387	-16.5749	-19.052
2012-12-10 07:31:08	16.47	18.88	41253.3	1.27081		1.27081	-16.789	-19.2457
2012-12-10 07:41:08	16.53	18.95	41253.3	1.27776		1.27776	-16.8502	-19.317
2012-12-10 07:51:08	16.58	19.01	41253.3	1.2847	41253.3	1.2847	-16.9011	-19.3782
2012-12-10 08:01:08	16.64	19.06	41253.3	1.29165		1.29165	-16.9623	-19.4292
2012-12-10 08:11:08	16.61	19.04	41253.3	1.29859		1.29859	-16.9317	-19.4088
2012-12-10 08:21:08	16.64	19.07	41253.3	1.30554		1.30554	-16.9623	-19.4393
2012-12-10 08:31:08	16.68	19.13	41253.4	1.31248		1.31248	-17.0031	-19.5005
2012-12-10 08:41:08	16.72	19.15	41253.4	1.31942		1.31942	-17.0438	-19.5209
2012-12-10 08:51:08	16.72	19.15	41253.4	1.32637	41253.4	1.32637	-17.0438	-19.5209
2012-12-10 09:01:08	16.72	19.16	41253.4	1.33331		1.33331	-17.0438	-19.5311
2012-12-10 09:11:08	16.63	19.07	41253.4	1.34026		1.34026	-16.9521	-19.4393
2012-12-10 09:21:08	16.73	19.16	41253.4	1.3472		1.3472	-17.054	-19.5311
2012-12-10 09:31:08	16.48	18.92	41253.4	1.35415		1.35415	-16.7992	-19.2864
2012-12-10 09:41:08	16.7	19.13	41253.4	1.36109		1.36109	-17.0234	-19.5005
2012-12-10 09:51:08	16.82	19.24	41253.4	1.36804	41253.4	1.36804	-17.1458	-19.6126
2012-12-10 10:01:08	16.87	19.31	41253.4	1.37498		1.37498	-17.1967	-19.684
2012-12-10 10:11:08	16.91	19.35	41253.4	1.38192		1.38192	-17.2375	-19.7248
2012-12-10 10:21:08	17	19.44	41253.4	1.38887		1.38887	-17.3293	-19.8165
2012-12-10 10:31:08	17.09	19.53	41253.4	1.39581		1.39581	-17.421	-19.9083
2012-12-10 10:41:08	17.09	19.54	41253.4	1.40276		1.40276	-17.421	-19.9185
2012-12-10 10:51:08	17.11	19.57	41253.5	1.4097	41253.5	1.4097	-17.4414	-19.949
2012-12-10 11:01:08	17.14	19.6	41253.5	1.41665		1.41665	-17.472	-19.9796
2012-12-10 11:11:08	17.05	19.47	41253.5	1.42359		1.42359	-17.3802	-19.8471
2012-12-10 11:21:08	17.04	19.46	41253.5	1.43054		1.43054	-17.37	-19.8369
2012-12-10 11:31:08	17.1	19.54	41253.5	1.43748		1.43748	-17.4312	-19.9185
2012-12-10 11:41:08	17.15	19.57	41253.5	1.44442		1.44442	-17.4822	-19.949
2012-12-10 11:51:08	17.19	19.61	41253.5	1.45137	41253.5	1.45137	-17.5229	-19.9898
2012-12-10 12:01:08	17.26	19.68	41253.5	1.45831		1.45831	-17.5943	-20.0612
2012-12-10 12:11:08	17.26	19.69	41253.5	1.46526		1.46526	-17.5943	-20.0714
2012-12-10 12:21:08	17.23	19.66	41253.5	1.4722		1.4722	-17.5637	-20.0408
2012-12-10 12:31:08	17.28	19.68	41253.5	1.47915		1.47915	-17.6147	-20.0612
2012-12-10 12:41:08	17.32	19.73	41253.5	1.48609		1.48609	-17.6555	-20.1121
2012-12-10 12:51:08	17.29	19.71	41253.5	1.49304	41253.5	1.49304	-17.6249	-20.0917
2012-12-10 13:01:08	17.36	19.79	41253.5	1.49998		1.49998	-17.6962	-20.1733
2012-12-10 13:08:40	17.38	19.8	41253.5	1.50522		1.50522	-17.7166	-20.1835
2012-12-10 13:09:40	17.38	19.8	41253.5	1.50591		1.50591	-17.7166	-20.1835
2012-12-10 13:10:40	17.39	19.84	41253.5	1.5066		1.5066	-17.7268	-20.2243
2012-12-10 13:11:40	17.4	19.82	41253.5	1.5073		1.5073	-17.737	-20.2039
2012-12-10 13:12:40	17.4	19.82	41253.6	1.50799	41253.6	1.50799	-17.737	-20.2039
2012-12-10 13:13:40	17.42	19.85	41253.6	1.50869		1.50869	-17.7574	-20.2345
2012-12-10 13:14:40	17.42	19.84	41253.6	1.50938		1.50938	-17.7574	-20.2243
2012-12-10 13:15:40	17.41	19.83	41253.6	1.51008		1.51008	-17.7472	-20.2141
2012-12-10 13:16:40	17.44	19.85	41253.6	1.51077		1.51077	-17.7778	-20.2345
2012-12-10 13:17:40	17.43	19.86	41253.6	1.51147		1.51147	-17.7676	-20.2446
2012-12-10 13:18:40	17.44	19.87	41253.6	1.51216	41253.6	1.51216	-17.7778	-20.2548
2012-12-10 13:19:40	17.43	19.85	41253.6	1.51285		1.51285	-17.7676	-20.2345
2012-12-10 13:20:40	17.44	19.86	41253.6	1.51355		1.51355	-17.7778	-20.2446
2012-12-10 13:21:40	17.43	19.85	41253.6	1.51424		1.51424	-17.7676	-20.2345
2012-12-10 13:22:40	17.35	19.75	41253.6	1.51494		1.51494	-17.686	-20.1325
2012-12-10 13:23:40	17.35	19.78	41253.6	1.51563		1.51563	-17.686	-20.1631
2012-12-10 13:24:40	17.36	19.78	41253.6	1.51633	41253.6	1.51633	-17.6962	-20.1631
2012-12-10 13:25:40	17.4	19.85	41253.6	1.51702		1.51702	-17.737	-20.2345
2012-12-10 13:26:40	17.38	19.81	41253.6	1.51772		1.51772	-17.7166	-20.1937
2012-12-10 13:27:40	17.4	19.83	41253.6	1.51841		1.51841	-17.737	-20.2141
2012-12-10 13:28:40	17.43	19.83	41253.6	1.5191		1.5191	-17.7676	-20.2141
2012-12-10 13:29:40	17.43	19.86	41253.6	1.5198		1.5198	-17.7676	-20.2446
2012-12-10 13:30:40	17.43	19.85	41253.6	1.52049	41253.6	1.52049	-17.7676	-20.2345
2012-12-10 13:31:40	17.44	19.87	41253.6	1.52119		1.52119	-17.7778	-20.2548
2012-12-10 13:32:40	17.42	19.86	41253.6	1.52188		1.52188	-17.7574	-20.2446
2012-12-10 13:33:40	17.44	19.87	41253.6	1.52258		1.52258	-17.7778	-20.2548
2012-12-10 13:34:40	17.42	19.85	41253.6	1.52327		1.52327	-17.7574	-20.2345
2012-12-10 13:35:40	17.45	19.86	41253.6	1.52397		1.52397	-17.788	-20.2446
2012-12-10 13:36:40	17.44	19.87	41253.6	1.52466	41253.6	1.52466	-17.7778	-20.2548
2012-12-10 13:37:40	17.43	19.84	41253.6	1.52535		1.52535	-17.7676	-20.2243
2012-12-10 13:38:40	17.45	19.86	41253.6	1.52605		1.52605	-17.788	-20.2446
2012-12-10 13:39:40	17.46	19.89	41253.6	1.52674		1.52674	-17.7982	-20.2752
2012-12-10 13:40:40	17.48	19.88	41253.6	1.52744		1.52744	-17.8186	-20.265
2012-12-10 13:41:40	17.48	19.9	41253.6	1.52813		1.52813	-17.8186	-20.2854
2012-12-10 13:42:40	17.39	19.82	41253.6	1.52883	41253.6	1.52883	-17.7268	-20.2039
2012-12-10 13:43:40	17.4	19.83	41253.6	1.52952		1.52952	-17.737	-20.2141
2012-12-10 13:44:40	17.47	19.88	41253.6	1.53022		1.53022	-17.8084	-20.265
2012-12-10 13:45:40	17.46	19.86	41253.6	1.53091		1.53091	-17.7982	-20.2446
2012-12-10 13:46:40	17.48	19.9	41253.6	1.5316		1.5316	-17.8186	-20.2854
2012-12-10 13:47:40	17.49	19.9	41253.6	1.5323		1.5323	-17.8287	-20.2854
2012-12-10 13:48:40	17.48	19.91	41253.6	1.53299	41253.6	1.53299	-17.8186	-20.2956
2012-12-10 13:49:40	17.45	19.88	41253.6	1.53369		1.53369	-17.788	-20.265
2012-12-10 13:50:40	17.49	19.89	41253.6	1.53438		1.53438	-17.8287	-20.2752
2012-12-10 13:51:40	17.43	19.86	41253.6	1.53508		1.53508	-17.7676	-20.2446
2012-12-10 13:52:40	17.47	19.89	41253.6	1.53577		1.53577	-17.8084	-20.2752
2012-12-10 13:53:40	17.46	19.88	41253.6	1.53647		1.53647	-17.7982	-20.265
2012-12-10 13:54:40	17.45	19.88	41253.6	1.53716	41253.6	1.53716	-17.788	-20.265
2012-12-10 13:55:40	17.46	19.87	41253.6	1.53785		1.53785	-17.7982	-20.2548
2012-12-10 13:56:40	17.39	19.82	41253.6	1.53855		1.53855	-17.7268	-20.2039
2012-12-10 13:57:40	17.45	19.86	41253.6	1.53924		1.53924	-17.788	-20.2446
2012-12-10 13:58:40	17.44	19.86	41253.6	1.53994		1.53994	-17.7778	-20.2446
2012-12-10 13:59:40	17.47	19.89	41253.6	1.54063		1.54063	-17.8084	-20.2752
2012-12-10 14:00:40	17.49	19.88	41253.6	1.54133	41253.6	1.54133	-17.8287	-20.265
2012-12-10 14:01:40	17.46	19.89	41253.6	1.54202		1.54202	-17.7982	-20.2752
2012-12-10 14:02:40	17.46	19.9	41253.6	1.54272		1.54272	-17.7982	-20.2854
2012-12-10 14:03:40	17.49	19.92	41253.6	1.54341		1.54341	-17.8287	-20.3058
2012-12-10 14:04:40	17.5	19.93	41253.6	1.5441		1.5441	-17.8389	-20.316
2012-12-10 14:05:40	17.51	19.94	41253.6	1.5448		1.5448	-17.8491	-20.3262
2012-12-10 14:06:40	17.52	19.92	41253.6	1.54549	41253.6	1.54549	-17.8593	-20.3058
2012-12-10 14:07:40	17.53	19.96	41253.6	1.54619		1.54619	-17.8695	-20.3466
2012-12-10 14:08:40	17.55	19.96	41253.6	1.54688		1.54688	-17.8899	-20.3466
2012-12-10 14:18:40	17.59	20.01	41253.6	1.55383		1.55383	-17.9307	-20.3976
2012-12-10 14:28:40	17.62	20.04	41253.6	1.56077		1.56077	-17.9613	-20.4281
2012-12-10 14:38:40	17.68	20.1	41253.6	1.56772		1.56772	-18.0224	-20.4893
2012-12-10 14:48:40	17.72	20.14	41253.6	1.57466	41253.6	1.57466	-18.0632	-20.5301
2012-12-10 14:58:40	17.78	20.22	41253.6	1.5816		1.5816	-18.1244	-20.6116
2012-12-10 15:08:40	17.6	20	41253.6	1.58855		1.58855	-17.9409	-20.3874
2012-12-10 15:18:40	17.79	20.21	41253.6	1.59549		1.59549	-18.1346	-20.6014
2012-12-10 15:28:40	17.84	20.27	41253.6	1.60244		1.60244	-18.1855	-20.6626
2012-12-10 15:38:40	17.86	20.26	41253.7	1.60938		1.60938	-18.2059	-20.6524
2012-12-10 15:48:40	17.9	20.31	41253.7	1.61633	41253.7	1.61633	-18.2467	-20.7034
2012-12-10 15:58:40	17.95	20.36	41253.7	1.62327		1.62327	-18.2977	-20.7543
2012-12-10 16:08:40	17.95	20.36	41253.7	1.63022		1.63022	-18.2977	-20.7543
2012-12-10 16:18:40	17.97	20.39	41253.7	1.63716		1.63716	-18.318	-20.7849
2012-12-10 16:28:40	18.02	20.46	41253.7	1.6441		1.6441	-18.369	-20.8563
2012-12-10 16:38:40	18.06	20.46	41253.7	1.65105		1.65105	-18.4098	-20.8563
2012-12-10 16:48:40	18.1	20.52	41253.7	1.65799	41253.7	1.65799	-18.4506	-20.9174
2012-12-10 16:58:40	18.1	20.53	41253.7	1.66494		1.66494	-18.4506	-20.9276
2012-12-10 17:08:40	18.21	20.63	41253.7	1.67188		1.67188	-18.5627	-21.0296
2012-12-10 17:18:40	18.21	20.65	41253.7	1.67883		1.67883	-18.5627	-21.0499
2012-12-10 17:28:40	18.28	20.71	41253.7	1.68577		1.68577	-18.634	-21.1111
2012-12-10 17:38:40	18.33	20.76	41253.7	1.69272		1.69272	-18.685	-21.1621
2012-12-10 17:48:40	18.37	20.81	41253.7	1.69966	41253.7	1.69966	-18.7258	-21.213
2012-12-10 17:58:40	18.49	20.94	41253.7	1.7066		1.7066	-18.8481	-21.3456
2012-12-10 18:08:40	18.54	20.95	41253.8	1.71355		1.71355	-18.8991	-21.3558
2012-12-10 18:18:40	18.1	20.53	41253.8	1.72049		1.72049	-18.4506	-20.9276
2012-12-10 18:28:40	18.3	20.74	41253.8	1.72744		1.72744	-18.6544	-21.1417
2012-12-10 18:38:40	18.47	20.91	41253.8	1.73438		1.73438	-18.8277	-21.315
2012-12-10 18:48:40	18.6	21.01	41253.8	1.74133	41253.8	1.74133	-18.9602	-21.4169
2012-12-10 18:58:40	18.6	21.02	41253.8	1.74827		1.74827	-18.9602	-21.4271
2012-12-10 19:08:40	18.64	21.08	41253.8	1.75522		1.75522	-19.001	-21.4883
2012-12-10 19:18:40	18.66	21.1	41253.8	1.76216		1.76216	-19.0214	-21.5087
2012-12-10 19:28:40	18.69	21.14	41253.8	1.7691		1.7691	-19.052	-21.5494
2012-12-10 19:38:40	18.74	21.18	41253.8	1.77605		1.77605	-19.103	-21.5902
2012-12-10 19:48:40	18.81	21.25	41253.8	1.78299	41253.8	1.78299	-19.1743	-21.6616
2012-12-10 19:58:40	18.87	21.3	41253.8	1.78994		1.78994	-19.2355	-21.7125
2012-12-10 20:08:40	18.87	21.3	41253.8	1.79688		1.79688	-19.2355	-21.7125
2012-12-10 20:18:40	18.92	21.36	41253.8	1.80383		1.80383	-19.2864	-21.7737
2012-12-10 20:28:40	18.97	21.4	41253.9	1.81077		1.81077	-19.3374	-21.8145
2012-12-10 20:38:40	18.99	21.43	41253.9	1.81772		1.81772	-19.3578	-21.8451
2012-12-10 20:48:40	19	21.44	41253.9	1.82466	41253.9	1.82466	-19.368	-21.8552
2012-12-10 20:58:40	19.06	21.49	41253.9	1.8316		1.8316	-19.4292	-21.9062
2012-12-10 21:08:40	19.07	21.51	41253.9	1.83855		1.83855	-19.4393	-21.9266
2012-12-10 21:18:40	19.1	21.54	41253.9	1.84549		1.84549	-19.4699	-21.9572
2012-12-10 21:28:40	19.09	21.54	41253.9	1.85244		1.85244	-19.4597	-21.9572
2012-12-10 21:38:40	19.15	21.6	41253.9	1.85938		1.85938	-19.5209	-22.0183
2012-12-10 21:48:40	19.18	21.63	41253.9	1.86633	41253.9	1.86633	-19.5515	-22.0489
2012-12-10 21:58:40	19.24	21.69	41253.9	1.87327		1.87327	-19.6126	-22.1101
2012-12-10 22:08:40	19.23	21.67	41253.9	1.88022		1.88022	-19.6024	-22.0897
2012-12-10 22:18:40	19.29	21.74	41253.9	1.88716		1.88716	-19.6636	-22.1611
2012-12-10 22:28:40	19.35	21.8	41253.9	1.8941		1.8941	-19.7248	-22.2222
2012-12-10 22:38:40	19.41	21.86	41253.9	1.90105		1.90105	-19.7859	-22.2834
2012-12-10 22:48:40	19.42	21.85	41254	1.90799	41254	1.90799	-19.7961	-22.2732
2012-12-10 22:58:40	19.46	21.92	41254	1.91494		1.91494	-19.8369	-22.3445
2012-12-10 23:08:40	19.51	21.96	41254	1.92188		1.92188	-19.8879	-22.3853
2012-12-10 23:18:40	19.37	21.81	41254	1.92883		1.92883	-19.7452	-22.2324
2012-12-10 23:28:40	19.52	21.95	41254	1.93577		1.93577	-19.8981	-22.3751
2012-12-10 23:38:40	19.52	21.95	41254	1.94272		1.94272	-19.8981	-22.3751
2012-12-10 23:48:40	19.58	22.03	41254	1.94966	41254	1.94966	-19.9592	-22.4567
2012-12-10 23:58:40	19.62	22.03	41254	1.9566		1.9566	-20	-22.4567
2012-12-11 00:08:40	19.67	22.11	41254	1.96355		1.96355	-20.051	-22.5382
2012-12-11 00:18:40	19.65	22.08	41254	1.97049		1.97049	-20.0306	-22.5076
2012-12-11 00:28:40	19.7	22.13	41254	1.97744		1.97744	-20.0815	-22.5586
2012-12-11 00:38:40	19.74	22.17	41254	1.98438		1.98438	-20.1223	-22.5994
2012-12-11 00:48:40	19.76	22.19	41254	1.99133	41254	1.99133	-20.1427	-22.6198
2012-12-11 00:58:40	19.82	22.25	41254	1.99827		1.99827	-20.2039	-22.6809
2012-12-11 01:08:40	19.88	22.31	41254	2.00522		2.00522	-20.265	-22.7421
2012-12-11 01:18:40	19.9	22.32	41254.1	2.01216		2.01216	-20.2854	-22.7523
2012-12-11 01:28:40	19.95	22.38	41254.1	2.0191		2.0191	-20.3364	-22.8135
2012-12-11 01:38:40	19.89	22.32	41254.1	2.02605		2.02605	-20.2752	-22.7523
2012-12-11 01:48:40	20.02	22.44	41254.1	2.03299	41254.1	2.03299	-20.4077	-22.8746
2012-12-11 01:58:40	20.05	22.48	41254.1	2.03994		2.03994	-20.4383	-22.9154
2012-12-11 02:08:40	20.09	22.51	41254.1	2.04688		2.04688	-20.4791	-22.946
2012-12-11 02:18:40	20.13	22.56	41254.1	2.05383		2.05383	-20.5199	-22.9969
2012-12-11 02:28:40	20.13	22.56	41254.1	2.06077		2.06077	-20.5199	-22.9969
2012-12-11 02:38:40	20.2	22.63	41254.1	2.06772		2.06772	-20.5912	-23.0683
2012-12-11 02:48:40	20.25	22.69	41254.1	2.07466	41254.1	2.07466	-20.6422	-23.1295
2012-12-11 02:58:40	20.29	22.72	41254.1	2.0816		2.0816	-20.683	-23.16
2012-12-11 03:08:40	20.33	22.76	41254.1	2.08855		2.08855	-20.7238	-23.2008
2012-12-11 03:18:40	20.25	22.67	41254.1	2.09549		2.09549	-20.6422	-23.1091
2012-12-11 03:28:40	20.29	22.7	41254.1	2.10244		2.10244	-20.683	-23.1397
2012-12-11 03:38:40	20.33	22.75	41254.2	2.10938		2.10938	-20.7238	-23.1906
2012-12-11 03:48:40	20.38	22.78	41254.2	2.11633	41254.2	2.11633	-20.7747	-23.2212
2012-12-11 03:58:40	20.41	22.83	41254.2	2.12327		2.12327	-20.8053	-23.2722
2012-12-11 04:08:40	20.43	22.85	41254.2	2.13022		2.13022	-20.8257	-23.2926
2012-12-11 04:18:40	20.48	22.9	41254.2	2.13716		2.13716	-20.8767	-23.3435
2012-12-11 04:28:40	20.53	22.95	41254.2	2.1441		2.1441	-20.9276	-23.3945
2012-12-11 04:38:40	20.54	22.96	41254.2	2.15105		2.15105	-20.9378	-23.4047
2012-12-11 04:48:40	20.55	22.98	41254.2	2.15799	41254.2	2.15799	-20.948	-23.4251
2012-12-11 04:58:40	20.48	22.88	41254.2	2.16494		2.16494	-20.8767	-23.3231
2012-12-11 05:08:40	20.61	23.03	41254.2	2.17188		2.17188	-21.0092	-23.476
2012-12-11 05:18:40	20.68	23.08	41254.2	2.17883		2.17883	-21.0805	-23.527
2012-12-11 05:28:40	20.69	23.1	41254.2	2.18577		2.18577	-21.0907	-23.5474
2012-12-11 05:38:40	20.75	23.17	41254.2	2.19272		2.19272	-21.1519	-23.6188
2012-12-11 05:48:40	20.45	22.87	41254.2	2.19966	41254.2	2.19966	-20.8461	-23.3129
2012-12-11 05:58:40	20.68	23.09	41254.2	2.2066		2.2066	-21.0805	-23.5372
2012-12-11 06:08:40	20.73	23.16	41254.3	2.21355		2.21355	-21.1315	-23.6086
2012-12-11 06:18:40	20.78	23.21	41254.3	2.22049		2.22049	-21.1825	-23.6595
2012-12-11 06:28:40	20.76	23.17	41254.3	2.22744		2.22744	-21.1621	-23.6188
2012-12-11 06:38:40	20.82	23.24	41254.3	2.23438		2.23438	-21.2232	-23.6901
2012-12-11 06:48:40	20.86	23.27	41254.3	2.24133	41254.3	2.24133	-21.264	-23.7207
2012-12-11 06:58:40	20.88	23.31	41254.3	2.24827		2.24827	-21.2844	-23.7615
2012-12-11 07:08:40	20.95	23.37	41254.3	2.25522		2.25522	-21.3558	-23.8226
2012-12-11 07:18:40	20.87	23.28	41254.3	2.26216		2.26216	-21.2742	-23.7309
2012-12-11 07:28:40	21.02	23.44	41254.3	2.2691		2.2691	-21.4271	-23.894
2012-12-11 07:38:40	21.01	23.4	41254.3	2.27605		2.27605	-21.4169	-23.8532
2012-12-11 07:48:40	21.05	23.47	41254.3	2.28299	41254.3	2.28299	-21.4577	-23.9246
2012-12-11 07:58:40	21.1	23.52	41254.3	2.28994		2.28994	-21.5087	-23.9755
2012-12-11 08:08:40	21.14	23.55	41254.3	2.29688		2.29688	-21.5494	-24.0061
2012-12-11 08:18:40	21.19	23.6	41254.3	2.30383		2.30383	-21.6004	-24.0571
2012-12-11 08:28:40	20.91	23.31	41254.4	2.31077		2.31077	-21.315	-23.7615
2012-12-11 08:38:40	21.19	23.6	41254.4	2.31772		2.31772	-21.6004	-24.0571
2012-12-11 08:48:40	21.2	23.63	41254.4	2.32466	41254.4	2.32466	-21.6106	-24.0877
2012-12-11 08:58:40	21.25	23.67	41254.4	2.3316		2.3316	-21.6616	-24.1284
2012-12-11 09:08:40	21.27	23.7	41254.4	2.33855		2.33855	-21.682	-24.159
2012-12-11 09:18:40	21.31	23.73	41254.4	2.34549		2.34549	-21.7227	-24.1896
2012-12-11 09:28:40	21.35	23.76	41254.4	2.35244		2.35244	-21.7635	-24.2202
2012-12-11 09:38:40	21.39	23.78	41254.4	2.35938		2.35938	-21.8043	-24.2406
2012-12-11 09:48:40	21.41	23.82	41254.4	2.36633	41254.4	2.36633	-21.8247	-24.2813
2012-12-11 09:58:40	21.45	23.87	41254.4	2.37327		2.37327	-21.8654	-24.3323
2012-12-11 10:08:40	21.35	23.75	41254.4	2.38022		2.38022	-21.7635	-24.21
2012-12-11 10:18:40	21.46	23.88	41254.4	2.38716		2.38716	-21.8756	-24.3425
2012-12-11 10:28:40	21.5	23.92	41254.4	2.3941		2.3941	-21.9164	-24.3833
2012-12-11 10:38:40	21.52	23.95	41254.4	2.40105		2.40105	-21.9368	-24.4139
2012-12-11 10:48:40	21.53	23.96	41254.5	2.40799	41254.5	2.40799	-21.947	-24.4241
2012-12-11 10:58:40	21.58	24	41254.5	2.41494		2.41494	-21.998	-24.4648
2012-12-11 11:08:40	21.58	24	41254.5	2.42188		2.42188	-21.998	-24.4648
2012-12-11 11:18:40	21.65	24.08	41254.5	2.42883		2.42883	-22.0693	-24.5464
2012-12-11 11:28:40	21.7	24.11	41254.5	2.43577		2.43577	-22.1203	-24.577
2012-12-11 11:38:40	21.64	24.06	41254.5	2.44272		2.44272	-22.0591	-24.526
2012-12-11 11:48:40	21.72	24.12	41254.5	2.44966	41254.5	2.44966	-22.1407	-24.5872
2012-12-11 11:58:40	21.33	23.77	41254.5	2.4566		2.4566	-21.7431	-24.2304
2012-12-11 12:08:40	21.59	24.03	41254.5	2.46355		2.46355	-22.0082	-24.4954
2012-12-11 12:18:40	21.82	24.24	41254.5	2.47049		2.47049	-22.2426	-24.7095
2012-12-11 12:28:40	21.83	24.27	41254.5	2.47744		2.47744	-22.2528	-24.7401
2012-12-11 12:38:40	21.82	24.25	41254.5	2.48438		2.48438	-22.2426	-24.7197
2012-12-11 12:48:40	21.79	24.21	41254.5	2.49133	41254.5	2.49133	-22.212	-24.6789
2012-12-11 12:58:40	21.9	24.34	41254.5	2.49827		2.49827	-22.3242	-24.8114
2012-12-11 13:08:40	21.95	24.38	41254.5	2.50522		2.50522	-22.3751	-24.8522
2012-12-11 13:18:40	21.97	24.4	41254.6	2.51216		2.51216	-22.3955	-24.8726
2012-12-11 13:28:40	21.93	24.37	41254.6	2.5191		2.5191	-22.3547	-24.842
2012-12-11 13:38:40	21.81	24.23	41254.6	2.52605		2.52605	-22.2324	-24.6993
2012-12-11 13:48:40	21.98	24.42	41254.6	2.53299	41254.6	2.53299	-22.4057	-24.893
2012-12-11 13:58:40	22.04	24.48	41254.6	2.53994		2.53994	-22.4669	-24.9541
2012-12-11 14:08:40	22.09	24.52	41254.6	2.54688		2.54688	-22.5178	-24.9949
2012-12-11 14:18:40	22.12	24.54	41254.6	2.55383		2.55383	-22.5484	-25.0153
2012-12-11 14:28:40	22.12	24.55	41254.6	2.56077		2.56077	-22.5484	-25.0255
2012-12-11 14:38:40	22.15	24.58	41254.6	2.56772		2.56772	-22.579	-25.0561
2012-12-11 14:48:40	22.19	24.61	41254.6	2.57466	41254.6	2.57466	-22.6198	-25.0866
2012-12-11 14:58:40	22.24	24.67	41254.6	2.5816		2.5816	-22.6707	-25.1478
2012-12-11 15:08:40	22.28	24.72	41254.6	2.58855		2.58855	-22.7115	-25.1988
2012-12-11 15:18:40	22.28	24.72	41254.6	2.59549		2.59549	-22.7115	-25.1988
2012-12-11 15:28:40	22.36	24.79	41254.6	2.60244		2.60244	-22.7931	-25.2701
2012-12-11 15:38:40	22.38	24.81	41254.7	2.60938		2.60938	-22.8135	-25.2905
2012-12-11 15:48:40	22.43	24.86	41254.7	2.61633	41254.7	2.61633	-22.8644	-25.3415
2012-12-11 15:58:40	22.35	24.75	41254.7	2.62327		2.62327	-22.7829	-25.2294
2012-12-11 16:08:40	22.34	24.75	41254.7	2.63022		2.63022	-22.7727	-25.2294
2012-12-11 16:18:40	22.39	24.79	41254.7	2.63716		2.63716	-22.8236	-25.2701
2012-12-11 16:28:40	22.45	24.86	41254.7	2.6441		2.6441	-22.8848	-25.3415
2012-12-11 16:38:40	22.48	24.88	41254.7	2.65105		2.65105	-22.9154	-25.3619
2012-12-11 16:48:40	22.51	24.93	41254.7	2.65799	41254.7	2.65799	-22.946	-25.4128
2012-12-11 16:58:40	22.48	24.91	41254.7	2.66494		2.66494	-22.9154	-25.3925
2012-12-11 17:08:40	22.51	24.94	41254.7	2.67188		2.67188	-22.946	-25.423
2012-12-11 17:18:40	22.21	24.3	41254.7	2.67883		2.67883	-22.6402	-24.7706
2012-12-11 17:28:40	21.83	24.28	41254.7	2.68577		2.68577	-22.2528	-24.7503
2012-12-11 17:38:40	22.1	24.54	41254.7	2.69272		2.69272	-22.528	-25.0153
2012-12-11 17:48:40	22.34	24.78	41254.7	2.69966	41254.7	2.69966	-22.7727	-25.2599
2012-12-11 17:58:40	22.52	24.95	41254.7	2.7066		2.7066	-22.9562	-25.4332
2012-12-11 18:08:40	22.6	25.06	41254.8	2.71355		2.71355	-23.0377	-25.5454
2012-12-11 18:18:40	22.67	25.08	41254.8	2.72049		2.72049	-23.1091	-25.5657
2012-12-11 18:28:40	22.7	25.13	41254.8	2.72744		2.72744	-23.1397	-25.6167
2012-12-11 18:38:40	22.69	25.11	41254.8	2.73438		2.73438	-23.1295	-25.5963
2012-12-11 18:48:40	22.8	25.22	41254.8	2.74133	41254.8	2.74133	-23.2416	-25.7085
2012-12-11 18:58:40	22.84	25.26	41254.8	2.74827		2.74827	-23.2824	-25.7492
2012-12-11 19:08:40	22.88	25.3	41254.8	2.75522		2.75522	-23.3231	-25.79
2012-12-11 19:18:40	22.96	25.37	41254.8	2.76216		2.76216	-23.4047	-25.8614
2012-12-11 19:28:40	22.98	25.4	41254.8	2.7691		2.7691	-23.4251	-25.8919
2012-12-11 19:38:40	22.99	25.41	41254.8	2.77605		2.77605	-23.4353	-25.9021
2012-12-11 19:48:40	23.05	25.48	41254.8	2.78299	41254.8	2.78299	-23.4964	-25.9735
2012-12-11 19:58:40	23.12	25.54	41254.8	2.78994		2.78994	-23.5678	-26.0347
2012-12-11 20:08:40	23.19	25.61	41254.8	2.79688		2.79688	-23.6391	-26.106
2012-12-11 20:18:40	23.23	25.66	41254.8	2.80383		2.80383	-23.6799	-26.157
2012-12-11 20:28:40	23.28	25.71	41254.9	2.81077		2.81077	-23.7309	-26.208
2012-12-11 20:38:40	23.34	25.77	41254.9	2.81772		2.81772	-23.792	-26.2691
2012-12-11 20:48:40	23.38	25.8	41254.9	2.82466	41254.9	2.82466	-23.8328	-26.2997
2012-12-11 20:58:40	23.44	25.86	41254.9	2.8316		2.8316	-23.894	-26.3609
2012-12-11 21:08:40	23.47	25.87	41254.9	2.83855		2.83855	-23.9246	-26.371
2012-12-11 21:18:40	23.54	25.97	41254.9	2.84549		2.84549	-23.9959	-26.473
2012-12-11 21:28:40	23.58	26	41254.9	2.85244		2.85244	-24.0367	-26.5036
2012-12-11 21:38:40	23.58	25.99	41254.9	2.85938		2.85938	-24.0367	-26.4934
2012-12-11 21:48:40	23.57	26	41254.9	2.86633	41254.9	2.86633	-24.0265	-26.5036
2012-12-11 21:58:40	23.55	25.98	41254.9	2.87327		2.87327	-24.0061	-26.4832
2012-12-11 22:08:40	23.7	26.12	41254.9	2.88022		2.88022	-24.159	-26.6259
2012-12-11 22:18:40	23.74	26.17	41254.9	2.88716		2.88716	-24.1998	-26.6769
2012-12-11 22:28:40	23.78	26.21	41254.9	2.8941		2.8941	-24.2406	-26.7176
2012-12-11 22:38:40	23.83	26.26	41254.9	2.90105		2.90105	-24.2915	-26.7686
2012-12-11 22:48:40	23.86	26.29	41255	2.90799	41255	2.90799	-24.3221	-26.7992
2012-12-11 22:58:40	23.94	26.37	41255	2.91494		2.91494	-24.4037	-26.8807
2012-12-11 23:08:40	23.97	26.38	41255	2.92188		2.92188	-24.4343	-26.8909
2012-12-11 23:18:40	23.93	26.39	41255	2.92883		2.92883	-24.3935	-26.9011
2012-12-11 23:28:40	24.03	26.47	41255	2.93577		2.93577	-24.4954	-26.9827
2012-12-11 23:38:40	24.06	26.5	41255	2.94272		2.94272	-24.526	-27.0133
2012-12-11 23:48:40	24.12	26.56	41255	2.94966	41255	2.94966	-24.5872	-27.0744
2012-12-11 23:58:40	24.18	26.62	41255	2.9566		2.9566	-24.6483	-27.1356
2012-12-12 00:08:40	24.21	26.64	41255	2.96355		2.96355	-24.6789	-27.156
2012-12-12 00:18:40	24.25	26.69	41255	2.97049		2.97049	-24.7197	-27.2069
2012-12-12 00:28:40	24.3	26.74	41255	2.97744		2.97744	-24.7706	-27.2579
2012-12-12 00:38:40	24.34	26.77	41255	2.98438		2.98438	-24.8114	-27.2885
2012-12-12 00:48:40	24.39	26.83	41255	2.99133	41255	2.99133	-24.8624	-27.3496
2012-12-12 00:58:40	24.42	26.85	41255	2.99827		2.99827	-24.893	-27.37
2012-12-12 01:08:40	24.48	26.9	41255	3.00522		3.00522	-24.9541	-27.421
2012-12-12 01:18:40	24.5	26.94	41255.1	3.01216		3.01216	-24.9745	-27.4618
2012-12-12 01:28:40	24.45	26.89	41255.1	3.0191		3.0191	-24.9235	-27.4108
2012-12-12 01:38:40	24.54	26.97	41255.1	3.02605		3.02605	-25.0153	-27.4924
2012-12-12 01:48:40	24.54	26.97	41255.1	3.03299	41255.1	3.03299	-25.0153	-27.4924
2012-12-12 01:58:40	24.6	27.03	41255.1	3.03994		3.03994	-25.0765	-27.5535
2012-12-12 02:08:40	24.64	27.08	41255.1	3.04688		3.04688	-25.1172	-27.6045
2012-12-12 02:18:40	24.67	27.12	41255.1	3.05383		3.05383	-25.1478	-27.6453
2012-12-12 02:28:40	24.68	27.12	41255.1	3.06077		3.06077	-25.158	-27.6453
2012-12-12 02:38:40	24.74	27.18	41255.1	3.06772		3.06772	-25.2192	-27.7064
2012-12-12 02:48:40	24.79	27.2	41255.1	3.07466	41255.1	3.07466	-25.2701	-27.7268
2012-12-12 02:58:40	24.82	27.26	41255.1	3.0816		3.0816	-25.3007	-27.788
2012-12-12 03:08:40	24.82	27.26	41255.1	3.08855		3.08855	-25.3007	-27.788
2012-12-12 03:18:40	24.92	27.36	41255.1	3.09549		3.09549	-25.4027	-27.8899
2012-12-12 03:28:40	24.98	27.41	41255.1	3.10244		3.10244	-25.4638	-27.9409
2012-12-12 03:38:40	25	27.44	41255.2	3.10938		3.10938	-25.4842	-27.9715
2012-12-12 03:48:40	25.02	27.46	41255.2	3.11633	41255.2	3.11633	-25.5046	-27.9918
2012-12-12 03:58:40	25.08	27.5	41255.2	3.12327		3.12327	-25.5657	-28.0326
2012-12-12 04:08:40	25.1	27.53	41255.2	3.13022		3.13022	-25.5861	-28.0632
2012-12-12 04:18:40	25.13	27.57	41255.2	3.13716		3.13716	-25.6167	-28.104
2012-12-12 04:28:40	25.13	27.57	41255.2	3.1441		3.1441	-25.6167	-28.104
2012-12-12 04:38:40	25.16	27.61	41255.2	3.15105		3.15105	-25.6473	-28.1448
2012-12-12 04:48:40	25.21	27.64	41255.2	3.15799	41255.2	3.15799	-25.6983	-28.1753
2012-12-12 04:58:40	25.25	27.69	41255.2	3.16494		3.16494	-25.739	-28.2263
2012-12-12 05:08:40	25.28	27.71	41255.2	3.17188		3.17188	-25.7696	-28.2467
2012-12-12 05:18:40	25.28	27.73	41255.2	3.17883		3.17883	-25.7696	-28.2671
2012-12-12 05:28:40	25.3	27.76	41255.2	3.18577		3.18577	-25.79	-28.2977
2012-12-12 05:38:40	25.34	27.78	41255.2	3.19272		3.19272	-25.8308	-28.318
2012-12-12 05:48:40	25.33	27.77	41255.2	3.19966	41255.2	3.19966	-25.8206	-28.3078
2012-12-12 05:58:40	25.38	27.83	41255.2	3.2066		3.2066	-25.8716	-28.369
2012-12-12 06:08:40	25.42	27.87	41255.3	3.21355		3.21355	-25.9123	-28.4098
2012-12-12 06:18:40	25.47	27.91	41255.3	3.22049		3.22049	-25.9633	-28.4506
2012-12-12 06:28:40	25.52	27.96	41255.3	3.22744		3.22744	-26.0143	-28.5015
2012-12-12 06:38:40	25.55	28	41255.3	3.23438		3.23438	-26.0449	-28.5423
2012-12-12 06:48:40	25.59	28.03	41255.3	3.24133	41255.3	3.24133	-26.0856	-28.5729
2012-12-12 06:58:40	25.63	28.07	41255.3	3.24827		3.24827	-26.1264	-28.6137
2012-12-12 07:08:40	25.67	28.11	41255.3	3.25522		3.25522	-26.1672	-28.6544
2012-12-12 07:18:40	25.72	28.17	41255.3	3.26216		3.26216	-26.2181	-28.7156
2012-12-12 07:28:40	25.77	28.2	41255.3	3.2691		3.2691	-26.2691	-28.7462
2012-12-12 07:38:40	25.79	28.22	41255.3	3.27605		3.27605	-26.2895	-28.7666
2012-12-12 07:48:40	25.83	28.28	41255.3	3.28299	41255.3	3.28299	-26.3303	-28.8277
2012-12-12 07:58:40	25.89	28.33	41255.3	3.28994		3.28994	-26.3914	-28.8787
2012-12-12 08:08:40	25.93	28.37	41255.3	3.29688		3.29688	-26.4322	-28.9195
2012-12-12 08:18:40	25.95	28.39	41255.3	3.30383		3.30383	-26.4526	-28.9399
2012-12-12 08:28:40	25.99	28.44	41255.4	3.31077		3.31077	-26.4934	-28.9908
2012-12-12 08:38:40	26	28.44	41255.4	3.31772		3.31772	-26.5036	-28.9908
2012-12-12 08:48:40	26.04	28.5	41255.4	3.32466	41255.4	3.32466	-26.5443	-29.052
2012-12-12 08:58:40	26.09	28.53	41255.4	3.3316		3.3316	-26.5953	-29.0826
2012-12-12 09:08:40	26.12	28.55	41255.4	3.33855		3.33855	-26.6259	-29.103
2012-12-12 09:18:40	26.13	28.58	41255.4	3.34549		3.34549	-26.6361	-29.1335
2012-12-12 09:28:40	26.02	28.46	41255.4	3.35244		3.35244	-26.524	-29.0112
2012-12-12 09:38:40	26.14	28.59	41255.4	3.35938		3.35938	-26.6463	-29.1437
2012-12-12 09:48:40	26.18	28.61	41255.4	3.36633	41255.4	3.36633	-26.6871	-29.1641
2012-12-12 09:58:40	26.26	28.7	41255.4	3.37327		3.37327	-26.7686	-29.2559
2012-12-12 10:08:40	26.28	28.7	41255.4	3.38022		3.38022	-26.789	-29.2559
2012-12-12 10:18:40	26.31	28.74	41255.4	3.38716		3.38716	-26.8196	-29.2966
2012-12-12 10:28:40	26.34	28.78	41255.4	3.3941		3.3941	-26.8502	-29.3374
2012-12-12 10:38:40	26.4	28.84	41255.4	3.40105		3.40105	-26.9113	-29.3986
2012-12-12 10:48:40	26.44	28.86	41255.5	3.40799	41255.5	3.40799	-26.9521	-29.419
2012-12-12 10:58:40	26.48	28.91	41255.5	3.41494		3.41494	-26.9929	-29.4699
2012-12-12 11:08:40	26.52	28.94	41255.5	3.42188		3.42188	-27.0336	-29.5005
2012-12-12 11:18:40	26.46	28.89	41255.5	3.42883		3.42883	-26.9725	-29.4495
2012-12-12 11:28:40	26.53	28.94	41255.5	3.43577		3.43577	-27.0438	-29.5005
2012-12-12 11:38:40	26.57	29	41255.5	3.44272		3.44272	-27.0846	-29.5617
2012-12-12 11:48:40	26.57	29	41255.5	3.44966	41255.5	3.44966	-27.0846	-29.5617
2012-12-12 11:58:40	26.61	29.05	41255.5	3.4566		3.4566	-27.1254	-29.6126
2012-12-12 12:08:40	26.63	29.06	41255.5	3.46355		3.46355	-27.1458	-29.6228
2012-12-12 12:18:40	26.68	29.1	41255.5	3.47049		3.47049	-27.1967	-29.6636
2012-12-12 12:28:40	26.71	29.14	41255.5	3.47744		3.47744	-27.2273	-29.7044
2012-12-12 12:38:40	26.73	29.16	41255.5	3.48438		3.48438	-27.2477	-29.7248
2012-12-12 12:48:40	26.76	29.19	41255.5	3.49133	41255.5	3.49133	-27.2783	-29.7554
2012-12-12 12:58:40	26.81	29.25	41255.5	3.49827		3.49827	-27.3293	-29.8165
2012-12-12 13:08:40	26.86	29.28	41255.5	3.50522		3.50522	-27.3802	-29.8471
2012-12-12 13:18:40	26.89	29.3	41255.6	3.51216		3.51216	-27.4108	-29.8675
2012-12-12 13:28:40	26.91	29.33	41255.6	3.5191		3.5191	-27.4312	-29.8981
2012-12-12 13:38:40	26.96	29.38	41255.6	3.52605		3.52605	-27.4822	-29.949
2012-12-12 13:48:40	26.9	29.33	41255.6	3.53299	41255.6	3.53299	-27.421	-29.8981
2012-12-12 13:58:40	26.94	29.36	41255.6	3.53994		3.53994	-27.4618	-29.9286
2012-12-12 14:08:40	27.01	29.43	41255.6	3.54688		3.54688	-27.5331	-30
2012-12-12 14:18:40	27.04	29.46	41255.6	3.55383		3.55383	-27.5637	-30.0306
2012-12-12 14:28:40	27.09	29.52	41255.6	3.56077		3.56077	-27.6147	-30.0917
2012-12-12 14:38:40	27.14	29.56	41255.6	3.56772		3.56772	-27.6656	-30.1325
2012-12-12 14:48:40	27.13	29.56	41255.6	3.57466	41255.6	3.57466	-27.6555	-30.1325
2012-12-12 14:58:40	27.19	29.61	41255.6	3.5816		3.5816	-27.7166	-30.1835
2012-12-12 15:08:40	27.2	29.63	41255.6	3.58855		3.58855	-27.7268	-30.2039
2012-12-12 15:18:40	27.27	29.69	41255.6	3.59549		3.59549	-27.7982	-30.265
2012-12-12 15:28:40	27.28	29.72	41255.6	3.60244		3.60244	-27.8084	-30.2956
2012-12-12 15:38:40	27.34	29.76	41255.7	3.60938		3.60938	-27.8695	-30.3364
2012-12-12 15:48:40	27.41	29.83	41255.7	3.61633	41255.7	3.61633	-27.9409	-30.4077
2012-12-12 15:58:40	27.44	29.86	41255.7	3.62327		3.62327	-27.9715	-30.4383
2012-12-12 16:08:40	27.48	29.91	41255.7	3.63022		3.63022	-28.0122	-30.4893
2012-12-12 16:18:40	27.51	29.93	41255.7	3.63716		3.63716	-28.0428	-30.5097
2012-12-12 16:28:40	27.53	29.97	41255.7	3.6441		3.6441	-28.0632	-30.5505
2012-12-12 16:38:40	27.55	29.95	41255.7	3.65105		3.65105	-28.0836	-30.5301
2012-12-12 16:48:40	27.63	30.05	41255.7	3.65799	41255.7	3.65799	-28.1651	-30.632
2012-12-12 16:58:40	27.65	30.07	41255.7	3.66494		3.66494	-28.1855	-30.6524
2012-12-12 17:08:40	27.57	29.98	41255.7	3.67188		3.67188	-28.104	-30.5607
2012-12-12 17:18:40	27.62	30.03	41255.7	3.67883		3.67883	-28.1549	-30.6116
2012-12-12 17:28:40	27.69	30.09	41255.7	3.68577		3.68577	-28.2263	-30.6728
2012-12-12 17:38:40	27.71	30.15	41255.7	3.69272		3.69272	-28.2467	-30.7339
2012-12-12 17:48:40	27.66	30.08	41255.7	3.69966	41255.7	3.69966	-28.1957	-30.6626
2012-12-12 17:58:40	27.69	30.11	41255.7	3.7066		3.7066	-28.2263	-30.6932
2012-12-12 18:08:40	27.76	30.18	41255.8	3.71355		3.71355	-28.2977	-30.7645
2012-12-12 18:18:40	27.78	30.21	41255.8	3.72049		3.72049	-28.318	-30.7951
2012-12-12 18:28:40	27.83	30.25	41255.8	3.72744		3.72744	-28.369	-30.8359
2012-12-12 18:38:40	27.86	30.28	41255.8	3.73438		3.73438	-28.3996	-30.8665
2012-12-12 18:48:40	27.87	30.28	41255.8	3.74133	41255.8	3.74133	-28.4098	-30.8665
2012-12-12 18:58:40	27.9	30.32	41255.8	3.74827		3.74827	-28.4404	-30.9072
2012-12-12 19:08:40	27.91	30.33	41255.8	3.75522		3.75522	-28.4506	-30.9174
2012-12-12 19:18:40	27.99	30.41	41255.8	3.76216		3.76216	-28.5321	-30.999
2012-12-12 19:28:40	28.04	30.45	41255.8	3.7691		3.7691	-28.5831	-31.0398
2012-12-12 19:38:40	28.1	30.52	41255.8	3.77605		3.77605	-28.6442	-31.1111
2012-12-12 19:48:40	28.13	30.55	41255.8	3.78299	41255.8	3.78299	-28.6748	-31.1417
2012-12-12 19:58:40	28.17	30.59	41255.8	3.78994		3.78994	-28.7156	-31.1825
2012-12-12 20:08:40	28.22	30.63	41255.8	3.79688		3.79688	-28.7666	-31.2232
2012-12-12 20:18:40	28.19	30.62	41255.8	3.80383		3.80383	-28.736	-31.213
2012-12-12 20:28:40	28.25	30.67	41255.9	3.81077		3.81077	-28.7971	-31.264
2012-12-12 20:38:40	28.29	30.69	41255.9	3.81772		3.81772	-28.8379	-31.2844
2012-12-12 20:48:40	28.32	30.74	41255.9	3.82466	41255.9	3.82466	-28.8685	-31.3354
2012-12-12 20:58:40	28.37	30.79	41255.9	3.8316		3.8316	-28.9195	-31.3863
2012-12-12 21:08:40	28.42	30.84	41255.9	3.83855		3.83855	-28.9704	-31.4373
2012-12-12 21:18:40	28.44	30.85	41255.9	3.84549		3.84549	-28.9908	-31.4475
2012-12-12 21:28:40	28.5	30.92	41255.9	3.85244		3.85244	-29.052	-31.5189
2012-12-12 21:38:40	28.54	30.96	41255.9	3.85938		3.85938	-29.0928	-31.5596
2012-12-12 21:48:40	28.6	31.02	41255.9	3.86633	41255.9	3.86633	-29.1539	-31.6208
2012-12-12 21:58:40	28.63	31.05	41255.9	3.87327		3.87327	-29.1845	-31.6514
2012-12-12 22:08:40	28.69	31.11	41255.9	3.88022		3.88022	-29.2457	-31.7125
2012-12-12 22:18:40	28.73	31.15	41255.9	3.88716		3.88716	-29.2864	-31.7533
2012-12-12 22:28:40	28.77	31.19	41255.9	3.8941		3.8941	-29.3272	-31.7941
2012-12-12 22:38:40	28.78	31.22	41255.9	3.90105		3.90105	-29.3374	-31.8247
2012-12-12 22:48:40	28.8	31.22	41256	3.90799	41256	3.90799	-29.3578	-31.8247
2012-12-12 22:58:40	28.85	31.26	41256	3.91494		3.91494	-29.4088	-31.8654
2012-12-12 23:08:40	28.89	31.3	41256	3.92188		3.92188	-29.4495	-31.9062
2012-12-12 23:18:40	28.93	31.36	41256	3.92883		3.92883	-29.4903	-31.9674
2012-12-12 23:28:40	28.98	31.4	41256	3.93577		3.93577	-29.5413	-32.0082
2012-12-12 23:38:40	29	31.43	41256	3.94272		3.94272	-29.5617	-32.0387
2012-12-12 23:48:40	29.05	31.48	41256	3.94966	41256	3.94966	-29.6126	-32.0897
2012-12-12 23:58:40	29.09	31.51	41256	3.9566		3.9566	-29.6534	-32.1203
2012-12-13 00:08:40	29.13	31.56	41256	3.96355		3.96355	-29.6942	-32.1713
2012-12-13 00:18:40	29.19	31.63	41256	3.97049		3.97049	-29.7554	-32.2426
2012-12-13 00:28:40	29.21	31.64	41256	3.97744		3.97744	-29.7757	-32.2528
2012-12-13 00:38:40	29.26	31.69	41256	3.98438		3.98438	-29.8267	-32.3038
2012-12-13 00:48:40	29.33	31.75	41256	3.99133	41256	3.99133	-29.8981	-32.3649
2012-12-13 00:58:40	29.37	31.8	41256	3.99827		3.99827	-29.9388	-32.4159
2012-12-13 01:08:40	29.39	31.82	41256	4.00522		4.00522	-29.9592	-32.4363
2012-12-13 01:18:40	29.42	31.85	41256.1	4.01216		4.01216	-29.9898	-32.4669
2012-12-13 01:28:40	29.47	31.9	41256.1	4.0191		4.0191	-30.0408	-32.5178
2012-12-13 01:38:40	29.54	31.96	41256.1	4.02605		4.02605	-30.1121	-32.579
2012-12-13 01:48:40	29.56	31.98	41256.1	4.03299	41256.1	4.03299	-30.1325	-32.5994
2012-12-13 01:58:40	29.61	32.01	41256.1	4.03994		4.03994	-30.1835	-32.63
2012-12-13 02:08:40	29.64	32.06	41256.1	4.04688		4.04688	-30.2141	-32.6809
2012-12-13 02:18:40	29.68	32.09	41256.1	4.05383		4.05383	-30.2548	-32.7115
2012-12-13 02:28:40	29.73	32.16	41256.1	4.06077		4.06077	-30.3058	-32.7829
2012-12-13 02:38:40	29.78	32.21	41256.1	4.06772		4.06772	-30.3568	-32.8338
2012-12-13 02:48:40	29.8	32.23	41256.1	4.07466	41256.1	4.07466	-30.3772	-32.8542
2012-12-13 02:58:40	29.88	32.3	41256.1	4.0816		4.0816	-30.4587	-32.9256
2012-12-13 03:08:40	29.9	32.34	41256.1	4.08855		4.08855	-30.4791	-32.9664
2012-12-13 03:18:40	29.93	32.35	41256.1	4.09549		4.09549	-30.5097	-32.9766
2012-12-13 03:28:40	29.99	32.42	41256.1	4.10244		4.10244	-30.5708	-33.0479
2012-12-13 03:38:40	30.01	32.43	41256.2	4.10938		4.10938	-30.5912	-33.0581
2012-12-13 03:48:40	30.05	32.48	41256.2	4.11633	41256.2	4.11633	-30.632	-33.1091
2012-12-13 03:58:40	30.1	32.52	41256.2	4.12327		4.12327	-30.683	-33.1498
2012-12-13 04:08:40	30.14	32.56	41256.2	4.13022		4.13022	-30.7238	-33.1906
2012-12-13 04:18:40	30.19	32.61	41256.2	4.13716		4.13716	-30.7747	-33.2416
2012-12-13 04:28:40	30.21	32.64	41256.2	4.1441		4.1441	-30.7951	-33.2722
2012-12-13 04:38:40	30.27	32.69	41256.2	4.15105		4.15105	-30.8563	-33.3231
2012-12-13 04:48:40	30.29	32.72	41256.2	4.15799	41256.2	4.15799	-30.8767	-33.3537
2012-12-13 04:58:40	30.34	32.76	41256.2	4.16494		4.16494	-30.9276	-33.3945
2012-12-13 05:08:40	30.37	32.8	41256.2	4.17188		4.17188	-30.9582	-33.4353
2012-12-13 05:18:40	30.43	32.84	41256.2	4.17883		4.17883	-31.0194	-33.476
2012-12-13 05:28:40	30.46	32.89	41256.2	4.18577		4.18577	-31.0499	-33.527
2012-12-13 05:38:40	30.54	32.95	41256.2	4.19272		4.19272	-31.1315	-33.5882
2012-12-13 05:48:40	30.56	32.98	41256.2	4.19966	41256.2	4.19966	-31.1519	-33.6188
2012-12-13 05:58:40	30.59	33.01	41256.2	4.2066		4.2066	-31.1825	-33.6493
2012-12-13 06:08:40	30.61	33.04	41256.3	4.21355		4.21355	-31.2029	-33.6799
2012-12-13 06:18:40	30.66	33.09	41256.3	4.22049		4.22049	-31.2538	-33.7309
2012-12-13 06:28:40	30.67	33.11	41256.3	4.22744		4.22744	-31.264	-33.7513
2012-12-13 06:38:40	30.76	33.18	41256.3	4.23438		4.23438	-31.3558	-33.8226
2012-12-13 06:48:40	30.8	33.23	41256.3	4.24133	41256.3	4.24133	-31.3965	-33.8736
2012-12-13 06:58:40	30.85	33.28	41256.3	4.24827		4.24827	-31.4475	-33.9246
2012-12-13 07:08:40	30.85	33.27	41256.3	4.25522		4.25522	-31.4475	-33.9144
2012-12-13 07:18:40	30.93	33.36	41256.3	4.26216		4.26216	-31.5291	-34.0061
2012-12-13 07:28:40	30.99	33.41	41256.3	4.2691		4.2691	-31.5902	-34.0571
2012-12-13 07:38:40	31.04	33.45	41256.3	4.27605		4.27605	-31.6412	-34.0979
2012-12-13 07:48:40	31.09	33.51	41256.3	4.28299	41256.3	4.28299	-31.6922	-34.159
2012-12-13 07:58:40	31.12	33.54	41256.3	4.28994		4.28994	-31.7227	-34.1896
2012-12-13 08:08:40	31.16	33.58	41256.3	4.29688		4.29688	-31.7635	-34.2304
2012-12-13 08:18:40	31.2	33.62	41256.3	4.30383		4.30383	-31.8043	-34.2712
2012-12-13 08:28:40	31.21	33.64	41256.4	4.31077		4.31077	-31.8145	-34.2915
2012-12-13 08:38:40	31.29	33.72	41256.4	4.31772		4.31772	-31.896	-34.3731
2012-12-13 08:48:40	31.33	33.76	41256.4	4.32466	41256.4	4.32466	-31.9368	-34.4139
2012-12-13 08:58:40	31.4	33.83	41256.4	4.3316		4.3316	-32.0082	-34.4852
2012-12-13 09:08:40	31.42	33.84	41256.4	4.33855		4.33855	-32.0285	-34.4954
2012-12-13 09:18:40	31.5	33.9	41256.4	4.34549		4.34549	-32.1101	-34.5566
2012-12-13 09:28:40	31.54	33.96	41256.4	4.35244		4.35244	-32.1509	-34.6177
2012-12-13 09:38:40	31.57	34	41256.4	4.35938		4.35938	-32.1814	-34.6585
2012-12-13 09:48:40	31.61	34.04	41256.4	4.36633	41256.4	4.36633	-32.2222	-34.6993
2012-12-13 09:58:40	31.38	33.92	41256.4	4.37327		4.37327	-31.9878	-34.577
2012-12-13 10:08:40	31.7	34.11	41256.4	4.38022		4.38022	-32.314	-34.7706
2012-12-13 10:18:40	31.8	34.24	41256.4	4.38716		4.38716	-32.4159	-34.9032
2012-12-13 10:28:40	31.85	34.27	41256.4	4.3941		4.3941	-32.4669	-34.9337
2012-12-13 10:38:40	31.92	34.33	41256.4	4.40105		4.40105	-32.5382	-34.9949
2012-12-13 10:48:40	31.97	34.38	41256.5	4.40799	41256.5	4.40799	-32.5892	-35.0459
2012-12-13 10:58:40	32	34.42	41256.5	4.41494		4.41494	-32.6198	-35.0866
2012-12-13 11:08:40	32.05	34.47	41256.5	4.42188		4.42188	-32.6707	-35.1376
2012-12-13 11:18:40	32.12	34.54	41256.5	4.42883		4.42883	-32.7421	-35.209
2012-12-13 11:28:40	32.16	34.58	41256.5	4.43577		4.43577	-32.7829	-35.2497
2012-12-13 11:38:40	32.21	34.64	41256.5	4.44272		4.44272	-32.8338	-35.3109
2012-12-13 11:48:40	32.27	34.68	41256.5	4.44966	41256.5	4.44966	-32.895	-35.3517
2012-12-13 11:58:40	32.33	34.74	41256.5	4.4566		4.4566	-32.9562	-35.4128
2012-12-13 12:08:40	32.35	34.77	41256.5	4.46355		4.46355	-32.9766	-35.4434
2012-12-13 12:18:40	32.42	34.84	41256.5	4.47049		4.47049	-33.0479	-35.5148
2012-12-13 12:28:40	32.47	34.88	41256.5	4.47744		4.47744	-33.0989	-35.5556
2012-12-13 12:38:40	32.52	34.93	41256.5	4.48438		4.48438	-33.1498	-35.6065
2012-12-13 12:48:40	32.56	34.98	41256.5	4.49133	41256.5	4.49133	-33.1906	-35.6575
2012-12-13 12:58:40	32.55	34.97	41256.5	4.49827		4.49827	-33.1804	-35.6473
2012-12-13 13:08:40	32.65	35.08	41256.5	4.50522		4.50522	-33.2824	-35.7594
2012-12-13 13:18:40	32.19	34.63	41256.6	4.51216		4.51216	-32.8135	-35.3007
2012-12-13 13:28:40	32.43	34.85	41256.6	4.5191		4.5191	-33.0581	-35.525
2012-12-13 13:38:40	32.5	34.91	41256.6	4.52605		4.52605	-33.1295	-35.5861
2012-12-13 13:48:40	32.58	35	41256.6	4.53299	41256.6	4.53299	-33.211	-35.6779
2012-12-13 13:58:40	32.64	35.04	41256.6	4.53994		4.53994	-33.2722	-35.7187
2012-12-13 14:08:40	32.69	35.09	41256.6	4.54688		4.54688	-33.3231	-35.7696
2012-12-13 14:18:40	32.7	35.1	41256.6	4.55383		4.55383	-33.3333	-35.7798
2012-12-13 14:28:40	32.8	35.21	41256.6	4.56077		4.56077	-33.4353	-35.8919
2012-12-13 14:38:40	32.85	35.24	41256.6	4.56772		4.56772	-33.4862	-35.9225
2012-12-13 14:48:40	32.89	35.29	41256.6	4.57466	41256.6	4.57466	-33.527	-35.9735
2012-12-13 14:58:40	32.99	35.38	41256.6	4.5816		4.5816	-33.629	-36.0652
2012-12-13 15:08:40	33.05	35.45	41256.6	4.58855		4.58855	-33.6901	-36.1366
2012-12-13 15:18:40	33.13	35.52	41256.6	4.59549		4.59549	-33.7717	-36.208
2012-12-13 15:28:40	33.16	35.54	41256.6	4.60244		4.60244	-33.8022	-36.2283
2012-12-13 15:38:40	33.24	35.64	41256.7	4.60938		4.60938	-33.8838	-36.3303
2012-12-13 15:48:40	33.34	35.73	41256.7	4.61633	41256.7	4.61633	-33.9857	-36.422
2012-12-13 15:58:40	33.41	35.8	41256.7	4.62327		4.62327	-34.0571	-36.4934
2012-12-13 16:08:40	33.46	35.85	41256.7	4.63022		4.63022	-34.1081	-36.5443
2012-12-13 16:18:40	33.53	35.92	41256.7	4.63716		4.63716	-34.1794	-36.6157
2012-12-13 16:28:40	33.61	36	41256.7	4.6441		4.6441	-34.261	-36.6972
2012-12-13 16:38:40	33.66	36.04	41256.7	4.65105		4.65105	-34.3119	-36.738
2012-12-13 16:48:40	33.72	36.11	41256.7	4.65799	41256.7	4.65799	-34.3731	-36.8094
2012-12-13 16:58:40	33.82	36.21	41256.7	4.66494		4.66494	-34.475	-36.9113
2012-12-13 17:08:40	33.88	36.27	41256.7	4.67188		4.67188	-34.5362	-36.9725
2012-12-13 17:18:40	33.97	36.37	41256.7	4.67883		4.67883	-34.6279	-37.0744
2012-12-13 17:28:40	34.04	36.42	41256.7	4.68577		4.68577	-34.6993	-37.1254
2012-12-13 17:38:40	34.11	36.51	41256.7	4.69272		4.69272	-34.7706	-37.2171
2012-12-13 17:48:40	34.17	36.58	41256.7	4.69966	41256.7	4.69966	-34.8318	-37.2885
2012-12-13 17:58:40	34.24	36.64	41256.7	4.7066		4.7066	-34.9032	-37.3496
2012-12-13 18:08:40	34.33	36.72	41256.8	4.71355		4.71355	-34.9949	-37.4312
2012-12-13 18:18:40	34.4	36.79	41256.8	4.72049		4.72049	-35.0663	-37.5025
2012-12-13 18:28:40	34.48	36.88	41256.8	4.72744		4.72744	-35.1478	-37.5943
2012-12-13 18:38:40	34.55	36.94	41256.8	4.73438		4.73438	-35.2192	-37.6555
2012-12-13 18:48:40	34.62	37.02	41256.8	4.74133	41256.8	4.74133	-35.2905	-37.737
2012-12-13 18:58:40	34.7	37.09	41256.8	4.74827		4.74827	-35.3721	-37.8084
2012-12-13 19:08:40	34.76	37.16	41256.8	4.75522		4.75522	-35.4332	-37.8797
2012-12-13 19:18:40	34.88	37.27	41256.8	4.76216		4.76216	-35.5556	-37.9918
2012-12-13 19:28:40	34.9	37.31	41256.8	4.7691		4.7691	-35.5759	-38.0326
2012-12-13 19:38:40	34.97	37.38	41256.8	4.77605		4.77605	-35.6473	-38.104
2012-12-13 19:48:40	35.07	37.47	41256.8	4.78299	41256.8	4.78299	-35.7492	-38.1957
2012-12-13 19:58:40	35.12	37.53	41256.8	4.78994		4.78994	-35.8002	-38.2569
2012-12-13 20:08:40	35.2	37.6	41256.8	4.79688		4.79688	-35.8818	-38.3282
2012-12-13 20:18:40	35.27	37.66	41256.8	4.80383		4.80383	-35.9531	-38.3894
2012-12-13 20:28:40	35.35	37.76	41256.9	4.81077		4.81077	-36.0347	-38.4913
2012-12-13 20:38:40	35.41	37.82	41256.9	4.81772		4.81772	-36.0958	-38.5525
2012-12-13 20:48:40	35.48	37.89	41256.9	4.82466	41256.9	4.82466	-36.1672	-38.6239
2012-12-13 20:58:40	35.57	37.98	41256.9	4.8316		4.8316	-36.2589	-38.7156
2012-12-13 21:08:40	35.62	38.03	41256.9	4.83855		4.83855	-36.3099	-38.7666
2012-12-13 21:18:40	35.72	38.13	41256.9	4.84549		4.84549	-36.4118	-38.8685
2012-12-13 21:28:40	35.8	38.2	41256.9	4.85244		4.85244	-36.4934	-38.9399
2012-12-13 21:38:40	35.83	38.25	41256.9	4.85938		4.85938	-36.524	-38.9908
2012-12-13 21:48:40	35.91	38.32	41256.9	4.86633	41256.9	4.86633	-36.6055	-39.0622
2012-12-13 21:58:40	35.98	38.41	41256.9	4.87327		4.87327	-36.6769	-39.1539
2012-12-13 22:08:40	35.99	38.42	41256.9	4.88022		4.88022	-36.6871	-39.1641
2012-12-13 22:18:40	36.11	38.51	41256.9	4.88716		4.88716	-36.8094	-39.2559
2012-12-13 22:28:40	36.15	38.57	41256.9	4.8941		4.8941	-36.8502	-39.317
2012-12-13 22:38:40	36.24	38.66	41256.9	4.90105		4.90105	-36.9419	-39.4088
2012-12-13 22:48:40	36.31	38.73	41257	4.90799	41257	4.90799	-37.0133	-39.4801
2012-12-13 22:58:40	36.38	38.81	41257	4.91494		4.91494	-37.0846	-39.5617
2012-12-13 23:08:40	36.46	38.88	41257	4.92188		4.92188	-37.1662	-39.633
2012-12-13 23:18:40	36.54	38.96	41257	4.92883		4.92883	-37.2477	-39.7146
2012-12-13 23:28:40	36.59	39.03	41257	4.93577		4.93577	-37.2987	-39.7859
2012-12-13 23:38:40	36.65	39.06	41257	4.94272		4.94272	-37.3598	-39.8165
2012-12-13 23:48:40	36.74	39.16	41257	4.94966	41257	4.94966	-37.4516	-39.9185
2012-12-13 23:58:40	36.8	39.22	41257	4.9566		4.9566	-37.5127	-39.9796
2012-12-14 00:08:40	36.89	39.31	41257	4.96355		4.96355	-37.6045	-40.0714
2012-12-14 00:18:40	36.98	39.4	41257	4.97049		4.97049	-37.6962	-40.1631
2012-12-14 00:28:40	37.04	39.47	41257	4.97744		4.97744	-37.7574	-40.2345
2012-12-14 00:38:40	37.1	39.52	41257	4.98438		4.98438	-37.8186	-40.2854
2012-12-14 00:48:40	37.17	39.59	41257	4.99133	41257	4.99133	-37.8899	-40.3568
2012-12-14 00:58:40	37.27	39.7	41257	4.99827		4.99827	-37.9918	-40.4689
2012-12-14 01:08:40	37.32	39.75	41257	5.00522		5.00522	-38.0428	-40.5199
2012-12-14 01:18:40	37.4	39.82	41257.1	5.01216		5.01216	-38.1244	-40.5912
2012-12-14 01:28:40	37.47	39.9	41257.1	5.0191		5.0191	-38.1957	-40.6728
2012-12-14 01:38:40	37.56	39.98	41257.1	5.02605		5.02605	-38.2875	-40.7543
2012-12-14 01:48:40	37.62	40.05	41257.1	5.03299	41257.1	5.03299	-38.3486	-40.8257
2012-12-14 01:58:40	37.69	40.12	41257.1	5.03994		5.03994	-38.42	-40.897
2012-12-14 02:08:40	37.75	40.18	41257.1	5.04688		5.04688	-38.4811	-40.9582
2012-12-14 02:18:40	37.84	40.24	41257.1	5.05383		5.05383	-38.5729	-41.0194
2012-12-14 02:28:40	37.92	40.33	41257.1	5.06077		5.06077	-38.6544	-41.1111
2012-12-14 02:38:40	37.98	40.41	41257.1	5.06772		5.06772	-38.7156	-41.1927
2012-12-14 02:48:40	38.06	40.48	41257.1	5.07466	41257.1	5.07466	-38.7971	-41.264
2012-12-14 02:58:40	38.17	40.59	41257.1	5.0816		5.0816	-38.9093	-41.3761
2012-12-14 03:08:40	38.24	40.67	41257.1	5.08855		5.08855	-38.9806	-41.4577
2012-12-14 03:18:40	38.31	40.74	41257.1	5.09549		5.09549	-39.052	-41.5291
2012-12-14 03:28:40	38.37	40.8	41257.1	5.10244		5.10244	-39.1131	-41.5902
2012-12-14 03:38:40	38.45	40.89	41257.2	5.10938		5.10938	-39.1947	-41.682
2012-12-14 03:48:40	38.54	40.96	41257.2	5.11633	41257.2	5.11633	-39.2864	-41.7533
2012-12-14 03:58:40	38.62	41.03	41257.2	5.12327		5.12327	-39.368	-41.8247
2012-12-14 04:08:40	38.69	41.11	41257.2	5.13022		5.13022	-39.4393	-41.9062
2012-12-14 04:18:40	38.73	41.14	41257.2	5.13716		5.13716	-39.4801	-41.9368
2012-12-14 04:28:40	38.81	41.26	41257.2	5.1441		5.1441	-39.5617	-42.0591
2012-12-14 04:38:40	38.88	41.31	41257.2	5.15105		5.15105	-39.633	-42.1101
2012-12-14 04:48:40	38.96	41.38	41257.2	5.15799	41257.2	5.15799	-39.7146	-42.1814
2012-12-14 04:58:40	39.02	41.44	41257.2	5.16494		5.16494	-39.7757	-42.2426
2012-12-14 05:08:40	39.09	41.52	41257.2	5.17188		5.17188	-39.8471	-42.3242
2012-12-14 05:18:40	39.15	41.57	41257.2	5.17883		5.17883	-39.9083	-42.3751
2012-12-14 05:28:40	39.21	41.63	41257.2	5.18577		5.18577	-39.9694	-42.4363
2012-12-14 05:38:40	39.29	41.72	41257.2	5.19272		5.19272	-40.051	-42.528
2012-12-14 05:48:40	39.36	41.79	41257.2	5.19966	41257.2	5.19966	-40.1223	-42.5994
2012-12-14 05:58:40	39.43	41.86	41257.2	5.2066		5.2066	-40.1937	-42.6707
2012-12-14 06:08:40	39.47	41.93	41257.3	5.21355		5.21355	-40.2345	-42.7421
2012-12-14 06:18:40	39.56	42	41257.3	5.22049		5.22049	-40.3262	-42.8135
2012-12-14 06:28:40	39.67	42.09	41257.3	5.22744		5.22744	-40.4383	-42.9052
2012-12-14 06:38:40	39.73	42.15	41257.3	5.23438		5.23438	-40.4995	-42.9664
2012-12-14 06:48:40	39.78	42.21	41257.3	5.24133	41257.3	5.24133	-40.5505	-43.0275
2012-12-14 06:58:40	39.87	42.31	41257.3	5.24827		5.24827	-40.6422	-43.1295
2012-12-14 07:08:40	39.96	42.37	41257.3	5.25522		5.25522	-40.7339	-43.1906
2012-12-14 07:18:40	40.02	42.44	41257.3	5.26216		5.26216	-40.7951	-43.262
2012-12-14 07:28:40	40.1	42.54	41257.3	5.2691		5.2691	-40.8767	-43.3639
2012-12-14 07:38:40	40.17	42.61	41257.3	5.27605		5.27605	-40.948	-43.4353
2012-12-14 07:48:40	40.22	42.65	41257.3	5.28299	41257.3	5.28299	-40.999	-43.476
2012-12-14 07:58:40	40.27	42.69	41257.3	5.28994		5.28994	-41.0499	-43.5168
2012-12-14 08:08:40	40.27	42.71	41257.3	5.29688		5.29688	-41.0499	-43.5372
2012-12-14 08:18:40	40.31	42.76	41257.3	5.30383		5.30383	-41.0907	-43.5882
2012-12-14 08:28:40	40.4	42.84	41257.4	5.31077		5.31077	-41.1825	-43.6697
2012-12-14 08:38:40	40.47	42.91	41257.4	5.31772		5.31772	-41.2538	-43.7411
2012-12-14 08:48:40	40.49	42.93	41257.4	5.32466	41257.4	5.32466	-41.2742	-43.7615
2012-12-14 08:58:40	40.54	42.96	41257.4	5.3316		5.3316	-41.3252	-43.792
2012-12-14 09:08:40	40.62	43.05	41257.4	5.33855		5.33855	-41.4067	-43.8838
2012-12-14 09:18:40	40.69	43.12	41257.4	5.34549		5.34549	-41.4781	-43.9551
2012-12-14 09:28:40	40.52	42.95	41257.4	5.35244		5.35244	-41.3048	-43.7819
2012-12-14 09:38:40	40.71	43.14	41257.4	5.35938		5.35938	-41.4985	-43.9755
2012-12-14 09:48:40	40.81	43.23	41257.4	5.36633	41257.4	5.36633	-41.6004	-44.0673
2012-12-14 09:58:40	40.91	43.32	41257.4	5.37327		5.37327	-41.7023	-44.159
2012-12-14 10:08:40	41	43.4	41257.4	5.38022		5.38022	-41.7941	-44.2406
2012-12-14 10:18:40	41.07	43.48	41257.4	5.38716		5.38716	-41.8654	-44.3221
2012-12-14 10:28:40	41.13	43.55	41257.4	5.3941		5.3941	-41.9266	-44.3935
2012-12-14 10:38:40	41.06	43.46	41257.4	5.40105		5.40105	-41.8552	-44.3017
2012-12-14 10:48:40	41.15	43.53	41257.5	5.40799	41257.5	5.40799	-41.947	-44.3731
2012-12-14 10:58:40	41.22	43.6	41257.5	5.41494		5.41494	-42.0183	-44.4444
2012-12-14 11:08:40	41.29	43.69	41257.5	5.42188		5.42188	-42.0897	-44.5362
2012-12-14 11:18:40	41.34	43.73	41257.5	5.42883		5.42883	-42.1407	-44.577
2012-12-14 11:28:40	41.42	43.81	41257.5	5.43577		5.43577	-42.2222	-44.6585
2012-12-14 11:38:40	41.49	43.88	41257.5	5.44272		5.44272	-42.2936	-44.7299
2012-12-14 11:48:40	41.56	43.96	41257.5	5.44966	41257.5	5.44966	-42.3649	-44.8114
2012-12-14 11:58:40	41.65	44.05	41257.5	5.4566		5.4566	-42.4567	-44.9032
2012-12-14 12:08:40	41.71	44.11	41257.5	5.46355		5.46355	-42.5178	-44.9643
2012-12-14 12:18:40	41.76	44.17	41257.5	5.47049		5.47049	-42.5688	-45.0255
2012-12-14 12:28:40	41.8	44.18	41257.5	5.47744		5.47744	-42.6096	-45.0357
2012-12-14 12:38:40	41.86	44.26	41257.5	5.48438		5.48438	-42.6707	-45.1172
2012-12-14 12:48:40	41.92	44.32	41257.5	5.49133	41257.5	5.49133	-42.7319	-45.1784
2012-12-14 12:58:40	42.02	44.39	41257.5	5.49827		5.49827	-42.8338	-45.2497
2012-12-14 13:08:40	42.04	44.46	41257.5	5.50522		5.50522	-42.8542	-45.3211
2012-12-14 13:18:40	42.14	44.53	41257.6	5.51216		5.51216	-42.9562	-45.3925
2012-12-14 13:28:40	42.2	44.58	41257.6	5.5191		5.5191	-43.0173	-45.4434
2012-12-14 13:38:40	42.23	44.63	41257.6	5.52605		5.52605	-43.0479	-45.4944
2012-12-14 13:48:40	42.3	44.68	41257.6	5.53299	41257.6	5.53299	-43.1193	-45.5454
2012-12-14 13:58:40	42.41	44.8	41257.6	5.53994		5.53994	-43.2314	-45.6677
2012-12-14 14:08:40	42.48	44.87	41257.6	5.54688		5.54688	-43.3028	-45.739
2012-12-14 14:18:40	42.58	44.97	41257.6	5.55383		5.55383	-43.4047	-45.841
2012-12-14 14:28:40	42.67	45.04	41257.6	5.56077		5.56077	-43.4964	-45.9123
2012-12-14 14:38:40	42.71	45.1	41257.6	5.56772		5.56772	-43.5372	-45.9735
2012-12-14 14:48:40	42.8	45.19	41257.6	5.57466	41257.6	5.57466	-43.629	-46.0652
2012-12-14 14:58:40	42.89	45.28	41257.6	5.5816		5.5816	-43.7207	-46.157
2012-12-14 15:08:40	42.96	45.35	41257.6	5.58855		5.58855	-43.792	-46.2283
2012-12-14 15:18:40	43.04	45.42	41257.6	5.59549		5.59549	-43.8736	-46.2997
2012-12-14 15:28:40	43.12	45.51	41257.6	5.60244		5.60244	-43.9551	-46.3914
2012-12-14 15:38:40	43.21	45.59	41257.7	5.60938		5.60938	-44.0469	-46.473
2012-12-14 15:48:40	43.27	45.66	41257.7	5.61633	41257.7	5.61633	-44.1081	-46.5443
2012-12-14 15:58:40	43.37	45.76	41257.7	5.62327		5.62327	-44.21	-46.6463
2012-12-14 16:08:40	43.42	45.82	41257.7	5.63022		5.63022	-44.261	-46.7074
2012-12-14 16:18:40	43.51	45.9	41257.7	5.63716		5.63716	-44.3527	-46.789
2012-12-14 16:28:40	43.62	46.01	41257.7	5.6441		5.6441	-44.4648	-46.9011
2012-12-14 16:38:40	43.71	46.08	41257.7	5.65105		5.65105	-44.5566	-46.9725
2012-12-14 16:48:40	43.79	46.19	41257.7	5.65799	41257.7	5.65799	-44.6381	-47.0846
2012-12-14 16:58:40	43.9	46.29	41257.7	5.66494		5.66494	-44.7503	-47.1865
2012-12-14 17:08:40	43.98	46.36	41257.7	5.67188		5.67188	-44.8318	-47.2579
2012-12-14 17:18:40	44.07	46.48	41257.7	5.67883		5.67883	-44.9235	-47.3802
2012-12-14 17:28:40	44.16	46.55	41257.7	5.68577		5.68577	-45.0153	-47.4516
2012-12-14 17:38:40	44.23	46.62	41257.7	5.69272		5.69272	-45.0866	-47.5229
2012-12-14 17:48:40	44.34	46.74	41257.7	5.69966	41257.7	5.69966	-45.1988	-47.6453
2012-12-14 17:58:40	44.44	46.81	41257.7	5.7066		5.7066	-45.3007	-47.7166
2012-12-14 18:08:40	44.53	46.91	41257.8	5.71355		5.71355	-45.3925	-47.8186
2012-12-14 18:18:40	44.65	47.04	41257.8	5.72049		5.72049	-45.5148	-47.9511
2012-12-14 18:28:40	44.74	47.14	41257.8	5.72744		5.72744	-45.6065	-48.053
2012-12-14 18:38:40	44.83	47.22	41257.8	5.73438		5.73438	-45.6983	-48.1346
2012-12-14 18:48:40	44.93	47.32	41257.8	5.74133	41257.8	5.74133	-45.8002	-48.2365
2012-12-14 18:58:40	45.03	47.44	41257.8	5.74827		5.74827	-45.9021	-48.3588
2012-12-14 19:08:40	45.12	47.5	41257.8	5.75522		5.75522	-45.9939	-48.42
2012-12-14 19:18:40	45.18	47.58	41257.8	5.76216		5.76216	-46.055	-48.5015
2012-12-14 19:28:40	45.18	47.6	41257.8	5.7691		5.7691	-46.055	-48.5219
2012-12-14 19:38:40	45.34	47.75	41257.8	5.77605		5.77605	-46.2181	-48.6748
2012-12-14 19:48:40	45.35	47.74	41257.8	5.78299	41257.8	5.78299	-46.2283	-48.6646
2012-12-14 19:58:40	45.43	47.82	41257.8	5.78994		5.78994	-46.3099	-48.7462
2012-12-14 20:08:40	45.48	47.86	41257.8	5.79688		5.79688	-46.3609	-48.787
2012-12-14 20:18:40	45.62	47.99	41257.8	5.80383		5.80383	-46.5036	-48.9195
2012-12-14 20:28:40	45.76	48.12	41257.9	5.81077		5.81077	-46.6463	-49.052
2012-12-14 20:38:40	45.88	48.24	41257.9	5.81772		5.81772	-46.7686	-49.1743
2012-12-14 20:48:40	46.02	48.36	41257.9	5.82466	41257.9	5.82466	-46.9113	-49.2966
2012-12-14 20:58:40	46.13	48.48	41257.9	5.8316		5.8316	-47.0234	-49.419
2012-12-14 21:08:40	46.22	48.56	41257.9	5.83855		5.83855	-47.1152	-49.5005
2012-12-14 21:18:40	46.37	48.71	41257.9	5.84549		5.84549	-47.2681	-49.6534
2012-12-14 21:28:40	46.47	48.82	41257.9	5.85244		5.85244	-47.37	-49.7655
2012-12-14 21:38:40	46.56	48.94	41257.9	5.85938		5.85938	-47.4618	-49.8879
2012-12-14 21:48:40	46.7	49.04	41257.9	5.86633	41257.9	5.86633	-47.6045	-49.9898
2012-12-14 21:58:40	46.83	49.2	41257.9	5.87327		5.87327	-47.737	-50.1529
2012-12-14 22:08:40	46.94	49.31	41257.9	5.88022		5.88022	-47.8491	-50.265
2012-12-14 22:18:40	47.08	49.42	41257.9	5.88716		5.88716	-47.9918	-50.3772
2012-12-14 22:28:40	47.18	49.52	41257.9	5.8941		5.8941	-48.0938	-50.4791
2012-12-14 22:38:40	47.29	49.66	41257.9	5.90105		5.90105	-48.2059	-50.6218
2012-12-14 22:48:40	47.42	49.8	41258	5.90799	41258	5.90799	-48.3384	-50.7645
2012-12-14 22:58:40	47.54	49.9	41258	5.91494		5.91494	-48.4608	-50.8665
2012-12-14 23:08:40	47.66	50.02	41258	5.92188		5.92188	-48.5831	-50.9888
2012-12-14 23:18:40	47.74	50.11	41258	5.92883		5.92883	-48.6646	-51.0805
2012-12-14 23:28:40	47.85	50.23	41258	5.93577		5.93577	-48.7768	-51.2029
2012-12-14 23:38:40	47.97	50.33	41258	5.94272		5.94272	-48.8991	-51.3048
2012-12-14 23:48:40	48.07	50.44	41258	5.94966	41258	5.94966	-49.001	-51.4169
2012-12-14 23:58:40	48.18	50.55	41258	5.9566		5.9566	-49.1131	-51.5291
2012-12-15 00:08:40	48.28	50.65	41258	5.96355		5.96355	-49.2151	-51.631
2012-12-15 00:18:40	48.24	50.61	41258	5.97049		5.97049	-49.1743	-51.5902
2012-12-15 00:28:40	48.39	50.73	41258	5.97744		5.97744	-49.3272	-51.7125
2012-12-15 00:38:40	48.48	50.83	41258	5.98438		5.98438	-49.419	-51.8145
2012-12-15 00:48:40	48.59	50.94	41258	5.99133	41258	5.99133	-49.5311	-51.9266
2012-12-15 00:58:40	48.67	51.03	41258	5.99827		5.99827	-49.6126	-52.0183
2012-12-15 01:08:40	48.81	51.16	41258	6.00522		6.00522	-49.7554	-52.1509
2012-12-15 01:18:40	48.9	51.27	41258.1	6.01216		6.01216	-49.8471	-52.263
2012-12-15 01:28:40	49.02	51.38	41258.1	6.0191		6.0191	-49.9694	-52.3751
2012-12-15 01:38:40	49.14	51.48	41258.1	6.02605		6.02605	-50.0917	-52.4771
2012-12-15 01:48:40	49.22	51.6	41258.1	6.03299	41258.1	6.03299	-50.1733	-52.5994
2012-12-15 01:58:40	49.33	51.7	41258.1	6.03994		6.03994	-50.2854	-52.7013
2012-12-15 02:08:40	49.45	51.8	41258.1	6.04688		6.04688	-50.4077	-52.8033
2012-12-15 02:18:40	49.55	51.93	41258.1	6.05383		6.05383	-50.5097	-52.9358
2012-12-15 02:28:40	49.64	52.01	41258.1	6.06077		6.06077	-50.6014	-53.0173
2012-12-15 02:38:40	49.76	52.13	41258.1	6.06772		6.06772	-50.7238	-53.1397
2012-12-15 02:48:40	49.88	52.23	41258.1	6.07466	41258.1	6.07466	-50.8461	-53.2416
2012-12-15 02:58:40	49.96	52.33	41258.1	6.0816		6.0816	-50.9276	-53.3435
2012-12-15 03:08:40	50.08	52.44	41258.1	6.08855		6.08855	-51.0499	-53.4557
2012-12-15 03:18:40	50.18	52.53	41258.1	6.09549		6.09549	-51.1519	-53.5474
2012-12-15 03:28:40	50.3	52.68	41258.1	6.10244		6.10244	-51.2742	-53.7003
2012-12-15 03:38:40	50.38	52.75	41258.2	6.10938		6.10938	-51.3558	-53.7717
2012-12-15 03:48:40	50.5	52.85	41258.2	6.11633	41258.2	6.11633	-51.4781	-53.8736
2012-12-15 03:58:40	50.6	52.97	41258.2	6.12327		6.12327	-51.58	-53.9959
2012-12-15 04:08:40	50.69	53.06	41258.2	6.13022		6.13022	-51.6718	-54.0877
2012-12-15 04:18:40	50.82	53.19	41258.2	6.13716		6.13716	-51.8043	-54.2202
2012-12-15 04:28:40	50.94	53.3	41258.2	6.1441		6.1441	-51.9266	-54.3323
2012-12-15 04:38:40	51.06	53.43	41258.2	6.15105		6.15105	-52.0489	-54.4648
2012-12-15 04:48:40	51.17	53.52	41258.2	6.15799	41258.2	6.15799	-52.1611	-54.5566
2012-12-15 04:58:40	51.28	53.65	41258.2	6.16494		6.16494	-52.2732	-54.6891
2012-12-15 05:08:40	51.4	53.75	41258.2	6.17188		6.17188	-52.3955	-54.791
2012-12-15 05:18:40	51.51	53.89	41258.2	6.17883		6.17883	-52.5076	-54.9337
2012-12-15 05:28:40	51.62	53.98	41258.2	6.18577		6.18577	-52.6198	-55.0255
2012-12-15 05:38:40	51.73	54.1	41258.2	6.19272		6.19272	-52.7319	-55.1478
2012-12-15 05:48:40	51.85	54.22	41258.2	6.19966	41258.2	6.19966	-52.8542	-55.2701
2012-12-15 05:58:40	51.98	54.32	41258.2	6.2066		6.2066	-52.9867	-55.3721
2012-12-15 06:08:40	52.08	54.43	41258.3	6.21355		6.21355	-53.0887	-55.4842
2012-12-15 06:18:40	52.19	54.56	41258.3	6.22049		6.22049	-53.2008	-55.6167
2012-12-15 06:28:40	52.29	54.66	41258.3	6.22744		6.22744	-53.3028	-55.7187
2012-12-15 06:38:40	52.41	54.77	41258.3	6.23438		6.23438	-53.4251	-55.8308
2012-12-15 06:48:40	52.53	54.88	41258.3	6.24133	41258.3	6.24133	-53.5474	-55.9429
2012-12-15 06:58:40	52.64	55.01	41258.3	6.24827		6.24827	-53.6595	-56.0754
2012-12-15 07:08:40	52.76	55.11	41258.3	6.25522		6.25522	-53.7819	-56.1774
2012-12-15 07:18:40	52.88	55.24	41258.3	6.26216		6.26216	-53.9042	-56.3099
2012-12-15 07:28:40	52.98	55.35	41258.3	6.2691		6.2691	-54.0061	-56.422
2012-12-15 07:38:40	53.09	55.46	41258.3	6.27605		6.27605	-54.1182	-56.5341
2012-12-15 07:48:40	53.17	55.54	41258.3	6.28299	41258.3	6.28299	-54.1998	-56.6157
2012-12-15 07:58:40	53.29	55.66	41258.3	6.28994		6.28994	-54.3221	-56.738
2012-12-15 08:08:40	53.4	55.76	41258.3	6.29688		6.29688	-54.4343	-56.84
2012-12-15 08:18:40	53.49	55.86	41258.3	6.30383		6.30383	-54.526	-56.9419
2012-12-15 08:28:40	53.62	55.97	41258.4	6.31077		6.31077	-54.6585	-57.054
2012-12-15 08:38:40	53.72	56.08	41258.4	6.31772		6.31772	-54.7604	-57.1662
2012-12-15 08:48:40	53.82	56.18	41258.4	6.32466	41258.4	6.32466	-54.8624	-57.2681
2012-12-15 08:58:40	53.93	56.28	41258.4	6.3316		6.3316	-54.9745	-57.37
2012-12-15 09:08:40	54.07	56.42	41258.4	6.33855		6.33855	-55.1172	-57.5127
2012-12-15 09:18:40	54.18	56.53	41258.4	6.34549		6.34549	-55.2294	-57.6249
2012-12-15 09:28:40	54.3	56.66	41258.4	6.35244		6.35244	-55.3517	-57.7574
2012-12-15 09:38:40	54.41	56.77	41258.4	6.35938		6.35938	-55.4638	-57.8695
2012-12-15 09:48:40	54.54	56.9	41258.4	6.36633	41258.4	6.36633	-55.5963	-58.002
2012-12-15 09:58:40	54.66	57.02	41258.4	6.37327		6.37327	-55.7187	-58.1244
2012-12-15 10:08:40	54.75	57.11	41258.4	6.38022		6.38022	-55.8104	-58.2161
2012-12-15 10:18:40	54.85	57.19	41258.4	6.38716		6.38716	-55.9123	-58.2977
2012-12-15 10:28:40	54.93	57.29	41258.4	6.3941		6.3941	-55.9939	-58.3996
2012-12-15 10:38:40	55.06	57.41	41258.4	6.40105		6.40105	-56.1264	-58.5219
2012-12-15 10:48:40	55.17	57.54	41258.5	6.40799	41258.5	6.40799	-56.2385	-58.6544
2012-12-15 10:58:40	55.26	57.64	41258.5	6.41494		6.41494	-56.3303	-58.7564
2012-12-15 11:08:40	55.39	57.76	41258.5	6.42188		6.42188	-56.4628	-58.8787
2012-12-15 11:18:40	55.52	57.88	41258.5	6.42883		6.42883	-56.5953	-59.001
2012-12-15 11:28:40	55.6	57.96	41258.5	6.43577		6.43577	-56.6769	-59.0826
2012-12-15 11:38:40	55.7	58.04	41258.5	6.44272		6.44272	-56.7788	-59.1641
2012-12-15 11:48:40	55.81	58.2	41258.5	6.44966	41258.5	6.44966	-56.8909	-59.3272
2012-12-15 11:58:40	55.96	58.35	41258.5	6.4566		6.4566	-57.0438	-59.4801
2012-12-15 12:08:40	56.08	58.46	41258.5	6.46355		6.46355	-57.1662	-59.5923
2012-12-15 12:18:40	56.09	58.45	41258.5	6.47049		6.47049	-57.1764	-59.5821
2012-12-15 12:28:40	56.18	58.54	41258.5	6.47744		6.47744	-57.2681	-59.6738
2012-12-15 12:38:40	56.33	58.67	41258.5	6.48438		6.48438	-57.421	-59.8063
2012-12-15 12:48:40	56.41	58.75	41258.5	6.49133	41258.5	6.49133	-57.5025	-59.8879
2012-12-15 12:58:40	56.53	58.88	41258.5	6.49827		6.49827	-57.6249	-60.0204
2012-12-15 13:08:40	56.67	59.03	41258.5	6.50522		6.50522	-57.7676	-60.1733
2012-12-15 13:18:40	56.81	59.15	41258.6	6.51216		6.51216	-57.9103	-60.2956
2012-12-15 13:28:40	56.93	59.27	41258.6	6.5191		6.5191	-58.0326	-60.4179
2012-12-15 13:38:40	57.04	59.39	41258.6	6.52605		6.52605	-58.1448	-60.5403
2012-12-15 13:48:40	57.17	59.53	41258.6	6.53299	41258.6	6.53299	-58.2773	-60.683
2012-12-15 13:58:40	57.29	59.64	41258.6	6.53994		6.53994	-58.3996	-60.7951
2012-12-15 14:08:40	57.41	59.76	41258.6	6.54688		6.54688	-58.5219	-60.9174
2012-12-15 14:18:40	57.52	59.87	41258.6	6.55383		6.55383	-58.634	-61.0296
2012-12-15 14:28:40	57.64	59.98	41258.6	6.56077		6.56077	-58.7564	-61.1417
2012-12-15 14:38:40	57.8	60.13	41258.6	6.56772		6.56772	-58.9195	-61.2946
2012-12-15 14:48:40	57.91	60.26	41258.6	6.57466	41258.6	6.57466	-59.0316	-61.4271
2012-12-15 14:58:40	58.03	60.38	41258.6	6.5816		6.5816	-59.1539	-61.5494
2012-12-15 15:08:40	58.15	60.5	41258.6	6.58855		6.58855	-59.2762	-61.6718
2012-12-15 15:18:40	58.31	60.65	41258.6	6.59549		6.59549	-59.4393	-61.8247
2012-12-15 15:28:40	58.42	60.76	41258.6	6.60244		6.60244	-59.5515	-61.9368
2012-12-15 15:38:40	58.53	60.9	41258.7	6.60938		6.60938	-59.6636	-62.0795
2012-12-15 15:48:40	58.69	61.03	41258.7	6.61633	41258.7	6.61633	-59.8267	-62.212
2012-12-15 15:58:40	58.84	61.18	41258.7	6.62327		6.62327	-59.9796	-62.3649
2012-12-15 16:08:40	58.94	61.3	41258.7	6.63022		6.63022	-60.0815	-62.4873
2012-12-15 16:18:40	59.07	61.43	41258.7	6.63716		6.63716	-60.2141	-62.6198
2012-12-15 16:28:40	59.23	61.58	41258.7	6.6441		6.6441	-60.3772	-62.7727
2012-12-15 16:38:40	59.35	61.7	41258.7	6.65105		6.65105	-60.4995	-62.895
2012-12-15 16:48:40	59.49	61.84	41258.7	6.65799	41258.7	6.65799	-60.6422	-63.0377
2012-12-15 16:58:40	59.63	61.98	41258.7	6.66494		6.66494	-60.7849	-63.1804
2012-12-15 17:08:40	59.75	62.11	41258.7	6.67188		6.67188	-60.9072	-63.3129
2012-12-15 17:18:40	59.89	62.25	41258.7	6.67883		6.67883	-61.0499	-63.4557
2012-12-15 17:28:40	60.05	62.4	41258.7	6.68577		6.68577	-61.213	-63.6086
2012-12-15 17:38:40	60.18	62.55	41258.7	6.69272		6.69272	-61.3456	-63.7615
2012-12-15 17:48:40	60.32	62.67	41258.7	6.69966	41258.7	6.69966	-61.4883	-63.8838
2012-12-15 17:58:40	60.44	62.8	41258.7	6.7066		6.7066	-61.6106	-64.0163
2012-12-15 18:08:40	60.59	62.95	41258.8	6.71355		6.71355	-61.7635	-64.1692
2012-12-15 18:18:40	60.71	63.09	41258.8	6.72049		6.72049	-61.8858	-64.3119
2012-12-15 18:28:40	60.9	63.26	41258.8	6.72744		6.72744	-62.0795	-64.4852
2012-12-15 18:38:40	61.08	63.43	41258.8	6.73438		6.73438	-62.263	-64.6585
2012-12-15 18:48:40	61.22	63.59	41258.8	6.74133	41258.8	6.74133	-62.4057	-64.8216
2012-12-15 18:58:40	61.38	63.74	41258.8	6.74827		6.74827	-62.5688	-64.9745
2012-12-15 19:08:40	61.54	63.89	41258.8	6.75522		6.75522	-62.7319	-65.1274
2012-12-15 19:18:40	61.72	64.08	41258.8	6.76216		6.76216	-62.9154	-65.3211
2012-12-15 19:28:40	61.89	64.25	41258.8	6.7691		6.7691	-63.0887	-65.4944
2012-12-15 19:38:40	62.05	64.4	41258.8	6.77605		6.77605	-63.2518	-65.6473
2012-12-15 19:48:40	62.21	64.58	41258.8	6.78299	41258.8	6.78299	-63.4149	-65.8308
2012-12-15 19:58:40	62.36	64.74	41258.8	6.78994		6.78994	-63.5678	-65.9939
2012-12-15 20:08:40	62.54	64.89	41258.8	6.79688		6.79688	-63.7513	-66.1468
2012-12-15 20:18:40	62.69	65.03	41258.8	6.80383		6.80383	-63.9042	-66.2895
2012-12-15 20:28:40	62.85	65.22	41258.9	6.81077		6.81077	-64.0673	-66.4832
2012-12-15 20:38:40	63.04	65.39	41258.9	6.81772		6.81772	-64.261	-66.6565
2012-12-15 20:48:40	63.19	65.55	41258.9	6.82466	41258.9	6.82466	-64.4139	-66.8196
2012-12-15 20:58:40	63.38	65.67	41258.9	6.8316		6.8316	-64.6075	-66.9419
2012-12-15 21:08:40	63.53	65.87	41258.9	6.83855		6.83855	-64.7604	-67.1458
2012-12-15 21:18:40	63.69	66.03	41258.9	6.84549		6.84549	-64.9235	-67.3089
2012-12-15 21:28:40	63.84	66.16	41258.9	6.85244		6.85244	-65.0765	-67.4414
2012-12-15 21:38:40	64	66.33	41258.9	6.85938		6.85938	-65.2396	-67.6147
2012-12-15 21:48:40	64.18	66.52	41258.9	6.86633	41258.9	6.86633	-65.423	-67.8084
2012-12-15 21:58:40	64.35	66.69	41258.9	6.87327		6.87327	-65.5963	-67.9817
2012-12-15 22:08:40	64.54	66.9	41258.9	6.88022		6.88022	-65.79	-68.1957
2012-12-15 22:18:40	64.71	67.07	41258.9	6.88716		6.88716	-65.9633	-68.369
2012-12-15 22:28:40	64.87	67.21	41258.9	6.8941		6.8941	-66.1264	-68.5117
2012-12-15 22:38:40	65.06	67.41	41258.9	6.90105		6.90105	-66.3201	-68.7156
2012-12-15 22:48:40	65.21	67.53	41259	6.90799	41259	6.90799	-66.473	-68.8379
2012-12-15 22:58:40	65.37	67.72	41259	6.91494		6.91494	-66.6361	-69.0316
2012-12-15 23:08:40	65.51	67.83	41259	6.92188		6.92188	-66.7788	-69.1437
2012-12-15 23:18:40	65.67	68.02	41259	6.92883		6.92883	-66.9419	-69.3374
2012-12-15 23:28:40	65.85	68.2	41259	6.93577		6.93577	-67.1254	-69.5209
2012-12-15 23:38:40	66.04	68.37	41259	6.94272		6.94272	-67.3191	-69.6942
2012-12-15 23:48:40	66.19	68.55	41259	6.94966	41259	6.94966	-67.472	-69.8777
2012-12-15 23:58:40	66.35	68.68	41259	6.9566		6.9566	-67.6351	-70.0102
2012-12-16 00:08:40	66.47	68.83	41259	6.96355		6.96355	-67.7574	-70.1631
2012-12-16 00:18:40	66.66	69.03	41259	6.97049		6.97049	-67.9511	-70.367
2012-12-16 00:28:40	66.83	69.18	41259	6.97744		6.97744	-68.1244	-70.5199
2012-12-16 00:38:40	67	69.37	41259	6.98438		6.98438	-68.2977	-70.7136
2012-12-16 00:48:40	67.18	69.54	41259	6.99133	41259	6.99133	-68.4811	-70.8869
2012-12-16 00:58:40	67.37	69.72	41259	6.99827		6.99827	-68.6748	-71.0703
2012-12-16 01:08:40	67.53	69.9	41259	7.00522		7.00522	-68.8379	-71.2538
2012-12-16 01:18:40	67.73	70.08	41259.1	7.01216		7.01216	-69.0418	-71.4373
2012-12-16 01:28:40	67.89	70.23	41259.1	7.0191		7.0191	-69.2049	-71.5902
2012-12-16 01:38:40	68.04	70.4	41259.1	7.02605		7.02605	-69.3578	-71.7635
2012-12-16 01:48:40	68.21	70.57	41259.1	7.03299	41259.1	7.03299	-69.5311	-71.9368
2012-12-16 01:58:40	68.39	70.76	41259.1	7.03994		7.03994	-69.7146	-72.1305
2012-12-16 02:08:40	68.57	70.92	41259.1	7.04688		7.04688	-69.8981	-72.2936
2012-12-16 02:18:40	68.77	71.13	41259.1	7.05383		7.05383	-70.1019	-72.5076
2012-12-16 02:28:40	68.91	71.27	41259.1	7.06077		7.06077	-70.2446	-72.6504
2012-12-16 02:38:40	69.11	71.45	41259.1	7.06772		7.06772	-70.4485	-72.8338
2012-12-16 02:48:40	69.27	71.64	41259.1	7.07466	41259.1	7.07466	-70.6116	-73.0275
2012-12-16 02:58:40	69.48	71.83	41259.1	7.0816		7.0816	-70.8257	-73.2212
2012-12-16 03:08:40	69.66	72.02	41259.1	7.08855		7.08855	-71.0092	-73.4149
2012-12-16 03:18:40	69.84	72.19	41259.1	7.09549		7.09549	-71.1927	-73.5882
2012-12-16 03:28:40	70.02	72.38	41259.1	7.10244		7.10244	-71.3761	-73.7819
2012-12-16 03:38:40	70.21	72.53	41259.2	7.10938		7.10938	-71.5698	-73.9348
2012-12-16 03:48:40	70.39	72.75	41259.2	7.11633	41259.2	7.11633	-71.7533	-74.159
2012-12-16 03:58:40	70.6	72.96	41259.2	7.12327		7.12327	-71.9674	-74.3731
2012-12-16 04:08:40	70.77	73.13	41259.2	7.13022		7.13022	-72.1407	-74.5464
2012-12-16 04:18:40	70.94	73.3	41259.2	7.13716		7.13716	-72.314	-74.7197
2012-12-16 04:28:40	71.12	73.48	41259.2	7.1441		7.1441	-72.4975	-74.9032
2012-12-16 04:38:40	71.29	73.65	41259.2	7.15105		7.15105	-72.6707	-75.0765
2012-12-16 04:48:40	71.46	73.83	41259.2	7.15799	41259.2	7.15799	-72.844	-75.2599
2012-12-16 04:58:40	71.64	74.01	41259.2	7.16494		7.16494	-73.0275	-75.4434
2012-12-16 05:08:40	71.81	74.18	41259.2	7.17188		7.17188	-73.2008	-75.6167
2012-12-16 05:18:40	71.99	74.35	41259.2	7.17883		7.17883	-73.3843	-75.79
2012-12-16 05:28:40	72.16	74.52	41259.2	7.18577		7.18577	-73.5576	-75.9633
2012-12-16 05:38:40	72.33	74.7	41259.2	7.19272		7.19272	-73.7309	-76.1468
2012-12-16 05:48:40	72.54	74.88	41259.2	7.19966	41259.2	7.19966	-73.945	-76.3303
2012-12-16 05:58:40	72.7	75.07	41259.2	7.2066		7.2066	-74.1081	-76.524
2012-12-16 06:08:40	72.88	75.27	41259.3	7.21355		7.21355	-74.2915	-76.7278
2012-12-16 06:18:40	73.08	75.45	41259.3	7.22049		7.22049	-74.4954	-76.9113
2012-12-16 06:28:40	73.24	75.61	41259.3	7.22744		7.22744	-74.6585	-77.0744
2012-12-16 06:38:40	73.43	75.8	41259.3	7.23438		7.23438	-74.8522	-77.2681
2012-12-16 06:48:40	73.59	75.96	41259.3	7.24133	41259.3	7.24133	-75.0153	-77.4312
2012-12-16 06:58:40	73.77	76.18	41259.3	7.24827		7.24827	-75.1988	-77.6555
2012-12-16 07:08:40	73.96	76.34	41259.3	7.25522		7.25522	-75.3925	-77.8186
2012-12-16 07:18:40	74.15	76.52	41259.3	7.26216		7.26216	-75.5861	-78.002
2012-12-16 07:28:40	74.35	76.72	41259.3	7.2691		7.2691	-75.79	-78.2059
2012-12-16 07:38:40	74.5	76.88	41259.3	7.27605		7.27605	-75.9429	-78.369
2012-12-16 07:48:40	74.67	77.05	41259.3	7.28299	41259.3	7.28299	-76.1162	-78.5423
2012-12-16 07:58:40	74.87	77.25	41259.3	7.28994		7.28994	-76.3201	-78.7462
2012-12-16 08:08:40	75.02	77.4	41259.3	7.29688		7.29688	-76.473	-78.8991
2012-12-16 08:18:40	75.19	77.57	41259.3	7.30383		7.30383	-76.6463	-79.0724
2012-12-16 08:28:40	75.36	77.75	41259.4	7.31077		7.31077	-76.8196	-79.2559
2012-12-16 08:38:40	75.52	77.91	41259.4	7.31772		7.31772	-76.9827	-79.419
2012-12-16 08:48:40	75.69	78.06	41259.4	7.32466	41259.4	7.32466	-77.156	-79.5719
2012-12-16 08:58:40	75.86	78.25	41259.4	7.3316		7.3316	-77.3293	-79.7655
2012-12-16 09:08:40	76.06	78.44	41259.4	7.33855		7.33855	-77.5331	-79.9592
2012-12-16 09:18:40	76.25	78.64	41259.4	7.34549		7.34549	-77.7268	-80.1631
2012-12-16 09:28:40	76.44	78.81	41259.4	7.35244		7.35244	-77.9205	-80.3364
2012-12-16 09:38:40	76.6	78.98	41259.4	7.35938		7.35938	-78.0836	-80.5097
2012-12-16 09:48:40	76.77	79.16	41259.4	7.36633	41259.4	7.36633	-78.2569	-80.6932
2012-12-16 09:58:40	76.97	79.37	41259.4	7.37327		7.37327	-78.4608	-80.9072
2012-12-16 10:08:40	77.17	79.55	41259.4	7.38022		7.38022	-78.6646	-81.0907
2012-12-16 10:18:40	77.33	79.73	41259.4	7.38716		7.38716	-78.8277	-81.2742
2012-12-16 10:28:40	77.51	79.92	41259.4	7.3941		7.3941	-79.0112	-81.4679
2012-12-16 10:38:40	77.69	80.04	41259.4	7.40105		7.40105	-79.1947	-81.5902
2012-12-16 10:48:40	77.87	80.24	41259.5	7.40799	41259.5	7.40799	-79.3782	-81.7941
2012-12-16 10:58:40	78.07	80.46	41259.5	7.41494		7.41494	-79.5821	-82.0183
2012-12-16 11:08:40	78.24	80.63	41259.5	7.42188		7.42188	-79.7554	-82.1916
2012-12-16 11:18:40	78.43	80.81	41259.5	7.42883		7.42883	-79.949	-82.3751
2012-12-16 11:28:40	78.6	80.95	41259.5	7.43577		7.43577	-80.1223	-82.5178
2012-12-16 11:38:40	78.77	81.13	41259.5	7.44272		7.44272	-80.2956	-82.7013
2012-12-16 11:48:40	78.95	81.32	41259.5	7.44966	41259.5	7.44966	-80.4791	-82.895
2012-12-16 11:58:40	79.11	81.49	41259.5	7.4566		7.4566	-80.6422	-83.0683
2012-12-16 12:08:40	79.33	81.72	41259.5	7.46355		7.46355	-80.8665	-83.3028
2012-12-16 12:18:40	79.53	81.91	41259.5	7.47049		7.47049	-81.0703	-83.4964
2012-12-16 12:28:40	79.7	82.09	41259.5	7.47744		7.47744	-81.2436	-83.6799
2012-12-16 12:38:40	79.87	82.26	41259.5	7.48438		7.48438	-81.4169	-83.8532
2012-12-16 12:48:40	80	82.43	41259.5	7.49133	41259.5	7.49133	-81.5494	-84.0265
2012-12-16 12:58:40	80.24	82.62	41259.5	7.49827		7.49827	-81.7941	-84.2202
2012-12-16 13:08:40	80.42	82.82	41259.5	7.50522		7.50522	-81.9776	-84.4241
2012-12-16 13:18:40	80.61	83	41259.6	7.51216		7.51216	-82.1713	-84.6075
2012-12-16 13:28:40	80.79	83.2	41259.6	7.5191		7.5191	-82.3547	-84.8114
2012-12-16 13:38:40	81	83.39	41259.6	7.52605		7.52605	-82.5688	-85.0051
2012-12-16 13:48:40	81.19	83.55	41259.6	7.53299	41259.6	7.53299	-82.7625	-85.1682
2012-12-16 13:58:40	81.38	83.77	41259.6	7.53994		7.53994	-82.9562	-85.3925
2012-12-16 14:08:40	81.57	83.96	41259.6	7.54688		7.54688	-83.1498	-85.5861
2012-12-16 14:18:40	81.79	84.18	41259.6	7.55383		7.55383	-83.3741	-85.8104
2012-12-16 14:28:40	81.99	84.39	41259.6	7.56077		7.56077	-83.578	-86.0245
2012-12-16 14:38:40	82.2	84.6	41259.6	7.56772		7.56772	-83.792	-86.2385
2012-12-16 14:48:40	82.39	84.83	41259.6	7.57466	41259.6	7.57466	-83.9857	-86.473
2012-12-16 14:58:40	82.64	85.06	41259.6	7.5816		7.5816	-84.2406	-86.7074
2012-12-16 15:08:40	82.86	85.28	41259.6	7.58855		7.58855	-84.4648	-86.9317
2012-12-16 15:18:40	83.06	85.46	41259.6	7.59549		7.59549	-84.6687	-87.1152
2012-12-16 15:28:40	83.25	85.65	41259.6	7.60244		7.60244	-84.8624	-87.3089
2012-12-16 15:38:40	83.48	85.89	41259.7	7.60938		7.60938	-85.0968	-87.5535
2012-12-16 15:48:40	83.66	86.08	41259.7	7.61633	41259.7	7.61633	-85.2803	-87.7472
2012-12-16 15:58:40	83.85	86.28	41259.7	7.62327		7.62327	-85.474	-87.9511
2012-12-16 16:08:40	84.03	86.46	41259.7	7.63022		7.63022	-85.6575	-88.1346
2012-12-16 16:18:40	84.23	86.64	41259.7	7.63716		7.63716	-85.8614	-88.318
2012-12-16 16:28:40	84.43	86.87	41259.7	7.6441		7.6441	-86.0652	-88.5525
2012-12-16 16:38:40	84.61	87.05	41259.7	7.65105		7.65105	-86.2487	-88.736
2012-12-16 16:48:40	84.83	87.26	41259.7	7.65799	41259.7	7.65799	-86.473	-88.9501
2012-12-16 16:58:40	85.05	87.47	41259.7	7.66494		7.66494	-86.6972	-89.1641
2012-12-16 17:08:40	85.27	87.69	41259.7	7.67188		7.67188	-86.9215	-89.3884
2012-12-16 17:18:40	85.48	87.91	41259.7	7.67883		7.67883	-87.1356	-89.6126
2012-12-16 17:28:40	85.69	88.12	41259.7	7.68577		7.68577	-87.3496	-89.8267
2012-12-16 17:38:40	85.93	88.36	41259.7	7.69272		7.69272	-87.5943	-90.0714
2012-12-16 17:48:40	86.13	88.56	41259.7	7.69966	41259.7	7.69966	-87.7982	-90.2752
2012-12-16 17:58:40	86.35	88.8	41259.7	7.7066		7.7066	-88.0224	-90.5199
2012-12-16 18:08:40	86.61	89.02	41259.8	7.71355		7.71355	-88.2875	-90.7441
2012-12-16 18:18:40	86.8	89.24	41259.8	7.72049		7.72049	-88.4811	-90.9684
2012-12-16 18:28:40	87.07	89.5	41259.8	7.72744		7.72744	-88.7564	-91.2334
2012-12-16 18:38:40	87.26	89.7	41259.8	7.73438		7.73438	-88.9501	-91.4373
2012-12-16 18:48:40	87.5	89.92	41259.8	7.74133	41259.8	7.74133	-89.1947	-91.6616
2012-12-16 18:58:40	87.73	90.17	41259.8	7.74827		7.74827	-89.4292	-91.9164
2012-12-16 19:08:40	87.95	90.4	41259.8	7.75522		7.75522	-89.6534	-92.1509
2012-12-16 19:18:40	88.18	90.63	41259.8	7.76216		7.76216	-89.8879	-92.3853
2012-12-16 19:28:40	88.4	90.82	41259.8	7.7691		7.7691	-90.1121	-92.579
2012-12-16 19:38:40	88.62	91.05	41259.8	7.77605		7.77605	-90.3364	-92.8135
2012-12-16 19:48:40	88.87	91.31	41259.8	7.78299	41259.8	7.78299	-90.5912	-93.0785
2012-12-16 19:58:40	88.94	91.35	41259.8	7.78994		7.78994	-90.6626	-93.1193
2012-12-16 20:08:40	89.18	91.6	41259.8	7.79688		7.79688	-90.9072	-93.3741
2012-12-16 20:18:40	89.41	91.84	41259.8	7.80383		7.80383	-91.1417	-93.6188
2012-12-16 20:28:40	89.65	92.08	41259.9	7.81077		7.81077	-91.3863	-93.8634
2012-12-16 20:38:40	89.89	92.32	41259.9	7.81772		7.81772	-91.631	-94.1081
2012-12-16 20:48:40	90.1	92.54	41259.9	7.82466	41259.9	7.82466	-91.8451	-94.3323
2012-12-16 20:58:40	90.34	92.78	41259.9	7.8316		7.8316	-92.0897	-94.577
2012-12-16 21:08:40	90.58	93	41259.9	7.83855		7.83855	-92.3344	-94.8012
2012-12-16 21:18:40	90.78	93.23	41259.9	7.84549		7.84549	-92.5382	-95.0357
2012-12-16 21:28:40	91.05	93.49	41259.9	7.85244		7.85244	-92.8135	-95.3007
2012-12-16 21:38:40	91.29	93.72	41259.9	7.85938		7.85938	-93.0581	-95.5352
2012-12-16 21:48:40	91.51	93.97	41259.9	7.86633	41259.9	7.86633	-93.2824	-95.79
2012-12-16 21:58:40	91.77	94.21	41259.9	7.87327		7.87327	-93.5474	-96.0347
2012-12-16 22:08:40	92.01	94.46	41259.9	7.88022		7.88022	-93.792	-96.2895
2012-12-16 22:18:40	92.27	94.7	41259.9	7.88716		7.88716	-94.0571	-96.5341
2012-12-16 22:28:40	92.5	94.94	41259.9	7.8941		7.8941	-94.2915	-96.7788
2012-12-16 22:38:40	92.78	95.22	41259.9	7.90105		7.90105	-94.577	-97.0642
2012-12-16 22:48:40	93.01	95.47	41260	7.90799	41260	7.90799	-94.8114	-97.3191
2012-12-16 22:58:40	93.24	95.7	41260	7.91494		7.91494	-95.0459	-97.5535
2012-12-16 23:08:40	93.49	95.96	41260	7.92188		7.92188	-95.3007	-97.8186
2012-12-16 23:18:40	93.72	96.16	41260	7.92883		7.92883	-95.5352	-98.0224
2012-12-16 23:28:40	93.88	96.34	41260	7.93577		7.93577	-95.6983	-98.2059
2012-12-16 23:38:40	94.18	96.61	41260	7.94272		7.94272	-96.0041	-98.4811
2012-12-16 23:48:40	94.4	96.85	41260	7.94966	41260	7.94966	-96.2283	-98.7258
2012-12-16 23:58:40	94.68	97.11	41260	7.9566		7.9566	-96.5138	-98.9908
2012-12-17 00:08:40	94.91	97.36	41260	7.96355		7.96355	-96.7482	-99.2457
2012-12-17 00:18:40	95.19	97.64	41260	7.97049		7.97049	-97.0336	-99.5311
2012-12-17 00:28:40	95.44	97.9	41260	7.97744		7.97744	-97.2885	-99.7961
2012-12-17 00:38:40	95.66	98.11	41260	7.98438		7.98438	-97.5127	-100.01
2012-12-17 00:48:40	95.93	98.4	41260	7.99133	41260	7.99133	-97.788	-100.306
2012-12-17 00:58:40	96.17	98.63	41260	7.99827		7.99827	-98.0326	-100.54
2012-12-17 01:08:40	96.43	98.9	41260	8.00522		8.00522	-98.2977	-100.815
2012-12-17 01:18:40	96.66	99.14	41260.1	8.01216		8.01216	-98.5321	-101.06
2012-12-17 01:28:40	96.91	99.37	41260.1	8.0191		8.0191	-98.787	-101.295
2012-12-17 01:38:40	97.16	99.59	41260.1	8.02605		8.02605	-99.0418	-101.519
2012-12-17 01:48:40	97.4	99.86	41260.1	8.03299	41260.1	8.03299	-99.2864	-101.794
2012-12-17 01:58:40	97.64	100.1	41260.1	8.03994		8.03994	-99.5311	-102.039
2012-12-17 02:08:40	97.91	100.34	41260.1	8.04688		8.04688	-99.8063	-102.283
2012-12-17 02:18:40	98.16	100.64	41260.1	8.05383		8.05383	-100.061	-102.589
2012-12-17 02:28:40	98.4	100.89	41260.1	8.06077		8.06077	-100.306	-102.844
2012-12-17 02:38:40	98.7	101.2	41260.1	8.06772		8.06772	-100.612	-103.16
2012-12-17 02:48:40	98.94	101.41	41260.1	8.07466	41260.1	8.07466	-100.856	-103.374
2012-12-17 02:58:40	99.2	101.7	41260.1	8.0816		8.0816	-101.121	-103.67
2012-12-17 03:08:40	99.49	101.95	41260.1	8.08855		8.08855	-101.417	-103.925
2012-12-17 03:18:40	99.74	102.25	41260.1	8.09549		8.09549	-101.672	-104.23
2012-12-17 03:28:40	100.05	102.55	41260.1	8.10244		8.10244	-101.988	-104.536
2012-12-17 03:38:40	100.32	102.8	41260.2	8.10938		8.10938	-102.263	-104.791
2012-12-17 03:48:40	100.61	103.1	41260.2	8.11633	41260.2	8.11633	-102.559	-105.097
2012-12-17 03:58:40	100.88	103.36	41260.2	8.12327		8.12327	-102.834	-105.362
2012-12-17 04:08:40	101.14	103.62	41260.2	8.13022		8.13022	-103.099	-105.627
2012-12-17 04:18:40	101.42	103.89	41260.2	8.13716		8.13716	-103.384	-105.902
2012-12-17 04:28:40	101.66	104.1	41260.2	8.1441		8.1441	-103.629	-106.116
2012-12-17 04:38:40	101.9	104.39	41260.2	8.15105		8.15105	-103.874	-106.412
2012-12-17 04:48:40	102.12	104.58	41260.2	8.15799	41260.2	8.15799	-104.098	-106.606
2012-12-17 04:58:40	102.36	104.87	41260.2	8.16494		8.16494	-104.343	-106.901
2012-12-17 05:08:40	102.64	105.16	41260.2	8.17188		8.17188	-104.628	-107.197
2012-12-17 05:18:40	102.93	105.44	41260.2	8.17883		8.17883	-104.924	-107.482
2012-12-17 05:28:40	103.2	105.7	41260.2	8.18577		8.18577	-105.199	-107.747
2012-12-17 05:38:40	103.47	105.99	41260.2	8.19272		8.19272	-105.474	-108.043
2012-12-17 05:48:40	103.76	106.27	41260.2	8.19966	41260.2	8.19966	-105.77	-108.328
2012-12-17 05:58:40	104.05	106.56	41260.2	8.2066		8.2066	-106.065	-108.624
2012-12-17 06:08:40	104.32	106.84	41260.3	8.21355		8.21355	-106.34	-108.909
2012-12-17 06:18:40	104.6	107.12	41260.3	8.22049		8.22049	-106.626	-109.195
2012-12-17 06:28:40	104.92	107.46	41260.3	8.22744		8.22744	-106.952	-109.541
2012-12-17 06:38:40	105.14	107.73	41260.3	8.23438		8.23438	-107.176	-109.817
2012-12-17 06:48:40	105.49	108.04	41260.3	8.24133	41260.3	8.24133	-107.533	-110.133
2012-12-17 06:58:40	105.8	108.38	41260.3	8.24827		8.24827	-107.849	-110.479
2012-12-17 07:08:40	106.13	108.67	41260.3	8.25522		8.25522	-108.186	-110.775
2012-12-17 07:18:40	106.4	108.96	41260.3	8.26216		8.26216	-108.461	-111.07
2012-12-17 07:28:40	106.71	109.24	41260.3	8.2691		8.2691	-108.777	-111.356
2012-12-17 07:38:40	107.02	109.59	41260.3	8.27605		8.27605	-109.093	-111.713
2012-12-17 07:48:40	107.36	109.89	41260.3	8.28299	41260.3	8.28299	-109.439	-112.018
2012-12-17 07:58:40	107.63	110.19	41260.3	8.28994		8.28994	-109.715	-112.324
2012-12-17 08:08:40	107.94	110.52	41260.3	8.29688		8.29688	-110.031	-112.661
2012-12-17 08:18:40	108.26	110.82	41260.3	8.30383		8.30383	-110.357	-112.966
2012-12-17 08:28:40	108.59	111.15	41260.4	8.31077		8.31077	-110.693	-113.303
2012-12-17 08:38:40	108.89	111.48	41260.4	8.31772		8.31772	-110.999	-113.639
2012-12-17 08:48:40	109.2	111.77	41260.4	8.32466	41260.4	8.32466	-111.315	-113.935
2012-12-17 08:58:40	109.5	112.07	41260.4	8.3316		8.3316	-111.621	-114.241
2012-12-17 09:08:40	109.78	112.38	41260.4	8.33855		8.33855	-111.906	-114.557
2012-12-17 09:18:40	110.1	112.68	41260.4	8.34549		8.34549	-112.232	-114.862
2012-12-17 09:28:40	110.43	113.03	41260.4	8.35244		8.35244	-112.569	-115.219
2012-12-17 09:38:40	110.76	113.37	41260.4	8.35938		8.35938	-112.905	-115.566
2012-12-17 09:48:40	111.07	113.68	41260.4	8.36633	41260.4	8.36633	-113.221	-115.882
2012-12-17 09:58:40	111.34	113.99	41260.4	8.37327		8.37327	-113.496	-116.198
2012-12-17 10:08:40	111.68	114.32	41260.4	8.38022		8.38022	-113.843	-116.534
2012-12-17 10:18:40	112	114.61	41260.4	8.38716		8.38716	-114.169	-116.83
2012-12-17 10:28:40	112.28	114.9	41260.4	8.3941		8.3941	-114.455	-117.125
2012-12-17 10:38:40	112.59	115.22	41260.4	8.40105		8.40105	-114.771	-117.452
2012-12-17 10:48:40	112.89	115.53	41260.5	8.40799	41260.5	8.40799	-115.076	-117.768
2012-12-17 10:58:40	112.9	115.54	41260.5	8.41494		8.41494	-115.087	-117.778
2012-12-17 11:08:40	113.35	116.07	41260.5	8.42188		8.42188	-115.545	-118.318
2012-12-17 11:18:40	113.75	116.46	41260.5	8.42883		8.42883	-115.953	-118.716
2012-12-17 11:28:40	114.06	116.73	41260.5	8.43577		8.43577	-116.269	-118.991
2012-12-17 11:38:40	114.37	117.02	41260.5	8.44272		8.44272	-116.585	-119.286
2012-12-17 11:48:40	114.65	117.31	41260.5	8.44966	41260.5	8.44966	-116.871	-119.582
2012-12-17 11:58:40	114.99	117.62	41260.5	8.4566		8.4566	-117.217	-119.898
2012-12-17 12:08:40	115.26	117.91	41260.5	8.46355		8.46355	-117.492	-120.194
2012-12-17 12:18:40	115.59	118.25	41260.5	8.47049		8.47049	-117.829	-120.54
2012-12-17 12:28:40	115.9	118.51	41260.5	8.47744		8.47744	-118.145	-120.805
2012-12-17 12:38:40	116.23	118.88	41260.5	8.48438		8.48438	-118.481	-121.182
2012-12-17 12:48:40	116.57	119.21	41260.5	8.49133	41260.5	8.49133	-118.828	-121.519
2012-12-17 12:58:40	116.87	119.51	41260.5	8.49827		8.49827	-119.134	-121.825
2012-12-17 13:08:40	117.21	119.84	41260.5	8.50522		8.50522	-119.48	-122.161
2012-12-17 13:18:40	117.5	120.18	41260.6	8.51216		8.51216	-119.776	-122.508
2012-12-17 13:28:40	117.84	120.53	41260.6	8.5191		8.5191	-120.122	-122.864
2012-12-17 13:38:40	118.14	120.78	41260.6	8.52605		8.52605	-120.428	-123.119
2012-12-17 13:48:40	118.44	121.11	41260.6	8.53299	41260.6	8.53299	-120.734	-123.456
2012-12-17 13:58:40	118.76	121.46	41260.6	8.53994		8.53994	-121.06	-123.812
2012-12-17 14:08:40	119.06	121.77	41260.6	8.54688		8.54688	-121.366	-124.128
2012-12-17 14:18:40	119.38	122.08	41260.6	8.55383		8.55383	-121.692	-124.444
2012-12-17 14:28:40	119.71	122.43	41260.6	8.56077		8.56077	-122.029	-124.801
2012-12-17 14:38:40	120	122.73	41260.6	8.56772		8.56772	-122.324	-125.107
2012-12-17 14:48:40	120.29	122.98	41260.6	8.57466	41260.6	8.57466	-122.62	-125.362
2012-12-17 14:58:40	120.57	123.29	41260.6	8.5816		8.5816	-122.905	-125.678
2012-12-17 15:08:40	120.89	123.59	41260.6	8.58855		8.58855	-123.231	-125.984
2012-12-17 15:18:40	121.2	123.9	41260.6	8.59549		8.59549	-123.547	-126.3
2012-12-17 15:28:40	121.52	124.22	41260.6	8.60244		8.60244	-123.874	-126.626
2012-12-17 15:38:40	121.85	124.56	41260.7	8.60938		8.60938	-124.21	-126.972
2012-12-17 15:48:40	122.07	124.78	41260.7	8.61633	41260.7	8.61633	-124.434	-127.197
2012-12-17 15:58:40	122.38	125.09	41260.7	8.62327		8.62327	-124.75	-127.513
2012-12-17 16:08:40	122.69	125.4	41260.7	8.63022		8.63022	-125.066	-127.829
2012-12-17 16:18:40	123.01	125.73	41260.7	8.63716		8.63716	-125.392	-128.165
2012-12-17 16:28:40	123.31	125.99	41260.7	8.6441		8.6441	-125.698	-128.43
2012-12-17 16:38:40	123.58	126.26	41260.7	8.65105		8.65105	-125.973	-128.705
2012-12-17 16:48:40	123.88	126.61	41260.7	8.65799	41260.7	8.65799	-126.279	-129.062
2012-12-17 16:58:40	124.2	126.9	41260.7	8.66494		8.66494	-126.606	-129.358
2012-12-17 17:08:40	124.49	127.21	41260.7	8.67188		8.67188	-126.901	-129.674
2012-12-17 17:18:40	124.78	127.52	41260.7	8.67883		8.67883	-127.197	-129.99
2012-12-17 17:28:40	125	127.74	41260.7	8.68577		8.68577	-127.421	-130.214
2012-12-17 17:38:40	125.32	128.04	41260.7	8.69272		8.69272	-127.747	-130.52
2012-12-17 17:48:40	125.6	128.35	41260.7	8.69966	41260.7	8.69966	-128.033	-130.836
2012-12-17 17:58:40	125.9	128.66	41260.7	8.7066		8.7066	-128.338	-131.152
2012-12-17 18:08:40	126.22	128.96	41260.8	8.71355		8.71355	-128.665	-131.458
2012-12-17 18:18:40	126.52	129.28	41260.8	8.72049		8.72049	-128.97	-131.784
2012-12-17 18:28:40	126.79	129.53	41260.8	8.72744		8.72744	-129.246	-132.039
2012-12-17 18:38:40	127.08	129.87	41260.8	8.73438		8.73438	-129.541	-132.385
2012-12-17 18:48:40	127.36	130.14	41260.8	8.74133	41260.8	8.74133	-129.827	-132.661
2012-12-17 18:58:40	127.65	130.42	41260.8	8.74827		8.74827	-130.122	-132.946
2012-12-17 19:08:40	127.95	130.78	41260.8	8.75522		8.75522	-130.428	-133.313
2012-12-17 19:18:40	128.28	131.11	41260.8	8.76216		8.76216	-130.765	-133.649
2012-12-17 19:28:40	128.57	131.36	41260.8	8.7691		8.7691	-131.06	-133.904
2012-12-17 19:38:40	128.85	131.68	41260.8	8.77605		8.77605	-131.346	-134.23
2012-12-17 19:48:40	129.15	132	41260.8	8.78299	41260.8	8.78299	-131.651	-134.557
2012-12-17 19:58:40	129.45	132.3	41260.8	8.78994		8.78994	-131.957	-134.862
2012-12-17 20:08:40	129.74	132.59	41260.8	8.79688		8.79688	-132.253	-135.158
2012-12-17 20:18:40	130.03	132.9	41260.8	8.80383		8.80383	-132.548	-135.474
2012-12-17 20:28:40	130.32	133.19	41260.9	8.81077		8.81077	-132.844	-135.77
2012-12-17 20:38:40	130.61	133.47	41260.9	8.81772		8.81772	-133.14	-136.055
2012-12-17 20:48:40	130.91	133.8	41260.9	8.82466	41260.9	8.82466	-133.445	-136.391
2012-12-17 20:58:40	131.2	134.01	41260.9	8.8316		8.8316	-133.741	-136.606
2012-12-17 21:08:40	131.51	134.38	41260.9	8.83855		8.83855	-134.057	-136.983
2012-12-17 21:18:40	131.78	134.66	41260.9	8.84549		8.84549	-134.332	-137.268
2012-12-17 21:28:40	132.08	134.98	41260.9	8.85244		8.85244	-134.638	-137.594
2012-12-17 21:38:40	132.36	135.27	41260.9	8.85938		8.85938	-134.924	-137.89
2012-12-17 21:48:40	132.64	135.57	41260.9	8.86633	41260.9	8.86633	-135.209	-138.196
2012-12-17 21:58:40	132.93	135.86	41260.9	8.87327		8.87327	-135.505	-138.491
2012-12-17 22:08:40	133.22	136.15	41260.9	8.88022		8.88022	-135.8	-138.787
2012-12-17 22:18:40	133.52	136.45	41260.9	8.88716		8.88716	-136.106	-139.093
2012-12-17 22:28:40	133.79	136.72	41260.9	8.8941		8.8941	-136.381	-139.368
2012-12-17 22:38:40	134.07	137.04	41260.9	8.90105		8.90105	-136.667	-139.694
2012-12-17 22:48:40	134.37	137.34	41261	8.90799	41261	8.90799	-136.972	-140
2012-12-17 22:58:40	134.64	137.63	41261	8.91494		8.91494	-137.248	-140.296
2012-12-17 23:08:40	134.92	137.9	41261	8.92188		8.92188	-137.533	-140.571
2012-12-17 23:18:40	135.19	138.17	41261	8.92883		8.92883	-137.808	-140.846
2012-12-17 23:28:40	135.45	138.46	41261	8.93577		8.93577	-138.073	-141.142
2012-12-17 23:38:40	135.73	138.74	41261	8.94272		8.94272	-138.359	-141.427
2012-12-17 23:48:40	136.01	139.02	41261	8.94966	41261	8.94966	-138.644	-141.713
2012-12-17 23:58:40	136.27	139.06	41261	8.9566		8.9566	-138.909	-141.753
2012-12-18 00:08:40	136.51	139.56	41261	8.96355		8.96355	-139.154	-142.263
2012-12-18 00:18:40	136.8	139.85	41261	8.97049		8.97049	-139.45	-142.559
2012-12-18 00:28:40	137.07	140.14	41261	8.97744		8.97744	-139.725	-142.854
2012-12-18 00:38:40	137.33	140.41	41261	8.98438		8.98438	-139.99	-143.129
2012-12-18 00:48:40	137.6	140.69	41261	8.99133	41261	8.99133	-140.265	-143.415
2012-12-18 00:58:40	137.88	140.97	41261	8.99827		8.99827	-140.55	-143.7
2012-12-18 01:08:40	138.15	141.27	41261	9.00522		9.00522	-140.826	-144.006
2012-12-18 01:18:40	138.41	141.53	41261.1	9.01216		9.01216	-141.091	-144.271
2012-12-18 01:28:40	138.68	141.79	41261.1	9.0191		9.0191	-141.366	-144.536
2012-12-18 01:38:40	138.93	142.05	41261.1	9.02605		9.02605	-141.621	-144.801
2012-12-18 01:48:40	139.19	142.34	41261.1	9.03299	41261.1	9.03299	-141.886	-145.097
2012-12-18 01:58:40	139.46	142.6	41261.1	9.03994		9.03994	-142.161	-145.362
2012-12-18 02:08:40	139.71	142.87	41261.1	9.04688		9.04688	-142.416	-145.637
2012-12-18 02:18:40	139.97	143.15	41261.1	9.05383		9.05383	-142.681	-145.923
2012-12-18 02:28:40	140.23	143.41	41261.1	9.06077		9.06077	-142.946	-146.188
2012-12-18 02:38:40	140.48	143.7	41261.1	9.06772		9.06772	-143.201	-146.483
2012-12-18 02:48:40	140.74	143.97	41261.1	9.07466	41261.1	9.07466	-143.466	-146.758
2012-12-18 02:58:40	141.01	144.23	41261.1	9.0816		9.0816	-143.741	-147.023
2012-12-18 03:08:40	141.25	144.44	41261.1	9.08855		9.08855	-143.986	-147.238
2012-12-18 03:18:40	141.5	144.74	41261.1	9.09549		9.09549	-144.241	-147.543
2012-12-18 03:28:40	141.75	144.98	41261.1	9.10244		9.10244	-144.495	-147.788
2012-12-18 03:38:40	141.99	145.23	41261.2	9.10938		9.10938	-144.74	-148.043
2012-12-18 03:48:40	142.22	145.5	41261.2	9.11633	41261.2	9.11633	-144.975	-148.318
2012-12-18 03:58:40	142.48	145.77	41261.2	9.12327		9.12327	-145.24	-148.593
2012-12-18 04:08:40	142.71	146.02	41261.2	9.13022		9.13022	-145.474	-148.848
2012-12-18 04:18:40	142.97	146.25	41261.2	9.13716		9.13716	-145.739	-149.083
2012-12-18 04:28:40	143.19	146.49	41261.2	9.1441		9.1441	-145.963	-149.327
2012-12-18 04:38:40	143.42	146.75	41261.2	9.15105		9.15105	-146.198	-149.592
2012-12-18 04:48:40	143.66	146.07	41261.2	9.15799	41261.2	9.15799	-146.442	-148.899
2012-12-18 04:58:40	143.89	147.25	41261.2	9.16494		9.16494	-146.677	-150.102
2012-12-18 05:08:40	144.13	147.51	41261.2	9.17188		9.17188	-146.922	-150.367
2012-12-18 05:18:40	144.36	147.74	41261.2	9.17883		9.17883	-147.156	-150.601
2012-12-18 05:28:40	144.6	148	41261.2	9.18577		9.18577	-147.401	-150.866
2012-12-18 05:38:40	144.83	148.25	41261.2	9.19272		9.19272	-147.635	-151.121
2012-12-18 05:48:40	145.07	148.5	41261.2	9.19966	41261.2	9.19966	-147.88	-151.376
2012-12-18 05:58:40	145.29	148.72	41261.2	9.2066		9.2066	-148.104	-151.6
2012-12-18 06:08:40	145.52	148.96	41261.3	9.21355		9.21355	-148.338	-151.845
2012-12-18 06:18:40	145.75	149.23	41261.3	9.22049		9.22049	-148.573	-152.12
2012-12-18 06:28:40	145.97	149.44	41261.3	9.22744		9.22744	-148.797	-152.334
2012-12-18 06:38:40	146.2	149.7	41261.3	9.23438		9.23438	-149.032	-152.599
2012-12-18 06:48:40	146.42	149.95	41261.3	9.24133	41261.3	9.24133	-149.256	-152.854
2012-12-18 06:58:40	146.66	150.17	41261.3	9.24827		9.24827	-149.501	-153.078
2012-12-18 07:08:40	146.87	150.41	41261.3	9.25522		9.25522	-149.715	-153.323
2012-12-18 07:18:40	147.09	150.62	41261.3	9.26216		9.26216	-149.939	-153.537
2012-12-18 07:28:40	147.29	150.85	41261.3	9.2691		9.2691	-150.143	-153.772
2012-12-18 07:38:40	147.5	151.07	41261.3	9.27605		9.27605	-150.357	-153.996
2012-12-18 07:48:40	147.71	151.29	41261.3	9.28299	41261.3	9.28299	-150.571	-154.22
2012-12-18 07:58:40	147.9	151.49	41261.3	9.28994		9.28994	-150.765	-154.424
2012-12-18 08:08:40	148.11	151.71	41261.3	9.29688		9.29688	-150.979	-154.648
2012-12-18 08:18:40	148.3	151.96	41261.3	9.30383		9.30383	-151.172	-154.903
2012-12-18 08:28:40	148.52	152.22	41261.4	9.31077		9.31077	-151.397	-155.168
2012-12-18 08:38:40	148.73	152.42	41261.4	9.31772		9.31772	-151.611	-155.372
2012-12-18 08:48:40	148.95	152.71	41261.4	9.32466	41261.4	9.32466	-151.835	-155.668
2012-12-18 08:58:40	149.15	152.91	41261.4	9.3316		9.3316	-152.039	-155.872
2012-12-18 09:08:40	149.38	153.14	41261.4	9.33855		9.33855	-152.273	-156.106
2012-12-18 09:18:40	149.6	153.37	41261.4	9.34549		9.34549	-152.497	-156.34
2012-12-18 09:28:40	149.8	153.56	41261.4	9.35244		9.35244	-152.701	-156.534
2012-12-18 09:38:40	149.99	153.82	41261.4	9.35938		9.35938	-152.895	-156.799
2012-12-18 09:48:40	150.2	154.04	41261.4	9.36633	41261.4	9.36633	-153.109	-157.023
2012-12-18 09:58:40	150.4	154.25	41261.4	9.37327		9.37327	-153.313	-157.238
2012-12-18 10:08:40	150.6	154.38	41261.4	9.38022		9.38022	-153.517	-157.37
2012-12-18 10:18:40	150.78	154.66	41261.4	9.38716		9.38716	-153.7	-157.655
2012-12-18 10:28:40	150.99	154.87	41261.4	9.3941		9.3941	-153.914	-157.87
2012-12-18 10:38:40	151.2	155.1	41261.4	9.40105		9.40105	-154.128	-158.104
2012-12-18 10:48:40	151.38	155.3	41261.5	9.40799	41261.5	9.40799	-154.312	-158.308
2012-12-18 10:58:40	151.59	155.52	41261.5	9.41494		9.41494	-154.526	-158.532
2012-12-18 11:08:40	151.79	155.74	41261.5	9.42188		9.42188	-154.73	-158.756
2012-12-18 11:18:40	151.99	155.96	41261.5	9.42883		9.42883	-154.934	-158.981
2012-12-18 11:28:40	152.17	156.22	41261.5	9.43577		9.43577	-155.117	-159.246
2012-12-18 11:38:40	152.38	156.43	41261.5	9.44272		9.44272	-155.331	-159.46
2012-12-18 11:48:40	152.58	156.67	41261.5	9.44966	41261.5	9.44966	-155.535	-159.704
2012-12-18 11:58:40	152.79	156.88	41261.5	9.4566		9.4566	-155.749	-159.918
2012-12-18 12:08:40	152.99	157.13	41261.5	9.46355		9.46355	-155.953	-160.173
2012-12-18 12:18:40	153.15	157.27	41261.5	9.47049		9.47049	-156.116	-160.316
2012-12-18 12:28:40	153.32	157.47	41261.5	9.47744		9.47744	-156.29	-160.52
2012-12-18 12:38:40	153.54	157.68	41261.5	9.48438		9.48438	-156.514	-160.734
2012-12-18 12:48:40	153.73	157.91	41261.5	9.49133	41261.5	9.49133	-156.707	-160.968
2012-12-18 12:58:40	153.93	158.15	41261.5	9.49827		9.49827	-156.911	-161.213
2012-12-18 13:08:40	154.13	158.38	41261.5	9.50522		9.50522	-157.115	-161.448
2012-12-18 13:18:40	154.31	158.59	41261.6	9.51216		9.51216	-157.299	-161.662
2012-12-18 13:28:40	154.51	158.8	41261.6	9.5191		9.5191	-157.503	-161.876
2012-12-18 13:38:40	154.72	159.03	41261.6	9.52605		9.52605	-157.717	-162.11
2012-12-18 13:48:40	154.89	159.23	41261.6	9.53299	41261.6	9.53299	-157.89	-162.314
2012-12-18 13:58:40	155.09	159.44	41261.6	9.53994		9.53994	-158.094	-162.528
2012-12-18 14:08:40	155.27	159.67	41261.6	9.54688		9.54688	-158.277	-162.762
2012-12-18 14:18:40	155.47	159.87	41261.6	9.55383		9.55383	-158.481	-162.966
2012-12-18 14:28:40	155.64	160.09	41261.6	9.56077		9.56077	-158.654	-163.191
2012-12-18 14:38:40	155.82	160.31	41261.6	9.56772		9.56772	-158.838	-163.415
2012-12-18 14:48:40	156.02	160.5	41261.6	9.57466	41261.6	9.57466	-159.042	-163.609
2012-12-18 14:58:40	156.2	160.74	41261.6	9.5816		9.5816	-159.225	-163.853
2012-12-18 15:08:40	156.37	160.86	41261.6	9.58855		9.58855	-159.399	-163.976
2012-12-18 15:18:40	156.57	161.14	41261.6	9.59549		9.59549	-159.602	-164.261
2012-12-18 15:28:40	156.75	161.37	41261.6	9.60244		9.60244	-159.786	-164.495
2012-12-18 15:38:40	156.93	161.59	41261.7	9.60938		9.60938	-159.969	-164.72
2012-12-18 15:48:40	157.12	161.75	41261.7	9.61633	41261.7	9.61633	-160.163	-164.883
2012-12-18 15:58:40	157.29	161.98	41261.7	9.62327		9.62327	-160.336	-165.117
2012-12-18 16:08:40	157.47	162.14	41261.7	9.63022		9.63022	-160.52	-165.28
2012-12-18 16:18:40	157.64	162.42	41261.7	9.63716		9.63716	-160.693	-165.566
2012-12-18 16:28:40	156.46	158.44	41261.7	9.6441		9.6441	-159.49	-161.509
2012-12-18 16:38:40	158.03	162.85	41261.7	9.65105		9.65105	-161.091	-166.004
2012-12-18 16:48:40	158.21	163.09	41261.7	9.65799	41261.7	9.65799	-161.274	-166.249
2012-12-18 16:58:40	158.41	163.31	41261.7	9.66494		9.66494	-161.478	-166.473
2012-12-18 17:08:40	158.59	163.5	41261.7	9.67188		9.67188	-161.662	-166.667
2012-12-18 17:18:40	158.77	163.71	41261.7	9.67883		9.67883	-161.845	-166.881
2012-12-18 17:28:40	158.92	163.92	41261.7	9.68577		9.68577	-161.998	-167.095
2012-12-18 17:38:40	159.09	164.14	41261.7	9.69272		9.69272	-162.171	-167.319
2012-12-18 17:48:40	159.29	164.34	41261.7	9.69966	41261.7	9.69966	-162.375	-167.523
2012-12-18 17:58:40	159.48	164.47	41261.7	9.7066		9.7066	-162.569	-167.655
2012-12-18 18:08:40	159.65	164.77	41261.8	9.71355		9.71355	-162.742	-167.961
2012-12-18 18:18:40	159.81	164.94	41261.8	9.72049		9.72049	-162.905	-168.135
2012-12-18 18:28:40	159.99	165.17	41261.8	9.72744		9.72744	-163.089	-168.369
2012-12-18 18:38:40	160.16	165.38	41261.8	9.73438		9.73438	-163.262	-168.583
2012-12-18 18:48:40	160.33	165.6	41261.8	9.74133	41261.8	9.74133	-163.435	-168.807
2012-12-18 18:58:40	160.51	165.79	41261.8	9.74827		9.74827	-163.619	-169.001
2012-12-18 19:08:40	160.68	165.98	41261.8	9.75522		9.75522	-163.792	-169.195
2012-12-18 19:18:40	160.86	166.21	41261.8	9.76216		9.76216	-163.976	-169.429
2012-12-18 19:28:40	161.02	166.42	41261.8	9.7691		9.7691	-164.139	-169.643
2012-12-18 19:38:40	161.21	166.64	41261.8	9.77605		9.77605	-164.332	-169.867
2012-12-18 19:48:40	161.38	166.86	41261.8	9.78299	41261.8	9.78299	-164.506	-170.092
2012-12-18 19:58:40	161.56	167.08	41261.8	9.78994		9.78994	-164.689	-170.316
2012-12-18 20:08:40	161.71	167.26	41261.8	9.79688		9.79688	-164.842	-170.499
2012-12-18 20:18:40	161.89	167.49	41261.8	9.80383		9.80383	-165.025	-170.734
2012-12-18 20:28:40	162.08	167.68	41261.9	9.81077		9.81077	-165.219	-170.928
2012-12-18 20:38:40	162.24	167.89	41261.9	9.81772		9.81772	-165.382	-171.142
2012-12-18 20:48:40	162.41	168.11	41261.9	9.82466	41261.9	9.82466	-165.556	-171.366
2012-12-18 20:58:40	162.57	168.36	41261.9	9.8316		9.8316	-165.719	-171.621
2012-12-18 21:08:40	162.76	168.55	41261.9	9.83855		9.83855	-165.912	-171.814
2012-12-18 21:18:40	162.92	168.78	41261.9	9.84549		9.84549	-166.075	-172.049
2012-12-18 21:28:40	163.08	168.92	41261.9	9.85244		9.85244	-166.239	-172.192
2012-12-18 21:38:40	163.27	169.19	41261.9	9.85938		9.85938	-166.432	-172.467
2012-12-18 21:48:40	163.44	169.4	41261.9	9.86633	41261.9	9.86633	-166.606	-172.681
2012-12-18 21:58:40	163.61	169.59	41261.9	9.87327		9.87327	-166.779	-172.875
2012-12-18 22:08:40	163.78	169.82	41261.9	9.88022		9.88022	-166.952	-173.109
2012-12-18 22:18:40	163.95	170.02	41261.9	9.88716		9.88716	-167.125	-173.313
2012-12-18 22:28:40	164.11	170.2	41261.9	9.8941		9.8941	-167.288	-173.496
2012-12-18 22:38:40	164.27	170.39	41261.9	9.90105		9.90105	-167.452	-173.69
2012-12-18 22:48:40	164.43	170.62	41262	9.90799	41262	9.90799	-167.615	-173.925
2012-12-18 22:58:40	164.59	170.82	41262	9.91494		9.91494	-167.778	-174.128
2012-12-18 23:08:40	164.76	171.03	41262	9.92188		9.92188	-167.951	-174.343
2012-12-18 23:18:40	164.92	171.26	41262	9.92883		9.92883	-168.114	-174.577
2012-12-18 23:28:40	165.08	171.46	41262	9.93577		9.93577	-168.277	-174.781
2012-12-18 23:38:40	165.24	171.68	41262	9.94272		9.94272	-168.44	-175.005
2012-12-18 23:48:40	165.41	171.88	41262	9.94966	41262	9.94966	-168.614	-175.209
2012-12-18 23:58:40	165.58	172.09	41262	9.9566		9.9566	-168.787	-175.423
2012-12-19 00:08:40	165.72	172.3	41262	9.96355		9.96355	-168.93	-175.637
2012-12-19 00:18:40	165.88	172.49	41262	9.97049		9.97049	-169.093	-175.831
2012-12-19 00:28:40	166.04	172.7	41262	9.97744		9.97744	-169.256	-176.045
2012-12-19 00:38:40	166.19	172.88	41262	9.98438		9.98438	-169.409	-176.228
2012-12-19 00:48:40	166.34	173.1	41262	9.99133	41262	9.99133	-169.562	-176.453
2012-12-19 00:58:40	166.51	173.3	41262	9.99827		9.99827	-169.735	-176.656
2012-12-19 01:08:40	166.66	173.48	41262	10.0052		10.0052	-169.888	-176.84
2012-12-19 01:18:40	166.8	173.38	41262.1	10.0122		10.0122	-170.031	-176.738
2012-12-19 01:28:40	166.96	173.91	41262.1	10.0191		10.0191	-170.194	-177.278
2012-12-19 01:38:40	167.12	174.12	41262.1	10.026		10.026	-170.357	-177.492
2012-12-19 01:48:40	167.24	174.34	41262.1	10.033	41262.1	10.033	-170.479	-177.717
2012-12-19 01:58:40	167.41	174.54	41262.1	10.0399		10.0399	-170.652	-177.92
2012-12-19 02:08:40	167.54	174.71	41262.1	10.0469		10.0469	-170.785	-178.094
2012-12-19 02:18:40	167.71	174.93	41262.1	10.0538		10.0538	-170.958	-178.318
2012-12-19 02:28:40	167.83	175.13	41262.1	10.0608		10.0608	-171.081	-178.522
2012-12-19 02:38:40	167.94	175.28	41262.1	10.0677		10.0677	-171.193	-178.675
2012-12-19 02:48:40	168.1	175.47	41262.1	10.0747	41262.1	10.0747	-171.356	-178.869
2012-12-19 02:58:40	168.24	175.67	41262.1	10.0816		10.0816	-171.498	-179.072
2012-12-19 03:08:40	168.38	175.88	41262.1	10.0885		10.0885	-171.641	-179.286
2012-12-19 03:18:40	168.55	176.09	41262.1	10.0955		10.0955	-171.814	-179.501
2012-12-19 03:28:40	168.7	176.32	41262.1	10.1024		10.1024	-171.967	-179.735
2012-12-19 03:38:40	168.86	176.51	41262.2	10.1094		10.1094	-172.13	-179.929
2012-12-19 03:48:40	168.99	176.72	41262.2	10.1163	41262.2	10.1163	-172.263	-180.143
2012-12-19 03:58:40	169.1	176.94	41262.2	10.1233		10.1233	-172.375	-180.367
2012-12-19 04:08:40	169.26	177.14	41262.2	10.1302		10.1302	-172.538	-180.571
2012-12-19 04:18:40	169.42	177.31	41262.2	10.1372		10.1372	-172.701	-180.744
2012-12-19 04:28:40	169.55	177.53	41262.2	10.1441		10.1441	-172.834	-180.968
2012-12-19 04:38:40	169.68	177.72	41262.2	10.151		10.151	-172.966	-181.162
2012-12-19 04:48:40	169.83	177.92	41262.2	10.158	41262.2	10.158	-173.119	-181.366
2012-12-19 04:58:40	169.97	178.13	41262.2	10.1649		10.1649	-173.262	-181.58
2012-12-19 05:08:40	170.12	178.32	41262.2	10.1719		10.1719	-173.415	-181.774
2012-12-19 05:18:40	170.25	178.54	41262.2	10.1788		10.1788	-173.547	-181.998
2012-12-19 05:28:40	170.4	178.75	41262.2	10.1858		10.1858	-173.7	-182.212
2012-12-19 05:38:40	170.54	178.88	41262.2	10.1927		10.1927	-173.843	-182.345
2012-12-19 05:48:40	170.7	179.14	41262.2	10.1997	41262.2	10.1997	-174.006	-182.61
2012-12-19 05:58:40	170.81	179.37	41262.2	10.2066		10.2066	-174.118	-182.844
2012-12-19 06:08:40	170.96	179.59	41262.3	10.2135		10.2135	-174.271	-183.068
2012-12-19 06:18:40	171.08	179.77	41262.3	10.2205		10.2205	-174.393	-183.252
2012-12-19 06:28:40	171.24	179.97	41262.3	10.2274		10.2274	-174.557	-183.456
2012-12-19 06:38:40	171.35	180.17	41262.3	10.2344		10.2344	-174.669	-183.66
2012-12-19 06:48:40	171.49	180.37	41262.3	10.2413	41262.3	10.2413	-174.811	-183.863
2012-12-19 06:58:40	171.6	180.59	41262.3	10.2483		10.2483	-174.924	-184.088
2012-12-19 07:08:40	171.78	180.78	41262.3	10.2552		10.2552	-175.107	-184.281
2012-12-19 07:18:40	171.91	180.99	41262.3	10.2622		10.2622	-175.24	-184.495
2012-12-19 07:28:40	172.03	181.13	41262.3	10.2691		10.2691	-175.362	-184.638
2012-12-19 07:38:40	172.16	181.41	41262.3	10.276		10.276	-175.494	-184.924
2012-12-19 07:48:40	172.29	181.58	41262.3	10.283	41262.3	10.283	-175.627	-185.097
2012-12-19 07:58:40	172.43	181.8	41262.3	10.2899		10.2899	-175.77	-185.321
2012-12-19 08:08:40	172.55	181.95	41262.3	10.2969		10.2969	-175.892	-185.474
2012-12-19 08:18:40	172.73	182.13	41262.3	10.3038		10.3038	-176.075	-185.657
2012-12-19 08:28:40	172.89	182.39	41262.4	10.3108		10.3108	-176.239	-185.923
2012-12-19 08:38:40	173.02	182.64	41262.4	10.3177		10.3177	-176.371	-186.177
2012-12-19 08:48:40	173.17	182.86	41262.4	10.3247	41262.4	10.3247	-176.524	-186.402
2012-12-19 08:58:40	173.3	183.05	41262.4	10.3316		10.3316	-176.656	-186.595
2012-12-19 09:08:40	173.45	183.3	41262.4	10.3385		10.3385	-176.809	-186.85
2012-12-19 09:18:40	173.59	183.48	41262.4	10.3455		10.3455	-176.952	-187.034
2012-12-19 09:28:40	173.7	183.71	41262.4	10.3524		10.3524	-177.064	-187.268
2012-12-19 09:38:40	173.86	183.92	41262.4	10.3594		10.3594	-177.227	-187.482
2012-12-19 09:48:40	173.97	184.13	41262.4	10.3663	41262.4	10.3663	-177.339	-187.696
2012-12-19 09:58:40	174.11	184.35	41262.4	10.3733		10.3733	-177.482	-187.92
2012-12-19 10:08:40	174.23	184.57	41262.4	10.3802		10.3802	-177.604	-188.145
2012-12-19 10:18:40	174.37	184.74	41262.4	10.3872		10.3872	-177.747	-188.318
2012-12-19 10:28:40	174.49	184.95	41262.4	10.3941		10.3941	-177.87	-188.532
2012-12-19 10:38:40	174.62	185.18	41262.4	10.401		10.401	-178.002	-188.767
2012-12-19 10:48:40	174.75	185.34	41262.5	10.408	41262.5	10.408	-178.135	-188.93
2012-12-19 10:58:40	174.89	185.59	41262.5	10.4149		10.4149	-178.277	-189.185
2012-12-19 11:08:40	175.02	185.78	41262.5	10.4219		10.4219	-178.41	-189.378
2012-12-19 11:18:40	175.13	186	41262.5	10.4288		10.4288	-178.522	-189.602
2012-12-19 11:28:40	175.28	186.2	41262.5	10.4358		10.4358	-178.675	-189.806
2012-12-19 11:38:40	175.37	186.41	41262.5	10.4427		10.4427	-178.767	-190.02
2012-12-19 11:48:40	175.55	186.52	41262.5	10.4497	41262.5	10.4497	-178.95	-190.133
2012-12-19 11:58:40	175.67	186.85	41262.5	10.4566		10.4566	-179.072	-190.469
2012-12-19 12:08:40	175.79	187.06	41262.5	10.4635		10.4635	-179.195	-190.683
2012-12-19 12:18:40	175.92	187.27	41262.5	10.4705		10.4705	-179.327	-190.897
2012-12-19 12:28:40	176.06	187.5	41262.5	10.4774		10.4774	-179.47	-191.131
2012-12-19 12:38:40	176.19	187.72	41262.5	10.4844		10.4844	-179.602	-191.356
2012-12-19 12:48:40	176.31	187.89	41262.5	10.4913	41262.5	10.4913	-179.725	-191.529
2012-12-19 12:58:40	176.43	188.12	41262.5	10.4983		10.4983	-179.847	-191.764
2012-12-19 13:08:40	176.58	188.25	41262.5	10.5052		10.5052	-180	-191.896
2012-12-19 13:18:40	176.7	188.51	41262.6	10.5122		10.5122	-180.122	-192.161
2012-12-19 13:28:40	176.82	188.67	41262.6	10.5191		10.5191	-180.245	-192.324
2012-12-19 13:38:40	176.95	188.93	41262.6	10.526		10.526	-180.377	-192.589
2012-12-19 13:48:40	177.1	189.1	41262.6	10.533	41262.6	10.533	-180.53	-192.762
2012-12-19 13:58:40	177.23	189.35	41262.6	10.5399		10.5399	-180.663	-193.017
2012-12-19 14:08:40	177.37	189.36	41262.6	10.5469		10.5469	-180.805	-193.028
2012-12-19 14:18:40	177.46	189.71	41262.6	10.5538		10.5538	-180.897	-193.384
2012-12-19 14:28:40	177.61	189.96	41262.6	10.5608		10.5608	-181.05	-193.639
2012-12-19 14:38:40	177.75	190.15	41262.6	10.5677		10.5677	-181.193	-193.833
2012-12-19 14:48:40	177.86	190.33	41262.6	10.5747	41262.6	10.5747	-181.305	-194.016
2012-12-19 14:58:40	177.97	190.56	41262.6	10.5816		10.5816	-181.417	-194.251
2012-12-19 15:08:40	178.09	190.7	41262.6	10.5885		10.5885	-181.539	-194.393
2012-12-19 15:18:40	178.23	190.94	41262.6	10.5955		10.5955	-181.682	-194.638
2012-12-19 15:28:40	178.35	191.2	41262.6	10.6024		10.6024	-181.804	-194.903
2012-12-19 15:38:40	178.47	191.39	41262.7	10.6094		10.6094	-181.927	-195.097
2012-12-19 15:48:40	178.61	191.61	41262.7	10.6163	41262.7	10.6163	-182.069	-195.321
2012-12-19 15:58:40	178.7	191.83	41262.7	10.6233		10.6233	-182.161	-195.545
2012-12-19 16:08:40	178.85	192.04	41262.7	10.6302		10.6302	-182.314	-195.759
2012-12-19 16:18:40	178.97	192.18	41262.7	10.6372		10.6372	-182.436	-195.902
2012-12-19 16:28:40	179.05	192.39	41262.7	10.6441		10.6441	-182.518	-196.116
2012-12-19 16:38:40	179.18	192.62	41262.7	10.651		10.651	-182.65	-196.351
2012-12-19 16:48:40	178.67	191.84	41262.7	10.658	41262.7	10.658	-182.13	-195.556
2012-12-19 16:58:40	179.98	192.87	41262.7	10.6649		10.6649	-183.466	-196.606
2012-12-19 17:08:40	180.17	193.13	41262.7	10.6719		10.6719	-183.66	-196.871
2012-12-19 17:18:40	180.33	193.37	41262.7	10.6788		10.6788	-183.823	-197.115
2012-12-19 17:28:40	180.5	193.54	41262.7	10.6858		10.6858	-183.996	-197.288
2012-12-19 17:38:40	180.62	193.82	41262.7	10.6927		10.6927	-184.118	-197.574
2012-12-19 17:48:40	180.8	194.07	41262.7	10.6997	41262.7	10.6997	-184.302	-197.829
2012-12-19 17:58:40	180.94	194.27	41262.7	10.7066		10.7066	-184.444	-198.033
2012-12-19 18:08:40	181.07	194.51	41262.8	10.7135		10.7135	-184.577	-198.277
2012-12-19 18:18:40	181.23	194.72	41262.8	10.7205		10.7205	-184.74	-198.491
2012-12-19 18:28:40	181.34	194.92	41262.8	10.7274		10.7274	-184.852	-198.695
2012-12-19 18:38:40	181.47	195.16	41262.8	10.7344		10.7344	-184.985	-198.94
2012-12-19 18:48:40	181.61	195.34	41262.8	10.7413	41262.8	10.7413	-185.127	-199.123
2012-12-19 18:58:40	181.76	195.58	41262.8	10.7483		10.7483	-185.28	-199.368
2012-12-19 19:08:40	181.9	195.78	41262.8	10.7552		10.7552	-185.423	-199.572
2012-12-19 19:18:40	182.04	195.98	41262.8	10.7622		10.7622	-185.566	-199.776
2012-12-19 19:28:40	182.13	196.21	41262.8	10.7691		10.7691	-185.657	-200.01
2012-12-19 19:38:40	182.3	196.45	41262.8	10.776		10.776	-185.831	-200.255
2012-12-19 19:48:40	182.44	196.63	41262.8	10.783	41262.8	10.783	-185.973	-200.438
2012-12-19 19:58:40	182.57	196.89	41262.8	10.7899		10.7899	-186.106	-200.703
2012-12-19 20:08:40	182.68	197.11	41262.8	10.7969		10.7969	-186.218	-200.928
2012-12-19 20:18:40	182.84	197.34	41262.8	10.8038		10.8038	-186.381	-201.162
2012-12-19 20:28:40	182.97	197.54	41262.9	10.8108		10.8108	-186.514	-201.366
2012-12-19 20:38:40	183.09	197.74	41262.9	10.8177		10.8177	-186.636	-201.57
2012-12-19 20:48:40	183.18	197.97	41262.9	10.8247	41262.9	10.8247	-186.728	-201.804
2012-12-19 20:58:40	183.34	198.16	41262.9	10.8316		10.8316	-186.891	-201.998
2012-12-19 21:08:40	183.49	198.33	41262.9	10.8385		10.8385	-187.044	-202.171
2012-12-19 21:18:40	183.6	198.56	41262.9	10.8455		10.8455	-187.156	-202.406
2012-12-19 21:28:40	183.75	198.78	41262.9	10.8524		10.8524	-187.309	-202.63
2012-12-19 21:38:40	183.8	199.03	41262.9	10.8594		10.8594	-187.36	-202.885
2012-12-19 21:48:40	183.93	199.23	41262.9	10.8663	41262.9	10.8663	-187.492	-203.089
2012-12-19 21:58:40	184.14	199.44	41262.9	10.8733		10.8733	-187.706	-203.303
2012-12-19 22:08:40	184.23	199.66	41262.9	10.8802		10.8802	-187.798	-203.527
2012-12-19 22:18:40	184.39	199.87	41262.9	10.8872		10.8872	-187.961	-203.741
2012-12-19 22:28:40	184.51	200.12	41262.9	10.8941		10.8941	-188.084	-203.996
2012-12-19 22:38:40	184.6	200.24	41262.9	10.901		10.901	-188.175	-204.118
2012-12-19 22:48:40	184.78	200.56	41263	10.908	41263	10.908	-188.359	-204.444
2012-12-19 22:58:40	184.92	200.75	41263	10.9149		10.9149	-188.502	-204.638
2012-12-19 23:08:40	185.05	200.94	41263	10.9219		10.9219	-188.634	-204.832
2012-12-19 23:18:40	185.15	201.15	41263	10.9288		10.9288	-188.736	-205.046
2012-12-19 23:28:40	185.24	201.37	41263	10.9358		10.9358	-188.828	-205.27
2012-12-19 23:38:40	185.36	201.52	41263	10.9427		10.9427	-188.95	-205.423
2012-12-19 23:48:40	185.38	201.7	41263	10.9497	41263	10.9497	-188.97	-205.607
2012-12-19 23:58:40	185.59	201.86	41263	10.9566		10.9566	-189.185	-205.77
2012-12-20 00:08:40	185.72	202.16	41263	10.9635		10.9635	-189.317	-206.075
2012-12-20 00:18:40	185.85	202.28	41263	10.9705		10.9705	-189.45	-206.198
2012-12-20 00:28:40	185.98	202.6	41263	10.9774		10.9774	-189.582	-206.524
2012-12-20 00:38:40	186.1	202.78	41263	10.9844		10.9844	-189.704	-206.707
2012-12-20 00:48:40	186.24	203	41263	10.9913	41263	10.9913	-189.847	-206.932
2012-12-20 00:58:40	186.35	203.22	41263	10.9983		10.9983	-189.959	-207.156
2012-12-20 01:08:40	186.45	203.41	41263	11.0052		11.0052	-190.061	-207.35
2012-12-20 01:18:40	186.59	203.63	41263.1	11.0122		11.0122	-190.204	-207.574
2012-12-20 01:28:40	186.75	203.91	41263.1	11.0191		11.0191	-190.367	-207.859
2012-12-20 01:38:40	186.89	204.11	41263.1	11.026		11.026	-190.51	-208.063
2012-12-20 01:48:40	186.99	204.27	41263.1	11.033	41263.1	11.033	-190.612	-208.226
2012-12-20 01:58:40	187.14	204.51	41263.1	11.0399		11.0399	-190.765	-208.471
2012-12-20 02:08:40	187.27	204.71	41263.1	11.0469		11.0469	-190.897	-208.675
2012-12-20 02:18:40	187.38	204.93	41263.1	11.0538		11.0538	-191.009	-208.899
2012-12-20 02:28:40	187.51	205.15	41263.1	11.0608		11.0608	-191.142	-209.123
2012-12-20 02:38:40	187.64	205.33	41263.1	11.0677		11.0677	-191.274	-209.307
2012-12-20 02:48:40	187.74	205.46	41263.1	11.0747	41263.1	11.0747	-191.376	-209.439
2012-12-20 02:58:40	187.85	205.73	41263.1	11.0816		11.0816	-191.488	-209.715
2012-12-20 03:08:40	187.98	205.93	41263.1	11.0885		11.0885	-191.621	-209.918
2012-12-20 03:18:40	188.11	206.16	41263.1	11.0955		11.0955	-191.753	-210.153
2012-12-20 03:28:40	188.22	206.4	41263.1	11.1024		11.1024	-191.865	-210.398
2012-12-20 03:38:40	188.35	206.54	41263.2	11.1094		11.1094	-191.998	-210.54
2012-12-20 03:48:40	188.46	206.77	41263.2	11.1163	41263.2	11.1163	-192.11	-210.775
2012-12-20 03:58:40	188.58	207.05	41263.2	11.1233		11.1233	-192.232	-211.06
2012-12-20 04:08:40	188.69	207.23	41263.2	11.1302		11.1302	-192.345	-211.244
2012-12-20 04:18:40	188.83	207.45	41263.2	11.1372		11.1372	-192.487	-211.468
2012-12-20 04:28:40	188.96	207.67	41263.2	11.1441		11.1441	-192.62	-211.692
2012-12-20 04:38:40	189.08	207.9	41263.2	11.151		11.151	-192.742	-211.927
2012-12-20 04:48:40	189.2	208.12	41263.2	11.158	41263.2	11.158	-192.864	-212.151
2012-12-20 04:58:40	189.33	208.35	41263.2	11.1649		11.1649	-192.997	-212.385
2012-12-20 05:08:40	189.44	208.54	41263.2	11.1719		11.1719	-193.109	-212.579
2012-12-20 05:18:40	189.57	208.73	41263.2	11.1788		11.1788	-193.242	-212.773
2012-12-20 05:28:40	189.7	208.93	41263.2	11.1858		11.1858	-193.374	-212.977
2012-12-20 05:38:40	189.83	209.18	41263.2	11.1927		11.1927	-193.507	-213.231
2012-12-20 05:48:40	189.95	209.4	41263.2	11.1997	41263.2	11.1997	-193.629	-213.456
2012-12-20 05:58:40	190.03	209.5	41263.2	11.2066		11.2066	-193.71	-213.558
2012-12-20 06:08:40	190.17	209.83	41263.3	11.2135		11.2135	-193.853	-213.894
2012-12-20 06:18:40	190.29	210.07	41263.3	11.2205		11.2205	-193.976	-214.139
2012-12-20 06:28:40	190.4	210.1	41263.3	11.2274		11.2274	-194.088	-214.169
2012-12-20 06:38:40	190.54	210.48	41263.3	11.2344		11.2344	-194.23	-214.557
2012-12-20 06:48:40	190.64	210.71	41263.3	11.2413	41263.3	11.2413	-194.332	-214.791
2012-12-20 06:58:40	190.76	210.88	41263.3	11.2483		11.2483	-194.455	-214.964
2012-12-20 07:08:40	190.88	211.14	41263.3	11.2552		11.2552	-194.577	-215.229
2012-12-20 07:18:40	190.99	211.31	41263.3	11.2622		11.2622	-194.689	-215.403
2012-12-20 07:28:40	191.06	211.53	41263.3	11.2691		11.2691	-194.76	-215.627
2012-12-20 07:38:40	191.1	211.66	41263.3	11.276		11.276	-194.801	-215.759
2012-12-20 07:48:40	191.21	211.83	41263.3	11.283	41263.3	11.283	-194.913	-215.933
2012-12-20 07:58:40	191.24	212.04	41263.3	11.2899		11.2899	-194.944	-216.147
2012-12-20 08:08:40	191.35	212.21	41263.3	11.2969		11.2969	-195.056	-216.32
2012-12-20 08:18:40	191.42	212.38	41263.3	11.3038		11.3038	-195.127	-216.493
2012-12-20 08:28:40	188.74	208.73	41263.4	11.3108		11.3108	-192.396	-212.773
2012-12-20 08:38:40	192.77	212.45	41263.4	11.3177		11.3177	-196.504	-216.565
2012-12-20 08:48:40	193.82	212.74	41263.4	11.3247	41263.4	11.3247	-197.574	-216.86
2012-12-20 08:58:40	194.12	213.09	41263.4	11.3316		11.3316	-197.88	-217.217
2012-12-20 09:08:40	194.4	213.31	41263.4	11.3385		11.3385	-198.165	-217.441
2012-12-20 09:18:40	194.66	213.31	41263.4	11.3455		11.3455	-198.43	-217.441
2012-12-20 09:28:40	194.87	213.77	41263.4	11.3524		11.3524	-198.644	-217.91
2012-12-20 09:38:40	194.94	213.88	41263.4	11.3594		11.3594	-198.716	-218.022
2012-12-20 09:48:40	195.23	214.26	41263.4	11.3663	41263.4	11.3663	-199.011	-218.41
2012-12-20 09:58:40	195.41	214.49	41263.4	11.3733		11.3733	-199.195	-218.644
2012-12-20 10:08:40	195.62	214.75	41263.4	11.3802		11.3802	-199.409	-218.909
2012-12-20 10:18:40	195.73	214.93	41263.4	11.3872		11.3872	-199.521	-219.093
2012-12-20 10:28:40	195.81	215.1	41263.4	11.3941		11.3941	-199.602	-219.266
2012-12-20 10:38:40	195.85	215.29	41263.4	11.401		11.401	-199.643	-219.46
2012-12-20 10:48:40	195.87	215.56	41263.5	11.408	41263.5	11.408	-199.664	-219.735
2012-12-20 10:58:40	195.9	215.76	41263.5	11.4149		11.4149	-199.694	-219.939
2012-12-20 11:08:40	195.91	215.92	41263.5	11.4219		11.4219	-199.704	-220.102
2012-12-20 11:18:40	195.95	216.14	41263.5	11.4288		11.4288	-199.745	-220.326
2012-12-20 11:28:40	196	216.3	41263.5	11.4358		11.4358	-199.796	-220.489
2012-12-20 11:38:40	192.07	211.03	41263.5	11.4427		11.4427	-195.79	-215.117
2012-12-20 11:48:40	196.02	216.45	41263.5	11.4497	41263.5	11.4497	-199.817	-220.642
2012-12-20 11:58:40	196.27	216.78	41263.5	11.4566		11.4566	-200.071	-220.979
2012-12-20 12:08:40	196.34	216.97	41263.5	11.4635		11.4635	-200.143	-221.172
2012-12-20 12:18:40	195.23	216.26	41263.5	11.4705		11.4705	-199.011	-220.449
2012-12-20 12:28:40	194.61	214.92	41263.5	11.4774		11.4774	-198.379	-219.083
2012-12-20 12:38:40	196.78	216.89	41263.5	11.4844		11.4844	-200.591	-221.091
2012-12-20 12:48:40	197.65	217.34	41263.5	11.4913	41263.5	11.4913	-201.478	-221.549
2012-12-20 12:58:40	198.19	217.68	41263.5	11.4983		11.4983	-202.029	-221.896
2012-12-20 13:08:40	198.6	218	41263.5	11.5052		11.5052	-202.446	-222.222
2012-12-20 13:18:40	198.76	218.38	41263.6	11.5122		11.5122	-202.61	-222.61
2012-12-20 13:28:40	199.3	218.69	41263.6	11.5191		11.5191	-203.16	-222.926
2012-12-20 13:38:40	199.47	219	41263.6	11.526		11.526	-203.333	-223.242
2012-12-20 13:48:40	199.78	219.28	41263.6	11.533	41263.6	11.533	-203.649	-223.527
2012-12-20 13:58:40	199.89	219.61	41263.6	11.5399		11.5399	-203.761	-223.863
2012-12-20 14:08:40	200.13	219.86	41263.6	11.5469		11.5469	-204.006	-224.118
2012-12-20 14:18:40	200.3	220.19	41263.6	11.5538		11.5538	-204.179	-224.455
2012-12-20 14:28:40	200.49	220.43	41263.6	11.5608		11.5608	-204.373	-224.699
2012-12-20 14:38:40	200.56	220.7	41263.6	11.5677		11.5677	-204.444	-224.975
2012-12-20 14:48:40	200.8	220.99	41263.6	11.5747	41263.6	11.5747	-204.689	-225.27
2012-12-20 14:58:40	200.95	221.12	41263.6	11.5816		11.5816	-204.842	-225.403
2012-12-20 15:08:40	201.14	221.47	41263.6	11.5885		11.5885	-205.036	-225.759
2012-12-20 15:18:40	201.29	221.76	41263.6	11.5955		11.5955	-205.189	-226.055
2012-12-20 15:28:40	201.51	222.07	41263.6	11.6024		11.6024	-205.413	-226.371
2012-12-20 15:38:40	201.57	222.38	41263.7	11.6094		11.6094	-205.474	-226.687
2012-12-20 15:48:40	201.77	222.66	41263.7	11.6163	41263.7	11.6163	-205.678	-226.972
2012-12-20 15:58:40	201.91	222.96	41263.7	11.6233		11.6233	-205.821	-227.278
2012-12-20 16:08:40	202.03	223.15	41263.7	11.6302		11.6302	-205.943	-227.472
2012-12-20 16:18:40	202.16	223.5	41263.7	11.6372		11.6372	-206.075	-227.829
2012-12-20 16:28:40	202.28	223.75	41263.7	11.6441		11.6441	-206.198	-228.084
2012-12-20 16:38:40	202.48	224.07	41263.7	11.651		11.651	-206.402	-228.41
2012-12-20 16:48:40	202.58	224.28	41263.7	11.658	41263.7	11.658	-206.504	-228.624
2012-12-20 16:58:40	202.8	224.6	41263.7	11.6649		11.6649	-206.728	-228.95
2012-12-20 17:08:40	202.9	224.91	41263.7	11.6719		11.6719	-206.83	-229.266
2012-12-20 17:18:40	203.03	225.19	41263.7	11.6788		11.6788	-206.962	-229.551
2012-12-20 17:28:40	201.75	224.61	41263.7	11.6858		11.6858	-205.657	-228.96
2012-12-20 17:38:40	202.79	225.56	41263.7	11.6927		11.6927	-206.718	-229.929
2012-12-20 17:48:40	203.04	225.91	41263.7	11.6997	41263.7	11.6997	-206.972	-230.285
2012-12-20 17:58:40	203.2	226.18	41263.7	11.7066		11.7066	-207.136	-230.561
2012-12-20 18:08:40	203.39	226.5	41263.8	11.7135		11.7135	-207.329	-230.887
2012-12-20 18:18:40	203.32	226.84	41263.8	11.7205		11.7205	-207.258	-231.233
2012-12-20 18:28:40	203.77	227.15	41263.8	11.7274		11.7274	-207.717	-231.549
2012-12-20 18:38:40	203.9	227.47	41263.8	11.7344		11.7344	-207.849	-231.876
2012-12-20 18:48:40	204.11	227.75	41263.8	11.7413	41263.8	11.7413	-208.063	-232.161
2012-12-20 18:58:40	204.26	227.89	41263.8	11.7483		11.7483	-208.216	-232.304
2012-12-20 19:08:40	204.41	228.15	41263.8	11.7552		11.7552	-208.369	-232.569
2012-12-20 19:18:40	204.53	228.47	41263.8	11.7622		11.7622	-208.491	-232.895
2012-12-20 19:28:40	204.7	228.79	41263.8	11.7691		11.7691	-208.665	-233.221
2012-12-20 19:38:40	204.91	229.13	41263.8	11.776		11.776	-208.879	-233.568
2012-12-20 19:48:40	204.88	229.4	41263.8	11.783	41263.8	11.783	-208.848	-233.843
2012-12-20 19:58:40	205.27	229.72	41263.8	11.7899		11.7899	-209.246	-234.169
2012-12-20 20:08:40	205.45	230.02	41263.8	11.7969		11.7969	-209.429	-234.475
2012-12-20 20:18:40	205.6	230.33	41263.8	11.8038		11.8038	-209.582	-234.791
2012-12-20 20:28:40	205.77	230.64	41263.9	11.8108		11.8108	-209.755	-235.107
2012-12-20 20:38:40	205.91	230.91	41263.9	11.8177		11.8177	-209.898	-235.382
2012-12-20 20:48:40	205.96	231.22	41263.9	11.8247	41263.9	11.8247	-209.949	-235.698
2012-12-20 20:58:40	206.19	231.49	41263.9	11.8316		11.8316	-210.183	-235.973
2012-12-20 21:08:40	206.34	231.85	41263.9	11.8385		11.8385	-210.336	-236.34
2012-12-20 21:18:40	206.47	232.19	41263.9	11.8455		11.8455	-210.469	-236.687
2012-12-20 21:28:40	206.64	232.45	41263.9	11.8524		11.8524	-210.642	-236.952
2012-12-20 21:38:40	206.75	232.76	41263.9	11.8594		11.8594	-210.754	-237.268
2012-12-20 21:48:40	206.92	233.04	41263.9	11.8663	41263.9	11.8663	-210.928	-237.554
2012-12-20 21:58:40	207.07	233.29	41263.9	11.8733		11.8733	-211.081	-237.808
2012-12-20 22:08:40	207.22	233.6	41263.9	11.8802		11.8802	-211.233	-238.124
2012-12-20 22:18:40	207.32	233.85	41263.9	11.8872		11.8872	-211.335	-238.379
2012-12-20 22:28:40	207.46	234.11	41263.9	11.8941		11.8941	-211.478	-238.644
2012-12-20 22:38:40	207.62	234.48	41263.9	11.901		11.901	-211.641	-239.021
2012-12-20 22:48:40	207.82	234.82	41264	11.908	41264	11.908	-211.845	-239.368
2012-12-20 22:58:40	207.92	235.09	41264	11.9149		11.9149	-211.947	-239.643
2012-12-20 23:08:40	208.05	235.37	41264	11.9219		11.9219	-212.08	-239.929
2012-12-20 23:18:40	208.24	235.71	41264	11.9288		11.9288	-212.273	-240.275
2012-12-20 23:28:40	208.4	235.99	41264	11.9358		11.9358	-212.436	-240.561
2012-12-20 23:38:40	208.56	236.28	41264	11.9427		11.9427	-212.599	-240.856
2012-12-20 23:48:40	208.75	236.56	41264	11.9497	41264	11.9497	-212.793	-241.142
2012-12-20 23:58:40	208.94	236.81	41264	11.9566		11.9566	-212.987	-241.397
2012-12-21 00:08:40	209.02	237.23	41264	11.9635		11.9635	-213.068	-241.825
2012-12-21 00:18:40	209.1	237.31	41264	11.9705		11.9705	-213.15	-241.906
2012-12-21 00:28:40	209.3	237.84	41264	11.9774		11.9774	-213.354	-242.446
2012-12-21 00:38:40	209.49	238.15	41264	11.9844		11.9844	-213.547	-242.762
2012-12-21 00:48:40	209.64	238.34	41264	11.9913	41264	11.9913	-213.7	-242.956
2012-12-21 00:58:40	209.83	238.76	41264	11.9983		11.9983	-213.894	-243.384
2012-12-21 01:08:40	209.89	239.12	41264	12.0052		12.0052	-213.955	-243.751
2012-12-21 01:18:40	210.11	239.44	41264.1	12.0122		12.0122	-214.179	-244.077
2012-12-21 01:28:40	210.27	239.75	41264.1	12.0191		12.0191	-214.343	-244.393
2012-12-21 01:38:40	210.38	240.12	41264.1	12.026		12.026	-214.455	-244.771
2012-12-21 01:48:40	210.54	240.49	41264.1	12.033	41264.1	12.033	-214.618	-245.148
2012-12-21 01:58:40	210.66	240.82	41264.1	12.0399		12.0399	-214.74	-245.484
2012-12-21 02:08:40	210.83	241.07	41264.1	12.0469		12.0469	-214.913	-245.739
2012-12-21 02:18:40	211.04	241.37	41264.1	12.0538		12.0538	-215.127	-246.045
2012-12-21 02:28:40	211.19	241.76	41264.1	12.0608		12.0608	-215.28	-246.442
2012-12-21 02:38:40	211.29	242.1	41264.1	12.0677		12.0677	-215.382	-246.789
2012-12-21 02:48:40	211.43	242.54	41264.1	12.0747	41264.1	12.0747	-215.525	-247.238
2012-12-21 02:58:40	211.54	242.95	41264.1	12.0816		12.0816	-215.637	-247.655
2012-12-21 03:08:40	211.76	243.22	41264.1	12.0885		12.0885	-215.861	-247.931
2012-12-21 03:18:40	211.93	243.7	41264.1	12.0955		12.0955	-216.035	-248.42
2012-12-21 03:28:40	212.05	243.97	41264.1	12.1024		12.1024	-216.157	-248.695
2012-12-21 03:38:40	212.22	244.38	41264.2	12.1094		12.1094	-216.33	-249.113
2012-12-21 03:48:40	212.38	244.72	41264.2	12.1163	41264.2	12.1163	-216.493	-249.46
2012-12-21 03:58:40	212.51	245.09	41264.2	12.1233		12.1233	-216.626	-249.837
2012-12-21 04:08:40	212.72	245.5	41264.2	12.1302		12.1302	-216.84	-250.255
2012-12-21 04:18:40	212.87	245.77	41264.2	12.1372		12.1372	-216.993	-250.53
2012-12-21 04:28:40	213.03	246.13	41264.2	12.1441		12.1441	-217.156	-250.897
2012-12-21 04:38:40	213.14	246.44	41264.2	12.151		12.151	-217.268	-251.213
2012-12-21 04:48:40	213.33	246.97	41264.2	12.158	41264.2	12.158	-217.462	-251.753
2012-12-21 04:58:40	213.55	247.02	41264.2	12.1649		12.1649	-217.686	-251.804
2012-12-21 05:08:40	213.76	247.66	41264.2	12.1719		12.1719	-217.9	-252.457
2012-12-21 05:18:40	213.85	248.09	41264.2	12.1788		12.1788	-217.992	-252.895
2012-12-21 05:28:40	213.99	248.49	41264.2	12.1858		12.1858	-218.135	-253.303
2012-12-21 05:38:40	214.23	248.87	41264.2	12.1927		12.1927	-218.379	-253.69
2012-12-21 05:48:40	214.43	249.21	41264.2	12.1997	41264.2	12.1997	-218.583	-254.037
2012-12-21 05:58:40	212.78	249.63	41264.2	12.2066		12.2066	-216.901	-254.465
2012-12-21 06:08:40	214.73	249.99	41264.3	12.2135		12.2135	-218.889	-254.832
2012-12-21 06:18:40	214.92	250.45	41264.3	12.2205		12.2205	-219.083	-255.301
2012-12-21 06:28:40	215.07	250.82	41264.3	12.2274		12.2274	-219.235	-255.678
2012-12-21 06:38:40	215.29	251.2	41264.3	12.2344		12.2344	-219.46	-256.065
2012-12-21 06:48:40	215.43	251.54	41264.3	12.2413	41264.3	12.2413	-219.602	-256.412
2012-12-21 06:58:40	215.6	251.83	41264.3	12.2483		12.2483	-219.776	-256.707
2012-12-21 07:08:40	215.76	252.24	41264.3	12.2552		12.2552	-219.939	-257.125
2012-12-21 07:18:40	215.9	252.61	41264.3	12.2622		12.2622	-220.082	-257.503
2012-12-21 07:28:40	216.04	252.9	41264.3	12.2691		12.2691	-220.224	-257.798
2012-12-21 07:38:40	216.24	253.29	41264.3	12.276		12.276	-220.428	-258.196
2012-12-21 07:48:40	216.37	253.34	41264.3	12.283	41264.3	12.283	-220.561	-258.247
2012-12-21 07:58:40	216.53	254.06	41264.3	12.2899		12.2899	-220.724	-258.981
2012-12-21 08:08:40	216.59	254.33	41264.3	12.2969		12.2969	-220.785	-259.256
2012-12-21 08:18:40	204.54	229.62	41264.3	12.3038		12.3038	-208.502	-234.067
2012-12-21 08:28:40	214.42	246.94	41264.4	12.3108		12.3108	-218.573	-251.723
2012-12-21 08:38:40	216.29	252.2	41264.4	12.3177		12.3177	-220.479	-257.085
2012-12-21 08:48:40	216.94	254.37	41264.4	12.3247	41264.4	12.3247	-221.142	-259.297
2012-12-21 08:58:40	217.29	255.05	41264.4	12.3316		12.3316	-221.498	-259.99
2012-12-21 09:08:40	217.61	255.68	41264.4	12.3385		12.3385	-221.825	-260.632
2012-12-21 09:18:40	218.06	256.28	41264.4	12.3455		12.3455	-222.283	-261.244
2012-12-21 09:28:40	218.39	256.83	41264.4	12.3524		12.3524	-222.62	-261.804
2012-12-21 09:38:40	218.75	257.43	41264.4	12.3594		12.3594	-222.987	-262.416
2012-12-21 09:48:40	219.04	258.02	41264.4	12.3663	41264.4	12.3663	-223.282	-263.017
2012-12-21 09:58:40	219.36	258.58	41264.4	12.3733		12.3733	-223.609	-263.588
2012-12-21 10:08:40	219.38	259.06	41264.4	12.3802		12.3802	-223.629	-264.077
2012-12-21 10:18:40	219.67	259.37	41264.4	12.3872		12.3872	-223.925	-264.393
2012-12-21 10:28:40	219.97	259.98	41264.4	12.3941		12.3941	-224.23	-265.015
2012-12-21 10:38:40	220.26	260.51	41264.4	12.401		12.401	-224.526	-265.556
2012-12-21 10:48:40	220.47	261.04	41264.5	12.408	41264.5	12.408	-224.74	-266.096
2012-12-21 10:58:40	220.62	261.45	41264.5	12.4149		12.4149	-224.893	-266.514
2012-12-21 11:08:40	220.81	261.95	41264.5	12.4219		12.4219	-225.087	-267.023
2012-12-21 11:18:40	221.03	262.49	41264.5	12.4288		12.4288	-225.311	-267.574
2012-12-21 11:28:40	221.14	262.94	41264.5	12.4358		12.4358	-225.423	-268.033
2012-12-21 11:38:40	221.29	263.37	41264.5	12.4427		12.4427	-225.576	-268.471
2012-12-21 11:48:40	221.6	263.98	41264.5	12.4497	41264.5	12.4497	-225.892	-269.093
2012-12-21 11:58:40	221.77	264.37	41264.5	12.4566		12.4566	-226.065	-269.49
2012-12-21 12:08:40	221.87	264.92	41264.5	12.4635		12.4635	-226.167	-270.051
2012-12-21 12:18:40	222.05	265.2	41264.5	12.4705		12.4705	-226.351	-270.336
2012-12-21 12:28:40	222.23	265.6	41264.5	12.4774		12.4774	-226.534	-270.744
2012-12-21 12:38:40	222.47	266.34	41264.5	12.4844		12.4844	-226.779	-271.498
2012-12-21 12:48:40	222.6	266.81	41264.5	12.4913	41264.5	12.4913	-226.911	-271.978
2012-12-21 12:58:40	222.74	267.24	41264.5	12.4983		12.4983	-227.054	-272.416
2012-12-21 13:08:40	222.95	267.78	41264.5	12.5052		12.5052	-227.268	-272.966
2012-12-21 13:18:40	223.17	268.22	41264.6	12.5122		12.5122	-227.492	-273.415
2012-12-21 13:28:40	223.31	268.76	41264.6	12.5191		12.5191	-227.635	-273.965
2012-12-21 13:38:40	223.42	269.16	41264.6	12.526		12.526	-227.747	-274.373
2012-12-21 13:48:40	223.44	269.66	41264.6	12.533	41264.6	12.533	-227.768	-274.883
2012-12-21 13:58:40	223.7	270.21	41264.6	12.5399		12.5399	-228.033	-275.443
2012-12-21 14:08:40	224.06	270.74	41264.6	12.5469		12.5469	-228.4	-275.984
2012-12-21 14:18:40	224.15	271.26	41264.6	12.5538		12.5538	-228.491	-276.514
2012-12-21 14:28:40	224.45	271.76	41264.6	12.5608		12.5608	-228.797	-277.023
2012-12-21 14:38:40	224.64	272.26	41264.6	12.5677		12.5677	-228.991	-277.533
2012-12-21 14:48:40	224.81	272.72	41264.6	12.5747	41264.6	12.5747	-229.164	-278.002
2012-12-21 14:58:40	224.93	273.27	41264.6	12.5816		12.5816	-229.286	-278.563
2012-12-21 15:08:40	225.11	273.83	41264.6	12.5885		12.5885	-229.47	-279.134
2012-12-21 15:18:40	225.26	274.27	41264.6	12.5955		12.5955	-229.623	-279.582
2012-12-21 15:28:40	225.58	274.83	41264.6	12.6024		12.6024	-229.949	-280.153
2012-12-21 15:38:40	225.71	275.37	41264.7	12.6094		12.6094	-230.082	-280.703
2012-12-21 15:48:40	225.94	275.84	41264.7	12.6163	41264.7	12.6163	-230.316	-281.182
2012-12-21 15:58:40	226.15	276.48	41264.7	12.6233		12.6233	-230.53	-281.835
2012-12-21 16:08:40	226.26	277.03	41264.7	12.6302		12.6302	-230.642	-282.396
2012-12-21 16:18:40	226.51	277.59	41264.7	12.6372		12.6372	-230.897	-282.966
2012-12-21 16:28:40	226.73	278.23	41264.7	12.6441		12.6441	-231.121	-283.619
2012-12-21 16:38:40	226.96	278.75	41264.7	12.651		12.651	-231.356	-284.149
2012-12-21 16:48:40	227.03	279.26	41264.7	12.658	41264.7	12.658	-231.427	-284.669
2012-12-21 16:58:40	227.18	279.88	41264.7	12.6649		12.6649	-231.58	-285.301
2012-12-21 17:08:40	227.26	280.34	41264.7	12.6719		12.6719	-231.662	-285.77
2012-12-21 17:18:40	227.62	280.85	41264.7	12.6788		12.6788	-232.029	-286.29
2012-12-21 17:28:40	227.82	281.4	41264.7	12.6858		12.6858	-232.232	-286.85
2012-12-21 17:38:40	228.07	282.04	41264.7	12.6927		12.6927	-232.487	-287.503
2012-12-21 17:48:40	228.36	282.67	41264.7	12.6997	41264.7	12.6997	-232.783	-288.145
2012-12-21 17:58:40	228.41	283.1	41264.7	12.7066		12.7066	-232.834	-288.583
2012-12-21 18:08:40	228.71	283.75	41264.8	12.7135		12.7135	-233.14	-289.246
2012-12-21 18:18:40	228.91	284.25	41264.8	12.7205		12.7205	-233.344	-289.755
2012-12-21 18:28:40	227.42	283.68	41264.8	12.7274		12.7274	-231.825	-289.174
2012-12-21 18:38:40	229.81	279.84	41264.8	12.7344		12.7344	-234.261	-285.26
2012-12-21 18:48:40	232.57	284.13	41264.8	12.7413	41264.8	12.7413	-237.074	-289.633
2012-12-21 18:58:40	233.83	285.27	41264.8	12.7483		12.7483	-238.359	-290.795
2012-12-21 19:08:40	234.38	286.19	41264.8	12.7552		12.7552	-238.919	-291.733
2012-12-21 19:18:40	235.11	287.03	41264.8	12.7622		12.7622	-239.664	-292.589
2012-12-21 19:28:40	235.47	287.79	41264.8	12.7691		12.7691	-240.031	-293.364
2012-12-21 19:38:40	235.89	288.57	41264.8	12.776		12.776	-240.459	-294.159
2012-12-21 19:48:40	236.27	289.29	41264.8	12.783	41264.8	12.783	-240.846	-294.893
2012-12-21 19:58:40	236.66	289.97	41264.8	12.7899		12.7899	-241.244	-295.586
2012-12-21 20:08:40	236.87	290.46	41264.8	12.7969		12.7969	-241.458	-296.086
2012-12-21 20:18:40	237.15	291.24	41264.8	12.8038		12.8038	-241.743	-296.881
2012-12-21 20:28:40	237.5	291.82	41264.9	12.8108		12.8108	-242.1	-297.472
2012-12-21 20:38:40	237.66	292.55	41264.9	12.8177		12.8177	-242.263	-298.216
2012-12-21 20:48:40	238.01	293.06	41264.9	12.8247	41264.9	12.8247	-242.62	-298.736
2012-12-21 20:58:40	238.2	293.88	41264.9	12.8316		12.8316	-242.813	-299.572
2012-12-21 21:08:40	238.57	294.55	41264.9	12.8385		12.8385	-243.191	-300.255
2012-12-21 21:18:40	238.9	295.08	41264.9	12.8455		12.8455	-243.527	-300.795
2012-12-21 21:28:40	238.45	295.65	41264.9	12.8524		12.8524	-243.068	-301.376
2012-12-21 21:38:40	239.4	296.25	41264.9	12.8594		12.8594	-244.037	-301.988
2012-12-21 21:48:40	239.57	296.99	41264.9	12.8663	41264.9	12.8663	-244.21	-302.742
[truncated: 1,388 more rows]

## Sheet: Tensi
Zeit [d]	MP bot(2) [cm]	MP top(1) [cm]		air entry bot		AE time	AE [cm]	Type	Pos	Weight
0.00692455	-3.63914	-6.16718		2012-12-30 07:28:20	8800	21.2689	-8970.44	1	2	1
0.0555357	-4.78084	-7.32926
0.0972023	-5.60652	-8.14475		air entry top
0.138869	-6.33028	-8.8787		Time		AE time	AE [cm]	Type	Pos	Weight
0.180536	-7.02345	-9.56167		2012-12-26 22:58:40	8800	17.9149	-8970.44	1	1	1
0.222202	-7.49235	-10.0408
0.263869	-7.97146	-10.4995
0.305536	-8.64424	-11.1723
0.347202	-9.27625	-11.7941
0.388869	-9.84709	-12.3649
0.430536	-10.2956	-12.8033
0.472202	-10.3772	-12.8848
0.520813	-11.0296	-13.5372
0.56248	-11.4577	-13.9857
0.604147	-11.9164	-14.4139
0.652758	-12.4363	-14.9439
0.701369	-12.4975	-14.9949
0.743036	-12.9256	-15.4027
0.784702	-13.1397	-15.6371
0.826369	-13.792	-16.2691
0.868036	-14.2406	-16.6972
0.909702	-14.526	-17.0031
0.951369	-14.9337	-17.4108
0.993036	-15.1376	-17.6147
1.0347	-15.4027	-17.8899
1.07637	-15.6881	-18.1651
1.11804	-15.6881	-18.1651
1.1597	-16.1876	-18.6646
1.20137	-16.4832	-18.9602
1.24304	-16.789	-19.2762
1.2847	-16.9011	-19.3782
1.32637	-17.0438	-19.5209
1.36804	-17.1458	-19.6126
1.4097	-17.4414	-19.949
1.45137	-17.5229	-19.9898
1.49304	-17.6249	-20.0917
1.50799	-17.737	-20.2039
1.51216	-17.7778	-20.2548
1.51633	-17.6962	-20.1631
1.52049	-17.7676	-20.2345
1.52466	-17.7778	-20.2548
1.52883	-17.7268	-20.2039
1.53299	-17.8186	-20.2956
1.53716	-17.788	-20.265
1.54133	-17.8287	-20.265
1.54549	-17.8593	-20.3058
1.57466	-18.0632	-20.5301
1.61633	-18.2467	-20.7034
1.65799	-18.4506	-20.9174
1.69966	-18.7258	-21.213
1.74133	-18.9602	-21.4169
1.78299	-19.1743	-21.6616
1.82466	-19.368	-21.8552
1.86633	-19.5515	-22.0489
1.90799	-19.7961	-22.2732
1.94966	-19.9592	-22.4567
1.99133	-20.1427	-22.6198
2.03299	-20.4077	-22.8746
2.07466	-20.6422	-23.1295
2.11633	-20.7747	-23.2212
2.15799	-20.948	-23.4251
2.19966	-20.8461	-23.3129
2.24133	-21.264	-23.7207
2.28299	-21.4577	-23.9246
2.32466	-21.6106	-24.0877
2.36633	-21.8247	-24.2813
2.40799	-21.947	-24.4241
2.44966	-22.1407	-24.5872
2.49133	-22.212	-24.6789
2.53299	-22.4057	-24.893
2.57466	-22.6198	-25.0866
2.61633	-22.8644	-25.3415
2.65799	-22.946	-25.4128
2.69966	-22.7727	-25.2599
2.74133	-23.2416	-25.7085
2.78299	-23.4964	-25.9735
2.82466	-23.8328	-26.2997
2.86633	-24.0265	-26.5036
2.90799	-24.3221	-26.7992
2.94966	-24.5872	-27.0744
2.99133	-24.8624	-27.3496
3.03299	-25.0153	-27.4924
3.07466	-25.2701	-27.7268
3.11633	-25.5046	-27.9918
3.15799	-25.6983	-28.1753
3.19966	-25.8206	-28.3078
3.24133	-26.0856	-28.5729
3.28299	-26.3303	-28.8277
3.32466	-26.5443	-29.052
3.36633	-26.6871	-29.1641
3.40799	-26.9521	-29.419
3.44966	-27.0846	-29.5617
3.49133	-27.2783	-29.7554
3.53299	-27.421	-29.8981
3.57466	-27.6555	-30.1325
3.61633	-27.9409	-30.4077
3.65799	-28.1651	-30.632
3.69966	-28.1957	-30.6626
3.74133	-28.4098	-30.8665
3.78299	-28.6748	-31.1417
3.82466	-28.8685	-31.3354
3.86633	-29.1539	-31.6208
3.90799	-29.3578	-31.8247
3.94966	-29.6126	-32.0897
3.99133	-29.8981	-32.3649
4.03299	-30.1325	-32.5994
4.07466	-30.3772	-32.8542
4.11633	-30.632	-33.1091
4.15799	-30.8767	-33.3537
4.19966	-31.1519	-33.6188
4.24133	-31.3965	-33.8736
4.28299	-31.6922	-34.159
4.32466	-31.9368	-34.4139
4.36633	-32.2222	-34.6993
4.40799	-32.5892	-35.0459
4.44966	-32.895	-35.3517
4.49133	-33.1906	-35.6575
4.53299	-33.211	-35.6779
4.57466	-33.527	-35.9735
4.61633	-33.9857	-36.422
4.65799	-34.3731	-36.8094
4.69966	-34.8318	-37.2885
4.74133	-35.2905	-37.737
4.78299	-35.7492	-38.1957
4.82466	-36.1672	-38.6239
4.86633	-36.6055	-39.0622
4.90799	-37.0133	-39.4801
4.94966	-37.4516	-39.9185
4.99133	-37.8899	-40.3568
5.03299	-38.3486	-40.8257
5.07466	-38.7971	-41.264
5.11633	-39.2864	-41.7533
5.15799	-39.7146	-42.1814
5.19966	-40.1223	-42.5994
5.24133	-40.5505	-43.0275
5.28299	-40.999	-43.476
5.32466	-41.2742	-43.7615
5.36633	-41.6004	-44.0673
5.40799	-41.947	-44.3731
5.44966	-42.3649	-44.8114
5.49133	-42.7319	-45.1784
5.53299	-43.1193	-45.5454
5.57466	-43.629	-46.0652
5.61633	-44.1081	-46.5443
5.65799	-44.6381	-47.0846
5.69966	-45.1988	-47.6453
5.74133	-45.8002	-48.2365
5.78299	-46.2283	-48.6646
5.82466	-46.9113	-49.2966
5.86633	-47.6045	-49.9898
5.90799	-48.3384	-50.7645
5.94966	-49.001	-51.4169
5.99133	-49.5311	-51.9266
6.03299	-50.1733	-52.5994
6.07466	-50.8461	-53.2416
6.11633	-51.4781	-53.8736
6.15799	-52.1611	-54.5566
6.19966	-52.8542	-55.2701
6.24133	-53.5474	-55.9429
6.28299	-54.1998	-56.6157
6.32466	-54.8624	-57.2681
6.36633	-55.5963	-58.002
6.40799	-56.2385	-58.6544
6.44966	-56.8909	-59.3272
6.49133	-57.5025	-59.8879
6.53299	-58.2773	-60.683
6.57466	-59.0316	-61.4271
6.61633	-59.8267	-62.212
6.65799	-60.6422	-63.0377
6.69966	-61.4883	-63.8838
6.74133	-62.4057	-64.8216
6.78299	-63.4149	-65.8308
6.82466	-64.4139	-66.8196
6.86633	-65.423	-67.8084
6.90799	-66.473	-68.8379
6.94966	-67.472	-69.8777
6.99133	-68.4811	-70.8869
7.03299	-69.5311	-71.9368
7.07466	-70.6116	-73.0275
7.11633	-71.7533	-74.159
7.15799	-72.844	-75.2599
7.19966	-73.945	-76.3303
7.24133	-75.0153	-77.4312
7.28299	-76.1162	-78.5423
7.32466	-77.156	-79.5719
7.36633	-78.2569	-80.6932
7.40799	-79.3782	-81.7941
7.44966	-80.4791	-82.895
7.49133	-81.5494	-84.0265
7.53299	-82.7625	-85.1682
7.57466	-83.9857	-86.473
7.61633	-85.2803	-87.7472
7.65799	-86.473	-88.9501
7.69966	-87.7982	-90.2752
7.74133	-89.1947	-91.6616
7.78299	-90.5912	-93.0785
7.82466	-91.8451	-94.3323
7.86633	-93.2824	-95.79
7.90799	-94.8114	-97.3191
7.94966	-96.2283	-98.7258
7.99133	-97.788	-100.306
8.03299	-99.2864	-101.794
8.07466	-100.856	-103.374
8.11633	-102.559	-105.097
8.15799	-104.098	-106.606
8.19966	-105.77	-108.328
8.24133	-107.533	-110.133
8.28299	-109.439	-112.018
8.32466	-111.315	-113.935
8.36633	-113.221	-115.882
8.40799	-115.076	-117.768
8.44966	-116.871	-119.582
8.49133	-118.828	-121.519
8.53299	-120.734	-123.456
8.57466	-122.62	-125.362
8.61633	-124.434	-127.197
8.65799	-126.279	-129.062
8.69966	-128.033	-130.836
8.74133	-129.827	-132.661
8.78299	-131.651	-134.557
8.82466	-133.445	-136.391
8.86633	-135.209	-138.196
8.90799	-136.972	-140
8.94966	-138.644	-141.713
8.99133	-140.265	-143.415
9.03299	-141.886	-145.097
9.07466	-143.466	-146.758
9.11633	-144.975	-148.318
9.15799	-146.442	-148.899
9.19966	-147.88	-151.376
9.24133	-149.256	-152.854
9.28299	-150.571	-154.22
9.32466	-151.835	-155.668
9.36633	-153.109	-157.023
9.40799	-154.312	-158.308
9.44966	-155.535	-159.704
9.49133	-156.707	-160.968
9.53299	-157.89	-162.314
9.57466	-159.042	-163.609
9.61633	-160.163	-164.883
9.65799	-161.274	-166.249
9.69966	-162.375	-167.523
9.74133	-163.435	-168.807
9.78299	-164.506	-170.092
9.82466	-165.556	-171.366
9.86633	-166.606	-172.681
9.90799	-167.615	-173.925
9.94966	-168.614	-175.209
9.99133	-169.562	-176.453
10.033	-170.479	-177.717
10.0747	-171.356	-178.869
10.1163	-172.263	-180.143
10.158	-173.119	-181.366
10.1997	-174.006	-182.61
10.2413	-174.811	-183.863
10.283	-175.627	-185.097
10.3247	-176.524	-186.402
10.3663	-177.339	-187.696
10.408	-178.135	-188.93
10.4497	-178.95	-190.133
10.4913	-179.725	-191.529
10.533	-180.53	-192.762
10.5747	-181.305	-194.016
10.6163	-182.069	-195.321
10.658	-182.13	-195.556
10.6997	-184.302	-197.829
10.7413	-185.127	-199.123
10.783	-185.973	-200.438
10.8247	-186.728	-201.804
10.8663	-187.492	-203.089
10.908	-188.359	-204.444
10.9497	-188.97	-205.607
10.9913	-189.847	-206.932
11.033	-190.612	-208.226
11.0747	-191.376	-209.439
11.1163	-192.11	-210.775
11.158	-192.864	-212.151
11.1997	-193.629	-213.456
11.2413	-194.332	-214.791
11.283	-194.913	-215.933
11.3247	-197.574	-216.86
11.3663	-199.011	-218.41
11.408	-199.664	-219.735
11.4497	-199.817	-220.642
11.4913	-201.478	-221.549
11.533	-203.649	-223.527
11.5747	-204.689	-225.27
11.6163	-205.678	-226.972
11.658	-206.504	-228.624
11.6997	-206.972	-230.285
11.7413	-208.063	-232.161
11.783	-208.848	-233.843
11.8247	-209.949	-235.698
11.8663	-210.928	-237.554
11.908	-211.845	-239.368
11.9497	-212.793	-241.142
11.9913	-213.7	-242.956
12.033	-214.618	-245.148
12.0747	-215.525	-247.238
12.1163	-216.493	-249.46
12.158	-217.462	-251.753
12.1997	-218.583	-254.037
12.2413	-219.602	-256.412
12.283	-220.561	-258.247
12.3247	-221.142	-259.297
12.3663	-223.282	-263.017
12.408	-224.74	-266.096
12.4497	-225.892	-269.093
12.4913	-226.911	-271.978
12.533	-227.768	-274.883
12.5747	-229.164	-278.002
12.6163	-230.316	-281.182
12.658	-231.427	-284.669
12.6997	-232.783	-288.145
12.7413	-237.074	-289.633
12.783	-240.846	-294.893
12.8247	-242.62	-298.736
12.8663	-244.21	-302.742
12.908	-245.708	-306.718
12.9497	-246.86	-310.724
12.9913	-248.654	-314.822
13.033	-250.173	-318.481
13.0747	-251.611	-323.048
13.1163	-252.885	-327.299
13.158	-254.618	-331.896
13.1997	-256.177	-336.544
13.2413	-257.829	-341.091
13.283	-259.409	-345.902
13.3247	-261.274	-351.101
13.3663	-263.119	-356.473
13.408	-264.638	-361.509
13.4497	-265.963	-367.207
13.4913	-268.104	-373.71
13.533	-269.847	-380.265
13.5747	-272.008	-387.023
13.6163	-274.169	-393.67
13.658	-276.218	-400.826
13.6997	-278.44	-408.206
13.7413	-281.233	-415.861
13.783	-284.332	-420.153
13.8247	-288.522	-430.754
13.8663	-290.907	-439.46
13.908	-293.374	-447.513
13.9497	-295.668	-455.545
13.9913	-297.859	-465.413
14.033	-300.54	-474.251
14.0747	-302.599	-483.802
14.1163	-305.331	-493.496
14.158	-308.726	-503.578
14.1997	-311.988	-513.405
14.2413	-315.78	-524.913
14.283	-318.736	-534.801
14.3247	-283.598	-442.905
14.3663	-335.301	-553.394
14.408	-344.873	-568.899
14.4497	-350.153	-584.2
14.4913	-354.251	-597.859
14.533	-358.338	-611.825
14.5747	-359.266	-624.322
14.6163	-365.923	-640.183
14.658	-370.724	-656.137
14.6997	-376.096	-671.978
14.7413	-380.061	-688.532
14.783	-383.935	-699.939
14.8247	-388.94	-719.256
14.8663	-394.067	-737.339
14.908	-401.121	-755.464
14.9497	-409.215	-774.903
14.9913	-417.278	-797.421
15.033	-425.953	-819.827
15.0747	-435.107	-842.487
15.1163	-443.507	-866.279
15.158	-453.191	-887.89
15.1997	-462.895	-914.73
15.2413	-473.364	-941.162
15.283	-484.669	-966.728
15.3247	-496.412	-995.025
15.3663	-509.052	-1024.28
15.408	-519.898	-1057.06
15.4497	-532.09	-1089.25
15.4913	-546.463	-1124.28
15.533	-563.945	-1161.09
15.5747	-580.214	-1183.12
15.6163	-594.475	-1227.66
15.658	-609.215	-1267.77
15.6997	-625.036	-1310.93
15.7483	-642.62	-1359.91
15.783	-663.558
15.8247	-687.074
15.8663	-710.765
15.908	-733.16
15.9219	-742.334

## Sheet: HYDRUS
Data für die Zielfunktion: 2 x Tensionen, 1 x Endwassergehalt						Verdunstungsrate
Time	Obs	Type	Pos	Weight		Zeitintervall		Evarate [cm/d]	hCritA [cm]		Type	1-Tension	2-Wassergehalt
0.00692455	-3.63914	1	2	1		0.453459	0	0.449432	100000		Pos	1-top	2-bot	(von oben nach unten)
0.0555357	-4.78084	1	2	1		0.782434	0	0.407376	100000		34	Time-Variable boundary conditions+
0.0972023	-5.60652	1	2	1		1.64072	0	0.251167	100000		22.765	Final Time	Time Information
0.138869	-6.33028	1	2	1		1.98566	0	0.339813	100000		815	Inverse Data Points
0.180536	-7.02345	1	2	1		2.21491	0	0.324462	100000		56.7822	BC-top	[hPa]
0.222202	-7.49235	1	2	1		2.74573	0	0.336632	100000		58.0322	tens_top_ini	[hPa]	1
0.263869	-7.97146	1	2	1		2.97734	0	0.353015	100000		121.309	tens_bot_ini	[hPa]	2
0.305536	-8.64424	1	2	1		3.63974	0	0.386693	100000		122.559	BC-bot	[hPa]
0.347202	-9.27625	1	2	1		3.97759	0	0.373635	100000
0.388869	-9.84709	1	2	1		4.66375	0	0.35001	100000		-7.24388
0.430536	-10.2956	1	2	1		5.16509	0	0.382582	100000		-5.99388
0.472202	-10.3772	1	2	1		5.63911	0	0.380419	100000		-3.46585
0.520813	-11.0296	1	2	1		6.08337	0	0.339947	100000		-2.21585
0.56248	-11.4577	1	2	1		6.73899	0	0.321619	100000
0.604147	-11.9164	1	2	1		7.86008	0	0.287522	100000
0.652758	-12.4363	1	2	1		8.62524	0	0.286556	100000
0.701369	-12.4975	1	2	1		9.60219	0	0.264919	100000
0.743036	-12.9256	1	2	1		9.93456	0	0.257093	100000
0.784702	-13.1397	1	2	1		10.5883	0	0.255163	100000
0.826369	-13.792	1	2	1		10.9446	0	0.261067	100000
0.868036	-14.2406	1	2	1		11.5993	0	0.244146	100000
0.909702	-14.526	1	2	1		11.9733	0	0.243254	100000
0.951369	-14.9337	1	2	1		12.5927	0	0.213389	100000
0.993036	-15.1376	1	2	1		13.0189	0	0.190396	100000
1.0347	-15.4027	1	2	1		13.6576	0	0.160094	100000
1.07637	-15.6881	1	2	1		14.0527	0	0.133809	100000
1.11804	-15.6881	1	2	1		14.6149	0	0.115915	100000
1.1597	-16.1876	1	2	1		16.7385	0	0.0861725	100000
1.20137	-16.4832	1	2	1		17.86	0	0.0707102	100000
1.24304	-16.789	1	2	1		18.7499	0	0.0619404	100000
1.2847	-16.9011	1	2	1		19.0073	0	0.0565244	100000
1.32637	-17.0438	1	2	1		19.6541	0	0.0570307	100000
1.36804	-17.1458	1	2	1		20.6515	0	0.0495156	100000
1.4097	-17.4414	1	2	1		22.765	0	0.034343	100000
1.45137	-17.5229	1	2	1
1.49304	-17.6249	1	2	1
1.50799	-17.737	1	2	1
1.51216	-17.7778	1	2	1
1.51633	-17.6962	1	2	1
1.52049	-17.7676	1	2	1
1.52466	-17.7778	1	2	1
1.52883	-17.7268	1	2	1
1.53299	-17.8186	1	2	1
1.53716	-17.788	1	2	1
1.54133	-17.8287	1	2	1
1.54549	-17.8593	1	2	1
1.57466	-18.0632	1	2	1
1.61633	-18.2467	1	2	1
1.65799	-18.4506	1	2	1
1.69966	-18.7258	1	2	1
1.74133	-18.9602	1	2	1
1.78299	-19.1743	1	2	1
1.82466	-19.368	1	2	1
1.86633	-19.5515	1	2	1
1.90799	-19.7961	1	2	1
1.94966	-19.9592	1	2	1
1.99133	-20.1427	1	2	1
2.03299	-20.4077	1	2	1
2.07466	-20.6422	1	2	1
2.11633	-20.7747	1	2	1
2.15799	-20.948	1	2	1
2.19966	-20.8461	1	2	1
2.24133	-21.264	1	2	1
2.28299	-21.4577	1	2	1
2.32466	-21.6106	1	2	1
2.36633	-21.8247	1	2	1
2.40799	-21.947	1	2	1
2.44966	-22.1407	1	2	1
2.49133	-22.212	1	2	1
2.53299	-22.4057	1	2	1
2.57466	-22.6198	1	2	1
2.61633	-22.8644	1	2	1
2.65799	-22.946	1	2	1
2.69966	-22.7727	1	2	1
2.74133	-23.2416	1	2	1
2.78299	-23.4964	1	2	1
2.82466	-23.8328	1	2	1
2.86633	-24.0265	1	2	1
2.90799	-24.3221	1	2	1
2.94966	-24.5872	1	2	1
2.99133	-24.8624	1	2	1
3.03299	-25.0153	1	2	1
3.07466	-25.2701	1	2	1
3.11633	-25.5046	1	2	1
3.15799	-25.6983	1	2	1
3.19966	-25.8206	1	2	1
3.24133	-26.0856	1	2	1
3.28299	-26.3303	1	2	1
3.32466	-26.5443	1	2	1
3.36633	-26.6871	1	2	1
3.40799	-26.9521	1	2	1
3.44966	-27.0846	1	2	1
3.49133	-27.2783	1	2	1
3.53299	-27.421	1	2	1
3.57466	-27.6555	1	2	1
3.61633	-27.9409	1	2	1
3.65799	-28.1651	1	2	1
3.69966	-28.1957	1	2	1
3.74133	-28.4098	1	2	1
3.78299	-28.6748	1	2	1
3.82466	-28.8685	1	2	1
3.86633	-29.1539	1	2	1
3.90799	-29.3578	1	2	1
3.94966	-29.6126	1	2	1
3.99133	-29.8981	1	2	1
4.03299	-30.1325	1	2	1
4.07466	-30.3772	1	2	1
4.11633	-30.632	1	2	1
4.15799	-30.8767	1	2	1
4.19966	-31.1519	1	2	1
4.24133	-31.3965	1	2	1
4.28299	-31.6922	1	2	1
4.32466	-31.9368	1	2	1
4.36633	-32.2222	1	2	1
4.40799	-32.5892	1	2	1
4.44966	-32.895	1	2	1
4.49133	-33.1906	1	2	1
4.53299	-33.211	1	2	1
4.57466	-33.527	1	2	1
4.61633	-33.9857	1	2	1
4.65799	-34.3731	1	2	1
4.69966	-34.8318	1	2	1
4.74133	-35.2905	1	2	1
4.78299	-35.7492	1	2	1
4.82466	-36.1672	1	2	1
4.86633	-36.6055	1	2	1
4.90799	-37.0133	1	2	1
4.94966	-37.4516	1	2	1
4.99133	-37.8899	1	2	1
5.03299	-38.3486	1	2	1
5.07466	-38.7971	1	2	1
5.11633	-39.2864	1	2	1
5.15799	-39.7146	1	2	1
5.19966	-40.1223	1	2	1
5.24133	-40.5505	1	2	1
5.28299	-40.999	1	2	1
5.32466	-41.2742	1	2	1
5.36633	-41.6004	1	2	1
5.40799	-41.947	1	2	1
5.44966	-42.3649	1	2	1
5.49133	-42.7319	1	2	1
5.53299	-43.1193	1	2	1
5.57466	-43.629	1	2	1
5.61633	-44.1081	1	2	1
5.65799	-44.6381	1	2	1
5.69966	-45.1988	1	2	1
5.74133	-45.8002	1	2	1
5.78299	-46.2283	1	2	1
5.82466	-46.9113	1	2	1
5.86633	-47.6045	1	2	1
5.90799	-48.3384	1	2	1
5.94966	-49.001	1	2	1
5.99133	-49.5311	1	2	1
6.03299	-50.1733	1	2	1
6.07466	-50.8461	1	2	1
6.11633	-51.4781	1	2	1
6.15799	-52.1611	1	2	1
6.19966	-52.8542	1	2	1
6.24133	-53.5474	1	2	1
6.28299	-54.1998	1	2	1
6.32466	-54.8624	1	2	1
6.36633	-55.5963	1	2	1
6.40799	-56.2385	1	2	1
6.44966	-56.8909	1	2	1
6.49133	-57.5025	1	2	1
6.53299	-58.2773	1	2	1
6.57466	-59.0316	1	2	1
6.61633	-59.8267	1	2	1
6.65799	-60.6422	1	2	1
6.69966	-61.4883	1	2	1
6.74133	-62.4057	1	2	1
6.78299	-63.4149	1	2	1
6.82466	-64.4139	1	2	1
6.86633	-65.423	1	2	1
6.90799	-66.473	1	2	1
6.94966	-67.472	1	2	1
6.99133	-68.4811	1	2	1
7.03299	-69.5311	1	2	1
7.07466	-70.6116	1	2	1
7.11633	-71.7533	1	2	1
7.15799	-72.844	1	2	1
7.19966	-73.945	1	2	1
7.24133	-75.0153	1	2	1
7.28299	-76.1162	1	2	1
7.32466	-77.156	1	2	1
7.36633	-78.2569	1	2	1
7.40799	-79.3782	1	2	1
7.44966	-80.4791	1	2	1
7.49133	-81.5494	1	2	1
7.53299	-82.7625	1	2	1
7.57466	-83.9857	1	2	1
7.61633	-85.2803	1	2	1
7.65799	-86.473	1	2	1
7.69966	-87.7982	1	2	1
7.74133	-89.1947	1	2	1
7.78299	-90.5912	1	2	1
7.82466	-91.8451	1	2	1
7.86633	-93.2824	1	2	1
7.90799	-94.8114	1	2	1
7.94966	-96.2283	1	2	1
7.99133	-97.788	1	2	1
8.03299	-99.2864	1	2	1
8.07466	-100.856	1	2	1
8.11633	-102.559	1	2	1
8.15799	-104.098	1	2	1
8.19966	-105.77	1	2	1
8.24133	-107.533	1	2	1
8.28299	-109.439	1	2	1
8.32466	-111.315	1	2	1
8.36633	-113.221	1	2	1
8.40799	-115.076	1	2	1
8.44966	-116.871	1	2	1
8.49133	-118.828	1	2	1
8.53299	-120.734	1	2	1
8.57466	-122.62	1	2	1
8.61633	-124.434	1	2	1
8.65799	-126.279	1	2	1
8.69966	-128.033	1	2	1
8.74133	-129.827	1	2	1
8.78299	-131.651	1	2	1
8.82466	-133.445	1	2	1
8.86633	-135.209	1	2	1
8.90799	-136.972	1	2	1
8.94966	-138.644	1	2	1
8.99133	-140.265	1	2	1
9.03299	-141.886	1	2	1
9.07466	-143.466	1	2	1
9.11633	-144.975	1	2	1
9.15799	-146.442	1	2	1
9.19966	-147.88	1	2	1
9.24133	-149.256	1	2	1
9.28299	-150.571	1	2	1
9.32466	-151.835	1	2	1
9.36633	-153.109	1	2	1
9.40799	-154.312	1	2	1
9.44966	-155.535	1	2	1
9.49133	-156.707	1	2	1
9.53299	-157.89	1	2	1
9.57466	-159.042	1	2	1
9.61633	-160.163	1	2	1
9.65799	-161.274	1	2	1
9.69966	-162.375	1	2	1
9.74133	-163.435	1	2	1
9.78299	-164.506	1	2	1
9.82466	-165.556	1	2	1
9.86633	-166.606	1	2	1
9.90799	-167.615	1	2	1
9.94966	-168.614	1	2	1
9.99133	-169.562	1	2	1
10.033	-170.479	1	2	1
10.0747	-171.356	1	2	1
10.1163	-172.263	1	2	1
10.158	-173.119	1	2	1
10.1997	-174.006	1	2	1
10.2413	-174.811	1	2	1
10.283	-175.627	1	2	1
10.3247	-176.524	1	2	1
10.3663	-177.339	1	2	1
10.408	-178.135	1	2	1
10.4497	-178.95	1	2	1
10.4913	-179.725	1	2	1
10.533	-180.53	1	2	1
10.5747	-181.305	1	2	1
10.6163	-182.069	1	2	1
10.658	-182.13	1	2	1
10.6997	-184.302	1	2	1
10.7413	-185.127	1	2	1
10.783	-185.973	1	2	1
10.8247	-186.728	1	2	1
10.8663	-187.492	1	2	1
10.908	-188.359	1	2	1
10.9497	-188.97	1	2	1
10.9913	-189.847	1	2	1
11.033	-190.612	1	2	1
11.0747	-191.376	1	2	1
11.1163	-192.11	1	2	1
11.158	-192.864	1	2	1
11.1997	-193.629	1	2	1
11.2413	-194.332	1	2	1
11.283	-194.913	1	2	1
11.3247	-197.574	1	2	1
11.3663	-199.011	1	2	1
11.408	-199.664	1	2	1
11.4497	-199.817	1	2	1
11.4913	-201.478	1	2	1
11.533	-203.649	1	2	1
11.5747	-204.689	1	2	1
11.6163	-205.678	1	2	1
11.658	-206.504	1	2	1
11.6997	-206.972	1	2	1
11.7413	-208.063	1	2	1
11.783	-208.848	1	2	1
11.8247	-209.949	1	2	1
11.8663	-210.928	1	2	1
11.908	-211.845	1	2	1
11.9497	-212.793	1	2	1
11.9913	-213.7	1	2	1
12.033	-214.618	1	2	1
12.0747	-215.525	1	2	1
12.1163	-216.493	1	2	1
12.158	-217.462	1	2	1
12.1997	-218.583	1	2	1
12.2413	-219.602	1	2	1
12.283	-220.561	1	2	1
12.3247	-221.142	1	2	1
12.3663	-223.282	1	2	1
12.408	-224.74	1	2	1
12.4497	-225.892	1	2	1
12.4913	-226.911	1	2	1
12.533	-227.768	1	2	1
12.5747	-229.164	1	2	1
12.6163	-230.316	1	2	1
12.658	-231.427	1	2	1
12.6997	-232.783	1	2	1
12.7413	-237.074	1	2	1
12.783	-240.846	1	2	1
12.8247	-242.62	1	2	1
12.8663	-244.21	1	2	1
12.908	-245.708	1	2	1
12.9497	-246.86	1	2	1
12.9913	-248.654	1	2	1
13.033	-250.173	1	2	1
13.0747	-251.611	1	2	1
13.1163	-252.885	1	2	1
13.158	-254.618	1	2	1
13.1997	-256.177	1	2	1
13.2413	-257.829	1	2	1
13.283	-259.409	1	2	1
13.3247	-261.274	1	2	1
13.3663	-263.119	1	2	1
13.408	-264.638	1	2	1
13.4497	-265.963	1	2	1
13.4913	-268.104	1	2	1
13.533	-269.847	1	2	1
13.5747	-272.008	1	2	1
13.6163	-274.169	1	2	1
13.658	-276.218	1	2	1
13.6997	-278.44	1	2	1
13.7413	-281.233	1	2	1
13.783	-284.332	1	2	1
13.8247	-288.522	1	2	1
13.8663	-290.907	1	2	1
13.908	-293.374	1	2	1
13.9497	-295.668	1	2	1
13.9913	-297.859	1	2	1
14.033	-300.54	1	2	1
14.0747	-302.599	1	2	1
14.1163	-305.331	1	2	1
14.158	-308.726	1	2	1
14.1997	-311.988	1	2	1
14.2413	-315.78	1	2	1
14.283	-318.736	1	2	1
14.3247	-283.598	1	2	1
14.3663	-335.301	1	2	1
14.408	-344.873	1	2	1
14.4497	-350.153	1	2	1
14.4913	-354.251	1	2	1
14.533	-358.338	1	2	1
14.5747	-359.266	1	2	1
14.6163	-365.923	1	2	1
14.658	-370.724	1	2	1
14.6997	-376.096	1	2	1
14.7413	-380.061	1	2	1
14.783	-383.935	1	2	1
14.8247	-388.94	1	2	1
14.8663	-394.067	1	2	1
14.908	-401.121	1	2	1
14.9497	-409.215	1	2	1
14.9913	-417.278	1	2	1
15.033	-425.953	1	2	1
15.0747	-435.107	1	2	1
15.1163	-443.507	1	2	1
15.158	-453.191	1	2	1
15.1997	-462.895	1	2	1
15.2413	-473.364	1	2	1
15.283	-484.669	1	2	1
15.3247	-496.412	1	2	1
15.3663	-509.052	1	2	1
15.408	-519.898	1	2	1
15.4497	-532.09	1	2	1
15.4913	-546.463	1	2	1
15.533	-563.945	1	2	1
15.5747	-580.214	1	2	1
15.6163	-594.475	1	2	1
15.658	-609.215	1	2	1
15.6997	-625.036	1	2	1
15.7483	-642.62	1	2	1
15.783	-663.558	1	2	1
15.8247	-687.074	1	2	1
15.8663	-710.765	1	2	1
15.908	-733.16	1	2	1
15.9219	-742.334	1	2	1
21.2689	-8970.44	1	2	1
0.00692455	-6.16718	1	1	1
0.0555357	-7.32926	1	1	1
0.0972023	-8.14475	1	1	1
0.138869	-8.8787	1	1	1
0.180536	-9.56167	1	1	1
0.222202	-10.0408	1	1	1
0.263869	-10.4995	1	1	1
0.305536	-11.1723	1	1	1
0.347202	-11.7941	1	1	1
0.388869	-12.3649	1	1	1
0.430536	-12.8033	1	1	1
0.472202	-12.8848	1	1	1
0.520813	-13.5372	1	1	1
0.56248	-13.9857	1	1	1
0.604147	-14.4139	1	1	1
0.652758	-14.9439	1	1	1
0.701369	-14.9949	1	1	1
0.743036	-15.4027	1	1	1
0.784702	-15.6371	1	1	1
0.826369	-16.2691	1	1	1
0.868036	-16.6972	1	1	1
0.909702	-17.0031	1	1	1
0.951369	-17.4108	1	1	1
0.993036	-17.6147	1	1	1
1.0347	-17.8899	1	1	1
1.07637	-18.1651	1	1	1
1.11804	-18.1651	1	1	1
1.1597	-18.6646	1	1	1
1.20137	-18.9602	1	1	1
1.24304	-19.2762	1	1	1
1.2847	-19.3782	1	1	1
1.32637	-19.5209	1	1	1
1.36804	-19.6126	1	1	1
1.4097	-19.949	1	1	1
1.45137	-19.9898	1	1	1
1.49304	-20.0917	1	1	1
1.50799	-20.2039	1	1	1
1.51216	-20.2548	1	1	1
1.51633	-20.1631	1	1	1
1.52049	-20.2345	1	1	1
1.52466	-20.2548	1	1	1
1.52883	-20.2039	1	1	1
1.53299	-20.2956	1	1	1
1.53716	-20.265	1	1	1
1.54133	-20.265	1	1	1
1.54549	-20.3058	1	1	1
1.57466	-20.5301	1	1	1
1.61633	-20.7034	1	1	1
1.65799	-20.9174	1	1	1
1.69966	-21.213	1	1	1
1.74133	-21.4169	1	1	1
1.78299	-21.6616	1	1	1
1.82466	-21.8552	1	1	1
1.86633	-22.0489	1	1	1
1.90799	-22.2732	1	1	1
1.94966	-22.4567	1	1	1
1.99133	-22.6198	1	1	1
2.03299	-22.8746	1	1	1
2.07466	-23.1295	1	1	1
2.11633	-23.2212	1	1	1
2.15799	-23.4251	1	1	1
2.19966	-23.3129	1	1	1
2.24133	-23.7207	1	1	1
2.28299	-23.9246	1	1	1
2.32466	-24.0877	1	1	1
2.36633	-24.2813	1	1	1
2.40799	-24.4241	1	1	1
2.44966	-24.5872	1	1	1
2.49133	-24.6789	1	1	1
2.53299	-24.893	1	1	1
2.57466	-25.0866	1	1	1
2.61633	-25.3415	1	1	1
2.65799	-25.4128	1	1	1
2.69966	-25.2599	1	1	1
2.74133	-25.7085	1	1	1
2.78299	-25.9735	1	1	1
2.82466	-26.2997	1	1	1
2.86633	-26.5036	1	1	1
2.90799	-26.7992	1	1	1
2.94966	-27.0744	1	1	1
2.99133	-27.3496	1	1	1
3.03299	-27.4924	1	1	1
3.07466	-27.7268	1	1	1
3.11633	-27.9918	1	1	1
3.15799	-28.1753	1	1	1
3.19966	-28.3078	1	1	1
3.24133	-28.5729	1	1	1
3.28299	-28.8277	1	1	1
3.32466	-29.052	1	1	1
3.36633	-29.1641	1	1	1
3.40799	-29.419	1	1	1
3.44966	-29.5617	1	1	1
3.49133	-29.7554	1	1	1
3.53299	-29.8981	1	1	1
3.57466	-30.1325	1	1	1
3.61633	-30.4077	1	1	1
3.65799	-30.632	1	1	1
3.69966	-30.6626	1	1	1
3.74133	-30.8665	1	1	1
3.78299	-31.1417	1	1	1
3.82466	-31.3354	1	1	1
3.86633	-31.6208	1	1	1
3.90799	-31.8247	1	1	1
3.94966	-32.0897	1	1	1
3.99133	-32.3649	1	1	1
4.03299	-32.5994	1	1	1
4.07466	-32.8542	1	1	1
4.11633	-33.1091	1	1	1
4.15799	-33.3537	1	1	1
4.19966	-33.6188	1	1	1
4.24133	-33.8736	1	1	1
4.28299	-34.159	1	1	1
4.32466	-34.4139	1	1	1
4.36633	-34.6993	1	1	1
4.40799	-35.0459	1	1	1
4.44966	-35.3517	1	1	1
4.49133	-35.6575	1	1	1
4.53299	-35.6779	1	1	1
4.57466	-35.9735	1	1	1
4.61633	-36.422	1	1	1
4.65799	-36.8094	1	1	1
4.69966	-37.2885	1	1	1
4.74133	-37.737	1	1	1
4.78299	-38.1957	1	1	1
4.82466	-38.6239	1	1	1
4.86633	-39.0622	1	1	1
4.90799	-39.4801	1	1	1
4.94966	-39.9185	1	1	1
4.99133	-40.3568	1	1	1
5.03299	-40.8257	1	1	1
5.07466	-41.264	1	1	1
5.11633	-41.7533	1	1	1
5.15799	-42.1814	1	1	1
5.19966	-42.5994	1	1	1
5.24133	-43.0275	1	1	1
5.28299	-43.476	1	1	1
5.32466	-43.7615	1	1	1
5.36633	-44.0673	1	1	1
5.40799	-44.3731	1	1	1
5.44966	-44.8114	1	1	1
5.49133	-45.1784	1	1	1
5.53299	-45.5454	1	1	1
5.57466	-46.0652	1	1	1
5.61633	-46.5443	1	1	1
5.65799	-47.0846	1	1	1
5.69966	-47.6453	1	1	1
5.74133	-48.2365	1	1	1
5.78299	-48.6646	1	1	1
5.82466	-49.2966	1	1	1
5.86633	-49.9898	1	1	1
5.90799	-50.7645	1	1	1
5.94966	-51.4169	1	1	1
5.99133	-51.9266	1	1	1
6.03299	-52.5994	1	1	1
6.07466	-53.2416	1	1	1
6.11633	-53.8736	1	1	1
6.15799	-54.5566	1	1	1
6.19966	-55.2701	1	1	1
6.24133	-55.9429	1	1	1
6.28299	-56.6157	1	1	1
6.32466	-57.2681	1	1	1
6.36633	-58.002	1	1	1
6.40799	-58.6544	1	1	1
6.44966	-59.3272	1	1	1
6.49133	-59.8879	1	1	1
6.53299	-60.683	1	1	1
6.57466	-61.4271	1	1	1
6.61633	-62.212	1	1	1
6.65799	-63.0377	1	1	1
6.69966	-63.8838	1	1	1
6.74133	-64.8216	1	1	1
6.78299	-65.8308	1	1	1
6.82466	-66.8196	1	1	1
6.86633	-67.8084	1	1	1
6.90799	-68.8379	1	1	1
6.94966	-69.8777	1	1	1
6.99133	-70.8869	1	1	1
7.03299	-71.9368	1	1	1
7.07466	-73.0275	1	1	1
7.11633	-74.159	1	1	1
7.15799	-75.2599	1	1	1
7.19966	-76.3303	1	1	1
7.24133	-77.4312	1	1	1
7.28299	-78.5423	1	1	1
7.32466	-79.5719	1	1	1
7.36633	-80.6932	1	1	1
7.40799	-81.7941	1	1	1
7.44966	-82.895	1	1	1
7.49133	-84.0265	1	1	1
7.53299	-85.1682	1	1	1
7.57466	-86.473	1	1	1
7.61633	-87.7472	1	1	1
7.65799	-88.9501	1	1	1
7.69966	-90.2752	1	1	1
7.74133	-91.6616	1	1	1
7.78299	-93.0785	1	1	1
7.82466	-94.3323	1	1	1
7.86633	-95.79	1	1	1
7.90799	-97.3191	1	1	1
7.94966	-98.7258	1	1	1
7.99133	-100.306	1	1	1
8.03299	-101.794	1	1	1
8.07466	-103.374	1	1	1
8.11633	-105.097	1	1	1
8.15799	-106.606	1	1	1
8.19966	-108.328	1	1	1
8.24133	-110.133	1	1	1
8.28299	-112.018	1	1	1
8.32466	-113.935	1	1	1
8.36633	-115.882	1	1	1
8.40799	-117.768	1	1	1
8.44966	-119.582	1	1	1
8.49133	-121.519	1	1	1
8.53299	-123.456	1	1	1
8.57466	-125.362	1	1	1
8.61633	-127.197	1	1	1
8.65799	-129.062	1	1	1
8.69966	-130.836	1	1	1
8.74133	-132.661	1	1	1
8.78299	-134.557	1	1	1
8.82466	-136.391	1	1	1
8.86633	-138.196	1	1	1
8.90799	-140	1	1	1
8.94966	-141.713	1	1	1
8.99133	-143.415	1	1	1
9.03299	-145.097	1	1	1
9.07466	-146.758	1	1	1
9.11633	-148.318	1	1	1
9.15799	-148.899	1	1	1
9.19966	-151.376	1	1	1
9.24133	-152.854	1	1	1
9.28299	-154.22	1	1	1
9.32466	-155.668	1	1	1
9.36633	-157.023	1	1	1
9.40799	-158.308	1	1	1
9.44966	-159.704	1	1	1
9.49133	-160.968	1	1	1
9.53299	-162.314	1	1	1
9.57466	-163.609	1	1	1
9.61633	-164.883	1	1	1
9.65799	-166.249	1	1	1
9.69966	-167.523	1	1	1
9.74133	-168.807	1	1	1
9.78299	-170.092	1	1	1
9.82466	-171.366	1	1	1
9.86633	-172.681	1	1	1
9.90799	-173.925	1	1	1
9.94966	-175.209	1	1	1
9.99133	-176.453	1	1	1
10.033	-177.717	1	1	1
10.0747	-178.869	1	1	1
10.1163	-180.143	1	1	1
10.158	-181.366	1	1	1
10.1997	-182.61	1	1	1
10.2413	-183.863	1	1	1
10.283	-185.097	1	1	1
10.3247	-186.402	1	1	1
10.3663	-187.696	1	1	1
10.408	-188.93	1	1	1
10.4497	-190.133	1	1	1
10.4913	-191.529	1	1	1
10.533	-192.762	1	1	1
10.5747	-194.016	1	1	1
10.6163	-195.321	1	1	1
10.658	-195.556	1	1	1
10.6997	-197.829	1	1	1
10.7413	-199.123	1	1	1
10.783	-200.438	1	1	1
10.8247	-201.804	1	1	1
10.8663	-203.089	1	1	1
10.908	-204.444	1	1	1
10.9497	-205.607	1	1	1
10.9913	-206.932	1	1	1
11.033	-208.226	1	1	1
11.0747	-209.439	1	1	1
11.1163	-210.775	1	1	1
11.158	-212.151	1	1	1
11.1997	-213.456	1	1	1
11.2413	-214.791	1	1	1
11.283	-215.933	1	1	1
11.3247	-216.86	1	1	1
11.3663	-218.41	1	1	1
11.408	-219.735	1	1	1
11.4497	-220.642	1	1	1
11.4913	-221.549	1	1	1
11.533	-223.527	1	1	1
11.5747	-225.27	1	1	1
11.6163	-226.972	1	1	1
11.658	-228.624	1	1	1
11.6997	-230.285	1	1	1
11.7413	-232.161	1	1	1
11.783	-233.843	1	1	1
11.8247	-235.698	1	1	1
11.8663	-237.554	1	1	1
11.908	-239.368	1	1	1
11.9497	-241.142	1	1	1
11.9913	-242.956	1	1	1
12.033	-245.148	1	1	1
12.0747	-247.238	1	1	1
12.1163	-249.46	1	1	1
12.158	-251.753	1	1	1
12.1997	-254.037	1	1	1
12.2413	-256.412	1	1	1
12.283	-258.247	1	1	1
12.3247	-259.297	1	1	1
12.3663	-263.017	1	1	1
12.408	-266.096	1	1	1
12.4497	-269.093	1	1	1
12.4913	-271.978	1	1	1
12.533	-274.883	1	1	1
12.5747	-278.002	1	1	1
12.6163	-281.182	1	1	1
12.658	-284.669	1	1	1
12.6997	-288.145	1	1	1
12.7413	-289.633	1	1	1
12.783	-294.893	1	1	1
12.8247	-298.736	1	1	1
12.8663	-302.742	1	1	1
12.908	-306.718	1	1	1
12.9497	-310.724	1	1	1
12.9913	-314.822	1	1	1
13.033	-318.481	1	1	1
13.0747	-323.048	1	1	1
13.1163	-327.299	1	1	1
13.158	-331.896	1	1	1
13.1997	-336.544	1	1	1
13.2413	-341.091	1	1	1
13.283	-345.902	1	1	1
13.3247	-351.101	1	1	1
13.3663	-356.473	1	1	1
13.408	-361.509	1	1	1
13.4497	-367.207	1	1	1
13.4913	-373.71	1	1	1
13.533	-380.265	1	1	1
13.5747	-387.023	1	1	1
13.6163	-393.67	1	1	1
13.658	-400.826	1	1	1
13.6997	-408.206	1	1	1
13.7413	-415.861	1	1	1
13.783	-420.153	1	1	1
13.8247	-430.754	1	1	1
13.8663	-439.46	1	1	1
13.908	-447.513	1	1	1
13.9497	-455.545	1	1	1
13.9913	-465.413	1	1	1
14.033	-474.251	1	1	1
14.0747	-483.802	1	1	1
14.1163	-493.496	1	1	1
14.158	-503.578	1	1	1
14.1997	-513.405	1	1	1
14.2413	-524.913	1	1	1
14.283	-534.801	1	1	1
14.3247	-442.905	1	1	1
14.3663	-553.394	1	1	1
14.408	-568.899	1	1	1
14.4497	-584.2	1	1	1
14.4913	-597.859	1	1	1
14.533	-611.825	1	1	1
14.5747	-624.322	1	1	1
14.6163	-640.183	1	1	1
14.658	-656.137	1	1	1
14.6997	-671.978	1	1	1
14.7413	-688.532	1	1	1
14.783	-699.939	1	1	1
14.8247	-719.256	1	1	1
14.8663	-737.339	1	1	1
14.908	-755.464	1	1	1
14.9497	-774.903	1	1	1
14.9913	-797.421	1	1	1
15.033	-819.827	1	1	1
15.0747	-842.487	1	1	1
15.1163	-866.279	1	1	1
15.158	-887.89	1	1	1
15.1997	-914.73	1	1	1
15.2413	-941.162	1	1	1
15.283	-966.728	1	1	1
15.3247	-995.025	1	1	1
15.3663	-1024.28	1	1	1
15.408	-1057.06	1	1	1
15.4497	-1089.25	1	1	1
15.4913	-1124.28	1	1	1
15.533	-1161.09	1	1	1
15.5747	-1183.12	1	1	1
15.6163	-1227.66	1	1	1
15.658	-1267.77	1	1	1
15.6997	-1310.93	1	1	1
15.7483	-1359.91	1	1	1
17.9149	-8970.44	1	1	1
0.453459	0.921149	2	0	100000
0.782434	0.935105	2	0	100000
1.64072	0.898975	2	0	100000
1.98566	0.875533	2	0	100000
2.21491	0.860656	2	0	100000
2.74573	0.824918	2	0	100000
2.97734	0.808566	2	0	100000
3.63974	0.757336	2	0	100000
3.97759	0.73209	2	0	100000
4.66375	0.684057	2	0	100000
5.16509	0.645697	2	0	100000
5.63911	0.609631	2	0	100000
6.08337	0.579426	2	0	100000
6.73899	0.537254	2	0	100000
7.86008	0.472787	2	0	100000
8.62524	0.428934	2	0	100000
9.60219	0.377172	2	0	100000
9.93456	0.360082	2	0	100000
10.5883	0.326721	2	0	100000
10.9446	0.308115	2	0	100000
11.5993	0.276148	2	0	100000
11.9733	0.257951	2	0	100000
12.5927	0.231516	2	0	100000
13.0189	0.215287	2	0	100000
13.6576	0.194836	2	0	100000
14.0527	0.184262	2	0	100000
14.6149	0.17123	2	0	100000
16.7385	0.134631	2	0	100000
17.86	0.11877	2	0	100000
18.7499	0.107746	2	0	100000
19.0073	0.104836	2	0	100000
19.6541	0.097459	2	0	100000
20.6515	0.087582	2	0	100000
22.7637	0.0730738	2	0	100000

## Sheet: tens_interpolation
		Tens unten [hPa]	Tens oben [hPa]	Datum / Zeit
m_bot	b_bot	0.24	2.69	41210.7	2012-10-28 16:19:39			2012-10-28 16:19:39	-0.244648	-2.7421
-2.88	118687	0.22	2.68	41210.7	2012-10-28 16:29:39			2012-10-28 16:29:39	-0.224261	-2.73191
m_top	b_top	-118.883	-56.8715	2012-12-09 01:01:10	2012-12-09 01:01:10
-1.44	59346.1	y = m*x+b
		AE unten [t]	AE oben [t]
		41227.2
m_bot	b_bot	613.31	247.01	2012-12-08 18:02:37	2012-12-08 18:02:37
-21.9323	905358	596.99	230.69	2012-12-09 11:54:08	2012-12-09 11:54:08
m_top	b_top	606.935	240.635	2012-12-09 01:01:10	2012-12-09 01:01:10
-21.9323	904991
