# Supplementary material for: A pore-size classification for peat bogs derived from unsaturated hydraulic properties
Source: Copernicus journal article supplement (doi:10.5194/hess-21-6185-2017), 2017-12-07
Supplement: Supplementary file 24 [file A332_8_HYDRUS.xlsx]

## Sheet: Gewicht
Datum / Zeit	Brutto-Gewicht [g]	Netto-Gewicht [g]	Gewichtsänderung [g]	Zeit [d]	Theta [-]	Verdunstungsrate [cm/d]		Volumen	243
2012-12-08 18:07:12	612.78	246.88	0					Höhe	5
2012-12-09 11:55:43	598.07	232.17	-14.71	0.742024	0.905021	0.407904		A	48.6
2012-12-09 19:49:43	592.01	226.11	-20.77	1.07119	0.880082	0.378809		Theta0	0.965556
2012-12-10 09:26:42	582.03	216.13	-30.75	1.63853	0.839012	0.36195		Trockengewicht	12.25
2012-12-10 17:43:48	576.96	211.06	-35.82	1.98375	0.818148	0.302189		Ks (as in Ksat)
2012-12-10 23:13:48	573.71	207.81	-39.07	2.21292	0.804774	0.291808		delta System [g]	365.9
2012-12-11 11:57:47	566.14	200.24	-46.64	2.74345	0.773621	0.293593
2012-12-11 17:36:54	562.64	196.74	-50.14	2.97895	0.759218	0.305806
2012-12-12 09:25:41	552.61	186.71	-60.17	3.63783	0.717942	0.313227
2012-12-12 17:28:15	547.59	181.69	-65.19	3.97294	0.697284	0.308229
2012-12-13 09:56:59	537.58	171.68	-75.2	4.65957	0.656091	0.299971
2012-12-13 22:01:54	529.7	163.8	-83.08	5.16298	0.623663	0.322082
2012-12-14 09:24:26	522.51	156.61	-90.27	5.63697	0.594074	0.312121
2012-12-14 20:04:55	516.09	150.19	-96.69	6.08174	0.567654	0.297003
2012-12-15 11:45:05	507.07	141.17	-105.71	6.73464	0.530535	0.284268
2012-12-16 14:38:43	493.34	127.44	-119.44	7.85522	0.474033	0.252111
2012-12-17 09:05:30	484.03	118.13	-128.75	8.62381	0.43572	0.249239
2012-12-18 08:27:30	472.19	106.29	-140.59	9.59743	0.386996	0.250223
2012-12-18 16:30:44	468.62	102.72	-144.16	9.933	0.372305	0.2189
2012-12-19 08:11:57	461.41	95.51	-151.37	10.5866	0.342634	0.226969
2012-12-19 16:44:46	457.52	91.62	-155.26	10.9428	0.326626	0.224759
2012-12-20 08:27:48	450.35	84.45	-162.43	11.5976	0.297119	0.225277
2012-12-20 17:26:21	445.56	79.66	-167.22	11.9716	0.277407	0.263539
2012-12-21 08:18:18	438	72.1	-174.78	12.591	0.246296	0.251134
2012-12-21 18:28:13	432.9	67	-179.88	13.0146	0.225309	0.247759
2012-12-22 09:47:58	425.21	59.31	-187.57	13.6533	0.193663	0.247729
2012-12-22 19:16:55	420.9	55	-191.88	14.0484	0.175926	0.224457
2012-12-23 08:50:13	415.3	49.4	-197.48	14.6132	0.152881	0.204016
2012-12-25 11:51:17	399.47	33.57	-213.31	16.7389	0.0877366	0.153227
2012-12-26 14:44:16	393.92	28.02	-218.86	17.8591	0.0648971	0.101951
2012-12-27 12:05:33	390.43	24.53	-222.35	18.7488	0.050535	0.0807059
2012-12-27 18:10:38	389.57	23.67	-223.21	19.0024	0.0469959	0.069794
2012-12-28 09:41:54	387.57	21.67	-225.21	19.6491	0.0387654	0.0636338
2012-12-29 09:42:51	385.06	19.16	-227.72	20.6498	0.0284362	0.0516116
2012-12-29 20:18:40	384.238	18.3385	-231.65	21.0913	0.0250556	0.0382835

## Sheet: Tensionen
Datum / Zeit	Tension unten [hPa]	Tension oben [hPa]	Zeit [d]	MP bot(2) [cm]	MP top(1) [cm]		WÄGUNG START
2012-12-08 17:51:08	3.29	5.85	-0.0111627	-3.35372	-5.9633		41251.8	-6.50357
2012-12-08 17:52:08	3.33	5.88	-0.0104682	-3.3945	-5.99388		2012-12-08 18:07:12
2012-12-08 17:53:08	3.35	5.92	-0.00977376	-3.41488	-6.03466
2012-12-08 17:54:08	3.39	5.95	-0.00907932	-3.45566	-6.06524
2012-12-08 17:55:08	3.44	6	-0.00838487	-3.50663	-6.11621
2012-12-08 17:56:08	3.34	5.61	-0.00769043	-3.40469	-5.71865
2012-12-08 17:57:08	3.5	6.05	-0.00699599	-3.56779	-6.16718
2012-12-08 17:58:08	3.55	6.1	-0.00630154	-3.61876	-6.21814
2012-12-08 17:59:08	3.56	6.12	-0.0056071	-3.62895	-6.23853
2012-12-08 18:00:08	3.61	6.17	-0.00491265	-3.67992	-6.2895
2012-12-08 18:01:08	3.67	6.21	-0.00421821	-3.74108	-6.33028
2012-12-08 18:02:08	3.69	6.23	-0.00352376	-3.76147	-6.35066
2012-12-08 18:03:08	3.72	6.27	-0.00282932	-3.79205	-6.39144
2012-12-08 18:04:08	3.74	6.29	-0.00213487	-3.81244	-6.41182
2012-12-08 18:05:08	3.8	6.36	-0.00144043	-3.8736	-6.48318
2012-12-08 18:06:08	3.82	6.38	-0.000745985	-3.89399	-6.50357
2012-12-08 18:07:08	3.86	6.01	-5.15408e-05	-3.93476	-6.1264
2012-12-08 18:08:08	3.71	6.26	0.000642904	-3.78186	-6.38124
2012-12-08 18:09:08	3.73	6.27	0.00133735	-3.80224	-6.39144
2012-12-08 18:10:08	3.72	6.29	0.00203179	-3.79205	-6.41182
2012-12-08 18:11:08	3.73	6.31	0.00272624	-3.80224	-6.43221	2012-12-08 18:11:08
2012-12-08 18:12:08	3.76	6.34	0.00342068	-3.83282	-6.46279
2012-12-08 18:13:08	3.82	6.37	0.00411513	-3.89399	-6.49337
2012-12-08 18:14:08	3.82	6.41	0.00480957	-3.89399	-6.53415
2012-12-08 18:15:08	3.85	6.45	0.00550401	-3.92457	-6.57492
2012-12-08 18:16:08	3.89	6.48	0.00619846	-3.96534	-6.6055
2012-12-08 18:17:08	3.92	6.5	0.0068929	-3.99592	-6.62589
2012-12-08 18:18:08	3.94	6.53	0.00758735	-4.01631	-6.65647
2012-12-08 18:19:08	3.98	6.55	0.00828179	-4.05708	-6.67686
2012-12-08 18:20:08	4.02	6.59	0.00897624	-4.09786	-6.71764
2012-12-08 18:21:08	4.06	6.62	0.00967068	-4.13863	-6.74822
2012-12-08 18:22:08	4.08	6.66	0.0103651	-4.15902	-6.78899
2012-12-08 18:23:08	4.11	6.69	0.0110596	-4.1896	-6.81957
2012-12-08 18:24:08	4.15	6.71	0.011754	-4.23038	-6.83996
2012-12-08 18:25:08	4.2	6.76	0.0124485	-4.28135	-6.89093
2012-12-08 18:26:08	4.24	6.79	0.0131429	-4.32212	-6.92151
2012-12-08 18:27:08	4.26	6.83	0.0138373	-4.34251	-6.96228
2012-12-08 18:28:08	4.3	6.85	0.0145318	-4.38328	-6.98267
2012-12-08 18:29:08	4.33	6.88	0.0152262	-4.41386	-7.01325
2012-12-08 18:30:08	4.36	6.91	0.0159207	-4.44444	-7.04383
2012-12-08 18:31:08	4.4	6.95	0.0166151	-4.48522	-7.08461
2012-12-08 18:32:08	4.43	6.98	0.0173096	-4.5158	-7.11519
2012-12-08 18:33:08	4.46	7.02	0.018004	-4.54638	-7.15596
2012-12-08 18:34:08	4.51	7.06	0.0186985	-4.59735	-7.19674
2012-12-08 18:35:08	4.53	7.09	0.0193929	-4.61774	-7.22732
2012-12-08 18:36:08	4.57	7.12	0.0200873	-4.65851	-7.2579
2012-12-08 18:37:08	4.6	7.15	0.0207818	-4.68909	-7.28848
2012-12-08 18:38:08	4.64	7.19	0.0214762	-4.72987	-7.32926
2012-12-08 18:39:08	4.68	7.22	0.0221707	-4.77064	-7.35984
2012-12-08 18:40:08	4.7	7.25	0.0228651	-4.79103	-7.39042
2012-12-08 18:41:08	4.73	7.28	0.0235596	-4.82161	-7.421
2012-12-08 18:42:08	4.78	7.31	0.024254	-4.87258	-7.45158
2012-12-08 18:43:08	4.79	7.34	0.0249485	-4.88277	-7.48216
2012-12-08 18:44:08	4.82	7.37	0.0256429	-4.91335	-7.51274
2012-12-08 18:45:08	4.86	7.4	0.0263373	-4.95413	-7.54332
2012-12-08 18:46:08	4.88	7.43	0.0270318	-4.97452	-7.5739
2012-12-08 18:47:08	4.9	7.45	0.0277262	-4.9949	-7.59429
2012-12-08 18:48:08	4.93	7.48	0.0284207	-5.02548	-7.62487
2012-12-08 18:49:08	4.96	7.52	0.0291151	-5.05607	-7.66565
2012-12-08 18:50:08	4.97	7.51	0.0298096	-5.06626	-7.65545
2012-12-08 18:51:08	4.96	7.51	0.030504	-5.05607	-7.65545
2012-12-08 19:01:08	5.11	7.64	0.0374485	-5.20897	-7.78797
2012-12-08 19:11:08	4.18	6.7	0.0443929	-4.26096	-6.82977	2012-12-08 19:11:08
2012-12-08 19:21:08	3.58	6.12	0.0513373	-3.64934	-6.23853
2012-12-08 19:31:08	3.47	6.01	0.0582818	-3.53721	-6.1264
2012-12-08 19:41:08	3.45	5.99	0.0652262	-3.51682	-6.10601
2012-12-08 19:51:08	3.47	6.02	0.0721707	-3.53721	-6.1366
2012-12-08 20:01:08	3.54	6.09	0.0791151	-3.60856	-6.20795
2012-12-08 20:11:08	3.63	6.17	0.0860596	-3.70031	-6.2895	2012-12-08 20:11:08
2012-12-08 20:21:08	3.73	6.27	0.093004	-3.80224	-6.39144
2012-12-08 20:31:08	3.82	6.37	0.0999485	-3.89399	-6.49337
2012-12-08 20:41:08	3.9	6.44	0.106893	-3.97554	-6.56473
2012-12-08 20:51:08	4	6.54	0.113837	-4.07747	-6.66667
2012-12-08 21:01:08	4.11	6.66	0.120782	-4.1896	-6.78899
2012-12-08 21:11:08	4.45	6.98	0.127726	-4.53619	-7.11519	2012-12-08 21:11:08
2012-12-08 21:21:08	4.81	7.36	0.134671	-4.90316	-7.50255
2012-12-08 21:31:08	5.19	7.71	0.141615	-5.29052	-7.85933
2012-12-08 21:41:08	5.46	8	0.14856	-5.56575	-8.15494
2012-12-08 21:51:08	5.72	8.26	0.155504	-5.83078	-8.41998
2012-12-08 22:01:08	6	8.52	0.162448	-6.11621	-8.68502
2012-12-08 22:11:08	6.24	8.76	0.169393	-6.36086	-8.92966	2012-12-08 22:11:08
2012-12-08 22:21:08	6.47	9	0.176337	-6.59531	-9.17431
2012-12-08 22:31:08	6.68	9.22	0.183282	-6.80938	-9.39857
2012-12-08 22:41:08	6.92	9.45	0.190226	-7.05403	-9.63303
2012-12-08 22:51:08	7.12	9.65	0.197171	-7.2579	-9.8369
2012-12-08 23:01:08	7.34	9.87	0.204115	-7.48216	-10.0612
2012-12-08 23:11:08	7.53	10.07	0.21106	-7.67584	-10.265	2012-12-08 23:11:08
2012-12-08 23:21:08	7.75	10.28	0.218004	-7.9001	-10.4791
2012-12-08 23:31:08	7.95	10.47	0.224948	-8.10398	-10.6728
2012-12-08 23:41:08	8.11	10.65	0.231893	-8.26707	-10.8563
2012-12-08 23:51:08	8.31	10.85	0.238837	-8.47095	-11.0601
2012-12-09 00:01:08	8.51	11.04	0.245782	-8.67482	-11.2538
2012-12-09 00:11:08	8.69	11.23	0.252726	-8.85831	-11.4475	2012-12-09 00:11:08
2012-12-09 00:21:08	8.89	11.41	0.259671	-9.06218	-11.631
2012-12-09 00:31:08	9.07	11.6	0.266615	-9.24567	-11.8247
2012-12-09 00:41:08	9.25	11.78	0.27356	-9.42915	-12.0082
2012-12-09 00:51:08	9.44	11.97	0.280504	-9.62283	-12.2018
2012-12-09 01:01:08	9.63	12.16	0.287448	-9.81651	-12.3955
2012-12-09 01:11:08	9.8	12.33	0.294393	-9.98981	-12.5688	2012-12-09 01:11:08
2012-12-09 01:21:08	9.94	12.47	0.301337	-10.1325	-12.7115
2012-12-09 01:31:08	10.11	12.64	0.308282	-10.3058	-12.8848
2012-12-09 01:41:08	10.27	12.79	0.315226	-10.4689	-13.0377
2012-12-09 01:51:08	10.41	12.94	0.322171	-10.6116	-13.1906
2012-12-09 02:01:08	10.59	13.11	0.329115	-10.7951	-13.3639
2012-12-09 02:11:08	10.73	13.26	0.33606	-10.9378	-13.5168	2012-12-09 02:11:08
2012-12-09 02:21:08	10.89	13.41	0.343004	-11.1009	-13.6697
2012-12-09 02:31:08	11.02	13.55	0.349948	-11.2334	-13.8124
2012-12-09 02:41:08	11.15	13.68	0.356893	-11.366	-13.945
2012-12-09 02:51:08	11.3	13.83	0.363837	-11.5189	-14.0979
2012-12-09 03:01:08	11.45	13.98	0.370782	-11.6718	-14.2508
2012-12-09 03:11:08	11.62	14.13	0.377726	-11.8451	-14.4037	2012-12-09 03:11:08
2012-12-09 03:21:08	11.75	14.27	0.384671	-11.9776	-14.5464
2012-12-09 03:31:08	11.89	14.41	0.391615	-12.1203	-14.6891
2012-12-09 03:41:08	12.02	14.53	0.39856	-12.2528	-14.8114
2012-12-09 03:51:08	12.08	14.59	0.405504	-12.314	-14.8726
2012-12-09 04:01:08	12.24	14.75	0.412448	-12.4771	-15.0357
2012-12-09 04:11:08	12.36	14.88	0.419393	-12.5994	-15.1682	2012-12-09 04:11:08
2012-12-09 04:21:08	12.52	15.05	0.426337	-12.7625	-15.3415
2012-12-09 04:31:08	12.63	15.15	0.433282	-12.8746	-15.4434
2012-12-09 04:41:08	12.21	14.97	0.440226	-12.4465	-15.2599
2012-12-09 04:51:08	11.44	13.96	0.447171	-11.6616	-14.2304
2012-12-09 05:01:08	11.92	14.45	0.454115	-12.1509	-14.7299
2012-12-09 05:11:08	12.33	14.85	0.46106	-12.5688	-15.1376	2012-12-09 05:11:08
2012-12-09 05:21:08	12.65	15.16	0.468004	-12.895	-15.4536
2012-12-09 05:31:08	12.81	15.33	0.474948	-13.0581	-15.6269
2012-12-09 05:41:08	10.15	12.68	0.481893	-10.3466	-12.9256
2012-12-09 05:51:08	9.64	12.16	0.488837	-9.82671	-12.3955
2012-12-09 06:01:08	9.71	12.24	0.495782	-9.89806	-12.4771
2012-12-09 06:11:08	9.91	12.43	0.502726	-10.1019	-12.6707	2012-12-09 06:11:08
2012-12-09 06:21:08	10.08	12.58	0.509671	-10.2752	-12.8236
2012-12-09 06:31:08	10.29	12.8	0.516615	-10.4893	-13.0479
2012-12-09 06:41:08	10.39	12.93	0.52356	-10.5912	-13.1804
2012-12-09 06:51:08	10.55	13.08	0.530504	-10.7543	-13.3333
2012-12-09 07:01:08	10.72	13.26	0.537448	-10.9276	-13.5168
2012-12-09 07:11:08	10.91	13.42	0.544393	-11.1213	-13.6799	2012-12-09 07:11:08
2012-12-09 07:21:08	11.06	13.58	0.551337	-11.2742	-13.843
2012-12-09 07:31:08	11.21	13.74	0.558282	-11.4271	-14.0061
2012-12-09 07:41:08	11.37	13.9	0.565226	-11.5902	-14.1692
2012-12-09 07:51:08	11.5	14.03	0.572171	-11.7227	-14.3017
2012-12-09 08:01:08	11.63	14.16	0.579115	-11.8552	-14.4343
2012-12-09 08:11:08	11.84	14.36	0.58606	-12.0693	-14.6381	2012-12-09 08:11:08
2012-12-09 08:21:08	11.9	14.43	0.593004	-12.1305	-14.7095
2012-12-09 08:31:08	11.99	14.52	0.599948	-12.2222	-14.8012
2012-12-09 08:41:08	11.44	13.96	0.606893	-11.6616	-14.2304
2012-12-09 08:51:08	11.61	14.15	0.613837	-11.8349	-14.4241
2012-12-09 09:01:08	11.81	14.35	0.620782	-12.0387	-14.6279
2012-12-09 09:11:08	11.99	14.53	0.627726	-12.2222	-14.8114	2012-12-09 09:11:08
2012-12-09 09:21:08	12.12	14.65	0.634671	-12.3547	-14.9337
2012-12-09 09:31:08	12.22	14.75	0.641615	-12.4567	-15.0357
2012-12-09 09:41:08	12.35	14.88	0.64856	-12.5892	-15.1682
2012-12-09 09:51:08	12.49	15.03	0.655504	-12.7319	-15.3211
2012-12-09 10:01:08	12.61	15.15	0.662448	-12.8542	-15.4434
2012-12-09 10:11:08	12.58	15.12	0.669393	-12.8236	-15.4128	2012-12-09 10:11:08
2012-12-09 10:21:08	12.79	15.31	0.676337	-13.0377	-15.6065
2012-12-09 10:31:08	12.87	15.41	0.683282	-13.1193	-15.7085
2012-12-09 10:41:08	12.97	15.48	0.690226	-13.2212	-15.7798
2012-12-09 10:51:08	12.76	15.27	0.697171	-13.0071	-15.5657
2012-12-09 11:01:08	12.93	15.46	0.704115	-13.1804	-15.7594
2012-12-09 11:11:08	13.04	15.55	0.71106	-13.2926	-15.8512	2012-12-09 11:11:08
2012-12-09 11:21:08	13.04	15.58	0.718004	-13.2926	-15.8818
2012-12-09 11:31:08	13.16	15.68	0.724948	-13.4149	-15.9837
2012-12-09 11:41:08	13.15	15.68	0.731893	-13.4047	-15.9837
2012-12-09 11:51:08	13.27	15.78	0.738837	-13.527	-16.0856
2012-12-09 12:01:08	12.46	15.01	0.745782	-12.7013	-15.3007
2012-12-09 12:11:08	12.37	14.88	0.752726	-12.6096	-15.1682	2012-12-09 12:11:08
2012-12-09 12:21:08	12.67	15.17	0.759671	-12.9154	-15.4638
2012-12-09 12:31:08	12.9	15.42	0.766615	-13.1498	-15.7187
2012-12-09 12:41:08	13.01	15.53	0.77356	-13.262	-15.8308
2012-12-09 12:51:08	13.2	15.7	0.780504	-13.4557	-16.0041
2012-12-09 13:01:08	13.32	15.84	0.787448	-13.578	-16.1468
2012-12-09 13:11:08	13.42	15.93	0.794393	-13.6799	-16.2385	2012-12-09 13:11:08
2012-12-09 13:21:08	13.19	15.66	0.801337	-13.4455	-15.9633
2012-12-09 13:31:08	13.47	15.96	0.808282	-13.7309	-16.2691
2012-12-09 13:41:08	13.6	16.1	0.815226	-13.8634	-16.4118
2012-12-09 13:51:08	13.62	16.13	0.822171	-13.8838	-16.4424
2012-12-09 14:01:08	13.69	16.21	0.829115	-13.9551	-16.524
2012-12-09 14:11:08	13.79	16.27	0.83606	-14.0571	-16.5851	2012-12-09 14:11:08
2012-12-09 14:21:08	13.73	16.25	0.843004	-13.9959	-16.5647
2012-12-09 14:31:08	13.84	16.35	0.849948	-14.1081	-16.6667
2012-12-09 14:41:08	13.97	16.45	0.856893	-14.2406	-16.7686
2012-12-09 14:51:08	14.07	16.56	0.863837	-14.3425	-16.8807
2012-12-09 15:01:08	13.96	16.47	0.870782	-14.2304	-16.789
2012-12-09 15:11:08	14.04	16.55	0.877726	-14.3119	-16.8705	2012-12-09 15:11:08
2012-12-09 15:21:08	14.07	16.56	0.884671	-14.3425	-16.8807
2012-12-09 15:31:08	13.78	16.27	0.891615	-14.0469	-16.5851
2012-12-09 15:41:08	14.04	16.52	0.89856	-14.3119	-16.84
2012-12-09 15:51:08	14.15	16.63	0.905504	-14.4241	-16.9521
2012-12-09 16:01:08	14.24	16.75	0.912448	-14.5158	-17.0744
2012-12-09 16:11:08	14.37	16.87	0.919393	-14.6483	-17.1967	2012-12-09 16:11:08
2012-12-09 16:21:08	13.18	15.7	0.926337	-13.4353	-16.0041
2012-12-09 16:31:08	13.53	16.04	0.933282	-13.792	-16.3507
2012-12-09 16:41:08	13.76	16.28	0.940226	-14.0265	-16.5953
2012-12-09 16:51:08	13.99	16.51	0.947171	-14.261	-16.8298
2012-12-09 17:01:08	14.07	16.57	0.954115	-14.3425	-16.8909
2012-12-09 17:11:08	14.28	16.76	0.96106	-14.5566	-17.0846	2012-12-09 17:11:08
2012-12-09 17:21:08	14.35	16.86	0.968004	-14.6279	-17.1865
2012-12-09 17:31:08	14.44	16.98	0.974948	-14.7197	-17.3089
2012-12-09 17:41:08	14.54	17.04	0.981893	-14.8216	-17.37
2012-12-09 17:51:08	14.63	17.13	0.988837	-14.9134	-17.4618
2012-12-09 18:01:08	14.75	17.24	0.995782	-15.0357	-17.5739
2012-12-09 18:11:08	14.76	17.27	1.00273	-15.0459	-17.6045	2012-12-09 18:11:08
2012-12-09 18:21:08	14.82	17.32	1.00967	-15.107	-17.6555
2012-12-09 18:31:08	14.89	17.39	1.01662	-15.1784	-17.7268
2012-12-09 18:41:08	14.95	17.45	1.02356	-15.2396	-17.788
2012-12-09 18:51:08	15.06	17.55	1.0305	-15.3517	-17.8899
2012-12-09 19:01:08	15.09	17.58	1.03745	-15.3823	-17.9205
2012-12-09 19:11:08	15.18	17.67	1.04439	-15.474	-18.0122	2012-12-09 19:11:08
2012-12-09 19:21:08	15.2	17.71	1.05134	-15.4944	-18.053
2012-12-09 19:31:08	15.28	17.78	1.05828	-15.5759	-18.1244
2012-12-09 19:41:08	15.38	17.88	1.06523	-15.6779	-18.2263
2012-12-09 19:51:08	14.85	17.35	1.07217	-15.1376	-17.686
2012-12-09 20:01:08	15.17	17.65	1.07912	-15.4638	-17.9918
2012-12-09 20:11:08	15.36	17.84	1.08606	-15.6575	-18.1855	2012-12-09 20:11:08
2012-12-09 20:21:08	15.46	17.95	1.093	-15.7594	-18.2977
2012-12-09 20:31:08	15.5	17.99	1.09995	-15.8002	-18.3384
2012-12-09 20:41:08	15.29	17.79	1.10689	-15.5861	-18.1346
2012-12-09 20:51:08	15.44	17.95	1.11384	-15.739	-18.2977
2012-12-09 21:01:08	15.49	18.01	1.12078	-15.79	-18.3588
2012-12-09 21:11:08	15.63	18.12	1.12773	-15.9327	-18.4709	2012-12-09 21:11:08
2012-12-09 21:21:08	15.7	18.2	1.13467	-16.0041	-18.5525
2012-12-09 21:31:08	15.77	18.26	1.14162	-16.0754	-18.6137
2012-12-09 21:41:08	15.8	18.31	1.14856	-16.106	-18.6646
2012-12-09 21:51:08	15.91	18.4	1.1555	-16.2181	-18.7564
2012-12-09 22:01:08	15.98	18.48	1.16245	-16.2895	-18.8379
2012-12-09 22:11:08	16.04	18.52	1.16939	-16.3507	-18.8787	2012-12-09 22:11:08
2012-12-09 22:21:08	15.98	18.47	1.17634	-16.2895	-18.8277
2012-12-09 22:31:08	16.08	18.58	1.18328	-16.3914	-18.9399
2012-12-09 22:41:08	16.15	18.65	1.19023	-16.4628	-19.0112
2012-12-09 22:51:08	16.23	18.71	1.19717	-16.5443	-19.0724
2012-12-09 23:01:08	16.27	18.78	1.20412	-16.5851	-19.1437
2012-12-09 23:11:08	15.2	17.68	1.21106	-15.4944	-18.0224	2012-12-09 23:11:08
2012-12-09 23:21:08	15.53	18.03	1.218	-15.8308	-18.3792
2012-12-09 23:31:08	15.85	18.35	1.22495	-16.157	-18.7054
2012-12-09 23:41:08	16.06	18.55	1.23189	-16.371	-18.9093
2012-12-09 23:51:08	16.18	18.68	1.23884	-16.4934	-19.0418
2012-12-10 00:01:08	16.25	18.76	1.24578	-16.5647	-19.1233
2012-12-10 00:11:08	16.36	18.85	1.25273	-16.6769	-19.2151	2012-12-10 00:11:08
2012-12-10 00:21:08	16.42	18.92	1.25967	-16.738	-19.2864
2012-12-10 00:31:08	16.49	18.99	1.26662	-16.8094	-19.3578
2012-12-10 00:41:08	16.55	19.06	1.27356	-16.8705	-19.4292
2012-12-10 00:51:08	16.59	19.09	1.2805	-16.9113	-19.4597
2012-12-10 01:01:08	16.66	19.17	1.28745	-16.9827	-19.5413
2012-12-10 01:11:08	16.69	19.19	1.29439	-17.0133	-19.5617	2012-12-10 01:11:08
2012-12-10 01:21:08	16.79	19.28	1.30134	-17.1152	-19.6534
2012-12-10 01:31:08	16.86	19.35	1.30828	-17.1865	-19.7248
2012-12-10 01:41:08	16.9	19.4	1.31523	-17.2273	-19.7757
2012-12-10 01:51:08	16.95	19.45	1.32217	-17.2783	-19.8267
2012-12-10 02:01:08	17	19.5	1.32912	-17.3293	-19.8777
2012-12-10 02:11:08	17.09	19.57	1.33606	-17.421	-19.949	2012-12-10 02:11:08
2012-12-10 02:21:08	17.03	19.53	1.343	-17.3598	-19.9083
2012-12-10 02:31:08	17.08	19.57	1.34995	-17.4108	-19.949
2012-12-10 02:41:08	16.75	19.28	1.35689	-17.0744	-19.6534
2012-12-10 02:51:08	17.05	19.54	1.36384	-17.3802	-19.9185
2012-12-10 03:01:08	17.12	19.62	1.37078	-17.4516	-20
2012-12-10 03:11:08	17.13	19.62	1.37773	-17.4618	-20	2012-12-10 03:11:08
2012-12-10 03:21:08	17.13	19.66	1.38467	-17.4618	-20.0408
2012-12-10 03:31:08	17.19	19.69	1.39162	-17.5229	-20.0714
2012-12-10 03:41:08	17.27	19.76	1.39856	-17.6045	-20.1427
2012-12-10 03:51:08	17.34	19.84	1.4055	-17.6758	-20.2243
2012-12-10 04:01:08	17.4	19.9	1.41245	-17.737	-20.2854
2012-12-10 04:11:08	17.43	19.92	1.41939	-17.7676	-20.3058	2012-12-10 04:11:08
2012-12-10 04:21:08	17.46	19.95	1.42634	-17.7982	-20.3364
2012-12-10 04:31:08	17.37	19.86	1.43328	-17.7064	-20.2446
2012-12-10 04:41:08	17.13	19.58	1.44023	-17.4618	-19.9592
2012-12-10 04:51:08	17.39	19.89	1.44717	-17.7268	-20.2752
2012-12-10 05:01:08	17.47	19.96	1.45412	-17.8084	-20.3466
2012-12-10 05:11:08	17.44	19.95	1.46106	-17.7778	-20.3364	2012-12-10 05:11:08
2012-12-10 05:21:08	17.52	20.03	1.468	-17.8593	-20.4179
2012-12-10 05:31:08	17.59	20.09	1.47495	-17.9307	-20.4791
2012-12-10 05:41:08	17.62	20.12	1.48189	-17.9613	-20.5097
2012-12-10 05:51:08	17.66	20.16	1.48884	-18.002	-20.5505
2012-12-10 06:01:08	17.73	20.22	1.49578	-18.0734	-20.6116
2012-12-10 06:11:08	17.78	20.27	1.50273	-18.1244	-20.6626	2012-12-10 06:11:08
2012-12-10 06:21:08	17.84	20.34	1.50967	-18.1855	-20.7339
2012-12-10 06:31:08	17.84	20.34	1.51662	-18.1855	-20.7339
2012-12-10 06:41:08	17.86	20.36	1.52356	-18.2059	-20.7543
2012-12-10 06:51:08	17.91	20.42	1.5305	-18.2569	-20.8155
2012-12-10 07:01:08	17.95	20.45	1.53745	-18.2977	-20.8461
2012-12-10 07:11:08	18.01	20.51	1.54439	-18.3588	-20.9072	2012-12-10 07:11:08
2012-12-10 07:21:08	18.04	20.52	1.55134	-18.3894	-20.9174
2012-12-10 07:31:08	17.88	20.37	1.55828	-18.2263	-20.7645
2012-12-10 07:41:08	18.04	20.53	1.56523	-18.3894	-20.9276
2012-12-10 07:51:08	18.1	20.6	1.57217	-18.4506	-20.999
2012-12-10 08:01:08	17.98	20.48	1.57912	-18.3282	-20.8767
2012-12-10 08:11:08	18.15	20.64	1.58606	-18.5015	-21.0398	2012-12-10 08:11:08
2012-12-10 08:21:08	18.06	20.56	1.593	-18.4098	-20.9582
2012-12-10 08:31:08	18.16	20.66	1.59995	-18.5117	-21.0601
2012-12-10 08:41:08	18.22	20.7	1.60689	-18.5729	-21.1009
2012-12-10 08:51:08	18.21	20.7	1.61384	-18.5627	-21.1009
2012-12-10 09:01:08	18.13	20.61	1.62078	-18.4811	-21.0092
2012-12-10 09:11:08	18.23	20.72	1.62773	-18.5831	-21.1213	2012-12-10 09:11:08
2012-12-10 09:21:08	18.27	20.76	1.63467	-18.6239	-21.1621
2012-12-10 09:31:08	17.73	20.25	1.64162	-18.0734	-20.6422
2012-12-10 09:41:08	17.99	20.48	1.64856	-18.3384	-20.8767
2012-12-10 09:51:08	18.17	20.66	1.6555	-18.5219	-21.0601
2012-12-10 10:01:08	18.29	20.79	1.66245	-18.6442	-21.1927
2012-12-10 10:11:08	18.34	20.83	1.66939	-18.6952	-21.2334	2012-12-10 10:11:08
2012-12-10 10:21:08	18.36	20.84	1.67634	-18.7156	-21.2436
2012-12-10 10:31:08	18.43	20.93	1.68328	-18.787	-21.3354
2012-12-10 10:41:08	18.39	20.88	1.69023	-18.7462	-21.2844
2012-12-10 10:51:08	18.45	20.93	1.69717	-18.8073	-21.3354
2012-12-10 11:01:08	18.49	20.99	1.70412	-18.8481	-21.3965
2012-12-10 11:11:08	18.51	21	1.71106	-18.8685	-21.4067	2012-12-10 11:11:08
2012-12-10 11:21:08	18.55	21.05	1.718	-18.9093	-21.4577
2012-12-10 11:31:08	18.63	21.11	1.72495	-18.9908	-21.5189
2012-12-10 11:41:08	18.64	21.14	1.73189	-19.001	-21.5494
2012-12-10 11:51:08	18.65	21.14	1.73884	-19.0112	-21.5494
2012-12-10 12:01:08	18.72	21.2	1.74578	-19.0826	-21.6106
2012-12-10 12:11:08	18.64	21.1	1.75273	-19.001	-21.5087	2012-12-10 12:11:08
2012-12-10 12:21:08	18.71	21.21	1.75967	-19.0724	-21.6208
2012-12-10 12:31:08	18.74	21.23	1.76662	-19.103	-21.6412
2012-12-10 12:41:08	18.71	21.21	1.77356	-19.0724	-21.6208
2012-12-10 12:51:08	18.67	21.17	1.7805	-19.0316	-21.58
2012-12-10 13:01:08	18.81	21.29	1.78745	-19.1743	-21.7023
2012-12-10 13:08:40	18.81	21.3	1.79268	-19.1743	-21.7125	2012-12-10 13:08:40
2012-12-10 13:09:40	18.79	21.28	1.79338	-19.1539	-21.6922
2012-12-10 13:10:40	18.8	21.28	1.79407	-19.1641	-21.6922
2012-12-10 13:11:40	18.8	21.33	1.79477	-19.1641	-21.7431
2012-12-10 13:12:40	18.81	21.31	1.79546	-19.1743	-21.7227
2012-12-10 13:13:40	18.8	21.29	1.79616	-19.1641	-21.7023
2012-12-10 13:14:40	18.8	21.31	1.79685	-19.1641	-21.7227	2012-12-10 13:14:40
2012-12-10 13:15:40	18.82	21.32	1.79755	-19.1845	-21.7329
2012-12-10 13:16:40	18.81	21.31	1.79824	-19.1743	-21.7227
2012-12-10 13:17:40	18.83	21.31	1.79893	-19.1947	-21.7227
2012-12-10 13:18:40	18.83	21.3	1.79963	-19.1947	-21.7125
2012-12-10 13:19:40	18.84	21.34	1.80032	-19.2049	-21.7533
2012-12-10 13:20:40	18.88	21.36	1.80102	-19.2457	-21.7737	2012-12-10 13:20:40
2012-12-10 13:21:40	18.87	21.33	1.80171	-19.2355	-21.7431
2012-12-10 13:22:40	18.86	21.34	1.80241	-19.2253	-21.7533
2012-12-10 13:23:40	18.83	21.33	1.8031	-19.1947	-21.7431
2012-12-10 13:24:40	18.88	21.36	1.8038	-19.2457	-21.7737
2012-12-10 13:25:40	18.86	21.33	1.80449	-19.2253	-21.7431
2012-12-10 13:26:40	18.87	21.36	1.80518	-19.2355	-21.7737	2012-12-10 13:26:40
2012-12-10 13:27:40	18.88	21.37	1.80588	-19.2457	-21.7839
2012-12-10 13:28:40	18.88	21.37	1.80657	-19.2457	-21.7839
2012-12-10 13:29:40	18.9	21.38	1.80727	-19.2661	-21.7941
2012-12-10 13:30:40	18.89	21.37	1.80796	-19.2559	-21.7839
2012-12-10 13:31:40	18.89	21.37	1.80866	-19.2559	-21.7839
2012-12-10 13:32:40	18.9	21.4	1.80935	-19.2661	-21.8145	2012-12-10 13:32:40
2012-12-10 13:33:40	18.91	21.4	1.81005	-19.2762	-21.8145
2012-12-10 13:34:40	18.92	21.39	1.81074	-19.2864	-21.8043
2012-12-10 13:35:40	18.86	21.39	1.81143	-19.2253	-21.8043
2012-12-10 13:36:40	18.92	21.4	1.81213	-19.2864	-21.8145
2012-12-10 13:37:40	18.91	21.39	1.81282	-19.2762	-21.8043
2012-12-10 13:38:40	18.91	21.4	1.81352	-19.2762	-21.8145	2012-12-10 13:38:40
2012-12-10 13:39:40	18.9	21.4	1.81421	-19.2661	-21.8145
2012-12-10 13:40:40	18.9	21.41	1.81491	-19.2661	-21.8247
2012-12-10 13:41:40	18.9	21.39	1.8156	-19.2661	-21.8043
2012-12-10 13:42:40	18.91	21.39	1.8163	-19.2762	-21.8043
2012-12-10 13:43:40	18.91	21.4	1.81699	-19.2762	-21.8145
2012-12-10 13:44:40	18.92	21.41	1.81768	-19.2864	-21.8247	2012-12-10 13:44:40
2012-12-10 13:45:40	18.92	21.42	1.81838	-19.2864	-21.8349
2012-12-10 13:46:40	18.94	21.43	1.81907	-19.3068	-21.8451
2012-12-10 13:47:40	18.96	21.44	1.81977	-19.3272	-21.8552
2012-12-10 13:48:40	18.91	21.43	1.82046	-19.2762	-21.8451
2012-12-10 13:49:40	18.96	21.45	1.82116	-19.3272	-21.8654
2012-12-10 13:50:40	18.96	21.45	1.82185	-19.3272	-21.8654	2012-12-10 13:50:40
2012-12-10 13:51:40	18.95	21.43	1.82255	-19.317	-21.8451
2012-12-10 13:52:40	18.96	21.45	1.82324	-19.3272	-21.8654
2012-12-10 13:53:40	18.95	21.44	1.82393	-19.317	-21.8552
2012-12-10 13:54:40	18.98	21.47	1.82463	-19.3476	-21.8858
2012-12-10 13:55:40	18.99	21.48	1.82532	-19.3578	-21.896
2012-12-10 13:56:40	18.98	21.46	1.82602	-19.3476	-21.8756	2012-12-10 13:56:40
2012-12-10 13:57:40	18.98	21.45	1.82671	-19.3476	-21.8654
2012-12-10 13:58:40	19.02	21.51	1.82741	-19.3884	-21.9266
2012-12-10 13:59:40	19.05	21.52	1.8281	-19.419	-21.9368
2012-12-10 14:00:40	19.01	21.52	1.8288	-19.3782	-21.9368
2012-12-10 14:01:40	19.01	21.5	1.82949	-19.3782	-21.9164
2012-12-10 14:02:40	19.03	21.5	1.83018	-19.3986	-21.9164	2012-12-10 14:02:40
2012-12-10 14:03:40	19.03	21.52	1.83088	-19.3986	-21.9368
2012-12-10 14:04:40	19.03	21.52	1.83157	-19.3986	-21.9368
2012-12-10 14:05:40	19	21.51	1.83227	-19.368	-21.9266
2012-12-10 14:06:40	19.04	21.52	1.83296	-19.4088	-21.9368
2012-12-10 14:07:40	19.03	21.52	1.83366	-19.3986	-21.9368
2012-12-10 14:08:40	19.02	21.52	1.83435	-19.3884	-21.9368	2012-12-10 14:08:40
2012-12-10 14:18:40	19.03	21.52	1.8413	-19.3986	-21.9368
2012-12-10 14:28:40	19.1	21.59	1.84824	-19.4699	-22.0082
2012-12-10 14:38:40	19.16	21.65	1.85518	-19.5311	-22.0693
2012-12-10 14:48:40	19.17	21.65	1.86213	-19.5413	-22.0693
2012-12-10 14:58:40	19.21	21.71	1.86907	-19.5821	-22.1305
2012-12-10 15:08:40	19.27	21.75	1.87602	-19.6432	-22.1713	2012-12-10 15:08:40
2012-12-10 15:18:40	19.32	21.8	1.88296	-19.6942	-22.2222
2012-12-10 15:28:40	19.29	21.78	1.88991	-19.6636	-22.2018
2012-12-10 15:38:40	19.3	21.84	1.89685	-19.6738	-22.263
2012-12-10 15:48:40	19.38	21.88	1.9038	-19.7554	-22.3038
2012-12-10 15:58:40	19.43	21.89	1.91074	-19.8063	-22.314
2012-12-10 16:08:40	19.48	21.95	1.91768	-19.8573	-22.3751	2012-12-10 16:08:40
2012-12-10 16:18:40	19.51	22.01	1.92463	-19.8879	-22.4363
2012-12-10 16:28:40	19.52	22.02	1.93157	-19.8981	-22.4465
2012-12-10 16:38:40	19.56	22.06	1.93852	-19.9388	-22.4873
2012-12-10 16:48:40	19.54	22.03	1.94546	-19.9185	-22.4567
2012-12-10 16:58:40	19.6	22.07	1.95241	-19.9796	-22.4975
2012-12-10 17:08:40	19.64	22.13	1.95935	-20.0204	-22.5586	2012-12-10 17:08:40
2012-12-10 17:18:40	19.53	22.02	1.9663	-19.9083	-22.4465
2012-12-10 17:28:40	19.63	22.12	1.97324	-20.0102	-22.5484
2012-12-10 17:38:40	19.68	22.15	1.98018	-20.0612	-22.579
2012-12-10 17:48:40	19.37	21.87	1.98713	-19.7452	-22.2936
2012-12-10 17:58:40	19.59	22.1	1.99407	-19.9694	-22.528
2012-12-10 18:08:40	19.72	22.23	2.00102	-20.1019	-22.6606	2012-12-10 18:08:40
2012-12-10 18:18:40	19.76	22.26	2.00796	-20.1427	-22.6911
2012-12-10 18:28:40	19.78	22.28	2.01491	-20.1631	-22.7115
2012-12-10 18:38:40	19.81	22.31	2.02185	-20.1937	-22.7421
2012-12-10 18:48:40	19.83	22.34	2.0288	-20.2141	-22.7727
2012-12-10 18:58:40	19.88	22.39	2.03574	-20.265	-22.8236
2012-12-10 19:08:40	19.73	22.22	2.04268	-20.1121	-22.6504	2012-12-10 19:08:40
2012-12-10 19:18:40	19.85	22.36	2.04963	-20.2345	-22.7931
2012-12-10 19:28:40	19.92	22.42	2.05657	-20.3058	-22.8542
2012-12-10 19:38:40	19.95	22.45	2.06352	-20.3364	-22.8848
2012-12-10 19:48:40	20.02	22.5	2.07046	-20.4077	-22.9358
2012-12-10 19:58:40	20.03	22.53	2.07741	-20.4179	-22.9664
2012-12-10 20:08:40	20.08	22.58	2.08435	-20.4689	-23.0173	2012-12-10 20:08:40
2012-12-10 20:18:40	20.09	22.59	2.0913	-20.4791	-23.0275
2012-12-10 20:28:40	20.12	22.61	2.09824	-20.5097	-23.0479
2012-12-10 20:38:40	20.16	22.67	2.10518	-20.5505	-23.1091
2012-12-10 20:48:40	20.21	22.71	2.11213	-20.6014	-23.1498
2012-12-10 20:58:40	20.19	22.71	2.11907	-20.581	-23.1498
2012-12-10 21:08:40	20.23	22.74	2.12602	-20.6218	-23.1804	2012-12-10 21:08:40
2012-12-10 21:18:40	20.24	22.74	2.13296	-20.632	-23.1804
2012-12-10 21:28:40	20.3	22.8	2.13991	-20.6932	-23.2416
2012-12-10 21:38:40	20.36	22.86	2.14685	-20.7543	-23.3028
2012-12-10 21:48:40	20.38	22.89	2.1538	-20.7747	-23.3333
2012-12-10 21:58:40	20.43	22.93	2.16074	-20.8257	-23.3741
2012-12-10 22:08:40	20.47	22.97	2.16768	-20.8665	-23.4149	2012-12-10 22:08:40
2012-12-10 22:18:40	20.51	22.99	2.17463	-20.9072	-23.4353
2012-12-10 22:28:40	20.5	22.99	2.18157	-20.897	-23.4353
2012-12-10 22:38:40	20.54	23.04	2.18852	-20.9378	-23.4862
2012-12-10 22:48:40	20.56	23.05	2.19546	-20.9582	-23.4964
2012-12-10 22:58:40	20.61	23.11	2.20241	-21.0092	-23.5576
2012-12-10 23:08:40	20.64	23.13	2.20935	-21.0398	-23.578	2012-12-10 23:08:40
2012-12-10 23:18:40	20.33	22.83	2.2163	-20.7238	-23.2722
2012-12-10 23:28:40	20.49	22.98	2.22324	-20.8869	-23.4251
2012-12-10 23:38:40	20.64	23.14	2.23018	-21.0398	-23.5882
2012-12-10 23:48:40	20.68	23.17	2.23713	-21.0805	-23.6188
2012-12-10 23:58:40	20.67	23.17	2.24407	-21.0703	-23.6188
2012-12-11 00:08:40	20.7	23.2	2.25102	-21.1009	-23.6493	2012-12-11 00:08:40
2012-12-11 00:18:40	20.78	23.28	2.25796	-21.1825	-23.7309
2012-12-11 00:28:40	20.79	23.29	2.26491	-21.1927	-23.7411
2012-12-11 00:38:40	20.83	23.32	2.27185	-21.2334	-23.7717
2012-12-11 00:48:40	20.84	23.33	2.2788	-21.2436	-23.7819
2012-12-11 00:58:40	20.9	23.41	2.28574	-21.3048	-23.8634
2012-12-11 01:08:40	20.93	23.43	2.29268	-21.3354	-23.8838	2012-12-11 01:08:40
2012-12-11 01:18:40	20.97	23.46	2.29963	-21.3761	-23.9144
2012-12-11 01:28:40	21	23.48	2.30657	-21.4067	-23.9348
2012-12-11 01:38:40	21.02	23.52	2.31352	-21.4271	-23.9755
2012-12-11 01:48:40	21.06	23.56	2.32046	-21.4679	-24.0163
2012-12-11 01:58:40	21.07	23.56	2.32741	-21.4781	-24.0163
2012-12-11 02:08:40	21.1	23.61	2.33435	-21.5087	-24.0673	2012-12-11 02:08:40
2012-12-11 02:18:40	21.08	23.57	2.3413	-21.4883	-24.0265
2012-12-11 02:28:40	21.09	23.59	2.34824	-21.4985	-24.0469
2012-12-11 02:38:40	20.98	23.48	2.35518	-21.3863	-23.9348
2012-12-11 02:48:40	21.14	23.63	2.36213	-21.5494	-24.0877
2012-12-11 02:58:40	19.81	22.3	2.36907	-20.1937	-22.7319
2012-12-11 03:08:40	20.07	22.56	2.37602	-20.4587	-22.9969	2012-12-11 03:08:40
2012-12-11 03:18:40	20.11	22.6	2.38296	-20.4995	-23.0377
2012-12-11 03:28:40	20.28	22.76	2.38991	-20.6728	-23.2008
2012-12-11 03:38:40	20.41	22.9	2.39685	-20.8053	-23.3435
2012-12-11 03:48:40	20.6	23.09	2.4038	-20.999	-23.5372
2012-12-11 03:58:40	20.74	23.23	2.41074	-21.1417	-23.6799
2012-12-11 04:08:40	20.88	23.37	2.41768	-21.2844	-23.8226	2012-12-11 04:08:40
2012-12-11 04:18:40	21.01	23.49	2.42463	-21.4169	-23.945
2012-12-11 04:28:40	21.05	23.52	2.43157	-21.4577	-23.9755
2012-12-11 04:38:40	21.09	23.59	2.43852	-21.4985	-24.0469
2012-12-11 04:48:40	21.15	23.64	2.44546	-21.5596	-24.0979
2012-12-11 04:58:40	21.17	23.67	2.45241	-21.58	-24.1284
2012-12-11 05:08:40	21.21	23.71	2.45935	-21.6208	-24.1692	2012-12-11 05:08:40
2012-12-11 05:18:40	21.24	23.73	2.4663	-21.6514	-24.1896
2012-12-11 05:28:40	21.28	23.78	2.47324	-21.6922	-24.2406
2012-12-11 05:38:40	21.31	23.8	2.48018	-21.7227	-24.261
2012-12-11 05:48:40	21.34	23.83	2.48713	-21.7533	-24.2915
2012-12-11 05:58:40	21.05	23.53	2.49407	-21.4577	-23.9857
2012-12-11 06:08:40	21.18	23.66	2.50102	-21.5902	-24.1182	2012-12-11 06:08:40
2012-12-11 06:18:40	21.3	23.79	2.50796	-21.7125	-24.2508
2012-12-11 06:28:40	21.36	23.85	2.51491	-21.7737	-24.3119
2012-12-11 06:38:40	21.41	23.88	2.52185	-21.8247	-24.3425
2012-12-11 06:48:40	21.41	23.9	2.5288	-21.8247	-24.3629
2012-12-11 06:58:40	21.45	23.93	2.53574	-21.8654	-24.3935
2012-12-11 07:08:40	21.4	23.9	2.54268	-21.8145	-24.3629	2012-12-11 07:08:40
2012-12-11 07:18:40	21.48	23.96	2.54963	-21.896	-24.4241
2012-12-11 07:28:40	21.52	24	2.55657	-21.9368	-24.4648
2012-12-11 07:38:40	21.54	24.03	2.56352	-21.9572	-24.4954
2012-12-11 07:48:40	21.58	24.07	2.57046	-21.998	-24.5362
2012-12-11 07:58:40	21.59	24.07	2.57741	-22.0082	-24.5362
2012-12-11 08:08:40	21.62	24.1	2.58435	-22.0387	-24.5668	2012-12-11 08:08:40
2012-12-11 08:18:40	21.66	24.15	2.5913	-22.0795	-24.6177
2012-12-11 08:28:40	21.69	24.17	2.59824	-22.1101	-24.6381
2012-12-11 08:38:40	21.71	24.2	2.60518	-22.1305	-24.6687
2012-12-11 08:48:40	21.74	24.23	2.61213	-22.1611	-24.6993
2012-12-11 08:58:40	21.77	24.26	2.61907	-22.1916	-24.7299
2012-12-11 09:08:40	21.79	24.29	2.62602	-22.212	-24.7604	2012-12-11 09:08:40
2012-12-11 09:18:40	21.84	24.32	2.63296	-22.263	-24.791
2012-12-11 09:28:40	21.83	24.32	2.63991	-22.2528	-24.791
2012-12-11 09:38:40	21.84	24.34	2.64685	-22.263	-24.8114
2012-12-11 09:48:40	21.66	24.19	2.6538	-22.0795	-24.6585
2012-12-11 09:58:40	21.81	24.3	2.66074	-22.2324	-24.7706
2012-12-11 10:08:40	21.86	24.35	2.66768	-22.2834	-24.8216	2012-12-11 10:08:40
2012-12-11 10:18:40	21.8	24.34	2.67463	-22.2222	-24.8114
2012-12-11 10:28:40	21.89	24.38	2.68157	-22.314	-24.8522
2012-12-11 10:38:40	21.95	24.43	2.68852	-22.3751	-24.9032
2012-12-11 10:48:40	21.99	24.47	2.69546	-22.4159	-24.9439
2012-12-11 10:58:40	21.99	24.49	2.70241	-22.4159	-24.9643
2012-12-11 11:08:40	22.02	24.52	2.70935	-22.4465	-24.9949	2012-12-11 11:08:40
2012-12-11 11:18:40	21.82	24.31	2.7163	-22.2426	-24.7808
2012-12-11 11:28:40	22.01	24.5	2.72324	-22.4363	-24.9745
2012-12-11 11:38:40	22.05	24.54	2.73018	-22.4771	-25.0153
2012-12-11 11:48:40	22.08	24.56	2.73713	-22.5076	-25.0357
2012-12-11 11:58:40	21.46	23.93	2.74407	-21.8756	-24.3935
2012-12-11 12:08:40	21.63	24.14	2.75102	-22.0489	-24.6075	2012-12-11 12:08:40
2012-12-11 12:18:40	21.86	24.36	2.75796	-22.2834	-24.8318
2012-12-11 12:28:40	22.04	24.52	2.76491	-22.4669	-24.9949
2012-12-11 12:38:40	22.1	24.59	2.77185	-22.528	-25.0663
2012-12-11 12:48:40	22.16	24.65	2.7788	-22.5892	-25.1274
2012-12-11 12:58:40	22.24	24.71	2.78574	-22.6707	-25.1886
2012-12-11 13:08:40	22.27	24.77	2.79268	-22.7013	-25.2497	2012-12-11 13:08:40
2012-12-11 13:18:40	22.33	24.81	2.79963	-22.7625	-25.2905
2012-12-11 13:28:40	22.33	24.83	2.80657	-22.7625	-25.3109
2012-12-11 13:38:40	22.35	24.84	2.81352	-22.7829	-25.3211
2012-12-11 13:48:40	22.41	24.89	2.82046	-22.844	-25.3721
2012-12-11 13:58:40	22.44	24.92	2.82741	-22.8746	-25.4027
2012-12-11 14:08:40	22.47	24.97	2.83435	-22.9052	-25.4536	2012-12-11 14:08:40
2012-12-11 14:18:40	22.51	25	2.8413	-22.946	-25.4842
2012-12-11 14:28:40	22.42	24.93	2.84824	-22.8542	-25.4128
2012-12-11 14:38:40	22.5	25.02	2.85518	-22.9358	-25.5046
2012-12-11 14:48:40	22.54	25.04	2.86213	-22.9766	-25.525
2012-12-11 14:58:40	22.58	25.06	2.86907	-23.0173	-25.5454
2012-12-11 15:08:40	22.57	25.08	2.87602	-23.0071	-25.5657	2012-12-11 15:08:40
2012-12-11 15:18:40	22.66	25.13	2.88296	-23.0989	-25.6167
2012-12-11 15:28:40	22.66	25.15	2.88991	-23.0989	-25.6371
2012-12-11 15:38:40	22.69	25.19	2.89685	-23.1295	-25.6779
2012-12-11 15:48:40	22.73	25.22	2.9038	-23.1702	-25.7085
2012-12-11 15:58:40	22.77	25.26	2.91074	-23.211	-25.7492
2012-12-11 16:08:40	22.8	25.29	2.91768	-23.2416	-25.7798	2012-12-11 16:08:40
2012-12-11 16:18:40	22.82	25.32	2.92463	-23.262	-25.8104
2012-12-11 16:28:40	22.86	25.36	2.93157	-23.3028	-25.8512
2012-12-11 16:38:40	22.87	25.38	2.93852	-23.3129	-25.8716
2012-12-11 16:48:40	22.88	25.37	2.94546	-23.3231	-25.8614
2012-12-11 16:58:40	22.21	24.7	2.95241	-22.6402	-25.1784
2012-12-11 17:08:40	22.52	25	2.95935	-22.9562	-25.4842	2012-12-11 17:08:40
2012-12-11 17:18:40	22.7	25.2	2.9663	-23.1397	-25.6881
2012-12-11 17:28:40	22.84	25.33	2.97324	-23.2824	-25.8206
2012-12-11 17:38:40	22.72	25.21	2.98018	-23.16	-25.6983
2012-12-11 17:48:40	22.91	25.4	2.98713	-23.3537	-25.8919
2012-12-11 17:58:40	22.9	25.39	2.99407	-23.3435	-25.8818
2012-12-11 18:08:40	23	25.46	3.00102	-23.4455	-25.9531	2012-12-11 18:08:40
2012-12-11 18:18:40	23.03	25.52	3.00796	-23.476	-26.0143
2012-12-11 18:28:40	23.07	25.55	3.01491	-23.5168	-26.0449
2012-12-11 18:38:40	23.09	25.6	3.02185	-23.5372	-26.0958
2012-12-11 18:48:40	23.16	25.63	3.0288	-23.6086	-26.1264
2012-12-11 18:58:40	23.2	25.68	3.03574	-23.6493	-26.1774
2012-12-11 19:08:40	23.23	25.7	3.04268	-23.6799	-26.1978	2012-12-11 19:08:40
2012-12-11 19:18:40	23.27	25.75	3.04963	-23.7207	-26.2487
2012-12-11 19:28:40	23.32	25.8	3.05657	-23.7717	-26.2997
2012-12-11 19:38:40	23.37	25.85	3.06352	-23.8226	-26.3507
2012-12-11 19:48:40	23.42	25.91	3.07046	-23.8736	-26.4118
2012-12-11 19:58:40	23.44	25.92	3.07741	-23.894	-26.422
2012-12-11 20:08:40	23.49	25.98	3.08435	-23.945	-26.4832	2012-12-11 20:08:40
2012-12-11 20:18:40	23.53	26	3.0913	-23.9857	-26.5036
2012-12-11 20:28:40	23.52	26	3.09824	-23.9755	-26.5036
2012-12-11 20:38:40	23.56	26.03	3.10518	-24.0163	-26.5341
2012-12-11 20:48:40	23.56	26.05	3.11213	-24.0163	-26.5545
2012-12-11 20:58:40	23.61	26.09	3.11907	-24.0673	-26.5953
2012-12-11 21:08:40	23.64	26.1	3.12602	-24.0979	-26.6055	2012-12-11 21:08:40
2012-12-11 21:18:40	23.68	26.17	3.13296	-24.1386	-26.6769
2012-12-11 21:28:40	23.73	26.21	3.13991	-24.1896	-26.7176
2012-12-11 21:38:40	23.76	26.23	3.14685	-24.2202	-26.738
2012-12-11 21:48:40	23.77	26.24	3.1538	-24.2304	-26.7482
2012-12-11 21:58:40	23.79	26.28	3.16074	-24.2508	-26.789
2012-12-11 22:08:40	23.87	26.34	3.16768	-24.3323	-26.8502	2012-12-11 22:08:40
2012-12-11 22:18:40	23.89	26.35	3.17463	-24.3527	-26.8603
2012-12-11 22:28:40	23.91	26.39	3.18157	-24.3731	-26.9011
2012-12-11 22:38:40	23.94	26.41	3.18852	-24.4037	-26.9215
2012-12-11 22:48:40	23.97	26.45	3.19546	-24.4343	-26.9623
2012-12-11 22:58:40	23.98	26.46	3.20241	-24.4444	-26.9725
2012-12-11 23:08:40	23.98	26.47	3.20935	-24.4444	-26.9827	2012-12-11 23:08:40
2012-12-11 23:18:40	24.04	26.51	3.2163	-24.5056	-27.0234
2012-12-11 23:28:40	24.09	26.56	3.22324	-24.5566	-27.0744
2012-12-11 23:38:40	24.12	26.58	3.23018	-24.5872	-27.0948
2012-12-11 23:48:40	24.09	26.56	3.23713	-24.5566	-27.0744
2012-12-11 23:58:40	24.12	26.6	3.24407	-24.5872	-27.1152
2012-12-12 00:08:40	24.14	26.61	3.25102	-24.6075	-27.1254	2012-12-12 00:08:40
2012-12-12 00:18:40	24.16	26.63	3.25796	-24.6279	-27.1458
2012-12-12 00:28:40	24.18	26.66	3.26491	-24.6483	-27.1764
2012-12-12 00:38:40	24.2	26.68	3.27185	-24.6687	-27.1967
2012-12-12 00:48:40	24.25	26.73	3.2788	-24.7197	-27.2477
2012-12-12 00:58:40	24.3	26.78	3.28574	-24.7706	-27.2987
2012-12-12 01:08:40	24.32	26.81	3.29268	-24.791	-27.3293	2012-12-12 01:08:40
2012-12-12 01:18:40	24.37	26.85	3.29963	-24.842	-27.37
2012-12-12 01:28:40	24.39	26.87	3.30657	-24.8624	-27.3904
2012-12-12 01:38:40	24.42	26.9	3.31352	-24.893	-27.421
2012-12-12 01:48:40	24.46	26.94	3.32046	-24.9337	-27.4618
2012-12-12 01:58:40	24.5	26.98	3.32741	-24.9745	-27.5025
2012-12-12 02:08:40	24.53	27.01	3.33435	-25.0051	-27.5331	2012-12-12 02:08:40
2012-12-12 02:18:40	24.57	27.04	3.3413	-25.0459	-27.5637
2012-12-12 02:28:40	24.55	27.03	3.34824	-25.0255	-27.5535
2012-12-12 02:38:40	24.62	27.09	3.35518	-25.0968	-27.6147
2012-12-12 02:48:40	24.64	27.12	3.36213	-25.1172	-27.6453
2012-12-12 02:58:40	24.66	27.15	3.36907	-25.1376	-27.6758
2012-12-12 03:08:40	24.7	27.18	3.37602	-25.1784	-27.7064	2012-12-12 03:08:40
2012-12-12 03:18:40	24.7	27.17	3.38296	-25.1784	-27.6962
2012-12-12 03:28:40	24.73	27.2	3.38991	-25.209	-27.7268
2012-12-12 03:38:40	24.7	27.18	3.39685	-25.1784	-27.7064
2012-12-12 03:48:40	24.77	27.25	3.4038	-25.2497	-27.7778
2012-12-12 03:58:40	24.78	27.26	3.41074	-25.2599	-27.788
2012-12-12 04:08:40	24.83	27.3	3.41768	-25.3109	-27.8287	2012-12-12 04:08:40
2012-12-12 04:18:40	24.88	27.36	3.42463	-25.3619	-27.8899
2012-12-12 04:28:40	24.89	27.38	3.43157	-25.3721	-27.9103
2012-12-12 04:38:40	24.93	27.41	3.43852	-25.4128	-27.9409
2012-12-12 04:48:40	24.9	27.37	3.44546	-25.3823	-27.9001
2012-12-12 04:58:40	24.95	27.43	3.45241	-25.4332	-27.9613
2012-12-12 05:08:40	24.96	27.44	3.45935	-25.4434	-27.9715	2012-12-12 05:08:40
2012-12-12 05:18:40	25.01	27.5	3.4663	-25.4944	-28.0326
2012-12-12 05:28:40	25.08	27.55	3.47324	-25.5657	-28.0836
2012-12-12 05:38:40	25.09	27.57	3.48018	-25.5759	-28.104
2012-12-12 05:48:40	25.1	27.59	3.48713	-25.5861	-28.1244
2012-12-12 05:58:40	25.15	27.63	3.49407	-25.6371	-28.1651
2012-12-12 06:08:40	25.18	27.66	3.50102	-25.6677	-28.1957	2012-12-12 06:08:40
2012-12-12 06:18:40	25.21	27.67	3.50796	-25.6983	-28.2059
2012-12-12 06:28:40	25.24	27.71	3.51491	-25.7288	-28.2467
2012-12-12 06:38:40	25.25	27.73	3.52185	-25.739	-28.2671
2012-12-12 06:48:40	25.29	27.76	3.5288	-25.7798	-28.2977
2012-12-12 06:58:40	25.33	27.81	3.53574	-25.8206	-28.3486
2012-12-12 07:08:40	25.34	27.82	3.54268	-25.8308	-28.3588	2012-12-12 07:08:40
2012-12-12 07:18:40	25.38	27.86	3.54963	-25.8716	-28.3996
2012-12-12 07:28:40	25.4	27.88	3.55657	-25.8919	-28.42
2012-12-12 07:38:40	25.41	27.89	3.56352	-25.9021	-28.4302
2012-12-12 07:48:40	25.44	27.92	3.57046	-25.9327	-28.4608
2012-12-12 07:58:40	25.42	27.91	3.57741	-25.9123	-28.4506
2012-12-12 08:08:40	25.48	27.97	3.58435	-25.9735	-28.5117	2012-12-12 08:08:40
2012-12-12 08:18:40	25.52	28.01	3.5913	-26.0143	-28.5525
2012-12-12 08:28:40	25.56	28.05	3.59824	-26.055	-28.5933
2012-12-12 08:38:40	25.55	28.05	3.60518	-26.0449	-28.5933
2012-12-12 08:48:40	25.62	28.09	3.61213	-26.1162	-28.634
2012-12-12 08:58:40	25.66	28.15	3.61907	-26.157	-28.6952
2012-12-12 09:08:40	25.68	28.16	3.62602	-26.1774	-28.7054	2012-12-12 09:08:40
2012-12-12 09:18:40	25.69	28.18	3.63296	-26.1876	-28.7258
2012-12-12 09:28:40	25.15	27.63	3.63991	-25.6371	-28.1651
2012-12-12 09:38:40	25.4	27.88	3.64685	-25.8919	-28.42
2012-12-12 09:48:40	25.58	28.07	3.6538	-26.0754	-28.6137
2012-12-12 09:58:40	25.74	28.16	3.66074	-26.2385	-28.7054
2012-12-12 10:08:40	25.77	28.24	3.66768	-26.2691	-28.787	2012-12-12 10:08:40
2012-12-12 10:18:40	25.8	28.28	3.67463	-26.2997	-28.8277
2012-12-12 10:28:40	25.83	28.3	3.68157	-26.3303	-28.8481
2012-12-12 10:38:40	25.86	28.34	3.68852	-26.3609	-28.8889
2012-12-12 10:48:40	25.9	28.33	3.69546	-26.4016	-28.8787
2012-12-12 10:58:40	25.92	28.39	3.70241	-26.422	-28.9399
2012-12-12 11:08:40	25.95	28.41	3.70935	-26.4526	-28.9602	2012-12-12 11:08:40
2012-12-12 11:18:40	25.97	28.46	3.7163	-26.473	-29.0112
2012-12-12 11:28:40	26.02	28.5	3.72324	-26.524	-29.052
2012-12-12 11:38:40	26.03	28.5	3.73018	-26.5341	-29.052
2012-12-12 11:48:40	26.03	28.53	3.73713	-26.5341	-29.0826
2012-12-12 11:58:40	26.08	28.56	3.74407	-26.5851	-29.1131
2012-12-12 12:08:40	26.1	28.58	3.75102	-26.6055	-29.1335	2012-12-12 12:08:40
2012-12-12 12:18:40	26.16	28.62	3.75796	-26.6667	-29.1743
2012-12-12 12:28:40	26.13	28.6	3.76491	-26.6361	-29.1539
2012-12-12 12:38:40	26.18	28.66	3.77185	-26.6871	-29.2151
2012-12-12 12:48:40	26.24	28.72	3.7788	-26.7482	-29.2762
2012-12-12 12:58:40	26.25	28.73	3.78574	-26.7584	-29.2864
2012-12-12 13:08:40	26.3	28.76	3.79268	-26.8094	-29.317	2012-12-12 13:08:40
2012-12-12 13:18:40	26.3	28.76	3.79963	-26.8094	-29.317
2012-12-12 13:28:40	26.33	28.81	3.80657	-26.84	-29.368
2012-12-12 13:38:40	26.38	28.85	3.81352	-26.8909	-29.4088
2012-12-12 13:48:40	26.41	28.88	3.82046	-26.9215	-29.4393
2012-12-12 13:58:40	26.46	28.94	3.82741	-26.9725	-29.5005
2012-12-12 14:08:40	26.45	28.84	3.83435	-26.9623	-29.3986	2012-12-12 14:08:40
2012-12-12 14:18:40	26.49	28.96	3.8413	-27.0031	-29.5209
2012-12-12 14:28:40	26.54	29.01	3.84824	-27.054	-29.5719
2012-12-12 14:38:40	26.56	29.01	3.85518	-27.0744	-29.5719
2012-12-12 14:48:40	26.6	29.08	3.86213	-27.1152	-29.6432
2012-12-12 14:58:40	26.62	29.1	3.86907	-27.1356	-29.6636
2012-12-12 15:08:40	26.57	29.05	3.87602	-27.0846	-29.6126	2012-12-12 15:08:40
2012-12-12 15:18:40	26.46	28.93	3.88296	-26.9725	-29.4903
2012-12-12 15:28:40	26.64	29.1	3.88991	-27.156	-29.6636
2012-12-12 15:38:40	26.64	29.13	3.89685	-27.156	-29.6942
2012-12-12 15:48:40	26.68	29.15	3.9038	-27.1967	-29.7146
2012-12-12 15:58:40	26.75	29.22	3.91074	-27.2681	-29.7859
2012-12-12 16:08:40	26.73	29.21	3.91768	-27.2477	-29.7757	2012-12-12 16:08:40
2012-12-12 16:18:40	26.8	29.27	3.92463	-27.3191	-29.8369
2012-12-12 16:28:40	26.78	29.25	3.93157	-27.2987	-29.8165
2012-12-12 16:38:40	26.75	29.31	3.93852	-27.2681	-29.8777
2012-12-12 16:48:40	26.88	29.34	3.94546	-27.4006	-29.9083
2012-12-12 16:58:40	26.87	29.33	3.95241	-27.3904	-29.8981
2012-12-12 17:08:40	26.82	29.31	3.95935	-27.3394	-29.8777	2012-12-12 17:08:40
2012-12-12 17:18:40	26.91	29.39	3.9663	-27.4312	-29.9592
2012-12-12 17:28:40	26.58	29.02	3.97324	-27.0948	-29.5821
2012-12-12 17:38:40	26.75	29.24	3.98018	-27.2681	-29.8063
2012-12-12 17:48:40	26.85	29.31	3.98713	-27.37	-29.8777
2012-12-12 17:58:40	26.97	29.45	3.99407	-27.4924	-30.0204
2012-12-12 18:08:40	27	29.48	4.00102	-27.5229	-30.051	2012-12-12 18:08:40
2012-12-12 18:18:40	27.02	29.51	4.00796	-27.5433	-30.0815
2012-12-12 18:28:40	27.06	29.54	4.01491	-27.5841	-30.1121
2012-12-12 18:38:40	27.11	29.58	4.02185	-27.6351	-30.1529
2012-12-12 18:48:40	27.14	29.62	4.0288	-27.6656	-30.1937
2012-12-12 18:58:40	27.18	29.66	4.03574	-27.7064	-30.2345
2012-12-12 19:08:40	27.23	29.71	4.04268	-27.7574	-30.2854	2012-12-12 19:08:40
2012-12-12 19:18:40	27.26	29.73	4.04963	-27.788	-30.3058
2012-12-12 19:28:40	27.29	29.78	4.05657	-27.8186	-30.3568
2012-12-12 19:38:40	27.35	29.8	4.06352	-27.8797	-30.3772
2012-12-12 19:48:40	27.36	29.84	4.07046	-27.8899	-30.4179
2012-12-12 19:58:40	27.41	29.88	4.07741	-27.9409	-30.4587
2012-12-12 20:08:40	27.43	29.91	4.08435	-27.9613	-30.4893	2012-12-12 20:08:40
2012-12-12 20:18:40	27.45	29.92	4.0913	-27.9817	-30.4995
2012-12-12 20:28:40	27.48	29.95	4.09824	-28.0122	-30.5301
2012-12-12 20:38:40	27.52	30	4.10518	-28.053	-30.581
2012-12-12 20:48:40	27.54	30.02	4.11213	-28.0734	-30.6014
2012-12-12 20:58:40	27.57	30.02	4.11907	-28.104	-30.6014
2012-12-12 21:08:40	27.65	30.11	4.12602	-28.1855	-30.6932	2012-12-12 21:08:40
2012-12-12 21:18:40	27.67	30.14	4.13296	-28.2059	-30.7238
2012-12-12 21:28:40	27.69	30.18	4.13991	-28.2263	-30.7645
2012-12-12 21:38:40	27.75	30.23	4.14685	-28.2875	-30.8155
2012-12-12 21:48:40	27.78	30.26	4.1538	-28.318	-30.8461
2012-12-12 21:58:40	27.81	30.28	4.16074	-28.3486	-30.8665
2012-12-12 22:08:40	27.85	30.32	4.16768	-28.3894	-30.9072	2012-12-12 22:08:40
2012-12-12 22:18:40	27.9	30.37	4.17463	-28.4404	-30.9582
2012-12-12 22:28:40	27.89	30.37	4.18157	-28.4302	-30.9582
2012-12-12 22:38:40	27.93	30.41	4.18852	-28.4709	-30.999
2012-12-12 22:48:40	27.96	30.44	4.19546	-28.5015	-31.0296
2012-12-12 22:58:40	28	30.48	4.20241	-28.5423	-31.0703
2012-12-12 23:08:40	28.03	30.51	4.20935	-28.5729	-31.1009	2012-12-12 23:08:40
2012-12-12 23:18:40	28.08	30.56	4.2163	-28.6239	-31.1519
2012-12-12 23:28:40	28.11	30.59	4.22324	-28.6544	-31.1825
2012-12-12 23:38:40	28.15	30.63	4.23018	-28.6952	-31.2232
2012-12-12 23:48:40	28.18	30.66	4.23713	-28.7258	-31.2538
2012-12-12 23:58:40	28.23	30.71	4.24407	-28.7768	-31.3048
2012-12-13 00:08:40	28.23	30.71	4.25102	-28.7768	-31.3048	2012-12-13 00:08:40
2012-12-13 00:18:40	28.29	30.77	4.25796	-28.8379	-31.366
2012-12-13 00:28:40	28.28	30.77	4.26491	-28.8277	-31.366
2012-12-13 00:38:40	28.34	30.8	4.27185	-28.8889	-31.3965
2012-12-13 00:48:40	28.35	30.83	4.2788	-28.8991	-31.4271
2012-12-13 00:58:40	28.35	30.83	4.28574	-28.8991	-31.4271
2012-12-13 01:08:40	28.4	30.88	4.29268	-28.9501	-31.4781	2012-12-13 01:08:40
2012-12-13 01:18:40	28.45	30.91	4.29963	-29.001	-31.5087
2012-12-13 01:28:40	28.2	30.68	4.30657	-28.7462	-31.2742
2012-12-13 01:38:40	28.36	30.84	4.31352	-28.9093	-31.4373
2012-12-13 01:48:40	28.45	30.92	4.32046	-29.001	-31.5189
2012-12-13 01:58:40	28.49	30.97	4.32741	-29.0418	-31.5698
2012-12-13 02:08:40	28.53	30.99	4.33435	-29.0826	-31.5902	2012-12-13 02:08:40
2012-12-13 02:18:40	28.55	31.04	4.3413	-29.103	-31.6412
2012-12-13 02:28:40	28.6	31.07	4.34824	-29.1539	-31.6718
2012-12-13 02:38:40	28.62	31.1	4.35518	-29.1743	-31.7023
2012-12-13 02:48:40	28.67	31.15	4.36213	-29.2253	-31.7533
2012-12-13 02:58:40	28.7	31.18	4.36907	-29.2559	-31.7839
2012-12-13 03:08:40	28.72	31.21	4.37602	-29.2762	-31.8145	2012-12-13 03:08:40
2012-12-13 03:18:40	28.77	31.25	4.38296	-29.3272	-31.8552
2012-12-13 03:28:40	28.77	31.26	4.38991	-29.3272	-31.8654
2012-12-13 03:38:40	28.81	31.28	4.39685	-29.368	-31.8858
2012-12-13 03:48:40	28.86	31.32	4.4038	-29.419	-31.9266
2012-12-13 03:58:40	28.88	31.36	4.41074	-29.4393	-31.9674
2012-12-13 04:08:40	28.92	31.39	4.41768	-29.4801	-31.998	2012-12-13 04:08:40
2012-12-13 04:18:40	28.97	31.43	4.42463	-29.5311	-32.0387
2012-12-13 04:28:40	28.94	31.42	4.43157	-29.5005	-32.0285
2012-12-13 04:38:40	28.97	31.45	4.43852	-29.5311	-32.0591
2012-12-13 04:48:40	29.01	31.49	4.44546	-29.5719	-32.0999
2012-12-13 04:58:40	29.06	31.55	4.45241	-29.6228	-32.1611
2012-12-13 05:08:40	29.08	31.57	4.45935	-29.6432	-32.1814	2012-12-13 05:08:40
2012-12-13 05:18:40	29.12	31.6	4.4663	-29.684	-32.212
2012-12-13 05:28:40	29.17	31.66	4.47324	-29.735	-32.2732
2012-12-13 05:38:40	29.21	31.7	4.48018	-29.7757	-32.314
2012-12-13 05:48:40	29.2	31.68	4.48713	-29.7655	-32.2936
2012-12-13 05:58:40	29.23	31.7	4.49407	-29.7961	-32.314
2012-12-13 06:08:40	29.28	31.76	4.50102	-29.8471	-32.3751	2012-12-13 06:08:40
2012-12-13 06:18:40	29.33	31.8	4.50796	-29.8981	-32.4159
2012-12-13 06:28:40	29.34	31.82	4.51491	-29.9083	-32.4363
2012-12-13 06:38:40	29.4	31.88	4.52185	-29.9694	-32.4975
2012-12-13 06:48:40	29.4	31.88	4.5288	-29.9694	-32.4975
2012-12-13 06:58:40	29.45	31.93	4.53574	-30.0204	-32.5484
2012-12-13 07:08:40	29.47	31.95	4.54268	-30.0408	-32.5688	2012-12-13 07:08:40
2012-12-13 07:18:40	29.51	31.97	4.54963	-30.0815	-32.5892
2012-12-13 07:28:40	29.54	32.03	4.55657	-30.1121	-32.6504
2012-12-13 07:38:40	29.59	32.06	4.56352	-30.1631	-32.6809
2012-12-13 07:48:40	29.6	32.07	4.57046	-30.1733	-32.6911
2012-12-13 07:58:40	29.66	32.15	4.57741	-30.2345	-32.7727
2012-12-13 08:08:40	29.69	32.17	4.58435	-30.265	-32.7931	2012-12-13 08:08:40
2012-12-13 08:18:40	29.72	32.21	4.5913	-30.2956	-32.8338
2012-12-13 08:28:40	29.76	32.23	4.59824	-30.3364	-32.8542
2012-12-13 08:38:40	29.77	32.26	4.60518	-30.3466	-32.8848
2012-12-13 08:48:40	29.78	32.26	4.61213	-30.3568	-32.8848
2012-12-13 08:58:40	29.82	32.3	4.61907	-30.3976	-32.9256
2012-12-13 09:08:40	29.85	32.34	4.62602	-30.4281	-32.9664	2012-12-13 09:08:40
2012-12-13 09:18:40	29.9	32.39	4.63296	-30.4791	-33.0173
2012-12-13 09:28:40	29.92	32.41	4.63991	-30.4995	-33.0377
2012-12-13 09:38:40	29.95	32.44	4.64685	-30.5301	-33.0683
2012-12-13 09:48:40	30.01	32.49	4.6538	-30.5912	-33.1193
2012-12-13 09:58:40	29.74	32.25	4.66074	-30.316	-32.8746
2012-12-13 10:08:40	29.94	32.46	4.66768	-30.5199	-33.0887	2012-12-13 10:08:40
2012-12-13 10:18:40	30.04	32.55	4.67463	-30.6218	-33.1804
2012-12-13 10:28:40	30.1	32.61	4.68157	-30.683	-33.2416
2012-12-13 10:38:40	30.12	32.62	4.68852	-30.7034	-33.2518
2012-12-13 10:48:40	30.18	32.67	4.69546	-30.7645	-33.3028
2012-12-13 10:58:40	30.09	32.59	4.70241	-30.6728	-33.2212
2012-12-13 11:08:40	30.21	32.7	4.70935	-30.7951	-33.3333	2012-12-13 11:08:40
2012-12-13 11:18:40	30.23	32.74	4.7163	-30.8155	-33.3741
2012-12-13 11:28:40	30.24	32.75	4.72324	-30.8257	-33.3843
2012-12-13 11:38:40	30.3	32.81	4.73018	-30.8869	-33.4455
2012-12-13 11:48:40	30.35	32.85	4.73713	-30.9378	-33.4862
2012-12-13 11:58:40	30.39	32.9	4.74407	-30.9786	-33.5372
2012-12-13 12:08:40	30.44	32.93	4.75102	-31.0296	-33.5678	2012-12-13 12:08:40
2012-12-13 12:18:40	30.48	32.98	4.75796	-31.0703	-33.6188
2012-12-13 12:28:40	30.48	33	4.76491	-31.0703	-33.6391
2012-12-13 12:38:40	30.56	33.07	4.77185	-31.1519	-33.7105
2012-12-13 12:48:40	30.4	32.92	4.7788	-30.9888	-33.5576
2012-12-13 12:58:40	30.56	33.07	4.78574	-31.1519	-33.7105
2012-12-13 13:08:40	30.59	33.11	4.79268	-31.1825	-33.7513	2012-12-13 13:08:40
2012-12-13 13:18:40	30.62	33.13	4.79963	-31.213	-33.7717
2012-12-13 13:28:40	30.68	33.2	4.80657	-31.2742	-33.843
2012-12-13 13:38:40	30.65	33.14	4.81352	-31.2436	-33.7819
2012-12-13 13:48:40	30.71	33.21	4.82046	-31.3048	-33.8532
2012-12-13 13:58:40	30.74	33.24	4.82741	-31.3354	-33.8838
2012-12-13 14:08:40	30.66	33.17	4.83435	-31.2538	-33.8124	2012-12-13 14:08:40
2012-12-13 14:18:40	30.79	33.29	4.8413	-31.3863	-33.9348
2012-12-13 14:28:40	30.82	33.32	4.84824	-31.4169	-33.9653
2012-12-13 14:38:40	30.85	33.35	4.85518	-31.4475	-33.9959
2012-12-13 14:48:40	30.91	33.41	4.86213	-31.5087	-34.0571
2012-12-13 14:58:40	30.97	33.46	4.86907	-31.5698	-34.1081
2012-12-13 15:08:40	31.01	33.51	4.87602	-31.6106	-34.159	2012-12-13 15:08:40
2012-12-13 15:18:40	31.1	33.58	4.88296	-31.7023	-34.2304
2012-12-13 15:28:40	31.13	33.62	4.88991	-31.7329	-34.2712
2012-12-13 15:38:40	31.18	33.68	4.89685	-31.7839	-34.3323
2012-12-13 15:48:40	31.22	33.7	4.9038	-31.8247	-34.3527
2012-12-13 15:58:40	31.29	33.78	4.91074	-31.896	-34.4343
2012-12-13 16:08:40	31.34	33.81	4.91768	-31.947	-34.4648	2012-12-13 16:08:40
2012-12-13 16:18:40	31.39	33.88	4.92463	-31.998	-34.5362
2012-12-13 16:28:40	31.42	33.92	4.93157	-32.0285	-34.577
2012-12-13 16:38:40	31.48	33.97	4.93852	-32.0897	-34.6279
2012-12-13 16:48:40	31.51	34.01	4.94546	-32.1203	-34.6687
2012-12-13 16:58:40	31.55	34.04	4.95241	-32.1611	-34.6993
2012-12-13 17:08:40	31.59	34.08	4.95935	-32.2018	-34.7401	2012-12-13 17:08:40
2012-12-13 17:18:40	31.65	34.14	4.9663	-32.263	-34.8012
2012-12-13 17:28:40	31.71	34.2	4.97324	-32.3242	-34.8624
2012-12-13 17:38:40	31.79	34.28	4.98018	-32.4057	-34.9439
2012-12-13 17:48:40	31.84	34.33	4.98713	-32.4567	-34.9949
2012-12-13 17:58:40	31.91	34.38	4.99407	-32.528	-35.0459
2012-12-13 18:08:40	31.95	34.43	5.00102	-32.5688	-35.0968	2012-12-13 18:08:40
2012-12-13 18:18:40	31.99	34.48	5.00796	-32.6096	-35.1478
2012-12-13 18:28:40	32.03	34.52	5.01491	-32.6504	-35.1886
2012-12-13 18:38:40	32.1	34.59	5.02185	-32.7217	-35.2599
2012-12-13 18:48:40	32.15	34.65	5.0288	-32.7727	-35.3211
2012-12-13 18:58:40	32.22	34.71	5.03574	-32.844	-35.3823
2012-12-13 19:08:40	32.26	34.76	5.04268	-32.8848	-35.4332	2012-12-13 19:08:40
2012-12-13 19:18:40	32.32	34.81	5.04963	-32.946	-35.4842
2012-12-13 19:28:40	32.36	34.85	5.05657	-32.9867	-35.525
2012-12-13 19:38:40	32.42	34.9	5.06352	-33.0479	-35.5759
2012-12-13 19:48:40	32.45	34.94	5.07046	-33.0785	-35.6167
2012-12-13 19:58:40	32.51	35	5.07741	-33.1397	-35.6779
2012-12-13 20:08:40	32.54	35.03	5.08435	-33.1702	-35.7085	2012-12-13 20:08:40
2012-12-13 20:18:40	32.56	35.05	5.0913	-33.1906	-35.7288
2012-12-13 20:28:40	32.67	35.14	5.09824	-33.3028	-35.8206
2012-12-13 20:38:40	32.69	35.19	5.10518	-33.3231	-35.8716
2012-12-13 20:48:40	32.75	35.25	5.11213	-33.3843	-35.9327
2012-12-13 20:58:40	32.82	35.31	5.11907	-33.4557	-35.9939
2012-12-13 21:08:40	32.89	35.36	5.12602	-33.527	-36.0449	2012-12-13 21:08:40
2012-12-13 21:18:40	32.91	35.42	5.13296	-33.5474	-36.106
2012-12-13 21:28:40	32.99	35.47	5.13991	-33.629	-36.157
2012-12-13 21:38:40	33.06	35.53	5.14685	-33.7003	-36.2181
2012-12-13 21:48:40	33.09	35.59	5.1538	-33.7309	-36.2793
2012-12-13 21:58:40	33.17	35.67	5.16074	-33.8124	-36.3609
2012-12-13 22:08:40	32.99	35.48	5.16768	-33.629	-36.1672	2012-12-13 22:08:40
2012-12-13 22:18:40	33.14	35.65	5.17463	-33.7819	-36.3405
2012-12-13 22:28:40	33.23	35.73	5.18157	-33.8736	-36.422
2012-12-13 22:38:40	33.26	35.77	5.18852	-33.9042	-36.4628
2012-12-13 22:48:40	33.32	35.83	5.19546	-33.9653	-36.524
2012-12-13 22:58:40	33.39	35.9	5.20241	-34.0367	-36.5953
2012-12-13 23:08:40	33.44	35.94	5.20935	-34.0877	-36.6361	2012-12-13 23:08:40
2012-12-13 23:18:40	33.47	35.98	5.2163	-34.1182	-36.6769
2012-12-13 23:28:40	33.54	36.04	5.22324	-34.1896	-36.738
2012-12-13 23:38:40	33.59	36.08	5.23018	-34.2406	-36.7788
2012-12-13 23:48:40	33.64	36.16	5.23713	-34.2915	-36.8603
2012-12-13 23:58:40	33.69	36.19	5.24407	-34.3425	-36.8909
2012-12-14 00:08:40	33.76	36.26	5.25102	-34.4139	-36.9623	2012-12-14 00:08:40
2012-12-14 00:18:40	33.81	36.31	5.25796	-34.4648	-37.0133
2012-12-14 00:28:40	33.87	36.39	5.26491	-34.526	-37.0948
2012-12-14 00:38:40	33.92	36.43	5.27185	-34.577	-37.1356
2012-12-14 00:48:40	34	36.5	5.2788	-34.6585	-37.2069
2012-12-14 00:58:40	34.02	36.53	5.28574	-34.6789	-37.2375
2012-12-14 01:08:40	34.06	36.58	5.29268	-34.7197	-37.2885	2012-12-14 01:08:40
2012-12-14 01:18:40	34.11	36.63	5.29963	-34.7706	-37.3394
2012-12-14 01:28:40	34.17	36.67	5.30657	-34.8318	-37.3802
2012-12-14 01:38:40	34.21	36.71	5.31352	-34.8726	-37.421
2012-12-14 01:48:40	34.28	36.78	5.32046	-34.9439	-37.4924
2012-12-14 01:58:40	34.29	36.78	5.32741	-34.9541	-37.4924
2012-12-14 02:08:40	34.36	36.86	5.33435	-35.0255	-37.5739	2012-12-14 02:08:40
2012-12-14 02:18:40	34.39	36.89	5.3413	-35.0561	-37.6045
2012-12-14 02:28:40	34.46	36.97	5.34824	-35.1274	-37.686
2012-12-14 02:38:40	34.52	37.04	5.35518	-35.1886	-37.7574
2012-12-14 02:48:40	34.51	37.03	5.36213	-35.1784	-37.7472
2012-12-14 02:58:40	34.59	37.09	5.36907	-35.2599	-37.8084
2012-12-14 03:08:40	34.65	37.16	5.37602	-35.3211	-37.8797	2012-12-14 03:08:40
2012-12-14 03:18:40	34.69	37.21	5.38296	-35.3619	-37.9307
2012-12-14 03:28:40	34.72	37.23	5.38991	-35.3925	-37.9511
2012-12-14 03:38:40	34.81	37.31	5.39685	-35.4842	-38.0326
2012-12-14 03:48:40	34.83	37.35	5.4038	-35.5046	-38.0734
2012-12-14 03:58:40	34.89	37.4	5.41074	-35.5657	-38.1244
2012-12-14 04:08:40	34.94	37.45	5.41768	-35.6167	-38.1753	2012-12-14 04:08:40
2012-12-14 04:18:40	35	37.5	5.42463	-35.6779	-38.2263
2012-12-14 04:28:40	35.05	37.57	5.43157	-35.7288	-38.2977
2012-12-14 04:38:40	35.06	37.57	5.43852	-35.739	-38.2977
2012-12-14 04:48:40	35.14	37.65	5.44546	-35.8206	-38.3792
2012-12-14 04:58:40	35.17	37.67	5.45241	-35.8512	-38.3996
2012-12-14 05:08:40	35.24	37.75	5.45935	-35.9225	-38.4811	2012-12-14 05:08:40
2012-12-14 05:18:40	35.29	37.79	5.4663	-35.9735	-38.5219
2012-12-14 05:28:40	35.31	37.79	5.47324	-35.9939	-38.5219
2012-12-14 05:38:40	35.38	37.89	5.48018	-36.0652	-38.6239
2012-12-14 05:48:40	35.44	37.93	5.48713	-36.1264	-38.6646
2012-12-14 05:58:40	35.46	37.98	5.49407	-36.1468	-38.7156
2012-12-14 06:08:40	35.52	38.01	5.50102	-36.208	-38.7462	2012-12-14 06:08:40
2012-12-14 06:18:40	35.55	38.06	5.50796	-36.2385	-38.7971
2012-12-14 06:28:40	35.61	38.12	5.51491	-36.2997	-38.8583
2012-12-14 06:38:40	35.65	38.19	5.52185	-36.3405	-38.9297
2012-12-14 06:48:40	35.74	38.24	5.5288	-36.4322	-38.9806
2012-12-14 06:58:40	35.77	38.29	5.53574	-36.4628	-39.0316
2012-12-14 07:08:40	35.82	38.33	5.54268	-36.5138	-39.0724	2012-12-14 07:08:40
2012-12-14 07:18:40	35.87	38.39	5.54963	-36.5647	-39.1335
2012-12-14 07:28:40	35.9	38.42	5.55657	-36.5953	-39.1641
2012-12-14 07:38:40	35.94	38.46	5.56352	-36.6361	-39.2049
2012-12-14 07:48:40	36	38.52	5.57046	-36.6972	-39.2661
2012-12-14 07:58:40	36.05	38.56	5.57741	-36.7482	-39.3068
2012-12-14 08:08:40	36.05	38.57	5.58435	-36.7482	-39.317	2012-12-14 08:08:40
2012-12-14 08:18:40	36.07	38.58	5.5913	-36.7686	-39.3272
2012-12-14 08:28:40	36.1	38.62	5.59824	-36.7992	-39.368
2012-12-14 08:38:40	36.15	38.65	5.60518	-36.8502	-39.3986
2012-12-14 08:48:40	36.17	38.69	5.61213	-36.8705	-39.4393
2012-12-14 08:58:40	36.22	38.7	5.61907	-36.9215	-39.4495
2012-12-14 09:08:40	36.26	38.78	5.62602	-36.9623	-39.5311	2012-12-14 09:08:40
2012-12-14 09:18:40	36.32	38.83	5.63296	-37.0234	-39.5821
2012-12-14 09:28:40	36.16	38.67	5.63991	-36.8603	-39.419
2012-12-14 09:38:40	36.34	38.84	5.64685	-37.0438	-39.5923
2012-12-14 09:48:40	36.41	38.92	5.6538	-37.1152	-39.6738
2012-12-14 09:58:40	36.44	38.94	5.66074	-37.1458	-39.6942
2012-12-14 10:08:40	36.5	39.01	5.66768	-37.2069	-39.7655	2012-12-14 10:08:40
2012-12-14 10:18:40	36.54	39.04	5.67463	-37.2477	-39.7961
2012-12-14 10:28:40	36.58	39.09	5.68157	-37.2885	-39.8471
2012-12-14 10:38:40	36.62	39.14	5.68852	-37.3293	-39.8981
2012-12-14 10:48:40	36.67	39.18	5.69546	-37.3802	-39.9388
2012-12-14 10:58:40	36.72	39.23	5.70241	-37.4312	-39.9898
2012-12-14 11:08:40	36.77	39.28	5.70935	-37.4822	-40.0408	2012-12-14 11:08:40
2012-12-14 11:18:40	36.81	39.31	5.7163	-37.5229	-40.0714
2012-12-14 11:28:40	36.86	39.38	5.72324	-37.5739	-40.1427
2012-12-14 11:38:40	36.94	39.45	5.73018	-37.6555	-40.2141
2012-12-14 11:48:40	36.97	39.49	5.73713	-37.686	-40.2548
2012-12-14 11:58:40	37.04	39.49	5.74407	-37.7574	-40.2548
2012-12-14 12:08:40	37.06	39.6	5.75102	-37.7778	-40.367	2012-12-14 12:08:40
2012-12-14 12:18:40	37.08	39.61	5.75796	-37.7982	-40.3772
2012-12-14 12:28:40	37.15	39.67	5.76491	-37.8695	-40.4383
2012-12-14 12:38:40	37.22	39.73	5.77185	-37.9409	-40.4995
2012-12-14 12:48:40	37.24	39.76	5.7788	-37.9613	-40.5301
2012-12-14 12:58:40	37.27	39.8	5.78574	-37.9918	-40.5708
2012-12-14 13:08:40	37.33	39.85	5.79268	-38.053	-40.6218	2012-12-14 13:08:40
2012-12-14 13:18:40	37.39	39.9	5.79963	-38.1142	-40.6728
2012-12-14 13:28:40	37.45	39.95	5.80657	-38.1753	-40.7238
2012-12-14 13:38:40	37.51	40.02	5.81352	-38.2365	-40.7951
2012-12-14 13:48:40	37.54	40.06	5.82046	-38.2671	-40.8359
2012-12-14 13:58:40	37.6	40.11	5.82741	-38.3282	-40.8869
2012-12-14 14:08:40	37.62	40.14	5.83435	-38.3486	-40.9174	2012-12-14 14:08:40
2012-12-14 14:18:40	37.67	40.19	5.8413	-38.3996	-40.9684
2012-12-14 14:28:40	37.75	40.27	5.84824	-38.4811	-41.0499
2012-12-14 14:38:40	37.8	40.31	5.85518	-38.5321	-41.0907
2012-12-14 14:48:40	37.88	40.38	5.86213	-38.6137	-41.1621
2012-12-14 14:58:40	37.91	40.42	5.86907	-38.6442	-41.2029
2012-12-14 15:08:40	37.93	40.44	5.87602	-38.6646	-41.2232	2012-12-14 15:08:40
2012-12-14 15:18:40	38.01	40.53	5.88296	-38.7462	-41.315
2012-12-14 15:28:40	38.05	40.57	5.88991	-38.787	-41.3558
2012-12-14 15:38:40	38.12	40.63	5.89685	-38.8583	-41.4169
2012-12-14 15:48:40	38.16	40.67	5.9038	-38.8991	-41.4577
2012-12-14 15:58:40	38.24	40.76	5.91074	-38.9806	-41.5494
2012-12-14 16:08:40	38.27	40.79	5.91768	-39.0112	-41.58	2012-12-14 16:08:40
2012-12-14 16:18:40	38.36	40.88	5.92463	-39.103	-41.6718
2012-12-14 16:28:40	38.44	40.96	5.93157	-39.1845	-41.7533
2012-12-14 16:38:40	38.47	40.98	5.93852	-39.2151	-41.7737
2012-12-14 16:48:40	38.53	41.04	5.94546	-39.2762	-41.8349
2012-12-14 16:58:40	38.62	41.13	5.95241	-39.368	-41.9266
2012-12-14 17:08:40	38.69	41.22	5.95935	-39.4393	-42.0183	2012-12-14 17:08:40
2012-12-14 17:18:40	38.76	41.27	5.9663	-39.5107	-42.0693
2012-12-14 17:28:40	38.8	41.32	5.97324	-39.5515	-42.1203
2012-12-14 17:38:40	38.87	41.38	5.98018	-39.6228	-42.1814
2012-12-14 17:48:40	38.93	41.45	5.98713	-39.684	-42.2528
2012-12-14 17:58:40	38.97	41.48	5.99407	-39.7248	-42.2834
2012-12-14 18:08:40	39.05	41.56	6.00102	-39.8063	-42.3649	2012-12-14 18:08:40
2012-12-14 18:18:40	39.11	41.63	6.00796	-39.8675	-42.4363
2012-12-14 18:28:40	39.16	41.68	6.01491	-39.9185	-42.4873
2012-12-14 18:38:40	38.81	41.41	6.02185	-39.5617	-42.212
2012-12-14 18:48:40	38.74	41.26	6.0288	-39.4903	-42.0591
2012-12-14 18:58:40	39.11	41.63	6.03574	-39.8675	-42.4363
2012-12-14 19:08:40	39.22	41.72	6.04268	-39.9796	-42.528	2012-12-14 19:08:40
2012-12-14 19:18:40	39.29	41.81	6.04963	-40.051	-42.6198
2012-12-14 19:28:40	39.38	41.9	6.05657	-40.1427	-42.7115
2012-12-14 19:38:40	39.47	41.99	6.06352	-40.2345	-42.8033
2012-12-14 19:48:40	39.55	42.07	6.07046	-40.316	-42.8848
2012-12-14 19:58:40	39.63	42.17	6.07741	-40.3976	-42.9867
2012-12-14 20:08:40	39.6	42.11	6.08435	-40.367	-42.9256	2012-12-14 20:08:40
2012-12-14 20:18:40	39.71	42.23	6.0913	-40.4791	-43.0479
2012-12-14 20:28:40	39.83	42.33	6.09824	-40.6014	-43.1498
2012-12-14 20:38:40	39.88	42.38	6.10518	-40.6524	-43.2008
2012-12-14 20:48:40	39.94	42.43	6.11213	-40.7136	-43.2518
2012-12-14 20:58:40	40.01	42.5	6.11907	-40.7849	-43.3231
2012-12-14 21:08:40	40.1	42.6	6.12602	-40.8767	-43.4251	2012-12-14 21:08:40
2012-12-14 21:18:40	40.18	42.68	6.13296	-40.9582	-43.5066
2012-12-14 21:28:40	40.24	42.74	6.13991	-41.0194	-43.5678
2012-12-14 21:38:40	40.34	42.82	6.14685	-41.1213	-43.6493
2012-12-14 21:48:40	40.37	42.88	6.1538	-41.1519	-43.7105
2012-12-14 21:58:40	40.46	42.97	6.16074	-41.2436	-43.8022
2012-12-14 22:08:40	40.54	43.03	6.16768	-41.3252	-43.8634	2012-12-14 22:08:40
2012-12-14 22:18:40	40.61	43.11	6.17463	-41.3965	-43.945
2012-12-14 22:28:40	40.69	43.19	6.18157	-41.4781	-44.0265
2012-12-14 22:38:40	40.73	43.24	6.18852	-41.5189	-44.0775
2012-12-14 22:48:40	40.83	43.34	6.19546	-41.6208	-44.1794
2012-12-14 22:58:40	40.88	43.38	6.20241	-41.6718	-44.2202
2012-12-14 23:08:40	40.96	43.45	6.20935	-41.7533	-44.2915	2012-12-14 23:08:40
2012-12-14 23:18:40	41.05	43.54	6.2163	-41.8451	-44.3833
2012-12-14 23:28:40	41.12	43.62	6.22324	-41.9164	-44.4648
2012-12-14 23:38:40	41.18	43.69	6.23018	-41.9776	-44.5362
2012-12-14 23:48:40	41.27	43.78	6.23713	-42.0693	-44.6279
2012-12-14 23:58:40	41.34	43.85	6.24407	-42.1407	-44.6993
2012-12-15 00:08:40	41.39	43.9	6.25102	-42.1916	-44.7503	2012-12-15 00:08:40
2012-12-15 00:18:40	41.46	43.96	6.25796	-42.263	-44.8114
2012-12-15 00:28:40	41.56	44.09	6.26491	-42.3649	-44.9439
2012-12-15 00:38:40	41.59	44.11	6.27185	-42.3955	-44.9643
2012-12-15 00:48:40	41.71	44.2	6.2788	-42.5178	-45.0561
2012-12-15 00:58:40	41.76	44.26	6.28574	-42.5688	-45.1172
2012-12-15 01:08:40	41.84	44.34	6.29268	-42.6504	-45.1988	2012-12-15 01:08:40
2012-12-15 01:18:40	41.9	44.41	6.29963	-42.7115	-45.2701
2012-12-15 01:28:40	41.98	44.46	6.30657	-42.7931	-45.3211
2012-12-15 01:38:40	42.04	44.54	6.31352	-42.8542	-45.4027
2012-12-15 01:48:40	42.09	44.58	6.32046	-42.9052	-45.4434
2012-12-15 01:58:40	42.14	44.65	6.32741	-42.9562	-45.5148
2012-12-15 02:08:40	42.24	44.75	6.33435	-43.0581	-45.6167	2012-12-15 02:08:40
2012-12-15 02:18:40	42.33	44.83	6.3413	-43.1498	-45.6983
2012-12-15 02:28:40	42.4	44.91	6.34824	-43.2212	-45.7798
2012-12-15 02:38:40	42.45	44.94	6.35518	-43.2722	-45.8104
2012-12-15 02:48:40	42.48	44.99	6.36213	-43.3028	-45.8614
2012-12-15 02:58:40	42.59	45.09	6.36907	-43.4149	-45.9633
2012-12-15 03:08:40	42.67	45.17	6.37602	-43.4964	-46.0449	2012-12-15 03:08:40
2012-12-15 03:18:40	42.71	45.2	6.38296	-43.5372	-46.0754
2012-12-15 03:28:40	42.8	45.3	6.38991	-43.629	-46.1774
2012-12-15 03:38:40	42.84	45.36	6.39685	-43.6697	-46.2385
2012-12-15 03:48:40	42.91	45.41	6.4038	-43.7411	-46.2895
2012-12-15 03:58:40	43.01	45.5	6.41074	-43.843	-46.3812
2012-12-15 04:08:40	43.06	45.57	6.41768	-43.894	-46.4526	2012-12-15 04:08:40
2012-12-15 04:18:40	43.16	45.67	6.42463	-43.9959	-46.5545
2012-12-15 04:28:40	43.17	45.7	6.43157	-44.0061	-46.5851
2012-12-15 04:38:40	43.27	45.79	6.43852	-44.1081	-46.6769
2012-12-15 04:48:40	43.32	45.83	6.44546	-44.159	-46.7176
2012-12-15 04:58:40	43.38	45.88	6.45241	-44.2202	-46.7686
2012-12-15 05:08:40	43.4	45.92	6.45935	-44.2406	-46.8094	2012-12-15 05:08:40
2012-12-15 05:18:40	43.47	46	6.4663	-44.3119	-46.8909
2012-12-15 05:28:40	43.54	46.04	6.47324	-44.3833	-46.9317
2012-12-15 05:38:40	43.58	46.1	6.48018	-44.4241	-46.9929
2012-12-15 05:48:40	43.68	46.2	6.48713	-44.526	-47.0948
2012-12-15 05:58:40	43.74	46.27	6.49407	-44.5872	-47.1662
2012-12-15 06:08:40	43.8	46.31	6.50102	-44.6483	-47.2069	2012-12-15 06:08:40
2012-12-15 06:18:40	43.88	46.4	6.50796	-44.7299	-47.2987
2012-12-15 06:28:40	43.94	46.45	6.51491	-44.791	-47.3496
2012-12-15 06:38:40	43.93	46.47	6.52185	-44.7808	-47.37
2012-12-15 06:48:40	44.04	46.54	6.5288	-44.893	-47.4414
2012-12-15 06:58:40	44.1	46.62	6.53574	-44.9541	-47.5229
2012-12-15 07:08:40	44.17	46.68	6.54268	-45.0255	-47.5841	2012-12-15 07:08:40
2012-12-15 07:18:40	44.24	46.73	6.54963	-45.0968	-47.6351
2012-12-15 07:28:40	44.29	46.8	6.55657	-45.1478	-47.7064
2012-12-15 07:38:40	44.31	46.83	6.56352	-45.1682	-47.737
2012-12-15 07:48:40	44.41	46.92	6.57046	-45.2701	-47.8287
2012-12-15 07:58:40	44.46	46.97	6.57741	-45.3211	-47.8797
2012-12-15 08:08:40	44.54	47.05	6.58435	-45.4027	-47.9613	2012-12-15 08:08:40
2012-12-15 08:18:40	44.62	47.12	6.5913	-45.4842	-48.0326
2012-12-15 08:28:40	44.67	47.17	6.59824	-45.5352	-48.0836
2012-12-15 08:38:40	44.72	47.24	6.60518	-45.5861	-48.1549
2012-12-15 08:48:40	44.77	47.3	6.61213	-45.6371	-48.2161
2012-12-15 08:58:40	44.86	47.37	6.61907	-45.7288	-48.2875
2012-12-15 09:08:40	44.95	47.46	6.62602	-45.8206	-48.3792	2012-12-15 09:08:40
2012-12-15 09:18:40	45.01	47.51	6.63296	-45.8818	-48.4302
2012-12-15 09:28:40	45.08	47.59	6.63991	-45.9531	-48.5117
2012-12-15 09:38:40	45.16	47.66	6.64685	-46.0347	-48.5831
2012-12-15 09:48:40	45.22	47.71	6.6538	-46.0958	-48.634
2012-12-15 09:58:40	45.29	47.8	6.66074	-46.1672	-48.7258
2012-12-15 10:08:40	45.36	47.88	6.66768	-46.2385	-48.8073	2012-12-15 10:08:40
2012-12-15 10:18:40	45.44	47.95	6.67463	-46.3201	-48.8787
2012-12-15 10:28:40	45.5	48.02	6.68157	-46.3812	-48.9501
2012-12-15 10:38:40	45.56	48.07	6.68852	-46.4424	-49.001
2012-12-15 10:48:40	45.6	48.12	6.69546	-46.4832	-49.052
2012-12-15 10:58:40	45.68	48.2	6.70241	-46.5647	-49.1335
2012-12-15 11:08:40	45.74	48.27	6.70935	-46.6259	-49.2049	2012-12-15 11:08:40
2012-12-15 11:18:40	45.82	48.33	6.7163	-46.7074	-49.2661
2012-12-15 11:28:40	45.89	48.4	6.72324	-46.7788	-49.3374
2012-12-15 11:38:40	45.9	48.42	6.73018	-46.789	-49.3578
2012-12-15 11:48:40	45.76	48.3	6.73713	-46.6463	-49.2355
2012-12-15 11:58:40	45.92	48.46	6.74407	-46.8094	-49.3986
2012-12-15 12:08:40	46.01	48.55	6.75102	-46.9011	-49.4903	2012-12-15 12:08:40
2012-12-15 12:18:40	46.07	48.63	6.75796	-46.9623	-49.5719
2012-12-15 12:28:40	46.15	48.71	6.76491	-47.0438	-49.6534
2012-12-15 12:38:40	46.22	48.75	6.77185	-47.1152	-49.6942
2012-12-15 12:48:40	46.28	48.84	6.7788	-47.1764	-49.7859
2012-12-15 12:58:40	46.35	48.91	6.78574	-47.2477	-49.8573
2012-12-15 13:08:40	46.44	48.99	6.79268	-47.3394	-49.9388	2012-12-15 13:08:40
2012-12-15 13:18:40	46.48	48.98	6.79963	-47.3802	-49.9286
2012-12-15 13:28:40	46.56	49.1	6.80657	-47.4618	-50.051
2012-12-15 13:38:40	46.64	49.19	6.81352	-47.5433	-50.1427
2012-12-15 13:48:40	46.69	49.24	6.82046	-47.5943	-50.1937
2012-12-15 13:58:40	46.8	49.34	6.82741	-47.7064	-50.2956
2012-12-15 14:08:40	46.85	49.39	6.83435	-47.7574	-50.3466	2012-12-15 14:08:40
2012-12-15 14:18:40	46.94	49.48	6.8413	-47.8491	-50.4383
2012-12-15 14:28:40	47.03	49.57	6.84824	-47.9409	-50.5301
2012-12-15 14:38:40	47.11	49.64	6.85518	-48.0224	-50.6014
2012-12-15 14:48:40	47.17	49.72	6.86213	-48.0836	-50.683
2012-12-15 14:58:40	47.25	49.79	6.86907	-48.1651	-50.7543
2012-12-15 15:08:40	47.32	49.87	6.87602	-48.2365	-50.8359	2012-12-15 15:08:40
2012-12-15 15:18:40	47.41	49.95	6.88296	-48.3282	-50.9174
2012-12-15 15:28:40	47.5	50.03	6.88991	-48.42	-50.999
2012-12-15 15:38:40	47.55	50.09	6.89685	-48.4709	-51.0601
2012-12-15 15:48:40	47.62	50.15	6.9038	-48.5423	-51.1213
2012-12-15 15:58:40	47.68	50.24	6.91074	-48.6035	-51.213
2012-12-15 16:08:40	47.75	50.31	6.91768	-48.6748	-51.2844	2012-12-15 16:08:40
2012-12-15 16:18:40	47.82	50.38	6.92463	-48.7462	-51.3558
2012-12-15 16:28:40	47.9	50.43	6.93157	-48.8277	-51.4067
2012-12-15 16:38:40	47.96	50.52	6.93852	-48.8889	-51.4985
2012-12-15 16:48:40	48.06	50.61	6.94546	-48.9908	-51.5902
2012-12-15 16:58:40	48.14	50.7	6.95241	-49.0724	-51.682
2012-12-15 17:08:40	48.22	50.77	6.95935	-49.1539	-51.7533	2012-12-15 17:08:40
2012-12-15 17:18:40	48.32	50.86	6.9663	-49.2559	-51.8451
2012-12-15 17:28:40	48.39	50.95	6.97324	-49.3272	-51.9368
2012-12-15 17:38:40	48.47	51.01	6.98018	-49.4088	-51.998
2012-12-15 17:48:40	48.51	51.06	6.98713	-49.4495	-52.0489
2012-12-15 17:58:40	48.57	51.13	6.99407	-49.5107	-52.1203
2012-12-15 18:08:40	48.67	51.23	7.00102	-49.6126	-52.2222	2012-12-15 18:08:40
2012-12-15 18:18:40	48.75	51.29	7.00796	-49.6942	-52.2834
2012-12-15 18:28:40	48.83	51.38	7.01491	-49.7757	-52.3751
2012-12-15 18:38:40	48.94	51.5	7.02185	-49.8879	-52.4975
2012-12-15 18:48:40	49	51.56	7.0288	-49.949	-52.5586
2012-12-15 18:58:40	49.1	51.64	7.03574	-50.051	-52.6402
2012-12-15 19:08:40	49.17	51.72	7.04268	-50.1223	-52.7217	2012-12-15 19:08:40
2012-12-15 19:18:40	49.28	51.84	7.04963	-50.2345	-52.844
2012-12-15 19:28:40	49.37	51.92	7.05657	-50.3262	-52.9256
2012-12-15 19:38:40	49.44	52	7.06352	-50.3976	-53.0071
2012-12-15 19:48:40	49.53	52.08	7.07046	-50.4893	-53.0887
2012-12-15 19:58:40	49.62	52.17	7.07741	-50.581	-53.1804
2012-12-15 20:08:40	49.72	52.27	7.08435	-50.683	-53.2824	2012-12-15 20:08:40
2012-12-15 20:18:40	49.83	52.38	7.0913	-50.7951	-53.3945
2012-12-15 20:28:40	49.9	52.46	7.09824	-50.8665	-53.476
2012-12-15 20:38:40	49.98	52.53	7.10518	-50.948	-53.5474
2012-12-15 20:48:40	50.06	52.62	7.11213	-51.0296	-53.6391
2012-12-15 20:58:40	50.16	52.71	7.11907	-51.1315	-53.7309
2012-12-15 21:08:40	50.25	52.8	7.12602	-51.2232	-53.8226	2012-12-15 21:08:40
2012-12-15 21:18:40	50.34	52.89	7.13296	-51.315	-53.9144
2012-12-15 21:28:40	50.41	52.98	7.13991	-51.3863	-54.0061
2012-12-15 21:38:40	50.5	53.06	7.14685	-51.4781	-54.0877
2012-12-15 21:48:40	50.59	53.14	7.1538	-51.5698	-54.1692
2012-12-15 21:58:40	50.68	53.22	7.16074	-51.6616	-54.2508
2012-12-15 22:08:40	50.72	53.31	7.16768	-51.7023	-54.3425	2012-12-15 22:08:40
2012-12-15 22:18:40	50.86	53.41	7.17463	-51.8451	-54.4444
2012-12-15 22:28:40	50.97	53.53	7.18157	-51.9572	-54.5668
2012-12-15 22:38:40	51.07	53.62	7.18852	-52.0591	-54.6585
2012-12-15 22:48:40	51.16	53.7	7.19546	-52.1509	-54.7401
2012-12-15 22:58:40	51.24	53.8	7.20241	-52.2324	-54.842
2012-12-15 23:08:40	51.3	53.86	7.20935	-52.2936	-54.9032	2012-12-15 23:08:40
2012-12-15 23:18:40	51.39	53.94	7.2163	-52.3853	-54.9847
2012-12-15 23:28:40	51.51	54.06	7.22324	-52.5076	-55.107
2012-12-15 23:38:40	51.59	54.14	7.23018	-52.5892	-55.1886
2012-12-15 23:48:40	51.67	54.23	7.23713	-52.6707	-55.2803
2012-12-15 23:58:40	51.78	54.32	7.24407	-52.7829	-55.3721
2012-12-16 00:08:40	51.87	54.44	7.25102	-52.8746	-55.4944	2012-12-16 00:08:40
2012-12-16 00:18:40	51.96	54.52	7.25796	-52.9664	-55.5759
2012-12-16 00:28:40	52.06	54.62	7.26491	-53.0683	-55.6779
2012-12-16 00:38:40	52.15	54.71	7.27185	-53.16	-55.7696
2012-12-16 00:48:40	52.27	54.82	7.2788	-53.2824	-55.8818
2012-12-16 00:58:40	52.34	54.91	7.28574	-53.3537	-55.9735
2012-12-16 01:08:40	52.44	55.01	7.29268	-53.4557	-56.0754	2012-12-16 01:08:40
2012-12-16 01:18:40	52.52	55.08	7.29963	-53.5372	-56.1468
2012-12-16 01:28:40	52.63	55.19	7.30657	-53.6493	-56.2589
2012-12-16 01:38:40	52.7	55.27	7.31352	-53.7207	-56.3405
2012-12-16 01:48:40	52.82	55.38	7.32046	-53.843	-56.4526
2012-12-16 01:58:40	52.94	55.5	7.32741	-53.9653	-56.5749
2012-12-16 02:08:40	53	55.56	7.33435	-54.0265	-56.6361	2012-12-16 02:08:40
2012-12-16 02:18:40	53.1	55.67	7.3413	-54.1284	-56.7482
2012-12-16 02:28:40	53.17	55.77	7.34824	-54.1998	-56.8502
2012-12-16 02:38:40	53.32	55.86	7.35518	-54.3527	-56.9419
2012-12-16 02:48:40	53.39	55.95	7.36213	-54.4241	-57.0336
2012-12-16 02:58:40	53.5	56.07	7.36907	-54.5362	-57.156
2012-12-16 03:08:40	53.61	56.16	7.37602	-54.6483	-57.2477	2012-12-16 03:08:40
2012-12-16 03:18:40	53.69	56.25	7.38296	-54.7299	-57.3394
2012-12-16 03:28:40	53.8	56.36	7.38991	-54.842	-57.4516
2012-12-16 03:38:40	53.93	56.48	7.39685	-54.9745	-57.5739
2012-12-16 03:48:40	54.01	56.57	7.4038	-55.0561	-57.6656
2012-12-16 03:58:40	54.12	56.68	7.41074	-55.1682	-57.7778
2012-12-16 04:08:40	54.21	56.78	7.41768	-55.2599	-57.8797	2012-12-16 04:08:40
2012-12-16 04:18:40	54.31	56.86	7.42463	-55.3619	-57.9613
2012-12-16 04:28:40	54.41	56.98	7.43157	-55.4638	-58.0836
2012-12-16 04:38:40	54.5	57.08	7.43852	-55.5556	-58.1855
2012-12-16 04:48:40	54.63	57.19	7.44546	-55.6881	-58.2977
2012-12-16 04:58:40	54.72	57.29	7.45241	-55.7798	-58.3996
2012-12-16 05:08:40	54.83	57.4	7.45935	-55.8919	-58.5117	2012-12-16 05:08:40
2012-12-16 05:18:40	54.95	57.49	7.4663	-56.0143	-58.6035
2012-12-16 05:28:40	55.04	57.62	7.47324	-56.106	-58.736
2012-12-16 05:38:40	55.11	57.69	7.48018	-56.1774	-58.8073
2012-12-16 05:48:40	55.25	57.8	7.48713	-56.3201	-58.9195
2012-12-16 05:58:40	55.36	57.93	7.49407	-56.4322	-59.052
2012-12-16 06:08:40	55.47	58.04	7.50102	-56.5443	-59.1641	2012-12-16 06:08:40
2012-12-16 06:18:40	55.58	58.15	7.50796	-56.6565	-59.2762
2012-12-16 06:28:40	55.7	58.27	7.51491	-56.7788	-59.3986
2012-12-16 06:38:40	55.82	58.4	7.52185	-56.9011	-59.5311
2012-12-16 06:48:40	55.94	58.51	7.5288	-57.0234	-59.6432
2012-12-16 06:58:40	56.07	58.64	7.53574	-57.156	-59.7757
2012-12-16 07:08:40	56.18	58.74	7.54268	-57.2681	-59.8777	2012-12-16 07:08:40
2012-12-16 07:18:40	56.29	58.86	7.54963	-57.3802	-60
2012-12-16 07:28:40	56.36	58.93	7.55657	-57.4516	-60.0714
2012-12-16 07:38:40	56.42	58.99	7.56352	-57.5127	-60.1325
2012-12-16 07:48:40	56.55	59.11	7.57046	-57.6453	-60.2548
2012-12-16 07:58:40	56.66	59.23	7.57741	-57.7574	-60.3772
2012-12-16 08:08:40	56.75	59.31	7.58435	-57.8491	-60.4587	2012-12-16 08:08:40
2012-12-16 08:18:40	56.85	59.43	7.5913	-57.9511	-60.581
2012-12-16 08:28:40	56.92	59.5	7.59824	-58.0224	-60.6524
2012-12-16 08:38:40	57.03	59.6	7.60518	-58.1346	-60.7543
2012-12-16 08:48:40	57.13	59.7	7.61213	-58.2365	-60.8563
2012-12-16 08:58:40	57.21	59.77	7.61907	-58.318	-60.9276
2012-12-16 09:08:40	57.33	59.9	7.62602	-58.4404	-61.0601	2012-12-16 09:08:40
2012-12-16 09:18:40	57.42	59.99	7.63296	-58.5321	-61.1519
2012-12-16 09:28:40	57.55	60.09	7.63991	-58.6646	-61.2538
2012-12-16 09:38:40	57.64	60.21	7.64685	-58.7564	-61.3761
2012-12-16 09:48:40	57.73	60.3	7.6538	-58.8481	-61.4679
2012-12-16 09:58:40	57.85	60.42	7.66074	-58.9704	-61.5902
2012-12-16 10:08:40	57.94	60.52	7.66768	-59.0622	-61.6922	2012-12-16 10:08:40
2012-12-16 10:18:40	58.05	60.63	7.67463	-59.1743	-61.8043
2012-12-16 10:28:40	58.17	60.76	7.68157	-59.2966	-61.9368
2012-12-16 10:38:40	58.29	60.87	7.68852	-59.419	-62.0489
2012-12-16 10:48:40	58.43	61.01	7.69546	-59.5617	-62.1916
2012-12-16 10:58:40	58.54	61.12	7.70241	-59.6738	-62.3038
2012-12-16 11:08:40	58.63	61.23	7.70935	-59.7655	-62.4159	2012-12-16 11:08:40
2012-12-16 11:18:40	58.77	61.34	7.7163	-59.9083	-62.528
2012-12-16 11:28:40	58.87	61.44	7.72324	-60.0102	-62.63
2012-12-16 11:38:40	58.95	61.53	7.73018	-60.0917	-62.7217
2012-12-16 11:48:40	59.09	61.67	7.73713	-60.2345	-62.8644
2012-12-16 11:58:40	59.17	61.77	7.74407	-60.316	-62.9664
2012-12-16 12:08:40	59.31	61.89	7.75102	-60.4587	-63.0887	2012-12-16 12:08:40
2012-12-16 12:18:40	59.41	61.99	7.75796	-60.5607	-63.1906
2012-12-16 12:28:40	59.52	62.1	7.76491	-60.6728	-63.3028
2012-12-16 12:38:40	59.65	62.22	7.77185	-60.8053	-63.4251
2012-12-16 12:48:40	59.73	62.28	7.7788	-60.8869	-63.4862
2012-12-16 12:58:40	59.84	62.42	7.78574	-60.999	-63.629
2012-12-16 13:08:40	59.96	62.54	7.79268	-61.1213	-63.7513	2012-12-16 13:08:40
2012-12-16 13:18:40	60.08	62.67	7.79963	-61.2436	-63.8838
2012-12-16 13:28:40	60.19	62.77	7.80657	-61.3558	-63.9857
2012-12-16 13:38:40	60.32	62.89	7.81352	-61.4883	-64.1081
2012-12-16 13:48:40	60.44	63.01	7.82046	-61.6106	-64.2304
2012-12-16 13:58:40	60.53	63.12	7.82741	-61.7023	-64.3425
2012-12-16 14:08:40	60.64	63.21	7.83435	-61.8145	-64.4343	2012-12-16 14:08:40
2012-12-16 14:18:40	60.75	63.34	7.8413	-61.9266	-64.5668
2012-12-16 14:28:40	60.89	63.47	7.84824	-62.0693	-64.6993
2012-12-16 14:38:40	60.63	63.11	7.85518	-61.8043	-64.3323
2012-12-16 14:48:40	61.03	63.62	7.86213	-62.212	-64.8522
2012-12-16 14:58:40	61.17	63.77	7.86907	-62.3547	-65.0051
2012-12-16 15:08:40	61.28	63.87	7.87602	-62.4669	-65.107	2012-12-16 15:08:40
2012-12-16 15:18:40	61.41	63.98	7.88296	-62.5994	-65.2192
2012-12-16 15:28:40	61.55	64.13	7.88991	-62.7421	-65.3721
2012-12-16 15:38:40	61.66	64.25	7.89685	-62.8542	-65.4944
2012-12-16 15:48:40	61.77	64.35	7.9038	-62.9664	-65.5963
2012-12-16 15:58:40	61.91	64.48	7.91074	-63.1091	-65.7288
2012-12-16 16:08:40	62.04	64.62	7.91768	-63.2416	-65.8716	2012-12-16 16:08:40
2012-12-16 16:18:40	62.14	64.72	7.92463	-63.3435	-65.9735
2012-12-16 16:28:40	62.26	64.85	7.93157	-63.4659	-66.106
2012-12-16 16:38:40	62.4	65	7.93852	-63.6086	-66.2589
2012-12-16 16:48:40	62.51	65.13	7.94546	-63.7207	-66.3914
2012-12-16 16:58:40	62.65	65.25	7.95241	-63.8634	-66.5138
2012-12-16 17:08:40	62.8	65.39	7.95935	-64.0163	-66.6565	2012-12-16 17:08:40
2012-12-16 17:18:40	62.92	65.51	7.9663	-64.1386	-66.7788
2012-12-16 17:28:40	63.03	65.63	7.97324	-64.2508	-66.9011
2012-12-16 17:38:40	63.18	65.77	7.98018	-64.4037	-67.0438
2012-12-16 17:48:40	63.28	65.86	7.98713	-64.5056	-67.1356
2012-12-16 17:58:40	63.41	66	7.99407	-64.6381	-67.2783
2012-12-16 18:08:40	63.55	66.16	8.00102	-64.7808	-67.4414	2012-12-16 18:08:40
2012-12-16 18:18:40	63.67	66.26	8.00796	-64.9032	-67.5433
2012-12-16 18:28:40	63.83	66.42	8.01491	-65.0663	-67.7064
2012-12-16 18:38:40	63.95	66.54	8.02185	-65.1886	-67.8287
2012-12-16 18:48:40	64.08	66.69	8.0288	-65.3211	-67.9817
2012-12-16 18:58:40	64.23	66.82	8.03574	-65.474	-68.1142
2012-12-16 19:08:40	64.36	66.95	8.04268	-65.6065	-68.2467	2012-12-16 19:08:40
2012-12-16 19:18:40	64.48	67.09	8.04963	-65.7288	-68.3894
2012-12-16 19:28:40	64.6	67.2	8.05657	-65.8512	-68.5015
2012-12-16 19:38:40	64.74	67.28	8.06352	-65.9939	-68.5831
2012-12-16 19:48:40	64.9	67.51	8.07046	-66.157	-68.8175
2012-12-16 19:58:40	65.02	67.62	8.07741	-66.2793	-68.9297
2012-12-16 20:08:40	65.16	67.77	8.08435	-66.422	-69.0826	2012-12-16 20:08:40
2012-12-16 20:18:40	65.3	67.9	8.0913	-66.5647	-69.2151
2012-12-16 20:28:40	65.43	68.03	8.09824	-66.6972	-69.3476
2012-12-16 20:38:40	65.53	68.18	8.10518	-66.7992	-69.5005
2012-12-16 20:48:40	65.74	68.34	8.11213	-67.0133	-69.6636
2012-12-16 20:58:40	65.88	68.48	8.11907	-67.156	-69.8063
2012-12-16 21:08:40	65.97	68.58	8.12602	-67.2477	-69.9083	2012-12-16 21:08:40
2012-12-16 21:18:40	66.1	68.67	8.13296	-67.3802	-70
2012-12-16 21:28:40	66.22	68.82	8.13991	-67.5025	-70.1529
2012-12-16 21:38:40	66.36	68.97	8.14685	-67.6453	-70.3058
2012-12-16 21:48:40	66.52	69.13	8.1538	-67.8084	-70.4689
2012-12-16 21:58:40	66.66	69.27	8.16074	-67.9511	-70.6116
2012-12-16 22:08:40	66.82	69.41	8.16768	-68.1142	-70.7543	2012-12-16 22:08:40
2012-12-16 22:18:40	66.96	69.57	8.17463	-68.2569	-70.9174
2012-12-16 22:28:40	67.05	69.68	8.18157	-68.3486	-71.0296
2012-12-16 22:38:40	67.27	69.87	8.18852	-68.5729	-71.2232
2012-12-16 22:48:40	67.38	69.95	8.19546	-68.685	-71.3048
2012-12-16 22:58:40	67.53	70.12	8.20241	-68.8379	-71.4781
2012-12-16 23:08:40	67.67	70.28	8.20935	-68.9806	-71.6412	2012-12-16 23:08:40
2012-12-16 23:18:40	67.8	70.41	8.2163	-69.1131	-71.7737
2012-12-16 23:28:40	67.94	70.55	8.22324	-69.2559	-71.9164
2012-12-16 23:38:40	68.1	70.71	8.23018	-69.419	-72.0795
2012-12-16 23:48:40	68.23	70.85	8.23713	-69.5515	-72.2222
2012-12-16 23:58:40	68.37	70.98	8.24407	-69.6942	-72.3547
2012-12-17 00:08:40	68.54	71.16	8.25102	-69.8675	-72.5382	2012-12-17 00:08:40
2012-12-17 00:18:40	68.69	71.31	8.25796	-70.0204	-72.6911
2012-12-17 00:28:40	68.85	71.45	8.26491	-70.1835	-72.8338
2012-12-17 00:38:40	68.99	71.6	8.27185	-70.3262	-72.9867
2012-12-17 00:48:40	69.16	71.75	8.2788	-70.4995	-73.1397
2012-12-17 00:58:40	69.28	71.87	8.28574	-70.6218	-73.262
2012-12-17 01:08:40	69.41	72.03	8.29268	-70.7543	-73.4251	2012-12-17 01:08:40
2012-12-17 01:18:40	69.58	72.18	8.29963	-70.9276	-73.578
2012-12-17 01:28:40	69.73	72.33	8.30657	-71.0805	-73.7309
2012-12-17 01:38:40	69.89	72.47	8.31352	-71.2436	-73.8736
2012-12-17 01:48:40	70.04	72.63	8.32046	-71.3965	-74.0367
2012-12-17 01:58:40	70.15	72.77	8.32741	-71.5087	-74.1794
2012-12-17 02:08:40	70.33	72.95	8.33435	-71.6922	-74.3629	2012-12-17 02:08:40
2012-12-17 02:18:40	70.48	73.1	8.3413	-71.8451	-74.5158
2012-12-17 02:28:40	70.63	73.24	8.34824	-71.998	-74.6585
2012-12-17 02:38:40	70.78	73.4	8.35518	-72.1509	-74.8216
2012-12-17 02:48:40	70.94	73.54	8.36213	-72.314	-74.9643
2012-12-17 02:58:40	71.05	73.66	8.36907	-72.4261	-75.0866
2012-12-17 03:08:40	71.24	73.84	8.37602	-72.6198	-75.2701	2012-12-17 03:08:40
2012-12-17 03:18:40	71.37	74	8.38296	-72.7523	-75.4332
2012-12-17 03:28:40	71.53	74.16	8.38991	-72.9154	-75.5963
2012-12-17 03:38:40	71.68	74.3	8.39685	-73.0683	-75.739
2012-12-17 03:48:40	71.86	74.48	8.4038	-73.2518	-75.9225
2012-12-17 03:58:40	72	74.64	8.41074	-73.3945	-76.0856
2012-12-17 04:08:40	72.12	74.74	8.41768	-73.5168	-76.1876	2012-12-17 04:08:40
2012-12-17 04:18:40	72.28	74.91	8.42463	-73.6799	-76.3609
2012-12-17 04:28:40	72.43	75.04	8.43157	-73.8328	-76.4934
2012-12-17 04:38:40	72.58	75.21	8.43852	-73.9857	-76.6667
2012-12-17 04:48:40	72.73	75.34	8.44546	-74.1386	-76.7992
2012-12-17 04:58:40	72.87	75.49	8.45241	-74.2813	-76.9521
2012-12-17 05:08:40	72.96	75.59	8.45935	-74.3731	-77.054	2012-12-17 05:08:40
2012-12-17 05:18:40	73.09	75.71	8.4663	-74.5056	-77.1764
2012-12-17 05:28:40	73.25	75.88	8.47324	-74.6687	-77.3496
2012-12-17 05:38:40	73.34	75.94	8.48018	-74.7604	-77.4108
2012-12-17 05:48:40	73.48	76.11	8.48713	-74.9032	-77.5841
2012-12-17 05:58:40	73.63	76.27	8.49407	-75.0561	-77.7472
2012-12-17 06:08:40	73.77	76.41	8.50102	-75.1988	-77.8899	2012-12-17 06:08:40
2012-12-17 06:18:40	73.94	76.58	8.50796	-75.3721	-78.0632
2012-12-17 06:28:40	74.1	76.74	8.51491	-75.5352	-78.2263
2012-12-17 06:38:40	74.23	76.86	8.52185	-75.6677	-78.3486
2012-12-17 06:48:40	74.41	77.04	8.5288	-75.8512	-78.5321
2012-12-17 06:58:40	74.53	77.15	8.53574	-75.9735	-78.6442
2012-12-17 07:08:40	74.68	77.33	8.54268	-76.1264	-78.8277	2012-12-17 07:08:40
2012-12-17 07:18:40	74.86	77.5	8.54963	-76.3099	-79.001
2012-12-17 07:28:40	75.02	77.65	8.55657	-76.473	-79.1539
2012-12-17 07:38:40	75.14	77.77	8.56352	-76.5953	-79.2762
2012-12-17 07:48:40	75.32	77.94	8.57046	-76.7788	-79.4495
2012-12-17 07:58:40	75.42	78.05	8.57741	-76.8807	-79.5617
2012-12-17 08:08:40	75.6	78.23	8.58435	-77.0642	-79.7452	2012-12-17 08:08:40
2012-12-17 08:18:40	75.75	78.39	8.5913	-77.2171	-79.9083
2012-12-17 08:28:40	75.9	78.54	8.59824	-77.37	-80.0612
2012-12-17 08:38:40	76.04	78.67	8.60518	-77.5127	-80.1937
2012-12-17 08:48:40	76.18	78.82	8.61213	-77.6555	-80.3466
2012-12-17 08:58:40	76.38	79	8.61907	-77.8593	-80.5301
2012-12-17 09:08:40	76.2	78.8	8.62602	-77.6758	-80.3262	2012-12-17 09:08:40
2012-12-17 09:18:40	76.48	79.09	8.63296	-77.9613	-80.6218
2012-12-17 09:28:40	76.67	79.27	8.63991	-78.1549	-80.8053
2012-12-17 09:38:40	76.79	79.39	8.64685	-78.2773	-80.9276
2012-12-17 09:48:40	77.01	79.59	8.6538	-78.5015	-81.1315
2012-12-17 09:58:40	77.13	79.77	8.66074	-78.6239	-81.315
2012-12-17 10:08:40	77.32	79.91	8.66768	-78.8175	-81.4577	2012-12-17 10:08:40
2012-12-17 10:18:40	77.47	80.08	8.67463	-78.9704	-81.631
2012-12-17 10:28:40	77.31	79.98	8.68157	-78.8073	-81.5291
2012-12-17 10:38:40	77.75	80.42	8.68852	-79.2559	-81.9776
2012-12-17 10:48:40	78.02	80.7	8.69546	-79.5311	-82.263
2012-12-17 10:58:40	78.29	80.96	8.70241	-79.8063	-82.528
2012-12-17 11:08:40	78.54	81.21	8.70935	-80.0612	-82.7829	2012-12-17 11:08:40
2012-12-17 11:18:40	78.79	81.45	8.7163	-80.316	-83.0275
2012-12-17 11:28:40	78.92	81.54	8.72324	-80.4485	-83.1193
2012-12-17 11:38:40	79.1	81.72	8.73018	-80.632	-83.3028
2012-12-17 11:48:40	79.28	81.89	8.73713	-80.8155	-83.476
2012-12-17 11:58:40	79.43	82.06	8.74407	-80.9684	-83.6493
2012-12-17 12:08:40	79.66	82.27	8.75102	-81.2029	-83.8634	2012-12-17 12:08:40
2012-12-17 12:18:40	79.83	82.44	8.75796	-81.3761	-84.0367
2012-12-17 12:28:40	79.97	82.57	8.76491	-81.5189	-84.1692
2012-12-17 12:38:40	80.16	82.79	8.77185	-81.7125	-84.3935
2012-12-17 12:48:40	80.36	82.97	8.7788	-81.9164	-84.577
2012-12-17 12:58:40	80.54	83.14	8.78574	-82.0999	-84.7503
2012-12-17 13:08:40	80.69	83.31	8.79268	-82.2528	-84.9235	2012-12-17 13:08:40
2012-12-17 13:18:40	80.9	83.5	8.79963	-82.4669	-85.1172
2012-12-17 13:28:40	81.02	83.63	8.80657	-82.5892	-85.2497
2012-12-17 13:38:40	81.13	83.77	8.81352	-82.7013	-85.3925
2012-12-17 13:48:40	81.33	83.94	8.82046	-82.9052	-85.5657
2012-12-17 13:58:40	81.52	84.15	8.82741	-83.0989	-85.7798
2012-12-17 14:08:40	81.74	84.36	8.83435	-83.3231	-85.9939	2012-12-17 14:08:40
2012-12-17 14:18:40	81.92	84.51	8.8413	-83.5066	-86.1468
2012-12-17 14:28:40	82.09	84.72	8.84824	-83.6799	-86.3609
2012-12-17 14:38:40	82.28	84.89	8.85518	-83.8736	-86.5341
2012-12-17 14:48:40	82.39	85	8.86213	-83.9857	-86.6463
2012-12-17 14:58:40	82.52	85.14	8.86907	-84.1182	-86.789
2012-12-17 15:08:40	82.7	85.33	8.87602	-84.3017	-86.9827	2012-12-17 15:08:40
2012-12-17 15:18:40	82.94	85.55	8.88296	-84.5464	-87.2069
2012-12-17 15:28:40	83.06	85.76	8.88991	-84.6687	-87.421
2012-12-17 15:38:40	83.32	85.93	8.89685	-84.9337	-87.5943
2012-12-17 15:48:40	83.49	86.1	8.9038	-85.107	-87.7676
2012-12-17 15:58:40	83.69	86.32	8.91074	-85.3109	-87.9918
2012-12-17 16:08:40	83.89	86.48	8.91768	-85.5148	-88.1549	2012-12-17 16:08:40
2012-12-17 16:18:40	84.07	86.69	8.92463	-85.6983	-88.369
2012-12-17 16:28:40	84.28	86.89	8.93157	-85.9123	-88.5729
2012-12-17 16:38:40	84.45	87.07	8.93852	-86.0856	-88.7564
2012-12-17 16:48:40	84.64	87.26	8.94546	-86.2793	-88.9501
2012-12-17 16:58:40	84.82	87.44	8.95241	-86.4628	-89.1335
2012-12-17 17:08:40	84.96	87.58	8.95935	-86.6055	-89.2762	2012-12-17 17:08:40
2012-12-17 17:18:40	85.15	87.8	8.9663	-86.7992	-89.5005
2012-12-17 17:28:40	85.34	87.97	8.97324	-86.9929	-89.6738
2012-12-17 17:38:40	85.5	88.11	8.98018	-87.156	-89.8165
2012-12-17 17:48:40	85.67	88.3	8.98713	-87.3293	-90.0102
2012-12-17 17:58:40	85.86	88.49	8.99407	-87.5229	-90.2039
2012-12-17 18:08:40	86.04	88.68	9.00102	-87.7064	-90.3976	2012-12-17 18:08:40
2012-12-17 18:18:40	86.21	88.86	9.00796	-87.8797	-90.581
2012-12-17 18:28:40	86.41	89.02	9.01491	-88.0836	-90.7441
2012-12-17 18:38:40	86.62	89.22	9.02185	-88.2977	-90.948
2012-12-17 18:48:40	86.79	89.39	9.0288	-88.4709	-91.1213
2012-12-17 18:58:40	86.96	89.58	9.03574	-88.6442	-91.315
2012-12-17 19:08:40	87.14	89.77	9.04268	-88.8277	-91.5087	2012-12-17 19:08:40
2012-12-17 19:18:40	87.37	90	9.04963	-89.0622	-91.7431
2012-12-17 19:28:40	87.53	90.16	9.05657	-89.2253	-91.9062
2012-12-17 19:38:40	87.73	90.37	9.06352	-89.4292	-92.1203
2012-12-17 19:48:40	87.93	90.57	9.07046	-89.633	-92.3242
2012-12-17 19:58:40	88.13	90.77	9.07741	-89.8369	-92.528
2012-12-17 20:08:40	88.36	90.99	9.08435	-90.0714	-92.7523	2012-12-17 20:08:40
2012-12-17 20:18:40	88.55	91.19	9.0913	-90.265	-92.9562
2012-12-17 20:28:40	88.73	91.38	9.09824	-90.4485	-93.1498
2012-12-17 20:38:40	88.95	91.58	9.10518	-90.6728	-93.3537
2012-12-17 20:48:40	89.13	91.78	9.11213	-90.8563	-93.5576
2012-12-17 20:58:40	89.33	91.93	9.11907	-91.0601	-93.7105
2012-12-17 21:08:40	89.54	92.18	9.12602	-91.2742	-93.9653	2012-12-17 21:08:40
2012-12-17 21:18:40	89.76	92.38	9.13296	-91.4985	-94.1692
2012-12-17 21:28:40	89.94	92.58	9.13991	-91.682	-94.3731
2012-12-17 21:38:40	90.13	92.77	9.14685	-91.8756	-94.5668
2012-12-17 21:48:40	90.3	92.94	9.1538	-92.0489	-94.7401
2012-12-17 21:58:40	90.51	93.16	9.16074	-92.263	-94.9643
2012-12-17 22:08:40	90.71	93.37	9.16768	-92.4669	-95.1784	2012-12-17 22:08:40
2012-12-17 22:18:40	90.91	93.56	9.17463	-92.6707	-95.3721
2012-12-17 22:28:40	91.1	93.76	9.18157	-92.8644	-95.5759
2012-12-17 22:38:40	91.32	93.97	9.18852	-93.0887	-95.79
2012-12-17 22:48:40	91.54	94.17	9.19546	-93.3129	-95.9939
2012-12-17 22:58:40	91.7	94.36	9.20241	-93.476	-96.1876
2012-12-17 23:08:40	91.89	94.55	9.20935	-93.6697	-96.3812	2012-12-17 23:08:40
2012-12-17 23:18:40	92.11	94.77	9.2163	-93.894	-96.6055
2012-12-17 23:28:40	92.33	94.96	9.22324	-94.1182	-96.7992
2012-12-17 23:38:40	92.53	95.19	9.23018	-94.3221	-97.0336
2012-12-17 23:48:40	92.77	95.42	9.23713	-94.5668	-97.2681
2012-12-17 23:58:40	92.94	95.6	9.24407	-94.7401	-97.4516
2012-12-18 00:08:40	93.14	95.8	9.25102	-94.9439	-97.6555	2012-12-18 00:08:40
2012-12-18 00:18:40	93.35	96.02	9.25796	-95.158	-97.8797
2012-12-18 00:28:40	93.57	96.24	9.26491	-95.3823	-98.104
2012-12-18 00:38:40	93.8	96.42	9.27185	-95.6167	-98.2875
2012-12-18 00:48:40	94.01	96.67	9.2788	-95.8308	-98.5423
2012-12-18 00:58:40	94.22	96.88	9.28574	-96.0449	-98.7564
2012-12-18 01:08:40	94.42	97.08	9.29268	-96.2487	-98.9602	2012-12-18 01:08:40
2012-12-18 01:18:40	94.61	97.27	9.29963	-96.4424	-99.1539
2012-12-18 01:28:40	94.8	97.49	9.30657	-96.6361	-99.3782
2012-12-18 01:38:40	95.04	97.71	9.31352	-96.8807	-99.6024
2012-12-18 01:48:40	95.26	97.92	9.32046	-97.105	-99.8165
2012-12-18 01:58:40	95.47	98.11	9.32741	-97.3191	-100.01
2012-12-18 02:08:40	95.67	98.35	9.33435	-97.5229	-100.255	2012-12-18 02:08:40
2012-12-18 02:18:40	95.87	98.57	9.3413	-97.7268	-100.479
2012-12-18 02:28:40	96.11	98.79	9.34824	-97.9715	-100.703
2012-12-18 02:38:40	96.35	99.04	9.35518	-98.2161	-100.958
2012-12-18 02:48:40	96.53	99.2	9.36213	-98.3996	-101.121
2012-12-18 02:58:40	96.76	99.43	9.36907	-98.634	-101.356
2012-12-18 03:08:40	96.98	99.66	9.37602	-98.8583	-101.59	2012-12-18 03:08:40
2012-12-18 03:18:40	97.19	99.87	9.38296	-99.0724	-101.804
2012-12-18 03:28:40	97.41	100.09	9.38991	-99.2966	-102.029
2012-12-18 03:38:40	97.61	100.3	9.39685	-99.5005	-102.243
2012-12-18 03:48:40	97.82	100.51	9.4038	-99.7146	-102.457
2012-12-18 03:58:40	98.04	100.72	9.41074	-99.9388	-102.671
2012-12-18 04:08:40	98.24	100.93	9.41768	-100.143	-102.885	2012-12-18 04:08:40
2012-12-18 04:18:40	98.46	101.13	9.42463	-100.367	-103.089
2012-12-18 04:28:40	98.66	101.33	9.43157	-100.571	-103.293
2012-12-18 04:38:40	98.87	101.54	9.43852	-100.785	-103.507
2012-12-18 04:48:40	99.08	101.75	9.44546	-100.999	-103.721
2012-12-18 04:58:40	99.31	101.99	9.45241	-101.233	-103.965
2012-12-18 05:08:40	99.5	102.19	9.45935	-101.427	-104.169	2012-12-18 05:08:40
2012-12-18 05:18:40	99.74	102.43	9.4663	-101.672	-104.414
2012-12-18 05:28:40	99.92	102.62	9.47324	-101.855	-104.608
2012-12-18 05:38:40	100.16	102.86	9.48018	-102.1	-104.852
2012-12-18 05:48:40	100.39	103.1	9.48713	-102.334	-105.097
2012-12-18 05:58:40	100.61	103.28	9.49407	-102.559	-105.28
2012-12-18 06:08:40	100.81	103.48	9.50102	-102.762	-105.484	2012-12-18 06:08:40
2012-12-18 06:18:40	101.03	103.71	9.50796	-102.987	-105.719
2012-12-18 06:28:40	101.23	103.93	9.51491	-103.191	-105.943
2012-12-18 06:38:40	101.46	104.13	9.52185	-103.425	-106.147
2012-12-18 06:48:40	101.69	104.38	9.5288	-103.66	-106.402
2012-12-18 06:58:40	101.92	104.6	9.53574	-103.894	-106.626
2012-12-18 07:08:40	102.11	104.78	9.54268	-104.088	-106.809	2012-12-18 07:08:40
2012-12-18 07:18:40	102.33	105.03	9.54963	-104.312	-107.064
2012-12-18 07:28:40	102.53	105.24	9.55657	-104.516	-107.278
2012-12-18 07:38:40	102.76	105.46	9.56352	-104.75	-107.503
2012-12-18 07:48:40	102.97	105.67	9.57046	-104.964	-107.717
2012-12-18 07:58:40	103.17	105.88	9.57741	-105.168	-107.931
2012-12-18 08:08:40	103.37	106.02	9.58435	-105.372	-108.073	2012-12-18 08:08:40
2012-12-18 08:18:40	103.56	106.26	9.5913	-105.566	-108.318
2012-12-18 08:28:40	103.59	106.32	9.59824	-105.596	-108.379
2012-12-18 08:38:40	103.87	106.57	9.60518	-105.882	-108.634
2012-12-18 08:48:40	104.07	106.79	9.61213	-106.086	-108.858
2012-12-18 08:58:40	104.28	107.01	9.61907	-106.3	-109.083
2012-12-18 09:08:40	104.48	107.21	9.62602	-106.504	-109.286	2012-12-18 09:08:40
2012-12-18 09:18:40	104.66	107.37	9.63296	-106.687	-109.45
2012-12-18 09:28:40	104.84	107.56	9.63991	-106.871	-109.643
2012-12-18 09:38:40	104.96	107.72	9.64685	-106.993	-109.806
2012-12-18 09:48:40	105.19	107.92	9.6538	-107.227	-110.01
2012-12-18 09:58:40	105.38	108.13	9.66074	-107.421	-110.224
2012-12-18 10:08:40	105.61	108.34	9.66768	-107.655	-110.438	2012-12-18 10:08:40
2012-12-18 10:18:40	105.78	108.54	9.67463	-107.829	-110.642
2012-12-18 10:28:40	105.96	108.69	9.68157	-108.012	-110.795
2012-12-18 10:38:40	106.15	108.84	9.68852	-108.206	-110.948
2012-12-18 10:48:40	106.37	109.12	9.69546	-108.43	-111.233
2012-12-18 10:58:40	106.61	109.36	9.70241	-108.675	-111.478
2012-12-18 11:08:40	106.79	109.43	9.70935	-108.858	-111.549	2012-12-18 11:08:40
2012-12-18 11:18:40	107.02	109.77	9.7163	-109.093	-111.896
2012-12-18 11:28:40	107.24	110	9.72324	-109.317	-112.13
2012-12-18 11:38:40	107.48	110.22	9.73018	-109.562	-112.355
2012-12-18 11:48:40	107.69	110.45	9.73713	-109.776	-112.589
2012-12-18 11:58:40	107.9	110.66	9.74407	-109.99	-112.803
2012-12-18 12:08:40	108.11	110.88	9.75102	-110.204	-113.028	2012-12-18 12:08:40
2012-12-18 12:18:40	108.32	111.07	9.75796	-110.418	-113.221
2012-12-18 12:28:40	108.52	111.29	9.76491	-110.622	-113.445
2012-12-18 12:38:40	108.77	111.5	9.77185	-110.877	-113.66
2012-12-18 12:48:40	109	111.76	9.7788	-111.111	-113.925
2012-12-18 12:58:40	109.2	111.95	9.78574	-111.315	-114.118
2012-12-18 13:08:40	109.43	112.2	9.79268	-111.549	-114.373	2012-12-18 13:08:40
2012-12-18 13:18:40	109.66	112.39	9.79963	-111.784	-114.567
2012-12-18 13:28:40	109.88	112.61	9.80657	-112.008	-114.791
2012-12-18 13:38:40	110.08	112.85	9.81352	-112.212	-115.036
2012-12-18 13:48:40	110.29	113.05	9.82046	-112.426	-115.24
2012-12-18 13:58:40	110.49	113.29	9.82741	-112.63	-115.484
2012-12-18 14:08:40	110.72	113.48	9.83435	-112.864	-115.678	2012-12-18 14:08:40
2012-12-18 14:18:40	110.92	113.71	9.8413	-113.068	-115.912
2012-12-18 14:28:40	111.15	113.91	9.84824	-113.303	-116.116
2012-12-18 14:38:40	111.39	114.16	9.85518	-113.547	-116.371
2012-12-18 14:48:40	111.61	114.37	9.86213	-113.772	-116.585
2012-12-18 14:58:40	111.79	114.56	9.86907	-113.955	-116.779
2012-12-18 15:08:40	112.04	114.81	9.87602	-114.21	-117.034	2012-12-18 15:08:40
2012-12-18 15:18:40	112.26	115.06	9.88296	-114.434	-117.288
2012-12-18 15:28:40	112.52	115.31	9.88991	-114.699	-117.543
2012-12-18 15:38:40	112.71	115.47	9.89685	-114.893	-117.706
2012-12-18 15:48:40	112.94	115.73	9.9038	-115.127	-117.971
2012-12-18 15:58:40	113.18	115.97	9.91074	-115.372	-118.216
2012-12-18 16:08:40	113.4	116.19	9.91768	-115.596	-118.44	2012-12-18 16:08:40
2012-12-18 16:18:40	113.66	116.46	9.92463	-115.861	-118.716
2012-12-18 16:28:40	113.91	116.56	9.93157	-116.116	-118.818
2012-12-18 16:38:40	113.82	116.62	9.93852	-116.024	-118.879
2012-12-18 16:48:40	114.03	116.85	9.94546	-116.239	-119.113
2012-12-18 16:58:40	114.32	117.12	9.95241	-116.534	-119.388
2012-12-18 17:08:40	114.59	117.44	9.95935	-116.809	-119.715	2012-12-18 17:08:40
2012-12-18 17:18:40	114.84	117.68	9.9663	-117.064	-119.959
2012-12-18 17:28:40	115.08	117.95	9.97324	-117.309	-120.234
2012-12-18 17:38:40	115.33	118.22	9.98018	-117.564	-120.51
2012-12-18 17:48:40	115.6	118.46	9.98713	-117.839	-120.754
2012-12-18 17:58:40	115.84	118.69	9.99407	-118.084	-120.989
2012-12-18 18:08:40	116.08	118.95	10.001	-118.328	-121.254	2012-12-18 18:08:40
2012-12-18 18:18:40	116.3	119.16	10.008	-118.552	-121.468
2012-12-18 18:28:40	116.51	119.41	10.0149	-118.767	-121.723
2012-12-18 18:38:40	116.75	119.66	10.0219	-119.011	-121.978
2012-12-18 18:48:40	117.01	119.91	10.0288	-119.276	-122.232
2012-12-18 18:58:40	117.24	120.13	10.0357	-119.511	-122.457
2012-12-18 19:08:40	117.44	120.37	10.0427	-119.715	-122.701	2012-12-18 19:08:40
2012-12-18 19:18:40	117.74	120.65	10.0496	-120.02	-122.987
2012-12-18 19:28:40	117.87	120.88	10.0566	-120.153	-123.221
2012-12-18 19:38:40	118.24	121.14	10.0635	-120.53	-123.486
2012-12-18 19:48:40	118.47	121.37	10.0705	-120.765	-123.721
2012-12-18 19:58:40	118.72	121.62	10.0774	-121.019	-123.976
2012-12-18 20:08:40	118.98	121.89	10.0844	-121.284	-124.251	2012-12-18 20:08:40
2012-12-18 20:18:40	119.25	122.15	10.0913	-121.56	-124.516
2012-12-18 20:28:40	119.5	122.41	10.0982	-121.814	-124.781
2012-12-18 20:38:40	119.85	122.75	10.1052	-122.171	-125.127
2012-12-18 20:48:40	120.11	123.03	10.1121	-122.436	-125.413
2012-12-18 20:58:40	120.37	123.29	10.1191	-122.701	-125.678
2012-12-18 21:08:40	120.6	123.53	10.126	-122.936	-125.923	2012-12-18 21:08:40
2012-12-18 21:18:40	120.88	123.79	10.133	-123.221	-126.188
2012-12-18 21:28:40	121.12	124.04	10.1399	-123.466	-126.442
2012-12-18 21:38:40	121.38	124.3	10.1469	-123.731	-126.707
2012-12-18 21:48:40	121.6	124.54	10.1538	-123.955	-126.952
2012-12-18 21:58:40	121.88	124.8	10.1607	-124.241	-127.217
2012-12-18 22:08:40	122.13	125.05	10.1677	-124.495	-127.472	2012-12-18 22:08:40
2012-12-18 22:18:40	122.38	125.31	10.1746	-124.75	-127.737
2012-12-18 22:28:40	122.65	125.57	10.1816	-125.025	-128.002
2012-12-18 22:38:40	122.87	125.82	10.1885	-125.25	-128.257
2012-12-18 22:48:40	123.13	126.06	10.1955	-125.515	-128.502
2012-12-18 22:58:40	123.35	126.3	10.2024	-125.739	-128.746
2012-12-18 23:08:40	123.61	126.55	10.2094	-126.004	-129.001	2012-12-18 23:08:40
2012-12-18 23:18:40	123.85	126.8	10.2163	-126.249	-129.256
2012-12-18 23:28:40	124.1	127.06	10.2232	-126.504	-129.521
2012-12-18 23:38:40	124.35	127.3	10.2302	-126.758	-129.766
2012-12-18 23:48:40	124.59	127.54	10.2371	-127.003	-130.01
2012-12-18 23:58:40	124.84	127.8	10.2441	-127.258	-130.275
2012-12-19 00:08:40	125.11	128.05	10.251	-127.533	-130.53	2012-12-19 00:08:40
2012-12-19 00:18:40	125.31	128.27	10.258	-127.737	-130.754
2012-12-19 00:28:40	125.57	128.53	10.2649	-128.002	-131.019
2012-12-19 00:38:40	125.82	128.78	10.2719	-128.257	-131.274
2012-12-19 00:48:40	126.07	129.01	10.2788	-128.512	-131.509
2012-12-19 00:58:40	126.31	129.27	10.2857	-128.756	-131.774
2012-12-19 01:08:40	126.55	129.5	10.2927	-129.001	-132.008	2012-12-19 01:08:40
2012-12-19 01:18:40	126.78	129.72	10.2996	-129.235	-132.232
2012-12-19 01:28:40	127.03	129.98	10.3066	-129.49	-132.497
2012-12-19 01:38:40	127.22	130.21	10.3135	-129.684	-132.732
2012-12-19 01:48:40	127.49	130.41	10.3205	-129.959	-132.936
2012-12-19 01:58:40	127.73	130.69	10.3274	-130.204	-133.221
2012-12-19 02:08:40	127.97	130.95	10.3344	-130.449	-133.486	2012-12-19 02:08:40
2012-12-19 02:18:40	128.22	131.21	10.3413	-130.703	-133.751
2012-12-19 02:28:40	128.47	131.46	10.3482	-130.958	-134.006
2012-12-19 02:38:40	128.72	131.71	10.3552	-131.213	-134.261
2012-12-19 02:48:40	128.96	131.98	10.3621	-131.458	-134.536
2012-12-19 02:58:40	129.2	132.23	10.3691	-131.702	-134.791
2012-12-19 03:08:40	129.43	132.41	10.376	-131.937	-134.975	2012-12-19 03:08:40
2012-12-19 03:18:40	129.65	132.65	10.383	-132.161	-135.219
2012-12-19 03:28:40	129.9	132.91	10.3899	-132.416	-135.484
2012-12-19 03:38:40	130.15	133.17	10.3969	-132.671	-135.749
2012-12-19 03:48:40	130.4	133.42	10.4038	-132.926	-136.004
2012-12-19 03:58:40	130.61	133.66	10.4107	-133.14	-136.249
2012-12-19 04:08:40	130.86	133.91	10.4177	-133.394	-136.504	2012-12-19 04:08:40
2012-12-19 04:18:40	131.12	134.15	10.4246	-133.66	-136.748
2012-12-19 04:28:40	131.35	134.4	10.4316	-133.894	-137.003
2012-12-19 04:38:40	131.58	134.6	10.4385	-134.128	-137.207
2012-12-19 04:48:40	131.81	134.86	10.4455	-134.363	-137.472
2012-12-19 04:58:40	132.08	135.13	10.4524	-134.638	-137.747
2012-12-19 05:08:40	132.31	135.36	10.4594	-134.873	-137.982	2012-12-19 05:08:40
2012-12-19 05:18:40	132.56	135.63	10.4663	-135.127	-138.257
2012-12-19 05:28:40	132.81	135.83	10.4732	-135.382	-138.461
2012-12-19 05:38:40	133.04	136.09	10.4802	-135.617	-138.726
2012-12-19 05:48:40	133.28	136.36	10.4871	-135.861	-139.001
2012-12-19 05:58:40	133.54	136.63	10.4941	-136.126	-139.276
2012-12-19 06:08:40	133.78	136.85	10.501	-136.371	-139.501	2012-12-19 06:08:40
2012-12-19 06:18:40	134.01	137.09	10.508	-136.606	-139.745
2012-12-19 06:28:40	134.23	137.34	10.5149	-136.83	-140
2012-12-19 06:38:40	134.45	137.54	10.5219	-137.054	-140.204
2012-12-19 06:48:40	134.73	137.79	10.5288	-137.339	-140.459
2012-12-19 06:58:40	134.94	138.02	10.5357	-137.554	-140.693
2012-12-19 07:08:40	135.17	138.27	10.5427	-137.788	-140.948	2012-12-19 07:08:40
2012-12-19 07:18:40	135.41	138.52	10.5496	-138.033	-141.203
2012-12-19 07:28:40	135.61	138.78	10.5566	-138.236	-141.468
2012-12-19 07:38:40	135.88	139.03	10.5635	-138.512	-141.723
2012-12-19 07:48:40	136.1	139.23	10.5705	-138.736	-141.927
2012-12-19 07:58:40	136.3	139.49	10.5774	-138.94	-142.192
2012-12-19 08:08:40	136.56	139.72	10.5844	-139.205	-142.426	2012-12-19 08:08:40
2012-12-19 08:18:40	136.5	139.47	10.5913	-139.144	-142.171
2012-12-19 08:28:40	137	139.9	10.5982	-139.653	-142.61
2012-12-19 08:38:40	137.25	140.15	10.6052	-139.908	-142.864
2012-12-19 08:48:40	137.5	140.4	10.6121	-140.163	-143.119
2012-12-19 08:58:40	137.67	140.6	10.6191	-140.336	-143.323
2012-12-19 09:08:40	137.95	140.84	10.626	-140.622	-143.568	2012-12-19 09:08:40
2012-12-19 09:18:40	138.17	141.06	10.633	-140.846	-143.792
2012-12-19 09:28:40	138.41	141.31	10.6399	-141.091	-144.047
2012-12-19 09:38:40	138.64	141.55	10.6469	-141.325	-144.292
2012-12-19 09:48:40	138.88	141.79	10.6538	-141.57	-144.536
2012-12-19 09:58:40	139.11	142.02	10.6607	-141.804	-144.771
2012-12-19 10:08:40	139.36	142.29	10.6677	-142.059	-145.046	2012-12-19 10:08:40
2012-12-19 10:18:40	139.52	142.48	10.6746	-142.222	-145.24
2012-12-19 10:28:40	139.77	142.69	10.6816	-142.477	-145.454
2012-12-19 10:38:40	140	142.95	10.6885	-142.712	-145.719
2012-12-19 10:48:40	140.22	143.14	10.6955	-142.936	-145.912
2012-12-19 10:58:40	140.47	143.38	10.7024	-143.191	-146.157
2012-12-19 11:08:40	140.67	143.63	10.7094	-143.394	-146.412	2012-12-19 11:08:40
2012-12-19 11:18:40	140.93	143.84	10.7163	-143.66	-146.626
2012-12-19 11:28:40	141.15	144.05	10.7232	-143.884	-146.84
2012-12-19 11:38:40	141.36	144.29	10.7302	-144.098	-147.085
2012-12-19 11:48:40	141.59	144.51	10.7371	-144.332	-147.309
2012-12-19 11:58:40	141.93	144.87	10.7441	-144.679	-147.676
2012-12-19 12:08:40	142.16	145.07	10.751	-144.913	-147.88	2012-12-19 12:08:40
2012-12-19 12:18:40	142.39	145.33	10.758	-145.148	-148.145
2012-12-19 12:28:40	142.62	145.55	10.7649	-145.382	-148.369
2012-12-19 12:38:40	142.86	145.78	10.7719	-145.627	-148.603
2012-12-19 12:48:40	143.07	146.02	10.7788	-145.841	-148.848
2012-12-19 12:58:40	143.3	146.25	10.7857	-146.075	-149.083
2012-12-19 13:08:40	143.54	146.48	10.7927	-146.32	-149.317	2012-12-19 13:08:40
2012-12-19 13:18:40	143.77	146.7	10.7996	-146.555	-149.541
2012-12-19 13:28:40	144.01	146.95	10.8066	-146.799	-149.796
2012-12-19 13:38:40	144.23	147.17	10.8135	-147.023	-150.02
2012-12-19 13:48:40	144.46	147.37	10.8205	-147.258	-150.224
2012-12-19 13:58:40	144.66	147.6	10.8274	-147.462	-150.459
2012-12-19 14:08:40	144.86	147.82	10.8344	-147.666	-150.683	2012-12-19 14:08:40
2012-12-19 14:18:40	145.04	148.03	10.8413	-147.849	-150.897
2012-12-19 14:28:40	145.26	148.25	10.8482	-148.073	-151.121
2012-12-19 14:38:40	145.48	148.46	10.8552	-148.298	-151.335
2012-12-19 14:48:40	145.68	148.67	10.8621	-148.502	-151.549
2012-12-19 14:58:40	145.88	148.87	10.8691	-148.705	-151.753
2012-12-19 15:08:40	146.1	149.09	10.876	-148.93	-151.978	2012-12-19 15:08:40
2012-12-19 15:18:40	146.31	149.29	10.883	-149.144	-152.181
2012-12-19 15:28:40	146.51	149.52	10.8899	-149.348	-152.416
2012-12-19 15:38:40	146.74	149.73	10.8969	-149.582	-152.63
2012-12-19 15:48:40	146.94	149.93	10.9038	-149.786	-152.834
2012-12-19 15:58:40	147.09	150.14	10.9107	-149.939	-153.048
2012-12-19 16:08:40	147.36	150.37	10.9177	-150.214	-153.282	2012-12-19 16:08:40
2012-12-19 16:18:40	147.55	150.58	10.9246	-150.408	-153.496
2012-12-19 16:28:40	147.77	150.64	10.9316	-150.632	-153.558
2012-12-19 16:38:40	147.98	150.95	10.9385	-150.846	-153.874
2012-12-19 16:48:40	148.24	151.03	10.9455	-151.111	-153.955
2012-12-19 16:58:40	148.53	151.24	10.9524	-151.407	-154.169
2012-12-19 17:08:40	148.75	151.45	10.9594	-151.631	-154.383	2012-12-19 17:08:40
2012-12-19 17:18:40	149	151.66	10.9663	-151.886	-154.597
2012-12-19 17:28:40	149.21	151.87	10.9732	-152.1	-154.811
2012-12-19 17:38:40	149.43	152.07	10.9802	-152.324	-155.015
2012-12-19 17:48:40	149.66	152.3	10.9871	-152.559	-155.25
2012-12-19 17:58:40	149.87	152.5	10.9941	-152.773	-155.454
2012-12-19 18:08:40	150.07	152.72	11.001	-152.977	-155.678	2012-12-19 18:08:40
2012-12-19 18:18:40	150.28	152.94	11.008	-153.191	-155.902
2012-12-19 18:28:40	150.49	153.14	11.0149	-153.405	-156.106
2012-12-19 18:38:40	150.71	153.35	11.0219	-153.629	-156.32
2012-12-19 18:48:40	150.94	153.56	11.0288	-153.863	-156.534
2012-12-19 18:58:40	151.12	153.78	11.0357	-154.047	-156.758
2012-12-19 19:08:40	151.34	153.98	11.0427	-154.271	-156.962	2012-12-19 19:08:40
2012-12-19 19:18:40	151.5	154.17	11.0496	-154.434	-157.156
2012-12-19 19:28:40	151.77	154.42	11.0566	-154.709	-157.411
2012-12-19 19:38:40	151.98	154.65	11.0635	-154.924	-157.645
2012-12-19 19:48:40	152.21	154.86	11.0705	-155.158	-157.859
2012-12-19 19:58:40	152.42	155.07	11.0774	-155.372	-158.073
2012-12-19 20:08:40	152.63	155.28	11.0844	-155.586	-158.287	2012-12-19 20:08:40
2012-12-19 20:18:40	152.85	155.52	11.0913	-155.81	-158.532
2012-12-19 20:28:40	153.05	155.73	11.0982	-156.014	-158.746
2012-12-19 20:38:40	153.28	155.95	11.1052	-156.249	-158.97
2012-12-19 20:48:40	153.48	156.17	11.1121	-156.453	-159.195
2012-12-19 20:58:40	153.69	156.35	11.1191	-156.667	-159.378
2012-12-19 21:08:40	153.89	156.58	11.126	-156.871	-159.613	2012-12-19 21:08:40
2012-12-19 21:18:40	154.11	156.77	11.133	-157.095	-159.806
2012-12-19 21:28:40	154.31	157	11.1399	-157.299	-160.041
2012-12-19 21:38:40	154.53	157.21	11.1469	-157.523	-160.255
2012-12-19 21:48:40	154.71	157.41	11.1538	-157.706	-160.459
2012-12-19 21:58:40	154.92	157.6	11.1607	-157.92	-160.652
2012-12-19 22:08:40	155.08	157.81	11.1677	-158.084	-160.866	2012-12-19 22:08:40
2012-12-19 22:18:40	155.31	158.04	11.1746	-158.318	-161.101
2012-12-19 22:28:40	155.52	158.24	11.1816	-158.532	-161.305
2012-12-19 22:38:40	155.73	158.47	11.1885	-158.746	-161.539
2012-12-19 22:48:40	155.89	158.66	11.1955	-158.909	-161.733
2012-12-19 22:58:40	156.11	158.85	11.2024	-159.134	-161.927
2012-12-19 23:08:40	156.28	159.06	11.2094	-159.307	-162.141	2012-12-19 23:08:40
2012-12-19 23:18:40	156.47	159.23	11.2163	-159.501	-162.314
2012-12-19 23:28:40	156.61	159.42	11.2232	-159.643	-162.508
2012-12-19 23:38:40	156.83	159.59	11.2302	-159.867	-162.681
2012-12-19 23:48:40	156.97	159.74	11.2371	-160.01	-162.834
2012-12-19 23:58:40	157.16	159.96	11.2441	-160.204	-163.058
2012-12-20 00:08:40	157.35	160.18	11.251	-160.398	-163.282	2012-12-20 00:08:40
2012-12-20 00:18:40	157.55	160.34	11.258	-160.601	-163.445
2012-12-20 00:28:40	157.74	160.54	11.2649	-160.795	-163.649
2012-12-20 00:38:40	157.93	160.76	11.2719	-160.989	-163.874
2012-12-20 00:48:40	158.1	160.91	11.2788	-161.162	-164.027
2012-12-20 00:58:40	158.29	161.12	11.2857	-161.356	-164.241
2012-12-20 01:08:40	158.49	161.33	11.2927	-161.56	-164.455	2012-12-20 01:08:40
2012-12-20 01:18:40	158.66	161.51	11.2996	-161.733	-164.638
2012-12-20 01:28:40	158.88	161.72	11.3066	-161.957	-164.852
2012-12-20 01:38:40	159.07	161.9	11.3135	-162.151	-165.036
2012-12-20 01:48:40	159.24	162.07	11.3205	-162.324	-165.209
2012-12-20 01:58:40	159.44	162.27	11.3274	-162.528	-165.413
2012-12-20 02:08:40	159.6	162.45	11.3344	-162.691	-165.596	2012-12-20 02:08:40
2012-12-20 02:18:40	159.78	162.64	11.3413	-162.875	-165.79
2012-12-20 02:28:40	159.96	162.83	11.3482	-163.058	-165.984
2012-12-20 02:38:40	160.27	163.14	11.3552	-163.374	-166.3
2012-12-20 02:48:40	160.44	163.3	11.3621	-163.547	-166.463
2012-12-20 02:58:40	160.59	163.48	11.3691	-163.7	-166.646
2012-12-20 03:08:40	160.77	163.7	11.376	-163.884	-166.871	2012-12-20 03:08:40
2012-12-20 03:18:40	160.94	163.87	11.383	-164.057	-167.044
2012-12-20 03:28:40	161.08	164.06	11.3899	-164.2	-167.238
2012-12-20 03:38:40	161.28	164.23	11.3969	-164.404	-167.411
2012-12-20 03:48:40	161.45	164.42	11.4038	-164.577	-167.604
2012-12-20 03:58:40	161.63	164.6	11.4107	-164.76	-167.788
2012-12-20 04:08:40	161.8	164.75	11.4177	-164.934	-167.941	2012-12-20 04:08:40
2012-12-20 04:18:40	161.99	164.96	11.4246	-165.127	-168.155
2012-12-20 04:28:40	162.15	165.15	11.4316	-165.291	-168.349
2012-12-20 04:38:40	162.34	165.33	11.4385	-165.484	-168.532
2012-12-20 04:48:40	162.52	165.53	11.4455	-165.668	-168.736
2012-12-20 04:58:40	162.69	165.71	11.4524	-165.841	-168.919
2012-12-20 05:08:40	162.86	165.89	11.4594	-166.014	-169.103	2012-12-20 05:08:40
2012-12-20 05:18:40	163.01	166.04	11.4663	-166.167	-169.256
2012-12-20 05:28:40	163.2	166.24	11.4732	-166.361	-169.46
2012-12-20 05:38:40	163.37	166.42	11.4802	-166.534	-169.643
2012-12-20 05:48:40	163.55	166.62	11.4871	-166.718	-169.847
2012-12-20 05:58:40	163.73	166.77	11.4941	-166.901	-170
2012-12-20 06:08:40	163.9	166.98	11.501	-167.074	-170.214	2012-12-20 06:08:40
2012-12-20 06:18:40	164.07	167.14	11.508	-167.248	-170.377
2012-12-20 06:28:40	164.24	167.34	11.5149	-167.421	-170.581
2012-12-20 06:38:40	164.34	167.51	11.5219	-167.523	-170.754
2012-12-20 06:48:40	164.55	167.69	11.5288	-167.737	-170.938
2012-12-20 06:58:40	164.7	167.83	11.5357	-167.89	-171.081
2012-12-20 07:08:40	164.9	167.87	11.5427	-168.094	-171.121	2012-12-20 07:08:40
2012-12-20 07:18:40	165.04	168.21	11.5496	-168.236	-171.468
2012-12-20 07:28:40	165.17	168.36	11.5566	-168.369	-171.621
2012-12-20 07:38:40	165.22	168.52	11.5635	-168.42	-171.784
2012-12-20 07:48:40	165.43	168.69	11.5705	-168.634	-171.957
2012-12-20 07:58:40	165.53	168.82	11.5774	-168.736	-172.09
2012-12-20 08:08:40	165.67	168.99	11.5844	-168.879	-172.263	2012-12-20 08:08:40
2012-12-20 08:18:40	165.78	169.09	11.5913	-168.991	-172.365
2012-12-20 08:28:40	163.85	168.1	11.5982	-167.023	-171.356
2012-12-20 08:38:40	165.5	169.28	11.6052	-168.705	-172.559
2012-12-20 08:48:40	165.74	169.46	11.6121	-168.95	-172.742
2012-12-20 08:58:40	165.91	169.71	11.6191	-169.123	-172.997
2012-12-20 09:08:40	166.1	169.88	11.626	-169.317	-173.17	2012-12-20 09:08:40
2012-12-20 09:18:40	166.3	170.08	11.633	-169.521	-173.374
2012-12-20 09:28:40	166.45	170.28	11.6399	-169.674	-173.578
2012-12-20 09:38:40	166.66	170.43	11.6469	-169.888	-173.731
2012-12-20 09:48:40	166.8	170.62	11.6538	-170.031	-173.925
2012-12-20 09:58:40	166.99	170.82	11.6607	-170.224	-174.128
2012-12-20 10:08:40	167.18	170.95	11.6677	-170.418	-174.261	2012-12-20 10:08:40
2012-12-20 10:18:40	167.36	171.13	11.6746	-170.601	-174.444
2012-12-20 10:28:40	167.48	171.26	11.6816	-170.724	-174.577
2012-12-20 10:38:40	167.61	171.37	11.6885	-170.856	-174.689
2012-12-20 10:48:40	167.69	171.5	11.6955	-170.938	-174.822
2012-12-20 10:58:40	167.8	171.62	11.7024	-171.05	-174.944
2012-12-20 11:08:40	167.93	171.75	11.7094	-171.182	-175.076	2012-12-20 11:08:40
2012-12-20 11:18:40	168.03	171.91	11.7163	-171.284	-175.24
2012-12-20 11:28:40	168.15	172.06	11.7232	-171.407	-175.392
2012-12-20 11:38:40	167.56	172.08	11.7302	-170.805	-175.413
2012-12-20 11:48:40	167.92	171.98	11.7371	-171.172	-175.311
2012-12-20 11:58:40	168.49	172.62	11.7441	-171.753	-175.963
2012-12-20 12:08:40	168.73	172.89	11.751	-171.998	-176.239	2012-12-20 12:08:40
2012-12-20 12:18:40	168.96	173.13	11.758	-172.232	-176.483
2012-12-20 12:28:40	169.2	173.42	11.7649	-172.477	-176.779
2012-12-20 12:38:40	169.34	173.6	11.7719	-172.62	-176.962
2012-12-20 12:48:40	169.62	173.87	11.7788	-172.905	-177.238
2012-12-20 12:58:40	169.84	174.09	11.7857	-173.129	-177.462
2012-12-20 13:08:40	170.1	174.34	11.7927	-173.394	-177.717	2012-12-20 13:08:40
2012-12-20 13:18:40	170.3	174.59	11.7996	-173.598	-177.971
2012-12-20 13:28:40	170.56	174.87	11.8066	-173.863	-178.257
2012-12-20 13:38:40	170.74	175.06	11.8135	-174.047	-178.451
2012-12-20 13:48:40	170.91	175.33	11.8205	-174.22	-178.726
2012-12-20 13:58:40	171.12	175.6	11.8274	-174.434	-179.001
2012-12-20 14:08:40	171.35	175.8	11.8344	-174.669	-179.205	2012-12-20 14:08:40
2012-12-20 14:18:40	171.55	176.07	11.8413	-174.873	-179.48
2012-12-20 14:28:40	171.78	176.24	11.8482	-175.107	-179.653
2012-12-20 14:38:40	171.98	176.49	11.8552	-175.311	-179.908
2012-12-20 14:48:40	172.14	176.67	11.8621	-175.474	-180.092
2012-12-20 14:58:40	172.38	176.87	11.8691	-175.719	-180.296
2012-12-20 15:08:40	172.54	177.13	11.876	-175.882	-180.561	2012-12-20 15:08:40
2012-12-20 15:18:40	172.72	177.39	11.883	-176.065	-180.826
2012-12-20 15:28:40	172.93	177.58	11.8899	-176.279	-181.019
2012-12-20 15:38:40	173.12	177.82	11.8969	-176.473	-181.264
2012-12-20 15:48:40	173.31	178.04	11.9038	-176.667	-181.488
2012-12-20 15:58:40	173.49	178.26	11.9107	-176.85	-181.713
2012-12-20 16:08:40	173.7	178.49	11.9177	-177.064	-181.947	2012-12-20 16:08:40
2012-12-20 16:18:40	173.89	178.66	11.9246	-177.258	-182.12
2012-12-20 16:28:40	174.08	178.88	11.9316	-177.452	-182.345
2012-12-20 16:38:40	174.26	179.1	11.9385	-177.635	-182.569
2012-12-20 16:48:40	174.42	179.32	11.9455	-177.798	-182.793
2012-12-20 16:58:40	174.59	179.5	11.9524	-177.971	-182.977
2012-12-20 17:08:40	174.81	179.72	11.9594	-178.196	-183.201	2012-12-20 17:08:40
2012-12-20 17:18:40	174.69	179.95	11.9663	-178.073	-183.435
2012-12-20 17:28:40	174.11	179.36	11.9732	-177.482	-182.834
2012-12-20 17:38:40	175.24	180.22	11.9802	-178.634	-183.71
2012-12-20 17:48:40	175.44	180.42	11.9871	-178.838	-183.914
2012-12-20 17:58:40	175.65	180.64	11.9941	-179.052	-184.139
2012-12-20 18:08:40	175.77	180.82	12.001	-179.174	-184.322	2012-12-20 18:08:40
2012-12-20 18:18:40	175.95	181.04	12.008	-179.358	-184.546
2012-12-20 18:28:40	176.14	181.19	12.0149	-179.551	-184.699
2012-12-20 18:38:40	176.34	181.39	12.0219	-179.755	-184.903
2012-12-20 18:48:40	176.47	181.57	12.0288	-179.888	-185.087
2012-12-20 18:58:40	176.66	181.75	12.0357	-180.082	-185.27
2012-12-20 19:08:40	176.85	181.96	12.0427	-180.275	-185.484	2012-12-20 19:08:40
2012-12-20 19:18:40	177.04	182.11	12.0496	-180.469	-185.637
2012-12-20 19:28:40	177.1	182.32	12.0566	-180.53	-185.851
2012-12-20 19:38:40	177.37	182.51	12.0635	-180.805	-186.045
2012-12-20 19:48:40	177.57	182.67	12.0705	-181.009	-186.208
2012-12-20 19:58:40	177.73	182.87	12.0774	-181.172	-186.412
2012-12-20 20:08:40	177.89	182.96	12.0844	-181.335	-186.504	2012-12-20 20:08:40
2012-12-20 20:18:40	178.06	183.27	12.0913	-181.509	-186.82
2012-12-20 20:28:40	178.24	183.43	12.0982	-181.692	-186.983
2012-12-20 20:38:40	178.42	183.65	12.1052	-181.876	-187.207
2012-12-20 20:48:40	178.6	183.77	12.1121	-182.059	-187.329
2012-12-20 20:58:40	178.77	183.96	12.1191	-182.232	-187.523
2012-12-20 21:08:40	178.95	184.18	12.126	-182.416	-187.747	2012-12-20 21:08:40
2012-12-20 21:18:40	179.09	184.4	12.133	-182.559	-187.971
2012-12-20 21:28:40	179.28	184.59	12.1399	-182.752	-188.165
2012-12-20 21:38:40	179.45	184.71	12.1469	-182.926	-188.287
2012-12-20 21:48:40	179.62	184.96	12.1538	-183.099	-188.542
2012-12-20 21:58:40	179.73	185.16	12.1607	-183.211	-188.746
2012-12-20 22:08:40	179.87	185.35	12.1677	-183.354	-188.94	2012-12-20 22:08:40
2012-12-20 22:18:40	180.03	185.51	12.1746	-183.517	-189.103
2012-12-20 22:28:40	180.23	185.73	12.1816	-183.721	-189.327
2012-12-20 22:38:40	180.39	185.9	12.1885	-183.884	-189.501
2012-12-20 22:48:40	180.59	186.11	12.1955	-184.088	-189.715
2012-12-20 22:58:40	180.73	186.28	12.2024	-184.23	-189.888
2012-12-20 23:08:40	180.89	186.51	12.2094	-184.393	-190.122	2012-12-20 23:08:40
2012-12-20 23:18:40	181	186.68	12.2163	-184.506	-190.296
2012-12-20 23:28:40	181.22	186.88	12.2232	-184.73	-190.499
2012-12-20 23:38:40	181.4	187.1	12.2302	-184.913	-190.724
2012-12-20 23:48:40	181.55	187.24	12.2371	-185.066	-190.866
2012-12-20 23:58:40	181.72	187.46	12.2441	-185.24	-191.091
2012-12-21 00:08:40	181.89	187.65	12.251	-185.413	-191.284	2012-12-21 00:08:40
2012-12-21 00:18:40	182.04	187.84	12.258	-185.566	-191.478
2012-12-21 00:28:40	182.2	188.07	12.2649	-185.729	-191.713
2012-12-21 00:38:40	182.37	188.25	12.2719	-185.902	-191.896
2012-12-21 00:48:40	182.51	188.48	12.2788	-186.045	-192.13
2012-12-21 00:58:40	182.7	188.65	12.2857	-186.239	-192.304
2012-12-21 01:08:40	182.84	188.84	12.2927	-186.381	-192.497	2012-12-21 01:08:40
2012-12-21 01:18:40	182.99	189.01	12.2996	-186.534	-192.671
2012-12-21 01:28:40	183.15	189.23	12.3066	-186.697	-192.895
2012-12-21 01:38:40	183.34	189.42	12.3135	-186.891	-193.089
2012-12-21 01:48:40	183.49	189.6	12.3205	-187.044	-193.272
2012-12-21 01:58:40	183.66	189.83	12.3274	-187.217	-193.507
2012-12-21 02:08:40	183.8	190.02	12.3344	-187.36	-193.7	2012-12-21 02:08:40
2012-12-21 02:18:40	183.95	190.21	12.3413	-187.513	-193.894
2012-12-21 02:28:40	184.09	190.41	12.3482	-187.655	-194.098
2012-12-21 02:38:40	184.28	190.58	12.3552	-187.849	-194.271
2012-12-21 02:48:40	184.41	190.76	12.3621	-187.982	-194.455
2012-12-21 02:58:40	184.59	190.99	12.3691	-188.165	-194.689
2012-12-21 03:08:40	184.75	191.2	12.376	-188.328	-194.903	2012-12-21 03:08:40
2012-12-21 03:18:40	184.9	191.36	12.383	-188.481	-195.066
2012-12-21 03:28:40	184.94	191.62	12.3899	-188.522	-195.331
2012-12-21 03:38:40	185.25	191.79	12.3969	-188.838	-195.505
2012-12-21 03:48:40	185.39	191.98	12.4038	-188.981	-195.698
2012-12-21 03:58:40	185.55	192.17	12.4107	-189.144	-195.892
2012-12-21 04:08:40	185.71	192.4	12.4177	-189.307	-196.126	2012-12-21 04:08:40
2012-12-21 04:18:40	185.67	192.55	12.4246	-189.266	-196.279
2012-12-21 04:28:40	185.99	192.79	12.4316	-189.592	-196.524
2012-12-21 04:38:40	186.16	193.04	12.4385	-189.766	-196.779
2012-12-21 04:48:40	186.19	193.23	12.4455	-189.796	-196.972
2012-12-21 04:58:40	186.47	193.43	12.4524	-190.082	-197.176
2012-12-21 05:08:40	186.62	193.57	12.4594	-190.234	-197.319	2012-12-21 05:08:40
2012-12-21 05:18:40	186.81	193.84	12.4663	-190.428	-197.594
2012-12-21 05:28:40	186.95	194.05	12.4732	-190.571	-197.808
2012-12-21 05:38:40	187.12	194.24	12.4802	-190.744	-198.002
2012-12-21 05:48:40	187.28	194.39	12.4871	-190.907	-198.155
2012-12-21 05:58:40	187.43	194.64	12.4941	-191.06	-198.41
2012-12-21 06:08:40	187.6	194.84	12.501	-191.233	-198.614	2012-12-21 06:08:40
2012-12-21 06:18:40	187.79	195.03	12.508	-191.427	-198.807
2012-12-21 06:28:40	187.91	195.21	12.5149	-191.549	-198.991
2012-12-21 06:38:40	188.07	195.44	12.5219	-191.713	-199.225
2012-12-21 06:48:40	188.28	195.41	12.5288	-191.927	-199.195
2012-12-21 06:58:40	188.43	195.81	12.5357	-192.08	-199.602
2012-12-21 07:08:40	188.6	195.99	12.5427	-192.253	-199.786	2012-12-21 07:08:40
2012-12-21 07:18:40	188.77	196.22	12.5496	-192.426	-200.02
2012-12-21 07:28:40	188.88	196.44	12.5566	-192.538	-200.245
2012-12-21 07:38:40	189.04	196.64	12.5635	-192.701	-200.449
2012-12-21 07:48:40	189.18	196.8	12.5705	-192.844	-200.612
2012-12-21 07:58:40	189.34	196.98	12.5774	-193.007	-200.795
2012-12-21 08:08:40	189.43	196.94	12.5844	-193.099	-200.754	2012-12-21 08:08:40
2012-12-21 08:18:40	176.25	189.51	12.5913	-179.664	-193.18
2012-12-21 08:28:40	188.98	196.91	12.5982	-192.64	-200.724
2012-12-21 08:38:40	189.49	197.31	12.6052	-193.16	-201.131
2012-12-21 08:48:40	189.76	197.57	12.6121	-193.435	-201.397
2012-12-21 08:58:40	189.95	197.81	12.6191	-193.629	-201.641
2012-12-21 09:08:40	190.18	198.05	12.626	-193.863	-201.886	2012-12-21 09:08:40
2012-12-21 09:18:40	190.35	198.26	12.633	-194.037	-202.1
2012-12-21 09:28:40	190.55	198.46	12.6399	-194.241	-202.304
2012-12-21 09:38:40	190.69	198.68	12.6469	-194.383	-202.528
2012-12-21 09:48:40	190.9	198.9	12.6538	-194.597	-202.752
2012-12-21 09:58:40	191.05	199.1	12.6607	-194.75	-202.956
2012-12-21 10:08:40	191.24	199.31	12.6677	-194.944	-203.17	2012-12-21 10:08:40
2012-12-21 10:18:40	191.43	199.5	12.6746	-195.138	-203.364
2012-12-21 10:28:40	191.6	199.77	12.6816	-195.311	-203.639
2012-12-21 10:38:40	191.77	199.92	12.6885	-195.484	-203.792
2012-12-21 10:48:40	191.92	200.07	12.6955	-195.637	-203.945
2012-12-21 10:58:40	192.08	200.33	12.7024	-195.8	-204.21
2012-12-21 11:08:40	192.18	200.56	12.7094	-195.902	-204.444	2012-12-21 11:08:40
2012-12-21 11:18:40	192.43	200.78	12.7163	-196.157	-204.669
2012-12-21 11:28:40	192.51	200.98	12.7232	-196.239	-204.873
2012-12-21 11:38:40	192.64	201.17	12.7302	-196.371	-205.066
2012-12-21 11:48:40	192.92	201.42	12.7371	-196.656	-205.321
2012-12-21 11:58:40	193.04	201.63	12.7441	-196.779	-205.535
2012-12-21 12:08:40	193.21	201.8	12.751	-196.952	-205.708	2012-12-21 12:08:40
2012-12-21 12:18:40	193.38	202.02	12.758	-197.125	-205.933
2012-12-21 12:28:40	193.5	202.28	12.7649	-197.248	-206.198
2012-12-21 12:38:40	193.69	202.46	12.7719	-197.441	-206.381
2012-12-21 12:48:40	193.77	202.73	12.7788	-197.523	-206.656
2012-12-21 12:58:40	194.02	202.94	12.7857	-197.778	-206.871
2012-12-21 13:08:40	194.21	203.08	12.7927	-197.971	-207.013	2012-12-21 13:08:40
2012-12-21 13:18:40	194.35	203.3	12.7996	-198.114	-207.238
2012-12-21 13:28:40	194.47	203.56	12.8066	-198.236	-207.503
2012-12-21 13:38:40	194.68	203.72	12.8135	-198.451	-207.666
2012-12-21 13:48:40	194.85	204.01	12.8205	-198.624	-207.961
2012-12-21 13:58:40	195.01	204.25	12.8274	-198.787	-208.206
2012-12-21 14:08:40	195.17	204.41	12.8344	-198.95	-208.369	2012-12-21 14:08:40
2012-12-21 14:18:40	195.32	204.69	12.8413	-199.103	-208.654
2012-12-21 14:28:40	195.47	204.9	12.8482	-199.256	-208.869
2012-12-21 14:38:40	195.7	205.12	12.8552	-199.49	-209.093
2012-12-21 14:48:40	195.87	205.34	12.8621	-199.664	-209.317
2012-12-21 14:58:40	196.02	205.52	12.8691	-199.817	-209.501
2012-12-21 15:08:40	196.19	205.76	12.876	-199.99	-209.745	2012-12-21 15:08:40
2012-12-21 15:18:40	196.34	206.04	12.883	-200.143	-210.031
2012-12-21 15:28:40	196.52	206.16	12.8899	-200.326	-210.153
2012-12-21 15:38:40	196.74	206.55	12.8969	-200.55	-210.55
2012-12-21 15:48:40	196.91	206.75	12.9038	-200.724	-210.754
2012-12-21 15:58:40	197.03	206.95	12.9107	-200.846	-210.958
2012-12-21 16:08:40	197.23	207.06	12.9177	-201.05	-211.07	2012-12-21 16:08:40
2012-12-21 16:18:40	197.44	207.38	12.9246	-201.264	-211.397
2012-12-21 16:28:40	197.6	207.71	12.9316	-201.427	-211.733
2012-12-21 16:38:40	197.98	208.09	12.9385	-201.814	-212.12
2012-12-21 16:48:40	198.12	208.24	12.9455	-201.957	-212.273
2012-12-21 16:58:40	198.17	208.59	12.9524	-202.008	-212.63
2012-12-21 17:08:40	198.4	208.8	12.9594	-202.243	-212.844	2012-12-21 17:08:40
2012-12-21 17:18:40	198.59	209.08	12.9663	-202.436	-213.129
2012-12-21 17:28:40	198.75	209.34	12.9732	-202.599	-213.394
2012-12-21 17:38:40	198.94	209.59	12.9802	-202.793	-213.649
2012-12-21 17:48:40	199.14	209.86	12.9871	-202.997	-213.925
2012-12-21 17:58:40	199.34	210.08	12.9941	-203.201	-214.149
2012-12-21 18:08:40	199.54	210.38	13.001	-203.405	-214.455	2012-12-21 18:08:40
2012-12-21 18:18:40	199.69	210.66	13.008	-203.558	-214.74
2012-12-21 18:28:40	192.17	207.06	13.0149	-195.892	-211.07
2012-12-21 18:38:40	199.81	210.68	13.0219	-203.68	-214.76
2012-12-21 18:48:40	200.17	211.09	13.0288	-204.047	-215.178
2012-12-21 18:58:40	200.46	211.29	13.0357	-204.343	-215.382
2012-12-21 19:08:40	200.75	211.55	13.0427	-204.638	-215.647	2012-12-21 19:08:40
2012-12-21 19:18:40	200.99	211.77	13.0496	-204.883	-215.872
2012-12-21 19:28:40	201.2	212.03	13.0566	-205.097	-216.137
2012-12-21 19:38:40	201.31	212.36	13.0635	-205.209	-216.473
2012-12-21 19:48:40	201.47	212.62	13.0705	-205.372	-216.738
2012-12-21 19:58:40	201.7	212.8	13.0774	-205.607	-216.922
2012-12-21 20:08:40	201.92	213.14	13.0844	-205.831	-217.268	2012-12-21 20:08:40
2012-12-21 20:18:40	202.07	213.35	13.0913	-205.984	-217.482
2012-12-21 20:28:40	202.25	213.61	13.0982	-206.167	-217.747
2012-12-21 20:38:40	202.44	213.88	13.1052	-206.361	-218.022
2012-12-21 20:48:40	202.63	214.16	13.1121	-206.555	-218.308
[truncated: 1,394 more rows]

## Sheet: Tensi
Zeit [d]	MP bot(2) [cm]	MP top(1) [cm]		air entry bot		AE time	AE [cm]	Type	Pos	Weight
0.00272624	-3.80224	-6.43221		2012-12-29 18:18:40	8800	21.008	-8970.44	1	2	1
0.0443929	-4.26096	-6.82977
0.0860596	-3.70031	-6.2895		air entry top
0.127726	-4.53619	-7.11519		Time				Type	Pos	Weight
0.169393	-6.36086	-8.92966		2012-12-27 18:18:40	8800	19.008	-8970.44	1	1	1
0.21106	-7.67584	-10.265
0.252726	-8.85831	-11.4475
0.294393	-9.98981	-12.5688
0.33606	-10.9378	-13.5168
0.377726	-11.8451	-14.4037
0.419393	-12.5994	-15.1682
0.46106	-12.5688	-15.1376
0.502726	-10.1019	-12.6707
0.544393	-11.1213	-13.6799
0.58606	-12.0693	-14.6381
0.627726	-12.2222	-14.8114
0.669393	-12.8236	-15.4128
0.71106	-13.2926	-15.8512
0.752726	-12.6096	-15.1682
0.794393	-13.6799	-16.2385
0.83606	-14.0571	-16.5851
0.877726	-14.3119	-16.8705
0.919393	-14.6483	-17.1967
0.96106	-14.5566	-17.0846
1.00273	-15.0459	-17.6045
1.04439	-15.474	-18.0122
1.08606	-15.6575	-18.1855
1.12773	-15.9327	-18.4709
1.16939	-16.3507	-18.8787
1.21106	-15.4944	-18.0224
1.25273	-16.6769	-19.2151
1.29439	-17.0133	-19.5617
1.33606	-17.421	-19.949
1.37773	-17.4618	-20
1.41939	-17.7676	-20.3058
1.46106	-17.7778	-20.3364
1.50273	-18.1244	-20.6626
1.54439	-18.3588	-20.9072
1.58606	-18.5015	-21.0398
1.62773	-18.5831	-21.1213
1.66939	-18.6952	-21.2334
1.71106	-18.8685	-21.4067
1.75273	-19.001	-21.5087
1.79268	-19.1743	-21.7125
1.79685	-19.1641	-21.7227
1.80102	-19.2457	-21.7737
1.80518	-19.2355	-21.7737
1.80935	-19.2661	-21.8145
1.81352	-19.2762	-21.8145
1.81768	-19.2864	-21.8247
1.82185	-19.3272	-21.8654
1.82602	-19.3476	-21.8756
1.83018	-19.3986	-21.9164
1.83435	-19.3884	-21.9368
1.87602	-19.6432	-22.1713
1.91768	-19.8573	-22.3751
1.95935	-20.0204	-22.5586
2.00102	-20.1019	-22.6606
2.04268	-20.1121	-22.6504
2.08435	-20.4689	-23.0173
2.12602	-20.6218	-23.1804
2.16768	-20.8665	-23.4149
2.20935	-21.0398	-23.578
2.25102	-21.1009	-23.6493
2.29268	-21.3354	-23.8838
2.33435	-21.5087	-24.0673
2.37602	-20.4587	-22.9969
2.41768	-21.2844	-23.8226
2.45935	-21.6208	-24.1692
2.50102	-21.5902	-24.1182
2.54268	-21.8145	-24.3629
2.58435	-22.0387	-24.5668
2.62602	-22.212	-24.7604
2.66768	-22.2834	-24.8216
2.70935	-22.4465	-24.9949
2.75102	-22.0489	-24.6075
2.79268	-22.7013	-25.2497
2.83435	-22.9052	-25.4536
2.87602	-23.0071	-25.5657
2.91768	-23.2416	-25.7798
2.95935	-22.9562	-25.4842
3.00102	-23.4455	-25.9531
3.04268	-23.6799	-26.1978
3.08435	-23.945	-26.4832
3.12602	-24.0979	-26.6055
3.16768	-24.3323	-26.8502
3.20935	-24.4444	-26.9827
3.25102	-24.6075	-27.1254
3.29268	-24.791	-27.3293
3.33435	-25.0051	-27.5331
3.37602	-25.1784	-27.7064
3.41768	-25.3109	-27.8287
3.45935	-25.4434	-27.9715
3.50102	-25.6677	-28.1957
3.54268	-25.8308	-28.3588
3.58435	-25.9735	-28.5117
3.62602	-26.1774	-28.7054
3.66768	-26.2691	-28.787
3.70935	-26.4526	-28.9602
3.75102	-26.6055	-29.1335
3.79268	-26.8094	-29.317
3.83435	-26.9623	-29.3986
3.87602	-27.0846	-29.6126
3.91768	-27.2477	-29.7757
3.95935	-27.3394	-29.8777
4.00102	-27.5229	-30.051
4.04268	-27.7574	-30.2854
4.08435	-27.9613	-30.4893
4.12602	-28.1855	-30.6932
4.16768	-28.3894	-30.9072
4.20935	-28.5729	-31.1009
4.25102	-28.7768	-31.3048
4.29268	-28.9501	-31.4781
4.33435	-29.0826	-31.5902
4.37602	-29.2762	-31.8145
4.41768	-29.4801	-31.998
4.45935	-29.6432	-32.1814
4.50102	-29.8471	-32.3751
4.54268	-30.0408	-32.5688
4.58435	-30.265	-32.7931
4.62602	-30.4281	-32.9664
4.66768	-30.5199	-33.0887
4.70935	-30.7951	-33.3333
4.75102	-31.0296	-33.5678
4.79268	-31.1825	-33.7513
4.83435	-31.2538	-33.8124
4.87602	-31.6106	-34.159
4.91768	-31.947	-34.4648
4.95935	-32.2018	-34.7401
5.00102	-32.5688	-35.0968
5.04268	-32.8848	-35.4332
5.08435	-33.1702	-35.7085
5.12602	-33.527	-36.0449
5.16768	-33.629	-36.1672
5.20935	-34.0877	-36.6361
5.25102	-34.4139	-36.9623
5.29268	-34.7197	-37.2885
5.33435	-35.0255	-37.5739
5.37602	-35.3211	-37.8797
5.41768	-35.6167	-38.1753
5.45935	-35.9225	-38.4811
5.50102	-36.208	-38.7462
5.54268	-36.5138	-39.0724
5.58435	-36.7482	-39.317
5.62602	-36.9623	-39.5311
5.66768	-37.2069	-39.7655
5.70935	-37.4822	-40.0408
5.75102	-37.7778	-40.367
5.79268	-38.053	-40.6218
5.83435	-38.3486	-40.9174
5.87602	-38.6646	-41.2232
5.91768	-39.0112	-41.58
5.95935	-39.4393	-42.0183
6.00102	-39.8063	-42.3649
6.04268	-39.9796	-42.528
6.08435	-40.367	-42.9256
6.12602	-40.8767	-43.4251
6.16768	-41.3252	-43.8634
6.20935	-41.7533	-44.2915
6.25102	-42.1916	-44.7503
6.29268	-42.6504	-45.1988
6.33435	-43.0581	-45.6167
6.37602	-43.4964	-46.0449
6.41768	-43.894	-46.4526
6.45935	-44.2406	-46.8094
6.50102	-44.6483	-47.2069
6.54268	-45.0255	-47.5841
6.58435	-45.4027	-47.9613
6.62602	-45.8206	-48.3792
6.66768	-46.2385	-48.8073
6.70935	-46.6259	-49.2049
6.75102	-46.9011	-49.4903
6.79268	-47.3394	-49.9388
6.83435	-47.7574	-50.3466
6.87602	-48.2365	-50.8359
6.91768	-48.6748	-51.2844
6.95935	-49.1539	-51.7533
7.00102	-49.6126	-52.2222
7.04268	-50.1223	-52.7217
7.08435	-50.683	-53.2824
7.12602	-51.2232	-53.8226
7.16768	-51.7023	-54.3425
7.20935	-52.2936	-54.9032
7.25102	-52.8746	-55.4944
7.29268	-53.4557	-56.0754
7.33435	-54.0265	-56.6361
7.37602	-54.6483	-57.2477
7.41768	-55.2599	-57.8797
7.45935	-55.8919	-58.5117
7.50102	-56.5443	-59.1641
7.54268	-57.2681	-59.8777
7.58435	-57.8491	-60.4587
7.62602	-58.4404	-61.0601
7.66768	-59.0622	-61.6922
7.70935	-59.7655	-62.4159
7.75102	-60.4587	-63.0887
7.79268	-61.1213	-63.7513
7.83435	-61.8145	-64.4343
7.87602	-62.4669	-65.107
7.91768	-63.2416	-65.8716
7.95935	-64.0163	-66.6565
8.00102	-64.7808	-67.4414
8.04268	-65.6065	-68.2467
8.08435	-66.422	-69.0826
8.12602	-67.2477	-69.9083
8.16768	-68.1142	-70.7543
8.20935	-68.9806	-71.6412
8.25102	-69.8675	-72.5382
8.29268	-70.7543	-73.4251
8.33435	-71.6922	-74.3629
8.37602	-72.6198	-75.2701
8.41768	-73.5168	-76.1876
8.45935	-74.3731	-77.054
8.50102	-75.1988	-77.8899
8.54268	-76.1264	-78.8277
8.58435	-77.0642	-79.7452
8.62602	-77.6758	-80.3262
8.66768	-78.8175	-81.4577
8.70935	-80.0612	-82.7829
8.75102	-81.2029	-83.8634
8.79268	-82.2528	-84.9235
8.83435	-83.3231	-85.9939
8.87602	-84.3017	-86.9827
8.91768	-85.5148	-88.1549
8.95935	-86.6055	-89.2762
9.00102	-87.7064	-90.3976
9.04268	-88.8277	-91.5087
9.08435	-90.0714	-92.7523
9.12602	-91.2742	-93.9653
9.16768	-92.4669	-95.1784
9.20935	-93.6697	-96.3812
9.25102	-94.9439	-97.6555
9.29268	-96.2487	-98.9602
9.33435	-97.5229	-100.255
9.37602	-98.8583	-101.59
9.41768	-100.143	-102.885
9.45935	-101.427	-104.169
9.50102	-102.762	-105.484
9.54268	-104.088	-106.809
9.58435	-105.372	-108.073
9.62602	-106.504	-109.286
9.66768	-107.655	-110.438
9.70935	-108.858	-111.549
9.75102	-110.204	-113.028
9.79268	-111.549	-114.373
9.83435	-112.864	-115.678
9.87602	-114.21	-117.034
9.91768	-115.596	-118.44
9.95935	-116.809	-119.715
10.001	-118.328	-121.254
10.0427	-119.715	-122.701
10.0844	-121.284	-124.251
10.126	-122.936	-125.923
10.1677	-124.495	-127.472
10.2094	-126.004	-129.001
10.251	-127.533	-130.53
10.2927	-129.001	-132.008
10.3344	-130.449	-133.486
10.376	-131.937	-134.975
10.4177	-133.394	-136.504
10.4594	-134.873	-137.982
10.501	-136.371	-139.501
10.5427	-137.788	-140.948
10.5844	-139.205	-142.426
10.626	-140.622	-143.568
10.6677	-142.059	-145.046
10.7094	-143.394	-146.412
10.751	-144.913	-147.88
10.7927	-146.32	-149.317
10.8344	-147.666	-150.683
10.876	-148.93	-151.978
10.9177	-150.214	-153.282
10.9594	-151.631	-154.383
11.001	-152.977	-155.678
11.0427	-154.271	-156.962
11.0844	-155.586	-158.287
11.126	-156.871	-159.613
11.1677	-158.084	-160.866
11.2094	-159.307	-162.141
11.251	-160.398	-163.282
11.2927	-161.56	-164.455
11.3344	-162.691	-165.596
11.376	-163.884	-166.871
11.4177	-164.934	-167.941
11.4594	-166.014	-169.103
11.501	-167.074	-170.214
11.5427	-168.094	-171.121
11.5844	-168.879	-172.263
11.626	-169.317	-173.17
11.6677	-170.418	-174.261
11.7094	-171.182	-175.076
11.751	-171.998	-176.239
11.7927	-173.394	-177.717
11.8344	-174.669	-179.205
11.876	-175.882	-180.561
11.9177	-177.064	-181.947
11.9594	-178.196	-183.201
12.001	-179.174	-184.322
12.0427	-180.275	-185.484
12.0844	-181.335	-186.504
12.126	-182.416	-187.747
12.1677	-183.354	-188.94
12.2094	-184.393	-190.122
12.251	-185.413	-191.284
12.2927	-186.381	-192.497
12.3344	-187.36	-193.7
12.376	-188.328	-194.903
12.4177	-189.307	-196.126
12.4594	-190.234	-197.319
12.501	-191.233	-198.614
12.5427	-192.253	-199.786
12.5844	-193.099	-200.754
12.626	-193.863	-201.886
12.6677	-194.944	-203.17
12.7094	-195.902	-204.444
12.751	-196.952	-205.708
12.7927	-197.971	-207.013
12.8344	-198.95	-208.369
12.876	-199.99	-209.745
12.9177	-201.05	-211.07
12.9594	-202.243	-212.844
13.001	-203.405	-214.455
13.0427	-204.638	-215.647
13.0844	-205.831	-217.268
13.126	-206.952	-218.777
13.1677	-208.287	-220.489
13.2094	-209.388	-221.886
13.251	-210.581	-223.792
13.2927	-211.764	-225.382
13.3344	-212.854	-227.156
13.376	-214.108	-229.032
13.4177	-215.423	-230.846
13.4594	-216.3	-232.559
13.501	-217.462	-234.557
13.5427	-218.644	-236.575
13.5844	-219.939	-238.573
13.626	-221.142	-240.734
13.6677	-222.202	-242.1
13.7094	-224.027	-244.404
13.751	-225.464	-246.809
13.7927	-226.962	-249.174
13.8344	-228.471	-251.59
13.876	-229.98	-254.22
13.9177	-231.519	-256.769
13.9594	-233.129	-259.521
14.001	-234.873	-262.334
14.0427	-236.799	-265.403
14.0844	-239.704	-268.145
14.126	-241.764	-271.764
14.1677	-243.812	-274.873
14.2094	-245.739	-278.481
14.251	-247.992	-282.436
14.2927	-250.326	-286.065
14.3344	-252.049	-289.959
14.376	-254.832	-293.782
14.4177	-257.187	-298.002
14.4594	-259.827	-302.671
14.501	-262.416	-307.136
14.5427	-265.199	-312.232
14.5844	-268.063	-317.146
14.626	-267.197	-314.924
14.6677	-276.504	-327.462
14.7094	-280.632	-334.444
14.751	-283.843	-340.438
14.7927	-287.095	-347.472
14.8344	-290.53	-354.444
14.876	-293.7	-361.101
14.9177	-298.053	-368.624
14.9594	-302.62	-376.677
15.001	-307.105	-384.791
15.0427	-311.305	-392.396
15.0844	-315.759	-400.133
15.126	-320.754	-409.531
15.1677	-325.963	-418.889
15.2094	-331.641	-428.593
15.251	-337.36	-438.552
15.2927	-343.935	-449.134
15.3344	-351.305	-460.112
15.376	-358.257	-471.56
15.4177	-366.045	-483.456
15.4594	-373.792	-493.976
15.501	-380.989	-509.297
15.5427	-389.093	-522.762
15.5844	-398.216	-536.34
15.626	-407.299	-550.836
15.6677	-417.554	-565.443
15.7094	-428.542	-580.999
15.751	-439.317	-596.646
15.7927	-451.081	-615.79
15.8344	-464.373	-634.22
15.876	-477.309	-653.231
15.9177	-490.693	-673.058
15.9594	-503.782	-691.804
16.001	-518.583	-712.497
16.0427	-533.466	-735.025
16.0844	-548.909	-757.696
16.126	-566.279	-782.946
16.1677	-577.105	-808.97
16.2094	-602.813	-835.484
16.251	-621.978	-862.1
16.2927	-641.651	-892.508
16.3344	-662.691	-922.742
16.376	-687.054
16.4177	-712.08
16.4594	-735.902
16.501	-764.2
16.5427	-792.11
16.5844	-821.121
16.626	-854.444
16.6677	-886.035
16.7094	-916.809
16.7371	-952.63

## Sheet: HYDRUS
Data für die Zielfunktion: 2 x Tensionen, 1 x Endwassergehalt					Verdunstungsrate
Time	Obs	Type	Pos	Weight	Zeitintervall		Evarate [cm/d]			Type	1-Tension	2-Wassergehalt
0.00272624	-3.80224	1	2	1	0.742024	0	0.407904			Pos	1-top	2-bot	(von oben nach unten)
0.0443929	-4.26096	1	2	1	1.07119	0	0.378809			34	Time-Variable boundary conditions+
0.0860596	-3.70031	1	2	1	1.63853	0	0.36195			21.092	Final Time	Time Information
0.127726	-4.53619	1	2	1	1.98375	0	0.302189			850	Number of Data Points in Objective Function
0.169393	-6.36086	1	2	1	2.21292	0	0.291808		Interpolated Values	-5.19535	BC-top	[hPa]
0.21106	-7.67584	1	2	1	2.74345	0	0.293593			-3.94535	MP_top_ini	[hPa]	1
0.252726	-8.85831	1	2	1	2.97895	0	0.305806			-0.940528	MP_bot_ini	[hPa]	2
0.294393	-9.98981	1	2	1	3.63783	0	0.313227			0.309472	BC-bot	[hPa]
0.33606	-10.9378	1	2	1	3.97294	0	0.308229
0.377726	-11.8451	1	2	1	4.65957	0	0.299971
0.419393	-12.5994	1	2	1	5.16298	0	0.322082
0.46106	-12.5688	1	2	1	5.63697	0	0.312121		Real Values	-7.31524	BC-top	[cm]
0.502726	-10.1019	1	2	1	6.08174	0	0.297003			-6.06524	MP_top_ini	[cm]
0.544393	-11.1213	1	2	1	6.73464	0	0.284268			-3.45566	MP_bot_ini	[cm]
0.58606	-12.0693	1	2	1	7.85522	0	0.252111			-2.20566	BC-bot	[cm]
0.627726	-12.2222	1	2	1	8.62381	0	0.249239
0.669393	-12.8236	1	2	1	9.59743	0	0.250223
0.71106	-13.2926	1	2	1	9.933	0	0.2189
0.752726	-12.6096	1	2	1	10.5866	0	0.226969
0.794393	-13.6799	1	2	1	10.9428	0	0.224759
0.83606	-14.0571	1	2	1	11.5976	0	0.225277
0.877726	-14.3119	1	2	1	11.9716	0	0.263539
0.919393	-14.6483	1	2	1	12.591	0	0.251134
0.96106	-14.5566	1	2	1	13.0146	0	0.247759
1.00273	-15.0459	1	2	1	13.6533	0	0.247729
1.04439	-15.474	1	2	1	14.0484	0	0.224457
1.08606	-15.6575	1	2	1	14.6132	0	0.204016
1.12773	-15.9327	1	2	1	16.7389	0	0.153227
1.16939	-16.3507	1	2	1	17.8591	0	0.101951
1.21106	-15.4944	1	2	1	18.7488	0	0.0807059
1.25273	-16.6769	1	2	1	19.0024	0	0.069794
1.29439	-17.0133	1	2	1	19.6491	0	0.0636338
1.33606	-17.421	1	2	1	20.6498	0	0.0516116
1.37773	-17.4618	1	2	1	21.092	0	0.0382835
1.41939	-17.7676	1	2	1
1.46106	-17.7778	1	2	1
1.50273	-18.1244	1	2	1
1.54439	-18.3588	1	2	1
1.58606	-18.5015	1	2	1
1.62773	-18.5831	1	2	1
1.66939	-18.6952	1	2	1
1.71106	-18.8685	1	2	1
1.75273	-19.001	1	2	1
1.79268	-19.1743	1	2	1
1.79685	-19.1641	1	2	1
1.80102	-19.2457	1	2	1
1.80518	-19.2355	1	2	1
1.80935	-19.2661	1	2	1
1.81352	-19.2762	1	2	1
1.81768	-19.2864	1	2	1
1.82185	-19.3272	1	2	1
1.82602	-19.3476	1	2	1
1.83018	-19.3986	1	2	1
1.83435	-19.3884	1	2	1
1.87602	-19.6432	1	2	1
1.91768	-19.8573	1	2	1
1.95935	-20.0204	1	2	1
2.00102	-20.1019	1	2	1
2.04268	-20.1121	1	2	1
2.08435	-20.4689	1	2	1
2.12602	-20.6218	1	2	1
2.16768	-20.8665	1	2	1
2.20935	-21.0398	1	2	1
2.25102	-21.1009	1	2	1
2.29268	-21.3354	1	2	1
2.33435	-21.5087	1	2	1
2.37602	-20.4587	1	2	1
2.41768	-21.2844	1	2	1
2.45935	-21.6208	1	2	1
2.50102	-21.5902	1	2	1
2.54268	-21.8145	1	2	1
2.58435	-22.0387	1	2	1
2.62602	-22.212	1	2	1
2.66768	-22.2834	1	2	1
2.70935	-22.4465	1	2	1
2.75102	-22.0489	1	2	1
2.79268	-22.7013	1	2	1
2.83435	-22.9052	1	2	1
2.87602	-23.0071	1	2	1
2.91768	-23.2416	1	2	1
2.95935	-22.9562	1	2	1
3.00102	-23.4455	1	2	1
3.04268	-23.6799	1	2	1
3.08435	-23.945	1	2	1
3.12602	-24.0979	1	2	1
3.16768	-24.3323	1	2	1
3.20935	-24.4444	1	2	1
3.25102	-24.6075	1	2	1
3.29268	-24.791	1	2	1
3.33435	-25.0051	1	2	1
3.37602	-25.1784	1	2	1
3.41768	-25.3109	1	2	1
3.45935	-25.4434	1	2	1
3.50102	-25.6677	1	2	1
3.54268	-25.8308	1	2	1
3.58435	-25.9735	1	2	1
3.62602	-26.1774	1	2	1
3.66768	-26.2691	1	2	1
3.70935	-26.4526	1	2	1
3.75102	-26.6055	1	2	1
3.79268	-26.8094	1	2	1
3.83435	-26.9623	1	2	1
3.87602	-27.0846	1	2	1
3.91768	-27.2477	1	2	1
3.95935	-27.3394	1	2	1
4.00102	-27.5229	1	2	1
4.04268	-27.7574	1	2	1
4.08435	-27.9613	1	2	1
4.12602	-28.1855	1	2	1
4.16768	-28.3894	1	2	1
4.20935	-28.5729	1	2	1
4.25102	-28.7768	1	2	1
4.29268	-28.9501	1	2	1
4.33435	-29.0826	1	2	1
4.37602	-29.2762	1	2	1
4.41768	-29.4801	1	2	1
4.45935	-29.6432	1	2	1
4.50102	-29.8471	1	2	1
4.54268	-30.0408	1	2	1
4.58435	-30.265	1	2	1
4.62602	-30.4281	1	2	1
4.66768	-30.5199	1	2	1
4.70935	-30.7951	1	2	1
4.75102	-31.0296	1	2	1
4.79268	-31.1825	1	2	1
4.83435	-31.2538	1	2	1
4.87602	-31.6106	1	2	1
4.91768	-31.947	1	2	1
4.95935	-32.2018	1	2	1
5.00102	-32.5688	1	2	1
5.04268	-32.8848	1	2	1
5.08435	-33.1702	1	2	1
5.12602	-33.527	1	2	1
5.16768	-33.629	1	2	1
5.20935	-34.0877	1	2	1
5.25102	-34.4139	1	2	1
5.29268	-34.7197	1	2	1
5.33435	-35.0255	1	2	1
5.37602	-35.3211	1	2	1
5.41768	-35.6167	1	2	1
5.45935	-35.9225	1	2	1
5.50102	-36.208	1	2	1
5.54268	-36.5138	1	2	1
5.58435	-36.7482	1	2	1
5.62602	-36.9623	1	2	1
5.66768	-37.2069	1	2	1
5.70935	-37.4822	1	2	1
5.75102	-37.7778	1	2	1
5.79268	-38.053	1	2	1
5.83435	-38.3486	1	2	1
5.87602	-38.6646	1	2	1
5.91768	-39.0112	1	2	1
5.95935	-39.4393	1	2	1
6.00102	-39.8063	1	2	1
6.04268	-39.9796	1	2	1
6.08435	-40.367	1	2	1
6.12602	-40.8767	1	2	1
6.16768	-41.3252	1	2	1
6.20935	-41.7533	1	2	1
6.25102	-42.1916	1	2	1
6.29268	-42.6504	1	2	1
6.33435	-43.0581	1	2	1
6.37602	-43.4964	1	2	1
6.41768	-43.894	1	2	1
6.45935	-44.2406	1	2	1
6.50102	-44.6483	1	2	1
6.54268	-45.0255	1	2	1
6.58435	-45.4027	1	2	1
6.62602	-45.8206	1	2	1
6.66768	-46.2385	1	2	1
6.70935	-46.6259	1	2	1
6.75102	-46.9011	1	2	1
6.79268	-47.3394	1	2	1
6.83435	-47.7574	1	2	1
6.87602	-48.2365	1	2	1
6.91768	-48.6748	1	2	1
6.95935	-49.1539	1	2	1
7.00102	-49.6126	1	2	1
7.04268	-50.1223	1	2	1
7.08435	-50.683	1	2	1
7.12602	-51.2232	1	2	1
7.16768	-51.7023	1	2	1
7.20935	-52.2936	1	2	1
7.25102	-52.8746	1	2	1
7.29268	-53.4557	1	2	1
7.33435	-54.0265	1	2	1
7.37602	-54.6483	1	2	1
7.41768	-55.2599	1	2	1
7.45935	-55.8919	1	2	1
7.50102	-56.5443	1	2	1
7.54268	-57.2681	1	2	1
7.58435	-57.8491	1	2	1
7.62602	-58.4404	1	2	1
7.66768	-59.0622	1	2	1
7.70935	-59.7655	1	2	1
7.75102	-60.4587	1	2	1
7.79268	-61.1213	1	2	1
7.83435	-61.8145	1	2	1
7.87602	-62.4669	1	2	1
7.91768	-63.2416	1	2	1
7.95935	-64.0163	1	2	1
8.00102	-64.7808	1	2	1
8.04268	-65.6065	1	2	1
8.08435	-66.422	1	2	1
8.12602	-67.2477	1	2	1
8.16768	-68.1142	1	2	1
8.20935	-68.9806	1	2	1
8.25102	-69.8675	1	2	1
8.29268	-70.7543	1	2	1
8.33435	-71.6922	1	2	1
8.37602	-72.6198	1	2	1
8.41768	-73.5168	1	2	1
8.45935	-74.3731	1	2	1
8.50102	-75.1988	1	2	1
8.54268	-76.1264	1	2	1
8.58435	-77.0642	1	2	1
8.62602	-77.6758	1	2	1
8.66768	-78.8175	1	2	1
8.70935	-80.0612	1	2	1
8.75102	-81.2029	1	2	1
8.79268	-82.2528	1	2	1
8.83435	-83.3231	1	2	1
8.87602	-84.3017	1	2	1
8.91768	-85.5148	1	2	1
8.95935	-86.6055	1	2	1
9.00102	-87.7064	1	2	1
9.04268	-88.8277	1	2	1
9.08435	-90.0714	1	2	1
9.12602	-91.2742	1	2	1
9.16768	-92.4669	1	2	1
9.20935	-93.6697	1	2	1
9.25102	-94.9439	1	2	1
9.29268	-96.2487	1	2	1
9.33435	-97.5229	1	2	1
9.37602	-98.8583	1	2	1
9.41768	-100.143	1	2	1
9.45935	-101.427	1	2	1
9.50102	-102.762	1	2	1
9.54268	-104.088	1	2	1
9.58435	-105.372	1	2	1
9.62602	-106.504	1	2	1
9.66768	-107.655	1	2	1
9.70935	-108.858	1	2	1
9.75102	-110.204	1	2	1
9.79268	-111.549	1	2	1
9.83435	-112.864	1	2	1
9.87602	-114.21	1	2	1
9.91768	-115.596	1	2	1
9.95935	-116.809	1	2	1
10.001	-118.328	1	2	1
10.0427	-119.715	1	2	1
10.0844	-121.284	1	2	1
10.126	-122.936	1	2	1
10.1677	-124.495	1	2	1
10.2094	-126.004	1	2	1
10.251	-127.533	1	2	1
10.2927	-129.001	1	2	1
10.3344	-130.449	1	2	1
10.376	-131.937	1	2	1
10.4177	-133.394	1	2	1
10.4594	-134.873	1	2	1
10.501	-136.371	1	2	1
10.5427	-137.788	1	2	1
10.5844	-139.205	1	2	1
10.626	-140.622	1	2	1
10.6677	-142.059	1	2	1
10.7094	-143.394	1	2	1
10.751	-144.913	1	2	1
10.7927	-146.32	1	2	1
10.8344	-147.666	1	2	1
10.876	-148.93	1	2	1
10.9177	-150.214	1	2	1
10.9594	-151.631	1	2	1
11.001	-152.977	1	2	1
11.0427	-154.271	1	2	1
11.0844	-155.586	1	2	1
11.126	-156.871	1	2	1
11.1677	-158.084	1	2	1
11.2094	-159.307	1	2	1
11.251	-160.398	1	2	1
11.2927	-161.56	1	2	1
11.3344	-162.691	1	2	1
11.376	-163.884	1	2	1
11.4177	-164.934	1	2	1
11.4594	-166.014	1	2	1
11.501	-167.074	1	2	1
11.5427	-168.094	1	2	1
11.5844	-168.879	1	2	1
11.626	-169.317	1	2	1
11.6677	-170.418	1	2	1
11.7094	-171.182	1	2	1
11.751	-171.998	1	2	1
11.7927	-173.394	1	2	1
11.8344	-174.669	1	2	1
11.876	-175.882	1	2	1
11.9177	-177.064	1	2	1
11.9594	-178.196	1	2	1
12.001	-179.174	1	2	1
12.0427	-180.275	1	2	1
12.0844	-181.335	1	2	1
12.126	-182.416	1	2	1
12.1677	-183.354	1	2	1
12.2094	-184.393	1	2	1
12.251	-185.413	1	2	1
12.2927	-186.381	1	2	1
12.3344	-187.36	1	2	1
12.376	-188.328	1	2	1
12.4177	-189.307	1	2	1
12.4594	-190.234	1	2	1
12.501	-191.233	1	2	1
12.5427	-192.253	1	2	1
12.5844	-193.099	1	2	1
12.626	-193.863	1	2	1
12.6677	-194.944	1	2	1
12.7094	-195.902	1	2	1
12.751	-196.952	1	2	1
12.7927	-197.971	1	2	1
12.8344	-198.95	1	2	1
12.876	-199.99	1	2	1
12.9177	-201.05	1	2	1
12.9594	-202.243	1	2	1
13.001	-203.405	1	2	1
13.0427	-204.638	1	2	1
13.0844	-205.831	1	2	1
13.126	-206.952	1	2	1
13.1677	-208.287	1	2	1
13.2094	-209.388	1	2	1
13.251	-210.581	1	2	1
13.2927	-211.764	1	2	1
13.3344	-212.854	1	2	1
13.376	-214.108	1	2	1
13.4177	-215.423	1	2	1
13.4594	-216.3	1	2	1
13.501	-217.462	1	2	1
13.5427	-218.644	1	2	1
13.5844	-219.939	1	2	1
13.626	-221.142	1	2	1
13.6677	-222.202	1	2	1
13.7094	-224.027	1	2	1
13.751	-225.464	1	2	1
13.7927	-226.962	1	2	1
13.8344	-228.471	1	2	1
13.876	-229.98	1	2	1
13.9177	-231.519	1	2	1
13.9594	-233.129	1	2	1
14.001	-234.873	1	2	1
14.0427	-236.799	1	2	1
14.0844	-239.704	1	2	1
14.126	-241.764	1	2	1
14.1677	-243.812	1	2	1
14.2094	-245.739	1	2	1
14.251	-247.992	1	2	1
14.2927	-250.326	1	2	1
14.3344	-252.049	1	2	1
14.376	-254.832	1	2	1
14.4177	-257.187	1	2	1
14.4594	-259.827	1	2	1
14.501	-262.416	1	2	1
14.5427	-265.199	1	2	1
14.5844	-268.063	1	2	1
14.626	-267.197	1	2	1
14.6677	-276.504	1	2	1
14.7094	-280.632	1	2	1
14.751	-283.843	1	2	1
14.7927	-287.095	1	2	1
14.8344	-290.53	1	2	1
14.876	-293.7	1	2	1
14.9177	-298.053	1	2	1
14.9594	-302.62	1	2	1
15.001	-307.105	1	2	1
15.0427	-311.305	1	2	1
15.0844	-315.759	1	2	1
15.126	-320.754	1	2	1
15.1677	-325.963	1	2	1
15.2094	-331.641	1	2	1
15.251	-337.36	1	2	1
15.2927	-343.935	1	2	1
15.3344	-351.305	1	2	1
15.376	-358.257	1	2	1
15.4177	-366.045	1	2	1
15.4594	-373.792	1	2	1
15.501	-380.989	1	2	1
15.5427	-389.093	1	2	1
15.5844	-398.216	1	2	1
15.626	-407.299	1	2	1
15.6677	-417.554	1	2	1
15.7094	-428.542	1	2	1
15.751	-439.317	1	2	1
15.7927	-451.081	1	2	1
15.8344	-464.373	1	2	1
15.876	-477.309	1	2	1
15.9177	-490.693	1	2	1
15.9594	-503.782	1	2	1
16.001	-518.583	1	2	1
16.0427	-533.466	1	2	1
16.0844	-548.909	1	2	1
16.126	-566.279	1	2	1
16.1677	-577.105	1	2	1
16.2094	-602.813	1	2	1
16.251	-621.978	1	2	1
16.2927	-641.651	1	2	1
16.3344	-662.691	1	2	1
16.376	-687.054	1	2	1
16.4177	-712.08	1	2	1
16.4594	-735.902	1	2	1
16.501	-764.2	1	2	1
16.5427	-792.11	1	2	1
16.5844	-821.121	1	2	1
16.626	-854.444	1	2	1
16.6677	-886.035	1	2	1
16.7094	-916.809	1	2	1
16.7371	-952.63	1	2	1
21.008	-8970.44	1	2	1
0.00272624	-6.43221	1	1	1
0.0443929	-6.82977	1	1	1
0.0860596	-6.2895	1	1	1
0.127726	-7.11519	1	1	1
0.169393	-8.92966	1	1	1
0.21106	-10.265	1	1	1
0.252726	-11.4475	1	1	1
0.294393	-12.5688	1	1	1
0.33606	-13.5168	1	1	1
0.377726	-14.4037	1	1	1
0.419393	-15.1682	1	1	1
0.46106	-15.1376	1	1	1
0.502726	-12.6707	1	1	1
0.544393	-13.6799	1	1	1
0.58606	-14.6381	1	1	1
0.627726	-14.8114	1	1	1
0.669393	-15.4128	1	1	1
0.71106	-15.8512	1	1	1
0.752726	-15.1682	1	1	1
0.794393	-16.2385	1	1	1
0.83606	-16.5851	1	1	1
0.877726	-16.8705	1	1	1
0.919393	-17.1967	1	1	1
0.96106	-17.0846	1	1	1
1.00273	-17.6045	1	1	1
1.04439	-18.0122	1	1	1
1.08606	-18.1855	1	1	1
1.12773	-18.4709	1	1	1
1.16939	-18.8787	1	1	1
1.21106	-18.0224	1	1	1
1.25273	-19.2151	1	1	1
1.29439	-19.5617	1	1	1
1.33606	-19.949	1	1	1
1.37773	-20	1	1	1
1.41939	-20.3058	1	1	1
1.46106	-20.3364	1	1	1
1.50273	-20.6626	1	1	1
1.54439	-20.9072	1	1	1
1.58606	-21.0398	1	1	1
1.62773	-21.1213	1	1	1
1.66939	-21.2334	1	1	1
1.71106	-21.4067	1	1	1
1.75273	-21.5087	1	1	1
1.79268	-21.7125	1	1	1
1.79685	-21.7227	1	1	1
1.80102	-21.7737	1	1	1
1.80518	-21.7737	1	1	1
1.80935	-21.8145	1	1	1
1.81352	-21.8145	1	1	1
1.81768	-21.8247	1	1	1
1.82185	-21.8654	1	1	1
1.82602	-21.8756	1	1	1
1.83018	-21.9164	1	1	1
1.83435	-21.9368	1	1	1
1.87602	-22.1713	1	1	1
1.91768	-22.3751	1	1	1
1.95935	-22.5586	1	1	1
2.00102	-22.6606	1	1	1
2.04268	-22.6504	1	1	1
2.08435	-23.0173	1	1	1
2.12602	-23.1804	1	1	1
2.16768	-23.4149	1	1	1
2.20935	-23.578	1	1	1
2.25102	-23.6493	1	1	1
2.29268	-23.8838	1	1	1
2.33435	-24.0673	1	1	1
2.37602	-22.9969	1	1	1
2.41768	-23.8226	1	1	1
2.45935	-24.1692	1	1	1
2.50102	-24.1182	1	1	1
2.54268	-24.3629	1	1	1
2.58435	-24.5668	1	1	1
2.62602	-24.7604	1	1	1
2.66768	-24.8216	1	1	1
2.70935	-24.9949	1	1	1
2.75102	-24.6075	1	1	1
2.79268	-25.2497	1	1	1
2.83435	-25.4536	1	1	1
2.87602	-25.5657	1	1	1
2.91768	-25.7798	1	1	1
2.95935	-25.4842	1	1	1
3.00102	-25.9531	1	1	1
3.04268	-26.1978	1	1	1
3.08435	-26.4832	1	1	1
3.12602	-26.6055	1	1	1
3.16768	-26.8502	1	1	1
3.20935	-26.9827	1	1	1
3.25102	-27.1254	1	1	1
3.29268	-27.3293	1	1	1
3.33435	-27.5331	1	1	1
3.37602	-27.7064	1	1	1
3.41768	-27.8287	1	1	1
3.45935	-27.9715	1	1	1
3.50102	-28.1957	1	1	1
3.54268	-28.3588	1	1	1
3.58435	-28.5117	1	1	1
3.62602	-28.7054	1	1	1
3.66768	-28.787	1	1	1
3.70935	-28.9602	1	1	1
3.75102	-29.1335	1	1	1
3.79268	-29.317	1	1	1
3.83435	-29.3986	1	1	1
3.87602	-29.6126	1	1	1
3.91768	-29.7757	1	1	1
3.95935	-29.8777	1	1	1
4.00102	-30.051	1	1	1
4.04268	-30.2854	1	1	1
4.08435	-30.4893	1	1	1
4.12602	-30.6932	1	1	1
4.16768	-30.9072	1	1	1
4.20935	-31.1009	1	1	1
4.25102	-31.3048	1	1	1
4.29268	-31.4781	1	1	1
4.33435	-31.5902	1	1	1
4.37602	-31.8145	1	1	1
4.41768	-31.998	1	1	1
4.45935	-32.1814	1	1	1
4.50102	-32.3751	1	1	1
4.54268	-32.5688	1	1	1
4.58435	-32.7931	1	1	1
4.62602	-32.9664	1	1	1
4.66768	-33.0887	1	1	1
4.70935	-33.3333	1	1	1
4.75102	-33.5678	1	1	1
4.79268	-33.7513	1	1	1
4.83435	-33.8124	1	1	1
4.87602	-34.159	1	1	1
4.91768	-34.4648	1	1	1
4.95935	-34.7401	1	1	1
5.00102	-35.0968	1	1	1
5.04268	-35.4332	1	1	1
5.08435	-35.7085	1	1	1
5.12602	-36.0449	1	1	1
5.16768	-36.1672	1	1	1
5.20935	-36.6361	1	1	1
5.25102	-36.9623	1	1	1
5.29268	-37.2885	1	1	1
5.33435	-37.5739	1	1	1
5.37602	-37.8797	1	1	1
5.41768	-38.1753	1	1	1
5.45935	-38.4811	1	1	1
5.50102	-38.7462	1	1	1
5.54268	-39.0724	1	1	1
5.58435	-39.317	1	1	1
5.62602	-39.5311	1	1	1
5.66768	-39.7655	1	1	1
5.70935	-40.0408	1	1	1
5.75102	-40.367	1	1	1
5.79268	-40.6218	1	1	1
5.83435	-40.9174	1	1	1
5.87602	-41.2232	1	1	1
5.91768	-41.58	1	1	1
5.95935	-42.0183	1	1	1
6.00102	-42.3649	1	1	1
6.04268	-42.528	1	1	1
6.08435	-42.9256	1	1	1
6.12602	-43.4251	1	1	1
6.16768	-43.8634	1	1	1
6.20935	-44.2915	1	1	1
6.25102	-44.7503	1	1	1
6.29268	-45.1988	1	1	1
6.33435	-45.6167	1	1	1
6.37602	-46.0449	1	1	1
6.41768	-46.4526	1	1	1
6.45935	-46.8094	1	1	1
6.50102	-47.2069	1	1	1
6.54268	-47.5841	1	1	1
6.58435	-47.9613	1	1	1
6.62602	-48.3792	1	1	1
6.66768	-48.8073	1	1	1
6.70935	-49.2049	1	1	1
6.75102	-49.4903	1	1	1
6.79268	-49.9388	1	1	1
6.83435	-50.3466	1	1	1
6.87602	-50.8359	1	1	1
6.91768	-51.2844	1	1	1
6.95935	-51.7533	1	1	1
7.00102	-52.2222	1	1	1
7.04268	-52.7217	1	1	1
7.08435	-53.2824	1	1	1
7.12602	-53.8226	1	1	1
7.16768	-54.3425	1	1	1
7.20935	-54.9032	1	1	1
7.25102	-55.4944	1	1	1
7.29268	-56.0754	1	1	1
7.33435	-56.6361	1	1	1
7.37602	-57.2477	1	1	1
7.41768	-57.8797	1	1	1
7.45935	-58.5117	1	1	1
7.50102	-59.1641	1	1	1
7.54268	-59.8777	1	1	1
7.58435	-60.4587	1	1	1
7.62602	-61.0601	1	1	1
7.66768	-61.6922	1	1	1
7.70935	-62.4159	1	1	1
7.75102	-63.0887	1	1	1
7.79268	-63.7513	1	1	1
7.83435	-64.4343	1	1	1
7.87602	-65.107	1	1	1
7.91768	-65.8716	1	1	1
7.95935	-66.6565	1	1	1
8.00102	-67.4414	1	1	1
8.04268	-68.2467	1	1	1
8.08435	-69.0826	1	1	1
8.12602	-69.9083	1	1	1
8.16768	-70.7543	1	1	1
8.20935	-71.6412	1	1	1
8.25102	-72.5382	1	1	1
8.29268	-73.4251	1	1	1
8.33435	-74.3629	1	1	1
8.37602	-75.2701	1	1	1
8.41768	-76.1876	1	1	1
8.45935	-77.054	1	1	1
8.50102	-77.8899	1	1	1
8.54268	-78.8277	1	1	1
8.58435	-79.7452	1	1	1
8.62602	-80.3262	1	1	1
8.66768	-81.4577	1	1	1
8.70935	-82.7829	1	1	1
8.75102	-83.8634	1	1	1
8.79268	-84.9235	1	1	1
8.83435	-85.9939	1	1	1
8.87602	-86.9827	1	1	1
8.91768	-88.1549	1	1	1
8.95935	-89.2762	1	1	1
9.00102	-90.3976	1	1	1
9.04268	-91.5087	1	1	1
9.08435	-92.7523	1	1	1
9.12602	-93.9653	1	1	1
9.16768	-95.1784	1	1	1
9.20935	-96.3812	1	1	1
9.25102	-97.6555	1	1	1
9.29268	-98.9602	1	1	1
9.33435	-100.255	1	1	1
9.37602	-101.59	1	1	1
9.41768	-102.885	1	1	1
9.45935	-104.169	1	1	1
9.50102	-105.484	1	1	1
9.54268	-106.809	1	1	1
9.58435	-108.073	1	1	1
9.62602	-109.286	1	1	1
9.66768	-110.438	1	1	1
9.70935	-111.549	1	1	1
9.75102	-113.028	1	1	1
9.79268	-114.373	1	1	1
9.83435	-115.678	1	1	1
9.87602	-117.034	1	1	1
9.91768	-118.44	1	1	1
9.95935	-119.715	1	1	1
10.001	-121.254	1	1	1
10.0427	-122.701	1	1	1
10.0844	-124.251	1	1	1
10.126	-125.923	1	1	1
10.1677	-127.472	1	1	1
10.2094	-129.001	1	1	1
10.251	-130.53	1	1	1
10.2927	-132.008	1	1	1
10.3344	-133.486	1	1	1
10.376	-134.975	1	1	1
10.4177	-136.504	1	1	1
10.4594	-137.982	1	1	1
10.501	-139.501	1	1	1
10.5427	-140.948	1	1	1
10.5844	-142.426	1	1	1
10.626	-143.568	1	1	1
10.6677	-145.046	1	1	1
10.7094	-146.412	1	1	1
10.751	-147.88	1	1	1
10.7927	-149.317	1	1	1
10.8344	-150.683	1	1	1
10.876	-151.978	1	1	1
10.9177	-153.282	1	1	1
10.9594	-154.383	1	1	1
11.001	-155.678	1	1	1
11.0427	-156.962	1	1	1
11.0844	-158.287	1	1	1
11.126	-159.613	1	1	1
11.1677	-160.866	1	1	1
11.2094	-162.141	1	1	1
11.251	-163.282	1	1	1
11.2927	-164.455	1	1	1
11.3344	-165.596	1	1	1
11.376	-166.871	1	1	1
11.4177	-167.941	1	1	1
11.4594	-169.103	1	1	1
11.501	-170.214	1	1	1
11.5427	-171.121	1	1	1
11.5844	-172.263	1	1	1
11.626	-173.17	1	1	1
11.6677	-174.261	1	1	1
11.7094	-175.076	1	1	1
11.751	-176.239	1	1	1
11.7927	-177.717	1	1	1
11.8344	-179.205	1	1	1
11.876	-180.561	1	1	1
11.9177	-181.947	1	1	1
11.9594	-183.201	1	1	1
12.001	-184.322	1	1	1
12.0427	-185.484	1	1	1
12.0844	-186.504	1	1	1
12.126	-187.747	1	1	1
12.1677	-188.94	1	1	1
12.2094	-190.122	1	1	1
12.251	-191.284	1	1	1
12.2927	-192.497	1	1	1
12.3344	-193.7	1	1	1
12.376	-194.903	1	1	1
12.4177	-196.126	1	1	1
12.4594	-197.319	1	1	1
12.501	-198.614	1	1	1
12.5427	-199.786	1	1	1
12.5844	-200.754	1	1	1
12.626	-201.886	1	1	1
12.6677	-203.17	1	1	1
12.7094	-204.444	1	1	1
12.751	-205.708	1	1	1
12.7927	-207.013	1	1	1
12.8344	-208.369	1	1	1
12.876	-209.745	1	1	1
12.9177	-211.07	1	1	1
12.9594	-212.844	1	1	1
13.001	-214.455	1	1	1
13.0427	-215.647	1	1	1
13.0844	-217.268	1	1	1
13.126	-218.777	1	1	1
13.1677	-220.489	1	1	1
13.2094	-221.886	1	1	1
13.251	-223.792	1	1	1
13.2927	-225.382	1	1	1
13.3344	-227.156	1	1	1
13.376	-229.032	1	1	1
13.4177	-230.846	1	1	1
13.4594	-232.559	1	1	1
13.501	-234.557	1	1	1
13.5427	-236.575	1	1	1
13.5844	-238.573	1	1	1
13.626	-240.734	1	1	1
13.6677	-242.1	1	1	1
13.7094	-244.404	1	1	1
13.751	-246.809	1	1	1
13.7927	-249.174	1	1	1
13.8344	-251.59	1	1	1
13.876	-254.22	1	1	1
13.9177	-256.769	1	1	1
13.9594	-259.521	1	1	1
14.001	-262.334	1	1	1
14.0427	-265.403	1	1	1
14.0844	-268.145	1	1	1
14.126	-271.764	1	1	1
14.1677	-274.873	1	1	1
14.2094	-278.481	1	1	1
14.251	-282.436	1	1	1
14.2927	-286.065	1	1	1
14.3344	-289.959	1	1	1
14.376	-293.782	1	1	1
14.4177	-298.002	1	1	1
14.4594	-302.671	1	1	1
14.501	-307.136	1	1	1
14.5427	-312.232	1	1	1
14.5844	-317.146	1	1	1
14.626	-314.924	1	1	1
14.6677	-327.462	1	1	1
14.7094	-334.444	1	1	1
14.751	-340.438	1	1	1
14.7927	-347.472	1	1	1
14.8344	-354.444	1	1	1
14.876	-361.101	1	1	1
14.9177	-368.624	1	1	1
14.9594	-376.677	1	1	1
15.001	-384.791	1	1	1
15.0427	-392.396	1	1	1
15.0844	-400.133	1	1	1
15.126	-409.531	1	1	1
15.1677	-418.889	1	1	1
15.2094	-428.593	1	1	1
15.251	-438.552	1	1	1
15.2927	-449.134	1	1	1
15.3344	-460.112	1	1	1
15.376	-471.56	1	1	1
15.4177	-483.456	1	1	1
15.4594	-493.976	1	1	1
15.501	-509.297	1	1	1
15.5427	-522.762	1	1	1
15.5844	-536.34	1	1	1
15.626	-550.836	1	1	1
15.6677	-565.443	1	1	1
15.7094	-580.999	1	1	1
15.751	-596.646	1	1	1
15.7927	-615.79	1	1	1
15.8344	-634.22	1	1	1
15.876	-653.231	1	1	1
15.9177	-673.058	1	1	1
15.9594	-691.804	1	1	1
16.001	-712.497	1	1	1
16.0427	-735.025	1	1	1
16.0844	-757.696	1	1	1
16.126	-782.946	1	1	1
16.1677	-808.97	1	1	1
16.2094	-835.484	1	1	1
16.251	-862.1	1	1	1
16.2927	-892.508	1	1	1
16.3344	-922.742	1	1	1
19.008	-8970.44	1	1	1
0.742024	0.905021	2	0	100000
1.07119	0.880082	2	0	100000
1.63853	0.839012	2	0	100000
1.98375	0.818148	2	0	100000
2.21292	0.804774	2	0	100000
2.74345	0.773621	2	0	100000
2.97895	0.759218	2	0	100000
3.63783	0.717942	2	0	100000
3.97294	0.697284	2	0	100000
4.65957	0.656091	2	0	100000
5.16298	0.623663	2	0	100000
5.63697	0.594074	2	0	100000
6.08174	0.567654	2	0	100000
6.73464	0.530535	2	0	100000
7.85522	0.474033	2	0	100000
8.62381	0.43572	2	0	100000
9.59743	0.386996	2	0	100000
9.933	0.372305	2	0	100000
10.5866	0.342634	2	0	100000
10.9428	0.326626	2	0	100000
11.5976	0.297119	2	0	100000
11.9716	0.277407	2	0	100000
12.591	0.246296	2	0	100000
13.0146	0.225309	2	0	100000
13.6533	0.193663	2	0	100000
14.0484	0.175926	2	0	100000
14.6132	0.152881	2	0	100000
16.7389	0.0877366	2	0	100000
17.8591	0.0648971	2	0	100000
18.7488	0.050535	2	0	100000
19.0024	0.0469959	2	0	100000
19.6491	0.0387654	2	0	100000
20.6498	0.0284362	2	0	100000
21.0913	0.0250556	2	0	100000

## Sheet: tens_interpolation
		Datum / Zeit	Tension unten [hPa]	Tension oben [hPa]
m_bot	b_bot	2013-07-31 15:49:15	0.65	3.59
82.8	-3.43509e+06	2013-07-31 16:09:15	1.8	4.76
m_top	b_top	2013-07-31 15:53:59	0.921717	3.86644
84.24	-3.49483e+06	y = m*x+b
		AE unten [t]	AE oben [t]
		41227.2
			Brutto-Gewicht [g]	Netto-Gewicht [g]
-1.40314	58626.9	2013-08-23 17:58:52	382.99	12.72
		2013-08-24 10:54:53	382	11.73
-1.40314	58256.7	2013-08-24 06:49:00	382.24	11.9696
			AE unten
m_bot	b_bot	2012-12-29 09:42:51	385.06	19.16
-1.86058	77175.7	2012-12-31 12:24:29	381.13	15.23
m_top	b_top	2012-12-29 18:18:40	384.394	18.4935
-1.86058	76809.8	y = m*x+b
