# Supplementary material for: A pore-size classification for peat bogs derived from unsaturated hydraulic properties
Source: Copernicus journal article supplement (doi:10.5194/hess-21-6185-2017), 2017-12-07
Supplement: Supplementary file 25 [file A333_8_HYDRUS.xlsx]

## Sheet: Gewicht
Datum / Zeit	Brutto-Gewicht [g]	Netto-Gewicht [g]	Gewichtsänderung [g]	Zeit [d]	Theta [-]	Verdunstungsrate [cm/d]		Volumen	244
2012-12-08 18:06:12	613.99	246.59	0					Höhe	5
2012-12-09 11:55:04	600.47	233.07	-13.52	0.742269	0.910533	0.373247		A	48.8
2012-12-09 19:49:05	594.21	226.81	-19.78	1.07145	0.884877	0.389694		Theta0	0.965943
2012-12-10 09:26:06	584.02	216.62	-29.97	1.63882	0.843115	0.368032		Trockengewicht	10.9
2012-12-10 17:42:55	578.59	211.19	-35.4	1.98383	0.820861	0.322512		Ks (as in Ksat)
2012-12-10 23:13:10	575.11	207.71	-38.88	2.21317	0.806598	0.310942		delta System [g]	367.4
2012-12-11 11:57:26	566.88	199.48	-47.11	2.74391	0.772869	0.317759
2012-12-11 17:35:47	563.09	195.69	-50.9	2.97888	0.757336	0.330534
2012-12-12 09:26:11	552.12	184.72	-61.87	3.63888	0.712377	0.340599
2012-12-12 17:28:55	546.72	179.32	-67.27	3.97411	0.690246	0.330088
2012-12-13 09:57:54	536.01	168.61	-77.98	4.6609	0.646352	0.319553
2012-12-13 22:01:33	527.65	160.25	-86.34	5.16344	0.61209	0.340895
2012-12-14 09:24:10	520.07	152.67	-93.92	5.63748	0.581025	0.327669
2012-12-14 20:04:14	513.38	145.98	-100.61	6.08197	0.553607	0.308421
2012-12-15 11:45:40	503.79	136.39	-110.2	6.73574	0.514303	0.300588
2012-12-16 14:39:26	489.27	121.87	-124.72	7.85641	0.454795	0.265502
2012-12-17 09:04:45	479.45	112.05	-134.54	8.62399	0.414549	0.262161
2012-12-18 08:29:01	466.67	99.27	-147.32	9.59918	0.362172	0.268549
2012-12-18 16:30:03	462.74	95.34	-151.25	9.93323	0.346066	0.241079
2012-12-19 08:11:15	455.11	87.71	-158.88	10.5868	0.314795	0.239213
2012-12-19 16:44:08	450.84	83.44	-163.15	10.943	0.297295	0.24567
2012-12-20 08:27:02	443.25	75.85	-170.74	11.5978	0.266189	0.23753
2012-12-20 17:25:43	438.42	71.02	-175.57	11.9719	0.246393	0.26458
2012-12-21 08:17:38	430.88	63.48	-183.11	12.5913	0.215492	0.249454
2012-12-21 18:32:02	425.98	58.58	-188.01	13.0179	0.19541	0.235336
2012-12-22 09:48:36	419.49	52.09	-194.5	13.6544	0.168811	0.208941
2012-12-22 19:17:35	416.13	48.73	-197.86	14.0496	0.155041	0.174254
2012-12-23 08:49:36	412.01	44.61	-201.98	14.6135	0.138156	0.149718
2012-12-25 11:49:59	400.56	33.16	-213.43	16.7387	0.0912295	0.110401
2012-12-26 14:43:24	395.9	28.5	-218.09	17.8592	0.0721311	0.085228
2012-12-27 12:04:54	392.62	25.22	-221.37	18.7491	0.0586885	0.0755262
2012-12-27 18:11:15	391.76	24.36	-222.23	19.0035	0.0551639	0.06927
2012-12-28 09:42:47	389.57	22.17	-224.42	19.6504	0.0461885	0.0693727
2012-12-29 09:42:15	386.55	19.15	-227.44	20.65	0.0338115	0.0619082
2012-12-31 12:23:52	381.54	14.14	-232.45	22.7623	0.0132787	0.0486044

## Sheet: Tensionen
Datum / Zeit	Tension unten [hPa]	Tension oben [hPa]	Zeit [d]	MP bot(2) [cm]	MP top(1) [cm]		WÄGUNG START
2012-12-08 17:51:08	4.4	6.9	-0.0104597	-4.48522	-7.03364		41251.8	-7.45158
2012-12-08 17:52:08	4.42	6.92	-0.00976526	-4.50561	-7.05403		2012-12-08 18:06:12
2012-12-08 17:53:08	4.44	6.94	-0.00907082	-4.52599	-7.07441
2012-12-08 17:54:08	4.47	6.97	-0.00837637	-4.55657	-7.10499
2012-12-08 17:55:08	4.51	7.01	-0.00768193	-4.59735	-7.14577
2012-12-08 17:56:08	4.55	7.05	-0.00698749	-4.63812	-7.18654
2012-12-08 17:57:08	4.59	7.08	-0.00629304	-4.6789	-7.21713
2012-12-08 17:58:08	4.64	7.13	-0.0055986	-4.72987	-7.26809
2012-12-08 17:59:08	4.65	7.15	-0.00490415	-4.74006	-7.28848
2012-12-08 18:00:08	4.69	7.18	-0.00420971	-4.78084	-7.31906
2012-12-08 18:01:08	4.72	7.21	-0.00351526	-4.81142	-7.34964
2012-12-08 18:02:08	4.76	7.25	-0.00282082	-4.85219	-7.39042
2012-12-08 18:03:08	4.78	7.28	-0.00212637	-4.87258	-7.421
2012-12-08 18:04:08	4.82	7.31	-0.00143193	-4.91335	-7.45158
2012-12-08 18:06:08	4.2	7.03	-4.30411e-05	-4.28135	-7.16616
2012-12-08 18:07:08	4.26	6.75	0.000651403	-4.34251	-6.88073
2012-12-08 18:08:08	4.26	6.78	0.00134585	-4.34251	-6.91131
2012-12-08 18:09:08	4.28	6.79	0.00204029	-4.3629	-6.92151
2012-12-08 18:10:08	4.3	6.8	0.00273474	-4.38328	-6.9317
2012-12-08 18:11:08	4.34	6.8	0.00342918	-4.42406	-6.9317	2012-12-08 18:11:08
2012-12-08 18:12:08	4.36	6.85	0.00412363	-4.44444	-6.98267
2012-12-08 18:13:08	4.37	6.89	0.00481807	-4.45464	-7.02345
2012-12-08 18:14:08	4.41	6.91	0.00551251	-4.49541	-7.04383
2012-12-08 18:15:08	4.45	6.94	0.00620696	-4.53619	-7.07441
2012-12-08 18:16:08	4.49	6.97	0.0069014	-4.57696	-7.10499
2012-12-08 18:17:08	4.51	7	0.00759585	-4.59735	-7.13558
2012-12-08 18:18:08	4.53	7.03	0.00829029	-4.61774	-7.16616
2012-12-08 18:19:08	4.56	7.06	0.00898474	-4.64832	-7.19674
2012-12-08 18:20:08	4.61	7.08	0.00967918	-4.69929	-7.21713
2012-12-08 18:21:08	4.63	7.13	0.0103736	-4.71967	-7.26809
2012-12-08 18:22:08	4.66	7.16	0.0110681	-4.75025	-7.29867
2012-12-08 18:23:08	4.69	7.19	0.0117625	-4.78084	-7.32926
2012-12-08 18:24:08	4.72	7.22	0.012457	-4.81142	-7.35984
2012-12-08 18:25:08	4.76	7.26	0.0131514	-4.85219	-7.40061
2012-12-08 18:26:08	4.79	7.28	0.0138458	-4.88277	-7.421
2012-12-08 18:27:08	4.83	7.32	0.0145403	-4.92355	-7.46177
2012-12-08 18:28:08	4.85	7.34	0.0152347	-4.94393	-7.48216
2012-12-08 18:29:08	4.87	7.37	0.0159292	-4.96432	-7.51274	2012-12-08 18:29:08
2012-12-08 18:30:08	4.9	7.41	0.0166236	-4.9949	-7.55352
2012-12-08 18:31:08	4.94	7.41	0.0173181	-5.03568	-7.55352
2012-12-08 18:32:08	4.95	7.46	0.0180125	-5.04587	-7.60449
2012-12-08 18:33:08	5	7.49	0.018707	-5.09684	-7.63507
2012-12-08 18:34:08	5.02	7.52	0.0194014	-5.11723	-7.66565
2012-12-08 18:35:08	5.05	7.56	0.0200958	-5.14781	-7.70642
2012-12-08 18:36:08	5.08	7.58	0.0207903	-5.17839	-7.72681
2012-12-08 18:37:08	5.11	7.61	0.0214847	-5.20897	-7.75739
2012-12-08 18:38:08	5.14	7.65	0.0221792	-5.23955	-7.79817
2012-12-08 18:39:08	5.16	7.65	0.0228736	-5.25994	-7.79817
2012-12-08 18:40:08	5.19	7.69	0.0235681	-5.29052	-7.83894
2012-12-08 18:41:08	5.23	7.71	0.0242625	-5.33129	-7.85933
2012-12-08 18:42:08	5.23	7.73	0.024957	-5.33129	-7.87971
2012-12-08 18:43:08	5.25	7.76	0.0256514	-5.35168	-7.9103
2012-12-08 18:44:08	5.29	7.79	0.0263458	-5.39246	-7.94088
2012-12-08 18:45:08	5.3	7.79	0.0270403	-5.40265	-7.94088
2012-12-08 18:46:08	5.33	7.83	0.0277347	-5.43323	-7.98165
2012-12-08 18:47:08	5.36	7.85	0.0284292	-5.46381	-8.00204
2012-12-08 18:48:08	5.4	7.86	0.0291236	-5.50459	-8.01223
2012-12-08 18:49:08	5.42	7.89	0.0298181	-5.52497	-8.04281
2012-12-08 18:50:08	5.44	7.93	0.0305125	-5.54536	-8.08359
2012-12-08 18:51:08	5.47	7.94	0.031207	-5.57594	-8.09378
2012-12-08 19:01:08	5.72	8.21	0.0381514	-5.83078	-8.36901
2012-12-08 19:11:08	5.91	8.42	0.0450958	-6.02446	-8.58308	2012-12-08 19:11:08
2012-12-08 19:21:08	6.15	8.64	0.0520403	-6.26911	-8.80734
2012-12-08 19:31:08	6.36	8.85	0.0589847	-6.48318	-9.02141
2012-12-08 19:41:08	6.58	9.06	0.0659292	-6.70744	-9.23547
2012-12-08 19:51:08	6.79	9.28	0.0728736	-6.92151	-9.45973
2012-12-08 20:01:08	6.99	9.46	0.0798181	-7.12538	-9.64322
2012-12-08 20:11:08	7.17	9.67	0.0867625	-7.30887	-9.85729	2012-12-08 20:11:08
2012-12-08 20:21:08	7.38	9.85	0.093707	-7.52294	-10.0408
2012-12-08 20:31:08	7.56	10.06	0.100651	-7.70642	-10.2548
2012-12-08 20:41:08	7.68	10.15	0.107596	-7.82875	-10.3466
2012-12-08 20:51:08	7.76	10.25	0.11454	-7.9103	-10.4485	2012-12-08 20:51:08
2012-12-09 09:11:08	8.88	11.4	0.628429	-9.05199	-11.6208	2012-12-09 09:11:08
2012-12-09 09:21:08	8.97	11.49	0.635374	-9.14373	-11.7125
2012-12-09 09:31:08	9.05	11.53	0.642318	-9.22528	-11.7533
2012-12-09 09:41:08	9.14	11.66	0.649263	-9.31702	-11.8858
2012-12-09 09:51:08	9.25	11.76	0.656207	-9.42915	-11.9878
2012-12-09 10:01:08	9.36	11.85	0.663151	-9.54128	-12.0795
2012-12-09 10:11:08	9.44	11.93	0.670096	-9.62283	-12.1611	2012-12-09 10:11:08
2012-12-09 10:21:08	9.48	12	0.67704	-9.66361	-12.2324
2012-12-09 10:31:08	9.59	12.11	0.683985	-9.77574	-12.3445
2012-12-09 10:41:08	9.69	12.21	0.690929	-9.87768	-12.4465
2012-12-09 10:51:08	9.8	12.31	0.697874	-9.98981	-12.5484
2012-12-09 11:01:08	9.88	12.4	0.704818	-10.0714	-12.6402
2012-12-09 11:11:08	9.99	12.53	0.711763	-10.1835	-12.7727	2012-12-09 11:11:08
2012-12-09 11:21:08	10	12.53	0.718707	-10.1937	-12.7727
2012-12-09 11:31:08	10.14	12.66	0.725651	-10.3364	-12.9052
2012-12-09 11:41:08	10.18	12.7	0.732596	-10.3772	-12.946
2012-12-09 11:51:08	10.3	12.82	0.73954	-10.4995	-13.0683
2012-12-09 12:01:08	9.76	12.25	0.746485	-9.94903	-12.4873
2012-12-09 12:11:08	9.98	12.54	0.753429	-10.1733	-12.7829	2012-12-09 12:11:08
2012-12-09 12:21:08	10.24	12.81	0.760374	-10.4383	-13.0581
2012-12-09 12:31:08	10.38	12.94	0.767318	-10.581	-13.1906
2012-12-09 12:41:08	10.49	13.05	0.774263	-10.6932	-13.3028
2012-12-09 12:51:08	10.6	13.15	0.781207	-10.8053	-13.4047
2012-12-09 13:01:08	10.73	13.3	0.788151	-10.9378	-13.5576
2012-12-09 13:11:08	10.84	13.39	0.795096	-11.0499	-13.6493	2012-12-09 13:11:08
2012-12-09 13:21:08	10.9	13.45	0.80204	-11.1111	-13.7105
2012-12-09 13:31:08	10.95	13.51	0.808985	-11.1621	-13.7717
2012-12-09 13:41:08	11.11	13.62	0.815929	-11.3252	-13.8838
2012-12-09 13:51:08	11.2	13.76	0.822874	-11.4169	-14.0265
2012-12-09 14:01:08	11.29	13.84	0.829818	-11.5087	-14.1081
2012-12-09 14:11:08	11.38	13.93	0.836763	-11.6004	-14.1998	2012-12-09 14:11:08
2012-12-09 14:21:08	11.46	14.02	0.843707	-11.682	-14.2915
2012-12-09 14:31:08	11.57	14.12	0.850651	-11.7941	-14.3935
2012-12-09 14:41:08	11.65	14.21	0.857596	-11.8756	-14.4852
2012-12-09 14:51:08	11.73	14.29	0.86454	-11.9572	-14.5668
2012-12-09 15:01:08	11.83	14.35	0.871485	-12.0591	-14.6279
2012-12-09 15:11:08	11.9	14.47	0.878429	-12.1305	-14.7503	2012-12-09 15:11:08
2012-12-09 15:21:08	12	14.57	0.885374	-12.2324	-14.8522
2012-12-09 15:31:08	12.08	14.64	0.892318	-12.314	-14.9235
2012-12-09 15:41:08	12.18	14.71	0.899263	-12.4159	-14.9949
2012-12-09 16:01:08	12.37	14.92	0.913151	-12.6096	-15.209
2012-12-09 16:11:08	12.46	15.01	0.920096	-12.7013	-15.3007
2012-12-09 16:21:08	12.09	14.61	0.92704	-12.3242	-14.893	2012-12-09 16:21:08
2012-12-09 16:51:08	12.05	14.55	0.947874	-12.2834	-14.8318
2012-12-09 17:01:08	12.22	14.78	0.954818	-12.4567	-15.0663
2012-12-09 17:11:08	12.39	14.96	0.961763	-12.63	-15.2497
2012-12-09 17:21:08	12.48	15.04	0.968707	-12.7217	-15.3313
2012-12-09 17:31:08	12.62	15.17	0.975651	-12.8644	-15.4638
2012-12-09 17:41:08	12.79	15.3	0.982596	-13.0377	-15.5963	2012-12-09 17:41:08
2012-12-09 17:51:08	12.85	15.39	0.98954	-13.0989	-15.6881
2012-12-09 18:01:08	12.95	15.49	0.996485	-13.2008	-15.79
2012-12-09 18:11:08	13.06	15.59	1.00343	-13.3129	-15.8919
2012-12-09 18:21:08	13.13	15.67	1.01037	-13.3843	-15.9735
2012-12-09 18:31:08	13.25	15.79	1.01732	-13.5066	-16.0958
2012-12-09 18:41:08	13.31	15.86	1.02426	-13.5678	-16.1672	2012-12-09 18:41:08
2012-12-09 18:51:08	13.41	15.95	1.03121	-13.6697	-16.2589
2012-12-09 19:01:08	13.49	16.03	1.03815	-13.7513	-16.3405
2012-12-09 19:11:08	13.56	16.11	1.0451	-13.8226	-16.422
2012-12-09 19:21:08	13.68	16.22	1.05204	-13.945	-16.5341
2012-12-09 19:31:08	13.78	16.32	1.05898	-14.0469	-16.6361
2012-12-09 19:41:08	13.85	16.4	1.06593	-14.1182	-16.7176	2012-12-09 19:41:08
2012-12-09 19:51:08	13.39	15.93	1.07287	-13.6493	-16.2385
2012-12-09 20:01:08	13.7	16.24	1.07982	-13.9653	-16.5545
2012-12-09 20:11:08	13.9	16.43	1.08676	-14.1692	-16.7482
2012-12-09 20:21:08	14.02	16.55	1.09371	-14.2915	-16.8705
2012-12-09 20:31:08	14.14	16.68	1.10065	-14.4139	-17.0031
2012-12-09 20:41:08	14.25	16.78	1.1076	-14.526	-17.105	2012-12-09 20:41:08
2012-12-09 20:51:08	14.36	16.88	1.11454	-14.6381	-17.2069
2012-12-09 21:01:08	14.46	16.99	1.12148	-14.7401	-17.3191
2012-12-09 21:11:08	14.55	17.08	1.12843	-14.8318	-17.4108
2012-12-09 21:21:08	14.6	17.13	1.13537	-14.8828	-17.4618
2012-12-09 21:31:08	14.74	17.25	1.14232	-15.0255	-17.5841
2012-12-09 21:41:08	14.78	17.31	1.14926	-15.0663	-17.6453	2012-12-09 21:41:08
2012-12-09 21:51:08	14.91	17.4	1.15621	-15.1988	-17.737
2012-12-09 22:01:08	14.95	17.49	1.16315	-15.2396	-17.8287
2012-12-09 22:11:08	15	17.58	1.1701	-15.2905	-17.9205
2012-12-09 22:21:08	15.11	17.65	1.17704	-15.4027	-17.9918
2012-12-09 22:31:08	15.16	17.69	1.18398	-15.4536	-18.0326
2012-12-09 22:41:08	15.22	17.75	1.19093	-15.5148	-18.0938	2012-12-09 22:41:08
2012-12-09 22:51:08	15.33	17.86	1.19787	-15.6269	-18.2059
2012-12-09 23:01:08	15.42	17.96	1.20482	-15.7187	-18.3078
2012-12-09 23:11:08	15.53	18.06	1.21176	-15.8308	-18.4098
2012-12-09 23:21:08	15.57	18.11	1.21871	-15.8716	-18.4608
2012-12-09 23:31:08	15.63	18.17	1.22565	-15.9327	-18.5219
2012-12-09 23:41:08	15.7	18.25	1.2326	-16.0041	-18.6035	2012-12-09 23:41:08
2012-12-09 23:51:08	15.8	18.3	1.23954	-16.106	-18.6544
2012-12-10 00:01:08	15.86	18.4	1.24648	-16.1672	-18.7564
2012-12-10 00:11:08	15.93	18.46	1.25343	-16.2385	-18.8175
2012-12-10 00:21:08	16.01	18.55	1.26037	-16.3201	-18.9093
2012-12-10 00:31:08	16.07	18.61	1.26732	-16.3812	-18.9704
2012-12-10 00:41:08	16.1	18.63	1.27426	-16.4118	-18.9908	2012-12-10 00:41:08
2012-12-10 00:51:08	16.19	18.72	1.28121	-16.5036	-19.0826
2012-12-10 01:01:08	16.25	18.78	1.28815	-16.5647	-19.1437
2012-12-10 01:11:08	16.31	18.86	1.2951	-16.6259	-19.2253
2012-12-10 01:21:08	16.39	18.94	1.30204	-16.7074	-19.3068
2012-12-10 01:31:08	16.47	19.01	1.30898	-16.789	-19.3782
2012-12-10 01:41:08	16.52	19.03	1.31593	-16.84	-19.3986	2012-12-10 01:41:08
2012-12-10 01:51:08	16.58	19.12	1.32287	-16.9011	-19.4903
2012-12-10 02:01:08	16.7	19.22	1.32982	-17.0234	-19.5923
2012-12-10 02:11:08	16.75	19.3	1.33676	-17.0744	-19.6738
2012-12-10 02:21:08	16.85	19.38	1.34371	-17.1764	-19.7554
2012-12-10 02:31:08	16.92	19.46	1.35065	-17.2477	-19.8369
2012-12-10 02:41:08	16.99	19.53	1.3576	-17.3191	-19.9083	2012-12-10 02:41:08
2012-12-10 02:51:08	17.03	19.58	1.36454	-17.3598	-19.9592
2012-12-10 03:01:08	17.05	19.59	1.37148	-17.3802	-19.9694
2012-12-10 03:11:08	17.17	19.7	1.37843	-17.5025	-20.0815
2012-12-10 03:21:08	17.24	19.78	1.38537	-17.5739	-20.1631
2012-12-10 03:31:08	17.32	19.85	1.39232	-17.6555	-20.2345
2012-12-10 03:41:08	17.38	19.88	1.39926	-17.7166	-20.265	2012-12-10 03:41:08
2012-12-10 03:51:08	17.44	19.98	1.40621	-17.7778	-20.367
2012-12-10 04:01:08	17.52	20.07	1.41315	-17.8593	-20.4587
2012-12-10 04:11:08	17.61	20.15	1.4201	-17.9511	-20.5403
2012-12-10 04:21:08	17.63	20.17	1.42704	-17.9715	-20.5607
2012-12-10 04:31:08	17.71	20.25	1.43398	-18.053	-20.6422
2012-12-10 04:41:08	17.74	20.3	1.44093	-18.0836	-20.6932	2012-12-10 04:41:08
2012-12-10 04:51:08	17.8	20.35	1.44787	-18.1448	-20.7441
2012-12-10 05:01:08	17.89	20.44	1.45482	-18.2365	-20.8359
2012-12-10 05:11:08	17.98	20.49	1.46176	-18.3282	-20.8869
2012-12-10 05:21:08	18.02	20.56	1.46871	-18.369	-20.9582
2012-12-10 05:31:08	18.07	20.62	1.47565	-18.42	-21.0194
2012-12-10 05:41:08	18.13	20.69	1.4826	-18.4811	-21.0907	2012-12-10 05:41:08
2012-12-10 05:51:08	18.15	20.69	1.48954	-18.5015	-21.0907
2012-12-10 06:01:08	18.21	20.75	1.49648	-18.5627	-21.1519
2012-12-10 06:11:08	17.88	20.41	1.50343	-18.2263	-20.8053
2012-12-10 06:21:08	18.12	20.66	1.51037	-18.4709	-21.0601
2012-12-10 06:31:08	18.23	20.76	1.51732	-18.5831	-21.1621
2012-12-10 06:41:08	18.32	20.84	1.52426	-18.6748	-21.2436	2012-12-10 06:41:08
2012-12-10 06:51:08	18.39	20.93	1.53121	-18.7462	-21.3354
2012-12-10 07:01:08	18.47	21	1.53815	-18.8277	-21.4067
2012-12-10 07:11:08	18.51	21.05	1.5451	-18.8685	-21.4577
2012-12-10 07:21:08	18.6	21.14	1.55204	-18.9602	-21.5494
2012-12-10 07:31:08	18.66	21.2	1.55898	-19.0214	-21.6106
2012-12-10 07:41:08	18.69	21.23	1.56593	-19.052	-21.6412	2012-12-10 07:41:08
2012-12-10 07:51:08	18.75	21.25	1.57287	-19.1131	-21.6616
2012-12-10 08:01:08	18.78	21.32	1.57982	-19.1437	-21.7329
2012-12-10 08:11:08	18.77	21.31	1.58676	-19.1335	-21.7227
2012-12-10 08:21:08	18.83	21.37	1.59371	-19.1947	-21.7839
2012-12-10 08:31:08	18.83	21.37	1.60065	-19.1947	-21.7839
2012-12-10 08:41:08	18.9	21.45	1.6076	-19.2661	-21.8654	2012-12-10 08:41:08
2012-12-10 08:51:08	18.96	21.5	1.61454	-19.3272	-21.9164
2012-12-10 09:01:08	19.03	21.56	1.62148	-19.3986	-21.9776
2012-12-10 09:11:08	19.05	21.59	1.62843	-19.419	-22.0082
2012-12-10 09:21:08	19.13	21.64	1.63537	-19.5005	-22.0591
2012-12-10 09:31:08	18.8	21.33	1.64232	-19.1641	-21.7431
2012-12-10 09:41:08	19.01	21.54	1.64926	-19.3782	-21.9572	2012-12-10 09:41:08
2012-12-10 09:51:08	19.12	21.65	1.65621	-19.4903	-22.0693
2012-12-10 10:01:08	19.19	21.71	1.66315	-19.5617	-22.1305
2012-12-10 10:11:08	19.13	21.62	1.6701	-19.5005	-22.0387
2012-12-10 10:21:08	19.27	21.76	1.67704	-19.6432	-22.1814
2012-12-10 10:31:08	19.31	21.84	1.68398	-19.684	-22.263
2012-12-10 10:41:08	19.35	21.88	1.69093	-19.7248	-22.3038	2012-12-10 10:41:08
2012-12-10 10:51:08	19.42	21.95	1.69787	-19.7961	-22.3751
2012-12-10 11:01:08	19.45	21.98	1.70482	-19.8267	-22.4057
2012-12-10 11:11:08	19.53	22.05	1.71176	-19.9083	-22.4771
2012-12-10 11:21:08	19.51	22.03	1.71871	-19.8879	-22.4567
2012-12-10 11:31:08	19.61	22.13	1.72565	-19.9898	-22.5586
2012-12-10 11:41:08	19.62	22.15	1.7326	-20	-22.579	2012-12-10 11:41:08
2012-12-10 11:51:08	19.69	22.22	1.73954	-20.0714	-22.6504
2012-12-10 12:01:08	19.73	22.27	1.74648	-20.1121	-22.7013
2012-12-10 12:11:08	19.79	22.32	1.75343	-20.1733	-22.7523
2012-12-10 12:21:08	19.85	22.38	1.76037	-20.2345	-22.8135
2012-12-10 12:31:08	19.86	22.38	1.76732	-20.2446	-22.8135
2012-12-10 12:41:08	19.96	22.45	1.77426	-20.3466	-22.8848	2012-12-10 12:41:08
2012-12-10 12:51:08	19.98	22.51	1.78121	-20.367	-22.946
2012-12-10 13:01:08	20.05	22.55	1.78815	-20.4383	-22.9867
2012-12-10 13:08:40	20.02	22.55	1.79339	-20.4077	-22.9867
2012-12-10 13:09:40	20.03	22.57	1.79408	-20.4179	-23.0071
2012-12-10 13:10:40	20.04	22.58	1.79478	-20.4281	-23.0173
2012-12-10 13:11:40	20.05	22.58	1.79547	-20.4383	-23.0173	2012-12-10 13:11:40
2012-12-10 13:12:40	20.05	22.58	1.79617	-20.4383	-23.0173
2012-12-10 13:13:40	20.05	22.59	1.79686	-20.4383	-23.0275
2012-12-10 13:14:40	20.06	22.59	1.79755	-20.4485	-23.0275
2012-12-10 13:15:40	20.08	22.59	1.79825	-20.4689	-23.0275
2012-12-10 13:16:40	20.08	22.6	1.79894	-20.4689	-23.0377
2012-12-10 13:17:40	20.09	22.61	1.79964	-20.4791	-23.0479	2012-12-10 13:17:40
2012-12-10 13:18:40	20.1	22.63	1.80033	-20.4893	-23.0683
2012-12-10 13:19:40	20.1	22.62	1.80103	-20.4893	-23.0581
2012-12-10 13:20:40	20.11	22.63	1.80172	-20.4995	-23.0683
2012-12-10 13:21:40	20.11	22.63	1.80242	-20.4995	-23.0683
2012-12-10 13:22:40	20.12	22.65	1.80311	-20.5097	-23.0887
2012-12-10 13:23:40	20.13	22.65	1.8038	-20.5199	-23.0887	2012-12-10 13:23:40
2012-12-10 13:24:40	20.12	22.65	1.8045	-20.5097	-23.0887
2012-12-10 13:25:40	20.17	22.66	1.80519	-20.5607	-23.0989
2012-12-10 13:26:40	20.14	22.67	1.80589	-20.5301	-23.1091
2012-12-10 13:27:40	20.16	22.68	1.80658	-20.5505	-23.1193
2012-12-10 13:28:40	20.18	22.68	1.80728	-20.5708	-23.1193
2012-12-10 13:29:40	20.17	22.7	1.80797	-20.5607	-23.1397	2012-12-10 13:29:40
2012-12-10 13:30:40	20.18	22.71	1.80867	-20.5708	-23.1498
2012-12-10 13:31:40	20.18	22.71	1.80936	-20.5708	-23.1498
2012-12-10 13:32:40	20.17	22.7	1.81005	-20.5607	-23.1397
2012-12-10 13:33:40	20.19	22.72	1.81075	-20.581	-23.16
2012-12-10 13:34:40	20.18	22.72	1.81144	-20.5708	-23.16
2012-12-10 13:35:40	20.19	22.71	1.81214	-20.581	-23.1498	2012-12-10 13:35:40
2012-12-10 13:36:40	20.18	22.7	1.81283	-20.5708	-23.1397
2012-12-10 13:37:40	20.2	22.73	1.81353	-20.5912	-23.1702
2012-12-10 13:38:40	20.21	22.74	1.81422	-20.6014	-23.1804
2012-12-10 13:39:40	20.21	22.74	1.81492	-20.6014	-23.1804
2012-12-10 13:40:40	20.22	22.75	1.81561	-20.6116	-23.1906
2012-12-10 13:41:40	20.21	22.75	1.8163	-20.6014	-23.1906	2012-12-10 13:41:40
2012-12-10 13:42:40	20.22	22.75	1.817	-20.6116	-23.1906
2012-12-10 13:43:40	20.23	22.72	1.81769	-20.6218	-23.16
2012-12-10 13:44:40	20.25	22.75	1.81839	-20.6422	-23.1906
2012-12-10 13:45:40	20.27	22.76	1.81908	-20.6626	-23.2008
2012-12-10 13:46:40	20.26	22.78	1.81978	-20.6524	-23.2212
2012-12-10 13:47:40	20.26	22.78	1.82047	-20.6524	-23.2212	2012-12-10 13:47:40
2012-12-10 13:48:40	20.22	22.75	1.82117	-20.6116	-23.1906
2012-12-10 13:49:40	20.25	22.78	1.82186	-20.6422	-23.2212
2012-12-10 13:50:40	20.28	22.78	1.82255	-20.6728	-23.2212
2012-12-10 13:51:40	20.27	22.81	1.82325	-20.6626	-23.2518
2012-12-10 13:52:40	20.28	22.81	1.82394	-20.6728	-23.2518
2012-12-10 13:53:40	20.29	22.82	1.82464	-20.683	-23.262	2012-12-10 13:53:40
2012-12-10 13:54:40	20.29	22.81	1.82533	-20.683	-23.2518
2012-12-10 13:55:40	20.28	22.81	1.82603	-20.6728	-23.2518
2012-12-10 13:56:40	20.28	22.81	1.82672	-20.6728	-23.2518
2012-12-10 13:57:40	20.3	22.83	1.82742	-20.6932	-23.2722
2012-12-10 13:58:40	20.3	22.83	1.82811	-20.6932	-23.2722
2012-12-10 13:59:40	20.3	22.82	1.8288	-20.6932	-23.262	2012-12-10 13:59:40
2012-12-10 14:00:40	20.33	22.82	1.8295	-20.7238	-23.262
2012-12-10 14:01:40	20.32	22.84	1.83019	-20.7136	-23.2824
2012-12-10 14:02:40	20.31	22.85	1.83089	-20.7034	-23.2926
2012-12-10 14:03:40	20.33	22.86	1.83158	-20.7238	-23.3028
2012-12-10 14:04:40	20.36	22.85	1.83228	-20.7543	-23.2926
2012-12-10 14:05:40	20.35	22.87	1.83297	-20.7441	-23.3129	2012-12-10 14:05:40
2012-12-10 14:06:40	20.35	22.87	1.83367	-20.7441	-23.3129
2012-12-10 14:07:40	20.36	22.88	1.83436	-20.7543	-23.3231
2012-12-10 14:08:40	20.36	22.88	1.83505	-20.7543	-23.3231
2012-12-10 14:18:40	20.41	22.93	1.842	-20.8053	-23.3741
2012-12-10 14:28:40	20.45	22.98	1.84894	-20.8461	-23.4251
2012-12-10 14:38:40	20.47	22.97	1.85589	-20.8665	-23.4149	2012-12-10 14:38:40
2012-12-10 14:48:40	20.52	23.04	1.86283	-20.9174	-23.4862
2012-12-10 14:58:40	20.55	23.09	1.86978	-20.948	-23.5372
2012-12-10 15:08:40	20.59	23.12	1.87672	-20.9888	-23.5678
2012-12-10 15:18:40	20.48	23.01	1.88367	-20.8767	-23.4557
2012-12-10 15:28:40	20.61	23.14	1.89061	-21.0092	-23.5882
2012-12-10 15:38:40	20.71	23.19	1.89755	-21.1111	-23.6391	2012-12-10 15:38:40
2012-12-10 15:48:40	20.73	23.23	1.9045	-21.1315	-23.6799
2012-12-10 15:58:40	20.77	23.29	1.91144	-21.1723	-23.7411
2012-12-10 16:08:40	20.81	23.33	1.91839	-21.213	-23.7819
2012-12-10 16:18:40	20.85	23.37	1.92533	-21.2538	-23.8226
2012-12-10 16:28:40	20.92	23.46	1.93228	-21.3252	-23.9144
2012-12-10 16:38:40	21	23.52	1.93922	-21.4067	-23.9755	2012-12-10 16:38:40
2012-12-10 16:48:40	21.05	23.54	1.94617	-21.4577	-23.9959
2012-12-10 16:58:40	21.08	23.59	1.95311	-21.4883	-24.0469
2012-12-10 17:08:40	21.09	23.63	1.96005	-21.4985	-24.0877
2012-12-10 17:18:40	21.19	23.68	1.967	-21.6004	-24.1386
2012-12-10 17:28:40	21.18	23.71	1.97394	-21.5902	-24.1692
2012-12-10 17:38:40	21.23	23.76	1.98089	-21.6412	-24.2202	2012-12-10 17:38:40
2012-12-10 17:48:40	20.91	23.43	1.98783	-21.315	-23.8838
2012-12-10 17:58:40	21.07	23.61	1.99478	-21.4781	-24.0673
2012-12-10 18:08:40	21.23	23.76	2.00172	-21.6412	-24.2202
2012-12-10 18:18:40	21.27	23.8	2.00867	-21.682	-24.261
2012-12-10 18:28:40	21.3	23.83	2.01561	-21.7125	-24.2915
2012-12-10 18:38:40	21.36	23.85	2.02255	-21.7737	-24.3119	2012-12-10 18:38:40
2012-12-10 18:48:40	21.41	23.94	2.0295	-21.8247	-24.4037
2012-12-10 18:58:40	21.47	23.99	2.03644	-21.8858	-24.4546
2012-12-10 19:08:40	21.53	24.05	2.04339	-21.947	-24.5158
2012-12-10 19:18:40	21.59	24.1	2.05033	-22.0082	-24.5668
2012-12-10 19:28:40	21.55	24.07	2.05728	-21.9674	-24.5362
2012-12-10 19:38:40	21.62	24.14	2.06422	-22.0387	-24.6075	2012-12-10 19:38:40
2012-12-10 19:48:40	21.66	24.18	2.07117	-22.0795	-24.6483
2012-12-10 19:58:40	21.72	24.21	2.07811	-22.1407	-24.6789
2012-12-10 20:08:40	21.76	24.29	2.08505	-22.1814	-24.7604
2012-12-10 20:18:40	21.78	24.3	2.092	-22.2018	-24.7706
2012-12-10 20:28:40	21.82	24.34	2.09894	-22.2426	-24.8114
2012-12-10 20:38:40	21.88	24.4	2.10589	-22.3038	-24.8726	2012-12-10 20:38:40
2012-12-10 20:48:40	21.83	24.34	2.11283	-22.2528	-24.8114
2012-12-10 20:58:40	21.93	24.42	2.11978	-22.3547	-24.893
2012-12-10 21:08:40	21.97	24.5	2.12672	-22.3955	-24.9745
2012-12-10 21:18:40	22	24.52	2.13367	-22.4261	-24.9949
2012-12-10 21:28:40	22.06	24.58	2.14061	-22.4873	-25.0561
2012-12-10 21:38:40	22.11	24.64	2.14755	-22.5382	-25.1172	2012-12-10 21:38:40
2012-12-10 21:48:40	22.15	24.68	2.1545	-22.579	-25.158
2012-12-10 21:58:40	22.2	24.72	2.16144	-22.63	-25.1988
2012-12-10 22:08:40	22.13	24.65	2.16839	-22.5586	-25.1274
2012-12-10 22:18:40	22.23	24.75	2.17533	-22.6606	-25.2294
2012-12-10 22:28:40	22.29	24.75	2.18228	-22.7217	-25.2294
2012-12-10 22:38:40	22.32	24.84	2.18922	-22.7523	-25.3211	2012-12-10 22:38:40
2012-12-10 22:48:40	22.34	24.86	2.19617	-22.7727	-25.3415
2012-12-10 22:58:40	22.4	24.92	2.20311	-22.8338	-25.4027
2012-12-10 23:08:40	22.42	24.95	2.21005	-22.8542	-25.4332
2012-12-10 23:18:40	22.04	24.58	2.217	-22.4669	-25.0561
2012-12-10 23:28:40	22.26	24.81	2.22394	-22.6911	-25.2905
2012-12-10 23:38:40	22.42	24.96	2.23089	-22.8542	-25.4434	2012-12-10 23:38:40
2012-12-10 23:48:40	22.46	25.01	2.23783	-22.895	-25.4944
2012-12-10 23:58:40	22.54	25.05	2.24478	-22.9766	-25.5352
2012-12-11 00:08:40	22.56	25.1	2.25172	-22.9969	-25.5861
2012-12-11 00:18:40	22.6	25.14	2.25867	-23.0377	-25.6269
2012-12-11 00:28:40	22.63	25.14	2.26561	-23.0683	-25.6269
2012-12-11 00:38:40	22.65	25.19	2.27255	-23.0887	-25.6779	2012-12-11 00:38:40
2012-12-11 00:48:40	22.67	25.19	2.2795	-23.1091	-25.6779
2012-12-11 00:58:40	22.11	24.64	2.28644	-22.5382	-25.1172
2012-12-11 01:08:40	22.37	24.91	2.29339	-22.8033	-25.3925
2012-12-11 01:18:40	22.42	24.94	2.30033	-22.8542	-25.423
2012-12-11 01:28:40	22.55	25.09	2.30728	-22.9867	-25.5759
2012-12-11 01:38:40	22.62	25.15	2.31422	-23.0581	-25.6371	2012-12-11 01:38:40
2012-12-11 01:48:40	22.67	25.21	2.32117	-23.1091	-25.6983
2012-12-11 01:58:40	22.75	25.26	2.32811	-23.1906	-25.7492
2012-12-11 02:08:40	22.78	25.31	2.33505	-23.2212	-25.8002
2012-12-11 02:18:40	22.81	25.34	2.342	-23.2518	-25.8308
2012-12-11 02:28:40	22.73	25.27	2.34894	-23.1702	-25.7594
2012-12-11 02:38:40	22.86	25.4	2.35589	-23.3028	-25.8919	2012-12-11 02:38:40
2012-12-11 02:48:40	22.91	25.44	2.36283	-23.3537	-25.9327
2012-12-11 02:58:40	22.95	25.49	2.36978	-23.3945	-25.9837
2012-12-11 03:08:40	22.97	25.51	2.37672	-23.4149	-26.0041
2012-12-11 03:18:40	23.02	25.53	2.38367	-23.4659	-26.0245
2012-12-11 03:28:40	23.01	25.55	2.39061	-23.4557	-26.0449
2012-12-11 03:38:40	23.07	25.61	2.39755	-23.5168	-26.106	2012-12-11 03:38:40
2012-12-11 03:48:40	23.13	25.67	2.4045	-23.578	-26.1672
2012-12-11 03:58:40	23.17	25.71	2.41144	-23.6188	-26.208
2012-12-11 04:08:40	23.19	25.73	2.41839	-23.6391	-26.2283
2012-12-11 04:18:40	23.07	25.61	2.42533	-23.5168	-26.106
2012-12-11 04:28:40	23.2	25.74	2.43228	-23.6493	-26.2385
2012-12-11 04:38:40	23.24	25.77	2.43922	-23.6901	-26.2691	2012-12-11 04:38:40
2012-12-11 04:48:40	23.26	25.8	2.44617	-23.7105	-26.2997
2012-12-11 04:58:40	23.27	25.8	2.45311	-23.7207	-26.2997
2012-12-11 05:08:40	23.3	25.83	2.46005	-23.7513	-26.3303
2012-12-11 05:18:40	23.33	25.86	2.467	-23.7819	-26.3609
2012-12-11 05:28:40	23.39	25.92	2.47394	-23.843	-26.422
2012-12-11 05:38:40	23.44	25.97	2.48089	-23.894	-26.473	2012-12-11 05:38:40
2012-12-11 05:48:40	23.48	26.01	2.48783	-23.9348	-26.5138
2012-12-11 05:58:40	23.47	26	2.49478	-23.9246	-26.5036
2012-12-11 06:08:40	23.52	26.06	2.50172	-23.9755	-26.5647
2012-12-11 06:18:40	23.54	26.08	2.50867	-23.9959	-26.5851
2012-12-11 06:28:40	23.56	26.1	2.51561	-24.0163	-26.6055
2012-12-11 06:38:40	23.6	26.14	2.52255	-24.0571	-26.6463	2012-12-11 06:38:40
2012-12-11 06:48:40	23.55	26.09	2.5295	-24.0061	-26.5953
2012-12-11 06:58:40	23.62	26.14	2.53644	-24.0775	-26.6463
2012-12-11 07:08:40	23.67	26.2	2.54339	-24.1284	-26.7074
2012-12-11 07:18:40	23.7	26.24	2.55033	-24.159	-26.7482
2012-12-11 07:28:40	23.74	26.28	2.55728	-24.1998	-26.789
2012-12-11 07:38:40	23.72	26.26	2.56422	-24.1794	-26.7686	2012-12-11 07:38:40
2012-12-11 07:48:40	23.82	26.35	2.57117	-24.2813	-26.8603
2012-12-11 07:58:40	23.86	26.41	2.57811	-24.3221	-26.9215
2012-12-11 08:08:40	23.91	26.45	2.58505	-24.3731	-26.9623
2012-12-11 08:18:40	23.87	26.41	2.592	-24.3323	-26.9215
2012-12-11 08:28:40	23.94	26.48	2.59894	-24.4037	-26.9929
2012-12-11 08:38:40	23.98	26.52	2.60589	-24.4444	-27.0336	2012-12-11 08:38:40
2012-12-11 08:48:40	24	26.53	2.61283	-24.4648	-27.0438
2012-12-11 08:58:40	23.69	26.22	2.61978	-24.1488	-26.7278
2012-12-11 09:08:40	23.91	26.45	2.62672	-24.3731	-26.9623
2012-12-11 09:18:40	24.01	26.55	2.63367	-24.475	-27.0642
2012-12-11 09:28:40	24.03	26.57	2.64061	-24.4954	-27.0846
2012-12-11 09:38:40	24.08	26.6	2.64755	-24.5464	-27.1152	2012-12-11 09:38:40
2012-12-11 09:48:40	24.06	26.56	2.6545	-24.526	-27.0744
2012-12-11 09:58:40	23.74	26.27	2.66144	-24.1998	-26.7788
2012-12-11 10:08:40	23.97	26.51	2.66839	-24.4343	-27.0234
2012-12-11 10:18:40	24.1	26.63	2.67533	-24.5668	-27.1458
2012-12-11 10:28:40	23.88	26.38	2.68228	-24.3425	-26.8909
2012-12-11 10:38:40	24.09	26.62	2.68922	-24.5566	-27.1356	2012-12-11 10:38:40
2012-12-11 10:48:40	24.11	26.65	2.69617	-24.577	-27.1662
2012-12-11 10:58:40	23.47	26.01	2.70311	-23.9246	-26.5138
2012-12-11 11:08:40	23.71	26.25	2.71005	-24.1692	-26.7584
2012-12-11 11:18:40	23.96	26.46	2.717	-24.4241	-26.9725
2012-12-11 11:28:40	24.05	26.59	2.72394	-24.5158	-27.105
2012-12-11 11:38:40	24.04	26.56	2.73089	-24.5056	-27.0744	2012-12-11 11:38:40
2012-12-11 11:48:40	24.11	26.64	2.73783	-24.577	-27.156
2012-12-11 11:58:40	23.81	26.32	2.74478	-24.2712	-26.8298
2012-12-11 12:08:40	23.94	26.45	2.75172	-24.4037	-26.9623
2012-12-11 12:18:40	24.11	26.62	2.75867	-24.577	-27.1356
2012-12-11 12:28:40	24.2	26.71	2.76561	-24.6687	-27.2273
2012-12-11 12:38:40	24.25	26.76	2.77255	-24.7197	-27.2783	2012-12-11 12:38:40
2012-12-11 12:48:40	24.18	26.69	2.7795	-24.6483	-27.2069
2012-12-11 12:58:40	24.22	26.73	2.78644	-24.6891	-27.2477
2012-12-11 13:08:40	24.22	26.74	2.79339	-24.6891	-27.2579
2012-12-11 13:18:40	24.27	26.78	2.80033	-24.7401	-27.2987
2012-12-11 13:28:40	24.34	26.84	2.80728	-24.8114	-27.3598
2012-12-11 13:38:40	24.3	26.83	2.81422	-24.7706	-27.3496	2012-12-11 13:38:40
2012-12-11 13:48:40	24.36	26.87	2.82117	-24.8318	-27.3904
2012-12-11 13:58:40	24.4	26.91	2.82811	-24.8726	-27.4312
2012-12-11 14:08:40	24.39	26.91	2.83505	-24.8624	-27.4312
2012-12-11 14:18:40	24.44	26.96	2.842	-24.9134	-27.4822
2012-12-11 14:28:40	24.47	26.98	2.84894	-24.9439	-27.5025
2012-12-11 14:38:40	24.52	27	2.85589	-24.9949	-27.5229	2012-12-11 14:38:40
2012-12-11 14:48:40	24.5	27.02	2.86283	-24.9745	-27.5433
2012-12-11 14:58:40	24.53	27.04	2.86978	-25.0051	-27.5637
2012-12-11 15:08:40	24.61	27.12	2.87672	-25.0866	-27.6453
2012-12-11 15:18:40	24.66	27.16	2.88367	-25.1376	-27.686
2012-12-11 15:28:40	24.66	27.18	2.89061	-25.1376	-27.7064
2012-12-11 15:38:40	24.71	27.19	2.89755	-25.1886	-27.7166	2012-12-11 15:38:40
2012-12-11 15:48:40	24.73	27.24	2.9045	-25.209	-27.7676
2012-12-11 15:58:40	24.7	27.21	2.91144	-25.1784	-27.737
2012-12-11 16:08:40	24.81	27.32	2.91839	-25.2905	-27.8491
2012-12-11 16:18:40	24.84	27.34	2.92533	-25.3211	-27.8695
2012-12-11 16:28:40	24.89	27.4	2.93228	-25.3721	-27.9307
2012-12-11 16:38:40	24.94	27.45	2.93922	-25.423	-27.9817	2012-12-11 16:38:40
2012-12-11 16:48:40	24.88	27.39	2.94617	-25.3619	-27.9205
2012-12-11 16:58:40	24.92	27.41	2.95311	-25.4027	-27.9409
2012-12-11 17:08:40	24.04	26.52	2.96005	-24.5056	-27.0336
2012-12-11 17:18:40	22.94	25.48	2.967	-23.3843	-25.9735
2012-12-11 17:28:40	23.29	25.81	2.97394	-23.7411	-26.3099
2012-12-11 17:38:40	23.48	26.02	2.98089	-23.9348	-26.524	2012-12-11 17:38:40
2012-12-11 17:48:40	23.74	26.27	2.98783	-24.1998	-26.7788
2012-12-11 17:58:40	24	26.54	2.99478	-24.4648	-27.054
2012-12-11 18:08:40	24.25	26.74	3.00172	-24.7197	-27.2579
2012-12-11 18:18:40	24.43	26.92	3.00867	-24.9032	-27.4414
2012-12-11 18:28:40	24.59	27.11	3.01561	-25.0663	-27.6351
2012-12-11 18:38:40	24.75	27.27	3.02255	-25.2294	-27.7982	2012-12-11 18:38:40
2012-12-11 18:48:40	24.84	27.36	3.0295	-25.3211	-27.8899
2012-12-11 18:58:40	24.89	27.4	3.03644	-25.3721	-27.9307
2012-12-11 19:08:40	24.64	27.15	3.04339	-25.1172	-27.6758
2012-12-11 19:18:40	24.85	27.36	3.05033	-25.3313	-27.8899
2012-12-11 19:28:40	24.96	27.47	3.05728	-25.4434	-28.002
2012-12-11 19:38:40	24.99	27.52	3.06422	-25.474	-28.053	2012-12-11 19:38:40
2012-12-11 19:48:40	25	27.52	3.07117	-25.4842	-28.053
2012-12-11 19:58:40	25.07	27.58	3.07811	-25.5556	-28.1142
2012-12-11 20:08:40	25.11	27.62	3.08505	-25.5963	-28.1549
2012-12-11 20:18:40	25.2	27.72	3.092	-25.6881	-28.2569
2012-12-11 20:28:40	25.27	27.78	3.09894	-25.7594	-28.318
2012-12-11 20:38:40	25.3	27.82	3.10589	-25.79	-28.3588	2012-12-11 20:38:40
2012-12-11 20:48:40	25.35	27.86	3.11283	-25.841	-28.3996
2012-12-11 20:58:40	25.37	27.88	3.11978	-25.8614	-28.42
2012-12-11 21:08:40	25.39	27.91	3.12672	-25.8818	-28.4506
2012-12-11 21:18:40	25.37	27.92	3.13367	-25.8614	-28.4608
2012-12-11 21:28:40	25.45	27.96	3.14061	-25.9429	-28.5015
2012-12-11 21:38:40	25.51	28.03	3.14755	-26.0041	-28.5729	2012-12-11 21:38:40
2012-12-11 21:48:40	25.55	28.06	3.1545	-26.0449	-28.6035
2012-12-11 21:58:40	25.61	28.09	3.16144	-26.106	-28.634
2012-12-11 22:08:40	25.65	28.16	3.16839	-26.1468	-28.7054
2012-12-11 22:18:40	25.68	28.2	3.17533	-26.1774	-28.7462
2012-12-11 22:28:40	25.74	28.22	3.18228	-26.2385	-28.7666
2012-12-11 22:38:40	25.77	28.29	3.18922	-26.2691	-28.8379	2012-12-11 22:38:40
2012-12-11 22:48:40	25.8	28.31	3.19617	-26.2997	-28.8583
2012-12-11 22:58:40	25.84	28.35	3.20311	-26.3405	-28.8991
2012-12-11 23:08:40	25.88	28.41	3.21005	-26.3812	-28.9602
2012-12-11 23:18:40	25.91	28.43	3.217	-26.4118	-28.9806
2012-12-11 23:28:40	25.96	28.47	3.22394	-26.4628	-29.0214
2012-12-11 23:38:40	25.98	28.48	3.23089	-26.4832	-29.0316	2012-12-11 23:38:40
2012-12-11 23:48:40	26.03	28.53	3.23783	-26.5341	-29.0826
2012-12-11 23:58:40	26.04	28.52	3.24478	-26.5443	-29.0724
2012-12-12 00:08:40	26.06	28.57	3.25172	-26.5647	-29.1233
2012-12-12 00:18:40	26.09	28.61	3.25867	-26.5953	-29.1641
2012-12-12 00:28:40	26.13	28.66	3.26561	-26.6361	-29.2151
2012-12-12 00:38:40	26.17	28.69	3.27255	-26.6769	-29.2457	2012-12-12 00:38:40
2012-12-12 00:48:40	26.21	28.74	3.2795	-26.7176	-29.2966
2012-12-12 00:58:40	26.25	28.77	3.28644	-26.7584	-29.3272
2012-12-12 01:08:40	26.28	28.8	3.29339	-26.789	-29.3578
2012-12-12 01:18:40	26.26	28.75	3.30033	-26.7686	-29.3068
2012-12-12 01:28:40	26.32	28.8	3.30728	-26.8298	-29.3578
2012-12-12 01:38:40	26.33	28.86	3.31422	-26.84	-29.419	2012-12-12 01:38:40
2012-12-12 01:48:40	26.43	28.94	3.32117	-26.9419	-29.5005
2012-12-12 01:58:40	26.47	28.99	3.32811	-26.9827	-29.5515
2012-12-12 02:08:40	26.51	29.03	3.33505	-27.0234	-29.5923
2012-12-12 02:18:40	26.54	29.06	3.342	-27.054	-29.6228
2012-12-12 02:28:40	26.59	29.1	3.34894	-27.105	-29.6636
2012-12-12 02:38:40	26.6	29.11	3.35589	-27.1152	-29.6738	2012-12-12 02:38:40
2012-12-12 02:48:40	26.62	29.14	3.36283	-27.1356	-29.7044
2012-12-12 02:58:40	26.68	29.16	3.36978	-27.1967	-29.7248
2012-12-12 03:08:40	26.67	29.19	3.37672	-27.1865	-29.7554
2012-12-12 03:18:40	26.7	29.22	3.38367	-27.2171	-29.7859
2012-12-12 03:28:40	26.75	29.27	3.39061	-27.2681	-29.8369
2012-12-12 03:38:40	26.79	29.32	3.39755	-27.3089	-29.8879	2012-12-12 03:38:40
2012-12-12 03:48:40	26.85	29.36	3.4045	-27.37	-29.9286
2012-12-12 03:58:40	26.86	29.38	3.41144	-27.3802	-29.949
2012-12-12 04:08:40	26.89	29.41	3.41839	-27.4108	-29.9796
2012-12-12 04:18:40	26.92	29.42	3.42533	-27.4414	-29.9898
2012-12-12 04:28:40	26.96	29.47	3.43228	-27.4822	-30.0408
2012-12-12 04:38:40	26.97	29.49	3.43922	-27.4924	-30.0612	2012-12-12 04:38:40
2012-12-12 04:48:40	26.99	29.51	3.44617	-27.5127	-30.0815
2012-12-12 04:58:40	27.01	29.53	3.45311	-27.5331	-30.1019
2012-12-12 05:08:40	27.06	29.59	3.46005	-27.5841	-30.1631
2012-12-12 05:18:40	27.13	29.63	3.467	-27.6555	-30.2039
2012-12-12 05:28:40	27.06	29.57	3.47394	-27.5841	-30.1427
2012-12-12 05:38:40	27.11	29.62	3.48089	-27.6351	-30.1937	2012-12-12 05:38:40
2012-12-12 05:48:40	27.16	29.68	3.48783	-27.686	-30.2548
2012-12-12 05:58:40	27.2	29.71	3.49478	-27.7268	-30.2854
2012-12-12 06:08:40	27.24	29.75	3.50172	-27.7676	-30.3262
2012-12-12 06:18:40	27.24	29.75	3.50867	-27.7676	-30.3262
2012-12-12 06:28:40	27.26	29.78	3.51561	-27.788	-30.3568
2012-12-12 06:38:40	27.3	29.82	3.52255	-27.8287	-30.3976	2012-12-12 06:38:40
2012-12-12 06:48:40	27.34	29.86	3.5295	-27.8695	-30.4383
2012-12-12 06:58:40	27.39	29.87	3.53644	-27.9205	-30.4485
2012-12-12 07:08:40	27.36	29.87	3.54339	-27.8899	-30.4485
2012-12-12 07:18:40	27.45	29.94	3.55033	-27.9817	-30.5199
2012-12-12 07:28:40	27.48	29.96	3.55728	-28.0122	-30.5403
2012-12-12 07:38:40	27.46	29.99	3.56422	-27.9918	-30.5708	2012-12-12 07:38:40
2012-12-12 07:48:40	27.53	30.01	3.57117	-28.0632	-30.5912
2012-12-12 07:58:40	27.57	30.09	3.57811	-28.104	-30.6728
2012-12-12 08:08:40	27.53	30.05	3.58505	-28.0632	-30.632
2012-12-12 08:18:40	27.61	30.13	3.592	-28.1448	-30.7136
2012-12-12 08:28:40	27.63	30.14	3.59894	-28.1651	-30.7238
2012-12-12 08:38:40	27.66	30.17	3.60589	-28.1957	-30.7543	2012-12-12 08:38:40
2012-12-12 08:48:40	27.69	30.21	3.61283	-28.2263	-30.7951
2012-12-12 08:58:40	27.72	30.23	3.61978	-28.2569	-30.8155
2012-12-12 09:08:40	27.75	30.24	3.62672	-28.2875	-30.8257
2012-12-12 09:18:40	27.76	30.28	3.63367	-28.2977	-30.8665
2012-12-12 09:28:40	27.31	29.79	3.64061	-27.8389	-30.367
2012-12-12 09:38:40	27.54	30.05	3.64755	-28.0734	-30.632	2012-12-12 09:38:40
2012-12-12 09:48:40	27.73	30.22	3.6545	-28.2671	-30.8053
2012-12-12 09:58:40	27.82	30.32	3.66144	-28.3588	-30.9072
2012-12-12 10:08:40	27.84	30.35	3.66839	-28.3792	-30.9378
2012-12-12 10:18:40	27.86	30.38	3.67533	-28.3996	-30.9684
2012-12-12 10:28:40	27.88	30.39	3.68228	-28.42	-30.9786
2012-12-12 10:38:40	27.92	30.42	3.68922	-28.4608	-31.0092	2012-12-12 10:38:40
2012-12-12 10:48:40	27.96	30.47	3.69617	-28.5015	-31.0601
2012-12-12 10:58:40	27.98	30.5	3.70311	-28.5219	-31.0907
2012-12-12 11:08:40	27.97	30.49	3.71005	-28.5117	-31.0805
2012-12-12 11:18:40	28.02	30.54	3.717	-28.5627	-31.1315
2012-12-12 11:28:40	28.05	30.54	3.72394	-28.5933	-31.1315
2012-12-12 11:38:40	28.07	30.6	3.73089	-28.6137	-31.1927	2012-12-12 11:38:40
2012-12-12 11:48:40	28.12	30.6	3.73783	-28.6646	-31.1927
2012-12-12 11:58:40	28.14	30.65	3.74478	-28.685	-31.2436
2012-12-12 12:08:40	28.12	30.64	3.75172	-28.6646	-31.2334
2012-12-12 12:18:40	28.14	30.66	3.75867	-28.685	-31.2538
2012-12-12 12:28:40	28.2	30.7	3.76561	-28.7462	-31.2946
2012-12-12 12:38:40	28.24	30.76	3.77255	-28.787	-31.3558	2012-12-12 12:38:40
2012-12-12 12:48:40	28.26	30.77	3.7795	-28.8073	-31.366
2012-12-12 12:58:40	28.25	30.74	3.78644	-28.7971	-31.3354
2012-12-12 13:08:40	28.31	30.82	3.79339	-28.8583	-31.4169
2012-12-12 13:18:40	28.32	30.84	3.80033	-28.8685	-31.4373
2012-12-12 13:28:40	28.39	30.91	3.80728	-28.9399	-31.5087
2012-12-12 13:38:40	28.43	30.94	3.81422	-28.9806	-31.5392	2012-12-12 13:38:40
2012-12-12 13:48:40	28.47	30.97	3.82117	-29.0214	-31.5698
2012-12-12 13:58:40	28.49	31	3.82811	-29.0418	-31.6004
2012-12-12 14:08:40	28.53	31.04	3.83505	-29.0826	-31.6412
2012-12-12 14:18:40	28.57	31.08	3.842	-29.1233	-31.682
2012-12-12 14:28:40	28.61	31.12	3.84894	-29.1641	-31.7227
2012-12-12 14:38:40	28.65	31.15	3.85589	-29.2049	-31.7533	2012-12-12 14:38:40
2012-12-12 14:48:40	28.66	31.16	3.86283	-29.2151	-31.7635
2012-12-12 14:58:40	28.69	31.21	3.86978	-29.2457	-31.8145
2012-12-12 15:08:40	28.74	31.25	3.87672	-29.2966	-31.8552
2012-12-12 15:18:40	28.78	31.26	3.88367	-29.3374	-31.8654
2012-12-12 15:28:40	28.81	31.31	3.89061	-29.368	-31.9164
2012-12-12 15:38:40	28.83	31.34	3.89755	-29.3884	-31.947	2012-12-12 15:38:40
2012-12-12 15:48:40	28.85	31.36	3.9045	-29.4088	-31.9674
2012-12-12 15:58:40	28.88	31.39	3.91144	-29.4393	-31.998
2012-12-12 16:08:40	28.89	31.41	3.91839	-29.4495	-32.0183
2012-12-12 16:18:40	28.89	31.4	3.92533	-29.4495	-32.0082
2012-12-12 16:28:40	28.95	31.46	3.93228	-29.5107	-32.0693
2012-12-12 16:38:40	28.98	31.5	3.93922	-29.5413	-32.1101	2012-12-12 16:38:40
2012-12-12 16:48:40	29.03	31.54	3.94617	-29.5923	-32.1509
2012-12-12 16:58:40	29.08	31.59	3.95311	-29.6432	-32.2018
2012-12-12 17:08:40	29.1	31.6	3.96005	-29.6636	-32.212
2012-12-12 17:18:40	29.13	31.61	3.967	-29.6942	-32.2222
2012-12-12 17:38:40	29.04	31.57	3.98089	-29.6024	-32.1814
2012-12-12 17:48:40	29.14	31.63	3.98783	-29.7044	-32.2426	2012-12-12 17:48:40
2012-12-12 17:58:40	29.17	31.66	3.99478	-29.735	-32.2732
2012-12-12 18:08:40	29.21	31.73	4.00172	-29.7757	-32.3445
2012-12-12 18:18:40	29.24	31.76	4.00867	-29.8063	-32.3751
2012-12-12 18:28:40	29.26	31.78	4.01561	-29.8267	-32.3955
2012-12-12 18:38:40	29.29	31.81	4.02255	-29.8573	-32.4261
2012-12-12 18:48:40	29.34	31.85	4.0295	-29.9083	-32.4669	2012-12-12 18:48:40
2012-12-12 18:58:40	29.38	31.9	4.03644	-29.949	-32.5178
2012-12-12 19:08:40	29.43	31.94	4.04339	-30	-32.5586
2012-12-12 19:18:40	29.45	31.97	4.05033	-30.0204	-32.5892
2012-12-12 19:28:40	29.48	32	4.05728	-30.051	-32.6198
2012-12-12 19:38:40	29.53	32	4.06422	-30.1019	-32.6198
2012-12-12 19:48:40	29.52	32.03	4.07117	-30.0917	-32.6504	2012-12-12 19:48:40
2012-12-12 19:58:40	29.58	32.1	4.07811	-30.1529	-32.7217
2012-12-12 20:08:40	29.6	32.11	4.08505	-30.1733	-32.7319
2012-12-12 20:18:40	29.61	32.12	4.092	-30.1835	-32.7421
2012-12-12 20:28:40	29.66	32.17	4.09894	-30.2345	-32.7931
2012-12-12 20:38:40	29.69	32.2	4.10589	-30.265	-32.8236
2012-12-12 20:48:40	29.72	32.21	4.11283	-30.2956	-32.8338	2012-12-12 20:48:40
2012-12-12 20:58:40	29.77	32.25	4.11978	-30.3466	-32.8746
2012-12-12 21:08:40	29.8	32.3	4.12672	-30.3772	-32.9256
2012-12-12 21:18:40	29.83	32.34	4.13367	-30.4077	-32.9664
2012-12-12 21:28:40	29.85	32.37	4.14061	-30.4281	-32.9969
2012-12-12 21:38:40	29.91	32.43	4.14755	-30.4893	-33.0581
2012-12-12 21:48:40	29.95	32.47	4.1545	-30.5301	-33.0989	2012-12-12 21:48:40
2012-12-12 21:58:40	29.96	32.47	4.16144	-30.5403	-33.0989
2012-12-12 22:08:40	30.01	32.53	4.16839	-30.5912	-33.16
2012-12-12 22:18:40	30.03	32.54	4.17533	-30.6116	-33.1702
2012-12-12 22:28:40	30.03	32.53	4.18228	-30.6116	-33.16
2012-12-12 22:38:40	30.08	32.59	4.18922	-30.6626	-33.2212
2012-12-12 22:48:40	30.12	32.64	4.19617	-30.7034	-33.2722	2012-12-12 22:48:40
2012-12-12 22:58:40	30.15	32.65	4.20311	-30.7339	-33.2824
2012-12-12 23:08:40	30.21	32.72	4.21005	-30.7951	-33.3537
2012-12-12 23:18:40	30.26	32.76	4.217	-30.8461	-33.3945
2012-12-12 23:28:40	30.28	32.8	4.22394	-30.8665	-33.4353
2012-12-12 23:38:40	30.3	32.77	4.23089	-30.8869	-33.4047
2012-12-12 23:48:40	30.34	32.86	4.23783	-30.9276	-33.4964	2012-12-12 23:48:40
2012-12-12 23:58:40	30.37	32.88	4.24478	-30.9582	-33.5168
2012-12-13 00:08:40	30.43	32.95	4.25172	-31.0194	-33.5882
2012-12-13 00:18:40	30.46	32.98	4.25867	-31.0499	-33.6188
2012-12-13 00:28:40	30.48	32.99	4.26561	-31.0703	-33.629
2012-12-13 00:38:40	30.53	33.03	4.27255	-31.1213	-33.6697
2012-12-13 00:48:40	30.55	33.06	4.2795	-31.1417	-33.7003	2012-12-13 00:48:40
2012-12-13 00:58:40	30.57	33.08	4.28644	-31.1621	-33.7207
2012-12-13 01:08:40	30.59	33.05	4.29339	-31.1825	-33.6901
2012-12-13 01:18:40	30.66	33.15	4.30033	-31.2538	-33.792
2012-12-13 01:28:40	30.68	33.2	4.30728	-31.2742	-33.843
2012-12-13 01:38:40	30.71	33.22	4.31422	-31.3048	-33.8634
2012-12-13 01:48:40	30.74	33.25	4.32117	-31.3354	-33.894	2012-12-13 01:48:40
2012-12-13 01:58:40	30.78	33.29	4.32811	-31.3761	-33.9348
2012-12-13 02:08:40	30.83	33.3	4.33505	-31.4271	-33.945
2012-12-13 02:18:40	30.79	33.31	4.342	-31.3863	-33.9551
2012-12-13 02:28:40	30.73	33.24	4.34894	-31.3252	-33.8838
2012-12-13 02:38:40	30.85	33.36	4.35589	-31.4475	-34.0061
2012-12-13 02:48:40	30.9	33.41	4.36283	-31.4985	-34.0571	2012-12-13 02:48:40
2012-12-13 02:58:40	30.89	33.4	4.36978	-31.4883	-34.0469
2012-12-13 03:08:40	30.93	33.45	4.37672	-31.5291	-34.0979
2012-12-13 03:18:40	30.96	33.48	4.38367	-31.5596	-34.1284
2012-12-13 03:28:40	31.01	33.52	4.39061	-31.6106	-34.1692
2012-12-13 03:38:40	31.01	33.52	4.39755	-31.6106	-34.1692
2012-12-13 03:48:40	31.08	33.56	4.4045	-31.682	-34.21	2012-12-13 03:48:40
2012-12-13 03:58:40	31.1	33.61	4.41144	-31.7023	-34.261
2012-12-13 04:08:40	31.12	33.63	4.41839	-31.7227	-34.2813
2012-12-13 04:18:40	31.17	33.65	4.42533	-31.7737	-34.3017
2012-12-13 04:28:40	31.13	33.64	4.43228	-31.7329	-34.2915
2012-12-13 04:38:40	31.19	33.71	4.43922	-31.7941	-34.3629
2012-12-13 04:48:40	31.25	33.76	4.44617	-31.8552	-34.4139	2012-12-13 04:48:40
2012-12-13 04:58:40	31.3	33.81	4.45311	-31.9062	-34.4648
2012-12-13 05:08:40	31.3	33.83	4.46005	-31.9062	-34.4852
2012-12-13 05:18:40	31.33	33.84	4.467	-31.9368	-34.4954
2012-12-13 05:28:40	31.35	33.86	4.47394	-31.9572	-34.5158
2012-12-13 05:38:40	31.4	33.91	4.48089	-32.0082	-34.5668
2012-12-13 05:48:40	31.44	33.95	4.48783	-32.0489	-34.6075	2012-12-13 05:48:40
2012-12-13 05:58:40	31.5	34.01	4.49478	-32.1101	-34.6687
2012-12-13 06:08:40	31.5	34.01	4.50172	-32.1101	-34.6687
2012-12-13 06:18:40	31.51	34.02	4.50867	-32.1203	-34.6789
2012-12-13 06:28:40	31.56	34.07	4.51561	-32.1713	-34.7299
2012-12-13 06:38:40	31.59	34.1	4.52255	-32.2018	-34.7604
2012-12-13 06:48:40	31.62	34.13	4.5295	-32.2324	-34.791	2012-12-13 06:48:40
2012-12-13 06:58:40	31.65	34.16	4.53644	-32.263	-34.8216
2012-12-13 07:08:40	31.7	34.21	4.54339	-32.314	-34.8726
2012-12-13 07:18:40	31.73	34.23	4.55033	-32.3445	-34.893
2012-12-13 07:28:40	31.76	34.27	4.55728	-32.3751	-34.9337
2012-12-13 07:38:40	31.81	34.31	4.56422	-32.4261	-34.9745
2012-12-13 07:48:40	31.86	34.34	4.57117	-32.4771	-35.0051	2012-12-13 07:48:40
2012-12-13 07:58:40	31.88	34.4	4.57811	-32.4975	-35.0663
2012-12-13 08:08:40	31.91	34.42	4.58505	-32.528	-35.0866
2012-12-13 08:18:40	31.93	34.45	4.592	-32.5484	-35.1172
2012-12-13 08:28:40	31.98	34.47	4.59894	-32.5994	-35.1376
2012-12-13 08:38:40	31.99	34.51	4.60589	-32.6096	-35.1784
2012-12-13 08:48:40	32.01	34.52	4.61283	-32.63	-35.1886	2012-12-13 08:48:40
2012-12-13 08:58:40	32.06	34.57	4.61978	-32.6809	-35.2396
2012-12-13 09:08:40	32.07	34.58	4.62672	-32.6911	-35.2497
2012-12-13 09:18:40	32.13	34.65	4.63367	-32.7523	-35.3211
2012-12-13 09:28:40	32.12	34.64	4.64061	-32.7421	-35.3109
2012-12-13 09:38:40	32.19	34.7	4.64755	-32.8135	-35.3721
2012-12-13 09:48:40	32.21	34.7	4.6545	-32.8338	-35.3721	2012-12-13 09:48:40
2012-12-13 09:58:40	31.91	34.42	4.66144	-32.528	-35.0866
2012-12-13 10:08:40	32.04	34.55	4.66839	-32.6606	-35.2192
2012-12-13 10:18:40	32.15	34.68	4.67533	-32.7727	-35.3517
2012-12-13 10:28:40	32.25	34.77	4.68228	-32.8746	-35.4434
2012-12-13 10:38:40	32.28	34.8	4.68922	-32.9052	-35.474
2012-12-13 10:48:40	32.35	34.83	4.69617	-32.9766	-35.5046	2012-12-13 10:48:40
2012-12-13 10:58:40	32.39	34.9	4.70311	-33.0173	-35.5759
2012-12-13 11:08:40	32.41	34.94	4.71005	-33.0377	-35.6167
2012-12-13 11:18:40	32.48	35	4.717	-33.1091	-35.6779
2012-12-13 11:28:40	32.51	35.02	4.72394	-33.1397	-35.6983
2012-12-13 11:38:40	32.55	35.07	4.73089	-33.1804	-35.7492
2012-12-13 11:48:40	32.57	35.08	4.73783	-33.2008	-35.7594	2012-12-13 11:48:40
2012-12-13 11:58:40	32.6	35.12	4.74478	-33.2314	-35.8002
2012-12-13 12:08:40	32.61	35.13	4.75172	-33.2416	-35.8104
2012-12-13 12:18:40	32.63	35.16	4.75867	-33.262	-35.841
2012-12-13 12:28:40	32.62	35.15	4.76561	-33.2518	-35.8308
2012-12-13 12:38:40	32.71	35.2	4.77255	-33.3435	-35.8818
2012-12-13 12:48:40	32.74	35.28	4.7795	-33.3741	-35.9633	2012-12-13 12:48:40
2012-12-13 12:58:40	32.47	34.97	4.78644	-33.0989	-35.6473
2012-12-13 13:08:40	32.64	35.16	4.79339	-33.2722	-35.841
2012-12-13 13:18:40	32.64	35.15	4.80033	-33.2722	-35.8308
2012-12-13 13:28:40	32.41	34.95	4.80728	-33.0377	-35.6269
2012-12-13 13:38:40	32.66	35.19	4.81422	-33.2926	-35.8716
2012-12-13 13:48:40	32.75	35.23	4.82117	-33.3843	-35.9123	2012-12-13 13:48:40
2012-12-13 13:58:40	32.81	35.34	4.82811	-33.4455	-36.0245
2012-12-13 14:08:40	32.61	35.16	4.83505	-33.2416	-35.841
2012-12-13 14:18:40	32.77	35.28	4.842	-33.4047	-35.9633
2012-12-13 14:28:40	32.86	35.39	4.84894	-33.4964	-36.0754
2012-12-13 14:38:40	32.91	35.44	4.85589	-33.5474	-36.1264
2012-12-13 14:48:40	32.92	35.45	4.86283	-33.5576	-36.1366	2012-12-13 14:48:40
2012-12-13 14:58:40	33.01	35.53	4.86978	-33.6493	-36.2181
2012-12-13 15:08:40	33.05	35.58	4.87672	-33.6901	-36.2691
2012-12-13 15:18:40	33.12	35.65	4.88367	-33.7615	-36.3405
2012-12-13 15:28:40	33.15	35.68	4.89061	-33.792	-36.371
2012-12-13 15:38:40	33.22	35.74	4.89755	-33.8634	-36.4322
2012-12-13 15:48:40	33.28	35.81	4.9045	-33.9246	-36.5036	2012-12-13 15:48:40
2012-12-13 15:58:40	33.29	35.8	4.91144	-33.9348	-36.4934
2012-12-13 16:08:40	33.38	35.86	4.91839	-34.0265	-36.5545
2012-12-13 16:18:40	33.41	35.95	4.92533	-34.0571	-36.6463
2012-12-13 16:28:40	33.47	36.01	4.93228	-34.1182	-36.7074
2012-12-13 16:38:40	33.51	36.03	4.93922	-34.159	-36.7278
2012-12-13 16:48:40	33.6	36.12	4.94617	-34.2508	-36.8196	2012-12-13 16:48:40
2012-12-13 16:58:40	33.65	36.18	4.95311	-34.3017	-36.8807
2012-12-13 17:08:40	33.7	36.22	4.96005	-34.3527	-36.9215
2012-12-13 17:18:40	33.75	36.27	4.967	-34.4037	-36.9725
2012-12-13 17:28:40	33.84	36.36	4.97394	-34.4954	-37.0642
2012-12-13 17:38:40	33.87	36.4	4.98089	-34.526	-37.105
2012-12-13 17:48:40	33.93	36.45	4.98783	-34.5872	-37.156	2012-12-13 17:48:40
2012-12-13 17:58:40	33.98	36.49	4.99478	-34.6381	-37.1967
2012-12-13 18:08:40	34.03	36.56	5.00172	-34.6891	-37.2681
2012-12-13 18:18:40	34.09	36.63	5.00867	-34.7503	-37.3394
2012-12-13 18:28:40	34.15	36.67	5.01561	-34.8114	-37.3802
2012-12-13 18:38:40	34.22	36.75	5.02255	-34.8828	-37.4618
2012-12-13 18:48:40	34.28	36.8	5.0295	-34.9439	-37.5127	2012-12-13 18:48:40
2012-12-13 18:58:40	34.33	36.86	5.03644	-34.9949	-37.5739
2012-12-13 19:08:40	34.39	36.88	5.04339	-35.0561	-37.5943
2012-12-13 19:18:40	34.45	36.98	5.05033	-35.1172	-37.6962
2012-12-13 19:28:40	34.47	36.99	5.05728	-35.1376	-37.7064
2012-12-13 19:38:40	34.53	37.05	5.06422	-35.1988	-37.7676
2012-12-13 19:48:40	34.56	37.08	5.07117	-35.2294	-37.7982	2012-12-13 19:48:40
2012-12-13 19:58:40	34.62	37.15	5.07811	-35.2905	-37.8695
2012-12-13 20:08:40	34.7	37.22	5.08505	-35.3721	-37.9409
2012-12-13 20:18:40	34.69	37.22	5.092	-35.3619	-37.9409
2012-12-13 20:28:40	34.8	37.31	5.09894	-35.474	-38.0326
2012-12-13 20:38:40	34.84	37.36	5.10589	-35.5148	-38.0836
2012-12-13 20:48:40	34.89	37.41	5.11283	-35.5657	-38.1346	2012-12-13 20:48:40
2012-12-13 20:58:40	34.95	37.46	5.11978	-35.6269	-38.1855
2012-12-13 21:08:40	34.98	37.5	5.12672	-35.6575	-38.2263
2012-12-13 21:18:40	35.02	37.54	5.13367	-35.6983	-38.2671
2012-12-13 21:28:40	35.07	37.6	5.14061	-35.7492	-38.3282
2012-12-13 21:38:40	35.13	37.66	5.14755	-35.8104	-38.3894
2012-12-13 21:48:40	35.18	37.7	5.1545	-35.8614	-38.4302	2012-12-13 21:48:40
2012-12-13 21:58:40	35.26	37.78	5.16144	-35.9429	-38.5117
2012-12-13 22:08:40	35.21	37.67	5.16839	-35.8919	-38.3996
2012-12-13 22:18:40	35.27	37.77	5.17533	-35.9531	-38.5015
2012-12-13 22:28:40	35.31	37.81	5.18228	-35.9939	-38.5423
2012-12-13 22:38:40	35.36	37.87	5.18922	-36.0449	-38.6035
2012-12-13 22:48:40	35.43	37.93	5.19617	-36.1162	-38.6646	2012-12-13 22:48:40
2012-12-13 22:58:40	35.47	37.97	5.20311	-36.157	-38.7054
2012-12-13 23:08:40	35.5	37.99	5.21005	-36.1876	-38.7258
2012-12-13 23:18:40	35.55	38.05	5.217	-36.2385	-38.787
2012-12-13 23:28:40	35.61	38.1	5.22394	-36.2997	-38.8379
2012-12-13 23:38:40	35.68	38.16	5.23089	-36.371	-38.8991
2012-12-13 23:48:40	35.72	38.21	5.23783	-36.4118	-38.9501	2012-12-13 23:48:40
2012-12-13 23:58:40	35.77	38.26	5.24478	-36.4628	-39.001
2012-12-14 00:08:40	35.84	38.33	5.25172	-36.5341	-39.0724
2012-12-14 00:18:40	35.86	38.36	5.25867	-36.5545	-39.103
2012-12-14 00:28:40	35.9	38.37	5.26561	-36.5953	-39.1131
2012-12-14 00:38:40	35.93	38.38	5.27255	-36.6259	-39.1233
2012-12-14 00:48:40	35.96	38.46	5.2795	-36.6565	-39.2049	2012-12-14 00:48:40
2012-12-14 00:58:40	36.03	38.53	5.28644	-36.7278	-39.2762
2012-12-14 01:08:40	36.03	38.53	5.29339	-36.7278	-39.2762
2012-12-14 01:18:40	36.06	38.55	5.30033	-36.7584	-39.2966
2012-12-14 01:28:40	36.13	38.61	5.30728	-36.8298	-39.3578
2012-12-14 01:38:40	36.18	38.67	5.31422	-36.8807	-39.419
2012-12-14 01:48:40	36.23	38.72	5.32117	-36.9317	-39.4699	2012-12-14 01:48:40
2012-12-14 01:58:40	36.29	38.78	5.32811	-36.9929	-39.5311
2012-12-14 02:08:40	36.34	38.84	5.33505	-37.0438	-39.5923
2012-12-14 02:18:40	36.37	38.87	5.342	-37.0744	-39.6228
2012-12-14 02:28:40	36.43	38.94	5.34894	-37.1356	-39.6942
2012-12-14 02:38:40	36.5	39	5.35589	-37.2069	-39.7554
2012-12-14 02:48:40	36.56	39.03	5.36283	-37.2681	-39.7859	2012-12-14 02:48:40
2012-12-14 02:58:40	36.59	39.05	5.36978	-37.2987	-39.8063
2012-12-14 03:08:40	36.65	39.14	5.37672	-37.3598	-39.8981
2012-12-14 03:18:40	36.7	39.19	5.38367	-37.4108	-39.949
2012-12-14 03:28:40	36.76	39.25	5.39061	-37.472	-40.0102
2012-12-14 03:38:40	36.78	39.28	5.39755	-37.4924	-40.0408
2012-12-14 03:48:40	36.86	39.31	5.4045	-37.5739	-40.0714	2012-12-14 03:48:40
2012-12-14 03:58:40	36.89	39.39	5.41144	-37.6045	-40.1529
2012-12-14 04:08:40	36.95	39.45	5.41839	-37.6656	-40.2141
2012-12-14 04:18:40	36.98	39.48	5.42533	-37.6962	-40.2446
2012-12-14 04:28:40	37.04	39.53	5.43228	-37.7574	-40.2956
2012-12-14 04:38:40	37.07	39.56	5.43922	-37.788	-40.3262
2012-12-14 04:48:40	37.12	39.62	5.44617	-37.8389	-40.3874	2012-12-14 04:48:40
2012-12-14 04:58:40	37.15	39.64	5.45311	-37.8695	-40.4077
2012-12-14 05:08:40	37.23	39.73	5.46005	-37.9511	-40.4995
2012-12-14 05:18:40	37.27	39.74	5.467	-37.9918	-40.5097
2012-12-14 05:28:40	37.3	39.8	5.47394	-38.0224	-40.5708
2012-12-14 05:38:40	37.37	39.8	5.48089	-38.0938	-40.5708
2012-12-14 05:48:40	37.4	39.9	5.48783	-38.1244	-40.6728	2012-12-14 05:48:40
2012-12-14 05:58:40	37.44	39.94	5.49478	-38.1651	-40.7136
2012-12-14 06:08:40	37.5	39.97	5.50172	-38.2263	-40.7441
2012-12-14 06:18:40	37.53	40.03	5.50867	-38.2569	-40.8053
2012-12-14 06:28:40	37.58	40.09	5.51561	-38.3078	-40.8665
2012-12-14 06:38:40	37.64	40.14	5.52255	-38.369	-40.9174
2012-12-14 06:48:40	37.69	40.2	5.5295	-38.42	-40.9786	2012-12-14 06:48:40
2012-12-14 06:58:40	37.75	40.25	5.53644	-38.4811	-41.0296
2012-12-14 07:08:40	37.81	40.31	5.54339	-38.5423	-41.0907
2012-12-14 07:18:40	37.83	40.33	5.55033	-38.5627	-41.1111
2012-12-14 07:28:40	37.89	40.4	5.55728	-38.6239	-41.1825
2012-12-14 07:38:40	37.95	40.46	5.56422	-38.685	-41.2436
2012-12-14 07:48:40	38.01	40.47	5.57117	-38.7462	-41.2538	2012-12-14 07:48:40
2012-12-14 07:58:40	38.01	40.51	5.57811	-38.7462	-41.2946
2012-12-14 08:08:40	37.98	40.49	5.58505	-38.7156	-41.2742
2012-12-14 08:18:40	37.99	40.52	5.592	-38.7258	-41.3048
2012-12-14 08:28:40	38.02	40.55	5.59894	-38.7564	-41.3354
2012-12-14 08:38:40	38.06	40.57	5.60589	-38.7971	-41.3558
2012-12-14 08:48:40	38.08	40.59	5.61283	-38.8175	-41.3761	2012-12-14 08:48:40
2012-12-14 08:58:40	38.14	40.65	5.61978	-38.8787	-41.4373
2012-12-14 09:08:40	38.16	40.67	5.62672	-38.8991	-41.4577
2012-12-14 09:18:40	38.17	40.66	5.63367	-38.9093	-41.4475
2012-12-14 09:28:40	38.08	40.61	5.64061	-38.8175	-41.3965
2012-12-14 09:38:40	38.21	40.74	5.64755	-38.9501	-41.5291
2012-12-14 09:48:40	38.28	40.8	5.6545	-39.0214	-41.5902	2012-12-14 09:48:40
2012-12-14 09:58:40	38.32	40.82	5.66144	-39.0622	-41.6106
2012-12-14 10:08:40	38.39	40.9	5.66839	-39.1335	-41.6922
2012-12-14 10:18:40	38.43	40.95	5.67533	-39.1743	-41.7431
2012-12-14 10:28:40	38.52	41	5.68228	-39.2661	-41.7941
2012-12-14 10:38:40	38.55	41.07	5.68922	-39.2966	-41.8654
2012-12-14 10:48:40	38.57	41.09	5.69617	-39.317	-41.8858	2012-12-14 10:48:40
2012-12-14 10:58:40	38.62	41.13	5.70311	-39.368	-41.9266
2012-12-14 11:08:40	38.66	41.18	5.71005	-39.4088	-41.9776
2012-12-14 11:18:40	38.7	41.22	5.717	-39.4495	-42.0183
2012-12-14 11:28:40	38.73	41.24	5.72394	-39.4801	-42.0387
2012-12-14 11:38:40	38.78	41.29	5.73089	-39.5311	-42.0897
2012-12-14 11:48:40	38.84	41.35	5.73783	-39.5923	-42.1509	2012-12-14 11:48:40
2012-12-14 11:58:40	38.87	41.39	5.74478	-39.6228	-42.1916
2012-12-14 12:08:40	38.91	41.44	5.75172	-39.6636	-42.2426
2012-12-14 12:18:40	38.91	41.41	5.75867	-39.6636	-42.212
2012-12-14 12:28:40	38.98	41.5	5.76561	-39.735	-42.3038
2012-12-14 12:38:40	39.02	41.53	5.77255	-39.7757	-42.3344
2012-12-14 12:48:40	39	41.52	5.7795	-39.7554	-42.3242	2012-12-14 12:48:40
2012-12-14 12:58:40	39.07	41.58	5.78644	-39.8267	-42.3853
2012-12-14 13:08:40	39.13	41.66	5.79339	-39.8879	-42.4669
2012-12-14 13:18:40	39.17	41.69	5.80033	-39.9286	-42.4975
2012-12-14 13:28:40	39.25	41.77	5.80728	-40.0102	-42.579
2012-12-14 13:38:40	39.3	41.82	5.81422	-40.0612	-42.63
2012-12-14 13:48:40	39.35	41.86	5.82117	-40.1121	-42.6707	2012-12-14 13:48:40
2012-12-14 13:58:40	39.41	41.92	5.82811	-40.1733	-42.7319
2012-12-14 14:08:40	39.44	41.95	5.83505	-40.2039	-42.7625
2012-12-14 14:18:40	39.49	42.01	5.842	-40.2548	-42.8236
2012-12-14 14:28:40	39.55	42.07	5.84894	-40.316	-42.8848
2012-12-14 14:38:40	39.6	42.11	5.85589	-40.367	-42.9256
2012-12-14 14:48:40	39.66	42.14	5.86283	-40.4281	-42.9562	2012-12-14 14:48:40
2012-12-14 14:58:40	39.7	42.22	5.86978	-40.4689	-43.0377
2012-12-14 15:08:40	39.75	42.27	5.87672	-40.5199	-43.0887
2012-12-14 15:18:40	39.8	42.3	5.88367	-40.5708	-43.1193
2012-12-14 15:28:40	39.83	42.35	5.89061	-40.6014	-43.1702
2012-12-14 15:38:40	39.88	42.4	5.89755	-40.6524	-43.2212
2012-12-14 15:48:40	39.93	42.45	5.9045	-40.7034	-43.2722	2012-12-14 15:48:40
2012-12-14 15:58:40	39.97	42.49	5.91144	-40.7441	-43.3129
2012-12-14 16:08:40	40.02	42.53	5.91839	-40.7951	-43.3537
2012-12-14 16:18:40	40.12	42.62	5.92533	-40.897	-43.4455
2012-12-14 16:28:40	40.14	42.64	5.93228	-40.9174	-43.4659
2012-12-14 16:38:40	40.21	42.72	5.93922	-40.9888	-43.5474
2012-12-14 16:48:40	40.26	42.77	5.94617	-41.0398	-43.5984	2012-12-14 16:48:40
2012-12-14 16:58:40	40.32	42.84	5.95311	-41.1009	-43.6697
2012-12-14 17:08:40	40.39	42.89	5.96005	-41.1723	-43.7207
2012-12-14 17:18:40	40.43	42.93	5.967	-41.213	-43.7615
2012-12-14 17:28:40	40.48	42.99	5.97394	-41.264	-43.8226
2012-12-14 17:38:40	40.54	43.05	5.98089	-41.3252	-43.8838
2012-12-14 17:48:40	40.59	43.1	5.98783	-41.3761	-43.9348	2012-12-14 17:48:40
2012-12-14 17:58:40	40.65	43.16	5.99478	-41.4373	-43.9959
2012-12-14 18:08:40	40.73	43.23	6.00172	-41.5189	-44.0673
2012-12-14 18:18:40	40.81	43.3	6.00867	-41.6004	-44.1386
2012-12-14 18:28:40	40.84	43.35	6.01561	-41.631	-44.1896
2012-12-14 18:38:40	40.92	43.44	6.02255	-41.7125	-44.2813
2012-12-14 18:48:40	40.79	43.27	6.0295	-41.58	-44.1081	2012-12-14 18:48:40
2012-12-14 18:58:40	40.78	43.27	6.03644	-41.5698	-44.1081
2012-12-14 19:08:40	40.94	43.45	6.04339	-41.7329	-44.2915
2012-12-14 19:18:40	41.01	43.55	6.05033	-41.8043	-44.3935
2012-12-14 19:28:40	41.11	43.63	6.05728	-41.9062	-44.475
2012-12-14 19:38:40	41.17	43.69	6.06422	-41.9674	-44.5362
2012-12-14 19:48:40	41.22	43.74	6.07117	-42.0183	-44.5872	2012-12-14 19:48:40
2012-12-14 19:58:40	41.31	43.81	6.07811	-42.1101	-44.6585
2012-12-14 20:08:40	41.24	43.74	6.08505	-42.0387	-44.5872
2012-12-14 20:18:40	41.35	43.85	6.092	-42.1509	-44.6993
2012-12-14 20:28:40	41.44	43.94	6.09894	-42.2426	-44.791
2012-12-14 20:38:40	41.51	44.02	6.10589	-42.314	-44.8726
2012-12-14 20:48:40	41.57	44.05	6.11283	-42.3751	-44.9032	2012-12-14 20:48:40
2012-12-14 20:58:40	41.66	44.15	6.11978	-42.4669	-45.0051
2012-12-14 21:08:40	41.74	44.23	6.12672	-42.5484	-45.0866
2012-12-14 21:18:40	41.82	44.32	6.13367	-42.63	-45.1784
2012-12-14 21:28:40	41.89	44.38	6.14061	-42.7013	-45.2396
2012-12-14 21:38:40	41.99	44.44	6.14755	-42.8033	-45.3007
2012-12-14 21:48:40	42.05	44.54	6.1545	-42.8644	-45.4027	2012-12-14 21:48:40
2012-12-14 21:58:40	42.12	44.62	6.16144	-42.9358	-45.4842
2012-12-14 22:08:40	42.2	44.65	6.16839	-43.0173	-45.5148
2012-12-14 22:18:40	42.24	44.74	6.17533	-43.0581	-45.6065
2012-12-14 22:28:40	42.32	44.78	6.18228	-43.1397	-45.6473
2012-12-14 22:38:40	42.37	44.86	6.18922	-43.1906	-45.7288
2012-12-14 22:48:40	42.48	44.97	6.19617	-43.3028	-45.841	2012-12-14 22:48:40
2012-12-14 22:58:40	42.53	45.03	6.20311	-43.3537	-45.9021
2012-12-14 23:08:40	42.62	45.08	6.21005	-43.4455	-45.9531
2012-12-14 23:18:40	42.67	45.16	6.217	-43.4964	-46.0347
2012-12-14 23:28:40	42.72	45.22	6.22394	-43.5474	-46.0958
2012-12-14 23:38:40	42.79	45.28	6.23089	-43.6188	-46.157
2012-12-14 23:48:40	42.86	45.36	6.23783	-43.6901	-46.2385	2012-12-14 23:48:40
2012-12-14 23:58:40	42.91	45.41	6.24478	-43.7411	-46.2895
2012-12-15 00:08:40	43	45.49	6.25172	-43.8328	-46.371
2012-12-15 00:18:40	43.05	45.54	6.25867	-43.8838	-46.422
2012-12-15 00:28:40	43.13	45.63	6.26561	-43.9653	-46.5138
2012-12-15 00:38:40	43.18	45.67	6.27255	-44.0163	-46.5545
2012-12-15 00:48:40	43.26	45.73	6.2795	-44.0979	-46.6157	2012-12-15 00:48:40
2012-12-15 00:58:40	43.29	45.79	6.28644	-44.1284	-46.6769
2012-12-15 01:08:40	43.37	45.87	6.29339	-44.21	-46.7584
2012-12-15 01:18:40	43.46	45.95	6.30033	-44.3017	-46.84
2012-12-15 01:28:40	43.5	46	6.30728	-44.3425	-46.8909
2012-12-15 01:38:40	43.56	46.06	6.31422	-44.4037	-46.9521
2012-12-15 01:48:40	43.63	46.13	6.32117	-44.475	-47.0234	2012-12-15 01:48:40
2012-12-15 01:58:40	43.69	46.19	6.32811	-44.5362	-47.0846
2012-12-15 02:08:40	43.79	46.29	6.33505	-44.6381	-47.1865
2012-12-15 02:18:40	43.85	46.35	6.342	-44.6993	-47.2477
2012-12-15 02:28:40	43.9	46.4	6.34894	-44.7503	-47.2987
2012-12-15 02:38:40	43.98	46.47	6.35589	-44.8318	-47.37
2012-12-15 02:48:40	44.03	46.53	6.36283	-44.8828	-47.4312	2012-12-15 02:48:40
2012-12-15 02:58:40	44.09	46.6	6.36978	-44.9439	-47.5025
2012-12-15 03:08:40	44.17	46.66	6.37672	-45.0255	-47.5637
2012-12-15 03:18:40	44.24	46.72	6.38367	-45.0968	-47.6249
2012-12-15 03:28:40	44.3	46.8	6.39061	-45.158	-47.7064
2012-12-15 03:38:40	44.35	46.85	6.39755	-45.209	-47.7574
2012-12-15 03:48:40	44.43	46.93	6.4045	-45.2905	-47.8389	2012-12-15 03:48:40
2012-12-15 03:58:40	44.52	46.99	6.41144	-45.3823	-47.9001
2012-12-15 04:08:40	44.55	47.06	6.41839	-45.4128	-47.9715
2012-12-15 04:18:40	44.63	47.13	6.42533	-45.4944	-48.0428
2012-12-15 04:28:40	44.69	47.19	6.43228	-45.5556	-48.104
2012-12-15 04:38:40	44.76	47.26	6.43922	-45.6269	-48.1753
2012-12-15 04:48:40	44.83	47.33	6.44617	-45.6983	-48.2467	2012-12-15 04:48:40
2012-12-15 04:58:40	44.87	47.37	6.45311	-45.739	-48.2875
2012-12-15 05:08:40	44.95	47.45	6.46005	-45.8206	-48.369
2012-12-15 05:18:40	45.02	47.53	6.467	-45.8919	-48.4506
2012-12-15 05:28:40	45.08	47.58	6.47394	-45.9531	-48.5015
2012-12-15 05:38:40	45.14	47.64	6.48089	-46.0143	-48.5627
2012-12-15 05:48:40	45.2	47.7	6.48783	-46.0754	-48.6239	2012-12-15 05:48:40
2012-12-15 05:58:40	45.29	47.8	6.49478	-46.1672	-48.7258
2012-12-15 06:08:40	45.35	47.85	6.50172	-46.2283	-48.7768
2012-12-15 06:18:40	45.43	47.94	6.50867	-46.3099	-48.8685
2012-12-15 06:28:40	45.5	48.01	6.51561	-46.3812	-48.9399
2012-12-15 06:38:40	45.57	48.08	6.52255	-46.4526	-49.0112
2012-12-15 06:48:40	45.63	48.15	6.5295	-46.5138	-49.0826	2012-12-15 06:48:40
2012-12-15 06:58:40	45.67	48.18	6.53644	-46.5545	-49.1131
2012-12-15 07:08:40	45.75	48.27	6.54339	-46.6361	-49.2049
2012-12-15 07:18:40	45.82	48.32	6.55033	-46.7074	-49.2559
2012-12-15 07:28:40	45.88	48.39	6.55728	-46.7686	-49.3272
2012-12-15 07:38:40	45.96	48.49	6.56422	-46.8502	-49.4292
2012-12-15 07:48:40	46.04	48.55	6.57117	-46.9317	-49.4903	2012-12-15 07:48:40
2012-12-15 07:58:40	46.1	48.61	6.57811	-46.9929	-49.5515
2012-12-15 08:08:40	46.17	48.67	6.58505	-47.0642	-49.6126
2012-12-15 08:18:40	46.24	48.71	6.592	-47.1356	-49.6534
2012-12-15 08:28:40	46.32	48.78	6.59894	-47.2171	-49.7248
2012-12-15 08:38:40	46.35	48.85	6.60589	-47.2477	-49.7961
2012-12-15 08:48:40	46.41	48.93	6.61283	-47.3089	-49.8777	2012-12-15 08:48:40
2012-12-15 08:58:40	46.49	49	6.61978	-47.3904	-49.949
2012-12-15 09:08:40	46.57	49.07	6.62672	-47.472	-50.0204
2012-12-15 09:18:40	46.61	49.12	6.63367	-47.5127	-50.0714
2012-12-15 09:28:40	46.69	49.2	6.64061	-47.5943	-50.1529
2012-12-15 09:38:40	46.76	49.24	6.64755	-47.6656	-50.1937
2012-12-15 09:48:40	46.85	49.32	6.6545	-47.7574	-50.2752	2012-12-15 09:48:40
2012-12-15 09:58:40	46.89	49.4	6.66144	-47.7982	-50.3568
2012-12-15 10:08:40	46.95	49.47	6.66839	-47.8593	-50.4281
2012-12-15 10:18:40	47.03	49.54	6.67533	-47.9409	-50.4995
2012-12-15 10:28:40	47.1	49.61	6.68228	-48.0122	-50.5708
2012-12-15 10:38:40	47.18	49.69	6.68922	-48.0938	-50.6524
2012-12-15 10:48:40	47.25	49.72	6.69617	-48.1651	-50.683	2012-12-15 10:48:40
2012-12-15 10:58:40	47.3	49.81	6.70311	-48.2161	-50.7747
2012-12-15 11:08:40	47.37	49.87	6.71005	-48.2875	-50.8359
2012-12-15 11:18:40	47.43	49.94	6.717	-48.3486	-50.9072
2012-12-15 11:28:40	47.49	49.99	6.72394	-48.4098	-50.9582
2012-12-15 11:38:40	47.53	50.03	6.73089	-48.4506	-50.999
2012-12-15 11:48:40	47.15	49.68	6.73783	-48.0632	-50.6422	2012-12-15 11:48:40
2012-12-15 11:58:40	47.42	49.93	6.74478	-48.3384	-50.897
2012-12-15 12:08:40	47.56	50.08	6.75172	-48.4811	-51.0499
2012-12-15 12:18:40	47.65	50.16	6.75867	-48.5729	-51.1315
2012-12-15 12:28:40	47.7	50.23	6.76561	-48.6239	-51.2029
2012-12-15 12:38:40	47.78	50.29	6.77255	-48.7054	-51.264
2012-12-15 12:48:40	47.88	50.35	6.7795	-48.8073	-51.3252	2012-12-15 12:48:40
2012-12-15 12:58:40	47.93	50.44	6.78644	-48.8583	-51.4169
2012-12-15 13:08:40	48.01	50.52	6.79339	-48.9399	-51.4985
2012-12-15 13:18:40	48.09	50.59	6.80033	-49.0214	-51.5698
2012-12-15 13:28:40	48.17	50.68	6.80728	-49.103	-51.6616
2012-12-15 13:38:40	48.24	50.75	6.81422	-49.1743	-51.7329
2012-12-15 13:48:40	48.32	50.82	6.82117	-49.2559	-51.8043	2012-12-15 13:48:40
2012-12-15 13:58:40	48.39	50.86	6.82811	-49.3272	-51.8451
2012-12-15 14:08:40	48.43	50.93	6.83505	-49.368	-51.9164
2012-12-15 14:18:40	48.52	51.02	6.842	-49.4597	-52.0082
2012-12-15 14:28:40	48.58	51.1	6.84894	-49.5209	-52.0897
2012-12-15 14:38:40	48.66	51.18	6.85589	-49.6024	-52.1713
2012-12-15 14:48:40	48.74	51.25	6.86283	-49.684	-52.2426	2012-12-15 14:48:40
2012-12-15 14:58:40	48.82	51.29	6.86978	-49.7655	-52.2834
2012-12-15 15:08:40	48.88	51.4	6.87672	-49.8267	-52.3955
2012-12-15 15:18:40	48.96	51.48	6.88367	-49.9083	-52.4771
2012-12-15 15:28:40	49.02	51.53	6.89061	-49.9694	-52.528
2012-12-15 15:38:40	49.11	51.61	6.89755	-50.0612	-52.6096
2012-12-15 15:48:40	49.18	51.69	6.9045	-50.1325	-52.6911	2012-12-15 15:48:40
2012-12-15 15:58:40	49.25	51.76	6.91144	-50.2039	-52.7625
2012-12-15 16:08:40	49.33	51.84	6.91839	-50.2854	-52.844
2012-12-15 16:18:40	49.38	51.9	6.92533	-50.3364	-52.9052
2012-12-15 16:28:40	49.49	52	6.93228	-50.4485	-53.0071
2012-12-15 16:38:40	49.55	52.01	6.93922	-50.5097	-53.0173
2012-12-15 16:48:40	49.62	52.15	6.94617	-50.581	-53.16	2012-12-15 16:48:40
2012-12-15 16:58:40	49.69	52.2	6.95311	-50.6524	-53.211
2012-12-15 17:08:40	49.77	52.29	6.96005	-50.7339	-53.3028
2012-12-15 17:18:40	49.86	52.37	6.967	-50.8257	-53.3843
2012-12-15 17:28:40	49.91	52.43	6.97394	-50.8767	-53.4455
2012-12-15 17:38:40	50.01	52.52	6.98089	-50.9786	-53.5372
2012-12-15 17:48:40	50.06	52.57	6.98783	-51.0296	-53.5882	2012-12-15 17:48:40
2012-12-15 17:58:40	50.15	52.66	6.99478	-51.1213	-53.6799
2012-12-15 18:08:40	50.23	52.74	7.00172	-51.2029	-53.7615
2012-12-15 18:18:40	50.32	52.84	7.00867	-51.2946	-53.8634
2012-12-15 18:28:40	50.4	52.91	7.01561	-51.3761	-53.9348
2012-12-15 18:38:40	50.49	53	7.02255	-51.4679	-54.0265
2012-12-15 18:48:40	50.59	53.1	7.0295	-51.5698	-54.1284	2012-12-15 18:48:40
2012-12-15 18:58:40	50.67	53.18	7.03644	-51.6514	-54.21
2012-12-15 19:08:40	50.75	53.27	7.04339	-51.7329	-54.3017
2012-12-15 19:18:40	50.87	53.38	7.05033	-51.8552	-54.4139
2012-12-15 19:28:40	50.98	53.49	7.05728	-51.9674	-54.526
2012-12-15 19:38:40	51.07	53.59	7.06422	-52.0591	-54.6279
2012-12-15 19:48:40	51.17	53.68	7.07117	-52.1611	-54.7197	2012-12-15 19:48:40
2012-12-15 19:58:40	51.28	53.79	7.07811	-52.2732	-54.8318
2012-12-15 20:08:40	51.37	53.89	7.08505	-52.3649	-54.9337
2012-12-15 20:18:40	51.46	53.96	7.092	-52.4567	-55.0051
2012-12-15 20:28:40	51.55	54.06	7.09894	-52.5484	-55.107
2012-12-15 20:38:40	51.64	54.14	7.10589	-52.6402	-55.1886
2012-12-15 20:48:40	51.72	54.24	7.11283	-52.7217	-55.2905	2012-12-15 20:48:40
2012-12-15 20:58:40	51.83	54.34	7.11978	-52.8338	-55.3925
2012-12-15 21:08:40	51.92	54.43	7.12672	-52.9256	-55.4842
2012-12-15 21:18:40	52.02	54.53	7.13367	-53.0275	-55.5861
2012-12-15 21:28:40	52.11	54.61	7.14061	-53.1193	-55.6677
2012-12-15 21:38:40	52.22	54.73	7.14755	-53.2314	-55.79
2012-12-15 21:48:40	52.3	54.82	7.1545	-53.3129	-55.8818	2012-12-15 21:48:40
2012-12-15 21:58:40	52.4	54.91	7.16144	-53.4149	-55.9735
2012-12-15 22:08:40	52.5	55.02	7.16839	-53.5168	-56.0856
2012-12-15 22:18:40	52.61	55.11	7.17533	-53.629	-56.1774
2012-12-15 22:28:40	52.69	55.21	7.18228	-53.7105	-56.2793
2012-12-15 22:38:40	52.77	55.29	7.18922	-53.792	-56.3609
2012-12-15 22:48:40	52.88	55.41	7.19617	-53.9042	-56.4832	2012-12-15 22:48:40
2012-12-15 22:58:40	52.98	55.5	7.20311	-54.0061	-56.5749
2012-12-15 23:08:40	53.07	55.59	7.21005	-54.0979	-56.6667
2012-12-15 23:18:40	53.16	55.66	7.217	-54.1896	-56.738
2012-12-15 23:28:40	53.26	55.78	7.22394	-54.2915	-56.8603
2012-12-15 23:38:40	53.37	55.88	7.23089	-54.4037	-56.9623
2012-12-15 23:48:40	53.46	55.98	7.23783	-54.4954	-57.0642	2012-12-15 23:48:40
2012-12-15 23:58:40	53.57	56.08	7.24478	-54.6075	-57.1662
2012-12-16 00:08:40	53.65	56.17	7.25172	-54.6891	-57.2579
2012-12-16 00:18:40	53.74	56.26	7.25867	-54.7808	-57.3496
2012-12-16 00:28:40	53.84	56.36	7.26561	-54.8828	-57.4516
2012-12-16 00:38:40	53.94	56.46	7.27255	-54.9847	-57.5535
2012-12-16 00:48:40	54.05	56.56	7.2795	-55.0968	-57.6555	2012-12-16 00:48:40
2012-12-16 00:58:40	54.12	56.65	7.28644	-55.1682	-57.7472
2012-12-16 01:08:40	54.26	56.76	7.29339	-55.3109	-57.8593
2012-12-16 01:18:40	54.35	56.87	7.30033	-55.4027	-57.9715
2012-12-16 01:28:40	54.4	56.93	7.30728	-55.4536	-58.0326
2012-12-16 01:38:40	54.52	57.04	7.31422	-55.5759	-58.1448
2012-12-16 01:48:40	54.62	57.14	7.32117	-55.6779	-58.2467	2012-12-16 01:48:40
2012-12-16 01:58:40	54.75	57.27	7.32811	-55.8104	-58.3792
2012-12-16 02:08:40	54.86	57.34	7.33505	-55.9225	-58.4506
2012-12-16 02:18:40	54.97	57.49	7.342	-56.0347	-58.6035
2012-12-16 02:28:40	55.03	57.57	7.34894	-56.0958	-58.685
2012-12-16 02:38:40	55.15	57.68	7.35589	-56.2181	-58.7971
2012-12-16 02:48:40	55.27	57.78	7.36283	-56.3405	-58.8991	2012-12-16 02:48:40
2012-12-16 02:58:40	55.34	57.86	7.36978	-56.4118	-58.9806
2012-12-16 03:08:40	55.48	57.96	7.37672	-56.5545	-59.0826
2012-12-16 03:18:40	55.56	58.07	7.38367	-56.6361	-59.1947
2012-12-16 03:28:40	55.65	58.18	7.39061	-56.7278	-59.3068
2012-12-16 03:38:40	55.74	58.27	7.39755	-56.8196	-59.3986
2012-12-16 03:48:40	55.84	58.36	7.4045	-56.9215	-59.4903	2012-12-16 03:48:40
2012-12-16 03:58:40	55.97	58.49	7.41144	-57.054	-59.6228
2012-12-16 04:08:40	56.08	58.6	7.41839	-57.1662	-59.735
2012-12-16 04:18:40	56.19	58.71	7.42533	-57.2783	-59.8471
2012-12-16 04:28:40	56.32	58.84	7.43228	-57.4108	-59.9796
2012-12-16 04:38:40	56.4	58.91	7.43922	-57.4924	-60.051
2012-12-16 04:48:40	56.51	59.02	7.44617	-57.6045	-60.1631	2012-12-16 04:48:40
2012-12-16 04:58:40	56.62	59.14	7.45311	-57.7166	-60.2854
2012-12-16 05:08:40	56.72	59.24	7.46005	-57.8186	-60.3874
2012-12-16 05:18:40	56.83	59.36	7.467	-57.9307	-60.5097
2012-12-16 05:28:40	56.94	59.45	7.47394	-58.0428	-60.6014
2012-12-16 05:38:40	57.06	59.58	7.48089	-58.1651	-60.7339
2012-12-16 05:48:40	57.16	59.69	7.48783	-58.2671	-60.8461	2012-12-16 05:48:40
2012-12-16 05:58:40	57.27	59.79	7.49478	-58.3792	-60.948
2012-12-16 06:08:40	57.41	59.89	7.50172	-58.5219	-61.0499
2012-12-16 06:18:40	57.48	59.99	7.50867	-58.5933	-61.1519
2012-12-16 06:28:40	57.59	60.11	7.51561	-58.7054	-61.2742
2012-12-16 06:38:40	57.7	60.22	7.52255	-58.8175	-61.3863
2012-12-16 06:48:40	57.81	60.32	7.5295	-58.9297	-61.4883	2012-12-16 06:48:40
2012-12-16 06:58:40	57.94	60.42	7.53644	-59.0622	-61.5902
2012-12-16 07:08:40	58.04	60.57	7.54339	-59.1641	-61.7431
2012-12-16 07:18:40	58.14	60.64	7.55033	-59.2661	-61.8145
2012-12-16 07:28:40	58.25	60.78	7.55728	-59.3782	-61.9572
2012-12-16 07:38:40	58.37	60.89	7.56422	-59.5005	-62.0693
2012-12-16 07:48:40	58.48	60.98	7.57117	-59.6126	-62.1611	2012-12-16 07:48:40
2012-12-16 07:58:40	58.59	61.11	7.57811	-59.7248	-62.2936
2012-12-16 08:08:40	58.68	61.21	7.58505	-59.8165	-62.3955
2012-12-16 08:18:40	58.81	61.35	7.592	-59.949	-62.5382
2012-12-16 08:28:40	58.92	61.45	7.59894	-60.0612	-62.6402
2012-12-16 08:38:40	59.02	61.55	7.60589	-60.1631	-62.7421
2012-12-16 08:48:40	59.15	61.66	7.61283	-60.2956	-62.8542	2012-12-16 08:48:40
2012-12-16 08:58:40	59.23	61.76	7.61978	-60.3772	-62.9562
2012-12-16 09:08:40	59.36	61.88	7.62672	-60.5097	-63.0785
2012-12-16 09:18:40	59.45	61.98	7.63367	-60.6014	-63.1804
2012-12-16 09:28:40	59.54	62.08	7.64061	-60.6932	-63.2824
2012-12-16 09:38:40	59.69	62.22	7.64755	-60.8461	-63.4251
2012-12-16 09:48:40	59.79	62.32	7.6545	-60.948	-63.527	2012-12-16 09:48:40
2012-12-16 09:58:40	59.92	62.44	7.66144	-61.0805	-63.6493
2012-12-16 10:08:40	60.01	62.53	7.66839	-61.1723	-63.7411
2012-12-16 10:18:40	60.13	62.66	7.67533	-61.2946	-63.8736
2012-12-16 10:28:40	60.26	62.8	7.68228	-61.4271	-64.0163
2012-12-16 10:38:40	60.38	62.88	7.68922	-61.5494	-64.0979
2012-12-16 10:48:40	60.5	62.99	7.69617	-61.6718	-64.21	2012-12-16 10:48:40
2012-12-16 10:58:40	60.61	63.13	7.70311	-61.7839	-64.3527
2012-12-16 11:08:40	60.71	63.25	7.71005	-61.8858	-64.475
2012-12-16 11:18:40	60.84	63.37	7.717	-62.0183	-64.5973
2012-12-16 11:28:40	60.95	63.49	7.72394	-62.1305	-64.7197
2012-12-16 11:38:40	61.07	63.59	7.73089	-62.2528	-64.8216
2012-12-16 11:48:40	61.2	63.72	7.73783	-62.3853	-64.9541	2012-12-16 11:48:40
2012-12-16 11:58:40	61.32	63.85	7.74478	-62.5076	-65.0866
2012-12-16 12:08:40	61.44	63.97	7.75172	-62.63	-65.209
2012-12-16 12:18:40	61.57	64.1	7.75867	-62.7625	-65.3415
2012-12-16 12:28:40	61.68	64.22	7.76561	-62.8746	-65.4638
2012-12-16 12:38:40	61.81	64.33	7.77255	-63.0071	-65.5759
2012-12-16 12:48:40	61.93	64.46	7.7795	-63.1295	-65.7085	2012-12-16 12:48:40
2012-12-16 12:58:40	62.04	64.57	7.78644	-63.2416	-65.8206
2012-12-16 13:08:40	62.17	64.71	7.79339	-63.3741	-65.9633
2012-12-16 13:18:40	62.31	64.85	7.80033	-63.5168	-66.106
2012-12-16 13:28:40	62.42	64.96	7.80728	-63.629	-66.2181
2012-12-16 13:38:40	62.55	65.05	7.81422	-63.7615	-66.3099
2012-12-16 13:48:40	62.66	65.2	7.82117	-63.8736	-66.4628	2012-12-16 13:48:40
2012-12-16 13:58:40	62.79	65.33	7.82811	-64.0061	-66.5953
2012-12-16 14:08:40	62.91	65.45	7.83505	-64.1284	-66.7176
2012-12-16 14:18:40	63.05	65.56	7.842	-64.2712	-66.8298
2012-12-16 14:28:40	63.18	65.72	7.84894	-64.4037	-66.9929
2012-12-16 14:38:40	63.32	65.86	7.85589	-64.5464	-67.1356
2012-12-16 14:48:40	63.03	65.61	7.86283	-64.2508	-66.8807	2012-12-16 14:48:40
2012-12-16 14:58:40	63.28	65.86	7.86978	-64.5056	-67.1356
2012-12-16 15:08:40	63.46	66.03	7.87672	-64.6891	-67.3089
2012-12-16 15:18:40	63.6	66.17	7.88367	-64.8318	-67.4516
2012-12-16 15:28:40	63.75	66.29	7.89061	-64.9847	-67.5739
2012-12-16 15:38:40	63.88	66.45	7.89755	-65.1172	-67.737
2012-12-16 15:48:40	64.02	66.59	7.9045	-65.2599	-67.8797	2012-12-16 15:48:40
2012-12-16 15:58:40	64.16	66.74	7.91144	-65.4027	-68.0326
2012-12-16 16:08:40	64.3	66.85	7.91839	-65.5454	-68.1448
2012-12-16 16:18:40	64.41	66.99	7.92533	-65.6575	-68.2875
2012-12-16 16:28:40	64.56	67.14	7.93228	-65.8104	-68.4404
2012-12-16 16:38:40	64.69	67.27	7.93922	-65.9429	-68.5729
2012-12-16 16:48:40	64.81	67.39	7.94617	-66.0652	-68.6952	2012-12-16 16:48:40
2012-12-16 16:58:40	64.97	67.55	7.95311	-66.2283	-68.8583
2012-12-16 17:08:40	65.14	67.71	7.96005	-66.4016	-69.0214
2012-12-16 17:18:40	65.28	67.84	7.967	-66.5443	-69.1539
2012-12-16 17:28:40	65.43	68	7.97394	-66.6972	-69.317
2012-12-16 17:38:40	65.58	68.15	7.98089	-66.8502	-69.4699
2012-12-16 17:48:40	65.72	68.29	7.98783	-66.9929	-69.6126	2012-12-16 17:48:40
2012-12-16 17:58:40	65.88	68.45	7.99478	-67.156	-69.7757
2012-12-16 18:08:40	66.03	68.6	8.00172	-67.3089	-69.9286
2012-12-16 18:18:40	66.15	68.72	8.00867	-67.4312	-70.051
2012-12-16 18:28:40	66.31	68.88	8.01561	-67.5943	-70.2141
2012-12-16 18:38:40	66.46	69.03	8.02255	-67.7472	-70.367
2012-12-16 18:48:40	66.62	69.19	8.0295	-67.9103	-70.5301	2012-12-16 18:48:40
2012-12-16 18:58:40	66.78	69.35	8.03644	-68.0734	-70.6932
2012-12-16 19:08:40	66.93	69.5	8.04339	-68.2263	-70.8461
2012-12-16 19:18:40	67.09	69.65	8.05033	-68.3894	-70.999
2012-12-16 19:28:40	67.24	69.81	8.05728	-68.5423	-71.1621
2012-12-16 19:38:40	67.38	69.96	8.06422	-68.685	-71.315
2012-12-16 19:48:40	67.55	70.13	8.07117	-68.8583	-71.4883	2012-12-16 19:48:40
2012-12-16 19:58:40	67.7	70.27	8.07811	-69.0112	-71.631
2012-12-16 20:08:40	67.86	70.43	8.08505	-69.1743	-71.7941
2012-12-16 20:18:40	68.01	70.59	8.092	-69.3272	-71.9572
2012-12-16 20:28:40	68.18	70.76	8.09894	-69.5005	-72.1305
2012-12-16 20:38:40	68.33	70.92	8.10589	-69.6534	-72.2936
2012-12-16 20:48:40	68.49	71.06	8.11283	-69.8165	-72.4363	2012-12-16 20:48:40
2012-12-16 20:58:40	68.64	71.21	8.11978	-69.9694	-72.5892
2012-12-16 21:08:40	68.81	71.39	8.12672	-70.1427	-72.7727
2012-12-16 21:18:40	68.99	71.56	8.13367	-70.3262	-72.946
2012-12-16 21:28:40	69.14	71.73	8.14061	-70.4791	-73.1193
2012-12-16 21:38:40	69.28	71.85	8.14755	-70.6218	-73.2416
2012-12-16 21:48:40	69.44	72.03	8.1545	-70.7849	-73.4251	2012-12-16 21:48:40
2012-12-16 21:58:40	69.62	72.21	8.16144	-70.9684	-73.6086
2012-12-16 22:08:40	69.77	72.35	8.16839	-71.1213	-73.7513
2012-12-16 22:18:40	69.93	72.5	8.17533	-71.2844	-73.9042
2012-12-16 22:28:40	70.07	72.67	8.18228	-71.4271	-74.0775
2012-12-16 22:38:40	70.26	72.85	8.18922	-71.6208	-74.261
2012-12-16 22:48:40	70.41	73.01	8.19617	-71.7737	-74.4241	2012-12-16 22:48:40
2012-12-16 22:58:40	70.59	73.18	8.20311	-71.9572	-74.5973
2012-12-16 23:08:40	70.75	73.34	8.21005	-72.1203	-74.7604
2012-12-16 23:18:40	70.92	73.5	8.217	-72.2936	-74.9235
2012-12-16 23:28:40	71.08	73.66	8.22394	-72.4567	-75.0866
2012-12-16 23:38:40	71.25	73.84	8.23089	-72.63	-75.2701
2012-12-16 23:48:40	71.42	74	8.23783	-72.8033	-75.4332	2012-12-16 23:48:40
2012-12-16 23:58:40	71.56	74.16	8.24478	-72.946	-75.5963
2012-12-17 00:08:40	71.73	74.31	8.25172	-73.1193	-75.7492
2012-12-17 00:18:40	71.9	74.5	8.25867	-73.2926	-75.9429
2012-12-17 00:28:40	72.08	74.66	8.26561	-73.476	-76.106
2012-12-17 00:38:40	72.24	74.83	8.27255	-73.6391	-76.2793
2012-12-17 00:48:40	72.41	75	8.2795	-73.8124	-76.4526	2012-12-17 00:48:40
2012-12-17 00:58:40	72.56	75.15	8.28644	-73.9653	-76.6055
2012-12-17 01:08:40	72.73	75.28	8.29339	-74.1386	-76.738
2012-12-17 01:18:40	72.88	75.47	8.30033	-74.2915	-76.9317
2012-12-17 01:28:40	73.04	75.6	8.30728	-74.4546	-77.0642
2012-12-17 01:38:40	73.22	75.81	8.31422	-74.6381	-77.2783
2012-12-17 01:48:40	73.38	75.97	8.32117	-74.8012	-77.4414	2012-12-17 01:48:40
2012-12-17 01:58:40	73.53	76.12	8.32811	-74.9541	-77.5943
2012-12-17 02:08:40	73.68	76.27	8.33505	-75.107	-77.7472
2012-12-17 02:18:40	73.87	76.47	8.342	-75.3007	-77.9511
2012-12-17 02:28:40	74.05	76.62	8.34894	-75.4842	-78.104
2012-12-17 02:38:40	74.22	76.81	8.35589	-75.6575	-78.2977
2012-12-17 02:48:40	74.37	76.96	8.36283	-75.8104	-78.4506	2012-12-17 02:48:40
2012-12-17 02:58:40	74.53	77.13	8.36978	-75.9735	-78.6239
2012-12-17 03:08:40	74.71	77.3	8.37672	-76.157	-78.7971
2012-12-17 03:18:40	74.86	77.45	8.38367	-76.3099	-78.9501
2012-12-17 03:28:40	75.04	77.62	8.39061	-76.4934	-79.1233
2012-12-17 03:38:40	75.17	77.77	8.39755	-76.6259	-79.2762
2012-12-17 03:48:40	75.37	77.97	8.4045	-76.8298	-79.4801	2012-12-17 03:48:40
2012-12-17 03:58:40	75.55	78.16	8.41144	-77.0133	-79.6738
2012-12-17 04:08:40	75.71	78.31	8.41839	-77.1764	-79.8267
2012-12-17 04:18:40	75.84	78.45	8.42533	-77.3089	-79.9694
2012-12-17 04:28:40	76.01	78.6	8.43228	-77.4822	-80.1223
2012-12-17 04:38:40	76.2	78.8	8.43922	-77.6758	-80.3262
2012-12-17 04:48:40	76.35	78.95	8.44617	-77.8287	-80.4791	2012-12-17 04:48:40
2012-12-17 04:58:40	76.5	79.1	8.45311	-77.9817	-80.632
2012-12-17 05:08:40	76.69	79.3	8.46005	-78.1753	-80.8359
2012-12-17 05:18:40	76.84	79.45	8.467	-78.3282	-80.9888
2012-12-17 05:28:40	77.02	79.63	8.47394	-78.5117	-81.1723
2012-12-17 05:38:40	77.17	79.78	8.48089	-78.6646	-81.3252
2012-12-17 05:48:40	77.34	79.94	8.48783	-78.8379	-81.4883	2012-12-17 05:48:40
2012-12-17 05:58:40	77.52	80.12	8.49478	-79.0214	-81.6718
2012-12-17 06:08:40	77.67	80.28	8.50172	-79.1743	-81.8349
2012-12-17 06:18:40	77.86	80.46	8.50867	-79.368	-82.0183
2012-12-17 06:28:40	78.04	80.65	8.51561	-79.5515	-82.212
2012-12-17 06:38:40	78.18	80.8	8.52255	-79.6942	-82.3649
2012-12-17 06:48:40	78.38	81	8.5295	-79.8981	-82.5688	2012-12-17 06:48:40
2012-12-17 06:58:40	78.56	81.16	8.53644	-80.0815	-82.7319
2012-12-17 07:08:40	78.72	81.34	8.54339	-80.2446	-82.9154
2012-12-17 07:18:40	78.89	81.49	8.55033	-80.4179	-83.0683
2012-12-17 07:28:40	79.06	81.68	8.55728	-80.5912	-83.262
2012-12-17 07:38:40	79.25	81.88	8.56422	-80.7849	-83.4659
2012-12-17 07:48:40	79.41	82.02	8.57117	-80.948	-83.6086	2012-12-17 07:48:40
2012-12-17 07:58:40	79.59	82.21	8.57811	-81.1315	-83.8022
2012-12-17 08:08:40	79.75	82.38	8.58505	-81.2946	-83.9755
2012-12-17 08:18:40	79.95	82.54	8.592	-81.4985	-84.1386
2012-12-17 08:28:40	80.15	82.77	8.59894	-81.7023	-84.3731
2012-12-17 08:38:40	80.3	82.93	8.60589	-81.8552	-84.5362
2012-12-17 08:48:40	80.49	83.11	8.61283	-82.0489	-84.7197	2012-12-17 08:48:40
2012-12-17 08:58:40	80.67	83.29	8.61978	-82.2324	-84.9032
2012-12-17 09:08:40	80.54	83.13	8.62672	-82.0999	-84.7401
2012-12-17 09:18:40	80.82	83.38	8.63367	-82.3853	-84.9949
2012-12-17 09:28:40	80.99	83.59	8.64061	-82.5586	-85.209
2012-12-17 09:38:40	81.15	83.75	8.64755	-82.7217	-85.3721
2012-12-17 09:48:40	81.32	83.93	8.6545	-82.895	-85.5556	2012-12-17 09:48:40
2012-12-17 09:58:40	81.45	84.08	8.66144	-83.0275	-85.7085
2012-12-17 10:08:40	81.63	84.24	8.66839	-83.211	-85.8716
2012-12-17 10:18:40	81.8	84.41	8.67533	-83.3843	-86.0449
2012-12-17 10:28:40	82	84.62	8.68228	-83.5882	-86.2589
2012-12-17 10:38:40	81.86	84.49	8.68922	-83.4455	-86.1264
2012-12-17 10:48:40	82.26	84.94	8.69617	-83.8532	-86.5851	2012-12-17 10:48:40
2012-12-17 10:58:40	82.49	85.18	8.70311	-84.0877	-86.8298
2012-12-17 11:08:40	82.79	85.43	8.71005	-84.3935	-87.0846
2012-12-17 11:18:40	83.05	85.73	8.717	-84.6585	-87.3904
2012-12-17 11:28:40	83.27	85.89	8.72394	-84.8828	-87.5535
2012-12-17 11:38:40	83.44	86.11	8.73089	-85.0561	-87.7778
2012-12-17 11:48:40	83.68	86.33	8.73783	-85.3007	-88.002	2012-12-17 11:48:40
2012-12-17 11:58:40	83.87	86.51	8.74478	-85.4944	-88.1855
2012-12-17 12:08:40	84.11	86.75	8.75172	-85.739	-88.4302
2012-12-17 12:18:40	84.29	86.97	8.75867	-85.9225	-88.6544
2012-12-17 12:28:40	84.52	87.14	8.76561	-86.157	-88.8277
2012-12-17 12:38:40	84.76	87.38	8.77255	-86.4016	-89.0724
2012-12-17 12:48:40	84.94	87.59	8.7795	-86.5851	-89.2864	2012-12-17 12:48:40
2012-12-17 12:58:40	85.17	87.8	8.78644	-86.8196	-89.5005
2012-12-17 13:08:40	85.38	88.01	8.79339	-87.0336	-89.7146
2012-12-17 13:18:40	85.6	88.23	8.80033	-87.2579	-89.9388
2012-12-17 13:28:40	85.8	88.44	8.80728	-87.4618	-90.1529
2012-12-17 13:38:40	85.99	88.63	8.81422	-87.6555	-90.3466
2012-12-17 13:48:40	86.21	88.8	8.82117	-87.8797	-90.5199	2012-12-17 13:48:40
2012-12-17 13:58:40	86.41	89.09	8.82811	-88.0836	-90.8155
2012-12-17 14:08:40	86.65	89.32	8.83505	-88.3282	-91.0499
2012-12-17 14:18:40	86.87	89.49	8.842	-88.5525	-91.2232
2012-12-17 14:28:40	87.03	89.73	8.84894	-88.7156	-91.4679
2012-12-17 14:38:40	87.27	89.94	8.85589	-88.9602	-91.682
2012-12-17 14:48:40	87.44	90.08	8.86283	-89.1335	-91.8247	2012-12-17 14:48:40
2012-12-17 14:58:40	87.66	90.31	8.86978	-89.3578	-92.0591
2012-12-17 15:08:40	87.87	90.55	8.87672	-89.5719	-92.3038
2012-12-17 15:18:40	88.1	90.77	8.88367	-89.8063	-92.528
2012-12-17 15:28:40	88.33	90.97	8.89061	-90.0408	-92.7319
2012-12-17 15:38:40	88.54	91.18	8.89755	-90.2548	-92.946
2012-12-17 15:48:40	88.74	91.38	8.9045	-90.4587	-93.1498	2012-12-17 15:48:40
2012-12-17 15:58:40	88.94	91.59	8.91144	-90.6626	-93.3639
2012-12-17 16:08:40	89.16	91.82	8.91839	-90.8869	-93.5984
2012-12-17 16:18:40	89.4	92.06	8.92533	-91.1315	-93.843
2012-12-17 16:28:40	89.62	92.25	8.93228	-91.3558	-94.0367
2012-12-17 16:38:40	89.8	92.45	8.93922	-91.5392	-94.2406
2012-12-17 16:48:40	90	92.64	8.94617	-91.7431	-94.4343	2012-12-17 16:48:40
2012-12-17 16:58:40	90.23	92.89	8.95311	-91.9776	-94.6891
2012-12-17 17:08:40	90.41	93.08	8.96005	-92.1611	-94.8828
2012-12-17 17:18:40	90.66	93.32	8.967	-92.4159	-95.1274
2012-12-17 17:28:40	90.87	93.51	8.97394	-92.63	-95.3211
2012-12-17 17:38:40	91.06	93.73	8.98089	-92.8236	-95.5454
2012-12-17 17:48:40	91.29	93.94	8.98783	-93.0581	-95.7594	2012-12-17 17:48:40
2012-12-17 17:58:40	91.51	94.17	8.99478	-93.2824	-95.9939
2012-12-17 18:08:40	91.74	94.38	9.00172	-93.5168	-96.208
2012-12-17 18:18:40	91.93	94.64	9.00867	-93.7105	-96.473
2012-12-17 18:28:40	92.19	94.84	9.01561	-93.9755	-96.6769
2012-12-17 18:38:40	92.36	95.04	9.02255	-94.1488	-96.8807
2012-12-17 18:48:40	92.6	95.27	9.0295	-94.3935	-97.1152	2012-12-17 18:48:40
2012-12-17 18:58:40	92.83	95.5	9.03644	-94.6279	-97.3496
2012-12-17 19:08:40	93.07	95.75	9.04339	-94.8726	-97.6045
2012-12-17 19:18:40	93.31	96	9.05033	-95.1172	-97.8593
2012-12-17 19:28:40	93.55	96.23	9.05728	-95.3619	-98.0938
2012-12-17 19:38:40	93.8	96.48	9.06422	-95.6167	-98.3486
2012-12-17 19:48:40	94.04	96.73	9.07117	-95.8614	-98.6035	2012-12-17 19:48:40
2012-12-17 19:58:40	94.25	96.94	9.07811	-96.0754	-98.8175
2012-12-17 20:08:40	94.5	97.16	9.08505	-96.3303	-99.0418
2012-12-17 20:18:40	94.72	97.4	9.092	-96.5545	-99.2864
2012-12-17 20:28:40	94.95	97.63	9.09894	-96.789	-99.5209
2012-12-17 20:38:40	95.19	97.9	9.10589	-97.0336	-99.7961
2012-12-17 20:48:40	95.44	98.14	9.11283	-97.2885	-100.041	2012-12-17 20:48:40
2012-12-17 20:58:40	95.68	98.36	9.11978	-97.5331	-100.265
2012-12-17 21:08:40	95.95	98.64	9.12672	-97.8084	-100.55
2012-12-17 21:18:40	96.18	98.88	9.13367	-98.0428	-100.795
2012-12-17 21:28:40	96.44	99.14	9.14061	-98.3078	-101.06
2012-12-17 21:38:40	96.7	99.41	9.14755	-98.5729	-101.335
2012-12-17 21:48:40	96.95	99.65	9.1545	-98.8277	-101.58	2012-12-17 21:48:40
2012-12-17 21:58:40	97.17	99.88	9.16144	-99.052	-101.814
2012-12-17 22:08:40	97.41	100.13	9.16839	-99.2966	-102.069
2012-12-17 22:18:40	97.66	100.38	9.17533	-99.5515	-102.324
2012-12-17 22:28:40	97.88	100.59	9.18228	-99.7757	-102.538
2012-12-17 22:38:40	98.11	100.86	9.18922	-100.01	-102.813
2012-12-17 22:48:40	98.42	101.14	9.19617	-100.326	-103.099	2012-12-17 22:48:40
2012-12-17 22:58:40	98.69	101.38	9.20311	-100.601	-103.344
2012-12-17 23:08:40	98.9	101.62	9.21005	-100.815	-103.588
2012-12-17 23:18:40	99.18	101.87	9.217	-101.101	-103.843
2012-12-17 23:28:40	99.44	102.15	9.22394	-101.366	-104.128
2012-12-17 23:38:40	99.7	102.4	9.23089	-101.631	-104.383
2012-12-17 23:48:40	99.95	102.66	9.23783	-101.886	-104.648	2012-12-17 23:48:40
2012-12-17 23:58:40	100.19	102.89	9.24478	-102.13	-104.883
2012-12-18 00:08:40	100.46	103.18	9.25172	-102.406	-105.178
2012-12-18 00:18:40	100.71	103.45	9.25867	-102.661	-105.454
2012-12-18 00:28:40	100.98	103.71	9.26561	-102.936	-105.719
2012-12-18 00:38:40	101.26	103.98	9.27255	-103.221	-105.994
2012-12-18 00:48:40	101.52	104.26	9.2795	-103.486	-106.279	2012-12-18 00:48:40
2012-12-18 00:58:40	101.8	104.5	9.28644	-103.772	-106.524
2012-12-18 01:08:40	102.09	104.78	9.29339	-104.067	-106.809
2012-12-18 01:18:40	102.32	105.05	9.30033	-104.302	-107.085
2012-12-18 01:28:40	102.58	105.31	9.30728	-104.567	-107.35
2012-12-18 01:38:40	102.81	105.6	9.31422	-104.801	-107.645
2012-12-18 01:48:40	103.13	105.87	9.32117	-105.127	-107.92	2012-12-18 01:48:40
2012-12-18 01:58:40	103.38	106.11	9.32811	-105.382	-108.165
2012-12-18 02:08:40	103.62	106.39	9.33505	-105.627	-108.451
2012-12-18 02:18:40	103.93	106.67	9.342	-105.943	-108.736
2012-12-18 02:28:40	104.2	106.94	9.34894	-106.218	-109.011
2012-12-18 02:38:40	104.47	107.23	9.35589	-106.493	-109.307
2012-12-18 02:48:40	104.74	107.49	9.36283	-106.769	-109.572	2012-12-18 02:48:40
2012-12-18 02:58:40	105.02	107.75	9.36978	-107.054	-109.837
2012-12-18 03:08:40	105.28	108.04	9.37672	-107.319	-110.133
2012-12-18 03:18:40	105.55	108.31	9.38367	-107.594	-110.408
2012-12-18 03:28:40	105.83	108.54	9.39061	-107.88	-110.642
2012-12-18 03:38:40	106.08	108.83	9.39755	-108.135	-110.938
2012-12-18 03:48:40	106.36	109.11	9.4045	-108.42	-111.223	2012-12-18 03:48:40
2012-12-18 03:58:40	106.63	109.38	9.41144	-108.695	-111.498
2012-12-18 04:08:40	106.89	109.66	9.41839	-108.96	-111.784
2012-12-18 04:18:40	107.17	109.93	9.42533	-109.246	-112.059
2012-12-18 04:28:40	107.44	110.16	9.43228	-109.521	-112.294
2012-12-18 04:38:40	107.71	110.47	9.43922	-109.796	-112.61
2012-12-18 04:48:40	107.98	110.75	9.44617	-110.071	-112.895	2012-12-18 04:48:40
2012-12-18 04:58:40	108.24	110.99	9.45311	-110.336	-113.14
2012-12-18 05:08:40	108.54	111.28	9.46005	-110.642	-113.435
2012-12-18 05:18:40	108.75	111.59	9.467	-110.856	-113.751
2012-12-18 05:28:40	109.09	111.85	9.47394	-111.203	-114.016
2012-12-18 05:38:40	109.38	112.17	9.48089	-111.498	-114.343
2012-12-18 05:48:40	109.68	112.42	9.48783	-111.804	-114.597	2012-12-18 05:48:40
2012-12-18 05:58:40	109.94	112.72	9.49478	-112.069	-114.903
2012-12-18 06:08:40	110.23	113.04	9.50172	-112.365	-115.229
2012-12-18 06:18:40	110.51	113.3	9.50867	-112.65	-115.494
2012-12-18 06:28:40	110.77	113.45	9.51561	-112.915	-115.647
2012-12-18 06:38:40	111.06	113.84	9.52255	-113.211	-116.045
2012-12-18 06:48:40	111.39	114.15	9.5295	-113.547	-116.361	2012-12-18 06:48:40
2012-12-18 06:58:40	111.6	114.42	9.53644	-113.761	-116.636
2012-12-18 07:08:40	111.9	114.7	9.54339	-114.067	-116.922
2012-12-18 07:18:40	112.16	114.96	9.55033	-114.332	-117.187
2012-12-18 07:28:40	112.42	115.22	9.55728	-114.597	-117.452
2012-12-18 07:38:40	112.65	115.45	9.56422	-114.832	-117.686
2012-12-18 07:48:40	112.92	115.71	9.57117	-115.107	-117.951	2012-12-18 07:48:40
2012-12-18 07:58:40	113.18	115.93	9.57811	-115.372	-118.175
2012-12-18 08:08:40	113.41	116.22	9.58505	-115.607	-118.471
2012-12-18 08:18:40	113.69	116.49	9.592	-115.892	-118.746
2012-12-18 08:38:40	113.91	116.68	9.60589	-116.116	-118.94
2012-12-18 08:48:40	114.23	116.98	9.61283	-116.442	-119.246
2012-12-18 08:58:40	114.51	117.29	9.61978	-116.728	-119.562	2012-12-18 08:58:40
2012-12-18 09:08:40	114.77	117.56	9.62672	-116.993	-119.837
2012-12-18 09:18:40	115.04	117.84	9.63367	-117.268	-120.122
2012-12-18 09:28:40	115.3	118.09	9.64061	-117.533	-120.377
2012-12-18 09:38:40	115.57	118.37	9.64755	-117.808	-120.663
2012-12-18 09:48:40	115.85	118.65	9.6545	-118.094	-120.948
2012-12-18 09:58:40	116.12	118.89	9.66144	-118.369	-121.193	2012-12-18 09:58:40
2012-12-18 10:08:40	116.36	119.16	9.66839	-118.614	-121.468
2012-12-18 10:18:40	116.61	119.42	9.67533	-118.869	-121.733
2012-12-18 10:28:40	116.88	119.69	9.68228	-119.144	-122.008
2012-12-18 10:38:40	117.13	119.94	9.68922	-119.399	-122.263
2012-12-18 10:48:40	117.37	120.19	9.69617	-119.643	-122.518
2012-12-18 10:58:40	117.65	120.48	9.70311	-119.929	-122.813	2012-12-18 10:58:40
2012-12-18 11:08:40	117.95	120.79	9.71005	-120.234	-123.129
2012-12-18 11:18:40	118.24	121.07	9.717	-120.53	-123.415
2012-12-18 11:28:40	118.51	121.35	9.72394	-120.805	-123.7
2012-12-18 11:38:40	118.76	121.58	9.73089	-121.06	-123.935
2012-12-18 11:48:40	119.04	121.89	9.73783	-121.346	-124.251
2012-12-18 11:58:40	119.32	122.16	9.74478	-121.631	-124.526	2012-12-18 11:58:40
2012-12-18 12:08:40	119.63	122.48	9.75172	-121.947	-124.852
2012-12-18 12:18:40	119.91	122.76	9.75867	-122.232	-125.138
2012-12-18 12:28:40	120.2	123.04	9.76561	-122.528	-125.423
2012-12-18 12:38:40	120.48	123.33	9.77255	-122.813	-125.719
2012-12-18 12:48:40	120.76	123.63	9.7795	-123.099	-126.024
2012-12-18 12:58:40	121.08	123.9	9.78644	-123.425	-126.3	2012-12-18 12:58:40
2012-12-18 13:08:40	121.35	124.23	9.79339	-123.7	-126.636
2012-12-18 13:18:40	121.61	124.49	9.80033	-123.965	-126.901
2012-12-18 13:28:40	121.91	124.77	9.80728	-124.271	-127.187
2012-12-18 13:38:40	122.19	125.08	9.81422	-124.557	-127.503
2012-12-18 13:48:40	122.47	125.34	9.82117	-124.842	-127.768
2012-12-18 13:58:40	122.71	125.56	9.82811	-125.087	-127.992	2012-12-18 13:58:40
2012-12-18 14:08:40	122.99	125.87	9.83505	-125.372	-128.308
2012-12-18 14:18:40	123.25	126.05	9.842	-125.637	-128.491
2012-12-18 14:28:40	123.51	126.4	9.84894	-125.902	-128.848
2012-12-18 14:38:40	123.79	126.7	9.85589	-126.188	-129.154
2012-12-18 14:48:40	124.1	126.99	9.86283	-126.504	-129.45
2012-12-18 14:58:40	124.38	127.27	9.86978	-126.789	-129.735	2012-12-18 14:58:40
2012-12-18 15:08:40	124.67	127.6	9.87672	-127.085	-130.071
2012-12-18 15:18:40	124.93	127.85	9.88367	-127.35	-130.326
2012-12-18 15:28:40	125.22	128.13	9.89061	-127.645	-130.612
2012-12-18 15:38:40	125.5	128.42	9.89755	-127.931	-130.907
2012-12-18 15:48:40	125.81	128.72	9.9045	-128.247	-131.213
2012-12-18 15:58:40	126.08	128.97	9.91144	-128.522	-131.468	2012-12-18 15:58:40
2012-12-18 16:08:40	126.33	129.28	9.91839	-128.777	-131.784
2012-12-18 16:18:40	126.62	129.53	9.92533	-129.072	-132.039
2012-12-18 16:28:40	126.91	129.81	9.93228	-129.368	-132.324
2012-12-18 16:38:40	126.87	129.72	9.93922	-129.327	-132.232
2012-12-18 16:48:40	127.2	130.12	9.94617	-129.664	-132.64
2012-12-18 16:58:40	127.5	130.42	9.95311	-129.969	-132.946	2012-12-18 16:58:40
2012-12-18 17:08:40	127.78	130.7	9.96005	-130.255	-133.231
2012-12-18 17:18:40	128.01	130.96	9.967	-130.489	-133.496
2012-12-18 17:28:40	128.36	131.28	9.97394	-130.846	-133.823
2012-12-18 17:38:40	128.63	131.55	9.98089	-131.121	-134.098
2012-12-18 17:48:40	128.92	131.86	9.98783	-131.417	-134.414
2012-12-18 17:58:40	129.21	132.15	9.99478	-131.713	-134.709	2012-12-18 17:58:40
2012-12-18 18:08:40	129.47	132.39	10.0017	-131.978	-134.954
2012-12-18 18:18:40	129.74	132.68	10.0087	-132.253	-135.25
2012-12-18 18:28:40	130.02	132.97	10.0156	-132.538	-135.545
2012-12-18 18:38:40	130.31	133.27	10.0226	-132.834	-135.851
2012-12-18 18:48:40	130.59	133.56	10.0295	-133.119	-136.147
2012-12-18 18:58:40	130.87	133.81	10.0364	-133.405	-136.402	2012-12-18 18:58:40
2012-12-18 19:08:40	131.16	134.13	10.0434	-133.7	-136.728
2012-12-18 19:18:40	131.45	134.38	10.0503	-133.996	-136.983
2012-12-18 19:28:40	131.7	134.7	10.0573	-134.251	-137.309
2012-12-18 19:38:40	132	134.99	10.0642	-134.557	-137.604
2012-12-18 19:48:40	132.28	135.26	10.0712	-134.842	-137.88
2012-12-18 19:58:40	132.56	135.55	10.0781	-135.127	-138.175	2012-12-18 19:58:40
2012-12-18 20:08:40	132.84	135.84	10.0851	-135.413	-138.471
2012-12-18 20:18:40	133.12	136.12	10.092	-135.698	-138.756
2012-12-18 20:28:40	133.41	136.39	10.0989	-135.994	-139.032
2012-12-18 20:38:40	133.69	136.71	10.1059	-136.279	-139.358
2012-12-18 20:48:40	133.97	137	10.1128	-136.565	-139.653
2012-12-18 20:58:40	134.24	137.27	10.1198	-136.84	-139.929	2012-12-18 20:58:40
2012-12-18 21:08:40	134.54	137.56	10.1267	-137.146	-140.224
2012-12-18 21:18:40	134.81	137.86	10.1337	-137.421	-140.53
2012-12-18 21:28:40	135.09	138.13	10.1406	-137.706	-140.805
2012-12-18 21:38:40	135.37	138.4	10.1476	-137.992	-141.081
2012-12-18 21:48:40	135.63	138.7	10.1545	-138.257	-141.386
2012-12-18 21:58:40	135.9	138.95	10.1614	-138.532	-141.641	2012-12-18 21:58:40
2012-12-18 22:08:40	136.18	139.23	10.1684	-138.818	-141.927
2012-12-18 22:18:40	136.44	139.51	10.1753	-139.083	-142.212
2012-12-18 22:28:40	136.71	139.77	10.1823	-139.358	-142.477
2012-12-18 22:38:40	136.97	140.04	10.1892	-139.623	-142.752
2012-12-18 22:48:40	137.24	140.28	10.1962	-139.898	-142.997
2012-12-18 22:58:40	137.5	140.53	10.2031	-140.163	-143.252	2012-12-18 22:58:40
2012-12-18 23:08:40	137.76	140.81	10.2101	-140.428	-143.537
2012-12-18 23:18:40	138.01	141.09	10.217	-140.683	-143.823
2012-12-18 23:28:40	138.26	141.35	10.2239	-140.938	-144.088
2012-12-18 23:38:40	138.53	141.62	10.2309	-141.213	-144.363
2012-12-18 23:48:40	138.78	141.88	10.2378	-141.468	-144.628
2012-12-18 23:58:40	139.04	142.15	10.2448	-141.733	-144.903	2012-12-18 23:58:40
2012-12-19 00:08:40	139.31	142.42	10.2517	-142.008	-145.178
2012-12-19 00:18:40	139.55	142.68	10.2587	-142.253	-145.443
2012-12-19 00:28:40	139.81	142.94	10.2656	-142.518	-145.708
2012-12-19 00:38:40	140.08	143.17	10.2726	-142.793	-145.943
2012-12-19 00:48:40	140.17	143.46	10.2795	-142.885	-146.239
2012-12-19 00:58:40	140.6	143.76	10.2864	-143.323	-146.544	2012-12-19 00:58:40
2012-12-19 01:08:40	140.85	144.01	10.2934	-143.578	-146.799
2012-12-19 01:18:40	141.06	144.25	10.3003	-143.792	-147.044
2012-12-19 01:28:40	141.34	144.5	10.3073	-144.077	-147.299
2012-12-19 01:38:40	141.58	144.75	10.3142	-144.322	-147.554
2012-12-19 01:48:40	141.85	144.99	10.3212	-144.597	-147.798
2012-12-19 01:58:40	142.08	145.26	10.3281	-144.832	-148.073	2012-12-19 01:58:40
2012-12-19 02:08:40	142.32	145.5	10.3351	-145.076	-148.318
2012-12-19 02:18:40	142.57	145.78	10.342	-145.331	-148.603
2012-12-19 02:28:40	142.85	146.01	10.3489	-145.617	-148.838
2012-12-19 02:38:40	143.08	146.28	10.3559	-145.851	-149.113
2012-12-19 02:48:40	143.34	146.56	10.3628	-146.116	-149.399
2012-12-19 02:58:40	143.58	146.81	10.3698	-146.361	-149.653	2012-12-19 02:58:40
2012-12-19 03:08:40	143.84	147.07	10.3767	-146.626	-149.918
2012-12-19 03:18:40	144.08	147.33	10.3837	-146.871	-150.183
2012-12-19 03:28:40	144.34	147.6	10.3906	-147.136	-150.459
2012-12-19 03:38:40	144.57	147.82	10.3976	-147.37	-150.683
2012-12-19 03:48:40	144.81	148.07	10.4045	-147.615	-150.938
2012-12-19 03:58:40	145.03	148.32	10.4114	-147.839	-151.193	2012-12-19 03:58:40
2012-12-19 04:08:40	145.28	148.55	10.4184	-148.094	-151.427
2012-12-19 04:18:40	145.52	148.79	10.4253	-148.338	-151.672
2012-12-19 04:28:40	145.77	149.01	10.4323	-148.593	-151.896
2012-12-19 04:38:40	145.99	149.26	10.4392	-148.818	-152.151
2012-12-19 04:48:40	146.23	149.5	10.4462	-149.062	-152.396
2012-12-19 04:58:40	146.46	149.78	10.4531	-149.297	-152.681	2012-12-19 04:58:40
2012-12-19 05:08:40	146.7	150.03	10.4601	-149.541	-152.936
2012-12-19 05:18:40	146.94	150.24	10.467	-149.786	-153.15
2012-12-19 05:28:40	147.19	150.47	10.4739	-150.041	-153.384
2012-12-19 05:38:40	147.41	150.76	10.4809	-150.265	-153.68
2012-12-19 05:48:40	147.65	150.99	10.4878	-150.51	-153.914
2012-12-19 05:58:40	147.87	151.22	10.4948	-150.734	-154.149	2012-12-19 05:58:40
2012-12-19 06:08:40	148.12	151.43	10.5017	-150.989	-154.363
2012-12-19 06:18:40	148.32	151.69	10.5087	-151.193	-154.628
2012-12-19 06:28:40	148.54	151.92	10.5156	-151.417	-154.862
2012-12-19 06:38:40	148.79	152.17	10.5226	-151.672	-155.117
2012-12-19 06:48:40	149.01	152.4	10.5295	-151.896	-155.352
2012-12-19 06:58:40	149.25	152.65	10.5364	-152.141	-155.607	2012-12-19 06:58:40
2012-12-19 07:08:40	149.45	152.88	10.5434	-152.345	-155.841
2012-12-19 07:18:40	149.67	153.1	10.5503	-152.569	-156.065
2012-12-19 07:28:40	149.92	153.36	10.5573	-152.824	-156.33
2012-12-19 07:38:40	150.15	153.58	10.5642	-153.058	-156.555
2012-12-19 07:48:40	150.36	153.83	10.5712	-153.272	-156.809
2012-12-19 07:58:40	150.59	154.05	10.5781	-153.507	-157.034	2012-12-19 07:58:40
2012-12-19 08:08:40	150.88	154.37	10.5851	-153.802	-157.36
2012-12-19 08:18:40	150.86	154.34	10.592	-153.782	-157.329
2012-12-19 08:28:40	151.11	154.68	10.5989	-154.037	-157.676
2012-12-19 08:38:40	151.35	154.93	10.6059	-154.281	-157.931
2012-12-19 08:48:40	151.59	155.18	10.6128	-154.526	-158.186
2012-12-19 08:58:40	151.81	155.42	10.6198	-154.75	-158.43	2012-12-19 08:58:40
2012-12-19 09:08:40	152.05	155.64	10.6267	-154.995	-158.654
2012-12-19 09:18:40	152.26	155.86	10.6337	-155.209	-158.879
2012-12-19 09:28:40	152.47	156.09	10.6406	-155.423	-159.113
2012-12-19 09:38:40	152.71	156.34	10.6476	-155.668	-159.368
2012-12-19 09:48:40	152.9	156.56	10.6545	-155.861	-159.592
2012-12-19 09:58:40	153.14	156.79	10.6614	-156.106	-159.827	2012-12-19 09:58:40
2012-12-19 10:08:40	153.37	157.04	10.6684	-156.34	-160.082
2012-12-19 10:18:40	153.56	157.23	10.6753	-156.534	-160.275
2012-12-19 10:28:40	153.77	157.46	10.6823	-156.748	-160.51
2012-12-19 10:38:40	153.97	157.68	10.6892	-156.952	-160.734
2012-12-19 10:48:40	154.2	157.92	10.6962	-157.187	-160.979
2012-12-19 10:58:40	154.43	158.16	10.7031	-157.421	-161.223	2012-12-19 10:58:40
2012-12-19 11:08:40	154.62	158.38	10.7101	-157.615	-161.448
2012-12-19 11:18:40	154.85	158.61	10.717	-157.849	-161.682
2012-12-19 11:28:40	155.06	158.84	10.7239	-158.063	-161.916
2012-12-19 11:38:40	155.27	159.07	10.7309	-158.277	-162.151
2012-12-19 11:48:40	155.49	159.3	10.7378	-158.502	-162.385
2012-12-19 11:58:40	155.72	159.51	10.7448	-158.736	-162.599	2012-12-19 11:58:40
2012-12-19 12:08:40	155.92	159.74	10.7517	-158.94	-162.834
2012-12-19 12:18:40	156.13	159.96	10.7587	-159.154	-163.058
2012-12-19 12:28:40	156.35	160.17	10.7656	-159.378	-163.272
2012-12-19 12:38:40	156.56	160.43	10.7726	-159.592	-163.537
2012-12-19 12:48:40	156.8	160.65	10.7795	-159.837	-163.761
2012-12-19 12:58:40	157.02	160.87	10.7864	-160.061	-163.986	2012-12-19 12:58:40
2012-12-19 13:08:40	157.23	161.08	10.7934	-160.275	-164.2
2012-12-19 13:18:40	157.42	161.31	10.8003	-160.469	-164.434
2012-12-19 13:28:40	157.63	161.52	10.8073	-160.683	-164.648
2012-12-19 13:38:40	157.84	161.75	10.8142	-160.897	-164.883
2012-12-19 13:48:40	158.06	161.96	10.8212	-161.121	-165.097
2012-12-19 13:58:40	158.26	162.19	10.8281	-161.325	-165.331	2012-12-19 13:58:40
2012-12-19 14:08:40	158.48	162.41	10.8351	-161.549	-165.556
2012-12-19 14:18:40	158.68	162.61	10.842	-161.753	-165.759
2012-12-19 14:28:40	158.88	162.84	10.8489	-161.957	-165.994
2012-12-19 14:38:40	159.09	163.07	10.8559	-162.171	-166.228
2012-12-19 14:48:40	159.29	163.27	10.8628	-162.375	-166.432
2012-12-19 14:58:40	159.47	163.46	10.8698	-162.559	-166.626	2012-12-19 14:58:40
2012-12-19 15:08:40	159.67	163.67	10.8767	-162.762	-166.84
2012-12-19 15:18:40	159.87	163.87	10.8837	-162.966	-167.044
2012-12-19 15:28:40	160.07	164.06	10.8906	-163.17	-167.238
2012-12-19 15:38:40	160.25	164.29	10.8976	-163.354	-167.472
2012-12-19 15:48:40	160.44	164.47	10.9045	-163.547	-167.655
2012-12-19 15:58:40	160.62	164.68	10.9114	-163.731	-167.87	2012-12-19 15:58:40
2012-12-19 16:08:40	160.82	164.89	10.9184	-163.935	-168.084
2012-12-19 16:18:40	161	165.09	10.9253	-164.118	-168.287
2012-12-19 16:28:40	161.27	165.37	10.9323	-164.393	-168.573
2012-12-19 16:38:40	161.47	165.53	10.9392	-164.597	-168.736
2012-12-19 16:48:40	161.06	165.11	10.9462	-164.179	-168.308
2012-12-19 16:58:40	161.63	165.71	10.9531	-164.76	-168.919	2012-12-19 16:58:40
2012-12-19 17:08:40	161.84	165.93	10.9601	-164.975	-169.144
2012-12-19 17:18:40	162.06	166.15	10.967	-165.199	-169.368
2012-12-19 17:28:40	162.25	166.34	10.9739	-165.392	-169.562
2012-12-19 17:38:40	162.47	166.57	10.9809	-165.617	-169.796
2012-12-19 17:48:40	162.65	166.77	10.9878	-165.8	-170
2012-12-19 17:58:40	162.86	167	10.9948	-166.014	-170.234	2012-12-19 17:58:40
2012-12-19 18:08:40	163.06	167.2	11.0017	-166.218	-170.438
2012-12-19 18:18:40	163.23	167.4	11.0087	-166.391	-170.642
2012-12-19 18:28:40	163.45	167.61	11.0156	-166.616	-170.856
2012-12-19 18:38:40	163.63	167.83	11.0226	-166.799	-171.081
2012-12-19 18:48:40	163.82	168.02	11.0295	-166.993	-171.274
2012-12-19 18:58:40	164.01	168.2	11.0364	-167.187	-171.458	2012-12-19 18:58:40
2012-12-19 19:08:40	164.2	168.4	11.0434	-167.38	-171.662
2012-12-19 19:18:40	164.39	168.62	11.0503	-167.574	-171.886
2012-12-19 19:28:40	164.56	168.84	11.0573	-167.747	-172.11
2012-12-19 19:38:40	164.75	169.03	11.0642	-167.941	-172.304
2012-12-19 19:48:40	164.95	169.23	11.0712	-168.145	-172.508
2012-12-19 19:58:40	165.13	169.43	11.0781	-168.328	-172.712	2012-12-19 19:58:40
2012-12-19 20:08:40	165.32	169.64	11.0851	-168.522	-172.926
2012-12-19 20:18:40	165.49	169.83	11.092	-168.695	-173.119
2012-12-19 20:28:40	165.69	170.04	11.0989	-168.899	-173.333
2012-12-19 20:38:40	165.87	170.23	11.1059	-169.083	-173.527
2012-12-19 20:48:40	166.06	170.44	11.1128	-169.276	-173.741
2012-12-19 20:58:40	166.24	170.64	11.1198	-169.46	-173.945	2012-12-19 20:58:40
2012-12-19 21:08:40	166.4	170.82	11.1267	-169.623	-174.128
2012-12-19 21:18:40	166.66	171.12	11.1337	-169.888	-174.434
2012-12-19 21:28:40	166.85	171.32	11.1406	-170.082	-174.638
2012-12-19 21:38:40	167.02	171.52	11.1476	-170.255	-174.842
2012-12-19 21:48:40	167.23	171.71	11.1545	-170.469	-175.036
2012-12-19 21:58:40	167.39	171.9	11.1614	-170.632	-175.229	2012-12-19 21:58:40
2012-12-19 22:08:40	167.57	172.08	11.1684	-170.815	-175.413
2012-12-19 22:18:40	167.75	172.27	11.1753	-170.999	-175.607
2012-12-19 22:28:40	167.92	172.43	11.1823	-171.172	-175.77
2012-12-19 22:38:40	168.08	172.64	11.1892	-171.335	-175.984
2012-12-19 22:48:40	168.27	172.82	11.1962	-171.529	-176.167
2012-12-19 22:58:40	168.43	173.02	11.2031	-171.692	-176.371	2012-12-19 22:58:40
2012-12-19 23:08:40	168.6	173.21	11.2101	-171.865	-176.565
2012-12-19 23:18:40	168.77	173.39	11.217	-172.039	-176.748
2012-12-19 23:28:40	168.91	173.57	11.2239	-172.181	-176.932
2012-12-19 23:38:40	169.09	173.72	11.2309	-172.365	-177.085
2012-12-19 23:48:40	169.26	173.92	11.2378	-172.538	-177.288
2012-12-19 23:58:40	169.39	174.1	11.2448	-172.671	-177.472	2012-12-19 23:58:40
2012-12-20 00:08:40	169.52	174.28	11.2517	-172.803	-177.655
2012-12-20 00:18:40	169.72	174.45	11.2587	-173.007	-177.829
2012-12-20 00:28:40	169.9	174.66	11.2656	-173.191	-178.043
2012-12-20 00:38:40	170.07	174.84	11.2726	-173.364	-178.226
2012-12-20 00:48:40	170.23	175.03	11.2795	-173.527	-178.42
2012-12-20 00:58:40	170.4	175.21	11.2864	-173.7	-178.603	2012-12-20 00:58:40
2012-12-20 01:08:40	170.56	175.4	11.2934	-173.863	-178.797
2012-12-20 01:18:40	170.71	175.57	11.3003	-174.016	-178.97
2012-12-20 01:28:40	170.87	175.79	11.3073	-174.179	-179.195
2012-12-20 01:38:40	171.07	175.94	11.3142	-174.383	-179.348
2012-12-20 01:48:40	171.23	176.12	11.3212	-174.546	-179.531
2012-12-20 01:58:40	171.39	176.32	11.3281	-174.709	-179.735	2012-12-20 01:58:40
2012-12-20 02:08:40	171.55	176.5	11.3351	-174.873	-179.918
2012-12-20 02:18:40	171.72	176.69	11.342	-175.046	-180.112
2012-12-20 02:28:40	171.87	176.88	11.3489	-175.199	-180.306
2012-12-20 02:38:40	172.04	177.04	11.3559	-175.372	-180.469
2012-12-20 02:48:40	172.19	177.23	11.3628	-175.525	-180.663
2012-12-20 02:58:40	172.34	177.4	11.3698	-175.678	-180.836	2012-12-20 02:58:40
2012-12-20 03:08:40	172.5	177.54	11.3767	-175.841	-180.979
2012-12-20 03:18:40	172.65	177.73	11.3837	-175.994	-181.172
2012-12-20 03:28:40	172.8	177.94	11.3906	-176.147	-181.386
2012-12-20 03:38:40	172.96	178.07	11.3976	-176.31	-181.519
2012-12-20 03:48:40	173.11	178.29	11.4045	-176.463	-181.743
2012-12-20 03:58:40	173.26	178.47	11.4114	-176.616	-181.927	2012-12-20 03:58:40
2012-12-20 04:08:40	173.41	178.66	11.4184	-176.769	-182.12
2012-12-20 04:18:40	173.56	178.83	11.4253	-176.922	-182.294
2012-12-20 04:28:40	173.72	179.02	11.4323	-177.085	-182.487
2012-12-20 04:38:40	173.87	179.18	11.4392	-177.238	-182.65
2012-12-20 04:48:40	174.03	179.35	11.4462	-177.401	-182.824
2012-12-20 04:58:40	174.16	179.53	11.4531	-177.533	-183.007	2012-12-20 04:58:40
2012-12-20 05:08:40	174.33	179.69	11.4601	-177.706	-183.17
2012-12-20 05:18:40	174.49	179.88	11.467	-177.87	-183.364
2012-12-20 05:28:40	174.62	180.07	11.4739	-178.002	-183.558
2012-12-20 05:38:40	174.79	180.21	11.4809	-178.175	-183.7
2012-12-20 05:48:40	174.91	180.41	11.4878	-178.298	-183.904
2012-12-20 05:58:40	175.06	180.61	11.4948	-178.451	-184.108	2012-12-20 05:58:40
2012-12-20 06:08:40	175.22	180.8	11.5017	-178.614	-184.302
2012-12-20 06:18:40	175.34	180.95	11.5087	-178.736	-184.455
2012-12-20 06:28:40	175.51	181.16	11.5156	-178.909	-184.669
2012-12-20 06:38:40	175.67	181.32	11.5226	-179.072	-184.832
2012-12-20 06:48:40	175.81	181.41	11.5295	-179.215	-184.924
2012-12-20 06:58:40	175.96	181.69	11.5364	-179.368	-185.209	2012-12-20 06:58:40
2012-12-20 07:08:40	176.09	181.85	11.5434	-179.501	-185.372
2012-12-20 07:18:40	176.21	182.01	11.5503	-179.623	-185.535
2012-12-20 07:28:40	176.37	182.18	11.5573	-179.786	-185.708
2012-12-20 07:38:40	176.5	182.35	11.5642	-179.918	-185.882
2012-12-20 07:48:40	176.62	182.5	11.5712	-180.041	-186.035
2012-12-20 07:58:40	176.71	182.66	11.5781	-180.133	-186.198	2012-12-20 07:58:40
2012-12-20 08:08:40	176.85	182.78	11.5851	-180.275	-186.32
2012-12-20 08:18:40	176.98	182.93	11.592	-180.408	-186.473
2012-12-20 08:28:40	173.09	177.88	11.5989	-176.442	-181.325
2012-12-20 08:38:40	176.9	182.95	11.6059	-180.326	-186.493
2012-12-20 08:48:40	177.1	183.19	11.6128	-180.53	-186.738
2012-12-20 08:58:40	177.25	183.37	11.6198	-180.683	-186.922	2012-12-20 08:58:40
2012-12-20 09:08:40	177.42	183.58	11.6267	-180.856	-187.136
2012-12-20 09:18:40	177.56	183.76	11.6337	-180.999	-187.319
2012-12-20 09:28:40	177.73	183.99	11.6406	-181.172	-187.554
2012-12-20 09:38:40	177.87	184.15	11.6476	-181.315	-187.717
2012-12-20 09:48:40	178.11	184.45	11.6545	-181.56	-188.022
2012-12-20 09:58:40	178.26	184.64	11.6614	-181.713	-188.216	2012-12-20 09:58:40
2012-12-20 10:08:40	178.42	184.82	11.6684	-181.876	-188.4
2012-12-20 10:18:40	178.54	185.02	11.6753	-181.998	-188.603
2012-12-20 10:28:40	178.7	185.17	11.6823	-182.161	-188.756
2012-12-20 10:38:40	178.81	185.35	11.6892	-182.273	-188.94
2012-12-20 10:48:40	178.93	185.49	11.6962	-182.396	-189.083
2012-12-20 10:58:40	179.04	185.65	11.7031	-182.508	-189.246	2012-12-20 10:58:40
2012-12-20 11:08:40	179.15	185.73	11.7101	-182.62	-189.327
2012-12-20 11:18:40	179.24	185.97	11.717	-182.712	-189.572
2012-12-20 11:28:40	179.37	186.06	11.7239	-182.844	-189.664
2012-12-20 11:38:40	178.95	185.73	11.7309	-182.416	-189.327
2012-12-20 11:48:40	179.56	186.4	11.7378	-183.038	-190.01
2012-12-20 11:58:40	174.14	183.13	11.7448	-177.513	-186.677	2012-12-20 11:58:40
2012-12-20 12:08:40	179.47	186.4	11.7517	-182.946	-190.01
2012-12-20 12:18:40	179.6	186.62	11.7587	-183.078	-190.234
2012-12-20 12:28:40	179.74	186.83	11.7656	-183.221	-190.449
2012-12-20 12:38:40	179.89	187.02	11.7726	-183.374	-190.642
2012-12-20 12:48:40	180.05	187.25	11.7795	-183.537	-190.877
2012-12-20 12:58:40	180.21	187.49	11.7864	-183.7	-191.121	2012-12-20 12:58:40
2012-12-20 13:08:40	180.37	187.72	11.7934	-183.863	-191.356
2012-12-20 13:18:40	180.54	187.98	11.8003	-184.037	-191.621
2012-12-20 13:28:40	180.72	188.2	11.8073	-184.22	-191.845
2012-12-20 13:38:40	180.87	188.45	11.8142	-184.373	-192.1
2012-12-20 13:48:40	181.05	188.65	11.8212	-184.557	-192.304
2012-12-20 13:58:40	181.22	188.88	11.8281	-184.73	-192.538	2012-12-20 13:58:40
2012-12-20 14:08:40	181.39	189.11	11.8351	-184.903	-192.773
2012-12-20 14:18:40	181.51	189.33	11.842	-185.025	-192.997
2012-12-20 14:28:40	181.72	189.56	11.8489	-185.24	-193.231
2012-12-20 14:38:40	181.85	189.75	11.8559	-185.372	-193.425
2012-12-20 14:48:40	182.02	189.96	11.8628	-185.545	-193.639
2012-12-20 14:58:40	182.14	190.13	11.8698	-185.668	-193.812	2012-12-20 14:58:40
2012-12-20 15:08:40	182.31	190.38	11.8767	-185.841	-194.067
2012-12-20 15:18:40	182.46	190.59	11.8837	-185.994	-194.281
2012-12-20 15:28:40	182.62	190.82	11.8906	-186.157	-194.516
2012-12-20 15:38:40	182.78	191	11.8976	-186.32	-194.699
2012-12-20 15:48:40	182.89	191.2	11.9045	-186.432	-194.903
2012-12-20 15:58:40	183.05	191.35	11.9114	-186.595	-195.056	2012-12-20 15:58:40
2012-12-20 16:08:40	183.21	191.53	11.9184	-186.758	-195.24
2012-12-20 16:18:40	183.36	191.79	11.9253	-186.911	-195.505
2012-12-20 16:28:40	183.49	191.99	11.9323	-187.044	-195.708
2012-12-20 16:38:40	183.61	192.19	11.9392	-187.166	-195.912
2012-12-20 16:48:40	183.77	192.39	11.9462	-187.329	-196.116
2012-12-20 16:58:40	183.92	192.6	11.9531	-187.482	-196.33	2012-12-20 16:58:40
2012-12-20 17:08:40	184.07	192.8	11.9601	-187.635	-196.534
2012-12-20 17:18:40	184.2	192.99	11.967	-187.768	-196.728
2012-12-20 17:28:40	182.58	191.76	11.9739	-186.116	-195.474
2012-12-20 17:38:40	184.41	193.23	11.9809	-187.982	-196.972
2012-12-20 17:48:40	184.56	193.42	11.9878	-188.135	-197.166
2012-12-20 17:58:40	184.74	193.68	11.9948	-188.318	-197.431	2012-12-20 17:58:40
2012-12-20 18:08:40	184.88	193.87	12.0017	-188.461	-197.625
2012-12-20 18:18:40	185.05	194.1	12.0087	-188.634	-197.859
2012-12-20 18:28:40	185.18	194.25	12.0156	-188.767	-198.012
2012-12-20 18:38:40	185.31	194.48	12.0226	-188.899	-198.247
2012-12-20 18:48:40	185.47	194.61	12.0295	-189.062	-198.379
2012-12-20 18:58:40	185.6	194.82	12.0364	-189.195	-198.593	2012-12-20 18:58:40
2012-12-20 19:08:40	185.72	195.03	12.0434	-189.317	-198.807
2012-12-20 19:18:40	185.87	195.22	12.0503	-189.47	-199.001
2012-12-20 19:28:40	186	195.38	12.0573	-189.602	-199.164
2012-12-20 19:38:40	186.15	195.6	12.0642	-189.755	-199.388
2012-12-20 19:48:40	186.28	195.8	12.0712	-189.888	-199.592
2012-12-20 19:58:40	186.43	195.99	12.0781	-190.041	-199.786	2012-12-20 19:58:40
2012-12-20 20:08:40	186.56	196.18	12.0851	-190.173	-199.98
2012-12-20 20:18:40	186.7	196.37	12.092	-190.316	-200.173
2012-12-20 20:28:40	186.82	196.57	12.0989	-190.438	-200.377
2012-12-20 20:38:40	186.96	196.75	12.1059	-190.581	-200.561
2012-12-20 20:48:40	187.12	196.89	12.1128	-190.744	-200.703
2012-12-20 20:58:40	187.26	197.12	12.1198	-190.887	-200.938	2012-12-20 20:58:40
2012-12-20 21:08:40	187.4	197.32	12.1267	-191.03	-201.142
2012-12-20 21:18:40	187.53	197.46	12.1337	-191.162	-201.284
2012-12-20 21:28:40	187.65	197.58	12.1406	-191.284	-201.407
2012-12-20 21:38:40	187.78	197.81	12.1476	-191.417	-201.641
2012-12-20 21:48:40	187.9	198.01	12.1545	-191.539	-201.845
2012-12-20 21:58:40	188.03	198.23	12.1614	-191.672	-202.069	2012-12-20 21:58:40
2012-12-20 22:08:40	188.17	198.39	12.1684	-191.814	-202.232
2012-12-20 22:18:40	188.29	198.58	12.1753	-191.937	-202.426
2012-12-20 22:28:40	188.46	198.75	12.1823	-192.11	-202.599
2012-12-20 22:38:40	188.56	198.92	12.1892	-192.212	-202.773
2012-12-20 22:48:40	188.6	199.08	12.1962	-192.253	-202.936
2012-12-20 22:58:40	187.66	199.24	12.2031	-191.295	-203.099	2012-12-20 22:58:40
2012-12-20 23:08:40	188.81	199.47	12.2101	-192.467	-203.333
2012-12-20 23:18:40	189	199.61	12.217	-192.661	-203.476
2012-12-20 23:28:40	189.15	199.8	12.2239	-192.813	-203.67
2012-12-20 23:38:40	189.29	199.99	12.2309	-192.956	-203.863
2012-12-20 23:48:40	189.42	200.22	12.2378	-193.089	-204.098
2012-12-20 23:58:40	189.54	200.36	12.2448	-193.211	-204.241	2012-12-20 23:58:40
2012-12-21 00:08:40	189.65	200.52	12.2517	-193.323	-204.404
2012-12-21 00:18:40	189.66	200.7	12.2587	-193.333	-204.587
2012-12-21 00:28:40	189.92	200.84	12.2656	-193.598	-204.73
2012-12-21 00:38:40	190.04	201.03	12.2726	-193.721	-204.924
2012-12-21 00:48:40	190.19	201.24	12.2795	-193.874	-205.138
2012-12-21 00:58:40	190.3	201.38	12.2864	-193.986	-205.28	2012-12-21 00:58:40
2012-12-21 01:08:40	190.42	201.56	12.2934	-194.108	-205.464
2012-12-21 01:18:40	190.54	201.72	12.3003	-194.23	-205.627
2012-12-21 01:28:40	190.68	201.89	12.3073	-194.373	-205.8
2012-12-21 01:38:40	190.78	202.09	12.3142	-194.475	-206.004
2012-12-21 01:48:40	190.93	202.23	12.3212	-194.628	-206.147
2012-12-21 01:58:40	191.04	202.41	12.3281	-194.74	-206.33	2012-12-21 01:58:40
2012-12-21 02:08:40	191.17	202.57	12.3351	-194.873	-206.493
2012-12-21 02:18:40	191.25	202.75	12.342	-194.954	-206.677
2012-12-21 02:28:40	191.41	202.95	12.3489	-195.117	-206.881
2012-12-21 02:38:40	191.52	203.11	12.3559	-195.229	-207.044
2012-12-21 02:48:40	191.64	203.29	12.3628	-195.352	-207.227
2012-12-21 02:58:40	188.69	203.42	12.3698	-192.345	-207.36	2012-12-21 02:58:40
2012-12-21 03:08:40	191.66	203.64	12.3767	-195.372	-207.584
2012-12-21 03:18:40	191.85	203.79	12.3837	-195.566	-207.737
2012-12-21 03:28:40	191.96	203.99	12.3906	-195.678	-207.941
2012-12-21 03:38:40	192.16	204.11	12.3976	-195.882	-208.063
2012-12-21 03:48:40	192.3	204.3	12.4045	-196.024	-208.257
2012-12-21 03:58:40	192.44	204.47	12.4114	-196.167	-208.43	2012-12-21 03:58:40
2012-12-21 04:08:40	192.57	204.64	12.4184	-196.3	-208.603
2012-12-21 04:18:40	192.68	204.86	12.4253	-196.412	-208.828
2012-12-21 04:28:40	192.82	205.04	12.4323	-196.555	-209.011
2012-12-21 04:38:40	192.92	205.26	12.4392	-196.656	-209.235
2012-12-21 04:48:40	193.06	205.39	12.4462	-196.799	-209.368
2012-12-21 04:58:40	193.16	205.61	12.4531	-196.901	-209.592	2012-12-21 04:58:40
2012-12-21 05:08:40	193.3	205.8	12.4601	-197.044	-209.786
2012-12-21 05:18:40	193.42	205.98	12.467	-197.166	-209.969
2012-12-21 05:28:40	193.57	206.08	12.4739	-197.319	-210.071
2012-12-21 05:38:40	193.68	206.33	12.4809	-197.431	-210.326
2012-12-21 05:48:40	193.82	206.54	12.4878	-197.574	-210.54
2012-12-21 05:58:40	193.95	206.71	12.4948	-197.706	-210.714	2012-12-21 05:58:40
2012-12-21 06:08:40	194.06	206.92	12.5017	-197.819	-210.928
2012-12-21 06:18:40	194.2	207.07	12.5087	-197.961	-211.081
2012-12-21 06:28:40	194.3	207.22	12.5156	-198.063	-211.233
2012-12-21 06:38:40	194.39	207.4	12.5226	-198.155	-211.417
2012-12-21 06:48:40	194.53	207.5	12.5295	-198.298	-211.519
2012-12-21 06:58:40	194.66	207.77	12.5364	-198.43	-211.794	2012-12-21 06:58:40
2012-12-21 07:08:40	194.77	207.93	12.5434	-198.542	-211.957
2012-12-21 07:18:40	194.9	208.16	12.5503	-198.675	-212.192
2012-12-21 07:28:40	195.01	208.3	12.5573	-198.787	-212.334
2012-12-21 07:38:40	195.1	208.49	12.5642	-198.879	-212.528
2012-12-21 07:48:40	195.24	208.63	12.5712	-199.021	-212.671
2012-12-21 07:58:40	195.34	208.86	12.5781	-199.123	-212.905	2012-12-21 07:58:40
2012-12-21 08:08:40	195.47	208.96	12.5851	-199.256	-213.007
2012-12-21 08:18:40	182.36	200.97	12.592	-185.892	-204.862
2012-12-21 08:28:40	193.47	208.9	12.5989	-197.217	-212.946
2012-12-21 08:38:40	195.15	209.32	12.6059	-198.93	-213.374
2012-12-21 08:48:40	195.53	209.5	12.6128	-199.317	-213.558
2012-12-21 08:58:40	195.69	209.74	12.6198	-199.48	-213.802	2012-12-21 08:58:40
2012-12-21 09:08:40	195.85	209.92	12.6267	-199.643	-213.986
2012-12-21 09:18:40	195.95	210.08	12.6337	-199.745	-214.149
2012-12-21 09:28:40	196.11	210.25	12.6406	-199.908	-214.322
2012-12-21 09:38:40	196.23	210.47	12.6476	-200.031	-214.546
2012-12-21 09:48:40	196.33	210.67	12.6545	-200.133	-214.75
2012-12-21 09:58:40	196.45	210.89	12.6614	-200.255	-214.975	2012-12-21 09:58:40
2012-12-21 10:08:40	196.6	211.02	12.6684	-200.408	-215.107
2012-12-21 10:18:40	196.73	211.21	12.6753	-200.54	-215.301
2012-12-21 10:28:40	196.84	211.35	12.6823	-200.652	-215.443
2012-12-21 10:38:40	196.98	211.65	12.6892	-200.795	-215.749
2012-12-21 10:48:40	197.06	211.81	12.6962	-200.877	-215.912
2012-12-21 10:58:40	197.19	212.02	12.7031	-201.009	-216.126	2012-12-21 10:58:40
2012-12-21 11:08:40	197.34	212.24	12.7101	-201.162	-216.351
2012-12-21 11:18:40	197.44	212.42	12.717	-201.264	-216.534
2012-12-21 11:28:40	197.53	212.56	12.7239	-201.356	-216.677
2012-12-21 11:38:40	197.68	212.76	12.7309	-201.509	-216.881
2012-12-21 11:48:40	197.79	212.93	12.7378	-201.621	-217.054
2012-12-21 11:58:40	197.92	213.18	12.7448	-201.753	-217.309	2012-12-21 11:58:40
2012-12-21 12:08:40	198.03	213.38	12.7517	-201.865	-217.513
2012-12-21 12:18:40	198.11	213.58	12.7587	-201.947	-217.717
2012-12-21 12:28:40	198.27	213.74	12.7656	-202.11	-217.88
2012-12-21 12:38:40	198.39	213.93	12.7726	-202.232	-218.073
2012-12-21 12:48:40	198.51	214.12	12.7795	-202.355	-218.267
2012-12-21 12:58:40	198.6	214.34	12.7864	-202.446	-218.491	2012-12-21 12:58:40
2012-12-21 13:08:40	198.73	214.49	12.7934	-202.579	-218.644
2012-12-21 13:18:40	198.83	214.73	12.8003	-202.681	-218.889
2012-12-21 13:28:40	198.94	214.93	12.8073	-202.793	-219.093
2012-12-21 13:38:40	199.04	215.05	12.8142	-202.895	-219.215
2012-12-21 13:48:40	199.15	215.3	12.8212	-203.007	-219.47
2012-12-21 13:58:40	199.31	215.49	12.8281	-203.17	-219.664	2012-12-21 13:58:40
2012-12-21 14:08:40	199.45	215.74	12.8351	-203.313	-219.918
2012-12-21 14:18:40	199.54	215.91	12.842	-203.405	-220.092
2012-12-21 14:28:40	199.66	216.1	12.8489	-203.527	-220.285
2012-12-21 14:38:40	199.77	216.33	12.8559	-203.639	-220.52
2012-12-21 14:48:40	199.88	216.54	12.8628	-203.751	-220.734
2012-12-21 14:58:40	199.99	216.75	12.8698	-203.863	-220.948	2012-12-21 14:58:40
2012-12-21 15:08:40	200.12	216.95	12.8767	-203.996	-221.152
2012-12-21 15:18:40	200.26	217.16	12.8837	-204.139	-221.366
2012-12-21 15:28:40	200.39	217.38	12.8906	-204.271	-221.59
2012-12-21 15:38:40	200.51	217.61	12.8976	-204.393	-221.825
2012-12-21 15:48:40	200.62	217.83	12.9045	-204.506	-222.049
2012-12-21 15:58:40	200.76	217.98	12.9114	-204.648	-222.202	2012-12-21 15:58:40
2012-12-21 16:08:40	200.88	218.26	12.9184	-204.771	-222.487
2012-12-21 16:18:40	201.02	218.48	12.9253	-204.913	-222.712
2012-12-21 16:28:40	201.15	218.72	12.9323	-205.046	-222.956
2012-12-21 16:38:40	201.24	218.87	12.9392	-205.138	-223.109
2012-12-21 16:48:40	201.41	219.13	12.9462	-205.311	-223.374
2012-12-21 16:58:40	201.5	219.33	12.9531	-205.403	-223.578	2012-12-21 16:58:40
2012-12-21 17:08:40	201.63	219.53	12.9601	-205.535	-223.782
2012-12-21 17:18:40	201.71	219.76	12.967	-205.617	-224.016
2012-12-21 17:28:40	201.86	219.99	12.9739	-205.77	-224.251
2012-12-21 17:38:40	201.99	220.23	12.9809	-205.902	-224.495
2012-12-21 17:48:40	202.11	220.43	12.9878	-206.024	-224.699
2012-12-21 17:58:40	202.23	220.69	12.9948	-206.147	-224.964	2012-12-21 17:58:40
2012-12-21 18:08:40	202.36	220.93	13.0017	-206.279	-225.209
2012-12-21 18:18:40	202.53	221.14	13.0087	-206.453	-225.423
2012-12-21 18:28:40	198.49	219.76	13.0156	-202.334	-224.016
2012-12-21 18:38:40	198.53	217.22	13.0226	-202.375	-221.427
2012-12-21 18:48:40	202.18	221	13.0295	-206.096	-225.28
2012-12-21 18:58:40	203.19	221.68	13.0364	-207.125	-225.973	2012-12-21 18:58:40
2012-12-21 19:08:40	203.56	222.05	13.0434	-207.503	-226.351
2012-12-21 19:18:40	203.77	222.36	13.0503	-207.717	-226.667
2012-12-21 19:28:40	203.96	222.61	13.0573	-207.91	-226.922
2012-12-21 19:38:40	204.12	222.88	13.0642	-208.073	-227.197
2012-12-21 19:48:40	204.32	223.1	13.0712	-208.277	-227.421
2012-12-21 19:58:40	204.48	223.4	13.0781	-208.44	-227.727	2012-12-21 19:58:40
2012-12-21 20:08:40	204.6	223.61	13.0851	-208.563	-227.941
2012-12-21 20:18:40	204.77	223.88	13.092	-208.736	-228.216
2012-12-21 20:28:40	204.91	224.14	13.0989	-208.879	-228.481
2012-12-21 20:38:40	205.04	224.4	13.1059	-209.011	-228.746
2012-12-21 20:48:40	205.12	224.64	13.1128	-209.093	-228.991
2012-12-21 20:58:40	205.33	224.92	13.1198	-209.307	-229.276	2012-12-21 20:58:40
2012-12-21 21:08:40	205.49	225.14	13.1267	-209.47	-229.501
2012-12-21 21:18:40	205.61	225.4	13.1337	-209.592	-229.766
2012-12-21 21:28:40	205.75	225.68	13.1406	-209.735	-230.051
2012-12-21 21:38:40	205.89	225.92	13.1476	-209.878	-230.296
2012-12-21 21:48:40	206.04	226.12	13.1545	-210.031	-230.499
2012-12-21 21:58:40	206.15	226.35	13.1614	-210.143	-230.734	2012-12-21 21:58:40
2012-12-21 22:08:40	206.31	226.65	13.1684	-210.306	-231.04
2012-12-21 22:18:40	206.43	226.84	13.1753	-210.428	-231.233
2012-12-21 22:28:40	206.53	227.14	13.1823	-210.53	-231.539
2012-12-21 22:38:40	206.66	227.4	13.1892	-210.663	-231.804
2012-12-21 22:48:40	206.79	227.66	13.1962	-210.795	-232.069
2012-12-21 22:58:40	206.85	227.9	13.2031	-210.856	-232.314	2012-12-21 22:58:40
2012-12-21 23:08:40	207.05	228.26	13.2101	-211.06	-232.681
2012-12-21 23:18:40	207.21	228.48	13.217	-211.223	-232.905
2012-12-21 23:28:40	207.4	228.78	13.2239	-211.417	-233.211
2012-12-21 23:38:40	207.55	229.04	13.2309	-211.57	-233.476
2012-12-21 23:48:40	207.72	229.23	13.2378	-211.743	-233.67
2012-12-21 23:58:40	207.82	229.55	13.2448	-211.845	-233.996	2012-12-21 23:58:40
2012-12-22 00:08:40	207.97	229.77	13.2517	-211.998	-234.22
2012-12-22 00:18:40	208.1	230.04	13.2587	-212.13	-234.495
2012-12-22 00:28:40	208.25	230.3	13.2656	-212.283	-234.76
2012-12-22 00:38:40	208.39	230.6	13.2726	-212.426	-235.066
2012-12-22 00:48:40	208.54	230.91	13.2795	-212.579	-235.382
2012-12-22 00:58:40	208.66	231.15	13.2864	-212.701	-235.627	2012-12-22 00:58:40
2012-12-22 01:08:40	208.81	231.42	13.2934	-212.854	-235.902
2012-12-22 01:18:40	208.95	231.73	13.3003	-212.997	-236.218
2012-12-22 01:28:40	209.09	231.95	13.3073	-213.14	-236.442
2012-12-22 01:38:40	209.23	232.26	13.3142	-213.282	-236.758
2012-12-22 01:48:40	209.33	232.57	13.3212	-213.384	-237.074
2012-12-22 01:58:40	209.46	232.83	13.3281	-213.517	-237.339	2012-12-22 01:58:40
2012-12-22 02:08:40	209.65	233.12	13.3351	-213.71	-237.635
2012-12-22 02:18:40	209.78	233.38	13.342	-213.843	-237.9
2012-12-22 02:28:40	209.9	233.6	13.3489	-213.965	-238.124
2012-12-22 02:38:40	210.05	234	13.3559	-214.118	-238.532
2012-12-22 02:48:40	210.22	234.28	13.3628	-214.292	-238.818
2012-12-22 02:58:40	210.32	234.49	13.3698	-214.393	-239.032	2012-12-22 02:58:40
2012-12-22 03:08:40	210.52	234.85	13.3767	-214.597	-239.399
2012-12-22 03:18:40	210.66	235.14	13.3837	-214.74	-239.694
2012-12-22 03:28:40	210.78	235.43	13.3906	-214.862	-239.99
2012-12-22 03:38:40	210.9	235.67	13.3976	-214.985	-240.234
2012-12-22 03:48:40	211.06	235.97	13.4045	-215.148	-240.54
2012-12-22 03:58:40	211.19	236.28	13.4114	-215.28	-240.856	2012-12-22 03:58:40
2012-12-22 04:08:40	211.35	236.62	13.4184	-215.443	-241.203
2012-12-22 04:18:40	211.45	236.92	13.4253	-215.545	-241.509
2012-12-22 04:28:40	211.59	237.23	13.4323	-215.688	-241.825
2012-12-22 04:38:40	211.78	237.47	13.4392	-215.882	-242.069
2012-12-22 04:48:40	211.92	237.81	13.4462	-216.024	-242.416
2012-12-22 04:58:40	212.07	238.15	13.4531	-216.177	-242.762	2012-12-22 04:58:40
2012-12-22 05:08:40	212.18	238.44	13.4601	-216.29	-243.058
2012-12-22 05:18:40	212.33	238.74	13.467	-216.442	-243.364
2012-12-22 05:28:40	212.46	239.12	13.4739	-216.575	-243.751
2012-12-22 05:38:40	212.6	239.42	13.4809	-216.718	-244.057
2012-12-22 05:48:40	212.76	239.73	13.4878	-216.881	-244.373
2012-12-22 05:58:40	212.95	240.05	13.4948	-217.074	-244.699	2012-12-22 05:58:40
2012-12-22 06:08:40	213.07	240.31	13.5017	-217.197	-244.964
2012-12-22 06:18:40	213.22	240.67	13.5087	-217.35	-245.331
2012-12-22 06:28:40	213.37	241.01	13.5156	-217.503	-245.678
2012-12-22 06:38:40	213.4	241.33	13.5226	-217.533	-246.004
2012-12-22 06:48:40	213.64	241.64	13.5295	-217.778	-246.32
2012-12-22 06:58:40	213.8	241.94	13.5364	-217.941	-246.626	2012-12-22 06:58:40
2012-12-22 07:08:40	213.79	242.29	13.5434	-217.931	-246.983
2012-12-22 07:18:40	213.98	242.6	13.5503	-218.124	-247.299
2012-12-22 07:28:40	214.12	242.93	13.5573	-218.267	-247.635
2012-12-22 07:38:40	214.23	243.26	13.5642	-218.379	-247.971
2012-12-22 07:48:40	214.42	243.61	13.5712	-218.573	-248.328
2012-12-22 07:58:40	214.56	243.92	13.5781	-218.716	-248.644	2012-12-22 07:58:40
2012-12-22 08:08:40	214.7	244.3	13.5851	-218.858	-249.032
2012-12-22 08:18:40	214.87	244.62	13.592	-219.032	-249.358
2012-12-22 08:28:40	215.01	244.98	13.5989	-219.174	-249.725
2012-12-22 08:38:40	215.15	245.32	13.6059	-219.317	-250.071
2012-12-22 08:48:40	215.3	245.65	13.6128	-219.47	-250.408
2012-12-22 08:58:40	215.4	245.98	13.6198	-219.572	-250.744	2012-12-22 08:58:40
2012-12-22 09:08:40	215.58	246.41	13.6267	-219.755	-251.182
2012-12-22 09:18:40	215.73	246.75	13.6337	-219.908	-251.529
2012-12-22 09:28:40	215.89	247.07	13.6406	-220.071	-251.855
2012-12-22 09:38:40	216.07	247.46	13.6476	-220.255	-252.253
2012-12-22 09:48:40	200.23	228.07	13.6545	-204.108	-232.487
2012-12-22 09:58:40	214.57	245.29	13.6614	-218.726	-250.041	2012-12-22 09:58:40
[truncated: 1,308 more rows]

## Sheet: Tensi
Zeit [d]	MP bot(2) [cm]	MP top(1) [cm]		air entry bot		AE time	AE [cm]	Type	Pos	Weight
0.00342918	-4.42406	-6.9317		2012-12-31 06:08:40	8800	22.5017	-8970.44	1	2	1
0.0159292	-4.96432	-7.51274
0.0450958	-6.02446	-8.58308		air entry top
0.0867625	-7.30887	-9.85729		Time				Type	Pos	Weight
0.11454	-7.9103	-10.4485		2012-12-27 22:38:40	8800	19.1892	-8970.44	1	1	1
0.628429	-9.05199	-11.6208
0.670096	-9.62283	-12.1611
0.711763	-10.1835	-12.7727
0.753429	-10.1733	-12.7829
0.795096	-11.0499	-13.6493
0.836763	-11.6004	-14.1998
0.878429	-12.1305	-14.7503
0.92704	-12.3242	-14.893
0.982596	-13.0377	-15.5963
1.02426	-13.5678	-16.1672
1.06593	-14.1182	-16.7176
1.1076	-14.526	-17.105
1.14926	-15.0663	-17.6453
1.19093	-15.5148	-18.0938
1.2326	-16.0041	-18.6035
1.27426	-16.4118	-18.9908
1.31593	-16.84	-19.3986
1.3576	-17.3191	-19.9083
1.39926	-17.7166	-20.265
1.44093	-18.0836	-20.6932
1.4826	-18.4811	-21.0907
1.52426	-18.6748	-21.2436
1.56593	-19.052	-21.6412
1.6076	-19.2661	-21.8654
1.64926	-19.3782	-21.9572
1.69093	-19.7248	-22.3038
1.7326	-20	-22.579
1.77426	-20.3466	-22.8848
1.79547	-20.4383	-23.0173
1.79964	-20.4791	-23.0479
1.8038	-20.5199	-23.0887
1.80797	-20.5607	-23.1397
1.81214	-20.581	-23.1498
1.8163	-20.6014	-23.1906
1.82047	-20.6524	-23.2212
1.82464	-20.683	-23.262
1.8288	-20.6932	-23.262
1.83297	-20.7441	-23.3129
1.85589	-20.8665	-23.4149
1.89755	-21.1111	-23.6391
1.93922	-21.4067	-23.9755
1.98089	-21.6412	-24.2202
2.02255	-21.7737	-24.3119
2.06422	-22.0387	-24.6075
2.10589	-22.3038	-24.8726
2.14755	-22.5382	-25.1172
2.18922	-22.7523	-25.3211
2.23089	-22.8542	-25.4434
2.27255	-23.0887	-25.6779
2.31422	-23.0581	-25.6371
2.35589	-23.3028	-25.8919
2.39755	-23.5168	-26.106
2.43922	-23.6901	-26.2691
2.48089	-23.894	-26.473
2.52255	-24.0571	-26.6463
2.56422	-24.1794	-26.7686
2.60589	-24.4444	-27.0336
2.64755	-24.5464	-27.1152
2.68922	-24.5566	-27.1356
2.73089	-24.5056	-27.0744
2.77255	-24.7197	-27.2783
2.81422	-24.7706	-27.3496
2.85589	-24.9949	-27.5229
2.89755	-25.1886	-27.7166
2.93922	-25.423	-27.9817
2.98089	-23.9348	-26.524
3.02255	-25.2294	-27.7982
3.06422	-25.474	-28.053
3.10589	-25.79	-28.3588
3.14755	-26.0041	-28.5729
3.18922	-26.2691	-28.8379
3.23089	-26.4832	-29.0316
3.27255	-26.6769	-29.2457
3.31422	-26.84	-29.419
3.35589	-27.1152	-29.6738
3.39755	-27.3089	-29.8879
3.43922	-27.4924	-30.0612
3.48089	-27.6351	-30.1937
3.52255	-27.8287	-30.3976
3.56422	-27.9918	-30.5708
3.60589	-28.1957	-30.7543
3.64755	-28.0734	-30.632
3.68922	-28.4608	-31.0092
3.73089	-28.6137	-31.1927
3.77255	-28.787	-31.3558
3.81422	-28.9806	-31.5392
3.85589	-29.2049	-31.7533
3.89755	-29.3884	-31.947
3.93922	-29.5413	-32.1101
3.98783	-29.7044	-32.2426
4.0295	-29.9083	-32.4669
4.07117	-30.0917	-32.6504
4.11283	-30.2956	-32.8338
4.1545	-30.5301	-33.0989
4.19617	-30.7034	-33.2722
4.23783	-30.9276	-33.4964
4.2795	-31.1417	-33.7003
4.32117	-31.3354	-33.894
4.36283	-31.4985	-34.0571
4.4045	-31.682	-34.21
4.44617	-31.8552	-34.4139
4.48783	-32.0489	-34.6075
4.5295	-32.2324	-34.791
4.57117	-32.4771	-35.0051
4.61283	-32.63	-35.1886
4.6545	-32.8338	-35.3721
4.69617	-32.9766	-35.5046
4.73783	-33.2008	-35.7594
4.7795	-33.3741	-35.9633
4.82117	-33.3843	-35.9123
4.86283	-33.5576	-36.1366
4.9045	-33.9246	-36.5036
4.94617	-34.2508	-36.8196
4.98783	-34.5872	-37.156
5.0295	-34.9439	-37.5127
5.07117	-35.2294	-37.7982
5.11283	-35.5657	-38.1346
5.1545	-35.8614	-38.4302
5.19617	-36.1162	-38.6646
5.23783	-36.4118	-38.9501
5.2795	-36.6565	-39.2049
5.32117	-36.9317	-39.4699
5.36283	-37.2681	-39.7859
5.4045	-37.5739	-40.0714
5.44617	-37.8389	-40.3874
5.48783	-38.1244	-40.6728
5.5295	-38.42	-40.9786
5.57117	-38.7462	-41.2538
5.61283	-38.8175	-41.3761
5.6545	-39.0214	-41.5902
5.69617	-39.317	-41.8858
5.73783	-39.5923	-42.1509
5.7795	-39.7554	-42.3242
5.82117	-40.1121	-42.6707
5.86283	-40.4281	-42.9562
5.9045	-40.7034	-43.2722
5.94617	-41.0398	-43.5984
5.98783	-41.3761	-43.9348
6.0295	-41.58	-44.1081
6.07117	-42.0183	-44.5872
6.11283	-42.3751	-44.9032
6.1545	-42.8644	-45.4027
6.19617	-43.3028	-45.841
6.23783	-43.6901	-46.2385
6.2795	-44.0979	-46.6157
6.32117	-44.475	-47.0234
6.36283	-44.8828	-47.4312
6.4045	-45.2905	-47.8389
6.44617	-45.6983	-48.2467
6.48783	-46.0754	-48.6239
6.5295	-46.5138	-49.0826
6.57117	-46.9317	-49.4903
6.61283	-47.3089	-49.8777
6.6545	-47.7574	-50.2752
6.69617	-48.1651	-50.683
6.73783	-48.0632	-50.6422
6.7795	-48.8073	-51.3252
6.82117	-49.2559	-51.8043
6.86283	-49.684	-52.2426
6.9045	-50.1325	-52.6911
6.94617	-50.581	-53.16
6.98783	-51.0296	-53.5882
7.0295	-51.5698	-54.1284
7.07117	-52.1611	-54.7197
7.11283	-52.7217	-55.2905
7.1545	-53.3129	-55.8818
7.19617	-53.9042	-56.4832
7.23783	-54.4954	-57.0642
7.2795	-55.0968	-57.6555
7.32117	-55.6779	-58.2467
7.36283	-56.3405	-58.8991
7.4045	-56.9215	-59.4903
7.44617	-57.6045	-60.1631
7.48783	-58.2671	-60.8461
7.5295	-58.9297	-61.4883
7.57117	-59.6126	-62.1611
7.61283	-60.2956	-62.8542
7.6545	-60.948	-63.527
7.69617	-61.6718	-64.21
7.73783	-62.3853	-64.9541
7.7795	-63.1295	-65.7085
7.82117	-63.8736	-66.4628
7.86283	-64.2508	-66.8807
7.9045	-65.2599	-67.8797
7.94617	-66.0652	-68.6952
7.98783	-66.9929	-69.6126
8.0295	-67.9103	-70.5301
8.07117	-68.8583	-71.4883
8.11283	-69.8165	-72.4363
8.1545	-70.7849	-73.4251
8.19617	-71.7737	-74.4241
8.23783	-72.8033	-75.4332
8.2795	-73.8124	-76.4526
8.32117	-74.8012	-77.4414
8.36283	-75.8104	-78.4506
8.4045	-76.8298	-79.4801
8.44617	-77.8287	-80.4791
8.48783	-78.8379	-81.4883
8.5295	-79.8981	-82.5688
8.57117	-80.948	-83.6086
8.61283	-82.0489	-84.7197
8.6545	-82.895	-85.5556
8.69617	-83.8532	-86.5851
8.73783	-85.3007	-88.002
8.7795	-86.5851	-89.2864
8.82117	-87.8797	-90.5199
8.86283	-89.1335	-91.8247
8.9045	-90.4587	-93.1498
8.94617	-91.7431	-94.4343
8.98783	-93.0581	-95.7594
9.0295	-94.3935	-97.1152
9.07117	-95.8614	-98.6035
9.11283	-97.2885	-100.041
9.1545	-98.8277	-101.58
9.19617	-100.326	-103.099
9.23783	-101.886	-104.648
9.2795	-103.486	-106.279
9.32117	-105.127	-107.92
9.36283	-106.769	-109.572
9.4045	-108.42	-111.223
9.44617	-110.071	-112.895
9.48783	-111.804	-114.597
9.5295	-113.547	-116.361
9.57117	-115.107	-117.951
9.61978	-116.728	-119.562
9.66144	-118.369	-121.193
9.70311	-119.929	-122.813
9.74478	-121.631	-124.526
9.78644	-123.425	-126.3
9.82811	-125.087	-127.992
9.86978	-126.789	-129.735
9.91144	-128.522	-131.468
9.95311	-129.969	-132.946
9.99478	-131.713	-134.709
10.0364	-133.405	-136.402
10.0781	-135.127	-138.175
10.1198	-136.84	-139.929
10.1614	-138.532	-141.641
10.2031	-140.163	-143.252
10.2448	-141.733	-144.903
10.2864	-143.323	-146.544
10.3281	-144.832	-148.073
10.3698	-146.361	-149.653
10.4114	-147.839	-151.193
10.4531	-149.297	-152.681
10.4948	-150.734	-154.149
10.5364	-152.141	-155.607
10.5781	-153.507	-157.034
10.6198	-154.75	-158.43
10.6614	-156.106	-159.827
10.7031	-157.421	-161.223
10.7448	-158.736	-162.599
10.7864	-160.061	-163.986
10.8281	-161.325	-165.331
10.8698	-162.559	-166.626
10.9114	-163.731	-167.87
10.9531	-164.76	-168.919
10.9948	-166.014	-170.234
11.0364	-167.187	-171.458
11.0781	-168.328	-172.712
11.1198	-169.46	-173.945
11.1614	-170.632	-175.229
11.2031	-171.692	-176.371
11.2448	-172.671	-177.472
11.2864	-173.7	-178.603
11.3281	-174.709	-179.735
11.3698	-175.678	-180.836
11.4114	-176.616	-181.927
11.4531	-177.533	-183.007
11.4948	-178.451	-184.108
11.5364	-179.368	-185.209
11.5781	-180.133	-186.198
11.6198	-180.683	-186.922
11.6614	-181.713	-188.216
11.7031	-182.508	-189.246
11.7448	-177.513	-186.677
11.7864	-183.7	-191.121
11.8281	-184.73	-192.538
11.8698	-185.668	-193.812
11.9114	-186.595	-195.056
11.9531	-187.482	-196.33
11.9948	-188.318	-197.431
12.0364	-189.195	-198.593
12.0781	-190.041	-199.786
12.1198	-190.887	-200.938
12.1614	-191.672	-202.069
12.2031	-191.295	-203.099
12.2448	-193.211	-204.241
12.2864	-193.986	-205.28
12.3281	-194.74	-206.33
12.3698	-192.345	-207.36
12.4114	-196.167	-208.43
12.4531	-196.901	-209.592
12.4948	-197.706	-210.714
12.5364	-198.43	-211.794
12.5781	-199.123	-212.905
12.6198	-199.48	-213.802
12.6614	-200.255	-214.975
12.7031	-201.009	-216.126
12.7448	-201.753	-217.309
12.7864	-202.446	-218.491
12.8281	-203.17	-219.664
12.8698	-203.863	-220.948
12.9114	-204.648	-222.202
12.9531	-205.403	-223.578
12.9948	-206.147	-224.964
13.0364	-207.125	-225.973
13.0781	-208.44	-227.727
13.1198	-209.307	-229.276
13.1614	-210.143	-230.734
13.2031	-210.856	-232.314
13.2448	-211.845	-233.996
13.2864	-212.701	-235.627
13.3281	-213.517	-237.339
13.3698	-214.393	-239.032
13.4114	-215.28	-240.856
13.4531	-216.177	-242.762
13.4948	-217.074	-244.699
13.5364	-217.941	-246.626
13.5781	-218.716	-248.644
13.6198	-219.572	-250.744
13.6614	-218.726	-250.041
13.7031	-221.213	-254.873
13.7448	-222.192	-257.278
13.7864	-223.058	-259.592
13.8281	-224.016	-261.855
13.8698	-224.924	-264.322
13.9114	-225.933	-266.799
13.9531	-226.891	-269.276
13.9948	-227.89	-272.049
14.0364	-228.981	-274.975
14.0781	-229.592	-276.463
14.1198	-231.284	-280.683
14.1614	-232.61	-283.925
14.2031	-233.812	-287.635
14.2448	-234.995	-291.284
14.2864	-236.126	-294.873
14.3281	-237.441	-298.389
14.3698	-238.736	-301.927
14.4114	-239.98	-305.841
14.4531	-241.376	-309.602
14.4948	-242.762	-313.609
14.5364	-244.179	-317.9
14.5781	-245.739	-322.273
14.6198	-243.609	-319.745
14.6614	-247.166	-328.308
14.7031	-249.766	-334.23
14.7448	-251.723	-339.551
14.7864	-253.313	-344.424
14.8281	-255.097	-349.307
14.8698	-256.575	-353.935
14.9114	-258.359	-358.797
14.9531	-260.082	-363.976
14.9948	-262.008	-369.49
15.0364	-263.731	-374.322
15.0781	-265.494	-379.602
15.1198	-267.441	-385.24
15.1614	-269.439	-391.04
15.2031	-271.366	-396.881
15.2448	-273.67	-403.007
15.2864	-275.923	-408.95
15.3281	-278.359	-415.556
15.3698	-280.979	-422.365
15.4114	-283.639	-429.266
15.4531	-286.269	-436.524
15.4948	-288.95	-443.537
15.5364	-291.927	-451.407
15.5781	-294.862	-459.327
15.6198	-297.564	-467.625
15.6614	-300.703	-476.188
15.7031	-303.914	-485.576
15.7448	-307.523	-495.341
15.7864	-311.009	-505.27
15.8281	-314.771	-515.362
15.8698	-318.349	-526.442
15.9114	-322.61	-537.686
15.9531	-322.569	-549.083
15.9948	-328.919	-560.622
16.0364	-333.904	-573.007
16.0781	-338.716	-586.035
16.1198	-343.252	-599.256
16.1614	-348.634	-613.456
16.2031	-353.415	-627.482
16.2448	-358.665	-642.579
16.2864	-364.343	-659.062
16.3281	-369.735	-675.749
16.3698	-375.902	-693.598
16.4114	-382.008	-711.172
16.4531	-388.522	-731.366
16.4948	-393.986	-751.6
16.5364	-401.162	-772.885
16.5781	-408.644	-795.708
16.6198	-416.412	-819.154
16.6614	-423.894	-845.341
16.7031	-431.448	-871.223
16.7448	-415.556	-868.104
16.7864	-450.387	-926.34
16.8281	-461.743
16.8698	-470.734
16.9114	-480.306
16.9531	-491.855
16.9948	-503.231
17.0364	-515.168
17.0781	-525.8
17.1198	-537.91
17.1614	-551.009
17.2031	-563.293
17.2448	-575.872
17.2864	-589.001
17.3281	-603.191
17.3698	-618.634
17.4114	-634.037
17.4531	-630.449
17.4948	-648.95
17.5364	-673.415
17.5781	-694.659
17.6198	-715.719
17.6614	-735.851
17.7031	-757.982
17.7448	-777.89
17.7864	-796.667
17.8281	-820.54
17.9114	-862.997
17.9531	-906.239
17.9948	-938.563
18.0364	-969.99
18.0781	-999.511
18.1198	-1029.7
18.1614	-1059.5

## Sheet: HYDRUS
Data für die Zielfunktion: 2 x Tensionen, 1 x Endwassergehalt					Verdunstungsrate
Time	Obs	Type	Pos	Weight	Zeitintervall		Evarate [cm/d]			Type	1-Tension	2-Wassergehalt
0.00342918	-4.42406	1	2	1	0.742269	0	0.373247			Pos	1-top	2-bot	(von oben nach unten)
0.0159292	-4.96432	1	2	1	1.07145	0	0.389694			34	Time-Variable boundary conditions+
0.0450958	-6.02446	1	2	1	1.63882	0	0.368032			22.763	Final Time	Time Information
0.0867625	-7.30887	1	2	1	1.98383	0	0.322512			872	Number of Data Points in Objective Function
0.11454	-7.9103	1	2	1	2.21317	0	0.310942		Interpolated Values	-5.19535	BC-top	[hPa]
0.628429	-9.05199	1	2	1	2.74391	0	0.317759			-3.94535	MP_top_ini	[hPa]	1
0.670096	-9.62283	1	2	1	2.97888	0	0.330534			-0.940528	MP_bot_ini	[hPa]	2
0.711763	-10.1835	1	2	1	3.63888	0	0.340599			0.309472	BC-bot	[hPa]
0.753429	-10.1733	1	2	1	3.97411	0	0.330088
0.795096	-11.0499	1	2	1	4.6609	0	0.319553
0.836763	-11.6004	1	2	1	5.16344	0	0.340895
0.878429	-12.1305	1	2	1	5.63748	0	0.327669		Real Values	-8.13073	BC-top	[cm]
0.92704	-12.3242	1	2	1	6.08197	0	0.308421			-6.88073	MP_top_ini	[cm]
0.982596	-13.0377	1	2	1	6.73574	0	0.300588			-4.34251	MP_bot_ini	[cm]
1.02426	-13.5678	1	2	1	7.85641	0	0.265502			-3.09251	BC-bot	[cm]
1.06593	-14.1182	1	2	1	8.62399	0	0.262161
1.1076	-14.526	1	2	1	9.59918	0	0.268549
1.14926	-15.0663	1	2	1	9.93323	0	0.241079
1.19093	-15.5148	1	2	1	10.5868	0	0.239213
1.2326	-16.0041	1	2	1	10.943	0	0.24567
1.27426	-16.4118	1	2	1	11.5978	0	0.23753
1.31593	-16.84	1	2	1	11.9719	0	0.26458
1.3576	-17.3191	1	2	1	12.5913	0	0.249454
1.39926	-17.7166	1	2	1	13.0179	0	0.235336
1.44093	-18.0836	1	2	1	13.6544	0	0.208941
1.4826	-18.4811	1	2	1	14.0496	0	0.174254
1.52426	-18.6748	1	2	1	14.6135	0	0.149718
1.56593	-19.052	1	2	1	16.7387	0	0.110401
1.6076	-19.2661	1	2	1	17.8592	0	0.085228
1.64926	-19.3782	1	2	1	18.7491	0	0.0755262
1.69093	-19.7248	1	2	1	19.0035	0	0.06927
1.7326	-20	1	2	1	19.6504	0	0.0693727
1.77426	-20.3466	1	2	1	20.65	0	0.0619082
1.79547	-20.4383	1	2	1	22.763	0	0.0486044
1.79964	-20.4791	1	2	1
1.8038	-20.5199	1	2	1
1.80797	-20.5607	1	2	1
1.81214	-20.581	1	2	1
1.8163	-20.6014	1	2	1
1.82047	-20.6524	1	2	1
1.82464	-20.683	1	2	1
1.8288	-20.6932	1	2	1
1.83297	-20.7441	1	2	1
1.85589	-20.8665	1	2	1
1.89755	-21.1111	1	2	1
1.93922	-21.4067	1	2	1
1.98089	-21.6412	1	2	1
2.02255	-21.7737	1	2	1
2.06422	-22.0387	1	2	1
2.10589	-22.3038	1	2	1
2.14755	-22.5382	1	2	1
2.18922	-22.7523	1	2	1
2.23089	-22.8542	1	2	1
2.27255	-23.0887	1	2	1
2.31422	-23.0581	1	2	1
2.35589	-23.3028	1	2	1
2.39755	-23.5168	1	2	1
2.43922	-23.6901	1	2	1
2.48089	-23.894	1	2	1
2.52255	-24.0571	1	2	1
2.56422	-24.1794	1	2	1
2.60589	-24.4444	1	2	1
2.64755	-24.5464	1	2	1
2.68922	-24.5566	1	2	1
2.73089	-24.5056	1	2	1
2.77255	-24.7197	1	2	1
2.81422	-24.7706	1	2	1
2.85589	-24.9949	1	2	1
2.89755	-25.1886	1	2	1
2.93922	-25.423	1	2	1
2.98089	-23.9348	1	2	1
3.02255	-25.2294	1	2	1
3.06422	-25.474	1	2	1
3.10589	-25.79	1	2	1
3.14755	-26.0041	1	2	1
3.18922	-26.2691	1	2	1
3.23089	-26.4832	1	2	1
3.27255	-26.6769	1	2	1
3.31422	-26.84	1	2	1
3.35589	-27.1152	1	2	1
3.39755	-27.3089	1	2	1
3.43922	-27.4924	1	2	1
3.48089	-27.6351	1	2	1
3.52255	-27.8287	1	2	1
3.56422	-27.9918	1	2	1
3.60589	-28.1957	1	2	1
3.64755	-28.0734	1	2	1
3.68922	-28.4608	1	2	1
3.73089	-28.6137	1	2	1
3.77255	-28.787	1	2	1
3.81422	-28.9806	1	2	1
3.85589	-29.2049	1	2	1
3.89755	-29.3884	1	2	1
3.93922	-29.5413	1	2	1
3.98783	-29.7044	1	2	1
4.0295	-29.9083	1	2	1
4.07117	-30.0917	1	2	1
4.11283	-30.2956	1	2	1
4.1545	-30.5301	1	2	1
4.19617	-30.7034	1	2	1
4.23783	-30.9276	1	2	1
4.2795	-31.1417	1	2	1
4.32117	-31.3354	1	2	1
4.36283	-31.4985	1	2	1
4.4045	-31.682	1	2	1
4.44617	-31.8552	1	2	1
4.48783	-32.0489	1	2	1
4.5295	-32.2324	1	2	1
4.57117	-32.4771	1	2	1
4.61283	-32.63	1	2	1
4.6545	-32.8338	1	2	1
4.69617	-32.9766	1	2	1
4.73783	-33.2008	1	2	1
4.7795	-33.3741	1	2	1
4.82117	-33.3843	1	2	1
4.86283	-33.5576	1	2	1
4.9045	-33.9246	1	2	1
4.94617	-34.2508	1	2	1
4.98783	-34.5872	1	2	1
5.0295	-34.9439	1	2	1
5.07117	-35.2294	1	2	1
5.11283	-35.5657	1	2	1
5.1545	-35.8614	1	2	1
5.19617	-36.1162	1	2	1
5.23783	-36.4118	1	2	1
5.2795	-36.6565	1	2	1
5.32117	-36.9317	1	2	1
5.36283	-37.2681	1	2	1
5.4045	-37.5739	1	2	1
5.44617	-37.8389	1	2	1
5.48783	-38.1244	1	2	1
5.5295	-38.42	1	2	1
5.57117	-38.7462	1	2	1
5.61283	-38.8175	1	2	1
5.6545	-39.0214	1	2	1
5.69617	-39.317	1	2	1
5.73783	-39.5923	1	2	1
5.7795	-39.7554	1	2	1
5.82117	-40.1121	1	2	1
5.86283	-40.4281	1	2	1
5.9045	-40.7034	1	2	1
5.94617	-41.0398	1	2	1
5.98783	-41.3761	1	2	1
6.0295	-41.58	1	2	1
6.07117	-42.0183	1	2	1
6.11283	-42.3751	1	2	1
6.1545	-42.8644	1	2	1
6.19617	-43.3028	1	2	1
6.23783	-43.6901	1	2	1
6.2795	-44.0979	1	2	1
6.32117	-44.475	1	2	1
6.36283	-44.8828	1	2	1
6.4045	-45.2905	1	2	1
6.44617	-45.6983	1	2	1
6.48783	-46.0754	1	2	1
6.5295	-46.5138	1	2	1
6.57117	-46.9317	1	2	1
6.61283	-47.3089	1	2	1
6.6545	-47.7574	1	2	1
6.69617	-48.1651	1	2	1
6.73783	-48.0632	1	2	1
6.7795	-48.8073	1	2	1
6.82117	-49.2559	1	2	1
6.86283	-49.684	1	2	1
6.9045	-50.1325	1	2	1
6.94617	-50.581	1	2	1
6.98783	-51.0296	1	2	1
7.0295	-51.5698	1	2	1
7.07117	-52.1611	1	2	1
7.11283	-52.7217	1	2	1
7.1545	-53.3129	1	2	1
7.19617	-53.9042	1	2	1
7.23783	-54.4954	1	2	1
7.2795	-55.0968	1	2	1
7.32117	-55.6779	1	2	1
7.36283	-56.3405	1	2	1
7.4045	-56.9215	1	2	1
7.44617	-57.6045	1	2	1
7.48783	-58.2671	1	2	1
7.5295	-58.9297	1	2	1
7.57117	-59.6126	1	2	1
7.61283	-60.2956	1	2	1
7.6545	-60.948	1	2	1
7.69617	-61.6718	1	2	1
7.73783	-62.3853	1	2	1
7.7795	-63.1295	1	2	1
7.82117	-63.8736	1	2	1
7.86283	-64.2508	1	2	1
7.9045	-65.2599	1	2	1
7.94617	-66.0652	1	2	1
7.98783	-66.9929	1	2	1
8.0295	-67.9103	1	2	1
8.07117	-68.8583	1	2	1
8.11283	-69.8165	1	2	1
8.1545	-70.7849	1	2	1
8.19617	-71.7737	1	2	1
8.23783	-72.8033	1	2	1
8.2795	-73.8124	1	2	1
8.32117	-74.8012	1	2	1
8.36283	-75.8104	1	2	1
8.4045	-76.8298	1	2	1
8.44617	-77.8287	1	2	1
8.48783	-78.8379	1	2	1
8.5295	-79.8981	1	2	1
8.57117	-80.948	1	2	1
8.61283	-82.0489	1	2	1
8.6545	-82.895	1	2	1
8.69617	-83.8532	1	2	1
8.73783	-85.3007	1	2	1
8.7795	-86.5851	1	2	1
8.82117	-87.8797	1	2	1
8.86283	-89.1335	1	2	1
8.9045	-90.4587	1	2	1
8.94617	-91.7431	1	2	1
8.98783	-93.0581	1	2	1
9.0295	-94.3935	1	2	1
9.07117	-95.8614	1	2	1
9.11283	-97.2885	1	2	1
9.1545	-98.8277	1	2	1
9.19617	-100.326	1	2	1
9.23783	-101.886	1	2	1
9.2795	-103.486	1	2	1
9.32117	-105.127	1	2	1
9.36283	-106.769	1	2	1
9.4045	-108.42	1	2	1
9.44617	-110.071	1	2	1
9.48783	-111.804	1	2	1
9.5295	-113.547	1	2	1
9.57117	-115.107	1	2	1
9.61978	-116.728	1	2	1
9.66144	-118.369	1	2	1
9.70311	-119.929	1	2	1
9.74478	-121.631	1	2	1
9.78644	-123.425	1	2	1
9.82811	-125.087	1	2	1
9.86978	-126.789	1	2	1
9.91144	-128.522	1	2	1
9.95311	-129.969	1	2	1
9.99478	-131.713	1	2	1
10.0364	-133.405	1	2	1
10.0781	-135.127	1	2	1
10.1198	-136.84	1	2	1
10.1614	-138.532	1	2	1
10.2031	-140.163	1	2	1
10.2448	-141.733	1	2	1
10.2864	-143.323	1	2	1
10.3281	-144.832	1	2	1
10.3698	-146.361	1	2	1
10.4114	-147.839	1	2	1
10.4531	-149.297	1	2	1
10.4948	-150.734	1	2	1
10.5364	-152.141	1	2	1
10.5781	-153.507	1	2	1
10.6198	-154.75	1	2	1
10.6614	-156.106	1	2	1
10.7031	-157.421	1	2	1
10.7448	-158.736	1	2	1
10.7864	-160.061	1	2	1
10.8281	-161.325	1	2	1
10.8698	-162.559	1	2	1
10.9114	-163.731	1	2	1
10.9531	-164.76	1	2	1
10.9948	-166.014	1	2	1
11.0364	-167.187	1	2	1
11.0781	-168.328	1	2	1
11.1198	-169.46	1	2	1
11.1614	-170.632	1	2	1
11.2031	-171.692	1	2	1
11.2448	-172.671	1	2	1
11.2864	-173.7	1	2	1
11.3281	-174.709	1	2	1
11.3698	-175.678	1	2	1
11.4114	-176.616	1	2	1
11.4531	-177.533	1	2	1
11.4948	-178.451	1	2	1
11.5364	-179.368	1	2	1
11.5781	-180.133	1	2	1
11.6198	-180.683	1	2	1
11.6614	-181.713	1	2	1
11.7031	-182.508	1	2	1
11.7448	-177.513	1	2	1
11.7864	-183.7	1	2	1
11.8281	-184.73	1	2	1
11.8698	-185.668	1	2	1
11.9114	-186.595	1	2	1
11.9531	-187.482	1	2	1
11.9948	-188.318	1	2	1
12.0364	-189.195	1	2	1
12.0781	-190.041	1	2	1
12.1198	-190.887	1	2	1
12.1614	-191.672	1	2	1
12.2031	-191.295	1	2	1
12.2448	-193.211	1	2	1
12.2864	-193.986	1	2	1
12.3281	-194.74	1	2	1
12.3698	-192.345	1	2	1
12.4114	-196.167	1	2	1
12.4531	-196.901	1	2	1
12.4948	-197.706	1	2	1
12.5364	-198.43	1	2	1
12.5781	-199.123	1	2	1
12.6198	-199.48	1	2	1
12.6614	-200.255	1	2	1
12.7031	-201.009	1	2	1
12.7448	-201.753	1	2	1
12.7864	-202.446	1	2	1
12.8281	-203.17	1	2	1
12.8698	-203.863	1	2	1
12.9114	-204.648	1	2	1
12.9531	-205.403	1	2	1
12.9948	-206.147	1	2	1
13.0364	-207.125	1	2	1
13.0781	-208.44	1	2	1
13.1198	-209.307	1	2	1
13.1614	-210.143	1	2	1
13.2031	-210.856	1	2	1
13.2448	-211.845	1	2	1
13.2864	-212.701	1	2	1
13.3281	-213.517	1	2	1
13.3698	-214.393	1	2	1
13.4114	-215.28	1	2	1
13.4531	-216.177	1	2	1
13.4948	-217.074	1	2	1
13.5364	-217.941	1	2	1
13.5781	-218.716	1	2	1
13.6198	-219.572	1	2	1
13.6614	-218.726	1	2	1
13.7031	-221.213	1	2	1
13.7448	-222.192	1	2	1
13.7864	-223.058	1	2	1
13.8281	-224.016	1	2	1
13.8698	-224.924	1	2	1
13.9114	-225.933	1	2	1
13.9531	-226.891	1	2	1
13.9948	-227.89	1	2	1
14.0364	-228.981	1	2	1
14.0781	-229.592	1	2	1
14.1198	-231.284	1	2	1
14.1614	-232.61	1	2	1
14.2031	-233.812	1	2	1
14.2448	-234.995	1	2	1
14.2864	-236.126	1	2	1
14.3281	-237.441	1	2	1
14.3698	-238.736	1	2	1
14.4114	-239.98	1	2	1
14.4531	-241.376	1	2	1
14.4948	-242.762	1	2	1
14.5364	-244.179	1	2	1
14.5781	-245.739	1	2	1
14.6198	-243.609	1	2	1
14.6614	-247.166	1	2	1
14.7031	-249.766	1	2	1
14.7448	-251.723	1	2	1
14.7864	-253.313	1	2	1
14.8281	-255.097	1	2	1
14.8698	-256.575	1	2	1
14.9114	-258.359	1	2	1
14.9531	-260.082	1	2	1
14.9948	-262.008	1	2	1
15.0364	-263.731	1	2	1
15.0781	-265.494	1	2	1
15.1198	-267.441	1	2	1
15.1614	-269.439	1	2	1
15.2031	-271.366	1	2	1
15.2448	-273.67	1	2	1
15.2864	-275.923	1	2	1
15.3281	-278.359	1	2	1
15.3698	-280.979	1	2	1
15.4114	-283.639	1	2	1
15.4531	-286.269	1	2	1
15.4948	-288.95	1	2	1
15.5364	-291.927	1	2	1
15.5781	-294.862	1	2	1
15.6198	-297.564	1	2	1
15.6614	-300.703	1	2	1
15.7031	-303.914	1	2	1
15.7448	-307.523	1	2	1
15.7864	-311.009	1	2	1
15.8281	-314.771	1	2	1
15.8698	-318.349	1	2	1
15.9114	-322.61	1	2	1
15.9531	-322.569	1	2	1
15.9948	-328.919	1	2	1
16.0364	-333.904	1	2	1
16.0781	-338.716	1	2	1
16.1198	-343.252	1	2	1
16.1614	-348.634	1	2	1
16.2031	-353.415	1	2	1
16.2448	-358.665	1	2	1
16.2864	-364.343	1	2	1
16.3281	-369.735	1	2	1
16.3698	-375.902	1	2	1
16.4114	-382.008	1	2	1
16.4531	-388.522	1	2	1
16.4948	-393.986	1	2	1
16.5364	-401.162	1	2	1
16.5781	-408.644	1	2	1
16.6198	-416.412	1	2	1
16.6614	-423.894	1	2	1
16.7031	-431.448	1	2	1
16.7448	-415.556	1	2	1
16.7864	-450.387	1	2	1
16.8281	-461.743	1	2	1
16.8698	-470.734	1	2	1
16.9114	-480.306	1	2	1
16.9531	-491.855	1	2	1
16.9948	-503.231	1	2	1
17.0364	-515.168	1	2	1
17.0781	-525.8	1	2	1
17.1198	-537.91	1	2	1
17.1614	-551.009	1	2	1
17.2031	-563.293	1	2	1
17.2448	-575.872	1	2	1
17.2864	-589.001	1	2	1
17.3281	-603.191	1	2	1
17.3698	-618.634	1	2	1
17.4114	-634.037	1	2	1
17.4531	-630.449	1	2	1
17.4948	-648.95	1	2	1
17.5364	-673.415	1	2	1
17.5781	-694.659	1	2	1
17.6198	-715.719	1	2	1
17.6614	-735.851	1	2	1
17.7031	-757.982	1	2	1
17.7448	-777.89	1	2	1
17.7864	-796.667	1	2	1
17.8281	-820.54	1	2	1
17.9114	-862.997	1	2	1
17.9531	-906.239	1	2	1
17.9948	-938.563	1	2	1
18.0364	-969.99	1	2	1
18.0781	-999.511	1	2	1
18.1198	-1029.7	1	2	1
18.1614	-1059.5	1	2	1
22.5017	-8970.44	1	2	1
0.00342918	-6.9317	1	1	1
0.0159292	-7.51274	1	1	1
0.0450958	-8.58308	1	1	1
0.0867625	-9.85729	1	1	1
0.11454	-10.4485	1	1	1
0.628429	-11.6208	1	1	1
0.670096	-12.1611	1	1	1
0.711763	-12.7727	1	1	1
0.753429	-12.7829	1	1	1
0.795096	-13.6493	1	1	1
0.836763	-14.1998	1	1	1
0.878429	-14.7503	1	1	1
0.92704	-14.893	1	1	1
0.982596	-15.5963	1	1	1
1.02426	-16.1672	1	1	1
1.06593	-16.7176	1	1	1
1.1076	-17.105	1	1	1
1.14926	-17.6453	1	1	1
1.19093	-18.0938	1	1	1
1.2326	-18.6035	1	1	1
1.27426	-18.9908	1	1	1
1.31593	-19.3986	1	1	1
1.3576	-19.9083	1	1	1
1.39926	-20.265	1	1	1
1.44093	-20.6932	1	1	1
1.4826	-21.0907	1	1	1
1.52426	-21.2436	1	1	1
1.56593	-21.6412	1	1	1
1.6076	-21.8654	1	1	1
1.64926	-21.9572	1	1	1
1.69093	-22.3038	1	1	1
1.7326	-22.579	1	1	1
1.77426	-22.8848	1	1	1
1.79547	-23.0173	1	1	1
1.79964	-23.0479	1	1	1
1.8038	-23.0887	1	1	1
1.80797	-23.1397	1	1	1
1.81214	-23.1498	1	1	1
1.8163	-23.1906	1	1	1
1.82047	-23.2212	1	1	1
1.82464	-23.262	1	1	1
1.8288	-23.262	1	1	1
1.83297	-23.3129	1	1	1
1.85589	-23.4149	1	1	1
1.89755	-23.6391	1	1	1
1.93922	-23.9755	1	1	1
1.98089	-24.2202	1	1	1
2.02255	-24.3119	1	1	1
2.06422	-24.6075	1	1	1
2.10589	-24.8726	1	1	1
2.14755	-25.1172	1	1	1
2.18922	-25.3211	1	1	1
2.23089	-25.4434	1	1	1
2.27255	-25.6779	1	1	1
2.31422	-25.6371	1	1	1
2.35589	-25.8919	1	1	1
2.39755	-26.106	1	1	1
2.43922	-26.2691	1	1	1
2.48089	-26.473	1	1	1
2.52255	-26.6463	1	1	1
2.56422	-26.7686	1	1	1
2.60589	-27.0336	1	1	1
2.64755	-27.1152	1	1	1
2.68922	-27.1356	1	1	1
2.73089	-27.0744	1	1	1
2.77255	-27.2783	1	1	1
2.81422	-27.3496	1	1	1
2.85589	-27.5229	1	1	1
2.89755	-27.7166	1	1	1
2.93922	-27.9817	1	1	1
2.98089	-26.524	1	1	1
3.02255	-27.7982	1	1	1
3.06422	-28.053	1	1	1
3.10589	-28.3588	1	1	1
3.14755	-28.5729	1	1	1
3.18922	-28.8379	1	1	1
3.23089	-29.0316	1	1	1
3.27255	-29.2457	1	1	1
3.31422	-29.419	1	1	1
3.35589	-29.6738	1	1	1
3.39755	-29.8879	1	1	1
3.43922	-30.0612	1	1	1
3.48089	-30.1937	1	1	1
3.52255	-30.3976	1	1	1
3.56422	-30.5708	1	1	1
3.60589	-30.7543	1	1	1
3.64755	-30.632	1	1	1
3.68922	-31.0092	1	1	1
3.73089	-31.1927	1	1	1
3.77255	-31.3558	1	1	1
3.81422	-31.5392	1	1	1
3.85589	-31.7533	1	1	1
3.89755	-31.947	1	1	1
3.93922	-32.1101	1	1	1
3.98783	-32.2426	1	1	1
4.0295	-32.4669	1	1	1
4.07117	-32.6504	1	1	1
4.11283	-32.8338	1	1	1
4.1545	-33.0989	1	1	1
4.19617	-33.2722	1	1	1
4.23783	-33.4964	1	1	1
4.2795	-33.7003	1	1	1
4.32117	-33.894	1	1	1
4.36283	-34.0571	1	1	1
4.4045	-34.21	1	1	1
4.44617	-34.4139	1	1	1
4.48783	-34.6075	1	1	1
4.5295	-34.791	1	1	1
4.57117	-35.0051	1	1	1
4.61283	-35.1886	1	1	1
4.6545	-35.3721	1	1	1
4.69617	-35.5046	1	1	1
4.73783	-35.7594	1	1	1
4.7795	-35.9633	1	1	1
4.82117	-35.9123	1	1	1
4.86283	-36.1366	1	1	1
4.9045	-36.5036	1	1	1
4.94617	-36.8196	1	1	1
4.98783	-37.156	1	1	1
5.0295	-37.5127	1	1	1
5.07117	-37.7982	1	1	1
5.11283	-38.1346	1	1	1
5.1545	-38.4302	1	1	1
5.19617	-38.6646	1	1	1
5.23783	-38.9501	1	1	1
5.2795	-39.2049	1	1	1
5.32117	-39.4699	1	1	1
5.36283	-39.7859	1	1	1
5.4045	-40.0714	1	1	1
5.44617	-40.3874	1	1	1
5.48783	-40.6728	1	1	1
5.5295	-40.9786	1	1	1
5.57117	-41.2538	1	1	1
5.61283	-41.3761	1	1	1
5.6545	-41.5902	1	1	1
5.69617	-41.8858	1	1	1
5.73783	-42.1509	1	1	1
5.7795	-42.3242	1	1	1
5.82117	-42.6707	1	1	1
5.86283	-42.9562	1	1	1
5.9045	-43.2722	1	1	1
5.94617	-43.5984	1	1	1
5.98783	-43.9348	1	1	1
6.0295	-44.1081	1	1	1
6.07117	-44.5872	1	1	1
6.11283	-44.9032	1	1	1
6.1545	-45.4027	1	1	1
6.19617	-45.841	1	1	1
6.23783	-46.2385	1	1	1
6.2795	-46.6157	1	1	1
6.32117	-47.0234	1	1	1
6.36283	-47.4312	1	1	1
6.4045	-47.8389	1	1	1
6.44617	-48.2467	1	1	1
6.48783	-48.6239	1	1	1
6.5295	-49.0826	1	1	1
6.57117	-49.4903	1	1	1
6.61283	-49.8777	1	1	1
6.6545	-50.2752	1	1	1
6.69617	-50.683	1	1	1
6.73783	-50.6422	1	1	1
6.7795	-51.3252	1	1	1
6.82117	-51.8043	1	1	1
6.86283	-52.2426	1	1	1
6.9045	-52.6911	1	1	1
6.94617	-53.16	1	1	1
6.98783	-53.5882	1	1	1
7.0295	-54.1284	1	1	1
7.07117	-54.7197	1	1	1
7.11283	-55.2905	1	1	1
7.1545	-55.8818	1	1	1
7.19617	-56.4832	1	1	1
7.23783	-57.0642	1	1	1
7.2795	-57.6555	1	1	1
7.32117	-58.2467	1	1	1
7.36283	-58.8991	1	1	1
7.4045	-59.4903	1	1	1
7.44617	-60.1631	1	1	1
7.48783	-60.8461	1	1	1
7.5295	-61.4883	1	1	1
7.57117	-62.1611	1	1	1
7.61283	-62.8542	1	1	1
7.6545	-63.527	1	1	1
7.69617	-64.21	1	1	1
7.73783	-64.9541	1	1	1
7.7795	-65.7085	1	1	1
7.82117	-66.4628	1	1	1
7.86283	-66.8807	1	1	1
7.9045	-67.8797	1	1	1
7.94617	-68.6952	1	1	1
7.98783	-69.6126	1	1	1
8.0295	-70.5301	1	1	1
8.07117	-71.4883	1	1	1
8.11283	-72.4363	1	1	1
8.1545	-73.4251	1	1	1
8.19617	-74.4241	1	1	1
8.23783	-75.4332	1	1	1
8.2795	-76.4526	1	1	1
8.32117	-77.4414	1	1	1
8.36283	-78.4506	1	1	1
8.4045	-79.4801	1	1	1
8.44617	-80.4791	1	1	1
8.48783	-81.4883	1	1	1
8.5295	-82.5688	1	1	1
8.57117	-83.6086	1	1	1
8.61283	-84.7197	1	1	1
8.6545	-85.5556	1	1	1
8.69617	-86.5851	1	1	1
8.73783	-88.002	1	1	1
8.7795	-89.2864	1	1	1
8.82117	-90.5199	1	1	1
8.86283	-91.8247	1	1	1
8.9045	-93.1498	1	1	1
8.94617	-94.4343	1	1	1
8.98783	-95.7594	1	1	1
9.0295	-97.1152	1	1	1
9.07117	-98.6035	1	1	1
9.11283	-100.041	1	1	1
9.1545	-101.58	1	1	1
9.19617	-103.099	1	1	1
9.23783	-104.648	1	1	1
9.2795	-106.279	1	1	1
9.32117	-107.92	1	1	1
9.36283	-109.572	1	1	1
9.4045	-111.223	1	1	1
9.44617	-112.895	1	1	1
9.48783	-114.597	1	1	1
9.5295	-116.361	1	1	1
9.57117	-117.951	1	1	1
9.61978	-119.562	1	1	1
9.66144	-121.193	1	1	1
9.70311	-122.813	1	1	1
9.74478	-124.526	1	1	1
9.78644	-126.3	1	1	1
9.82811	-127.992	1	1	1
9.86978	-129.735	1	1	1
9.91144	-131.468	1	1	1
9.95311	-132.946	1	1	1
9.99478	-134.709	1	1	1
10.0364	-136.402	1	1	1
10.0781	-138.175	1	1	1
10.1198	-139.929	1	1	1
10.1614	-141.641	1	1	1
10.2031	-143.252	1	1	1
10.2448	-144.903	1	1	1
10.2864	-146.544	1	1	1
10.3281	-148.073	1	1	1
10.3698	-149.653	1	1	1
10.4114	-151.193	1	1	1
10.4531	-152.681	1	1	1
10.4948	-154.149	1	1	1
10.5364	-155.607	1	1	1
10.5781	-157.034	1	1	1
10.6198	-158.43	1	1	1
10.6614	-159.827	1	1	1
10.7031	-161.223	1	1	1
10.7448	-162.599	1	1	1
10.7864	-163.986	1	1	1
10.8281	-165.331	1	1	1
10.8698	-166.626	1	1	1
10.9114	-167.87	1	1	1
10.9531	-168.919	1	1	1
10.9948	-170.234	1	1	1
11.0364	-171.458	1	1	1
11.0781	-172.712	1	1	1
11.1198	-173.945	1	1	1
11.1614	-175.229	1	1	1
11.2031	-176.371	1	1	1
11.2448	-177.472	1	1	1
11.2864	-178.603	1	1	1
11.3281	-179.735	1	1	1
11.3698	-180.836	1	1	1
11.4114	-181.927	1	1	1
11.4531	-183.007	1	1	1
11.4948	-184.108	1	1	1
11.5364	-185.209	1	1	1
11.5781	-186.198	1	1	1
11.6198	-186.922	1	1	1
11.6614	-188.216	1	1	1
11.7031	-189.246	1	1	1
11.7448	-186.677	1	1	1
11.7864	-191.121	1	1	1
11.8281	-192.538	1	1	1
11.8698	-193.812	1	1	1
11.9114	-195.056	1	1	1
11.9531	-196.33	1	1	1
11.9948	-197.431	1	1	1
12.0364	-198.593	1	1	1
12.0781	-199.786	1	1	1
12.1198	-200.938	1	1	1
12.1614	-202.069	1	1	1
12.2031	-203.099	1	1	1
12.2448	-204.241	1	1	1
12.2864	-205.28	1	1	1
12.3281	-206.33	1	1	1
12.3698	-207.36	1	1	1
12.4114	-208.43	1	1	1
12.4531	-209.592	1	1	1
12.4948	-210.714	1	1	1
12.5364	-211.794	1	1	1
12.5781	-212.905	1	1	1
12.6198	-213.802	1	1	1
12.6614	-214.975	1	1	1
12.7031	-216.126	1	1	1
12.7448	-217.309	1	1	1
12.7864	-218.491	1	1	1
12.8281	-219.664	1	1	1
12.8698	-220.948	1	1	1
12.9114	-222.202	1	1	1
12.9531	-223.578	1	1	1
12.9948	-224.964	1	1	1
13.0364	-225.973	1	1	1
13.0781	-227.727	1	1	1
13.1198	-229.276	1	1	1
13.1614	-230.734	1	1	1
13.2031	-232.314	1	1	1
13.2448	-233.996	1	1	1
13.2864	-235.627	1	1	1
13.3281	-237.339	1	1	1
13.3698	-239.032	1	1	1
13.4114	-240.856	1	1	1
13.4531	-242.762	1	1	1
13.4948	-244.699	1	1	1
13.5364	-246.626	1	1	1
13.5781	-248.644	1	1	1
13.6198	-250.744	1	1	1
13.6614	-250.041	1	1	1
13.7031	-254.873	1	1	1
13.7448	-257.278	1	1	1
13.7864	-259.592	1	1	1
13.8281	-261.855	1	1	1
13.8698	-264.322	1	1	1
13.9114	-266.799	1	1	1
13.9531	-269.276	1	1	1
13.9948	-272.049	1	1	1
14.0364	-274.975	1	1	1
14.0781	-276.463	1	1	1
14.1198	-280.683	1	1	1
14.1614	-283.925	1	1	1
14.2031	-287.635	1	1	1
14.2448	-291.284	1	1	1
14.2864	-294.873	1	1	1
14.3281	-298.389	1	1	1
14.3698	-301.927	1	1	1
14.4114	-305.841	1	1	1
14.4531	-309.602	1	1	1
14.4948	-313.609	1	1	1
14.5364	-317.9	1	1	1
14.5781	-322.273	1	1	1
14.6198	-319.745	1	1	1
14.6614	-328.308	1	1	1
14.7031	-334.23	1	1	1
14.7448	-339.551	1	1	1
14.7864	-344.424	1	1	1
14.8281	-349.307	1	1	1
14.8698	-353.935	1	1	1
14.9114	-358.797	1	1	1
14.9531	-363.976	1	1	1
14.9948	-369.49	1	1	1
15.0364	-374.322	1	1	1
15.0781	-379.602	1	1	1
15.1198	-385.24	1	1	1
15.1614	-391.04	1	1	1
15.2031	-396.881	1	1	1
15.2448	-403.007	1	1	1
15.2864	-408.95	1	1	1
15.3281	-415.556	1	1	1
15.3698	-422.365	1	1	1
15.4114	-429.266	1	1	1
15.4531	-436.524	1	1	1
15.4948	-443.537	1	1	1
15.5364	-451.407	1	1	1
15.5781	-459.327	1	1	1
15.6198	-467.625	1	1	1
15.6614	-476.188	1	1	1
15.7031	-485.576	1	1	1
15.7448	-495.341	1	1	1
15.7864	-505.27	1	1	1
15.8281	-515.362	1	1	1
15.8698	-526.442	1	1	1
15.9114	-537.686	1	1	1
15.9531	-549.083	1	1	1
15.9948	-560.622	1	1	1
16.0364	-573.007	1	1	1
16.0781	-586.035	1	1	1
16.1198	-599.256	1	1	1
16.1614	-613.456	1	1	1
16.2031	-627.482	1	1	1
16.2448	-642.579	1	1	1
16.2864	-659.062	1	1	1
16.3281	-675.749	1	1	1
16.3698	-693.598	1	1	1
16.4114	-711.172	1	1	1
16.4531	-731.366	1	1	1
16.4948	-751.6	1	1	1
16.5364	-772.885	1	1	1
16.5781	-795.708	1	1	1
16.6198	-819.154	1	1	1
16.6614	-845.341	1	1	1
16.7031	-871.223	1	1	1
16.7448	-868.104	1	1	1
16.7864	-926.34	1	1	1
19.1892	-8970.44	1	1	1
0.742269	0.910533	2	0	100000
1.07145	0.884877	2	0	100000
1.63882	0.843115	2	0	100000
1.98383	0.820861	2	0	100000
2.21317	0.806598	2	0	100000
2.74391	0.772869	2	0	100000
2.97888	0.757336	2	0	100000
3.63888	0.712377	2	0	100000
3.97411	0.690246	2	0	100000
4.6609	0.646352	2	0	100000
5.16344	0.61209	2	0	100000
5.63748	0.581025	2	0	100000
6.08197	0.553607	2	0	100000
6.73574	0.514303	2	0	100000
7.85641	0.454795	2	0	100000
8.62399	0.414549	2	0	100000
9.59918	0.362172	2	0	100000
9.93323	0.346066	2	0	100000
10.5868	0.314795	2	0	100000
10.943	0.297295	2	0	100000
11.5978	0.266189	2	0	100000
11.9719	0.246393	2	0	100000
12.5913	0.215492	2	0	100000
13.0179	0.19541	2	0	100000
13.6544	0.168811	2	0	100000
14.0496	0.155041	2	0	100000
14.6135	0.138156	2	0	100000
16.7387	0.0912295	2	0	100000
17.8592	0.0721311	2	0	100000
18.7491	0.0586885	2	0	100000
19.0035	0.0551639	2	0	100000
19.6504	0.0461885	2	0	100000
20.65	0.0338115	2	0	100000
22.7623	0.0132787	2	0	100000

## Sheet: tens_interpolation
		Datum / Zeit	Tension unten [hPa]	Tension oben [hPa]
m_bot	b_bot	2013-07-31 15:49:15	0.65	3.59
82.8	-3.43509e+06	2013-07-31 16:09:15	1.8	4.76
m_top	b_top	2013-07-31 15:53:59	0.921717	3.86644
84.24	-3.49483e+06	y = m*x+b
		AE unten [t]	AE oben [t]
		41227.2
			Brutto-Gewicht [g]	Netto-Gewicht [g]
-1.40314	58626.9	2013-08-23 17:58:52	382.99	12.72
		2013-08-24 10:54:53	382	11.73
-1.40314	58256.7	2013-08-24 06:49:00	382.24	11.9696
			AE unten
m_bot	b_bot	2012-11-12 09:52:24	595.08	28.48
-3.5343	146298	2012-11-15 10:52:20	584.33	17.73
m_top	b_top	2012-12-31 06:08:40	422.448	-144.152
-3.5343	145731	y = m*x+b
