# Supplementary material for: A pore-size classification for peat bogs derived from unsaturated hydraulic properties
Source: Copernicus journal article supplement (doi:10.5194/hess-21-6185-2017), 2017-12-07
Supplement: Supplementary file 26 [file A334_8_HYDRUS.xlsx]

## Sheet: Gewicht
Datum / Zeit	Brutto-Gewicht [g]	Netto-Gewicht [g]	Gewichtsänderung [g]	Zeit [d]	Theta [-]	Verdunstungsrate [cm/d]		Volumen	244
2012-12-08 18:08:15	616.84	250.54	0					Höhe	5
2012-12-09 11:56:02	601.31	235.01	-15.53	0.741523	0.922623	0.429167		A	48.8
2012-12-09 19:50:03	595.13	228.83	-21.71	1.07069	0.897295	0.384723		Theta0	0.98627
2012-12-10 09:27:05	585.46	219.16	-31.38	1.63809	0.857664	0.349239		Trockengewicht	9.89
2012-12-10 17:43:32	580.89	214.59	-35.95	1.98284	0.838934	0.271633		Ks (as in Ksat)
2012-12-10 23:14:09	577.95	211.65	-38.89	2.21243	0.826885	0.262411		delta System [g]	366.3
2012-12-11 11:58:14	571.17	204.87	-45.67	2.74305	0.799098	0.261832
2012-12-11 17:37:14	568.05	201.75	-48.79	2.97847	0.786311	0.271583
2012-12-12 09:25:23	559.25	192.95	-57.59	3.63691	0.750246	0.273872
2012-12-12 17:27:59	554.81	188.51	-62.03	3.97205	0.732049	0.271479
2012-12-13 09:56:39	546.13	179.83	-70.71	4.65862	0.696475	0.259069
2012-12-13 22:02:10	539.57	173.27	-77.27	5.16245	0.66959	0.266809
2012-12-14 09:24:44	533.47	167.17	-83.37	5.63646	0.64459	0.263707
2012-12-14 20:05:13	527.8	161.5	-89.04	6.08123	0.621352	0.261233
2012-12-15 11:44:47	520.23	153.93	-96.61	6.73371	0.590328	0.237742
2012-12-16 14:38:19	508.22	141.92	-108.62	7.85422	0.541107	0.219638
2012-12-17 09:05:50	499.98	133.68	-116.86	8.62332	0.507336	0.219546
2012-12-18 08:27:53	487.98	121.68	-128.86	9.59697	0.458156	0.252557
2012-12-18 16:31:02	484.27	117.97	-132.57	9.9325	0.442951	0.226581
2012-12-19 08:12:19	476.91	110.61	-139.93	10.5862	0.412787	0.230729
2012-12-19 16:45:04	473.02	106.72	-143.82	10.9422	0.396844	0.223869
2012-12-20 08:28:13	465.94	99.64	-150.9	11.5972	0.367828	0.221508
2012-12-20 17:26:02	461.66	95.36	-155.18	11.9707	0.350287	0.234829
2012-12-21 08:17:59	454.81	88.51	-162.03	12.5901	0.322213	0.226616
2012-12-21 18:27:51	450.16	83.86	-166.68	13.0136	0.303156	0.224994
2012-12-22 09:47:41	442.83	76.53	-174.01	13.6524	0.273115	0.235143
2012-12-22 19:16:34	438.49	72.19	-178.35	14.0474	0.255328	0.22512
2012-12-23 08:50:38	432.39	66.09	-184.45	14.6128	0.230328	0.221109
2012-12-25 11:51:46	411.75	45.45	-205.09	16.7386	0.145738	0.198962
2012-12-26 14:44:40	405.37	39.07	-211.47	17.8586	0.11959	0.116724
2012-12-27 12:05:53	401.14	34.84	-215.7	18.7484	0.102254	0.0974228
2012-12-27 18:10:57	400.04	33.74	-216.8	19.0019	0.0977459	0.0889107
2012-12-28 09:42:12	397.3	31	-219.54	19.6486	0.0865164	0.0868214
2012-12-29 09:17:41	393.58	27.28	-223.26	20.6316	0.0712705	0.0775496
2012-12-31 12:24:48	387.18	20.88	-229.66	22.7615	0.045041	0.0615735

## Sheet: Tensionen
Datum / Zeit	Tension unten [hPa]	Tension oben [hPa]	Zeit [d]	MP bot(2) [cm]	MP top(1) [cm]		WÄGUNG START
2012-12-08 17:51:08	-0.43	2	-0.0118844	0.438328	-2.03874		41251.8	-2.50765
2012-12-08 17:52:08	-0.39	2.04	-0.01119	0.397554	-2.07951		2012-12-08 18:08:15
2012-12-08 17:53:08	-0.37	2.05	-0.0104955	0.377166	-2.0897
2012-12-08 17:54:08	-0.33	2.09	-0.00980107	0.336391	-2.13048
2012-12-08 17:55:08	-0.31	2.12	-0.00910663	0.316004	-2.16106
2012-12-08 17:56:08	-0.33	2.15	-0.00841218	0.336391	-2.19164
2012-12-08 17:57:08	-0.24	2.17	-0.00771774	0.244648	-2.21203
2012-12-08 17:58:08	-0.21	2.2	-0.00702329	0.214067	-2.24261
2012-12-08 17:59:08	-0.2	2.23	-0.00632885	0.203874	-2.27319
2012-12-08 18:00:08	-0.16	2.26	-0.0056344	0.163099	-2.30377
2012-12-08 18:01:08	-0.13	2.28	-0.00493996	0.132518	-2.32416
2012-12-08 18:02:08	-0.1	2.31	-0.00424552	0.101937	-2.35474
2012-12-08 18:03:08	-0.08	2.33	-0.00355107	0.0815494	-2.37513
2012-12-08 18:04:08	-0.06	2.35	-0.00285663	0.0611621	-2.39551
2012-12-08 18:05:08	-0.01	2.39	-0.00216218	0.0101937	-2.43629
2012-12-08 18:06:08	0.03	2.41	-0.00146774	-0.030581	-2.45668
2012-12-08 18:07:08	0.01	2.43	-0.000773293	-0.0101937	-2.47706
2012-12-08 18:08:08	0.19	2.46	-7.88484e-05	-0.19368	-2.50765
2012-12-08 18:09:08	0	2.4	0.000615596	0	-2.44648
2012-12-08 18:10:08	-0.19	2.29	0.00131004	0.19368	-2.33435
2012-12-08 18:11:08	-0.2	2.26	0.00200448	0.203874	-2.30377	2012-12-08 18:11:08
2012-12-08 18:12:08	-0.17	2.26	0.00269893	0.173293	-2.30377
2012-12-08 18:13:08	-0.13	2.28	0.00339337	0.132518	-2.32416
2012-12-08 18:14:08	-0.07	2.32	0.00408782	0.0713558	-2.36493
2012-12-08 18:15:08	-0.04	2.36	0.00478226	0.0407747	-2.40571
2012-12-08 18:16:08	0.01	2.4	0.00547671	-0.0101937	-2.44648
2012-12-08 18:17:08	0.04	2.43	0.00617115	-0.0407747	-2.47706
2012-12-08 18:18:08	0.08	2.46	0.0068656	-0.0815494	-2.50765
2012-12-08 18:19:08	0.1	2.49	0.00756004	-0.101937	-2.53823
2012-12-08 18:20:08	0.13	2.52	0.00825448	-0.132518	-2.56881
2012-12-08 18:21:08	0.16	2.55	0.00894893	-0.163099	-2.59939
2012-12-08 18:22:08	0.19	2.59	0.00964337	-0.19368	-2.64016
2012-12-08 18:23:08	0.22	2.61	0.0103378	-0.224261	-2.66055
2012-12-08 18:24:08	0.25	2.64	0.0110323	-0.254842	-2.69113
2012-12-08 18:25:08	0.28	2.67	0.0117267	-0.285423	-2.72171
2012-12-08 18:26:08	0.32	2.71	0.0124212	-0.326198	-2.76249
2012-12-08 18:27:08	0.34	2.73	0.0131156	-0.346585	-2.78287
2012-12-08 18:28:08	0.36	2.75	0.01381	-0.366972	-2.80326
2012-12-08 18:29:08	0.4	2.79	0.0145045	-0.407747	-2.84404
2012-12-08 18:30:08	0.41	2.81	0.0151989	-0.417941	-2.86442
2012-12-08 18:31:08	0.45	2.84	0.0158934	-0.458716	-2.89501
2012-12-08 18:32:08	0.48	2.86	0.0165878	-0.489297	-2.91539
2012-12-08 18:33:08	0.49	2.89	0.0172823	-0.49949	-2.94597
2012-12-08 18:34:08	0.52	2.92	0.0179767	-0.530071	-2.97655
2012-12-08 18:35:08	0.55	2.94	0.0186712	-0.560652	-2.99694
2012-12-08 18:36:08	0.58	2.97	0.0193656	-0.591233	-3.02752
2012-12-08 18:37:08	0.62	3	0.02006	-0.632008	-3.0581
2012-12-08 18:38:08	0.64	3.03	0.0207545	-0.652396	-3.08869
2012-12-08 18:39:08	0.66	3.05	0.0214489	-0.672783	-3.10907
2012-12-08 18:40:08	0.68	3.06	0.0221434	-0.69317	-3.11927
2012-12-08 18:41:08	0.7	3.09	0.0228378	-0.713558	-3.14985
2012-12-08 18:42:08	0.73	3.12	0.0235323	-0.744139	-3.18043
2012-12-08 18:43:08	0.75	3.14	0.0242267	-0.764526	-3.20082
2012-12-08 18:44:08	0.78	3.18	0.0249212	-0.795107	-3.24159
2012-12-08 18:45:08	0.8	3.19	0.0256156	-0.815494	-3.25178
2012-12-08 18:46:08	0.82	3.22	0.02631	-0.835882	-3.28236
2012-12-08 18:47:08	0.86	3.23	0.0270045	-0.876656	-3.29256
2012-12-08 18:48:08	0.88	3.27	0.0276989	-0.897044	-3.33333
2012-12-08 18:49:08	0.9	3.29	0.0283934	-0.917431	-3.35372
2012-12-08 18:50:08	0.92	3.31	0.0290878	-0.937819	-3.37411
2012-12-08 18:51:08	0.95	3.33	0.0297823	-0.9684	-3.3945
2012-12-08 19:01:08	1.17	3.56	0.0367267	-1.19266	-3.62895
2012-12-08 19:11:08	1.38	3.78	0.0436712	-1.40673	-3.85321	2012-12-08 19:11:08
2012-12-08 19:21:08	1.61	4	0.0506156	-1.64118	-4.07747
2012-12-08 19:31:08	1.79	4.2	0.05756	-1.82467	-4.28135
2012-12-08 19:41:08	1.99	4.39	0.0645045	-2.02854	-4.47503
2012-12-08 19:51:08	2.18	4.59	0.0714489	-2.22222	-4.6789
2012-12-08 20:01:08	2.32	4.78	0.0783934	-2.36493	-4.87258
2012-12-08 20:11:08	2.55	4.96	0.0853378	-2.59939	-5.05607	2012-12-08 20:11:08
2012-12-08 20:21:08	2.73	5.15	0.0922823	-2.78287	-5.24975
2012-12-08 20:31:08	2.9	5.32	0.0992267	-2.95617	-5.42304
2012-12-08 20:41:08	3.08	5.5	0.106171	-3.13965	-5.60652
2012-12-08 20:51:08	3.22	5.65	0.113116	-3.28236	-5.75943
2012-12-08 21:01:08	3.39	5.83	0.12006	-3.45566	-5.94292
2012-12-08 21:11:08	3.56	5.98	0.127004	-3.62895	-6.09582	2012-12-08 21:11:08
2012-12-08 21:21:08	3.7	6.13	0.133949	-3.77166	-6.24873
2012-12-08 21:31:08	3.86	6.3	0.140893	-3.93476	-6.42202
2012-12-08 21:41:08	4.01	6.45	0.147838	-4.08767	-6.57492
2012-12-08 21:51:08	4.16	6.6	0.154782	-4.24057	-6.72783
2012-12-08 22:01:08	4.31	6.76	0.161727	-4.39348	-6.89093
2012-12-08 22:11:08	4.47	6.92	0.168671	-4.55657	-7.05403	2012-12-08 22:11:08
2012-12-08 22:21:08	4.6	7.04	0.175616	-4.68909	-7.17635
2012-12-08 22:31:08	4.75	7.19	0.18256	-4.842	-7.32926
2012-12-08 22:41:08	4.86	7.32	0.189504	-4.95413	-7.46177
2012-12-08 22:51:08	5.01	7.47	0.196449	-5.10703	-7.61468
2012-12-08 23:01:08	4.88	7.32	0.203393	-4.97452	-7.46177
2012-12-08 23:11:08	5.1	7.54	0.210338	-5.19878	-7.68603	2012-12-08 23:11:08
2012-12-08 23:21:08	5.26	7.71	0.217282	-5.36188	-7.85933
2012-12-08 23:31:08	5.42	7.87	0.224227	-5.52497	-8.02243
2012-12-08 23:41:08	5.55	8.01	0.231171	-5.65749	-8.16514
2012-12-08 23:51:08	5.69	8.15	0.238116	-5.8002	-8.30785
2012-12-09 00:01:08	5.84	8.28	0.24506	-5.95311	-8.44037
2012-12-09 00:11:08	5.81	8.26	0.252004	-5.92253	-8.41998	2012-12-09 00:11:08
2012-12-09 00:21:08	5.97	8.44	0.258949	-6.08563	-8.60347
2012-12-09 00:31:08	6.13	8.58	0.265893	-6.24873	-8.74618
2012-12-09 00:41:08	6.25	8.71	0.272838	-6.37105	-8.8787
2012-12-09 00:51:08	6.4	8.86	0.279782	-6.52396	-9.0316
2012-12-09 01:01:08	6.53	8.99	0.286727	-6.65647	-9.16412
2012-12-09 01:11:08	6.65	9.11	0.293671	-6.7788	-9.28644	2012-12-09 01:11:08
2012-12-09 01:21:08	6.78	9.24	0.300616	-6.91131	-9.41896
2012-12-09 01:31:08	6.92	9.38	0.30756	-7.05403	-9.56167
2012-12-09 01:41:08	7.05	9.52	0.314504	-7.18654	-9.70438
2012-12-09 01:51:08	7.16	9.63	0.321449	-7.29867	-9.81651
2012-12-09 02:01:08	7.25	9.73	0.328393	-7.39042	-9.91845
2012-12-09 02:11:08	7.41	9.88	0.335338	-7.55352	-10.0714	2012-12-09 02:11:08
2012-12-09 02:21:08	7.53	10	0.342282	-7.67584	-10.1937
2012-12-09 02:31:08	7.66	10.13	0.349227	-7.80836	-10.3262
2012-12-09 02:41:08	7.78	10.25	0.356171	-7.93068	-10.4485
2012-12-09 02:51:08	7.89	10.36	0.363116	-8.04281	-10.5607
2012-12-09 03:01:08	8.01	10.49	0.37006	-8.16514	-10.6932
2012-12-09 03:11:08	8.13	10.61	0.377004	-8.28746	-10.8155	2012-12-09 03:11:08
2012-12-09 03:21:08	8.27	10.74	0.383949	-8.43017	-10.948
2012-12-09 03:31:08	8.34	10.81	0.390893	-8.50153	-11.0194
2012-12-09 03:41:08	8.48	10.95	0.397838	-8.64424	-11.1621
2012-12-09 03:51:08	8.59	11.06	0.404782	-8.75637	-11.2742
2012-12-09 04:01:08	8.68	11.15	0.411727	-8.84811	-11.366
2012-12-09 04:11:08	8.79	11.26	0.418671	-8.96024	-11.4781	2012-12-09 04:11:08
2012-12-09 04:21:08	8.9	11.38	0.425616	-9.07238	-11.6004
2012-12-09 04:31:08	9	11.48	0.43256	-9.17431	-11.7023
2012-12-09 04:41:08	9.12	11.6	0.439504	-9.29664	-11.8247
2012-12-09 04:51:08	9.25	11.73	0.446449	-9.42915	-11.9572
2012-12-09 05:01:08	9.36	11.85	0.453393	-9.54128	-12.0795
2012-12-09 05:11:08	9.5	11.98	0.460338	-9.684	-12.212	2012-12-09 05:11:08
2012-12-09 05:21:08	9.61	12.1	0.467282	-9.79613	-12.3344
2012-12-09 05:31:08	9.72	12.2	0.474227	-9.90826	-12.4363
2012-12-09 05:41:08	9.83	12.32	0.481171	-10.0204	-12.5586
2012-12-09 05:51:08	9.95	12.43	0.488116	-10.1427	-12.6707
2012-12-09 06:01:08	10.06	12.54	0.49506	-10.2548	-12.7829
2012-12-09 06:11:08	10.18	12.66	0.502004	-10.3772	-12.9052	2012-12-09 06:11:08
2012-12-09 06:21:08	10.25	12.72	0.508949	-10.4485	-12.9664
2012-12-09 06:31:08	10.4	12.88	0.515893	-10.6014	-13.1295
2012-12-09 06:41:08	10.49	12.98	0.522838	-10.6932	-13.2314
2012-12-09 06:51:08	10.55	13.04	0.529782	-10.7543	-13.2926
2012-12-09 07:01:08	10.69	13.17	0.536727	-10.897	-13.4251
2012-12-09 07:11:08	10.83	13.3	0.543671	-11.0398	-13.5576	2012-12-09 07:11:08
2012-12-09 07:21:08	10.92	13.39	0.550616	-11.1315	-13.6493
2012-12-09 07:31:08	11.03	13.51	0.55756	-11.2436	-13.7717
2012-12-09 07:41:08	11.13	13.62	0.564504	-11.3456	-13.8838
2012-12-09 07:51:08	11.25	13.73	0.571449	-11.4679	-13.9959
2012-12-09 08:01:08	11.33	13.82	0.578393	-11.5494	-14.0877
2012-12-09 08:11:08	11.46	13.95	0.585338	-11.682	-14.2202	2012-12-09 08:11:08
2012-12-09 08:21:08	11.55	14.04	0.592282	-11.7737	-14.3119
2012-12-09 08:31:08	11.67	14.15	0.599227	-11.896	-14.4241
2012-12-09 08:41:08	11.78	14.26	0.606171	-12.0082	-14.5362
2012-12-09 08:51:08	11.87	14.36	0.613116	-12.0999	-14.6381
2012-12-09 09:01:08	11.96	14.45	0.62006	-12.1916	-14.7299
2012-12-09 09:11:08	12.05	14.53	0.627004	-12.2834	-14.8114	2012-12-09 09:11:08
2012-12-09 09:21:08	12.17	14.65	0.633949	-12.4057	-14.9337
2012-12-09 09:31:08	12.25	14.72	0.640893	-12.4873	-15.0051
2012-12-09 09:41:08	12.38	14.86	0.647838	-12.6198	-15.1478
2012-12-09 09:51:08	12.33	14.82	0.654782	-12.5688	-15.107
2012-12-09 10:01:08	12.48	14.95	0.661727	-12.7217	-15.2396
2012-12-09 10:11:08	12.57	15	0.668671	-12.8135	-15.2905	2012-12-09 10:11:08
2012-12-09 10:21:08	12.61	15.09	0.675616	-12.8542	-15.3823
2012-12-09 10:31:08	12.7	15.19	0.68256	-12.946	-15.4842
2012-12-09 10:41:08	12.83	15.31	0.689504	-13.0785	-15.6065
2012-12-09 10:51:08	12.96	15.43	0.696449	-13.211	-15.7288
2012-12-09 11:01:08	13.05	15.55	0.703393	-13.3028	-15.8512
2012-12-09 11:11:08	13.19	15.72	0.710338	-13.4455	-16.0245	2012-12-09 11:11:08
2012-12-09 11:21:08	13.25	15.74	0.717282	-13.5066	-16.0449
2012-12-09 11:31:08	13.35	15.84	0.724227	-13.6086	-16.1468
2012-12-09 11:41:08	13.34	15.83	0.731171	-13.5984	-16.1366
2012-12-09 11:51:08	13.23	15.74	0.738116	-13.4862	-16.0449
2012-12-10 09:11:08	17.01	19.5	1.627	-17.3394	-19.8777
2012-12-10 09:21:08	17.08	19.55	1.63395	-17.4108	-19.9286	2012-12-10 09:21:08
2012-12-10 09:31:08	16.58	19.06	1.64089	-16.9011	-19.4292
2012-12-10 09:41:08	16.79	19.26	1.64784	-17.1152	-19.633
2012-12-10 09:51:08	16.94	19.42	1.65478	-17.2681	-19.7961
2012-12-10 10:01:08	17.06	19.54	1.66173	-17.3904	-19.9185
2012-12-10 10:11:08	17.1	19.57	1.66867	-17.4312	-19.949
2012-12-10 10:21:08	17.19	19.67	1.67562	-17.5229	-20.051	2012-12-10 10:21:08
2012-12-10 10:31:08	17.33	19.82	1.68256	-17.6656	-20.2039
2012-12-10 10:41:08	17.34	19.81	1.6895	-17.6758	-20.1937
2012-12-10 10:51:08	17.37	19.85	1.69645	-17.7064	-20.2345
2012-12-10 11:01:08	17.38	19.86	1.70339	-17.7166	-20.2446
2012-12-10 11:11:08	17.39	19.86	1.71034	-17.7268	-20.2446
2012-12-10 11:21:08	17.49	19.97	1.71728	-17.8287	-20.3568	2012-12-10 11:21:08
2012-12-10 11:31:08	17.53	20.02	1.72423	-17.8695	-20.4077
2012-12-10 11:41:08	17.46	19.94	1.73117	-17.7982	-20.3262
2012-12-10 11:51:08	17.59	20.07	1.73812	-17.9307	-20.4587
2012-12-10 12:01:08	17.63	20.11	1.74506	-17.9715	-20.4995
2012-12-10 12:11:08	17.69	20.17	1.752	-18.0326	-20.5607
2012-12-10 12:21:08	17.74	20.23	1.75895	-18.0836	-20.6218	2012-12-10 12:21:08
2012-12-10 12:31:08	17.66	20.14	1.76589	-18.002	-20.5301
2012-12-10 12:41:08	17.73	20.21	1.77284	-18.0734	-20.6014
2012-12-10 12:51:08	17.79	20.27	1.77978	-18.1346	-20.6626
2012-12-10 13:01:08	17.85	20.34	1.78673	-18.1957	-20.7339
2012-12-10 13:08:40	17.9	20.4	1.79196	-18.2467	-20.7951
2012-12-10 13:09:40	17.93	20.41	1.79266	-18.2773	-20.8053	2012-12-10 13:09:40
2012-12-10 13:10:40	17.94	20.42	1.79335	-18.2875	-20.8155
2012-12-10 13:11:40	17.91	20.41	1.79405	-18.2569	-20.8053
2012-12-10 13:12:40	17.94	20.43	1.79474	-18.2875	-20.8257
2012-12-10 13:13:40	17.93	20.42	1.79543	-18.2773	-20.8155
2012-12-10 13:14:40	17.94	20.44	1.79613	-18.2875	-20.8359
2012-12-10 13:15:40	17.96	20.45	1.79682	-18.3078	-20.8461	2012-12-10 13:15:40
2012-12-10 13:16:40	17.95	20.43	1.79752	-18.2977	-20.8257
2012-12-10 13:17:40	17.97	20.46	1.79821	-18.318	-20.8563
2012-12-10 13:18:40	17.98	20.47	1.79891	-18.3282	-20.8665
2012-12-10 13:19:40	17.99	20.49	1.7996	-18.3384	-20.8869
2012-12-10 13:20:40	18.01	20.49	1.8003	-18.3588	-20.8869
2012-12-10 13:21:40	17.99	20.47	1.80099	-18.3384	-20.8665	2012-12-10 13:21:40
2012-12-10 13:22:40	17.99	20.48	1.80168	-18.3384	-20.8767
2012-12-10 13:23:40	17.99	20.48	1.80238	-18.3384	-20.8767
2012-12-10 13:24:40	18	20.52	1.80307	-18.3486	-20.9174
2012-12-10 13:25:40	18.02	20.49	1.80377	-18.369	-20.8869
2012-12-10 13:26:40	18.01	20.5	1.80446	-18.3588	-20.897
2012-12-10 13:27:40	18.02	20.5	1.80516	-18.369	-20.897	2012-12-10 13:27:40
2012-12-10 13:28:40	18.01	20.5	1.80585	-18.3588	-20.897
2012-12-10 13:29:40	18.04	20.52	1.80655	-18.3894	-20.9174
2012-12-10 13:30:40	18.02	20.5	1.80724	-18.369	-20.897
2012-12-10 13:31:40	18.04	20.53	1.80793	-18.3894	-20.9276
2012-12-10 13:32:40	18.09	20.55	1.80863	-18.4404	-20.948
2012-12-10 13:33:40	18.07	20.55	1.80932	-18.42	-20.948	2012-12-10 13:33:40
2012-12-10 13:34:40	18.07	20.55	1.81002	-18.42	-20.948
2012-12-10 13:35:40	17.97	20.46	1.81071	-18.318	-20.8563
2012-12-10 13:36:40	18.02	20.52	1.81141	-18.369	-20.9174
2012-12-10 13:37:40	18.01	20.5	1.8121	-18.3588	-20.897
2012-12-10 13:38:40	18.06	20.54	1.8128	-18.4098	-20.9378
2012-12-10 13:39:40	18.04	20.53	1.81349	-18.3894	-20.9276	2012-12-10 13:39:40
2012-12-10 13:40:40	18.05	20.53	1.81418	-18.3996	-20.9276
2012-12-10 13:41:40	18.05	20.55	1.81488	-18.3996	-20.948
2012-12-10 13:42:40	18.07	20.54	1.81557	-18.42	-20.9378
2012-12-10 13:43:40	18.11	20.57	1.81627	-18.4608	-20.9684
2012-12-10 13:44:40	18.08	20.58	1.81696	-18.4302	-20.9786
2012-12-10 13:45:40	18.09	20.57	1.81766	-18.4404	-20.9684	2012-12-10 13:45:40
2012-12-10 13:46:40	18.1	20.59	1.81835	-18.4506	-20.9888
2012-12-10 13:47:40	18.09	20.58	1.81905	-18.4404	-20.9786
2012-12-10 13:48:40	18.11	20.59	1.81974	-18.4608	-20.9888
2012-12-10 13:49:40	18.13	20.6	1.82043	-18.4811	-20.999
2012-12-10 13:50:40	18.13	20.62	1.82113	-18.4811	-21.0194
2012-12-10 13:51:40	18.1	20.57	1.82182	-18.4506	-20.9684	2012-12-10 13:51:40
2012-12-10 13:52:40	18.11	20.6	1.82252	-18.4608	-20.999
2012-12-10 13:53:40	18.12	20.6	1.82321	-18.4709	-20.999
2012-12-10 13:54:40	18.13	20.64	1.82391	-18.4811	-21.0398
2012-12-10 13:55:40	18.13	20.62	1.8246	-18.4811	-21.0194
2012-12-10 13:56:40	18.14	20.61	1.8253	-18.4913	-21.0092
2012-12-10 13:57:40	18.13	20.6	1.82599	-18.4811	-20.999	2012-12-10 13:57:40
2012-12-10 13:58:40	18.13	20.62	1.82668	-18.4811	-21.0194
2012-12-10 13:59:40	18.12	20.64	1.82738	-18.4709	-21.0398
2012-12-10 14:00:40	18.12	20.63	1.82807	-18.4709	-21.0296
2012-12-10 14:01:40	18.16	20.64	1.82877	-18.5117	-21.0398
2012-12-10 14:02:40	18.17	20.65	1.82946	-18.5219	-21.0499
2012-12-10 14:03:40	18.15	20.63	1.83016	-18.5015	-21.0296	2012-12-10 14:03:40
2012-12-10 14:04:40	18.17	20.65	1.83085	-18.5219	-21.0499
2012-12-10 14:05:40	18.17	20.65	1.83155	-18.5219	-21.0499
2012-12-10 14:06:40	18.17	20.66	1.83224	-18.5219	-21.0601
2012-12-10 14:07:40	18.19	20.67	1.83293	-18.5423	-21.0703
2012-12-10 14:08:40	18.16	20.65	1.83363	-18.5117	-21.0499
2012-12-10 14:18:40	18.18	20.67	1.84057	-18.5321	-21.0703	2012-12-10 14:18:40
2012-12-10 14:28:40	18.25	20.74	1.84752	-18.6035	-21.1417
2012-12-10 14:38:40	18.26	20.75	1.85446	-18.6137	-21.1519
2012-12-10 14:48:40	18.32	20.81	1.86141	-18.6748	-21.213
2012-12-10 14:58:40	18.35	20.83	1.86835	-18.7054	-21.2334
2012-12-10 15:08:40	18.41	20.9	1.8753	-18.7666	-21.3048
2012-12-10 15:18:40	18.51	20.99	1.88224	-18.8685	-21.3965	2012-12-10 15:18:40
2012-12-10 15:28:40	18.53	21.01	1.88918	-18.8889	-21.4169
2012-12-10 15:38:40	18.56	21.03	1.89613	-18.9195	-21.4373
2012-12-10 15:48:40	18.01	20.5	1.90307	-18.3588	-20.897
2012-12-10 15:58:40	18.22	20.7	1.91002	-18.5729	-21.1009
2012-12-10 16:08:40	18.24	20.82	1.91696	-18.5933	-21.2232
2012-12-10 16:18:40	18.36	20.84	1.92391	-18.7156	-21.2436	2012-12-10 16:18:40
2012-12-10 16:28:40	18.49	20.96	1.93085	-18.8481	-21.366
2012-12-10 16:38:40	18.57	21.07	1.9378	-18.9297	-21.4781
2012-12-10 16:48:40	18.64	21.12	1.94474	-19.001	-21.5291
2012-12-10 16:58:40	18.65	21.15	1.95168	-19.0112	-21.5596
2012-12-10 17:08:40	18.72	21.2	1.95863	-19.0826	-21.6106
2012-12-10 17:18:40	18.77	21.27	1.96557	-19.1335	-21.682	2012-12-10 17:18:40
2012-12-10 17:28:40	18.83	21.32	1.97252	-19.1947	-21.7329
2012-12-10 17:38:40	18.88	21.36	1.97946	-19.2457	-21.7737
2012-12-10 17:48:40	18.53	21.02	1.98641	-18.8889	-21.4271
2012-12-10 17:58:40	18.69	21.18	1.99335	-19.052	-21.5902
2012-12-10 18:08:40	18.7	21.2	2.0003	-19.0622	-21.6106
2012-12-10 18:18:40	18.82	21.31	2.00724	-19.1845	-21.7227	2012-12-10 18:18:40
2012-12-10 18:28:40	18.84	21.35	2.01418	-19.2049	-21.7635
2012-12-10 18:38:40	18.93	21.44	2.02113	-19.2966	-21.8552
2012-12-10 18:48:40	18.98	21.48	2.02807	-19.3476	-21.896
2012-12-10 18:58:40	19.05	21.55	2.03502	-19.419	-21.9674
2012-12-10 19:08:40	19.1	21.59	2.04196	-19.4699	-22.0082
2012-12-10 19:18:40	19.09	21.59	2.04891	-19.4597	-22.0082	2012-12-10 19:18:40
2012-12-10 19:28:40	19.18	21.67	2.05585	-19.5515	-22.0897
2012-12-10 19:38:40	19.25	21.74	2.0628	-19.6228	-22.1611
2012-12-10 19:48:40	19.23	21.72	2.06974	-19.6024	-22.1407
2012-12-10 19:58:40	19.28	21.76	2.07668	-19.6534	-22.1814
2012-12-10 20:08:40	18.94	21.45	2.08363	-19.3068	-21.8654
2012-12-10 20:18:40	19.17	21.66	2.09057	-19.5413	-22.0795	2012-12-10 20:18:40
2012-12-10 20:28:40	19.23	21.73	2.09752	-19.6024	-22.1509
2012-12-10 20:38:40	19.23	21.72	2.10446	-19.6024	-22.1407
2012-12-10 20:48:40	19.29	21.79	2.11141	-19.6636	-22.212
2012-12-10 20:58:40	19.35	21.84	2.11835	-19.7248	-22.263
2012-12-10 21:08:40	19.4	21.91	2.1253	-19.7757	-22.3344
2012-12-10 21:18:40	19.45	21.95	2.13224	-19.8267	-22.3751	2012-12-10 21:18:40
2012-12-10 21:28:40	19.5	22	2.13918	-19.8777	-22.4261
2012-12-10 21:38:40	19.55	22.05	2.14613	-19.9286	-22.4771
2012-12-10 21:48:40	19.56	22.06	2.15307	-19.9388	-22.4873
2012-12-10 21:58:40	19.42	21.92	2.16002	-19.7961	-22.3445
2012-12-10 22:08:40	19.57	22.07	2.16696	-19.949	-22.4975
2012-12-10 22:18:40	19.63	22.13	2.17391	-20.0102	-22.5586	2012-12-10 22:18:40
2012-12-10 22:28:40	19.72	22.21	2.18085	-20.1019	-22.6402
2012-12-10 22:38:40	19.76	22.26	2.1878	-20.1427	-22.6911
2012-12-10 22:48:40	19.8	22.3	2.19474	-20.1835	-22.7319
2012-12-10 22:58:40	19.78	22.29	2.20168	-20.1631	-22.7217
2012-12-10 23:08:40	19.81	22.32	2.20863	-20.1937	-22.7523
2012-12-10 23:18:40	19.04	21.55	2.21557	-19.4088	-21.9674	2012-12-10 23:18:40
2012-12-10 23:28:40	19.24	21.74	2.22252	-19.6126	-22.1611
2012-12-10 23:38:40	19.48	22	2.22946	-19.8573	-22.4261
2012-12-10 23:48:40	19.59	22.11	2.23641	-19.9694	-22.5382
2012-12-10 23:58:40	19.54	22.05	2.24335	-19.9185	-22.4771
2012-12-11 00:08:40	19.73	22.24	2.2503	-20.1121	-22.6707
2012-12-11 00:18:40	19.8	22.3	2.25724	-20.1835	-22.7319	2012-12-11 00:18:40
2012-12-11 00:28:40	19.92	22.4	2.26418	-20.3058	-22.8338
2012-12-11 00:38:40	19.98	22.48	2.27113	-20.367	-22.9154
2012-12-11 00:48:40	20.02	22.52	2.27807	-20.4077	-22.9562
2012-12-11 00:58:40	20.04	22.55	2.28502	-20.4281	-22.9867
2012-12-11 01:08:40	20.09	22.6	2.29196	-20.4791	-23.0377
2012-12-11 01:18:40	20.14	22.65	2.29891	-20.5301	-23.0887	2012-12-11 01:18:40
2012-12-11 01:28:40	20.2	22.71	2.30585	-20.5912	-23.1498
2012-12-11 01:38:40	20.22	22.72	2.3128	-20.6116	-23.16
2012-12-11 01:48:40	20.26	22.76	2.31974	-20.6524	-23.2008
2012-12-11 01:58:40	20.2	22.81	2.32668	-20.5912	-23.2518
2012-12-11 02:08:40	20.28	22.79	2.33363	-20.6728	-23.2314
2012-12-11 02:18:40	20.36	22.87	2.34057	-20.7543	-23.3129	2012-12-11 02:18:40
2012-12-11 02:28:40	20.41	22.91	2.34752	-20.8053	-23.3537
2012-12-11 02:38:40	20.44	22.94	2.35446	-20.8359	-23.3843
2012-12-11 02:48:40	20.49	23	2.36141	-20.8869	-23.4455
2012-12-11 02:58:40	20.49	22.99	2.36835	-20.8869	-23.4353
2012-12-11 03:08:40	20.56	23.05	2.3753	-20.9582	-23.4964
2012-12-11 03:18:40	20.43	23.04	2.38224	-20.8257	-23.4862	2012-12-11 03:18:40
2012-12-11 03:28:40	20.37	23.03	2.38918	-20.7645	-23.476
2012-12-11 03:38:40	20.44	23.08	2.39613	-20.8359	-23.527
2012-12-11 03:48:40	20.62	23.13	2.40307	-21.0194	-23.578
2012-12-11 03:58:40	20.63	23.13	2.41002	-21.0296	-23.578
2012-12-11 04:08:40	20.72	23.22	2.41696	-21.1213	-23.6697
2012-12-11 04:18:40	20.73	23.23	2.42391	-21.1315	-23.6799	2012-12-11 04:18:40
2012-12-11 04:28:40	20.72	23.21	2.43085	-21.1213	-23.6595
2012-12-11 04:38:40	20.69	23.19	2.4378	-21.0907	-23.6391
2012-12-11 04:48:40	20.67	23.17	2.44474	-21.0703	-23.6188
2012-12-11 04:58:40	20.72	23.23	2.45168	-21.1213	-23.6799
2012-12-11 05:08:40	20.76	23.27	2.45863	-21.1621	-23.7207
2012-12-11 05:18:40	20.77	23.28	2.46557	-21.1723	-23.7309	2012-12-11 05:18:40
2012-12-11 05:28:40	20.75	23.25	2.47252	-21.1519	-23.7003
2012-12-11 05:38:40	20.84	23.34	2.47946	-21.2436	-23.792
2012-12-11 05:48:40	20.76	23.27	2.48641	-21.1621	-23.7207
2012-12-11 05:58:40	20.8	23.31	2.49335	-21.2029	-23.7615
2012-12-11 06:08:40	20.84	23.34	2.5003	-21.2436	-23.792
2012-12-11 06:18:40	20.91	23.4	2.50724	-21.315	-23.8532	2012-12-11 06:18:40
2012-12-11 06:28:40	20.92	23.39	2.51418	-21.3252	-23.843
2012-12-11 06:38:40	20.91	23.41	2.52113	-21.315	-23.8634
2012-12-11 06:48:40	20.9	23.41	2.52807	-21.3048	-23.8634
2012-12-11 06:58:40	21	23.5	2.53502	-21.4067	-23.9551
2012-12-11 07:08:40	21.05	23.55	2.54196	-21.4577	-24.0061
2012-12-11 07:18:40	20.98	23.47	2.54891	-21.3863	-23.9246	2012-12-11 07:18:40
2012-12-11 07:28:40	21.03	23.52	2.55585	-21.4373	-23.9755
2012-12-11 07:38:40	21.1	23.58	2.5628	-21.5087	-24.0367
2012-12-11 07:48:40	21.1	23.58	2.56974	-21.5087	-24.0367
2012-12-11 07:58:40	21.14	23.63	2.57668	-21.5494	-24.0877
2012-12-11 08:08:40	21.17	23.68	2.58363	-21.58	-24.1386
2012-12-11 08:18:40	21.22	23.72	2.59057	-21.631	-24.1794	2012-12-11 08:18:40
2012-12-11 08:28:40	21.18	23.69	2.59752	-21.5902	-24.1488
2012-12-11 08:38:40	21.23	23.73	2.60446	-21.6412	-24.1896
2012-12-11 08:48:40	21.3	23.8	2.61141	-21.7125	-24.261
2012-12-11 08:58:40	21.35	23.85	2.61835	-21.7635	-24.3119
2012-12-11 09:08:40	21.36	23.86	2.6253	-21.7737	-24.3221
2012-12-11 09:18:40	21.33	23.83	2.63224	-21.7431	-24.2915	2012-12-11 09:18:40
2012-12-11 09:28:40	21.38	23.89	2.63918	-21.7941	-24.3527
2012-12-11 09:38:40	21.41	23.92	2.64613	-21.8247	-24.3833
2012-12-11 09:48:40	21.45	23.99	2.65307	-21.8654	-24.4546
2012-12-11 09:58:40	21.51	24.01	2.66002	-21.9266	-24.475
2012-12-11 10:08:40	21.54	24.04	2.66696	-21.9572	-24.5056
2012-12-11 10:18:40	21.54	24.05	2.67391	-21.9572	-24.5158	2012-12-11 10:18:40
2012-12-11 10:28:40	21.58	24.09	2.68085	-21.998	-24.5566
2012-12-11 10:38:40	21.52	24.1	2.6878	-21.9368	-24.5668
2012-12-11 10:48:40	21.64	24.13	2.69474	-22.0591	-24.5973
2012-12-11 10:58:40	21.5	24.15	2.70168	-21.9164	-24.6177
2012-12-11 11:08:40	21.68	24.19	2.70863	-22.0999	-24.6585
2012-12-11 11:18:40	21.64	24.18	2.71557	-22.0591	-24.6483	2012-12-11 11:18:40
2012-12-11 11:28:40	21.73	24.23	2.72252	-22.1509	-24.6993
2012-12-11 11:38:40	21.73	24.24	2.72946	-22.1509	-24.7095
2012-12-11 11:48:40	21.78	24.29	2.73641	-22.2018	-24.7604
2012-12-11 11:58:40	21.49	23.99	2.74335	-21.9062	-24.4546
2012-12-11 12:08:40	21.64	24.13	2.7503	-22.0591	-24.5973
2012-12-11 12:18:40	21.81	24.31	2.75724	-22.2324	-24.7808	2012-12-11 12:18:40
2012-12-11 12:28:40	21.84	24.33	2.76418	-22.263	-24.8012
2012-12-11 12:38:40	21.84	24.33	2.77113	-22.263	-24.8012
2012-12-11 12:48:40	21.89	24.38	2.77807	-22.314	-24.8522
2012-12-11 12:58:40	21.76	24.39	2.78502	-22.1814	-24.8624
2012-12-11 13:08:40	21.88	24.38	2.79196	-22.3038	-24.8522
2012-12-11 13:18:40	21.94	24.44	2.79891	-22.3649	-24.9134	2012-12-11 13:18:40
2012-12-11 13:28:40	21.96	24.46	2.80585	-22.3853	-24.9337
2012-12-11 13:38:40	21.95	24.44	2.8128	-22.3751	-24.9134
2012-12-11 13:48:40	22.02	24.5	2.81974	-22.4465	-24.9745
2012-12-11 13:58:40	21.93	24.43	2.82668	-22.3547	-24.9032
2012-12-11 14:08:40	21.89	24.49	2.83363	-22.314	-24.9643
2012-12-11 14:18:40	21.97	24.47	2.84057	-22.3955	-24.9439	2012-12-11 14:18:40
2012-12-11 14:28:40	21.98	24.48	2.84752	-22.4057	-24.9541
2012-12-11 14:38:40	21.93	24.44	2.85446	-22.3547	-24.9134
2012-12-11 14:48:40	21.62	24.11	2.86141	-22.0387	-24.577
2012-12-11 14:58:40	21.82	24.31	2.86835	-22.2426	-24.7808
2012-12-11 15:08:40	21.84	24.34	2.8753	-22.263	-24.8114
2012-12-11 15:18:40	21.94	24.43	2.88224	-22.3649	-24.9032	2012-12-11 15:18:40
2012-12-11 15:28:40	21.88	24.51	2.88918	-22.3038	-24.9847
2012-12-11 15:38:40	21.98	24.55	2.89613	-22.4057	-25.0255
2012-12-11 15:48:40	21.96	24.58	2.90307	-22.3853	-25.0561
2012-12-11 15:58:40	22	24.61	2.91002	-22.4261	-25.0866
2012-12-11 16:08:40	22	24.63	2.91696	-22.4261	-25.107
2012-12-11 16:18:40	21.96	24.55	2.92391	-22.3853	-25.0255	2012-12-11 16:18:40
2012-12-11 16:28:40	22.14	24.64	2.93085	-22.5688	-25.1172
2012-12-11 16:38:40	22.19	24.68	2.9378	-22.6198	-25.158
2012-12-11 16:48:40	22.11	24.59	2.94474	-22.5382	-25.0663
2012-12-11 16:58:40	21.34	23.86	2.95168	-21.7533	-24.3221
2012-12-11 17:08:40	21.66	24.17	2.95863	-22.0795	-24.6381
2012-12-11 17:18:40	21.88	24.41	2.96557	-22.3038	-24.8828	2012-12-11 17:18:40
2012-12-11 17:28:40	21.86	24.39	2.97252	-22.2834	-24.8624
2012-12-11 17:38:40	21.48	24.1	2.97946	-21.896	-24.5668
2012-12-11 17:48:40	21.8	24.33	2.98641	-22.2222	-24.8012
2012-12-11 17:58:40	21.85	24.47	2.99335	-22.2732	-24.9439
2012-12-11 18:08:40	22.1	24.6	3.0003	-22.528	-25.0765
2012-12-11 18:18:40	22.15	24.65	3.00724	-22.579	-25.1274	2012-12-11 18:18:40
2012-12-11 18:28:40	22.11	24.75	3.01418	-22.5382	-25.2294
2012-12-11 18:38:40	22.22	24.71	3.02113	-22.6504	-25.1886
2012-12-11 18:48:40	22.17	24.79	3.02807	-22.5994	-25.2701
2012-12-11 18:58:40	22.27	24.82	3.03502	-22.7013	-25.3007
2012-12-11 19:08:40	22.24	24.85	3.04196	-22.6707	-25.3313
2012-12-11 19:18:40	22.26	24.85	3.04891	-22.6911	-25.3313	2012-12-11 19:18:40
2012-12-11 19:28:40	22.32	24.92	3.05585	-22.7523	-25.4027
2012-12-11 19:38:40	22.49	24.98	3.0628	-22.9256	-25.4638
2012-12-11 19:48:40	22.41	24.97	3.06974	-22.844	-25.4536
2012-12-11 19:58:40	22.4	24.96	3.07668	-22.8338	-25.4434
2012-12-11 20:08:40	22.46	25.02	3.08363	-22.895	-25.5046
2012-12-11 20:18:40	22.41	24.98	3.09057	-22.844	-25.4638	2012-12-11 20:18:40
2012-12-11 20:28:40	22.54	25.1	3.09752	-22.9766	-25.5861
2012-12-11 20:38:40	22.58	25.14	3.10446	-23.0173	-25.6269
2012-12-11 20:48:40	22.61	25.17	3.11141	-23.0479	-25.6575
2012-12-11 20:58:40	22.66	25.21	3.11835	-23.0989	-25.6983
2012-12-11 21:08:40	22.69	25.24	3.1253	-23.1295	-25.7288
2012-12-11 21:18:40	22.73	25.28	3.13224	-23.1702	-25.7696	2012-12-11 21:18:40
2012-12-11 21:28:40	22.76	25.3	3.13918	-23.2008	-25.79
2012-12-11 21:38:40	22.74	25.36	3.14613	-23.1804	-25.8512
2012-12-11 21:48:40	22.84	25.38	3.15307	-23.2824	-25.8716
2012-12-11 21:58:40	22.87	25.4	3.16002	-23.3129	-25.8919
2012-12-11 22:08:40	22.86	25.4	3.16696	-23.3028	-25.8919
2012-12-11 22:18:40	22.91	25.44	3.17391	-23.3537	-25.9327	2012-12-11 22:18:40
2012-12-11 22:28:40	22.96	25.5	3.18085	-23.4047	-25.9939
2012-12-11 22:38:40	22.99	25.54	3.1878	-23.4353	-26.0347
2012-12-11 22:48:40	22.99	25.54	3.19474	-23.4353	-26.0347
2012-12-11 22:58:40	22.98	25.55	3.20168	-23.4251	-26.0449
2012-12-11 23:08:40	23.01	25.58	3.20863	-23.4557	-26.0754
2012-12-11 23:18:40	23	25.59	3.21557	-23.4455	-26.0856	2012-12-11 23:18:40
2012-12-11 23:28:40	23.04	25.62	3.22252	-23.4862	-26.1162
2012-12-11 23:38:40	23.04	25.62	3.22946	-23.4862	-26.1162
2012-12-11 23:48:40	23.05	25.64	3.23641	-23.4964	-26.1366
2012-12-11 23:58:40	23.1	25.69	3.24335	-23.5474	-26.1876
2012-12-12 00:08:40	23.13	25.72	3.2503	-23.578	-26.2181
2012-12-12 00:18:40	23.15	25.75	3.25724	-23.5984	-26.2487	2012-12-12 00:18:40
2012-12-12 00:28:40	23.15	25.76	3.26418	-23.5984	-26.2589
2012-12-12 00:38:40	23.15	25.76	3.27113	-23.5984	-26.2589
2012-12-12 00:48:40	23.2	25.81	3.27807	-23.6493	-26.3099
2012-12-12 00:58:40	23.22	25.83	3.28502	-23.6697	-26.3303
2012-12-12 01:08:40	23.23	25.84	3.29196	-23.6799	-26.3405
2012-12-12 01:18:40	23.29	25.9	3.29891	-23.7411	-26.4016	2012-12-12 01:18:40
2012-12-12 01:28:40	23.3	25.91	3.30585	-23.7513	-26.4118
2012-12-12 01:38:40	23.32	25.94	3.3128	-23.7717	-26.4424
2012-12-12 01:48:40	23.35	25.96	3.31974	-23.8022	-26.4628
2012-12-12 01:58:40	23.38	26	3.32668	-23.8328	-26.5036
2012-12-12 02:08:40	23.43	26.04	3.33363	-23.8838	-26.5443
2012-12-12 02:18:40	23.37	25.98	3.34057	-23.8226	-26.4832	2012-12-12 02:18:40
2012-12-12 02:28:40	23.46	26.07	3.34752	-23.9144	-26.5749
2012-12-12 02:38:40	23.48	26.1	3.35446	-23.9348	-26.6055
2012-12-12 02:48:40	23.48	26.11	3.36141	-23.9348	-26.6157
2012-12-12 02:58:40	23.51	26.14	3.36835	-23.9653	-26.6463
2012-12-12 03:08:40	23.47	26.09	3.3753	-23.9246	-26.5953
2012-12-12 03:18:40	23.44	26.08	3.38224	-23.894	-26.5851	2012-12-12 03:18:40
2012-12-12 03:28:40	23.51	26.15	3.38918	-23.9653	-26.6565
2012-12-12 03:38:40	23.55	26.18	3.39613	-24.0061	-26.6871
2012-12-12 03:48:40	23.52	26.13	3.40307	-23.9755	-26.6361
2012-12-12 03:58:40	23.53	26.16	3.41002	-23.9857	-26.6667
2012-12-12 04:08:40	23.45	26.08	3.41696	-23.9042	-26.5851
2012-12-12 04:18:40	23.52	26.16	3.42391	-23.9755	-26.6667	2012-12-12 04:18:40
2012-12-12 04:28:40	23.56	26.19	3.43085	-24.0163	-26.6972
2012-12-12 04:38:40	23.53	26.17	3.4378	-23.9857	-26.6769
2012-12-12 04:48:40	23.61	26.23	3.44474	-24.0673	-26.738
2012-12-12 04:58:40	23.63	26.26	3.45168	-24.0877	-26.7686
2012-12-12 05:08:40	23.57	26.21	3.45863	-24.0265	-26.7176
2012-12-12 05:18:40	23.62	26.26	3.46557	-24.0775	-26.7686	2012-12-12 05:18:40
2012-12-12 05:28:40	23.65	26.29	3.47252	-24.1081	-26.7992
2012-12-12 05:38:40	23.66	26.31	3.47946	-24.1182	-26.8196
2012-12-12 05:48:40	23.68	26.33	3.48641	-24.1386	-26.84
2012-12-12 05:58:40	23.62	26.27	3.49335	-24.0775	-26.7788
2012-12-12 06:08:40	23.71	26.36	3.5003	-24.1692	-26.8705
2012-12-12 06:18:40	23.74	26.4	3.50724	-24.1998	-26.9113	2012-12-12 06:18:40
2012-12-12 06:28:40	23.77	26.42	3.51418	-24.2304	-26.9317
2012-12-12 06:38:40	23.81	26.45	3.52113	-24.2712	-26.9623
2012-12-12 06:48:40	23.82	26.47	3.52807	-24.2813	-26.9827
2012-12-12 06:58:40	23.81	26.44	3.53502	-24.2712	-26.9521
2012-12-12 07:08:40	23.83	26.49	3.54196	-24.2915	-27.0031
2012-12-12 07:18:40	23.89	26.52	3.54891	-24.3527	-27.0336	2012-12-12 07:18:40
2012-12-12 07:28:40	23.91	26.54	3.55585	-24.3731	-27.054
2012-12-12 07:38:40	23.92	26.56	3.5628	-24.3833	-27.0744
2012-12-12 07:48:40	23.91	26.56	3.56974	-24.3731	-27.0744
2012-12-12 07:58:40	23.94	26.58	3.57668	-24.4037	-27.0948
2012-12-12 08:08:40	23.95	26.6	3.58363	-24.4139	-27.1152
2012-12-12 08:18:40	24.03	26.67	3.59057	-24.4954	-27.1865	2012-12-12 08:18:40
2012-12-12 08:28:40	24.05	26.7	3.59752	-24.5158	-27.2171
2012-12-12 08:38:40	24.04	26.68	3.60446	-24.5056	-27.1967
2012-12-12 08:48:40	24.16	26.75	3.61141	-24.6279	-27.2681
2012-12-12 08:58:40	24.03	26.68	3.61835	-24.4954	-27.1967
2012-12-12 09:08:40	24.11	26.74	3.6253	-24.577	-27.2579
2012-12-12 09:18:40	24.14	26.79	3.63224	-24.6075	-27.3089	2012-12-12 09:18:40
2012-12-12 09:28:40	23.75	26.41	3.63918	-24.21	-26.9215
2012-12-12 09:38:40	24	26.65	3.64613	-24.4648	-27.1662
2012-12-12 09:48:40	24.15	26.8	3.65307	-24.6177	-27.3191
2012-12-12 09:58:40	24.19	26.85	3.66002	-24.6585	-27.37
2012-12-12 10:08:40	24.21	26.86	3.66696	-24.6789	-27.3802
2012-12-12 10:18:40	24.24	26.87	3.67391	-24.7095	-27.3904	2012-12-12 10:18:40
2012-12-12 10:28:40	24.28	26.93	3.68085	-24.7503	-27.4516
2012-12-12 10:38:40	24.31	26.96	3.6878	-24.7808	-27.4822
2012-12-12 10:48:40	24.29	26.95	3.69474	-24.7604	-27.472
2012-12-12 10:58:40	24.34	26.99	3.70168	-24.8114	-27.5127
2012-12-12 11:08:40	24.35	27.01	3.70863	-24.8216	-27.5331
2012-12-12 11:18:40	24.49	27.02	3.71557	-24.9643	-27.5433	2012-12-12 11:18:40
2012-12-12 11:28:40	24.43	27.09	3.72252	-24.9032	-27.6147
2012-12-12 11:38:40	24.47	27.11	3.72946	-24.9439	-27.6351
2012-12-12 11:48:40	24.43	27.07	3.73641	-24.9032	-27.5943
2012-12-12 11:58:40	24.49	27.15	3.74335	-24.9643	-27.6758
2012-12-12 12:08:40	24.5	27.14	3.7503	-24.9745	-27.6656
2012-12-12 12:18:40	24.51	27.16	3.75724	-24.9847	-27.686	2012-12-12 12:18:40
2012-12-12 12:28:40	24.53	27.18	3.76418	-25.0051	-27.7064
2012-12-12 12:38:40	24.55	27.19	3.77113	-25.0255	-27.7166
2012-12-12 12:48:40	24.59	27.23	3.77807	-25.0663	-27.7574
2012-12-12 12:58:40	24.6	27.24	3.78502	-25.0765	-27.7676
2012-12-12 13:08:40	24.62	27.25	3.79196	-25.0968	-27.7778
2012-12-12 13:18:40	24.65	27.29	3.79891	-25.1274	-27.8186	2012-12-12 13:18:40
2012-12-12 13:28:40	24.66	27.28	3.80585	-25.1376	-27.8084
2012-12-12 13:38:40	24.68	27.32	3.8128	-25.158	-27.8491
2012-12-12 13:48:40	24.73	27.36	3.81974	-25.209	-27.8899
2012-12-12 13:58:40	24.77	27.39	3.82668	-25.2497	-27.9205
2012-12-12 14:08:40	24.78	27.42	3.83363	-25.2599	-27.9511
2012-12-12 14:18:40	24.77	27.4	3.84057	-25.2497	-27.9307	2012-12-12 14:18:40
2012-12-12 14:28:40	24.73	27.37	3.84752	-25.209	-27.9001
2012-12-12 14:38:40	24.82	27.46	3.85446	-25.3007	-27.9918
2012-12-12 14:48:40	24.84	27.48	3.86141	-25.3211	-28.0122
2012-12-12 14:58:40	24.86	27.51	3.86835	-25.3415	-28.0428
2012-12-12 15:08:40	24.88	27.51	3.8753	-25.3619	-28.0428
2012-12-12 15:18:40	24.9	27.54	3.88224	-25.3823	-28.0734	2012-12-12 15:18:40
2012-12-12 15:28:40	24.95	27.58	3.88918	-25.4332	-28.1142
2012-12-12 15:38:40	24.92	27.56	3.89613	-25.4027	-28.0938
2012-12-12 15:48:40	24.95	27.6	3.90307	-25.4332	-28.1346
2012-12-12 15:58:40	24.99	27.63	3.91002	-25.474	-28.1651
2012-12-12 16:08:40	25.01	27.65	3.91696	-25.4944	-28.1855
2012-12-12 16:18:40	25.03	27.67	3.92391	-25.5148	-28.2059	2012-12-12 16:18:40
2012-12-12 16:28:40	25.08	27.72	3.93085	-25.5657	-28.2569
2012-12-12 16:38:40	25.1	27.74	3.9378	-25.5861	-28.2773
2012-12-12 16:48:40	25.13	27.77	3.94474	-25.6167	-28.3078
2012-12-12 16:58:40	25.12	27.76	3.95168	-25.6065	-28.2977
2012-12-12 17:08:40	25.15	27.79	3.95863	-25.6371	-28.3282
2012-12-12 17:18:40	25.17	27.81	3.96557	-25.6575	-28.3486	2012-12-12 17:18:40
2012-12-12 17:28:40	24.92	27.58	3.97252	-25.4027	-28.1142
2012-12-12 17:38:40	25.13	27.78	3.97946	-25.6167	-28.318
2012-12-12 17:48:40	25.18	27.84	3.98641	-25.6677	-28.3792
2012-12-12 17:58:40	25.27	27.93	3.99335	-25.7594	-28.4709
2012-12-12 18:08:40	25.28	27.93	4.0003	-25.7696	-28.4709
2012-12-12 18:18:40	25.31	27.96	4.00724	-25.8002	-28.5015	2012-12-12 18:18:40
2012-12-12 18:28:40	25.34	27.99	4.01418	-25.8308	-28.5321
2012-12-12 18:38:40	25.37	28.02	4.02113	-25.8614	-28.5627
2012-12-12 18:48:40	25.42	28.07	4.02807	-25.9123	-28.6137
2012-12-12 18:58:40	25.42	28.07	4.03502	-25.9123	-28.6137
2012-12-12 19:08:40	25.44	28.09	4.04196	-25.9327	-28.634
2012-12-12 19:18:40	25.42	28.07	4.04891	-25.9123	-28.6137	2012-12-12 19:18:40
2012-12-12 19:28:40	25.48	28.13	4.05585	-25.9735	-28.6748
2012-12-12 19:38:40	25.53	28.18	4.0628	-26.0245	-28.7258
2012-12-12 19:48:40	25.56	28.21	4.06974	-26.055	-28.7564
2012-12-12 19:58:40	25.55	28.21	4.07668	-26.0449	-28.7564
2012-12-12 20:08:40	25.6	28.26	4.08363	-26.0958	-28.8073
2012-12-12 20:18:40	25.64	28.3	4.09057	-26.1366	-28.8481	2012-12-12 20:18:40
2012-12-12 20:28:40	25.66	28.31	4.09752	-26.157	-28.8583
2012-12-12 20:38:40	25.71	28.36	4.10446	-26.208	-28.9093
2012-12-12 20:48:40	25.71	28.37	4.11141	-26.208	-28.9195
2012-12-12 20:58:40	25.75	28.4	4.11835	-26.2487	-28.9501
2012-12-12 21:08:40	25.74	28.38	4.1253	-26.2385	-28.9297
2012-12-12 21:18:40	25.77	28.42	4.13224	-26.2691	-28.9704	2012-12-12 21:18:40
2012-12-12 21:28:40	25.78	28.42	4.13918	-26.2793	-28.9704
2012-12-12 21:38:40	25.82	28.47	4.14613	-26.3201	-29.0214
2012-12-12 21:48:40	25.55	28.2	4.15307	-26.0449	-28.7462
2012-12-12 21:58:40	25.68	28.33	4.16002	-26.1774	-28.8787
2012-12-12 22:08:40	25.79	28.43	4.16696	-26.2895	-28.9806
2012-12-12 22:18:40	25.84	28.5	4.17391	-26.3405	-29.052	2012-12-12 22:18:40
2012-12-12 22:28:40	25.84	28.5	4.18085	-26.3405	-29.052
2012-12-12 22:38:40	25.87	28.53	4.1878	-26.371	-29.0826
2012-12-12 22:48:40	25.85	28.49	4.19474	-26.3507	-29.0418
2012-12-12 22:58:40	25.91	28.57	4.20168	-26.4118	-29.1233
2012-12-12 23:08:40	25.94	28.6	4.20863	-26.4424	-29.1539
2012-12-12 23:18:40	25.96	28.6	4.21557	-26.4628	-29.1539	2012-12-12 23:18:40
2012-12-12 23:28:40	26	28.66	4.22252	-26.5036	-29.2151
2012-12-12 23:38:40	26.01	28.67	4.22946	-26.5138	-29.2253
2012-12-12 23:48:40	26.06	28.71	4.23641	-26.5647	-29.2661
2012-12-12 23:58:40	26.1	28.75	4.24335	-26.6055	-29.3068
2012-12-13 00:08:40	26.12	28.77	4.2503	-26.6259	-29.3272
2012-12-13 00:18:40	26.15	28.8	4.25724	-26.6565	-29.3578	2012-12-13 00:18:40
2012-12-13 00:28:40	26.17	28.83	4.26418	-26.6769	-29.3884
2012-12-13 00:38:40	26.2	28.86	4.27113	-26.7074	-29.419
2012-12-13 00:48:40	26.22	28.88	4.27807	-26.7278	-29.4393
2012-12-13 00:58:40	26.26	28.92	4.28502	-26.7686	-29.4801
2012-12-13 01:08:40	26.3	28.95	4.29196	-26.8094	-29.5107
2012-12-13 01:18:40	26.31	28.95	4.29891	-26.8196	-29.5107	2012-12-13 01:18:40
2012-12-13 01:28:40	26.34	28.98	4.30585	-26.8502	-29.5413
2012-12-13 01:38:40	26.33	28.98	4.3128	-26.84	-29.5413
2012-12-13 01:48:40	26.38	29.03	4.31974	-26.8909	-29.5923
2012-12-13 01:58:40	26.38	29.01	4.32668	-26.8909	-29.5719
2012-12-13 02:08:40	26.39	29.04	4.33363	-26.9011	-29.6024
2012-12-13 02:18:40	26.42	29.05	4.34057	-26.9317	-29.6126	2012-12-13 02:18:40
2012-12-13 02:28:40	26.43	29.07	4.34752	-26.9419	-29.633
2012-12-13 02:38:40	26.41	29.06	4.35446	-26.9215	-29.6228
2012-12-13 02:48:40	26.47	29.12	4.36141	-26.9827	-29.684
2012-12-13 02:58:40	26.48	29.13	4.36835	-26.9929	-29.6942
2012-12-13 03:08:40	26.49	29.14	4.3753	-27.0031	-29.7044
2012-12-13 03:18:40	26.21	28.86	4.38224	-26.7176	-29.419	2012-12-13 03:18:40
2012-12-13 03:28:40	26.4	29.05	4.38918	-26.9113	-29.6126
2012-12-13 03:38:40	26.48	29.13	4.39613	-26.9929	-29.6942
2012-12-13 03:48:40	26.51	29.17	4.40307	-27.0234	-29.735
2012-12-13 03:58:40	26.53	29.2	4.41002	-27.0438	-29.7655
2012-12-13 04:08:40	26.57	29.23	4.41696	-27.0846	-29.7961
2012-12-13 04:18:40	26.58	29.23	4.42391	-27.0948	-29.7961	2012-12-13 04:18:40
2012-12-13 04:28:40	26.62	29.28	4.43085	-27.1356	-29.8471
2012-12-13 04:38:40	26.61	29.28	4.4378	-27.1254	-29.8471
2012-12-13 04:48:40	26.68	29.32	4.44474	-27.1967	-29.8879
2012-12-13 04:58:40	26.7	29.35	4.45168	-27.2171	-29.9185
2012-12-13 05:08:40	26.74	29.39	4.45863	-27.2579	-29.9592
2012-12-13 05:18:40	26.75	29.39	4.46557	-27.2681	-29.9592	2012-12-13 05:18:40
2012-12-13 05:28:40	26.74	29.39	4.47252	-27.2579	-29.9592
2012-12-13 05:38:40	26.8	29.44	4.47946	-27.3191	-30.0102
2012-12-13 05:48:40	26.79	29.45	4.48641	-27.3089	-30.0204
2012-12-13 05:58:40	26.84	29.48	4.49335	-27.3598	-30.051
2012-12-13 06:08:40	26.85	29.5	4.5003	-27.37	-30.0714
2012-12-13 06:18:40	26.89	29.54	4.50724	-27.4108	-30.1121	2012-12-13 06:18:40
2012-12-13 06:28:40	26.89	29.54	4.51418	-27.4108	-30.1121
2012-12-13 06:38:40	26.93	29.58	4.52113	-27.4516	-30.1529
2012-12-13 06:48:40	26.95	29.6	4.52807	-27.472	-30.1733
2012-12-13 06:58:40	26.96	29.62	4.53502	-27.4822	-30.1937
2012-12-13 07:08:40	26.99	29.64	4.54196	-27.5127	-30.2141
2012-12-13 07:18:40	27.02	29.66	4.54891	-27.5433	-30.2345	2012-12-13 07:18:40
2012-12-13 07:28:40	27.06	29.72	4.55585	-27.5841	-30.2956
2012-12-13 07:38:40	27.09	29.75	4.5628	-27.6147	-30.3262
2012-12-13 07:48:40	27.12	29.78	4.56974	-27.6453	-30.3568
2012-12-13 07:58:40	27.17	29.8	4.57668	-27.6962	-30.3772
2012-12-13 08:08:40	27.16	29.82	4.58363	-27.686	-30.3976
2012-12-13 08:18:40	27.14	29.78	4.59057	-27.6656	-30.3568	2012-12-13 08:18:40
2012-12-13 08:28:40	27.21	29.85	4.59752	-27.737	-30.4281
2012-12-13 08:38:40	27.24	29.88	4.60446	-27.7676	-30.4587
2012-12-13 08:48:40	27.4	29.89	4.61141	-27.9307	-30.4689
2012-12-13 08:58:40	27.3	29.93	4.61835	-27.8287	-30.5097
2012-12-13 09:08:40	27.35	29.97	4.6253	-27.8797	-30.5505
2012-12-13 09:18:40	27.38	30	4.63224	-27.9103	-30.581	2012-12-13 09:18:40
2012-12-13 09:28:40	27.41	30.01	4.63918	-27.9409	-30.5912
2012-12-13 09:38:40	27.42	30.06	4.64613	-27.9511	-30.6422
2012-12-13 09:48:40	27.43	30.06	4.65307	-27.9613	-30.6422
2012-12-13 09:58:40	27.29	29.94	4.66002	-27.8186	-30.5199
2012-12-13 10:08:40	27.5	30.09	4.66696	-28.0326	-30.6728
2012-12-13 10:18:40	27.51	30.11	4.67391	-28.0428	-30.6932	2012-12-13 10:18:40
2012-12-13 10:28:40	27.54	30.16	4.68085	-28.0734	-30.7441
2012-12-13 10:38:40	27.56	30.16	4.6878	-28.0938	-30.7441
2012-12-13 10:48:40	27.58	30.18	4.69474	-28.1142	-30.7645
2012-12-13 10:58:40	27.61	30.21	4.70168	-28.1448	-30.7951
2012-12-13 11:08:40	27.61	30.22	4.70863	-28.1448	-30.8053
2012-12-13 11:18:40	27.63	30.24	4.71557	-28.1651	-30.8257	2012-12-13 11:18:40
2012-12-13 11:28:40	27.67	30.28	4.72252	-28.2059	-30.8665
2012-12-13 11:38:40	27.69	30.3	4.72946	-28.2263	-30.8869
2012-12-13 11:48:40	27.7	30.29	4.73641	-28.2365	-30.8767
2012-12-13 11:58:40	27.72	30.32	4.74335	-28.2569	-30.9072
2012-12-13 12:08:40	27.7	30.31	4.7503	-28.2365	-30.897
2012-12-13 12:18:40	27.72	30.33	4.75724	-28.2569	-30.9174	2012-12-13 12:18:40
2012-12-13 12:28:40	27.78	30.36	4.76418	-28.318	-30.948
2012-12-13 12:38:40	27.5	30.06	4.77113	-28.0326	-30.6422
2012-12-13 12:48:40	27.58	30.17	4.77807	-28.1142	-30.7543
2012-12-13 12:58:40	27.68	30.26	4.78502	-28.2161	-30.8461
2012-12-13 13:08:40	27.75	30.34	4.79196	-28.2875	-30.9276
2012-12-13 13:18:40	27.77	30.35	4.79891	-28.3078	-30.9378	2012-12-13 13:18:40
2012-12-13 13:28:40	27.82	30.4	4.80585	-28.3588	-30.9888
2012-12-13 13:38:40	27.87	30.45	4.8128	-28.4098	-31.0398
2012-12-13 13:48:40	27.86	30.45	4.81974	-28.3996	-31.0398
2012-12-13 13:58:40	27.47	30.05	4.82668	-28.002	-30.632
2012-12-13 14:08:40	27.63	30.24	4.83363	-28.1651	-30.8257
2012-12-13 14:18:40	27.74	30.34	4.84057	-28.2773	-30.9276	2012-12-13 14:18:40
2012-12-13 14:28:40	27.83	30.45	4.84752	-28.369	-31.0398
2012-12-13 14:38:40	27.87	30.48	4.85446	-28.4098	-31.0703
2012-12-13 14:48:40	27.9	30.5	4.86141	-28.4404	-31.0907
2012-12-13 14:58:40	27.96	30.56	4.86835	-28.5015	-31.1519
2012-12-13 15:08:40	27.98	30.58	4.8753	-28.5219	-31.1723
2012-12-13 15:18:40	28	30.6	4.88224	-28.5423	-31.1927	2012-12-13 15:18:40
2012-12-13 15:28:40	27.98	30.57	4.88918	-28.5219	-31.1621
2012-12-13 15:38:40	28	30.6	4.89613	-28.5423	-31.1927
2012-12-13 15:48:40	28.03	30.63	4.90307	-28.5729	-31.2232
2012-12-13 15:58:40	28.06	30.65	4.91002	-28.6035	-31.2436
2012-12-13 16:08:40	28.1	30.69	4.91696	-28.6442	-31.2844
2012-12-13 16:18:40	28.12	30.73	4.92391	-28.6646	-31.3252	2012-12-13 16:18:40
2012-12-13 16:28:40	28.15	30.74	4.93085	-28.6952	-31.3354
2012-12-13 16:38:40	28.2	30.8	4.9378	-28.7462	-31.3965
2012-12-13 16:48:40	28.23	30.82	4.94474	-28.7768	-31.4169
2012-12-13 16:58:40	28.26	30.86	4.95168	-28.8073	-31.4577
2012-12-13 17:08:40	28.3	30.91	4.95863	-28.8481	-31.5087
2012-12-13 17:18:40	28.34	30.95	4.96557	-28.8889	-31.5494	2012-12-13 17:18:40
2012-12-13 17:28:40	28.38	30.99	4.97252	-28.9297	-31.5902
2012-12-13 17:38:40	28.4	31.01	4.97946	-28.9501	-31.6106
2012-12-13 17:48:40	28.46	31.06	4.98641	-29.0112	-31.6616
2012-12-13 17:58:40	28.49	31.1	4.99335	-29.0418	-31.7023
2012-12-13 18:08:40	28.51	31.1	5.0003	-29.0622	-31.7023
2012-12-13 18:18:40	28.55	31.14	5.00724	-29.103	-31.7431	2012-12-13 18:18:40
2012-12-13 18:28:40	28.56	31.17	5.01418	-29.1131	-31.7737
2012-12-13 18:38:40	28.57	31.19	5.02113	-29.1233	-31.7941
2012-12-13 18:48:40	28.74	31.17	5.02807	-29.2966	-31.7737
2012-12-13 18:58:40	28.68	31.22	5.03502	-29.2355	-31.8247
2012-12-13 19:08:40	28.61	31.22	5.04196	-29.1641	-31.8247
2012-12-13 19:18:40	28.71	31.29	5.04891	-29.2661	-31.896	2012-12-13 19:18:40
2012-12-13 19:28:40	28.71	31.31	5.05585	-29.2661	-31.9164
2012-12-13 19:38:40	28.73	31.36	5.0628	-29.2864	-31.9674
2012-12-13 19:48:40	28.77	31.37	5.06974	-29.3272	-31.9776
2012-12-13 19:58:40	28.82	31.44	5.07668	-29.3782	-32.0489
2012-12-13 20:08:40	28.83	31.45	5.08363	-29.3884	-32.0591
2012-12-13 20:18:40	28.88	31.49	5.09057	-29.4393	-32.0999	2012-12-13 20:18:40
2012-12-13 20:28:40	28.9	31.52	5.09752	-29.4597	-32.1305
2012-12-13 20:38:40	28.93	31.55	5.10446	-29.4903	-32.1611
2012-12-13 20:48:40	28.98	31.6	5.11141	-29.5413	-32.212
2012-12-13 20:58:40	28.97	31.58	5.11835	-29.5311	-32.1916
2012-12-13 21:08:40	29	31.62	5.1253	-29.5617	-32.2324
2012-12-13 21:18:40	29.01	31.63	5.13224	-29.5719	-32.2426	2012-12-13 21:18:40
2012-12-13 21:28:40	29.04	31.66	5.13918	-29.6024	-32.2732
2012-12-13 21:38:40	29.08	31.7	5.14613	-29.6432	-32.314
2012-12-13 21:48:40	29.12	31.73	5.15307	-29.684	-32.3445
2012-12-13 21:58:40	29.15	31.78	5.16002	-29.7146	-32.3955
2012-12-13 22:08:40	29.07	31.72	5.16696	-29.633	-32.3344
2012-12-13 22:18:40	29.15	31.8	5.17391	-29.7146	-32.4159	2012-12-13 22:18:40
2012-12-13 22:28:40	29.22	31.85	5.18085	-29.7859	-32.4669
2012-12-13 22:38:40	29.26	31.89	5.1878	-29.8267	-32.5076
2012-12-13 22:48:40	29.29	31.92	5.19474	-29.8573	-32.5382
2012-12-13 22:58:40	29.32	31.96	5.20168	-29.8879	-32.579
2012-12-13 23:08:40	29.37	32.01	5.20863	-29.9388	-32.63
2012-12-13 23:18:40	29.38	32.03	5.21557	-29.949	-32.6504	2012-12-13 23:18:40
2012-12-13 23:28:40	29.41	32.06	5.22252	-29.9796	-32.6809
2012-12-13 23:38:40	29.41	32.05	5.22946	-29.9796	-32.6707
2012-12-13 23:48:40	29.48	32.12	5.23641	-30.051	-32.7421
2012-12-13 23:58:40	29.54	32.16	5.24335	-30.1121	-32.7829
2012-12-14 00:08:40	29.56	32.19	5.2503	-30.1325	-32.8135
2012-12-14 00:18:40	29.58	32.23	5.25724	-30.1529	-32.8542	2012-12-14 00:18:40
2012-12-14 00:28:40	29.62	32.25	5.26418	-30.1937	-32.8746
2012-12-14 00:38:40	29.66	32.3	5.27113	-30.2345	-32.9256
2012-12-14 00:48:40	29.69	32.32	5.27807	-30.265	-32.946
2012-12-14 00:58:40	29.71	32.34	5.28502	-30.2854	-32.9664
2012-12-14 01:08:40	29.75	32.39	5.29196	-30.3262	-33.0173
2012-12-14 01:18:40	29.79	32.43	5.29891	-30.367	-33.0581	2012-12-14 01:18:40
2012-12-14 01:28:40	29.81	32.45	5.30585	-30.3874	-33.0785
2012-12-14 01:38:40	29.83	32.47	5.3128	-30.4077	-33.0989
2012-12-14 01:48:40	29.88	32.52	5.31974	-30.4587	-33.1498
2012-12-14 01:58:40	29.92	32.55	5.32668	-30.4995	-33.1804
2012-12-14 02:08:40	29.95	32.6	5.33363	-30.5301	-33.2314
2012-12-14 02:18:40	29.97	32.61	5.34057	-30.5505	-33.2416	2012-12-14 02:18:40
2012-12-14 02:28:40	30.03	32.67	5.34752	-30.6116	-33.3028
2012-12-14 02:38:40	30.07	32.72	5.35446	-30.6524	-33.3537
2012-12-14 02:48:40	30.06	32.7	5.36141	-30.6422	-33.3333
2012-12-14 02:58:40	30.11	32.75	5.36835	-30.6932	-33.3843
2012-12-14 03:08:40	30.12	32.77	5.3753	-30.7034	-33.4047
2012-12-14 03:18:40	30.23	32.8	5.38224	-30.8155	-33.4353	2012-12-14 03:18:40
2012-12-14 03:28:40	30.18	32.84	5.38918	-30.7645	-33.476
2012-12-14 03:38:40	30.26	32.89	5.39613	-30.8461	-33.527
2012-12-14 03:48:40	30.25	32.9	5.40307	-30.8359	-33.5372
2012-12-14 03:58:40	30.29	32.93	5.41002	-30.8767	-33.5678
2012-12-14 04:08:40	30.32	32.97	5.41696	-30.9072	-33.6086
2012-12-14 04:18:40	30.35	33	5.42391	-30.9378	-33.6391	2012-12-14 04:18:40
2012-12-14 04:28:40	30.37	33.03	5.43085	-30.9582	-33.6697
2012-12-14 04:38:40	30.42	33.08	5.4378	-31.0092	-33.7207
2012-12-14 04:48:40	30.43	33.09	5.44474	-31.0194	-33.7309
2012-12-14 04:58:40	30.49	33.14	5.45168	-31.0805	-33.7819
2012-12-14 05:08:40	30.53	33.17	5.45863	-31.1213	-33.8124
2012-12-14 05:18:40	30.55	33.19	5.46557	-31.1417	-33.8328	2012-12-14 05:18:40
2012-12-14 05:28:40	30.57	33.23	5.47252	-31.1621	-33.8736
2012-12-14 05:38:40	30.57	33.22	5.47946	-31.1621	-33.8634
2012-12-14 05:48:40	30.56	33.22	5.48641	-31.1519	-33.8634
2012-12-14 05:58:40	30.62	33.28	5.49335	-31.213	-33.9246
2012-12-14 06:08:40	30.65	33.31	5.5003	-31.2436	-33.9551
2012-12-14 06:18:40	30.7	33.35	5.50724	-31.2946	-33.9959	2012-12-14 06:18:40
2012-12-14 06:28:40	30.72	33.38	5.51418	-31.315	-34.0265
2012-12-14 06:38:40	30.75	33.4	5.52113	-31.3456	-34.0469
2012-12-14 06:48:40	30.79	33.43	5.52807	-31.3863	-34.0775
2012-12-14 06:58:40	30.81	33.47	5.53502	-31.4067	-34.1182
2012-12-14 07:08:40	30.83	33.51	5.54196	-31.4271	-34.159
2012-12-14 07:18:40	30.86	33.53	5.54891	-31.4577	-34.1794	2012-12-14 07:18:40
2012-12-14 07:28:40	30.89	33.55	5.55585	-31.4883	-34.1998
2012-12-14 07:38:40	30.9	33.56	5.5628	-31.4985	-34.21
2012-12-14 07:48:40	30.92	33.58	5.56974	-31.5189	-34.2304
2012-12-14 07:58:40	30.95	33.6	5.57668	-31.5494	-34.2508
2012-12-14 08:08:40	30.95	33.62	5.58363	-31.5494	-34.2712
2012-12-14 08:18:40	30.96	33.63	5.59057	-31.5596	-34.2813	2012-12-14 08:18:40
2012-12-14 08:28:40	30.99	33.64	5.59752	-31.5902	-34.2915
2012-12-14 08:38:40	30.99	33.65	5.60446	-31.5902	-34.3017
2012-12-14 08:48:40	31.01	33.66	5.61141	-31.6106	-34.3119
2012-12-14 08:58:40	31.01	33.67	5.61835	-31.6106	-34.3221
2012-12-14 09:08:40	31.08	33.74	5.6253	-31.682	-34.3935
2012-12-14 09:18:40	31.09	33.74	5.63224	-31.6922	-34.3935	2012-12-14 09:18:40
2012-12-14 09:28:40	30.93	33.57	5.63918	-31.5291	-34.2202
2012-12-14 09:38:40	31.09	33.72	5.64613	-31.6922	-34.3731
2012-12-14 09:48:40	31.13	33.76	5.65307	-31.7329	-34.4139
2012-12-14 09:58:40	31.16	33.8	5.66002	-31.7635	-34.4546
2012-12-14 10:08:40	31.21	33.83	5.66696	-31.8145	-34.4852
2012-12-14 10:18:40	31.23	33.86	5.67391	-31.8349	-34.5158	2012-12-14 10:18:40
2012-12-14 10:28:40	31.25	33.89	5.68085	-31.8552	-34.5464
2012-12-14 10:38:40	31.27	33.89	5.6878	-31.8756	-34.5464
2012-12-14 10:48:40	31.32	33.94	5.69474	-31.9266	-34.5973
2012-12-14 10:58:40	31.37	33.99	5.70168	-31.9776	-34.6483
2012-12-14 11:08:40	31.38	34.02	5.70863	-31.9878	-34.6789
2012-12-14 11:18:40	31.39	34.02	5.71557	-31.998	-34.6789	2012-12-14 11:18:40
2012-12-14 11:28:40	31.44	34.09	5.72252	-32.0489	-34.7503
2012-12-14 11:38:40	31.48	34.1	5.72946	-32.0897	-34.7604
2012-12-14 11:48:40	31.49	34.13	5.73641	-32.0999	-34.791
2012-12-14 11:58:40	31.48	34.14	5.74335	-32.0897	-34.8012
2012-12-14 12:08:40	31.54	34.17	5.7503	-32.1509	-34.8318
2012-12-14 12:18:40	31.55	34.18	5.75724	-32.1611	-34.842	2012-12-14 12:18:40
2012-12-14 12:28:40	31.6	34.23	5.76418	-32.212	-34.893
2012-12-14 12:38:40	31.61	34.24	5.77113	-32.2222	-34.9032
2012-12-14 12:48:40	31.61	34.23	5.77807	-32.2222	-34.893
2012-12-14 12:58:40	31.67	34.3	5.78502	-32.2834	-34.9643
2012-12-14 13:08:40	31.68	34.32	5.79196	-32.2936	-34.9847
2012-12-14 13:18:40	31.73	34.35	5.79891	-32.3445	-35.0153	2012-12-14 13:18:40
2012-12-14 13:28:40	31.75	34.38	5.80585	-32.3649	-35.0459
2012-12-14 13:38:40	31.79	34.43	5.8128	-32.4057	-35.0968
2012-12-14 13:48:40	31.81	34.46	5.81974	-32.4261	-35.1274
2012-12-14 13:58:40	31.84	34.47	5.82668	-32.4567	-35.1376
2012-12-14 14:08:40	31.89	34.51	5.83363	-32.5076	-35.1784
2012-12-14 14:18:40	31.92	34.56	5.84057	-32.5382	-35.2294	2012-12-14 14:18:40
2012-12-14 14:28:40	31.97	34.59	5.84752	-32.5892	-35.2599
2012-12-14 14:38:40	31.99	34.61	5.85446	-32.6096	-35.2803
2012-12-14 14:48:40	32.01	34.65	5.86141	-32.63	-35.3211
2012-12-14 14:58:40	32.03	34.66	5.86835	-32.6504	-35.3313
2012-12-14 15:08:40	32.07	34.71	5.8753	-32.6911	-35.3823
2012-12-14 15:18:40	32.12	34.75	5.88224	-32.7421	-35.423	2012-12-14 15:18:40
2012-12-14 15:28:40	32.15	34.78	5.88918	-32.7727	-35.4536
2012-12-14 15:38:40	32.21	34.82	5.89613	-32.8338	-35.4944
2012-12-14 15:48:40	32.23	34.86	5.90307	-32.8542	-35.5352
2012-12-14 15:58:40	32.26	34.89	5.91002	-32.8848	-35.5657
2012-12-14 16:08:40	32.3	34.92	5.91696	-32.9256	-35.5963
2012-12-14 16:18:40	32.34	34.96	5.92391	-32.9664	-35.6371	2012-12-14 16:18:40
2012-12-14 16:28:40	32.38	35.01	5.93085	-33.0071	-35.6881
2012-12-14 16:38:40	32.39	35.02	5.9378	-33.0173	-35.6983
2012-12-14 16:48:40	32.43	35.04	5.94474	-33.0581	-35.7187
2012-12-14 16:58:40	32.46	35.08	5.95168	-33.0887	-35.7594
2012-12-14 17:08:40	32.49	35.11	5.95863	-33.1193	-35.79
2012-12-14 17:18:40	32.51	35.14	5.96557	-33.1397	-35.8206	2012-12-14 17:18:40
2012-12-14 17:28:40	32.54	35.16	5.97252	-33.1702	-35.841
2012-12-14 17:38:40	32.62	35.22	5.97946	-33.2518	-35.9021
2012-12-14 17:48:40	32.63	35.26	5.98641	-33.262	-35.9429
2012-12-14 17:58:40	32.67	35.27	5.99335	-33.3028	-35.9531
2012-12-14 18:08:40	32.71	35.34	6.0003	-33.3435	-36.0245
2012-12-14 18:18:40	32.74	35.36	6.00724	-33.3741	-36.0449	2012-12-14 18:18:40
2012-12-14 18:28:40	32.77	35.39	6.01418	-33.4047	-36.0754
2012-12-14 18:38:40	32.72	35.29	6.02113	-33.3537	-35.9735
2012-12-14 18:48:40	32.81	35.41	6.02807	-33.4455	-36.0958
2012-12-14 18:58:40	32.88	35.51	6.03502	-33.5168	-36.1978
2012-12-14 19:08:40	32.88	35.51	6.04196	-33.5168	-36.1978
2012-12-14 19:18:40	32.97	35.59	6.04891	-33.6086	-36.2793	2012-12-14 19:18:40
2012-12-14 19:28:40	33.01	35.61	6.05585	-33.6493	-36.2997
2012-12-14 19:38:40	33.06	35.68	6.0628	-33.7003	-36.371
2012-12-14 19:48:40	33.14	35.75	6.06974	-33.7819	-36.4424
2012-12-14 19:58:40	33.17	35.8	6.07668	-33.8124	-36.4934
2012-12-14 20:08:40	33.09	35.72	6.08363	-33.7309	-36.4118
2012-12-14 20:18:40	33.22	35.82	6.09057	-33.8634	-36.5138	2012-12-14 20:18:40
2012-12-14 20:28:40	33.24	35.87	6.09752	-33.8838	-36.5647
2012-12-14 20:38:40	33.28	35.89	6.10446	-33.9246	-36.5851
2012-12-14 20:48:40	33.3	35.9	6.11141	-33.945	-36.5953
2012-12-14 20:58:40	33.33	35.93	6.11835	-33.9755	-36.6259
2012-12-14 21:08:40	33.38	35.98	6.1253	-34.0265	-36.6769
2012-12-14 21:18:40	33.4	36	6.13224	-34.0469	-36.6972	2012-12-14 21:18:40
2012-12-14 21:28:40	33.42	36.02	6.13918	-34.0673	-36.7176
2012-12-14 21:38:40	33.46	36.06	6.14613	-34.1081	-36.7584
2012-12-14 21:48:40	33.51	36.12	6.15307	-34.159	-36.8196
2012-12-14 21:58:40	33.54	36.15	6.16002	-34.1896	-36.8502
2012-12-14 22:08:40	33.58	36.18	6.16696	-34.2304	-36.8807
2012-12-14 22:18:40	33.58	36.2	6.17391	-34.2304	-36.9011	2012-12-14 22:18:40
2012-12-14 22:28:40	33.65	36.25	6.18085	-34.3017	-36.9521
2012-12-14 22:38:40	33.67	36.28	6.1878	-34.3221	-36.9827
2012-12-14 22:48:40	33.7	36.32	6.19474	-34.3527	-37.0234
2012-12-14 22:58:40	33.75	36.35	6.20168	-34.4037	-37.054
2012-12-14 23:08:40	33.79	36.39	6.20863	-34.4444	-37.0948
2012-12-14 23:18:40	33.81	36.41	6.21557	-34.4648	-37.1152	2012-12-14 23:18:40
2012-12-14 23:28:40	33.84	36.45	6.22252	-34.4954	-37.156
2012-12-14 23:38:40	33.9	36.5	6.22946	-34.5566	-37.2069
2012-12-14 23:48:40	33.93	36.54	6.23641	-34.5872	-37.2477
2012-12-14 23:58:40	33.97	36.59	6.24335	-34.6279	-37.2987
2012-12-15 00:08:40	34.01	36.62	6.2503	-34.6687	-37.3293
2012-12-15 00:18:40	34.02	36.63	6.25724	-34.6789	-37.3394	2012-12-15 00:18:40
2012-12-15 00:28:40	34.07	36.69	6.26418	-34.7299	-37.4006
2012-12-15 00:38:40	34.1	36.72	6.27113	-34.7604	-37.4312
2012-12-15 00:48:40	34.15	36.75	6.27807	-34.8114	-37.4618
2012-12-15 00:58:40	34.16	36.78	6.28502	-34.8216	-37.4924
2012-12-15 01:08:40	34.2	36.81	6.29196	-34.8624	-37.5229
2012-12-15 01:18:40	34.23	36.85	6.29891	-34.893	-37.5637	2012-12-15 01:18:40
2012-12-15 01:28:40	34.26	36.89	6.30585	-34.9235	-37.6045
2012-12-15 01:38:40	34.28	36.9	6.3128	-34.9439	-37.6147
2012-12-15 01:48:40	34.32	36.95	6.31974	-34.9847	-37.6656
2012-12-15 01:58:40	34.37	36.98	6.32668	-35.0357	-37.6962
2012-12-15 02:08:40	34.41	37.03	6.33363	-35.0765	-37.7472
2012-12-15 02:18:40	34.42	37.04	6.34057	-35.0866	-37.7574	2012-12-15 02:18:40
2012-12-15 02:28:40	34.45	37.07	6.34752	-35.1172	-37.788
2012-12-15 02:38:40	34.51	37.14	6.35446	-35.1784	-37.8593
2012-12-15 02:48:40	34.54	37.17	6.36141	-35.209	-37.8899
2012-12-15 02:58:40	34.58	37.21	6.36835	-35.2497	-37.9307
2012-12-15 03:08:40	34.63	37.25	6.3753	-35.3007	-37.9715
2012-12-15 03:18:40	34.66	37.28	6.38224	-35.3313	-38.002	2012-12-15 03:18:40
2012-12-15 03:28:40	34.71	37.33	6.38918	-35.3823	-38.053
2012-12-15 03:38:40	34.71	37.34	6.39613	-35.3823	-38.0632
2012-12-15 03:48:40	34.74	37.35	6.40307	-35.4128	-38.0734
2012-12-15 03:58:40	34.77	37.39	6.41002	-35.4434	-38.1142
2012-12-15 04:08:40	34.81	37.42	6.41696	-35.4842	-38.1448
2012-12-15 04:18:40	34.84	37.46	6.42391	-35.5148	-38.1855	2012-12-15 04:18:40
2012-12-15 04:28:40	34.87	37.48	6.43085	-35.5454	-38.2059
2012-12-15 04:38:40	34.91	37.53	6.4378	-35.5861	-38.2569
2012-12-15 04:48:40	34.96	37.59	6.44474	-35.6371	-38.318
2012-12-15 04:58:40	34.99	37.61	6.45168	-35.6677	-38.3384
2012-12-15 05:08:40	35.04	37.66	6.45863	-35.7187	-38.3894
2012-12-15 05:18:40	35.08	37.69	6.46557	-35.7594	-38.42	2012-12-15 05:18:40
2012-12-15 05:28:40	35.11	37.72	6.47252	-35.79	-38.4506
2012-12-15 05:38:40	35.13	37.75	6.47946	-35.8104	-38.4811
2012-12-15 05:48:40	35.16	37.78	6.48641	-35.841	-38.5117
2012-12-15 05:58:40	35.18	37.81	6.49335	-35.8614	-38.5423
2012-12-15 06:08:40	35.22	37.84	6.5003	-35.9021	-38.5729
2012-12-15 06:18:40	35.25	37.86	6.50724	-35.9327	-38.5933	2012-12-15 06:18:40
2012-12-15 06:28:40	35.28	37.91	6.51418	-35.9633	-38.6442
2012-12-15 06:38:40	35.32	37.93	6.52113	-36.0041	-38.6646
2012-12-15 06:48:40	35.33	37.97	6.52807	-36.0143	-38.7054
2012-12-15 06:58:40	35.35	37.99	6.53502	-36.0347	-38.7258
2012-12-15 07:08:40	35.37	38	6.54196	-36.055	-38.736
2012-12-15 07:18:40	35.39	38.01	6.54891	-36.0754	-38.7462	2012-12-15 07:18:40
2012-12-15 07:28:40	35.4	38.03	6.55585	-36.0856	-38.7666
2012-12-15 07:38:40	35.45	38.06	6.5628	-36.1366	-38.7971
2012-12-15 07:48:40	35.48	38.12	6.56974	-36.1672	-38.8583
2012-12-15 07:58:40	35.51	38.15	6.57668	-36.1978	-38.8889
2012-12-15 08:08:40	35.54	38.18	6.58363	-36.2283	-38.9195
2012-12-15 08:18:40	35.56	38.2	6.59057	-36.2487	-38.9399	2012-12-15 08:18:40
2012-12-15 08:28:40	35.6	38.23	6.59752	-36.2895	-38.9704
2012-12-15 08:38:40	35.63	38.26	6.60446	-36.3201	-39.001
2012-12-15 08:48:40	35.65	38.27	6.61141	-36.3405	-39.0112
2012-12-15 08:58:40	35.69	38.31	6.61835	-36.3812	-39.052
2012-12-15 09:08:40	35.71	38.34	6.6253	-36.4016	-39.0826
2012-12-15 09:18:40	35.74	38.36	6.63224	-36.4322	-39.103	2012-12-15 09:18:40
2012-12-15 09:28:40	35.76	38.38	6.63918	-36.4526	-39.1233
2012-12-15 09:38:40	35.8	38.42	6.64613	-36.4934	-39.1641
2012-12-15 09:48:40	35.84	38.46	6.65307	-36.5341	-39.2049
2012-12-15 09:58:40	35.87	38.49	6.66002	-36.5647	-39.2355
2012-12-15 10:08:40	35.91	38.52	6.66696	-36.6055	-39.2661
2012-12-15 10:18:40	35.94	38.57	6.67391	-36.6361	-39.317	2012-12-15 10:18:40
2012-12-15 10:28:40	35.97	38.59	6.68085	-36.6667	-39.3374
2012-12-15 10:38:40	36.01	38.63	6.6878	-36.7074	-39.3782
2012-12-15 10:48:40	36.03	38.65	6.69474	-36.7278	-39.3986
2012-12-15 10:58:40	36.03	38.65	6.70168	-36.7278	-39.3986
2012-12-15 11:08:40	36.08	38.69	6.70863	-36.7788	-39.4393
2012-12-15 11:18:40	36.07	38.69	6.71557	-36.7686	-39.4393	2012-12-15 11:18:40
2012-12-15 11:28:40	36.13	38.76	6.72252	-36.8298	-39.5107
2012-12-15 11:38:40	36.06	38.68	6.72946	-36.7584	-39.4292
2012-12-15 11:48:40	35.96	38.58	6.73641	-36.6565	-39.3272
2012-12-15 11:58:40	36.12	38.74	6.74335	-36.8196	-39.4903
2012-12-15 12:08:40	36.17	38.78	6.7503	-36.8705	-39.5311
2012-12-15 12:18:40	36.23	38.83	6.75724	-36.9317	-39.5821	2012-12-15 12:18:40
2012-12-15 12:28:40	36.26	38.87	6.76418	-36.9623	-39.6228
2012-12-15 12:38:40	36.3	38.91	6.77113	-37.0031	-39.6636
2012-12-15 12:48:40	36.33	38.92	6.77807	-37.0336	-39.6738
2012-12-15 12:58:40	36.35	38.95	6.78502	-37.054	-39.7044
2012-12-15 13:08:40	36.39	39	6.79196	-37.0948	-39.7554
2012-12-15 13:18:40	36.43	39.03	6.79891	-37.1356	-39.7859	2012-12-15 13:18:40
2012-12-15 13:28:40	36.45	39.06	6.80585	-37.156	-39.8165
2012-12-15 13:38:40	36.49	39.09	6.8128	-37.1967	-39.8471
2012-12-15 13:48:40	36.53	39.14	6.81974	-37.2375	-39.8981
2012-12-15 13:58:40	36.56	39.17	6.82668	-37.2681	-39.9286
2012-12-15 14:08:40	36.59	39.2	6.83363	-37.2987	-39.9592
2012-12-15 14:18:40	36.64	39.23	6.84057	-37.3496	-39.9898	2012-12-15 14:18:40
2012-12-15 14:28:40	36.67	39.26	6.84752	-37.3802	-40.0204
2012-12-15 14:38:40	36.71	39.3	6.85446	-37.421	-40.0612
2012-12-15 14:48:40	36.76	39.35	6.86141	-37.472	-40.1121
2012-12-15 14:58:40	36.79	39.39	6.86835	-37.5025	-40.1529
2012-12-15 15:08:40	36.81	39.42	6.8753	-37.5229	-40.1835
2012-12-15 15:18:40	36.86	39.47	6.88224	-37.5739	-40.2345	2012-12-15 15:18:40
2012-12-15 15:28:40	36.9	39.49	6.88918	-37.6147	-40.2548
2012-12-15 15:38:40	36.95	39.54	6.89613	-37.6656	-40.3058
2012-12-15 15:48:40	36.98	39.59	6.90307	-37.6962	-40.3568
2012-12-15 15:58:40	37.02	39.62	6.91002	-37.737	-40.3874
2012-12-15 16:08:40	37.07	39.67	6.91696	-37.788	-40.4383
2012-12-15 16:18:40	37.08	39.67	6.92391	-37.7982	-40.4383	2012-12-15 16:18:40
2012-12-15 16:28:40	37.14	39.73	6.93085	-37.8593	-40.4995
2012-12-15 16:38:40	37.16	39.75	6.9378	-37.8797	-40.5199
2012-12-15 16:48:40	37.19	39.8	6.94474	-37.9103	-40.5708
2012-12-15 16:58:40	37.24	39.85	6.95168	-37.9613	-40.6218
2012-12-15 17:08:40	37.27	39.87	6.95863	-37.9918	-40.6422
2012-12-15 17:18:40	37.3	39.92	6.96557	-38.0224	-40.6932	2012-12-15 17:18:40
2012-12-15 17:28:40	37.37	39.96	6.97252	-38.0938	-40.7339
2012-12-15 17:38:40	37.39	40	6.97946	-38.1142	-40.7747
2012-12-15 17:48:40	37.41	40.02	6.98641	-38.1346	-40.7951
2012-12-15 17:58:40	37.46	40.05	6.99335	-38.1855	-40.8257
2012-12-15 18:08:40	37.49	40.09	7.0003	-38.2161	-40.8665
2012-12-15 18:18:40	37.54	40.13	7.00724	-38.2671	-40.9072	2012-12-15 18:18:40
2012-12-15 18:28:40	37.56	40.15	7.01418	-38.2875	-40.9276
2012-12-15 18:38:40	37.62	40.22	7.02113	-38.3486	-40.999
2012-12-15 18:48:40	37.63	40.23	7.02807	-38.3588	-41.0092
2012-12-15 18:58:40	37.68	40.27	7.03502	-38.4098	-41.0499
2012-12-15 19:08:40	37.69	40.28	7.04196	-38.42	-41.0601
2012-12-15 19:18:40	37.72	40.32	7.04891	-38.4506	-41.1009	2012-12-15 19:18:40
2012-12-15 19:28:40	37.77	40.36	7.05585	-38.5015	-41.1417
2012-12-15 19:38:40	37.78	40.38	7.0628	-38.5117	-41.1621
2012-12-15 19:48:40	37.83	40.44	7.06974	-38.5627	-41.2232
2012-12-15 19:58:40	37.87	40.48	7.07668	-38.6035	-41.264
2012-12-15 20:08:40	37.94	40.53	7.08363	-38.6748	-41.315
2012-12-15 20:18:40	37.98	40.58	7.09057	-38.7156	-41.366	2012-12-15 20:18:40
2012-12-15 20:28:40	38.02	40.61	7.09752	-38.7564	-41.3965
2012-12-15 20:38:40	38.04	40.63	7.10446	-38.7768	-41.4169
2012-12-15 20:48:40	38.1	40.69	7.11141	-38.8379	-41.4781
2012-12-15 20:58:40	38.14	40.73	7.11835	-38.8787	-41.5189
2012-12-15 21:08:40	38.17	40.76	7.1253	-38.9093	-41.5494
2012-12-15 21:18:40	38.22	40.82	7.13224	-38.9602	-41.6106	2012-12-15 21:18:40
2012-12-15 21:28:40	38.27	40.87	7.13918	-39.0112	-41.6616
2012-12-15 21:38:40	38.3	40.9	7.14613	-39.0418	-41.6922
2012-12-15 21:48:40	38.36	40.95	7.15307	-39.103	-41.7431
2012-12-15 21:58:40	38.39	40.99	7.16002	-39.1335	-41.7839
2012-12-15 22:08:40	38.42	41.02	7.16696	-39.1641	-41.8145
2012-12-15 22:18:40	38.49	41.08	7.17391	-39.2355	-41.8756	2012-12-15 22:18:40
2012-12-15 22:28:40	38.5	41.09	7.18085	-39.2457	-41.8858
2012-12-15 22:38:40	38.55	41.14	7.1878	-39.2966	-41.9368
2012-12-15 22:48:40	38.59	41.17	7.19474	-39.3374	-41.9674
2012-12-15 22:58:40	38.63	41.23	7.20168	-39.3782	-42.0285
2012-12-15 23:08:40	38.67	41.27	7.20863	-39.419	-42.0693
2012-12-15 23:18:40	38.71	41.3	7.21557	-39.4597	-42.0999	2012-12-15 23:18:40
2012-12-15 23:28:40	38.76	41.35	7.22252	-39.5107	-42.1509
2012-12-15 23:38:40	38.79	41.4	7.22946	-39.5413	-42.2018
2012-12-15 23:48:40	38.84	41.45	7.23641	-39.5923	-42.2528
2012-12-15 23:58:40	38.88	41.47	7.24335	-39.633	-42.2732
2012-12-16 00:08:40	38.9	41.5	7.2503	-39.6534	-42.3038
2012-12-16 00:18:40	38.93	41.51	7.25724	-39.684	-42.314	2012-12-16 00:18:40
2012-12-16 00:28:40	38.96	41.56	7.26418	-39.7146	-42.3649
2012-12-16 00:38:40	39.01	41.6	7.27113	-39.7655	-42.4057
2012-12-16 00:48:40	39.06	41.65	7.27807	-39.8165	-42.4567
2012-12-16 00:58:40	39.1	41.7	7.28502	-39.8573	-42.5076
2012-12-16 01:08:40	39.15	41.75	7.29196	-39.9083	-42.5586
2012-12-16 01:18:40	39.18	41.78	7.29891	-39.9388	-42.5892	2012-12-16 01:18:40
2012-12-16 01:28:40	39.23	41.83	7.30585	-39.9898	-42.6402
2012-12-16 01:38:40	39.28	41.88	7.3128	-40.0408	-42.6911
2012-12-16 01:48:40	39.32	41.91	7.31974	-40.0815	-42.7217
2012-12-16 01:58:40	39.36	41.96	7.32668	-40.1223	-42.7727
2012-12-16 02:08:40	39.41	42	7.33363	-40.1733	-42.8135
2012-12-16 02:18:40	39.47	42.04	7.34057	-40.2345	-42.8542	2012-12-16 02:18:40
2012-12-16 02:28:40	39.49	42.1	7.34752	-40.2548	-42.9154
2012-12-16 02:38:40	39.54	42.15	7.35446	-40.3058	-42.9664
2012-12-16 02:48:40	39.57	42.18	7.36141	-40.3364	-42.9969
2012-12-16 02:58:40	39.6	42.19	7.36835	-40.367	-43.0071
2012-12-16 03:08:40	39.64	42.25	7.3753	-40.4077	-43.0683
2012-12-16 03:18:40	39.69	42.29	7.38224	-40.4587	-43.1091	2012-12-16 03:18:40
2012-12-16 03:28:40	39.73	42.32	7.38918	-40.4995	-43.1397
2012-12-16 03:38:40	39.77	42.38	7.39613	-40.5403	-43.2008
2012-12-16 03:48:40	39.81	42.41	7.40307	-40.581	-43.2314
2012-12-16 03:58:40	39.85	42.46	7.41002	-40.6218	-43.2824
2012-12-16 04:08:40	39.89	42.5	7.41696	-40.6626	-43.3231
2012-12-16 04:18:40	39.93	42.53	7.42391	-40.7034	-43.3537	2012-12-16 04:18:40
2012-12-16 04:28:40	39.99	42.59	7.43085	-40.7645	-43.4149
2012-12-16 04:38:40	40.05	42.64	7.4378	-40.8257	-43.4659
2012-12-16 04:48:40	40.08	42.68	7.44474	-40.8563	-43.5066
2012-12-16 04:58:40	40.12	42.72	7.45168	-40.897	-43.5474
2012-12-16 05:08:40	40.17	42.78	7.45863	-40.948	-43.6086
2012-12-16 05:18:40	40.19	42.8	7.46557	-40.9684	-43.629	2012-12-16 05:18:40
2012-12-16 05:28:40	40.22	42.83	7.47252	-40.999	-43.6595
2012-12-16 05:38:40	40.29	42.89	7.47946	-41.0703	-43.7207
2012-12-16 05:48:40	40.31	42.9	7.48641	-41.0907	-43.7309
2012-12-16 05:58:40	40.38	42.99	7.49335	-41.1621	-43.8226
2012-12-16 06:08:40	40.41	43	7.5003	-41.1927	-43.8328
2012-12-16 06:18:40	40.45	43.06	7.50724	-41.2334	-43.894	2012-12-16 06:18:40
2012-12-16 06:28:40	40.51	43.11	7.51418	-41.2946	-43.945
2012-12-16 06:38:40	40.58	43.17	7.52113	-41.366	-44.0061
2012-12-16 06:48:40	40.64	43.23	7.52807	-41.4271	-44.0673
2012-12-16 06:58:40	40.68	43.29	7.53502	-41.4679	-44.1284
2012-12-16 07:08:40	40.72	43.3	7.54196	-41.5087	-44.1386
2012-12-16 07:18:40	40.77	43.37	7.54891	-41.5596	-44.21	2012-12-16 07:18:40
2012-12-16 07:28:40	40.8	43.39	7.55585	-41.5902	-44.2304
2012-12-16 07:38:40	40.85	43.46	7.5628	-41.6412	-44.3017
2012-12-16 07:48:40	40.91	43.51	7.56974	-41.7023	-44.3527
2012-12-16 07:58:40	40.96	43.56	7.57668	-41.7533	-44.4037
2012-12-16 08:08:40	41	43.6	7.58363	-41.7941	-44.4444
2012-12-16 08:18:40	41.05	43.65	7.59057	-41.8451	-44.4954	2012-12-16 08:18:40
2012-12-16 08:28:40	41.08	43.67	7.59752	-41.8756	-44.5158
2012-12-16 08:38:40	41.12	43.71	7.60446	-41.9164	-44.5566
2012-12-16 08:48:40	41.15	43.75	7.61141	-41.947	-44.5973
2012-12-16 08:58:40	41.18	43.78	7.61835	-41.9776	-44.6279
2012-12-16 09:08:40	41.24	43.83	7.6253	-42.0387	-44.6789
2012-12-16 09:18:40	41.26	43.86	7.63224	-42.0591	-44.7095	2012-12-16 09:18:40
2012-12-16 09:28:40	41.28	43.89	7.63918	-42.0795	-44.7401
2012-12-16 09:38:40	41.35	43.96	7.64613	-42.1509	-44.8114
2012-12-16 09:48:40	41.41	44.01	7.65307	-42.212	-44.8624
2012-12-16 09:58:40	41.44	43.98	7.66002	-42.2426	-44.8318
2012-12-16 10:08:40	41.48	44.08	7.66696	-42.2834	-44.9337
2012-12-16 10:18:40	41.52	44.12	7.67391	-42.3242	-44.9745	2012-12-16 10:18:40
2012-12-16 10:28:40	41.57	44.17	7.68085	-42.3751	-45.0255
2012-12-16 10:38:40	41.61	44.22	7.6878	-42.4159	-45.0765
2012-12-16 10:48:40	41.65	44.25	7.69474	-42.4567	-45.107
2012-12-16 10:58:40	41.71	44.31	7.70168	-42.5178	-45.1682
2012-12-16 11:08:40	41.74	44.34	7.70863	-42.5484	-45.1988
2012-12-16 11:18:40	41.78	44.38	7.71557	-42.5892	-45.2396	2012-12-16 11:18:40
2012-12-16 11:28:40	41.83	44.42	7.72252	-42.6402	-45.2803
2012-12-16 11:38:40	41.88	44.49	7.72946	-42.6911	-45.3517
2012-12-16 11:48:40	41.92	44.52	7.73641	-42.7319	-45.3823
2012-12-16 11:58:40	41.94	44.55	7.74335	-42.7523	-45.4128
2012-12-16 12:08:40	42.01	44.61	7.7503	-42.8236	-45.474
2012-12-16 12:18:40	42.05	44.66	7.75724	-42.8644	-45.525	2012-12-16 12:18:40
2012-12-16 12:28:40	42.11	44.7	7.76418	-42.9256	-45.5657
2012-12-16 12:38:40	42.14	44.75	7.77113	-42.9562	-45.6167
2012-12-16 12:48:40	42.19	44.79	7.77807	-43.0071	-45.6575
2012-12-16 12:58:40	42.24	44.84	7.78502	-43.0581	-45.7085
2012-12-16 13:08:40	42.28	44.87	7.79196	-43.0989	-45.739
2012-12-16 13:18:40	42.33	44.93	7.79891	-43.1498	-45.8002	2012-12-16 13:18:40
2012-12-16 13:28:40	42.37	44.98	7.80585	-43.1906	-45.8512
2012-12-16 13:38:40	42.43	45.03	7.8128	-43.2518	-45.9021
2012-12-16 13:48:40	42.47	45.06	7.81974	-43.2926	-45.9327
2012-12-16 13:58:40	42.54	45.14	7.82668	-43.3639	-46.0143
2012-12-16 14:08:40	42.59	45.19	7.83363	-43.4149	-46.0652
2012-12-16 14:18:40	42.63	45.24	7.84057	-43.4557	-46.1162	2012-12-16 14:18:40
2012-12-16 14:28:40	42.67	45.28	7.84752	-43.4964	-46.157
2012-12-16 14:38:40	42.7	45.32	7.85446	-43.527	-46.1978
2012-12-16 14:48:40	42.78	45.38	7.86141	-43.6086	-46.2589
2012-12-16 14:58:40	42.83	45.44	7.86835	-43.6595	-46.3201
2012-12-16 15:08:40	42.89	45.5	7.8753	-43.7207	-46.3812
2012-12-16 15:18:40	42.92	45.53	7.88224	-43.7513	-46.4118	2012-12-16 15:18:40
2012-12-16 15:28:40	42.94	45.57	7.88918	-43.7717	-46.4526
2012-12-16 15:38:40	42.99	45.62	7.89613	-43.8226	-46.5036
2012-12-16 15:48:40	43.05	45.66	7.90307	-43.8838	-46.5443
2012-12-16 15:58:40	43.1	45.72	7.91002	-43.9348	-46.6055
2012-12-16 16:08:40	43.12	45.74	7.91696	-43.9551	-46.6259
2012-12-16 16:18:40	43.18	45.79	7.92391	-44.0163	-46.6769	2012-12-16 16:18:40
2012-12-16 16:28:40	43.23	45.85	7.93085	-44.0673	-46.738
2012-12-16 16:38:40	43.27	45.89	7.9378	-44.1081	-46.7788
2012-12-16 16:48:40	43.34	45.96	7.94474	-44.1794	-46.8502
2012-12-16 16:58:40	43.4	46.01	7.95168	-44.2406	-46.9011
2012-12-16 17:08:40	43.45	46.07	7.95863	-44.2915	-46.9623
2012-12-16 17:18:40	43.52	46.12	7.96557	-44.3629	-47.0133	2012-12-16 17:18:40
2012-12-16 17:28:40	43.56	46.19	7.97252	-44.4037	-47.0846
2012-12-16 17:38:40	43.6	46.22	7.97946	-44.4444	-47.1152
2012-12-16 17:48:40	43.66	46.28	7.98641	-44.5056	-47.1764
2012-12-16 17:58:40	43.7	46.31	7.99335	-44.5464	-47.2069
2012-12-16 18:08:40	43.77	46.38	8.0003	-44.6177	-47.2783
2012-12-16 18:18:40	43.75	46.39	8.00724	-44.5973	-47.2885	2012-12-16 18:18:40
2012-12-16 18:28:40	43.87	46.48	8.01418	-44.7197	-47.3802
2012-12-16 18:38:40	43.93	46.54	8.02113	-44.7808	-47.4414
2012-12-16 18:48:40	43.98	46.58	8.02807	-44.8318	-47.4822
2012-12-16 18:58:40	44.03	46.64	8.03502	-44.8828	-47.5433
2012-12-16 19:08:40	44.08	46.7	8.04196	-44.9337	-47.6045
2012-12-16 19:18:40	44.15	46.77	8.04891	-45.0051	-47.6758	2012-12-16 19:18:40
2012-12-16 19:28:40	44.21	46.82	8.05585	-45.0663	-47.7268
2012-12-16 19:38:40	44.27	46.88	8.0628	-45.1274	-47.788
2012-12-16 19:48:40	44.31	46.92	8.06974	-45.1682	-47.8287
2012-12-16 19:58:40	44.35	46.98	8.07668	-45.209	-47.8899
2012-12-16 20:08:40	44.42	47.02	8.08363	-45.2803	-47.9307
2012-12-16 20:18:40	44.47	47.09	8.09057	-45.3313	-48.002	2012-12-16 20:18:40
2012-12-16 20:28:40	44.52	47.14	8.09752	-45.3823	-48.053
2012-12-16 20:38:40	44.6	47.22	8.10446	-45.4638	-48.1346
2012-12-16 20:48:40	44.66	47.27	8.11141	-45.525	-48.1855
2012-12-16 20:58:40	44.71	47.33	8.11835	-45.5759	-48.2467
2012-12-16 21:08:40	44.77	47.39	8.1253	-45.6371	-48.3078
2012-12-16 21:18:40	44.84	47.46	8.13224	-45.7085	-48.3792	2012-12-16 21:18:40
2012-12-16 21:28:40	44.89	47.51	8.13918	-45.7594	-48.4302
2012-12-16 21:38:40	44.98	47.59	8.14613	-45.8512	-48.5117
2012-12-16 21:48:40	45.02	47.64	8.15307	-45.8919	-48.5627
2012-12-16 21:58:40	45.05	47.66	8.16002	-45.9225	-48.5831
2012-12-16 22:08:40	45.11	47.74	8.16696	-45.9837	-48.6646
2012-12-16 22:18:40	45.19	47.81	8.17391	-46.0652	-48.736	2012-12-16 22:18:40
2012-12-16 22:28:40	45.24	47.86	8.18085	-46.1162	-48.787
2012-12-16 22:38:40	45.29	47.91	8.1878	-46.1672	-48.8379
2012-12-16 22:48:40	45.38	48	8.19474	-46.2589	-48.9297
2012-12-16 22:58:40	45.43	48.04	8.20168	-46.3099	-48.9704
2012-12-16 23:08:40	45.49	48.1	8.20863	-46.371	-49.0316
2012-12-16 23:18:40	45.53	48.16	8.21557	-46.4118	-49.0928	2012-12-16 23:18:40
2012-12-16 23:28:40	45.61	48.22	8.22252	-46.4934	-49.1539
2012-12-16 23:38:40	45.64	48.28	8.22946	-46.524	-49.2151
2012-12-16 23:48:40	45.7	48.32	8.23641	-46.5851	-49.2559
2012-12-16 23:58:40	45.77	48.4	8.24335	-46.6565	-49.3374
2012-12-17 00:08:40	45.82	48.45	8.2503	-46.7074	-49.3884
2012-12-17 00:18:40	45.89	48.51	8.25724	-46.7788	-49.4495	2012-12-17 00:18:40
2012-12-17 00:28:40	45.98	48.62	8.26418	-46.8705	-49.5617
2012-12-17 00:38:40	46.02	48.64	8.27113	-46.9113	-49.5821
2012-12-17 00:48:40	46.1	48.72	8.27807	-46.9929	-49.6636
2012-12-17 00:58:40	46.15	48.77	8.28502	-47.0438	-49.7146
2012-12-17 01:08:40	46.21	48.83	8.29196	-47.105	-49.7757
2012-12-17 01:18:40	46.27	48.9	8.29891	-47.1662	-49.8471	2012-12-17 01:18:40
2012-12-17 01:28:40	46.33	48.96	8.30585	-47.2273	-49.9083
2012-12-17 01:38:40	46.38	49.01	8.3128	-47.2783	-49.9592
2012-12-17 01:48:40	46.46	49.09	8.31974	-47.3598	-50.0408
2012-12-17 01:58:40	46.51	49.13	8.32668	-47.4108	-50.0815
2012-12-17 02:08:40	46.58	49.21	8.33363	-47.4822	-50.1631
2012-12-17 02:18:40	46.62	49.25	8.34057	-47.5229	-50.2039	2012-12-17 02:18:40
2012-12-17 02:28:40	46.68	49.31	8.34752	-47.5841	-50.265
2012-12-17 02:38:40	46.75	49.38	8.35446	-47.6555	-50.3364
2012-12-17 02:48:40	46.81	49.42	8.36141	-47.7166	-50.3772
2012-12-17 02:58:40	46.86	49.49	8.36835	-47.7676	-50.4485
2012-12-17 03:08:40	46.9	49.52	8.3753	-47.8084	-50.4791
2012-12-17 03:18:40	46.97	49.6	8.38224	-47.8797	-50.5607	2012-12-17 03:18:40
2012-12-17 03:28:40	47.04	49.67	8.38918	-47.9511	-50.632
2012-12-17 03:38:40	47.11	49.74	8.39613	-48.0224	-50.7034
2012-12-17 03:48:40	47.18	49.8	8.40307	-48.0938	-50.7645
2012-12-17 03:58:40	47.22	49.83	8.41002	-48.1346	-50.7951
2012-12-17 04:08:40	47.29	49.92	8.41696	-48.2059	-50.8869
2012-12-17 04:18:40	47.34	49.97	8.42391	-48.2569	-50.9378	2012-12-17 04:18:40
2012-12-17 04:28:40	47.41	50.03	8.43085	-48.3282	-50.999
2012-12-17 04:38:40	47.44	50.07	8.4378	-48.3588	-51.0398
2012-12-17 04:48:40	47.48	50.11	8.44474	-48.3996	-51.0805
2012-12-17 04:58:40	47.55	50.19	8.45168	-48.4709	-51.1621
2012-12-17 05:08:40	47.59	50.22	8.45863	-48.5117	-51.1927
2012-12-17 05:18:40	47.66	50.27	8.46557	-48.5831	-51.2436	2012-12-17 05:18:40
2012-12-17 05:28:40	47.68	50.31	8.47252	-48.6035	-51.2844
2012-12-17 05:38:40	47.76	50.39	8.47946	-48.685	-51.366
2012-12-17 05:48:40	47.83	50.46	8.48641	-48.7564	-51.4373
2012-12-17 05:58:40	47.88	50.51	8.49335	-48.8073	-51.4883
2012-12-17 06:08:40	47.97	50.6	8.5003	-48.8991	-51.58
2012-12-17 06:18:40	48.02	50.65	8.50724	-48.9501	-51.631	2012-12-17 06:18:40
2012-12-17 06:28:40	48.09	50.72	8.51418	-49.0214	-51.7023
2012-12-17 06:38:40	48.16	50.79	8.52113	-49.0928	-51.7737
2012-12-17 06:48:40	48.22	50.85	8.52807	-49.1539	-51.8349
2012-12-17 06:58:40	48.28	50.91	8.53502	-49.2151	-51.896
2012-12-17 07:08:40	48.34	50.97	8.54196	-49.2762	-51.9572
2012-12-17 07:18:40	48.37	51.01	8.54891	-49.3068	-51.998	2012-12-17 07:18:40
2012-12-17 07:28:40	48.45	51.08	8.55585	-49.3884	-52.0693
2012-12-17 07:38:40	48.5	51.13	8.5628	-49.4393	-52.1203
2012-12-17 07:48:40	48.57	51.2	8.56974	-49.5107	-52.1916
2012-12-17 07:58:40	48.65	51.29	8.57668	-49.5923	-52.2834
2012-12-17 08:08:40	48.74	51.36	8.58363	-49.684	-52.3547
2012-12-17 08:18:40	48.78	51.4	8.59057	-49.7248	-52.3955	2012-12-17 08:18:40
2012-12-17 08:28:40	48.86	51.47	8.59752	-49.8063	-52.4669
2012-12-17 08:38:40	48.92	51.55	8.60446	-49.8675	-52.5484
2012-12-17 08:48:40	48.99	51.62	8.61141	-49.9388	-52.6198
2012-12-17 08:58:40	49.04	51.68	8.61835	-49.9898	-52.6809
2012-12-17 09:08:40	48.97	51.58	8.6253	-49.9185	-52.579
2012-12-17 09:18:40	49.15	51.75	8.63224	-50.1019	-52.7523	2012-12-17 09:18:40
2012-12-17 09:28:40	49.22	51.84	8.63918	-50.1733	-52.844
2012-12-17 09:38:40	49.29	51.91	8.64613	-50.2446	-52.9154
2012-12-17 09:48:40	49.37	51.98	8.65307	-50.3262	-52.9867
2012-12-17 09:58:40	49.45	52.05	8.66002	-50.4077	-53.0581
2012-12-17 10:08:40	49.49	52.11	8.66696	-50.4485	-53.1193
2012-12-17 10:18:40	49.61	51.22	8.67391	-50.5708	-52.212	2012-12-17 10:18:40
2012-12-17 10:28:40	49.08	51.75	8.68085	-50.0306	-52.7523
2012-12-17 10:38:40	49.49	52.13	8.6878	-50.4485	-53.1397
2012-12-17 10:48:40	49.65	52.28	8.69474	-50.6116	-53.2926
2012-12-17 10:58:40	49.81	52.42	8.70168	-50.7747	-53.4353
2012-12-17 11:08:40	49.96	52.58	8.70863	-50.9276	-53.5984
2012-12-17 11:18:40	50.11	52.72	8.71557	-51.0805	-53.7411	2012-12-17 11:18:40
2012-12-17 11:28:40	49.95	52.53	8.72252	-50.9174	-53.5474
2012-12-17 11:38:40	50.14	52.74	8.72946	-51.1111	-53.7615
2012-12-17 11:48:40	50.25	52.86	8.73641	-51.2232	-53.8838
2012-12-17 11:58:40	50.39	52.98	8.74335	-51.366	-54.0061
2012-12-17 12:08:40	50.52	53.11	8.7503	-51.4985	-54.1386
2012-12-17 12:18:40	50.62	53.23	8.75724	-51.6004	-54.261	2012-12-17 12:18:40
2012-12-17 12:28:40	50.69	53.3	8.76418	-51.6718	-54.3323
2012-12-17 12:38:40	50.85	53.44	8.77113	-51.8349	-54.475
2012-12-17 12:48:40	50.94	53.55	8.77807	-51.9266	-54.5872
2012-12-17 12:58:40	51.03	53.64	8.78502	-52.0183	-54.6789
2012-12-17 13:08:40	51.15	53.75	8.79196	-52.1407	-54.791
2012-12-17 13:18:40	51.26	53.85	8.79891	-52.2528	-54.893	2012-12-17 13:18:40
2012-12-17 13:28:40	51.36	53.95	8.80585	-52.3547	-54.9949
2012-12-17 13:38:40	51.43	54.03	8.8128	-52.4261	-55.0765
2012-12-17 13:48:40	51.52	54.14	8.81974	-52.5178	-55.1886
2012-12-17 13:58:40	51.63	54.25	8.82668	-52.63	-55.3007
2012-12-17 14:08:40	51.73	54.34	8.83363	-52.7319	-55.3925
2012-12-17 14:18:40	51.84	54.45	8.84057	-52.844	-55.5046	2012-12-17 14:18:40
2012-12-17 14:28:40	51.93	54.54	8.84752	-52.9358	-55.5963
2012-12-17 14:38:40	52.04	54.63	8.85446	-53.0479	-55.6881
2012-12-17 14:48:40	52.09	54.71	8.86141	-53.0989	-55.7696
2012-12-17 14:58:40	52.2	54.8	8.86835	-53.211	-55.8614
2012-12-17 15:08:40	52.28	54.91	8.8753	-53.2926	-55.9735
2012-12-17 15:18:40	52.38	55	8.88224	-53.3945	-56.0652	2012-12-17 15:18:40
2012-12-17 15:28:40	52.48	55.09	8.88918	-53.4964	-56.157
2012-12-17 15:38:40	52.58	55.19	8.89613	-53.5984	-56.2589
2012-12-17 15:48:40	52.66	55.28	8.90307	-53.6799	-56.3507
2012-12-17 15:58:40	52.77	55.38	8.91002	-53.792	-56.4526
2012-12-17 16:08:40	52.89	55.49	8.91696	-53.9144	-56.5647
2012-12-17 16:18:40	52.97	55.59	8.92391	-53.9959	-56.6667	2012-12-17 16:18:40
2012-12-17 16:28:40	53.07	55.68	8.93085	-54.0979	-56.7584
2012-12-17 16:38:40	53.19	55.79	8.9378	-54.2202	-56.8705
2012-12-17 16:48:40	53.28	55.88	8.94474	-54.3119	-56.9623
2012-12-17 16:58:40	53.38	55.99	8.95168	-54.4139	-57.0744
2012-12-17 17:08:40	53.47	56.07	8.95863	-54.5056	-57.156
2012-12-17 17:18:40	53.59	56.2	8.96557	-54.6279	-57.2885	2012-12-17 17:18:40
2012-12-17 17:28:40	53.69	56.3	8.97252	-54.7299	-57.3904
2012-12-17 17:38:40	53.79	56.39	8.97946	-54.8318	-57.4822
2012-12-17 17:48:40	53.9	56.51	8.98641	-54.9439	-57.6045
2012-12-17 17:58:40	53.98	56.6	8.99335	-55.0255	-57.6962
2012-12-17 18:08:40	54.09	56.7	9.0003	-55.1376	-57.7982
2012-12-17 18:18:40	54.18	56.81	9.00724	-55.2294	-57.9103	2012-12-17 18:18:40
2012-12-17 18:28:40	54.3	56.92	9.01418	-55.3517	-58.0224
2012-12-17 18:38:40	54.38	57	9.02113	-55.4332	-58.104
2012-12-17 18:48:40	54.5	57.12	9.02807	-55.5556	-58.2263
2012-12-17 18:58:40	54.62	57.23	9.03502	-55.6779	-58.3384
2012-12-17 19:08:40	54.72	57.33	9.04196	-55.7798	-58.4404
2012-12-17 19:18:40	54.82	57.45	9.04891	-55.8818	-58.5627	2012-12-17 19:18:40
2012-12-17 19:28:40	54.9	57.51	9.05585	-55.9633	-58.6239
2012-12-17 19:38:40	55.01	57.63	9.0628	-56.0754	-58.7462
2012-12-17 19:48:40	55.13	57.74	9.06974	-56.1978	-58.8583
2012-12-17 19:58:40	55.23	57.85	9.07668	-56.2997	-58.9704
2012-12-17 20:08:40	55.35	57.97	9.08363	-56.422	-59.0928
2012-12-17 20:18:40	55.44	58.07	9.09057	-56.5138	-59.1947	2012-12-17 20:18:40
2012-12-17 20:28:40	55.56	58.19	9.09752	-56.6361	-59.317
2012-12-17 20:38:40	55.68	58.29	9.10446	-56.7584	-59.419
2012-12-17 20:48:40	55.78	58.41	9.11141	-56.8603	-59.5413
2012-12-17 20:58:40	55.88	58.5	9.11835	-56.9623	-59.633
2012-12-17 21:08:40	55.98	58.61	9.1253	-57.0642	-59.7452
2012-12-17 21:18:40	56.1	58.72	9.13224	-57.1865	-59.8573	2012-12-17 21:18:40
2012-12-17 21:28:40	56.21	58.83	9.13918	-57.2987	-59.9694
2012-12-17 21:38:40	56.3	58.92	9.14613	-57.3904	-60.0612
2012-12-17 21:48:40	56.38	59.03	9.15307	-57.472	-60.1733
2012-12-17 21:58:40	56.51	59.14	9.16002	-57.6045	-60.2854
2012-12-17 22:08:40	56.64	59.27	9.16696	-57.737	-60.4179
2012-12-17 22:18:40	56.76	59.39	9.17391	-57.8593	-60.5403	2012-12-17 22:18:40
2012-12-17 22:28:40	56.86	59.49	9.18085	-57.9613	-60.6422
2012-12-17 22:38:40	56.97	59.6	9.1878	-58.0734	-60.7543
2012-12-17 22:48:40	57.13	59.74	9.19474	-58.2365	-60.897
2012-12-17 22:58:40	57.23	59.85	9.20168	-58.3384	-61.0092
2012-12-17 23:08:40	57.33	59.94	9.20863	-58.4404	-61.1009
2012-12-17 23:18:40	57.41	60.04	9.21557	-58.5219	-61.2029	2012-12-17 23:18:40
2012-12-17 23:28:40	57.55	60.18	9.22252	-58.6646	-61.3456
2012-12-17 23:38:40	57.66	60.3	9.22946	-58.7768	-61.4679
2012-12-17 23:48:40	57.78	60.39	9.23641	-58.8991	-61.5596
2012-12-17 23:58:40	57.88	60.5	9.24335	-59.001	-61.6718
2012-12-18 00:08:40	58.02	60.63	9.2503	-59.1437	-61.8043
2012-12-18 00:18:40	58.11	60.74	9.25724	-59.2355	-61.9164	2012-12-18 00:18:40
2012-12-18 00:28:40	58.24	60.87	9.26418	-59.368	-62.0489
2012-12-18 00:38:40	58.35	60.99	9.27113	-59.4801	-62.1713
2012-12-18 00:48:40	58.48	61.12	9.27807	-59.6126	-62.3038
2012-12-18 00:58:40	58.59	61.21	9.28502	-59.7248	-62.3955
2012-12-18 01:08:40	58.69	61.31	9.29196	-59.8267	-62.4975
2012-12-18 01:18:40	58.82	61.45	9.29891	-59.9592	-62.6402	2012-12-18 01:18:40
2012-12-18 01:28:40	58.94	61.56	9.30585	-60.0815	-62.7523
2012-12-18 01:38:40	59.04	61.68	9.3128	-60.1835	-62.8746
2012-12-18 01:48:40	59.16	61.79	9.31974	-60.3058	-62.9867
2012-12-18 01:58:40	59.28	61.92	9.32668	-60.4281	-63.1193
2012-12-18 02:08:40	59.42	62.06	9.33363	-60.5708	-63.262
2012-12-18 02:18:40	59.56	62.19	9.34057	-60.7136	-63.3945	2012-12-18 02:18:40
2012-12-18 02:28:40	59.67	62.3	9.34752	-60.8257	-63.5066
2012-12-18 02:38:40	59.82	62.4	9.35446	-60.9786	-63.6086
2012-12-18 02:48:40	59.91	62.54	9.36141	-61.0703	-63.7513
2012-12-18 02:58:40	60.03	62.67	9.36835	-61.1927	-63.8838
2012-12-18 03:08:40	60.14	62.78	9.3753	-61.3048	-63.9959
2012-12-18 03:18:40	60.27	62.91	9.38224	-61.4373	-64.1284	2012-12-18 03:18:40
2012-12-18 03:28:40	60.38	63.02	9.38918	-61.5494	-64.2406
2012-12-18 03:38:40	60.5	63.14	9.39613	-61.6718	-64.3629
2012-12-18 03:48:40	60.65	63.29	9.40307	-61.8247	-64.5158
2012-12-18 03:58:40	60.76	63.4	9.41002	-61.9368	-64.6279
2012-12-18 04:08:40	60.87	63.52	9.41696	-62.0489	-64.7503
2012-12-18 04:18:40	61.01	63.66	9.42391	-62.1916	-64.893	2012-12-18 04:18:40
2012-12-18 04:28:40	61.14	63.79	9.43085	-62.3242	-65.0255
2012-12-18 04:38:40	61.25	63.89	9.4378	-62.4363	-65.1274
2012-12-18 04:48:40	61.36	63.99	9.44474	-62.5484	-65.2294
2012-12-18 04:58:40	61.47	64.11	9.45168	-62.6606	-65.3517
2012-12-18 05:08:40	61.61	64.24	9.45863	-62.8033	-65.4842
2012-12-18 05:18:40	61.74	64.38	9.46557	-62.9358	-65.6269	2012-12-18 05:18:40
2012-12-18 05:28:40	61.84	64.5	9.47252	-63.0377	-65.7492
2012-12-18 05:38:40	61.99	64.63	9.47946	-63.1906	-65.8818
2012-12-18 05:48:40	62.11	64.75	9.48641	-63.3129	-66.0041
2012-12-18 05:58:40	62.25	64.89	9.49335	-63.4557	-66.1468
2012-12-18 06:08:40	62.37	65	9.5003	-63.578	-66.2589
2012-12-18 06:18:40	62.48	65.12	9.50724	-63.6901	-66.3812	2012-12-18 06:18:40
2012-12-18 06:28:40	62.61	65.27	9.51418	-63.8226	-66.5341
2012-12-18 06:38:40	62.74	65.39	9.52113	-63.9551	-66.6565
2012-12-18 06:48:40	62.86	65.5	9.52807	-64.0775	-66.7686
2012-12-18 06:58:40	62.99	65.64	9.53502	-64.21	-66.9113
2012-12-18 07:08:40	63.11	65.76	9.54196	-64.3323	-67.0336
2012-12-18 07:18:40	63.24	65.87	9.54891	-64.4648	-67.1458	2012-12-18 07:18:40
2012-12-18 07:28:40	63.33	65.97	9.55585	-64.5566	-67.2477
2012-12-18 07:38:40	63.46	66.08	9.5628	-64.6891	-67.3598
2012-12-18 07:48:40	63.58	66.24	9.56974	-64.8114	-67.5229
2012-12-18 07:58:40	63.7	66.36	9.57668	-64.9337	-67.6453
2012-12-18 08:08:40	63.84	66.48	9.58363	-65.0765	-67.7676
2012-12-18 08:18:40	63.95	66.6	9.59057	-65.1886	-67.8899	2012-12-18 08:18:40
2012-12-18 08:28:40	63.88	66.57	9.59752	-65.1172	-67.8593
2012-12-18 08:38:40	64	66.61	9.60446	-65.2396	-67.9001
2012-12-18 08:48:40	64.16	66.81	9.61141	-65.4027	-68.104
2012-12-18 08:58:40	64.27	66.92	9.61835	-65.5148	-68.2161
2012-12-18 09:08:40	64.4	67.05	9.6253	-65.6473	-68.3486
2012-12-18 09:18:40	64.52	67.17	9.63224	-65.7696	-68.4709	2012-12-18 09:18:40
2012-12-18 09:28:40	64.62	67.27	9.63918	-65.8716	-68.5729
2012-12-18 09:38:40	64.74	67.38	9.64613	-65.9939	-68.685
2012-12-18 09:48:40	64.83	67.48	9.65307	-66.0856	-68.787
2012-12-18 09:58:40	64.96	67.6	9.66002	-66.2181	-68.9093
2012-12-18 10:08:40	65.07	67.7	9.66696	-66.3303	-69.0112
2012-12-18 10:18:40	65.2	67.85	9.67391	-66.4628	-69.1641	2012-12-18 10:18:40
2012-12-18 10:28:40	65.32	67.97	9.68085	-66.5851	-69.2864
2012-12-18 10:38:40	65.42	68.07	9.6878	-66.6871	-69.3884
2012-12-18 10:48:40	65.56	68.19	9.69474	-66.8298	-69.5107
2012-12-18 10:58:40	65.68	68.33	9.70168	-66.9521	-69.6534
2012-12-18 11:08:40	65.83	68.48	9.70863	-67.105	-69.8063
2012-12-18 11:18:40	65.93	68.58	9.71557	-67.2069	-69.9083	2012-12-18 11:18:40
2012-12-18 11:28:40	66.08	68.72	9.72252	-67.3598	-70.051
2012-12-18 11:38:40	66.21	68.85	9.72946	-67.4924	-70.1835
2012-12-18 11:48:40	66.33	68.97	9.73641	-67.6147	-70.3058
2012-12-18 11:58:40	66.47	69.11	9.74335	-67.7574	-70.4485
2012-12-18 12:08:40	66.59	69.23	9.7503	-67.8797	-70.5708
2012-12-18 12:18:40	66.73	69.37	9.75724	-68.0224	-70.7136	2012-12-18 12:18:40
2012-12-18 12:28:40	66.85	69.5	9.76418	-68.1448	-70.8461
2012-12-18 12:38:40	66.98	69.62	9.77113	-68.2773	-70.9684
2012-12-18 12:48:40	67.1	69.76	9.77807	-68.3996	-71.1111
2012-12-18 12:58:40	67.26	69.9	9.78502	-68.5627	-71.2538
2012-12-18 13:08:40	67.4	70.04	9.79196	-68.7054	-71.3965
2012-12-18 13:18:40	67.52	70.18	9.79891	-68.8277	-71.5392	2012-12-18 13:18:40
2012-12-18 13:28:40	67.65	70.29	9.80585	-68.9602	-71.6514
2012-12-18 13:38:40	67.78	70.43	9.8128	-69.0928	-71.7941
2012-12-18 13:48:40	67.91	70.55	9.81974	-69.2253	-71.9164
2012-12-18 13:58:40	68.02	70.66	9.82668	-69.3374	-72.0285
2012-12-18 14:08:40	68.12	70.76	9.83363	-69.4393	-72.1305
2012-12-18 14:18:40	68.22	70.85	9.84057	-69.5413	-72.2222	2012-12-18 14:18:40
2012-12-18 14:28:40	68.34	70.99	9.84752	-69.6636	-72.3649
2012-12-18 14:38:40	68.51	71.16	9.85446	-69.8369	-72.5382
2012-12-18 14:48:40	68.63	71.29	9.86141	-69.9592	-72.6707
2012-12-18 14:58:40	68.79	71.44	9.86835	-70.1223	-72.8236
2012-12-18 15:08:40	68.94	71.6	9.8753	-70.2752	-72.9867
2012-12-18 15:18:40	69.08	71.72	9.88224	-70.4179	-73.1091	2012-12-18 15:18:40
2012-12-18 15:28:40	69.21	71.86	9.88918	-70.5505	-73.2518
2012-12-18 15:38:40	69.31	71.98	9.89613	-70.6524	-73.3741
2012-12-18 15:48:40	69.46	72.11	9.90307	-70.8053	-73.5066
2012-12-18 15:58:40	69.61	72.27	9.91002	-70.9582	-73.6697
2012-12-18 16:08:40	69.75	72.39	9.91696	-71.1009	-73.792
2012-12-18 16:18:40	69.87	72.54	9.92391	-71.2232	-73.945	2012-12-18 16:18:40
2012-12-18 16:28:40	70.01	72.65	9.93085	-71.366	-74.0571
2012-12-18 16:38:40	68.95	71.63	9.9378	-70.2854	-73.0173
2012-12-18 16:48:40	69.43	72.11	9.94474	-70.7747	-73.5066
2012-12-18 16:58:40	69.79	72.45	9.95168	-71.1417	-73.8532
2012-12-18 17:08:40	70.01	72.69	9.95863	-71.366	-74.0979
2012-12-18 17:18:40	70.21	72.89	9.96557	-71.5698	-74.3017	2012-12-18 17:18:40
2012-12-18 17:28:40	70.39	73.07	9.97252	-71.7533	-74.4852
2012-12-18 17:38:40	70.53	73.21	9.97946	-71.896	-74.6279
2012-12-18 17:48:40	70.68	73.35	9.98641	-72.0489	-74.7706
2012-12-18 17:58:40	70.84	73.52	9.99335	-72.212	-74.9439
2012-12-18 18:08:40	70.99	73.68	10.0003	-72.3649	-75.107
2012-12-18 18:18:40	71.14	73.83	10.0072	-72.5178	-75.2599	2012-12-18 18:18:40
2012-12-18 18:28:40	71.29	73.98	10.0142	-72.6707	-75.4128
2012-12-18 18:38:40	71.44	74.13	10.0211	-72.8236	-75.5657
2012-12-18 18:48:40	71.6	74.29	10.0281	-72.9867	-75.7288
2012-12-18 18:58:40	71.78	74.46	10.035	-73.1702	-75.9021
2012-12-18 19:08:40	71.93	74.61	10.042	-73.3231	-76.055
2012-12-18 19:18:40	72.11	74.77	10.0489	-73.5066	-76.2181	2012-12-18 19:18:40
2012-12-18 19:28:40	72.24	74.93	10.0559	-73.6391	-76.3812
2012-12-18 19:38:40	72.41	75.1	10.0628	-73.8124	-76.5545
2012-12-18 19:48:40	72.57	75.25	10.0697	-73.9755	-76.7074
2012-12-18 19:58:40	72.72	75.41	10.0767	-74.1284	-76.8705
2012-12-18 20:08:40	72.86	75.56	10.0836	-74.2712	-77.0234
2012-12-18 20:18:40	73.03	75.73	10.0906	-74.4444	-77.1967	2012-12-18 20:18:40
2012-12-18 20:28:40	73.2	75.88	10.0975	-74.6177	-77.3496
2012-12-18 20:38:40	73.34	76.05	10.1045	-74.7604	-77.5229
2012-12-18 20:48:40	73.53	76.22	10.1114	-74.9541	-77.6962
2012-12-18 20:58:40	73.67	76.36	10.1184	-75.0968	-77.8389
2012-12-18 21:08:40	73.84	76.54	10.1253	-75.2701	-78.0224
2012-12-18 21:18:40	74.01	76.71	10.1322	-75.4434	-78.1957	2012-12-18 21:18:40
2012-12-18 21:28:40	74.17	76.85	10.1392	-75.6065	-78.3384
2012-12-18 21:38:40	74.33	77.04	10.1461	-75.7696	-78.5321
2012-12-18 21:48:40	74.48	77.19	10.1531	-75.9225	-78.685
2012-12-18 21:58:40	74.66	77.35	10.16	-76.106	-78.8481
2012-12-18 22:08:40	74.81	77.49	10.167	-76.2589	-78.9908
2012-12-18 22:18:40	74.98	77.66	10.1739	-76.4322	-79.1641	2012-12-18 22:18:40
2012-12-18 22:28:40	75.12	77.81	10.1809	-76.5749	-79.317
2012-12-18 22:38:40	75.27	77.97	10.1878	-76.7278	-79.4801
2012-12-18 22:48:40	75.42	78.12	10.1947	-76.8807	-79.633
2012-12-18 22:58:40	75.57	78.27	10.2017	-77.0336	-79.7859
2012-12-18 23:08:40	75.74	78.43	10.2086	-77.2069	-79.949
2012-12-18 23:18:40	75.9	78.6	10.2156	-77.37	-80.1223	2012-12-18 23:18:40
2012-12-18 23:28:40	76.03	78.72	10.2225	-77.5025	-80.2446
2012-12-18 23:38:40	76.17	78.86	10.2295	-77.6453	-80.3874
2012-12-18 23:48:40	76.34	79.04	10.2364	-77.8186	-80.5708
2012-12-18 23:58:40	76.51	79.22	10.2434	-77.9918	-80.7543
2012-12-19 00:08:40	76.68	79.39	10.2503	-78.1651	-80.9276
2012-12-19 00:18:40	76.86	79.54	10.2572	-78.3486	-81.0805	2012-12-19 00:18:40
2012-12-19 00:28:40	77	79.71	10.2642	-78.4913	-81.2538
2012-12-19 00:38:40	77.15	79.85	10.2711	-78.6442	-81.3965
2012-12-19 00:48:40	77.34	80.01	10.2781	-78.8379	-81.5596
2012-12-19 00:58:40	77.49	80.2	10.285	-78.9908	-81.7533
2012-12-19 01:08:40	77.63	80.35	10.292	-79.1335	-81.9062
2012-12-19 01:18:40	77.79	80.52	10.2989	-79.2966	-82.0795	2012-12-19 01:18:40
2012-12-19 01:28:40	77.96	80.67	10.3059	-79.4699	-82.2324
2012-12-19 01:38:40	78.12	80.83	10.3128	-79.633	-82.3955
2012-12-19 01:48:40	78.25	80.97	10.3197	-79.7655	-82.5382
2012-12-19 01:58:40	78.38	81.11	10.3267	-79.8981	-82.6809
2012-12-19 02:08:40	78.53	81.26	10.3336	-80.051	-82.8338
2012-12-19 02:18:40	78.7	81.43	10.3406	-80.2243	-83.0071	2012-12-19 02:18:40
2012-12-19 02:28:40	78.87	81.6	10.3475	-80.3976	-83.1804
2012-12-19 02:38:40	79.03	81.77	10.3545	-80.5607	-83.3537
2012-12-19 02:48:40	79.21	81.93	10.3614	-80.7441	-83.5168
2012-12-19 02:58:40	79.39	82.09	10.3684	-80.9276	-83.6799
2012-12-19 03:08:40	79.54	82.27	10.3753	-81.0805	-83.8634
2012-12-19 03:18:40	79.72	82.45	10.3822	-81.264	-84.0469	2012-12-19 03:18:40
2012-12-19 03:28:40	79.88	82.61	10.3892	-81.4271	-84.21
2012-12-19 03:38:40	80.04	82.77	10.3961	-81.5902	-84.3731
2012-12-19 03:48:40	80.16	82.92	10.4031	-81.7125	-84.526
2012-12-19 03:58:40	80.32	83.08	10.41	-81.8756	-84.6891
2012-12-19 04:08:40	80.51	83.24	10.417	-82.0693	-84.8522
2012-12-19 04:18:40	80.67	83.42	10.4239	-82.2324	-85.0357	2012-12-19 04:18:40
2012-12-19 04:28:40	80.83	83.59	10.4309	-82.3955	-85.209
2012-12-19 04:38:40	81	83.71	10.4378	-82.5688	-85.3313
2012-12-19 04:48:40	81.16	83.9	10.4447	-82.7319	-85.525
2012-12-19 04:58:40	81.34	84.1	10.4517	-82.9154	-85.7288
2012-12-19 05:08:40	81.53	84.25	10.4586	-83.1091	-85.8818
2012-12-19 05:18:40	81.7	84.44	10.4656	-83.2824	-86.0754	2012-12-19 05:18:40
2012-12-19 05:28:40	81.87	84.6	10.4725	-83.4557	-86.2385
2012-12-19 05:38:40	82.02	84.76	10.4795	-83.6086	-86.4016
2012-12-19 05:48:40	82.19	84.93	10.4864	-83.7819	-86.5749
2012-12-19 05:58:40	82.38	85.12	10.4934	-83.9755	-86.7686
2012-12-19 06:08:40	82.53	85.29	10.5003	-84.1284	-86.9419
2012-12-19 06:18:40	82.74	85.48	10.5072	-84.3425	-87.1356	2012-12-19 06:18:40
2012-12-19 06:28:40	82.9	85.63	10.5142	-84.5056	-87.2885
2012-12-19 06:38:40	83.08	85.83	10.5211	-84.6891	-87.4924
2012-12-19 06:48:40	83.26	86	10.5281	-84.8726	-87.6656
2012-12-19 06:58:40	83.44	86.19	10.535	-85.0561	-87.8593
2012-12-19 07:08:40	83.61	86.36	10.542	-85.2294	-88.0326
2012-12-19 07:18:40	83.79	86.55	10.5489	-85.4128	-88.2263	2012-12-19 07:18:40
2012-12-19 07:28:40	83.97	86.73	10.5559	-85.5963	-88.4098
2012-12-19 07:38:40	84.16	86.92	10.5628	-85.79	-88.6035
2012-12-19 07:48:40	84.28	87.04	10.5697	-85.9123	-88.7258
2012-12-19 07:58:40	84.47	87.2	10.5767	-86.106	-88.8889
2012-12-19 08:08:40	84.67	87.42	10.5836	-86.3099	-89.1131
2012-12-19 08:18:40	84.57	87.32	10.5906	-86.208	-89.0112	2012-12-19 08:18:40
2012-12-19 08:28:40	84.83	87.58	10.5975	-86.473	-89.2762
2012-12-19 08:38:40	85.01	87.74	10.6045	-86.6565	-89.4393
2012-12-19 08:48:40	85.17	87.93	10.6114	-86.8196	-89.633
2012-12-19 08:58:40	85.35	88.11	10.6184	-87.0031	-89.8165
2012-12-19 09:08:40	85.52	88.28	10.6253	-87.1764	-89.9898
2012-12-19 09:18:40	85.76	88.45	10.6322	-87.421	-90.1631	2012-12-19 09:18:40
2012-12-19 09:28:40	85.94	88.62	10.6392	-87.6045	-90.3364
2012-12-19 09:38:40	86.06	88.81	10.6461	-87.7268	-90.5301
2012-12-19 09:48:40	86.57	88.98	10.6531	-88.2467	-90.7034
2012-12-19 09:58:40	86.8	89.16	10.66	-88.4811	-90.8869
2012-12-19 10:08:40	87.1	89.36	10.667	-88.787	-91.0907
2012-12-19 10:18:40	87.01	89.52	10.6739	-88.6952	-91.2538	2012-12-19 10:18:40
2012-12-19 10:28:40	86.95	89.72	10.6809	-88.634	-91.4577
2012-12-19 10:38:40	87.16	89.91	10.6878	-88.8481	-91.6514
2012-12-19 10:48:40	87.32	90.09	10.6947	-89.0112	-91.8349
2012-12-19 10:58:40	87.49	90.28	10.7017	-89.1845	-92.0285
2012-12-19 11:08:40	87.69	90.45	10.7086	-89.3884	-92.2018
2012-12-19 11:18:40	87.87	90.62	10.7156	-89.5719	-92.3751	2012-12-19 11:18:40
2012-12-19 11:28:40	88.04	90.8	10.7225	-89.7452	-92.5586
2012-12-19 11:38:40	88.25	91.03	10.7295	-89.9592	-92.7931
2012-12-19 11:48:40	88.45	91.22	10.7364	-90.1631	-92.9867
2012-12-19 11:58:40	88.67	91.39	10.7434	-90.3874	-93.16
2012-12-19 12:08:40	88.8	91.57	10.7503	-90.5199	-93.3435
2012-12-19 12:18:40	89.06	91.79	10.7572	-90.7849	-93.5678	2012-12-19 12:18:40
2012-12-19 12:28:40	89.22	92.01	10.7642	-90.948	-93.792
2012-12-19 12:38:40	89.41	92.19	10.7711	-91.1417	-93.9755
2012-12-19 12:48:40	89.61	92.39	10.7781	-91.3456	-94.1794
2012-12-19 12:58:40	89.79	92.57	10.785	-91.5291	-94.3629
2012-12-19 13:08:40	90.02	92.79	10.792	-91.7635	-94.5872
2012-12-19 13:18:40	90.2	92.98	10.7989	-91.947	-94.7808	2012-12-19 13:18:40
2012-12-19 13:28:40	90.42	93.21	10.8059	-92.1713	-95.0153
2012-12-19 13:38:40	90.61	93.41	10.8128	-92.3649	-95.2192
2012-12-19 13:48:40	90.81	93.59	10.8197	-92.5688	-95.4027
2012-12-19 13:58:40	91.02	93.8	10.8267	-92.7829	-95.6167
2012-12-19 14:08:40	91.17	93.96	10.8336	-92.9358	-95.7798
2012-12-19 14:18:40	91.38	94.16	10.8406	-93.1498	-95.9837	2012-12-19 14:18:40
2012-12-19 14:28:40	91.58	94.37	10.8475	-93.3537	-96.1978
2012-12-19 14:38:40	91.78	94.56	10.8545	-93.5576	-96.3914
2012-12-19 14:48:40	91.97	94.79	10.8614	-93.7513	-96.6259
2012-12-19 14:58:40	92.17	94.96	10.8684	-93.9551	-96.7992
2012-12-19 15:08:40	92.37	95.16	10.8753	-94.159	-97.0031
2012-12-19 15:18:40	92.57	95.36	10.8822	-94.3629	-97.2069	2012-12-19 15:18:40
2012-12-19 15:28:40	92.78	95.58	10.8892	-94.577	-97.4312
2012-12-19 15:38:40	92.97	95.75	10.8961	-94.7706	-97.6045
2012-12-19 15:48:40	93.14	95.93	10.9031	-94.9439	-97.788
2012-12-19 15:58:40	93.32	96.13	10.91	-95.1274	-97.9918
2012-12-19 16:08:40	93.52	96.33	10.917	-95.3313	-98.1957
2012-12-19 16:18:40	93.75	96.55	10.9239	-95.5657	-98.42	2012-12-19 16:18:40
2012-12-19 16:28:40	93.96	96.77	10.9309	-95.7798	-98.6442
2012-12-19 16:38:40	94.2	97	10.9378	-96.0245	-98.8787
2012-12-19 16:48:40	93.95	96.77	10.9447	-95.7696	-98.6442
2012-12-19 16:58:40	94.39	97.19	10.9517	-96.2181	-99.0724
2012-12-19 17:08:40	94.65	97.46	10.9586	-96.4832	-99.3476
2012-12-19 17:18:40	94.89	97.7	10.9656	-96.7278	-99.5923	2012-12-19 17:18:40
2012-12-19 17:28:40	95.12	97.93	10.9725	-96.9623	-99.8267
2012-12-19 17:38:40	95.31	98.14	10.9795	-97.156	-100.041
2012-12-19 17:48:40	95.55	98.34	10.9864	-97.4006	-100.245
2012-12-19 17:58:40	95.78	98.56	10.9934	-97.6351	-100.469
2012-12-19 18:08:40	95.99	98.81	11.0003	-97.8491	-100.724
2012-12-19 18:18:40	96.22	99.03	11.0072	-98.0836	-100.948	2012-12-19 18:18:40
2012-12-19 18:28:40	96.45	99.26	11.0142	-98.318	-101.182
2012-12-19 18:38:40	96.69	99.47	11.0211	-98.5627	-101.397
2012-12-19 18:48:40	96.91	99.73	11.0281	-98.787	-101.662
2012-12-19 18:58:40	97.13	99.94	11.035	-99.0112	-101.876
2012-12-19 19:08:40	97.35	100.17	11.042	-99.2355	-102.11
2012-12-19 19:18:40	97.57	100.39	11.0489	-99.4597	-102.334	2012-12-19 19:18:40
2012-12-19 19:28:40	97.79	100.61	11.0559	-99.684	-102.559
2012-12-19 19:38:40	98.02	100.85	11.0628	-99.9185	-102.803
2012-12-19 19:48:40	98.25	101.05	11.0697	-100.153	-103.007
2012-12-19 19:58:40	98.49	101.3	11.0767	-100.398	-103.262
2012-12-19 20:08:40	98.7	101.52	11.0836	-100.612	-103.486
2012-12-19 20:18:40	98.91	101.72	11.0906	-100.826	-103.69	2012-12-19 20:18:40
2012-12-19 20:28:40	99.17	101.96	11.0975	-101.091	-103.935
2012-12-19 20:38:40	99.36	102.16	11.1045	-101.284	-104.139
2012-12-19 20:48:40	99.63	102.46	11.1114	-101.56	-104.444
2012-12-19 20:58:40	99.86	102.7	11.1184	-101.794	-104.689
2012-12-19 21:08:40	100.11	102.93	11.1253	-102.049	-104.924
2012-12-19 21:18:40	100.35	103.18	11.1322	-102.294	-105.178	2012-12-19 21:18:40
2012-12-19 21:28:40	100.58	103.42	11.1392	-102.528	-105.423
2012-12-19 21:38:40	100.81	103.66	11.1461	-102.762	-105.668
2012-12-19 21:48:40	101.07	103.88	11.1531	-103.028	-105.892
2012-12-19 21:58:40	101.31	104.15	11.16	-103.272	-106.167
2012-12-19 22:08:40	101.52	104.33	11.167	-103.486	-106.351
2012-12-19 22:18:40	101.78	104.6	11.1739	-103.751	-106.626	2012-12-19 22:18:40
2012-12-19 22:28:40	102.01	104.85	11.1809	-103.986	-106.881
2012-12-19 22:38:40	102.23	105.09	11.1878	-104.21	-107.125
2012-12-19 22:48:40	102.51	105.33	11.1947	-104.495	-107.37
2012-12-19 22:58:40	102.77	105.56	11.2017	-104.76	-107.604
2012-12-19 23:08:40	102.94	105.77	11.2086	-104.934	-107.819
2012-12-19 23:18:40	103.15	106	11.2156	-105.148	-108.053	2012-12-19 23:18:40
2012-12-19 23:28:40	103.37	106.22	11.2225	-105.372	-108.277
2012-12-19 23:38:40	103.59	106.45	11.2295	-105.596	-108.512
2012-12-19 23:48:40	103.83	106.69	11.2364	-105.841	-108.756
2012-12-19 23:58:40	104.07	106.94	11.2434	-106.086	-109.011
2012-12-20 00:08:40	104.35	107.21	11.2503	-106.371	-109.286
2012-12-20 00:18:40	104.57	107.42	11.2572	-106.595	-109.501	2012-12-20 00:18:40
2012-12-20 00:28:40	104.81	107.67	11.2642	-106.84	-109.755
2012-12-20 00:38:40	105.03	107.91	11.2711	-107.064	-110
2012-12-20 00:48:40	105.28	108.15	11.2781	-107.319	-110.245
2012-12-20 00:58:40	105.55	108.41	11.285	-107.594	-110.51
2012-12-20 01:08:40	105.79	108.66	11.292	-107.839	-110.765
2012-12-20 01:18:40	106.03	108.93	11.2989	-108.084	-111.04	2012-12-20 01:18:40
2012-12-20 01:28:40	106.3	109.19	11.3059	-108.359	-111.305
2012-12-20 01:38:40	106.53	109.4	11.3128	-108.593	-111.519
2012-12-20 01:48:40	106.76	109.66	11.3197	-108.828	-111.784
2012-12-20 01:58:40	107	109.92	11.3267	-109.072	-112.049
2012-12-20 02:08:40	107.26	110.14	11.3336	-109.337	-112.273
2012-12-20 02:18:40	107.5	110.41	11.3406	-109.582	-112.548	2012-12-20 02:18:40
2012-12-20 02:28:40	107.75	110.6	11.3475	-109.837	-112.742
2012-12-20 02:38:40	107.96	110.84	11.3545	-110.051	-112.987
2012-12-20 02:48:40	108.22	111.13	11.3614	-110.316	-113.282
2012-12-20 02:58:40	108.48	111.37	11.3684	-110.581	-113.527
2012-12-20 03:08:40	108.68	111.56	11.3753	-110.785	-113.721
2012-12-20 03:18:40	109.03	111.8	11.3822	-111.142	-113.965	2012-12-20 03:18:40
2012-12-20 03:28:40	109.3	112.1	11.3892	-111.417	-114.271
2012-12-20 03:38:40	109.48	112.33	11.3961	-111.6	-114.506
2012-12-20 03:48:40	109.69	112.61	11.4031	-111.814	-114.791
2012-12-20 03:58:40	109.94	112.86	11.41	-112.069	-115.046
2012-12-20 04:08:40	110.19	113.09	11.417	-112.324	-115.28
2012-12-20 04:18:40	110.46	113.38	11.4239	-112.599	-115.576	2012-12-20 04:18:40
2012-12-20 04:28:40	110.72	113.62	11.4309	-112.864	-115.821
2012-12-20 04:38:40	110.97	113.91	11.4378	-113.119	-116.116
2012-12-20 04:48:40	111.21	114.15	11.4447	-113.364	-116.361
2012-12-20 04:58:40	111.47	114.4	11.4517	-113.629	-116.616
2012-12-20 05:08:40	111.71	114.67	11.4586	-113.874	-116.891
2012-12-20 05:18:40	112.06	114.93	11.4656	-114.23	-117.156	2012-12-20 05:18:40
2012-12-20 05:28:40	112.35	115.19	11.4725	-114.526	-117.421
2012-12-20 05:38:40	112.53	115.46	11.4795	-114.709	-117.696
2012-12-20 05:48:40	112.79	115.74	11.4864	-114.975	-117.982
2012-12-20 05:58:40	113.22	116	11.4934	-115.413	-118.247
2012-12-20 06:08:40	113.38	116.29	11.5003	-115.576	-118.542
2012-12-20 06:18:40	113.6	116.54	11.5072	-115.8	-118.797	2012-12-20 06:18:40
2012-12-20 06:28:40	113.9	116.81	11.5142	-116.106	-119.072
2012-12-20 06:38:40	114.16	117.09	11.5211	-116.371	-119.358
2012-12-20 06:48:40	114.46	117.35	11.5281	-116.677	-119.623
2012-12-20 06:58:40	114.7	117.61	11.535	-116.922	-119.888
2012-12-20 07:08:40	114.86	117.83	11.542	-117.085	-120.112
2012-12-20 07:18:40	115.09	118.07	11.5489	-117.319	-120.357	2012-12-20 07:18:40
2012-12-20 07:28:40	115.37	118.29	11.5559	-117.604	-120.581
2012-12-20 07:38:40	115.62	118.52	11.5628	-117.859	-120.815
2012-12-20 07:48:40	115.74	118.78	11.5697	-117.982	-121.081
2012-12-20 07:58:40	115.96	118.99	11.5767	-118.206	-121.295
2012-12-20 08:08:40	116.18	119.2	11.5836	-118.43	-121.509
2012-12-20 08:18:40	116.41	119.44	11.5906	-118.665	-121.753	2012-12-20 08:18:40
2012-12-20 08:28:40	116.18	119.3	11.5975	-118.43	-121.611
2012-12-20 08:38:40	116.75	119.84	11.6045	-119.011	-122.161
2012-12-20 08:48:40	117.12	120.18	11.6114	-119.388	-122.508
2012-12-20 08:58:40	117.48	120.49	11.6184	-119.755	-122.824
2012-12-20 09:08:40	117.73	120.84	11.6253	-120.01	-123.18
2012-12-20 09:18:40	117.99	121.05	11.6322	-120.275	-123.394	2012-12-20 09:18:40
2012-12-20 09:28:40	118.29	121.39	11.6392	-120.581	-123.741
2012-12-20 09:38:40	118.59	121.7	11.6461	-120.887	-124.057
2012-12-20 09:48:40	118.91	122.05	11.6531	-121.213	-124.414
2012-12-20 09:58:40	119.17	122.33	11.66	-121.478	-124.699
2012-12-20 10:08:40	119.46	122.54	11.667	-121.774	-124.913
2012-12-20 10:18:40	119.74	122.85	11.6739	-122.059	-125.229	2012-12-20 10:18:40
2012-12-20 10:28:40	119.98	123.08	11.6809	-122.304	-125.464
2012-12-20 10:38:40	120.2	123.29	11.6878	-122.528	-125.678
2012-12-20 10:48:40	120.39	123.5	11.6947	-122.722	-125.892
2012-12-20 10:58:40	120.63	123.71	11.7017	-122.966	-126.106
2012-12-20 11:08:40	120.81	123.94	11.7086	-123.15	-126.34
2012-12-20 11:18:40	121.05	124.2	11.7156	-123.394	-126.606	2012-12-20 11:18:40
2012-12-20 11:28:40	121.33	124.45	11.7225	-123.68	-126.86
2012-12-20 11:38:40	121.45	124.74	11.7295	-123.802	-127.156
2012-12-20 11:48:40	121.74	125.08	11.7364	-124.098	-127.503
2012-12-20 11:58:40	122.14	125.52	11.7434	-124.506	-127.951
2012-12-20 12:08:40	122.52	125.9	11.7503	-124.893	-128.338
2012-12-20 12:18:40	122.99	126.32	11.7572	-125.372	-128.767	2012-12-20 12:18:40
2012-12-20 12:28:40	123.35	126.73	11.7642	-125.739	-129.185
2012-12-20 12:38:40	123.64	126.92	11.7711	-126.035	-129.378
2012-12-20 12:48:40	123.86	127.03	11.7781	-126.259	-129.49
2012-12-20 12:58:40	124.14	127.35	11.785	-126.544	-129.817
2012-12-20 13:08:40	124.4	127.6	11.792	-126.809	-130.071
2012-12-20 13:18:40	124.65	127.9	11.7989	-127.064	-130.377	2012-12-20 13:18:40
2012-12-20 13:28:40	124.91	128.15	11.8059	-127.329	-130.632
2012-12-20 13:38:40	125.19	128.46	11.8128	-127.615	-130.948
2012-12-20 13:48:40	125.49	128.75	11.8197	-127.92	-131.244
2012-12-20 13:58:40	125.75	128.98	11.8267	-128.186	-131.478
2012-12-20 14:08:40	126.03	129.25	11.8336	-128.471	-131.753
2012-12-20 14:18:40	126.29	129.54	11.8406	-128.736	-132.049	2012-12-20 14:18:40
2012-12-20 14:28:40	126.55	129.76	11.8475	-129.001	-132.273
2012-12-20 14:38:40	126.8	130.03	11.8545	-129.256	-132.548
2012-12-20 14:48:40	127.04	130.29	11.8614	-129.501	-132.813
2012-12-20 14:58:40	127.31	130.58	11.8684	-129.776	-133.109
2012-12-20 15:08:40	127.57	130.88	11.8753	-130.041	-133.415
2012-12-20 15:18:40	127.86	131.17	11.8822	-130.336	-133.71	2012-12-20 15:18:40
2012-12-20 15:28:40	128.13	131.43	11.8892	-130.612	-133.976
2012-12-20 15:38:40	128.4	131.71	11.8961	-130.887	-134.261
2012-12-20 15:48:40	128.67	131.95	11.9031	-131.162	-134.506
2012-12-20 15:58:40	128.92	132.26	11.91	-131.417	-134.822
2012-12-20 16:08:40	129.19	132.49	11.917	-131.692	-135.056
2012-12-20 16:18:40	129.47	132.82	11.9239	-131.978	-135.392	2012-12-20 16:18:40
2012-12-20 16:28:40	129.73	133.08	11.9309	-132.243	-135.657
2012-12-20 16:38:40	130	133.37	11.9378	-132.518	-135.953
2012-12-20 16:48:40	130.27	133.63	11.9447	-132.793	-136.218
2012-12-20 16:58:40	130.53	133.9	11.9517	-133.058	-136.493
2012-12-20 17:08:40	130.8	134.21	11.9586	-133.333	-136.809
2012-12-20 17:18:40	131.07	134.46	11.9656	-133.609	-137.064	2012-12-20 17:18:40
2012-12-20 17:28:40	131.28	134.78	11.9725	-133.823	-137.39
2012-12-20 17:38:40	131.6	135.03	11.9795	-134.149	-137.645
2012-12-20 17:48:40	131.86	135.31	11.9864	-134.414	-137.931
2012-12-20 17:58:40	132.14	135.57	11.9934	-134.699	-138.196
2012-12-20 18:08:40	132.39	135.84	12.0003	-134.954	-138.471
2012-12-20 18:18:40	132.63	136.08	12.0072	-135.199	-138.716	2012-12-20 18:18:40
2012-12-20 18:28:40	132.92	136.34	12.0142	-135.494	-138.981
2012-12-20 18:38:40	133.17	136.64	12.0211	-135.749	-139.286
2012-12-20 18:48:40	133.44	136.89	12.0281	-136.024	-139.541
2012-12-20 18:58:40	133.69	137.14	12.035	-136.279	-139.796
2012-12-20 19:08:40	133.94	137.42	12.042	-136.534	-140.082
2012-12-20 19:18:40	134.21	137.68	12.0489	-136.809	-140.347	2012-12-20 19:18:40
2012-12-20 19:28:40	134.54	138.06	12.0559	-137.146	-140.734
2012-12-20 19:38:40	134.81	138.33	12.0628	-137.421	-141.009
2012-12-20 19:48:40	135.08	138.61	12.0697	-137.696	-141.295
2012-12-20 19:58:40	135.33	138.87	12.0767	-137.951	-141.56
2012-12-20 20:08:40	135.61	139.18	12.0836	-138.236	-141.876
2012-12-20 20:18:40	135.86	139.44	12.0906	-138.491	-142.141	2012-12-20 20:18:40
2012-12-20 20:28:40	136.14	139.7	12.0975	-138.777	-142.406
2012-12-20 20:38:40	136.38	139.99	12.1045	-139.021	-142.701
2012-12-20 20:48:40	136.66	140.27	12.1114	-139.307	-142.987
2012-12-20 20:58:40	136.9	140.53	12.1184	-139.551	-143.252
2012-12-20 21:08:40	137.18	140.81	12.1253	-139.837	-143.537
2012-12-20 21:18:40	137.42	141.07	12.1322	-140.082	-143.802	2012-12-20 21:18:40
2012-12-20 21:28:40	137.67	141.36	12.1392	-140.336	-144.098
2012-12-20 21:38:40	137.95	141.62	12.1461	-140.622	-144.363
2012-12-20 21:48:40	138.2	141.86	12.1531	-140.877	-144.608
2012-12-20 21:58:40	138.44	142.12	12.16	-141.121	-144.873
2012-12-20 22:08:40	138.71	142.39	12.167	-141.397	-145.148
2012-12-20 22:18:40	138.96	142.65	12.1739	-141.651	-145.413	2012-12-20 22:18:40
2012-12-20 22:28:40	139.22	142.92	12.1809	-141.916	-145.688
2012-12-20 22:38:40	139.45	143.17	12.1878	-142.151	-145.943
2012-12-20 22:48:40	139.71	143.47	12.1947	-142.416	-146.249
2012-12-20 22:58:40	139.97	143.73	12.2017	-142.681	-146.514
2012-12-20 23:08:40	140.2	144	12.2086	-142.915	-146.789
2012-12-20 23:18:40	140.48	144.24	12.2156	-143.201	-147.034	2012-12-20 23:18:40
2012-12-20 23:28:40	140.7	144.48	12.2225	-143.425	-147.278
2012-12-20 23:38:40	140.97	144.74	12.2295	-143.7	-147.543
2012-12-20 23:48:40	141.21	145.02	12.2364	-143.945	-147.829
2012-12-20 23:58:40	141.43	145.28	12.2434	-144.169	-148.094
2012-12-21 00:08:40	141.7	145.48	12.2503	-144.444	-148.298
2012-12-21 00:18:40	141.93	145.76	12.2572	-144.679	-148.583	2012-12-21 00:18:40
2012-12-21 00:28:40	142.18	146.06	12.2642	-144.934	-148.889
2012-12-21 00:38:40	142.43	146.31	12.2711	-145.189	-149.144
2012-12-21 00:48:40	142.67	146.52	12.2781	-145.433	-149.358
2012-12-21 00:58:40	142.9	146.77	12.285	-145.668	-149.613
2012-12-21 01:08:40	143.11	147.04	12.292	-145.882	-149.888
2012-12-21 01:18:40	143.37	147.29	12.2989	-146.147	-150.143	2012-12-21 01:18:40
2012-12-21 01:28:40	143.61	147.56	12.3059	-146.391	-150.418
2012-12-21 01:38:40	143.84	147.8	12.3128	-146.626	-150.663
2012-12-21 01:48:40	144.08	148.03	12.3197	-146.871	-150.897
2012-12-21 01:58:40	144.32	148.32	12.3267	-147.115	-151.193
2012-12-21 02:08:40	144.56	148.57	12.3336	-147.36	-151.448
2012-12-21 02:18:40	144.79	148.8	12.3406	-147.594	-151.682	2012-12-21 02:18:40
2012-12-21 02:28:40	145.02	149.04	12.3475	-147.829	-151.927
2012-12-21 02:38:40	145.25	149.29	12.3545	-148.063	-152.181
2012-12-21 02:48:40	145.48	149.52	12.3614	-148.298	-152.416
2012-12-21 02:58:40	145.71	149.74	12.3684	-148.532	-152.64
2012-12-21 03:08:40	145.91	150	12.3753	-148.736	-152.905
2012-12-21 03:18:40	146.17	150.26	12.3822	-149.001	-153.17	2012-12-21 03:18:40
2012-12-21 03:28:40	146.39	150.53	12.3892	-149.225	-153.445
2012-12-21 03:38:40	146.63	150.75	12.3961	-149.47	-153.67
2012-12-21 03:48:40	146.85	151	12.4031	-149.694	-153.925
2012-12-21 03:58:40	147.08	151.22	12.41	-149.929	-154.149
2012-12-21 04:08:40	147.31	151.47	12.417	-150.163	-154.404
2012-12-21 04:18:40	147.53	151.7	12.4239	-150.387	-154.638	2012-12-21 04:18:40
2012-12-21 04:28:40	147.75	151.95	12.4309	-150.612	-154.893
2012-12-21 04:38:40	147.97	152.16	12.4378	-150.836	-155.107
2012-12-21 04:48:40	148.19	152.43	12.4447	-151.06	-155.382
2012-12-21 04:58:40	148.42	152.64	12.4517	-151.295	-155.596
2012-12-21 05:08:40	148.66	152.86	12.4586	-151.539	-155.821
2012-12-21 05:18:40	148.87	153.13	12.4656	-151.753	-156.096	2012-12-21 05:18:40
2012-12-21 05:28:40	149.09	153.38	12.4725	-151.978	-156.351
2012-12-21 05:38:40	149.3	153.63	12.4795	-152.192	-156.606
2012-12-21 05:48:40	149.53	153.87	12.4864	-152.426	-156.85
2012-12-21 05:58:40	149.74	154.11	12.4934	-152.64	-157.095
2012-12-21 06:08:40	149.98	154.33	12.5003	-152.885	-157.319
2012-12-21 06:18:40	150.2	154.6	12.5072	-153.109	-157.594	2012-12-21 06:18:40
2012-12-21 06:28:40	150.41	154.81	12.5142	-153.323	-157.808
2012-12-21 06:38:40	150.64	155.07	12.5211	-153.558	-158.073
2012-12-21 06:48:40	150.86	155.3	12.5281	-153.782	-158.308
2012-12-21 06:58:40	151.09	155.53	12.535	-154.016	-158.542
2012-12-21 07:08:40	151.29	155.77	12.542	-154.22	-158.787
2012-12-21 07:18:40	151.51	155.99	12.5489	-154.444	-159.011	2012-12-21 07:18:40
2012-12-21 07:28:40	151.72	156.24	12.5559	-154.659	-159.266
2012-12-21 07:38:40	151.93	156.46	12.5628	-154.873	-159.49
2012-12-21 07:48:40	152.14	156.68	12.5697	-155.087	-159.715
2012-12-21 07:58:40	152.35	156.9	12.5767	-155.301	-159.939
2012-12-21 08:08:40	152.53	156.9	12.5836	-155.484	-159.939
2012-12-21 08:18:40	152.12	156.89	12.5906	-155.066	-159.929	2012-12-21 08:18:40
2012-12-21 08:28:40	152.78	157.19	12.5975	-155.739	-160.234
2012-12-21 08:38:40	152.95	157.39	12.6045	-155.912	-160.438
2012-12-21 08:48:40	153.11	157.55	12.6114	-156.075	-160.601
2012-12-21 08:58:40	153.3	157.77	12.6184	-156.269	-160.826
2012-12-21 09:08:40	153.48	158.01	12.6253	-156.453	-161.07
2012-12-21 09:18:40	153.66	158.21	12.6322	-156.636	-161.274	2012-12-21 09:18:40
2012-12-21 09:28:40	153.85	158.41	12.6392	-156.83	-161.478
2012-12-21 09:38:40	154.05	158.63	12.6461	-157.034	-161.702
2012-12-21 09:48:40	154.23	158.83	12.6531	-157.217	-161.906
2012-12-21 09:58:40	154.43	159.04	12.66	-157.421	-162.12
2012-12-21 10:08:40	154.61	159.23	12.667	-157.604	-162.314
2012-12-21 10:18:40	154.82	159.45	12.6739	-157.819	-162.538	2012-12-21 10:18:40
2012-12-21 10:28:40	155	159.67	12.6809	-158.002	-162.762
2012-12-21 10:38:40	155.18	159.9	12.6878	-158.186	-162.997
2012-12-21 10:48:40	155.41	160.09	12.6947	-158.42	-163.191
2012-12-21 10:58:40	155.57	160.31	12.7017	-158.583	-163.415
2012-12-21 11:08:40	155.75	160.49	12.7086	-158.767	-163.598
2012-12-21 11:18:40	155.92	160.73	12.7156	-158.94	-163.843	2012-12-21 11:18:40
2012-12-21 11:28:40	156.11	160.94	12.7225	-159.134	-164.057
2012-12-21 11:38:40	156.3	161.15	12.7295	-159.327	-164.271
2012-12-21 11:48:40	156.49	161.39	12.7364	-159.521	-164.516
2012-12-21 11:58:40	156.68	161.6	12.7434	-159.715	-164.73
2012-12-21 12:08:40	156.87	161.81	12.7503	-159.908	-164.944
2012-12-21 12:18:40	157.05	162.01	12.7572	-160.092	-165.148	2012-12-21 12:18:40
2012-12-21 12:28:40	157.24	162.18	12.7642	-160.285	-165.321
2012-12-21 12:38:40	157.43	162.44	12.7711	-160.479	-165.586
2012-12-21 12:48:40	157.61	162.65	12.7781	-160.663	-165.8
2012-12-21 12:58:40	157.8	162.88	12.785	-160.856	-166.035
2012-12-21 13:08:40	157.98	163.06	12.792	-161.04	-166.218
2012-12-21 13:18:40	158.17	163.25	12.7989	-161.233	-166.412	2012-12-21 13:18:40
2012-12-21 13:28:40	158.35	163.48	12.8059	-161.417	-166.646
2012-12-21 13:38:40	158.53	163.7	12.8128	-161.6	-166.871
2012-12-21 13:48:40	158.72	163.91	12.8197	-161.794	-167.085
2012-12-21 13:58:40	158.91	164.11	12.8267	-161.988	-167.288
2012-12-21 14:08:40	159.09	164.33	12.8336	-162.171	-167.513
2012-12-21 14:18:40	159.28	164.54	12.8406	-162.365	-167.727	2012-12-21 14:18:40
2012-12-21 14:28:40	159.47	164.76	12.8475	-162.559	-167.951
2012-12-21 14:38:40	159.64	164.97	12.8545	-162.732	-168.165
2012-12-21 14:48:40	159.83	165.21	12.8614	-162.926	-168.41
2012-12-21 14:58:40	160.01	165.38	12.8684	-163.109	-168.583
2012-12-21 15:08:40	160.18	165.6	12.8753	-163.282	-168.807
2012-12-21 15:18:40	160.37	165.82	12.8822	-163.476	-169.032	2012-12-21 15:18:40
2012-12-21 15:28:40	160.56	166	12.8892	-163.67	-169.215
2012-12-21 15:38:40	160.74	166.21	12.8961	-163.853	-169.429
2012-12-21 15:48:40	160.93	166.42	12.9031	-164.047	-169.643
2012-12-21 15:58:40	161.1	166.61	12.91	-164.22	-169.837
2012-12-21 16:08:40	161.27	166.81	12.917	-164.393	-170.041
2012-12-21 16:18:40	161.46	167.03	12.9239	-164.587	-170.265	2012-12-21 16:18:40
2012-12-21 16:28:40	161.62	167.24	12.9309	-164.75	-170.479
2012-12-21 16:38:40	161.79	167.46	12.9378	-164.924	-170.703
2012-12-21 16:48:40	161.98	167.69	12.9447	-165.117	-170.938
2012-12-21 16:58:40	162.14	167.88	12.9517	-165.28	-171.131
2012-12-21 17:08:40	162.33	168.12	12.9586	-165.474	-171.376
2012-12-21 17:18:40	162.5	168.33	12.9656	-165.647	-171.59	2012-12-21 17:18:40
2012-12-21 17:28:40	162.67	168.57	12.9725	-165.821	-171.835
2012-12-21 17:38:40	162.87	168.78	12.9795	-166.024	-172.049
2012-12-21 17:48:40	163.06	169.01	12.9864	-166.218	-172.283
2012-12-21 17:58:40	163.24	169.22	12.9934	-166.402	-172.497
2012-12-21 18:08:40	163.43	169.45	13.0003	-166.595	-172.732
2012-12-21 18:18:40	163.62	169.67	13.0072	-166.789	-172.956	2012-12-21 18:18:40
2012-12-21 18:28:40	163.34	169.69	13.0142	-166.504	-172.977
2012-12-21 18:38:40	163.85	169.99	13.0211	-167.023	-173.282
2012-12-21 18:48:40	164.03	170.22	13.0281	-167.207	-173.517
2012-12-21 18:58:40	164.17	170.4	13.035	-167.35	-173.7
2012-12-21 19:08:40	164.38	170.64	13.042	-167.564	-173.945
2012-12-21 19:18:40	164.58	170.85	13.0489	-167.768	-174.159	2012-12-21 19:18:40
2012-12-21 19:28:40	164.77	171.07	13.0559	-167.961	-174.383
2012-12-21 19:38:40	164.93	171.28	13.0628	-168.124	-174.597
2012-12-21 19:48:40	165.11	171.51	13.0697	-168.308	-174.832
2012-12-21 19:58:40	165.3	171.72	13.0767	-168.502	-175.046
2012-12-21 20:08:40	165.48	171.92	13.0836	-168.685	-175.25
2012-12-21 20:18:40	165.65	172.15	13.0906	-168.858	-175.484	2012-12-21 20:18:40
2012-12-21 20:28:40	165.84	172.33	13.0975	-169.052	-175.668
2012-12-21 20:38:40	166.01	172.55	13.1045	-169.225	-175.892
2012-12-21 20:48:40	166.18	172.74	13.1114	-169.399	-176.086
2012-12-21 20:58:40	166.35	172.96	13.1184	-169.572	-176.31
2012-12-21 21:08:40	166.53	173.17	13.1253	-169.755	-176.524
2012-12-21 21:18:40	166.7	173.4	13.1322	-169.929	-176.758	2012-12-21 21:18:40
2012-12-21 21:28:40	166.85	173.6	13.1392	-170.082	-176.962
2012-12-21 21:38:40	167.03	173.83	13.1461	-170.265	-177.197
2012-12-21 21:48:40	167.19	174	13.1531	-170.428	-177.37
2012-12-21 21:58:40	167.37	174.22	13.16	-170.612	-177.594
2012-12-21 22:08:40	167.54	174.43	13.167	-170.785	-177.808
2012-12-21 22:18:40	167.69	174.63	13.1739	-170.938	-178.012	2012-12-21 22:18:40
2012-12-21 22:28:40	167.82	174.86	13.1809	-171.07	-178.247
2012-12-21 22:38:40	168.03	175.04	13.1878	-171.284	-178.43
2012-12-21 22:48:40	168.19	175.25	13.1947	-171.448	-178.644
2012-12-21 22:58:40	168.36	175.47	13.2017	-171.621	-178.869
2012-12-21 23:08:40	168.52	175.67	13.2086	-171.784	-179.072
2012-12-21 23:18:40	168.69	175.88	13.2156	-171.957	-179.286	2012-12-21 23:18:40
2012-12-21 23:28:40	168.86	176.06	13.2225	-172.13	-179.47
2012-12-21 23:38:40	169	176.3	13.2295	-172.273	-179.715
2012-12-21 23:48:40	169.17	176.48	13.2364	-172.446	-179.898
2012-12-21 23:58:40	169.34	176.7	13.2434	-172.62	-180.122
2012-12-22 00:08:40	169.5	176.91	13.2503	-172.783	-180.336
2012-12-22 00:18:40	169.65	177.11	13.2572	-172.936	-180.54	2012-12-22 00:18:40
2012-12-22 00:28:40	169.82	177.32	13.2642	-173.109	-180.754
2012-12-22 00:38:40	169.98	177.52	13.2711	-173.272	-180.958
2012-12-22 00:48:40	170.13	177.61	13.2781	-173.425	-181.05
2012-12-22 00:58:40	170.3	177.95	13.285	-173.598	-181.397
2012-12-22 01:08:40	170.44	178.15	13.292	-173.741	-181.6
2012-12-22 01:18:40	170.59	178.35	13.2989	-173.894	-181.804	2012-12-22 01:18:40
2012-12-22 01:28:40	170.75	178.54	13.3059	-174.057	-181.998
2012-12-22 01:38:40	170.92	178.73	13.3128	-174.23	-182.192
2012-12-22 01:48:40	171.07	178.93	13.3197	-174.383	-182.396
2012-12-22 01:58:40	171.23	179.14	13.3267	-174.546	-182.61
2012-12-22 02:08:40	171.37	179.35	13.3336	-174.689	-182.824
2012-12-22 02:18:40	171.53	179.57	13.3406	-174.852	-183.048	2012-12-22 02:18:40
2012-12-22 02:28:40	171.67	179.77	13.3475	-174.995	-183.252
2012-12-22 02:38:40	171.84	179.97	13.3545	-175.168	-183.456
2012-12-22 02:48:40	171.99	180.15	13.3614	-175.321	-183.639
2012-12-22 02:58:40	172.15	180.36	13.3684	-175.484	-183.853
2012-12-22 03:08:40	172.28	180.57	13.3753	-175.617	-184.067
2012-12-22 03:18:40	172.44	180.77	13.3822	-175.78	-184.271	2012-12-22 03:18:40
2012-12-22 03:28:40	172.6	180.98	13.3892	-175.943	-184.485
2012-12-22 03:38:40	172.74	181.17	13.3961	-176.086	-184.679
2012-12-22 03:48:40	172.89	181.38	13.4031	-176.239	-184.893
2012-12-22 03:58:40	173.02	181.56	13.41	-176.371	-185.076
2012-12-22 04:08:40	173.19	181.78	13.417	-176.544	-185.301
2012-12-22 04:18:40	173.34	181.93	13.4239	-176.697	-185.454	2012-12-22 04:18:40
2012-12-22 04:28:40	173.43	182.13	13.4309	-176.789	-185.657
2012-12-22 04:38:40	173.63	182.36	13.4378	-176.993	-185.892
2012-12-22 04:48:40	173.77	182.55	13.4447	-177.136	-186.086
2012-12-22 04:58:40	173.93	182.76	13.4517	-177.299	-186.3
2012-12-22 05:08:40	174.07	182.96	13.4586	-177.441	-186.504
2012-12-22 05:18:40	174.2	183.17	13.4656	-177.574	-186.718	2012-12-22 05:18:40
2012-12-22 05:28:40	174.35	183.33	13.4725	-177.727	-186.881
2012-12-22 05:38:40	174.5	183.52	13.4795	-177.88	-187.074
2012-12-22 05:48:40	174.63	183.75	13.4864	-178.012	-187.309
2012-12-22 05:58:40	174.78	183.96	13.4934	-178.165	-187.523
2012-12-22 06:08:40	174.93	184.14	13.5003	-178.318	-187.706
2012-12-22 06:18:40	175.06	184.34	13.5072	-178.451	-187.91	2012-12-22 06:18:40
2012-12-22 06:28:40	175.19	184.54	13.5142	-178.583	-188.114
2012-12-22 06:38:40	175.34	184.75	13.5211	-178.736	-188.328
2012-12-22 06:48:40	175.47	184.96	13.5281	-178.869	-188.542
2012-12-22 06:58:40	175.61	185.16	13.535	-179.011	-188.746
2012-12-22 07:08:40	175.77	185.33	13.542	-179.174	-188.919
2012-12-22 07:18:40	175.9	185.54	13.5489	-179.307	-189.134	2012-12-22 07:18:40
2012-12-22 07:28:40	176.04	185.76	13.5559	-179.45	-189.358
2012-12-22 07:38:40	176.2	185.94	13.5628	-179.613	-189.541
2012-12-22 07:48:40	176.32	186.15	13.5697	-179.735	-189.755
2012-12-22 07:58:40	176.44	186.36	13.5767	-179.857	-189.969
2012-12-22 08:08:40	176.59	186.55	13.5836	-180.01	-190.163
2012-12-22 08:18:40	176.72	186.73	13.5906	-180.143	-190.347	2012-12-22 08:18:40
2012-12-22 08:28:40	176.95	187.07	13.5975	-180.377	-190.693
2012-12-22 08:38:40	177.06	187.2	13.6045	-180.489	-190.826
2012-12-22 08:48:40	177.23	187.47	13.6114	-180.663	-191.101
2012-12-22 08:58:40	177.37	187.66	13.6184	-180.805	-191.295
2012-12-22 09:08:40	177.5	187.86	13.6253	-180.938	-191.498
2012-12-22 09:18:40	177.62	188.06	13.6322	-181.06	-191.702	2012-12-22 09:18:40
2012-12-22 09:28:40	177.77	188.24	13.6392	-181.213	-191.886
2012-12-22 09:38:40	177.89	188.44	13.6461	-181.335	-192.09
2012-12-22 09:48:40	176.68	187.8	13.6531	-180.102	-191.437
2012-12-22 09:58:40	178	188.67	13.66	-181.448	-192.324
2012-12-22 10:08:40	178.16	188.86	13.667	-181.611	-192.518
2012-12-22 10:18:40	178.29	189.1	13.6739	-181.743	-192.762	2012-12-22 10:18:40
2012-12-22 10:28:40	178.43	189.29	13.6809	-181.886	-192.956
2012-12-22 10:38:40	178.55	189.48	13.6878	-182.008	-193.15
2012-12-22 10:48:40	178.68	189.67	13.6947	-182.141	-193.344
2012-12-22 10:58:40	178.81	189.87	13.7017	-182.273	-193.547
2012-12-22 11:08:40	178.93	190.06	13.7086	-182.396	-193.741
2012-12-22 11:18:40	179.06	189.36	13.7156	-182.528	-193.028	2012-12-22 11:18:40
2012-12-22 11:28:40	179.21	190.39	13.7225	-182.681	-194.077
2012-12-22 11:38:40	179.3	190.6	13.7295	-182.773	-194.292
2012-12-22 11:48:40	179.44	190.79	13.7364	-182.915	-194.485
2012-12-22 11:58:40	179.56	190.97	13.7434	-183.038	-194.669
2012-12-22 12:08:40	179.66	191.14	13.7503	-183.14	-194.842
2012-12-22 12:18:40	179.81	191.34	13.7572	-183.293	-195.046	2012-12-22 12:18:40
2012-12-22 12:28:40	179.92	191.53	13.7642	-183.405	-195.24
2012-12-22 12:38:40	180.01	191.67	13.7711	-183.496	-195.382
2012-12-22 12:48:40	180.15	191.84	13.7781	-183.639	-195.556
2012-12-22 12:58:40	180.29	192.08	13.785	-183.782	-195.8
2012-12-22 13:08:40	180.42	192.26	13.792	-183.914	-195.984
2012-12-22 13:18:40	180.54	192.48	13.7989	-184.037	-196.208	2012-12-22 13:18:40
2012-12-22 13:28:40	180.66	192.67	13.8059	-184.159	-196.402
2012-12-22 13:38:40	180.77	192.84	13.8128	-184.271	-196.575
2012-12-22 13:48:40	180.9	193.04	13.8197	-184.404	-196.779
2012-12-22 13:58:40	181.03	193.22	13.8267	-184.536	-196.962
2012-12-22 14:08:40	181.13	193.41	13.8336	-184.638	-197.156
2012-12-22 14:18:40	181.27	193.59	13.8406	-184.781	-197.339	2012-12-22 14:18:40
2012-12-22 14:28:40	181.38	193.77	13.8475	-184.893	-197.523
2012-12-22 14:38:40	181.48	193.95	13.8545	-184.995	-197.706
2012-12-22 14:48:40	181.62	194.16	13.8614	-185.138	-197.92
2012-12-22 14:58:40	181.72	194.34	13.8684	-185.24	-198.104
2012-12-22 15:08:40	181.85	194.55	13.8753	-185.372	-198.318
2012-12-22 15:18:40	181.96	194.74	13.8822	-185.484	-198.512	2012-12-22 15:18:40
2012-12-22 15:28:40	182.1	194.94	13.8892	-185.627	-198.716
2012-12-22 15:38:40	182.21	195.14	13.8961	-185.739	-198.919
2012-12-22 15:48:40	182.33	195.35	13.9031	-185.861	-199.134
2012-12-22 15:58:40	182.43	195.54	13.91	-185.963	-199.327
2012-12-22 16:08:40	182.54	195.71	13.917	-186.075	-199.501
2012-12-22 16:18:40	182.69	195.92	13.9239	-186.228	-199.715	2012-12-22 16:18:40
2012-12-22 16:28:40	182.78	196.11	13.9309	-186.32	-199.908
2012-12-22 16:38:40	182.91	196.31	13.9378	-186.453	-200.112
2012-12-22 16:48:40	183.04	196.47	13.9447	-186.585	-200.275
2012-12-22 16:58:40	183.16	196.66	13.9517	-186.707	-200.469
2012-12-22 17:08:40	183.27	196.9	13.9586	-186.82	-200.714
2012-12-22 17:18:40	183.38	197.11	13.9656	-186.932	-200.928	2012-12-22 17:18:40
2012-12-22 17:28:40	183.5	197.29	13.9725	-187.054	-201.111
2012-12-22 17:38:40	183.63	197.49	13.9795	-187.187	-201.315
2012-12-22 17:48:40	183.72	197.69	13.9864	-187.278	-201.519
2012-12-22 17:58:40	183.86	197.88	13.9934	-187.421	-201.713
[truncated: 1,267 more rows]

## Sheet: Tensi
Zeit [d]	MP bot(2) [cm]	MP top(1) [cm]		air entry bot		AE time	AE [cm]	Type	Pos	Weight
0.00200448	0.203874	-2.30377		nan	8800	#VALUE!	-8970.44	1	2	1
0.0436712	-1.40673	-3.85321
0.0853378	-2.59939	-5.05607		air entry top
0.127004	-3.62895	-6.09582		Time				Type	Pos	Weight
0.168671	-4.55657	-7.05403		2012-12-30 00:18:40	8800	21.2572	-8970.44	1	1	1
0.210338	-5.19878	-7.68603
0.252004	-5.92253	-8.41998
0.293671	-6.7788	-9.28644
0.335338	-7.55352	-10.0714
0.377004	-8.28746	-10.8155
0.418671	-8.96024	-11.4781
0.460338	-9.684	-12.212
0.502004	-10.3772	-12.9052
0.543671	-11.0398	-13.5576
0.585338	-11.682	-14.2202
0.627004	-12.2834	-14.8114
0.668671	-12.8135	-15.2905
0.710338	-13.4455	-16.0245
1.63395	-17.4108	-19.9286
1.67562	-17.5229	-20.051
1.71728	-17.8287	-20.3568
1.75895	-18.0836	-20.6218
1.79266	-18.2773	-20.8053
1.79682	-18.3078	-20.8461
1.80099	-18.3384	-20.8665
1.80516	-18.369	-20.897
1.80932	-18.42	-20.948
1.81349	-18.3894	-20.9276
1.81766	-18.4404	-20.9684
1.82182	-18.4506	-20.9684
1.82599	-18.4811	-20.999
1.83016	-18.5015	-21.0296
1.84057	-18.5321	-21.0703
1.88224	-18.8685	-21.3965
1.92391	-18.7156	-21.2436
1.96557	-19.1335	-21.682
2.00724	-19.1845	-21.7227
2.04891	-19.4597	-22.0082
2.09057	-19.5413	-22.0795
2.13224	-19.8267	-22.3751
2.17391	-20.0102	-22.5586
2.21557	-19.4088	-21.9674
2.25724	-20.1835	-22.7319
2.29891	-20.5301	-23.0887
2.34057	-20.7543	-23.3129
2.38224	-20.8257	-23.4862
2.42391	-21.1315	-23.6799
2.46557	-21.1723	-23.7309
2.50724	-21.315	-23.8532
2.54891	-21.3863	-23.9246
2.59057	-21.631	-24.1794
2.63224	-21.7431	-24.2915
2.67391	-21.9572	-24.5158
2.71557	-22.0591	-24.6483
2.75724	-22.2324	-24.7808
2.79891	-22.3649	-24.9134
2.84057	-22.3955	-24.9439
2.88224	-22.3649	-24.9032
2.92391	-22.3853	-25.0255
2.96557	-22.3038	-24.8828
3.00724	-22.579	-25.1274
3.04891	-22.6911	-25.3313
3.09057	-22.844	-25.4638
3.13224	-23.1702	-25.7696
3.17391	-23.3537	-25.9327
3.21557	-23.4455	-26.0856
3.25724	-23.5984	-26.2487
3.29891	-23.7411	-26.4016
3.34057	-23.8226	-26.4832
3.38224	-23.894	-26.5851
3.42391	-23.9755	-26.6667
3.46557	-24.0775	-26.7686
3.50724	-24.1998	-26.9113
3.54891	-24.3527	-27.0336
3.59057	-24.4954	-27.1865
3.63224	-24.6075	-27.3089
3.67391	-24.7095	-27.3904
3.71557	-24.9643	-27.5433
3.75724	-24.9847	-27.686
3.79891	-25.1274	-27.8186
3.84057	-25.2497	-27.9307
3.88224	-25.3823	-28.0734
3.92391	-25.5148	-28.2059
3.96557	-25.6575	-28.3486
4.00724	-25.8002	-28.5015
4.04891	-25.9123	-28.6137
4.09057	-26.1366	-28.8481
4.13224	-26.2691	-28.9704
4.17391	-26.3405	-29.052
4.21557	-26.4628	-29.1539
4.25724	-26.6565	-29.3578
4.29891	-26.8196	-29.5107
4.34057	-26.9317	-29.6126
4.38224	-26.7176	-29.419
4.42391	-27.0948	-29.7961
4.46557	-27.2681	-29.9592
4.50724	-27.4108	-30.1121
4.54891	-27.5433	-30.2345
4.59057	-27.6656	-30.3568
4.63224	-27.9103	-30.581
4.67391	-28.0428	-30.6932
4.71557	-28.1651	-30.8257
4.75724	-28.2569	-30.9174
4.79891	-28.3078	-30.9378
4.84057	-28.2773	-30.9276
4.88224	-28.5423	-31.1927
4.92391	-28.6646	-31.3252
4.96557	-28.8889	-31.5494
5.00724	-29.103	-31.7431
5.04891	-29.2661	-31.896
5.09057	-29.4393	-32.0999
5.13224	-29.5719	-32.2426
5.17391	-29.7146	-32.4159
5.21557	-29.949	-32.6504
5.25724	-30.1529	-32.8542
5.29891	-30.367	-33.0581
5.34057	-30.5505	-33.2416
5.38224	-30.8155	-33.4353
5.42391	-30.9378	-33.6391
5.46557	-31.1417	-33.8328
5.50724	-31.2946	-33.9959
5.54891	-31.4577	-34.1794
5.59057	-31.5596	-34.2813
5.63224	-31.6922	-34.3935
5.67391	-31.8349	-34.5158
5.71557	-31.998	-34.6789
5.75724	-32.1611	-34.842
5.79891	-32.3445	-35.0153
5.84057	-32.5382	-35.2294
5.88224	-32.7421	-35.423
5.92391	-32.9664	-35.6371
5.96557	-33.1397	-35.8206
6.00724	-33.3741	-36.0449
6.04891	-33.6086	-36.2793
6.09057	-33.8634	-36.5138
6.13224	-34.0469	-36.6972
6.17391	-34.2304	-36.9011
6.21557	-34.4648	-37.1152
6.25724	-34.6789	-37.3394
6.29891	-34.893	-37.5637
6.34057	-35.0866	-37.7574
6.38224	-35.3313	-38.002
6.42391	-35.5148	-38.1855
6.46557	-35.7594	-38.42
6.50724	-35.9327	-38.5933
6.54891	-36.0754	-38.7462
6.59057	-36.2487	-38.9399
6.63224	-36.4322	-39.103
6.67391	-36.6361	-39.317
6.71557	-36.7686	-39.4393
6.75724	-36.9317	-39.5821
6.79891	-37.1356	-39.7859
6.84057	-37.3496	-39.9898
6.88224	-37.5739	-40.2345
6.92391	-37.7982	-40.4383
6.96557	-38.0224	-40.6932
7.00724	-38.2671	-40.9072
7.04891	-38.4506	-41.1009
7.09057	-38.7156	-41.366
7.13224	-38.9602	-41.6106
7.17391	-39.2355	-41.8756
7.21557	-39.4597	-42.0999
7.25724	-39.684	-42.314
7.29891	-39.9388	-42.5892
7.34057	-40.2345	-42.8542
7.38224	-40.4587	-43.1091
7.42391	-40.7034	-43.3537
7.46557	-40.9684	-43.629
7.50724	-41.2334	-43.894
7.54891	-41.5596	-44.21
7.59057	-41.8451	-44.4954
7.63224	-42.0591	-44.7095
7.67391	-42.3242	-44.9745
7.71557	-42.5892	-45.2396
7.75724	-42.8644	-45.525
7.79891	-43.1498	-45.8002
7.84057	-43.4557	-46.1162
7.88224	-43.7513	-46.4118
7.92391	-44.0163	-46.6769
7.96557	-44.3629	-47.0133
8.00724	-44.5973	-47.2885
8.04891	-45.0051	-47.6758
8.09057	-45.3313	-48.002
8.13224	-45.7085	-48.3792
8.17391	-46.0652	-48.736
8.21557	-46.4118	-49.0928
8.25724	-46.7788	-49.4495
8.29891	-47.1662	-49.8471
8.34057	-47.5229	-50.2039
8.38224	-47.8797	-50.5607
8.42391	-48.2569	-50.9378
8.46557	-48.5831	-51.2436
8.50724	-48.9501	-51.631
8.54891	-49.3068	-51.998
8.59057	-49.7248	-52.3955
8.63224	-50.1019	-52.7523
8.67391	-50.5708	-52.212
8.71557	-51.0805	-53.7411
8.75724	-51.6004	-54.261
8.79891	-52.2528	-54.893
8.84057	-52.844	-55.5046
8.88224	-53.3945	-56.0652
8.92391	-53.9959	-56.6667
8.96557	-54.6279	-57.2885
9.00724	-55.2294	-57.9103
9.04891	-55.8818	-58.5627
9.09057	-56.5138	-59.1947
9.13224	-57.1865	-59.8573
9.17391	-57.8593	-60.5403
9.21557	-58.5219	-61.2029
9.25724	-59.2355	-61.9164
9.29891	-59.9592	-62.6402
9.34057	-60.7136	-63.3945
9.38224	-61.4373	-64.1284
9.42391	-62.1916	-64.893
9.46557	-62.9358	-65.6269
9.50724	-63.6901	-66.3812
9.54891	-64.4648	-67.1458
9.59057	-65.1886	-67.8899
9.63224	-65.7696	-68.4709
9.67391	-66.4628	-69.1641
9.71557	-67.2069	-69.9083
9.75724	-68.0224	-70.7136
9.79891	-68.8277	-71.5392
9.84057	-69.5413	-72.2222
9.88224	-70.4179	-73.1091
9.92391	-71.2232	-73.945
9.96557	-71.5698	-74.3017
10.0072	-72.5178	-75.2599
10.0489	-73.5066	-76.2181
10.0906	-74.4444	-77.1967
10.1322	-75.4434	-78.1957
10.1739	-76.4322	-79.1641
10.2156	-77.37	-80.1223
10.2572	-78.3486	-81.0805
10.2989	-79.2966	-82.0795
10.3406	-80.2243	-83.0071
10.3822	-81.264	-84.0469
10.4239	-82.2324	-85.0357
10.4656	-83.2824	-86.0754
10.5072	-84.3425	-87.1356
10.5489	-85.4128	-88.2263
10.5906	-86.208	-89.0112
10.6322	-87.421	-90.1631
10.6739	-88.6952	-91.2538
10.7156	-89.5719	-92.3751
10.7572	-90.7849	-93.5678
10.7989	-91.947	-94.7808
10.8406	-93.1498	-95.9837
10.8822	-94.3629	-97.2069
10.9239	-95.5657	-98.42
10.9656	-96.7278	-99.5923
11.0072	-98.0836	-100.948
11.0489	-99.4597	-102.334
11.0906	-100.826	-103.69
11.1322	-102.294	-105.178
11.1739	-103.751	-106.626
11.2156	-105.148	-108.053
11.2572	-106.595	-109.501
11.2989	-108.084	-111.04
11.3406	-109.582	-112.548
11.3822	-111.142	-113.965
11.4239	-112.599	-115.576
11.4656	-114.23	-117.156
11.5072	-115.8	-118.797
11.5489	-117.319	-120.357
11.5906	-118.665	-121.753
11.6322	-120.275	-123.394
11.6739	-122.059	-125.229
11.7156	-123.394	-126.606
11.7572	-125.372	-128.767
11.7989	-127.064	-130.377
11.8406	-128.736	-132.049
11.8822	-130.336	-133.71
11.9239	-131.978	-135.392
11.9656	-133.609	-137.064
12.0072	-135.199	-138.716
12.0489	-136.809	-140.347
12.0906	-138.491	-142.141
12.1322	-140.082	-143.802
12.1739	-141.651	-145.413
12.2156	-143.201	-147.034
12.2572	-144.679	-148.583
12.2989	-146.147	-150.143
12.3406	-147.594	-151.682
12.3822	-149.001	-153.17
12.4239	-150.387	-154.638
12.4656	-151.753	-156.096
12.5072	-153.109	-157.594
12.5489	-154.444	-159.011
12.5906	-155.066	-159.929
12.6322	-156.636	-161.274
12.6739	-157.819	-162.538
12.7156	-158.94	-163.843
12.7572	-160.092	-165.148
12.7989	-161.233	-166.412
12.8406	-162.365	-167.727
12.8822	-163.476	-169.032
12.9239	-164.587	-170.265
12.9656	-165.647	-171.59
13.0072	-166.789	-172.956
13.0489	-167.768	-174.159
13.0906	-168.858	-175.484
13.1322	-169.929	-176.758
13.1739	-170.938	-178.012
13.2156	-171.957	-179.286
13.2572	-172.936	-180.54
13.2989	-173.894	-181.804
13.3406	-174.852	-183.048
13.3822	-175.78	-184.271
13.4239	-176.697	-185.454
13.4656	-177.574	-186.718
13.5072	-178.451	-187.91
13.5489	-179.307	-189.134
13.5906	-180.143	-190.347
13.6322	-181.06	-191.702
13.6739	-181.743	-192.762
13.7156	-182.528	-193.028
13.7572	-183.293	-195.046
13.7989	-184.037	-196.208
13.8406	-184.781	-197.339
13.8822	-185.484	-198.512
13.9239	-186.228	-199.715
13.9656	-186.932	-200.928
14.0072	-187.594	-202.12
14.0489	-186.463	-202.212
14.0906	-189.062	-204.597
14.1322	-189.796	-205.841
14.1739	-190.652	-207.299
14.2156	-191.356	-208.563
14.2572	-191.998	-209.857
14.2989	-192.62	-211.121
14.3406	-193.313	-212.385
14.3822	-193.965	-213.629
14.4239	-194.577	-214.964
14.4656	-195.199	-216.249
14.5072	-195.81	-217.513
14.5489	-196.463	-218.858
14.5906	-196.606	-219.99
14.6322	-197.299	-221.182
14.6739	-198.002	-222.936
14.7156	-198.828	-224.771
14.7572	-199.46	-226.442
14.7989	-200.061	-228.094
14.8406	-200.652	-229.745
14.8822	-201.172	-231.284
14.9239	-201.774	-232.966
14.9656	-202.375	-234.526
15.0072	-202.956	-236.29
15.0489	-203.517	-237.829
15.0906	-204.027	-239.501
15.1322	-204.618	-240.897
15.1739	-205.178	-242.671
15.2156	-205.729	-244.332
15.2572	-206.269	-246.157
15.2989	-206.871	-248.033
15.3406	-207.431	-249.857
15.3822	-208.043	-251.814
15.4239	-208.624	-253.833
15.4656	-209.225	-255.882
15.5072	-209.837	-257.941
15.5489	-210.438	-260.133
15.5906	-211.04	-262.426
15.6322	-211.631	-264.597
15.6739	-212.243	-266.911
15.7156	-212.824	-269.225
15.7572	-213.456	-271.651
15.7989	-214.057	-274.179
15.8406	-214.709	-277.003
15.8822	-215.382	-279.602
15.9239	-215.963	-282.385
15.9656	-216.555	-285.056
16.0072	-217.207	-288.073
16.0489	-217.768	-290.989
16.0906	-218.44	-294.343
16.1322	-219.083	-297.655
16.1739	-219.694	-300.866
16.2156	-220.285	-304.659
16.2572	-220.856	-308.226
16.2989	-221.519	-312.171
16.3406	-222.141	-316.035
16.3822	-222.773	-320.082
16.4239	-223.425	-324.251
16.4656	-224.108	-328.716
16.5072	-224.75	-333.323
16.5489	-225.403	-337.982
16.5906	-226.137	-342.966
16.6322	-226.85	-348.002
16.6739	-227.554	-353.425
16.7156	-228.277	-358.573
16.7572	-228.175	-360.917
16.7989	-229.501	-368.624
16.8406	-230.357	-374.801
16.8822	-231.04	-380.387
16.9239	-232.09	-386.483
16.9656	-232.966	-393.16
17.0072	-233.853	-399.123
17.0489	-234.669	-405.668
17.0906	-235.566	-412.181
17.1322	-236.453	-418.848
17.1739	-237.319	-425.617
17.2156	-238.155	-432.854
17.2572	-239.042	-439.847
17.2989	-239.949	-446.932
17.3406	-240.846	-454.077
17.3822	-241.733	-462.263
17.4239	-242.712	-469.98
17.4656	-243.68	-477.941
17.5072	-244.292	-486.371
17.5489	-245.545	-494.434
17.5906	-246.575	-503.517
17.6322	-247.574	-512.548
17.6739	-248.644	-521.733
17.7156	-249.725	-531.927
17.7572	-250.775	-542.008
17.7989	-251.855	-552.559
17.8406	-252.915	-562.752
17.8822	-253.812	-569.113
17.9239	-255.872	-584.811
17.9656	-257.166	-597.645
18.0072	-258.654	-611.6
18.0489	-259.898	-625.8
18.0906	-260.917	-639.99
18.1322	-262.497	-654.516
18.1739	-263.945	-670.102
18.2156	-265.433	-686.065
18.2572	-266.881	-699.959
18.2989	-268.614	-717.288
18.3406	-270.153	-734.271
18.3822	-271.549	-751.764
18.4239	-272.987	-769.806
18.4656	-274.414	-789.378
18.5072	-276.096	-811.468
18.5489	-277.655	-834.281
18.5906	-279.317	-858.685
18.6322	-281.529
18.6739	-283.496
18.7156	-285.556
18.7572	-284.995
18.7989	-289.827
18.8406	-292.345
18.8822	-294.679
18.9239	-297.227
18.9656	-299.735
19.0072	-291.386
19.0489	-305.423
19.0906	-308.685
19.1322	-311.814
19.1739	-314.801
19.2156	-318.267
19.2572	-321.611
19.2989	-325.454
19.3406	-329.409
19.3822	-333.384
19.4239	-338.012
19.4656	-342.661
19.5072	-347.187
19.5489	-351.967
19.5906	-357.217
19.6322	-362.569
19.6739	-367.146
19.7156	-375.005
19.7572	-382.13
19.7989	-388.257
19.8406	-394.791
19.8822	-401.295
19.9239	-408.491
19.9656	-415.923
20.0072	-423.741
20.0489	-431.376
20.0906	-440.398
20.1322	-449.602
20.1739	-458.338
20.2156	-467.278
20.2572	-474.964
20.2989	-484.893
20.3406	-495.494
20.3822	-505.423
20.4239	-515.79
20.4656	-528.287
20.5072	-541.356
20.5489	-554.628
20.5906	-568.522
20.6322	-531.101
20.6739	-598.93
20.7156	-620.765
20.7572	-638.43
20.7989	-656.188
20.8406	-673.751
20.8822	-691.835
20.9239	-714.047
20.9656	-738.96
21.0072	-764.465
21.0489	-792.273
21.0906	-819.817
21.1322	-848.471
21.1739	-877.931
21.2156	-907.401
21.2572	-941.855
21.2989	-977.38
21.3406	-1011.61
21.3822	-1047.59
21.4239	-1086.09
21.4586	-1117.47

## Sheet: HYDRUS
Data für die Zielfunktion: 2 x Tensionen, 1 x Endwassergehalt						Verdunstungsrate
Time	Obs	Type	Pos	Weight		Zeitintervall		Evarate [cm/d]			Type	1-Tension	2-Wassergehalt
0.00200448	0.203874	1	2	1		0.741523	0	0.429167			Pos	1-top	2-bot	(von oben nach unten)
0.0436712	-1.40673	1	2	1		1.07069	0	0.384723			34	Time-Variable boundary conditions+
0.0853378	-2.59939	1	2	1		1.63809	0	0.349239			22.762	Final Time	Time Information
0.127004	-3.62895	1	2	1		1.98284	0	0.271633			974	Number of Data Points in Objective Function
0.168671	-4.55657	1	2	1		2.21243	0	0.262411		Interpolated Values	-5.19535	BC-top	[hPa]
0.210338	-5.19878	1	2	1		2.74305	0	0.261832			-3.94535	MP_top_ini	[hPa]	1
0.252004	-5.92253	1	2	1		2.97847	0	0.271583			-0.940528	MP_bot_ini	[hPa]	2
0.293671	-6.7788	1	2	1		3.63691	0	0.273872			0.309472	BC-bot	[hPa]
0.335338	-7.55352	1	2	1		3.97205	0	0.271479
0.377004	-8.28746	1	2	1		4.65862	0	0.259069
0.418671	-8.96024	1	2	1		5.16245	0	0.266809
0.460338	-9.684	1	2	1		5.63646	0	0.263707		Real Values	-3.72706	BC-top	[cm]
0.502004	-10.3772	1	2	1		6.08123	0	0.261233			-2.47706	MP_top_ini	[cm]
0.543671	-11.0398	1	2	1		6.73371	0	0.237742			-0.0101937	MP_bot_ini	[cm]
0.585338	-11.682	1	2	1		7.85422	0	0.219638			1.23981	BC-bot	[cm]
0.627004	-12.2834	1	2	1		8.62332	0	0.219546
0.668671	-12.8135	1	2	1		9.59697	0	0.252557
0.710338	-13.4455	1	2	1		9.9325	0	0.226581
1.63395	-17.4108	1	2	1		10.5862	0	0.230729
1.67562	-17.5229	1	2	1		10.9422	0	0.223869
1.71728	-17.8287	1	2	1		11.5972	0	0.221508
1.75895	-18.0836	1	2	1		11.9707	0	0.234829
1.79266	-18.2773	1	2	1		12.5901	0	0.226616
1.79682	-18.3078	1	2	1		13.0136	0	0.224994
1.80099	-18.3384	1	2	1		13.6524	0	0.235143
1.80516	-18.369	1	2	1		14.0474	0	0.22512
1.80932	-18.42	1	2	1		14.6128	0	0.221109
1.81349	-18.3894	1	2	1		16.7386	0	0.198962
1.81766	-18.4404	1	2	1		17.8586	0	0.116724
1.82182	-18.4506	1	2	1		18.7484	0	0.0974228
1.82599	-18.4811	1	2	1		19.0019	0	0.0889107
1.83016	-18.5015	1	2	1		19.6486	0	0.0868214
1.84057	-18.5321	1	2	1		20.6316	0	0.0775496
1.88224	-18.8685	1	2	1		22.762	0	0.0615735
1.92391	-18.7156	1	2	1
1.96557	-19.1335	1	2	1
2.00724	-19.1845	1	2	1
2.04891	-19.4597	1	2	1
2.09057	-19.5413	1	2	1
2.13224	-19.8267	1	2	1
2.17391	-20.0102	1	2	1
2.21557	-19.4088	1	2	1
2.25724	-20.1835	1	2	1
2.29891	-20.5301	1	2	1
2.34057	-20.7543	1	2	1
2.38224	-20.8257	1	2	1
2.42391	-21.1315	1	2	1
2.46557	-21.1723	1	2	1
2.50724	-21.315	1	2	1
2.54891	-21.3863	1	2	1
2.59057	-21.631	1	2	1
2.63224	-21.7431	1	2	1
2.67391	-21.9572	1	2	1
2.71557	-22.0591	1	2	1
2.75724	-22.2324	1	2	1
2.79891	-22.3649	1	2	1
2.84057	-22.3955	1	2	1
2.88224	-22.3649	1	2	1
2.92391	-22.3853	1	2	1
2.96557	-22.3038	1	2	1
3.00724	-22.579	1	2	1
3.04891	-22.6911	1	2	1
3.09057	-22.844	1	2	1
3.13224	-23.1702	1	2	1
3.17391	-23.3537	1	2	1
3.21557	-23.4455	1	2	1
3.25724	-23.5984	1	2	1
3.29891	-23.7411	1	2	1
3.34057	-23.8226	1	2	1
3.38224	-23.894	1	2	1
3.42391	-23.9755	1	2	1
3.46557	-24.0775	1	2	1
3.50724	-24.1998	1	2	1
3.54891	-24.3527	1	2	1
3.59057	-24.4954	1	2	1
3.63224	-24.6075	1	2	1
3.67391	-24.7095	1	2	1
3.71557	-24.9643	1	2	1
3.75724	-24.9847	1	2	1
3.79891	-25.1274	1	2	1
3.84057	-25.2497	1	2	1
3.88224	-25.3823	1	2	1
3.92391	-25.5148	1	2	1
3.96557	-25.6575	1	2	1
4.00724	-25.8002	1	2	1
4.04891	-25.9123	1	2	1
4.09057	-26.1366	1	2	1
4.13224	-26.2691	1	2	1
4.17391	-26.3405	1	2	1
4.21557	-26.4628	1	2	1
4.25724	-26.6565	1	2	1
4.29891	-26.8196	1	2	1
4.34057	-26.9317	1	2	1
4.38224	-26.7176	1	2	1
4.42391	-27.0948	1	2	1
4.46557	-27.2681	1	2	1
4.50724	-27.4108	1	2	1
4.54891	-27.5433	1	2	1
4.59057	-27.6656	1	2	1
4.63224	-27.9103	1	2	1
4.67391	-28.0428	1	2	1
4.71557	-28.1651	1	2	1
4.75724	-28.2569	1	2	1
4.79891	-28.3078	1	2	1
4.84057	-28.2773	1	2	1
4.88224	-28.5423	1	2	1
4.92391	-28.6646	1	2	1
4.96557	-28.8889	1	2	1
5.00724	-29.103	1	2	1
5.04891	-29.2661	1	2	1
5.09057	-29.4393	1	2	1
5.13224	-29.5719	1	2	1
5.17391	-29.7146	1	2	1
5.21557	-29.949	1	2	1
5.25724	-30.1529	1	2	1
5.29891	-30.367	1	2	1
5.34057	-30.5505	1	2	1
5.38224	-30.8155	1	2	1
5.42391	-30.9378	1	2	1
5.46557	-31.1417	1	2	1
5.50724	-31.2946	1	2	1
5.54891	-31.4577	1	2	1
5.59057	-31.5596	1	2	1
5.63224	-31.6922	1	2	1
5.67391	-31.8349	1	2	1
5.71557	-31.998	1	2	1
5.75724	-32.1611	1	2	1
5.79891	-32.3445	1	2	1
5.84057	-32.5382	1	2	1
5.88224	-32.7421	1	2	1
5.92391	-32.9664	1	2	1
5.96557	-33.1397	1	2	1
6.00724	-33.3741	1	2	1
6.04891	-33.6086	1	2	1
6.09057	-33.8634	1	2	1
6.13224	-34.0469	1	2	1
6.17391	-34.2304	1	2	1
6.21557	-34.4648	1	2	1
6.25724	-34.6789	1	2	1
6.29891	-34.893	1	2	1
6.34057	-35.0866	1	2	1
6.38224	-35.3313	1	2	1
6.42391	-35.5148	1	2	1
6.46557	-35.7594	1	2	1
6.50724	-35.9327	1	2	1
6.54891	-36.0754	1	2	1
6.59057	-36.2487	1	2	1
6.63224	-36.4322	1	2	1
6.67391	-36.6361	1	2	1
6.71557	-36.7686	1	2	1
6.75724	-36.9317	1	2	1
6.79891	-37.1356	1	2	1
6.84057	-37.3496	1	2	1
6.88224	-37.5739	1	2	1
6.92391	-37.7982	1	2	1
6.96557	-38.0224	1	2	1
7.00724	-38.2671	1	2	1
7.04891	-38.4506	1	2	1
7.09057	-38.7156	1	2	1
7.13224	-38.9602	1	2	1
7.17391	-39.2355	1	2	1
7.21557	-39.4597	1	2	1
7.25724	-39.684	1	2	1
7.29891	-39.9388	1	2	1
7.34057	-40.2345	1	2	1
7.38224	-40.4587	1	2	1
7.42391	-40.7034	1	2	1
7.46557	-40.9684	1	2	1
7.50724	-41.2334	1	2	1
7.54891	-41.5596	1	2	1
7.59057	-41.8451	1	2	1
7.63224	-42.0591	1	2	1
7.67391	-42.3242	1	2	1
7.71557	-42.5892	1	2	1
7.75724	-42.8644	1	2	1
7.79891	-43.1498	1	2	1
7.84057	-43.4557	1	2	1
7.88224	-43.7513	1	2	1
7.92391	-44.0163	1	2	1
7.96557	-44.3629	1	2	1
8.00724	-44.5973	1	2	1
8.04891	-45.0051	1	2	1
8.09057	-45.3313	1	2	1
8.13224	-45.7085	1	2	1
8.17391	-46.0652	1	2	1
8.21557	-46.4118	1	2	1
8.25724	-46.7788	1	2	1
8.29891	-47.1662	1	2	1
8.34057	-47.5229	1	2	1
8.38224	-47.8797	1	2	1
8.42391	-48.2569	1	2	1
8.46557	-48.5831	1	2	1
8.50724	-48.9501	1	2	1
8.54891	-49.3068	1	2	1
8.59057	-49.7248	1	2	1
8.63224	-50.1019	1	2	1
8.67391	-50.5708	1	2	1
8.71557	-51.0805	1	2	1
8.75724	-51.6004	1	2	1
8.79891	-52.2528	1	2	1
8.84057	-52.844	1	2	1
8.88224	-53.3945	1	2	1
8.92391	-53.9959	1	2	1
8.96557	-54.6279	1	2	1
9.00724	-55.2294	1	2	1
9.04891	-55.8818	1	2	1
9.09057	-56.5138	1	2	1
9.13224	-57.1865	1	2	1
9.17391	-57.8593	1	2	1
9.21557	-58.5219	1	2	1
9.25724	-59.2355	1	2	1
9.29891	-59.9592	1	2	1
9.34057	-60.7136	1	2	1
9.38224	-61.4373	1	2	1
9.42391	-62.1916	1	2	1
9.46557	-62.9358	1	2	1
9.50724	-63.6901	1	2	1
9.54891	-64.4648	1	2	1
9.59057	-65.1886	1	2	1
9.63224	-65.7696	1	2	1
9.67391	-66.4628	1	2	1
9.71557	-67.2069	1	2	1
9.75724	-68.0224	1	2	1
9.79891	-68.8277	1	2	1
9.84057	-69.5413	1	2	1
9.88224	-70.4179	1	2	1
9.92391	-71.2232	1	2	1
9.96557	-71.5698	1	2	1
10.0072	-72.5178	1	2	1
10.0489	-73.5066	1	2	1
10.0906	-74.4444	1	2	1
10.1322	-75.4434	1	2	1
10.1739	-76.4322	1	2	1
10.2156	-77.37	1	2	1
10.2572	-78.3486	1	2	1
10.2989	-79.2966	1	2	1
10.3406	-80.2243	1	2	1
10.3822	-81.264	1	2	1
10.4239	-82.2324	1	2	1
10.4656	-83.2824	1	2	1
10.5072	-84.3425	1	2	1
10.5489	-85.4128	1	2	1
10.5906	-86.208	1	2	1
10.6322	-87.421	1	2	1
10.6739	-88.6952	1	2	1
10.7156	-89.5719	1	2	1
10.7572	-90.7849	1	2	1
10.7989	-91.947	1	2	1
10.8406	-93.1498	1	2	1
10.8822	-94.3629	1	2	1
10.9239	-95.5657	1	2	1
10.9656	-96.7278	1	2	1
11.0072	-98.0836	1	2	1
11.0489	-99.4597	1	2	1
11.0906	-100.826	1	2	1
11.1322	-102.294	1	2	1
11.1739	-103.751	1	2	1
11.2156	-105.148	1	2	1
11.2572	-106.595	1	2	1
11.2989	-108.084	1	2	1
11.3406	-109.582	1	2	1
11.3822	-111.142	1	2	1
11.4239	-112.599	1	2	1
11.4656	-114.23	1	2	1
11.5072	-115.8	1	2	1
11.5489	-117.319	1	2	1
11.5906	-118.665	1	2	1
11.6322	-120.275	1	2	1
11.6739	-122.059	1	2	1
11.7156	-123.394	1	2	1
11.7572	-125.372	1	2	1
11.7989	-127.064	1	2	1
11.8406	-128.736	1	2	1
11.8822	-130.336	1	2	1
11.9239	-131.978	1	2	1
11.9656	-133.609	1	2	1
12.0072	-135.199	1	2	1
12.0489	-136.809	1	2	1
12.0906	-138.491	1	2	1
12.1322	-140.082	1	2	1
12.1739	-141.651	1	2	1
12.2156	-143.201	1	2	1
12.2572	-144.679	1	2	1
12.2989	-146.147	1	2	1
12.3406	-147.594	1	2	1
12.3822	-149.001	1	2	1
12.4239	-150.387	1	2	1
12.4656	-151.753	1	2	1
12.5072	-153.109	1	2	1
12.5489	-154.444	1	2	1
12.5906	-155.066	1	2	1
12.6322	-156.636	1	2	1
12.6739	-157.819	1	2	1
12.7156	-158.94	1	2	1
12.7572	-160.092	1	2	1
12.7989	-161.233	1	2	1
12.8406	-162.365	1	2	1
12.8822	-163.476	1	2	1
12.9239	-164.587	1	2	1
12.9656	-165.647	1	2	1
13.0072	-166.789	1	2	1
13.0489	-167.768	1	2	1
13.0906	-168.858	1	2	1
13.1322	-169.929	1	2	1
13.1739	-170.938	1	2	1
13.2156	-171.957	1	2	1
13.2572	-172.936	1	2	1
13.2989	-173.894	1	2	1
13.3406	-174.852	1	2	1
13.3822	-175.78	1	2	1
13.4239	-176.697	1	2	1
13.4656	-177.574	1	2	1
13.5072	-178.451	1	2	1
13.5489	-179.307	1	2	1
13.5906	-180.143	1	2	1
13.6322	-181.06	1	2	1
13.6739	-181.743	1	2	1
13.7156	-182.528	1	2	1
13.7572	-183.293	1	2	1
13.7989	-184.037	1	2	1
13.8406	-184.781	1	2	1
13.8822	-185.484	1	2	1
13.9239	-186.228	1	2	1
13.9656	-186.932	1	2	1
14.0072	-187.594	1	2	1
14.0489	-186.463	1	2	1
14.0906	-189.062	1	2	1
14.1322	-189.796	1	2	1
14.1739	-190.652	1	2	1
14.2156	-191.356	1	2	1
14.2572	-191.998	1	2	1
14.2989	-192.62	1	2	1
14.3406	-193.313	1	2	1
14.3822	-193.965	1	2	1
14.4239	-194.577	1	2	1
14.4656	-195.199	1	2	1
14.5072	-195.81	1	2	1
14.5489	-196.463	1	2	1
14.5906	-196.606	1	2	1
14.6322	-197.299	1	2	1
14.6739	-198.002	1	2	1
14.7156	-198.828	1	2	1
14.7572	-199.46	1	2	1
14.7989	-200.061	1	2	1
14.8406	-200.652	1	2	1
14.8822	-201.172	1	2	1
14.9239	-201.774	1	2	1
14.9656	-202.375	1	2	1
15.0072	-202.956	1	2	1
15.0489	-203.517	1	2	1
15.0906	-204.027	1	2	1
15.1322	-204.618	1	2	1
15.1739	-205.178	1	2	1
15.2156	-205.729	1	2	1
15.2572	-206.269	1	2	1
15.2989	-206.871	1	2	1
15.3406	-207.431	1	2	1
15.3822	-208.043	1	2	1
15.4239	-208.624	1	2	1
15.4656	-209.225	1	2	1
15.5072	-209.837	1	2	1
15.5489	-210.438	1	2	1
15.5906	-211.04	1	2	1
15.6322	-211.631	1	2	1
15.6739	-212.243	1	2	1
15.7156	-212.824	1	2	1
15.7572	-213.456	1	2	1
15.7989	-214.057	1	2	1
15.8406	-214.709	1	2	1
15.8822	-215.382	1	2	1
15.9239	-215.963	1	2	1
15.9656	-216.555	1	2	1
16.0072	-217.207	1	2	1
16.0489	-217.768	1	2	1
16.0906	-218.44	1	2	1
16.1322	-219.083	1	2	1
16.1739	-219.694	1	2	1
16.2156	-220.285	1	2	1
16.2572	-220.856	1	2	1
16.2989	-221.519	1	2	1
16.3406	-222.141	1	2	1
16.3822	-222.773	1	2	1
16.4239	-223.425	1	2	1
16.4656	-224.108	1	2	1
16.5072	-224.75	1	2	1
16.5489	-225.403	1	2	1
16.5906	-226.137	1	2	1
16.6322	-226.85	1	2	1
16.6739	-227.554	1	2	1
16.7156	-228.277	1	2	1
16.7572	-228.175	1	2	1
16.7989	-229.501	1	2	1
16.8406	-230.357	1	2	1
16.8822	-231.04	1	2	1
16.9239	-232.09	1	2	1
16.9656	-232.966	1	2	1
17.0072	-233.853	1	2	1
17.0489	-234.669	1	2	1
17.0906	-235.566	1	2	1
17.1322	-236.453	1	2	1
17.1739	-237.319	1	2	1
17.2156	-238.155	1	2	1
17.2572	-239.042	1	2	1
17.2989	-239.949	1	2	1
17.3406	-240.846	1	2	1
17.3822	-241.733	1	2	1
17.4239	-242.712	1	2	1
17.4656	-243.68	1	2	1
17.5072	-244.292	1	2	1
17.5489	-245.545	1	2	1
17.5906	-246.575	1	2	1
17.6322	-247.574	1	2	1
17.6739	-248.644	1	2	1
17.7156	-249.725	1	2	1
17.7572	-250.775	1	2	1
17.7989	-251.855	1	2	1
17.8406	-252.915	1	2	1
17.8822	-253.812	1	2	1
17.9239	-255.872	1	2	1
17.9656	-257.166	1	2	1
18.0072	-258.654	1	2	1
18.0489	-259.898	1	2	1
18.0906	-260.917	1	2	1
18.1322	-262.497	1	2	1
18.1739	-263.945	1	2	1
18.2156	-265.433	1	2	1
18.2572	-266.881	1	2	1
18.2989	-268.614	1	2	1
18.3406	-270.153	1	2	1
18.3822	-271.549	1	2	1
18.4239	-272.987	1	2	1
18.4656	-274.414	1	2	1
18.5072	-276.096	1	2	1
18.5489	-277.655	1	2	1
18.5906	-279.317	1	2	1
18.6322	-281.529	1	2	1
18.6739	-283.496	1	2	1
18.7156	-285.556	1	2	1
18.7572	-284.995	1	2	1
18.7989	-289.827	1	2	1
18.8406	-292.345	1	2	1
18.8822	-294.679	1	2	1
18.9239	-297.227	1	2	1
18.9656	-299.735	1	2	1
19.0072	-291.386	1	2	1
19.0489	-305.423	1	2	1
19.0906	-308.685	1	2	1
19.1322	-311.814	1	2	1
19.1739	-314.801	1	2	1
19.2156	-318.267	1	2	1
19.2572	-321.611	1	2	1
19.2989	-325.454	1	2	1
19.3406	-329.409	1	2	1
19.3822	-333.384	1	2	1
19.4239	-338.012	1	2	1
19.4656	-342.661	1	2	1
19.5072	-347.187	1	2	1
19.5489	-351.967	1	2	1
19.5906	-357.217	1	2	1
19.6322	-362.569	1	2	1
19.6739	-367.146	1	2	1
19.7156	-375.005	1	2	1
19.7572	-382.13	1	2	1
19.7989	-388.257	1	2	1
19.8406	-394.791	1	2	1
19.8822	-401.295	1	2	1
19.9239	-408.491	1	2	1
19.9656	-415.923	1	2	1
20.0072	-423.741	1	2	1
20.0489	-431.376	1	2	1
20.0906	-440.398	1	2	1
20.1322	-449.602	1	2	1
20.1739	-458.338	1	2	1
20.2156	-467.278	1	2	1
20.2572	-474.964	1	2	1
20.2989	-484.893	1	2	1
20.3406	-495.494	1	2	1
20.3822	-505.423	1	2	1
20.4239	-515.79	1	2	1
20.4656	-528.287	1	2	1
20.5072	-541.356	1	2	1
20.5489	-554.628	1	2	1
20.5906	-568.522	1	2	1
20.6322	-531.101	1	2	1
20.6739	-598.93	1	2	1
20.7156	-620.765	1	2	1
20.7572	-638.43	1	2	1
20.7989	-656.188	1	2	1
20.8406	-673.751	1	2	1
20.8822	-691.835	1	2	1
20.9239	-714.047	1	2	1
20.9656	-738.96	1	2	1
21.0072	-764.465	1	2	1
21.0489	-792.273	1	2	1
21.0906	-819.817	1	2	1
21.1322	-848.471	1	2	1
21.1739	-877.931	1	2	1
21.2156	-907.401	1	2	1
21.2572	-941.855	1	2	1
21.2989	-977.38	1	2	1
21.3406	-1011.61	1	2	1
21.3822	-1047.59	1	2	1
21.4239	-1086.09	1	2	1
21.4586	-1117.47	1	2	1
0.00200448	-2.30377	1	1	1
0.0436712	-3.85321	1	1	1
0.0853378	-5.05607	1	1	1
0.127004	-6.09582	1	1	1
0.168671	-7.05403	1	1	1
0.210338	-7.68603	1	1	1
0.252004	-8.41998	1	1	1
0.293671	-9.28644	1	1	1
0.335338	-10.0714	1	1	1
0.377004	-10.8155	1	1	1
0.418671	-11.4781	1	1	1
0.460338	-12.212	1	1	1
0.502004	-12.9052	1	1	1
0.543671	-13.5576	1	1	1
0.585338	-14.2202	1	1	1
0.627004	-14.8114	1	1	1
0.668671	-15.2905	1	1	1
0.710338	-16.0245	1	1	1
1.63395	-19.9286	1	1	1
1.67562	-20.051	1	1	1
1.71728	-20.3568	1	1	1
1.75895	-20.6218	1	1	1
1.79266	-20.8053	1	1	1
1.79682	-20.8461	1	1	1
1.80099	-20.8665	1	1	1
1.80516	-20.897	1	1	1
1.80932	-20.948	1	1	1
1.81349	-20.9276	1	1	1
1.81766	-20.9684	1	1	1
1.82182	-20.9684	1	1	1
1.82599	-20.999	1	1	1
1.83016	-21.0296	1	1	1
1.84057	-21.0703	1	1	1
1.88224	-21.3965	1	1	1
1.92391	-21.2436	1	1	1
1.96557	-21.682	1	1	1
2.00724	-21.7227	1	1	1
2.04891	-22.0082	1	1	1
2.09057	-22.0795	1	1	1
2.13224	-22.3751	1	1	1
2.17391	-22.5586	1	1	1
2.21557	-21.9674	1	1	1
2.25724	-22.7319	1	1	1
2.29891	-23.0887	1	1	1
2.34057	-23.3129	1	1	1
2.38224	-23.4862	1	1	1
2.42391	-23.6799	1	1	1
2.46557	-23.7309	1	1	1
2.50724	-23.8532	1	1	1
2.54891	-23.9246	1	1	1
2.59057	-24.1794	1	1	1
2.63224	-24.2915	1	1	1
2.67391	-24.5158	1	1	1
2.71557	-24.6483	1	1	1
2.75724	-24.7808	1	1	1
2.79891	-24.9134	1	1	1
2.84057	-24.9439	1	1	1
2.88224	-24.9032	1	1	1
2.92391	-25.0255	1	1	1
2.96557	-24.8828	1	1	1
3.00724	-25.1274	1	1	1
3.04891	-25.3313	1	1	1
3.09057	-25.4638	1	1	1
3.13224	-25.7696	1	1	1
3.17391	-25.9327	1	1	1
3.21557	-26.0856	1	1	1
3.25724	-26.2487	1	1	1
3.29891	-26.4016	1	1	1
3.34057	-26.4832	1	1	1
3.38224	-26.5851	1	1	1
3.42391	-26.6667	1	1	1
3.46557	-26.7686	1	1	1
3.50724	-26.9113	1	1	1
3.54891	-27.0336	1	1	1
3.59057	-27.1865	1	1	1
3.63224	-27.3089	1	1	1
3.67391	-27.3904	1	1	1
3.71557	-27.5433	1	1	1
3.75724	-27.686	1	1	1
3.79891	-27.8186	1	1	1
3.84057	-27.9307	1	1	1
3.88224	-28.0734	1	1	1
3.92391	-28.2059	1	1	1
3.96557	-28.3486	1	1	1
4.00724	-28.5015	1	1	1
4.04891	-28.6137	1	1	1
4.09057	-28.8481	1	1	1
4.13224	-28.9704	1	1	1
4.17391	-29.052	1	1	1
4.21557	-29.1539	1	1	1
4.25724	-29.3578	1	1	1
4.29891	-29.5107	1	1	1
4.34057	-29.6126	1	1	1
4.38224	-29.419	1	1	1
4.42391	-29.7961	1	1	1
4.46557	-29.9592	1	1	1
4.50724	-30.1121	1	1	1
4.54891	-30.2345	1	1	1
4.59057	-30.3568	1	1	1
4.63224	-30.581	1	1	1
4.67391	-30.6932	1	1	1
4.71557	-30.8257	1	1	1
4.75724	-30.9174	1	1	1
4.79891	-30.9378	1	1	1
4.84057	-30.9276	1	1	1
4.88224	-31.1927	1	1	1
4.92391	-31.3252	1	1	1
4.96557	-31.5494	1	1	1
5.00724	-31.7431	1	1	1
5.04891	-31.896	1	1	1
5.09057	-32.0999	1	1	1
5.13224	-32.2426	1	1	1
5.17391	-32.4159	1	1	1
5.21557	-32.6504	1	1	1
5.25724	-32.8542	1	1	1
5.29891	-33.0581	1	1	1
5.34057	-33.2416	1	1	1
5.38224	-33.4353	1	1	1
5.42391	-33.6391	1	1	1
5.46557	-33.8328	1	1	1
5.50724	-33.9959	1	1	1
5.54891	-34.1794	1	1	1
5.59057	-34.2813	1	1	1
5.63224	-34.3935	1	1	1
5.67391	-34.5158	1	1	1
5.71557	-34.6789	1	1	1
5.75724	-34.842	1	1	1
5.79891	-35.0153	1	1	1
5.84057	-35.2294	1	1	1
5.88224	-35.423	1	1	1
5.92391	-35.6371	1	1	1
5.96557	-35.8206	1	1	1
6.00724	-36.0449	1	1	1
6.04891	-36.2793	1	1	1
6.09057	-36.5138	1	1	1
6.13224	-36.6972	1	1	1
6.17391	-36.9011	1	1	1
6.21557	-37.1152	1	1	1
6.25724	-37.3394	1	1	1
6.29891	-37.5637	1	1	1
6.34057	-37.7574	1	1	1
6.38224	-38.002	1	1	1
6.42391	-38.1855	1	1	1
6.46557	-38.42	1	1	1
6.50724	-38.5933	1	1	1
6.54891	-38.7462	1	1	1
6.59057	-38.9399	1	1	1
6.63224	-39.103	1	1	1
6.67391	-39.317	1	1	1
6.71557	-39.4393	1	1	1
6.75724	-39.5821	1	1	1
6.79891	-39.7859	1	1	1
6.84057	-39.9898	1	1	1
6.88224	-40.2345	1	1	1
6.92391	-40.4383	1	1	1
6.96557	-40.6932	1	1	1
7.00724	-40.9072	1	1	1
7.04891	-41.1009	1	1	1
7.09057	-41.366	1	1	1
7.13224	-41.6106	1	1	1
7.17391	-41.8756	1	1	1
7.21557	-42.0999	1	1	1
7.25724	-42.314	1	1	1
7.29891	-42.5892	1	1	1
7.34057	-42.8542	1	1	1
7.38224	-43.1091	1	1	1
7.42391	-43.3537	1	1	1
7.46557	-43.629	1	1	1
7.50724	-43.894	1	1	1
7.54891	-44.21	1	1	1
7.59057	-44.4954	1	1	1
7.63224	-44.7095	1	1	1
7.67391	-44.9745	1	1	1
7.71557	-45.2396	1	1	1
7.75724	-45.525	1	1	1
7.79891	-45.8002	1	1	1
7.84057	-46.1162	1	1	1
7.88224	-46.4118	1	1	1
7.92391	-46.6769	1	1	1
7.96557	-47.0133	1	1	1
8.00724	-47.2885	1	1	1
8.04891	-47.6758	1	1	1
8.09057	-48.002	1	1	1
8.13224	-48.3792	1	1	1
8.17391	-48.736	1	1	1
8.21557	-49.0928	1	1	1
8.25724	-49.4495	1	1	1
8.29891	-49.8471	1	1	1
8.34057	-50.2039	1	1	1
8.38224	-50.5607	1	1	1
8.42391	-50.9378	1	1	1
8.46557	-51.2436	1	1	1
8.50724	-51.631	1	1	1
8.54891	-51.998	1	1	1
8.59057	-52.3955	1	1	1
8.63224	-52.7523	1	1	1
8.67391	-52.212	1	1	1
8.71557	-53.7411	1	1	1
8.75724	-54.261	1	1	1
8.79891	-54.893	1	1	1
8.84057	-55.5046	1	1	1
8.88224	-56.0652	1	1	1
8.92391	-56.6667	1	1	1
8.96557	-57.2885	1	1	1
9.00724	-57.9103	1	1	1
9.04891	-58.5627	1	1	1
9.09057	-59.1947	1	1	1
9.13224	-59.8573	1	1	1
9.17391	-60.5403	1	1	1
9.21557	-61.2029	1	1	1
9.25724	-61.9164	1	1	1
9.29891	-62.6402	1	1	1
9.34057	-63.3945	1	1	1
9.38224	-64.1284	1	1	1
9.42391	-64.893	1	1	1
9.46557	-65.6269	1	1	1
9.50724	-66.3812	1	1	1
9.54891	-67.1458	1	1	1
9.59057	-67.8899	1	1	1
9.63224	-68.4709	1	1	1
9.67391	-69.1641	1	1	1
9.71557	-69.9083	1	1	1
9.75724	-70.7136	1	1	1
9.79891	-71.5392	1	1	1
9.84057	-72.2222	1	1	1
9.88224	-73.1091	1	1	1
9.92391	-73.945	1	1	1
9.96557	-74.3017	1	1	1
10.0072	-75.2599	1	1	1
10.0489	-76.2181	1	1	1
10.0906	-77.1967	1	1	1
10.1322	-78.1957	1	1	1
10.1739	-79.1641	1	1	1
10.2156	-80.1223	1	1	1
10.2572	-81.0805	1	1	1
10.2989	-82.0795	1	1	1
10.3406	-83.0071	1	1	1
10.3822	-84.0469	1	1	1
10.4239	-85.0357	1	1	1
10.4656	-86.0754	1	1	1
10.5072	-87.1356	1	1	1
10.5489	-88.2263	1	1	1
10.5906	-89.0112	1	1	1
10.6322	-90.1631	1	1	1
10.6739	-91.2538	1	1	1
10.7156	-92.3751	1	1	1
10.7572	-93.5678	1	1	1
10.7989	-94.7808	1	1	1
10.8406	-95.9837	1	1	1
10.8822	-97.2069	1	1	1
10.9239	-98.42	1	1	1
10.9656	-99.5923	1	1	1
11.0072	-100.948	1	1	1
11.0489	-102.334	1	1	1
11.0906	-103.69	1	1	1
11.1322	-105.178	1	1	1
11.1739	-106.626	1	1	1
11.2156	-108.053	1	1	1
11.2572	-109.501	1	1	1
11.2989	-111.04	1	1	1
11.3406	-112.548	1	1	1
11.3822	-113.965	1	1	1
11.4239	-115.576	1	1	1
11.4656	-117.156	1	1	1
11.5072	-118.797	1	1	1
11.5489	-120.357	1	1	1
11.5906	-121.753	1	1	1
11.6322	-123.394	1	1	1
11.6739	-125.229	1	1	1
11.7156	-126.606	1	1	1
11.7572	-128.767	1	1	1
11.7989	-130.377	1	1	1
11.8406	-132.049	1	1	1
11.8822	-133.71	1	1	1
11.9239	-135.392	1	1	1
11.9656	-137.064	1	1	1
12.0072	-138.716	1	1	1
12.0489	-140.347	1	1	1
12.0906	-142.141	1	1	1
12.1322	-143.802	1	1	1
12.1739	-145.413	1	1	1
12.2156	-147.034	1	1	1
12.2572	-148.583	1	1	1
12.2989	-150.143	1	1	1
12.3406	-151.682	1	1	1
12.3822	-153.17	1	1	1
12.4239	-154.638	1	1	1
12.4656	-156.096	1	1	1
12.5072	-157.594	1	1	1
12.5489	-159.011	1	1	1
12.5906	-159.929	1	1	1
12.6322	-161.274	1	1	1
12.6739	-162.538	1	1	1
12.7156	-163.843	1	1	1
12.7572	-165.148	1	1	1
12.7989	-166.412	1	1	1
12.8406	-167.727	1	1	1
12.8822	-169.032	1	1	1
12.9239	-170.265	1	1	1
12.9656	-171.59	1	1	1
13.0072	-172.956	1	1	1
13.0489	-174.159	1	1	1
13.0906	-175.484	1	1	1
13.1322	-176.758	1	1	1
13.1739	-178.012	1	1	1
13.2156	-179.286	1	1	1
13.2572	-180.54	1	1	1
13.2989	-181.804	1	1	1
13.3406	-183.048	1	1	1
13.3822	-184.271	1	1	1
13.4239	-185.454	1	1	1
13.4656	-186.718	1	1	1
13.5072	-187.91	1	1	1
13.5489	-189.134	1	1	1
13.5906	-190.347	1	1	1
13.6322	-191.702	1	1	1
13.6739	-192.762	1	1	1
13.7156	-193.028	1	1	1
13.7572	-195.046	1	1	1
13.7989	-196.208	1	1	1
13.8406	-197.339	1	1	1
13.8822	-198.512	1	1	1
13.9239	-199.715	1	1	1
13.9656	-200.928	1	1	1
14.0072	-202.12	1	1	1
14.0489	-202.212	1	1	1
14.0906	-204.597	1	1	1
14.1322	-205.841	1	1	1
14.1739	-207.299	1	1	1
14.2156	-208.563	1	1	1
14.2572	-209.857	1	1	1
14.2989	-211.121	1	1	1
14.3406	-212.385	1	1	1
14.3822	-213.629	1	1	1
14.4239	-214.964	1	1	1
14.4656	-216.249	1	1	1
14.5072	-217.513	1	1	1
14.5489	-218.858	1	1	1
14.5906	-219.99	1	1	1
14.6322	-221.182	1	1	1
14.6739	-222.936	1	1	1
14.7156	-224.771	1	1	1
14.7572	-226.442	1	1	1
14.7989	-228.094	1	1	1
14.8406	-229.745	1	1	1
14.8822	-231.284	1	1	1
14.9239	-232.966	1	1	1
14.9656	-234.526	1	1	1
15.0072	-236.29	1	1	1
15.0489	-237.829	1	1	1
15.0906	-239.501	1	1	1
15.1322	-240.897	1	1	1
15.1739	-242.671	1	1	1
15.2156	-244.332	1	1	1
15.2572	-246.157	1	1	1
15.2989	-248.033	1	1	1
15.3406	-249.857	1	1	1
15.3822	-251.814	1	1	1
15.4239	-253.833	1	1	1
15.4656	-255.882	1	1	1
15.5072	-257.941	1	1	1
15.5489	-260.133	1	1	1
15.5906	-262.426	1	1	1
15.6322	-264.597	1	1	1
15.6739	-266.911	1	1	1
15.7156	-269.225	1	1	1
15.7572	-271.651	1	1	1
15.7989	-274.179	1	1	1
15.8406	-277.003	1	1	1
15.8822	-279.602	1	1	1
15.9239	-282.385	1	1	1
15.9656	-285.056	1	1	1
16.0072	-288.073	1	1	1
16.0489	-290.989	1	1	1
16.0906	-294.343	1	1	1
16.1322	-297.655	1	1	1
16.1739	-300.866	1	1	1
16.2156	-304.659	1	1	1
16.2572	-308.226	1	1	1
16.2989	-312.171	1	1	1
16.3406	-316.035	1	1	1
16.3822	-320.082	1	1	1
16.4239	-324.251	1	1	1
16.4656	-328.716	1	1	1
16.5072	-333.323	1	1	1
16.5489	-337.982	1	1	1
16.5906	-342.966	1	1	1
16.6322	-348.002	1	1	1
16.6739	-353.425	1	1	1
16.7156	-358.573	1	1	1
16.7572	-360.917	1	1	1
16.7989	-368.624	1	1	1
16.8406	-374.801	1	1	1
16.8822	-380.387	1	1	1
16.9239	-386.483	1	1	1
16.9656	-393.16	1	1	1
17.0072	-399.123	1	1	1
17.0489	-405.668	1	1	1
17.0906	-412.181	1	1	1
17.1322	-418.848	1	1	1
17.1739	-425.617	1	1	1
17.2156	-432.854	1	1	1
17.2572	-439.847	1	1	1
17.2989	-446.932	1	1	1
17.3406	-454.077	1	1	1
17.3822	-462.263	1	1	1
17.4239	-469.98	1	1	1
17.4656	-477.941	1	1	1
17.5072	-486.371	1	1	1
17.5489	-494.434	1	1	1
17.5906	-503.517	1	1	1
17.6322	-512.548	1	1	1
17.6739	-521.733	1	1	1
17.7156	-531.927	1	1	1
17.7572	-542.008	1	1	1
17.7989	-552.559	1	1	1
17.8406	-562.752	1	1	1
17.8822	-569.113	1	1	1
17.9239	-584.811	1	1	1
17.9656	-597.645	1	1	1
18.0072	-611.6	1	1	1
18.0489	-625.8	1	1	1
18.0906	-639.99	1	1	1
18.1322	-654.516	1	1	1
18.1739	-670.102	1	1	1
18.2156	-686.065	1	1	1
18.2572	-699.959	1	1	1
18.2989	-717.288	1	1	1
18.3406	-734.271	1	1	1
18.3822	-751.764	1	1	1
18.4239	-769.806	1	1	1
18.4656	-789.378	1	1	1
18.5072	-811.468	1	1	1
18.5489	-834.281	1	1	1
18.5906	-858.685	1	1	1
21.2572	-8970.44	1	1	1
0.741523	0.922623	2	0	100000
1.07069	0.897295	2	0	100000
1.63809	0.857664	2	0	100000
1.98284	0.838934	2	0	100000
2.21243	0.826885	2	0	100000
2.74305	0.799098	2	0	100000
2.97847	0.786311	2	0	100000
3.63691	0.750246	2	0	100000
3.97205	0.732049	2	0	100000
4.65862	0.696475	2	0	100000
5.16245	0.66959	2	0	100000
5.63646	0.64459	2	0	100000
6.08123	0.621352	2	0	100000
6.73371	0.590328	2	0	100000
7.85422	0.541107	2	0	100000
8.62332	0.507336	2	0	100000
9.59697	0.458156	2	0	100000
9.9325	0.442951	2	0	100000
10.5862	0.412787	2	0	100000
10.9422	0.396844	2	0	100000
11.5972	0.367828	2	0	100000
11.9707	0.350287	2	0	100000
12.5901	0.322213	2	0	100000
13.0136	0.303156	2	0	100000
13.6524	0.273115	2	0	100000
14.0474	0.255328	2	0	100000
14.6128	0.230328	2	0	100000
16.7386	0.145738	2	0	100000
17.8586	0.11959	2	0	100000
18.7484	0.102254	2	0	100000
19.0019	0.0977459	2	0	100000
19.6486	0.0865164	2	0	100000
20.6316	0.0712705	2	0	100000
22.7615	0.045041	2	0	100000

## Sheet: tens_interpolation
		Datum / Zeit	Tension unten [hPa]	Tension oben [hPa]
m_bot	b_bot	2013-07-31 15:49:15	0.65	3.59
82.8	-3.43509e+06	2013-07-31 16:09:15	1.8	4.76
m_top	b_top	2013-07-31 15:53:59	0.921717	3.86644
84.24	-3.49483e+06	y = m*x+b
		AE unten [t]	AE oben [t]
		41227.2
			Brutto-Gewicht [g]	Netto-Gewicht [g]
-1.40314	58626.9	2013-08-23 17:58:52	382.99	12.72
		2013-08-24 10:54:53	382	11.73
-1.40314	58256.7	2013-08-24 06:49:00	382.24	11.9696
			AE unten
m_bot	b_bot	2012-11-12 09:52:24	595.08	28.48
-3.5343	146298	2012-11-15 10:52:20	584.33	17.73
m_top	b_top	2012-11-16 08:39:32	581.122	14.5216
-3.5343	145731	y = m*x+b
